# Supplementary material
Source: PubMed Central journal article supplement (PMC3337759)
Supplement: NIHMS369233-supplement-01.pdf [file NIHMS369233-supplement-01.pdf]

## ONLINE SUPPLEMENT

### Endothelial Caveolar Hub Regulation of ATP-induced eNOS Subcellular Partitioning and

### Domain-Specific Phosphorylation

**Short title:** Caveolar Hubs for ATP-induced eNOS Regulation

Jayanth Ramadoss, PhD<sup>1</sup>, Wu-xiang Liao, PhD<sup>4</sup>, Timothy J. Morschauser, BS<sup>1</sup>, Gladys E. Lopez, MS<sup>1</sup>, Manish S. Patankar, PhD<sup>1</sup>, Dong-bao Chen, PhD<sup>4</sup>, Ronald R. Magness, PhD<sup>1,2,3</sup>

<sup>1</sup> Department of Obstetrics and Gynecology, University of Wisconsin-Madison, WI, USA

<sup>2</sup> Department of Pediatrics, University of Wisconsin-Madison, WI, USA

<sup>3</sup> Department of Animal Sciences, University of Wisconsin,-Madison, WI, USA

<sup>4</sup> Department of Obstetrics & Gynecology, University of California-Irvine, CA, USA

Send correspondence to: Ronald. R. Magness, PhD: Department of Obstetrics and Gynecology, University of Wisconsin-Madison, Atrium-B Meriter Hospital, 202 S. Park S., Madison, WI-53715  
(608) 417-6314; Fax; (608) 257-1304; Email: [rmagness@wisc.edu](mailto:rmagness@wisc.edu)

## **EXPANDED METHODS**

**ATP Treatment:** Protocols were approved by the University of Wisconsin-Madison Animal Care Committee <sup>1</sup>. Primary endothelial cell lines from three biological replicates were utilized. For the whole cell experiments, analyses were performed in duplicate. In brief, uterine arteries from pregnant ewes were dissected and the endothelial cells were isolated using collagenase digestion procedures and fluorescence activated cell sorting (FACS) to ensure they were devoid of vascular smooth muscle cell contamination. The procedure for isolation and validation of the cell lines have been described previously and consisted of performing Western analysis for PECAM, eNOS and smooth muscle myosin (negative control) <sup>2, 3</sup>. Further, preparations were examined for the typical endothelial cell phenotypic cobblestone morphology and were maintained in culture to passage 4 as described previously <sup>3</sup>. These cells were cultured on slides or T75 flasks until ~80% confluence was achieved. After a 4-h serum withdrawal, cells were treated with media with or without ATP (5 min, 100 $\mu$ M). The time and dose were selected based on a previously published study <sup>4</sup> and a preliminary time course study at 0 min, 1 min, 2.5 min, 5 min, and 10 min of ATP treatment showing peak dissociation of eNOS from the caveolar scaffolding protein cav-1 at 5 min.

**Caveolar isolation, peptide digestion, and proteomic analysis:** Passage 3 cells were grown to approximately 80% confluence in a T75 flask and then split (passage 4) into five T75s for each cell line. Following ATP treatment, for each cell line, the protein from the respective five T75s were pooled and then caveolar isolation was performed using discontinuous sucrose density gradient centrifugation as described previously <sup>5, 6</sup>. In brief, cells were collected in a 0.5 ml sodium carbonate buffer (pH 11) containing phosphatase inhibitors and protease inhibitors. A light scattering band confined to the 5-35% sucrose interface was observed when enriched with caveolar membranes. The cell suspension was homogenized and sonicated on ice. The protein concentration was measured and adjusted to same protein loading amounts between samples using the sodium bicarbonate buffer. Following this step, proteins from aliquots of caveolar fractions were extracted by precipitation with equal volume of 15% ice trichloroacetic acid, incubated 1hr on ice, and centrifuged for 10 minutes (4 °C) at 16,000 x g. Pelleted proteins were re-solubilized and denatured in 10 $\mu$ l of 6M Urea and 100mM NH<sub>4</sub>HCO<sub>3</sub> for 10 minutes then diluted to 50  $\mu$ l for digestion with 1 $\mu$ l of 25mM DTT, 7  $\mu$ l acetonitrile, 22  $\mu$ l MilliQ water and 10  $\mu$ l of 20 ng/ $\mu$ l trypsin (Trypsin Gold, PROMEGA Inc.) in 25 mM NH<sub>4</sub>HCO<sub>3</sub> <sup>7</sup>. Following digestion for 2 hrs at 42°C, 10  $\mu$ l trypsin solution was added and incubated at 37 °C. The reaction was terminated by acidification with 2.5% trifluoroacetic acid. As described previously, peptides were analyzed by nanoLC-MS/MS using the Agilent 1100 nanoflow system (Agilent, Palo Alto, CA) connected to a hybrid linear ion trap-orbitrap mass spectrometer (LTQ-Orbitrap, Thermo Fisher Scientific, San Jose, CA) equipped with a nanoelectrospray ion source <sup>8</sup>. Capillary HPLC was performed using an in-house fabricated column with integrated electrospray emitter essentially <sup>9</sup> except for the usage of a 360  $\mu$ m OD (OD = Outer Diameter) x 75  $\mu$ m ID (ID = Inner Diameter) fused silica tubing. The column was packed with 5  $\mu$ m C<sub>18</sub> particles (Column Engineering, Ontario, CA) to approximately 12 cm. Sample loading (8  $\mu$ l) and desalting were achieved using a trapping column in line with the autosampler (Zorbax 300SB-C18, 5  $\mu$ m, 5 x 0.3 mm, Agilent). HPLC solvents were as follows: Loading: 1% (v/v) ACN, 0.1M acetic acid; A: 0.1M acetic acid in water, and B: 95% (v/v) acetonitrile, 0.1M acetic acid in water. Sample loading and desalting were done at 10  $\mu$ L/minutes with the loading solvent delivered from an isocratic pump. Gradient elution was performed at 200 nL/minutes and increasing %B in A of 0 to 40 in 200 minutes, 40 to 60 in 20 minutes, and 60 to 100 in 5 minutes. The LTQ-Orbitrap was set to acquire MS/MS spectra in data-dependent mode as follows: MS survey scans from m/z 300 to 2000 were collected in profile mode at a resolving power of 100,000. MS/MS spectra were collected on the five most-abundant signals in each survey scan. Dynamic exclusion was employed

to increase dynamic range and maximize peptide identifications. This feature excluded precursors up to 0.55 m/z below and 1.05 m/z above previously selected precursors. Precursors remained on the exclusion list for 15 seconds. Singly-charged ions and ions for which the charge state could not be assigned were rejected from consideration for MS/MS. Tandem mass spectra were extracted, charge state deconvoluted and deisotoped by BioWorks version 3.1. Raw MS/MS data were searched against NCBI non-redundant *Bos taurus* amino acid sequence database (Bos\_taurus\_020209; 64765 entries; for trypsin digestion) using in-house *Sequest* search engine (ThermoFinnigan, San Jose, CA; version 28, rev. 13) with a fragment ion mass tolerance of 0.50 Da, a parent ion tolerance of 2.5 Da and methionine oxidation as variable modification<sup>10-12</sup>. We utilized the *Bos taurus* database as there exists a close morphological-paleontological and immunological phylogenetic relationship as well as a mere  $2.92 \pm 0.08\%$  difference in the gene positions between the sheep and cow<sup>13, 14</sup>. Scaffold (version 2.06.02; Proteome Software Inc., Portland, OR) was used to validate MS/MS based peptide and protein identifications. Peptide identifications were accepted if they could be established at a probability of  $P < 0.05$  as specified by the Peptide Prophet algorithm<sup>15</sup>. Protein identifications were accepted if they could be established at probability  $P < 0.05$  and contained at least 'two' identified peptides. Protein probabilities were assigned by the Protein Prophet algorithm<sup>16</sup>. Proteins that contained similar peptides and could not be differentiated based on MS/MS analysis alone were grouped to satisfy the principles of parsimony. An estimate of protein enrichment was determined by using a normalized spectral count method similar to that described and validated recently by Stevenson and coworkers<sup>17</sup>. As described previously, counted spectra are provided by Scaffold in five different forms: 1) unique peptides, 2) unique spectra, 3) number of identified spectra and 4) percent of total spectra, and 5) unweighted spectral counts<sup>8, 17</sup>. In addition to these, the Scaffold software version 2.06.02 provides a more sophisticated parameter called quantitative value to estimate protein enrichment and is derived from averaging the spectrum counts across biosamples within groups, followed by averaging the spectral counts between groups, and then multiplying the spectrum counts in each group by the average divided by the individual biosample. Commonly observed impurities (keratins) and any protein (hemoglobin and unnamed protein) not found in standard endothelial caveolar analyses were not included for categorization. Manual classification was performed to identify the association of the proteins with nitric oxide based on previously published manuscripts. ATP transporters, ATPases, and ATP synthases were classified as ATP-related proteins. To our knowledge, the proteins that were not associated with NO or ATP were further sub classified into various cellular processes. In cases of very little information on the specific protein isoform and its relationship with NO, proteins were classified based on publications on the protein family.

**Immunoisolation:** Endothelial cells were lysed with a buffer containing 4 mM sodium pyrophosphate, 50 mM 4-(2-hydroxyethyl)-1-piperazineethanesulfonic acid, 100 mM sodium chloride, 10 mM ethylenediaminetetraacetic acid, 10 mM sodium fluoride, 2mM sodium orthovanadate, 2 mM phenylmethanesulfonylfluoride, 1% V/V Triton X-100, 5 ug/ml aprotinin, 5ug/ml leupeptin, and 1ug/ml microcystin, pH 7.4. Lysates were loaded with beads (Carbolink Immobilization kit; Pierce, Rockford, IL) coupled to anti-cav-1 antibody (Cell Signaling Tech. Inc.). The cav-1 bound fraction was subsequently eluted according to manufacturer's instructions.

**Immunoblotting:** Solubilized protein was quantified using a modified Lowry assay procedure (Bio-Rad Laboratories, Inc., Hercules, CA), and equal volume or mass of protein were separated by size on 4-20% polyacrylamide gels (150 V, 42 min; Mini Protean II, Bio-Rad Laboratories, Inc.) alongside Rainbow molecular weight markers (Bio-Rad Laboratories, Inc.) before transfer to Immobilon P membranes (100 V, 1 h). The Immobilon P membranes were probed using the enhanced chemiluminescence reagent detection system, as described by Amersham Pharmacia Biotech (Arlington

Heights, IL), and exposed to Hyperfilm (Amersham Pharmacia Biotech). Antibodies to cav-1 and GAPDH were obtained from Cell Signaling Technologies Inc., total eNOS from BD Transduction laboratories, and all phosphorylated eNOS antibodies from Millipore Inc with the exception of Ser1179 (Cell Signaling Tech. Inc.).

**Statistics:** Effects of ATP on subcellular distribution were analyzed using a two-way mixed ANOVA with treatment group as between factor and subcellular compartment as within factor. When appropriate, an analysis of simple effect was performed using one-way ANOVA. Further pairwise comparisons were performed when appropriate using Bonferroni or Fisher's protected least significant difference. For immunoisolation data, Student's T test was utilized to compare Control and ATP treatment groups. Level of significance was established at  $P < 0.05$  *a priori*.  $0.05 < P < 0.1$  were considered statistical trends.

## REFERENCE

1. Jobe SO, Fling SN, Ramadoss J, Magness RR. A novel role for an endothelial adrenergic receptor system in mediating catecholestradiol-induced proliferation of uterine artery endothelial cells. *Hypertension*. 2011;58:874-881.
2. Jobe SO, Ramadoss J, Koch JM, Jiang Y, Zheng J, Magness RR. Estradiol-17beta and its cytochrome p450- and catechol-o-methyltransferase-derived metabolites stimulate proliferation in uterine artery endothelial cells: Role of estrogen receptor-alpha versus estrogen receptor-beta. *Hypertension*. 2010;55:1005-1011.
3. Bird IM, Sullivan JA, Di T, Cale JM, Zhang L, Zheng J, Magness RR. Pregnancy-dependent changes in cell signaling underlie changes in differential control of vasodilator production in uterine artery endothelial cells. *Endocrinology*. 2000;141:1107-1117.
4. Cale JM, Bird IM. Dissociation of endothelial nitric oxide synthase phosphorylation and activity in uterine artery endothelial cells. *Am J Physiol Heart Circ Physiol*. 2006;290:H1433-1445.
5. Song KS, Li S, Okamoto T, Quilliam LA, Sargiacomo M, Lisanti MP. Co-purification and direct interaction of ras with caveolin, an integral membrane protein of caveolae microdomains. Detergent-free purification of caveolae microdomains. *J Biol Chem*. 1996;271:9690-9697.
6. Liao WX, Feng L, Zhang H, Zheng J, Moore TR, Chen DB. Compartmentalizing vegf-induced erk2/1 signaling in placental artery endothelial cell caveolae: A paradoxical role of caveolin-1 in placental angiogenesis in vitro. *Mol Endocrinol*. 2009.
7. Ramadoss J, Liao WX, Chen DB, Magness RR. High-throughput caveolar proteomic signature profile for maternal binge alcohol consumption. *Alcohol*. 2010;44:691-697.
8. Koch JM, Ramadoss J, Magness RR. Proteomic profile of uterine luminal fluid from early pregnant ewes. *Journal of proteome research*. 2010;9:3878-3885.
9. Martin SE, Shabanowitz J, Hunt DF, Marto JA. Subfemtomole ms and ms/ms peptide sequence analysis using nano-hplc micro-esi fourier transform ion cyclotron resonance mass spectrometry. *Anal Chem*. 2000;72:4266-4274.
10. Vanden Wymelenberg A, Gaskell J, Mozuch M, Sabat G, Ralph J, Skyba O, Mansfield SD, Blanchette RA, Martinez D, Grigoriev I, Kersten PJ, Cullen D. Comparative transcriptome and secretome analysis of wood decay fungi postia placenta and phanerochaete chrysosporium. *Appl Environ Microbiol*. 2010;76:3599-3610.

11. Sun S, Meyer-Arendt K, Eichelberger B, Brown R, Yen CY, Old WM, Pierce K, Cioș KJ, Ahn NG, Resing KA. Improved validation of peptide ms/ms assignments using spectral intensity prediction. *Mol Cell Proteomics*. 2007;6:1-17.
12. Wang J, Perez-Santiago J, Katz JE, Mallick P, Bandeira N. Peptide identification from mixture tandem mass spectra. *Mol Cell Proteomics*. 2010.
13. Lowenstein JM. Molecular phylogenetics. *Ann Rev. Earth Planet Sci*. 1986;14:71-83.
14. Kijas JW, Menzies M, Ingham A. Sequence diversity and rates of molecular evolution between sheep and cattle genes. *Anim Genet*. 2006;37:171-174.
15. Keller A, Nesvizhskii AI, Kolker E, Aebersold R. Empirical statistical model to estimate the accuracy of peptide identifications made by ms/ms and database search. *Anal Chem*. 2002;74:5383-5392.
16. Nesvizhskii AI, Keller A, Kolker E, Aebersold R. A statistical model for identifying proteins by tandem mass spectrometry. *Anal Chem*. 2003;75:4646-4658.
17. Stevenson SE, Chu Y, Ozias-Akins P, Thelen JJ. Validation of gel-free, label-free quantitative proteomics approaches: Applications for seed allergen profiling. *Journal of proteomics*. 2009;72:555-566.

Database Name: the Bos\_taurus\_020209 database

Version: unknown

Taxonomy: All Entries

Number of Proteins: 64765

Search Engine: Sequest

Version: 27, rev. 13

Samples: All Samples

Fragment Tolerance: 0.50 Da (Monoisotopic)

Parent Tolerance: 2.5 Da (Monoisotopic)

Fixed Modifications:

Variable Modifications: +16 on M (Oxidation)

Database: the Bos\_taurus\_020209 database (unknown version, 64765 entries)

Digestion Enzyme: Non-specific

Max Missed Cleavages: 2

Peptide Thresholds: 95.0% minimum

Protein Thresholds: 95.0% minimum and 2 peptides minimum

| Group   | Subject | Protein Name                                                                     | Protein accession numbers                                             | Protein molecular weight (Da) | Protein identification probability | # unique peptides | # unique spectra | # total spectra | % total spectra | % sequence coverage | Peptide sequence      | Best SEQUEST XCorr score | Calculated +1H Peptide Mass (AMU) |
|---------|---------|----------------------------------------------------------------------------------|-----------------------------------------------------------------------|-------------------------------|------------------------------------|-------------------|------------------|-----------------|-----------------|---------------------|-----------------------|--------------------------|-----------------------------------|
| Control | 6006    | TIMM23 protein                                                                   | gi 134025149,gi 139947578,gi 215274655                                | 21,809.90                     | 99.80%                             | 2                 | 2                | 2               | 0.02%           | 12.90%              | NVQILN MVTR           | 3.24                     | 1,203.65                          |
| Control | 6006    | TIMM23 protein                                                                   | gi 134025149,gi 139947578,gi 215274655                                | 21,809.90                     | 99.80%                             | 2                 | 2                | 2               | 0.02%           | 12.90%              | YLVQDT DEFILPT GANK   | 3.51                     | 1,923.97                          |
| Control | 6006    | Chain B, Subcomp lex Of The Stator Of Bovine Mitochondrial Atp Synthase          | gi 110591027,gi 110591030,gi 114686,gi 27807305,gi 599873,gi 74356487 | 18,544.10                     | 100.00%                            | 2                 | 2                | 2               | 0.02%           | 7.50%               | IQEYEKE LEK           | 2.97                     | 1,308.67                          |
| Control | 6006    | Chain B, Subcomp lex Of The Stator Of Bovine Mitochondrial Atp Synthase          | gi 110591027,gi 110591030,gi 114686,gi 27807305,gi 599873,gi 74356487 | 18,544.10                     | 100.00%                            | 2                 | 2                | 2               | 0.02%           | 7.50%               | IQEYEKE LEKMR         | 2.32                     | 1,611.80                          |
| Control | 6006    | PREDICTED: integrin, alpha 5 (fibronectin receptor, alpha polypeptide) isoform 3 | gi 194667041                                                          | 119,589.00                    | 100.00%                            | 7                 | 10               | 16              | 0.17%           | 9.24%               | DLDGNG YPDLIVG SFGVDK | 3.83                     | 1,980.96                          |

|         |      |                                                                                                    |                  |            |         |   |    |    |       |       |                                  |      |          |
|---------|------|----------------------------------------------------------------------------------------------------|------------------|------------|---------|---|----|----|-------|-------|----------------------------------|------|----------|
| Control | 6006 | PREDICTED:<br>integrin,<br>alpha 5<br>(fibronectin<br>receptor,<br>alpha polypeptide)<br>isoform 3 | gi 1946670<br>41 | 119,589.00 | 100.00% | 7 | 10 | 16 | 0.17% | 9.24% | DVPGRS<br>PASSGP<br>QILK         | 3.56 | 1,608.87 |
| Control | 6006 | PREDICTED:<br>integrin,<br>alpha 5<br>(fibronectin<br>receptor,<br>alpha polypeptide)<br>isoform 3 | gi 1946670<br>41 | 119,589.00 | 100.00% | 7 | 10 | 16 | 0.17% | 9.24% | LAGMEP<br>TPTLTLT<br>GQDEFG<br>R | 4.84 | 2,150.04 |
| Control | 6006 | PREDICTED:<br>integrin,<br>alpha 5<br>(fibronectin<br>receptor,<br>alpha polypeptide)<br>isoform 3 | gi 1946670<br>41 | 119,589.00 | 100.00% | 7 | 10 | 16 | 0.17% | 9.24% | QATLTQ<br>LLIQNG<br>AR           | 3.93 | 1,627.91 |
| Control | 6006 | PREDICTED:<br>integrin,<br>alpha 5<br>(fibronectin<br>receptor,<br>alpha polypeptide)<br>isoform 3 | gi 1946670<br>41 | 119,589.00 | 100.00% | 7 | 10 | 16 | 0.17% | 9.24% | TIQDFDQ<br>ILSK                  | 3.11 | 1,339.73 |
| Control | 6006 | PREDICTED:<br>integrin,<br>alpha 5<br>(fibronectin<br>receptor,<br>alpha polypeptide)<br>isoform 3 | gi 1946670<br>41 | 119,589.00 | 100.00% | 7 | 10 | 16 | 0.17% | 9.24% | VTAPPE<br>AEYSGL<br>VR           | 5.3  | 1,488.77 |
| Control | 6006 | PREDICTED:<br>integrin,<br>alpha 5<br>(fibronectin<br>receptor,<br>alpha polypeptide)<br>isoform 3 | gi 1946670<br>41 | 119,589.00 | 100.00% | 7 | 10 | 16 | 0.17% | 9.24% | VYIYLQ<br>R                      | 2.74 | 954.5407 |

|         |      |                                                                          |                                                                                                 |           |         |   |   |    |       |        |                                                  |          |
|---------|------|--------------------------------------------------------------------------|-------------------------------------------------------------------------------------------------|-----------|---------|---|---|----|-------|--------|--------------------------------------------------|----------|
| Control | 6006 | PREDICTED:<br>similar to EGF-like repeats and discoidin I-like domains 3 | gi 119895885                                                                                    | 52,071.20 | 100.00% | 2 | 2 | 2  | 0.02% | 7.96%  | GTNEDM 3.51<br>VFHGNV<br>DNNTPY<br>ANSFTTP<br>IK | 2,995.35 |
| Control | 6006 | PREDICTED:<br>similar to EGF-like repeats and discoidin I-like domains 3 | gi 119895885                                                                                    | 52,071.20 | 100.00% | 2 | 2 | 2  | 0.02% | 7.96%  | NVIDPPI 2.26<br>YAR                              | 1,157.63 |
| Control | 6006 | caveolin-1                                                               | gi 1840144,<br>gi 2493547,<br>gi 2780671<br>5,gi 383227<br>01,gi 56181<br>138                   | 20,577.50 | 100.00% | 4 | 7 | 12 | 0.13% | 29.20% | AMAEE 2.68<br>MNEKQV<br>YDAHTK                   | 2,010.89 |
| Control | 6006 | caveolin-1                                                               | gi 1840144,<br>gi 2493547,<br>gi 2780671<br>5,gi 383227<br>01,gi 56181<br>138                   | 20,577.50 | 100.00% | 4 | 7 | 12 | 0.13% | 29.20% | ASFTTFT 2.4<br>VTK                               | 1,102.58 |
| Control | 6006 | caveolin-1                                                               | gi 1840144,<br>gi 2493547,<br>gi 2780671<br>5,gi 383227<br>01,gi 56181<br>138                   | 20,577.50 | 100.00% | 4 | 7 | 12 | 0.13% | 29.20% | YVDSEG 2.79<br>HLYTVPI<br>R                      | 1,648.83 |
| Control | 6006 | caveolin-1                                                               | gi 1840144,<br>gi 2493547,<br>gi 2780671<br>5,gi 383227<br>01,gi 56181<br>138                   | 20,577.50 | 100.00% | 4 | 7 | 12 | 0.13% | 29.20% | YVDSEG 5.87<br>HLYTVPI<br>REQNI<br>YKPNNK        | 2,934.47 |
| Control | 6006 | RTN3 protein                                                             | gi 115305093,gi 12213<br>2179,gi 146<br>231798,gi 1<br>51554368,gi 32880223,<br>gi 3832759<br>4 | 25,478.60 | 99.80%  | 2 | 4 | 4  | 0.04% | 5.49%  | TQIDHY 3.66<br>VGIAR                             | 1,272.67 |
| Control | 6006 | RTN3 protein                                                             | gi 115305093,gi 12213<br>2179,gi 146<br>231798,gi 1<br>51554368,gi 32880223,<br>gi 3832759<br>4 | 25,478.60 | 99.80%  | 2 | 4 | 4  | 0.04% | 5.49%  | YKTQID 3.15<br>HYVGIA<br>R                       | 1,563.83 |
| Control | 6006 | LMAN2 protein                                                            | gi 151553875,gi 15537<br>2333                                                                   | 40,385.10 | 100.00% | 5 | 6 | 7  | 0.08% | 20.10% | DNFHGL 2.95<br>AIFLDY<br>PNDETT<br>ER            | 2,468.14 |
| Control | 6006 | LMAN2 protein                                                            | gi 151553875,gi 15537<br>2333                                                                   | 40,385.10 | 100.00% | 5 | 6 | 7  | 0.08% | 20.10% | DNVDDP 3.17<br>TGNFR                             | 1,249.54 |



|         |      |                                                                           |                                        |            |         |    |    |    |       |        |                                           |      |          |
|---------|------|---------------------------------------------------------------------------|----------------------------------------|------------|---------|----|----|----|-------|--------|-------------------------------------------|------|----------|
| Control | 6006 | LMAN2 protein                                                             | gi 151553875,gi 155372333              | 40,385.10  | 100.00% | 5  | 6  | 7  | 0.08% | 20.10% | LPTGYY<br>FGASAG<br>TGDLS<br>NHDIISM<br>K | 5.15 | 2,746.27 |
| Control | 6006 | LMAN2 protein                                                             | gi 151553875,gi 155372333              | 40,385.10  | 100.00% | 5  | 6  | 7  | 0.08% | 20.10% | NRDHD<br>T<br>FLAVR                       | 3.09 | 1,343.68 |
| Control | 6006 | LMAN2 protein                                                             | gi 151553875,gi 155372333              | 40,385.10  | 100.00% | 5  | 6  | 7  | 0.08% | 20.10% | SPKDNV<br>DDPTGN<br>FR                    | 4.43 | 1,561.72 |
| Control | 6006 | LOC789567 protein                                                         | gi 148878411,gi 155372329              | 34,911.10  | 99.80%  | 2  | 2  | 2  | 0.02% | 4.81%  | SQDKLN<br>QVSSEIR                         | 2.93 | 1,503.78 |
| Control | 6006 | LOC789567 protein                                                         | gi 148878411,gi 155372329              | 34,911.10  | 99.80%  | 2  | 2  | 2  | 0.02% | 4.81%  | SQDKLN<br>QVSSEIR<br>EK                   | 5.03 | 1,760.91 |
| Control | 6006 | PREDICTED: similar to polypeptide of N-acetylgalactosaminyltransferase 2  | gi 119918373                           | 64,740.20  | 100.00% | 4  | 4  | 4  | 0.04% | 8.93%  | EILVDD<br>YSNDPE<br>DGALLG<br>K           | 3.09 | 2,176.07 |
| Control | 6006 | PREDICTED: similar to polypeptide of N-acetylgalactosaminyltransferase 2  | gi 119918373                           | 64,740.20  | 100.00% | 4  | 4  | 4  | 0.04% | 8.93%  | EILVDD<br>YSNDPE<br>DGALLG<br>KIEK        | 3.36 | 2,546.29 |
| Control | 6006 | PREDICTED: similar to polypeptide of N-acetylgalactosaminyltransferase 2  | gi 119918373                           | 64,740.20  | 100.00% | 4  | 4  | 4  | 0.04% | 8.93%  | NKFNQV<br>ESDKLR                          | 3.43 | 1,477.78 |
| Control | 6006 | PREDICTED: similar to polypeptide of N-acetylgalactosaminyltransferase 2  | gi 119918373                           | 64,740.20  | 100.00% | 4  | 4  | 4  | 0.04% | 8.93%  | QHPYTF<br>PGGSGT<br>VFAR                  | 3.83 | 1,721.84 |
| Control | 6006 | ATPase, Na <sup>+</sup> /K <sup>+</sup> transporting, alpha 1 polypeptide | gi 115305284,gi 116003819,gi 122132194 | 112,627.60 | 100.00% | 22 | 35 | 53 | 0.58% | 24.10% | ADIGVA<br>MGIAGS<br>DVSK                  | 3.47 | 1,506.75 |
| Control | 6006 | ATPase, Na <sup>+</sup> /K <sup>+</sup> transporting, alpha 1 polypeptide | gi 115305284,gi 116003819,gi 122132194 | 112,627.60 | 100.00% | 22 | 35 | 53 | 0.58% | 24.10% | AVAGDA<br>SESALLK                         | 4.46 | 1,231.65 |

|         |      |                                                  |                                        |            |         |    |    |    |       |        |                              |      |          |
|---------|------|--------------------------------------------------|----------------------------------------|------------|---------|----|----|----|-------|--------|------------------------------|------|----------|
| Control | 6006 | ATPase, Na+/K+ transporting, alpha 1 polypeptide | gi 115305284.gi 116003819.gi 122132194 | 112,627.60 | 100.00% | 22 | 35 | 53 | 0.58% | 24.10% | AVFQAN QDNLPIK               | 3.1  | 1,570.86 |
| Control | 6006 | ATPase, Na+/K+ transporting, alpha 1 polypeptide | gi 115305284.gi 116003819.gi 122132194 | 112,627.60 | 100.00% | 22 | 35 | 53 | 0.58% | 24.10% | AVFQAN QDNLPIKR              | 2.18 | 1,726.96 |
| Control | 6006 | ATPase, Na+/K+ transporting, alpha 1 polypeptide | gi 115305284.gi 116003819.gi 122132194 | 112,627.60 | 100.00% | 22 | 35 | 53 | 0.58% | 24.10% | EQPLDE ELKDAF QNAYLE LGGLGER | 3.89 | 2,834.38 |
| Control | 6006 | ATPase, Na+/K+ transporting, alpha 1 polypeptide | gi 115305284.gi 116003819.gi 122132194 | 112,627.60 | 100.00% | 22 | 35 | 53 | 0.58% | 24.10% | EVSMDD HKLSLDELHR            | 1.93 | 1,939.92 |
| Control | 6006 | ATPase, Na+/K+ transporting, alpha 1 polypeptide | gi 115305284.gi 116003819.gi 122132194 | 112,627.60 | 100.00% | 22 | 35 | 53 | 0.58% | 24.10% | EVSMDD HKLSLDELHRK           | 2.87 | 2,068.01 |
| Control | 6006 | ATPase, Na+/K+ transporting, alpha 1 polypeptide | gi 115305284.gi 116003819.gi 122132194 | 112,627.60 | 100.00% | 22 | 35 | 53 | 0.58% | 24.10% | GVGIISE GNETVE DIAAR         | 4.85 | 1,829.92 |
| Control | 6006 | ATPase, Na+/K+ transporting, alpha 1 polypeptide | gi 115305284.gi 116003819.gi 122132194 | 112,627.60 | 100.00% | 22 | 35 | 53 | 0.58% | 24.10% | IVEIPFNS TNK                 | 2.63 | 1,261.68 |
| Control | 6006 | ATPase, Na+/K+ transporting, alpha 1 polypeptide | gi 115305284.gi 116003819.gi 122132194 | 112,627.60 | 100.00% | 22 | 35 | 53 | 0.58% | 24.10% | KADIGV AMGIAG SDVSK          | 4.9  | 1,634.84 |
| Control | 6006 | ATPase, Na+/K+ transporting, alpha 1 polypeptide | gi 115305284.gi 116003819.gi 122132194 | 112,627.60 | 100.00% | 22 | 35 | 53 | 0.58% | 24.10% | LNIPVSQ VNPR                 | 4.13 | 1,236.71 |
| Control | 6006 | ATPase, Na+/K+ transporting, alpha 1 polypeptide | gi 115305284.gi 116003819.gi 122132194 | 112,627.60 | 100.00% | 22 | 35 | 53 | 0.58% | 24.10% | LSLDEL HR                    | 2.38 | 982.5317 |

|         |      |                                                  |                                        |            |         |    |    |    |       |        |                                    |      |          |
|---------|------|--------------------------------------------------|----------------------------------------|------------|---------|----|----|----|-------|--------|------------------------------------|------|----------|
| Control | 6006 | ATPase, Na+/K+ transporting, alpha 1 polypeptide | gi 115305284.gi 116003819.gi 122132194 | 112,627.60 | 100.00% | 22 | 35 | 53 | 0.58% | 24.10% | LSLDEL HRK                         | 2.04 | 1,110.63 |
| Control | 6006 | ATPase, Na+/K+ transporting, alpha 1 polypeptide | gi 115305284.gi 116003819.gi 122132194 | 112,627.60 | 100.00% | 22 | 35 | 53 | 0.58% | 24.10% | MSINAE EVVVGDLVEVK                 | 4.37 | 1,846.95 |
| Control | 6006 | ATPase, Na+/K+ transporting, alpha 1 polypeptide | gi 115305284.gi 116003819.gi 122132194 | 112,627.60 | 100.00% | 22 | 35 | 53 | 0.58% | 24.10% | NMVPQQ ALVIR                       | 2.27 | 1,284.71 |
| Control | 6006 | ATPase, Na+/K+ transporting, alpha 1 polypeptide | gi 115305284.gi 116003819.gi 122132194 | 112,627.60 | 100.00% | 22 | 35 | 53 | 0.58% | 24.10% | QAADMI LLDDNF ASIVTGV EEGR         | 3.44 | 2,480.20 |
| Control | 6006 | ATPase, Na+/K+ transporting, alpha 1 polypeptide | gi 115305284.gi 116003819.gi 122132194 | 112,627.60 | 100.00% | 22 | 35 | 53 | 0.58% | 24.10% | QAADMI LLDDNF ASIVTGV EEGLIF DNLKK | 3.49 | 3,435.78 |
| Control | 6006 | ATPase, Na+/K+ transporting, alpha 1 polypeptide | gi 115305284.gi 116003819.gi 122132194 | 112,627.60 | 100.00% | 22 | 35 | 53 | 0.58% | 24.10% | QGAIVA VTGDGV NDSPAL K             | 3.62 | 1,811.95 |
| Control | 6006 | ATPase, Na+/K+ transporting, alpha 1 polypeptide | gi 115305284.gi 116003819.gi 122132194 | 112,627.60 | 100.00% | 22 | 35 | 53 | 0.58% | 24.10% | QGAIVA VTGDGV NDSPAL KK            | 3.89 | 1,940.05 |
| Control | 6006 | ATPase, Na+/K+ transporting, alpha 1 polypeptide | gi 115305284.gi 116003819.gi 122132194 | 112,627.60 | 100.00% | 22 | 35 | 53 | 0.58% | 24.10% | SPDFTNE NPLETR                     | 4.11 | 1,519.70 |
| Control | 6006 | ATPase, Na+/K+ transporting, alpha 1 polypeptide | gi 115305284.gi 116003819.gi 122132194 | 112,627.60 | 100.00% | 22 | 35 | 53 | 0.58% | 24.10% | VDNSSL TGESEP QTR                  | 3.66 | 1,619.75 |
| Control | 6006 | ATPase, Na+/K+ transporting, alpha 1 polypeptide | gi 115305284.gi 116003819.gi 122132194 | 112,627.60 | 100.00% | 22 | 35 | 53 | 0.58% | 24.10% | VIMVTG DHPITAK                     | 4.24 | 1,397.75 |

|         |      |                                                                                                           |                                                                                 |            |         |   |   |   |       |        |                                    |      |          |
|---------|------|-----------------------------------------------------------------------------------------------------------|---------------------------------------------------------------------------------|------------|---------|---|---|---|-------|--------|------------------------------------|------|----------|
| Control | 6006 | PREDICTED:<br>similar to<br>C4b-binding protein alpha chain precursor (C4bp) (Proline-rich protein) (PRP) | gi 7667751<br>4                                                                 | 21,762.00  | 99.80%  | 2 | 3 | 3 | 0.03% | 15.40% | LSLEIEK<br>LEQEKR                  | 3.11 | 1,614.91 |
| Control | 6006 | PREDICTED:<br>similar to<br>C4b-binding protein alpha chain precursor (C4bp) (Proline-rich protein) (PRP) | gi 7667751<br>4                                                                 | 21,762.00  | 99.80%  | 2 | 3 | 3 | 0.03% | 15.40% | LSVEKD<br>QYVSPE<br>TVTVR          | 3.62 | 1,950.02 |
| Control | 6006 | COL18A1 protein                                                                                           | gi 1337781<br>03,gi 13408<br>5613,gi 157<br>742960                              | 135,049.70 | 99.80%  | 2 | 2 | 2 | 0.02% | 2.33%  | LFVAQA<br>GGADPE<br>KFQGLIS<br>ELR | 4.05 | 2,346.25 |
| Control | 6006 | COL18A1 protein                                                                                           | gi 1337781<br>03,gi 13408<br>5613,gi 157<br>742960                              | 135,049.70 | 99.80%  | 2 | 2 | 2 | 0.02% | 2.33%  | LQDLYSI<br>VR                      | 2.88 | 1,106.62 |
| Control | 6006 | NADH dehydrogenase                                                                                        | gi 256,gi 28<br>461255,gi 4<br>00533,gi 73<br>587329                            | 20,946.90  | 100.00% | 3 | 3 | 3 | 0.03% | 28.40% | AFDLLV<br>DRPVTL<br>VR             | 2.54 | 1,613.94 |
| Control | 6006 | NADH dehydrogenase                                                                                        | gi 256,gi 28<br>461255,gi 4<br>00533,gi 73<br>587329                            | 20,946.90  | 100.00% | 3 | 3 | 3 | 0.03% | 28.40% | AYQDRY<br>HDLGAH<br>YSAR           | 2.24 | 1,922.89 |
| Control | 6006 | NADH dehydrogenase                                                                                        | gi 256,gi 28<br>461255,gi 4<br>00533,gi 73<br>587329                            | 20,946.90  | 100.00% | 3 | 3 | 3 | 0.03% | 28.40% | RTPAPSP<br>QTSLPNP<br>ITYLTK       | 2.74 | 2,182.19 |
| Control | 6006 | ribosomal protein L18                                                                                     | gi 5985845<br>9,gi 627520<br>12,gi 75060<br>915,gi 7577<br>5560,gi 895<br>73893 | 21,518.10  | 100.00% | 3 | 4 | 4 | 0.04% | 18.10% | ILTFDQL<br>ALDSPK                  | 3.13 | 1,460.80 |
| Control | 6006 | ribosomal protein L18                                                                                     | gi 5985845<br>9,gi 627520<br>12,gi 75060<br>915,gi 7577<br>5560,gi 895<br>73893 | 21,518.10  | 100.00% | 3 | 4 | 4 | 0.04% | 18.10% | TNRPPLS<br>LSR                     | 3.01 | 1,140.65 |
| Control | 6006 | ribosomal protein L18                                                                                     | gi 5985845<br>9,gi 627520<br>12,gi 75060<br>915,gi 7577<br>5560,gi 895<br>73893 | 21,518.10  | 100.00% | 3 | 4 | 4 | 0.04% | 18.10% | TNSTFN<br>QVVLK                    | 2.86 | 1,250.67 |

|         |      |                                                                                                                                                                                                                                      |           |         |   |   |   |       |       |                               |          |
|---------|------|--------------------------------------------------------------------------------------------------------------------------------------------------------------------------------------------------------------------------------------|-----------|---------|---|---|---|-------|-------|-------------------------------|----------|
| Control | 6006 | RecName gi 1098919 : 34,gi 28461 Full=Isoc itrate gi 7358732 dehydrog 3 enase [NADP], mitochon drial; Short=ID H; AltName: Full=Oxa losuccina te decarbox ylase; AltName: Full=NA DP(+)- specific ICDH; AltName: Full=IDP ; AltName: | 50,807.00 | 99.80%  | 2 | 2 | 2 | 0.02% | 5.97% | LIDDMV 2.59<br>AQVLK          | 1,260.69 |
| Control | 6006 | RecName gi 1098919 : 34,gi 28461 Full=Isoc itrate gi 7358732 dehydrog 3 enase [NADP], mitochon drial; Short=ID H; AltName: Full=Oxa losuccina te decarbox ylase; AltName: Full=NA DP(+)- specific ICDH; AltName: Full=IDP ; AltName: | 50,807.00 | 99.80%  | 2 | 2 | 2 | 0.02% | 5.97% | LNEHFL 3.51<br>NTSDFL<br>DTIK | 1,906.95 |
| Control | 6006 | endotheli n- convertin g enzyme gi 1092971, gi 1248291 88,gi 19035 9620,gi 229 9388,gi 229 9395,gi 307 94312,gi 53 5075,gi 688 290,gi 8976 02                                                                                        | 85,603.70 | 100.00% | 3 | 6 | 8 | 0.09% | 5.54% | HTLGENI 3.91<br>ADNGGL<br>K   | 1,438.73 |

|         |      |                                                                 |                                                                                                            |           |         |    |    |    |       |        |                                 |          |
|---------|------|-----------------------------------------------------------------|------------------------------------------------------------------------------------------------------------|-----------|---------|----|----|----|-------|--------|---------------------------------|----------|
| Control | 6006 | endothelin-converting enzyme                                    | gi 1092971, gi 1248291, gi 190359620, gi 2299388, gi 2299395, gi 30794312, gi 535075, gi 688290, gi 897602 | 85,603.70 | 100.00% | 3  | 6  | 8  | 0.09% | 5.54%  | RRDEELI 2.12<br>YHK             | 1,358.72 |
| Control | 6006 | endothelin-converting enzyme                                    | gi 1092971, gi 1248291, gi 190359620, gi 2299388, gi 2299395, gi 30794312, gi 535075, gi 688290, gi 897602 | 85,603.70 | 100.00% | 3  | 6  | 8  | 0.09% | 5.54%  | TPESSHE 4.42<br>GLITDPH<br>SPSR | 1,946.92 |
| Control | 6006 | RecName: Full=Citrate synthase, mitochondrial; Flags: Precursor | gi 109820508, gi 113461977, gi 88954189                                                                    | 51,755.90 | 99.80%  | 2  | 2  | 2  | 0.02% | 5.79%  | GLVYET 2.67<br>SVLDPD<br>EGIR   | 1,762.89 |
| Control | 6006 | RecName: Full=Citrate synthase, mitochondrial; Flags: Precursor | gi 109820508, gi 113461977, gi 88954189                                                                    | 51,755.90 | 99.80%  | 2  | 2  | 2  | 0.02% | 5.79%  | IVPNILL 2.19<br>EQGK            | 1,223.74 |
| Control | 6006 | PRKCD BP protein                                                | gi 133778193, gi 134085797, gi 187611336                                                                   | 27,468.60 | 100.00% | 5  | 5  | 6  | 0.07% | 23.50% | KGHAAP 2.72<br>TPTPVKP<br>PR    | 1,553.89 |
| Control | 6006 | PRKCD BP protein                                                | gi 133778193, gi 134085797, gi 187611336                                                                   | 27,468.60 | 100.00% | 5  | 5  | 6  | 0.07% | 23.50% | LATMLE 2.56<br>TLR              | 1,063.58 |
| Control | 6006 | PRKCD BP protein                                                | gi 133778193, gi 134085797, gi 187611336                                                                   | 27,468.60 | 100.00% | 5  | 5  | 6  | 0.07% | 23.50% | LEANHG 3.35<br>LLVAR            | 1,192.68 |
| Control | 6006 | PRKCD BP protein                                                | gi 133778193, gi 134085797, gi 187611336                                                                   | 27,468.60 | 100.00% | 5  | 5  | 6  | 0.07% | 23.50% | RIQSNLG 3.93<br>ALSR            | 1,214.70 |
| Control | 6006 | PRKCD BP protein                                                | gi 133778193, gi 134085797, gi 187611336                                                                   | 27,468.60 | 100.00% | 5  | 5  | 6  | 0.07% | 23.50% | SHDTTS 4.48<br>NTLAQL<br>LAK    | 1,599.83 |
| Control | 6006 | PREDICTED: similar to Histone H4 replacement CG3379-PC          | gi 119915709, gi 119915719, gi 76613952, gi 76616306, gi 76631252, gi 76631262, gi 76631717                | 11,349.70 | 100.00% | 13 | 23 | 83 | 0.90% | 62.10% | DNIQGIT 3.57<br>KPAIR           | 1,325.75 |

|         |      |                                                                                                                                             |           |         |    |    |    |       |        |                             |          |
|---------|------|---------------------------------------------------------------------------------------------------------------------------------------------|-----------|---------|----|----|----|-------|--------|-----------------------------|----------|
| Control | 6006 | PREDIC TED: 09,gi 11991 similar to 5719,gi 119 Histone 915738,gi 7 H4 6613952,gi 76616306,gent i 76631252,CG3379- gi 7663126 PC 2,gi 766317 | 11,349.70 | 100.00% | 13 | 23 | 83 | 0.90% | 62.10% | DNIQGIT 2.67<br>KPAIRR      | 1,481.85 |
| Control | 6006 | PREDIC TED: 09,gi 11991 similar to 5719,gi 119 Histone 915738,gi 7 H4 6613952,gi 76616306,gent i 76631252,CG3379- gi 7663126 PC 2,gi 766317 | 11,349.70 | 100.00% | 13 | 23 | 83 | 0.90% | 62.10% | ISGLIYE 4.27<br>ETR         | 1,180.62 |
| Control | 6006 | PREDIC TED: 09,gi 11991 similar to 5719,gi 119 Histone 915738,gi 7 H4 6613952,gi 76616306,gent i 76631252,CG3379- gi 7663126 PC 2,gi 766317 | 11,349.70 | 100.00% | 13 | 23 | 83 | 0.90% | 62.10% | ISGLIYE 3.02<br>ETRGVL<br>K | 1,577.89 |
| Control | 6006 | PREDIC TED: 09,gi 11991 similar to 5719,gi 119 Histone 915738,gi 7 H4 6613952,gi 76616306,gent i 76631252,CG3379- gi 7663126 PC 2,gi 766317 | 11,349.70 | 100.00% | 13 | 23 | 83 | 0.90% | 62.10% | KTVTAM 3.93<br>DVVYAL<br>K  | 1,454.79 |
| Control | 6006 | PREDIC TED: 09,gi 11991 similar to 5719,gi 119 Histone 915738,gi 7 H4 6613952,gi 76616306,gent i 76631252,CG3379- gi 7663126 PC 2,gi 766317 | 11,349.70 | 100.00% | 13 | 23 | 83 | 0.90% | 62.10% | KTVTAM 5.56<br>DVVYAL<br>KR | 1,610.89 |
| Control | 6006 | PREDIC TED: 09,gi 11991 similar to 5719,gi 119 Histone 915738,gi 7 H4 6613952,gi 76616306,gent i 76631252,CG3379- gi 7663126 PC 2,gi 766317 | 11,349.70 | 100.00% | 13 | 23 | 83 | 0.90% | 62.10% | RISGLIY 2.56<br>EETR        | 1,336.72 |
| Control | 6006 | PREDIC TED: 09,gi 11991 similar to 5719,gi 119 Histone 915738,gi 7 H4 6613952,gi 76616306,gent i 76631252,CG3379- gi 7663126 PC 2,gi 766317 | 11,349.70 | 100.00% | 13 | 23 | 83 | 0.90% | 62.10% | RKTVTA 3.67<br>MDVVY<br>ALK | 1,610.89 |

|         |      |                                                                                               |                                                                                                                                        |           |         |    |    |    |       |        |                                 |          |
|---------|------|-----------------------------------------------------------------------------------------------|----------------------------------------------------------------------------------------------------------------------------------------|-----------|---------|----|----|----|-------|--------|---------------------------------|----------|
| Control | 6006 | PREDIC TED:<br>similar to<br>Histone<br>H4<br>replacem<br>ent<br>CG3379-<br>PC                | gi 1199157<br>09,gi 11991<br>5719,gi 119<br>915738,gi 7<br>6613952,gi <br>76616306,g<br>i 76631252,<br>gi 7663126<br>2,gi 766317<br>17 | 11,349.70 | 100.00% | 13 | 23 | 83 | 0.90% | 62.10% | TVTAMD 3.92<br>VYALK            | 1,326.70 |
| Control | 6006 | PREDIC TED:<br>similar to<br>Histone<br>H4<br>replacem<br>ent<br>CG3379-<br>PC                | gi 1199157<br>09,gi 11991<br>5719,gi 119<br>915738,gi 7<br>6613952,gi <br>76616306,g<br>i 76631252,<br>gi 7663126<br>2,gi 766317<br>17 | 11,349.70 | 100.00% | 13 | 23 | 83 | 0.90% | 62.10% | TVTAMD 3.35<br>VYALK<br>R       | 1,482.80 |
| Control | 6006 | PREDIC TED:<br>similar to<br>Histone<br>H4<br>replacem<br>ent<br>CG3379-<br>PC                | gi 1199157<br>09,gi 11991<br>5719,gi 119<br>915738,gi 7<br>6613952,gi <br>76616306,g<br>i 76631252,<br>gi 7663126<br>2,gi 766317<br>17 | 11,349.70 | 100.00% | 13 | 23 | 83 | 0.90% | 62.10% | VFLENVI 3.28<br>R               | 989.5778 |
| Control | 6006 | PREDIC TED:<br>similar to<br>Histone<br>H4<br>replacem<br>ent<br>CG3379-<br>PC                | gi 1199157<br>09,gi 11991<br>5719,gi 119<br>915738,gi 7<br>6613952,gi <br>76616306,g<br>i 76631252,<br>gi 7663126<br>2,gi 766317<br>17 | 11,349.70 | 100.00% | 13 | 23 | 83 | 0.90% | 62.10% | VFLENVI 6.18<br>RDAVTY<br>TEHAK | 2,105.10 |
| Control | 6006 | PREDIC TED:<br>similar to<br>Histone<br>H4<br>replacem<br>ent<br>CG3379-<br>PC                | gi 1199157<br>09,gi 11991<br>5719,gi 119<br>915738,gi 7<br>6613952,gi <br>76616306,g<br>i 76631252,<br>gi 7663126<br>2,gi 766317<br>17 | 11,349.70 | 100.00% | 13 | 23 | 83 | 0.90% | 62.10% | VLRDNI 4.47<br>QGITKPA<br>IR    | 1,694.01 |
| Control | 6006 | RecName<br>:<br>Full=Clef<br>t lip and<br>palate<br>transmem<br>brane<br>protein 1<br>homolog | gi 1102789<br>13,gi 11405<br>1439,gi 847<br>08720                                                                                      | 75,864.60 | 100.00% | 3  | 3  | 4  | 0.04% | 4.63%  | ALNTFID 3.57<br>DLFAFVI<br>K    | 1,726.94 |
| Control | 6006 | RecName<br>:<br>Full=Clef<br>t lip and<br>palate<br>transmem<br>brane<br>protein 1<br>homolog | gi 1102789<br>13,gi 11405<br>1439,gi 847<br>08720                                                                                      | 75,864.60 | 100.00% | 3  | 3  | 4  | 0.04% | 4.63%  | NLLTGE 3.43<br>TEADPE<br>MIK    | 1,676.81 |



|         |      |                                                                                    |                      |         |    |    |    |       |        |                                          |      |          |
|---------|------|------------------------------------------------------------------------------------|----------------------|---------|----|----|----|-------|--------|------------------------------------------|------|----------|
| Control | 6006 | RecName gi 1102789 :<br>Full=Clef t lip and palate transmembrane protein 1 homolog | 75,864.60            | 100.00% | 3  | 3  | 4  | 0.04% | 4.63%  | NLLTGE<br>TEADPE<br>MIKR                 | 2.28 | 1,832.91 |
| Control | 6006 | inner membran e protein, mitochondrial                                             | gi 1529412 83,035.60 | 100.00% | 13 | 15 | 16 | 0.17% | 21.00% | ALEHHR<br>SEIQAEQ<br>DR                  | 3.32 | 1,818.88 |
| Control | 6006 | inner membran e protein, mitochondrial                                             | gi 1529412 83,035.60 | 100.00% | 13 | 15 | 16 | 0.17% | 21.00% | ATEKQH<br>IALALEK                        | 2.46 | 1,451.82 |
| Control | 6006 | inner membran e protein, mitochondrial                                             | gi 1529412 83,035.60 | 100.00% | 13 | 15 | 16 | 0.17% | 21.00% | AVDEAA<br>DALLK                          | 2.79 | 1,115.59 |
| Control | 6006 | inner membran e protein, mitochondrial                                             | gi 1529412 83,035.60 | 100.00% | 13 | 15 | 16 | 0.17% | 21.00% | KAVDEA<br>ADALLK                         | 3.2  | 1,243.69 |
| Control | 6006 | inner membran e protein, mitochondrial                                             | gi 1529412 83,035.60 | 100.00% | 13 | 15 | 16 | 0.17% | 21.00% | LAEQEL<br>QFR                            | 2.44 | 1,133.60 |
| Control | 6006 | inner membran e protein, mitochondrial                                             | gi 1529412 83,035.60 | 100.00% | 13 | 15 | 16 | 0.17% | 21.00% | LAQQEK<br>QEQVKI<br>ESLAK                | 5.25 | 1,970.09 |
| Control | 6006 | inner membran e protein, mitochondrial                                             | gi 1529412 83,035.60 | 100.00% | 13 | 15 | 16 | 0.17% | 21.00% | MKTASA<br>DLPTVPL<br>GSAVEAI<br>R        | 2.68 | 2,143.14 |
| Control | 6006 | inner membran e protein, mitochondrial                                             | gi 1529412 83,035.60 | 100.00% | 13 | 15 | 16 | 0.17% | 21.00% | QHIALAL<br>EK                            | 4.55 | 1,022.60 |
| Control | 6006 | inner membran e protein, mitochondrial                                             | gi 1529412 83,035.60 | 100.00% | 13 | 15 | 16 | 0.17% | 21.00% | SVIENAK<br>KEEVAG<br>AK                  | 4.87 | 1,572.86 |
| Control | 6006 | inner membran e protein, mitochondrial                                             | gi 1529412 83,035.60 | 100.00% | 13 | 15 | 16 | 0.17% | 21.00% | TASADL<br>PTVPLGS<br>AVEAIR              | 4.26 | 1,868.01 |
| Control | 6006 | inner membran e protein, mitochondrial                                             | gi 1529412 83,035.60 | 100.00% | 13 | 15 | 16 | 0.17% | 21.00% | TDHPET<br>GEGKPK<br>PATSEEA<br>SSTSVR    | 3.15 | 2,598.23 |
| Control | 6006 | inner membran e protein, mitochondrial                                             | gi 1529412 83,035.60 | 100.00% | 13 | 15 | 16 | 0.17% | 21.00% | VQEQL<br>KYEFEQ<br>DLSEKL<br>AEQLQ<br>FR | 3.44 | 3,256.60 |

|         |      |                                                                                  |                                                                                 |           |         |    |    |    |       |        |                                     |      |          |
|---------|------|----------------------------------------------------------------------------------|---------------------------------------------------------------------------------|-----------|---------|----|----|----|-------|--------|-------------------------------------|------|----------|
| Control | 6006 | inner membran<br>e protein,<br>mitochon<br>drial                                 | gi 1529412<br>06                                                                | 83,035.60 | 100.00% | 13 | 15 | 16 | 0.17% | 21.00% | VVSQYH<br>ELVVQA<br>R               | 4.38 | 1,527.83 |
| Control | 6006 | Mitochon<br>drial<br>carrier<br>homolog<br>2 (C.<br>elegans)                     | gi 1515547<br>06,gi 28603<br>744,gi 5985<br>8227,gi 674<br>61083,gi 79<br>59093 | 33,276.60 | 100.00% | 3  | 5  | 6  | 0.07% | 13.50% | GLFTGL<br>TPR                       | 2.76 | 961.5467 |
| Control | 6006 | Mitochon<br>drial<br>carrier<br>homolog<br>2 (C.<br>elegans)                     | gi 1515547<br>06,gi 28603<br>744,gi 5985<br>8227,gi 674<br>61083,gi 79<br>59093 | 33,276.60 | 100.00% | 3  | 5  | 6  | 0.07% | 13.50% | SAATLIT<br>HPFHVIT<br>LR            | 3.3  | 1,777.01 |
| Control | 6006 | Mitochon<br>drial<br>carrier<br>homolog<br>2 (C.<br>elegans)                     | gi 1515547<br>06,gi 28603<br>744,gi 5985<br>8227,gi 674<br>61083,gi 79<br>59093 | 33,276.60 | 100.00% | 3  | 5  | 6  | 0.07% | 13.50% | VLIQVG<br>YEPLAPT<br>VGR            | 4.43 | 1,711.97 |
| Control | 6006 | PREDIC<br>TED:<br>similar to<br>cytoskele<br>ton-<br>associate<br>d protein<br>4 | gi 1198926<br>86                                                                | 64,511.50 | 100.00% | 33 | 58 | 77 | 0.84% | 54.50% | AAALRP<br>EEDGAF<br>RPSEAFE<br>TLQK | 3.81 | 2,533.27 |
| Control | 6006 | PREDIC<br>TED:<br>similar to<br>cytoskele<br>ton-<br>associate<br>d protein<br>4 | gi 1198926<br>86                                                                | 64,511.50 | 100.00% | 33 | 58 | 77 | 0.84% | 54.50% | AEESAA<br>HLPEEIR                   | 2.97 | 1,451.71 |
| Control | 6006 | PREDIC<br>TED:<br>similar to<br>cytoskele<br>ton-<br>associate<br>d protein<br>4 | gi 1198926<br>86                                                                | 64,511.50 | 100.00% | 33 | 58 | 77 | 0.84% | 54.50% | AEESAA<br>HLPEEIR<br>R              | 2.41 | 1,607.81 |
| Control | 6006 | PREDIC<br>TED:<br>similar to<br>cytoskele<br>ton-<br>associate<br>d protein<br>4 | gi 1198926<br>86                                                                | 64,511.50 | 100.00% | 33 | 58 | 77 | 0.84% | 54.50% | AEESAA<br>HLPEEIR<br>RLEEEL<br>GQLK | 3.66 | 2,647.37 |
| Control | 6006 | PREDIC<br>TED:<br>similar to<br>cytoskele<br>ton-<br>associate<br>d protein<br>4 | gi 1198926<br>86                                                                | 64,511.50 | 100.00% | 33 | 58 | 77 | 0.84% | 54.50% | ALKEVV<br>KEIQTSV<br>K              | 3.8  | 1,571.94 |

|         |      |                                                                |            |           |         |    |    |    |       |        |                                  |      |          |
|---------|------|----------------------------------------------------------------|------------|-----------|---------|----|----|----|-------|--------|----------------------------------|------|----------|
| Control | 6006 | PREDIC TED: 86<br>similar to cytoskeleton-associated protein 4 | gi 1198926 | 64,511.50 | 100.00% | 33 | 58 | 77 | 0.84% | 54.50% | ASVGQV<br>ESDLK                  | 3.63 | 1,132.58 |
| Control | 6006 | PREDIC TED: 86<br>similar to cytoskeleton-associated protein 4 | gi 1198926 | 64,511.50 | 100.00% | 33 | 58 | 77 | 0.84% | 54.50% | ASVGQV<br>ESDLKMLR               | 3.55 | 1,548.81 |
| Control | 6006 | PREDIC TED: 86<br>similar to cytoskeleton-associated protein 4 | gi 1198926 | 64,511.50 | 100.00% | 33 | 58 | 77 | 0.84% | 54.50% | DFTSLEN<br>TVERL<br>TELTK        | 2.44 | 2,125.07 |
| Control | 6006 | PREDIC TED: 86<br>similar to cytoskeleton-associated protein 4 | gi 1198926 | 64,511.50 | 100.00% | 33 | 58 | 77 | 0.84% | 54.50% | DLSDGIH<br>VVK                   | 1.71 | 1,082.58 |
| Control | 6006 | PREDIC TED: 86<br>similar to cytoskeleton-associated protein 4 | gi 1198926 | 64,511.50 | 100.00% | 33 | 58 | 77 | 0.84% | 54.50% | ELVSLK<br>QEQQR                  | 3.93 | 1,357.74 |
| Control | 6006 | PREDIC TED: 86<br>similar to cytoskeleton-associated protein 4 | gi 1198926 | 64,511.50 | 100.00% | 33 | 58 | 77 | 0.84% | 54.50% | ERDFTSL<br>ENTVEE<br>R           | 4.86 | 1,724.81 |
| Control | 6006 | PREDIC TED: 86<br>similar to cytoskeleton-associated protein 4 | gi 1198926 | 64,511.50 | 100.00% | 33 | 58 | 77 | 0.84% | 54.50% | ERDFTSL<br>ENTVEE<br>RLTELT<br>K | 3.02 | 2,410.21 |
| Control | 6006 | PREDIC TED: 86<br>similar to cytoskeleton-associated protein 4 | gi 1198926 | 64,511.50 | 100.00% | 33 | 58 | 77 | 0.84% | 54.50% | EVVKEI<br>QTSVK                  | 3.33 | 1,259.72 |

|         |      |                                                                                  |                  |           |         |    |    |    |       |        |                                                      |      |          |
|---------|------|----------------------------------------------------------------------------------|------------------|-----------|---------|----|----|----|-------|--------|------------------------------------------------------|------|----------|
| Control | 6006 | PREDIC<br>TED:<br>similar to<br>cytoskele<br>ton-<br>associate<br>d protein<br>4 | gi 1198926<br>86 | 64,511.50 | 100.00% | 33 | 58 | 77 | 0.84% | 54.50% | FKEAAD<br>SEHHTL<br>QALTEK                           | 4.24 | 2,055.01 |
| Control | 6006 | PREDIC<br>TED:<br>similar to<br>cytoskele<br>ton-<br>associate<br>d protein<br>4 | gi 1198926<br>86 | 64,511.50 | 100.00% | 33 | 58 | 77 | 0.84% | 54.50% | GLGEAQ<br>LSLAGD<br>VDELKR                           | 3.67 | 1,870.99 |
| Control | 6006 | PREDIC<br>TED:<br>similar to<br>cytoskele<br>ton-<br>associate<br>d protein<br>4 | gi 1198926<br>86 | 64,511.50 | 100.00% | 33 | 58 | 77 | 0.84% | 54.50% | GLLEDL<br>RNLDLR                                     | 1.96 | 1,428.74 |
| Control | 6006 | PREDIC<br>TED:<br>similar to<br>cytoskele<br>ton-<br>associate<br>d protein<br>4 | gi 1198926<br>86 | 64,511.50 | 100.00% | 33 | 58 | 77 | 0.84% | 54.50% | GLLEDL<br>RNLDLR<br>LFVK                             | 2.95 | 1,916.06 |
| Control | 6006 | PREDIC<br>TED:<br>similar to<br>cytoskele<br>ton-<br>associate<br>d protein<br>4 | gi 1198926<br>86 | 64,511.50 | 100.00% | 33 | 58 | 77 | 0.84% | 54.50% | IETNENN<br>LES AK                                    | 2.28 | 1,361.65 |
| Control | 6006 | PREDIC<br>TED:<br>similar to<br>cytoskele<br>ton-<br>associate<br>d protein<br>4 | gi 1198926<br>86 | 64,511.50 | 100.00% | 33 | 58 | 77 | 0.84% | 54.50% | ILRAEES<br>AAHLPE<br>EIR                             | 3.38 | 1,833.98 |
| Control | 6006 | PREDIC<br>TED:<br>similar to<br>cytoskele<br>ton-<br>associate<br>d protein<br>4 | gi 1198926<br>86 | 64,511.50 | 100.00% | 33 | 58 | 77 | 0.84% | 54.50% | KPPPAP<br>QQHPP<br>PAPHPQ<br>QQHPPQ<br>HPQNQA<br>HGK | 2.47 | 3,630.83 |
| Control | 6006 | PREDIC<br>TED:<br>similar to<br>cytoskele<br>ton-<br>associate<br>d protein<br>4 | gi 1198926<br>86 | 64,511.50 | 100.00% | 33 | 58 | 77 | 0.84% | 54.50% | LEEELG<br>QLK                                        | 2.98 | 1,058.57 |

|         |      |                                                                |            |           |         |    |    |    |       |        |                                   |          |
|---------|------|----------------------------------------------------------------|------------|-----------|---------|----|----|----|-------|--------|-----------------------------------|----------|
| Control | 6006 | PREDIC TED: 86<br>similar to cytoskeleton-associated protein 4 | gi 1198926 | 64,511.50 | 100.00% | 33 | 58 | 77 | 0.84% | 54.50% | LQNEILK 4.09<br>DLSDGIH<br>VVK    | 1,921.08 |
| Control | 6006 | PREDIC TED: 86<br>similar to cytoskeleton-associated protein 4 | gi 1198926 | 64,511.50 | 100.00% | 33 | 58 | 77 | 0.84% | 54.50% | LQNEILK 5.16<br>DLSDGIH<br>VVKDAR | 2,263.24 |
| Control | 6006 | PREDIC TED: 86<br>similar to cytoskeleton-associated protein 4 | gi 1198926 | 64,511.50 | 100.00% | 33 | 58 | 77 | 0.84% | 54.50% | LQSVED 4.17<br>GVQAAR             | 1,272.65 |
| Control | 6006 | PREDIC TED: 86<br>similar to cytoskeleton-associated protein 4 | gi 1198926 | 64,511.50 | 100.00% | 33 | 58 | 77 | 0.84% | 54.50% | QREELG 5.54<br>QGLQGV<br>EQK      | 1,698.88 |
| Control | 6006 | PREDIC TED: 86<br>similar to cytoskeleton-associated protein 4 | gi 1198926 | 64,511.50 | 100.00% | 33 | 58 | 77 | 0.84% | 54.50% | RLEEEL 3.24<br>GQLK               | 1,214.67 |
| Control | 6006 | PREDIC TED: 86<br>similar to cytoskeleton-associated protein 4 | gi 1198926 | 64,511.50 | 100.00% | 33 | 58 | 77 | 0.84% | 54.50% | SINDNIAI 3.96<br>FTDVQK           | 1,577.82 |
| Control | 6006 | PREDIC TED: 86<br>similar to cytoskeleton-associated protein 4 | gi 1198926 | 64,511.50 | 100.00% | 33 | 58 | 77 | 0.84% | 54.50% | SINDNIAI 5.06<br>FTDVQK<br>R      | 1,733.92 |
| Control | 6006 | PREDIC TED: 86<br>similar to cytoskeleton-associated protein 4 | gi 1198926 | 64,511.50 | 100.00% | 33 | 58 | 77 | 0.84% | 54.50% | STIQTME 3.31<br>SDVYTE<br>VK      | 1,746.81 |

|         |      |                                                 |                                     |           |         |    |    |    |       |        |                                                    |          |
|---------|------|-------------------------------------------------|-------------------------------------|-----------|---------|----|----|----|-------|--------|----------------------------------------------------|----------|
| Control | 6006 | PREDICTED:<br>similar to cytoskeletal protein 4 | gi 119892686                        | 64,511.50 | 100.00% | 33 | 58 | 77 | 0.84% | 54.50% | STIQTME 4.33<br>SDVYTE<br>VKELVS<br>LKQEQQ<br>R    | 3,085.54 |
| Control | 6006 | PREDICTED:<br>similar to cytoskeletal protein 4 | gi 119892686                        | 64,511.50 | 100.00% | 33 | 58 | 77 | 0.84% | 54.50% | TAVDSL 3.23<br>VAYSVK                              | 1,252.68 |
| Control | 6006 | PREDICTED:<br>similar to cytoskeletal protein 4 | gi 119892686                        | 64,511.50 | 100.00% | 33 | 58 | 77 | 0.84% | 54.50% | VQEQVH 4.07<br>TLLGR                               | 1,279.71 |
| Control | 6006 | PREDICTED:<br>similar to cytoskeletal protein 4 | gi 119892686                        | 64,511.50 | 100.00% | 33 | 58 | 77 | 0.84% | 54.50% | VQSLQA 3.85<br>TFGTFES<br>LVR                      | 1,782.94 |
| Control | 6006 | Prohibition                                     | gi 74354527,gi 77736091,gi 88909243 | 29,786.60 | 100.00% | 10 | 12 | 19 | 0.21% | 46.30% | AATFGLI 3.36<br>LDDVSL<br>THLTFG<br>KEFTEA<br>VEAK | 3,123.63 |
| Control | 6006 | Prohibition                                     | gi 74354527,gi 77736091,gi 88909243 | 29,786.60 | 100.00% | 10 | 12 | 19 | 0.21% | 46.30% | DLQNVN 3.74<br>ITLR                                | 1,185.66 |
| Control | 6006 | Prohibition                                     | gi 74354527,gi 77736091,gi 88909243 | 29,786.60 | 100.00% | 10 | 12 | 19 | 0.21% | 46.30% | FDAGELI 3.4<br>TQR                                 | 1,149.59 |
| Control | 6006 | Prohibition                                     | gi 74354527,gi 77736091,gi 88909243 | 29,786.60 | 100.00% | 10 | 12 | 19 | 0.21% | 46.30% | IFTSIGE 3.75<br>DYDER                              | 1,444.66 |
| Control | 6006 | Prohibition                                     | gi 74354527,gi 77736091,gi 88909243 | 29,786.60 | 100.00% | 10 | 12 | 19 | 0.21% | 46.30% | IFTSIGE 3.58<br>DYDERV<br>LPSITTEI<br>LK           | 2,639.38 |
| Control | 6006 | Prohibition                                     | gi 74354527,gi 77736091,gi 88909243 | 29,786.60 | 100.00% | 10 | 12 | 19 | 0.21% | 46.30% | ILFRPVA 2.6<br>SQLPR                               | 1,396.84 |
| Control | 6006 | Prohibition                                     | gi 74354527,gi 77736091,gi 88909243 | 29,786.60 | 100.00% | 10 | 12 | 19 | 0.21% | 46.30% | KLEAAE 3.21<br>DIAYQLS<br>R                        | 1,606.84 |
| Control | 6006 | Prohibition                                     | gi 74354527,gi 77736091,gi 88909243 | 29,786.60 | 100.00% | 10 | 12 | 19 | 0.21% | 46.30% | NITYLPA 3.44<br>GQSVLL<br>QLPQ                     | 1,855.03 |
| Control | 6006 | Prohibition                                     | gi 74354527,gi 77736091,gi 88909243 | 29,786.60 | 100.00% | 10 | 12 | 19 | 0.21% | 46.30% | NVPVITG 3.75<br>SKDLQN<br>VNITLR                   | 2,081.17 |

|         |      |                                                                      |                                                                                                                                                                                           |           |         |    |    |    |       |        |                                  |          |
|---------|------|----------------------------------------------------------------------|-------------------------------------------------------------------------------------------------------------------------------------------------------------------------------------------|-----------|---------|----|----|----|-------|--------|----------------------------------|----------|
| Control | 6006 | Prohibiti<br>n                                                       | gi 7435452<br>7,gi 777360<br>91,gi 88909<br>243                                                                                                                                           | 29,786.60 | 100.00% | 10 | 12 | 19 | 0.21% | 46.30% | SRNITYL 4.67<br>PAGQSV<br>LLQLPQ | 2,098.17 |
| Control | 6006 | ras-<br>related<br>C3<br>botulinu<br>m toxin<br>substrate<br>1       | gi 2780644<br>3,gi 517027<br>85,gi 60070<br>14,gi 73587<br>375                                                                                                                            | 21,432.60 | 100.00% | 3  | 4  | 4  | 0.04% | 14.10% | KLTPITY 3.06<br>PQGLAM<br>AK     | 1,647.91 |
| Control | 6006 | ras-<br>related<br>C3<br>botulinu<br>m toxin<br>substrate<br>1       | gi 2780644<br>3,gi 517027<br>85,gi 60070<br>14,gi 73587<br>375                                                                                                                            | 21,432.60 | 100.00% | 3  | 4  | 4  | 0.04% | 14.10% | LDLRDD 2.78<br>KDTIEK            | 1,460.76 |
| Control | 6006 | ras-<br>related<br>C3<br>botulinu<br>m toxin<br>substrate<br>1       | gi 2780644<br>3,gi 517027<br>85,gi 60070<br>14,gi 73587<br>375                                                                                                                            | 21,432.60 | 100.00% | 3  | 4  | 4  | 0.04% | 14.10% | LTPITYP 3.42<br>QGLAMA<br>K      | 1,519.82 |
| Control | 6006 | Interferon<br>induced<br>transmem<br>brane<br>protein 1<br>(9-27)    | gi 1123624<br>18,gi 11815<br>1192,gi 118<br>151350,gi 1<br>18151354,g<br>i 11991951<br>3,gi 142795<br>76,gi 14279<br>578,gi 1487<br>44152,gi 32<br>480628,gi 7<br>3586549,gi <br>73587371 | 13,631.00 | 99.80%  | 2  | 3  | 3  | 0.03% | 13.70% | KMVGDI 2.88<br>TGAQSY<br>ASTAK   | 1,743.86 |
| Control | 6006 | Interferon<br>induced<br>transmem<br>brane<br>protein 1<br>(9-27)    | gi 1123624<br>18,gi 11815<br>1192,gi 118<br>151350,gi 1<br>18151354,g<br>i 11991951<br>3,gi 142795<br>76,gi 14279<br>578,gi 1487<br>44152,gi 32<br>480628,gi 7<br>3586549,gi <br>73587371 | 13,631.00 | 99.80%  | 2  | 3  | 3  | 0.03% | 13.70% | MVGDI 4.5<br>GAQSYA<br>STAK      | 1,615.76 |
| Control | 6006 | RecName<br>:<br>Full=Hist<br>one H1.1;<br>AltName:<br>Full=CT<br>L-1 | gi 121903                                                                                                                                                                                 | 10,347.40 | 100.00% | 4  | 4  | 4  | 0.04% | 26.90% | ALAAAG 3.13<br>YDVEK             | 1,107.57 |

|         |      |                                                                                                      |           |         |   |   |   |       |        |                                      |          |
|---------|------|------------------------------------------------------------------------------------------------------|-----------|---------|---|---|---|-------|--------|--------------------------------------|----------|
| Control | 6006 | RecName gi 121903 :<br>Full=Histone H1.1;<br>AltName: Full=CTL-1                                     | 10,347.40 | 100.00% | 4 | 4 | 4 | 0.04% | 26.90% | ALAAAG 3.5<br>YDVEKN<br>NSR          | 1,578.79 |
| Control | 6006 | RecName gi 121903 :<br>Full=Histone H1.1;<br>AltName: Full=CTL-1                                     | 10,347.40 | 100.00% | 4 | 4 | 4 | 0.04% | 26.90% | ASGPPV 2.21<br>SELITK                | 1,198.67 |
| Control | 6006 | RecName gi 121903 :<br>Full=Histone H1.1;<br>AltName: Full=CTL-1                                     | 10,347.40 | 100.00% | 4 | 4 | 4 | 0.04% | 26.90% | KALAAA 4.18<br>GYDVEK<br>NNSR        | 1,706.88 |
| Control | 6006 | GNAS complex locus gi 1139122 07.gi 74268 384                                                        | 45,691.40 | 100.00% | 4 | 4 | 5 | 0.05% | 17.50% | ILHVNGF 3.6<br>NGEGGE<br>EDPQAA<br>R | 2,110.00 |
| Control | 6006 | GNAS complex locus gi 1139122 07.gi 74268 384                                                        | 45,691.40 | 100.00% | 4 | 4 | 5 | 0.05% | 17.50% | LLLLGA 3.48<br>GESGK                 | 1,057.63 |
| Control | 6006 | GNAS complex locus gi 1139122 07.gi 74268 384                                                        | 45,691.40 | 100.00% | 4 | 4 | 5 | 0.05% | 17.50% | SKIEDYF 2.24<br>PEFAR                | 1,501.73 |
| Control | 6006 | GNAS complex locus gi 1139122 07.gi 74268 384                                                        | 45,691.40 | 100.00% | 4 | 4 | 5 | 0.05% | 17.50% | VLTS GIF 2.78<br>ETK                 | 1,094.61 |
| Control | 6006 | GNAS complex locus gi 1139122 07.gi 74268 384                                                        | 45,691.40 | 100.00% | 4 | 4 | 5 | 0.05% | 17.50% | YTTPED 2.31<br>ATPEPG<br>EDPR        | 1,774.78 |
| Control | 6006 | PREDICTED: gi 1946719 15<br>similar to Transmembrane 9 superfamily member 2 precursor (p76), partial | 72,962.00 | 99.80%  | 2 | 3 | 3 | 0.03% | 5.19%  | HTHIDKP 3.61<br>DCSGPP<br>MDISNK     | 2,107.95 |
| Control | 6006 | PREDICTED: gi 1946719 15<br>similar to Transmembrane 9 superfamily member 2 precursor (p76), partial | 72,962.00 | 99.80%  | 2 | 3 | 3 | 0.03% | 5.19%  | IYYHVV 3.5<br>ETGSMG<br>AR           | 1,598.76 |



|         |      |                                                                                                     |                                                                                  |           |        |   |   |   |       |        |                          |      |          |
|---------|------|-----------------------------------------------------------------------------------------------------|----------------------------------------------------------------------------------|-----------|--------|---|---|---|-------|--------|--------------------------|------|----------|
| Control | 6006 | RecName<br>:<br>Full=60S<br>acidic<br>ribosomal<br>protein<br>P0;<br>AltName:<br>Full=L10<br>E      | gi 1089358<br>88,gi 22935<br>77,gi 59858<br>525,gi 6059<br>2767                  | 34,353.40 | 99.80% | 2 | 2 | 2 | 0.02% | 6.92%  | IIQLLDD<br>YPK           | 3.31 | 1,217.68 |
| Control | 6006 | RecName<br>:<br>Full=60S<br>acidic<br>ribosomal<br>protein<br>P0;<br>AltName:<br>Full=L10<br>E      | gi 1089358<br>88,gi 22935<br>77,gi 59858<br>525,gi 6059<br>2767                  | 34,353.40 | 99.80% | 2 | 2 | 2 | 0.02% | 6.92%  | TSFFQAL<br>GITTK         | 3.51 | 1,313.71 |
| Control | 6006 | RPL12<br>protein                                                                                    | gi 1487441<br>91,gi 42564<br>206,gi 4543<br>0019,gi 471<br>17092,gi 74<br>354972 | 17,801.10 | 99.80% | 2 | 2 | 2 | 0.02% | 15.20% | IGPLGLS<br>PK            | 2.32 | 881.5457 |
| Control | 6006 | RPL12<br>protein                                                                                    | gi 1487441<br>91,gi 42564<br>206,gi 4543<br>0019,gi 471<br>17092,gi 74<br>354972 | 17,801.10 | 99.80% | 2 | 2 | 2 | 0.02% | 15.20% | QAQIEV<br>VPSASA<br>LIIK | 3.13 | 1,666.97 |
| Control | 6006 | VAMP<br>(vesicle-<br>associate<br>d<br>membran<br>e protein)-<br>associate<br>d protein<br>A, 33kDa | gi 1113046<br>48,gi 11549<br>6338,gi 121<br>957506                               | 27,838.90 | 99.80% | 2 | 2 | 3 | 0.03% | 11.20% | FKGPFT<br>DVVTTN<br>LK   | 3.88 | 1,566.85 |
| Control | 6006 | VAMP<br>(vesicle-<br>associate<br>d<br>membran<br>e protein)-<br>associate<br>d protein<br>A, 33kDa | gi 1113046<br>48,gi 11549<br>6338,gi 121<br>957506                               | 27,838.90 | 99.80% | 2 | 2 | 3 | 0.03% | 11.20% | GPFTDV<br>VTTNLK         | 3.85 | 1,291.69 |
| Control | 6006 | VAMP<br>(vesicle-<br>associate<br>d<br>membran<br>e protein)-<br>associate<br>d protein<br>A, 33kDa | gi 1113046<br>48,gi 11549<br>6338,gi 121<br>957506                               | 27,838.90 | 99.80% | 2 | 2 | 3 | 0.03% | 11.20% | HEQILVL<br>DPPTDL<br>K   | 3    | 1,617.89 |

|         |      |                                                                                      |            |         |    |    |    |       |        |                                       |          |
|---------|------|--------------------------------------------------------------------------------------|------------|---------|----|----|----|-------|--------|---------------------------------------|----------|
| Control | 6006 | RecName gi 1141492<br>: 56,gi 75773<br>Full=Cate 615,gi 7836<br>nin alpha- 9272<br>1 | 100,117.00 | 100.00% | 15 | 16 | 17 | 0.19% | 26.40% | AIMAQL 2.66<br>PQEQK                  | 1,272.66 |
| Control | 6006 | RecName gi 1141492<br>: 56,gi 75773<br>Full=Cate 615,gi 7836<br>nin alpha- 9272<br>1 | 100,117.00 | 100.00% | 15 | 16 | 17 | 0.19% | 26.40% | ALKPEV 2.71<br>DKLNIM<br>AAK          | 1,656.94 |
| Control | 6006 | RecName gi 1141492<br>: 56,gi 75773<br>Full=Cate 615,gi 7836<br>nin alpha- 9272<br>1 | 100,117.00 | 100.00% | 15 | 16 | 17 | 0.19% | 26.40% | ESQFLKE 4.43<br>ELVAAV<br>EDVRK       | 2,090.11 |
| Control | 6006 | RecName gi 1141492<br>: 56,gi 75773<br>Full=Cate 615,gi 7836<br>nin alpha- 9272<br>1 | 100,117.00 | 100.00% | 15 | 16 | 17 | 0.19% | 26.40% | GKGPLK 2.91<br>NTSDVIS<br>AAK         | 1,585.89 |
| Control | 6006 | RecName gi 1141492<br>: 56,gi 75773<br>Full=Cate 615,gi 7836<br>nin alpha- 9272<br>1 | 100,117.00 | 100.00% | 15 | 16 | 17 | 0.19% | 26.40% | HVNPVQ 3.72<br>ALSEFK<br>AMDSI        | 1,901.94 |
| Control | 6006 | RecName gi 1141492<br>: 56,gi 75773<br>Full=Cate 615,gi 7836<br>nin alpha- 9272<br>1 | 100,117.00 | 100.00% | 15 | 16 | 17 | 0.19% | 26.40% | IAEQVAS 3.84<br>FQEEK                 | 1,378.68 |
| Control | 6006 | RecName gi 1141492<br>: 56,gi 75773<br>Full=Cate 615,gi 7836<br>nin alpha- 9272<br>1 | 100,117.00 | 100.00% | 15 | 16 | 17 | 0.19% | 26.40% | LLEPLVT 3.5<br>QVTTLV<br>NTNSK        | 1,970.12 |
| Control | 6006 | RecName gi 1141492<br>: 56,gi 75773<br>Full=Cate 615,gi 7836<br>nin alpha- 9272<br>1 | 100,117.00 | 100.00% | 15 | 16 | 17 | 0.19% | 26.40% | LLILAD 2.36<br>MADVY<br>K             | 1,380.74 |
| Control | 6006 | RecName gi 1141492<br>: 56,gi 75773<br>Full=Cate 615,gi 7836<br>nin alpha- 9272<br>1 | 100,117.00 | 100.00% | 15 | 16 | 17 | 0.19% | 26.40% | NAGTEQ 3.35<br>DLGIQY<br>K            | 1,436.70 |
| Control | 6006 | RecName gi 1141492<br>: 56,gi 75773<br>Full=Cate 615,gi 7836<br>nin alpha- 9272<br>1 | 100,117.00 | 100.00% | 15 | 16 | 17 | 0.19% | 26.40% | NLMNAV 3.12<br>VQTVK                  | 1,232.67 |
| Control | 6006 | RecName gi 1141492<br>: 56,gi 75773<br>Full=Cate 615,gi 7836<br>nin alpha- 9272<br>1 | 100,117.00 | 100.00% | 15 | 16 | 17 | 0.19% | 26.40% | QALQDL 3.06<br>LSEYMG<br>NAGRK        | 1,909.94 |
| Control | 6006 | RecName gi 1141492<br>: 56,gi 75773<br>Full=Cate 615,gi 7836<br>nin alpha- 9272<br>1 | 100,117.00 | 100.00% | 15 | 16 | 17 | 0.19% | 26.40% | QIIVDPL 2.58<br>SFSEER                | 1,532.80 |
| Control | 6006 | RecName gi 1141492<br>: 56,gi 75773<br>Full=Cate 615,gi 7836<br>nin alpha- 9272<br>1 | 100,117.00 | 100.00% | 15 | 16 | 17 | 0.19% | 26.40% | TSVQTE 2.58<br>DDQLIA<br>GQSAR        | 1,818.88 |
| Control | 6006 | RecName gi 1141492<br>: 56,gi 75773<br>Full=Cate 615,gi 7836<br>nin alpha- 9272<br>1 | 100,117.00 | 100.00% | 15 | 16 | 17 | 0.19% | 26.40% | VIHVVTS 3.76<br>EMDNYE<br>PGVYTE<br>K | 2,326.09 |

|         |      |                                                                                     |                                                    |           |         |    |    |       |        |                                                |                           |          |          |
|---------|------|-------------------------------------------------------------------------------------|----------------------------------------------------|-----------|---------|----|----|-------|--------|------------------------------------------------|---------------------------|----------|----------|
| Control | 6006 | RecName gi 1141492 :<br>56,gi 75773<br>Full=Cate 615,gi 7836<br>nin alpha-9272<br>1 | 100,117.00                                         | 100.00%   | 15      | 16 | 17 | 0.19% | 26.40% | VLTDVAV<br>DDITSID<br>DFLAVS<br>ENHILED<br>VNK | 3.28                      | 3,200.58 |          |
| Control | 6006 | Heat shock<br>70kDa protein 5<br>(glucose-regulated<br>protein,<br>78kDa)           | gi 1113084<br>68,gi 11549<br>5027,gi 152<br>941210 | 72,383.60 | 100.00% | 20 | 32 | 37    | 0.40%  | 33.40%                                         | AKFEEL<br>NMDLFR          | 4.61     | 1,528.75 |
| Control | 6006 | Heat shock<br>70kDa protein 5<br>(glucose-regulated<br>protein,<br>78kDa)           | gi 1113084<br>68,gi 11549<br>5027,gi 152<br>941210 | 72,383.60 | 100.00% | 20 | 32 | 37    | 0.40%  | 33.40%                                         | DAGTIA<br>GLNVMR          | 3.35     | 1,233.63 |
| Control | 6006 | Heat shock<br>70kDa protein 5<br>(glucose-regulated<br>protein,<br>78kDa)           | gi 1113084<br>68,gi 11549<br>5027,gi 152<br>941210 | 72,383.60 | 100.00% | 20 | 32 | 37    | 0.40%  | 33.40%                                         | ELEEIVQ<br>PIISK          | 3.44     | 1,397.79 |
| Control | 6006 | Heat shock<br>70kDa protein 5<br>(glucose-regulated<br>protein,<br>78kDa)           | gi 1113084<br>68,gi 11549<br>5027,gi 152<br>941210 | 72,383.60 | 100.00% | 20 | 32 | 37    | 0.40%  | 33.40%                                         | FEELNM<br>DLFR            | 2.74     | 1,329.61 |
| Control | 6006 | Heat shock<br>70kDa protein 5<br>(glucose-regulated<br>protein,<br>78kDa)           | gi 1113084<br>68,gi 11549<br>5027,gi 152<br>941210 | 72,383.60 | 100.00% | 20 | 32 | 37    | 0.40%  | 33.40%                                         | IDTRNEL<br>ESYAYS<br>LK   | 4.84     | 1,801.90 |
| Control | 6006 | Heat shock<br>70kDa protein 5<br>(glucose-regulated<br>protein,<br>78kDa)           | gi 1113084<br>68,gi 11549<br>5027,gi 152<br>941210 | 72,383.60 | 100.00% | 20 | 32 | 37    | 0.40%  | 33.40%                                         | IINEPTA<br>AAIAYG<br>LDKR | 4.1      | 1,816.00 |
| Control | 6006 | Heat shock<br>70kDa protein 5<br>(glucose-regulated<br>protein,<br>78kDa)           | gi 1113084<br>68,gi 11549<br>5027,gi 152<br>941210 | 72,383.60 | 100.00% | 20 | 32 | 37    | 0.40%  | 33.40%                                         | ITITNDQ<br>NRLTPE<br>EIER | 3.19     | 2,042.05 |
| Control | 6006 | Heat shock<br>70kDa protein 5<br>(glucose-regulated<br>protein,<br>78kDa)           | gi 1113084<br>68,gi 11549<br>5027,gi 152<br>941210 | 72,383.60 | 100.00% | 20 | 32 | 37    | 0.40%  | 33.40%                                         | ITPSYVA<br>FTPEGER        | 3.83     | 1,566.78 |

|         |      |                                                               |                                           |           |         |    |    |    |       |        |                            |      |          |
|---------|------|---------------------------------------------------------------|-------------------------------------------|-----------|---------|----|----|----|-------|--------|----------------------------|------|----------|
| Control | 6006 | Heat shock 70kDa protein 5 (glucose-regulated protein, 78kDa) | gi 1113084.68.gi 11549.5027.gi 152.941210 | 72,383.60 | 100.00% | 20 | 32 | 37 | 0.40% | 33.40% | KKELEEI<br>VQPIISK         | 4.71 | 1,653.98 |
| Control | 6006 | Heat shock 70kDa protein 5 (glucose-regulated protein, 78kDa) | gi 1113084.68.gi 11549.5027.gi 152.941210 | 72,383.60 | 100.00% | 20 | 32 | 37 | 0.40% | 33.40% | KSQIFST<br>ASDNQP<br>TVTIK | 3.8  | 1,965.03 |
| Control | 6006 | Heat shock 70kDa protein 5 (glucose-regulated protein, 78kDa) | gi 1113084.68.gi 11549.5027.gi 152.941210 | 72,383.60 | 100.00% | 20 | 32 | 37 | 0.40% | 33.40% | KVTHAV<br>VTVPAY<br>FNDAQR | 3.09 | 2,016.07 |
| Control | 6006 | Heat shock 70kDa protein 5 (glucose-regulated protein, 78kDa) | gi 1113084.68.gi 11549.5027.gi 152.941210 | 72,383.60 | 100.00% | 20 | 32 | 37 | 0.40% | 33.40% | MVNDAAE<br>KFAEED<br>KK    | 2.8  | 1,669.77 |
| Control | 6006 | Heat shock 70kDa protein 5 (glucose-regulated protein, 78kDa) | gi 1113084.68.gi 11549.5027.gi 152.941210 | 72,383.60 | 100.00% | 20 | 32 | 37 | 0.40% | 33.40% | NELESY<br>AYSLK            | 3.19 | 1,316.64 |
| Control | 6006 | Heat shock 70kDa protein 5 (glucose-regulated protein, 78kDa) | gi 1113084.68.gi 11549.5027.gi 152.941210 | 72,383.60 | 100.00% | 20 | 32 | 37 | 0.40% | 33.40% | NQLTSN<br>PENTVF<br>DAK    | 3.44 | 1,677.81 |
| Control | 6006 | Heat shock 70kDa protein 5 (glucose-regulated protein, 78kDa) | gi 1113084.68.gi 11549.5027.gi 152.941210 | 72,383.60 | 100.00% | 20 | 32 | 37 | 0.40% | 33.40% | NQLTSN<br>PENTVF<br>DAKR   | 2.75 | 1,833.91 |
| Control | 6006 | Heat shock 70kDa protein 5 (glucose-regulated protein, 78kDa) | gi 1113084.68.gi 11549.5027.gi 152.941210 | 72,383.60 | 100.00% | 20 | 32 | 37 | 0.40% | 33.40% | SQIFSTA<br>SDNQPT<br>VTIK  | 4.18 | 1,836.93 |

|         |      |                                                               |                                                                                                              |           |         |    |    |    |       |        |                          |      |          |
|---------|------|---------------------------------------------------------------|--------------------------------------------------------------------------------------------------------------|-----------|---------|----|----|----|-------|--------|--------------------------|------|----------|
| Control | 6006 | Heat shock 70kDa protein 5 (glucose-regulated protein, 78kDa) | gi 1113084 68,gi 11549 5027,gi 152 941210                                                                    | 72,383.60 | 100.00% | 20 | 32 | 37 | 0.40% | 33.40% | TFAPEEI SAMVLT K         | 2.94 | 1,552.79 |
| Control | 6006 | Heat shock 70kDa protein 5 (glucose-regulated protein, 78kDa) | gi 1113084 68,gi 11549 5027,gi 152 941210                                                                    | 72,383.60 | 100.00% | 20 | 32 | 37 | 0.40% | 33.40% | TKPYIQV DVGGGQ TK        | 3.68 | 1,590.85 |
| Control | 6006 | Heat shock 70kDa protein 5 (glucose-regulated protein, 78kDa) | gi 1113084 68,gi 11549 5027,gi 152 941210                                                                    | 72,383.60 | 100.00% | 20 | 32 | 37 | 0.40% | 33.40% | VLESD LKKSDD EIVLVG GSTR | 4.39 | 2,488.31 |
| Control | 6006 | Heat shock 70kDa protein 5 (glucose-regulated protein, 78kDa) | gi 1113084 68,gi 11549 5027,gi 152 941210                                                                    | 72,383.60 | 100.00% | 20 | 32 | 37 | 0.40% | 33.40% | VTHAVV TVPAYF NDAQR      | 3.45 | 1,887.97 |
| Control | 6006 | Junction plakoglobin in                                       | gi 1096581 66,gi 15739 1363,gi 158 065994,gi 2 0336613,gi 211637709, gi 2181030 15,gi 51316 492,gi 5159 1897 | 81,804.10 | 100.00% | 4  | 4  | 4  | 0.04% | 7.52%  | LLNDED PVVVTK            | 3.07 | 1,341.73 |
| Control | 6006 | Junction plakoglobin in                                       | gi 1096581 66,gi 15739 1363,gi 158 065994,gi 2 0336613,gi 211637709, gi 2181030 15,gi 51316 492,gi 5159 1897 | 81,804.10 | 100.00% | 4  | 4  | 4  | 0.04% | 7.52%  | LNTIPLF VQLLYS SVENIQR   | 3.24 | 2,347.30 |
| Control | 6006 | Junction plakoglobin in                                       | gi 1096581 66,gi 15739 1363,gi 158 065994,gi 2 0336613,gi 211637709, gi 2181030 15,gi 51316 492,gi 5159 1897 | 81,804.10 | 100.00% | 4  | 4  | 4  | 0.04% | 7.52%  | LVQLLV K                 | 2.35 | 812.5605 |

|         |      |                                              |                                                                                                                                          |           |         |   |   |   |       |        |                                     |      |          |
|---------|------|----------------------------------------------|------------------------------------------------------------------------------------------------------------------------------------------|-----------|---------|---|---|---|-------|--------|-------------------------------------|------|----------|
| Control | 6006 | Junction<br>plakoglob<br>in                  | gi 1096581<br>66,gi 15739<br>1363,gi 158<br>065994,gi 2<br>0336613,gi <br>211637709,<br>gi 2181030<br>15,gi 51316<br>492,gi 5159<br>1897 | 81,804.10 | 100.00% | 4 | 4 | 4 | 0.04% | 7.52%  | NLSDVA<br>TKQEGL<br>ESVLK           | 2.64 | 1,830.98 |
| Control | 6006 | PREDIC<br>TED:<br>similar to                 | gi 7665118<br>1,gi 766896<br>92                                                                                                          | 14,148.10 | 99.80%  | 2 | 3 | 4 | 0.04% | 35.40% | AGLQFP<br>VGR                       | 3.1  | 944.5313 |
| Control | 6006 | PREDIC<br>TED:<br>similar to                 | gi 7665118<br>1,gi 766896<br>92                                                                                                          | 14,148.10 | 99.80%  | 2 | 3 | 4 | 0.04% | 35.40% | HLQLAIR<br>NDEELN<br>KLLGR          | 4.53 | 2,132.19 |
| Control | 6006 | PREDIC<br>TED:<br>similar to                 | gi 7665118<br>1,gi 766896<br>92                                                                                                          | 14,148.10 | 99.80%  | 2 | 3 | 4 | 0.04% | 35.40% | NDEELN<br>KLLGR                     | 3.2  | 1,300.69 |
| Control | 6006 | PREDIC<br>TED:<br>similar to                 | gi 7665118<br>1,gi 766896<br>92                                                                                                          | 14,148.10 | 99.80%  | 2 | 3 | 4 | 0.04% | 35.40% | VTIAQG<br>GVLPNIQ<br>AVLLPK         | 4.93 | 1,931.17 |
| Control | 6006 | syntaxin<br>7                                | gi 1181508<br>40,gi 12214<br>0829,gi 735<br>86654                                                                                        | 29,638.60 | 99.80%  | 2 | 2 | 2 | 0.02% | 10.70% | EFGSLPT<br>TPSDQR                   | 3.28 | 1,434.69 |
| Control | 6006 | syntaxin<br>7                                | gi 1181508<br>40,gi 12214<br>0829,gi 735<br>86654                                                                                        | 29,638.60 | 99.80%  | 2 | 2 | 2 | 0.02% | 10.70% | TLNQLG<br>TPQDSPE<br>LR             | 3.55 | 1,668.86 |
| Control | 6006 | SEC11<br>homolog<br>A (S.<br>cerevisiae<br>) | gi 1515546<br>19,gi 27806<br>149,gi 5403<br>9632,gi 697<br>9934                                                                          | 20,607.80 | 100.00% | 4 | 4 | 4 | 0.04% | 19.60% | GDLLFL<br>TNRVED<br>PIR             | 3.31 | 1,757.95 |
| Control | 6006 | SEC11<br>homolog<br>A (S.<br>cerevisiae<br>) | gi 1515546<br>19,gi 27806<br>149,gi 5403<br>9632,gi 697<br>9934                                                                          | 20,607.80 | 100.00% | 4 | 4 | 4 | 0.04% | 19.60% | GDLLFL<br>TNRVED<br>PIRVGEI<br>VVFR | 2.42 | 2,657.48 |
| Control | 6006 | SEC11<br>homolog<br>A (S.<br>cerevisiae<br>) | gi 1515546<br>19,gi 27806<br>149,gi 5403<br>9632,gi 697<br>9934                                                                          | 20,607.80 | 100.00% | 4 | 4 | 4 | 0.04% | 19.60% | MLSLDF<br>LDDVRR                    | 1.88 | 1,495.76 |
| Control | 6006 | SEC11<br>homolog<br>A (S.<br>cerevisiae<br>) | gi 1515546<br>19,gi 27806<br>149,gi 5403<br>9632,gi 697<br>9934                                                                          | 20,607.80 | 100.00% | 4 | 4 | 4 | 0.04% | 19.60% | VGEIVVF<br>R                        | 2.83 | 918.5407 |
| Control | 6006 | PREDIC<br>TED:<br>brain<br>protein<br>44     | gi 1198890<br>10,gi 19466<br>5199                                                                                                        | 14,264.40 | 99.80%  | 2 | 3 | 3 | 0.03% | 18.90% | LRPLYN<br>HPAGPR                    | 3.07 | 1,390.77 |
| Control | 6006 | PREDIC<br>TED:<br>brain<br>protein<br>44     | gi 1198890<br>10,gi 19466<br>5199                                                                                                        | 14,264.40 | 99.80%  | 2 | 3 | 3 | 0.03% | 18.90% | VLDKVE<br>LLLPEK                    | 3.57 | 1,395.85 |

|         |      |                                                                                                                                                                                           |                                                   |           |         |   |   |    |       |        |                                         |          |
|---------|------|-------------------------------------------------------------------------------------------------------------------------------------------------------------------------------------------|---------------------------------------------------|-----------|---------|---|---|----|-------|--------|-----------------------------------------|----------|
| Control | 6006 | SLC3A2 protein                                                                                                                                                                            | gi 115304925,gi 164448600,gi 59857795,gi 74354296 | 63,166.50 | 100.00% | 5 | 5 | 7  | 0.08% | 9.44%  | FTGLSKE 3.74<br>ELLK                    | 1,264.71 |
| Control | 6006 | SLC3A2 protein                                                                                                                                                                            | gi 115304925,gi 164448600,gi 59857795,gi 74354296 | 63,166.50 | 100.00% | 5 | 5 | 7  | 0.08% | 9.44%  | LLIAGTD 3.59<br>SSDLQQI<br>LR           | 1,742.97 |
| Control | 6006 | SLC3A2 protein                                                                                                                                                                            | gi 115304925,gi 164448600,gi 59857795,gi 74354296 | 63,166.50 | 100.00% | 5 | 5 | 7  | 0.08% | 9.44%  | SVSEDR 3.58<br>LLIAGTD<br>SSDLQQI<br>LR | 2,416.27 |
| Control | 6006 | SLC3A2 protein                                                                                                                                                                            | gi 115304925,gi 164448600,gi 59857795,gi 74354296 | 63,166.50 | 100.00% | 5 | 5 | 7  | 0.08% | 9.44%  | VDLLLS 3.33<br>TQPGR                    | 1,198.68 |
| Control | 6006 | SLC3A2 protein                                                                                                                                                                            | gi 115304925,gi 164448600,gi 59857795,gi 74354296 | 63,166.50 | 100.00% | 5 | 5 | 7  | 0.08% | 9.44%  | VILDLT 3.31<br>NYK                      | 1,175.67 |
| Control | 6006 | MHC class I antigen                                                                                                                                                                       | gi 84095083                                       | 40,657.50 | 100.00% | 5 | 8 | 12 | 0.13% | 12.60% | DYIALNE 2.47<br>DLR                     | 1,221.61 |
| Control | 6006 | MHC class I antigen                                                                                                                                                                       | gi 84095083                                       | 40,657.50 | 100.00% | 5 | 8 | 12 | 0.13% | 12.60% | FLAVGY 3.99<br>VDDTQF<br>VR             | 1,629.83 |
| Control | 6006 | MHC class I antigen                                                                                                                                                                       | gi 84095083                                       | 40,657.50 | 100.00% | 5 | 8 | 12 | 0.13% | 12.60% | GYRQDA 3.98<br>YDGRDY<br>IALNEDL<br>R   | 2,403.13 |
| Control | 6006 | MHC class I antigen                                                                                                                                                                       | gi 84095083                                       | 40,657.50 | 100.00% | 5 | 8 | 12 | 0.13% | 12.60% | QDAYDG 3.28<br>RDYIAL<br>NEDLR          | 2,026.95 |
| Control | 6006 | MHC class I antigen                                                                                                                                                                       | gi 84095083                                       | 40,657.50 | 100.00% | 5 | 8 | 12 | 0.13% | 12.60% | YLENGK 2.31<br>DTLLR                    | 1,321.71 |
| Control | 6006 | RecName : Full=Serine palmitoyl transferase 1; AltName: Full=Serine-palmitoyl-CoA transferase 1; Short=SP T 1; Short=SP T1; AltName: Full=Long chain base biosynthesis protein 1; Short=L | gi 122139929,gi 75948211,gi 77736443              | 52,771.80 | 100.00% | 3 | 5 | 5  | 0.05% | 7.82%  | ALQGIPG 2.6<br>LK                       | 896.5566 |

|         |      |                                                                                                                                                                                                                                                                                                                      |           |         |   |   |   |       |       |                                 |          |
|---------|------|----------------------------------------------------------------------------------------------------------------------------------------------------------------------------------------------------------------------------------------------------------------------------------------------------------------------|-----------|---------|---|---|---|-------|-------|---------------------------------|----------|
| Control | 6006 | RecName gi 1221399<br>: 29,gi 75948<br>Full=Seri 211,gi 7773<br>ne 6443<br>palmitoyl<br>transferas<br>e 1;<br>AltName:<br>Full=Seri<br>ne-<br>palmitoyl-<br>CoA<br>transferas<br>e 1;<br>Short=SP<br>T 1;<br>Short=SP<br>T1;<br>AltName:<br>Full=Lon<br>g chain<br>base<br>biosynthe<br>sis<br>protein 1;<br>Short=L | 52,771.80 | 100.00% | 3 | 5 | 5 | 0.05% | 7.82% | LLKEQEI 3.47<br>EDQKNP<br>R     | 1,739.93 |
| Control | 6006 | RecName gi 1221399<br>: 29,gi 75948<br>Full=Seri 211,gi 7773<br>ne 6443<br>palmitoyl<br>transferas<br>e 1;<br>AltName:<br>Full=Seri<br>ne-<br>palmitoyl-<br>CoA<br>transferas<br>e 1;<br>Short=SP<br>T 1;<br>Short=SP<br>T1;<br>AltName:<br>Full=Lon<br>g chain<br>base<br>biosynthe<br>sis<br>protein 1;<br>Short=L | 52,771.80 | 100.00% | 3 | 5 | 5 | 0.05% | 7.82% | VVVTVE 3.07<br>QTEEDL<br>EK     | 1,617.82 |
| Control | 6006 | eukaryoti gi 1154979<br>c 00,gi 74353<br>translatio 984,gi 8890<br>n 9609<br>elongatio<br>n factor 2                                                                                                                                                                                                                 | 95,352.20 | 100.00% | 3 | 3 | 3 | 0.03% | 4.90% | ALLELQ 3.07<br>LEPEELY<br>QTFQR | 2,220.15 |
| Control | 6006 | eukaryoti gi 1154979<br>c 00,gi 74353<br>translatio 984,gi 8890<br>n 9609<br>elongatio<br>n factor 2                                                                                                                                                                                                                 | 95,352.20 | 100.00% | 3 | 3 | 3 | 0.03% | 4.90% | VAVEAK 2.9<br>NPADLP<br>K       | 1,351.76 |



|         |      |                                                                   |                                                  |           |         |   |   |   |       |        |                         |      |          |
|---------|------|-------------------------------------------------------------------|--------------------------------------------------|-----------|---------|---|---|---|-------|--------|-------------------------|------|----------|
| Control | 6006 | eukaryotic translation elongation factor 2                        | gi 115497900,gi 74353984,gi 88909609             | 95,352.20 | 100.00% | 3 | 3 | 3 | 0.03% | 4.90%  | VFSGLV<br>STGLK         | 2.7  | 1,107.64 |
| Control | 6006 | PREDICTED: similar to Calpain-5 (nCL-3) (htra-3) isoform 1        | gi 76636134                                      | 72,988.00 | 100.00% | 3 | 3 | 3 | 0.03% | 6.25%  | ANADDL<br>QALHTL<br>HLR | 4.02 | 1,687.89 |
| Control | 6006 | PREDICTED: similar to Calpain-5 (nCL-3) (htra-3) isoform 1        | gi 76636134                                      | 72,988.00 | 100.00% | 3 | 3 | 3 | 0.03% | 6.25%  | NSRQPS<br>DLPGTV<br>AVR | 3.21 | 1,596.85 |
| Control | 6006 | PREDICTED: similar to Calpain-5 (nCL-3) (htra-3) isoform 1        | gi 76636134                                      | 72,988.00 | 100.00% | 3 | 3 | 3 | 0.03% | 6.25%  | VLSSASL<br>TAV          | 2.62 | 947.5407 |
| Control | 6006 | RAB5C, member RAS oncogene family                                 | gi 109659170,gi 61553191,gi 75052596,gi 77736431 | 23,448.70 | 100.00% | 3 | 4 | 5 | 0.05% | 18.10% | LVLLGE<br>SAVGK         | 3.56 | 1,085.66 |
| Control | 6006 | RAB5C, member RAS oncogene family                                 | gi 109659170,gi 61553191,gi 75052596,gi 77736431 | 23,448.70 | 100.00% | 3 | 4 | 5 | 0.05% | 18.10% | NRGVDL<br>QENNPA<br>SR  | 4.62 | 1,569.77 |
| Control | 6006 | RAB5C, member RAS oncogene family                                 | gi 109659170,gi 61553191,gi 75052596,gi 77736431 | 23,448.70 | 100.00% | 3 | 4 | 5 | 0.05% | 18.10% | QASPNIV<br>IALAGN<br>K  | 2.54 | 1,395.80 |
| Control | 6006 | PREDICTED: similar to RAB6A, member RAS oncogene family isoform 2 | gi 119907595,gi 119907597                        | 23,545.30 | 100.00% | 5 | 6 | 9 | 0.10% | 23.10% | AKELNV<br>MFIETSA<br>K  | 3.2  | 1,596.83 |
| Control | 6006 | PREDICTED: similar to RAB6A, member RAS oncogene family isoform 2 | gi 119907595,gi 119907597                        | 23,545.30 | 100.00% | 5 | 6 | 9 | 0.10% | 23.10% | ELNVMF<br>IETSAK        | 2.91 | 1,397.70 |

|         |      |                                                                                                                    |                              |   |   |    |       |        |                                              |          |
|---------|------|--------------------------------------------------------------------------------------------------------------------|------------------------------|---|---|----|-------|--------|----------------------------------------------|----------|
| Control | 6006 | PREDIC TED: gi 1199075 23,545.30 100.00% 5 6 9 0.10% 23.10% similar to RAB6A, member RAS oncogene family isoform 2 | gi 1199075 23,545.30 100.00% | 5 | 6 | 9  | 0.10% | 23.10% | GSDVIIM 3.16<br>LVGNKT<br>DLADKR             | 2,061.10 |
| Control | 6006 | PREDIC TED: gi 1199075 23,545.30 100.00% 5 6 9 0.10% 23.10% similar to RAB6A, member RAS oncogene family isoform 2 | gi 1199075 23,545.30 100.00% | 5 | 6 | 9  | 0.10% | 23.10% | RVAAAL 3.35<br>PGMEST<br>QDR                 | 1,617.80 |
| Control | 6006 | PREDIC TED: gi 1199075 23,545.30 100.00% 5 6 9 0.10% 23.10% similar to RAB6A, member RAS oncogene family isoform 2 | gi 1199075 23,545.30 100.00% | 5 | 6 | 9  | 0.10% | 23.10% | VAAALP 2.83<br>GMESTQ<br>DR                  | 1,461.70 |
| Control | 6006 | PREDIC TED: gi 1946763 41,854.80 99.80% 2 6 12 0.13% 28.50% similar to Actin, cytoplas mic 2 (Beta-actin-2)        | gi 1946763 41,854.80 99.80%  | 2 | 6 | 12 | 0.13% | 28.50% | DLTDYL 1.83<br>MK                            | 1,014.48 |
| Control | 6006 | PREDIC TED: gi 1946763 41,854.80 99.80% 2 6 12 0.13% 28.50% similar to Actin, cytoplas mic 2 (Beta-actin-2)        | gi 1946763 41,854.80 99.80%  | 2 | 6 | 12 | 0.13% | 28.50% | GYSFTT 2.75<br>TAER                          | 1,132.53 |
| Control | 6006 | PREDIC TED: gi 1946763 41,854.80 99.80% 2 6 12 0.13% 28.50% similar to Actin, cytoplas mic 2 (Beta-actin-2)        | gi 1946763 41,854.80 99.80%  | 2 | 6 | 12 | 0.13% | 28.50% | GYSFTT 2.92<br>TAEREIV<br>R                  | 1,629.82 |
| Control | 6006 | PREDIC TED: gi 1946763 41,854.80 99.80% 2 6 12 0.13% 28.50% similar to Actin, cytoplas mic 2 (Beta-actin-2)        | gi 1946763 41,854.80 99.80%  | 2 | 6 | 12 | 0.13% | 28.50% | HQGVM 3.73<br>VGMGQ<br>KDCYVG<br>DEAQSK      | 2,383.05 |
| Control | 6006 | PREDIC TED: gi 1946763 41,854.80 99.80% 2 6 12 0.13% 28.50% similar to Actin, cytoplas mic 2 (Beta-actin-2)        | gi 1946763 41,854.80 99.80%  | 2 | 6 | 12 | 0.13% | 28.50% | HQGVM 4.32<br>VGMGQ<br>KDCYVG<br>DEAQSK<br>R | 2,539.15 |

|         |      |                                                                       |                                      |            |         |   |    |    |       |        |                                                     |          |
|---------|------|-----------------------------------------------------------------------|--------------------------------------|------------|---------|---|----|----|-------|--------|-----------------------------------------------------|----------|
| Control | 6006 | PREDICTED:<br>similar to<br>Actin,<br>cytoplasmic 2<br>(Beta-actin-2) | gi 194676388                         | 41,854.80  | 99.80%  | 2 | 6  | 12 | 0.13% | 28.50% | IKIAPPE 2.6<br>R                                    | 1,036.65 |
| Control | 6006 | PREDICTED:<br>similar to<br>Actin,<br>cytoplasmic 2<br>(Beta-actin-2) | gi 194676388                         | 41,854.80  | 99.80%  | 2 | 6  | 12 | 0.13% | 28.50% | IKIAPPE 2.61<br>RK                                  | 1,164.75 |
| Control | 6006 | PREDICTED:<br>similar to<br>Actin,<br>cytoplasmic 2<br>(Beta-actin-2) | gi 194676388                         | 41,854.80  | 99.80%  | 2 | 6  | 12 | 0.13% | 28.50% | LDLAGR 3.38<br>DLTDYL<br>MK                         | 1,639.84 |
| Control | 6006 | PREDICTED:<br>similar to<br>Actin,<br>cytoplasmic 2<br>(Beta-actin-2) | gi 194676388                         | 41,854.80  | 99.80%  | 2 | 6  | 12 | 0.13% | 28.50% | SYELPD 4.74<br>GQVITIG<br>NER                       | 1,790.89 |
| Control | 6006 | PREDICTED:<br>similar to<br>Actin,<br>cytoplasmic 2<br>(Beta-actin-2) | gi 194676388                         | 41,854.80  | 99.80%  | 2 | 6  | 12 | 0.13% | 28.50% | TTGIVM 6.26<br>DSGDGV<br>THTVPIY<br>EGYALP<br>HAILR | 3,199.61 |
| Control | 6006 | RecName :<br>Full=Coiled-coil domain-<br>containin<br>g protein<br>56 | gi 108935963,gi 74268043,gi 77736311 | 11,689.70  | 99.80%  | 2 | 2  | 2  | 0.02% | 18.90% | FLDELE 3.43<br>DEAK                                 | 1,208.57 |
| Control | 6006 | RecName :<br>Full=Coiled-coil domain-<br>containin<br>g protein<br>56 | gi 108935963,gi 74268043,gi 77736311 | 11,689.70  | 99.80%  | 2 | 2  | 2  | 0.02% | 18.90% | LTPAQL 2.48<br>QFMR                                 | 1,220.65 |
| Control | 6006 | Hexokinase 1                                                          | gi 154426122,gi 33332343,gi 60592784 | 102,191.60 | 100.00% | 9 | 12 | 12 | 0.13% | 13.60% | FKASGV 4.25<br>EGTDVV<br>K                          | 1,336.71 |
| Control | 6006 | Hexokinase 1                                                          | gi 154426122,gi 33332343,gi 60592784 | 102,191.60 | 100.00% | 9 | 12 | 12 | 0.13% | 13.60% | GKFNTS 3.62<br>DVSAIEK                              | 1,395.71 |
| Control | 6006 | Hexokinase 1                                                          | gi 154426122,gi 33332343,gi 60592784 | 102,191.60 | 100.00% | 9 | 12 | 12 | 0.13% | 13.60% | KIDKYL 2.92<br>YAMR                                 | 1,316.70 |

|         |      |                                                                                         |                                                  |            |         |   |    |    |       |        |                                          |          |
|---------|------|-----------------------------------------------------------------------------------------|--------------------------------------------------|------------|---------|---|----|----|-------|--------|------------------------------------------|----------|
| Control | 6006 | Hexokina<br>se 1                                                                        | gi 1544261<br>22,gi 33332<br>343,gi 6059<br>2784 | 102,191.60 | 100.00% | 9 | 12 | 12 | 0.13% | 13.60% | LSDETL 3.3<br>DIMNR                      | 1,435.71 |
| Control | 6006 | Hexokina<br>se 1                                                                        | gi 1544261<br>22,gi 33332<br>343,gi 6059<br>2784 | 102,191.60 | 100.00% | 9 | 12 | 12 | 0.13% | 13.60% | QIEETLA 3<br>HFSLTK                      | 1,516.80 |
| Control | 6006 | Hexokina<br>se 1                                                                        | gi 1544261<br>22,gi 33332<br>343,gi 6059<br>2784 | 102,191.60 | 100.00% | 9 | 12 | 12 | 0.13% | 13.60% | SANLVA 3.92<br>ATLGAIL<br>SR             | 1,456.85 |
| Control | 6006 | Hexokina<br>se 1                                                                        | gi 1544261<br>22,gi 33332<br>343,gi 6059<br>2784 | 102,191.60 | 100.00% | 9 | 12 | 12 | 0.13% | 13.60% | SIPDGSE 3.26<br>KGDFIAL<br>DLGGSS<br>FR  | 2,268.11 |
| Control | 6006 | Hexokina<br>se 1                                                                        | gi 1544261<br>22,gi 33332<br>343,gi 6059<br>2784 | 102,191.60 | 100.00% | 9 | 12 | 12 | 0.13% | 13.60% | TTVGVD 2.56<br>GSLYK                     | 1,139.59 |
| Control | 6006 | Hexokina<br>se 1                                                                        | gi 1544261<br>22,gi 33332<br>343,gi 6059<br>2784 | 102,191.60 | 100.00% | 9 | 12 | 12 | 0.13% | 13.60% | YLSQIES 3.32<br>DRLALL<br>QVR            | 1,904.06 |
| Control | 6006 | RecName<br>:<br>Full=Cad<br>herin-13;<br>Flags:<br>Precursor                            | gi 1108327<br>87,gi 77567<br>834,gi 7836<br>9244 | 78,179.40  | 100.00% | 4 | 6  | 6  | 0.07% | 9.12%  | DIQGLQ 2.95<br>DIFK                      | 1,263.66 |
| Control | 6006 | RecName<br>:<br>Full=Cad<br>herin-13;<br>Flags:<br>Precursor                            | gi 1108327<br>87,gi 77567<br>834,gi 7836<br>9244 | 78,179.40  | 100.00% | 4 | 6  | 6  | 0.07% | 9.12%  | MTAFDA 2.64<br>DDPATD<br>NALLR           | 1,852.84 |
| Control | 6006 | RecName<br>:<br>Full=Cad<br>herin-13;<br>Flags:<br>Precursor                            | gi 1108327<br>87,gi 77567<br>834,gi 7836<br>9244 | 78,179.40  | 100.00% | 4 | 6  | 6  | 0.07% | 9.12%  | SIVVSPIL 3.15<br>IPENQR                  | 1,564.91 |
| Control | 6006 | RecName<br>:<br>Full=Cad<br>herin-13;<br>Flags:<br>Precursor                            | gi 1108327<br>87,gi 77567<br>834,gi 7836<br>9244 | 78,179.40  | 100.00% | 4 | 6  | 6  | 0.07% | 9.12%  | TLEGPV 4.29<br>PLEVIVI<br>DQNDNR<br>PIFR | 2,634.43 |
| Control | 6006 | EGF,<br>latrophili<br>n and<br>seven<br>transmem<br>brane<br>domain<br>containin<br>g 1 | gi 1153051<br>44,gi 11600<br>4035                | 77,458.50  | 99.80%  | 2 | 2  | 2  | 0.02% | 3.34%  | IRHIEEP 3.75<br>VALLR                    | 1,445.86 |
| Control | 6006 | EGF,<br>latrophili<br>n and<br>seven<br>transmem<br>brane<br>domain<br>containin<br>g 1 | gi 1153051<br>44,gi 11600<br>4035                | 77,458.50  | 99.80%  | 2 | 2  | 2  | 0.02% | 3.34%  | LIHTAEQ 3.4<br>ATLR                      | 1,252.70 |

|         |      |                                                                                                                                                                                             |                                                    |           |         |   |   |   |       |        |                           |      |          |
|---------|------|---------------------------------------------------------------------------------------------------------------------------------------------------------------------------------------------|----------------------------------------------------|-----------|---------|---|---|---|-------|--------|---------------------------|------|----------|
| Control | 6006 | PREDICTED:<br>similar to<br>ER<br>lumen<br>protein<br>retaining<br>receptor<br>3 (KDEL<br>receptor<br>3)<br>(KDEL<br>endoplas<br>mic<br>reticulum<br>protein<br>retention<br>receptor<br>3) | gi 1198932<br>24                                   | 24,969.50 | 99.80%  | 2 | 2 | 2 | 0.02% | 11.20% | ILGDLSH<br>LLAMILL<br>LGK | 3.73 | 1,836.10 |
| Control | 6006 | PREDICTED:<br>similar to<br>ER<br>lumen<br>protein<br>retaining<br>receptor<br>3 (KDEL<br>receptor<br>3)<br>(KDEL<br>endoplas<br>mic<br>reticulum<br>protein<br>retention<br>receptor<br>3) | gi 1198932<br>24                                   | 24,969.50 | 99.80%  | 2 | 2 | 2 | 0.02% | 11.20% | LSLPMPI                   | 1.81 | 786.4432 |
| Control | 6006 | RecName:<br>Full=Cadherin-2;<br>AltName:<br>Full=Neural<br>cadherin;<br>Short=N-cadherin;<br>AltName:<br>CD_antigen=CD32<br>5; Flags:<br>Precursor                                          | gi 115421,gi 19467806<br>i 19467806<br>8,gi 664894 | 96,830.40 | 100.00% | 5 | 7 | 7 | 0.08% | 10.40% | GPPFQEL<br>VR             | 2.36 | 1,042.57 |

|         |      |                                                                                                                                                                        |                                          |           |         |   |   |   |       |        |                                 |          |
|---------|------|------------------------------------------------------------------------------------------------------------------------------------------------------------------------|------------------------------------------|-----------|---------|---|---|---|-------|--------|---------------------------------|----------|
| Control | 6006 | RecName<br>:<br>Full=Cad<br>herin-2;<br>AltName:<br>Full=Neu<br>ral<br>cadherin;<br>Short=N-<br>cadherin;<br>AltName:<br>CD_antig<br>en=CD32<br>5; Flags:<br>Precursor | gi 115421,g<br>i 19467806<br>8,gi 664894 | 96,830.40 | 100.00% | 5 | 7 | 7 | 0.08% | 10.40% | LDERPIH 2.43<br>AEPQYP<br>VR    | 1,819.95 |
| Control | 6006 | RecName<br>:<br>Full=Cad<br>herin-2;<br>AltName:<br>Full=Neu<br>ral<br>cadherin;<br>Short=N-<br>cadherin;<br>AltName:<br>CD_antig<br>en=CD32<br>5; Flags:<br>Precursor | gi 115421,g<br>i 19467806<br>8,gi 664894 | 96,830.40 | 100.00% | 5 | 7 | 7 | 0.08% | 10.40% | MYVLTV 3.27<br>AAENQV<br>PLAK   | 1,762.94 |
| Control | 6006 | RecName<br>:<br>Full=Cad<br>herin-2;<br>AltName:<br>Full=Neu<br>ral<br>cadherin;<br>Short=N-<br>cadherin;<br>AltName:<br>CD_antig<br>en=CD32<br>5; Flags:<br>Precursor | gi 115421,g<br>i 19467806<br>8,gi 664894 | 96,830.40 | 100.00% | 5 | 7 | 7 | 0.08% | 10.40% | SAAPHP 4.18<br>GDIGDFI<br>NEGLK | 1,837.91 |



|         |      |                                                                                                                                                                                                      |                                                                                                               |           |         |   |   |   |       |        |                                                                      |          |
|---------|------|------------------------------------------------------------------------------------------------------------------------------------------------------------------------------------------------------|---------------------------------------------------------------------------------------------------------------|-----------|---------|---|---|---|-------|--------|----------------------------------------------------------------------|----------|
| Control | 6006 | RecName : Full=Cytochrome c1, heme protein, mitochondrial; AltName: Full=Ubiquinol-cytochrome-c reductase complex cytochrome c1 subunit; Short=Cytochrome c-1; AltName: Full=Cytochrome b-c1 complex | gi 109940069,gi 114793904,gi 71042588,gi 75765182,gi 75765193,gi 82407279,gi 82407290,gi 83638779,gi 84000289 | 27,269.70 | 99.80%  | 2 | 3 | 5 | 0.05% | 14.90% | MGLKM 2.67<br>LLMMGL<br>LLPLVY<br>AMK                                | 2,266.26 |
| Control | 6006 | F1-F0-ATPase                                                                                                                                                                                         | gi 162701,gi 231615,gi 28603752,gi 74268301                                                                   | 8,303.10  | 100.00% | 4 | 5 | 7 | 0.08% | 40.80% | ELAEAQ 3.42<br>EDTILK                                                | 1,359.70 |
| Control | 6006 | F1-F0-ATPase                                                                                                                                                                                         | gi 162701,gi 231615,gi 28603752,gi 74268301                                                                   | 8,303.10  | 100.00% | 4 | 5 | 7 | 0.08% | 40.80% | IERELAE 5.39<br>AQEDTILK                                             | 1,757.93 |
| Control | 6006 | F1-F0-ATPase                                                                                                                                                                                         | gi 162701,gi 231615,gi 28603752,gi 74268301                                                                   | 8,303.10  | 100.00% | 4 | 5 | 7 | 0.08% | 40.80% | YSALFL 4.56<br>GMAYG<br>AK                                           | 1,407.70 |
| Control | 6006 | F1-F0-ATPase                                                                                                                                                                                         | gi 162701,gi 231615,gi 28603752,gi 74268301                                                                   | 8,303.10  | 100.00% | 4 | 5 | 7 | 0.08% | 40.80% | YSALFL 1.96<br>GMAYG<br>AKR                                          | 1,563.80 |
| Control | 6006 | P4HB protein                                                                                                                                                                                         | gi 148878430,gi 152941196                                                                                     | 57,187.70 | 100.00% | 9 | 9 | 9 | 0.10% | 28.00% | FDEGRN 3.37<br>NFEGEV<br>TK                                          | 1,641.75 |
| Control | 6006 | P4HB protein                                                                                                                                                                                         | gi 148878430,gi 152941196                                                                                     | 57,187.70 | 100.00% | 9 | 9 | 9 | 0.10% | 28.00% | FDEGRN 3.25<br>NFEGEV<br>TKEK                                        | 1,898.89 |
| Control | 6006 | P4HB protein                                                                                                                                                                                         | gi 148878430,gi 152941196                                                                                     | 57,187.70 | 100.00% | 9 | 9 | 9 | 0.10% | 28.00% | FLESGG 4.6<br>QDGAGD<br>DDDLED<br>LEEAEPP<br>DLEEDD<br>DQKAVK<br>DEL | 4,394.84 |
| Control | 6006 | P4HB protein                                                                                                                                                                                         | gi 148878430,gi 152941196                                                                                     | 57,187.70 | 100.00% | 9 | 9 | 9 | 0.10% | 28.00% | HNQLPL 3.36<br>VIEFTEQ<br>TAPK                                       | 1,965.04 |
| Control | 6006 | P4HB protein                                                                                                                                                                                         | gi 148878430,gi 152941196                                                                                     | 57,187.70 | 100.00% | 9 | 9 | 9 | 0.10% | 28.00% | LITLEEE 2.43<br>MTK                                                  | 1,222.62 |
| Control | 6006 | P4HB protein                                                                                                                                                                                         | gi 148878430,gi 152941196                                                                                     | 57,187.70 | 100.00% | 9 | 9 | 9 | 0.10% | 28.00% | MDSTAN 2.29<br>EVEAVK<br>VHSFPTL<br>K                                | 2,219.10 |



|         |      |                                                                    |                                       |            |         |   |   |   |       |        |                          |      |          |
|---------|------|--------------------------------------------------------------------|---------------------------------------|------------|---------|---|---|---|-------|--------|--------------------------|------|----------|
| Control | 6006 | P4HB protein                                                       | gi 148878430,gi 152941196             | 57,187.70  | 100.00% | 9 | 9 | 9 | 0.10% | 28.00% | NFEEVA<br>FDEKK          | 3.5  | 1,355.65 |
| Control | 6006 | P4HB protein                                                       | gi 148878430,gi 152941196             | 57,187.70  | 100.00% | 9 | 9 | 9 | 0.10% | 28.00% | VDATEE<br>SDLAQQ<br>YGVR | 2.91 | 1,780.83 |
| Control | 6006 | P4HB protein                                                       | gi 148878430,gi 152941196             | 57,187.70  | 100.00% | 9 | 9 | 9 | 0.10% | 28.00% | YQLDKD<br>GVVLFK<br>K    | 3.18 | 1,552.87 |
| Control | 6006 | RecName : Full=Ras-related protein Rab-11B                         | gi 108860922,gi 75773827,gi 78369332  | 24,471.00  | 100.00% | 5 | 6 | 7 | 0.08% | 24.30% | FTRNEF<br>NLESK          | 3.4  | 1,384.69 |
| Control | 6006 | RecName : Full=Ras-related protein Rab-11B                         | gi 108860922,gi 75773827,gi 78369332  | 24,471.00  | 100.00% | 5 | 6 | 7 | 0.08% | 24.30% | GAVGAL<br>LVYDIA<br>K    | 3.07 | 1,289.75 |
| Control | 6006 | RecName : Full=Ras-related protein Rab-11B                         | gi 108860922,gi 75773827,gi 78369332  | 24,471.00  | 100.00% | 5 | 6 | 7 | 0.08% | 24.30% | NILTEIY<br>R             | 2.23 | 1,021.57 |
| Control | 6006 | RecName : Full=Ras-related protein Rab-11B                         | gi 108860922,gi 75773827,gi 78369332  | 24,471.00  | 100.00% | 5 | 6 | 7 | 0.08% | 24.30% | STIGVEF<br>ATR           | 2.66 | 1,080.57 |
| Control | 6006 | RecName : Full=Ras-related protein Rab-11B                         | gi 108860922,gi 75773827,gi 78369332  | 24,471.00  | 100.00% | 5 | 6 | 7 | 0.08% | 24.30% | VVLIGDS<br>GVGK          | 1.97 | 1,043.61 |
| Control | 6006 | PREDIC TED: ATP-binding cassette, sub-family B (MDR/TAP), member 1 | gi 194685301                          | 144,522.00 | 99.80%  | 2 | 2 | 2 | 0.02% | 2.05%  | IKEHGT<br>HQQLLA<br>QK   | 2.66 | 1,630.90 |
| Control | 6006 | PREDIC TED: ATP-binding cassette, sub-family B (MDR/TAP), member 1 | gi 194685301                          | 144,522.00 | 99.80%  | 2 | 2 | 2 | 0.02% | 2.05%  | YGREDV<br>TMDEIQ<br>K    | 4.01 | 1,599.73 |
| Control | 6006 | AFG3 ATPase family gene 3-like 2                                   | gi 114051125,gi 118572819,gi 86820707 | 89,372.80  | 99.80%  | 2 | 2 | 2 | 0.02% | 3.85%  | GMGGLF<br>SVGETT<br>AK   | 3.21 | 1,370.66 |

|         |      |                                                                                                                                               |                                                                                                                                                                           |           |         |   |   |   |       |        |                                                |      |          |
|---------|------|-----------------------------------------------------------------------------------------------------------------------------------------------|---------------------------------------------------------------------------------------------------------------------------------------------------------------------------|-----------|---------|---|---|---|-------|--------|------------------------------------------------|------|----------|
| Control | 6006 | AFG3<br>ATPase<br>family<br>gene 3-<br>like 2                                                                                                 | gi 1140511<br>25,gi 11857<br>2819,gi 868<br>20707                                                                                                                         | 89,372.80 | 99.80%  | 2 | 2 | 2 | 0.02% | 3.85%  | VTQSAY<br>AQIVQF<br>GMNEK                      | 3.51 | 1,929.94 |
| Control | 6006 | ATP<br>synthase,<br>H+<br>transporti<br>ng,<br>mitochon<br>drial F1<br>complex,<br>gamma<br>polypepti<br>de 1                                 | gi 1154954<br>11,gi 15842<br>8988,gi 158<br>428995,gi 1<br>58429005,g<br>i 15842901<br>2,gi 158429<br>019,gi 1584<br>29026,gi 15<br>8431072,gi <br>543874,gi 7<br>4268047 | 30,124.50 | 99.80%  | 2 | 2 | 2 | 0.02% | 15.40% | TEEKPIF<br>SLDTISS<br>AESMSIY<br>DDIDAD<br>VLR | 6    | 3,376.60 |
| Control | 6006 | ATP<br>synthase,<br>H+<br>transporti<br>ng,<br>mitochon<br>drial F1<br>complex,<br>gamma<br>polypepti<br>de 1                                 | gi 1154954<br>11,gi 15842<br>8988,gi 158<br>428995,gi 1<br>58429005,g<br>i 15842901<br>2,gi 158429<br>019,gi 1584<br>29026,gi 15<br>8431072,gi <br>543874,gi 7<br>4268047 | 30,124.50 | 99.80%  | 2 | 2 | 2 | 0.02% | 15.40% | VYGVGS<br>LALYEK                               | 3.13 | 1,298.70 |
| Control | 6006 | transgelin<br>2                                                                                                                               | gi 5985829<br>5,gi 618888<br>74,gi 73919<br>851                                                                                                                           | 22,408.90 | 100.00% | 4 | 4 | 4 | 0.04% | 24.10% | QMEQIS<br>QFLQAA<br>ER                         | 2.73 | 1,694.82 |
| Control | 6006 | transgelin<br>2                                                                                                                               | gi 5985829<br>5,gi 618888<br>74,gi 73919<br>851                                                                                                                           | 22,408.90 | 100.00% | 4 | 4 | 4 | 0.04% | 24.10% | TLMNLG<br>GLAVAR                               | 2.97 | 1,231.68 |
| Control | 6006 | transgelin<br>2                                                                                                                               | gi 5985829<br>5,gi 618888<br>74,gi 73919<br>851                                                                                                                           | 22,408.90 | 100.00% | 4 | 4 | 4 | 0.04% | 24.10% | YFSDNQ<br>LQEGK                                | 3.69 | 1,328.61 |
| Control | 6006 | transgelin<br>2                                                                                                                               | gi 5985829<br>5,gi 618888<br>74,gi 73919<br>851                                                                                                                           | 22,408.90 | 100.00% | 4 | 4 | 4 | 0.04% | 24.10% | YFSDNQ<br>LQEGKN<br>VIGLQM<br>GTNR             | 4.51 | 2,528.22 |
| Control | 6006 | PREDIC<br>TED:<br>similar to<br>Heparan<br>sulfate 2-<br>O-<br>sulfotrans<br>ferase 1<br>(2-O-<br>sulfotrans<br>ferase)<br>(2OST),<br>partial | gi 1198899<br>09                                                                                                                                                          | 37,063.70 | 100.00% | 3 | 3 | 3 | 0.03% | 12.10% | EKDGD<br>DL<br>YILAQNF<br>FYEK                 | 4.25 | 2,093.02 |

|         |      |                                                                                                            |                          |           |         |   |   |   |       |        |                    |      |          |
|---------|------|------------------------------------------------------------------------------------------------------------|--------------------------|-----------|---------|---|---|---|-------|--------|--------------------|------|----------|
| Control | 6006 | PREDIC TED: 09<br>similar to Heparan sulfate 2-O-sulfotransferase 1 (2-O-sulfotransferase) (2OST), partial | gi 1198899               | 37,063.70 | 100.00% | 3 | 3 | 3 | 0.03% | 12.10% | LVSYYY FLR         | 2.48 | 1,223.65 |
| Control | 6006 | PREDIC TED: 09<br>similar to Heparan sulfate 2-O-sulfotransferase 1 (2-O-sulfotransferase) (2OST), partial | gi 1198899               | 37,063.70 | 100.00% | 3 | 3 | 3 | 0.03% | 12.10% | NNPVMS LQDQVR      | 3.23 | 1,416.69 |
| Control | 6006 | PREDIC TED: 52<br>similar to transferri n receptor                                                         | gi 1198796               | 85,420.40 | 100.00% | 6 | 8 | 8 | 0.09% | 7.93%  | AFTYINL DK         | 1.97 | 1,084.57 |
| Control | 6006 | PREDIC TED: 52<br>similar to transferri n receptor                                                         | gi 1198796               | 85,420.40 | 100.00% | 6 | 8 | 8 | 0.09% | 7.93%  | FVKEMN LFR         | 2.64 | 1,199.62 |
| Control | 6006 | PREDIC TED: 52<br>similar to transferri n receptor                                                         | gi 1198796               | 85,420.40 | 100.00% | 6 | 8 | 8 | 0.09% | 7.93%  | IMKVEY HLLSPY VSPR | 3.86 | 1,948.04 |
| Control | 6006 | PREDIC TED: 52<br>similar to transferri n receptor                                                         | gi 1198796               | 85,420.40 | 100.00% | 6 | 8 | 8 | 0.09% | 7.93%  | LAADEE ENVDSN MR   | 2.58 | 1,608.68 |
| Control | 6006 | PREDIC TED: 52<br>similar to transferri n receptor                                                         | gi 1198796               | 85,420.40 | 100.00% | 6 | 8 | 8 | 0.09% | 7.93%  | VEYHLL SPYVSPR     | 3.93 | 1,559.82 |
| Control | 6006 | PREDIC TED: 52<br>similar to transferri n receptor                                                         | gi 1198796               | 85,420.40 | 100.00% | 6 | 8 | 8 | 0.09% | 7.93%  | VSASPLL YSLIEK     | 4.08 | 1,419.81 |
| Control | 6006 | Leucine rich repeat containin g 8 family, member A                                                         | gi 1153047, gi 116003833 | 93,997.70 | 100.00% | 3 | 3 | 3 | 0.03% | 3.83%  | IEAPALA FLR        | 2.81 | 1,100.65 |

|         |      |                                                                                         |                                                              |           |         |   |   |   |       |        |                                  |          |
|---------|------|-----------------------------------------------------------------------------------------|--------------------------------------------------------------|-----------|---------|---|---|---|-------|--------|----------------------------------|----------|
| Control | 6006 | Leucine rich repeat containing family, member A                                         | gi 115304767,gi 116003833                                    | 93,997.70 | 100.00% | 3 | 3 | 3 | 0.03% | 3.83%  | MANLTE 3.1<br>LELIR              | 1,318.70 |
| Control | 6006 | Leucine rich repeat containing family, member A                                         | gi 115304767,gi 116003833                                    | 93,997.70 | 100.00% | 3 | 3 | 3 | 0.03% | 3.83%  | YFADTQ 2.86<br>PAYR              | 1,231.57 |
| Control | 6006 | Caveolin 2                                                                              | gi 157279219,gi 38322700,gi 51512145,gi 56119130,gi 66774044 | 18,142.30 | 99.80%  | 2 | 2 | 4 | 0.04% | 18.50% | SFSSVSL 2.5<br>QLSHD             | 1,306.63 |
| Control | 6006 | Caveolin 2                                                                              | gi 157279219,gi 38322700,gi 51512145,gi 56119130,gi 66774044 | 18,142.30 | 99.80%  | 2 | 2 | 4 | 0.04% | 18.50% | VG FEDVI 2.77<br>AEPVST<br>HSFDK | 1,976.96 |
| Control | 6006 | solute carrier family 29 (nucleoside transporters), member 1                            | gi 110331885,gi 73587285,gi 77735743                         | 49,866.60 | 99.80%  | 2 | 2 | 2 | 0.02% | 6.80%  | LAFVPLL 3.92<br>LLCNVQ<br>PR     | 1,696.00 |
| Control | 6006 | solute carrier family 29 (nucleoside transporters), member 1                            | gi 110331885,gi 73587285,gi 77735743                         | 49,866.60 | 99.80%  | 2 | 2 | 2 | 0.02% | 6.80%  | LEGPGE 3.17<br>QETKLD<br>LISK    | 1,756.93 |
| Control | 6006 | guanine nucleotide binding protein (G protein), alpha inhibiting activity polypeptide 3 | gi 146231724,gi 77736299                                     | 40,519.40 | 99.80%  | 2 | 2 | 2 | 0.02% | 10.20% | ISQ TNYI 2.7<br>PTQQDV<br>LR     | 1,775.93 |
| Control | 6006 | guanine nucleotide binding protein (G protein), alpha inhibiting activity polypeptide 3 | gi 146231724,gi 77736299                                     | 40,519.40 | 99.80%  | 2 | 2 | 2 | 0.02% | 10.20% | LKIDFGE 4.24<br>AAR              | 1,119.62 |

|         |      |                                                                                                                                                                                                                                   |                                                         |           |         |   |   |   |       |        |                         |      |          |
|---------|------|-----------------------------------------------------------------------------------------------------------------------------------------------------------------------------------------------------------------------------------|---------------------------------------------------------|-----------|---------|---|---|---|-------|--------|-------------------------|------|----------|
| Control | 6006 | guanine<br>nucleotid<br>e binding<br>protein<br>(G<br>protein),<br>alpha<br>inhibiting<br>activity<br>polypepti<br>de 3                                                                                                           | gi 1462317<br>24,gi 77736                               | 40,519.40 | 99.80%  | 2 | 2 | 2 | 0.02% | 10.20% | LLLLGA<br>GESGK         | 3.48 | 1,057.63 |
| Control | 6006 | Chromos<br>ome 9<br>open<br>reading<br>frame 46<br>ortholog                                                                                                                                                                       | gi 7435452<br>9,gi 777357                               | 17,091.30 | 99.80%  | 2 | 2 | 3 | 0.03% | 17.00% | GMITFES<br>LEK          | 2.53 | 1,170.57 |
| Control | 6006 | Chromos<br>ome 9<br>open<br>reading<br>frame 46<br>ortholog                                                                                                                                                                       | gi 7435452<br>9,gi 777357                               | 17,091.30 | 99.80%  | 2 | 2 | 3 | 0.03% | 17.00% | MKGEAE<br>NILETEK<br>SK | 4.28 | 1,722.86 |
| Control | 6006 | RecName<br>:<br>Full=Gua<br>nine<br>nucleotid<br>e-binding<br>protein<br>subunit<br>alpha-11;<br>Short=G-<br>protein<br>subunit<br>alpha-11;<br>Short=G<br>alpha-11;<br>AltName:<br>Full=G-<br>protein<br>subunit<br>GL2<br>alpha | gi 1169852,<br>gi 1337774<br>82,gi 21756<br>8,gi 278057 | 41,360.90 | 100.00% | 5 | 6 | 6 | 0.07% | 23.20% | IATSGYL<br>PTQQDV<br>LR | 3.61 | 1,661.89 |



|         |      |                                                                                                                                                                                                                                   |                                                                           |         |   |   |   |       |        |                                   |      |          |
|---------|------|-----------------------------------------------------------------------------------------------------------------------------------------------------------------------------------------------------------------------------------|---------------------------------------------------------------------------|---------|---|---|---|-------|--------|-----------------------------------|------|----------|
| Control | 6006 | RecName<br>:<br>Full=Gua<br>nine<br>nucleotid<br>e-binding<br>protein<br>subunit<br>alpha-11;<br>Short=G-<br>protein<br>subunit<br>alpha-11;<br>Short=G<br>alpha-11;<br>AltName:<br>Full=G-<br>protein<br>subunit<br>GL2<br>alpha | gi 1169852, 41,360.90<br>gi 1337774<br>82,gi 21756<br>8,gi 278057<br>95   | 100.00% | 5 | 6 | 6 | 0.07% | 23.20% | LLLLGT<br>GESGK                   | 3.11 | 1,087.64 |
| Control | 6006 | RecName<br>:<br>Full=Gua<br>nine<br>nucleotid<br>e-binding<br>protein<br>subunit<br>alpha-11;<br>Short=G-<br>protein<br>subunit<br>alpha-11;<br>Short=G<br>alpha-11;<br>AltName:<br>Full=G-<br>protein<br>subunit<br>GL2<br>alpha | gi 1169852, 41,360.90<br>gi 1337774<br>82,gi 21756<br>8,gi 278057<br>95   | 100.00% | 5 | 6 | 6 | 0.07% | 23.20% | VRVPTT<br>GIIEYPF<br>DLENIIF<br>R | 4.98 | 2,492.36 |
| Control | 6006 | mitochon<br>drial<br>NADH:u<br>biquinon<br>e<br>oxidored<br>uctase<br>B16.6<br>subunit                                                                                                                                            | gi 1586461 16,655.90<br>6,gi 201390<br>62,gi 28603<br>804,gi 7426<br>8330 | 100.00% | 3 | 4 | 4 | 0.04% | 22.20% | IALMPLL<br>QAEK                   | 2.84 | 1,242.71 |
| Control | 6006 | mitochon<br>drial<br>NADH:u<br>biquinon<br>e<br>oxidored<br>uctase<br>B16.6<br>subunit                                                                                                                                            | gi 1586461 16,655.90<br>6,gi 201390<br>62,gi 28603<br>804,gi 7426<br>8330 | 100.00% | 3 | 4 | 4 | 0.04% | 22.20% | IALMPLL<br>QAEKDR<br>R            | 2.54 | 1,669.94 |

|         |      |                                                            |                                                                 |           |         |    |    |    |       |        |                                                                      |          |
|---------|------|------------------------------------------------------------|-----------------------------------------------------------------|-----------|---------|----|----|----|-------|--------|----------------------------------------------------------------------|----------|
| Control | 6006 | mitochondrial NADH:ubiquinone oxidoreductase B16.6 subunit | gi 15864616,gi 20139062,gi 28603804,gi 74268330                 | 16,655.90 | 100.00% | 3  | 4  | 4  | 0.04% | 22.20% | VKQDMP 5.46<br>PVGGYG<br>PIDYKR                                      | 2,036.03 |
| Control | 6006 | basigin                                                    | gi 115496127,gi 120419551,gi 154425710,gi 156713141,gi 73587049 | 29,754.80 | 100.00% | 3  | 3  | 3  | 0.03% | 17.70% | FFVVSSE 3.02<br>SR                                                   | 1,057.53 |
| Control | 6006 | basigin                                                    | gi 115496127,gi 120419551,gi 154425710,gi 156713141,gi 73587049 | 29,754.80 | 100.00% | 3  | 3  | 3  | 0.03% | 17.70% | RKPDEV 4.9<br>LDDEDI<br>GSAPLK                                       | 1,997.02 |
| Control | 6006 | basigin                                                    | gi 115496127,gi 120419551,gi 154425710,gi 156713141,gi 73587049 | 29,754.80 | 100.00% | 3  | 3  | 3  | 0.03% | 17.70% | VLKEDA 3.11<br>LPDLKT<br>EYEVDS<br>EDR                               | 2,464.21 |
| Control | 6006 | Tubulin, beta 2C                                           | gi 75773583,gi 77736271                                         | 49,812.70 | 100.00% | 10 | 11 | 15 | 0.16% | 30.60% | AVLVDL 3.33<br>EPGTMD<br>SVR                                         | 1,617.82 |
| Control | 6006 | Tubulin, beta 2C                                           | gi 75773583,gi 77736271                                         | 49,812.70 | 100.00% | 10 | 11 | 15 | 0.16% | 30.60% | GHYTEG 3.49<br>AELVDS<br>VLDVVR                                      | 1,958.98 |
| Control | 6006 | Tubulin, beta 2C                                           | gi 75773583,gi 77736271                                         | 49,812.70 | 100.00% | 10 | 11 | 15 | 0.16% | 30.60% | GHYTEG 3.77<br>AELVDS<br>VLDVVR<br>K                                 | 2,087.08 |
| Control | 6006 | Tubulin, beta 2C                                           | gi 75773583,gi 77736271                                         | 49,812.70 | 100.00% | 10 | 11 | 15 | 0.16% | 30.60% | IMNTFSV 3.05<br>VPSPK                                                | 1,335.70 |
| Control | 6006 | Tubulin, beta 2C                                           | gi 75773583,gi 77736271                                         | 49,812.70 | 100.00% | 10 | 11 | 15 | 0.16% | 30.60% | IREEYPD 2.98<br>RIMNTFS<br>VVPSPK                                    | 2,394.21 |
| Control | 6006 | Tubulin, beta 2C                                           | gi 75773583,gi 77736271                                         | 49,812.70 | 100.00% | 10 | 11 | 15 | 0.16% | 30.60% | ISEQFTA 2.73<br>MFR                                                  | 1,245.59 |
| Control | 6006 | Tubulin, beta 2C                                           | gi 75773583,gi 77736271                                         | 49,812.70 | 100.00% | 10 | 11 | 15 | 0.16% | 30.60% | LAVNMV 3.44<br>PFPR                                                  | 1,159.63 |
| Control | 6006 | Tubulin, beta 2C                                           | gi 75773583,gi 77736271                                         | 49,812.70 | 100.00% | 10 | 11 | 15 | 0.16% | 30.60% | LHFFMP 3.02<br>GFAPLTS<br>R                                          | 1,636.83 |
| Control | 6006 | Tubulin, beta 2C                                           | gi 75773583,gi 77736271                                         | 49,812.70 | 100.00% | 10 | 11 | 15 | 0.16% | 30.60% | VSDTVV 5.68<br>EPYNAT<br>LSVHQL<br>VENTDE<br>TYCIDNE<br>ALYDICF<br>R | 4,479.06 |
| Control | 6006 | Tubulin, beta 2C                                           | gi 75773583,gi 77736271                                         | 49,812.70 | 100.00% | 10 | 11 | 15 | 0.16% | 30.60% | YLTVAA 2.82<br>VFR                                                   | 1,039.59 |
| Control | 6006 | RAN binding protein 6                                      | gi 78174362,gi 83715972                                         | 47,285.80 | 99.80%  | 2  | 2  | 2  | 0.02% | 4.74%  | ITFLLQA 3.16<br>IR                                                   | 1,074.67 |



|         |      |                                                                                                                                                                                                                                                        |                                                                                |           |         |   |   |   |       |        |                                        |          |
|---------|------|--------------------------------------------------------------------------------------------------------------------------------------------------------------------------------------------------------------------------------------------------------|--------------------------------------------------------------------------------|-----------|---------|---|---|---|-------|--------|----------------------------------------|----------|
| Control | 6006 | RAN binding protein 6                                                                                                                                                                                                                                  | gi 7817436<br>2,gi 837159<br>72                                                | 47,285.80 | 99.80%  | 2 | 2 | 2 | 0.02% | 4.74%  | SLVEIAD 3.1<br>TVPK                    | 1,171.66 |
| Control | 6006 | RecName :<br>Full=LA<br>G1<br>longevity<br>assurance<br>homolog<br>2                                                                                                                                                                                   | gi 1098925<br>06,gi 73587<br>265,gi 7773<br>6279                               | 44,887.70 | 100.00% | 2 | 2 | 2 | 0.02% | 9.74%  | LRAPPNP 3.63<br>TLEHFY<br>MTSGKQ<br>PK | 2,428.24 |
| Control | 6006 | RecName :<br>Full=LA<br>G1<br>longevity<br>assurance<br>homolog<br>2                                                                                                                                                                                   | gi 1098925<br>06,gi 73587<br>265,gi 7773<br>6279                               | 44,887.70 | 100.00% | 2 | 2 | 2 | 0.02% | 9.74%  | NRPLAN 3.7<br>GHFILNN<br>NHR           | 1,836.97 |
| Control | 6006 | RecName :<br>Full=Pept<br>idyl-<br>prolyl cis-<br>trans<br>isomerase<br>B;<br>Short=PP<br>Iase;<br>Short=Ro<br>tamase;<br>AltName:<br>Full=Cyc<br>lophilin<br>B;<br>AltName:<br>Full=S-<br>cyclophili<br>n;<br>Short=SC<br>YLP;<br>Flags:<br>Precursor | gi 2152742<br>38,gi 27806<br>469,gi 5292<br>42,gi 59858<br>297,gi 7426<br>8324 | 23,726.00 | 100.00% | 3 | 3 | 3 | 0.03% | 15.70% | TVDNFV 3.27<br>ALATGE<br>K             | 1,364.71 |

|         |      |                                                                                                                                                                                                                                                           |                                                                                |           |         |   |   |   |       |        |                                       |          |
|---------|------|-----------------------------------------------------------------------------------------------------------------------------------------------------------------------------------------------------------------------------------------------------------|--------------------------------------------------------------------------------|-----------|---------|---|---|---|-------|--------|---------------------------------------|----------|
| Control | 6006 | RecName<br>:<br>Full=Pept<br>idyl-<br>prolyl cis-<br>trans<br>isomerase<br>B;<br>Short=PP<br>Iase;<br>Short=Ro<br>tamase;<br>AltName:<br>Full=Cyc<br>lophilin<br>B;<br>AltName:<br>Full=S-<br>cyclophili<br>n;<br>Short=SC<br>YLP;<br>Flags:<br>Precursor | gi 2152742<br>38,gi 27806<br>469,gi 5292<br>42,gi 59858<br>297,gi 7426<br>8324 | 23,726.00 | 100.00% | 3 | 3 | 3 | 0.03% | 15.70% | VIKDFMI 3.34<br>QGGDFT<br>R           | 1,642.83 |
| Control | 6006 | RecName<br>:<br>Full=Pept<br>idyl-<br>prolyl cis-<br>trans<br>isomerase<br>B;<br>Short=PP<br>Iase;<br>Short=Ro<br>tamase;<br>AltName:<br>Full=Cyc<br>lophilin<br>B;<br>AltName:<br>Full=S-<br>cyclophili<br>n;<br>Short=SC<br>YLP;<br>Flags:<br>Precursor | gi 2152742<br>38,gi 27806<br>469,gi 5292<br>42,gi 59858<br>297,gi 7426<br>8324 | 23,726.00 | 100.00% | 3 | 3 | 3 | 0.03% | 15.70% | VIKDFMI 2.3<br>QGGDFT<br>RGDGTG<br>GK | 2,215.08 |
| Control | 6006 | FLOT2<br>protein                                                                                                                                                                                                                                          | gi 1515536<br>23,gi 16445<br>2939                                              | 46,976.90 | 100.00% | 4 | 4 | 4 | 0.04% | 12.40% | MALVLD 3.57<br>ALPR                   | 1,114.63 |
| Control | 6006 | FLOT2<br>protein                                                                                                                                                                                                                                          | gi 1515536<br>23,gi 16445<br>2939                                              | 46,976.90 | 100.00% | 4 | 4 | 4 | 0.04% | 12.40% | NVVLQT 2.16<br>LEGHLR                 | 1,378.78 |
| Control | 6006 | FLOT2<br>protein                                                                                                                                                                                                                                          | gi 1515536<br>23,gi 16445<br>2939                                              | 46,976.90 | 100.00% | 4 | 4 | 4 | 0.04% | 12.40% | QVLLAQ 2.77<br>AEAEEK                 | 1,199.66 |
| Control | 6006 | FLOT2<br>protein                                                                                                                                                                                                                                          | gi 1515536<br>23,gi 16445<br>2939                                              | 46,976.90 | 100.00% | 4 | 4 | 4 | 0.04% | 12.40% | SILGTLT 3.04<br>VEQIYQ<br>DRDQFA<br>K | 2,325.21 |

|         |      |                                                                |                                                                                                                                                                                    |            |         |   |   |   |       |        |                                           |      |          |
|---------|------|----------------------------------------------------------------|------------------------------------------------------------------------------------------------------------------------------------------------------------------------------------|------------|---------|---|---|---|-------|--------|-------------------------------------------|------|----------|
| Control | 6006 | PREDIC TED:<br>similar to<br>mCG107<br>25<br>isoform 1         | gi 1198892<br>61.gi 11991<br>2821.gi 194<br>673249.gi 5<br>8760422.gi <br>70778964.g<br>i 74354988,<br>gi 7505208<br>0                                                             | 13,725.00  | 99.80%  | 2 | 2 | 2 | 0.02% | 15.20% | AALQEL<br>LSK                             | 2.76 | 972.5725 |
| Control | 6006 | PREDIC TED:<br>similar to<br>mCG107<br>25<br>isoform 1         | gi 1198892<br>61.gi 11991<br>2821.gi 194<br>673249.gi 5<br>8760422.gi <br>70778964.g<br>i 74354988,<br>gi 7505208<br>0                                                             | 13,725.00  | 99.80%  | 2 | 2 | 2 | 0.02% | 15.20% | LITPAVV<br>SER                            | 2.25 | 1,084.64 |
| Control | 6006 | heterogen<br>eous<br>nuclear<br>ribonucle<br>oprotein<br>A2/B1 | gi 1140517<br>56.gi 12214<br>5945.gi 875<br>78315                                                                                                                                  | 35,988.50  | 99.80%  | 2 | 2 | 2 | 0.02% | 13.20% | GFGFVT<br>FDDHDP<br>VDKIVL<br>QK          | 1.72 | 2,277.16 |
| Control | 6006 | heterogen<br>eous<br>nuclear<br>ribonucle<br>oprotein<br>A2/B1 | gi 1140517<br>56.gi 12214<br>5945.gi 875<br>78315                                                                                                                                  | 35,988.50  | 99.80%  | 2 | 2 | 2 | 0.02% | 13.20% | NMGGPY<br>GGGNYG<br>PGGSGG<br>SGGYGG<br>R | 3.82 | 2,205.90 |
| Control | 6006 | RecName<br>:<br>Full=Clat<br>hrin<br>heavy<br>chain 1          | gi 1705915,<br>gi 2780668<br>9.gi 565545<br>48.gi 56554<br>549.gi 5655<br>4550.gi 565<br>54551.gi 56<br>554552.gi 5<br>6554553.gi <br>56554554.g<br>i 56554555,<br>gi 5655455<br>6 | 186,919.60 | 100.00% | 8 | 8 | 8 | 0.09% | 7.18%  | AFMTAD<br>LPNELIE<br>LLEK                 | 2.69 | 1,963.01 |
| Control | 6006 | RecName<br>:<br>Full=Clat<br>hrin<br>heavy<br>chain 1          | gi 1705915,<br>gi 2780668<br>9.gi 565545<br>48.gi 56554<br>549.gi 5655<br>4550.gi 565<br>54551.gi 56<br>554552.gi 5<br>6554553.gi <br>56554554.g<br>i 56554555,<br>gi 5655455<br>6 | 186,919.60 | 100.00% | 8 | 8 | 8 | 0.09% | 7.18%  | KFDVNT<br>SAVQVLI<br>EHIGNL<br>DR         | 3.84 | 2,368.26 |

|         |      |                                                       |                                                                                                                                                                                    |            |         |   |   |   |       |       |                                 |      |          |
|---------|------|-------------------------------------------------------|------------------------------------------------------------------------------------------------------------------------------------------------------------------------------------|------------|---------|---|---|---|-------|-------|---------------------------------|------|----------|
| Control | 6006 | RecName<br>:<br>Full=Clat<br>hrin<br>heavy<br>chain 1 | gi 1705915,<br>gi 2780668<br>9,gi 565545<br>48,gi 56554<br>549,gi 5655<br>4550,gi 565<br>54551,gi 56<br>554552,gi 5<br>6554553,gi <br>56554554,g<br>i 56554555,<br>gi 5655455<br>6 | 186,919.60 | 100.00% | 8 | 8 | 8 | 0.09% | 7.18% | LASTLV<br>HLGEYQ<br>AAVDGA<br>R | 2.81 | 1,971.03 |
| Control | 6006 | RecName<br>:<br>Full=Clat<br>hrin<br>heavy<br>chain 1 | gi 1705915,<br>gi 2780668<br>9,gi 565545<br>48,gi 56554<br>549,gi 5655<br>4550,gi 565<br>54551,gi 56<br>554552,gi 5<br>6554553,gi <br>56554554,g<br>i 56554555,<br>gi 5655455<br>6 | 186,919.60 | 100.00% | 8 | 8 | 8 | 0.09% | 7.18% | LLYNNV<br>SNFGR                 | 3.2  | 1,296.67 |
| Control | 6006 | RecName<br>:<br>Full=Clat<br>hrin<br>heavy<br>chain 1 | gi 1705915,<br>gi 2780668<br>9,gi 565545<br>48,gi 56554<br>549,gi 5655<br>4550,gi 565<br>54551,gi 56<br>554552,gi 5<br>6554553,gi <br>56554554,g<br>i 56554555,<br>gi 5655455<br>6 | 186,919.60 | 100.00% | 8 | 8 | 8 | 0.09% | 7.18% | NLQNLLI<br>LTAIK                | 3.26 | 1,353.85 |
| Control | 6006 | RecName<br>:<br>Full=Clat<br>hrin<br>heavy<br>chain 1 | gi 1705915,<br>gi 2780668<br>9,gi 565545<br>48,gi 56554<br>549,gi 5655<br>4550,gi 565<br>54551,gi 56<br>554552,gi 5<br>6554553,gi <br>56554554,g<br>i 56554555,<br>gi 5655455<br>6 | 186,919.60 | 100.00% | 8 | 8 | 8 | 0.09% | 7.18% | NNLAGA<br>EELFAR                | 3.46 | 1,304.66 |
| Control | 6006 | RecName<br>:<br>Full=Clat<br>hrin<br>heavy<br>chain 1 | gi 1705915,<br>gi 2780668<br>9,gi 565545<br>48,gi 56554<br>549,gi 5655<br>4550,gi 565<br>54551,gi 56<br>554552,gi 5<br>6554553,gi <br>56554554,g<br>i 56554555,<br>gi 5655455<br>6 | 186,919.60 | 100.00% | 8 | 8 | 8 | 0.09% | 7.18% | RPISADS<br>AIMNPA<br>SK         | 3.26 | 1,573.80 |

|         |      |                                                                                                                                                         |                                                                                                                                                                                    |            |         |   |   |   |       |       |                                             |      |          |
|---------|------|---------------------------------------------------------------------------------------------------------------------------------------------------------|------------------------------------------------------------------------------------------------------------------------------------------------------------------------------------|------------|---------|---|---|---|-------|-------|---------------------------------------------|------|----------|
| Control | 6006 | RecName<br>:<br>Full=Clat<br>hrin<br>heavy<br>chain 1                                                                                                   | gi 1705915,<br>gi 2780668<br>9,gi 565545<br>48,gi 56554<br>549,gi 5655<br>4550,gi 565<br>54551,gi 56<br>554552,gi 5<br>6554553,gi <br>56554554,g<br>i 56554555,<br>gi 5655455<br>6 | 186,919.60 | 100.00% | 8 | 8 | 8 | 0.09% | 7.18% | TLQIFNI<br>EMK                              | 2.66 | 1,252.66 |
| Control | 6006 | PREDIC<br>TED:<br>similar to<br>Tyrosine-<br>protein<br>kinase-<br>like 7<br>precursor<br>(Colon<br>carcinom<br>a kinase<br>4) (CCK-<br>4)<br>isoform 2 | gi 1199152<br>91                                                                                                                                                                   | 126,668.70 | 100.00% | 4 | 5 | 5 | 0.05% | 5.74% | HPASEA<br>AIQPLTQ<br>VTLR                   | 3.27 | 1,832.00 |
| Control | 6006 | PREDIC<br>TED:<br>similar to<br>Tyrosine-<br>protein<br>kinase-<br>like 7<br>precursor<br>(Colon<br>carcinom<br>a kinase<br>4) (CCK-<br>4)<br>isoform 2 | gi 1199152<br>91                                                                                                                                                                   | 126,668.70 | 100.00% | 4 | 5 | 5 | 0.05% | 5.74% | HTEAPL<br>YVVDKP<br>VLEESE<br>GPGSPPP<br>YK | 2.97 | 2,935.47 |
| Control | 6006 | PREDIC<br>TED:<br>similar to<br>Tyrosine-<br>protein<br>kinase-<br>like 7<br>precursor<br>(Colon<br>carcinom<br>a kinase<br>4) (CCK-<br>4)<br>isoform 2 | gi 1199152<br>91                                                                                                                                                                   | 126,668.70 | 100.00% | 4 | 5 | 5 | 0.05% | 5.74% | SEFGVEVF<br>LAK                             | 2.37 | 1,126.58 |
| Control | 6006 | PREDIC<br>TED:<br>similar to<br>Tyrosine-<br>protein<br>kinase-<br>like 7<br>precursor<br>(Colon<br>carcinom<br>a kinase<br>4) (CCK-<br>4)<br>isoform 2 | gi 1199152<br>91                                                                                                                                                                   | 126,668.70 | 100.00% | 4 | 5 | 5 | 0.05% | 5.74% | VVLAPQ<br>DVVVAR                            | 2.49 | 1,265.76 |

|         |      |                                                                                  |                                                |           |         |   |   |   |       |        |                                     |      |          |
|---------|------|----------------------------------------------------------------------------------|------------------------------------------------|-----------|---------|---|---|---|-------|--------|-------------------------------------|------|----------|
| Control | 6006 | hydroxyst<br>eroid (17-<br>beta)<br>dehydrog<br>enase 11                         | gi 1140528<br>.gi 86438<br>493                 | 35,077.20 | 100.00% | 4 | 6 | 6 | 0.07% | 14.20% | FDAVIG<br>YK                        | 2.5  | 912.4826 |
| Control | 6006 | hydroxyst<br>eroid (17-<br>beta)<br>dehydrog<br>enase 11                         | gi 1140528<br>.gi 86438<br>493                 | 35,077.20 | 100.00% | 4 | 6 | 6 | 0.07% | 14.20% | KSVTGEI<br>VLITGA<br>GHGIGR         | 4.13 | 1,865.06 |
| Control | 6006 | hydroxyst<br>eroid (17-<br>beta)<br>dehydrog<br>enase 11                         | gi 1140528<br>.gi 86438<br>493                 | 35,077.20 | 100.00% | 4 | 6 | 6 | 0.07% | 14.20% | NPSTSLG<br>PTLEPEE<br>VVNK          | 3.6  | 1,910.97 |
| Control | 6006 | hydroxyst<br>eroid (17-<br>beta)<br>dehydrog<br>enase 11                         | gi 1140528<br>.gi 86438<br>493                 | 35,077.20 | 100.00% | 4 | 6 | 6 | 0.07% | 14.20% | SVTGEIV<br>LITGAG<br>HGIGR          | 3.31 | 1,736.97 |
| Control | 6006 | Ribosom<br>al protein<br>S3                                                      | gi 7426822<br>.gi 774042<br>90.gi 91207<br>641 | 26,670.50 | 100.00% | 5 | 5 | 5 | 0.05% | 29.20% | AELNEFL<br>TR                       | 3.27 | 1,092.57 |
| Control | 6006 | Ribosom<br>al protein<br>S3                                                      | gi 7426822<br>.gi 774042<br>90.gi 91207<br>641 | 26,670.50 | 100.00% | 5 | 5 | 5 | 0.05% | 29.20% | ELAEDG<br>YSGVEV<br>R               | 3.29 | 1,423.67 |
| Control | 6006 | Ribosom<br>al protein<br>S3                                                      | gi 7426822<br>.gi 774042<br>90.gi 91207<br>641 | 26,670.50 | 100.00% | 5 | 5 | 5 | 0.05% | 29.20% | FVDGLM<br>IHSGDPV<br>NYYYVDT<br>AVR | 4.88 | 2,484.19 |
| Control | 6006 | Ribosom<br>al protein<br>S3                                                      | gi 7426822<br>.gi 774042<br>90.gi 91207<br>641 | 26,670.50 | 100.00% | 5 | 5 | 5 | 0.05% | 29.20% | GGKPEP<br>PAMPQP<br>VPTA            | 2.57 | 1,589.80 |
| Control | 6006 | Ribosom<br>al protein<br>S3                                                      | gi 7426822<br>.gi 774042<br>90.gi 91207<br>641 | 26,670.50 | 100.00% | 5 | 5 | 5 | 0.05% | 29.20% | IRELTAV<br>VQKR                     | 3.74 | 1,312.81 |
| Control | 6006 | Leucine<br>zipper-EF<br>hand<br>containin<br>g<br>transmem<br>brane<br>protein 1 | gi 1113086<br>.gi 11549<br>7920                | 81,801.70 | 100.00% | 3 | 5 | 5 | 0.05% | 5.74%  | AMYLPE<br>TLSPAD<br>QLK             | 2.26 | 1,692.85 |
| Control | 6006 | Leucine<br>zipper-EF<br>hand<br>containin<br>g<br>transmem<br>brane<br>protein 1 | gi 1113086<br>.gi 11549<br>7920                | 81,801.70 | 100.00% | 3 | 5 | 5 | 0.05% | 5.74%  | FLQDTIE<br>EMALK                    | 3.54 | 1,453.72 |
| Control | 6006 | Leucine<br>zipper-EF<br>hand<br>containin<br>g<br>transmem<br>brane<br>protein 1 | gi 1113086<br>.gi 11549<br>7920                | 81,801.70 | 100.00% | 3 | 5 | 5 | 0.05% | 5.74%  | IRETGER<br>PSNEEIM<br>R             | 2.17 | 1,832.89 |

|         |      |                                   |                                                                           |           |         |    |    |    |       |        |                                                             |          |
|---------|------|-----------------------------------|---------------------------------------------------------------------------|-----------|---------|----|----|----|-------|--------|-------------------------------------------------------------|----------|
| Control | 6006 | unnamed protein product           | gi 117576085,gi 117576087,gi 119935998,gi 1902982,gi 27806503,gi 73621334 | 31,134.50 | 99.80%  | 2  | 2  | 3  | 0.03% | 8.42%  | EMIETLA 2.58<br>HKLDEK                                      | 1,572.79 |
| Control | 6006 | unnamed protein product           | gi 117576085,gi 117576087,gi 119935998,gi 1902982,gi 27806503,gi 73621334 | 31,134.50 | 99.80%  | 2  | 2  | 3  | 0.03% | 8.42%  | QNLNLQ 3.13<br>EVLK                                         | 1,198.68 |
| Control | 6006 | voltage-dependent anion channel 1 | gi 8810220,gi 90111863                                                    | 30,723.80 | 100.00% | 12 | 15 | 23 | 0.25% | 42.40% | GLKLTF 4.54<br>DSSFSPN<br>TGKK                              | 1,826.96 |
| Control | 6006 | voltage-dependent anion channel 1 | gi 8810220,gi 90111863                                                    | 30,723.80 | 100.00% | 12 | 15 | 23 | 0.25% | 42.40% | GYGFGLI 2.13<br>K                                           | 854.4772 |
| Control | 6006 | voltage-dependent anion channel 1 | gi 8810220,gi 90111863                                                    | 30,723.80 | 100.00% | 12 | 15 | 23 | 0.25% | 42.40% | LTFDSSF 3.61<br>SPNTGK                                      | 1,400.67 |
| Control | 6006 | voltage-dependent anion channel 1 | gi 8810220,gi 90111863                                                    | 30,723.80 | 100.00% | 12 | 15 | 23 | 0.25% | 42.40% | LTFDSSF 2.77<br>SPNTGK<br>K                                 | 1,528.76 |
| Control | 6006 | voltage-dependent anion channel 1 | gi 8810220,gi 90111863                                                    | 30,723.80 | 100.00% | 12 | 15 | 23 | 0.25% | 42.40% | LTLSALL 3.04<br>DGK                                         | 1,030.61 |
| Control | 6006 | voltage-dependent anion channel 1 | gi 8810220,gi 90111863                                                    | 30,723.80 | 100.00% | 12 | 15 | 23 | 0.25% | 42.40% | LTLSALL 4.14<br>DGKNVN<br>AGGHK                             | 1,808.00 |
| Control | 6006 | voltage-dependent anion channel 1 | gi 8810220,gi 90111863                                                    | 30,723.80 | 100.00% | 12 | 15 | 23 | 0.25% | 42.40% | SRVTQS 3.88<br>NFAVGY<br>K                                  | 1,456.75 |
| Control | 6006 | voltage-dependent anion channel 1 | gi 8810220,gi 90111863                                                    | 30,723.80 | 100.00% | 12 | 15 | 23 | 0.25% | 42.40% | TDEFQL 4.56<br>HTNVND<br>GTEFGG<br>SIYQK                    | 2,600.19 |
| Control | 6006 | voltage-dependent anion channel 1 | gi 8810220,gi 90111863                                                    | 30,723.80 | 100.00% | 12 | 15 | 23 | 0.25% | 42.40% | TKSENG 4.12<br>LEFTSSG<br>SANTET<br>TK                      | 2,189.02 |
| Control | 6006 | voltage-dependent anion channel 1 | gi 8810220,gi 90111863                                                    | 30,723.80 | 100.00% | 12 | 15 | 23 | 0.25% | 42.40% | VNNSSLI 3.15<br>GLGYTQ<br>TLKPGIK                           | 2,103.18 |
| Control | 6006 | voltage-dependent anion channel 1 | gi 8810220,gi 90111863                                                    | 30,723.80 | 100.00% | 12 | 15 | 23 | 0.25% | 42.40% | VTQSNF 3.71<br>AVGYK                                        | 1,213.62 |
| Control | 6006 | voltage-dependent anion channel 1 | gi 8810220,gi 90111863                                                    | 30,723.80 | 100.00% | 12 | 15 | 23 | 0.25% | 42.40% | VTQSNF 3.04<br>AVGYKT<br>DEFQLH<br>TNVNDG<br>TEFGGSI<br>YQK | 3,794.79 |

|         |      |                                                                           |                                                                                               |            |         |   |    |    |       |        |                                     |      |          |
|---------|------|---------------------------------------------------------------------------|-----------------------------------------------------------------------------------------------|------------|---------|---|----|----|-------|--------|-------------------------------------|------|----------|
| Control | 6006 | voltage-<br>dependen<br>t anion<br>channel 2                              | gi 5985840<br>1,gi 621771<br>48,gi 73586<br>695,gi 8574<br>295,gi 8810<br>222,gi 9011<br>1864 | 31,602.50  | 100.00% | 9 | 11 | 18 | 0.20% | 34.00% | DIFNKGK<br>GFGLVK                   | 3.97 | 1,441.78 |
| Control | 6006 | voltage-<br>dependen<br>t anion<br>channel 2                              | gi 5985840<br>1,gi 621771<br>48,gi 73586<br>695,gi 8574<br>295,gi 8810<br>222,gi 9011<br>1864 | 31,602.50  | 100.00% | 9 | 11 | 18 | 0.20% | 34.00% | GFGFGL<br>VK                        | 1.78 | 824.4666 |
| Control | 6006 | voltage-<br>dependen<br>t anion<br>channel 2                              | gi 5985840<br>1,gi 621771<br>48,gi 73586<br>695,gi 8574<br>295,gi 8810<br>222,gi 9011<br>1864 | 31,602.50  | 100.00% | 9 | 11 | 18 | 0.20% | 34.00% | LTFDITF<br>SPNTGK                   | 3.65 | 1,428.70 |
| Control | 6006 | voltage-<br>dependen<br>t anion<br>channel 2                              | gi 5985840<br>1,gi 621771<br>48,gi 73586<br>695,gi 8574<br>295,gi 8810<br>222,gi 9011<br>1864 | 31,602.50  | 100.00% | 9 | 11 | 18 | 0.20% | 34.00% | LTFDITF<br>SPNTGK<br>K              | 2.17 | 1,556.80 |
| Control | 6006 | voltage-<br>dependen<br>t anion<br>channel 2                              | gi 5985840<br>1,gi 621771<br>48,gi 73586<br>695,gi 8574<br>295,gi 8810<br>222,gi 9011<br>1864 | 31,602.50  | 100.00% | 9 | 11 | 18 | 0.20% | 34.00% | LTLSAL<br>VDGK                      | 3.34 | 1,016.60 |
| Control | 6006 | voltage-<br>dependen<br>t anion<br>channel 2                              | gi 5985840<br>1,gi 621771<br>48,gi 73586<br>695,gi 8574<br>295,gi 8810<br>222,gi 9011<br>1864 | 31,602.50  | 100.00% | 9 | 11 | 18 | 0.20% | 34.00% | NNFAVG<br>YR                        | 2.46 | 940.4634 |
| Control | 6006 | voltage-<br>dependen<br>t anion<br>channel 2                              | gi 5985840<br>1,gi 621771<br>48,gi 73586<br>695,gi 8574<br>295,gi 8810<br>222,gi 9011<br>1864 | 31,602.50  | 100.00% | 9 | 11 | 18 | 0.20% | 34.00% | TGDFQL<br>HTNVND<br>GTEFGG<br>SIYQK | 5.54 | 2,528.17 |
| Control | 6006 | voltage-<br>dependen<br>t anion<br>channel 2                              | gi 5985840<br>1,gi 621771<br>48,gi 73586<br>695,gi 8574<br>295,gi 8810<br>222,gi 9011<br>1864 | 31,602.50  | 100.00% | 9 | 11 | 18 | 0.20% | 34.00% | VNNSLI<br>GVGYTQ<br>TLRPGV<br>K     | 4.24 | 2,103.16 |
| Control | 6006 | voltage-<br>dependen<br>t anion<br>channel 2                              | gi 5985840<br>1,gi 621771<br>48,gi 73586<br>695,gi 8574<br>295,gi 8810<br>222,gi 9011<br>1864 | 31,602.50  | 100.00% | 9 | 11 | 18 | 0.20% | 34.00% | YQLDPT<br>ASISAK                    | 2.84 | 1,293.67 |
| Control | 6006 | PREDIC<br>TED:<br>similar to<br>leucyl/cys<br>tinyl<br>aminopep<br>tidase | gi 1198959<br>33                                                                              | 119,380.70 | 100.00% | 4 | 7  | 8  | 0.09% | 6.02%  | GLGEHE<br>LDEDEE<br>DYESSA<br>K     | 4.52 | 2,151.88 |



|         |      |                                                                                     |                                                                                           |            |         |   |   |   |       |        |                                                        |      |          |
|---------|------|-------------------------------------------------------------------------------------|-------------------------------------------------------------------------------------------|------------|---------|---|---|---|-------|--------|--------------------------------------------------------|------|----------|
| Control | 6006 | PREDICTED:<br>similar to<br>leucyl/cystinyl<br>aminopeptidase                       | gi 119895933                                                                              | 119,380.70 | 100.00% | 4 | 7 | 8 | 0.09% | 6.02%  | IFGELSS<br>YEDFLD<br>AR                                | 3.48 | 1,761.83 |
| Control | 6006 | PREDICTED:<br>similar to<br>leucyl/cystinyl<br>aminopeptidase                       | gi 119895933                                                                              | 119,380.70 | 100.00% | 4 | 7 | 8 | 0.09% | 6.02%  | IKRDEQ<br>YTALSN<br>MPK                                | 4.41 | 1,809.92 |
| Control | 6006 | PREDICTED:<br>similar to<br>leucyl/cystinyl<br>aminopeptidase                       | gi 119895933                                                                              | 119,380.70 | 100.00% | 4 | 7 | 8 | 0.09% | 6.02%  | KYFAAT<br>QFEPLA<br>AR                                 | 3.71 | 1,612.85 |
| Control | 6006 | CYB5B protein                                                                       | gi 158455068,gi 76640228                                                                  | 26,782.70  | 99.80%  | 2 | 2 | 2 | 0.02% | 22.40% | FLDEHP<br>GGEEVL<br>MEQAGG<br>DATESFE<br>DVGHSS<br>DAR | 5.99 | 3,634.55 |
| Control | 6006 | CYB5B protein                                                                       | gi 158455068,gi 76640228                                                                  | 26,782.70  | 99.80%  | 2 | 2 | 2 | 0.02% | 22.40% | QYYIGD<br>VHPNDL<br>KPGGGS<br>K                        | 2.76 | 2,045.01 |
| Control | 6006 | Chain B, Crystal Structure Of Bovine Heart Mitochondrial Bcl-1 With Jg144 Inhibitor | gi 114793902,gi 27807143,gi 300,gi 401248,gi 59858351,gi 73586962,gi 82407277,gi 82407288 | 46,506.00  | 99.80%  | 2 | 2 | 2 | 0.02% | 5.92%  | QVAEQF<br>LNIR                                         | 2.79 | 1,217.66 |
| Control | 6006 | Chain B, Crystal Structure Of Bovine Heart Mitochondrial Bcl-1 With Jg144 Inhibitor | gi 114793902,gi 27807143,gi 300,gi 401248,gi 59858351,gi 73586962,gi 82407277,gi 82407288 | 46,506.00  | 99.80%  | 2 | 2 | 2 | 0.02% | 5.92%  | TIAQGN<br>LSNPDV<br>QAAK                               | 4.47 | 1,626.84 |
| Control | 6006 | Flotillin 1                                                                         | gi 115305033,gi 116004001,gi 118572320,gi 75775078                                        | 47,334.80  | 100.00% | 5 | 5 | 5 | 0.05% | 15.50% | AQQVAV<br>QEQEIAR                                      | 4.35 | 1,469.77 |
| Control | 6006 | Flotillin 1                                                                         | gi 115305033,gi 116004001,gi 118572320,gi 75775078                                        | 47,334.80  | 100.00% | 5 | 5 | 5 | 0.05% | 15.50% | ISLNTLT<br>LNVK                                        | 3.03 | 1,215.73 |

|         |      |                                                               |                                                     |           |         |   |   |   |       |        |                                                                    |          |
|---------|------|---------------------------------------------------------------|-----------------------------------------------------|-----------|---------|---|---|---|-------|--------|--------------------------------------------------------------------|----------|
| Control | 6006 | Flotillin 1                                                   | gi 115305033,gi 116004001,gi 118572320,gi 75775078  | 47,334.80 | 100.00% | 5 | 5 | 5 | 0.05% | 15.50% | MRGEAE 4.03<br>AFAIGAR                                             | 1,394.68 |
| Control | 6006 | Flotillin 1                                                   | gi 115305033,gi 116004001,gi 118572320,gi 75775078  | 47,334.80 | 100.00% | 5 | 5 | 5 | 0.05% | 15.50% | TEAEIAH 3.3<br>IALETLE<br>GHQR                                     | 2,018.03 |
| Control | 6006 | Flotillin 1                                                   | gi 115305033,gi 116004001,gi 118572320,gi 75775078  | 47,334.80 | 100.00% | 5 | 5 | 5 | 0.05% | 15.50% | VTGEVL 2.87<br>DILSR                                               | 1,201.68 |
| Control | 6006 | glutathione peroxidase 8                                      | gi 114052907,gi 122143886,gi 84708688               | 23,965.80 | 99.80%  | 2 | 3 | 3 | 0.03% | 11.00% | ILGSEAE 3.19<br>PAFR                                               | 1,189.62 |
| Control | 6006 | glutathione peroxidase 8                                      | gi 114052907,gi 122143886,gi 84708688               | 23,965.80 | 99.80%  | 2 | 3 | 3 | 0.03% | 11.00% | NNFGVT 3.19<br>FPIPHK                                              | 1,420.74 |
| Control | 6006 | ANXA6 protein                                                 | gi 154426044,gi 157151716,gi 160332337              | 75,893.80 | 100.00% | 4 | 4 | 4 | 0.04% | 9.21%  | EMSGDV 3.76<br>RDVFVA<br>IVQSVK                                    | 1,995.02 |
| Control | 6006 | ANXA6 protein                                                 | gi 154426044,gi 157151716,gi 160332337              | 75,893.80 | 100.00% | 4 | 4 | 4 | 0.04% | 9.21%  | GLGTDE 2.84<br>DTIIDIA<br>HR                                       | 1,738.90 |
| Control | 6006 | ANXA6 protein                                                 | gi 154426044,gi 157151716,gi 160332337              | 75,893.80 | 100.00% | 4 | 4 | 4 | 0.04% | 9.21%  | GTVRPA 2.53<br>GDFNPD<br>ADAK                                      | 1,630.78 |
| Control | 6006 | ANXA6 protein                                                 | gi 154426044,gi 157151716,gi 160332337              | 75,893.80 | 100.00% | 4 | 4 | 4 | 0.04% | 9.21%  | NKPLFF 4.46<br>ADKLYK                                              | 1,483.83 |
| Control | 6006 | dolichyl-diphosphooligosaccharide-protein glycosyltransferase | gi 110665590,gi 151555878,gi 155371877,gi 215275740 | 48,774.90 | 100.00% | 6 | 7 | 9 | 0.10% | 20.50% | GFVLTF 2.04<br>K                                                   | 811.4713 |
| Control | 6006 | dolichyl-diphosphooligosaccharide-protein glycosyltransferase | gi 110665590,gi 151555878,gi 155371877,gi 215275740 | 48,774.90 | 100.00% | 6 | 7 | 9 | 0.10% | 20.50% | GVGMV 5<br>ADPDNP<br>LVLDILT<br>GSSTSYS<br>FFPKPI<br>TQYPHA<br>VGK | 4,350.16 |
| Control | 6006 | dolichyl-diphosphooligosaccharide-protein glycosyltransferase | gi 110665590,gi 151555878,gi 155371877,gi 215275740 | 48,774.90 | 100.00% | 6 | 7 | 9 | 0.10% | 20.50% | LPDVY 2.73<br>VFQFK                                                | 1,312.69 |
| Control | 6006 | dolichyl-diphosphooligosaccharide-protein glycosyltransferase | gi 110665590,gi 151555878,gi 155371877,gi 215275740 | 48,774.90 | 100.00% | 6 | 7 | 9 | 0.10% | 20.50% | SSLNPIL 2.63<br>FR                                                 | 1,046.60 |

|         |      |                                                                                                    |                                                                     |           |         |   |   |   |       |        |                                              |      |          |
|---------|------|----------------------------------------------------------------------------------------------------|---------------------------------------------------------------------|-----------|---------|---|---|---|-------|--------|----------------------------------------------|------|----------|
| Control | 6006 | dolichyl-<br>diphosph<br>ooligosac<br>charide-<br>protein<br>glycosyltr<br>ansferase               | gi 1106655<br>90,gi 15155<br>5878,gi 155<br>371877,gi 2<br>15275740 | 48,774.90 | 100.00% | 6 | 7 | 9 | 0.10% | 20.50% | TADDPS<br>LSLIK                              | 2.95 | 1,159.62 |
| Control | 6006 | dolichyl-<br>diphosph<br>ooligosac<br>charide-<br>protein<br>glycosyltr<br>ansferase               | gi 1106655<br>90,gi 15155<br>5878,gi 155<br>371877,gi 2<br>15275740 | 48,774.90 | 100.00% | 6 | 7 | 9 | 0.10% | 20.50% | TLVLLD<br>NLNLR                              | 3.4  | 1,283.77 |
| Control | 6006 | reticulon<br>4 isoform<br>2                                                                        | gi 1642593<br>54,gi 92096<br>636                                    | 40,940.20 | 100.00% | 3 | 4 | 4 | 0.04% | 7.92%  | GPLPAA<br>PLAAPE<br>R                        | 3.22 | 1,259.71 |
| Control | 6006 | reticulon<br>4 isoform<br>2                                                                        | gi 1642593<br>54,gi 92096<br>636                                    | 40,940.20 | 100.00% | 3 | 4 | 4 | 0.04% | 7.92%  | HQAQID<br>HYLGLA<br>NK                       | 4.79 | 1,607.83 |
| Control | 6006 | reticulon<br>4 isoform<br>2                                                                        | gi 1642593<br>54,gi 92096<br>636                                    | 40,940.20 | 100.00% | 3 | 4 | 4 | 0.04% | 7.92%  | HQAQID<br>HYLGLA<br>NKNVK                    | 3.47 | 1,949.04 |
| Control | 6006 | ATL3<br>protein                                                                                    | gi 1487454<br>56,gi 15470<br>7918                                   | 60,294.70 | 100.00% | 5 | 7 | 8 | 0.09% | 15.70% | ALASILL<br>QDHIR                             | 3.43 | 1,349.79 |
| Control | 6006 | ATL3<br>protein                                                                                    | gi 1487454<br>56,gi 15470<br>7918                                   | 60,294.70 | 100.00% | 5 | 7 | 8 | 0.09% | 15.70% | IYQGED<br>LPHPK                              | 3.17 | 1,296.66 |
| Control | 6006 | ATL3<br>protein                                                                                    | gi 1487454<br>56,gi 15470<br>7918                                   | 60,294.70 | 100.00% | 5 | 7 | 8 | 0.09% | 15.70% | LKDIASE<br>FKEQLQ<br>TLILHVL<br>NPANLM<br>EK | 4.19 | 3,251.77 |
| Control | 6006 | ATL3<br>protein                                                                                    | gi 1487454<br>56,gi 15470<br>7918                                   | 60,294.70 | 100.00% | 5 | 7 | 8 | 0.09% | 15.70% | LQVKEH<br>QHEEQ<br>NVR                       | 3.36 | 1,886.98 |
| Control | 6006 | ATL3<br>protein                                                                                    | gi 1487454<br>56,gi 15470<br>7918                                   | 60,294.70 | 100.00% | 5 | 7 | 8 | 0.09% | 15.70% | SMLQAT<br>AEANNL<br>AAAASA<br>K              | 5.43 | 1,848.91 |
| Control | 6006 | RecName<br>:<br>Full=Glut<br>athione S-<br>transferas<br>e P;<br>AltName:<br>Full=GS<br>T class-pi | gi 121744,g<br>i 29135329,<br>gi 404,gi 74<br>268086                | 23,595.90 | 99.80%  | 2 | 2 | 2 | 0.02% | 15.70% | ALPQHL<br>KPFETLL<br>SQNK                    | 3.19 | 1,964.10 |
| Control | 6006 | RecName<br>:<br>Full=Glut<br>athione S-<br>transferas<br>e P;<br>AltName:<br>Full=GS<br>T class-pi | gi 121744,g<br>i 29135329,<br>gi 404,gi 74<br>268086                | 23,595.90 | 99.80%  | 2 | 2 | 2 | 0.02% | 15.70% | FQDGDG<br>TLYQSN<br>AILR                     | 4.04 | 1,853.94 |

|         |      |                                                                                                     |            |           |         |    |    |    |       |        |                                    |      |          |
|---------|------|-----------------------------------------------------------------------------------------------------|------------|-----------|---------|----|----|----|-------|--------|------------------------------------|------|----------|
| Control | 6006 | Poliovirus receptor-related 2 (herpesvirus entry mediator B)                                        | gi 1096583 | 43,243.10 | 99.80%  | 2  | 2  | 2  | 0.02% | 5.46%  | LLPVILS<br>VR                      | 2.12 | 1,009.68 |
| Control | 6006 | Poliovirus receptor-related 2 (herpesvirus entry mediator B)                                        | gi 1096583 | 43,243.10 | 99.80%  | 2  | 2  | 2  | 0.02% | 5.46%  | YTVTPL<br>SEADGV<br>K              | 2.93 | 1,379.71 |
| Control | 6006 | Lamin A/C                                                                                           | gi 7435471 | 65,105.20 | 100.00% | 4  | 4  | 4  | 0.04% | 9.09%  | IRIDSLS<br>AQLSQL<br>QK            | 3.24 | 1,699.97 |
| Control | 6006 | Lamin A/C                                                                                           | gi 7435471 | 65,105.20 | 100.00% | 4  | 4  | 4  | 0.04% | 9.09%  | LADALQ<br>ELR                      | 2.49 | 1,028.57 |
| Control | 6006 | Lamin A/C                                                                                           | gi 7435471 | 65,105.20 | 100.00% | 4  | 4  | 4  | 0.04% | 9.09%  | LQEKED<br>LQELND<br>R              | 4.86 | 1,629.81 |
| Control | 6006 | Lamin A/C                                                                                           | gi 7435471 | 65,105.20 | 100.00% | 4  | 4  | 4  | 0.04% | 9.09%  | MQQQLD<br>EYQELL<br>DIK            | 2.44 | 1,909.92 |
| Control | 6006 | serpin peptidase inhibitor, clade H (heat shock protein 47), member 1, (collagen binding protein 1) | gi 1140515 | 46,490.00 | 100.00% | 13 | 16 | 18 | 0.20% | 38.80% | AVAISLP<br>K                       | 2.05 | 798.5084 |
| Control | 6006 | serpin peptidase inhibitor, clade H (heat shock protein 47), member 1, (collagen binding protein 1) | gi 1140515 | 46,490.00 | 100.00% | 13 | 16 | 18 | 0.20% | 38.80% | AVLSAE<br>QLRDDE<br>VHAGLG<br>ELLR | 5.39 | 2,391.26 |

|         |      |                                                                                                                                         |                                                   |           |         |    |    |    |       |        |                                                 |          |
|---------|------|-----------------------------------------------------------------------------------------------------------------------------------------|---------------------------------------------------|-----------|---------|----|----|----|-------|--------|-------------------------------------------------|----------|
| Control | 6006 | serpin<br>peptidase<br>inhibitor,<br>clade H<br>(heat<br>shock<br>protein<br>47),<br>member<br>1,<br>(collagen<br>binding<br>protein 1) | gi 1140515<br>05,gi 11625<br>6076,gi 868<br>21084 | 46,490.00 | 100.00% | 13 | 16 | 18 | 0.20% | 38.80% | DQAVEN 4.61<br>ILLSPVV<br>VASSLG<br>LVSLGG<br>K | 2,565.45 |
| Control | 6006 | serpin<br>peptidase<br>inhibitor,<br>clade H<br>(heat<br>shock<br>protein<br>47),<br>member<br>1,<br>(collagen<br>binding<br>protein 1) | gi 1140515<br>05,gi 11625<br>6076,gi 868<br>21084 | 46,490.00 | 100.00% | 13 | 16 | 18 | 0.20% | 38.80% | DTQSGS 2.35<br>LLFIGR                           | 1,293.68 |
| Control | 6006 | serpin<br>peptidase<br>inhibitor,<br>clade H<br>(heat<br>shock<br>protein<br>47),<br>member<br>1,<br>(collagen<br>binding<br>protein 1) | gi 1140515<br>05,gi 11625<br>6076,gi 868<br>21084 | 46,490.00 | 100.00% | 13 | 16 | 18 | 0.20% | 38.80% | GVVEVT 3.84<br>HDLQK                            | 1,224.66 |
| Control | 6006 | serpin<br>peptidase<br>inhibitor,<br>clade H<br>(heat<br>shock<br>protein<br>47),<br>member<br>1,<br>(collagen<br>binding<br>protein 1) | gi 1140515<br>05,gi 11625<br>6076,gi 868<br>21084 | 46,490.00 | 100.00% | 13 | 16 | 18 | 0.20% | 38.80% | HLAGLG 4.99<br>LTEAIDK<br>NK                    | 1,579.88 |

|         |      |                                                                                                                                         |                                                   |           |         |    |    |    |       |        |                                      |          |
|---------|------|-----------------------------------------------------------------------------------------------------------------------------------------|---------------------------------------------------|-----------|---------|----|----|----|-------|--------|--------------------------------------|----------|
| Control | 6006 | serpin<br>peptidase<br>inhibitor,<br>clade H<br>(heat<br>shock<br>protein<br>47),<br>member<br>1,<br>(collagen<br>binding<br>protein 1) | gi 1140515<br>05,gi 11625<br>6076,gi 868<br>21084 | 46,490.00 | 100.00% | 13 | 16 | 18 | 0.20% | 38.80% | HLAGLG 3.8<br>LTEAIDK<br>NKADLS<br>R | 2,122.16 |
| Control | 6006 | serpin<br>peptidase<br>inhibitor,<br>clade H<br>(heat<br>shock<br>protein<br>47),<br>member<br>1,<br>(collagen<br>binding<br>protein 1) | gi 1140515<br>05,gi 11625<br>6076,gi 868<br>21084 | 46,490.00 | 100.00% | 13 | 16 | 18 | 0.20% | 38.80% | KAVAIISL 3.34<br>PK                  | 926.6034 |
| Control | 6006 | serpin<br>peptidase<br>inhibitor,<br>clade H<br>(heat<br>shock<br>protein<br>47),<br>member<br>1,<br>(collagen<br>binding<br>protein 1) | gi 1140515<br>05,gi 11625<br>6076,gi 868<br>21084 | 46,490.00 | 100.00% | 13 | 16 | 18 | 0.20% | 38.80% | LFYADH 2.86<br>PFIFLVR               | 1,637.88 |
| Control | 6006 | serpin<br>peptidase<br>inhibitor,<br>clade H<br>(heat<br>shock<br>protein<br>47),<br>member<br>1,<br>(collagen<br>binding<br>protein 1) | gi 1140515<br>05,gi 11625<br>6076,gi 868<br>21084 | 46,490.00 | 100.00% | 13 | 16 | 18 | 0.20% | 38.80% | LSSLIIM 2.64<br>PHHVEP<br>LER        | 2,000.10 |

|         |      |                                                                                                                                         |                                                   |           |         |    |    |    |       |        |                              |      |          |
|---------|------|-----------------------------------------------------------------------------------------------------------------------------------------|---------------------------------------------------|-----------|---------|----|----|----|-------|--------|------------------------------|------|----------|
| Control | 6006 | serpin<br>peptidase<br>inhibitor,<br>clade H<br>(heat<br>shock<br>protein<br>47),<br>member<br>1,<br>(collagen<br>binding<br>protein 1) | gi 1140515<br>05,gi 11625<br>6076,gi 868<br>21084 | 46,490.00 | 100.00% | 13 | 16 | 18 | 0.20% | 38.80% | LSSLIIIM<br>PHHVEP<br>LERLEK | 3.03 | 2,370.32 |
| Control | 6006 | serpin<br>peptidase<br>inhibitor,<br>clade H<br>(heat<br>shock<br>protein<br>47),<br>member<br>1,<br>(collagen<br>binding<br>protein 1) | gi 1140515<br>05,gi 11625<br>6076,gi 868<br>21084 | 46,490.00 | 100.00% | 13 | 16 | 18 | 0.20% | 38.80% | LYGPSS<br>VSFAED<br>FVR      | 3.29 | 1,673.82 |
| Control | 6006 | serpin<br>peptidase<br>inhibitor,<br>clade H<br>(heat<br>shock<br>protein<br>47),<br>member<br>1,<br>(collagen<br>binding<br>protein 1) | gi 1140515<br>05,gi 11625<br>6076,gi 868<br>21084 | 46,490.00 | 100.00% | 13 | 16 | 18 | 0.20% | 38.80% | SAGLAF<br>SLYQAM<br>AK       | 3.44 | 1,473.74 |
| Control | 6006 | PREDIC<br>TED:<br>transmem<br>brane<br>emp24<br>protein<br>transport<br>domain<br>containin<br>g 4                                      | gi 1946663<br>84                                  | 37,465.50 | 100.00% | 3  | 5  | 6  | 0.07% | 7.76%  | DKLTEL<br>QLR                | 2.87 | 1,115.64 |
| Control | 6006 | PREDIC<br>TED:<br>transmem<br>brane<br>emp24<br>protein<br>transport<br>domain<br>containin<br>g 4                                      | gi 1946663<br>84                                  | 37,465.50 | 100.00% | 3  | 5  | 6  | 0.07% | 7.76%  | QLLDQV<br>EQIQK              | 3.19 | 1,341.74 |

|         |      |                                                                                             |                                                           |            |         |    |    |    |       |        |                           |      |          |
|---------|------|---------------------------------------------------------------------------------------------|-----------------------------------------------------------|------------|---------|----|----|----|-------|--------|---------------------------|------|----------|
| Control | 6006 | PREDICTED:<br>transmembrane<br>emp24<br>protein<br>transport<br>domain<br>containing<br>g 4 | gi 194666384                                              | 37,465.50  | 100.00% | 3  | 5  | 6  | 0.07% | 7.76%  | QLLDQV<br>EIQKE<br>QDYQR  | 3.74 | 2,161.09 |
| Control | 6006 | NNT<br>protein                                                                              | gi 133777477,gi 163397,gi 163410,gi 172045566,gi 27806831 | 113,839.20 | 100.00% | 16 | 19 | 20 | 0.22% | 19.70% | AQYPIA<br>DLVK            | 2.22 | 1,117.63 |
| Control | 6006 | NNT<br>protein                                                                              | gi 133777477,gi 163397,gi 163410,gi 172045566,gi 27806831 | 113,839.20 | 100.00% | 16 | 19 | 20 | 0.22% | 19.70% | AVVLA<br>NHFR             | 2.45 | 1,154.64 |
| Control | 6006 | NNT<br>protein                                                                              | gi 133777477,gi 163397,gi 163410,gi 172045566,gi 27806831 | 113,839.20 | 100.00% | 16 | 19 | 20 | 0.22% | 19.70% | EVLAS<br>LVVK             | 2.25 | 1,072.62 |
| Control | 6006 | NNT<br>protein                                                                              | gi 133777477,gi 163397,gi 163410,gi 172045566,gi 27806831 | 113,839.20 | 100.00% | 16 | 19 | 20 | 0.22% | 19.70% | FFTQIT<br>AAGK            | 3.37 | 1,140.60 |
| Control | 6006 | NNT<br>protein                                                                              | gi 133777477,gi 163397,gi 163410,gi 172045566,gi 27806831 | 113,839.20 | 100.00% | 16 | 19 | 20 | 0.22% | 19.70% | GTVVM<br>KDGVI<br>FPAPTK  | 3.16 | 1,901.02 |
| Control | 6006 | NNT<br>protein                                                                              | gi 133777477,gi 163397,gi 163410,gi 172045566,gi 27806831 | 113,839.20 | 100.00% | 16 | 19 | 20 | 0.22% | 19.70% | ILIVGG<br>VAGLAS<br>AGAAK | 3.21 | 1,524.91 |
| Control | 6006 | NNT<br>protein                                                                              | gi 133777477,gi 163397,gi 163410,gi 172045566,gi 27806831 | 113,839.20 | 100.00% | 16 | 19 | 20 | 0.22% | 19.70% | MATQAS<br>TLYSNNI<br>TK   | 4.23 | 1,658.81 |
| Control | 6006 | NNT<br>protein                                                                              | gi 133777477,gi 163397,gi 163410,gi 172045566,gi 27806831 | 113,839.20 | 100.00% | 16 | 19 | 20 | 0.22% | 19.70% | RVALSP<br>AGVQAL<br>VK    | 2.96 | 1,408.86 |
| Control | 6006 | NNT<br>protein                                                                              | gi 133777477,gi 163397,gi 163410,gi 172045566,gi 27806831 | 113,839.20 | 100.00% | 16 | 19 | 20 | 0.22% | 19.70% | SAPLLL<br>GR              | 2.04 | 923.5674 |
| Control | 6006 | NNT<br>protein                                                                              | gi 133777477,gi 163397,gi 163410,gi 172045566,gi 27806831 | 113,839.20 | 100.00% | 16 | 19 | 20 | 0.22% | 19.70% | SLGAEPL<br>EVDLK          | 2.69 | 1,270.69 |



|         |      |                                                          |                                                                               |            |         |    |    |    |       |        |                                                   |          |
|---------|------|----------------------------------------------------------|-------------------------------------------------------------------------------|------------|---------|----|----|----|-------|--------|---------------------------------------------------|----------|
| Control | 6006 | NNT protein                                              | gi 1337774<br>77,gi 16339<br>7,gi 163410<br>.gi 1720455<br>66,gi 27806<br>831 | 113,839.20 | 100.00% | 16 | 19 | 20 | 0.22% | 19.70% | SLGVGY 4.34<br>AAVDNP<br>IFYKPNT<br>AMLLGD<br>AK  | 2,841.45 |
| Control | 6006 | NNT protein                                              | gi 1337774<br>77,gi 16339<br>7,gi 163410<br>.gi 1720455<br>66,gi 27806<br>831 | 113,839.20 | 100.00% | 16 | 19 | 20 | 0.22% | 19.70% | SLGVGY 3.72<br>AAVDNP<br>IFYKPNT<br>AMLLGD<br>AKK | 2,969.54 |
| Control | 6006 | NNT protein                                              | gi 1337774<br>77,gi 16339<br>7,gi 163410<br>.gi 1720455<br>66,gi 27806<br>831 | 113,839.20 | 100.00% | 16 | 19 | 20 | 0.22% | 19.70% | TSGTLIS 2.27<br>FIYPAQN<br>PDLLNK                 | 2,192.16 |
| Control | 6006 | NNT protein                                              | gi 1337774<br>77,gi 16339<br>7,gi 163410<br>.gi 1720455<br>66,gi 27806<br>831 | 113,839.20 | 100.00% | 16 | 19 | 20 | 0.22% | 19.70% | TVAELE 3.05<br>AEKAATI<br>TPFRK                   | 1,975.09 |
| Control | 6006 | NNT protein                                              | gi 1337774<br>77,gi 16339<br>7,gi 163410<br>.gi 1720455<br>66,gi 27806<br>831 | 113,839.20 | 100.00% | 16 | 19 | 20 | 0.22% | 19.70% | VALSPA 5.35<br>GVQALV<br>K                        | 1,252.76 |
| Control | 6006 | NNT protein                                              | gi 1337774<br>77,gi 16339<br>7,gi 163410<br>.gi 1720455<br>66,gi 27806<br>831 | 113,839.20 | 100.00% | 16 | 19 | 20 | 0.22% | 19.70% | VTIAQG 4.43<br>YDALSS<br>MANIAG<br>YK             | 2,089.03 |
| Control | 6006 | Transmembrane emp24-like traffickin g protein 10 (yeast) | gi 1337781<br>87,gi 59858<br>463,gi 6290<br>1402,gi 949<br>66895              | 24,810.80  | 100.00% | 9  | 16 | 22 | 0.24% | 33.30% | IPDQLVI 4.04<br>LDMK                              | 1,300.72 |
| Control | 6006 | Transmembrane emp24-like traffickin g protein 10 (yeast) | gi 1337781<br>87,gi 59858<br>463,gi 6290<br>1402,gi 949<br>66895              | 24,810.80  | 100.00% | 9  | 16 | 22 | 0.24% | 33.30% | IPDQLVI 3.92<br>LDMKHG<br>VEAK                    | 1,922.04 |
| Control | 6006 | Transmembrane emp24-like traffickin g protein 10 (yeast) | gi 1337781<br>87,gi 59858<br>463,gi 6290<br>1402,gi 949<br>66895              | 24,810.80  | 100.00% | 9  | 16 | 22 | 0.24% | 33.30% | ITDSAGH 3.66<br>ILYSK                             | 1,304.68 |
| Control | 6006 | Transmembrane emp24-like traffickin g protein 10 (yeast) | gi 1337781<br>87,gi 59858<br>463,gi 6290<br>1402,gi 949<br>66895              | 24,810.80  | 100.00% | 9  | 16 | 22 | 0.24% | 33.30% | ITDSAGH 3.78<br>ILYSKED<br>ATK                    | 1,848.93 |

|         |      |                                                                     |                                                  |            |         |   |    |    |       |        |                                                   |          |
|---------|------|---------------------------------------------------------------------|--------------------------------------------------|------------|---------|---|----|----|-------|--------|---------------------------------------------------|----------|
| Control | 6006 | Transmembrane emp24-like traffickin g protein 10 (yeast)            | gi 133778187,gi 59858463,gi 62901402,gi 94966895 | 24,810.80  | 100.00% | 9 | 16 | 22 | 0.24% | 33.30% | ITDSAGH 3.88<br>ILYSKED<br>ATKGK                  | 2,034.05 |
| Control | 6006 | Transmembrane emp24-like traffickin g protein 10 (yeast)            | gi 133778187,gi 59858463,gi 62901402,gi 94966895 | 24,810.80  | 100.00% | 9 | 16 | 22 | 0.24% | 33.30% | LKPLEV 3.58<br>ELR                                | 1,096.67 |
| Control | 6006 | Transmembrane emp24-like traffickin g protein 10 (yeast)            | gi 133778187,gi 59858463,gi 62901402,gi 94966895 | 24,810.80  | 100.00% | 9 | 16 | 22 | 0.24% | 33.30% | NYEEIA 2.49<br>KVEK                               | 1,222.63 |
| Control | 6006 | Transmembrane emp24-like traffickin g protein 10 (yeast)            | gi 133778187,gi 59858463,gi 62901402,gi 94966895 | 24,810.80  | 100.00% | 9 | 16 | 22 | 0.24% | 33.30% | RLEDLSE 3.26<br>SIVNDFA<br>YMK                    | 2,045.99 |
| Control | 6006 | Transmembrane emp24-like traffickin g protein 10 (yeast)            | gi 133778187,gi 59858463,gi 62901402,gi 94966895 | 24,810.80  | 100.00% | 9 | 16 | 22 | 0.24% | 33.30% | RLEDLSE 5.42<br>SIVNDFA<br>YMKK                   | 2,174.08 |
| Control | 6006 | signal recognition particle receptor                                | gi 115497558,gi 122139924,gi 75773717            | 69,879.80  | 99.90%  | 2 | 2  | 2  | 0.02% | 6.57%  | LITVNTP 3.51<br>DLVLFV<br>GEALVG<br>NEAVDQ<br>LVK | 2,966.65 |
| Control | 6006 | signal recognition particle receptor                                | gi 115497558,gi 122139924,gi 75773717            | 69,879.80  | 99.90%  | 2 | 2  | 2  | 0.02% | 6.57%  | NQGFDV 3.8<br>VLVDTA<br>GR                        | 1,490.76 |
| Control | 6006 | solute carrier family 4, sodium bicarbonate cotransporter, member 7 | gi 219282724                                     | 135,822.00 | 100.00% | 4 | 4  | 4  | 0.04% | 6.16%  | FLFLLG 3.27<br>PAGK                               | 1,175.72 |
| Control | 6006 | solute carrier family 4, sodium bicarbonate cotransporter, member 7 | gi 219282724                                     | 135,822.00 | 100.00% | 4 | 4  | 4  | 0.04% | 6.16%  | KIPSGAE 3.3<br>ASNVLV<br>GEVDFL<br>ERPIAF<br>VR   | 3,026.67 |

|         |      |                                                                     |                                                 |            |         |   |   |   |       |        |                                              |      |          |
|---------|------|---------------------------------------------------------------------|-------------------------------------------------|------------|---------|---|---|---|-------|--------|----------------------------------------------|------|----------|
| Control | 6006 | solute carrier family 4, sodium bicarbonate cotransporter, member 7 | gi 2192827                                      | 135,822.00 | 100.00% | 4 | 4 | 4 | 0.04% | 6.16%  | LAPAVL<br>LSGLTE<br>VPVPTR                   | 2.74 | 1,833.08 |
| Control | 6006 | solute carrier family 4, sodium bicarbonate cotransporter, member 7 | gi 2192827                                      | 135,822.00 | 100.00% | 4 | 4 | 4 | 0.04% | 6.16%  | TSSTVN<br>TKFEKE<br>ELESHR                   | 2.4  | 2,122.04 |
| Control | 6006 | emerin                                                              | gi 3778118<br>6,gi 427336<br>00,gi 74356<br>375 | 29,454.80  | 100.00% | 5 | 7 | 7 | 0.08% | 28.40% | FSDLDS<br>ASVDSD<br>MYDLPK                   | 2.87 | 2,020.87 |
| Control | 6006 | emerin                                                              | gi 3778118<br>6,gi 427336<br>00,gi 74356<br>375 | 29,454.80  | 100.00% | 5 | 7 | 7 | 0.08% | 28.40% | FSDLDS<br>ASVDSD<br>MYDLPK<br>KEDALL<br>YQSK | 5.94 | 3,196.49 |
| Control | 6006 | emerin                                                              | gi 3778118<br>6,gi 427336<br>00,gi 74356<br>375 | 29,454.80  | 100.00% | 5 | 7 | 7 | 0.08% | 28.40% | GFRQPS<br>ASLSDA<br>DPFHR                    | 4.25 | 1,887.91 |
| Control | 6006 | emerin                                                              | gi 3778118<br>6,gi 427336<br>00,gi 74356<br>375 | 29,454.80  | 100.00% | 5 | 7 | 7 | 0.08% | 28.40% | GYNDDY<br>YEESYL<br>TTR                      | 3.21 | 1,888.79 |
| Control | 6006 | emerin                                                              | gi 3778118<br>6,gi 427336<br>00,gi 74356<br>375 | 29,454.80  | 100.00% | 5 | 7 | 7 | 0.08% | 28.40% | QYNIPH<br>GPVVG<br>S<br>TR                   | 2.05 | 1,524.79 |
| Control | 6006 | RecName : Full=Ras-related protein Rab-7a                           | gi 1088609<br>19,gi 74354                       | 23,526.10  | 100.00% | 5 | 5 | 6 | 0.07% | 24.20% | ATIGADF<br>LTK                               | 2.77 | 1,036.57 |
| Control | 6006 | RecName : Full=Ras-related protein Rab-7a                           | gi 1088609<br>19,gi 74354                       | 23,526.10  | 100.00% | 5 | 5 | 6 | 0.07% | 24.20% | DPENFPF<br>VVLGNK                            | 3.58 | 1,475.75 |
| Control | 6006 | RecName : Full=Ras-related protein Rab-7a                           | gi 1088609<br>19,gi 74354                       | 23,526.10  | 100.00% | 5 | 5 | 6 | 0.07% | 24.20% | DPENFPF<br>VVLGNK<br>IDLENR                  | 4.27 | 2,216.13 |
| Control | 6006 | RecName : Full=Ras-related protein Rab-7a                           | gi 1088609<br>19,gi 74354                       | 23,526.10  | 100.00% | 5 | 5 | 6 | 0.07% | 24.20% | FQSLGV<br>AFYR                               | 2.89 | 1,187.62 |

|         |      |                                                                                  |                                                     |         |    |    |    |       |        |                                     |      |          |
|---------|------|----------------------------------------------------------------------------------|-----------------------------------------------------|---------|----|----|----|-------|--------|-------------------------------------|------|----------|
| Control | 6006 | RecName gi 1088609 :<br>19,gi 74354<br>Full=Ras-<br>related<br>protein<br>Rab-7a | 23,526.10                                           | 100.00% | 5  | 5  | 6  | 0.07% | 24.20% | VIIIGDS<br>GVGK                     | 2.63 | 1,057.63 |
| Control | 6006 | heat shock<br>70kDa<br>protein 8                                                 | gi 1462317<br>04 71,224.20                          | 100.00% | 11 | 14 | 14 | 0.15% | 24.20% | ARFEEL<br>NADLFR                    | 3.83 | 1,480.75 |
| Control | 6006 | heat shock<br>70kDa<br>protein 8                                                 | gi 1462317<br>04 71,224.20                          | 100.00% | 11 | 14 | 14 | 0.15% | 24.20% | FEELNA<br>DLFR                      | 3.11 | 1,253.62 |
| Control | 6006 | heat shock<br>70kDa<br>protein 8                                                 | gi 1462317<br>04 71,224.20                          | 100.00% | 11 | 14 | 14 | 0.15% | 24.20% | IINEPTA<br>AAIAYG<br>LDKK           | 2.97 | 1,787.99 |
| Control | 6006 | heat shock<br>70kDa<br>protein 8                                                 | gi 1462317<br>04 71,224.20                          | 100.00% | 11 | 14 | 14 | 0.15% | 24.20% | LDKSQIH<br>DIVLVG<br>GSTR           | 4.19 | 1,838.01 |
| Control | 6006 | heat shock<br>70kDa<br>protein 8                                                 | gi 1462317<br>04 71,224.20                          | 100.00% | 11 | 14 | 14 | 0.15% | 24.20% | NQVAM<br>NPTNTV<br>FDAQ             | 3.34 | 1,665.79 |
| Control | 6006 | heat shock<br>70kDa<br>protein 8                                                 | gi 1462317<br>04 71,224.20                          | 100.00% | 11 | 14 | 14 | 0.15% | 24.20% | NSLESY<br>AFNMK                     | 3.42 | 1,319.59 |
| Control | 6006 | heat shock<br>70kDa<br>protein 8                                                 | gi 1462317<br>04 71,224.20                          | 100.00% | 11 | 14 | 14 | 0.15% | 24.20% | QTQTFT<br>TYSNQ<br>PGVLIQV<br>YEGER | 4.42 | 2,774.33 |
| Control | 6006 | heat shock<br>70kDa<br>protein 8                                                 | gi 1462317<br>04 71,224.20                          | 100.00% | 11 | 14 | 14 | 0.15% | 24.20% | SFYPEEV<br>SSMVL<br>K               | 2.64 | 1,632.78 |
| Control | 6006 | heat shock<br>70kDa<br>protein 8                                                 | gi 1462317<br>04 71,224.20                          | 100.00% | 11 | 14 | 14 | 0.15% | 24.20% | STAGDT<br>HLGGED<br>FDNR            | 3.13 | 1,691.73 |
| Control | 6006 | heat shock<br>70kDa<br>protein 8                                                 | gi 1462317<br>04 71,224.20                          | 100.00% | 11 | 14 | 14 | 0.15% | 24.20% | TTPSYV<br>AFTDTE<br>R               | 2.87 | 1,487.70 |
| Control | 6006 | heat shock<br>70kDa<br>protein 8                                                 | gi 1462317<br>04 71,224.20                          | 100.00% | 11 | 14 | 14 | 0.15% | 24.20% | TVTNAV<br>VTVPAY<br>FNDSQR          | 3.03 | 1,982.00 |
| Control | 6006 | solute carrier family 25, member A6                                              | gi 1199365 :<br>93,gi 15155<br>7097,gi 321<br>89336 | 100.00% | 11 | 16 | 29 | 0.32% | 32.60% | AAAYFGI<br>YDTAK                    | 3.61 | 1,219.60 |
| Control | 6006 | solute carrier family 25, member A6                                              | gi 1199365 :<br>93,gi 15155<br>7097,gi 321<br>89336 | 100.00% | 11 | 16 | 29 | 0.32% | 32.60% | DFLAGGI<br>AAAISK                   | 4.83 | 1,233.68 |
| Control | 6006 | solute carrier family 25, member A6                                              | gi 1199365 :<br>93,gi 15155<br>7097,gi 321<br>89336 | 100.00% | 11 | 16 | 29 | 0.32% | 32.60% | DKYKQI<br>FLGGVD<br>K               | 3.69 | 1,510.83 |

|         |      |                                                  |                                       |            |         |    |    |    |       |        |                       |      |          |
|---------|------|--------------------------------------------------|---------------------------------------|------------|---------|----|----|----|-------|--------|-----------------------|------|----------|
| Control | 6006 | solute carrier family 25, member A6              | gi 119936593,gi 151557097,gi 32189336 | 32,860.40  | 100.00% | 11 | 16 | 29 | 0.32% | 32.60% | GLYQGF NVSVQG IIIYR   | 2.95 | 1,927.04 |
| Control | 6006 | solute carrier family 25, member A6              | gi 119936593,gi 151557097,gi 32189336 | 32,860.40  | 100.00% | 11 | 16 | 29 | 0.32% | 32.60% | GMGGAF VLVLYD ELKK    | 3.66 | 1,755.94 |
| Control | 6006 | solute carrier family 25, member A6              | gi 119936593,gi 151557097,gi 32189336 | 32,860.40  | 100.00% | 11 | 16 | 29 | 0.32% | 32.60% | GMGGAF VLVLYD ELKKVI  | 2.43 | 1,968.09 |
| Control | 6006 | solute carrier family 25, member A6              | gi 119936593,gi 151557097,gi 32189336 | 32,860.40  | 100.00% | 11 | 16 | 29 | 0.32% | 32.60% | QIFLGGV DKR           | 2.39 | 1,132.65 |
| Control | 6006 | solute carrier family 25, member A6              | gi 119936593,gi 151557097,gi 32189336 | 32,860.40  | 100.00% | 11 | 16 | 29 | 0.32% | 32.60% | VKLLLQ VQHASK         | 4.01 | 1,363.84 |
| Control | 6006 | solute carrier family 25, member A6              | gi 119936593,gi 151557097,gi 32189336 | 32,860.40  | 100.00% | 11 | 16 | 29 | 0.32% | 32.60% | YFPTQA LNFAFK         | 4.78 | 1,446.74 |
| Control | 6006 | solute carrier family 25, member A6              | gi 119936593,gi 151557097,gi 32189336 | 32,860.40  | 100.00% | 11 | 16 | 29 | 0.32% | 32.60% | YFPTQA LNFAFK DK      | 3.72 | 1,689.86 |
| Control | 6006 | solute carrier family 25, member A6              | gi 119936593,gi 151557097,gi 32189336 | 32,860.40  | 100.00% | 11 | 16 | 29 | 0.32% | 32.60% | YFPTQA LNFAFK DKYK    | 3.76 | 1,981.02 |
| Control | 6006 | PREDICTED: insulin-like growth factor 1 receptor | gi 119913553                          | 135,693.80 | 100.00% | 3  | 4  | 4  | 0.04% | 4.15%  | ELGQGS FGMVYE GVAK    | 3.03 | 1,687.80 |
| Control | 6006 | PREDICTED: insulin-like growth factor 1 receptor | gi 119913553                          | 135,693.80 | 100.00% | 3  | 4  | 4  | 0.04% | 4.15%  | SLRPEM ENNPVL APPSLSK | 3.25 | 2,095.09 |
| Control | 6006 | PREDICTED: insulin-like growth factor 1 receptor | gi 119913553                          | 135,693.80 | 100.00% | 3  | 4  | 4  | 0.04% | 4.15%  | TEAEKQ AEKEEA EYR     | 2.01 | 1,810.85 |

|         |      |                                                                                                         |                  |            |         |   |   |   |       |       |                          |      |          |
|---------|------|---------------------------------------------------------------------------------------------------------|------------------|------------|---------|---|---|---|-------|-------|--------------------------|------|----------|
| Control | 6006 | PREDIC<br>TED:<br>similar to<br>filamin<br>B, beta<br>(actin<br>binding<br>protein<br>278)<br>isoform 7 | gi 1946772<br>96 | 277,977.20 | 100.00% | 9 | 9 | 9 | 0.10% | 4.73% | EAFITNK<br>PNVFTV<br>VTR | 3.01 | 1,722.92 |
| Control | 6006 | PREDIC<br>TED:<br>similar to<br>filamin<br>B, beta<br>(actin<br>binding<br>protein<br>278)<br>isoform 7 | gi 1946772<br>96 | 277,977.20 | 100.00% | 9 | 9 | 9 | 0.10% | 4.73% | FADEHV<br>PGSPFTV<br>K   | 2.89 | 1,530.76 |
| Control | 6006 | PREDIC<br>TED:<br>similar to<br>filamin<br>B, beta<br>(actin<br>binding<br>protein<br>278)<br>isoform 7 | gi 1946772<br>96 | 277,977.20 | 100.00% | 9 | 9 | 9 | 0.10% | 4.73% | IVGPGLG<br>SGVR          | 2.57 | 1,011.59 |
| Control | 6006 | PREDIC<br>TED:<br>similar to<br>filamin<br>B, beta<br>(actin<br>binding<br>protein<br>278)<br>isoform 7 | gi 1946772<br>96 | 277,977.20 | 100.00% | 9 | 9 | 9 | 0.10% | 4.73% | LIALLEV<br>LSQK          | 2.52 | 1,226.77 |
| Control | 6006 | PREDIC<br>TED:<br>similar to<br>filamin<br>B, beta<br>(actin<br>binding<br>protein<br>278)<br>isoform 7 | gi 1946772<br>96 | 277,977.20 | 100.00% | 9 | 9 | 9 | 0.10% | 4.73% | SPFTVG<br>VAAPLD<br>LSR  | 3.96 | 1,529.83 |
| Control | 6006 | PREDIC<br>TED:<br>similar to<br>filamin<br>B, beta<br>(actin<br>binding<br>protein<br>278)<br>isoform 7 | gi 1946772<br>96 | 277,977.20 | 100.00% | 9 | 9 | 9 | 0.10% | 4.73% | VLFASQ<br>EIPSPF<br>R    | 2.94 | 1,591.85 |
| Control | 6006 | PREDIC<br>TED:<br>similar to<br>filamin<br>B, beta<br>(actin<br>binding<br>protein<br>278)<br>isoform 7 | gi 1946772<br>96 | 277,977.20 | 100.00% | 9 | 9 | 9 | 0.10% | 4.73% | VSFAGD<br>TIPK           | 2.64 | 1,034.55 |

|         |      |                                                                                                     |                                                                 |            |         |   |   |   |       |       |                                                  |          |
|---------|------|-----------------------------------------------------------------------------------------------------|-----------------------------------------------------------------|------------|---------|---|---|---|-------|-------|--------------------------------------------------|----------|
| Control | 6006 | PREDICTED:<br>similar to<br>filamin<br>B, beta<br>(actin<br>binding<br>protein<br>278)<br>isoform 7 | gi 1946772<br>96                                                | 277,977.20 | 100.00% | 9 | 9 | 9 | 0.10% | 4.73% | VTEAEIV 2.88<br>PVGK                             | 1,141.65 |
| Control | 6006 | PREDICTED:<br>similar to<br>filamin<br>B, beta<br>(actin<br>binding<br>protein<br>278)<br>isoform 7 | gi 1946772<br>96                                                | 277,977.20 | 100.00% | 9 | 9 | 9 | 0.10% | 4.73% | YTPTQQ 3.56<br>GNMQVL<br>VTYGGD<br>PIPK          | 2,423.19 |
| Control | 6006 | plasma membrane calcium-55 transporter ATPase                                                       | gi 1458276<br>2,gi 278072                                       | 134,738.10 | 100.00% | 3 | 3 | 3 | 0.03% | 7.05% | EAGHGT 3.88<br>QKEEIP<br>EELAED<br>VEEIDH<br>AER | 3,189.45 |
| Control | 6006 | plasma membrane calcium-55 transporter ATPase                                                       | gi 1458276<br>2,gi 278072                                       | 134,738.10 | 100.00% | 3 | 3 | 3 | 0.03% | 7.05% | GIIDSTV 2.88<br>SEQR                             | 1,204.62 |
| Control | 6006 | plasma membrane calcium-55 transporter ATPase                                                       | gi 1458276<br>2,gi 278072                                       | 134,738.10 | 100.00% | 3 | 3 | 3 | 0.03% | 7.05% | KADVGF 3.83<br>AMGIAG<br>TDVAK                   | 1,666.85 |
| Control | 6006 | plasma membrane calcium-55 transporter ATPase                                                       | gi 1458276<br>2,gi 278072                                       | 134,738.10 | 100.00% | 3 | 3 | 3 | 0.03% | 7.05% | QVVAVT 3.97<br>GDGTND<br>GPALK                   | 1,641.84 |
| Control | 6006 | plasma membrane calcium-55 transporter ATPase                                                       | gi 1458276<br>2,gi 278072                                       | 134,738.10 | 100.00% | 3 | 3 | 3 | 0.03% | 7.05% | QVVAVT 2.95<br>GDGTND<br>GPALKK                  | 1,769.94 |
| Control | 6006 | plasma membrane calcium-55 transporter ATPase                                                       | gi 1458276<br>2,gi 278072                                       | 134,738.10 | 100.00% | 3 | 3 | 3 | 0.03% | 7.05% | SSLYEGL 3.6<br>EKPESR                            | 1,494.74 |
| Control | 6006 | UNC84B protein 1283                                                                                 | gi 1515539<br>17,gi 15612<br>1283                               | 81,429.80  | 100.00% | 2 | 3 | 3 | 0.03% | 4.26% | IRPTAVT 3.88<br>LEHVPK                           | 1,460.86 |
| Control | 6006 | UNC84B protein 1283                                                                                 | gi 1515539<br>17,gi 15612<br>1283                               | 81,429.80  | 100.00% | 2 | 3 | 3 | 0.03% | 4.26% | LEGQLA 3.07<br>GLRQEL<br>AALTLK                  | 1,924.12 |
| Control | 6006 | MYO1C protein 9868                                                                                  | gi 1461865<br>25,gi 14790<br>6576,gi 397<br>403,gi 9010<br>9868 | 118,133.10 | 100.00% | 3 | 5 | 5 | 0.05% | 4.28% | DQAVMI 3.01<br>SGESGA<br>GKTEAT<br>KR            | 2,052.00 |

|         |      |                                                           |                                                 |            |         |   |    |    |       |        |                                              |      |          |
|---------|------|-----------------------------------------------------------|-------------------------------------------------|------------|---------|---|----|----|-------|--------|----------------------------------------------|------|----------|
| Control | 6006 | MYO1C protein                                             | gi 146186525,gi 147906576,gi 397403,gi 90109868 | 118,133.10 | 100.00% | 3 | 5  | 5  | 0.05% | 4.28%  | HLGYKP<br>EEYKMG<br>R                        | 2.58 | 1,623.80 |
| Control | 6006 | MYO1C protein                                             | gi 146186525,gi 147906576,gi 397403,gi 90109868 | 118,133.10 | 100.00% | 3 | 5  | 5  | 0.05% | 4.28%  | MSLLEL<br>VEILK                              | 2.77 | 1,303.75 |
| Control | 6006 | PREDICTED: similar to Ras-interacting protein 1 isoform 2 | gi 76642189                                     | 103,383.20 | 99.80%  | 2 | 2  | 2  | 0.02% | 4.36%  | AASGGA<br>ALASPG<br>PGSGSG<br>TPAGSG<br>GKER | 3.89 | 2,312.12 |
| Control | 6006 | PREDICTED: similar to Ras-interacting protein 1 isoform 2 | gi 76642189                                     | 103,383.20 | 99.80%  | 2 | 2  | 2  | 0.02% | 4.36%  | LSLTGPV<br>TDDALH<br>R                       | 2.44 | 1,494.79 |
| Control | 6006 | PREDICTED: NOMO3-like protein isoform 2                   | gi 119916799,gi 119916801                       | 134,079.40 | 100.00% | 3 | 3  | 3  | 0.03% | 3.27%  | GQPLGP<br>AGVQVS<br>LR                       | 2.55 | 1,378.78 |
| Control | 6006 | PREDICTED: NOMO3-like protein isoform 2                   | gi 119916799,gi 119916801                       | 134,079.40 | 100.00% | 3 | 3  | 3  | 0.03% | 3.27%  | SSIDSEP<br>ALVLGP<br>LK                      | 2.93 | 1,525.85 |
| Control | 6006 | PREDICTED: NOMO3-like protein isoform 2                   | gi 119916799,gi 119916801                       | 134,079.40 | 100.00% | 3 | 3  | 3  | 0.03% | 3.27%  | VQVMVP<br>EAETR                              | 3.13 | 1,274.64 |
| Control | 6006 | vesicle-associated membrane protein 3                     | gi 114052342,gi 122136203,gi 86822282           | 11,517.30  | 100.00% | 6 | 10 | 10 | 0.11% | 51.00% | ADALQA<br>GASQFE<br>TSAAK                    | 3.99 | 1,665.81 |
| Control | 6006 | vesicle-associated membrane protein 3                     | gi 114052342,gi 122136203,gi 86822282           | 11,517.30  | 100.00% | 6 | 10 | 10 | 0.11% | 51.00% | DQKLSE<br>LDDRAD<br>ALQAGA<br>SQFETSA<br>AK  | 5.68 | 2,865.39 |
| Control | 6006 | vesicle-associated membrane protein 3                     | gi 114052342,gi 122136203,gi 86822282           | 11,517.30  | 100.00% | 6 | 10 | 10 | 0.11% | 51.00% | LQQTQN<br>QVDEVV<br>DIMR                     | 4.27 | 1,931.95 |
| Control | 6006 | vesicle-associated membrane protein 3                     | gi 114052342,gi 122136203,gi 86822282           | 11,517.30  | 100.00% | 6 | 10 | 10 | 0.11% | 51.00% | LSELDD<br>RADALQ<br>AGASQF<br>ETSAAK         | 5.88 | 2,494.21 |



|         |      |                                                            |                                                 |            |         |   |    |    |       |        |                                |      |          |
|---------|------|------------------------------------------------------------|-------------------------------------------------|------------|---------|---|----|----|-------|--------|--------------------------------|------|----------|
| Control | 6006 | vesicle-associated membrane protein 3                      | gi 114052342,gi 122136203,gi 86822282           | 11,517.30  | 100.00% | 6 | 10 | 10 | 0.11% | 51.00% | RLQQTQ<br>NQVDEV<br>VDIMR      | 4.65 | 2,088.05 |
| Control | 6006 | vesicle-associated membrane protein 3                      | gi 114052342,gi 122136203,gi 86822282           | 11,517.30  | 100.00% | 6 | 10 | 10 | 0.11% | 51.00% | VNVDKV<br>LER                  | 2.49 | 1,071.62 |
| Control | 6006 | transmembrane emp24 protein transport domain containin g 9 | gi 59858491,gi 74267997,gi 77736600,gi 81175032 | 27,280.40  | 100.00% | 5 | 8  | 11 | 0.12% | 16.20% | DKLSEL<br>QLR                  | 3.7  | 1,101.63 |
| Control | 6006 | transmembrane emp24 protein transport domain containin g 9 | gi 59858491,gi 74267997,gi 77736600,gi 81175032 | 27,280.40  | 100.00% | 5 | 8  | 11 | 0.12% | 16.20% | FSLFAG<br>GMLR                 | 3.01 | 1,114.57 |
| Control | 6006 | transmembrane emp24 protein transport domain containin g 9 | gi 59858491,gi 74267997,gi 77736600,gi 81175032 | 27,280.40  | 100.00% | 5 | 8  | 11 | 0.12% | 16.20% | QLVEQV<br>EQIQK                | 3.52 | 1,341.74 |
| Control | 6006 | transmembrane emp24 protein transport domain containin g 9 | gi 59858491,gi 74267997,gi 77736600,gi 81175032 | 27,280.40  | 100.00% | 5 | 8  | 11 | 0.12% | 16.20% | QLVEQV<br>EQIQKE<br>QNYQR      | 4    | 2,160.10 |
| Control | 6006 | transmembrane emp24 protein transport domain containin g 9 | gi 59858491,gi 74267997,gi 77736600,gi 81175032 | 27,280.40  | 100.00% | 5 | 8  | 11 | 0.12% | 16.20% | VRQLVE<br>QVEIQ<br>KEQNYQ<br>R | 3.64 | 2,415.27 |
| Control | 6006 | PCDH1 protein                                              | gi 134025143,gi 139947544                       | 114,931.40 | 99.80%  | 2 | 2  | 2  | 0.02% | 3.58%  | NTGLITV<br>QGPVDR<br>EDLSTLR   | 2.19 | 2,184.16 |
| Control | 6006 | PCDH1 protein                                              | gi 134025143,gi 139947544                       | 114,931.40 | 99.80%  | 2 | 2  | 2  | 0.02% | 3.58%  | SPKPVK<br>PVEDED<br>ETGLQK     | 4.57 | 1,996.02 |
| Control | 6006 | KRT4 protein                                               | gi 134024768                                    | 58,029.30  | 99.80%  | 2 | 2  | 5  | 0.05% | 5.10%  | FASFIDK<br>VR                  | 1.63 | 1,082.60 |
| Control | 6006 | KRT4 protein                                               | gi 134024768                                    | 58,029.30  | 99.80%  | 2 | 2  | 5  | 0.05% | 5.10%  | LALDIEI<br>ATYR                | 4.18 | 1,277.71 |
| Control | 6006 | KRT4 protein                                               | gi 134024768                                    | 58,029.30  | 99.80%  | 2 | 2  | 5  | 0.05% | 5.10%  | NEISELN<br>R                   | 3.36 | 974.4901 |

|         |      |                                                                                       |                           |           |         |    |    |    |       |        |                                             |          |
|---------|------|---------------------------------------------------------------------------------------|---------------------------|-----------|---------|----|----|----|-------|--------|---------------------------------------------|----------|
| Control | 6006 | PREDICTED: similar to solute carrier family 30 (zinc transporter), member 1 isoform 1 | gi 76638149               | 55,359.70 | 99.80%  | 2  | 2  | 2  | 0.02% | 7.51%  | ESALILL 2.12<br>QTVPK                       | 1,311.79 |
| Control | 6006 | PREDICTED: similar to solute carrier family 30 (zinc transporter), member 1 isoform 1 | gi 76638149               | 55,359.70 | 99.80%  | 2  | 2  | 2  | 0.02% | 7.51%  | IIKDVFH 2.43<br>NHGIHA<br>TTIQPEF<br>ASVGSK | 2,846.50 |
| Control | 6006 | RAB1A, member 48 RAS oncogene family                                                  | gi 120419448              | 22,660.40 | 100.00% | 4  | 5  | 7  | 0.08% | 25.90% | EFADSL 2.93<br>GIPFLET<br>SAK               | 1,724.87 |
| Control | 6006 | RAB1A, member 48 RAS oncogene family                                                  | gi 120419448              | 22,660.40 | 100.00% | 4  | 5  | 7  | 0.08% | 25.90% | KVVDYT 3.51<br>TAKEFA<br>DSLGIPF<br>LETSK   | 2,730.42 |
| Control | 6006 | RAB1A, member 48 RAS oncogene family                                                  | gi 120419448              | 22,660.40 | 100.00% | 4  | 5  | 7  | 0.08% | 25.90% | LLIGDS 3.31<br>GVGK                         | 1,071.64 |
| Control | 6006 | RAB1A, member 48 RAS oncogene family                                                  | gi 120419448              | 22,660.40 | 100.00% | 4  | 5  | 7  | 0.08% | 25.90% | NATNVE 3.66<br>QSFMTM<br>AAEIK              | 1,900.88 |
| Control | 6006 | LMNB1 protein                                                                         | gi 154425605,gi 157074106 | 66,404.60 | 100.00% | 15 | 22 | 25 | 0.27% | 32.30% | ALYETE 2.29<br>LADAR                        | 1,251.62 |
| Control | 6006 | LMNB1 protein                                                                         | gi 154425605,gi 157074106 | 66,404.60 | 100.00% | 15 | 22 | 25 | 0.27% | 32.30% | FKAEHD 2.6<br>QLLLNY<br>AK                  | 1,689.90 |
| Control | 6006 | LMNB1 protein                                                                         | gi 154425605,gi 157074106 | 66,404.60 | 100.00% | 15 | 22 | 25 | 0.27% | 32.30% | IESLSSQ 3.69<br>LSNLQK                      | 1,446.78 |
| Control | 6006 | LMNB1 protein                                                                         | gi 154425605,gi 157074106 | 66,404.60 | 100.00% | 15 | 22 | 25 | 0.27% | 32.30% | IQELEDL 2.44<br>LAKER                       | 1,456.80 |
| Control | 6006 | LMNB1 protein                                                                         | gi 154425605,gi 157074106 | 66,404.60 | 100.00% | 15 | 22 | 25 | 0.27% | 32.30% | KLLEGE 3.53<br>EERLK                        | 1,343.75 |
| Control | 6006 | LMNB1 protein                                                                         | gi 154425605,gi 157074106 | 66,404.60 | 100.00% | 15 | 22 | 25 | 0.27% | 32.30% | LALDME 1.92<br>ISAYR                        | 1,297.65 |
| Control | 6006 | LMNB1 protein                                                                         | gi 154425605,gi 157074106 | 66,404.60 | 100.00% | 15 | 22 | 25 | 0.27% | 32.30% | LAQALH 3.32<br>EMREQH<br>DAQVK              | 2,020.00 |
| Control | 6006 | LMNB1 protein                                                                         | gi 154425605,gi 157074106 | 66,404.60 | 100.00% | 15 | 22 | 25 | 0.27% | 32.30% | LAVYID 2.18<br>KVR                          | 1,076.65 |

|         |      |                                                                                                                                                                                                          |                                                   |           |         |    |    |    |       |        |                                  |      |          |
|---------|------|----------------------------------------------------------------------------------------------------------------------------------------------------------------------------------------------------------|---------------------------------------------------|-----------|---------|----|----|----|-------|--------|----------------------------------|------|----------|
| Control | 6006 | LMNB1 protein                                                                                                                                                                                            | gi 154425605,gi 157074106                         | 66,404.60 | 100.00% | 15 | 22 | 25 | 0.27% | 32.30% | LLEGEEE RLK                      | 3.12 | 1,215.66 |
| Control | 6006 | LMNB1 protein                                                                                                                                                                                            | gi 154425605,gi 157074106                         | 66,404.60 | 100.00% | 15 | 22 | 25 | 0.27% | 32.30% | LREYEA ALNSK                     | 3.59 | 1,293.68 |
| Control | 6006 | LMNB1 protein                                                                                                                                                                                            | gi 154425605,gi 157074106                         | 66,404.60 | 100.00% | 15 | 22 | 25 | 0.27% | 32.30% | LYKEEL EQTYHA K                  | 3.65 | 1,651.83 |
| Control | 6006 | LMNB1 protein                                                                                                                                                                                            | gi 154425605,gi 157074106                         | 66,404.60 | 100.00% | 15 | 22 | 25 | 0.27% | 32.30% | MRIESLS SQLSNL QK                | 4.03 | 1,749.92 |
| Control | 6006 | LMNB1 protein                                                                                                                                                                                            | gi 154425605,gi 157074106                         | 66,404.60 | 100.00% | 15 | 22 | 25 | 0.27% | 32.30% | NMYEEE INETR                     | 3.25 | 1,443.61 |
| Control | 6006 | LMNB1 protein                                                                                                                                                                                            | gi 154425605,gi 157074106                         | 66,404.60 | 100.00% | 15 | 22 | 25 | 0.27% | 32.30% | SLESdle DLKDQI AQLEAS LAAAK      | 5.77 | 2,558.32 |
| Control | 6006 | LMNB1 protein                                                                                                                                                                                            | gi 154425605,gi 157074106                         | 66,404.60 | 100.00% | 15 | 22 | 25 | 0.27% | 32.30% | TTIPEEE EEEEEAEVAVE EELFHQ QGAPR | 3.94 | 3,425.55 |
| Control | 6006 | RecName : Full=40S ribosomal protein S27                                                                                                                                                                 | gi 108860958,gi 148231402,gi 85812223,gi 86827527 | 9,442.90  | 99.80%  | 2  | 2  | 2  | 0.02% | 31.00% | DLHHPSP EEEKRRK                  | 3.63 | 1,577.83 |
| Control | 6006 | RecName : Full=40S ribosomal protein S27                                                                                                                                                                 | gi 108860958,gi 148231402,gi 85812223,gi 86827527 | 9,442.90  | 99.80%  | 2  | 2  | 2  | 0.02% | 31.00% | LVQSPN SYFMDV K                  | 2.01 | 1,543.75 |
| Control | 6006 | PREDIC TED: similar to N-acetylgalactosaminyltransferase 7 (Protein-UDP-acetylgalactosaminyltransferase 7) (UDP-GalNAc: polypeptide N-acetylgalactosaminyltransferase 7) (Polypeptide GalNAc transferase | gi 119896052                                      | 88,098.30 | 99.80%  | 2  | 2  | 2  | 0.02% | 3.11%  | AKPLVL GPEFK                     | 2.53 | 1,198.72 |

|         |      |                                                                                                                                                                                                         |                                                                                                                   |           |        |   |   |   |       |        |                                |          |
|---------|------|---------------------------------------------------------------------------------------------------------------------------------------------------------------------------------------------------------|-------------------------------------------------------------------------------------------------------------------|-----------|--------|---|---|---|-------|--------|--------------------------------|----------|
| Control | 6006 | PREDICTED:<br>similar to<br>N-acetylglucosaminyltransferase 7 (Protein-UDP acetylglucosaminyltransferase 7) (UDP-GalNAc: polypeptide N-acetylglucosaminyltransferase 7) (Polypeptide GalNAc transferase | gi 119896052                                                                                                      | 88,098.30 | 99.80% | 2 | 2 | 2 | 0.02% | 3.11%  | SPAMAG 2.9<br>GLFAIER          | 1,335.67 |
| Control | 6006 | CALM3 protein                                                                                                                                                                                           | gi 111308539,gi 114053089,gi 115305083,gi 157831834,gi 157879669,gi 194671098,gi 28189857,gi 49037473,gi 86822265 | 19,973.60 | 99.80% | 2 | 2 | 2 | 0.02% | 18.10% | EAFSLFD 2.39<br>KGDGDT<br>ITTK | 1,844.89 |
| Control | 6006 | CALM3 protein                                                                                                                                                                                           | gi 111308539,gi 114053089,gi 115305083,gi 157831834,gi 157879669,gi 194671098,gi 28189857,gi 49037473,gi 86822265 | 19,973.60 | 99.80% | 2 | 2 | 2 | 0.02% | 18.10% | VFDKDG 2.62<br>NGYISA<br>AELR  | 1,754.87 |

|         |      |                                                                                                                                                                                                                                                                                                   |                                                                   |           |        |   |   |   |       |        |                   |      |          |
|---------|------|---------------------------------------------------------------------------------------------------------------------------------------------------------------------------------------------------------------------------------------------------------------------------------------------------|-------------------------------------------------------------------|-----------|--------|---|---|---|-------|--------|-------------------|------|----------|
| Control | 6006 | RecName<br>:<br>Full=Cyt<br>ochrome<br>c oxidase<br>polypepti<br>de 7A2,<br>mitochon<br>drial;<br>AltName:<br>Full=Cyt<br>ochrome<br>c oxidase<br>polypepti<br>de VIIa-<br>liver/hear<br>t;<br>Short=Cy<br>tochrome<br>c oxidase<br>subunit<br>VIIa-L;<br>Short=VI<br>IIC;<br>Flags:<br>Precursor | gi 117120.g<br>i 28461241,<br>gi 488158.g<br>i 74354141           | 9,305.40  | 99.80% | 2 | 2 | 3 | 0.03% | 27.70% | GGIADA<br>LLYR    | 3.36 | 1,048.58 |
| Control | 6006 | RecName<br>:<br>Full=Cyt<br>ochrome<br>c oxidase<br>polypepti<br>de 7A2,<br>mitochon<br>drial;<br>AltName:<br>Full=Cyt<br>ochrome<br>c oxidase<br>polypepti<br>de VIIa-<br>liver/hear<br>t;<br>Short=Cy<br>tochrome<br>c oxidase<br>subunit<br>VIIa-L;<br>Short=VI<br>IIC;<br>Flags:<br>Precursor | gi 117120.g<br>i 28461241,<br>gi 488158.g<br>i 74354141           | 9,305.40  | 99.80% | 2 | 2 | 3 | 0.03% | 27.70% | LFQEDN<br>GIPVHLK | 2.3  | 1,509.81 |
| Control | 6006 | RecName<br>:<br>Full=NA<br>DPH--<br>cytochro<br>me P450<br>reductase<br>;<br>Short=CP<br>R;<br>Short=P4<br>50R                                                                                                                                                                                    | gi 1102876<br>86.gi 14623<br>1834.gi 742<br>68199.gi 78<br>369374 | 77,249.90 | 99.80% | 2 | 2 | 2 | 0.02% | 2.94%  | NPFLAV<br>VTTNR   | 3.32 | 1,231.68 |

|         |      |                                                                                                                |                                                                                                                           |           |         |    |    |    |       |        |                                               |      |          |
|---------|------|----------------------------------------------------------------------------------------------------------------|---------------------------------------------------------------------------------------------------------------------------|-----------|---------|----|----|----|-------|--------|-----------------------------------------------|------|----------|
| Control | 6006 | RecName<br>:<br>Full=NA<br>DPH--<br>cytochro<br>me P450<br>reductase<br>;<br>Short=CP<br>R;<br>Short=P4<br>50R | gi 1102876<br>86,gi 14623<br>1834,gi 742<br>68199,gi 78<br>369374                                                         | 77,249.90 | 99.80%  | 2  | 2  | 2  | 0.02% | 2.94%  | YAVFAL<br>GNK                                 | 2.34 | 982.5356 |
| Control | 6006 | RecName<br>:<br>Full=Hist<br>one<br>H2A.V;<br>AltName:<br>Full=H2<br>A.F/Z                                     | gi 1099400<br>32,gi 16315<br>0,gi 278073<br>73,gi 410,gi<br> 81674301,<br>gi 8167475<br>5,gi 832884<br>07,gi 84000<br>371 | 13,535.20 | 99.80%  | 2  | 3  | 3  | 0.03% | 33.60% | ATIAGG<br>GVIPHH<br>K                         | 4.05 | 1,370.79 |
| Control | 6006 | RecName<br>:<br>Full=Hist<br>one<br>H2A.V;<br>AltName:<br>Full=H2<br>A.F/Z                                     | gi 1099400<br>32,gi 16315<br>0,gi 278073<br>73,gi 410,gi<br> 81674301,<br>gi 8167475<br>5,gi 832884<br>07,gi 84000<br>371 | 13,535.20 | 99.80%  | 2  | 3  | 3  | 0.03% | 33.60% | VGATAA<br>VYSAAIL<br>EYLTAE<br>VLELAG<br>NASK | 2.6  | 2,895.54 |
| Control | 6006 | non-<br>muscle<br>myosin<br>heavy<br>chain                                                                     | gi 3205211                                                                                                                | 72,354.70 | 100.00% | 12 | 13 | 13 | 0.14% | 25.80% | ALEEAM<br>EQKAEL<br>ER                        | 2.61 | 1,662.80 |
| Control | 6006 | non-<br>muscle<br>myosin<br>heavy<br>chain                                                                     | gi 3205211                                                                                                                | 72,354.70 | 100.00% | 12 | 13 | 13 | 0.14% | 25.80% | ANLQID<br>QLNTDL<br>NLER                      | 4.27 | 1,869.97 |
| Control | 6006 | non-<br>muscle<br>myosin<br>heavy<br>chain                                                                     | gi 3205211                                                                                                                | 72,354.70 | 100.00% | 12 | 13 | 13 | 0.14% | 25.80% | ELEDAT<br>ETADAM<br>NREVSS<br>LK              | 2.31 | 2,225.02 |
| Control | 6006 | non-<br>muscle<br>myosin<br>heavy<br>chain                                                                     | gi 3205211                                                                                                                | 72,354.70 | 100.00% | 12 | 13 | 13 | 0.14% | 25.80% | IAQLEEE<br>LEEEQG<br>NTELVN<br>DR             | 2.88 | 2,458.16 |
| Control | 6006 | non-<br>muscle<br>myosin<br>heavy<br>chain                                                                     | gi 3205211                                                                                                                | 72,354.70 | 100.00% | 12 | 13 | 13 | 0.14% | 25.80% | IAQLEEE<br>LEEEQG<br>NTELVN<br>DRLK           | 4.18 | 2,699.34 |
| Control | 6006 | non-<br>muscle<br>myosin<br>heavy<br>chain                                                                     | gi 3205211                                                                                                                | 72,354.70 | 100.00% | 12 | 13 | 13 | 0.14% | 25.80% | IAQLEEQ<br>LDNETK<br>ER                       | 4.43 | 1,815.91 |
| Control | 6006 | non-<br>muscle<br>myosin<br>heavy<br>chain                                                                     | gi 3205211                                                                                                                | 72,354.70 | 100.00% | 12 | 13 | 13 | 0.14% | 25.80% | KFDQLL<br>AEEK                                | 2.85 | 1,220.65 |
| Control | 6006 | non-<br>muscle<br>myosin<br>heavy<br>chain                                                                     | gi 3205211                                                                                                                | 72,354.70 | 100.00% | 12 | 13 | 13 | 0.14% | 25.80% | LKDVLL<br>QVDDER<br>R                         | 2.63 | 1,598.89 |

|         |      |                                                                           |                           |           |         |    |    |    |       |        |                                       |      |          |
|---------|------|---------------------------------------------------------------------------|---------------------------|-----------|---------|----|----|----|-------|--------|---------------------------------------|------|----------|
| Control | 6006 | non-muscle myosin heavy chain                                             | gi 3205211                | 72,354.70 | 100.00% | 12 | 13 | 13 | 0.14% | 25.80% | LQQELD<br>DLLVDL<br>DHQR              | 2.92 | 1,949.99 |
| Control | 6006 | non-muscle myosin heavy chain                                             | gi 3205211                | 72,354.70 | 100.00% | 12 | 13 | 13 | 0.14% | 25.80% | QAQQR<br>DELADEI<br>ANSSGK            | 4.72 | 2,088.98 |
| Control | 6006 | non-muscle myosin heavy chain                                             | gi 3205211                | 72,354.70 | 100.00% | 12 | 13 | 13 | 0.14% | 25.80% | QISTLHA<br>QVTDMR                     | 2.8  | 1,515.76 |
| Control | 6006 | non-muscle myosin heavy chain                                             | gi 3205211                | 72,354.70 | 100.00% | 12 | 13 | 13 | 0.14% | 25.80% | TRLQQE<br>LDDLLV<br>DLDHQR            | 5.49 | 2,207.14 |
| Control | 6006 | PREDICTED: similar to keratin 2 (epidermal ichthyosis bullosa of Siemens) | gi 119892108              | 64,293.10 | 99.80%  | 2  | 2  | 3  | 0.03% | 3.89%  | FLEQQN<br>QVLQTK                      | 4.04 | 1,475.79 |
| Control | 6006 | PREDICTED: similar to keratin 2 (epidermal ichthyosis bullosa of Siemens) | gi 119892108              | 64,293.10 | 99.80%  | 2  | 2  | 3  | 0.03% | 3.89%  | TAAENE<br>FVTLKK                      | 3.75 | 1,350.73 |
| Control | 6006 | RPN1 protein                                                              | gi 126717391.gi 129277520 | 68,335.00 | 100.00% | 15 | 17 | 25 | 0.27% | 35.80% | AASFLL<br>ALEPELE<br>AR               | 4.56 | 1,629.88 |
| Control | 6006 | RPN1 protein                                                              | gi 126717391.gi 129277520 | 68,335.00 | 100.00% | 15 | 17 | 25 | 0.27% | 35.80% | DTYIENE<br>KLISGK                     | 3.43 | 1,509.78 |
| Control | 6006 | RPN1 protein                                                              | gi 126717391.gi 129277520 | 68,335.00 | 100.00% | 15 | 17 | 25 | 0.27% | 35.80% | FFTVKLP<br>VALDPG<br>AK               | 3.85 | 1,602.93 |
| Control | 6006 | RPN1 protein                                                              | gi 126717391.gi 129277520 | 68,335.00 | 100.00% | 15 | 17 | 25 | 0.27% | 35.80% | HFDETV<br>NRYK                        | 3.18 | 1,308.63 |
| Control | 6006 | RPN1 protein                                                              | gi 126717391.gi 129277520 | 68,335.00 | 100.00% | 15 | 17 | 25 | 0.27% | 35.80% | IDHILDA<br>L                          | 2.37 | 909.5042 |
| Control | 6006 | RPN1 protein                                                              | gi 126717391.gi 129277520 | 68,335.00 | 100.00% | 15 | 17 | 25 | 0.27% | 35.80% | ISVIVEA<br>VYTHVL<br>QPYPTQI<br>TQSEK | 2.58 | 2,843.52 |
| Control | 6006 | RPN1 protein                                                              | gi 126717391.gi 129277520 | 68,335.00 | 100.00% | 15 | 17 | 25 | 0.27% | 35.80% | LPVALD<br>PGAK                        | 1.88 | 980.5777 |
| Control | 6006 | RPN1 protein                                                              | gi 126717391.gi 129277520 | 68,335.00 | 100.00% | 15 | 17 | 25 | 0.27% | 35.80% | LVDHVF<br>DEQVIDS<br>LTVK             | 3.11 | 1,957.03 |
| Control | 6006 | RPN1 protein                                                              | gi 126717391.gi 129277520 | 68,335.00 | 100.00% | 15 | 17 | 25 | 0.27% | 35.80% | NIQVDSP<br>YEISR                      | 3.61 | 1,420.71 |

|         |      |                                                                                                 |                                                                   |            |         |    |    |    |       |        |                                           |      |          |
|---------|------|-------------------------------------------------------------------------------------------------|-------------------------------------------------------------------|------------|---------|----|----|----|-------|--------|-------------------------------------------|------|----------|
| Control | 6006 | RPN1<br>protein                                                                                 | gi 1267173<br>91.gi 12927<br>7520                                 | 68,335.00  | 100.00% | 15 | 17 | 25 | 0.27% | 35.80% | QFVVFE<br>GNHYFY<br>SPYPTK                | 2.86 | 2,223.05 |
| Control | 6006 | RPN1<br>protein                                                                                 | gi 1267173<br>91.gi 12927<br>7520                                 | 68,335.00  | 100.00% | 15 | 17 | 25 | 0.27% | 35.80% | SEDLLD<br>YGPFR                           | 2.9  | 1,311.62 |
| Control | 6006 | RPN1<br>protein                                                                                 | gi 1267173<br>91.gi 12927<br>7520                                 | 68,335.00  | 100.00% | 15 | 17 | 25 | 0.27% | 35.80% | THYIVG<br>YNLPSY<br>EYLYNL<br>GDQYAL<br>K | 2.7  | 2,997.47 |
| Control | 6006 | RPN1<br>protein                                                                                 | gi 1267173<br>91.gi 12927<br>7520                                 | 68,335.00  | 100.00% | 15 | 17 | 25 | 0.27% | 35.80% | VHSENN<br>SPFLTIT<br>SMTR                 | 3.39 | 1,949.94 |
| Control | 6006 | RPN1<br>protein                                                                                 | gi 1267173<br>91.gi 12927<br>7520                                 | 68,335.00  | 100.00% | 15 | 17 | 25 | 0.27% | 35.80% | VTAEVV<br>LAHAGS<br>GSSPR                 | 5.68 | 1,637.86 |
| Control | 6006 | RPN1<br>protein                                                                                 | gi 1267173<br>91.gi 12927<br>7520                                 | 68,335.00  | 100.00% | 15 | 17 | 25 | 0.27% | 35.80% | YDYQRQ<br>PDSGVS<br>SVR                   | 4.95 | 1,756.82 |
| Control | 6006 | RecName<br>:<br>Full=60S<br>ribosomal<br>protein<br>L8                                          | gi 1088609<br>41.gi 15442<br>6156.gi 742<br>67654.gi 77<br>736197 | 28,006.80  | 99.80%  | 2  | 2  | 2  | 0.02% | 6.61%  | ASGNYA<br>TVISHNP<br>ETK                  | 2.43 | 1,688.82 |
| Control | 6006 | RecName<br>:<br>Full=60S<br>ribosomal<br>protein<br>L8                                          | gi 1088609<br>41.gi 15442<br>6156.gi 742<br>67654.gi 77<br>736197 | 28,006.80  | 99.80%  | 2  | 2  | 2  | 0.02% | 6.61%  | ASGNYA<br>TVISHNP<br>ETKK                 | 2.51 | 1,816.92 |
| Control | 6006 | Family<br>with<br>sequence<br>similarity<br>62 (C2<br>domain<br>containin<br>g),<br>member<br>A | gi 1173061<br>90.gi 11815<br>0984                                 | 123,012.90 | 100.00% | 4  | 4  | 4  | 0.04% | 5.15%  | LHVLEA<br>QDLIAK                          | 3.51 | 1,349.78 |
| Control | 6006 | Family<br>with<br>sequence<br>similarity<br>62 (C2<br>domain<br>containin<br>g),<br>member<br>A | gi 1173061<br>90.gi 11815<br>0984                                 | 123,012.90 | 100.00% | 4  | 4  | 4  | 0.04% | 5.15%  | LLVPLVP<br>DLQDVA<br>QLR                  | 3.83 | 1,789.06 |
| Control | 6006 | Family<br>with<br>sequence<br>similarity<br>62 (C2<br>domain<br>containin<br>g),<br>member<br>A | gi 1173061<br>90.gi 11815<br>0984                                 | 123,012.90 | 100.00% | 4  | 4  | 4  | 0.04% | 5.15%  | LLYLDT<br>SEVR                            | 2.53 | 1,208.65 |



|         |      |                                                                     |                                              |            |         |   |   |   |       |       |                                  |          |
|---------|------|---------------------------------------------------------------------|----------------------------------------------|------------|---------|---|---|---|-------|-------|----------------------------------|----------|
| Control | 6006 | Family with sequence similarity 62 (C2 domain containing), member A | gi 117306190,gi 118150984                    | 123,012.90 | 100.00% | 4 | 4 | 4 | 0.04% | 5.15% | LTHSDSP 2.96<br>PEAPAG<br>PLGQVK | 1,900.98 |
| Control | 6006 | CD9 molecule                                                        | gi 151556398,gi 162821,gi 27806911,gi 399217 | 25,240.80  | 99.80%  | 2 | 3 | 5 | 0.05% | 6.19% | EVQKFY 2.9<br>EDTYNK<br>LK       | 1,804.91 |
| Control | 6006 | CD9 molecule                                                        | gi 151556398,gi 162821,gi 27806911,gi 399217 | 25,240.80  | 99.80%  | 2 | 3 | 5 | 0.05% | 6.19% | FYEDTY 2.96<br>NKLK              | 1,320.65 |
| Control | 6006 | GANAB protein                                                       | gi 151553519,gi 194679898                    | 109,455.80 | 99.90%  | 2 | 2 | 2 | 0.02% | 3.31% | LSFQHD 3.15<br>PETSVLI<br>LR     | 1,754.94 |
| Control | 6006 | GANAB protein                                                       | gi 151553519,gi 194679898                    | 109,455.80 | 99.90%  | 2 | 2 | 2 | 0.02% | 3.31% | VVIIGAG 3.52<br>KPATVV<br>LQTK   | 1,694.06 |
| Control | 6006 | Myosin ID                                                           | gi 109659303,gi 115497786,gi 122145769       | 115,924.40 | 100.00% | 3 | 4 | 4 | 0.04% | 4.37% | DVIDKQ 5.01<br>HTEQEA<br>SYGR    | 1,875.88 |
| Control | 6006 | Myosin ID                                                           | gi 109659303,gi 115497786,gi 122145769       | 115,924.40 | 100.00% | 3 | 4 | 4 | 0.04% | 4.37% | LNQPQP 2.61<br>DFTK              | 1,187.61 |
| Control | 6006 | Myosin ID                                                           | gi 109659303,gi 115497786,gi 122145769       | 115,924.40 | 100.00% | 3 | 4 | 4 | 0.04% | 4.37% | SFHSFYQ 3.2<br>LLQGGG<br>DQMLR   | 2,130.01 |
| Control | 6006 | Chromosome 20 open reading frame 3 ortholog                         | gi 74268319,gi 78369434                      | 46,074.40  | 99.80%  | 2 | 2 | 2 | 0.02% | 7.28% | GGADV 2.88<br>VENLPG<br>FPDNIR   | 1,916.95 |
| Control | 6006 | Chromosome 20 open reading frame 3 ortholog                         | gi 74268319,gi 78369434                      | 46,074.40  | 99.80%  | 2 | 2 | 2 | 0.02% | 7.28% | LLSSET 3.47<br>PIEGR             | 1,314.73 |

|         |      |                                                                                                                                                                                                                        |            |            |         |   |   |   |       |       |                      |          |
|---------|------|------------------------------------------------------------------------------------------------------------------------------------------------------------------------------------------------------------------------|------------|------------|---------|---|---|---|-------|-------|----------------------|----------|
| Control | 6006 | PREDIC TED: 06<br>similar to<br>Alpha-mannosidase 2<br>(Alpha-mannosidase II)<br>(Mannosyl-oligosaccharide<br>1,3-1,6-alpha-mannosidase)<br>(MAN II)<br>(Golgi alpha-mannosidase II)<br>(Mannosidase<br>alpha class 2A | gi 1198960 | 130,855.40 | 100.00% | 3 | 3 | 3 | 0.03% | 2.88% | AEMLLD 2.37<br>QYR   | 1,154.55 |
| Control | 6006 | PREDIC TED: 06<br>similar to<br>Alpha-mannosidase 2<br>(Alpha-mannosidase II)<br>(Mannosyl-oligosaccharide<br>1,3-1,6-alpha-mannosidase)<br>(MAN II)<br>(Golgi alpha-mannosidase II)<br>(Mannosidase<br>alpha class 2A | gi 1198960 | 130,855.40 | 100.00% | 3 | 3 | 3 | 0.03% | 2.88% | TQYIFNN 2.94<br>MVVK | 1,372.69 |

|         |      |                                                                                                                                                                                                                  |                       |            |         |   |   |   |       |        |                       |     |          |
|---------|------|------------------------------------------------------------------------------------------------------------------------------------------------------------------------------------------------------------------|-----------------------|------------|---------|---|---|---|-------|--------|-----------------------|-----|----------|
| Control | 6006 | PREDIC TED: 06<br>similar to<br>Alpha-mannosidase 2<br>(Alpha-mannosidase II)<br>(Mannosyl-oligosaccharide 1,3-1,6-alpha-mannosidase)<br>(MAN II)<br>(Golgi alpha-mannosidase II)<br>(Mannosidase alpha class 2A | gi 1198960            | 130,855.40 | 100.00% | 3 | 3 | 3 | 0.03% | 2.88%  | TTVVLA<br>PLGDDF<br>R | 2.5 | 1,403.75 |
| Control | 6006 | RecName : Full=Cytochrome c oxidase subunit 4 isoform 1, mitochondrial; AltName: Full=Cytochrome c oxidase subunit IV isoform 1; Short=Cytochrome c oxidase polypeptide IV;                                      | gi 117085.gi 14924153 | 19,554.00  | 100.00% | 4 | 4 | 6 | 0.07% | 21.30% | DYPLPD<br>VAHVK       | 3.1 | 1,253.65 |



|         |      |                                                                                                                                                                                                                                                                                                                                                                              |            |         |    |    |    |       |        |                                           |          |
|---------|------|------------------------------------------------------------------------------------------------------------------------------------------------------------------------------------------------------------------------------------------------------------------------------------------------------------------------------------------------------------------------------|------------|---------|----|----|----|-------|--------|-------------------------------------------|----------|
| Control | 6006 | RecName<br>: gi 117085.g<br>Full=Cyt<br>ochrome<br>c oxidase<br>subunit 4<br>isoform<br>1, gi 14924153<br>149241599,<br>gi 1492416<br>mitochon<br>drial; 862,gi 47824<br>5063<br>AltName:<br>89,gi 59858<br>Full=Cyt<br>ochrome<br>c oxidase<br>subunit<br>IV<br>isoform<br>1;<br>Short=C<br>OX IV-1;<br>AltName:<br>Full=Cyt<br>ochrome<br>c oxidase<br>polypepti<br>de IV; | 19,554.00  | 100.00% | 4  | 4  | 6  | 0.07% | 21.30% | SEDYAL 2<br>PSYVDR<br>R                   | 1,570.75 |
| Control | 6006 | Canx<br>protein<br>gi 1572791<br>43,gi 15778<br>5567                                                                                                                                                                                                                                                                                                                         | 67,759.10  | 100.00% | 5  | 6  | 7  | 0.08% | 11.80% | APVPTG 1.99<br>EVYFAD<br>SFDR             | 1,770.83 |
| Control | 6006 | Canx<br>protein<br>gi 1572791<br>43,gi 15778<br>5567                                                                                                                                                                                                                                                                                                                         | 67,759.10  | 100.00% | 5  | 6  | 7  | 0.08% | 11.80% | KIPNPDF 4.98<br>FEDLEPF<br>K              | 1,835.92 |
| Control | 6006 | Canx<br>protein<br>gi 1572791<br>43,gi 15778<br>5567                                                                                                                                                                                                                                                                                                                         | 67,759.10  | 100.00% | 5  | 6  | 7  | 0.08% | 11.80% | LPQDKG 2.16<br>LVLMSR                     | 1,301.72 |
| Control | 6006 | Canx<br>protein<br>gi 1572791<br>43,gi 15778<br>5567                                                                                                                                                                                                                                                                                                                         | 67,759.10  | 100.00% | 5  | 6  | 7  | 0.08% | 11.80% | TPELNL 3.35<br>DQFHDK<br>TPYTIMF<br>GPKD  | 2,723.30 |
| Control | 6006 | Canx<br>protein<br>gi 1572791<br>43,gi 15778<br>5567                                                                                                                                                                                                                                                                                                                         | 67,759.10  | 100.00% | 5  | 6  | 7  | 0.08% | 11.80% | VTYKAP 4.73<br>VPTGEV<br>YFADSF<br>DR     | 2,262.11 |
| Control | 6006 | nicalin<br>gi 1154949<br>44,gi 94534<br>903                                                                                                                                                                                                                                                                                                                                  | 63,091.10  | 99.80%  | 2  | 4  | 4  | 0.04% | 6.23%  | AAQLVD 5.84<br>KDGTF<br>STLEHY<br>LSR     | 2,364.22 |
| Control | 6006 | nicalin<br>gi 1154949<br>44,gi 94534<br>903                                                                                                                                                                                                                                                                                                                                  | 63,091.10  | 99.80%  | 2  | 4  | 4  | 0.04% | 6.23%  | MQQYDL 2.85<br>QGQPYG<br>TR               | 1,700.77 |
| Control | 6006 | embryo-<br>specific<br>fibronecti<br>n 1<br>transcript<br>variant<br>gi 2200286<br>57,gi 76610<br>126                                                                                                                                                                                                                                                                        | 262,401.30 | 100.00% | 21 | 28 | 30 | 0.33% | 16.10% | GATYNII 2.96<br>VEAVK                     | 1,277.71 |
| Control | 6006 | embryo-<br>specific<br>fibronecti<br>n 1<br>transcript<br>variant<br>gi 2200286<br>57,gi 76610<br>126                                                                                                                                                                                                                                                                        | 262,401.30 | 100.00% | 21 | 28 | 30 | 0.33% | 16.10% | GDSPAS 3.49<br>SKPVSIN<br>YR              | 1,577.79 |
| Control | 6006 | embryo-<br>specific<br>fibronecti<br>n 1<br>transcript<br>variant<br>gi 2200286<br>57,gi 76610<br>126                                                                                                                                                                                                                                                                        | 262,401.30 | 100.00% | 21 | 28 | 30 | 0.33% | 16.10% | GFNCES 3.25<br>KPEPEET<br>CFDKYT<br>GNTYR | 2,815.20 |

|         |      |                                                  |                          |            |         |    |    |    |       |        |                                     |      |          |
|---------|------|--------------------------------------------------|--------------------------|------------|---------|----|----|----|-------|--------|-------------------------------------|------|----------|
| Control | 6006 | embryo-specific fibronectin 1 transcript variant | gi 220028657,gi 76610126 | 262,401.30 | 100.00% | 21 | 28 | 30 | 0.33% | 16.10% | GLAFTD VDVDSIK                      | 3.7  | 1,379.71 |
| Control | 6006 | embryo-specific fibronectin 1 transcript variant | gi 220028657,gi 76610126 | 262,401.30 | 100.00% | 21 | 28 | 30 | 0.33% | 16.10% | GLRPGV VYEGQL ISVQHY GQR            | 6.28 | 2,356.25 |
| Control | 6006 | embryo-specific fibronectin 1 transcript variant | gi 220028657,gi 76610126 | 262,401.30 | 100.00% | 21 | 28 | 30 | 0.33% | 16.10% | IHLYTLN DNAR                        | 3.33 | 1,329.69 |
| Control | 6006 | embryo-specific fibronectin 1 transcript variant | gi 220028657,gi 76610126 | 262,401.30 | 100.00% | 21 | 28 | 30 | 0.33% | 16.10% | KKTDEL PQLVTLP HPNLHG PEILDVP STVQK | 5.15 | 3,443.89 |
| Control | 6006 | embryo-specific fibronectin 1 transcript variant | gi 220028657,gi 76610126 | 262,401.30 | 100.00% | 21 | 28 | 30 | 0.33% | 16.10% | NLQPGS EYAVSL VAVK                  | 4.19 | 1,674.91 |
| Control | 6006 | embryo-specific fibronectin 1 transcript variant | gi 220028657,gi 76610126 | 262,401.30 | 100.00% | 21 | 28 | 30 | 0.33% | 16.10% | NTFAEV TGLSPG VTYHFK                | 3.64 | 1,967.99 |
| Control | 6006 | embryo-specific fibronectin 1 transcript variant | gi 220028657,gi 76610126 | 262,401.30 | 100.00% | 21 | 28 | 30 | 0.33% | 16.10% | QYNVGP AASQYP LR                    | 3.63 | 1,563.79 |
| Control | 6006 | embryo-specific fibronectin 1 transcript variant | gi 220028657,gi 76610126 | 262,401.30 | 100.00% | 21 | 28 | 30 | 0.33% | 16.10% | RPGAEP GNEGST AHSYNQ YSQR           | 4.16 | 2,406.08 |
| Control | 6006 | embryo-specific fibronectin 1 transcript variant | gi 220028657,gi 76610126 | 262,401.30 | 100.00% | 21 | 28 | 30 | 0.33% | 16.10% | SDKVPP PRDLQF VEVTDV K              | 2.64 | 2,169.16 |
| Control | 6006 | embryo-specific fibronectin 1 transcript variant | gi 220028657,gi 76610126 | 262,401.30 | 100.00% | 21 | 28 | 30 | 0.33% | 16.10% | SSPVVID ASTAIDA PSNLR               | 3.89 | 1,913.00 |
| Control | 6006 | embryo-specific fibronectin 1 transcript variant | gi 220028657,gi 76610126 | 262,401.30 | 100.00% | 21 | 28 | 30 | 0.33% | 16.10% | STATISG LKPGVD YTITVY AVTGR         | 3.41 | 2,470.32 |

|         |      |                                                  |                                       |            |         |    |    |    |       |        |                                                |      |          |
|---------|------|--------------------------------------------------|---------------------------------------|------------|---------|----|----|----|-------|--------|------------------------------------------------|------|----------|
| Control | 6006 | embryo-specific fibronectin 1 transcript variant | gi 220028657,gi 76610126              | 262,401.30 | 100.00% | 21 | 28 | 30 | 0.33% | 16.10% | STTPDIT GYR                                    | 2.25 | 1,110.54 |
| Control | 6006 | embryo-specific fibronectin 1 transcript variant | gi 220028657,gi 76610126              | 262,401.30 | 100.00% | 21 | 28 | 30 | 0.33% | 16.10% | SYTITGL QPGTDY K                               | 3.57 | 1,543.76 |
| Control | 6006 | embryo-specific fibronectin 1 transcript variant | gi 220028657,gi 76610126              | 262,401.30 | 100.00% | 21 | 28 | 30 | 0.33% | 16.10% | SYTITGL QPGTDY KIHLYTL NDNAR                   | 4.56 | 2,854.44 |
| Control | 6006 | embryo-specific fibronectin 1 transcript variant | gi 220028657,gi 76610126              | 262,401.30 | 100.00% | 21 | 28 | 30 | 0.33% | 16.10% | TEIDKPS QMQVT DVQDNS ISVR                      | 5.63 | 2,506.21 |
| Control | 6006 | embryo-specific fibronectin 1 transcript variant | gi 220028657,gi 76610126              | 262,401.30 | 100.00% | 21 | 28 | 30 | 0.33% | 16.10% | TKTETIT GFQVDA IPANGQT PIQR                    | 2.8  | 2,586.35 |
| Control | 6006 | embryo-specific fibronectin 1 transcript variant | gi 220028657,gi 76610126              | 262,401.30 | 100.00% | 21 | 28 | 30 | 0.33% | 16.10% | TPFITNP GYDTGN GIQLPGT SGQQPS LGQQMI FEEHGF RR | 3.03 | 4,392.11 |
| Control | 6006 | embryo-specific fibronectin 1 transcript variant | gi 220028657,gi 76610126              | 262,401.30 | 100.00% | 21 | 28 | 30 | 0.33% | 16.10% | VPGTSA SATLTG LTR                              | 4.35 | 1,431.78 |
| Control | 6006 | translocation of outer mitochondrial membrane 40 | gi 115495635,gi 122134275,gi 94534905 | 37,707.00  | 100.00% | 5  | 7  | 8  | 0.09% | 23.00% | KLPLPL TLALGA FLNHR                            | 3.25 | 1,971.19 |
| Control | 6006 | translocation of outer mitochondrial membrane 40 | gi 115495635,gi 122134275,gi 94534905 | 37,707.00  | 100.00% | 5  | 7  | 8  | 0.09% | 23.00% | KLPLPL TLALGA FLNHRK                           | 3.23 | 2,099.29 |
| Control | 6006 | translocation of outer mitochondrial membrane 40 | gi 115495635,gi 122134275,gi 94534905 | 37,707.00  | 100.00% | 5  | 7  | 8  | 0.09% | 23.00% | MQDTSV SFGYQL DLPK                             | 2.52 | 1,844.87 |

|         |      |                                                                   |                                       |            |         |   |   |   |       |        |                                                            |          |
|---------|------|-------------------------------------------------------------------|---------------------------------------|------------|---------|---|---|---|-------|--------|------------------------------------------------------------|----------|
| Control | 6006 | translocase of outer mitochondrial membrane 40                    | gi 115495635,gi 122134275,gi 94534905 | 37,707.00  | 100.00% | 5 | 7 | 8 | 0.09% | 23.00% | QLSPTEA 3.8<br>FPVLVG<br>DMDNSG<br>SLNAQVI<br>HQLGPG<br>LR | 3,576.81 |
| Control | 6006 | translocase of outer mitochondrial membrane 40                    | gi 115495635,gi 122134275,gi 94534905 | 37,707.00  | 100.00% | 5 | 7 | 8 | 0.09% | 23.00% | RPGEEG 3.68<br>AVMSLA<br>GK                                | 1,417.71 |
| Control | 6006 | PREDICTED: ATPase, Ca++ transporting, plasma membrane 4 isoform 5 | gi 119908026                          | 133,777.70 | 100.00% | 7 | 8 | 8 | 0.09% | 7.62%  | AFHSSL 2.95<br>HESIQPK<br>K                                | 1,608.85 |
| Control | 6006 | PREDICTED: ATPase, Ca++ transporting, plasma membrane 4 isoform 5 | gi 119908026                          | 133,777.70 | 100.00% | 7 | 8 | 8 | 0.09% | 7.62%  | KADVGF 3.83<br>AMGIAG<br>TDVAK                             | 1,666.85 |
| Control | 6006 | PREDICTED: ATPase, Ca++ transporting, plasma membrane 4 isoform 5 | gi 119908026                          | 133,777.70 | 100.00% | 7 | 8 | 8 | 0.09% | 7.62%  | LKTNPV 4.72<br>EGLSGN<br>PADLEK                            | 1,881.99 |
| Control | 6006 | PREDICTED: ATPase, Ca++ transporting, plasma membrane 4 isoform 5 | gi 119908026                          | 133,777.70 | 100.00% | 7 | 8 | 8 | 0.09% | 7.62%  | QVVAVT 3.97<br>GDGTND<br>GPALK                             | 1,641.84 |
| Control | 6006 | PREDICTED: ATPase, Ca++ transporting, plasma membrane 4 isoform 5 | gi 119908026                          | 133,777.70 | 100.00% | 7 | 8 | 8 | 0.09% | 7.62%  | QVVAVT 2.95<br>GDGTND<br>GPALKK                            | 1,769.94 |



|         |      |                                                                      |                                                                                                 |            |         |   |   |    |       |        |                                             |          |
|---------|------|----------------------------------------------------------------------|-------------------------------------------------------------------------------------------------|------------|---------|---|---|----|-------|--------|---------------------------------------------|----------|
| Control | 6006 | PREDIC TED: ATPase, Ca++ transportin g, plasma membran e 4 isoform 5 | gi 1199080 26                                                                                   | 133,777.70 | 100.00% | 7 | 8 | 8  | 0.09% | 7.62%  | TQDQVA 3.41<br>LEIQPLN<br>SQEGIDS<br>EEKEK  | 2,757.34 |
| Control | 6006 | PREDIC TED: ATPase, Ca++ transportin g, plasma membran e 4 isoform 5 | gi 1199080 26                                                                                   | 133,777.70 | 100.00% | 7 | 8 | 8  | 0.09% | 7.62%  | TQDQVA 4.42<br>LEIQPLN<br>SQEGIDS<br>EEKEKK | 2,885.44 |
| Control | 6006 | PREDIC TED: similar to histone cluster 1, H2aj                       | gi 1199155 59,gi 11991 5725,gi 119 939855,gi 1 98282091,g i 76619954, gi 7663126 9,gi 766335 42 | 14,074.00  | 100.00% | 4 | 6 | 11 | 0.12% | 35.40% | AGLQFP 3.1<br>VGR                           | 944.5313 |
| Control | 6006 | PREDIC TED: similar to histone cluster 1, H2aj                       | gi 1199155 59,gi 11991 5725,gi 119 939855,gi 1 98282091,g i 76619954, gi 7663126 9,gi 766335 42 | 14,074.00  | 100.00% | 4 | 6 | 11 | 0.12% | 35.40% | HLQLAIR 2.94<br>NDEELN<br>KLLGK             | 2,104.19 |
| Control | 6006 | PREDIC TED: similar to histone cluster 1, H2aj                       | gi 1199155 59,gi 11991 5725,gi 119 939855,gi 1 98282091,g i 76619954, gi 7663126 9,gi 766335 42 | 14,074.00  | 100.00% | 4 | 6 | 11 | 0.12% | 35.40% | NDEELN 3.15<br>KLLGK                        | 1,272.68 |
| Control | 6006 | PREDIC TED: similar to histone cluster 1, H2aj                       | gi 1199155 59,gi 11991 5725,gi 119 939855,gi 1 98282091,g i 76619954, gi 7663126 9,gi 766335 42 | 14,074.00  | 100.00% | 4 | 6 | 11 | 0.12% | 35.40% | VTIAQG 4.93<br>GVLPNIQ<br>AVLLPK            | 1,931.17 |
| Control | 6006 | phosphatidic acid phosphate type 2A                                  | gi 1226924 11,gi 81674 095                                                                      | 32,253.70  | 99.80%  | 2 | 4 | 4  | 0.04% | 10.20% | KEEDSH 3.88<br>TTLHETP<br>TTGNHY<br>R       | 2,353.08 |
| Control | 6006 | phosphatidic acid phosphate type 2A                                  | gi 1226924 11,gi 81674 095                                                                      | 32,253.70  | 99.80%  | 2 | 4 | 4  | 0.04% | 10.20% | NNYIATI 2.47<br>YK                          | 1,099.58 |
| Control | 6006 | Plexin domain containin g 2                                          | gi 1173066 39,gi 11815 0958                                                                     | 59,450.20  | 100.00% | 3 | 3 | 3  | 0.03% | 9.42%  | IIFGYKEI 2.81<br>PVLVTQI<br>SSTNHP<br>VK    | 2,583.45 |

|         |      |                                                                                                                                                                                                                            |                                                       |           |         |    |    |    |       |        |                                                     |          |
|---------|------|----------------------------------------------------------------------------------------------------------------------------------------------------------------------------------------------------------------------------|-------------------------------------------------------|-----------|---------|----|----|----|-------|--------|-----------------------------------------------------|----------|
| Control | 6006 | Plexin domain containin g 2                                                                                                                                                                                                | gi 1173066_39,gi 11815_0958                           | 59,450.20 | 100.00% | 3  | 3  | 3  | 0.03% | 9.42%  | VGLSDA 4.43<br>FVVVHR                               | 1,298.72 |
| Control | 6006 | Plexin domain containin g 2                                                                                                                                                                                                | gi 1173066_39,gi 11815_0958                           | 59,450.20 | 100.00% | 3  | 3  | 3  | 0.03% | 9.42%  | VNLSFD 2.3<br>FPFYGHF<br>LR                         | 1,858.93 |
| Control | 6006 | RecName : Full=Doli chyl-diphosph ooligosac charide-- protein glycosyltr ansferase subunit 2; AltName: Full=Doli chyl-diphosph ooligosac charide-- protein glycosyltr ansferase 63 kDa subunit; AltName: Full=Rib ophorin- | gi 1221402_31,gi 14623_1756,gi 742_67729,gi 77_736155 | 69,197.20 | 100.00% | 12 | 16 | 21 | 0.23% | 29.20% | ASLDRPF 4.2<br>TSLESFA<br>YSIVGLS<br>SLGAQV<br>PDVK | 3,254.69 |
| Control | 6006 | RecName : Full=Doli chyl-diphosph ooligosac charide-- protein glycosyltr ansferase subunit 2; AltName: Full=Doli chyl-diphosph ooligosac charide-- protein glycosyltr ansferase 63 kDa subunit; AltName: Full=Rib ophorin- | gi 1221402_31,gi 14623_1756,gi 742_67729,gi 77_736155 | 69,197.20 | 100.00% | 12 | 16 | 21 | 0.23% | 29.20% | FSSGYY 2.74<br>DFSVK                                | 1,299.59 |

|         |      |                                                                                                                                                                                                                                                                                                                    |           |         |    |    |    |       |        |                                                 |          |
|---------|------|--------------------------------------------------------------------------------------------------------------------------------------------------------------------------------------------------------------------------------------------------------------------------------------------------------------------|-----------|---------|----|----|----|-------|--------|-------------------------------------------------|----------|
| Control | 6006 | RecName gi 1221402<br>:<br>Full=Doli<br>chyl-<br>diphosph<br>ooligosac<br>charide--<br>protein<br>glycosyltr<br>ansferase<br>subunit<br>2;<br>AltName:<br>Full=Doli<br>chyl-<br>diphosph<br>ooligosac<br>charide--<br>protein<br>glycosyltr<br>ansferase<br>63 kDa<br>subunit;<br>AltName:<br>Full=Rib<br>ophorin- | 69,197.20 | 100.00% | 12 | 16 | 21 | 0.23% | 29.20% | ISTEVGI 2.81<br>TNVDLS<br>TVDKDQ<br>SIAPK       | 2,530.33 |
| Control | 6006 | RecName gi 1221402<br>:<br>Full=Doli<br>chyl-<br>diphosph<br>ooligosac<br>charide--<br>protein<br>glycosyltr<br>ansferase<br>subunit<br>2;<br>AltName:<br>Full=Doli<br>chyl-<br>diphosph<br>ooligosac<br>charide--<br>protein<br>glycosyltr<br>ansferase<br>63 kDa<br>subunit;<br>AltName:<br>Full=Rib<br>ophorin- | 69,197.20 | 100.00% | 12 | 16 | 21 | 0.23% | 29.20% | LMDHVG 4.05<br>TEPSIKE<br>DQVIQL<br>MNAIFS<br>K | 2,959.49 |



|         |      |                                                                                                                                                                                                                                                                                                                    |           |         |    |    |    |       |        |                                             |      |          |
|---------|------|--------------------------------------------------------------------------------------------------------------------------------------------------------------------------------------------------------------------------------------------------------------------------------------------------------------------|-----------|---------|----|----|----|-------|--------|---------------------------------------------|------|----------|
| Control | 6006 | RecName gi 1221402<br>:<br>Full=Doli<br>chyl-<br>diphosph<br>ooligosac<br>charide--<br>protein<br>glycosyltr<br>ansferase<br>subunit<br>2;<br>AltName:<br>Full=Doli<br>chyl-<br>diphosph<br>ooligosac<br>charide--<br>protein<br>glycosyltr<br>ansferase<br>63 kDa<br>subunit;<br>AltName:<br>Full=Rib<br>ophorin- | 69,197.20 | 100.00% | 12 | 16 | 21 | 0.23% | 29.20% | LSKEET<br>VLATVQ<br>ALQTAS<br>YLSQQA<br>DLR | 4.93 | 2,963.57 |
| Control | 6006 | RecName gi 1221402<br>:<br>Full=Doli<br>chyl-<br>diphosph<br>ooligosac<br>charide--<br>protein<br>glycosyltr<br>ansferase<br>subunit<br>2;<br>AltName:<br>Full=Doli<br>chyl-<br>diphosph<br>ooligosac<br>charide--<br>protein<br>glycosyltr<br>ansferase<br>63 kDa<br>subunit;<br>AltName:<br>Full=Rib<br>ophorin- | 69,197.20 | 100.00% | 12 | 16 | 21 | 0.23% | 29.20% | SIVEEIE<br>DLVAR                            | 3.72 | 1,372.73 |



|         |      |                                                                                                                                                                                                                                                                                                                 |           |         |    |    |    |       |        |                                        |      |          |
|---------|------|-----------------------------------------------------------------------------------------------------------------------------------------------------------------------------------------------------------------------------------------------------------------------------------------------------------------|-----------|---------|----|----|----|-------|--------|----------------------------------------|------|----------|
| Control | 6006 | RecName gi 1221402 :<br>Full=Doli<br>chyl-<br>diphosph<br>ooligosac<br>charide--<br>protein<br>glycosyltr<br>ansferase<br>subunit<br>2;<br>AltName:<br>Full=Doli<br>chyl-<br>diphosph<br>ooligosac<br>charide--<br>protein<br>glycosyltr<br>ansferase<br>63 kDa<br>subunit;<br>AltName:<br>Full=Rib<br>ophorin- | 69,197.20 | 100.00% | 12 | 16 | 21 | 0.23% | 29.20% | VKISTEV<br>GITNVD<br>LSTVDK<br>DQSIAPK | 3.31 | 2,757.49 |
| Control | 6006 | RecName gi 1221402 :<br>Full=Doli<br>chyl-<br>diphosph<br>ooligosac<br>charide--<br>protein<br>glycosyltr<br>ansferase<br>subunit<br>2;<br>AltName:<br>Full=Doli<br>chyl-<br>diphosph<br>ooligosac<br>charide--<br>protein<br>glycosyltr<br>ansferase<br>63 kDa<br>subunit;<br>AltName:<br>Full=Rib<br>ophorin- | 69,197.20 | 100.00% | 12 | 16 | 21 | 0.23% | 29.20% | YIANTV<br>ELR                          | 2.85 | 1,078.59 |

|         |      |                                                                                                                                                                                                                                           |                  |           |        |   |   |   |       |       |                              |          |
|---------|------|-------------------------------------------------------------------------------------------------------------------------------------------------------------------------------------------------------------------------------------------|------------------|-----------|--------|---|---|---|-------|-------|------------------------------|----------|
| Control | 6006 | PREDIC<br>TED:<br>similar to<br>Calcium-<br>binding<br>mitochon-<br>drial<br>carrier<br>protein<br>Aralar2<br>(Mitochon-<br>drial<br>aspartate<br>glutamate<br>carrier 2)<br>(Solute<br>carrier<br>family 25<br>member<br>13)<br>(Citrin) | gi 1198907<br>34 | 74,177.70 | 99.80% | 2 | 2 | 2 | 0.02% | 7.85% | GLLPQLL 2.25<br>GVAPEK       | 1,334.80 |
| Control | 6006 | PREDIC<br>TED:<br>similar to<br>Calcium-<br>binding<br>mitochon-<br>drial<br>carrier<br>protein<br>Aralar2<br>(Mitochon-<br>drial<br>aspartate<br>glutamate<br>carrier 2)<br>(Solute<br>carrier<br>family 25<br>member<br>13)<br>(Citrin) | gi 1198907<br>34 | 74,177.70 | 99.80% | 2 | 2 | 2 | 0.02% | 7.85% | ITLPAPN 2.21<br>PDHVGG<br>YK | 1,578.83 |
| Control | 6006 | PREDIC<br>TED:<br>similar to<br>Calcium-<br>binding<br>mitochon-<br>drial<br>carrier<br>protein<br>Aralar2<br>(Mitochon-<br>drial<br>aspartate<br>glutamate<br>carrier 2)<br>(Solute<br>carrier<br>family 25<br>member<br>13)<br>(Citrin) | gi 1198907<br>34 | 74,177.70 | 99.80% | 2 | 2 | 2 | 0.02% | 7.85% | LQVAGEI 2.95<br>TTGPR        | 1,241.69 |



|         |      |                                                                                                                                                                          |                           |            |         |    |    |    |       |        |                                                       |          |
|---------|------|--------------------------------------------------------------------------------------------------------------------------------------------------------------------------|---------------------------|------------|---------|----|----|----|-------|--------|-------------------------------------------------------|----------|
| Control | 6006 | PREDIC TED: similar to Calcium-binding mitochondrial carrier protein Aralar2 (Mitochondrial aspartate glutamate carrier 2) (Solute carrier family 25 member 13) (Citrin) | gi 119890734              | 74,177.70  | 99.80%  | 2  | 2  | 2  | 0.02% | 7.85%  | YLNIFGE 2.98<br>SQPNPK                                | 1,506.76 |
| Control | 6006 | PREDIC TED: integrin, alpha 2 (CD49B, alpha 2 subunit of VLA-2 receptor)                                                                                                 | gi 119913150              | 148,911.70 | 99.90%  | 2  | 2  | 2  | 0.02% | 2.20%  | IFSGPSS 2.87<br>EQFGYA<br>VQQFINP<br>K                | 2,344.16 |
| Control | 6006 | PREDIC TED: integrin, alpha 2 (CD49B, alpha 2 subunit of VLA-2 receptor)                                                                                                 | gi 119913150              | 148,911.70 | 99.90%  | 2  | 2  | 2  | 0.02% | 2.20%  | VVFNLN 2.42<br>TFK                                    | 1,081.60 |
| Control | 6006 | STT3B protein                                                                                                                                                            | gi 146186621.gi 148235371 | 93,202.50  | 100.00% | 4  | 4  | 4  | 0.04% | 6.08%  | ENPPVE 2.25<br>DSSDED<br>DKRNPG<br>NLYDK              | 2,633.16 |
| Control | 6006 | STT3B protein                                                                                                                                                            | gi 146186621.gi 148235371 | 93,202.50  | 100.00% | 4  | 4  | 4  | 0.04% | 6.08%  | FGEMQL 2.91<br>DFR                                    | 1,158.53 |
| Control | 6006 | STT3B protein                                                                                                                                                            | gi 146186621.gi 148235371 | 93,202.50  | 100.00% | 4  | 4  | 4  | 0.04% | 6.08%  | HVTEQE 3.28<br>KTEEGL<br>GPNIK                        | 1,908.97 |
| Control | 6006 | STT3B protein                                                                                                                                                            | gi 146186621.gi 148235371 | 93,202.50  | 100.00% | 4  | 4  | 4  | 0.04% | 6.08%  | KHVTEQ 3.6<br>EKTEEG<br>LGPNIK                        | 2,037.06 |
| Control | 6006 | integrin alpha-V subunit                                                                                                                                                 | gi 11596385.gi 124056464  | 116,117.20 | 100.00% | 12 | 18 | 28 | 0.30% | 17.00% | ENPETEE 3.21<br>DVGPVV<br>QHIELR                      | 2,353.13 |
| Control | 6006 | integrin alpha-V subunit                                                                                                                                                 | gi 11596385.gi 124056464  | 116,117.20 | 100.00% | 12 | 18 | 28 | 0.30% | 17.00% | FGSAIAP 5.87<br>LGDLDDQ<br>DGFNDI<br>AIAAPY<br>GGEDKK | 3,165.54 |
| Control | 6006 | integrin alpha-V subunit                                                                                                                                                 | gi 11596385.gi 124056464  | 116,117.20 | 100.00% | 12 | 18 | 28 | 0.30% | 17.00% | FSVHQQ 4.41<br>SEMDTS<br>VK                           | 1,638.74 |

|         |      |                                                                                                                                                           |                                                  |            |         |    |    |    |       |        |                                      |      |          |
|---------|------|-----------------------------------------------------------------------------------------------------------------------------------------------------------|--------------------------------------------------|------------|---------|----|----|----|-------|--------|--------------------------------------|------|----------|
| Control | 6006 | integrin<br>alpha-V<br>subunit                                                                                                                            | gi 1159638<br>5,gi 124056<br>464                 | 116,117.20 | 100.00% | 12 | 18 | 28 | 0.30% | 17.00% | GALPTK<br>LDFQVE<br>LLLDKL<br>K      | 4.49 | 2,141.26 |
| Control | 6006 | integrin<br>alpha-V<br>subunit                                                                                                                            | gi 1159638<br>5,gi 124056<br>464                 | 116,117.20 | 100.00% | 12 | 18 | 28 | 0.30% | 17.00% | GATDID<br>KNGYPD<br>LIVGAFG<br>VDR   | 4.36 | 2,293.15 |
| Control | 6006 | integrin<br>alpha-V<br>subunit                                                                                                                            | gi 1159638<br>5,gi 124056<br>464                 | 116,117.20 | 100.00% | 12 | 18 | 28 | 0.30% | 17.00% | GIVYIFN<br>GRPTGL<br>NAVPSQI<br>LEGK | 5.16 | 2,543.40 |
| Control | 6006 | integrin<br>alpha-V<br>subunit                                                                                                                            | gi 1159638<br>5,gi 124056<br>464                 | 116,117.20 | 100.00% | 12 | 18 | 28 | 0.30% | 17.00% | IYIGDDN<br>PLTLIVK                   | 4.05 | 1,573.88 |
| Control | 6006 | integrin<br>alpha-V<br>subunit                                                                                                                            | gi 1159638<br>5,gi 124056<br>464                 | 116,117.20 | 100.00% | 12 | 18 | 28 | 0.30% | 17.00% | KIYIGDD<br>NPLTLIV<br>K              | 2.71 | 1,701.98 |
| Control | 6006 | integrin<br>alpha-V<br>subunit                                                                                                                            | gi 1159638<br>5,gi 124056<br>464                 | 116,117.20 | 100.00% | 12 | 18 | 28 | 0.30% | 17.00% | LNGFEV<br>FAR                        | 2.45 | 1,052.55 |
| Control | 6006 | integrin<br>alpha-V<br>subunit                                                                                                                            | gi 1159638<br>5,gi 124056<br>464                 | 116,117.20 | 100.00% | 12 | 18 | 28 | 0.30% | 17.00% | MFLLVG<br>APK                        | 3.36 | 991.5647 |
| Control | 6006 | integrin<br>alpha-V<br>subunit                                                                                                                            | gi 1159638<br>5,gi 124056<br>464                 | 116,117.20 | 100.00% | 12 | 18 | 28 | 0.30% | 17.00% | SSASFNV<br>IEFPYK                    | 3.75 | 1,488.74 |
| Control | 6006 | integrin<br>alpha-V<br>subunit                                                                                                                            | gi 1159638<br>5,gi 124056<br>464                 | 116,117.20 | 100.00% | 12 | 18 | 28 | 0.30% | 17.00% | YKENPE<br>TEEDVG<br>PVVQHI<br>YELR   | 4.42 | 2,644.29 |
| Control | 6006 | RecName<br>:<br>Full=Mo<br>nocarbox<br>ylate<br>transport<br>er 1;<br>Short=M<br>CT 1;<br>AltName:<br>Full=Solu<br>te carrier<br>family 16<br>member<br>1 | gi 1221399<br>73,gi 77567<br>740,gi 8261<br>7542 | 54,281.70  | 99.80%  | 2  | 3  | 3  | 0.03% | 3.79%  | GASDAN<br>TDLIGG<br>NPKEEK           | 3.42 | 1,815.87 |
| Control | 6006 | RecName<br>:<br>Full=Mo<br>nocarbox<br>ylate<br>transport<br>er 1;<br>Short=M<br>CT 1;<br>AltName:<br>Full=Solu<br>te carrier<br>family 16<br>member<br>1 | gi 1221399<br>73,gi 77567<br>740,gi 8261<br>7542 | 54,281.70  | 99.80%  | 2  | 3  | 3  | 0.03% | 3.79%  | GASDAN<br>TDLIGG<br>NPKEEK<br>K      | 2.96 | 1,943.97 |

|         |      |                                                                                                        |                                                                                                                                                |           |         |    |    |    |       |        |                                    |      |          |
|---------|------|--------------------------------------------------------------------------------------------------------|------------------------------------------------------------------------------------------------------------------------------------------------|-----------|---------|----|----|----|-------|--------|------------------------------------|------|----------|
| Control | 6006 | RecName<br>: Full=L-<br>lactate<br>dehydrog<br>enase B<br>chain;<br>Short=L<br>DH-B                    | gi 1185726<br>66,gi 14874<br>4825,gi 154<br>425698,gi 2<br>7806561,gi <br>59858383,g<br>i 74353944,<br>gi 8979739                              | 36,606.70 | 99.80%  | 2  | 2  | 2  | 0.02% | 7.49%  | IVADKD<br>YSVTAN<br>SK             | 2.45 | 1,510.77 |
| Control | 6006 | RecName<br>: Full=L-<br>lactate<br>dehydrog<br>enase B<br>chain;<br>Short=L<br>DH-B                    | gi 1185726<br>66,gi 14874<br>4825,gi 154<br>425698,gi 2<br>7806561,gi <br>59858383,g<br>i 74353944,<br>gi 8979739                              | 36,606.70 | 99.80%  | 2  | 2  | 2  | 0.02% | 7.49%  | MVVESA<br>YEVIK                    | 2.27 | 1,283.66 |
| Control | 6006 | PREDIC<br>TED:<br>similar to<br>program<br>med cell<br>death 6<br>interactin<br>g protein<br>isoform 1 | gi 1199142<br>74                                                                                                                               | 96,862.00 | 99.80%  | 2  | 2  | 2  | 0.02% | 2.63%  | STPVNV<br>PISQK                    | 2.34 | 1,169.65 |
| Control | 6006 | PREDIC<br>TED:<br>similar to<br>program<br>med cell<br>death 6<br>interactin<br>g protein<br>isoform 1 | gi 1199142<br>74                                                                                                                               | 96,862.00 | 99.80%  | 2  | 2  | 2  | 0.02% | 2.63%  | TMQGSE<br>VVNVLK                   | 3.93 | 1,320.68 |
| Control | 6006 | H(+)-<br>transporti<br>ng ATP<br>synthase                                                              | gi 102,gi 11<br>4402,gi 158<br>429020,gi 1<br>58429021,g<br>i 15842902<br>2,gi 158431<br>066,gi 1584<br>31067,gi 15<br>8431068,gi <br>27807237 | 55,248.00 | 100.00% | 13 | 13 | 14 | 0.15% | 35.90% | AVDSL<br>PIGR                      | 2.98 | 1,026.59 |
| Control | 6006 | H(+)-<br>transporti<br>ng ATP<br>synthase                                                              | gi 102,gi 11<br>4402,gi 158<br>429020,gi 1<br>58429021,g<br>i 15842902<br>2,gi 158431<br>066,gi 1584<br>31067,gi 15<br>8431068,gi <br>27807237 | 55,248.00 | 100.00% | 13 | 13 | 14 | 0.15% | 35.90% | EAYPGD<br>VFYLHS<br>R              | 2.08 | 1,553.74 |
| Control | 6006 | H(+)-<br>transporti<br>ng ATP<br>synthase                                                              | gi 102,gi 11<br>4402,gi 158<br>429020,gi 1<br>58429021,g<br>i 15842902<br>2,gi 158431<br>066,gi 1584<br>31067,gi 15<br>8431068,gi <br>27807237 | 55,248.00 | 100.00% | 13 | 13 | 14 | 0.15% | 35.90% | EVAafa<br>QFGSDL<br>DAATQQ<br>LLSR | 3.28 | 2,338.17 |

|         |      |                                           |                                                                                                                                                |           |         |    |    |    |       |        |                                         |          |
|---------|------|-------------------------------------------|------------------------------------------------------------------------------------------------------------------------------------------------|-----------|---------|----|----|----|-------|--------|-----------------------------------------|----------|
| Control | 6006 | H(+)-<br>transporti<br>ng ATP<br>synthase | gi 102,gi 11<br>4402,gi 158<br>429020,gi 1<br>58429021,g<br>i 15842902<br>2,gi 158431<br>066,gi 1584<br>31067,gi 15<br>8431068,gi <br>27807237 | 55,248.00 | 100.00% | 13 | 13 | 14 | 0.15% | 35.90% | FENAFLS 2.31<br>HVISQH<br>QALLSK        | 2,169.15 |
| Control | 6006 | H(+)-<br>transporti<br>ng ATP<br>synthase | gi 102,gi 11<br>4402,gi 158<br>429020,gi 1<br>58429021,g<br>i 15842902<br>2,gi 158431<br>066,gi 1584<br>31067,gi 15<br>8431068,gi <br>27807237 | 55,248.00 | 100.00% | 13 | 13 | 14 | 0.15% | 35.90% | GMSLNL 2.8<br>EPDNVG<br>VVVFGN<br>DKLIK | 2,474.30 |
| Control | 6006 | H(+)-<br>transporti<br>ng ATP<br>synthase | gi 102,gi 11<br>4402,gi 158<br>429020,gi 1<br>58429021,g<br>i 15842902<br>2,gi 158431<br>066,gi 1584<br>31067,gi 15<br>8431068,gi <br>27807237 | 55,248.00 | 100.00% | 13 | 13 | 14 | 0.15% | 35.90% | HALIYD 3.21<br>DLSK                     | 1,287.69 |
| Control | 6006 | H(+)-<br>transporti<br>ng ATP<br>synthase | gi 102,gi 11<br>4402,gi 158<br>429020,gi 1<br>58429021,g<br>i 15842902<br>2,gi 158431<br>066,gi 1584<br>31067,gi 15<br>8431068,gi <br>27807237 | 55,248.00 | 100.00% | 13 | 13 | 14 | 0.15% | 35.90% | ILGADTS 3.64<br>VDLEET<br>GR            | 1,575.79 |
| Control | 6006 | H(+)-<br>transporti<br>ng ATP<br>synthase | gi 102,gi 11<br>4402,gi 158<br>429020,gi 1<br>58429021,g<br>i 15842902<br>2,gi 158431<br>066,gi 1584<br>31067,gi 15<br>8431068,gi <br>27807237 | 55,248.00 | 100.00% | 13 | 13 | 14 | 0.15% | 35.90% | ISVREPM 2.65<br>QTGIK                   | 1,374.74 |
| Control | 6006 | H(+)-<br>transporti<br>ng ATP<br>synthase | gi 102,gi 11<br>4402,gi 158<br>429020,gi 1<br>58429021,g<br>i 15842902<br>2,gi 158431<br>066,gi 1584<br>31067,gi 15<br>8431068,gi <br>27807237 | 55,248.00 | 100.00% | 13 | 13 | 14 | 0.15% | 35.90% | ITKFENA 4.69<br>FLSHVIS<br>QHQALL<br>SK | 2,511.37 |

|         |      |                                                             |                                                                                                                                                |           |         |    |    |    |       |        |                                    |      |          |
|---------|------|-------------------------------------------------------------|------------------------------------------------------------------------------------------------------------------------------------------------|-----------|---------|----|----|----|-------|--------|------------------------------------|------|----------|
| Control | 6006 | H(+)-<br>transporti<br>ng ATP<br>synthase                   | gi 102,gi 11<br>4402,gi 158<br>429020,gi 1<br>58429021,g<br>i 15842902<br>2,gi 158431<br>066,gi 1584<br>31067,gi 15<br>8431068,gi <br>27807237 | 55,248.00 | 100.00% | 13 | 13 | 14 | 0.15% | 35.90% | TGAIVD<br>VPVGEE<br>LLGR           | 3.28 | 1,624.89 |
| Control | 6006 | H(+)-<br>transporti<br>ng ATP<br>synthase                   | gi 102,gi 11<br>4402,gi 158<br>429020,gi 1<br>58429021,g<br>i 15842902<br>2,gi 158431<br>066,gi 1584<br>31067,gi 15<br>8431068,gi <br>27807237 | 55,248.00 | 100.00% | 13 | 13 | 14 | 0.15% | 35.90% | VGLKAP<br>GIIPR                    | 2.89 | 1,120.72 |
| Control | 6006 | H(+)-<br>transporti<br>ng ATP<br>synthase                   | gi 102,gi 11<br>4402,gi 158<br>429020,gi 1<br>58429021,g<br>i 15842902<br>2,gi 158431<br>066,gi 1584<br>31067,gi 15<br>8431068,gi <br>27807237 | 55,248.00 | 100.00% | 13 | 13 | 14 | 0.15% | 35.90% | VLSIGDG<br>IAR                     | 2.36 | 1,000.58 |
| Control | 6006 | H(+)-<br>transporti<br>ng ATP<br>synthase                   | gi 102,gi 11<br>4402,gi 158<br>429020,gi 1<br>58429021,g<br>i 15842902<br>2,gi 158431<br>066,gi 1584<br>31067,gi 15<br>8431068,gi <br>27807237 | 55,248.00 | 100.00% | 13 | 13 | 14 | 0.15% | 35.90% | VVDALG<br>NAIDGK<br>GPIGSK         | 4.41 | 1,710.94 |
| Control | 6006 | SEC22<br>vesicle<br>traffickin<br>g protein<br>homolog<br>B | gi 1154964<br>88,gi 74354<br>583                                                                                                               | 28,710.00 | 100.00% | 7  | 10 | 10 | 0.11% | 41.80% | IMVANIE<br>EVLQR                   | 4.13 | 1,430.77 |
| Control | 6006 | SEC22<br>vesicle<br>traffickin<br>g protein<br>homolog<br>B | gi 1154964<br>88,gi 74354<br>583                                                                                                               | 28,710.00 | 100.00% | 7  | 10 | 10 | 0.11% | 41.80% | IMVANIE<br>EVLQRG<br>EALSAL<br>DSK | 2.72 | 2,402.26 |
| Control | 6006 | SEC22<br>vesicle<br>traffickin<br>g protein<br>homolog<br>B | gi 1154964<br>88,gi 74354<br>583                                                                                                               | 28,710.00 | 100.00% | 7  | 10 | 10 | 0.11% | 41.80% | KLAFAY<br>LEDLHS<br>EFDEQH<br>GK   | 4.16 | 2,377.15 |
| Control | 6006 | SEC22<br>vesicle<br>traffickin<br>g protein<br>homolog<br>B | gi 1154964<br>88,gi 74354<br>583                                                                                                               | 28,710.00 | 100.00% | 7  | 10 | 10 | 0.11% | 41.80% | KVPTVS<br>RPYSFIE<br>FDYIYQK       | 2.88 | 2,418.27 |

|         |      |                                                                        |                                              |           |         |   |    |    |       |        |                                                    |          |
|---------|------|------------------------------------------------------------------------|----------------------------------------------|-----------|---------|---|----|----|-------|--------|----------------------------------------------------|----------|
| Control | 6006 | SEC22 vesicle traffickin g protein homolog B                           | gi 115496488,gi 74354583                     | 28,710.00 | 100.00% | 7 | 10 | 10 | 0.11% | 41.80% | NLGSINT 4.02<br>ELQDVQ<br>R                        | 1,586.81 |
| Control | 6006 | SEC22 vesicle traffickin g protein homolog B                           | gi 115496488,gi 74354583                     | 28,710.00 | 100.00% | 7 | 10 | 10 | 0.11% | 41.80% | VADGLP 2.91<br>LAASMQ<br>EDEQSG<br>R               | 1,989.92 |
| Control | 6006 | SEC22 vesicle traffickin g protein homolog B                           | gi 115496488,gi 74354583                     | 28,710.00 | 100.00% | 7 | 10 | 10 | 0.11% | 41.80% | VADGLP 5.46<br>LAASMQ<br>EDEQSG<br>RDLQQY<br>QSQAK | 3,179.49 |
| Control | 6006 | GTP-binding protein (smg p21B)                                         | gi 163722,gi 28461271,gi 4711772,gi 74354581 | 20,806.90 | 100.00% | 4 | 4  | 5  | 0.05% | 19.60% | INVNEIF 3.75<br>YDLVR                              | 1,494.80 |
| Control | 6006 | GTP-binding protein (smg p21B)                                         | gi 163722,gi 28461271,gi 4711772,gi 74354581 | 20,806.90 | 100.00% | 4 | 4  | 5  | 0.05% | 19.60% | LVVLGS 2.97<br>GGVGK                               | 985.6042 |
| Control | 6006 | GTP-binding protein (smg p21B)                                         | gi 163722,gi 28461271,gi 4711772,gi 74354581 | 20,806.90 | 100.00% | 4 | 4  | 5  | 0.05% | 19.60% | SKINVNE 3.72<br>IFYDLVR                            | 1,709.92 |
| Control | 6006 | GTP-binding protein (smg p21B)                                         | gi 163722,gi 28461271,gi 4711772,gi 74354581 | 20,806.90 | 100.00% | 4 | 4  | 5  | 0.05% | 19.60% | YDPTIED 2.31<br>SYRK                               | 1,386.65 |
| Control | 6006 | RecName : Full=ATPase subunit g, mitochondrial; Short=ATPase subunit g | gi 2493093,gi 7435401,gi 757992,gi 944008    | 11,604.00 | 99.80%  | 2 | 4  | 6  | 0.07% | 19.20% | APALVN 3.18<br>AAVTYS<br>KPR                       | 1,557.87 |
| Control | 6006 | RecName : Full=ATPase subunit g, mitochondrial; Short=ATPase subunit g | gi 2493093,gi 7435401,gi 757992,gi 944008    | 11,604.00 | 99.80%  | 2 | 4  | 6  | 0.07% | 19.20% | NLAEKA 7.01<br>PALVNA<br>AVTYSK<br>PR              | 2,113.18 |
| Control | 6006 | guanine nucleotide binding protein (G protein), q polypeptide          | gi 158508558                                 | 42,125.60 | 100.00% | 3 | 3  | 3  | 0.03% | 15.30% | LLLLGT 3.11<br>GESGK                               | 1,087.64 |

|         |      |                                                                                         |                                                                   |           |         |   |   |   |       |        |                                          |          |
|---------|------|-----------------------------------------------------------------------------------------|-------------------------------------------------------------------|-----------|---------|---|---|---|-------|--------|------------------------------------------|----------|
| Control | 6006 | guanine<br>nucleotid<br>e binding<br>protein<br>(G<br>protein),<br>q<br>polypepti<br>de | gi 1585085<br>58                                                  | 42,125.60 | 100.00% | 3 | 3 | 3 | 0.03% | 15.30% | VADPAY 2.62<br>LPTQQD<br>VLR             | 1,685.89 |
| Control | 6006 | guanine<br>nucleotid<br>e binding<br>protein<br>(G<br>protein),<br>q<br>polypepti<br>de | gi 1585085<br>58                                                  | 42,125.60 | 100.00% | 3 | 3 | 3 | 0.03% | 15.30% | VRVPTT 5.74<br>GIIYYPF<br>DLQSVIF<br>R   | 2,450.34 |
| Control | 6006 | guanine<br>nucleotid<br>e binding<br>protein<br>(G<br>protein),<br>q<br>polypepti<br>de | gi 1585085<br>58                                                  | 42,125.60 | 100.00% | 3 | 3 | 3 | 0.03% | 15.30% | YYLNDL 3.17<br>DRVADP<br>AYLPTQ<br>QDVLR | 2,738.38 |
| Control | 6006 | PREDIC<br>TED:<br>similar to<br>CDW92<br>antigen<br>isoform 1                           | gi 1199009<br>17,gi 11990<br>0919                                 | 72,875.80 | 100.00% | 3 | 3 | 3 | 0.03% | 6.25%  | LPVPAS 3.43<br>APIPFH<br>R               | 1,548.87 |
| Control | 6006 | PREDIC<br>TED:<br>similar to<br>CDW92<br>antigen<br>isoform 1                           | gi 1199009<br>17,gi 11990<br>0919                                 | 72,875.80 | 100.00% | 3 | 3 | 3 | 0.03% | 6.25%  | NAELEAI 2.55<br>PNSGMD<br>HTHR           | 1,907.87 |
| Control | 6006 | PREDIC<br>TED:<br>similar to<br>CDW92<br>antigen<br>isoform 1                           | gi 1199009<br>17,gi 11990<br>0919                                 | 72,875.80 | 100.00% | 3 | 3 | 3 | 0.03% | 6.25%  | VLMEFV 3.13<br>ENSR                      | 1,239.60 |
| Control | 6006 | RecName<br>:<br>Full=60S<br>ribosomal<br>protein<br>L7a                                 | gi 1088609<br>39,gi 14623<br>1828,gi 836<br>38795,gi 94<br>966839 | 30,008.40 | 99.90%  | 2 | 2 | 2 | 0.02% | 10.20% | LKVPPAI 5.39<br>NQFTQA<br>LDR            | 1,811.02 |
| Control | 6006 | RecName<br>:<br>Full=60S<br>ribosomal<br>protein<br>L7a                                 | gi 1088609<br>39,gi 14623<br>1828,gi 836<br>38795,gi 94<br>966839 | 30,008.40 | 99.90%  | 2 | 2 | 2 | 0.02% | 10.20% | NFGIGQ 2.88<br>DIQPK                     | 1,216.63 |





|         |      |                                                                                                                                                                                             |                                                  |           |         |   |   |   |       |        |                                            |      |          |
|---------|------|---------------------------------------------------------------------------------------------------------------------------------------------------------------------------------------------|--------------------------------------------------|-----------|---------|---|---|---|-------|--------|--------------------------------------------|------|----------|
| Control | 6006 | RecName<br>:<br>Full=Euk<br>aryotic<br>initiation<br>factor 4A-<br>I;<br>Short=el<br>F-4A-I;<br>Short=el<br>F4A-I;<br>AltName:<br>Full=AT<br>P-<br>dependen<br>t RNA<br>helicase<br>eIF4A-1 | gi 1098924<br>71.gi 74268<br>155.gi 7773<br>5407 | 46,137.30 | 100.00% | 5 | 5 | 5 | 0.05% | 16.50% | LQMEAP<br>HIIVGTP<br>GR                    | 3.66 | 1,634.87 |
| Control | 6006 | RecName<br>:<br>Full=Euk<br>aryotic<br>initiation<br>factor 4A-<br>I;<br>Short=el<br>F-4A-I;<br>Short=el<br>F4A-I;<br>AltName:<br>Full=AT<br>P-<br>dependen<br>t RNA<br>helicase<br>eIF4A-1 | gi 1098924<br>71.gi 74268<br>155.gi 7773<br>5407 | 46,137.30 | 100.00% | 5 | 5 | 5 | 0.05% | 16.50% | VLITTDL<br>LAR                             | 3.04 | 1,114.68 |
| Control | 6006 | PREDIC<br>TED:<br>similar to<br>rat bone<br>marrow<br>stromal<br>cell<br>antigen 1<br>(BST-1)                                                                                               | gi 1198942<br>30                                 | 35,126.70 | 99.80%  | 2 | 2 | 2 | 0.02% | 4.72%  | GFFADF<br>EIPYLQK                          | 2.77 | 1,574.79 |
| Control | 6006 | PREDIC<br>TED:<br>similar to<br>rat bone<br>marrow<br>stromal<br>cell<br>antigen 1<br>(BST-1)                                                                                               | gi 1198942<br>30                                 | 35,126.70 | 99.80%  | 2 | 2 | 2 | 0.02% | 4.72%  | GFFADF<br>EIPYLQK<br>DK                    | 1.93 | 1,817.91 |
| Control | 6006 | TMPO<br>protein                                                                                                                                                                             | gi 1461868<br>41.gi 14790<br>2328                | 42,927.20 | 100.00% | 6 | 8 | 8 | 0.09% | 23.60% | GPPDFSS<br>DEEREP<br>TPVLGS<br>GAAVAG<br>R | 4.98 | 2,598.24 |
| Control | 6006 | TMPO<br>protein                                                                                                                                                                             | gi 1461868<br>41.gi 14790<br>2328                | 42,927.20 | 100.00% | 6 | 8 | 8 | 0.09% | 23.60% | HAAPILP<br>ITEFSDIP<br>R                   | 2.92 | 1,776.96 |
| Control | 6006 | TMPO<br>protein                                                                                                                                                                             | gi 1461868<br>41.gi 14790<br>2328                | 42,927.20 | 100.00% | 6 | 8 | 8 | 0.09% | 23.60% | LKSELV<br>ANNVTL<br>PAGEQR                 | 3.39 | 1,939.06 |

|         |      |                         |                                        |            |         |   |   |   |       |        |                                      |      |          |
|---------|------|-------------------------|----------------------------------------|------------|---------|---|---|---|-------|--------|--------------------------------------|------|----------|
| Control | 6006 | TMPO protein            | gi 146186841.gi 147902328              | 42,927.20  | 100.00% | 6 | 8 | 8 | 0.09% | 23.60% | LKSELV<br>ANNVTL<br>PAGEQR<br>K      | 3.92 | 2,067.16 |
| Control | 6006 | TMPO protein            | gi 146186841.gi 147902328              | 42,927.20  | 100.00% | 6 | 8 | 8 | 0.09% | 23.60% | SSTPLPT<br>ISSSVEN<br>TR             | 2.65 | 1,675.85 |
| Control | 6006 | TMPO protein            | gi 146186841.gi 147902328              | 42,927.20  | 100.00% | 6 | 8 | 8 | 0.09% | 23.60% | YGVNPG<br>PIVGTR                     | 3.29 | 1,330.71 |
| Control | 6006 | PREDICTED: talin 1      | gi 119900517                           | 269,759.80 | 100.00% | 6 | 6 | 6 | 0.07% | 4.01%  | GLAGAV<br>SELLR                      | 2.97 | 1,085.63 |
| Control | 6006 | PREDICTED: talin 1      | gi 119900517                           | 269,759.80 | 100.00% | 6 | 6 | 6 | 0.07% | 4.01%  | LAQAAQ<br>SSVATIT<br>R               | 4.28 | 1,416.78 |
| Control | 6006 | PREDICTED: talin 1      | gi 119900517                           | 269,759.80 | 100.00% | 6 | 6 | 6 | 0.07% | 4.01%  | LLAALL<br>EDEGGS<br>GRPLLQ<br>AAK    | 3.18 | 2,122.19 |
| Control | 6006 | PREDICTED: talin 1      | gi 119900517                           | 269,759.80 | 100.00% | 6 | 6 | 6 | 0.07% | 4.01%  | LNEAAA<br>GLNQAA<br>TELVQA<br>SR     | 3.07 | 2,027.05 |
| Control | 6006 | PREDICTED: talin 1      | gi 119900517                           | 269,759.80 | 100.00% | 6 | 6 | 6 | 0.07% | 4.01%  | QAAASA<br>TQTIAA<br>AQHATS<br>TPK    | 3.49 | 2,025.04 |
| Control | 6006 | PREDICTED: talin 1      | gi 119900517                           | 269,759.80 | 100.00% | 6 | 6 | 6 | 0.07% | 4.01%  | TLSHQP<br>QMALLD<br>QTK              | 3.96 | 1,726.88 |
| Control | 6006 | SLC25A12 protein        | gi 151556133.gi 155372111              | 74,513.90  | 100.00% | 7 | 7 | 7 | 0.08% | 15.00% | FKPPSVA<br>VVQPK                     | 3.67 | 1,296.77 |
| Control | 6006 | SLC25A12 protein        | gi 151556133.gi 155372111              | 74,513.90  | 100.00% | 7 | 7 | 7 | 0.08% | 15.00% | GLIPQLI<br>GVAPEK                    | 2.25 | 1,334.80 |
| Control | 6006 | SLC25A12 protein        | gi 151556133.gi 155372111              | 74,513.90  | 100.00% | 7 | 7 | 7 | 0.08% | 15.00% | IAPLAEG<br>ALPYNL<br>AELQR           | 3.27 | 1,939.06 |
| Control | 6006 | SLC25A12 protein        | gi 151556133.gi 155372111              | 74,513.90  | 100.00% | 7 | 7 | 7 | 0.08% | 15.00% | LQVAGEI<br>TTGPR                     | 2.95 | 1,241.69 |
| Control | 6006 | SLC25A12 protein        | gi 151556133.gi 155372111              | 74,513.90  | 100.00% | 7 | 7 | 7 | 0.08% | 15.00% | LTLADIE<br>R                         | 2.34 | 930.5256 |
| Control | 6006 | SLC25A12 protein        | gi 151556133.gi 155372111              | 74,513.90  | 100.00% | 7 | 7 | 7 | 0.08% | 15.00% | NIFLQYA<br>STVDG<br>EHYMTP<br>EDFVQR | 3.71 | 3,005.36 |
| Control | 6006 | SLC25A12 protein        | gi 151556133.gi 155372111              | 74,513.90  | 100.00% | 7 | 7 | 7 | 0.08% | 15.00% | YLGLYN<br>DPNSNP<br>K                | 3.23 | 1,494.72 |
| Control | 6006 | ALDH3A2 protein         | gi 151557095.gi 156120617              | 54,059.30  | 99.80%  | 2 | 3 | 3 | 0.03% | 4.95%  | IAFGGE<br>MDEATR                     | 2.17 | 1,312.58 |
| Control | 6006 | ALDH3A2 protein         | gi 151557095.gi 156120617              | 54,059.30  | 99.80%  | 2 | 3 | 3 | 0.03% | 4.95%  | NADEAI<br>QFINER                     | 3    | 1,419.69 |
| Control | 6006 | IKK interacting protein | gi 126010633.gi 126165284.gi 193806036 | 39,199.60  | 100.00% | 3 | 3 | 3 | 0.03% | 13.80% | METSEF<br>QGLQSK                     | 3.48 | 1,400.64 |
| Control | 6006 | IKK interacting protein | gi 126010633.gi 126165284.gi 193806036 | 39,199.60  | 100.00% | 3 | 3 | 3 | 0.03% | 13.80% | MSGLVT<br>DVTSLT<br>DSVQEL<br>ENKIEK | 3.04 | 2,652.33 |

|         |      |                                                                                           |                                                                                 |            |         |   |   |   |       |        |                                         |          |
|---------|------|-------------------------------------------------------------------------------------------|---------------------------------------------------------------------------------|------------|---------|---|---|---|-------|--------|-----------------------------------------|----------|
| Control | 6006 | IKK<br>interactin<br>g protein                                                            | gi 1260106<br>33,gi 12616<br>5284,gi 193<br>806036                              | 39,199.60  | 100.00% | 3 | 3 | 3 | 0.03% | 13.80% | NIGDLLS 3.35<br>SSIDR                   | 1,289.67 |
| Control | 6006 | defender<br>against<br>cell death<br>1                                                    | gi 5985836<br>1,gi 739189<br>63,gi 74354<br>770,gi 7773<br>6467,gi 832<br>86811 | 12,477.50  | 99.80%  | 2 | 2 | 4 | 0.04% | 19.50% | ADFQGIS 3.16<br>PER                     | 1,119.54 |
| Control | 6006 | defender<br>against<br>cell death<br>1                                                    | gi 5985836<br>1,gi 739189<br>63,gi 74354<br>770,gi 7773<br>6467,gi 832<br>86811 | 12,477.50  | 99.80%  | 2 | 2 | 4 | 0.04% | 19.50% | FLEEYLS 2.39<br>ATPQR                   | 1,453.73 |
| Control | 6006 | PREDIC<br>TED:<br>similar to<br>optic<br>atrophy 1<br>isoform<br>16                       | gi 1946636<br>97                                                                | 115,574.20 | 100.00% | 5 | 5 | 6 | 0.07% | 7.62%  | ESVEQQ 2.76<br>ADSFK                    | 1,267.58 |
| Control | 6006 | PREDIC<br>TED:<br>similar to<br>optic<br>atrophy 1<br>isoform<br>16                       | gi 1946636<br>97                                                                | 115,574.20 | 100.00% | 5 | 5 | 6 | 0.07% | 7.62%  | GNSSESI 3.96<br>EAIRDYE<br>EEFFQNS<br>K | 2,579.15 |
| Control | 6006 | PREDIC<br>TED:<br>similar to<br>optic<br>atrophy 1<br>isoform<br>16                       | gi 1946636<br>97                                                                | 115,574.20 | 100.00% | 5 | 5 | 6 | 0.07% | 7.62%  | MLAITA 3.07<br>NTRLR                    | 1,119.62 |
| Control | 6006 | PREDIC<br>TED:<br>similar to<br>optic<br>atrophy 1<br>isoform<br>16                       | gi 1946636<br>97                                                                | 115,574.20 | 100.00% | 5 | 5 | 6 | 0.07% | 7.62%  | VDLAEK 3.12<br>NVTSPS<br>R              | 1,415.75 |
| Control | 6006 | PREDIC<br>TED:<br>similar to<br>optic<br>atrophy 1<br>isoform<br>16                       | gi 1946636<br>97                                                                | 115,574.20 | 100.00% | 5 | 5 | 6 | 0.07% | 7.62%  | VSDKEKI 2.73<br>DQLQEE<br>LLHTQL<br>K   | 2,394.29 |
| Control | 6006 | PREDIC<br>TED:<br>heterogen<br>eous<br>nuclear<br>ribonucle<br>oprotein<br>M<br>isoform 2 | gi 1198948<br>63                                                                | 77,466.20  | 100.00% | 5 | 5 | 5 | 0.05% | 9.73%  | AFITNIPF 2.9<br>DVK                     | 1,264.69 |
| Control | 6006 | PREDIC<br>TED:<br>heterogen<br>eous<br>nuclear<br>ribonucle<br>oprotein<br>M<br>isoform 2 | gi 1198948<br>63                                                                | 77,466.20  | 100.00% | 5 | 5 | 5 | 0.05% | 9.73%  | GGNRFE 4.15<br>PYANPT<br>KR             | 1,606.81 |

|         |      |                                                                            |                                                                 |           |         |   |   |   |       |        |                                        |      |          |
|---------|------|----------------------------------------------------------------------------|-----------------------------------------------------------------|-----------|---------|---|---|---|-------|--------|----------------------------------------|------|----------|
| Control | 6006 | PREDICTED:<br>heterogeneous<br>nuclear<br>ribonucleoprotein<br>M isoform 2 | gi 1198948<br>63                                                | 77,466.20 | 100.00% | 5 | 5 | 5 | 0.05% | 9.73%  | GNFGGS<br>FAGSFG<br>GAGGHA<br>PGVAR    | 3.68 | 2,034.95 |
| Control | 6006 | PREDICTED:<br>heterogeneous<br>nuclear<br>ribonucleoprotein<br>M isoform 2 | gi 1198948<br>63                                                | 77,466.20 | 100.00% | 5 | 5 | 5 | 0.05% | 9.73%  | INEILSN<br>ALK                         | 2.61 | 1,114.65 |
| Control | 6006 | PREDICTED:<br>heterogeneous<br>nuclear<br>ribonucleoprotein<br>M isoform 2 | gi 1198948<br>63                                                | 77,466.20 | 100.00% | 5 | 5 | 5 | 0.05% | 9.73%  | LKEVFS<br>MAGVV<br>VR                  | 3.54 | 1,450.81 |
| Control | 6006 | Prostaglandin I2 (prostanoid) synthase 23                                  | gi 1123623<br>85,gi 24933<br>72,gi 27806<br>107,gi 5385         | 56,613.60 | 100.00% | 6 | 8 | 9 | 0.10% | 16.20% | ELQALT<br>DAMYTN<br>LR                 | 3.34 | 1,654.81 |
| Control | 6006 | Prostaglandin I2 (prostanoid) synthase 23                                  | gi 1123623<br>85,gi 24933<br>72,gi 27806<br>107,gi 5385         | 56,613.60 | 100.00% | 6 | 8 | 9 | 0.10% | 16.20% | LLLFPFL<br>SPQKDP<br>EIYTDPE<br>VFK    | 4.01 | 2,736.45 |
| Control | 6006 | Prostaglandin I2 (prostanoid) synthase 23                                  | gi 1123623<br>85,gi 24933<br>72,gi 27806<br>107,gi 5385         | 56,613.60 | 100.00% | 6 | 8 | 9 | 0.10% | 16.20% | LLLFPFL<br>SPQKDP<br>EIYTDPE<br>VFKYNR | 3.88 | 3,169.66 |
| Control | 6006 | Prostaglandin I2 (prostanoid) synthase 23                                  | gi 1123623<br>85,gi 24933<br>72,gi 27806<br>107,gi 5385         | 56,613.60 | 100.00% | 6 | 8 | 9 | 0.10% | 16.20% | LTAAPFI<br>TR                          | 2.64 | 989.5779 |
| Control | 6006 | Prostaglandin I2 (prostanoid) synthase 23                                  | gi 1123623<br>85,gi 24933<br>72,gi 27806<br>107,gi 5385         | 56,613.60 | 100.00% | 6 | 8 | 9 | 0.10% | 16.20% | VLDSMP<br>VLDSVL<br>SESLR              | 3.09 | 1,875.97 |
| Control | 6006 | Prostaglandin I2 (prostanoid) synthase 23                                  | gi 1123623<br>85,gi 24933<br>72,gi 27806<br>107,gi 5385         | 56,613.60 | 100.00% | 6 | 8 | 9 | 0.10% | 16.20% | YGFGLM<br>QPEHDV<br>PVR                | 2.35 | 1,760.84 |
| Control | 6006 | metalloproteinase                                                          | gi 1044811,<br>gi 1577429<br>33,gi 27806<br>209,gi 2983<br>9751 | 84,171.20 | 99.80%  | 2 | 2 | 2 | 0.02% | 4.01%  | AIDTIYQ<br>TTDFSGI<br>R                | 2.86 | 1,700.85 |
| Control | 6006 | metalloproteinase                                                          | gi 1044811,<br>gi 1577429<br>33,gi 27806<br>209,gi 2983<br>9751 | 84,171.20 | 99.80%  | 2 | 2 | 2 | 0.02% | 4.01%  | HYEGLS<br>YDVDSL<br>HQK                | 3.81 | 1,790.83 |

|         |      |                     |                                                              |           |         |   |   |     |       |        |                                                                      |          |
|---------|------|---------------------|--------------------------------------------------------------|-----------|---------|---|---|-----|-------|--------|----------------------------------------------------------------------|----------|
| Control | 6006 | tubulin, beta       | gi 1140527<br>31.gi 14623<br>1774.gi 868<br>23832            | 49,652.60 | 100.00% | 3 | 4 | 5   | 0.05% | 36.70% | AILVDLE 3.4<br>PGTMDS<br>VR                                          | 1,631.83 |
| Control | 6006 | tubulin, beta       | gi 1140527<br>31.gi 14623<br>1774.gi 868<br>23832            | 49,652.60 | 100.00% | 3 | 4 | 5   | 0.05% | 36.70% | ALTVPE 2.17<br>LTQQVF<br>DAK                                         | 1,659.90 |
| Control | 6006 | tubulin, beta       | gi 1140527<br>31.gi 14623<br>1774.gi 868<br>23832            | 49,652.60 | 100.00% | 3 | 4 | 5   | 0.05% | 36.70% | GHYTEG 3.49<br>AELVDS<br>VLDVVR                                      | 1,958.98 |
| Control | 6006 | tubulin, beta       | gi 1140527<br>31.gi 14623<br>1774.gi 868<br>23832            | 49,652.60 | 100.00% | 3 | 4 | 5   | 0.05% | 36.70% | GHYTEG 3.77<br>AELVDS<br>VLDVVR<br>K                                 | 2,087.08 |
| Control | 6006 | tubulin, beta       | gi 1140527<br>31.gi 14623<br>1774.gi 868<br>23832            | 49,652.60 | 100.00% | 3 | 4 | 5   | 0.05% | 36.70% | IMNTFSV 3.05<br>VPSPK                                                | 1,335.70 |
| Control | 6006 | tubulin, beta       | gi 1140527<br>31.gi 14623<br>1774.gi 868<br>23832            | 49,652.60 | 100.00% | 3 | 4 | 5   | 0.05% | 36.70% | IREEYPD 2.98<br>RIMNTFS<br>VVSPK                                     | 2,394.21 |
| Control | 6006 | tubulin, beta       | gi 1140527<br>31.gi 14623<br>1774.gi 868<br>23832            | 49,652.60 | 100.00% | 3 | 4 | 5   | 0.05% | 36.70% | ISEQFTA 2.73<br>MFR                                                  | 1,245.59 |
| Control | 6006 | tubulin, beta       | gi 1140527<br>31.gi 14623<br>1774.gi 868<br>23832            | 49,652.60 | 100.00% | 3 | 4 | 5   | 0.05% | 36.70% | ISVYYNE 3.54<br>ATGGK                                                | 1,301.64 |
| Control | 6006 | tubulin, beta       | gi 1140527<br>31.gi 14623<br>1774.gi 868<br>23832            | 49,652.60 | 100.00% | 3 | 4 | 5   | 0.05% | 36.70% | LAVNMV 3.44<br>PFPR                                                  | 1,159.63 |
| Control | 6006 | tubulin, beta       | gi 1140527<br>31.gi 14623<br>1774.gi 868<br>23832            | 49,652.60 | 100.00% | 3 | 4 | 5   | 0.05% | 36.70% | LHFMP 3.02<br>GFAPLTS<br>R                                           | 1,636.83 |
| Control | 6006 | tubulin, beta       | gi 1140527<br>31.gi 14623<br>1774.gi 868<br>23832            | 49,652.60 | 100.00% | 3 | 4 | 5   | 0.05% | 36.70% | VSDTVV 5.68<br>EPYNAT<br>LSVHQL<br>VENTDE<br>TYCIDNE<br>ALYDICF<br>R | 4,479.06 |
| Control | 6006 | tubulin, beta       | gi 1140527<br>31.gi 14623<br>1774.gi 868<br>23832            | 49,652.60 | 100.00% | 3 | 4 | 5   | 0.05% | 36.70% | YLTVA 2.82<br>VFR                                                    | 1,039.59 |
| Control | 6006 | RAP2B protein       | gi 1340251<br>88.gi 15442<br>5870.gi 156<br>523174           | 20,470.40 | 99.80%  | 2 | 2 | 2   | 0.02% | 7.65%  | ASVDEL 2.41<br>FAEIVR                                                | 1,348.71 |
| Control | 6006 | RAP2B protein       | gi 1340251<br>88.gi 15442<br>5870.gi 156<br>523174           | 20,470.40 | 99.80%  | 2 | 2 | 2   | 0.02% | 7.65%  | NKASVD 4.2<br>ELFAEIV<br>R                                           | 1,590.85 |
| Control | 6006 | Hemoglobin, gamma 2 | gi 1584550<br>08.gi 16033<br>3301.gi 393<br>.gi 6246049<br>4 | 15,841.20 | 100.00% | 7 | 9 | 416 | 4.52% | 62.80% | AAVTSL 2.69<br>FAK                                                   | 907.5247 |
| Control | 6006 | Hemoglobin, gamma 2 | gi 1584550<br>08.gi 16033<br>3301.gi 393<br>.gi 6246049<br>4 | 15,841.20 | 100.00% | 7 | 9 | 416 | 4.52% | 62.80% | FFESFGD 2.52<br>LSSADAI<br>LGNPK                                     | 2,014.98 |

|         |      |                                                         |                                                                          |            |         |    |    |     |       |        |                                   |          |
|---------|------|---------------------------------------------------------|--------------------------------------------------------------------------|------------|---------|----|----|-----|-------|--------|-----------------------------------|----------|
| Control | 6006 | Hemoglobin, gamma 2                                     | gi 158455008,gi 160333301,gi 393,gi 62460494                             | 15,841.20  | 100.00% | 7  | 9  | 416 | 4.52% | 62.80% | LLGNVL 4.74<br>VVVLAR             | 1,265.83 |
| Control | 6006 | Hemoglobin, gamma 2                                     | gi 158455008,gi 160333301,gi 393,gi 62460494                             | 15,841.20  | 100.00% | 7  | 9  | 416 | 4.52% | 62.80% | LLVVYP 3.19<br>WTQR               | 1,274.73 |
| Control | 6006 | Hemoglobin, gamma 2                                     | gi 158455008,gi 160333301,gi 393,gi 62460494                             | 15,841.20  | 100.00% | 7  | 9  | 416 | 4.52% | 62.80% | RFGSEFS 2.82<br>PELQASF<br>QK     | 1,857.91 |
| Control | 6006 | Hemoglobin, gamma 2                                     | gi 158455008,gi 160333301,gi 393,gi 62460494                             | 15,841.20  | 100.00% | 7  | 9  | 416 | 4.52% | 62.80% | VKVDEV 4.12<br>GGEALG<br>R        | 1,328.72 |
| Control | 6006 | Hemoglobin, gamma 2                                     | gi 158455008,gi 160333301,gi 393,gi 62460494                             | 15,841.20  | 100.00% | 7  | 9  | 416 | 4.52% | 62.80% | VVTGVA 4.1<br>NALAHR              | 1,207.69 |
| Control | 6006 | Ribosomal protein L6                                    | gi 126717393,gi 58760432,gi 61553343,gi 61553350,gi 67461090,gi 72534798 | 32,672.90  | 99.80%  | 2  | 2  | 2   | 0.02% | 10.50% | AVPQLQ 2.46<br>GYLR               | 1,144.65 |
| Control | 6006 | Ribosomal protein L6                                    | gi 126717393,gi 58760432,gi 61553343,gi 61553350,gi 67461090,gi 72534798 | 32,672.90  | 99.80%  | 2  | 2  | 2   | 0.02% | 10.50% | HQEGEIF 3.76<br>DTEREK<br>YEITEQR | 2,537.19 |
| Control | 6006 | PREDICTED: filamin A, alpha (actin binding protein 280) | gi 194680254                                                             | 276,424.10 | 100.00% | 11 | 12 | 12  | 0.13% | 7.49%  | AFGPGL 4.02<br>QGSAG<br>SPAR      | 1,429.72 |
| Control | 6006 | PREDICTED: filamin A, alpha (actin binding protein 280) | gi 194680254                                                             | 276,424.10 | 100.00% | 11 | 12 | 12  | 0.13% | 7.49%  | ANLPQS 2.85<br>FQVDT<br>K         | 1,434.72 |
| Control | 6006 | PREDICTED: filamin A, alpha (actin binding protein 280) | gi 194680254                                                             | 276,424.10 | 100.00% | 11 | 12 | 12  | 0.13% | 7.49%  | AYGPGIE 3.64<br>PTGNM<br>K        | 1,449.70 |

|         |      |                                                                               |                  |            |         |    |    |    |       |       |                                     |      |          |
|---------|------|-------------------------------------------------------------------------------|------------------|------------|---------|----|----|----|-------|-------|-------------------------------------|------|----------|
| Control | 6006 | PREDIC<br>TED:<br>filamin<br>A, alpha<br>(actin<br>binding<br>protein<br>280) | gi 1946802<br>54 | 276,424.10 | 100.00% | 11 | 12 | 12 | 0.13% | 7.49% | FNEEHIP<br>DSPFVV<br>PVASPS<br>GDAR | 2.76 | 2,467.19 |
| Control | 6006 | PREDIC<br>TED:<br>filamin<br>A, alpha<br>(actin<br>binding<br>protein<br>280) | gi 1946802<br>54 | 276,424.10 | 100.00% | 11 | 12 | 12 | 0.13% | 7.49% | GAGTGG<br>LGLAVE<br>GPSEAK          | 4.38 | 1,570.81 |
| Control | 6006 | PREDIC<br>TED:<br>filamin<br>A, alpha<br>(actin<br>binding<br>protein<br>280) | gi 1946802<br>54 | 276,424.10 | 100.00% | 11 | 12 | 12 | 0.13% | 7.49% | IANLQT<br>DLSDGL<br>R               | 3.27 | 1,415.75 |
| Control | 6006 | PREDIC<br>TED:<br>filamin<br>A, alpha<br>(actin<br>binding<br>protein<br>280) | gi 1946802<br>54 | 276,424.10 | 100.00% | 11 | 12 | 12 | 0.13% | 7.49% | LIALLEV<br>LSQK                     | 2.52 | 1,226.77 |
| Control | 6006 | PREDIC<br>TED:<br>filamin<br>A, alpha<br>(actin<br>binding<br>protein<br>280) | gi 1946802<br>54 | 276,424.10 | 100.00% | 11 | 12 | 12 | 0.13% | 7.49% | SPFEVY<br>VDKSQG<br>DASK            | 3.71 | 1,756.84 |
| Control | 6006 | PREDIC<br>TED:<br>filamin<br>A, alpha<br>(actin<br>binding<br>protein<br>280) | gi 1946802<br>54 | 276,424.10 | 100.00% | 11 | 12 | 12 | 0.13% | 7.49% | SPFSVG<br>VSPSLDL<br>SK             | 4.05 | 1,519.80 |
| Control | 6006 | PREDIC<br>TED:<br>filamin<br>A, alpha<br>(actin<br>binding<br>protein<br>280) | gi 1946802<br>54 | 276,424.10 | 100.00% | 11 | 12 | 12 | 0.13% | 7.49% | VAQPAIT<br>DNKDGT<br>VTVR           | 2.38 | 1,784.95 |
| Control | 6006 | PREDIC<br>TED:<br>filamin<br>A, alpha<br>(actin<br>binding<br>protein<br>280) | gi 1946802<br>54 | 276,424.10 | 100.00% | 11 | 12 | 12 | 0.13% | 7.49% | VTAQGP<br>GLEPSG<br>NIANK           | 4.79 | 1,652.86 |

|         |      |                                                                              |                                        |            |         |    |    |    |       |        |                                    |      |          |
|---------|------|------------------------------------------------------------------------------|----------------------------------------|------------|---------|----|----|----|-------|--------|------------------------------------|------|----------|
| Control | 6006 | PREDICTED:<br>filamin A, alpha (actin binding protein 280)                   | gi 194680254                           | 276,424.10 | 100.00% | 11 | 12 | 12 | 0.13% | 7.49%  | YTPVQQ<br>GPVGIN<br>VTYGGD<br>AIPK | 3.21 | 2,274.18 |
| Control | 6006 | NRAS protein                                                                 | gi 146186548,gi 148226664              | 21,211.30  | 99.80%  | 2  | 2  | 2  | 0.02% | 12.20% | SFADINL<br>YR                      | 2.57 | 1,098.56 |
| Control | 6006 | NRAS protein                                                                 | gi 146186548,gi 148226664              | 21,211.30  | 99.80%  | 2  | 2  | 2  | 0.02% | 12.20% | TRQGVV<br>DAFYTL<br>VR             | 3.22 | 1,654.85 |
| Control | 6006 | PI4K2A protein                                                               | gi 151554868,gi 154152033              | 54,067.10  | 99.80%  | 2  | 2  | 2  | 0.02% | 6.89%  | ERNEFPE<br>DPEFEA<br>VVR           | 4.67 | 1,962.92 |
| Control | 6006 | PI4K2A protein                                                               | gi 151554868,gi 154152033              | 54,067.10  | 99.80%  | 2  | 2  | 2  | 0.02% | 6.89%  | IYQGSSG<br>SYFVKD<br>PQGK          | 2.14 | 1,860.91 |
| Control | 6006 | synaptosomal-associated protein 23                                           | gi 115496868,gi 152941114,gi 83405332  | 23,209.50  | 100.00% | 6  | 8  | 12 | 0.13% | 29.40% | ANQVTD<br>ESLESTR                  | 3.34 | 1,449.68 |
| Control | 6006 | synaptosomal-associated protein 23                                           | gi 115496868,gi 152941114,gi 83405332  | 23,209.50  | 100.00% | 6  | 8  | 12 | 0.13% | 29.40% | ILGLAIE<br>SQDAGI<br>K             | 4.34 | 1,427.81 |
| Control | 6006 | synaptosomal-associated protein 23                                           | gi 115496868,gi 152941114,gi 83405332  | 23,209.50  | 100.00% | 6  | 8  | 12 | 0.13% | 29.40% | TITMLDE<br>QGEQLK                  | 3.68 | 1,521.75 |
| Control | 6006 | synaptosomal-associated protein 23                                           | gi 115496868,gi 152941114,gi 83405332  | 23,209.50  | 100.00% | 6  | 8  | 12 | 0.13% | 29.40% | TITMLDE<br>QGEQLK<br>R             | 2.54 | 1,677.85 |
| Control | 6006 | synaptosomal-associated protein 23                                           | gi 115496868,gi 152941114,gi 83405332  | 23,209.50  | 100.00% | 6  | 8  | 12 | 0.13% | 29.40% | VTNGQP<br>QQATAG<br>AASGGY<br>IK   | 3.45 | 1,918.96 |
| Control | 6006 | synaptosomal-associated protein 23                                           | gi 115496868,gi 152941114,gi 83405332  | 23,209.50  | 100.00% | 6  | 8  | 12 | 0.13% | 29.40% | VTNGQP<br>QQATAG<br>AASGGY<br>IKR  | 2.96 | 2,075.06 |
| Control | 6006 | LBR protein                                                                  | gi 151557087,gi 154152031              | 71,240.40  | 100.00% | 3  | 4  | 4  | 0.04% | 7.41%  | FHLSQES<br>SYIPTQY<br>SLR          | 2.71 | 2,056.01 |
| Control | 6006 | LBR protein                                                                  | gi 151557087,gi 154152031              | 71,240.40  | 100.00% | 3  | 4  | 4  | 0.04% | 7.41%  | LTPLVL<br>KPFGNSI<br>NR            | 2.07 | 1,668.98 |
| Control | 6006 | LBR protein                                                                  | gi 151557087,gi 154152031              | 71,240.40  | 100.00% | 3  | 4  | 4  | 0.04% | 7.41%  | SASASY<br>QADLKE<br>AR             | 3.24 | 1,496.73 |
| Control | 6006 | Solute carrier family 1 (glutamate/neutral amino acid transporter), member 4 | gi 124828540,gi 126158903,gi 145566947 | 55,991.00  | 99.80%  | 2  | 2  | 2  | 0.02% | 4.53%  | ETVDSFL<br>DLTR                    | 2.79 | 1,295.65 |



|         |      |                                                                                                       |                                        |           |         |   |   |    |       |        |                           |      |          |
|---------|------|-------------------------------------------------------------------------------------------------------|----------------------------------------|-----------|---------|---|---|----|-------|--------|---------------------------|------|----------|
| Control | 6006 | Solute carrier family 1 (glutamate/neutral amino acid transporter), member 4                          | gi 124828540,gi 126158903,gi 145566947 | 55,991.00 | 99.80%  | 2 | 2 | 2  | 0.02% | 4.53%  | NLFPSNL VVAEFR            | 2.74 | 1,447.81 |
| Control | 6006 | PREDICTED: ubiquitin C isoform 12                                                                     | gi 76638716                            | 77,556.00 | 100.00% | 5 | 8 | 13 | 0.14% | 7.68%  | ESTLHL VLR                | 3.07 | 1,067.62 |
| Control | 6006 | PREDICTED: ubiquitin C isoform 12                                                                     | gi 76638716                            | 77,556.00 | 100.00% | 5 | 8 | 13 | 0.14% | 7.68%  | IQDKEGI PPDQQR            | 2.68 | 1,523.78 |
| Control | 6006 | PREDICTED: ubiquitin C isoform 12                                                                     | gi 76638716                            | 77,556.00 | 100.00% | 5 | 8 | 13 | 0.14% | 7.68%  | QLEDGR TBSDYNI QK         | 2.93 | 1,779.89 |
| Control | 6006 | PREDICTED: ubiquitin C isoform 12                                                                     | gi 76638716                            | 77,556.00 | 100.00% | 5 | 8 | 13 | 0.14% | 7.68%  | TITLEVE PSDTIEN VK        | 3.02 | 1,787.93 |
| Control | 6006 | PREDICTED: ubiquitin C isoform 12                                                                     | gi 76638716                            | 77,556.00 | 100.00% | 5 | 8 | 13 | 0.14% | 7.68%  | TBSDYNI QKSTL HLVL        | 2.54 | 2,130.16 |
| Control | 6006 | TPA: predicted NADPH oxidase-5                                                                        | gi 151427572,gi 155372001              | 86,454.40 | 99.80%  | 2 | 2 | 3  | 0.03% | 4.90%  | MAALHI VEVNLL PSK         | 3.8  | 1,650.92 |
| Control | 6006 | TPA: predicted NADPH oxidase-5                                                                        | gi 151427572,gi 155372001              | 86,454.40 | 99.80%  | 2 | 2 | 3  | 0.03% | 4.90%  | RPPLFHY RPGDYL YLNIPSI AR | 2.43 | 2,658.43 |
| Control | 6006 | RecName: Full=Small nuclear ribonucleoprotein Sm D1; Short=Sm-D1; AltName: Full=snRNP core protein D1 | gi 109894869,gi 73586929,gi 78050059   | 13,263.90 | 99.80%  | 2 | 2 | 2  | 0.02% | 27.70% | NREPVQ LETLSIR            | 3.7  | 1,554.86 |

|         |      |                                                                                                                                                   |                                                  |            |         |    |    |    |       |        |                                     |      |          |
|---------|------|---------------------------------------------------------------------------------------------------------------------------------------------------|--------------------------------------------------|------------|---------|----|----|----|-------|--------|-------------------------------------|------|----------|
| Control | 6006 | RecName<br>:<br>Full=Sma<br>ll nuclear<br>ribonucle<br>oprotein<br>Sm D1;<br>Short=S<br>m-D1;<br>AltName:<br>Full=snR<br>NP core<br>protein<br>D1 | gi 1098948<br>69,gi 73586<br>929,gi 7805<br>0059 | 13,263.90  | 99.80%  | 2  | 2  | 2  | 0.02% | 27.70% | YFILPDS<br>LPLDTLL<br>VDVEPK        | 3.14 | 2,287.25 |
| Control | 6006 | PREDIC<br>TED:<br>ATPase,<br>Ca++<br>transporti<br>ng,<br>cardiac<br>muscle,<br>slow<br>twitch 2<br>isoform 1                                     | gi 7663901<br>9                                  | 109,762.30 | 100.00% | 16 | 20 | 21 | 0.23% | 23.20% | AFTGRE<br>FDELSPS<br>AQR            | 4.08 | 1,810.87 |
| Control | 6006 | PREDIC<br>TED:<br>ATPase,<br>Ca++<br>transporti<br>ng,<br>cardiac<br>muscle,<br>slow<br>twitch 2<br>isoform 1                                     | gi 7663901<br>9                                  | 109,762.30 | 100.00% | 16 | 20 | 21 | 0.23% | 23.20% | AKDIVP<br>GDIVEIA<br>VGDKVP<br>ADIR | 3.53 | 2,390.33 |
| Control | 6006 | PREDIC<br>TED:<br>ATPase,<br>Ca++<br>transporti<br>ng,<br>cardiac<br>muscle,<br>slow<br>twitch 2<br>isoform 1                                     | gi 7663901<br>9                                  | 109,762.30 | 100.00% | 16 | 20 | 21 | 0.23% | 23.20% | AMGVV<br>VATGVN<br>TEIGK            | 4.1  | 1,561.83 |
| Control | 6006 | PREDIC<br>TED:<br>ATPase,<br>Ca++<br>transporti<br>ng,<br>cardiac<br>muscle,<br>slow<br>twitch 2<br>isoform 1                                     | gi 7663901<br>9                                  | 109,762.30 | 100.00% | 16 | 20 | 21 | 0.23% | 23.20% | EEMNLE<br>DSANFIK                   | 2.82 | 1,555.69 |

|         |      |                                                                               |            |            |         |    |    |    |       |        |                            |      |          |
|---------|------|-------------------------------------------------------------------------------|------------|------------|---------|----|----|----|-------|--------|----------------------------|------|----------|
| Control | 6006 | PREDICTED: ATPase, Ca++ transporting, cardiac muscle, slow twitch 2 isoform 1 | gi 7663901 | 109,762.30 | 100.00% | 16 | 20 | 21 | 0.23% | 23.20% | EFTLEFSR                   | 1.87 | 1,028.50 |
| Control | 6006 | PREDICTED: ATPase, Ca++ transporting, cardiac muscle, slow twitch 2 isoform 1 | gi 7663901 | 109,762.30 | 100.00% | 16 | 20 | 21 | 0.23% | 23.20% | IGIFRQD<br>EDVTAK          | 3.03 | 1,491.78 |
| Control | 6006 | PREDICTED: ATPase, Ca++ transporting, cardiac muscle, slow twitch 2 isoform 1 | gi 7663901 | 109,762.30 | 100.00% | 16 | 20 | 21 | 0.23% | 23.20% | IRDEMV<br>ATEQER<br>TPLQQK | 2.42 | 2,188.10 |
| Control | 6006 | PREDICTED: ATPase, Ca++ transporting, cardiac muscle, slow twitch 2 isoform 1 | gi 7663901 | 109,762.30 | 100.00% | 16 | 20 | 21 | 0.23% | 23.20% | ISLPVIL<br>MDETLK          | 2.65 | 1,487.84 |
| Control | 6006 | PREDICTED: ATPase, Ca++ transporting, cardiac muscle, slow twitch 2 isoform 1 | gi 7663901 | 109,762.30 | 100.00% | 16 | 20 | 21 | 0.23% | 23.20% | KSEIGIA<br>MSGGTA<br>VAK   | 4.63 | 1,535.81 |
| Control | 6006 | PREDICTED: ATPase, Ca++ transporting, cardiac muscle, slow twitch 2 isoform 1 | gi 7663901 | 109,762.30 | 100.00% | 16 | 20 | 21 | 0.23% | 23.20% | MNVFDT<br>ELKGLS<br>K      | 2.95 | 1,497.76 |

|         |      |                                                                               |             |            |         |    |    |    |       |        |                                     |      |          |
|---------|------|-------------------------------------------------------------------------------|-------------|------------|---------|----|----|----|-------|--------|-------------------------------------|------|----------|
| Control | 6006 | PREDICTED: ATPase, Ca++ transporting, cardiac muscle, slow twitch 2 isoform 1 | gi 76639019 | 109,762.30 | 100.00% | 16 | 20 | 21 | 0.23% | 23.20% | NAENAIE<br>ALKEYE<br>PEMGK          | 3.19 | 2,051.96 |
| Control | 6006 | PREDICTED: ATPase, Ca++ transporting, cardiac muscle, slow twitch 2 isoform 1 | gi 76639019 | 109,762.30 | 100.00% | 16 | 20 | 21 | 0.23% | 23.20% | NMLFSG<br>TNIAAG<br>K               | 2.86 | 1,339.67 |
| Control | 6006 | PREDICTED: ATPase, Ca++ transporting, cardiac muscle, slow twitch 2 isoform 1 | gi 76639019 | 109,762.30 | 100.00% | 16 | 20 | 21 | 0.23% | 23.20% | SEIGIAM<br>GSGTAV<br>AK             | 5.27 | 1,407.72 |
| Control | 6006 | PREDICTED: ATPase, Ca++ transporting, cardiac muscle, slow twitch 2 isoform 1 | gi 76639019 | 109,762.30 | 100.00% | 16 | 20 | 21 | 0.23% | 23.20% | TASEMV<br>LADDNF<br>STIVAAY<br>EEGR | 2.91 | 2,441.15 |
| Control | 6006 | PREDICTED: ATPase, Ca++ transporting, cardiac muscle, slow twitch 2 isoform 1 | gi 76639019 | 109,762.30 | 100.00% | 16 | 20 | 21 | 0.23% | 23.20% | VDQSILT<br>GESVSVI<br>K             | 3.97 | 1,574.86 |
| Control | 6006 | PREDICTED: ATPase, Ca++ transporting, cardiac muscle, slow twitch 2 isoform 1 | gi 76639019 | 109,762.30 | 100.00% | 16 | 20 | 21 | 0.23% | 23.20% | VGSTKV<br>PMPGV<br>K                | 2.29 | 1,316.72 |

|         |      |                                                                                                                       |                                   |            |         |   |   |   |       |       |                                               |      |          |
|---------|------|-----------------------------------------------------------------------------------------------------------------------|-----------------------------------|------------|---------|---|---|---|-------|-------|-----------------------------------------------|------|----------|
| Control | 6006 | PREDIC TED: 97<br>similar to solute carrier family 7 (cationic amino acid transporter, y+ system), member 2 isoform 2 | gi 1946791                        | 71,681.50  | 99.80%  | 2 | 4 | 4 | 0.04% | 6.08% | HSLEGN<br>PRDEED<br>DDEDMY<br>SDNINA<br>ATEEK | 5.28 | 3,354.35 |
| Control | 6006 | PREDIC TED: 97<br>similar to solute carrier family 7 (cationic amino acid transporter, y+ system), member 2 isoform 2 | gi 1946791                        | 71,681.50  | 99.80%  | 2 | 4 | 4 | 0.04% | 6.08% | NLSLPFI<br>FHEK                               | 1.94 | 1,344.73 |
| Control | 6006 | ENDOD 1 protein                                                                                                       | gi 1544255<br>75,gi 15652<br>3150 | 54,851.30  | 100.00% | 3 | 3 | 3 | 0.03% | 7.20% | DREVIED<br>VMLRDL<br>EK                       | 1.92 | 1,875.95 |
| Control | 6006 | ENDOD 1 protein                                                                                                       | gi 1544255<br>75,gi 15652<br>3150 | 54,851.30  | 100.00% | 3 | 3 | 3 | 0.03% | 7.20% | ILEVVN<br>QVQDEE<br>R                         | 4.32 | 1,570.81 |
| Control | 6006 | ENDOD 1 protein                                                                                                       | gi 1544255<br>75,gi 15652<br>3150 | 54,851.30  | 100.00% | 3 | 3 | 3 | 0.03% | 7.20% | IPVYSAF<br>R                                  | 2.18 | 952.525  |
| Control | 6006 | PREDIC TED: 45<br>similar to hCG1980 844                                                                              | gi 1946749                        | 298,419.90 | 99.80%  | 2 | 2 | 2 | 0.02% | 0.87% | QLQPNE<br>EADYLG<br>VR                        | 3.54 | 1,631.80 |
| Control | 6006 | PREDIC TED: 45<br>similar to hCG1980 844                                                                              | gi 1946749                        | 298,419.90 | 99.80%  | 2 | 2 | 2 | 0.02% | 0.87% | YLLTQE<br>LLR                                 | 2.95 | 1,148.67 |
| Control | 6006 | PREDIC TED: 65<br>similar to coiled-coil domain containin g 109A                                                      | gi 1199185                        | 39,876.70  | 99.80%  | 2 | 2 | 2 | 0.02% | 6.27% | LRDPLQ<br>VHLPLR                              | 3.61 | 1,456.87 |
| Control | 6006 | PREDIC TED: 65<br>similar to coiled-coil domain containin g 109A                                                      | gi 1199185                        | 39,876.70  | 99.80%  | 2 | 2 | 2 | 0.02% | 6.27% | VAIYSPD<br>GVR                                | 2.31 | 1,076.57 |

|         |      |                                                                          |                                 |            |         |   |   |   |       |       |                            |      |          |
|---------|------|--------------------------------------------------------------------------|---------------------------------|------------|---------|---|---|---|-------|-------|----------------------------|------|----------|
| Control | 6006 | PREDICTED:<br>similar to ephrin receptor EphA2                           | gi 1198889<br>53                | 107,900.50 | 100.00% | 6 | 6 | 7 | 0.08% | 8.51% | EKDGEF<br>SVLQLV<br>GMLR   | 3.43 | 1,836.95 |
| Control | 6006 | PREDICTED:<br>similar to ephrin receptor EphA2                           | gi 1198889<br>53                | 107,900.50 | 100.00% | 6 | 6 | 7 | 0.08% | 8.51% | FADIVSI<br>LDK             | 2.92 | 1,120.63 |
| Control | 6006 | PREDICTED:<br>similar to ephrin receptor EphA2                           | gi 1198889<br>53                | 107,900.50 | 100.00% | 6 | 6 | 7 | 0.08% | 8.51% | IDTIAPD<br>EITGSSD<br>FEAR | 3.35 | 1,936.91 |
| Control | 6006 | PREDICTED:<br>similar to ephrin receptor EphA2                           | gi 1198889<br>53                | 107,900.50 | 100.00% | 6 | 6 | 7 | 0.08% | 8.51% | TYVDPH<br>TYEDPN<br>QAVLK  | 2.26 | 1,989.96 |
| Control | 6006 | PREDICTED:<br>similar to ephrin receptor EphA2                           | gi 1198889<br>53                | 107,900.50 | 100.00% | 6 | 6 | 7 | 0.08% | 8.51% | VIGAGEF<br>GEVYK           | 3.28 | 1,268.65 |
| Control | 6006 | PREDICTED:<br>similar to ephrin receptor EphA2                           | gi 1198889<br>53                | 107,900.50 | 100.00% | 6 | 6 | 7 | 0.08% | 8.51% | YSEPPLG<br>LTR             | 2.45 | 1,132.60 |
| Control | 6006 | Fascin homolog 1, actin-bundling protein (Strongylocentrotus purpuratus) | gi 7577358<br>7,gi 780454<br>91 | 54,768.00  | 100.00% | 3 | 3 | 3 | 0.03% | 7.71% | LINRPIIV<br>FR             | 2.42 | 1,240.79 |
| Control | 6006 | Fascin homolog 1, actin-bundling protein (Strongylocentrotus purpuratus) | gi 7577358<br>7,gi 780454<br>91 | 54,768.00  | 100.00% | 3 | 3 | 3 | 0.03% | 7.71% | LVAHPE<br>PATGYT<br>LEFR   | 3.91 | 1,800.93 |
| Control | 6006 | Fascin homolog 1, actin-bundling protein (Strongylocentrotus purpuratus) | gi 7577358<br>7,gi 780454<br>91 | 54,768.00  | 100.00% | 3 | 3 | 3 | 0.03% | 7.71% | YLAPSG<br>PSGTLK           | 2.48 | 1,190.64 |

|         |      |                                                    |                                                   |           |         |   |   |   |       |        |                                           |      |          |
|---------|------|----------------------------------------------------|---------------------------------------------------|-----------|---------|---|---|---|-------|--------|-------------------------------------------|------|----------|
| Control | 6006 | Progesterone receptor membrane component 1         | gi 109659385,gi 115495221,gi 116248575,gi 7689365 | 21,605.30 | 100.00% | 3 | 3 | 4 | 0.04% | 19.10% | FYGPEG<br>PYGVFA<br>GR                    | 3.82 | 1,516.72 |
| Control | 6006 | Progesterone receptor membrane component 1         | gi 109659385,gi 115495221,gi 116248575,gi 7689365 | 21,605.30 | 100.00% | 3 | 3 | 4 | 0.04% | 19.10% | IVRGDQ<br>PAASDS<br>DDDEPP<br>PLPR        | 4.86 | 2,347.12 |
| Control | 6006 | Progesterone receptor membrane component 1         | gi 109659385,gi 115495221,gi 116248575,gi 7689365 | 21,605.30 | 100.00% | 3 | 3 | 4 | 0.04% | 19.10% | KFYGPE<br>GPYGVF<br>AGR                   | 3.55 | 1,644.82 |
| Control | 6006 | PTPN1 protein                                      | gi 151556032,gi 154152077                         | 49,019.80 | 99.80%  | 2 | 2 | 2 | 0.02% | 5.18%  | FSYLAVI<br>EGAK                           | 3.45 | 1,197.65 |
| Control | 6006 | PTPN1 protein                                      | gi 151556032,gi 154152077                         | 49,019.80 | 99.80%  | 2 | 2 | 2 | 0.02% | 5.18%  | YRDVSP<br>FDHSR                           | 3.38 | 1,378.65 |
| Control | 6006 | similar to ribosomal protein L27                   | gi 28189717,gi 47117099,gi 74268027,gi 77404275   | 15,780.40 | 99.80%  | 2 | 2 | 2 | 0.02% | 14.70% | VYNYNH<br>LMPTR                           | 1.5  | 1,423.68 |
| Control | 6006 | similar to ribosomal protein L27                   | gi 28189717,gi 47117099,gi 74268027,gi 77404275   | 15,780.40 | 99.80%  | 2 | 2 | 2 | 0.02% | 14.70% | YSVDIPL<br>DK                             | 2.52 | 1,049.55 |
| Control | 6006 | PREDICTED: heat shock 60kDa protein 1 (chaperonin) | gi 2818988228                                     | 75,015.00 | 100.00% | 6 | 7 | 7 | 0.08% | 13.40% | ISSVQSI<br>VPALEIA<br>NAHR                | 3.26 | 1,905.06 |
| Control | 6006 | PREDICTED: heat shock 60kDa protein 1 (chaperonin) | gi 119888228                                      | 75,015.00 | 100.00% | 6 | 7 | 7 | 0.08% | 13.40% | LVQDVA<br>NNTNEE<br>AGDGTT<br>TATVLA<br>R | 4.5  | 2,560.25 |
| Control | 6006 | PREDICTED: heat shock 60kDa protein 1 (chaperonin) | gi 119888228                                      | 75,015.00 | 100.00% | 6 | 7 | 7 | 0.08% | 13.40% | TLKIPA<br>MTIAK                           | 2.23 | 1,202.72 |
| Control | 6006 | PREDICTED: heat shock 60kDa protein 1 (chaperonin) | gi 119888228                                      | 75,015.00 | 100.00% | 6 | 7 | 7 | 0.08% | 13.40% | TLNDEL<br>EIIEGMK<br>FDR                  | 2.24 | 1,938.95 |

|         |      |                                                                |                                                |            |         |   |    |    |       |        |                                             |      |          |
|---------|------|----------------------------------------------------------------|------------------------------------------------|------------|---------|---|----|----|-------|--------|---------------------------------------------|------|----------|
| Control | 6006 | PREDICTED:<br>heat shock<br>60kDa<br>protein 1<br>(chaperonin) | gi 119888228                                   | 75,015.00  | 100.00% | 6 | 7  | 7  | 0.08% | 13.40% | VGEVIV<br>TKDDAM<br>LLK                     | 3.07 | 1,646.90 |
| Control | 6006 | PREDICTED:<br>heat shock<br>60kDa<br>protein 1<br>(chaperonin) | gi 119888228                                   | 75,015.00  | 100.00% | 6 | 7  | 7  | 0.08% | 13.40% | VGLQVV<br>AVK                               | 2.34 | 912.5877 |
| Control | 6006 | CYB5R3<br>protein                                              | gi 148877441,gi 157151718,gi 162941,gi 1709233 | 33,973.70  | 100.00% | 8 | 15 | 21 | 0.23% | 36.70% | GPNGLL<br>VYQGK                             | 4    | 1,145.63 |
| Control | 6006 | CYB5R3<br>protein                                              | gi 148877441,gi 157151718,gi 162941,gi 1709233 | 33,973.70  | 100.00% | 8 | 15 | 21 | 0.23% | 36.70% | IDGNLVI<br>RPYTPV<br>SSDDDK<br>GFVDLVI<br>K | 4.94 | 2,975.57 |
| Control | 6006 | CYB5R3<br>protein                                              | gi 148877441,gi 157151718,gi 162941,gi 1709233 | 33,973.70  | 100.00% | 8 | 15 | 21 | 0.23% | 36.70% | IGDTIEF<br>R                                | 2.64 | 950.4943 |
| Control | 6006 | CYB5R3<br>protein                                              | gi 148877441,gi 157151718,gi 162941,gi 1709233 | 33,973.70  | 100.00% | 8 | 15 | 21 | 0.23% | 36.70% | LIDKEVI<br>SHDTR                            | 2.8  | 1,425.77 |
| Control | 6006 | CYB5R3<br>protein                                              | gi 148877441,gi 157151718,gi 162941,gi 1709233 | 33,973.70  | 100.00% | 8 | 15 | 21 | 0.23% | 36.70% | LIDKEVI<br>SHDTRR                           | 3.26 | 1,581.87 |
| Control | 6006 | CYB5R3<br>protein                                              | gi 148877441,gi 157151718,gi 162941,gi 1709233 | 33,973.70  | 100.00% | 8 | 15 | 21 | 0.23% | 36.70% | STPAITL<br>ENPDIKY<br>PLR                   | 2.57 | 1,928.05 |
| Control | 6006 | CYB5R3<br>protein                                              | gi 148877441,gi 157151718,gi 162941,gi 1709233 | 33,973.70  | 100.00% | 8 | 15 | 21 | 0.23% | 36.70% | SVGMI<br>GGTGITP<br>MLQVIR                  | 4.06 | 1,917.03 |
| Control | 6006 | CYB5R3<br>protein                                              | gi 148877441,gi 157151718,gi 162941,gi 1709233 | 33,973.70  | 100.00% | 8 | 15 | 21 | 0.23% | 36.70% | VYFKDT<br>HPKFPA<br>GGK                     | 2.5  | 1,691.89 |
| Control | 6006 | endothelial cell<br>adhesion<br>molecule                       | gi 118151218,gi 119919027,gi 86823868          | 41,779.80  | 99.80%  | 2 | 2  | 2  | 0.02% | 8.84%  | ALEEPA<br>NDIKED<br>AIAPR                   | 2.57 | 1,851.94 |
| Control | 6006 | endothelial cell<br>adhesion<br>molecule                       | gi 118151218,gi 119919027,gi 86823868          | 41,779.80  | 99.80%  | 2 | 2  | 2  | 0.02% | 8.84%  | GSDTISK<br>NGTLSS<br>VTSAR                  | 3.04 | 1,780.90 |
| Control | 6006 | PREDICTED:<br>heparan<br>sulfate<br>proteoglycan 2             | gi 119888979                                   | 467,987.40 | 99.80%  | 2 | 2  | 2  | 0.02% | 0.98%  | GTLEPV<br>QRPDVV<br>LVGAGH<br>R             | 4.07 | 2,000.10 |



|         |      |                                            |                                        |            |         |   |    |    |       |        |                                                     |          |
|---------|------|--------------------------------------------|----------------------------------------|------------|---------|---|----|----|-------|--------|-----------------------------------------------------|----------|
| Control | 6006 | PREDIC TED: heparan sulfate proteoglycan 2 | gi 119888979                           | 467,987.40 | 99.80%  | 2 | 2  | 2  | 0.02% | 0.98%  | LRSPVISI 4.44<br>DPPSSTV<br>QQGQDA<br>SFK           | 2,557.33 |
| Control | 6006 | PREDIC TED: keratin 19 isoform 8           | gi 194676168                           | 51,863.50  | 100.00% | 9 | 12 | 16 | 0.17% | 23.10% | ALEEAN 2.45<br>ADLEVK                               | 1,301.66 |
| Control | 6006 | PREDIC TED: keratin 19 isoform 8           | gi 194676168                           | 51,863.50  | 100.00% | 9 | 12 | 16 | 0.17% | 23.10% | ASLENSL 3.27<br>EETKGR                              | 1,433.72 |
| Control | 6006 | PREDIC TED: keratin 19 isoform 8           | gi 194676168                           | 51,863.50  | 100.00% | 9 | 12 | 16 | 0.17% | 23.10% | LASYLD 3.24<br>KVR                                  | 1,064.61 |
| Control | 6006 | PREDIC TED: keratin 19 isoform 8           | gi 194676168                           | 51,863.50  | 100.00% | 9 | 12 | 16 | 0.17% | 23.10% | LLEGED 3.81<br>AHLSSS<br>QFSSGS<br>QSSR             | 2,309.06 |
| Control | 6006 | PREDIC TED: keratin 19 isoform 8           | gi 194676168                           | 51,863.50  | 100.00% | 9 | 12 | 16 | 0.17% | 23.10% | QRPAEIK 3.31<br>DYSPYF<br>K                         | 1,741.89 |
| Control | 6006 | PREDIC TED: keratin 19 isoform 8           | gi 194676168                           | 51,863.50  | 100.00% | 9 | 12 | 16 | 0.17% | 23.10% | TEELNR 5.6<br>EVATNS<br>ELVQSG<br>K                 | 2,104.05 |
| Control | 6006 | PREDIC TED: keratin 19 isoform 8           | gi 194676168                           | 51,863.50  | 100.00% | 9 | 12 | 16 | 0.17% | 23.10% | TRLEQEI 3.56<br>ATYR                                | 1,379.73 |
| Control | 6006 | PREDIC TED: keratin 19 isoform 8           | gi 194676168                           | 51,863.50  | 100.00% | 9 | 12 | 16 | 0.17% | 23.10% | TRLEQEI 3.71<br>ATYRR                               | 1,535.83 |
| Control | 6006 | PREDIC TED: keratin 19 isoform 8           | gi 194676168                           | 51,863.50  | 100.00% | 9 | 12 | 16 | 0.17% | 23.10% | VLDELTA 4.52<br>LAR                                 | 1,029.59 |
| Control | 6006 | Transmembrane protein 49                   | gi 111307060,gi 115496266,gi 122133514 | 46,165.40  | 99.80%  | 2 | 2  | 3  | 0.03% | 12.60% | LSGAEP 5.08<br>DDEEYQ<br>EFEEML<br>EHAETA<br>QDFASR | 3,489.46 |
| Control | 6006 | Transmembrane protein 49                   | gi 111307060,gi 115496266,gi 122133514 | 46,165.40  | 99.80%  | 2 | 2  | 3  | 0.03% | 12.60% | VAMNKE 5.36<br>QYNGNF<br>TDPSSV<br>NEK              | 2,388.08 |
| Control | 6006 | KRT5 protein                               | gi 146186887,gi 56710317               | 62,920.60  | 100.00% | 5 | 6  | 8  | 0.09% | 9.65%  | FASFIDK 1.63<br>VR                                  | 1,082.60 |
| Control | 6006 | KRT5 protein                               | gi 146186887,gi 56710317               | 62,920.60  | 100.00% | 5 | 6  | 8  | 0.09% | 9.65%  | NKYEDE 2.51<br>INKR                                 | 1,308.65 |
| Control | 6006 | KRT5 protein                               | gi 146186887,gi 56710317               | 62,920.60  | 100.00% | 5 | 6  | 8  | 0.09% | 9.65%  | SLDLDSII 3.05<br>AEVK                               | 1,302.72 |

|         |      |                                        |                                                 |            |         |   |   |   |       |        |                                                      |          |
|---------|------|----------------------------------------|-------------------------------------------------|------------|---------|---|---|---|-------|--------|------------------------------------------------------|----------|
| Control | 6006 | KRT5 protein                           | gi 146186887,gi 56710317                        | 62,920.60  | 100.00% | 5 | 6 | 8 | 0.09% | 9.65%  | SRTEAES 2.49<br>WYQTK<br>YEELQQ<br>TAGR              | 2,661.25 |
| Control | 6006 | KRT5 protein                           | gi 146186887,gi 56710317                        | 62,920.60  | 100.00% | 5 | 6 | 8 | 0.09% | 9.65%  | TLNNKF 2.14<br>ASFIDKV<br>R                          | 1,652.91 |
| Control | 6006 | PREDICTED: similar to CG2943-CG2943-PA | gi 119888913                                    | 115,925.80 | 100.00% | 6 | 6 | 7 | 0.08% | 11.40% | ALVQTE 3.66<br>DHLLLFL<br>QQLAGR                     | 2,165.21 |
| Control | 6006 | PREDICTED: similar to CG2943-CG2943-PA | gi 119888913                                    | 115,925.80 | 100.00% | 6 | 6 | 7 | 0.08% | 11.40% | AQFFLQ 3.43<br>LSPSHY<br>ALLHYR                      | 2,191.14 |
| Control | 6006 | PREDICTED: similar to CG2943-CG2943-PA | gi 119888913                                    | 115,925.80 | 100.00% | 6 | 6 | 7 | 0.08% | 11.40% | HLLVGL 3.94<br>PSGAILS<br>LPK                        | 1,614.99 |
| Control | 6006 | PREDICTED: similar to CG2943-CG2943-PA | gi 119888913                                    | 115,925.80 | 100.00% | 6 | 6 | 7 | 0.08% | 11.40% | QLHELA 3.41<br>PSIFFYL<br>VDADQG<br>R                | 2,319.18 |
| Control | 6006 | PREDICTED: similar to CG2943-CG2943-PA | gi 119888913                                    | 115,925.80 | 100.00% | 6 | 6 | 7 | 0.08% | 11.40% | RPEIPTE 3.29<br>QSREEN<br>LIPYSPD<br>VQIHAE<br>R     | 3,203.61 |
| Control | 6006 | PREDICTED: similar to CG2943-CG2943-PA | gi 119888913                                    | 115,925.80 | 100.00% | 6 | 6 | 7 | 0.08% | 11.40% | RPVLQS 3.23<br>LLLPIMD<br>QDYAK                      | 2,116.15 |
| Control | 6006 | A2M protein                            | gi 157743038,gi 157954061                       | 167,557.60 | 99.80%  | 2 | 2 | 2 | 0.02% | 2.98%  | ASFSVL 3.28<br>GDILGSA<br>MR                         | 1,523.79 |
| Control | 6006 | A2M protein                            | gi 157743038,gi 157954061                       | 167,557.60 | 99.80%  | 2 | 2 | 2 | 0.02% | 2.98%  | GGVDDE 4.02<br>VTL SAYI<br>TIALLEM<br>PLPVTHP<br>VVR | 3,205.72 |
| Control | 6006 | chloride intracellular channel 1       | gi 59858371,gi 62751970,gi 74268283,gi 75040226 | 26,974.50  | 100.00% | 3 | 3 | 3 | 0.03% | 23.70% | GVTFNV 3.02<br>TTVDTK                                | 1,281.67 |
| Control | 6006 | chloride intracellular channel 1       | gi 59858371,gi 62751970,gi 74268283,gi 75040226 | 26,974.50  | 100.00% | 3 | 3 | 3 | 0.03% | 23.70% | LAALNP 3.79<br>ESNTAG<br>LDIFAK                      | 1,844.98 |
| Control | 6006 | chloride intracellular channel 1       | gi 59858371,gi 62751970,gi 74268283,gi 75040226 | 26,974.50  | 100.00% | 3 | 3 | 3 | 0.03% | 23.70% | VLDNYL 3.98<br>TSPLPDE<br>VDE TSA<br>EDEGISQ<br>R    | 2,992.39 |
| Control | 6006 | SFXN3 protein                          | gi 151554123,gi 156120541,gi 206558262          | 35,690.00  | 100.00% | 4 | 4 | 4 | 0.04% | 14.60% | AQIQEQ 2.86<br>NPSIEVV<br>YYNK                       | 2,023.01 |

|         |      |                                             |                                        |           |         |    |    |    |       |        |                                         |          |
|---------|------|---------------------------------------------|----------------------------------------|-----------|---------|----|----|----|-------|--------|-----------------------------------------|----------|
| Control | 6006 | SFXN3 protein                               | gi 151554123,gi 156120541,gi 206558262 | 35,690.00 | 100.00% | 4  | 4  | 4  | 0.04% | 14.60% | ELQVGIP 2.84<br>VTNEQG<br>QR            | 1,667.87 |
| Control | 6006 | SFXN3 protein                               | gi 151554123,gi 156120541,gi 206558262 | 35,690.00 | 100.00% | 4  | 4  | 4  | 0.04% | 14.60% | NLLLSG 4.27<br>AQLEAS<br>R              | 1,371.76 |
| Control | 6006 | SFXN3 protein                               | gi 151554123,gi 156120541,gi 206558262 | 35,690.00 | 100.00% | 4  | 4  | 4  | 0.04% | 14.60% | QRELQV 1.95<br>GIPVTNE<br>QGQR          | 1,952.03 |
| Control | 6006 | 2',5'-oligoadenylate synthetase 1, 40/46kDa | gi 158454990,gi 37953332,gi 94967004   | 45,118.40 | 100.00% | 2  | 3  | 4  | 0.04% | 11.10% | LNQAVE 4.05<br>FDVLP<br>FDALGQ<br>LTK   | 2,289.21 |
| Control | 6006 | 2',5'-oligoadenylate synthetase 1, 40/46kDa | gi 158454990,gi 37953332,gi 94967004   | 45,118.40 | 100.00% | 2  | 3  | 4  | 0.04% | 11.10% | QLAKPR 3.77<br>PVILDPA<br>DPTGNV<br>AGK | 2,257.27 |
| Control | 6006 | RecName : Full=GT P-binding protein SAR1a   | gi 115311863,gi 74354052,gi 77735989   | 22,391.90 | 99.80%  | 2  | 2  | 2  | 0.02% | 16.70% | LVFLGL 2.95<br>DNAGK                    | 1,146.65 |
| Control | 6006 | RecName : Full=GT P-binding protein SAR1a   | gi 115311863,gi 74354052,gi 77735989   | 22,391.90 | 99.80%  | 2  | 2  | 2  | 0.02% | 16.70% | TDAISEE 2.99<br>KLREIFG<br>LYGQTT<br>GK | 2,456.27 |
| Control | 6006 | Actin, gamma 1                              | gi 151554360,gi 74354242,gi 75812932   | 41,775.90 | 100.00% | 15 | 23 | 48 | 0.52% | 42.70% | AVFPSIV 3.21<br>GRPR                    | 1,198.71 |
| Control | 6006 | Actin, gamma 1                              | gi 151554360,gi 74354242,gi 75812932   | 41,775.90 | 100.00% | 15 | 23 | 48 | 0.52% | 42.70% | DLTDYL 1.83<br>MK                       | 1,014.48 |
| Control | 6006 | Actin, gamma 1                              | gi 151554360,gi 74354242,gi 75812932   | 41,775.90 | 100.00% | 15 | 23 | 48 | 0.52% | 42.70% | DLYANT 4.35<br>VLSGGT<br>TMYPGI<br>ADR  | 2,231.07 |
| Control | 6006 | Actin, gamma 1                              | gi 151554360,gi 74354242,gi 75812932   | 41,775.90 | 100.00% | 15 | 23 | 48 | 0.52% | 42.70% | EITALAP 2.93<br>STMK                    | 1,161.62 |
| Control | 6006 | Actin, gamma 1                              | gi 151554360,gi 74354242,gi 75812932   | 41,775.90 | 100.00% | 15 | 23 | 48 | 0.52% | 42.70% | GYSFTT 2.75<br>TAER                     | 1,132.53 |
| Control | 6006 | Actin, gamma 1                              | gi 151554360,gi 74354242,gi 75812932   | 41,775.90 | 100.00% | 15 | 23 | 48 | 0.52% | 42.70% | GYSFTT 2.92<br>TAEREIV<br>R             | 1,629.82 |
| Control | 6006 | Actin, gamma 1                              | gi 151554360,gi 74354242,gi 75812932   | 41,775.90 | 100.00% | 15 | 23 | 48 | 0.52% | 42.70% | IKIAPPE 2.6<br>R                        | 1,036.65 |

|         |      |                |                                      |           |         |    |    |    |       |        |                                    |      |          |
|---------|------|----------------|--------------------------------------|-----------|---------|----|----|----|-------|--------|------------------------------------|------|----------|
| Control | 6006 | Actin, gamma 1 | gi 151554360,gi 74354242,gi 75812932 | 41,775.90 | 100.00% | 15 | 23 | 48 | 0.52% | 42.70% | IKIIAPPE RK                        | 2.61 | 1,164.75 |
| Control | 6006 | Actin, gamma 1 | gi 151554360,gi 74354242,gi 75812932 | 41,775.90 | 100.00% | 15 | 23 | 48 | 0.52% | 42.70% | KDLYAN TVLSGG TTMYPG IADR          | 6.1  | 2,359.16 |
| Control | 6006 | Actin, gamma 1 | gi 151554360,gi 74354242,gi 75812932 | 41,775.90 | 100.00% | 15 | 23 | 48 | 0.52% | 42.70% | LDLAGR DLTDYL MK                   | 3.38 | 1,639.84 |
| Control | 6006 | Actin, gamma 1 | gi 151554360,gi 74354242,gi 75812932 | 41,775.90 | 100.00% | 15 | 23 | 48 | 0.52% | 42.70% | QEYDES GPSIVHR                     | 1.87 | 1,516.70 |
| Control | 6006 | Actin, gamma 1 | gi 151554360,gi 74354242,gi 75812932 | 41,775.90 | 100.00% | 15 | 23 | 48 | 0.52% | 42.70% | QEYDES GPSIVHR K                   | 2.61 | 1,644.80 |
| Control | 6006 | Actin, gamma 1 | gi 151554360,gi 74354242,gi 75812932 | 41,775.90 | 100.00% | 15 | 23 | 48 | 0.52% | 42.70% | SYELPD GQVITIG NER                 | 4.74 | 1,790.89 |
| Control | 6006 | Actin, gamma 1 | gi 151554360,gi 74354242,gi 75812932 | 41,775.90 | 100.00% | 15 | 23 | 48 | 0.52% | 42.70% | TTGIVM DSGDGV THTVPIY EGYALP HAILR | 6.26 | 3,199.61 |
| Control | 6006 | Actin, gamma 1 | gi 151554360,gi 74354242,gi 75812932 | 41,775.90 | 100.00% | 15 | 23 | 48 | 0.52% | 42.70% | VAPEEH PVLTE APLNPK                | 4.81 | 1,954.06 |
| Control | 6006 | PDIA3 protein  | gi 146186933,gi 148230374            | 56,913.80 | 100.00% | 15 | 18 | 19 | 0.21% | 33.70% | EATNPP VIQEEKP K                   | 2.52 | 1,579.83 |
| Control | 6006 | PDIA3 protein  | gi 146186933,gi 148230374            | 56,913.80 | 100.00% | 15 | 18 | 19 | 0.21% | 33.70% | ELSDFIS YLK                        | 2.17 | 1,214.63 |
| Control | 6006 | PDIA3 protein  | gi 146186933,gi 148230374            | 56,913.80 | 100.00% | 15 | 18 | 19 | 0.21% | 33.70% | FLEDYF DGNLKR                      | 3.47 | 1,516.74 |
| Control | 6006 | PDIA3 protein  | gi 146186933,gi 148230374            | 56,913.80 | 100.00% | 15 | 18 | 19 | 0.21% | 33.70% | FVMQEE FSR                         | 2.72 | 1,188.54 |
| Control | 6006 | PDIA3 protein  | gi 146186933,gi 148230374            | 56,913.80 | 100.00% | 15 | 18 | 19 | 0.21% | 33.70% | FVMQEE FSRDGK                      | 2.46 | 1,488.68 |
| Control | 6006 | PDIA3 protein  | gi 146186933,gi 148230374            | 56,913.80 | 100.00% | 15 | 18 | 19 | 0.21% | 33.70% | GFPTIYF SPANK                      | 2.8  | 1,341.68 |
| Control | 6006 | PDIA3 protein  | gi 146186933,gi 148230374            | 56,913.80 | 100.00% | 15 | 18 | 19 | 0.21% | 33.70% | IFRDGEE SGAYDG PR                  | 5.47 | 1,668.76 |
| Control | 6006 | PDIA3 protein  | gi 146186933,gi 148230374            | 56,913.80 | 100.00% | 15 | 18 | 19 | 0.21% | 33.70% | KLHFAV ASR                         | 3.02 | 1,028.60 |
| Control | 6006 | PDIA3 protein  | gi 146186933,gi 148230374            | 56,913.80 | 100.00% | 15 | 18 | 19 | 0.21% | 33.70% | KTFSHEL SDFGLES TTGEIPV VAVR       | 4.38 | 2,719.39 |
| Control | 6006 | PDIA3 protein  | gi 146186933,gi 148230374            | 56,913.80 | 100.00% | 15 | 18 | 19 | 0.21% | 33.70% | LRKDPNI VIAK                       | 3.41 | 1,266.79 |
| Control | 6006 | PDIA3 protein  | gi 146186933,gi 148230374            | 56,913.80 | 100.00% | 15 | 18 | 19 | 0.21% | 33.70% | MDATAN DVPSPY EVR                  | 3.88 | 1,680.75 |

|         |      |                                               |                                      |           |         |    |    |    |       |        |                                           |          |
|---------|------|-----------------------------------------------|--------------------------------------|-----------|---------|----|----|----|-------|--------|-------------------------------------------|----------|
| Control | 6006 | PDIA3 protein                                 | gi 146186933,gi 148230374            | 56,913.80 | 100.00% | 15 | 18 | 19 | 0.21% | 33.70% | SEPIPES 2.12<br>NDGPVK                    | 1,368.66 |
| Control | 6006 | PDIA3 protein                                 | gi 146186933,gi 148230374            | 56,913.80 | 100.00% | 15 | 18 | 19 | 0.21% | 33.70% | TFSHEL3 3.58<br>DFGLEST<br>TGEIPVV<br>AVR | 2,591.30 |
| Control | 6006 | PDIA3 protein                                 | gi 146186933,gi 148230374            | 56,913.80 | 100.00% | 15 | 18 | 19 | 0.21% | 33.70% | VDCTAN 2.77<br>TNTCNK<br>YGVSGY<br>PTLK   | 2,349.09 |
| Control | 6006 | PDIA3 protein                                 | gi 146186933,gi 148230374            | 56,913.80 | 100.00% | 15 | 18 | 19 | 0.21% | 33.70% | YGVSGY 2.27<br>PTLK                       | 1,084.57 |
| Control | 6006 | GPR56 protein                                 | gi 134024611,gi 139949073            | 76,936.90 | 99.80%  | 2  | 2  | 2  | 0.02% | 3.35%  | LPISSGS 3.65<br>TSSSRI                    | 1,291.69 |
| Control | 6006 | GPR56 protein                                 | gi 134024611,gi 139949073            | 76,936.90 | 99.80%  | 2  | 2  | 2  | 0.02% | 3.35%  | VLGIVV 2.7<br>QNTK                        | 1,070.66 |
| Control | 6006 | PREDICTED: similar to Cyclin-Y-like protein 1 | gi 76610508                          | 41,110.50 | 99.80%  | 2  | 2  | 2  | 0.02% | 6.89%  | SLADDN 2.6<br>NLNFLF<br>APLSK             | 1,878.96 |
| Control | 6006 | PREDICTED: similar to Cyclin-Y-like protein 1 | gi 76610508                          | 41,110.50 | 99.80%  | 2  | 2  | 2  | 0.02% | 6.89%  | SLDIFDE 2.27<br>R                         | 994.4841 |
| Control | 6006 | PECAM1 protein 31                             | gi 111308531                         | 82,597.50 | 100.00% | 6  | 11 | 16 | 0.17% | 8.81%  | APVHFTI 2.94<br>EK                        | 1,041.57 |
| Control | 6006 | PECAM1 protein 31                             | gi 111308531                         | 82,597.50 | 100.00% | 6  | 11 | 16 | 0.17% | 8.81%  | APVHFTI 3<br>EKFELNI<br>R                 | 1,814.00 |
| Control | 6006 | PECAM1 protein 31                             | gi 111308531                         | 82,597.50 | 100.00% | 6  | 11 | 16 | 0.17% | 8.81%  | FHIPEG 2.66<br>K                          | 940.5252 |
| Control | 6006 | PECAM1 protein 31                             | gi 111308531                         | 82,597.50 | 100.00% | 6  | 11 | 16 | 0.17% | 8.81%  | GTETVY 2.91<br>SEIR                       | 1,154.57 |
| Control | 6006 | PECAM1 protein 31                             | gi 111308531                         | 82,597.50 | 100.00% | 6  | 11 | 16 | 0.17% | 8.81%  | QMPVE 3.26<br>MSRPV<br>PLLNSN<br>NEK      | 2,270.13 |
| Control | 6006 | PECAM1 protein 31                             | gi 111308531                         | 82,597.50 | 100.00% | 6  | 11 | 16 | 0.17% | 8.81%  | RNTESY 3.1<br>LIPHVR                      | 1,484.80 |
| Control | 6006 | RecName : Full=40S ribosomal protein S16      | gi 108860953,gi 74354274,gi 75812950 | 16,427.90 | 100.00% | 3  | 3  | 3  | 0.03% | 15.80% | EIKDILIQ 3.05<br>YDR                      | 1,405.77 |
| Control | 6006 | RecName : Full=40S ribosomal protein S16      | gi 108860953,gi 74354274,gi 75812950 | 16,427.90 | 100.00% | 3  | 3  | 3  | 0.03% | 15.80% | LLEPVLL 2.21<br>LGK                       | 1,094.72 |
| Control | 6006 | RecName : Full=40S ribosomal protein S16      | gi 108860953,gi 74354274,gi 75812950 | 16,427.90 | 100.00% | 3  | 3  | 3  | 0.03% | 15.80% | LLEPVLL 2.13<br>LGKER                     | 1,379.86 |
| Control | 6006 | vimentin 70                                   | gi 110347570                         | 53,710.80 | 100.00% | 25 | 38 | 52 | 0.57% | 55.60% | DGQVIN 2.54<br>ETSQHH<br>DDLE             | 1,836.80 |

|         |      |          |                  |           |         |    |    |    |       |        |                                                             |          |
|---------|------|----------|------------------|-----------|---------|----|----|----|-------|--------|-------------------------------------------------------------|----------|
| Control | 6006 | vimentin | gi 1103475<br>70 | 53,710.80 | 100.00% | 25 | 38 | 52 | 0.57% | 55.60% | EAEESTL 3.4<br>QSFRRQ<br>VDNASL<br>AR                       | 2,366.12 |
| Control | 6006 | vimentin | gi 1103475<br>70 | 53,710.80 | 100.00% | 25 | 38 | 52 | 0.57% | 55.60% | EMEENF 3.2<br>SVEAAN<br>YQDTIG<br>R                         | 2,218.96 |
| Control | 6006 | vimentin | gi 1103475<br>70 | 53,710.80 | 100.00% | 25 | 38 | 52 | 0.57% | 55.60% | ETNLDS 3.18<br>LPLVDT<br>HSK                                | 1,668.84 |
| Control | 6006 | vimentin | gi 1103475<br>70 | 53,710.80 | 100.00% | 25 | 38 | 52 | 0.57% | 55.60% | ETNLDS 2.96<br>LPLVDT<br>HSKR                               | 1,824.95 |
| Control | 6006 | vimentin | gi 1103475<br>70 | 53,710.80 | 100.00% | 25 | 38 | 52 | 0.57% | 55.60% | EYQDLL 2.07<br>NVK                                          | 1,121.58 |
| Control | 6006 | vimentin | gi 1103475<br>70 | 53,710.80 | 100.00% | 25 | 38 | 52 | 0.57% | 55.60% | FADLSE 4.14<br>AANR                                         | 1,093.53 |
| Control | 6006 | vimentin | gi 1103475<br>70 | 53,710.80 | 100.00% | 25 | 38 | 52 | 0.57% | 55.60% | FADLSE 2.92<br>AANRNN<br>DALR                               | 1,776.86 |
| Control | 6006 | vimentin | gi 1103475<br>70 | 53,710.80 | 100.00% | 25 | 38 | 52 | 0.57% | 55.60% | FANYID 2.97<br>KVR                                          | 1,125.61 |
| Control | 6006 | vimentin | gi 1103475<br>70 | 53,710.80 | 100.00% | 25 | 38 | 52 | 0.57% | 55.60% | HLREYQ 4.6<br>DLLNVK                                        | 1,527.83 |
| Control | 6006 | vimentin | gi 1103475<br>70 | 53,710.80 | 100.00% | 25 | 38 | 52 | 0.57% | 55.60% | ILLAELE 3.48<br>QLK                                         | 1,169.71 |
| Control | 6006 | vimentin | gi 1103475<br>70 | 53,710.80 | 100.00% | 25 | 38 | 52 | 0.57% | 55.60% | ILLAELE 4.43<br>QLKGQG<br>K                                 | 1,539.91 |
| Control | 6006 | vimentin | gi 1103475<br>70 | 53,710.80 | 100.00% | 25 | 38 | 52 | 0.57% | 55.60% | ISLPLPN 3.21<br>FSSLNLR                                     | 1,570.90 |
| Control | 6006 | vimentin | gi 1103475<br>70 | 53,710.80 | 100.00% | 25 | 38 | 52 | 0.57% | 55.60% | ISLPLPN 3.48<br>FSSLNLR<br>ETNLDS<br>LPLVDT<br>HSKR         | 3,376.82 |
| Control | 6006 | vimentin | gi 1103475<br>70 | 53,710.80 | 100.00% | 25 | 38 | 52 | 0.57% | 55.60% | KLHDEEI 4.55<br>QELQAQI<br>EQHVQ<br>IDMDVS<br>KPDLT<br>ALR  | 4,085.06 |
| Control | 6006 | vimentin | gi 1103475<br>70 | 53,710.80 | 100.00% | 25 | 38 | 52 | 0.57% | 55.60% | KVESLQ 5.02<br>EEIAFLK                                      | 1,533.85 |
| Control | 6006 | vimentin | gi 1103475<br>70 | 53,710.80 | 100.00% | 25 | 38 | 52 | 0.57% | 55.60% | KVESLQ 4.4<br>EEIAFLK<br>K                                  | 1,661.95 |
| Control | 6006 | vimentin | gi 1103475<br>70 | 53,710.80 | 100.00% | 25 | 38 | 52 | 0.57% | 55.60% | LHDEEIQ 4.55<br>ELQAQIQ<br>EQHVQI<br>DMDVSK<br>PDLTAA<br>LR | 3,956.97 |
| Control | 6006 | vimentin | gi 1103475<br>70 | 53,710.80 | 100.00% | 25 | 38 | 52 | 0.57% | 55.60% | LQDEIQ 2.59<br>NMKEE<br>MAR                                 | 1,750.81 |
| Control | 6006 | vimentin | gi 1103475<br>70 | 53,710.80 | 100.00% | 25 | 38 | 52 | 0.57% | 55.60% | LQEEML 5.04<br>QREEAE<br>STLQSF                             | 2,340.11 |
| Control | 6006 | vimentin | gi 1103475<br>70 | 53,710.80 | 100.00% | 25 | 38 | 52 | 0.57% | 55.60% | LQEEML 4.05<br>QREEAE<br>STLQSF<br>QVDNA<br>SLAR            | 3,409.63 |

|         |      |                                                                                                                           |                                                                  |           |         |    |    |    |       |        |                                                   |          |
|---------|------|---------------------------------------------------------------------------------------------------------------------------|------------------------------------------------------------------|-----------|---------|----|----|----|-------|--------|---------------------------------------------------|----------|
| Control | 6006 | vimentin                                                                                                                  | gi 1103475<br>70                                                 | 53,710.80 | 100.00% | 25 | 38 | 52 | 0.57% | 55.60% | MALDIEI 3.82<br>ATYR                              | 1,311.66 |
| Control | 6006 | vimentin                                                                                                                  | gi 1103475<br>70                                                 | 53,710.80 | 100.00% | 25 | 38 | 52 | 0.57% | 55.60% | TLYTSSP 4.43<br>GGVYAT<br>R                       | 1,472.74 |
| Control | 6006 | vimentin                                                                                                                  | gi 1103475<br>70                                                 | 53,710.80 | 100.00% | 25 | 38 | 52 | 0.57% | 55.60% | TNEKVE 4.13<br>LQELND<br>R                        | 1,587.80 |
| Control | 6006 | vimentin                                                                                                                  | gi 1103475<br>70                                                 | 53,710.80 | 100.00% | 25 | 38 | 52 | 0.57% | 55.60% | VEVERD 4.22<br>NLAEDI<br>MR                       | 1,688.83 |
| Control | 6006 | Leucine<br>rich<br>repeat<br>containin<br>g 59                                                                            | gi 1096593<br>25,gi 59857<br>957,gi 7507<br>0060,gi 777<br>36103 | 34,862.40 | 100.00% | 4  | 7  | 9  | 0.10% | 20.60% | DKLDGN 5.04<br>ELDLSLS<br>DLNEVP<br>VKELAA<br>LPK | 3,035.62 |
| Control | 6006 | Leucine<br>rich<br>repeat<br>containin<br>g 59                                                                            | gi 1096593<br>25,gi 59857<br>957,gi 7507<br>0060,gi 777<br>36103 | 34,862.40 | 100.00% | 4  | 7  | 9  | 0.10% | 20.60% | LRQLPA 2.53<br>DFGR                               | 1,172.65 |
| Control | 6006 | Leucine<br>rich<br>repeat<br>containin<br>g 59                                                                            | gi 1096593<br>25,gi 59857<br>957,gi 7507<br>0060,gi 777<br>36103 | 34,862.40 | 100.00% | 4  | 7  | 9  | 0.10% | 20.60% | LVNLQH 3.13<br>LDLLNN<br>R                        | 1,561.88 |
| Control | 6006 | Leucine<br>rich<br>repeat<br>containin<br>g 59                                                                            | gi 1096593<br>25,gi 59857<br>957,gi 7507<br>0060,gi 777<br>36103 | 34,862.40 | 100.00% | 4  | 7  | 9  | 0.10% | 20.60% | LVTLPVS 4.93<br>FAQLK                             | 1,315.80 |
| Control | 6006 | RecName<br>:<br>Full=CD<br>GSH iron<br>sulfur<br>domain-<br>containin<br>g protein<br>1;<br>AltName:<br>Full=Mit<br>oNEET | gi 1108257<br>57,gi 73587<br>067,gi 7740<br>4223                 | 11,964.80 | 99.70%  | 2  | 2  | 2  | 0.02% | 26.40% | HNEETG 4.69<br>DNVGPLI<br>IK                      | 1,635.83 |
| Control | 6006 | RecName<br>:<br>Full=CD<br>GSH iron<br>sulfur<br>domain-<br>containin<br>g protein<br>1;<br>AltName:<br>Full=Mit<br>oNEET | gi 1108257<br>57,gi 73587<br>067,gi 7740<br>4223                 | 11,964.80 | 99.70%  | 2  | 2  | 2  | 0.02% | 26.40% | VVHAFD 2.51<br>MEDLGD<br>K                        | 1,491.68 |

|         |      |                                                                                                                                                                                                                                         |           |         |   |   |   |       |       |                        |      |          |
|---------|------|-----------------------------------------------------------------------------------------------------------------------------------------------------------------------------------------------------------------------------------------|-----------|---------|---|---|---|-------|-------|------------------------|------|----------|
| Control | 6006 | RecName gi 1221440 :<br>Full=Stre ss-70 protein,<br>mitochon drial;<br>AltName:<br>Full=75 kDa<br>glucose-regulated protein;<br>AltName:<br>Full=GR P 75;<br>AltName:<br>Full=Heat shock<br>70 kDa<br>protein 9;<br>Flags:<br>Precursor | 73,724.40 | 100.00% | 3 | 3 | 3 | 0.03% | 5.45% | DAGQIS<br>GLNVLR       | 3.77 | 1,242.68 |
| Control | 6006 | RecName gi 1221440 :<br>Full=Stre ss-70 protein,<br>mitochon drial;<br>AltName:<br>Full=75 kDa<br>glucose-regulated protein;<br>AltName:<br>Full=GR P 75;<br>AltName:<br>Full=Heat shock<br>70 kDa<br>protein 9;<br>Flags:<br>Precursor | 73,724.40 | 100.00% | 3 | 3 | 3 | 0.03% | 5.45% | TTPSVV<br>AFTADG<br>ER | 3.36 | 1,450.72 |



|         |      |                                                                                                                                                                                                                                                           |                                                                   |           |         |   |   |   |       |        |                                                          |          |
|---------|------|-----------------------------------------------------------------------------------------------------------------------------------------------------------------------------------------------------------------------------------------------------------|-------------------------------------------------------------------|-----------|---------|---|---|---|-------|--------|----------------------------------------------------------|----------|
| Control | 6006 | RecName<br>:<br>Full=Stre<br>ss-70<br>protein,<br>mitochon<br>drial;<br>AltName:<br>Full=75<br>kDa<br>glucose-<br>regulated<br>protein;<br>AltName:<br>Full=GR<br>P 75;<br>AltName:<br>Full=Hea<br>t shock<br>70 kDa<br>protein 9;<br>Flags:<br>Precursor | gi 1221440<br>79,gi 14623<br>1780,gi 735<br>86960,gi 77<br>735995 | 73,724.40 | 100.00% | 3 | 3 | 3 | 0.03% | 5.45%  | VQQTQVQ 2.92<br>DLFGR                                    | 1,290.68 |
| Control | 6006 | RAB14<br>protein                                                                                                                                                                                                                                          | gi 1584550<br>25,gi 19553<br>9521                                 | 23,879.60 | 100.00% | 5 | 7 | 7 | 0.08% | 47.40% | ADLEAQ 3.27<br>RDVTYE<br>EAKQFA<br>EENGLL<br>FLEASA<br>K | 3,485.71 |
| Control | 6006 | RAB14<br>protein                                                                                                                                                                                                                                          | gi 1584550<br>25,gi 19553<br>9521                                 | 23,879.60 | 100.00% | 5 | 7 | 7 | 0.08% | 47.40% | IYQNIQD 3.95<br>GSLDLN<br>AAESGV<br>QHKPSA<br>PQGGR      | 3,150.56 |
| Control | 6006 | RAB14<br>protein                                                                                                                                                                                                                                          | gi 1584550<br>25,gi 19553<br>9521                                 | 23,879.60 | 100.00% | 5 | 7 | 7 | 0.08% | 47.40% | NLTNPN 3.82<br>TVIILIGN<br>K                             | 1,623.94 |
| Control | 6006 | RAB14<br>protein                                                                                                                                                                                                                                          | gi 1584550<br>25,gi 19553<br>9521                                 | 23,879.60 | 100.00% | 5 | 7 | 7 | 0.08% | 47.40% | TGENVE 3.04<br>DAFLEA<br>AKK                             | 1,621.81 |
| Control | 6006 | RAB14<br>protein                                                                                                                                                                                                                                          | gi 1584550<br>25,gi 19553<br>9521                                 | 23,879.60 | 100.00% | 5 | 7 | 7 | 0.08% | 47.40% | YIIIGDM 2.91<br>GVGK                                     | 1,181.62 |
| Control | 6006 | RAB2A,<br>member<br>RAS<br>oncogene<br>family                                                                                                                                                                                                             | gi 1099399<br>03,gi 11673<br>4835                                 | 20,833.10 | 100.00% | 2 | 3 | 5 | 0.05% | 13.20% | EHGLIF 2.91<br>METSAC                                    | 1,378.67 |
| Control | 6006 | RAB2A,<br>member<br>RAS<br>oncogene<br>family                                                                                                                                                                                                             | gi 1099399<br>03,gi 11673<br>4835                                 | 20,833.10 | 100.00% | 2 | 3 | 5 | 0.05% | 13.20% | GAAGAL 2.11<br>LVYDITR                                   | 1,319.73 |
| Control | 6006 | RAB5A,<br>member<br>RAS<br>oncogene<br>family                                                                                                                                                                                                             | gi 1139118<br>76,gi 11549<br>5947,gi 122<br>144200                | 23,670.90 | 100.00% | 3 | 4 | 5 | 0.05% | 18.10% | GRGVDL 2.72<br>TEPTQPT<br>R                              | 1,526.79 |
| Control | 6006 | RAB5A,<br>member<br>RAS<br>oncogene<br>family                                                                                                                                                                                                             | gi 1139118<br>76,gi 11549<br>5947,gi 122<br>144200                | 23,670.90 | 100.00% | 3 | 4 | 5 | 0.05% | 18.10% | GVDLTE 2.51<br>PTQPTR                                    | 1,313.67 |

|         |      |                                                                          |                                                                                                                                            |           |         |   |   |   |       |        |                                 |      |          |
|---------|------|--------------------------------------------------------------------------|--------------------------------------------------------------------------------------------------------------------------------------------|-----------|---------|---|---|---|-------|--------|---------------------------------|------|----------|
| Control | 6006 | RAB5A, member<br>RAS oncogene family                                     | gi 1139118<br>76,gi 11549<br>5947,gi 122144200                                                                                             | 23,670.90 | 100.00% | 3 | 4 | 5 | 0.05% | 18.10% | LVLLGE<br>SAVGK                 | 3.56 | 1,085.66 |
| Control | 6006 | RAB5A, member<br>RAS oncogene family                                     | gi 1139118<br>76,gi 11549<br>5947,gi 122144200                                                                                             | 23,670.90 | 100.00% | 3 | 4 | 5 | 0.05% | 18.10% | TSMNVN<br>EIFMAIA<br>K          | 2.82 | 1,584.78 |
| Control | 6006 | nucleosid e-<br>diphosph ate kinase<br>NBR-A                             | gi 1064895,<br>gi 1064897,<br>gi 1153118<br>23,gi 11549<br>6892,gi 119224069,gi 151556410,gi 169658382,gi 169658384,gi 1709243,gi 74354800 | 17,307.40 | 99.80%  | 2 | 2 | 2 | 0.02% | 19.10% | TFIAIKP<br>DGVQR                | 2.21 | 1,344.76 |
| Control | 6006 | nucleosid e-<br>diphosph ate kinase<br>NBR-A                             | gi 1064895,<br>gi 1064897,<br>gi 1153118<br>23,gi 11549<br>6892,gi 119224069,gi 151556410,gi 169658382,gi 169658384,gi 1709243,gi 74354800 | 17,307.40 | 99.80%  | 2 | 2 | 2 | 0.02% | 19.10% | VMLGET<br>NPADSK<br>PGTIR       | 3.35 | 1,801.91 |
| Control | 6006 | RecName :<br>Full=Vesicle-associated membrane protein 8;<br>Short=VAMP-8 | gi 1221404<br>20,gi 74353<br>894,gi 77735533                                                                                               | 11,339.40 | 100.00% | 3 | 3 | 4 | 0.04% | 33.00% | NKTEDL<br>EATSEHF<br>K          | 5.13 | 1,648.78 |
| Control | 6006 | RecName :<br>Full=Vesicle-associated membrane protein 8;<br>Short=VAMP-8 | gi 1221404<br>20,gi 74353<br>894,gi 77735533                                                                                               | 11,339.40 | 100.00% | 3 | 3 | 4 | 0.04% | 33.00% | NLRDEV<br>EGVK                  | 2.94 | 1,158.61 |
| Control | 6006 | RecName :<br>Full=Vesicle-associated membrane protein 8;<br>Short=VAMP-8 | gi 1221404<br>20,gi 74353<br>894,gi 77735533                                                                                               | 11,339.40 | 100.00% | 3 | 3 | 4 | 0.04% | 33.00% | NLRDEV<br>EGVKNI<br>MTQNVE<br>R | 3.08 | 2,260.14 |



|         |      |                                                                                                                                                                                                                                                                                                                     |                                   |           |         |   |   |       |        |                          |                                 |          |          |
|---------|------|---------------------------------------------------------------------------------------------------------------------------------------------------------------------------------------------------------------------------------------------------------------------------------------------------------------------|-----------------------------------|-----------|---------|---|---|-------|--------|--------------------------|---------------------------------|----------|----------|
| Control | 6006 | RecName<br>: gi 1185973<br>Full=Ann<br>exin A1;<br>AltName:<br>Full=Ann<br>exin-1;<br>AltName:<br>Full=Ann<br>exin I;<br>AltName:<br>Full=Lip<br>ocortin I;<br>AltName:<br>Full=Cal<br>pactin II;<br>AltName:<br>Full=Chr<br>omobindi<br>n-9;<br>AltName:<br>Full=p35;<br>AltName:<br>Full=Pho<br>spholipas<br>e A2 | 38,881.20                         | 100.00%   | 4       | 4 | 5 | 0.05% | 20.20% | GLGTDE<br>DTLNEIL<br>ASR | 4.22                            | 1,703.84 |          |
| Control | 6006 | RecName<br>: gi 1185973<br>Full=Ann<br>exin A1;<br>AltName:<br>Full=Ann<br>exin-1;<br>AltName:<br>Full=Ann<br>exin I;<br>AltName:<br>Full=Lip<br>ocortin I;<br>AltName:<br>Full=Cal<br>pactin II;<br>AltName:<br>Full=Chr<br>omobindi<br>n-9;<br>AltName:<br>Full=p35;<br>AltName:<br>Full=Pho<br>spholipas<br>e A2 | 38,881.20                         | 100.00%   | 4       | 4 | 5 | 0.05% | 20.20% | TPAQFD<br>AEELR          | 3.57                            | 1,276.62 |          |
| Control | 6006 | LRRRC8C<br>protein                                                                                                                                                                                                                                                                                                  | gi 1487452<br>86,gi 14964<br>2813 | 92,305.20 | 100.00% | 5 | 6 | 6     | 0.07%  | 8.97%                    | IPQAVV<br>DVSSHL<br>QK          | 3.65     | 1,520.84 |
| Control | 6006 | LRRRC8C<br>protein                                                                                                                                                                                                                                                                                                  | gi 1487452<br>86,gi 14964<br>2813 | 92,305.20 | 100.00% | 5 | 6 | 6     | 0.07%  | 8.97%                    | NLEELY<br>LVGSL<br>HDIR         | 3.29     | 1,945.00 |
| Control | 6006 | LRRRC8C<br>protein                                                                                                                                                                                                                                                                                                  | gi 1487452<br>86,gi 14964<br>2813 | 92,305.20 | 100.00% | 5 | 6 | 6     | 0.07%  | 8.97%                    | SIEEIVSF<br>QHLLR               | 2.04     | 1,457.77 |
| Control | 6006 | LRRRC8C<br>protein                                                                                                                                                                                                                                                                                                  | gi 1487452<br>86,gi 14964<br>2813 | 92,305.20 | 100.00% | 5 | 6 | 6     | 0.07%  | 8.97%                    | SNTTQS<br>GPEGSL<br>VNSQSL<br>K | 4.69     | 1,933.95 |
| Control | 6006 | LRRRC8C<br>protein                                                                                                                                                                                                                                                                                                  | gi 1487452<br>86,gi 14964<br>2813 | 92,305.20 | 100.00% | 5 | 6 | 6     | 0.07%  | 8.97%                    | YLDLSY<br>NDIR                  | 2.74     | 1,271.63 |

|         |      |                                                                                                                                                        |                                                                            |            |         |   |   |   |       |       |                             |      |          |
|---------|------|--------------------------------------------------------------------------------------------------------------------------------------------------------|----------------------------------------------------------------------------|------------|---------|---|---|---|-------|-------|-----------------------------|------|----------|
| Control | 6006 | MGAT1 protein                                                                                                                                          | gi 154426138,gi 59858237,gi 62751783                                       | 51,684.70  | 100.00% | 3 | 3 | 3 | 0.03% | 8.05% | GIVSFLY R                   | 2.36 | 954.5407 |
| Control | 6006 | MGAT1 protein                                                                                                                                          | gi 154426138,gi 59858237,gi 62751783                                       | 51,684.70  | 100.00% | 3 | 3 | 3 | 0.03% | 8.05% | LAQDAE VELER                | 2.57 | 1,272.64 |
| Control | 6006 | MGAT1 protein                                                                                                                                          | gi 154426138,gi 59858237,gi 62751783                                       | 51,684.70  | 100.00% | 3 | 3 | 3 | 0.03% | 8.05% | LNQHFV PFTQLDL SYLR         | 5.12 | 2,091.10 |
| Control | 6006 | Chain A, Structure Of Mammalian C3 With An Intact Thioester At 3a Resolution                                                                           | gi 110590846,gi 110590847,gi 124056491,gi 83764016,gi 86438252,gi 99028969 | 187,214.10 | 100.00% | 3 | 4 | 8 | 0.09% | 3.49% | LYNVEA TSYALL ALLAR         | 3.54 | 1,881.05 |
| Control | 6006 | Chain A, Structure Of Mammalian C3 With An Intact Thioester At 3a Resolution                                                                           | gi 110590846,gi 110590847,gi 124056491,gi 83764016,gi 86438252,gi 99028969 | 187,214.10 | 100.00% | 3 | 4 | 8 | 0.09% | 3.49% | RPYTVAI AAYALA LLGK         | 4.95 | 1,791.05 |
| Control | 6006 | Chain A, Structure Of Mammalian C3 With An Intact Thioester At 3a Resolution                                                                           | gi 110590846,gi 110590847,gi 124056491,gi 83764016,gi 86438252,gi 99028969 | 187,214.10 | 100.00% | 3 | 4 | 8 | 0.09% | 3.49% | YYGGGY GSTQAT FMVFQA LAQYQK | 2.73 | 2,679.25 |
| Control | 6006 | PREDICTED: similar to Thioredoxin domain-containing protein 5 precursor (Thioredoxin-like protein p46) (Endoplasmic reticulum protein ERp46) isoform 1 | gi 119915902                                                               | 45,792.10  | 99.80%  | 2 | 2 | 2 | 0.02% | 4.55% | FFKPGQ EAVK                 | 2.47 | 1,150.63 |

|         |      |                                                                                                                                                                        |                                                                      |           |         |   |   |    |       |        |              |      |          |
|---------|------|------------------------------------------------------------------------------------------------------------------------------------------------------------------------|----------------------------------------------------------------------|-----------|---------|---|---|----|-------|--------|--------------|------|----------|
| Control | 6006 | PREDICTED:<br>similar to Thioredoxin domain-containing protein 5 precursor (Thioredoxin-like protein p46) (Endoplasmic reticulum protein ERp46) isoform 1              | gi 1199159                                                           | 45,792.10 | 99.80%  | 2 | 2 | 2  | 0.02% | 4.55%  | GYPTLL LFR   | 2.58 | 1,079.62 |
| Control | 6006 | RecName: Full=Translocator associated protein subunit delta; Short=TRAP-delta; AltName: Full=Signal sequence receptor subunit delta; Short=SSR-delta; Flags: Precursor | gi 1221371<br>: 13,gi 83638<br>Full=Tra 548,gi 8437<br>nslocon- 0035 | 18,796.20 | 100.00% | 5 | 8 | 11 | 0.12% | 29.70% | FFDEESY SLLR | 3.04 | 1,405.66 |



|         |      |                                                                                                                                                                                                                                             |                                                  |           |         |   |   |    |       |        |                                      |          |
|---------|------|---------------------------------------------------------------------------------------------------------------------------------------------------------------------------------------------------------------------------------------------|--------------------------------------------------|-----------|---------|---|---|----|-------|--------|--------------------------------------|----------|
| Control | 6006 | RecName<br>:<br>Full=Tra<br>nslocon-<br>associate<br>d protein<br>subunit<br>delta;<br>Short=T<br>RAP-<br>delta;<br>AltName:<br>Full=Sig<br>nal<br>sequence<br>receptor<br>subunit<br>delta;<br>Short=SS<br>R-delta;<br>Flags:<br>Precursor | gi 1221371<br>13,gi 83638<br>548,gi 8437<br>0035 | 18,796.20 | 100.00% | 5 | 8 | 11 | 0.12% | 29.70% | VQNMAL 3.82<br>YADVSG<br>K           | 1,411.69 |
| Control | 6006 | RecName<br>:<br>Full=Tra<br>nslocon-<br>associate<br>d protein<br>subunit<br>delta;<br>Short=T<br>RAP-<br>delta;<br>AltName:<br>Full=Sig<br>nal<br>sequence<br>receptor<br>subunit<br>delta;<br>Short=SS<br>R-delta;<br>Flags:<br>Precursor | gi 1221371<br>13,gi 83638<br>548,gi 8437<br>0035 | 18,796.20 | 100.00% | 5 | 8 | 11 | 0.12% | 29.70% | VQNMAL 3.33<br>YADVSG<br>KQFPVT<br>R | 2,140.09 |
| Control | 6006 | Transloca<br>se of<br>outer<br>mitochon<br>drial<br>membran<br>e 70<br>homolog<br>A (S.<br>cerevisiae<br>)                                                                                                                                  | gi 1153050<br>42,gi 11549<br>6634                | 67,553.40 | 99.80%  | 2 | 3 | 3  | 0.03% | 3.78%  | LRPESAL 4.13<br>AQAQK                | 1,311.74 |



|         |      |                                                                                     |                                                  |           |         |   |   |   |       |       |                 |      |          |
|---------|------|-------------------------------------------------------------------------------------|--------------------------------------------------|-----------|---------|---|---|---|-------|-------|-----------------|------|----------|
| Control | 6006 | Translocase of outer mitochondrial membrane 70 homolog A (S. cerevisiae)            | gi 115305042,gi 115496634                        | 67,553.40 | 99.80%  | 2 | 3 | 3 | 0.03% | 3.78% | NVDLST FYQNR    | 2.94 | 1,356.65 |
| Control | 6006 | RecName: Full=Elongation factor 1-gamma; Short=EF1-gamma; AltName: Full=eEF1B gamma | gi 122146155,gi 74268360,gi 94966781,gi 95769122 | 50,360.80 | 100.00% | 3 | 4 | 4 | 0.04% | 7.50% | AKDPFA HLPK     | 3.12 | 1,123.63 |
| Control | 6006 | RecName: Full=Elongation factor 1-gamma; Short=EF1-gamma; AltName: Full=eEF1B gamma | gi 122146155,gi 74268360,gi 94966781,gi 95769122 | 50,360.80 | 100.00% | 3 | 4 | 4 | 0.04% | 7.50% | ALIAAQ YSGAQV R | 2.68 | 1,347.74 |
| Control | 6006 | RecName: Full=Elongation factor 1-gamma; Short=EF1-gamma; AltName: Full=eEF1B gamma | gi 122146155,gi 74268360,gi 94966781,gi 95769122 | 50,360.80 | 100.00% | 3 | 4 | 4 | 0.04% | 7.50% | ILGLLDA HLK     | 3.04 | 1,092.68 |
| Control | 6006 | lysosomal associated membrane protein 2 isoform 1                                   | gi 164420738,gi 74353978,gi 77736087             | 44,524.90 | 100.00% | 3 | 3 | 5 | 0.05% | 5.16% | IPLNDIF R       | 3.21 | 987.5623 |
| Control | 6006 | lysosomal associated membrane protein 2 isoform 1                                   | gi 164420738,gi 74353978,gi 77736087             | 44,524.90 | 100.00% | 3 | 3 | 5 | 0.05% | 5.16% | VALKIPL NDIFR   | 4.32 | 1,398.85 |

|         |      |                                                    |                                      |            |         |    |    |    |       |        |                                   |      |          |
|---------|------|----------------------------------------------------|--------------------------------------|------------|---------|----|----|----|-------|--------|-----------------------------------|------|----------|
| Control | 6006 | lysosomal-associate d membrane protein 2 isoform 1 | gi 164420738,gi 74353978,gi 77736087 | 44,524.90  | 100.00% | 3  | 3  | 5  | 0.05% | 5.16%  | YLDFVF AVK                        | 1.93 | 1,101.60 |
| Control | 6006 | Nicastrin                                          | gi 74267600,gi 77735901              | 79,055.00  | 99.80%  | 2  | 2  | 2  | 0.02% | 3.63%  | ALAGVA TVLAR                      | 2.95 | 1,041.64 |
| Control | 6006 | Nicastrin                                          | gi 74267600,gi 77735901              | 79,055.00  | 99.80%  | 2  | 2  | 2  | 0.02% | 3.63%  | MATAGG GCVADP GSR                 | 3.12 | 1,349.59 |
| Control | 6006 | PGRMC 2 protein                                    | gi 148744919,gi 149642895            | 23,693.20  | 100.00% | 4  | 5  | 6  | 0.07% | 18.80% | DFSLEQLR                          | 2.51 | 1,007.52 |
| Control | 6006 | PGRMC 2 protein                                    | gi 148744919,gi 149642895            | 23,693.20  | 100.00% | 4  | 5  | 6  | 0.07% | 18.80% | FYGPAG PYGIFAGR                   | 3.97 | 1,472.73 |
| Control | 6006 | PGRMC 2 protein                                    | gi 148744919,gi 149642895            | 23,693.20  | 100.00% | 4  | 5  | 6  | 0.07% | 18.80% | GLGAGA GAGEES PAASLPR             | 3.77 | 1,667.83 |
| Control | 6006 | PGRMC 2 protein                                    | gi 148744919,gi 149642895            | 23,693.20  | 100.00% | 4  | 5  | 6  | 0.07% | 18.80% | RGLGAG AGAGEE SPAASLPR            | 3.28 | 1,823.94 |
| Control | 6006 | PREDICTED: similar to myoferlin isoform 12         | gi 194678941                         | 234,648.00 | 100.00% | 20 | 25 | 28 | 0.30% | 15.50% | FGKPDPI VSVIFKDEK                 | 3.49 | 1,819.00 |
| Control | 6006 | PREDICTED: similar to myoferlin isoform 12         | gi 194678941                         | 234,648.00 | 100.00% | 20 | 25 | 28 | 0.30% | 15.50% | FKGFPPP VLSEDG SSIR               | 3.95 | 1,832.95 |
| Control | 6006 | PREDICTED: similar to myoferlin isoform 12         | gi 194678941                         | 234,648.00 | 100.00% | 20 | 25 | 28 | 0.30% | 15.50% | GNNPFF DELFFY NVHLTP SELMDEI ISIR | 3.11 | 3,473.67 |
| Control | 6006 | PREDICTED: similar to myoferlin isoform 12         | gi 194678941                         | 234,648.00 | 100.00% | 20 | 25 | 28 | 0.30% | 15.50% | HKDGSN LPILPSQR                   | 3.52 | 1,561.84 |
| Control | 6006 | PREDICTED: similar to myoferlin isoform 12         | gi 194678941                         | 234,648.00 | 100.00% | 20 | 25 | 28 | 0.30% | 15.50% | ILHQHLG PPEER                     | 3.2  | 1,425.76 |
| Control | 6006 | PREDICTED: similar to myoferlin isoform 12         | gi 194678941                         | 234,648.00 | 100.00% | 20 | 25 | 28 | 0.30% | 15.50% | ILVELST LLEK                      | 3.25 | 1,257.77 |
| Control | 6006 | PREDICTED: similar to myoferlin isoform 12         | gi 194678941                         | 234,648.00 | 100.00% | 20 | 25 | 28 | 0.30% | 15.50% | IPAHQVL YSTSGG DASGK              | 2.42 | 1,787.89 |

|         |      |                                                   |            |            |         |    |    |    |       |        |                           |      |          |
|---------|------|---------------------------------------------------|------------|------------|---------|----|----|----|-------|--------|---------------------------|------|----------|
| Control | 6006 | PREDIC TED: 41<br>similar to myoferlin isoform 12 | gi 1946789 | 234,648.00 | 100.00% | 20 | 25 | 28 | 0.30% | 15.50% | ISVYDY DTFR               | 2.36 | 1,379.65 |
| Control | 6006 | PREDIC TED: 41<br>similar to myoferlin isoform 12 | gi 1946789 | 234,648.00 | 100.00% | 20 | 25 | 28 | 0.30% | 15.50% | ISVYDY DTFTRD EK          | 2.24 | 1,751.81 |
| Control | 6006 | PREDIC TED: 41<br>similar to myoferlin isoform 12 | gi 1946789 | 234,648.00 | 100.00% | 20 | 25 | 28 | 0.30% | 15.50% | IYRAEDI PQMDDA FSQTVK     | 3.91 | 2,243.07 |
| Control | 6006 | PREDIC TED: 41<br>similar to myoferlin isoform 12 | gi 1946789 | 234,648.00 | 100.00% | 20 | 25 | 28 | 0.30% | 15.50% | NLMALD KDSFSD PYAHVS FLHR | 2.78 | 2,579.23 |
| Control | 6006 | PREDIC TED: 41<br>similar to myoferlin isoform 12 | gi 1946789 | 234,648.00 | 100.00% | 20 | 25 | 28 | 0.30% | 15.50% | NLVDPF VEVSFA GK          | 2.76 | 1,521.79 |
| Control | 6006 | PREDIC TED: 41<br>similar to myoferlin isoform 12 | gi 1946789 | 234,648.00 | 100.00% | 20 | 25 | 28 | 0.30% | 15.50% | LLTEA DAGHTE FTDEVY QNESR | 4.46 | 2,612.17 |
| Control | 6006 | PREDIC TED: 41<br>similar to myoferlin isoform 12 | gi 1946789 | 234,648.00 | 100.00% | 20 | 25 | 28 | 0.30% | 15.50% | TLHSSFQ PNISQGR           | 3.72 | 1,571.79 |
| Control | 6006 | PREDIC TED: 41<br>similar to myoferlin isoform 12 | gi 1946789 | 234,648.00 | 100.00% | 20 | 25 | 28 | 0.30% | 15.50% | TQGLVP EHVETR             | 2.72 | 1,365.71 |
| Control | 6006 | PREDIC TED: 41<br>similar to myoferlin isoform 12 | gi 1946789 | 234,648.00 | 100.00% | 20 | 25 | 28 | 0.30% | 15.50% | VENTLE VLNEKE ADERPA GK   | 2.44 | 2,274.13 |
| Control | 6006 | PREDIC TED: 41<br>similar to myoferlin isoform 12 | gi 1946789 | 234,648.00 | 100.00% | 20 | 25 | 28 | 0.30% | 15.50% | VFLPKEE LYMPPL VIK        | 3.18 | 1,932.09 |
| Control | 6006 | PREDIC TED: 41<br>similar to myoferlin isoform 12 | gi 1946789 | 234,648.00 | 100.00% | 20 | 25 | 28 | 0.30% | 15.50% | VIEDRD NYIPNTL NPVFGR     | 3.9  | 2,232.14 |

|         |      |                                                                         |                                                     |            |         |    |    |    |       |        |                                     |      |          |
|---------|------|-------------------------------------------------------------------------|-----------------------------------------------------|------------|---------|----|----|----|-------|--------|-------------------------------------|------|----------|
| Control | 6006 | PREDICTED:<br>similar to myoferlin isoform 12                           | gi 1946789<br>41                                    | 234,648.00 | 100.00% | 20 | 25 | 28 | 0.30% | 15.50% | VIIELFD<br>NDQVGK<br>DEFLGR         | 2.53 | 2,207.13 |
| Control | 6006 | PREDICTED:<br>similar to myoferlin isoform 12                           | gi 1946789<br>41                                    | 234,648.00 | 100.00% | 20 | 25 | 28 | 0.30% | 15.50% | VIVESAS<br>NIPK                     | 3.06 | 1,156.66 |
| Control | 6006 | TXNDC1 3 protein                                                        | gi 1488784<br>48,gi 149642897                       | 38,865.40  | 99.80%  | 2  | 2  | 2  | 0.02% | 7.18%  | FFVTTLP<br>AFFHAK                   | 3.85 | 1,525.82 |
| Control | 6006 | TXNDC1 3 protein                                                        | gi 1488784<br>48,gi 149642897                       | 38,865.40  | 99.80%  | 2  | 2  | 2  | 0.02% | 7.18%  | VDVIQEP<br>GLSGR                    | 3.48 | 1,269.68 |
| Control | 6006 | OClA domain containin g 1                                               | gi 5985850<br>9,gi 62751843,gi 75040205             | 27,811.90  | 100.00% | 4  | 4  | 4  | 0.04% | 17.80% | FKNLEN<br>SPLGEAL<br>R              | 4    | 1,587.85 |
| Control | 6006 | OClA domain containin g 1                                               | gi 5985850<br>9,gi 62751843,gi 75040205             | 27,811.90  | 100.00% | 4  | 4  | 4  | 0.04% | 17.80% | NLENSPL<br>GEALR                    | 2.76 | 1,312.69 |
| Control | 6006 | OClA domain containin g 1                                               | gi 5985850<br>9,gi 62751843,gi 75040205             | 27,811.90  | 100.00% | 4  | 4  | 4  | 0.04% | 17.80% | NRESYE<br>VTLTHK                    | 3.19 | 1,476.74 |
| Control | 6006 | OClA domain containin g 1                                               | gi 5985850<br>9,gi 62751843,gi 75040205             | 27,811.90  | 100.00% | 4  | 4  | 4  | 0.04% | 17.80% | SVPLAA<br>TSMLITQ<br>GLISK          | 2.88 | 1,846.04 |
| Control | 6006 | RecName : Full=Heterogeneous nuclear ribonucleoprotein K; Short=hnRNP K | gi 1088607<br>77,gi 74354615,gi 77736071            | 51,003.40  | 99.80%  | 2  | 2  | 2  | 0.02% | 7.76%  | GSYGD<br>GGPIIT<br>QVTIPK           | 3.67 | 1,917.03 |
| Control | 6006 | RecName : Full=Heterogeneous nuclear ribonucleoprotein K; Short=hnRNP K | gi 1088607<br>77,gi 74354615,gi 77736071            | 51,003.40  | 99.80%  | 2  | 2  | 2  | 0.02% | 7.76%  | TDYNAS<br>VSPD<br>SGPER             | 3.21 | 1,780.80 |
| Control | 6006 | myristoylated alanine-rich protein kinase C substrate                   | gi 1154954<br>97,gi 148872484,gi 163340,gi 94534743 | 31,960.80  | 99.80%  | 2  | 3  | 5  | 0.05% | 6.87%  | GEATAE<br>RPGEAA<br>VASSPK          | 4.27 | 1,814.89 |
| Control | 6006 | myristoylated alanine-rich protein kinase C substrate                   | gi 1154954<br>97,gi 148872484,gi 163340,gi 94534743 | 31,960.80  | 99.80%  | 2  | 3  | 5  | 0.05% | 6.87%  | TAAKGE<br>ATAERP<br>GEEAVA<br>SSPSK | 3.18 | 2,186.10 |

|         |      |                                                      |                                                 |           |         |    |    |    |       |        |                                       |          |
|---------|------|------------------------------------------------------|-------------------------------------------------|-----------|---------|----|----|----|-------|--------|---------------------------------------|----------|
| Control | 6006 | vascular<br>endotheli<br>al<br>cadherin<br>precursor | gi 3430529<br>9,gi 486753<br>81,gi 75071<br>940 | 87,450.60 | 100.00% | 11 | 14 | 16 | 0.17% | 13.90% | FKMLAE 1.74<br>LYGSDP<br>QEELVY       | 2,148.02 |
| Control | 6006 | vascular<br>endotheli<br>al<br>cadherin<br>precursor | gi 3430529<br>9,gi 486753<br>81,gi 75071<br>940 | 87,450.60 | 100.00% | 11 | 14 | 16 | 0.17% | 13.90% | NLESPSS 2.63<br>FTIK                  | 1,222.63 |
| Control | 6006 | vascular<br>endotheli<br>al<br>cadherin<br>precursor | gi 3430529<br>9,gi 486753<br>81,gi 75071<br>940 | 87,450.60 | 100.00% | 11 | 14 | 16 | 0.17% | 13.90% | PSLYAQ 2.28<br>VQKPPR                 | 1,383.77 |
| Control | 6006 | vascular<br>endotheli<br>al<br>cadherin<br>precursor | gi 3430529<br>9,gi 486753<br>81,gi 75071<br>940 | 87,450.60 | 100.00% | 11 | 14 | 16 | 0.17% | 13.90% | RTSDKG 3.49<br>QFFGITK                | 1,484.79 |
| Control | 6006 | vascular<br>endotheli<br>al<br>cadherin<br>precursor | gi 3430529<br>9,gi 486753<br>81,gi 75071<br>940 | 87,450.60 | 100.00% | 11 | 14 | 16 | 0.17% | 13.90% | TSDKGQ 3.23<br>FFGITK                 | 1,328.68 |
| Control | 6006 | vascular<br>endotheli<br>al<br>cadherin<br>precursor | gi 3430529<br>9,gi 486753<br>81,gi 75071<br>940 | 87,450.60 | 100.00% | 11 | 14 | 16 | 0.17% | 13.90% | VDKNTG 4.32<br>DVYALE<br>R            | 1,479.74 |
| Control | 6006 | vascular<br>endotheli<br>al<br>cadherin<br>precursor | gi 3430529<br>9,gi 486753<br>81,gi 75071<br>940 | 87,450.60 | 100.00% | 11 | 14 | 16 | 0.17% | 13.90% | VFRVDK 3.5<br>NTGDVY<br>ALER          | 1,881.98 |
| Control | 6006 | vascular<br>endotheli<br>al<br>cadherin<br>precursor | gi 3430529<br>9,gi 486753<br>81,gi 75071<br>940 | 87,450.60 | 100.00% | 11 | 14 | 16 | 0.17% | 13.90% | VGSPLG 3.35<br>SLFVEDP<br>DEPQNR      | 2,056.00 |
| Control | 6006 | vascular<br>endotheli<br>al<br>cadherin<br>precursor | gi 3430529<br>9,gi 486753<br>81,gi 75071<br>940 | 87,450.60 | 100.00% | 11 | 14 | 16 | 0.17% | 13.90% | VGSPLG 2.09<br>SLFVEDP<br>DEPQNR<br>K | 2,184.09 |
| Control | 6006 | vascular<br>endotheli<br>al<br>cadherin<br>precursor | gi 3430529<br>9,gi 486753<br>81,gi 75071<br>940 | 87,450.60 | 100.00% | 11 | 14 | 16 | 0.17% | 13.90% | YSFVQG 2.9<br>EYR                     | 1,148.54 |
| Control | 6006 | vascular<br>endotheli<br>al<br>cadherin<br>precursor | gi 3430529<br>9,gi 486753<br>81,gi 75071<br>940 | 87,450.60 | 100.00% | 11 | 14 | 16 | 0.17% | 13.90% | YTFSVPE 2.21<br>DIR                   | 1,226.61 |
| Control | 6006 | LOC515<br>309<br>protein                             | gi 1488784<br>60,gi 14977<br>3584               | 31,548.40 | 100.00% | 3  | 4  | 4  | 0.04% | 13.40% | KEEEEE 5.84<br>EEYDEG<br>SNLKR        | 2,241.96 |

|         |      |                                                                     |                                                  |           |         |   |   |   |       |        |                                 |          |
|---------|------|---------------------------------------------------------------------|--------------------------------------------------|-----------|---------|---|---|---|-------|--------|---------------------------------|----------|
| Control | 6006 | LOC515309 protein                                                   | gi 148878460,gi 149773584                        | 31,548.40 | 100.00% | 3 | 4 | 4 | 0.04% | 13.40% | LYIEFVK 2.21                    | 911.5237 |
| Control | 6006 | LOC515309 protein                                                   | gi 148878460,gi 149773584                        | 31,548.40 | 100.00% | 3 | 4 | 4 | 0.04% | 13.40% | SNPEDQI 2.44<br>LYQTER          | 1,592.76 |
| Control | 6006 | acyl-CoA synthetase long-chain family member 5                      | gi 115497154,gi 152941112,gi 94534758            | 76,013.10 | 100.00% | 3 | 3 | 3 | 0.03% | 5.86%  | ALVLISN 2.82<br>VEK             | 1,085.66 |
| Control | 6006 | acyl-CoA synthetase long-chain family member 5                      | gi 115497154,gi 152941112,gi 94534758            | 76,013.10 | 100.00% | 3 | 3 | 3 | 0.03% | 5.86%  | GAMLTH 2.53<br>ANIVSN<br>ASGFLK | 1,846.95 |
| Control | 6006 | acyl-CoA synthetase long-chain family member 5                      | gi 115497154,gi 152941112,gi 94534758            | 76,013.10 | 100.00% | 3 | 3 | 3 | 0.03% | 5.86%  | PQPALP 2.78<br>HVDLNK           | 1,328.73 |
| Control | 6006 | transporter 2, ATP-binding cassette, sub-family B                   | gi 114051053,gi 19171652,gi 27806345,gi 63169160 | 79,287.60 | 99.80%  | 2 | 2 | 2 | 0.02% | 4.31%  | LQTVQS 3.85<br>ADQVLV<br>LR     | 1,569.90 |
| Control | 6006 | transporter 2, ATP-binding cassette, sub-family B                   | gi 114051053,gi 19171652,gi 27806345,gi 63169160 | 79,287.60 | 99.80%  | 2 | 2 | 2 | 0.02% | 4.31%  | QVVLVG 3.99<br>QEPVLFS<br>GSVR  | 1,814.02 |
| Control | 6006 | ATP synthase, H+ transporting, mitochondrial F0 complex, subunit F2 | gi 165973956,gi 2493087,gi 81294315              | 10,254.50 | 99.80%  | 2 | 3 | 4 | 0.04% | 25.00% | DFTPSGI 3.67<br>AGAFQR          | 1,366.68 |
| Control | 6006 | ATP synthase, H+ transporting, mitochondrial F0 complex, subunit F2 | gi 165973956,gi 2493087,gi 81294315              | 10,254.50 | 99.80%  | 2 | 3 | 4 | 0.04% | 25.00% | YYNKYV 3.02<br>NVK              | 1,190.62 |

|         |      |                                                                                                                                         |           |         |   |   |   |       |        |                                         |          |
|---------|------|-----------------------------------------------------------------------------------------------------------------------------------------|-----------|---------|---|---|---|-------|--------|-----------------------------------------|----------|
| Control | 6006 | RecName gi 1185727 :<br>78,gi 81674<br>Full=Mal 781<br>ate<br>dehydrog<br>enase,<br>mitochon<br>drial;<br>Flags:<br>Precursor           | 35,651.00 | 100.00% | 5 | 6 | 6 | 0.07% | 25.10% | ANAFVA 3.15<br>ELKDLLD<br>PAR           | 1,629.86 |
| Control | 6006 | RecName gi 1185727 :<br>78,gi 81674<br>Full=Mal 781<br>ate<br>dehydrog<br>enase,<br>mitochon<br>drial;<br>Flags:<br>Precursor           | 35,651.00 | 100.00% | 5 | 6 | 6 | 0.07% | 25.10% | LTLYDIA 2.64<br>HTPGVA<br>ADLSHIE<br>TR | 2,393.25 |
| Control | 6006 | RecName gi 1185727 :<br>78,gi 81674<br>Full=Mal 781<br>ate<br>dehydrog<br>enase,<br>mitochon<br>drial;<br>Flags:<br>Precursor           | 35,651.00 | 100.00% | 5 | 6 | 6 | 0.07% | 25.10% | VAVLGA 4.22<br>SGGIGQP<br>LSLLLK        | 1,793.09 |
| Control | 6006 | RecName gi 1185727 :<br>78,gi 81674<br>Full=Mal 781<br>ate<br>dehydrog<br>enase,<br>mitochon<br>drial;<br>Flags:<br>Precursor           | 35,651.00 | 100.00% | 5 | 6 | 6 | 0.07% | 25.10% | VNVPVI 2.91<br>GGHAGK                   | 1,147.66 |
| Control | 6006 | RecName gi 1185727 :<br>78,gi 81674<br>Full=Mal 781<br>ate<br>dehydrog<br>enase,<br>mitochon<br>drial;<br>Flags:<br>Precursor           | 35,651.00 | 100.00% | 5 | 6 | 6 | 0.07% | 25.10% | VSPFEEK 3.39<br>MIAEAIP<br>ELK          | 1,947.01 |
| Control | 6006 | Chain A, gi 1105910<br>Subcomp 26,gi 11059<br>lex Of 1029,gi 602<br>The 033<br>Stator Of<br>Bovine<br>Mitochon<br>drial Atp<br>Synthase | 24,651.00 | 100.00% | 5 | 5 | 9 | 0.10% | 26.60% | HYLFDV 2.86<br>QR                       | 1,077.55 |

|         |      |                                                                         |                                                                          |           |         |   |   |   |       |        |                                  |          |
|---------|------|-------------------------------------------------------------------------|--------------------------------------------------------------------------|-----------|---------|---|---|---|-------|--------|----------------------------------|----------|
| Control | 6006 | Chain A, Subcomp lex Of The Stator Of Bovine Mitochondrial Atp Synthase | gi 110591026,gi 110591029,gi 602033                                      | 24,651.00 | 100.00% | 5 | 5 | 9 | 0.10% | 26.60% | IAQLEEV 4.05<br>KQASIK           | 1,456.84 |
| Control | 6006 | Chain A, Subcomp lex Of The Stator Of Bovine Mitochondrial Atp Synthase | gi 110591026,gi 110591029,gi 602033                                      | 24,651.00 | 100.00% | 5 | 5 | 9 | 0.10% | 26.60% | LNEQKIA 3.3<br>QLEEVK            | 1,541.85 |
| Control | 6006 | Chain A, Subcomp lex Of The Stator Of Bovine Mitochondrial Atp Synthase | gi 110591026,gi 110591029,gi 602033                                      | 24,651.00 | 100.00% | 5 | 5 | 9 | 0.10% | 26.60% | NNIAMA 3.67<br>LEVTYR            | 1,410.70 |
| Control | 6006 | Chain A, Subcomp lex Of The Stator Of Bovine Mitochondrial Atp Synthase | gi 110591026,gi 110591029,gi 602033                                      | 24,651.00 | 100.00% | 5 | 5 | 9 | 0.10% | 26.60% | QIQDAID 3.4<br>MEKSQQ<br>ALVQKR  | 2,245.16 |
| Control | 6006 | Ribosomal protein S8                                                    | gi 119224110,gi 58760384,gi 59858489,gi 70778956,gi 74268417,gi 75070020 | 24,188.40 | 99.90%  | 2 | 3 | 3 | 0.03% | 14.90% | ADGYVL 3.28<br>EGKELE<br>FYLR    | 1,901.96 |
| Control | 6006 | Ribosomal protein S8                                                    | gi 119224110,gi 58760384,gi 59858489,gi 70778956,gi 74268417,gi 75070020 | 24,188.40 | 99.90%  | 2 | 3 | 3 | 0.03% | 14.90% | IIDVVYN 5.12<br>ASNNEL<br>VR     | 1,718.91 |
| Control | 6006 | PREDICTED: similar to oxysterol 7alpha-hydroxylase                      | gi 194672764                                                             | 90,479.20 | 100.00% | 2 | 2 | 2 | 0.02% | 4.34%  | AMAVLR 2.86<br>DEIDHLL<br>QSTGQK | 2,141.10 |
| Control | 6006 | PREDICTED: similar to oxysterol 7alpha-hydroxylase                      | gi 194672764                                                             | 90,479.20 | 100.00% | 2 | 2 | 2 | 0.02% | 4.34%  | YITFILD 2.15<br>PFHYTS<br>VAK    | 1,915.00 |



|         |      |                           |                                                                                                                                         |           |         |    |    |    |       |        |                                        |          |
|---------|------|---------------------------|-----------------------------------------------------------------------------------------------------------------------------------------|-----------|---------|----|----|----|-------|--------|----------------------------------------|----------|
| Control | 6006 | p33/41<br>(annexin<br>IV) | gi 1063258,<br>gi 113956,g<br>i 14278334,<br>gi 1578299<br>85,gi 15783<br>0000,gi 163<br>030,gi 216,<br>gi 4837408<br>3,gi 743539<br>76 | 35,872.70 | 100.00% | 3  | 3  | 3  | 0.03% | 11.90% | GLGTDD 3.33<br>DTLIR                   | 1,175.59 |
| Control | 6006 | p33/41<br>(annexin<br>IV) | gi 1063258,<br>gi 113956,g<br>i 14278334,<br>gi 1578299<br>85,gi 15783<br>0000,gi 163<br>030,gi 216,<br>gi 4837408<br>3,gi 743539<br>76 | 35,872.70 | 100.00% | 3  | 3  | 3  | 0.03% | 11.90% | GLGTDE 3.01<br>DAINVL<br>AYR           | 1,719.89 |
| Control | 6006 | p33/41<br>(annexin<br>IV) | gi 1063258,<br>gi 113956,g<br>i 14278334,<br>gi 1578299<br>85,gi 15783<br>0000,gi 163<br>030,gi 216,<br>gi 4837408<br>3,gi 743539<br>76 | 35,872.70 | 100.00% | 3  | 3  | 3  | 0.03% | 11.90% | INQTYQ 3.59<br>LQYGR                   | 1,383.70 |
| Control | 6006 | TUBA1B<br>protein         | gi 1488780<br>19,gi 16880<br>4008                                                                                                       | 50,133.70 | 100.00% | 11 | 14 | 19 | 0.21% | 33.70% | AVFVDL 4.6<br>EPTVIDE<br>VR            | 1,701.91 |
| Control | 6006 | TUBA1B<br>protein         | gi 1488780<br>19,gi 16880<br>4008                                                                                                       | 50,133.70 | 100.00% | 11 | 14 | 19 | 0.21% | 33.70% | DVNAAI 3.19<br>ATIK                    | 1,015.58 |
| Control | 6006 | TUBA1B<br>protein         | gi 1488780<br>19,gi 16880<br>4008                                                                                                       | 50,133.70 | 100.00% | 11 | 14 | 19 | 0.21% | 33.70% | EIIDLVL 2.32<br>DR                     | 1,085.62 |
| Control | 6006 | TUBA1B<br>protein         | gi 1488780<br>19,gi 16880<br>4008                                                                                                       | 50,133.70 | 100.00% | 11 | 14 | 19 | 0.21% | 33.70% | FDGALN 2.72<br>VDLTEF<br>QTNLVP<br>YPR | 2,409.21 |
| Control | 6006 | TUBA1B<br>protein         | gi 1488780<br>19,gi 16880<br>4008                                                                                                       | 50,133.70 | 100.00% | 11 | 14 | 19 | 0.21% | 33.70% | IHFPLAT 3.67<br>YAPVISA<br>EK          | 1,756.96 |
| Control | 6006 | TUBA1B<br>protein         | gi 1488780<br>19,gi 16880<br>4008                                                                                                       | 50,133.70 | 100.00% | 11 | 14 | 19 | 0.21% | 33.70% | LDHKFD 2.29<br>LMYAK                   | 1,396.69 |
| Control | 6006 | TUBA1B<br>protein         | gi 1488780<br>19,gi 16880<br>4008                                                                                                       | 50,133.70 | 100.00% | 11 | 14 | 19 | 0.21% | 33.70% | LISQIVSS 3.38<br>ITASLR                | 1,487.88 |
| Control | 6006 | TUBA1B<br>protein         | gi 1488780<br>19,gi 16880<br>4008                                                                                                       | 50,133.70 | 100.00% | 11 | 14 | 19 | 0.21% | 33.70% | NLDIERP 2.64<br>TYTNLN<br>R            | 1,718.88 |
| Control | 6006 | TUBA1B<br>protein         | gi 1488780<br>19,gi 16880<br>4008                                                                                                       | 50,133.70 | 100.00% | 11 | 14 | 19 | 0.21% | 33.70% | QLFHPE 3.26<br>QLITGKE<br>DAANNY<br>AR | 2,415.21 |
| Control | 6006 | TUBA1B<br>protein         | gi 1488780<br>19,gi 16880<br>4008                                                                                                       | 50,133.70 | 100.00% | 11 | 14 | 19 | 0.21% | 33.70% | RNLDIR 2.32<br>PTYTNL<br>NR            | 1,874.98 |
| Control | 6006 | TUBA1B<br>protein         | gi 1488780<br>19,gi 16880<br>4008                                                                                                       | 50,133.70 | 100.00% | 11 | 14 | 19 | 0.21% | 33.70% | TIGGGD 2.54<br>DSFNTEF<br>SETGAG<br>K  | 2,007.89 |























|         |      |                                                                                                                                                                                                                                           |            |         |    |    |    |       |        |                              |          |
|---------|------|-------------------------------------------------------------------------------------------------------------------------------------------------------------------------------------------------------------------------------------------|------------|---------|----|----|----|-------|--------|------------------------------|----------|
| Control | 6006 | RecName gi 266647<br>:<br>Full=Nitric oxide synthase, endothelial;<br>AltName: Full=Endothelial NOS;<br>Short=eNOS;<br>AltName: Full=EC-NOS;<br>AltName: Full=NO S type III;<br>Short=NO3;<br>AltName: Full=Constitutive NOS;<br>Short=cN | 133,270.00 | 100.00% | 19 | 27 | 31 | 0.34% | 18.20% | YHEDIFG 2.78<br>LTLR         | 1,363.70 |
| Control | 6006 | PREDIC gi 1199383<br>TED: 28,gi 14874<br>similar to 5492,gi 682<br>eukaryotic 99807,gi 86<br>c 827651<br>translation elongation factor 1 alpha 1 isoform 1                                                                                | 50,141.20  | 100.00% | 8  | 10 | 11 | 0.12% | 21.40% | EHALLA 3.51<br>YTLGVK        | 1,314.74 |
| Control | 6006 | PREDIC gi 1199383<br>TED: 28,gi 14874<br>similar to 5492,gi 682<br>eukaryotic 99807,gi 86<br>c 827651<br>translation elongation factor 1 alpha 1 isoform 1                                                                                | 50,141.20  | 100.00% | 8  | 10 | 11 | 0.12% | 21.40% | IGGIGTV 2.25<br>PVGR         | 1,025.61 |
| Control | 6006 | PREDIC gi 1199383<br>TED: 28,gi 14874<br>similar to 5492,gi 682<br>eukaryotic 99807,gi 86<br>c 827651<br>translation elongation factor 1 alpha 1 isoform 1                                                                                | 50,141.20  | 100.00% | 8  | 10 | 11 | 0.12% | 21.40% | LPLQDV 2.52<br>YK            | 975.5511 |
| Control | 6006 | PREDIC gi 1199383<br>TED: 28,gi 14874<br>similar to 5492,gi 682<br>eukaryotic 99807,gi 86<br>c 827651<br>translation elongation factor 1 alpha 1 isoform 1                                                                                | 50,141.20  | 100.00% | 8  | 10 | 11 | 0.12% | 21.40% | TIEKF EK 2.72<br>EAAEMG<br>K | 1,626.80 |

|         |      |                                                                                     |            |           |         |   |    |    |       |        |                             |      |          |
|---------|------|-------------------------------------------------------------------------------------|------------|-----------|---------|---|----|----|-------|--------|-----------------------------|------|----------|
| Control | 6006 | PREDIC TED: similar to eukaryotic translation elongation factor 1 alpha 1 isoform 1 | gi 1199383 | 50,141.20 | 100.00% | 8 | 10 | 11 | 0.12% | 21.40% | VETGVL KPGMVV TFAPVN VTTEVK | 3.9  | 2,531.38 |
| Control | 6006 | PREDIC TED: similar to eukaryotic translation elongation factor 1 alpha 1 isoform 1 | gi 1199383 | 50,141.20 | 100.00% | 8 | 10 | 11 | 0.12% | 21.40% | YEEIVKE VSTYIKK             | 2.67 | 1,728.94 |
| Control | 6006 | PREDIC TED: similar to eukaryotic translation elongation factor 1 alpha 1 isoform 1 | gi 1199383 | 50,141.20 | 100.00% | 8 | 10 | 11 | 0.12% | 21.40% | YYVTIID APGHR               | 2.58 | 1,404.73 |
| Control | 6006 | PREDIC TED: similar to eukaryotic translation elongation factor 1 alpha 1 isoform 1 | gi 1199383 | 50,141.20 | 100.00% | 8 | 10 | 11 | 0.12% | 21.40% | YYVTIID APGHRD FIK          | 2.02 | 1,908.00 |
| Control | 6006 | cell division cycle 42 (GTP binding protein, 25kDa)                                 | gi 1140524 | 21,240.70 | 100.00% | 2 | 3  | 4  | 0.04% | 19.90% | NVFDEAI LAALEPP EPK         | 3.38 | 1,852.97 |
| Control | 6006 | cell division cycle 42 (GTP binding protein, 25kDa)                                 | gi 1140524 | 21,240.70 | 100.00% | 2 | 3  | 4  | 0.04% | 19.90% | TPFLLVG TQIDLRD DPSTIEK     | 2.86 | 2,358.26 |
| Control | 6006 | minor histocompatibility antigen 13                                                 | gi 1644486 | 41,537.10 | 100.00% | 3 | 3  | 5  | 0.05% | 10.90% | GEVTEM FSYEESN PKDPAA VTETR | 3.31 | 2,703.21 |
| Control | 6006 | minor histocompatibility antigen 13                                                 | gi 1644486 | 41,537.10 | 100.00% | 3 | 3  | 5  | 0.05% | 10.90% | LVFPQD LLEK                 | 2.11 | 1,201.68 |

|         |      |                                                                   |                                                          |           |         |   |   |   |       |        |                                                |      |          |
|---------|------|-------------------------------------------------------------------|----------------------------------------------------------|-----------|---------|---|---|---|-------|--------|------------------------------------------------|------|----------|
| Control | 6006 | minor histocompatibility antigen 13                               | gi 164448616                                             | 41,537.10 | 100.00% | 3 | 3 | 5 | 0.05% | 10.90% | SFEAPIK<br>LVFPQD<br>LLEK                      | 3.09 | 1,974.09 |
| Control | 6006 | Interleukin 1 receptor accessory protein                          | gi 111305355,gi 115495597                                | 41,650.00 | 99.90%  | 2 | 2 | 2 | 0.02% | 5.83%  | QIQVYE<br>DEPAR                                | 3.05 | 1,347.65 |
| Control | 6006 | Interleukin 1 receptor accessory protein                          | gi 111305355,gi 115495597                                | 41,650.00 | 99.90%  | 2 | 2 | 2 | 0.02% | 5.83%  | VAFPLE<br>VVQK                                 | 2.29 | 1,129.66 |
| Control | 6006 | transcription factor EF1(A)                                       | gi 162983,gi 27807361,gi 54040030,gi 86821283            | 35,905.70 | 99.80%  | 2 | 2 | 2 | 0.02% | 18.20% | NYQQNY<br>QNSESG<br>EKNEGS<br>ESAPEG<br>QAQQR  | 5.28 | 3,257.40 |
| Control | 6006 | transcription factor EF1(A)                                       | gi 162983,gi 27807361,gi 54040030,gi 86821283            | 35,905.70 | 99.80%  | 2 | 2 | 2 | 0.02% | 18.20% | RPQYSN<br>PPVQGE<br>VMEGAD<br>NQGAGE<br>QGRPVR | 5.49 | 3,239.53 |
| Control | 6006 | RecName: Full=Apolipoprotein A-I; Short=ApoA-I; Flags: Precursor  | gi 113988,gi 146186566,gi 162678,gi 74268269,gi 75832056 | 30,253.70 | 99.80%  | 2 | 2 | 3 | 0.03% | 9.81%  | DYVAQF<br>EASALG<br>K                          | 3.62 | 1,398.69 |
| Control | 6006 | RecName: Full=Apolipoprotein A-I; Short=ApoA-I; Flags: Precursor  | gi 113988,gi 146186566,gi 162678,gi 74268269,gi 75832056 | 30,253.70 | 99.80%  | 2 | 2 | 3 | 0.03% | 9.81%  | VSILAAI<br>DEASKK                              | 2.82 | 1,344.77 |
| Control | 6006 | PREDICTED: similar to vesicle amine transport protein 1 isoform 1 | gi 76671278                                              | 42,822.00 | 100.00% | 4 | 4 | 4 | 0.04% | 14.70% | GVDIVM<br>DPLGGS<br>DTAK                       | 4.07 | 1,590.77 |
| Control | 6006 | PREDICTED: similar to vesicle amine transport protein 1 isoform 1 | gi 76671278                                              | 42,822.00 | 100.00% | 4 | 4 | 4 | 0.04% | 14.70% | LLALYN<br>QGHIKP<br>R                          | 2.05 | 1,522.89 |

|         |      |                                                                                                                                                |                                  |           |         |   |   |    |       |        |                                     |      |          |
|---------|------|------------------------------------------------------------------------------------------------------------------------------------------------|----------------------------------|-----------|---------|---|---|----|-------|--------|-------------------------------------|------|----------|
| Control | 6006 | PREDIC TED: 8<br>similar to vesicle amine transport protein 1 isoform 1                                                                        | gi 7667127                       | 42,822.00 | 100.00% | 4 | 4 | 4  | 0.04% | 14.70% | LQTRPA<br>APPAPG<br>TGQLTL<br>R     | 3.52 | 1,945.10 |
| Control | 6006 | PREDIC TED: 8<br>similar to vesicle amine transport protein 1 isoform 1                                                                        | gi 7667127                       | 42,822.00 | 100.00% | 4 | 4 | 4  | 0.04% | 14.70% | VLLVPG<br>PEKEN                     | 2.76 | 1,194.67 |
| Control | 6006 | PREDIC TED: 42<br>similar to Feline leukemia virus subgroup C receptor-related protein 1 (Feline leukemia virus subgroup C receptor) (hFLVC R) | gi 1946742                       | 59,731.10 | 99.80%  | 2 | 2 | 2  | 0.02% | 7.73%  | ATASGT<br>PDGPKT<br>PLAPEEE<br>TQAR | 3.97 | 2,324.14 |
| Control | 6006 | PREDIC TED: 42<br>similar to Feline leukemia virus subgroup C receptor-related protein 1 (Feline leukemia virus subgroup C receptor) (hFLVC R) | gi 1946742                       | 59,731.10 | 99.80%  | 2 | 2 | 2  | 0.02% | 7.73%  | LLPKDP<br>GEETPG<br>GEGTLV<br>PR    | 3.31 | 2,062.08 |
| Control | 6006 | RecName : Full=He moglobin subunit beta; AltName: Full=He moglobin beta chain; AltName: Full=Beta-globin                                       | gi 122572.gi 27819608,<br>gi 395 | 15,936.20 | 99.80%  | 2 | 5 | 17 | 0.19% | 35.20% | LLGNVL<br>VVVLAR                    | 4.74 | 1,265.83 |

|         |      |                                                                                                                                                              |                        |           |        |   |   |    |       |        |                                              |      |          |
|---------|------|--------------------------------------------------------------------------------------------------------------------------------------------------------------|------------------------|-----------|--------|---|---|----|-------|--------|----------------------------------------------|------|----------|
| Control | 6006 | RecName gi 122572.g<br>:<br>Full=He<br>moglobin<br>subunit<br>beta;<br>AltName:<br>Full=He<br>moglobin<br>beta<br>chain;<br>AltName:<br>Full=Beta-<br>globin | gi 27819608,<br>gi 395 | 15,936.20 | 99.80% | 2 | 5 | 17 | 0.19% | 35.20% | LLGNVL<br>VVVLAR<br>NFGKEF<br>TPVLQA<br>DFQK | 3.81 | 3,115.77 |
| Control | 6006 | RecName gi 122572.g<br>:<br>Full=He<br>moglobin<br>subunit<br>beta;<br>AltName:<br>Full=He<br>moglobin<br>beta<br>chain;<br>AltName:<br>Full=Beta-<br>globin | gi 27819608,<br>gi 395 | 15,936.20 | 99.80% | 2 | 5 | 17 | 0.19% | 35.20% | LLVVYP<br>WTQR                               | 3.19 | 1,274.73 |
| Control | 6006 | RecName gi 122572.g<br>:<br>Full=He<br>moglobin<br>subunit<br>beta;<br>AltName:<br>Full=He<br>moglobin<br>beta<br>chain;<br>AltName:<br>Full=Beta-<br>globin | gi 27819608,<br>gi 395 | 15,936.20 | 99.80% | 2 | 5 | 17 | 0.19% | 35.20% | NFGKEF<br>TPVLQA<br>DFQK                     | 2.84 | 1,868.95 |
| Control | 6006 | RecName gi 122572.g<br>:<br>Full=He<br>moglobin<br>subunit<br>beta;<br>AltName:<br>Full=He<br>moglobin<br>beta<br>chain;<br>AltName:<br>Full=Beta-<br>globin | gi 27819608,<br>gi 395 | 15,936.20 | 99.80% | 2 | 5 | 17 | 0.19% | 35.20% | VKVDEV<br>GGEALG<br>R                        | 4.12 | 1,328.72 |



|         |      |                                                                                                          |                                                                                                |            |         |   |   |   |       |        |                                           |          |
|---------|------|----------------------------------------------------------------------------------------------------------|------------------------------------------------------------------------------------------------|------------|---------|---|---|---|-------|--------|-------------------------------------------|----------|
| Control | 6006 | dihydroo<br>otate<br>dehydrog<br>enase<br>precursor                                                      | gi 1106656<br>38,gi 11236<br>2407,gi 598<br>57979,gi 62<br>751827,gi 7<br>5057853              | 42,758.80  | 99.80%  | 2 | 2 | 2 | 0.02% | 5.57%  | FTSLGLL 2.73<br>PR                        | 1,003.59 |
| Control | 6006 | dihydroo<br>otate<br>dehydrog<br>enase<br>precursor                                                      | gi 1106656<br>38,gi 11236<br>2407,gi 598<br>57979,gi 62<br>751827,gi 7<br>5057853              | 42,758.80  | 99.80%  | 2 | 2 | 2 | 0.02% | 5.57%  | VFRLPE 3.07<br>DQAIINR                    | 1,570.87 |
| Control | 6006 | TM9SF4<br>protein                                                                                        | gi 1461867<br>97,gi 16606<br>3945,gi 172<br>047290                                             | 74,351.10  | 100.00% | 3 | 4 | 5 | 0.05% | 7.01%  | AENLGE 2.67<br>VLRGDR                     | 1,328.69 |
| Control | 6006 | TM9SF4<br>protein                                                                                        | gi 1461867<br>97,gi 16606<br>3945,gi 172<br>047290                                             | 74,351.10  | 100.00% | 3 | 4 | 5 | 0.05% | 7.01%  | ISEDYYV 3.08<br>HLIADNL<br>PVATR          | 2,189.12 |
| Control | 6006 | TM9SF4<br>protein                                                                                        | gi 1461867<br>97,gi 16606<br>3945,gi 172<br>047290                                             | 74,351.10  | 100.00% | 3 | 4 | 5 | 0.05% | 7.01%  | IVNTPFQ 4.08<br>VLMNSE<br>K               | 1,635.84 |
| Control | 6006 | PREDIC<br>TED:<br>plexin A2                                                                              | gi 1946742<br>54                                                                               | 210,938.30 | 100.00% | 3 | 3 | 3 | 0.03% | 2.27%  | FVDDLDF 3.8<br>ETLFSTV<br>HR              | 1,825.91 |
| Control | 6006 | PREDIC<br>TED:<br>plexin A2                                                                              | gi 1946742<br>54                                                                               | 210,938.30 | 100.00% | 3 | 3 | 3 | 0.03% | 2.27%  | LLQAAY 2.79<br>LAKPGD<br>ALAR             | 1,670.96 |
| Control | 6006 | PREDIC<br>TED:<br>plexin A2                                                                              | gi 1946742<br>54                                                                               | 210,938.30 | 100.00% | 3 | 3 | 3 | 0.03% | 2.27%  | LNTLMH 2.66<br>YQVSDR                     | 1,492.72 |
| Control | 6006 | PREDIC<br>TED:<br>similar to<br>Glycerald<br>ehyde-3-<br>phosphat<br>e<br>dehydrog<br>enase<br>isoform 2 | gi 1198930<br>91,gi 18417<br>58,gi 22859<br>03,gi 73587<br>299,gi 7740<br>4273,gi 895<br>73947 | 35,850.00  | 99.90%  | 2 | 3 | 5 | 0.05% | 11.70% | GAAQNII 3.7<br>PASTGA<br>AK               | 1,369.74 |
| Control | 6006 | PREDIC<br>TED:<br>similar to<br>Glycerald<br>ehyde-3-<br>phosphat<br>e<br>dehydrog<br>enase<br>isoform 2 | gi 1198930<br>91,gi 18417<br>58,gi 22859<br>03,gi 73587<br>299,gi 7740<br>4273,gi 895<br>73947 | 35,850.00  | 99.90%  | 2 | 3 | 5 | 0.05% | 11.70% | VIHDHF 3.73<br>GIVEGL<br>MTTVHA<br>ITATQK | 2,634.37 |
| Control | 6006 | TMEM4<br>3 protein                                                                                       | gi 1515560<br>45,gi 15652<br>3072                                                              | 44,774.20  | 100.00% | 3 | 3 | 3 | 0.03% | 12.70% | FFLSAGL 2.29<br>IDKVDN<br>FK              | 1,713.92 |
| Control | 6006 | TMEM4<br>3 protein                                                                                       | gi 1515560<br>45,gi 15652<br>3072                                                              | 44,774.20  | 100.00% | 3 | 3 | 3 | 0.03% | 12.70% | LEDPHV 2.36<br>DIIR                       | 1,206.65 |

|         |      |                                                                                                            |                                                                                                |           |         |   |   |    |       |        |                                            |      |          |
|---------|------|------------------------------------------------------------------------------------------------------------|------------------------------------------------------------------------------------------------|-----------|---------|---|---|----|-------|--------|--------------------------------------------|------|----------|
| Control | 6006 | TMEM43 protein                                                                                             | gi 151556045,gi 156523072                                                                      | 44,774.20 | 100.00% | 3 | 3 | 3  | 0.03% | 12.70% | VSFSYA<br>GLSSDD<br>PDLGPA<br>HVVTVI<br>AR | 3.43 | 2,673.35 |
| Control | 6006 | Myeloid-associated differentiation marker                                                                  | gi 111308557,gi 115497460                                                                      | 35,291.10 | 100.00% | 3 | 5 | 11 | 0.12% | 14.60% | ARPGEIT<br>GYMATV<br>PGLLK                 | 4.83 | 1,890.02 |
| Control | 6006 | Myeloid-associated differentiation marker                                                                  | gi 111308557,gi 115497460                                                                      | 35,291.10 | 100.00% | 3 | 5 | 11 | 0.12% | 14.60% | LVFVRV                                     | 1.79 | 732.4766 |
| Control | 6006 | Myeloid-associated differentiation marker                                                                  | gi 111308557,gi 115497460                                                                      | 35,291.10 | 100.00% | 3 | 5 | 11 | 0.12% | 14.60% | TTVTTT<br>MSSSSG<br>LGSPDIV<br>GSPR        | 4.57 | 2,240.11 |
| Control | 6006 | ribosomal protein L24                                                                                      | gi 27806129,gi 28189314,gi 28189753,gi 28189757,gi 28189765,gi 3132823,gi 41019240,gi 74267598 | 17,630.30 | 99.80%  | 2 | 2 | 2  | 0.02% | 16.00% | AITGASL<br>ADIMAK                          | 3.66 | 1,277.68 |
| Control | 6006 | ribosomal protein L24                                                                                      | gi 27806129,gi 28189314,gi 28189753,gi 28189757,gi 28189765,gi 3132823,gi 41019240,gi 74267598 | 17,630.30 | 99.80%  | 2 | 2 | 2  | 0.02% | 16.00% | TDGKVF<br>QFLNAK                           | 3.43 | 1,367.73 |
| Control | 6006 | PREDICTED: similar to Keratin 10 (epidermolytic hyperkeratosis; keratosis palmaris et plantaris) isoform 2 | gi 194685481,gi 194685483                                                                      | 54,832.90 | 100.00% | 7 | 8 | 12 | 0.13% | 14.10% | DAEAWF<br>NEK                              | 2.58 | 1,109.49 |

|         |      |                                                                                                                                              |           |         |   |   |    |       |        |                |      |          |
|---------|------|----------------------------------------------------------------------------------------------------------------------------------------------|-----------|---------|---|---|----|-------|--------|----------------|------|----------|
| Control | 6006 | PREDIC TED: gi 1946854 81.gi 19468 similar to 5483<br>Keratin 10 (epiderm olytic hyperkera tosis; keratosis palmaris et plantaris) isoform 2 | 54,832.90 | 100.00% | 7 | 8 | 12 | 0.13% | 14.10% | IRLENEI QTYR   | 4.51 | 1,434.77 |
| Control | 6006 | PREDIC TED: gi 1946854 81.gi 19468 similar to 5483<br>Keratin 10 (epiderm olytic hyperkera tosis; keratosis palmaris et plantaris) isoform 2 | 54,832.90 | 100.00% | 7 | 8 | 12 | 0.13% | 14.10% | LASYLD KVR     | 3.24 | 1,064.61 |
| Control | 6006 | PREDIC TED: gi 1946854 81.gi 19468 similar to 5483<br>Keratin 10 (epiderm olytic hyperkera tosis; keratosis palmaris et plantaris) isoform 2 | 54,832.90 | 100.00% | 7 | 8 | 12 | 0.13% | 14.10% | QSLEASL AETEGR | 4.32 | 1,390.68 |
| Control | 6006 | PREDIC TED: gi 1946854 81.gi 19468 similar to 5483<br>Keratin 10 (epiderm olytic hyperkera tosis; keratosis palmaris et plantaris) isoform 2 | 54,832.90 | 100.00% | 7 | 8 | 12 | 0.13% | 14.10% | QSVEADI NGLRR  | 1.62 | 1,357.72 |
| Control | 6006 | PREDIC TED: gi 1946854 81.gi 19468 similar to 5483<br>Keratin 10 (epiderm olytic hyperkera tosis; keratosis palmaris et plantaris) isoform 2 | 54,832.90 | 100.00% | 7 | 8 | 12 | 0.13% | 14.10% | RVLDEL TLTK    | 3.14 | 1,187.70 |

|         |      |                                                                                                                                          |                           |           |         |   |   |     |       |        |                                                               |      |          |
|---------|------|------------------------------------------------------------------------------------------------------------------------------------------|---------------------------|-----------|---------|---|---|-----|-------|--------|---------------------------------------------------------------|------|----------|
| Control | 6006 | PREDICTED:<br>similar to<br>Keratin<br>10<br>(epidermolytic<br>hyperkeratosis;<br>keratosis<br>palmaris<br>et<br>plantaris)<br>isoform 2 | gi 194685481.gi 194685481 | 54,832.90 | 100.00% | 7 | 8 | 12  | 0.13% | 14.10% | SQYEQL<br>AEKNR                                               | 3.56 | 1,365.68 |
| Control | 6006 | PREDICTED:<br>similar to<br>Keratin<br>10<br>(epidermolytic<br>hyperkeratosis;<br>keratosis<br>palmaris<br>et<br>plantaris)<br>isoform 2 | gi 194685481.gi 194685481 | 54,832.90 | 100.00% | 7 | 8 | 12  | 0.13% | 14.10% | VLDELT<br>LTK                                                 | 3.63 | 1,031.60 |
| Control | 6006 | MATR3<br>protein                                                                                                                         | gi 134024643.gi 156523084 | 93,810.30 | 100.00% | 5 | 5 | 5   | 0.05% | 11.40% | DLDELS<br>RYPEDKI<br>TPENLP<br>QILLQLK                        | 3.32 | 3,080.65 |
| Control | 6006 | MATR3<br>protein                                                                                                                         | gi 134024643.gi 156523084 | 93,810.30 | 100.00% | 5 | 5 | 5   | 0.05% | 11.40% | DSFDDDR<br>GPSLNP<br>VLDYDH<br>GSR                            | 3.3  | 2,362.07 |
| Control | 6006 | MATR3<br>protein                                                                                                                         | gi 134024643.gi 156523084 | 93,810.30 | 100.00% | 5 | 5 | 5   | 0.05% | 11.40% | VIHLSNL<br>PHSGYS<br>DSAVLK                                   | 3.12 | 2,037.08 |
| Control | 6006 | MATR3<br>protein                                                                                                                         | gi 134024643.gi 156523084 | 93,810.30 | 100.00% | 5 | 5 | 5   | 0.05% | 11.40% | VVHIMD<br>FQR                                                 | 2.8  | 1,160.59 |
| Control | 6006 | MATR3<br>protein                                                                                                                         | gi 134024643.gi 156523084 | 93,810.30 | 100.00% | 5 | 5 | 5   | 0.05% | 11.40% | YQLLQL<br>VEPFGVI<br>SNHLILN<br>K                             | 3.15 | 2,438.38 |
| Control | 6006 | Transfer<br>in                                                                                                                           | gi 113911795.gi 114326282 | 77,721.80 | 100.00% | 6 | 8 | 102 | 1.11% | 16.80% | AINNEA<br>DAVTLD<br>GGLVYE<br>AGLKPN<br>NLKPVV<br>AEFHGT<br>K | 3.46 | 3,952.05 |
| Control | 6006 | Transfer<br>in                                                                                                                           | gi 113911795.gi 114326282 | 77,721.80 | 100.00% | 6 | 8 | 102 | 1.11% | 16.80% | GEADAM<br>SLDGGY<br>LYIAGK                                    | 3.06 | 1,846.85 |
| Control | 6006 | Transfer<br>in                                                                                                                           | gi 113911795.gi 114326282 | 77,721.80 | 100.00% | 6 | 8 | 102 | 1.11% | 16.80% | MDFELY<br>LGYEYV<br>TALQNL<br>R                               | 4.77 | 2,338.14 |
| Control | 6006 | Transfer<br>in                                                                                                                           | gi 113911795.gi 114326282 | 77,721.80 | 100.00% | 6 | 8 | 102 | 1.11% | 16.80% | TVGGKE<br>DVIWEL<br>LNHAQE<br>HFGK                            | 3.91 | 2,507.27 |
| Control | 6006 | Transfer<br>in                                                                                                                           | gi 113911795.gi 114326282 | 77,721.80 | 100.00% | 6 | 8 | 102 | 1.11% | 16.80% | TYDSYL<br>GDDYVR                                              | 2.9  | 1,466.64 |

|         |      |                                                                          |                                                 |           |         |   |   |     |       |        |                                         |          |
|---------|------|--------------------------------------------------------------------------|-------------------------------------------------|-----------|---------|---|---|-----|-------|--------|-----------------------------------------|----------|
| Control | 6006 | Transferrin                                                              | gi 113911795,gi 114326282                       | 77,721.80 | 100.00% | 6 | 8 | 102 | 1.11% | 16.80% | YYGYTG 2.53<br>AFR                      | 1,097.51 |
| Control | 6006 | Mannose-6-phosphate receptor (cation dependent)                          | gi 111308551,gi 119936494,gi 127292,gi 28461185 | 31,183.50 | 100.00% | 4 | 7 | 8   | 0.09% | 19.70% | GVGDDQ 2.98<br>LGEESEE<br>RDDHLL<br>PM  | 2,357.02 |
| Control | 6006 | Mannose-6-phosphate receptor (cation dependent)                          | gi 111308551,gi 119936494,gi 127292,gi 28461185 | 31,183.50 | 100.00% | 4 | 7 | 8   | 0.09% | 19.70% | HTLADN 4.37<br>FNPVSEE<br>R             | 1,628.77 |
| Control | 6006 | Mannose-6-phosphate receptor (cation dependent)                          | gi 111308551,gi 119936494,gi 127292,gi 28461185 | 31,183.50 | 100.00% | 4 | 7 | 8   | 0.09% | 19.70% | HTLADN 2.98<br>FNPVSEE<br>RGK           | 1,813.88 |
| Control | 6006 | Mannose-6-phosphate receptor (cation dependent)                          | gi 111308551,gi 119936494,gi 127292,gi 28461185 | 31,183.50 | 100.00% | 4 | 7 | 8   | 0.09% | 19.70% | SFESTVG 4.1<br>QSPDMY<br>SYVFR          | 2,115.93 |
| Control | 6006 | ADP-ribosylation-like factor 6 interacting protein 5                     | gi 59858163,gi 62460474,gi 74354855,gi 75057806 | 21,648.60 | 99.80%  | 2 | 3 | 4   | 0.04% | 13.80% | FARPDF 1.73<br>R                        | 908.4737 |
| Control | 6006 | ADP-ribosylation-like factor 6 interacting protein 5                     | gi 59858163,gi 62460474,gi 74354855,gi 75057806 | 21,648.60 | 99.80%  | 2 | 3 | 4   | 0.04% | 13.80% | TPMGIV 3.61<br>LDALEQ<br>QEETITK        | 2,132.08 |
| Control | 6006 | Heterogeneous nuclear ribonucleoprotein U (scaffold attachment factor A) | gi 124828988,gi 125991756                       | 90,435.30 | 100.00% | 5 | 5 | 7   | 0.08% | 12.50% | EKPYFPI 3.98<br>PEDYTFI<br>QNVPLE<br>DR | 2,710.34 |
| Control | 6006 | Heterogeneous nuclear ribonucleoprotein U (scaffold attachment factor A) | gi 124828988,gi 125991756                       | 90,435.30 | 100.00% | 5 | 5 | 7   | 0.08% | 12.50% | KAEVEG 3.66<br>KDLPEH<br>AVLK           | 1,762.97 |

|         |      |                                                                          |                                        |           |         |   |   |   |       |        |                                                      |      |          |
|---------|------|--------------------------------------------------------------------------|----------------------------------------|-----------|---------|---|---|---|-------|--------|------------------------------------------------------|------|----------|
| Control | 6006 | Heterogeneous nuclear ribonucleoprotein U (scaffold attachment factor A) | gi 124828988,gi 125991756              | 90,435.30 | 100.00% | 5 | 5 | 7 | 0.08% | 12.50% | LQAALD<br>DEEAGG<br>RPAMEP<br>GNGSLD<br>LGGDSA<br>GR | 5.39 | 3,142.43 |
| Control | 6006 | Heterogeneous nuclear ribonucleoprotein U (scaffold attachment factor A) | gi 124828988,gi 125991756              | 90,435.30 | 100.00% | 5 | 5 | 7 | 0.08% | 12.50% | NFILDQT<br>NVSAAA<br>QR                              | 3.44 | 1,647.84 |
| Control | 6006 | Heterogeneous nuclear ribonucleoprotein U (scaffold attachment factor A) | gi 124828988,gi 125991756              | 90,435.30 | 100.00% | 5 | 5 | 7 | 0.08% | 12.50% | SSGPTSL<br>FAVTVA<br>PPGAR                           | 2.47 | 1,714.91 |
| Control | 6006 | Ectonucleotide pyrophosphatase/hosphodiesterase 4 (putative function)    | gi 124829038,gi 125630707,gi 171769867 | 51,147.90 | 100.00% | 3 | 3 | 3 | 0.03% | 9.27%  | ADYLQN<br>YEFPHL<br>QNFIK                            | 2.48 | 2,140.05 |
| Control | 6006 | Ectonucleotide pyrophosphatase/hosphodiesterase 4 (putative function)    | gi 124829038,gi 125630707,gi 171769867 | 51,147.90 | 100.00% | 3 | 3 | 3 | 0.03% | 9.27%  | LLVVSFD<br>GFR                                       | 2.7  | 1,166.66 |
| Control | 6006 | Ectonucleotide pyrophosphatase/hosphodiesterase 4 (putative function)    | gi 124829038,gi 125630707,gi 171769867 | 51,147.90 | 100.00% | 3 | 3 | 3 | 0.03% | 9.27%  | VLEEIDE<br>HIGELV<br>HR                              | 2.36 | 1,787.93 |
| Control | 6006 | DPYSL3 protein                                                           | gi 154426078,gi 155371867              | 73,970.90 | 100.00% | 3 | 3 | 3 | 0.03% | 7.89%  | EESREPA<br>PASPAPA<br>GVEIR                          | 3.46 | 1,962.99 |
| Control | 6006 | DPYSL3 protein                                                           | gi 154426078,gi 155371867              | 73,970.90 | 100.00% | 3 | 3 | 3 | 0.03% | 7.89%  | IMLEDG<br>NLHVTQ<br>GAGR                             | 2.59 | 1,726.85 |
| Control | 6006 | DPYSL3 protein                                                           | gi 154426078,gi 155371867              | 73,970.90 | 100.00% | 3 | 3 | 3 | 0.03% | 7.89%  | NLHQSG<br>FSLSGTQ<br>VDEGVR                          | 3.27 | 2,030.99 |

|         |      |                                                                                                           |                                                                                                                                                         |           |         |   |    |    |       |        |                                               |      |          |
|---------|------|-----------------------------------------------------------------------------------------------------------|---------------------------------------------------------------------------------------------------------------------------------------------------------|-----------|---------|---|----|----|-------|--------|-----------------------------------------------|------|----------|
| Control | 6006 | RecName<br>:<br>Full=AT<br>P<br>synthase<br>subunit<br>beta,<br>mitochon<br>drial;<br>Flags:<br>Precursor | gi 114543.g<br>i 15842902<br>3,gi 158429<br>024,gi 1584<br>29025,gi 15<br>8431069,gi <br>158431070,<br>gi 1584310<br>71,gi 28461<br>221,gi 9457<br>4271 | 51,687.60 | 100.00% | 8 | 11 | 36 | 0.39% | 30.30% | AIAELGI<br>YPAVDP<br>LDSTSR                   | 3.17 | 1,988.03 |
| Control | 6006 | RecName<br>:<br>Full=AT<br>P<br>synthase<br>subunit<br>beta,<br>mitochon<br>drial;<br>Flags:<br>Precursor | gi 114543.g<br>i 15842902<br>3,gi 158429<br>024,gi 1584<br>29025,gi 15<br>8431069,gi <br>158431070,<br>gi 1584310<br>71,gi 28461<br>221,gi 9457<br>4271 | 51,687.60 | 100.00% | 8 | 11 | 36 | 0.39% | 30.30% | FTQAGS<br>EVSALL<br>GR                        | 3.82 | 1,435.75 |
| Control | 6006 | RecName<br>:<br>Full=AT<br>P<br>synthase<br>subunit<br>beta,<br>mitochon<br>drial;<br>Flags:<br>Precursor | gi 114543.g<br>i 15842902<br>3,gi 158429<br>024,gi 1584<br>29025,gi 15<br>8431069,gi <br>158431070,<br>gi 1584310<br>71,gi 28461<br>221,gi 9457<br>4271 | 51,687.60 | 100.00% | 8 | 11 | 36 | 0.39% | 30.30% | IMDPNIV<br>GSEHYD<br>VAR                      | 2.8  | 1,831.86 |
| Control | 6006 | RecName<br>:<br>Full=AT<br>P<br>synthase<br>subunit<br>beta,<br>mitochon<br>drial;<br>Flags:<br>Precursor | gi 114543.g<br>i 15842902<br>3,gi 158429<br>024,gi 1584<br>29025,gi 15<br>8431069,gi <br>158431070,<br>gi 1584310<br>71,gi 28461<br>221,gi 9457<br>4271 | 51,687.60 | 100.00% | 8 | 11 | 36 | 0.39% | 30.30% | IVAVIGA<br>VVDVQF<br>DEGLPPI<br>LNALEV<br>QGR | 4.36 | 3,031.68 |
| Control | 6006 | RecName<br>:<br>Full=AT<br>P<br>synthase<br>subunit<br>beta,<br>mitochon<br>drial;<br>Flags:<br>Precursor | gi 114543.g<br>i 15842902<br>3,gi 158429<br>024,gi 1584<br>29025,gi 15<br>8431069,gi <br>158431070,<br>gi 1584310<br>71,gi 28461<br>221,gi 9457<br>4271 | 51,687.60 | 100.00% | 8 | 11 | 36 | 0.39% | 30.30% | SLQDIIAI<br>LGMDEL<br>SEEDKL<br>TVSR          | 3.77 | 2,691.38 |

|         |      |                                                                                                           |                                                                                                                                                         |            |         |   |    |    |       |        |                                              |      |          |
|---------|------|-----------------------------------------------------------------------------------------------------------|---------------------------------------------------------------------------------------------------------------------------------------------------------|------------|---------|---|----|----|-------|--------|----------------------------------------------|------|----------|
| Control | 6006 | RecName<br>:<br>Full=AT<br>P<br>synthase<br>subunit<br>beta,<br>mitochon<br>drial;<br>Flags:<br>Precursor | gi 114543,g<br>i 15842902<br>3,gi 158429<br>024,gi 1584<br>29025,gi 15<br>8431069,gi <br>158431070,<br>gi 1584310<br>71,gi 28461<br>221,gi 9457<br>4271 | 51,687.60  | 100.00% | 8 | 11 | 36 | 0.39% | 30.30% | TIAMDG<br>TEGLVR                             | 3.24 | 1,278.64 |
| Control | 6006 | RecName<br>:<br>Full=AT<br>P<br>synthase<br>subunit<br>beta,<br>mitochon<br>drial;<br>Flags:<br>Precursor | gi 114543,g<br>i 15842902<br>3,gi 158429<br>024,gi 1584<br>29025,gi 15<br>8431069,gi <br>158431070,<br>gi 1584310<br>71,gi 28461<br>221,gi 9457<br>4271 | 51,687.60  | 100.00% | 8 | 11 | 36 | 0.39% | 30.30% | TVLIMEL<br>INNVAK                            | 2.46 | 1,473.83 |
| Control | 6006 | RecName<br>:<br>Full=AT<br>P<br>synthase<br>subunit<br>beta,<br>mitochon<br>drial;<br>Flags:<br>Precursor | gi 114543,g<br>i 15842902<br>3,gi 158429<br>024,gi 1584<br>29025,gi 15<br>8431069,gi <br>158431070,<br>gi 1584310<br>71,gi 28461<br>221,gi 9457<br>4271 | 51,687.60  | 100.00% | 8 | 11 | 36 | 0.39% | 30.30% | VLDSGA<br>PIRIPVG<br>PETLGR                  | 3.62 | 1,947.10 |
| Control | 6006 | RecName<br>:<br>Full=Sto<br>matin-<br>like<br>protein 2;<br>Short=SL<br>P-2                               | gi 1185738<br>93,gi 14874<br>5563,gi 816<br>74229,gi 84<br>000113<br>protein 2;<br>Short=SL<br>P-2                                                      | 38,715.70  | 99.80%  | 2 | 2  | 2  | 0.02% | 11.80% | QAQILAS<br>EAEKAE<br>QINQAA<br>GEASAV<br>LAK | 3.35 | 2,839.48 |
| Control | 6006 | RecName<br>:<br>Full=Sto<br>matin-<br>like<br>protein 2;<br>Short=SL<br>P-2                               | gi 1185738<br>93,gi 14874<br>5563,gi 816<br>74229,gi 84<br>000113<br>protein 2;<br>Short=SL<br>P-2                                                      | 38,715.70  | 99.80%  | 2 | 2  | 2  | 0.02% | 11.80% | STDASL<br>DEELDR<br>VK                       | 2.68 | 1,577.77 |
| Control | 6006 | PREDIC<br>TED:<br>similar to<br>CD109,<br>partial                                                         | gi 1199213<br>75<br>similar to<br>CD109,<br>partial                                                                                                     | 142,518.70 | 99.80%  | 2 | 3  | 3  | 0.03% | 3.29%  | LGEVPIT<br>VTAVSP<br>AASDAV<br>TQR           | 3.35 | 2,182.17 |
| Control | 6006 | PREDIC<br>TED:<br>similar to<br>CD109,<br>partial                                                         | gi 1199213<br>75<br>similar to<br>CD109,<br>partial                                                                                                     | 142,518.70 | 99.80%  | 2 | 3  | 3  | 0.03% | 3.29%  | SYSQSIL<br>LDLTDS<br>TLQTTL<br>K             | 3.02 | 2,227.17 |



|         |      |                                                                 |                                        |            |         |   |   |   |       |        |                                                     |          |
|---------|------|-----------------------------------------------------------------|----------------------------------------|------------|---------|---|---|---|-------|--------|-----------------------------------------------------|----------|
| Control | 6006 | tyrosine kinase with immunoglobulin-like and EGF-like domains 1 | gi 27806793,gi 296576,gi 730944        | 124,936.20 | 99.80%  | 2 | 2 | 2 | 0.02% | 1.85%  | NVLVGE 2.58<br>NLASK                                | 1,143.64 |
| Control | 6006 | tyrosine kinase with immunoglobulin-like and EGF-like domains 1 | gi 27806793,gi 296576,gi 730944        | 124,936.20 | 99.80%  | 2 | 2 | 2 | 0.02% | 1.85%  | VLETDP 2.78<br>AFAR                                 | 1,118.58 |
| Control | 6006 | SSR1 protein                                                    | gi 151553610,gi 156120891,gi 187611488 | 32,036.80  | 99.80%  | 2 | 2 | 3 | 0.03% | 6.64%  | FLVGFT 2.58<br>NK                                   | 925.5142 |
| Control | 6006 | SSR1 protein                                                    | gi 151553610,gi 156120891,gi 187611488 | 32,036.80  | 99.80%  | 2 | 2 | 3 | 0.03% | 6.64%  | GEDFPA 3.25<br>NNIVK                                | 1,203.60 |
| Control | 6006 | EH-domain containin g 2                                         | gi 114051716,gi 86822020               | 61,201.30  | 100.00% | 7 | 7 | 8 | 0.09% | 18.60% | FGTFHSP 4.99<br>ALEDAD<br>FDGKPM<br>VLVAGQ<br>YSTGK | 3,201.52 |
| Control | 6006 | EH-domain containin g 2                                         | gi 114051716,gi 86822020               | 61,201.30  | 100.00% | 7 | 7 | 8 | 0.09% | 18.60% | GYDFPA 2.13<br>VLR                                  | 1,037.54 |
| Control | 6006 | EH-domain containin g 2                                         | gi 114051716,gi 86822020               | 61,201.30  | 100.00% | 7 | 7 | 8 | 0.09% | 18.60% | KLNPFG 4.51<br>NTFLNR                               | 1,420.77 |
| Control | 6006 | EH-domain containin g 2                                         | gi 114051716,gi 86822020               | 61,201.30  | 100.00% | 7 | 7 | 8 | 0.09% | 18.60% | LFELEEQ 3.18<br>DLFR                                | 1,438.72 |
| Control | 6006 | EH-domain containin g 2                                         | gi 114051716,gi 86822020               | 61,201.30  | 100.00% | 7 | 7 | 8 | 0.09% | 18.60% | LFELEEQ 4.02<br>DLFRDIQ<br>GLPR                     | 2,218.15 |
| Control | 6006 | EH-domain containin g 2                                         | gi 114051716,gi 86822020               | 61,201.30  | 100.00% | 7 | 7 | 8 | 0.09% | 18.60% | SKYDEIF 3.33<br>YNLAPA<br>DGK                       | 1,830.89 |
| Control | 6006 | EH-domain containin g 2                                         | gi 114051716,gi 86822020               | 61,201.30  | 100.00% | 7 | 7 | 8 | 0.09% | 18.60% | TSFIQYL 3.84<br>LEQVVP<br>GSR                       | 1,866.96 |
| Control | 6006 | GTP-binding protein MX2                                         | gi 13430404,gi 27806835,gi 75066885    | 81,436.40  | 100.00% | 3 | 3 | 3 | 0.03% | 8.87%  | ALGVEQ 3.22<br>DLALPAI<br>AVIGDQ<br>SSGK            | 2,252.21 |
| Control | 6006 | GTP-binding protein MX2                                         | gi 13430404,gi 27806835,gi 75066885    | 81,436.40  | 100.00% | 3 | 3 | 3 | 0.03% | 8.87%  | ATEELQ 2.64<br>QYGDDI<br>PSDEGD<br>KMFFLIE<br>K     | 3,034.39 |
| Control | 6006 | GTP-binding protein MX2                                         | gi 13430404,gi 27806835,gi 75066885    | 81,436.40  | 100.00% | 3 | 3 | 3 | 0.03% | 8.87%  | SSVLEAL 4.6<br>SGVALP<br>R                          | 1,398.80 |

|         |      |                                                                                                                                     |           |         |    |    |    |       |        |                                      |      |          |
|---------|------|-------------------------------------------------------------------------------------------------------------------------------------|-----------|---------|----|----|----|-------|--------|--------------------------------------|------|----------|
| Control | 6006 | coiled-coil-helix-9,gi 5985833<br>coiled-coil-helix-70,gi 74354<br>coiled-coil-helix-006,gi 7836<br>domain 5273<br>containin<br>g 3 | 26,082.40 | 100.00% | 7  | 10 | 10 | 0.11% | 33.50% | ELDAEK<br>AFANEQ<br>LTR              | 3.18 | 1,734.87 |
| Control | 6006 | coiled-coil-helix-9,gi 5985833<br>coiled-coil-helix-70,gi 74354<br>coiled-coil-helix-006,gi 7836<br>domain 5273<br>containin<br>g 3 | 26,082.40 | 100.00% | 7  | 10 | 10 | 0.11% | 33.50% | KQDAFY<br>KEQLAR                     | 4.45 | 1,496.79 |
| Control | 6006 | coiled-coil-helix-9,gi 5985833<br>coiled-coil-helix-70,gi 74354<br>coiled-coil-helix-006,gi 7836<br>domain 5273<br>containin<br>g 3 | 26,082.40 | 100.00% | 7  | 10 | 10 | 0.11% | 33.50% | LSENVID<br>RMKETS<br>PSGPK           | 3.7  | 2,004.01 |
| Control | 6006 | coiled-coil-helix-9,gi 5985833<br>coiled-coil-helix-70,gi 74354<br>coiled-coil-helix-006,gi 7836<br>domain 5273<br>containin<br>g 3 | 26,082.40 | 100.00% | 7  | 10 | 10 | 0.11% | 33.50% | QNTQQT<br>LSCSAL<br>ASQYMR           | 3.42 | 2,045.94 |
| Control | 6006 | coiled-coil-helix-9,gi 5985833<br>coiled-coil-helix-70,gi 74354<br>coiled-coil-helix-006,gi 7836<br>domain 5273<br>containin<br>g 3 | 26,082.40 | 100.00% | 7  | 10 | 10 | 0.11% | 33.50% | RVAEEL<br>ALEQAK<br>K                | 4.65 | 1,484.84 |
| Control | 6006 | coiled-coil-helix-9,gi 5985833<br>coiled-coil-helix-70,gi 74354<br>coiled-coil-helix-006,gi 7836<br>domain 5273<br>containin<br>g 3 | 26,082.40 | 100.00% | 7  | 10 | 10 | 0.11% | 33.50% | VAEELA<br>LEQAK                      | 3.21 | 1,200.65 |
| Control | 6006 | coiled-coil-helix-9,gi 5985833<br>coiled-coil-helix-70,gi 74354<br>coiled-coil-helix-006,gi 7836<br>domain 5273<br>containin<br>g 3 | 26,082.40 | 100.00% | 7  | 10 | 10 | 0.11% | 33.50% | VAEELA<br>LEQAKK                     | 4.15 | 1,328.74 |
| Control | 6006 | integrin beta 1<br>gi 1111831<br>55,gi 21856<br>3327                                                                                | 88,051.70 | 100.00% | 11 | 17 | 27 | 0.29% | 15.80% | GTAEKL<br>QPEDITQ<br>IQPQQLV<br>LQLR | 3.87 | 2,746.51 |
| Control | 6006 | integrin beta 1<br>gi 1111831<br>55,gi 21856<br>3327                                                                                | 88,051.70 | 100.00% | 11 | 17 | 27 | 0.29% | 15.80% | IGFGSFV<br>EK                        | 2.48 | 983.5197 |
| Control | 6006 | integrin beta 1<br>gi 1111831<br>55,gi 21856<br>3327                                                                                | 88,051.70 | 100.00% | 11 | 17 | 27 | 0.29% | 15.80% | LLVFSTD<br>AGFHFA<br>GDGK            | 4.23 | 1,781.89 |
| Control | 6006 | integrin beta 1<br>gi 1111831<br>55,gi 21856<br>3327                                                                                | 88,051.70 | 100.00% | 11 | 17 | 27 | 0.29% | 15.80% | LPEGVTI<br>NYK                       | 3.09 | 1,133.62 |
| Control | 6006 | integrin beta 1<br>gi 1111831<br>55,gi 21856<br>3327                                                                                | 88,051.70 | 100.00% | 11 | 17 | 27 | 0.29% | 15.80% | LQPEDIT<br>QIQPQQL<br>VLQLR          | 5.01 | 2,260.27 |
| Control | 6006 | integrin beta 1<br>gi 1111831<br>55,gi 21856<br>3327                                                                                | 88,051.70 | 100.00% | 11 | 17 | 27 | 0.29% | 15.80% | LSENNIQ<br>TIFAVTE<br>EFQPVY<br>K    | 3.84 | 2,470.25 |

|         |      |                                                                                          |                                       |           |         |    |    |    |       |        |                                             |          |
|---------|------|------------------------------------------------------------------------------------------|---------------------------------------|-----------|---------|----|----|----|-------|--------|---------------------------------------------|----------|
| Control | 6006 | integrin<br>beta 1                                                                       | gi 1111831<br>55,gi 21856<br>3327     | 88,051.70 | 100.00% | 11 | 17 | 27 | 0.29% | 15.80% | LSENNIQ 3.05<br>TIFAVTE<br>EFQPVY<br>KELK   | 2,840.47 |
| Control | 6006 | integrin<br>beta 1                                                                       | gi 1111831<br>55,gi 21856<br>3327     | 88,051.70 | 100.00% | 11 | 17 | 27 | 0.29% | 15.80% | NVLSLT 4.64<br>DKGEVF<br>NELVGK             | 1,962.05 |
| Control | 6006 | integrin<br>beta 1                                                                       | gi 1111831<br>55,gi 21856<br>3327     | 88,051.70 | 100.00% | 11 | 17 | 27 | 0.29% | 15.80% | SGEPQTF 2.24<br>TLK                         | 1,107.57 |
| Control | 6006 | integrin<br>beta 1                                                                       | gi 1111831<br>55,gi 21856<br>3327     | 88,051.70 | 100.00% | 11 | 17 | 27 | 0.29% | 15.80% | SKGTAE 2.72<br>KLQPEDI<br>TQIQPQQ<br>LVLQLR | 2,961.64 |
| Control | 6006 | integrin<br>beta 1                                                                       | gi 1111831<br>55,gi 21856<br>3327     | 88,051.70 | 100.00% | 11 | 17 | 27 | 0.29% | 15.80% | TVMPYI 3.01<br>STTPAK                       | 1,324.68 |
| Control | 6006 | RecName<br>:<br>Full=Thy<br>mopoieti<br>n-2;<br>AltName:<br>Full=Thy<br>mopoieti<br>n II | gi 135801,g<br>i 135803,gi <br>226446 | 5,620.60  | 99.80%  | 2  | 2  | 2  | 0.02% | 67.30% | LKSELV 3.39<br>ANNVTL<br>PAGEQR             | 1,939.06 |
| Control | 6006 | RecName<br>:<br>Full=Thy<br>mopoieti<br>n-2;<br>AltName:<br>Full=Thy<br>mopoieti<br>n II | gi 135801,g<br>i 135803,gi <br>226446 | 5,620.60  | 99.80%  | 2  | 2  | 2  | 0.02% | 67.30% | LKSELV 3.92<br>ANNVTL<br>PAGEQR<br>K        | 2,067.16 |
| Control | 6006 | RecName<br>:<br>Full=Thy<br>mopoieti<br>n-2;<br>AltName:<br>Full=Thy<br>mopoieti<br>n II | gi 135801,g<br>i 135803,gi <br>226446 | 5,620.60  | 99.80%  | 2  | 2  | 2  | 0.02% | 67.30% | PEFLEDP 3.06<br>SVLTK                       | 1,374.72 |
| Control | 6006 | RecName<br>:<br>Full=Thy<br>mopoieti<br>n-2;<br>AltName:<br>Full=Thy<br>mopoieti<br>n II | gi 135801,g<br>i 135803,gi <br>226446 | 5,620.60  | 99.80%  | 2  | 2  | 2  | 0.02% | 67.30% | PEFLEDP 3.61<br>SVLTKE<br>K                 | 1,631.85 |
| Control | 6006 | TPM3<br>protein                                                                          | gi 7915347<br>2                       | 29,015.30 | 99.80%  | 2  | 2  | 2  | 0.02% | 12.10% | HIAEEAD 3.16<br>RKYEEV<br>AR                | 1,815.90 |
| Control | 6006 | TPM3<br>protein                                                                          | gi 7915347<br>2                       | 29,015.30 | 99.80%  | 2  | 2  | 2  | 0.02% | 12.10% | RIQLVEE 3.55<br>ELDRAQ<br>ER                | 1,883.99 |

|         |      |                                                                                                                                                                                                                                                                |           |         |   |   |   |       |        |                            |          |
|---------|------|----------------------------------------------------------------------------------------------------------------------------------------------------------------------------------------------------------------------------------------------------------------|-----------|---------|---|---|---|-------|--------|----------------------------|----------|
| Control | 6006 | RecName gi 1312445 :<br>2,gi 148878<br>Full=Volt 077,gi 2780<br>age- 7415,gi 881<br>dependen 0224<br>t anion-<br>selective<br>channel<br>protein 3;<br>Short=V<br>DAC-3;<br>AltName:<br>Full=Out<br>er<br>mitochon<br>drial<br>membran<br>e protein<br>porin 3 | 30,853.30 | 100.00% | 5 | 6 | 7 | 0.08% | 20.40% | DVFNKG 2.47<br>YGFGMV<br>K | 1,477.71 |
| Control | 6006 | RecName gi 1312445 :<br>2,gi 148878<br>Full=Volt 077,gi 2780<br>age- 7415,gi 881<br>dependen 0224<br>t anion-<br>selective<br>channel<br>protein 3;<br>Short=V<br>DAC-3;<br>AltName:<br>Full=Out<br>er<br>mitochon<br>drial<br>membran<br>e protein<br>porin 3 | 30,853.30 | 100.00% | 5 | 6 | 7 | 0.08% | 20.40% | LSQNNF 2.52<br>ALGYK       | 1,254.65 |
| Control | 6006 | RecName gi 1312445 :<br>2,gi 148878<br>Full=Volt 077,gi 2780<br>age- 7415,gi 881<br>dependen 0224<br>t anion-<br>selective<br>channel<br>protein 3;<br>Short=V<br>DAC-3;<br>AltName:<br>Full=Out<br>er<br>mitochon<br>drial<br>membran<br>e protein<br>porin 3 | 30,853.30 | 100.00% | 5 | 6 | 7 | 0.08% | 20.40% | LTLDTIF 2.9<br>VPNTGK<br>K | 1,546.88 |

|         |      |                                                                                                                                                                                                                                                                |                         |         |   |   |    |       |        |                            |      |          |
|---------|------|----------------------------------------------------------------------------------------------------------------------------------------------------------------------------------------------------------------------------------------------------------------|-------------------------|---------|---|---|----|-------|--------|----------------------------|------|----------|
| Control | 6006 | RecName gi 1312445 :<br>2,gi 148878<br>Full=Volt 077,gi 2780<br>age- 7415,gi 881<br>dependen 0224<br>t anion-<br>selective<br>channel<br>protein 3;<br>Short=V<br>DAC-3;<br>AltName:<br>Full=Out<br>er<br>mitochon<br>drial<br>membran<br>e protein<br>porin 3 | 30,853.30               | 100.00% | 5 | 6 | 7  | 0.08% | 20.40% | LTLSALI<br>DGK             | 3.04 | 1,030.61 |
| Control | 6006 | RecName gi 1312445 :<br>2,gi 148878<br>Full=Volt 077,gi 2780<br>age- 7415,gi 881<br>dependen 0224<br>t anion-<br>selective<br>channel<br>protein 3;<br>Short=V<br>DAC-3;<br>AltName:<br>Full=Out<br>er<br>mitochon<br>drial<br>membran<br>e protein<br>porin 3 | 30,853.30               | 100.00% | 5 | 6 | 7  | 0.08% | 20.40% | LTLSALI<br>DGKNFN<br>AGGHK | 3.57 | 1,856.00 |
| Control | 6006 | RecName gi 1312445 :<br>2,gi 148878<br>Full=Volt 077,gi 2780<br>age- 7415,gi 881<br>dependen 0224<br>t anion-<br>selective<br>channel<br>protein 3;<br>Short=V<br>DAC-3;<br>AltName:<br>Full=Out<br>er<br>mitochon<br>drial<br>membran<br>e protein<br>porin 3 | 30,853.30               | 100.00% | 5 | 6 | 7  | 0.08% | 20.40% | SKLSQN<br>NFALGY<br>K      | 3.67 | 1,469.77 |
| Control | 6006 | SLC25A<br>3 protein 64                                                                                                                                                                                                                                         | gi 1515560<br>39,986.50 | 100.00% | 5 | 8 | 12 | 0.13% | 11.40% | IQTQPGY<br>ANTLR           | 3.96 | 1,361.72 |
| Control | 6006 | SLC25A<br>3 protein 64                                                                                                                                                                                                                                         | gi 1515560<br>39,986.50 | 100.00% | 5 | 8 | 12 | 0.13% | 11.40% | LPRPPPP<br>EMPESL<br>K     | 4.36 | 1,603.85 |

|         |      |                                                                                    |                                                                                      |           |         |   |   |    |       |        |                          |      |          |
|---------|------|------------------------------------------------------------------------------------|--------------------------------------------------------------------------------------|-----------|---------|---|---|----|-------|--------|--------------------------|------|----------|
| Control | 6006 | SLC25A3 protein                                                                    | gi 151556064                                                                         | 39,986.50 | 100.00% | 5 | 8 | 12 | 0.13% | 11.40% | LPRPPPP<br>EMPEL<br>KK   | 4.77 | 1,731.95 |
| Control | 6006 | SLC25A3 protein                                                                    | gi 151556064                                                                         | 39,986.50 | 100.00% | 5 | 8 | 12 | 0.13% | 11.40% | MYKEEG<br>LKAFYK         | 3.98 | 1,522.76 |
| Control | 6006 | SLC25A3 protein                                                                    | gi 151556064                                                                         | 39,986.50 | 100.00% | 5 | 8 | 12 | 0.13% | 11.40% | VRIQTQP<br>GYANTL<br>R   | 2.98 | 1,616.89 |
| Control | 6006 | FKBP8 protein                                                                      | gi 115545478,gi 119894476,gi 194668654                                               | 44,616.30 | 99.70%  | 2 | 2 | 2  | 0.02% | 7.52%  | TAVDGP<br>DLEMLT<br>GQER | 3.34 | 1,747.82 |
| Control | 6006 | FKBP8 protein                                                                      | gi 115545478,gi 119894476,gi 194668654                                               | 44,616.30 | 99.70%  | 2 | 2 | 2  | 0.02% | 7.52%  | VDMTFE<br>EEEQLL<br>QLK  | 2.28 | 1,867.90 |
| Control | 6006 | ALCAM/CD166                                                                        | gi 13111304,gi 41386784,gi 47605539                                                  | 64,749.10 | 99.80%  | 2 | 2 | 2  | 0.02% | 4.29%  | SSNTYT<br>LTDVKK         | 2.38 | 1,384.71 |
| Control | 6006 | ALCAM/CD166                                                                        | gi 13111304,gi 41386784,gi 47605539                                                  | 64,749.10 | 99.80%  | 2 | 2 | 2  | 0.02% | 4.29%  | VFKQPS<br>KPEIVSK        | 2.95 | 1,486.86 |
| Control | 6006 | Myxovirus (influenza virus) resistance 1, interferon-inducible protein p78 (mouse) | gi 109659140,gi 27806841,gi 28372116,gi 2920652,gi 3041,6232,gi 33111880,gi 68067472 | 75,368.60 | 100.00% | 3 | 4 | 4  | 0.04% | 6.30%  | GRELPG<br>FVNYK          | 3.29 | 1,279.68 |
| Control | 6006 | Myxovirus (influenza virus) resistance 1, interferon-inducible protein p78 (mouse) | gi 109659140,gi 27806841,gi 28372116,gi 2920652,gi 3041,6232,gi 33111880,gi 68067472 | 75,368.60 | 100.00% | 3 | 4 | 4  | 0.04% | 6.30%  | IEDIRLE<br>QENEAE<br>K   | 2.33 | 1,715.84 |
| Control | 6006 | Myxovirus (influenza virus) resistance 1, interferon-inducible protein p78 (mouse) | gi 109659140,gi 27806841,gi 28372116,gi 2920652,gi 3041,6232,gi 33111880,gi 68067472 | 75,368.60 | 100.00% | 3 | 4 | 4  | 0.04% | 6.30%  | SKIEDIR<br>LEQENE<br>AEK | 3.02 | 1,930.97 |
| Control | 6006 | Myxovirus (influenza virus) resistance 1, interferon-inducible protein p78 (mouse) | gi 109659140,gi 27806841,gi 28372116,gi 2920652,gi 3041,6232,gi 33111880,gi 68067472 | 75,368.60 | 100.00% | 3 | 4 | 4  | 0.04% | 6.30%  | SSVLEAL<br>SGVALP<br>R   | 4.6  | 1,398.80 |

|         |      |                                                                                                                                                |           |         |   |   |   |       |        |                                |          |
|---------|------|------------------------------------------------------------------------------------------------------------------------------------------------|-----------|---------|---|---|---|-------|--------|--------------------------------|----------|
| Control | 6006 | RecName gi 1220660 : 07.gi 28189 Full=40S ribosomal protein SA; AltName: Full=Laminin receptor 1; AltName: Full=p40; AltName: Full=Protein C10 | 18,591.70 | 100.00% | 3 | 4 | 4 | 0.04% | 22.20% | AIVAIEN 3.86<br>PADVSVI<br>SSR | 1,740.95 |
| Control | 6006 | RecName gi 1220660 : 07.gi 28189 Full=40S ribosomal protein SA; AltName: Full=Laminin receptor 1; AltName: Full=p40; AltName: Full=Protein C10 | 18,591.70 | 100.00% | 3 | 4 | 4 | 0.04% | 22.20% | FAAATG 3.81<br>ATPIAGR         | 1,203.65 |
| Control | 6006 | RecName gi 1220660 : 07.gi 28189 Full=40S ribosomal protein SA; AltName: Full=Laminin receptor 1; AltName: Full=p40; AltName: Full=Protein C10 | 18,591.70 | 100.00% | 3 | 4 | 4 | 0.04% | 22.20% | LLVVTD 2.49<br>PR              | 912.5514 |
| Control | 6006 | PREDIC TED: similar to ribosomal protein L7 gi 1199199 84.gi 61553 181.gi 6246 0552.gi 716 49267                                               | 29,053.70 | 100.00% | 4 | 4 | 4 | 0.04% | 16.90% | IALTDNA 3.88<br>LIAR           | 1,170.68 |

|         |      |                                                                        |            |           |         |   |   |   |       |        |                         |      |          |
|---------|------|------------------------------------------------------------------------|------------|-----------|---------|---|---|---|-------|--------|-------------------------|------|----------|
| Control | 6006 | PREDIC TED: 84,gi 61553 similar to 181,gi 6246 ribosomal protein L7    | gi 1199199 | 29,053.70 | 100.00% | 4 | 4 | 4 | 0.04% | 16.90% | KTTHFV EGGDAG NREDQI NR | 2.97 | 2,244.08 |
| Control | 6006 | PREDIC TED: 84,gi 61553 similar to 181,gi 6246 ribosomal protein L7    | gi 1199199 | 29,053.70 | 100.00% | 4 | 4 | 4 | 0.04% | 16.90% | KVPAVP ETLKK            | 3.29 | 1,209.76 |
| Control | 6006 | PREDIC TED: 84,gi 61553 similar to 181,gi 6246 ribosomal protein L7    | gi 1199199 | 29,053.70 | 100.00% | 4 | 4 | 4 | 0.04% | 16.90% | TTHFVE GGDAGN REDQIN R  | 2.33 | 2,115.98 |
| Control | 6006 | 90-kDa heat shock protein alpha                                        | gi 3439234 | 84,716.20 | 100.00% | 4 | 4 | 4 | 0.04% | 10.40% | ADLINNL GTIAK           | 3.47 | 1,242.71 |
| Control | 6006 | 90-kDa heat shock protein alpha                                        | gi 3439234 | 84,716.20 | 100.00% | 4 | 4 | 4 | 0.04% | 10.40% | ALLFVP R                | 1.85 | 815.5138 |
| Control | 6006 | 90-kDa heat shock protein alpha                                        | gi 3439234 | 84,716.20 | 100.00% | 4 | 4 | 4 | 0.04% | 10.40% | GVVDSE DLPLNIS R        | 3.57 | 1,513.79 |
| Control | 6006 | 90-kDa heat shock protein alpha                                        | gi 3439234 | 84,716.20 | 100.00% | 4 | 4 | 4 | 0.04% | 10.40% | HLEINPD HSIHETL R       | 4.14 | 1,786.94 |
| Control | 6006 | 90-kDa heat shock protein alpha                                        | gi 3439234 | 84,716.20 | 100.00% | 4 | 4 | 4 | 0.04% | 10.40% | NPDDITN EEYGEF YK       | 3.28 | 1,833.78 |
| Control | 6006 | 90-kDa heat shock protein alpha                                        | gi 3439234 | 84,716.20 | 100.00% | 4 | 4 | 4 | 0.04% | 10.40% | TLTIVDT GIGMTK          | 4.22 | 1,365.73 |
| Control | 6006 | PREDIC TED: 07,gi 11991 similar to 5717,gi 119 histone cluster 1, H2bd | gi 1199157 | 13,888.60 | 100.00% | 3 | 4 | 5 | 0.05% | 9.52%  | ESYSVY VYK              | 1.99 | 1,137.55 |
| Control | 6006 | PREDIC TED: 07,gi 11991 similar to 5717,gi 119 histone cluster 1, H2bd | gi 1199157 | 13,888.60 | 100.00% | 3 | 4 | 5 | 0.05% | 9.52%  | KESYSV YVYK             | 2.77 | 1,265.64 |
| Control | 6006 | PREDIC TED: 07,gi 11991 similar to 5717,gi 119 histone cluster 1, H2bd | gi 1199157 | 13,888.60 | 100.00% | 3 | 4 | 5 | 0.05% | 9.52%  | SRKESY SVYVYK           | 4.25 | 1,508.77 |



|         |      |                                                                                         |                                       |           |         |   |    |    |       |        |                                  |      |          |
|---------|------|-----------------------------------------------------------------------------------------|---------------------------------------|-----------|---------|---|----|----|-------|--------|----------------------------------|------|----------|
| Control | 6006 | pyruvate kinase 3                                                                       | gi 146231736,gi 194670470,gi 73587283 | 61,410.20 | 100.00% | 5 | 6  | 6  | 0.07% | 11.90% | GDLGIEI<br>PAEK                  | 2.6  | 1,141.61 |
| Control | 6006 | pyruvate kinase 3                                                                       | gi 146231736,gi 194670470,gi 73587283 | 61,410.20 | 100.00% | 5 | 6  | 6  | 0.07% | 11.90% | IISKIENH<br>EGVR                 | 2.84 | 1,394.78 |
| Control | 6006 | pyruvate kinase 3                                                                       | gi 146231736,gi 194670470,gi 73587283 | 61,410.20 | 100.00% | 5 | 6  | 6  | 0.07% | 11.90% | IYVDDG<br>LISLLVK                | 3.19 | 1,447.84 |
| Control | 6006 | pyruvate kinase 3                                                                       | gi 146231736,gi 194670470,gi 73587283 | 61,410.20 | 100.00% | 5 | 6  | 6  | 0.07% | 11.90% | LDIDSPPI<br>TAR                  | 3.43 | 1,197.65 |
| Control | 6006 | pyruvate kinase 3                                                                       | gi 146231736,gi 194670470,gi 73587283 | 61,410.20 | 100.00% | 5 | 6  | 6  | 0.07% | 11.90% | QKGPDF<br>LVTEVE<br>NGGSLG<br>SK | 2.98 | 2,062.05 |
| Control | 6006 | guanine nucleotide binding protein (G protein), alpha inhibiting activity polypeptide 2 | gi 198282135                          | 40,460.10 | 100.00% | 7 | 12 | 22 | 0.24% | 22.50% | AMGNLQ<br>IDFADPS<br>R           | 4.17 | 1,550.73 |
| Control | 6006 | guanine nucleotide binding protein (G protein), alpha inhibiting activity polypeptide 2 | gi 198282135                          | 40,460.10 | 100.00% | 7 | 12 | 22 | 0.24% | 22.50% | AMGNLQ<br>IDFADPS<br>RADDAR      | 2.66 | 2,078.96 |
| Control | 6006 | guanine nucleotide binding protein (G protein), alpha inhibiting activity polypeptide 2 | gi 198282135                          | 40,460.10 | 100.00% | 7 | 12 | 22 | 0.24% | 22.50% | AVVYSN<br>TIQSIMA<br>IVK         | 3.83 | 1,752.96 |
| Control | 6006 | guanine nucleotide binding protein (G protein), alpha inhibiting activity polypeptide 2 | gi 198282135                          | 40,460.10 | 100.00% | 7 | 12 | 22 | 0.24% | 22.50% | EYQLND<br>SAAYYL<br>NDLER        | 3.32 | 2,076.95 |

|         |      |                                                                                         |                           |           |         |   |    |    |       |        |                                 |      |          |
|---------|------|-----------------------------------------------------------------------------------------|---------------------------|-----------|---------|---|----|----|-------|--------|---------------------------------|------|----------|
| Control | 6006 | guanine nucleotide binding protein (G protein), alpha inhibiting activity polypeptide 2 | gi 198282135              | 40,460.10 | 100.00% | 7 | 12 | 22 | 0.24% | 22.50% | IAQSDYI<br>PTQQDV<br>LR         | 3.3  | 1,746.90 |
| Control | 6006 | guanine nucleotide binding protein (G protein), alpha inhibiting activity polypeptide 2 | gi 198282135              | 40,460.10 | 100.00% | 7 | 12 | 22 | 0.24% | 22.50% | LLLLGA<br>GESGK                 | 3.48 | 1,057.63 |
| Control | 6006 | guanine nucleotide binding protein (G protein), alpha inhibiting activity polypeptide 2 | gi 198282135              | 40,460.10 | 100.00% | 7 | 12 | 22 | 0.24% | 22.50% | SREYQL<br>NDSAAY<br>YLNDLE<br>R | 4.1  | 2,320.08 |
| Control | 6006 | FOLH1 protein                                                                           | gi 151553958,gi 156120365 | 84,574.90 | 100.00% | 4 | 4  | 5  | 0.05% | 6.93%  | AFTDPL<br>GLPDRPF<br>YR         | 2.01 | 1,764.91 |
| Control | 6006 | FOLH1 protein                                                                           | gi 151553958,gi 156120365 | 84,574.90 | 100.00% | 4 | 4  | 5  | 0.05% | 6.93%  | IPHLAGT<br>EQNFQL<br>AK         | 3.37 | 1,666.89 |
| Control | 6006 | FOLH1 protein                                                                           | gi 151553958,gi 156120365 | 84,574.90 | 100.00% | 4 | 4  | 5  | 0.05% | 6.93%  | IYNVIGT<br>LR                   | 2.47 | 1,048.62 |
| Control | 6006 | FOLH1 protein                                                                           | gi 151553958,gi 156120365 | 84,574.90 | 100.00% | 4 | 4  | 5  | 0.05% | 6.93%  | LQDLDK<br>NNPILLR               | 2.35 | 1,551.89 |
| Control | 6006 | Na/K-ATPase beta 1 subunit [synthetic construct]                                        | gi 22094876               | 35,156.20 | 100.00% | 3 | 4  | 5  | 0.05% | 10.50% | AYGENI<br>GYSEKD<br>R           | 3.64 | 1,501.69 |
| Control | 6006 | Na/K-ATPase beta 1 subunit [synthetic construct]                                        | gi 22094876               | 35,156.20 | 100.00% | 3 | 4  | 5  | 0.05% | 10.50% | AYGENI<br>GYSEKD<br>RFQGR       | 2.78 | 1,989.94 |
| Control | 6006 | Na/K-ATPase beta 1 subunit [synthetic construct]                                        | gi 22094876               | 35,156.20 | 100.00% | 3 | 4  | 5  | 0.05% | 10.50% | SYMTYV<br>DNIDNFL<br>KK         | 3.44 | 1,866.89 |
| Control | 6006 | plastin 3                                                                               | gi 152941116              | 70,782.90 | 99.80%  | 2 | 2  | 2  | 0.02% | 4.60%  | IDINMSG<br>FNETDD<br>LKR        | 2.74 | 1,883.88 |

|         |      |                                                                                                          |                                                  |           |         |   |   |   |       |        |                                          |          |
|---------|------|----------------------------------------------------------------------------------------------------------|--------------------------------------------------|-----------|---------|---|---|---|-------|--------|------------------------------------------|----------|
| Control | 6006 | plastin 3                                                                                                | gi 152941116                                     | 70,782.90 | 99.80%  | 2 | 2 | 2 | 0.02% | 4.60%  | MINLSVP 3.85<br>DTIDER                   | 1,518.75 |
| Control | 6006 | ARF1 protein                                                                                             | gi 146327384,gi 28603778,gi 59858233,gi 62751462 | 20,583.70 | 100.00% | 3 | 3 | 3 | 0.03% | 30.90% | ILMVGL 2.95<br>DAAGK                     | 1,103.61 |
| Control | 6006 | ARF1 protein                                                                                             | gi 146327384,gi 28603778,gi 59858233,gi 62751462 | 20,583.70 | 100.00% | 3 | 3 | 3 | 0.03% | 30.90% | LKLGEIV 3.38<br>TTIPTIGF<br>NVETVE<br>YK | 2,564.42 |
| Control | 6006 | ARF1 protein                                                                                             | gi 146327384,gi 28603778,gi 59858233,gi 62751462 | 20,583.70 | 100.00% | 3 | 3 | 3 | 0.03% | 30.90% | QDLPNA 2.64<br>MNAAEI<br>TDKLGL<br>HSLR  | 2,423.24 |
| Control | 6006 | RecName :<br>Full=Ann<br>exin A3;<br>AltName:<br>Full=Ann<br>exin-3;<br>AltName:<br>Full=Ann<br>exin III | gi 115299847,gi 74356332,gi 78369184             | 36,125.00 | 100.00% | 7 | 7 | 7 | 0.08% | 21.10% | ALLILAN 2.32<br>GR                       | 940.5939 |
| Control | 6006 | RecName :<br>Full=Ann<br>exin A3;<br>AltName:<br>Full=Ann<br>exin-3;<br>AltName:<br>Full=Ann<br>exin III | gi 115299847,gi 74356332,gi 78369184             | 36,125.00 | 100.00% | 7 | 7 | 7 | 0.08% | 21.10% | GAGTDE 2.98<br>FTLNR                     | 1,180.56 |
| Control | 6006 | RecName :<br>Full=Ann<br>exin A3;<br>AltName:<br>Full=Ann<br>exin-3;<br>AltName:<br>Full=Ann<br>exin III | gi 115299847,gi 74356332,gi 78369184             | 36,125.00 | 100.00% | 7 | 7 | 7 | 0.08% | 21.10% | GIGTDE 3.92<br>KTLISILT<br>ER            | 1,745.96 |
| Control | 6006 | RecName :<br>Full=Ann<br>exin A3;<br>AltName:<br>Full=Ann<br>exin-3;<br>AltName:<br>Full=Ann<br>exin III | gi 115299847,gi 74356332,gi 78369184             | 36,125.00 | 100.00% | 7 | 7 | 7 | 0.08% | 21.10% | LTFDEY 1.73<br>R                         | 943.452  |

|         |      |                                                                                                             |                                                                     |           |         |   |   |    |       |        |                                   |      |          |
|---------|------|-------------------------------------------------------------------------------------------------------------|---------------------------------------------------------------------|-----------|---------|---|---|----|-------|--------|-----------------------------------|------|----------|
| Control | 6006 | RecName<br>:<br>Full=Ann<br>exin A3;<br>AltName:<br>Full=Ann<br>exin-3;<br>AltName:<br>Full=Ann<br>exin III | gi 1152998<br>47,gi 74356<br>332,gi 7836<br>9184                    | 36,125.00 | 100.00% | 7 | 7 | 7  | 0.08% | 21.10% | SEIDLLD<br>IR                     | 3.26 | 1,073.58 |
| Control | 6006 | RecName<br>:<br>Full=Ann<br>exin A3;<br>AltName:<br>Full=Ann<br>exin-3;<br>AltName:<br>Full=Ann<br>exin III | gi 1152998<br>47,gi 74356<br>332,gi 7836<br>9184                    | 36,125.00 | 100.00% | 7 | 7 | 7  | 0.08% | 21.10% | SLGDEIS<br>SETSGDF<br>RK          | 3.14 | 1,727.81 |
| Control | 6006 | RecName<br>:<br>Full=Ann<br>exin A3;<br>AltName:<br>Full=Ann<br>exin-3;<br>AltName:<br>Full=Ann<br>exin III | gi 1152998<br>47,gi 74356<br>332,gi 7836<br>9184                    | 36,125.00 | 100.00% | 7 | 7 | 7  | 0.08% | 21.10% | TLISILTE<br>R                     | 2.49 | 1,045.63 |
| Control | 6006 | Catenin<br>(cadherin-<br>associate<br>d<br>protein),<br>beta 1,<br>88kDa                                    | gi 1113046<br>24,gi 11549<br>7488,gi 122<br>145603,gi 1<br>52941124 | 85,493.00 | 100.00% | 7 | 9 | 10 | 0.11% | 14.20% | GLNTIPL<br>FVQLLY<br>SPIENIQ<br>R | 4.13 | 2,428.36 |
| Control | 6006 | Catenin<br>(cadherin-<br>associate<br>d<br>protein),<br>beta 1,<br>88kDa                                    | gi 1113046<br>24,gi 11549<br>7488,gi 122<br>145603,gi 1<br>52941124 | 85,493.00 | 100.00% | 7 | 9 | 10 | 0.11% | 14.20% | HAVVNL<br>INYQDD<br>AELATR        | 3.82 | 2,042.03 |
| Control | 6006 | Catenin<br>(cadherin-<br>associate<br>d<br>protein),<br>beta 1,<br>88kDa                                    | gi 1113046<br>24,gi 11549<br>7488,gi 122<br>145603,gi 1<br>52941124 | 85,493.00 | 100.00% | 7 | 9 | 10 | 0.11% | 14.20% | LHYGLP<br>VVVK                    | 3.09 | 1,124.68 |
| Control | 6006 | Catenin<br>(cadherin-<br>associate<br>d<br>protein),<br>beta 1,<br>88kDa                                    | gi 1113046<br>24,gi 11549<br>7488,gi 122<br>145603,gi 1<br>52941124 | 85,493.00 | 100.00% | 7 | 9 | 10 | 0.11% | 14.20% | LLNDED<br>QVVVVK                  | 3.37 | 1,385.73 |

|         |      |                                                                   |                                             |            |         |   |   |    |       |        |                                      |          |
|---------|------|-------------------------------------------------------------------|---------------------------------------------|------------|---------|---|---|----|-------|--------|--------------------------------------|----------|
| Control | 6006 | Catenin (cadherin-24,gi 11549 associate d protein), beta 1, 88kDa | gi 1113046 7488,gi 122 145603,gi 1 52941124 | 85,493.00  | 100.00% | 7 | 9 | 10 | 0.11% | 14.20% | LVQLLV R 2.33                        | 840.5666 |
| Control | 6006 | Catenin (cadherin-24,gi 11549 associate d protein), beta 1, 88kDa | gi 1113046 7488,gi 122 145603,gi 1 52941124 | 85,493.00  | 100.00% | 7 | 9 | 10 | 0.11% | 14.20% | MLGSPV DSVLFY AITLHN LLLHQE GAK 4.21 | 3,083.62 |
| Control | 6006 | Catenin (cadherin-24,gi 11549 associate d protein), beta 1, 88kDa | gi 1113046 7488,gi 122 145603,gi 1 52941124 | 85,493.00  | 100.00% | 7 | 9 | 10 | 0.11% | 14.20% | TSMGGT QQQFVE GVR 2.3                | 1,640.77 |
| Control | 6006 | CDP-diacylglycerol synthase (phosphate cytidyltransferase 2)      | gi 1173065 19,gi 11815 1180,gi 158 512477   | 51,340.60  | 99.80%  | 2 | 2 | 2  | 0.02% | 7.87%  | SHLTDK GMLTAA TEDK 2.47              | 1,733.84 |
| Control | 6006 | CDP-diacylglycerol synthase (phosphate cytidyltransferase 2)      | gi 1173065 19,gi 11815 1180,gi 158 512477   | 51,340.60  | 99.80%  | 2 | 2 | 2  | 0.02% | 7.87%  | VAREPE APPEDK ESESEAK 2.36           | 2,097.99 |
| Control | 6006 | PREDICTED: collagen, type XII, alpha 1 isoform 1                  | gi 1946697 78                               | 351,243.80 | 100.00% | 4 | 5 | 5  | 0.05% | 1.70%  | GLTSSEP VSIMEK 2.88                  | 1,393.69 |
| Control | 6006 | PREDICTED: collagen, type XII, alpha 1 isoform 1                  | gi 1946697 78                               | 351,243.80 | 100.00% | 4 | 5 | 5  | 0.05% | 1.70%  | ITYQPST GEGNEQ TTTIGGR 3.36          | 2,110.01 |
| Control | 6006 | PREDICTED: collagen, type XII, alpha 1 isoform 1                  | gi 1946697 78                               | 351,243.80 | 100.00% | 4 | 5 | 5  | 0.05% | 1.70%  | IVEVFEI GPK 2.37                     | 1,130.65 |
| Control | 6006 | PREDICTED: collagen, type XII, alpha 1 isoform 1                  | gi 1946697 78                               | 351,243.80 | 100.00% | 4 | 5 | 5  | 0.05% | 1.70%  | NIGVEVF SLGIK 3.3                    | 1,275.73 |

|         |      |                                                                                   |                                                                                                                                                          |           |         |   |   |    |       |        |                                         |          |
|---------|------|-----------------------------------------------------------------------------------|----------------------------------------------------------------------------------------------------------------------------------------------------------|-----------|---------|---|---|----|-------|--------|-----------------------------------------|----------|
| Control | 6006 | V-ral<br>simian<br>leukemia<br>viral<br>oncogene<br>homolog<br>A (ras<br>related) | gi 7358651<br>3,gi 777362<br>31,gi 95768<br>203                                                                                                          | 23,522.20 | 100.00% | 3 | 4 | 4  | 0.04% | 13.10% | ANVDKV 3.76<br>FFDLMR                   | 1,470.74 |
| Control | 6006 | V-ral<br>simian<br>leukemia<br>viral<br>oncogene<br>homolog<br>A (ras<br>related) | gi 7358651<br>3,gi 777362<br>31,gi 95768<br>203                                                                                                          | 23,522.20 | 100.00% | 3 | 4 | 4  | 0.04% | 13.10% | VFFDLM 1.93<br>R                        | 943.4707 |
| Control | 6006 | V-ral<br>simian<br>leukemia<br>viral<br>oncogene<br>homolog<br>A (ras<br>related) | gi 7358651<br>3,gi 777362<br>31,gi 95768<br>203                                                                                                          | 23,522.20 | 100.00% | 3 | 4 | 4  | 0.04% | 13.10% | VKEDEN 3.87<br>VPFLLV<br>GNK            | 1,700.92 |
| Control | 6006 | hemoglob<br>in alpha<br>chain                                                     | gi 1168129<br>02,gi 12671<br>7493,gi 136<br>34094,gi 19<br>4678485,gi <br>197724899,<br>gi 1977249<br>01,gi 19772<br>4903,gi 600<br>6421,gi 742<br>68120 | 15,035.40 | 100.00% | 5 | 8 | 22 | 0.24% | 48.20% | AVEHLD 4.43<br>DLPGAL<br>SELSDLH<br>AHK | 2,367.19 |
| Control | 6006 | hemoglob<br>in alpha<br>chain                                                     | gi 1168129<br>02,gi 12671<br>7493,gi 136<br>34094,gi 19<br>4678485,gi <br>197724899,<br>gi 1977249<br>01,gi 19772<br>4903,gi 600<br>6421,gi 742<br>68120 | 15,035.40 | 100.00% | 5 | 8 | 22 | 0.24% | 48.20% | FLANVS 4.81<br>TVLTSK                   | 1,279.73 |
| Control | 6006 | hemoglob<br>in alpha<br>chain                                                     | gi 1168129<br>02,gi 12671<br>7493,gi 136<br>34094,gi 19<br>4678485,gi <br>197724899,<br>gi 1977249<br>01,gi 19772<br>4903,gi 600<br>6421,gi 742<br>68120 | 15,035.40 | 100.00% | 5 | 8 | 22 | 0.24% | 48.20% | LRVDPV 2.71<br>NFK                      | 1,087.63 |

|         |      |                                                                            |                                                                                                                  |           |         |   |    |    |       |        |                                 |          |
|---------|------|----------------------------------------------------------------------------|------------------------------------------------------------------------------------------------------------------|-----------|---------|---|----|----|-------|--------|---------------------------------|----------|
| Control | 6006 | hemoglobin alpha chain                                                     | gi 116812902,gi 126717493,gi 13634094,gi 194678485,gi 197724899,gi 197724901,gi 197724903,gi 6006421,gi 74268120 | 15,035.40 | 100.00% | 5 | 8  | 22 | 0.24% | 48.20% | MFLSFPT 2.53<br>TK              | 1,087.55 |
| Control | 6006 | hemoglobin alpha chain                                                     | gi 116812902,gi 126717493,gi 13634094,gi 194678485,gi 197724899,gi 197724901,gi 197724903,gi 6006421,gi 74268120 | 15,035.40 | 100.00% | 5 | 8  | 22 | 0.24% | 48.20% | TYFPHF 2.94<br>DLSHGS<br>AQVK   | 1,833.89 |
| Control | 6006 | RecName : Full=Transmembrane domain-containing protein 1; Flags: Precursor | gi 114152289,gi 83638714,gi 84370158                                                                             | 25,119.90 | 99.80%  | 2 | 2  | 2  | 0.02% | 11.50% | KADGVH 3.06<br>TVEPTE<br>AGDYK  | 1,816.87 |
| Control | 6006 | RecName : Full=Transmembrane domain-containing protein 1; Flags: Precursor | gi 114152289,gi 83638714,gi 84370158                                                                             | 25,119.90 | 99.80%  | 2 | 2  | 2  | 0.02% | 11.50% | SIQVLTL 3.02<br>LR              | 1,042.66 |
| Control | 6006 | polymerase I and transcript release factor isoform 2                       | gi 162287374                                                                                                     | 43,446.30 | 100.00% | 8 | 10 | 12 | 0.13% | 20.80% | IIGAVDQ 4.92<br>IQLTQA<br>QLEER | 2,025.10 |
| Control | 6006 | polymerase I and transcript release factor isoform 2                       | gi 162287374                                                                                                     | 43,446.30 | 100.00% | 8 | 10 | 12 | 0.13% | 20.80% | IREGQVE 4.27<br>VLK             | 1,170.68 |
| Control | 6006 | polymerase I and transcript release factor isoform 2                       | gi 162287374                                                                                                     | 43,446.30 | 100.00% | 8 | 10 | 12 | 0.13% | 20.80% | KLEVNE 4.41<br>AELLR            | 1,313.74 |

|         |      |                                                      |                                                                                              |           |         |    |    |    |       |        |                           |      |          |
|---------|------|------------------------------------------------------|----------------------------------------------------------------------------------------------|-----------|---------|----|----|----|-------|--------|---------------------------|------|----------|
| Control | 6006 | polymerase I and transcript release factor isoform 2 | gi 162287374                                                                                 | 43,446.30 | 100.00% | 8  | 10 | 12 | 0.13% | 20.80% | KSFTPD<br>HVYAR           | 3.52 | 1,419.74 |
| Control | 6006 | polymerase I and transcript release factor isoform 2 | gi 162287374                                                                                 | 43,446.30 | 100.00% | 8  | 10 | 12 | 0.13% | 20.80% | LEVNEA<br>ELLR            | 2.77 | 1,185.65 |
| Control | 6006 | polymerase I and transcript release factor isoform 2 | gi 162287374                                                                                 | 43,446.30 | 100.00% | 8  | 10 | 12 | 0.13% | 20.80% | QAEMEG<br>AVQSIQ<br>GELSK | 4.35 | 1,820.87 |
| Control | 6006 | polymerase I and transcript release factor isoform 2 | gi 162287374                                                                                 | 43,446.30 | 100.00% | 8  | 10 | 12 | 0.13% | 20.80% | SFTPDH<br>VYAR            | 2.83 | 1,291.64 |
| Control | 6006 | polymerase I and transcript release factor isoform 2 | gi 162287374                                                                                 | 43,446.30 | 100.00% | 8  | 10 | 12 | 0.13% | 20.80% | VMIYQD<br>EVKLPA<br>K     | 3.15 | 1,549.83 |
| Control | 6006 | unnamed protein product                              | gi 110292444,gi 1351907,gi 148744077,gi 162648,gi 2190337,gi 23307791,gi 30794280,gi 3336842 | 69,296.20 | 100.00% | 11 | 15 | 76 | 0.83% | 20.80% | DAFLGS<br>FLYEYS<br>R     | 3.34 | 1,567.74 |
| Control | 6006 | unnamed protein product                              | gi 110292444,gi 1351907,gi 148744077,gi 162648,gi 2190337,gi 23307791,gi 30794280,gi 3336842 | 69,296.20 | 100.00% | 11 | 15 | 76 | 0.83% | 20.80% | FKDLGE<br>EHFK            | 4.42 | 1,249.62 |
| Control | 6006 | unnamed protein product                              | gi 110292444,gi 1351907,gi 148744077,gi 162648,gi 2190337,gi 23307791,gi 30794280,gi 3336842 | 69,296.20 | 100.00% | 11 | 15 | 76 | 0.83% | 20.80% | HLVDEP<br>QNLIK           | 2.96 | 1,305.72 |
| Control | 6006 | unnamed protein product                              | gi 110292444,gi 1351907,gi 148744077,gi 162648,gi 2190337,gi 23307791,gi 30794280,gi 3336842 | 69,296.20 | 100.00% | 11 | 15 | 76 | 0.83% | 20.80% | KQTALV<br>ELLK            | 4.41 | 1,142.71 |



|         |      |                               |                                                                                                                              |           |         |    |    |    |       |        |                          |      |          |
|---------|------|-------------------------------|------------------------------------------------------------------------------------------------------------------------------|-----------|---------|----|----|----|-------|--------|--------------------------|------|----------|
| Control | 6006 | unnamed<br>protein<br>product | gi 1102924<br>44,gi 13519<br>07,gi 14874<br>4077,gi 162<br>648,gi 2190<br>337,gi 2330<br>7791,gi 307<br>94280,gi 33<br>36842 | 69,296.20 | 100.00% | 11 | 15 | 76 | 0.83% | 20.80% | KVPQVS<br>TPTLVE<br>VSR  | 4.04 | 1,639.94 |
| Control | 6006 | unnamed<br>protein<br>product | gi 1102924<br>44,gi 13519<br>07,gi 14874<br>4077,gi 162<br>648,gi 2190<br>337,gi 2330<br>7791,gi 307<br>94280,gi 33<br>36842 | 69,296.20 | 100.00% | 11 | 15 | 76 | 0.83% | 20.80% | LVNELT<br>EFAK           | 2.85 | 1,163.63 |
| Control | 6006 | unnamed<br>protein<br>product | gi 1102924<br>44,gi 13519<br>07,gi 14874<br>4077,gi 162<br>648,gi 2190<br>337,gi 2330<br>7791,gi 307<br>94280,gi 33<br>36842 | 69,296.20 | 100.00% | 11 | 15 | 76 | 0.83% | 20.80% | LVVSTQ<br>TALA           | 2.54 | 1,002.58 |
| Control | 6006 | unnamed<br>protein<br>product | gi 1102924<br>44,gi 13519<br>07,gi 14874<br>4077,gi 162<br>648,gi 2190<br>337,gi 2330<br>7791,gi 307<br>94280,gi 33<br>36842 | 69,296.20 | 100.00% | 11 | 15 | 76 | 0.83% | 20.80% | RHPEYA<br>VSVLLR         | 5.3  | 1,439.81 |
| Control | 6006 | unnamed<br>protein<br>product | gi 1102924<br>44,gi 13519<br>07,gi 14874<br>4077,gi 162<br>648,gi 2190<br>337,gi 2330<br>7791,gi 307<br>94280,gi 33<br>36842 | 69,296.20 | 100.00% | 11 | 15 | 76 | 0.83% | 20.80% | RHPYFY<br>APELly<br>YANK | 4.53 | 2,045.03 |
| Control | 6006 | unnamed<br>protein<br>product | gi 1102924<br>44,gi 13519<br>07,gi 14874<br>4077,gi 162<br>648,gi 2190<br>337,gi 2330<br>7791,gi 307<br>94280,gi 33<br>36842 | 69,296.20 | 100.00% | 11 | 15 | 76 | 0.83% | 20.80% | TVMENF<br>VAFVDK         | 3.34 | 1,399.69 |
| Control | 6006 | unnamed<br>protein<br>product | gi 1102924<br>44,gi 13519<br>07,gi 14874<br>4077,gi 162<br>648,gi 2190<br>337,gi 2330<br>7791,gi 307<br>94280,gi 33<br>36842 | 69,296.20 | 100.00% | 11 | 15 | 76 | 0.83% | 20.80% | YLYEIAR                  | 2.05 | 927.4934 |

|         |      |                                                                            |                                                                                     |           |         |    |    |    |       |        |                                     |          |
|---------|------|----------------------------------------------------------------------------|-------------------------------------------------------------------------------------|-----------|---------|----|----|----|-------|--------|-------------------------------------|----------|
| Control | 6006 | B-cell<br>receptor-<br>associate<br>d protein<br>31                        | gi 5985830<br>3,gi 624605<br>74,gi 74354<br>925                                     | 27,884.40 | 99.80%  | 2  | 4  | 4  | 0.04% | 11.00% | KYMEEN 3.04<br>DLLKK                | 1,426.72 |
| Control | 6006 | B-cell<br>receptor-<br>associate<br>d protein<br>31                        | gi 5985830<br>3,gi 624605<br>74,gi 74354<br>925                                     | 27,884.40 | 99.80%  | 2  | 4  | 4  | 0.04% | 11.00% | VNLQNN 3.29<br>PGAVEH<br>FHMK       | 1,850.90 |
| Control | 6006 | PREDIC<br>TED:<br>similar to<br>ribosomal<br>protein<br>S4, X-<br>linked X | gi 1199012<br>81,gi 11993<br>0307,gi 119<br>934106,gi 1<br>94668343,g<br>i 76660997 | 29,599.10 | 99.80%  | 2  | 2  | 2  | 0.02% | 8.75%  | ERHPGS 3.21<br>FDVVHV<br>K          | 1,506.78 |
| Control | 6006 | PREDIC<br>TED:<br>similar to<br>ribosomal<br>protein<br>S4, X-<br>linked X | gi 1199012<br>81,gi 11993<br>0307,gi 119<br>934106,gi 1<br>94668343,g<br>i 76660997 | 29,599.10 | 99.80%  | 2  | 2  | 2  | 0.02% | 8.75%  | TIRYPDP 2.36<br>LIK                 | 1,215.71 |
| Control | 6006 | RecName<br>:<br>Full=Pro<br>hibitin-2                                      | gi 1098928<br>20,gi 11405<br>1223,gi 875<br>78149                                   | 33,340.80 | 100.00% | 12 | 16 | 20 | 0.22% | 44.80% | AQVSLLI 2.4<br>R                    | 899.5673 |
| Control | 6006 | RecName<br>:<br>Full=Pro<br>hibitin-2                                      | gi 1098928<br>20,gi 11405<br>1223,gi 875<br>78149                                   | 33,340.80 | 100.00% | 12 | 16 | 20 | 0.22% | 44.80% | DLQMVN 2.69<br>ISLR                 | 1,204.64 |
| Control | 6006 | RecName<br>:<br>Full=Pro<br>hibitin-2                                      | gi 1098928<br>20,gi 11405<br>1223,gi 875<br>78149                                   | 33,340.80 | 100.00% | 12 | 16 | 20 | 0.22% | 44.80% | FNASQLI 3.12<br>TQR                 | 1,177.63 |
| Control | 6006 | RecName<br>:<br>Full=Pro<br>hibitin-2                                      | gi 1098928<br>20,gi 11405<br>1223,gi 875<br>78149                                   | 33,340.80 | 100.00% | 12 | 16 | 20 | 0.22% | 44.80% | IGGVQQ 3.12<br>DTILAEG<br>LHFR      | 1,853.99 |
| Control | 6006 | RecName<br>:<br>Full=Pro<br>hibitin-2                                      | gi 1098928<br>20,gi 11405<br>1223,gi 875<br>78149                                   | 33,340.80 | 100.00% | 12 | 16 | 20 | 0.22% | 44.80% | ISSPTGS 3.1<br>KDLQMV<br>NISLR      | 1,962.03 |
| Control | 6006 | RecName<br>:<br>Full=Pro<br>hibitin-2                                      | gi 1098928<br>20,gi 11405<br>1223,gi 875<br>78149                                   | 33,340.80 | 100.00% | 12 | 16 | 20 | 0.22% | 44.80% | IVQAEG 2.25<br>EAEAAR               | 1,243.63 |
| Control | 6006 | RecName<br>:<br>Full=Pro<br>hibitin-2                                      | gi 1098928<br>20,gi 11405<br>1223,gi 875<br>78149                                   | 33,340.80 | 100.00% | 12 | 16 | 20 | 0.22% | 44.80% | IYLTAD 5.4<br>NLVLNL<br>QDESFT<br>R | 2,225.15 |
| Control | 6006 | RecName<br>:<br>Full=Pro<br>hibitin-2                                      | gi 1098928<br>20,gi 11405<br>1223,gi 875<br>78149                                   | 33,340.80 | 100.00% | 12 | 16 | 20 | 0.22% | 44.80% | LGLDYE 2.55<br>ER                   | 994.4841 |
| Control | 6006 | RecName<br>:<br>Full=Pro<br>hibitin-2                                      | gi 1098928<br>20,gi 11405<br>1223,gi 875<br>78149                                   | 33,340.80 | 100.00% | 12 | 16 | 20 | 0.22% | 44.80% | LLLGAG 4.44<br>AVAYGI<br>R          | 1,273.76 |
| Control | 6006 | RecName<br>:<br>Full=Pro<br>hibitin-2                                      | gi 1098928<br>20,gi 11405<br>1223,gi 875<br>78149                                   | 33,340.80 | 100.00% | 12 | 16 | 20 | 0.22% | 44.80% | QKIVQA 3.93<br>EGEAEA<br>AR         | 1,499.78 |
| Control | 6006 | RecName<br>:<br>Full=Pro<br>hibitin-2                                      | gi 1098928<br>20,gi 11405<br>1223,gi 875<br>78149                                   | 33,340.80 | 100.00% | 12 | 16 | 20 | 0.22% | 44.80% | VLPSIVN 2.6<br>EVLK                 | 1,210.74 |

|         |      |                                                                                                                                                                                                                                                                                               |                                                                       |           |         |    |    |    |       |        |                                                  |          |
|---------|------|-----------------------------------------------------------------------------------------------------------------------------------------------------------------------------------------------------------------------------------------------------------------------------------------------|-----------------------------------------------------------------------|-----------|---------|----|----|----|-------|--------|--------------------------------------------------|----------|
| Control | 6006 | RecName<br>:<br>Full=Pro<br>hibitin-2                                                                                                                                                                                                                                                         | gi 1098928<br>20,gi 11405<br>1223,gi 875<br>78149                     | 33,340.80 | 100.00% | 12 | 16 | 20 | 0.22% | 44.80% | VLSRPN 2.51<br>AMELPS<br>MYQR                    | 1,907.95 |
| Control | 6006 | TAP1<br>protein                                                                                                                                                                                                                                                                               | gi 1515570<br>07                                                      | 81,933.30 | 100.00% | 5  | 6  | 6  | 0.07% | 10.70% | GVVGAA 3.32<br>LGFR                              | 946.5469 |
| Control | 6006 | TAP1<br>protein                                                                                                                                                                                                                                                                               | gi 1515570<br>07                                                      | 81,933.30 | 100.00% | 5  | 6  | 6  | 0.07% | 10.70% | QVAAVG 4.23<br>QEPLLFGR                          | 1,484.82 |
| Control | 6006 | TAP1<br>protein                                                                                                                                                                                                                                                                               | gi 1515570<br>07                                                      | 81,933.30 | 100.00% | 5  | 6  | 6  | 0.07% | 10.70% | SFANEE 3.34<br>GEAQKFR                           | 1,512.71 |
| Control | 6006 | TAP1<br>protein                                                                                                                                                                                                                                                                               | gi 1515570<br>07                                                      | 81,933.30 | 100.00% | 5  | 6  | 6  | 0.07% | 10.70% | SSQVAIE 2.58<br>VLSAMPTVR                        | 1,703.90 |
| Control | 6006 | TAP1<br>protein                                                                                                                                                                                                                                                                               | gi 1515570<br>07                                                      | 81,933.30 | 100.00% | 5  | 6  | 6  | 0.07% | 10.70% | STVAAL 4.38<br>LQNLQY<br>PTEGQV<br>LLDGEP<br>LPK | 2,894.55 |
| Control | 6006 | signal<br>sequence<br>receptor,<br>gamma<br>(transloco<br>n-<br>associate<br>d protein<br>gamma)                                                                                                                                                                                              | gi 1160043<br>07,gi 12214<br>0189,gi 742<br>68139                     | 21,057.60 | 99.80%  | 2  | 3  | 3  | 0.03% | 9.73%  | GGPKQQ 3.5<br>SEEDLLL<br>QDFSR                   | 2,047.01 |
| Control | 6006 | signal<br>sequence<br>receptor,<br>gamma<br>(transloco<br>n-<br>associate<br>d protein<br>gamma)                                                                                                                                                                                              | gi 1160043<br>07,gi 12214<br>0189,gi 742<br>68139                     | 21,057.60 | 99.80%  | 2  | 3  | 3  | 0.03% | 9.73%  | QQSEED 3.36<br>LLLQDFSR                          | 1,707.82 |
| Control | 6006 | RecName<br>:<br>Full=Ann<br>exin A2;<br>AltName:<br>Full=Ann<br>exin-2;<br>AltName:<br>Full=Ann<br>exin II;<br>AltName:<br>Full=Lip<br>ocortin<br>II;<br>AltName:<br>Full=Cal<br>pactin I<br>heavy<br>chain;<br>AltName:<br>Full=Chr<br>omobindi<br>n-8;<br>AltName:<br>Full=p36;<br>AltName: | gi 113948,g<br>i 162779,gi<br>27807289,g<br>i 59858385,<br>gi 7358698 | 38,523.90 | 100.00% | 11 | 17 | 18 | 0.20% | 44.00% | AYTNFD 4.46<br>AERDAL<br>NIETAIK                 | 2,155.07 |

|         |      |                                                                                                                                                                                                                                                                                                                                                           |           |         |    |    |    |       |        |                                 |          |
|---------|------|-----------------------------------------------------------------------------------------------------------------------------------------------------------------------------------------------------------------------------------------------------------------------------------------------------------------------------------------------------------|-----------|---------|----|----|----|-------|--------|---------------------------------|----------|
| Control | 6006 | RecName gi 113948,g<br>: i 162779,g <br>Full=Ann 27807289,g<br>exin A2; i 59858385,<br>AltName: gi 7358698<br>Full=Ann 2<br>exin-2;<br>AltName:<br>Full=Ann<br>exin II;<br>AltName:<br>Full=Lip<br>ocortin<br>II;<br>AltName:<br>Full=Cal<br>pactin I<br>heavy<br>chain;<br>AltName:<br>Full=Chr<br>omobindi<br>n-8;<br>AltName:<br>Full=p36;<br>AltName: | 38,523.90 | 100.00% | 11 | 17 | 18 | 0.20% | 44.00% | GVDEVT 4.17<br>IVNLTN<br>R      | 1,542.85 |
| Control | 6006 | RecName gi 113948,g<br>: i 162779,g <br>Full=Ann 27807289,g<br>exin A2; i 59858385,<br>AltName: gi 7358698<br>Full=Ann 2<br>exin-2;<br>AltName:<br>Full=Ann<br>exin II;<br>AltName:<br>Full=Lip<br>ocortin<br>II;<br>AltName:<br>Full=Cal<br>pactin I<br>heavy<br>chain;<br>AltName:<br>Full=Chr<br>omobindi<br>n-8;<br>AltName:<br>Full=p36;<br>AltName: | 38,523.90 | 100.00% | 11 | 17 | 18 | 0.20% | 44.00% | LSLEGD 4.45<br>HSTPPSA<br>YGSVK | 1,844.90 |

|         |      |                                                                                                                                                                                                                                                                                                                                                           |           |         |    |    |    |       |        |                            |      |          |
|---------|------|-----------------------------------------------------------------------------------------------------------------------------------------------------------------------------------------------------------------------------------------------------------------------------------------------------------------------------------------------------------|-----------|---------|----|----|----|-------|--------|----------------------------|------|----------|
| Control | 6006 | RecName gi 113948,g<br>: i 162779,g <br>Full=Ann 27807289,g<br>exin A2; i 59858385,<br>AltName: gi 7358698<br>Full=Ann 2<br>exin-2;<br>AltName:<br>Full=Ann<br>exin II;<br>AltName:<br>Full=Lip<br>ocortin<br>II;<br>AltName:<br>Full=Cal<br>pactin I<br>heavy<br>chain;<br>AltName:<br>Full=Chr<br>omobindi<br>n-8;<br>AltName:<br>Full=p36;<br>AltName: | 38,523.90 | 100.00% | 11 | 17 | 18 | 0.20% | 44.00% | QDIAFA<br>YQR              | 2.71 | 1,111.55 |
| Control | 6006 | RecName gi 113948,g<br>: i 162779,g <br>Full=Ann 27807289,g<br>exin A2; i 59858385,<br>AltName: gi 7358698<br>Full=Ann 2<br>exin-2;<br>AltName:<br>Full=Ann<br>exin II;<br>AltName:<br>Full=Lip<br>ocortin<br>II;<br>AltName:<br>Full=Cal<br>pactin I<br>heavy<br>chain;<br>AltName:<br>Full=Chr<br>omobindi<br>n-8;<br>AltName:<br>Full=p36;<br>AltName: | 38,523.90 | 100.00% | 11 | 17 | 18 | 0.20% | 44.00% | RAEDGS<br>VIDYELI<br>DQDAR | 4.53 | 2,064.98 |

|         |      |                                                                                                                                                                                                                                                                                                                                                           |           |         |    |    |    |       |        |                              |          |
|---------|------|-----------------------------------------------------------------------------------------------------------------------------------------------------------------------------------------------------------------------------------------------------------------------------------------------------------------------------------------------------------|-----------|---------|----|----|----|-------|--------|------------------------------|----------|
| Control | 6006 | RecName gi 113948,g<br>: i 162779,g <br>Full=Ann 27807289,g<br>exin A2; i 59858385,<br>AltName: gi 7358698<br>Full=Ann 2<br>exin-2;<br>AltName:<br>Full=Ann<br>exin II;<br>AltName:<br>Full=Lip<br>ocortin<br>II;<br>AltName:<br>Full=Cal<br>pactin I<br>heavy<br>chain;<br>AltName:<br>Full=Chr<br>omobindi<br>n-8;<br>AltName:<br>Full=p36;<br>AltName: | 38,523.90 | 100.00% | 11 | 17 | 18 | 0.20% | 44.00% | SALSGH 3.9<br>LETVILG<br>LLK | 1,650.98 |
| Control | 6006 | RecName gi 113948,g<br>: i 162779,g <br>Full=Ann 27807289,g<br>exin A2; i 59858385,<br>AltName: gi 7358698<br>Full=Ann 2<br>exin-2;<br>AltName:<br>Full=Ann<br>exin II;<br>AltName:<br>Full=Lip<br>ocortin<br>II;<br>AltName:<br>Full=Cal<br>pactin I<br>heavy<br>chain;<br>AltName:<br>Full=Chr<br>omobindi<br>n-8;<br>AltName:<br>Full=p36;<br>AltName: | 38,523.90 | 100.00% | 11 | 17 | 18 | 0.20% | 44.00% | SLYYYIQ 2.6<br>QDTKGD<br>YQK | 2,012.96 |

|         |      |                                                                                                                                                                                                                                                                                                                                                           |           |         |    |    |    |       |        |                                |          |
|---------|------|-----------------------------------------------------------------------------------------------------------------------------------------------------------------------------------------------------------------------------------------------------------------------------------------------------------------------------------------------------------|-----------|---------|----|----|----|-------|--------|--------------------------------|----------|
| Control | 6006 | RecName gi 113948,g<br>: i 162779,g <br>Full=Ann 27807289,g<br>exin A2; i 59858385,<br>AltName: gi 7358698<br>Full=Ann 2<br>exin-2;<br>AltName:<br>Full=Ann<br>exin II;<br>AltName:<br>Full=Lip<br>ocortin<br>II;<br>AltName:<br>Full=Cal<br>pactin I<br>heavy<br>chain;<br>AltName:<br>Full=Chr<br>omobindi<br>n-8;<br>AltName:<br>Full=p36;<br>AltName: | 38,523.90 | 100.00% | 11 | 17 | 18 | 0.20% | 44.00% | SNEQRQ 5.14<br>DIAFAY<br>QR    | 1,725.83 |
| Control | 6006 | RecName gi 113948,g<br>: i 162779,g <br>Full=Ann 27807289,g<br>exin A2; i 59858385,<br>AltName: gi 7358698<br>Full=Ann 2<br>exin-2;<br>AltName:<br>Full=Ann<br>exin II;<br>AltName:<br>Full=Lip<br>ocortin<br>II;<br>AltName:<br>Full=Cal<br>pactin I<br>heavy<br>chain;<br>AltName:<br>Full=Chr<br>omobindi<br>n-8;<br>AltName:<br>Full=p36;<br>AltName: | 38,523.90 | 100.00% | 11 | 17 | 18 | 0.20% | 44.00% | TDLEKDI 3.71<br>VSDTSG<br>DFRK | 1,925.95 |

|         |      |                                                                                                                                                                                                                                                                                                                                                           |           |         |    |    |    |       |        |                               |          |
|---------|------|-----------------------------------------------------------------------------------------------------------------------------------------------------------------------------------------------------------------------------------------------------------------------------------------------------------------------------------------------------------|-----------|---------|----|----|----|-------|--------|-------------------------------|----------|
| Control | 6006 | RecName gi 113948,g<br>: i 162779,g <br>Full=Ann 27807289,g<br>exin A2; i 59858385,<br>AltName: gi 7358698<br>Full=Ann 2<br>exin-2;<br>AltName:<br>Full=Ann<br>exin II;<br>AltName:<br>Full=Lip<br>ocortin<br>II;<br>AltName:<br>Full=Cal<br>pactin I<br>heavy<br>chain;<br>AltName:<br>Full=Chr<br>omobindi<br>n-8;<br>AltName:<br>Full=p36;<br>AltName: | 38,523.90 | 100.00% | 11 | 17 | 18 | 0.20% | 44.00% | TKGVDE 4.24<br>VTIVNIL<br>TNR | 1,771.99 |
| Control | 6006 | RecName gi 113948,g<br>: i 162779,g <br>Full=Ann 27807289,g<br>exin A2; i 59858385,<br>AltName: gi 7358698<br>Full=Ann 2<br>exin-2;<br>AltName:<br>Full=Ann<br>exin II;<br>AltName:<br>Full=Lip<br>ocortin<br>II;<br>AltName:<br>Full=Cal<br>pactin I<br>heavy<br>chain;<br>AltName:<br>Full=Chr<br>omobindi<br>n-8;<br>AltName:<br>Full=p36;<br>AltName: | 38,523.90 | 100.00% | 11 | 17 | 18 | 0.20% | 44.00% | TPAQYD 3.15<br>ASELKA<br>SMK  | 1,655.79 |
| Control | 6006 | RecName gi 1102830<br>: 11,g 27806<br>Full=Try 353,g 7435<br>ptophanyl-4933,g 825<br>tRNA<br>synthetas<br>e,<br>cytoplas<br>mic;<br>AltName:<br>Full=Try<br>ptophan--<br>tRNA<br>ligase;<br>Short=Tr<br>pRS                                                                                                                                               | 53,712.80 | 100.00% | 3  | 3  | 3  | 0.03% | 9.05%  | ELIEVLQ 2.45<br>PLIAEHQ<br>AR | 1,859.04 |



|         |      |                                                                                                                                                                                                                  |            |         |   |   |   |       |        |                                   |      |          |
|---------|------|------------------------------------------------------------------------------------------------------------------------------------------------------------------------------------------------------------------|------------|---------|---|---|---|-------|--------|-----------------------------------|------|----------|
| Control | 6006 | RecName gi 1102830 :<br>: 11.gi 27806<br>Full=Try 353.gi 7435<br>ptophanyl:4933.gi 825<br>tRNA<br>synthetas<br>e,<br>cytoplas<br>mic;<br>AltName:<br>Full=Try<br>ptophan--<br>tRNA<br>ligase;<br>Short=Tr<br>pRS | 53,712.80  | 100.00% | 3 | 3 | 3 | 0.03% | 9.05%  | GIDYDK<br>LIVR                    | 2.45 | 1,191.67 |
| Control | 6006 | RecName gi 1102830 :<br>: 11.gi 27806<br>Full=Try 353.gi 7435<br>ptophanyl:4933.gi 825<br>tRNA<br>synthetas<br>e,<br>cytoplas<br>mic;<br>AltName:<br>Full=Try<br>ptophan--<br>tRNA<br>ligase;<br>Short=Tr<br>pRS | 53,712.80  | 100.00% | 3 | 3 | 3 | 0.03% | 9.05%  | MSASDP<br>NSSIFLT<br>DTAK         | 3.64 | 1,800.83 |
| Control | 6006 | PREDIC gi 1198922 TED:<br>65<br>similar to<br>Transme<br>mbrane<br>protein<br>16F                                                                                                                                | 106,290.10 | 100.00% | 3 | 3 | 3 | 0.03% | 5.60%  | LLQVDE<br>SIKPEQ<br>EFFTAPF<br>EK | 1.95 | 2,608.35 |
| Control | 6006 | PREDIC gi 1198922 TED:<br>65<br>similar to<br>Transme<br>mbrane<br>protein<br>16F                                                                                                                                | 106,290.10 | 100.00% | 3 | 3 | 3 | 0.03% | 5.60%  | MNDFYI<br>QDRDTF<br>FNPATR        | 2.36 | 2,267.02 |
| Control | 6006 | PREDIC gi 1198922 TED:<br>65<br>similar to<br>Transme<br>mbrane<br>protein<br>16F                                                                                                                                | 106,290.10 | 100.00% | 3 | 3 | 3 | 0.03% | 5.60%  | SLVDDK<br>LVFVK                   | 2.43 | 1,262.74 |
| Control | 6006 | VAPB gi 1260107 protein<br>84.gi 12927<br>0105.gi 160<br>210887                                                                                                                                                  | 27,140.50  | 100.00% | 5 | 6 | 7 | 0.08% | 16.90% | ALSSSLD<br>DTEVK                  | 2.97 | 1,264.63 |
| Control | 6006 | VAPB gi 1260107 protein<br>84.gi 12927<br>0105.gi 160<br>210887                                                                                                                                                  | 27,140.50  | 100.00% | 5 | 6 | 7 | 0.08% | 16.90% | ALSSSLD<br>DTEVKK                 | 3.29 | 1,392.72 |
| Control | 6006 | VAPB gi 1260107 protein<br>84.gi 12927<br>0105.gi 160<br>210887                                                                                                                                                  | 27,140.50  | 100.00% | 5 | 6 | 7 | 0.08% | 16.90% | FRGPFT<br>DVVTN<br>LK             | 2.97 | 1,594.86 |

|         |      |                                                                                                         |                                        |           |         |   |   |   |       |        |                                     |      |          |
|---------|------|---------------------------------------------------------------------------------------------------------|----------------------------------------|-----------|---------|---|---|---|-------|--------|-------------------------------------|------|----------|
| Control | 6006 | VAPB protein                                                                                            | gi 126010784,gi 129270105,gi 160210887 | 27,140.50 | 100.00% | 5 | 6 | 7 | 0.08% | 16.90% | GPFTDV VTTNLK                       | 3.85 | 1,291.69 |
| Control | 6006 | VAPB protein                                                                                            | gi 126010784,gi 129270105,gi 160210887 | 27,140.50 | 100.00% | 5 | 6 | 7 | 0.08% | 16.90% | VEQVLS LEPQHE LK                    | 4.23 | 1,648.89 |
| Control | 6006 | moesin                                                                                                  | gi 114050715,gi 118583148,gi 87578169  | 67,959.00 | 100.00% | 5 | 5 | 5 | 0.05% | 13.50% | APDFVF YAPR                         | 3.27 | 1,182.59 |
| Control | 6006 | moesin                                                                                                  | gi 114050715,gi 118583148,gi 87578169  | 67,959.00 | 100.00% | 5 | 5 | 5 | 0.05% | 13.50% | FYPEDV SEELIQD ITQR                 | 2.77 | 2,082.00 |
| Control | 6006 | moesin                                                                                                  | gi 114050715,gi 118583148,gi 87578169  | 67,959.00 | 100.00% | 5 | 5 | 5 | 0.05% | 13.50% | KAPDFV FYAPR                        | 2.78 | 1,310.69 |
| Control | 6006 | moesin                                                                                                  | gi 114050715,gi 118583148,gi 87578169  | 67,959.00 | 100.00% | 5 | 5 | 5 | 0.05% | 13.50% | TAMSTP HVAEPA ENEQDE QDENGAEASAEL R | 6.09 | 3,342.43 |
| Control | 6006 | moesin                                                                                                  | gi 114050715,gi 118583148,gi 87578169  | 67,959.00 | 100.00% | 5 | 5 | 5 | 0.05% | 13.50% | VTTMDA ELEFAIQ PNTTGK               | 3.2  | 2,082.01 |
| Control | 6006 | PREDICTED: similar to Keratin, type I cytoskeletal 24 (Cytokeratin-24) (Keratin-24) (Type I keratin-24) | gi 194676109                           | 55,111.70 | 100.00% | 2 | 2 | 2 | 0.02% | 5.33%  | KVLDDL TMTR                         | 3.29 | 1,207.64 |
| Control | 6006 | PREDICTED: similar to Keratin, type I cytoskeletal 24 (Cytokeratin-24) (Keratin-24) (Type I keratin-24) | gi 194676109                           | 55,111.70 | 100.00% | 2 | 2 | 2 | 0.02% | 5.33%  | SDLEMQ IESLTEE LAYLK                | 2.63 | 2,112.04 |
| Control | 6006 | PREDICTED: transmembrane protein 33 isoform 2                                                           | gi 119893815,gi 119922774              | 27,968.00 | 99.80%  | 2 | 2 | 2 | 0.02% | 8.10%  | ALLANA LTSALR                       | 3.77 | 1,213.73 |

|         |      |                                                                                                     |                                                                                    |           |         |   |   |   |       |        |                         |          |
|---------|------|-----------------------------------------------------------------------------------------------------|------------------------------------------------------------------------------------|-----------|---------|---|---|---|-------|--------|-------------------------|----------|
| Control | 6006 | PREDICTED: transmembrane protein 33 isoform 2                                                       | gi 119893815,gi 119922774                                                          | 27,968.00 | 99.80%  | 2 | 2 | 2 | 0.02% | 8.10%  | LPHFQLS 2.33 R          | 997.5578 |
| Control | 6006 | Chain A, Crystallization And Structure Determination Of Bovine Profilin At 2.0 Angstroms Resolution | gi 157833536,gi 157878211,gi 576369,gi 59858521,gi 6228870,gi 62751593,gi 73586531 | 15,039.50 | 100.00% | 4 | 5 | 7 | 0.08% | 43.60% | DSLLQD 3.39 GEFTMD LR   | 1,655.76 |
| Control | 6006 | Chain A, Crystallization And Structure Determination Of Bovine Profilin At 2.0 Angstroms Resolution | gi 157833536,gi 157878211,gi 576369,gi 59858521,gi 6228870,gi 62751593,gi 73586531 | 15,039.50 | 100.00% | 4 | 5 | 7 | 0.08% | 43.60% | SSFFVNG 3.78 LTLGGQ K   | 1,454.76 |
| Control | 6006 | Chain A, Crystallization And Structure Determination Of Bovine Profilin At 2.0 Angstroms Resolution | gi 157833536,gi 157878211,gi 576369,gi 59858521,gi 6228870,gi 62751593,gi 73586531 | 15,039.50 | 100.00% | 4 | 5 | 7 | 0.08% | 43.60% | STGGAP 3.32 TFNITV MTAK | 1,712.85 |
| Control | 6006 | Chain A, Crystallization And Structure Determination Of Bovine Profilin At 2.0 Angstroms Resolution | gi 157833536,gi 157878211,gi 576369,gi 59858521,gi 6228870,gi 62751593,gi 73586531 | 15,039.50 | 100.00% | 4 | 5 | 7 | 0.08% | 43.60% | TFVNITP 2.82 AEVGILV GK | 1,657.95 |

|         |      |                                                    |                                                  |            |         |   |   |   |       |        |                                                         |      |          |
|---------|------|----------------------------------------------------|--------------------------------------------------|------------|---------|---|---|---|-------|--------|---------------------------------------------------------|------|----------|
| Control | 6006 | Brain abundant, membrane attached signal protein 1 | gi 115304757,gi 1930063,gi 27807507,gi 6686271   | 22,992.60  | 99.80%  | 2 | 2 | 2 | 0.02% | 28.20% | AQAPAA<br>PADEVK<br>PAETPA<br>ANSDQT<br>VAVKE           | 3.39 | 2,876.43 |
| Control | 6006 | Brain abundant, membrane attached signal protein 1 | gi 115304757,gi 1930063,gi 27807507,gi 6686271   | 22,992.60  | 99.80%  | 2 | 2 | 2 | 0.02% | 28.20% | SDGAPA<br>SDSKPSS<br>TEAAPSS<br>KETPAA<br>TEAPSST<br>PK | 3.54 | 3,344.56 |
| Control | 6006 | Heme oxygenase (decyclin g) 1                      | gi 158455152,gi 59858301,gi 62460520,gi 73919958 | 32,922.40  | 99.80%  | 2 | 3 | 4 | 0.04% | 14.50% | ALNLPSS<br>GGLAF<br>FTFPNIA<br>SATK                     | 3.75 | 2,453.27 |
| Control | 6006 | Heme oxygenase (decyclin g) 1                      | gi 158455152,gi 59858301,gi 62460520,gi 73919958 | 32,922.40  | 99.80%  | 2 | 3 | 4 | 0.04% | 14.50% | NKENPV<br>YTPLYFP<br>EELHR                              | 5.27 | 2,246.12 |
| Control | 6006 | HADHA protein 5                                    | gi 74268185                                      | 83,232.60  | 100.00% | 3 | 3 | 3 | 0.03% | 5.77%  | GFYIYQE<br>GVK                                          | 2.84 | 1,203.60 |
| Control | 6006 | HADHA protein 5                                    | gi 74268185                                      | 83,232.60  | 100.00% | 3 | 3 | 3 | 0.03% | 5.77%  | HVAENL<br>GKEFGE<br>R                                   | 3.13 | 1,485.74 |
| Control | 6006 | HADHA protein 5                                    | gi 74268185                                      | 83,232.60  | 100.00% | 3 | 3 | 3 | 0.03% | 5.77%  | TVLGSP<br>EVLLGIL<br>PGAGAT<br>QR                       | 3.02 | 2,049.17 |
| Control | 6006 | RecName : Full=Thrombospondin-1; Flags: Precursor  | gi 12644428,gi 2244707,gi 41386685               | 129,515.10 | 100.00% | 3 | 3 | 4 | 0.04% | 2.91%  | FQDLVD<br>AVR                                           | 2.55 | 1,062.56 |
| Control | 6006 | RecName : Full=Thrombospondin-1; Flags: Precursor  | gi 12644428,gi 2244707,gi 41386685               | 129,515.10 | 100.00% | 3 | 3 | 4 | 0.04% | 2.91%  | KVTEEN<br>KELANE<br>LR                                  | 3.11 | 1,672.89 |
| Control | 6006 | RecName : Full=Thrombospondin-1; Flags: Precursor  | gi 12644428,gi 2244707,gi 41386685               | 129,515.10 | 100.00% | 3 | 3 | 4 | 0.04% | 2.91%  | TIVTTLQ<br>DSIR                                         | 3.15 | 1,246.70 |
| Control | 6006 | annexin 5                                          | gi 119936560,gi 120474983,gi 260137,gi 73586525  | 36,057.60  | 100.00% | 4 | 5 | 5 | 0.05% | 17.80% | DLDDL<br>KSELTG<br>KFEK                                 | 2.93 | 1,850.98 |
| Control | 6006 | annexin 5                                          | gi 119936560,gi 120474983,gi 260137,gi 73586525  | 36,057.60  | 100.00% | 4 | 5 | 5 | 0.05% | 17.80% | GLGTDE<br>ESILTLL<br>TSR                                | 3.41 | 1,704.90 |

|         |      |                                                                                                                                                                                         |                                                                                                                                        |           |         |   |   |   |       |        |                                         |          |
|---------|------|-----------------------------------------------------------------------------------------------------------------------------------------------------------------------------------------|----------------------------------------------------------------------------------------------------------------------------------------|-----------|---------|---|---|---|-------|--------|-----------------------------------------|----------|
| Control | 6006 | annexin 5<br>60,gi 12047<br>4983,gi 260<br>137,gi 7358<br>6525                                                                                                                          | gi 1199365                                                                                                                             | 36,057.60 | 100.00% | 4 | 5 | 5 | 0.05% | 17.80% | MLVVLL 2.46<br>QANRDP<br>DAR            | 1,726.93 |
| Control | 6006 | annexin 5<br>60,gi 12047<br>4983,gi 260<br>137,gi 7358<br>6525                                                                                                                          | gi 1199365                                                                                                                             | 36,057.60 | 100.00% | 4 | 5 | 5 | 0.05% | 17.80% | SEIDLYN 2.47<br>IRK                     | 1,250.67 |
| Control | 6006 | RecName<br>:<br>Full=Thi<br>oredoxin<br>domain-<br>containin<br>g protein<br>4; Flags:<br>Precursor                                                                                     | gi 1088619<br>17,gi 74354<br>589,gi 7804<br>2524                                                                                       | 46,819.40 | 99.80%  | 2 | 2 | 2 | 0.02% | 8.37%  | HMYVFG 2.42<br>DFRDVLI<br>PGK           | 1,909.96 |
| Control | 6006 | RecName<br>:<br>Full=Thi<br>oredoxin<br>domain-<br>containin<br>g protein<br>4; Flags:<br>Precursor                                                                                     | gi 1088619<br>17,gi 74354<br>589,gi 7804<br>2524                                                                                       | 46,819.40 | 99.80%  | 2 | 2 | 2 | 0.02% | 8.37%  | SDPIQEL 2.14<br>HDLAEIT<br>TPDR         | 2,050.01 |
| Control | 6006 | RecName<br>:<br>Full=Mit<br>ochondri<br>al 2-<br>oxoglutar<br>ate/malat<br>e carrier<br>protein;<br>Short=O<br>GCP;<br>AltName:<br>Full=Solu<br>te carrier<br>family 25<br>member<br>11 | gi 126664,g<br>i 14623167<br>6,gi 148744<br>036,gi 1488<br>78065,gi 16<br>3432,gi 163<br>434,gi 2780<br>7211,gi 32,<br>gi 5985797<br>7 | 34,155.00 | 100.00% | 3 | 3 | 3 | 0.03% | 14.60% | AVVVNA 2.66<br>AQLASY<br>SQSK           | 1,635.87 |
| Control | 6006 | RecName<br>:<br>Full=Mit<br>ochondri<br>al 2-<br>oxoglutar<br>ate/malat<br>e carrier<br>protein;<br>Short=O<br>GCP;<br>AltName:<br>Full=Solu<br>te carrier<br>family 25<br>member<br>11 | gi 126664,g<br>i 14623167<br>6,gi 148744<br>036,gi 1488<br>78065,gi 16<br>3432,gi 163<br>434,gi 2780<br>7211,gi 32,<br>gi 5985797<br>7 | 34,155.00 | 100.00% | 3 | 3 | 3 | 0.03% | 14.60% | FLFGGL 2.22<br>AGMGAT<br>VFVQPL<br>DLVK | 2,296.24 |

|         |      |                                                                                                                                                                                         |                                                                                                                                        |           |         |   |   |   |       |        |                                         |          |
|---------|------|-----------------------------------------------------------------------------------------------------------------------------------------------------------------------------------------|----------------------------------------------------------------------------------------------------------------------------------------|-----------|---------|---|---|---|-------|--------|-----------------------------------------|----------|
| Control | 6006 | RecName<br>:<br>Full=Mit<br>ochondri<br>al 2-<br>oxoglutar<br>ate/malat<br>e carrier<br>protein;<br>Short=O<br>GCP;<br>AltName:<br>Full=Solu<br>te carrier<br>family 25<br>member<br>11 | gi 126664.g<br>i 14623167<br>6,gi 148744<br>036,gi 1488<br>78065,gi 16<br>3432,gi 163<br>434,gi 2780<br>7211,gi 32,<br>gi 5985797<br>7 | 34,155.00 | 100.00% | 3 | 3 | 3 | 0.03% | 14.60% | NVFNAL 2.16<br>FR                       | 980.5311 |
| Control | 6006 | ER lipid<br>raft<br>associate<br>d 2                                                                                                                                                    | gi 1140510<br>93,gi 12213<br>4590,gi 920<br>97476                                                                                      | 37,713.20 | 100.00% | 3 | 3 | 3 | 0.03% | 10.70% | ISEIEDA 2.81<br>AFLAR                   | 1,334.70 |
| Control | 6006 | ER lipid<br>raft<br>associate<br>d 2                                                                                                                                                    | gi 1140510<br>93,gi 12213<br>4590,gi 920<br>97476                                                                                      | 37,713.20 | 100.00% | 3 | 3 | 3 | 0.03% | 10.70% | SVQTTL 3.47<br>QTDEVK                   | 1,348.70 |
| Control | 6006 | ER lipid<br>raft<br>associate<br>d 2                                                                                                                                                    | gi 1140510<br>93,gi 12213<br>4590,gi 920<br>97476                                                                                      | 37,713.20 | 100.00% | 3 | 3 | 3 | 0.03% | 10.70% | VTKPNIP 2.06<br>EAIRR                   | 1,393.83 |
| Control | 6006 | GLI<br>pathogen<br>esis-<br>related 2                                                                                                                                                   | gi 1113070<br>81,gi 11549<br>7826                                                                                                      | 17,191.20 | 99.80%  | 2 | 2 | 2 | 0.02% | 16.90% | ASASDG 2.56<br>SSFVVA<br>R              | 1,253.61 |
| Control | 6006 | GLI<br>pathogen<br>esis-<br>related 2                                                                                                                                                   | gi 1113070<br>81,gi 11549<br>7826                                                                                                      | 17,191.20 | 99.80%  | 2 | 2 | 2 | 0.02% | 16.90% | EAQQYS 2.68<br>EALAST<br>R              | 1,453.69 |
| Control | 6006 | ATAD3A<br>protein                                                                                                                                                                       | gi 1572788<br>89,gi 15742<br>8048,gi 162<br>416153                                                                                     | 66,090.40 | 100.00% | 7 | 8 | 9 | 0.10% | 16.40% | ITVLEAL 2.61<br>R                       | 914.567  |
| Control | 6006 | ATAD3A<br>protein                                                                                                                                                                       | gi 1572788<br>89,gi 15742<br>8048,gi 162<br>416153                                                                                     | 66,090.40 | 100.00% | 7 | 8 | 9 | 0.10% | 16.40% | LKEYEA 3.31<br>AVEQLK<br>GDQIR          | 1,990.06 |
| Control | 6006 | ATAD3A<br>protein                                                                                                                                                                       | gi 1572788<br>89,gi 15742<br>8048,gi 162<br>416153                                                                                     | 66,090.40 | 100.00% | 7 | 8 | 9 | 0.10% | 16.40% | MYFDKY 2.5<br>VLKPAT<br>EGK             | 1,805.91 |
| Control | 6006 | ATAD3A<br>protein                                                                                                                                                                       | gi 1572788<br>89,gi 15742<br>8048,gi 162<br>416153                                                                                     | 66,090.40 | 100.00% | 7 | 8 | 9 | 0.10% | 16.40% | NVLMYG 2.83<br>PPGTGK                   | 1,249.62 |
| Control | 6006 | ATAD3A<br>protein                                                                                                                                                                       | gi 1572788<br>89,gi 15742<br>8048,gi 162<br>416153                                                                                     | 66,090.40 | 100.00% | 7 | 8 | 9 | 0.10% | 16.40% | QQQLLN 2.25<br>EENLR                    | 1,384.72 |
| Control | 6006 | ATAD3A<br>protein                                                                                                                                                                       | gi 1572788<br>89,gi 15742<br>8048,gi 162<br>416153                                                                                     | 66,090.40 | 100.00% | 7 | 8 | 9 | 0.10% | 16.40% | RLLSKP 3.88<br>QDALEG<br>VVLSPSL<br>EAR | 2,378.34 |
| Control | 6006 | ATAD3A<br>protein                                                                                                                                                                       | gi 1572788<br>89,gi 15742<br>8048,gi 162<br>416153                                                                                     | 66,090.40 | 100.00% | 7 | 8 | 9 | 0.10% | 16.40% | TAGTLF 3.4<br>GEGFR                     | 1,155.58 |

|         |      |                                           |                                                                 |            |         |   |   |   |       |        |                                  |      |          |
|---------|------|-------------------------------------------|-----------------------------------------------------------------|------------|---------|---|---|---|-------|--------|----------------------------------|------|----------|
| Control | 6006 | glucose-regulated protein GRP94 precursor | gi 1604105<br>7,gi 278072<br>63,gi 33301<br>108,gi 7577<br>5556 | 92,411.40  | 100.00% | 7 | 7 | 8 | 0.09% | 12.60% | AQAYQT<br>GKDISTN<br>YYASQK<br>K | 3.67 | 2,265.11 |
| Control | 6006 | glucose-regulated protein GRP94 precursor | gi 1604105<br>7,gi 278072<br>63,gi 33301<br>108,gi 7577<br>5556 | 92,411.40  | 100.00% | 7 | 7 | 8 | 0.09% | 12.60% | ELISNAS<br>DALDKI<br>R           | 3.84 | 1,544.83 |
| Control | 6006 | glucose-regulated protein GRP94 precursor | gi 1604105<br>7,gi 278072<br>63,gi 33301<br>108,gi 7577<br>5556 | 92,411.40  | 100.00% | 7 | 7 | 8 | 0.09% | 12.60% | FAFQAE<br>VNR                    | 2.9  | 1,081.54 |
| Control | 6006 | glucose-regulated protein GRP94 precursor | gi 1604105<br>7,gi 278072<br>63,gi 33301<br>108,gi 7577<br>5556 | 92,411.40  | 100.00% | 7 | 7 | 8 | 0.09% | 12.60% | FQSSH<br>PSDMTS<br>LDQYVE<br>R   | 3.79 | 2,280.00 |
| Control | 6006 | glucose-regulated protein GRP94 precursor | gi 1604105<br>7,gi 278072<br>63,gi 33301<br>108,gi 7577<br>5556 | 92,411.40  | 100.00% | 7 | 7 | 8 | 0.09% | 12.60% | GLFDEY<br>GSK                    | 2.57 | 1,015.47 |
| Control | 6006 | glucose-regulated protein GRP94 precursor | gi 1604105<br>7,gi 278072<br>63,gi 33301<br>108,gi 7577<br>5556 | 92,411.40  | 100.00% | 7 | 7 | 8 | 0.09% | 12.60% | NLLHVT<br>DTGVG<br>MTREEL<br>VK  | 2.67 | 2,128.11 |
| Control | 6006 | glucose-regulated protein GRP94 precursor | gi 1604105<br>7,gi 278072<br>63,gi 33301<br>108,gi 7577<br>5556 | 92,411.40  | 100.00% | 7 | 7 | 8 | 0.09% | 12.60% | SILFVPT<br>SAPR                  | 3.26 | 1,187.68 |
| Control | 6006 | PREDIC TED: similar to catenin, delta 1   | gi 1946735<br>32                                                | 106,846.20 | 100.00% | 5 | 6 | 6 | 0.07% | 6.98%  | ALSAIAD<br>LLTNEH<br>ER          | 4.54 | 1,652.86 |
| Control | 6006 | PREDIC TED: similar to catenin, delta 1   | gi 1946735<br>32                                                | 106,846.20 | 100.00% | 5 | 6 | 6 | 0.07% | 6.98%  | APSRQD<br>VYGPQP<br>QVR          | 4.4  | 1,697.87 |
| Control | 6006 | PREDIC TED: similar to catenin, delta 1   | gi 1946735<br>32                                                | 106,846.20 | 100.00% | 5 | 6 | 6 | 0.07% | 6.98%  | FVGADAD<br>LER                   | 2.4  | 1,021.50 |
| Control | 6006 | PREDIC TED: similar to catenin, delta 1   | gi 1946735<br>32                                                | 106,846.20 | 100.00% | 5 | 6 | 6 | 0.07% | 6.98%  | KPTEDP<br>TNDTVD<br>FPKR         | 1.84 | 1,859.91 |
| Control | 6006 | PREDIC TED: similar to catenin, delta 1   | gi 1946735<br>32                                                | 106,846.20 | 100.00% | 5 | 6 | 6 | 0.07% | 6.98%  | SLDNNY<br>STLNER                 | 2.27 | 1,425.66 |

|         |      |                                                |                                          |            |         |   |   |   |       |        |                                           |          |
|---------|------|------------------------------------------------|------------------------------------------|------------|---------|---|---|---|-------|--------|-------------------------------------------|----------|
| Control | 6006 | FK506 binding protein 11, 19 kDa               | gi 1140533 49,gi 12213 8212,gi 825 71590 | 22,457.80  | 100.00% | 6 | 7 | 7 | 0.08% | 15.30% | DPLVIEL 3.4<br>GQK                        | 1,111.64 |
| Control | 6006 | FK506 binding protein 11, 19 kDa               | gi 1140533 49,gi 12213 8212,gi 825 71590 | 22,457.80  | 100.00% | 6 | 7 | 7 | 0.08% | 15.30% | IFDTSLT 2.14<br>R                         | 952.5099 |
| Control | 6006 | FK506 binding protein 11, 19 kDa               | gi 1140533 49,gi 12213 8212,gi 825 71590 | 22,457.80  | 100.00% | 6 | 7 | 7 | 0.08% | 15.30% | IFDTSLT 5.66<br>RDPLVIE<br>LGQK           | 2,045.13 |
| Control | 6006 | FK506 binding protein 11, 19 kDa               | gi 1140533 49,gi 12213 8212,gi 825 71590 | 22,457.80  | 100.00% | 6 | 7 | 7 | 0.08% | 15.30% | RVIIPSH 3.28<br>LAYGK                     | 1,353.80 |
| Control | 6006 | FK506 binding protein 11, 19 kDa               | gi 1140533 49,gi 12213 8212,gi 825 71590 | 22,457.80  | 100.00% | 6 | 7 | 7 | 0.08% | 15.30% | VIIPSHL 2.39<br>AYGK                      | 1,197.70 |
| Control | 6006 | FK506 binding protein 11, 19 kDa               | gi 1140533 49,gi 12213 8212,gi 825 71590 | 22,457.80  | 100.00% | 6 | 7 | 7 | 0.08% | 15.30% | VIIPSHL 2.04<br>AYGKR                     | 1,353.80 |
| Control | 6006 | endoglin                                       | gi 1154971 10,gi 92097 469               | 69,885.10  | 99.80%  | 2 | 3 | 3 | 0.03% | 3.25%  | FSLLR 1.71                                | 782.4559 |
| Control | 6006 | endoglin                                       | gi 1154971 10,gi 92097 469               | 69,885.10  | 99.80%  | 2 | 3 | 3 | 0.03% | 3.25%  | LQAPGIP 4.05<br>LQLAYD<br>SK              | 1,613.89 |
| Control | 6006 | SPTLC2 protein                                 | gi 1487455 25,gi 14964 2795              | 62,871.50  | 100.00% | 2 | 3 | 3 | 0.03% | 7.47%  | NIGVVV 4.17<br>VGFPAT<br>PIESR            | 1,868.06 |
| Control | 6006 | SPTLC2 protein                                 | gi 1487455 25,gi 14964 2795              | 62,871.50  | 100.00% | 2 | 3 | 3 | 0.03% | 7.47%  | SSAAAA 4.18<br>AAAAGQ<br>IHHVTE<br>NGGLYK | 2,295.15 |
| Control | 6006 | PREDIC TED: similar to neuropili n-1 isoform 1 | gi 7663221 2,gi 766322 26                | 102,993.80 | 100.00% | 6 | 7 | 8 | 0.09% | 8.67%  | DKLNPQ 3.18<br>STYSEA                     | 1,352.63 |
| Control | 6006 | PREDIC TED: similar to neuropili n-1 isoform 1 | gi 7663221 2,gi 766322 26                | 102,993.80 | 100.00% | 6 | 7 | 8 | 0.09% | 8.67%  | FVTAVG 3.19<br>TQGAISK                    | 1,278.71 |
| Control | 6006 | PREDIC TED: similar to neuropili n-1 isoform 1 | gi 7663221 2,gi 766322 26                | 102,993.80 | 100.00% | 6 | 7 | 8 | 0.09% | 8.67%  | IAPSSFV 2.79<br>SSGPFLF<br>IK             | 1,696.93 |
| Control | 6006 | PREDIC TED: similar to neuropili n-1 isoform 1 | gi 7663221 2,gi 766322 26                | 102,993.80 | 100.00% | 6 | 7 | 8 | 0.09% | 8.67%  | SFEGNN 2.69<br>NYDTPE<br>LR               | 1,655.73 |



|         |      |                                                 |                                          |            |         |   |   |   |       |        |                                              |          |
|---------|------|-------------------------------------------------|------------------------------------------|------------|---------|---|---|---|-------|--------|----------------------------------------------|----------|
| Control | 6006 | PREDICTED:<br>similar to neuropilin-1 isoform 1 | gi 7663221<br>2,gi 766322                | 102,993.80 | 100.00% | 6 | 7 | 8 | 0.09% | 8.67%  | TGPIQDH 4.32<br>TG DGNFI<br>YSQADE<br>NQK    | 2,535.14 |
| Control | 6006 | PREDICTED:<br>similar to neuropilin-1 isoform 1 | gi 7663221<br>2,gi 766322                | 102,993.80 | 100.00% | 6 | 7 | 8 | 0.09% | 8.67%  | TGPIQDH 2.57<br>TG DGNFI<br>YSQADE<br>NQK GK | 2,720.26 |
| Control | 6006 | PREDICTED:<br>similar to pincher isoform 1      | gi 7662746<br>6                          | 61,009.90  | 100.00% | 7 | 7 | 8 | 0.09% | 15.40% | GGTGAD 3.94<br>PVQTVT<br>GGLR                | 1,485.77 |
| Control | 6006 | PREDICTED:<br>similar to pincher isoform 1      | gi 7662746<br>6                          | 61,009.90  | 100.00% | 7 | 7 | 8 | 0.09% | 15.40% | LFEAEA 3.14<br>QDLFR                         | 1,338.67 |
| Control | 6006 | PREDICTED:<br>similar to pincher isoform 1      | gi 7662746<br>6                          | 61,009.90  | 100.00% | 7 | 7 | 8 | 0.09% | 15.40% | LFEAEA 3.88<br>QDLFRDI<br>QSLPQK             | 2,248.16 |
| Control | 6006 | PREDICTED:<br>similar to pincher isoform 1      | gi 7662746<br>6                          | 61,009.90  | 100.00% | 7 | 7 | 8 | 0.09% | 15.40% | LIEAVDN 2.7<br>MLTNK                         | 1,376.71 |
| Control | 6006 | PREDICTED:<br>similar to pincher isoform 1      | gi 7662746<br>6                          | 61,009.90  | 100.00% | 7 | 7 | 8 | 0.09% | 15.40% | LPEIYIQ 2.79<br>LQR                          | 1,272.73 |
| Control | 6006 | PREDICTED:<br>similar to pincher isoform 1      | gi 7662746<br>6                          | 61,009.90  | 100.00% | 7 | 7 | 8 | 0.09% | 15.40% | SISIIDSP 3.85<br>GILSGEK                     | 1,515.83 |
| Control | 6006 | PREDICTED:<br>similar to pincher isoform 1      | gi 7662746<br>6                          | 61,009.90  | 100.00% | 7 | 7 | 8 | 0.09% | 15.40% | YLLEQD 3.3<br>FPGMR                          | 1,384.66 |
| Control | 6006 | RRAS2 protein                                   | gi 1487439<br>16,gi 14994<br>4707        | 23,381.60  | 99.80%  | 2 | 3 | 3 | 0.03% | 13.70% | LDILDTA 3.6<br>GQEEFG<br>AMR                 | 1,781.84 |
| Control | 6006 | RRAS2 protein                                   | gi 1487439<br>16,gi 14994<br>4707        | 23,381.60  | 99.80%  | 2 | 3 | 3 | 0.03% | 13.70% | MNVDQ 2.64<br>AFHELV<br>R                    | 1,474.71 |
| Control | 6006 | adenine nucleotide translocator 2               | gi 1864249<br>6,gi 321893<br>34,gi 74355 | 32,938.60  | 99.80%  | 2 | 3 | 4 | 0.04% | 32.60% | AAAYFGI 3.61<br>YDTAK                        | 1,219.60 |
| Control | 6006 | adenine nucleotide translocator 2               | gi 1864249<br>6,gi 321893<br>34,gi 74355 | 32,938.60  | 99.80%  | 2 | 3 | 4 | 0.04% | 32.60% | DFLAGG 4.27<br>VAAAIK                        | 1,219.67 |
| Control | 6006 | adenine nucleotide translocator 2               | gi 1864249<br>6,gi 321893<br>34,gi 74355 | 32,938.60  | 99.80%  | 2 | 3 | 4 | 0.04% | 32.60% | DKYKQI 3.69<br>FLGGVD<br>K                   | 1,510.83 |

|         |      |                                                                                            |                                                                                                 |           |         |   |   |   |       |        |                                 |          |
|---------|------|--------------------------------------------------------------------------------------------|-------------------------------------------------------------------------------------------------|-----------|---------|---|---|---|-------|--------|---------------------------------|----------|
| Control | 6006 | adenine<br>nucleotide<br>translocation<br>or 2                                             | gi 1864249<br>6,gi 321893<br>34,gi 74355<br>032                                                 | 32,938.60 | 99.80%  | 2 | 3 | 4 | 0.04% | 32.60% | GLYQGF 2.95<br>NVSVQG<br>IIYR   | 1,927.04 |
| Control | 6006 | adenine<br>nucleotide<br>translocation<br>or 2                                             | gi 1864249<br>6,gi 321893<br>34,gi 74355<br>032                                                 | 32,938.60 | 99.80%  | 2 | 3 | 4 | 0.04% | 32.60% | GMGGAF 3.66<br>VLVLYD<br>EIKK   | 1,755.94 |
| Control | 6006 | adenine<br>nucleotide<br>translocation<br>or 2                                             | gi 1864249<br>6,gi 321893<br>34,gi 74355<br>032                                                 | 32,938.60 | 99.80%  | 2 | 3 | 4 | 0.04% | 32.60% | GMGGAF 2.78<br>VLVLYD<br>EIKKFT | 2,004.05 |
| Control | 6006 | adenine<br>nucleotide<br>translocation<br>or 2                                             | gi 1864249<br>6,gi 321893<br>34,gi 74355<br>032                                                 | 32,938.60 | 99.80%  | 2 | 3 | 4 | 0.04% | 32.60% | QIFLGGV 2.39<br>DKR             | 1,132.65 |
| Control | 6006 | adenine<br>nucleotide<br>translocation<br>or 2                                             | gi 1864249<br>6,gi 321893<br>34,gi 74355<br>032                                                 | 32,938.60 | 99.80%  | 2 | 3 | 4 | 0.04% | 32.60% | VKLLLQ 4.01<br>VQHASK           | 1,363.84 |
| Control | 6006 | adenine<br>nucleotide<br>translocation<br>or 2                                             | gi 1864249<br>6,gi 321893<br>34,gi 74355<br>032                                                 | 32,938.60 | 99.80%  | 2 | 3 | 4 | 0.04% | 32.60% | YFPTQA 4.78<br>LNFAFK           | 1,446.74 |
| Control | 6006 | adenine<br>nucleotide<br>translocation<br>or 2                                             | gi 1864249<br>6,gi 321893<br>34,gi 74355<br>032                                                 | 32,938.60 | 99.80%  | 2 | 3 | 4 | 0.04% | 32.60% | YFPTQA 3.72<br>LNFAFK<br>DK     | 1,689.86 |
| Control | 6006 | adenine<br>nucleotide<br>translocation<br>or 2                                             | gi 1864249<br>6,gi 321893<br>34,gi 74355<br>032                                                 | 32,938.60 | 99.80%  | 2 | 3 | 4 | 0.04% | 32.60% | YFPTQA 3.76<br>LNFAFK<br>DKYK   | 1,981.02 |
| Control | 6006 | heme<br>oxygenase<br>(decyclin<br>g) 2                                                     | gi 1644487<br>21                                                                                | 37,538.70 | 100.00% | 3 | 3 | 3 | 0.03% | 9.28%  | LPTQDG 3.33<br>LPVHDG<br>KGDLRK | 1,946.05 |
| Control | 6006 | heme<br>oxygenase<br>(decyclin<br>g) 2                                                     | gi 1644487<br>21                                                                                | 37,538.70 | 100.00% | 3 | 3 | 3 | 0.03% | 9.28%  | YMGDLS 3.01<br>GGQVLK           | 1,283.63 |
| Control | 6006 | heme<br>oxygenase<br>(decyclin<br>g) 2                                                     | gi 1644487<br>21                                                                                | 37,538.70 | 100.00% | 3 | 3 | 3 | 0.03% | 9.28%  | YMGDLS 2.4<br>GGQVLK<br>K       | 1,411.73 |
| Control | 6006 | endothelial<br>differentiation,<br>sphingolipid<br>G-protein-<br>coupled<br>receptor,<br>1 | gi 5985811<br>9,gi 606502<br>08,gi 60650<br>268,gi 6188<br>9066,gi 750<br>70049,gi 88<br>954151 | 42,933.90 | 100.00% | 3 | 3 | 3 | 0.03% | 11.30% | FTRPIIA 5.12<br>GMEFSR          | 1,540.79 |

|         |      |                                                                                                   |                                                             |           |         |   |   |   |       |        |                                                |      |          |
|---------|------|---------------------------------------------------------------------------------------------------|-------------------------------------------------------------|-----------|---------|---|---|---|-------|--------|------------------------------------------------|------|----------|
| Control | 6006 | endothelial differentiation, sphingolipid G-protein-coupled receptor, 1                           | gi 59858119,gi 60650208,gi 61889066,gi 75070049,gi 88954151 | 42,933.90 | 100.00% | 3 | 3 | 3 | 0.03% | 11.30% | SDNSSH<br>PQKDDG<br>DNPETI<br>MSSGNV<br>NSSS   | 4.65 | 2,922.19 |
| Control | 6006 | endothelial differentiation, sphingolipid G-protein-coupled receptor, 1                           | gi 59858119,gi 60650208,gi 61889066,gi 75070049,gi 88954151 | 42,933.90 | 100.00% | 3 | 3 | 3 | 0.03% | 11.30% | SKSDNS<br>SHPQKD<br>DGDNPE<br>TIMSSG<br>NVNSSS | 3.84 | 3,137.32 |
| Control | 6006 | PREDICTED: similar to mKIAA4036 protein isoform 2                                                 | gi 119917518                                                | 67,513.30 | 100.00% | 3 | 3 | 4 | 0.04% | 4.94%  | DAFVYA<br>IK                                   | 2.65 | 926.4982 |
| Control | 6006 | PREDICTED: similar to mKIAA4036 protein isoform 2                                                 | gi 119917518                                                | 67,513.30 | 100.00% | 3 | 3 | 4 | 0.04% | 4.94%  | VNAVPR<br>PIPEK                                | 1.98 | 1,219.72 |
| Control | 6006 | PREDICTED: similar to mKIAA4036 protein isoform 2                                                 | gi 119917518                                                | 67,513.30 | 100.00% | 3 | 3 | 4 | 0.04% | 4.94%  | YLDPSFF<br>QHR                                 | 1.75 | 1,309.63 |
| Control | 6006 | hypothetical protein LOC516334                                                                    | gi 115496252,gi 151556904,gi 95768630                       | 43,057.10 | 99.80%  | 2 | 2 | 3 | 0.03% | 3.62%  | ETAFEE<br>DVQLPR                               | 2.16 | 1,433.69 |
| Control | 6006 | hypothetical protein LOC516334                                                                    | gi 115496252,gi 151556904,gi 95768630                       | 43,057.10 | 99.80%  | 2 | 2 | 3 | 0.03% | 3.62%  | MRETAF<br>EEDVQL<br>PR                         | 2.94 | 1,736.83 |
| Control | 6006 | PREDICTED: similar to Transmembrane domain-containing protein 2 precursor (Membrane protein p24A) | gi 194674620                                                | 22,715.40 | 99.80%  | 2 | 3 | 4 | 0.04% | 12.40% | IVMFTID<br>IGEAPK                              | 2.37 | 1,449.77 |

|         |      |                                                                                                                                           |            |           |         |   |    |    |       |        |                                       |      |          |
|---------|------|-------------------------------------------------------------------------------------------------------------------------------------------|------------|-----------|---------|---|----|----|-------|--------|---------------------------------------|------|----------|
| Control | 6006 | PREDICTED:<br>similar to<br>Transmembrane<br>emp24<br>domain-<br>containing<br>protein<br>2<br>precursor<br>(Membrane<br>protein<br>p24A) | gi 1946746 | 22,715.40 | 99.80%  | 2 | 3  | 4  | 0.04% | 12.40% | YTFAAH<br>MDGTY<br>K                  | 2.11 | 1,420.62 |
| Control | 6006 | PREDICTED:<br>integrin,<br>beta 3<br>(platelet<br>glycoprotein<br>IIIa,<br>antigen<br>CD61)<br>isoform 1                                  | gi 7667065 | 86,518.30 | 100.00% | 7 | 11 | 14 | 0.15% | 8.16%  | EATSTFT<br>NITYR                      | 2.57 | 1,403.68 |
| Control | 6006 | PREDICTED:<br>integrin,<br>beta 3<br>(platelet<br>glycoprotein<br>IIIa,<br>antigen<br>CD61)<br>isoform 1                                  | gi 7667065 | 86,518.30 | 100.00% | 7 | 11 | 14 | 0.15% | 8.16%  | EATSTFT<br>NITYRT                     | 2.72 | 1,561.75 |
| Control | 6006 | PREDICTED:<br>integrin,<br>beta 3<br>(platelet<br>glycoprotein<br>IIIa,<br>antigen<br>CD61)<br>isoform 1                                  | gi 7667065 | 86,518.30 | 100.00% | 7 | 11 | 14 | 0.15% | 8.16%  | GTGDSS<br>QITQVSP<br>QR               | 3.36 | 1,560.76 |
| Control | 6006 | PREDICTED:<br>integrin,<br>beta 3<br>(platelet<br>glycoprotein<br>IIIa,<br>antigen<br>CD61)<br>isoform 1                                  | gi 7667065 | 86,518.30 | 100.00% | 7 | 11 | 14 | 0.15% | 8.16%  | HVLTLT<br>DQVTR                       | 3.71 | 1,282.71 |
| Control | 6006 | PREDICTED:<br>integrin,<br>beta 3<br>(platelet<br>glycoprotein<br>IIIa,<br>antigen<br>CD61)<br>isoform 1                                  | gi 7667065 | 86,518.30 | 100.00% | 7 | 11 | 14 | 0.15% | 8.16%  | ILEARPL<br>SDKGTG<br>DSSQITQ<br>VSPQR | 6.12 | 2,683.40 |

|         |      |                                                                                                    |                                                                  |           |         |   |    |    |       |        |                       |      |          |
|---------|------|----------------------------------------------------------------------------------------------------|------------------------------------------------------------------|-----------|---------|---|----|----|-------|--------|-----------------------|------|----------|
| Control | 6006 | PREDICTED:<br>integrin,<br>beta 3<br>(platelet<br>glycoprotein IIIa,<br>antigen CD61)<br>isoform 1 | gi 7667065<br>7                                                  | 86,518.30 | 100.00% | 7 | 11 | 14 | 0.15% | 8.16%  | LRPDDSKIFSVQVR        | 3.2  | 1,659.92 |
| Control | 6006 | PREDICTED:<br>integrin,<br>beta 3<br>(platelet<br>glycoprotein IIIa,<br>antigen CD61)<br>isoform 1 | gi 7667065<br>7                                                  | 86,518.30 | 100.00% | 7 | 11 | 14 | 0.15% | 8.16%  | PLSDKGTGDSSQITQVSPQVR | 4.84 | 2,101.05 |
| Control | 6006 | heat shock<br>90kDa protein 1,<br>beta                                                             | gi 1186018<br>68,gi 34392<br>345,gi 7507<br>2499,gi 957<br>67684 | 83,238.20 | 100.00% | 6 | 7  | 9  | 0.10% | 12.40% | ADLVNNLGTIAK          | 3.48 | 1,228.69 |
| Control | 6006 | heat shock<br>90kDa protein 1,<br>beta                                                             | gi 1186018<br>68,gi 34392<br>345,gi 7507<br>2499,gi 957<br>67684 | 83,238.20 | 100.00% | 6 | 7  | 9  | 0.10% | 12.40% | ALLFIPR               | 1.75 | 829.5295 |
| Control | 6006 | heat shock<br>90kDa protein 1,<br>beta                                                             | gi 1186018<br>68,gi 34392<br>345,gi 7507<br>2499,gi 957<br>67684 | 83,238.20 | 100.00% | 6 | 7  | 9  | 0.10% | 12.40% | ELISNASDALDKIR        | 3.84 | 1,544.83 |
| Control | 6006 | heat shock<br>90kDa protein 1,<br>beta                                                             | gi 1186018<br>68,gi 34392<br>345,gi 7507<br>2499,gi 957<br>67684 | 83,238.20 | 100.00% | 6 | 7  | 9  | 0.10% | 12.40% | GVVDSEDLPLNISR        | 3.57 | 1,513.79 |
| Control | 6006 | heat shock<br>90kDa protein 1,<br>beta                                                             | gi 1186018<br>68,gi 34392<br>345,gi 7507<br>2499,gi 957<br>67684 | 83,238.20 | 100.00% | 6 | 7  | 9  | 0.10% | 12.40% | HLEINPDHPIVETLR       | 3.72 | 1,782.95 |
| Control | 6006 | heat shock<br>90kDa protein 1,<br>beta                                                             | gi 1186018<br>68,gi 34392<br>345,gi 7507<br>2499,gi 957<br>67684 | 83,238.20 | 100.00% | 6 | 7  | 9  | 0.10% | 12.40% | NPDDITQEEYGEFYK       | 3    | 1,847.80 |
| Control | 6006 | heat shock<br>90kDa protein 1,<br>beta                                                             | gi 1186018<br>68,gi 34392<br>345,gi 7507<br>2499,gi 957<br>67684 | 83,238.20 | 100.00% | 6 | 7  | 9  | 0.10% | 12.40% | TLTLVDTGIGMTK         | 4.22 | 1,365.73 |
| Control | 6006 | Solute carrier<br>family 1<br>(neutral amino<br>acid transporter),<br>member 5                     | gi 1153052<br>16,gi 15145<br>909,gi 2154<br>1958,gi 278<br>07087 | 56,431.20 | 99.90%  | 2 | 2  | 2  | 0.02% | 4.45%  | EVLDSFLDLVR           | 2.37 | 1,305.71 |

|         |      |                                                                     |                                                  |           |         |   |   |   |       |        |                      |      |          |
|---------|------|---------------------------------------------------------------------|--------------------------------------------------|-----------|---------|---|---|---|-------|--------|----------------------|------|----------|
| Control | 6006 | Solute carrier family 1 (neutral amino acid transporter), member 5  | gi 115305216,gi 15145909,gi 21541958,gi 27807087 | 56,431.20 | 99.90%  | 2 | 2 | 2 | 0.02% | 4.45%  | NIFPSNL VSAAFR       | 2.69 | 1,435.77 |
| Control | 6006 | PREDICTED: protein disulfide isomerase family A, member 6 isoform 7 | gi 119903961,gi 151553573                        | 64,497.70 | 100.00% | 5 | 5 | 5 | 0.05% | 10.50% | GSFSEQ GINEFLR       | 3.07 | 1,483.72 |
| Control | 6006 | PREDICTED: protein disulfide isomerase family A, member 6 isoform 7 | gi 119903961,gi 151553573                        | 64,497.70 | 100.00% | 5 | 5 | 5 | 0.05% | 10.50% | GSTAPV GGGAFP TISTR  | 2.97 | 1,575.81 |
| Control | 6006 | PREDICTED: protein disulfide isomerase family A, member 6 isoform 7 | gi 119903961,gi 151553573                        | 64,497.70 | 100.00% | 5 | 5 | 5 | 0.05% | 10.50% | IFQKGES PVDYDG GR    | 4.98 | 1,667.80 |
| Control | 6006 | PREDICTED: protein disulfide isomerase family A, member 6 isoform 7 | gi 119903961,gi 151553573                        | 64,497.70 | 100.00% | 5 | 5 | 5 | 0.05% | 10.50% | LAAVDA TVNQVL ASR    | 2.82 | 1,527.85 |
| Control | 6006 | PREDICTED: protein disulfide isomerase family A, member 6 isoform 7 | gi 119903961,gi 151553573                        | 64,497.70 | 100.00% | 5 | 5 | 5 | 0.05% | 10.50% | VKLAADV DATVNQ VLASR | 3.17 | 1,755.01 |
| Control | 6006 | Deoxyribonuclease 71 I-like 1                                       | gi 151553571                                     | 35,175.30 | 100.00% | 3 | 5 | 5 | 0.05% | 13.30% | IVLHGE HLQSLLR       | 3.21 | 1,514.88 |
| Control | 6006 | Deoxyribonuclease 71 I-like 1                                       | gi 151553571                                     | 35,175.30 | 100.00% | 3 | 5 | 5 | 0.05% | 13.30% | SKVLPSL VLVPLH TTPK  | 3.58 | 1,829.13 |
| Control | 6006 | Deoxyribonuclease 71 I-like 1                                       | gi 151553571                                     | 35,175.30 | 100.00% | 3 | 5 | 5 | 0.05% | 13.30% | VAREPV LDTLVK        | 3.36 | 1,339.79 |

|         |      |                                                                                  |                                                                                               |            |         |   |   |    |       |        |                                                                   |      |          |
|---------|------|----------------------------------------------------------------------------------|-----------------------------------------------------------------------------------------------|------------|---------|---|---|----|-------|--------|-------------------------------------------------------------------|------|----------|
| Control | 6011 | TIMM23 protein                                                                   | gi 1340251<br>49,gi 13994<br>7578,gi 215<br>274655                                            | 21,809.90  | 100.00% | 3 | 3 | 4  | 0.03% | 32.50% | NVQILN<br>MVTR                                                    | 3.29 | 1,203.65 |
| Control | 6011 | TIMM23 protein                                                                   | gi 1340251<br>49,gi 13994<br>7578,gi 215<br>274655                                            | 21,809.90  | 100.00% | 3 | 3 | 4  | 0.03% | 32.50% | TTGGLA<br>GFFGAG<br>GAGYSH<br>ADLAGV<br>PLTGMN<br>PLSPYLN<br>VDPR | 5.64 | 4,034.97 |
| Control | 6011 | TIMM23 protein                                                                   | gi 1340251<br>49,gi 13994<br>7578,gi 215<br>274655                                            | 21,809.90  | 100.00% | 3 | 3 | 4  | 0.03% | 32.50% | YLVQDT<br>DEFILPT<br>GANK                                         | 3.72 | 1,923.97 |
| Control | 6011 | TMEM15 protein                                                                   | gi 1337779<br>23,gi 13408<br>5844,gi 146<br>186960,gi 2<br>18551717                           | 38,121.60  | 99.80%  | 2 | 3 | 3  | 0.02% | 6.84%  | RYDVGA<br>PSSITISL<br>PGTDPQ<br>DAER                              | 3.29 | 2,545.25 |
| Control | 6011 | TMEM15 protein                                                                   | gi 1337779<br>23,gi 13408<br>5844,gi 146<br>186960,gi 2<br>18551717                           | 38,121.60  | 99.80%  | 2 | 3 | 3  | 0.02% | 6.84%  | YDVGAP<br>SSITISLP<br>GTDPQD<br>AER                               | 4.31 | 2,389.15 |
| Control | 6011 | Chain B, Subcomp lex Of The Stator Of Bovine Mitochondrial Atp Synthase          | gi 1105910<br>27,gi 11059<br>1030,gi 114<br>686,gi 2780<br>7305,gi 599<br>873,gi 7435<br>6487 | 18,544.10  | 100.00% | 3 | 5 | 8  | 0.06% | 20.60% | IQEYEKE<br>LEK                                                    | 3.6  | 1,308.67 |
| Control | 6011 | Chain B, Subcomp lex Of The Stator Of Bovine Mitochondrial Atp Synthase          | gi 1105910<br>27,gi 11059<br>1030,gi 114<br>686,gi 2780<br>7305,gi 599<br>873,gi 7435<br>6487 | 18,544.10  | 100.00% | 3 | 5 | 8  | 0.06% | 20.60% | IQEYEKE<br>LEKMR                                                  | 2.75 | 1,611.80 |
| Control | 6011 | Chain B, Subcomp lex Of The Stator Of Bovine Mitochondrial Atp Synthase          | gi 1105910<br>27,gi 11059<br>1030,gi 114<br>686,gi 2780<br>7305,gi 599<br>873,gi 7435<br>6487 | 18,544.10  | 100.00% | 3 | 5 | 8  | 0.06% | 20.60% | NIIPFDQ<br>MTIEDL<br>NEVFPE<br>TK                                 | 3.5  | 2,509.22 |
| Control | 6011 | PREDICTED: integrin, alpha 5 (fibronectin receptor, alpha polypeptide) isoform 3 | gi 1946670<br>41                                                                              | 119,589.00 | 100.00% | 7 | 9 | 17 | 0.13% | 12.90% | AQILLDC<br>GEDNIC<br>VPDLQL<br>EVFGEQ<br>NHVYLG<br>DK             | 4.7  | 3,687.77 |

|         |      |                                                                                  |            |            |         |   |   |    |       |        |                                                |      |          |
|---------|------|----------------------------------------------------------------------------------|------------|------------|---------|---|---|----|-------|--------|------------------------------------------------|------|----------|
| Control | 6011 | PREDICTED: integrin, alpha 5 (fibronectin receptor, alpha polypeptide) isoform 3 | gi 1946670 | 119,589.00 | 100.00% | 7 | 9 | 17 | 0.13% | 12.90% | DLDGNG<br>YPLDIVG<br>SFGVVK                    | 3.64 | 1,980.96 |
| Control | 6011 | PREDICTED: integrin, alpha 5 (fibronectin receptor, alpha polypeptide) isoform 3 | gi 1946670 | 119,589.00 | 100.00% | 7 | 9 | 17 | 0.13% | 12.90% | FGSSLTP<br>LGDLDQ<br>DGYNDV<br>AIGAAF<br>GGENR | 2.76 | 3,056.42 |
| Control | 6011 | PREDICTED: integrin, alpha 5 (fibronectin receptor, alpha polypeptide) isoform 3 | gi 1946670 | 119,589.00 | 100.00% | 7 | 9 | 17 | 0.13% | 12.90% | LAGMEP<br>TPTLTLT<br>GQDEFGR                   | 5.02 | 2,150.04 |
| Control | 6011 | PREDICTED: integrin, alpha 5 (fibronectin receptor, alpha polypeptide) isoform 3 | gi 1946670 | 119,589.00 | 100.00% | 7 | 9 | 17 | 0.13% | 12.90% | QATLTQ<br>LLIQNG<br>AR                         | 3.64 | 1,627.91 |
| Control | 6011 | PREDICTED: integrin, alpha 5 (fibronectin receptor, alpha polypeptide) isoform 3 | gi 1946670 | 119,589.00 | 100.00% | 7 | 9 | 17 | 0.13% | 12.90% | TIQDFDQ<br>ILSK                                | 2.97 | 1,339.73 |
| Control | 6011 | PREDICTED: integrin, alpha 5 (fibronectin receptor, alpha polypeptide) isoform 3 | gi 1946670 | 119,589.00 | 100.00% | 7 | 9 | 17 | 0.13% | 12.90% | VTAPPE<br>AEYSGL<br>VR                         | 2.95 | 1,488.77 |



|         |      |               |                                                                                       |           |         |   |   |    |       |        |                                 |      |          |
|---------|------|---------------|---------------------------------------------------------------------------------------|-----------|---------|---|---|----|-------|--------|---------------------------------|------|----------|
| Control | 6011 | caveolin-1    | gi 1840144, gi 2493547, gi 2780671 5, gi 383227 01, gi 56181 138                      | 20,577.50 | 100.00% | 4 | 7 | 15 | 0.12% | 29.20% | AMAEE MNEKQV YDAHTK             | 3.19 | 2,010.89 |
| Control | 6011 | caveolin-1    | gi 1840144, gi 2493547, gi 2780671 5, gi 383227 01, gi 56181 138                      | 20,577.50 | 100.00% | 4 | 7 | 15 | 0.12% | 29.20% | ASFTTFT VTK                     | 2.83 | 1,102.58 |
| Control | 6011 | caveolin-1    | gi 1840144, gi 2493547, gi 2780671 5, gi 383227 01, gi 56181 138                      | 20,577.50 | 100.00% | 4 | 7 | 15 | 0.12% | 29.20% | YVDSEG HLYTVPI R                | 3.09 | 1,648.83 |
| Control | 6011 | caveolin-1    | gi 1840144, gi 2493547, gi 2780671 5, gi 383227 01, gi 56181 138                      | 20,577.50 | 100.00% | 4 | 7 | 15 | 0.12% | 29.20% | YVDSEG HLYTVPI REQNI YKPNNK     | 5.27 | 2,934.47 |
| Control | 6011 | RTN3 protein  | gi 1153050 93, gi 12213 2179, gi 146 231798, gi 1 51554368, gi 32880223, gi 3832759 4 | 25,478.60 | 100.00% | 3 | 5 | 5  | 0.04% | 10.50% | LFLVEDL VDSLK                   | 3.53 | 1,390.78 |
| Control | 6011 | RTN3 protein  | gi 1153050 93, gi 12213 2179, gi 146 231798, gi 1 51554368, gi 32880223, gi 3832759 4 | 25,478.60 | 100.00% | 3 | 5 | 5  | 0.04% | 10.50% | TQIDHY VGIAR                    | 3.19 | 1,272.67 |
| Control | 6011 | RTN3 protein  | gi 1153050 93, gi 12213 2179, gi 146 231798, gi 1 51554368, gi 32880223, gi 3832759 4 | 25,478.60 | 100.00% | 3 | 5 | 5  | 0.04% | 10.50% | YKTQID HYVGIA R                 | 3.13 | 1,563.83 |
| Control | 6011 | LMAN2 protein | gi 1515538 75, gi 15537 2333                                                          | 40,385.10 | 100.00% | 5 | 6 | 11 | 0.09% | 20.30% | DNFHGL AIFLDY PNDETT ER         | 4.92 | 2,468.14 |
| Control | 6011 | LMAN2 protein | gi 1515538 75, gi 15537 2333                                                          | 40,385.10 | 100.00% | 5 | 6 | 11 | 0.09% | 20.30% | DNVDDP TGNFR                    | 2.96 | 1,249.54 |
| Control | 6011 | LMAN2 protein | gi 1515538 75, gi 15537 2333                                                          | 40,385.10 | 100.00% | 5 | 6 | 11 | 0.09% | 20.30% | DRLVPG PVFGSK                   | 2.28 | 1,271.71 |
| Control | 6011 | LMAN2 protein | gi 1515538 75, gi 15537 2333                                                          | 40,385.10 | 100.00% | 5 | 6 | 11 | 0.09% | 20.30% | LPTGY Y FGASAG TGDLSD NHDIISM K | 5.74 | 2,746.27 |
| Control | 6011 | LMAN2 protein | gi 1515538 75, gi 15537 2333                                                          | 40,385.10 | 100.00% | 5 | 6 | 11 | 0.09% | 20.30% | SPKDNV DDPTGN FR                | 3.72 | 1,561.72 |

|         |      |                                                                                                                                                                                                              |                                                                                              |           |         |   |   |   |       |       |              |      |          |
|---------|------|--------------------------------------------------------------------------------------------------------------------------------------------------------------------------------------------------------------|----------------------------------------------------------------------------------------------|-----------|---------|---|---|---|-------|-------|--------------|------|----------|
| Control | 6011 | RPS9 protein                                                                                                                                                                                                 | gi 151554648,gi 151554779,gi 15155372029,gi 189044386,gi 190576593,gi 197215709,gi 217418300 | 22,574.50 | 100.00% | 2 | 2 | 3 | 0.02% | 8.76% | LFEGNA LLR   | 2.76 | 1,032.58 |
| Control | 6011 | RPS9 protein                                                                                                                                                                                                 | gi 151554648,gi 151554779,gi 15155372029,gi 189044386,gi 190576593,gi 197215709,gi 217418300 | 22,574.50 | 100.00% | 2 | 2 | 3 | 0.02% | 8.76% | LIGEYGLR     | 2.53 | 920.5201 |
| Control | 6011 | PREDICTED: similar to Splicing factor, proline- and glutamine-rich (Polypyrimidine tract-binding protein-associate d-splicing factor) (PTB-associate d-splicing factor) (PSF) (DNA-binding p52/p100 complex, | gi 194665922                                                                                 | 76,230.60 | 100.00% | 3 | 3 | 3 | 0.02% | 7.21% | FATHAA ALSVR | 3.19 | 1,143.63 |

|         |      |                                                                                                                                                                                                              |            |           |         |   |   |   |       |        |                                           |          |
|---------|------|--------------------------------------------------------------------------------------------------------------------------------------------------------------------------------------------------------------|------------|-----------|---------|---|---|---|-------|--------|-------------------------------------------|----------|
| Control | 6011 | PREDICTED: similar to Splicing factor, proline- and glutamine-rich (Polypyrimidine tract-binding protein-associate d-splicing factor) (PTB-associate d-splicing factor) (PSF) (DNA-binding p52/p100 complex, | gi 1946659 | 76,230.60 | 100.00% | 3 | 3 | 3 | 0.02% | 7.21%  | LFVGNL 2.03<br>PADITED<br>EFKR            | 1,964.01 |
| Control | 6011 | PREDICTED: similar to Splicing factor, proline- and glutamine-rich (Polypyrimidine tract-binding protein-associate d-splicing factor) (PTB-associate d-splicing factor) (PSF) (DNA-binding p52/p100 complex, | gi 1946659 | 76,230.60 | 100.00% | 3 | 3 | 3 | 0.02% | 7.21%  | NLSPYV 2.87<br>SNELLEEE<br>AFSQFGP<br>IER | 2,639.30 |
| Control | 6011 | PREDICTED: similar to polypeptide of N-acetylgalactosaminyltransferase 2                                                                                                                                     | gi 1199183 | 64,740.20 | 100.00% | 4 | 4 | 4 | 0.03% | 12.60% | EIILVDD 3.82<br>YSNDPE<br>DGALLG<br>K     | 2,176.07 |
| Control | 6011 | PREDICTED: similar to polypeptide of N-acetylgalactosaminyltransferase 2                                                                                                                                     | gi 1199183 | 64,740.20 | 100.00% | 4 | 4 | 4 | 0.03% | 12.60% | NKFNQV 2.59<br>ESDKLR                     | 1,477.78 |

|         |      |                                                                                   |                                                    |            |         |    |    |    |       |        |                                       |      |          |
|---------|------|-----------------------------------------------------------------------------------|----------------------------------------------------|------------|---------|----|----|----|-------|--------|---------------------------------------|------|----------|
| Control | 6011 | PREDICTED:<br>similar to<br>polypeptide<br>of N-acetylgalactosaminyltransferase 2 | gi 1199183<br>73                                   | 64,740.20  | 100.00% | 4  | 4  | 4  | 0.03% | 12.60% | QHPYTF<br>PGGSGT<br>V FAR             | 4.07 | 1,721.84 |
| Control | 6011 | PREDICTED:<br>similar to<br>polypeptide<br>of N-acetylgalactosaminyltransferase 2 | gi 1199183<br>73                                   | 64,740.20  | 100.00% | 4  | 4  | 4  | 0.03% | 12.60% | VVSPIID<br>VINMDN<br>FQYVGA<br>SADLK  | 2.97 | 2,624.33 |
| Control | 6011 | ATPase, Na <sup>+</sup> /K <sup>+</sup> transporting, alpha 1 polypeptide         | gi 1153052<br>84,gi 11600<br>3819,gi 122<br>132194 | 112,627.60 | 100.00% | 19 | 29 | 53 | 0.41% | 23.60% | ADIGVA<br>MGIAGS<br>DVSK              | 4.06 | 1,506.75 |
| Control | 6011 | ATPase, Na <sup>+</sup> /K <sup>+</sup> transporting, alpha 1 polypeptide         | gi 1153052<br>84,gi 11600<br>3819,gi 122<br>132194 | 112,627.60 | 100.00% | 19 | 29 | 53 | 0.41% | 23.60% | AVAGDA<br>SESALLK                     | 4.11 | 1,231.65 |
| Control | 6011 | ATPase, Na <sup>+</sup> /K <sup>+</sup> transporting, alpha 1 polypeptide         | gi 1153052<br>84,gi 11600<br>3819,gi 122<br>132194 | 112,627.60 | 100.00% | 19 | 29 | 53 | 0.41% | 23.60% | AVFQAN<br>QDNLPIK                     | 4.02 | 1,570.86 |
| Control | 6011 | ATPase, Na <sup>+</sup> /K <sup>+</sup> transporting, alpha 1 polypeptide         | gi 1153052<br>84,gi 11600<br>3819,gi 122<br>132194 | 112,627.60 | 100.00% | 19 | 29 | 53 | 0.41% | 23.60% | AVFQAN<br>QDNLPIK<br>KR               | 4.06 | 1,726.96 |
| Control | 6011 | ATPase, Na <sup>+</sup> /K <sup>+</sup> transporting, alpha 1 polypeptide         | gi 1153052<br>84,gi 11600<br>3819,gi 122<br>132194 | 112,627.60 | 100.00% | 19 | 29 | 53 | 0.41% | 23.60% | DMTPEQ<br>LDDILK                      | 2.47 | 1,417.69 |
| Control | 6011 | ATPase, Na <sup>+</sup> /K <sup>+</sup> transporting, alpha 1 polypeptide         | gi 1153052<br>84,gi 11600<br>3819,gi 122<br>132194 | 112,627.60 | 100.00% | 19 | 29 | 53 | 0.41% | 23.60% | EQPLDE<br>ELKDAF<br>QNAYLE<br>LGGLGER | 3.6  | 2,834.38 |
| Control | 6011 | ATPase, Na <sup>+</sup> /K <sup>+</sup> transporting, alpha 1 polypeptide         | gi 1153052<br>84,gi 11600<br>3819,gi 122<br>132194 | 112,627.60 | 100.00% | 19 | 29 | 53 | 0.41% | 23.60% | GVGIISE<br>GNETVE<br>DIAAR            | 4.56 | 1,829.92 |

|         |      |                                                  |                                        |            |         |    |    |    |       |        |                                          |          |
|---------|------|--------------------------------------------------|----------------------------------------|------------|---------|----|----|----|-------|--------|------------------------------------------|----------|
| Control | 6011 | ATPase, Na+/K+ transporting, alpha 1 polypeptide | gi 115305284.gi 116003819.gi 122132194 | 112,627.60 | 100.00% | 19 | 29 | 53 | 0.41% | 23.60% | IVEIPFNS 2.93<br>TNK                     | 1,261.68 |
| Control | 6011 | ATPase, Na+/K+ transporting, alpha 1 polypeptide | gi 115305284.gi 116003819.gi 122132194 | 112,627.60 | 100.00% | 19 | 29 | 53 | 0.41% | 23.60% | KADIGV 5.55<br>AMGIAG<br>SDVSK           | 1,634.84 |
| Control | 6011 | ATPase, Na+/K+ transporting, alpha 1 polypeptide | gi 115305284.gi 116003819.gi 122132194 | 112,627.60 | 100.00% | 19 | 29 | 53 | 0.41% | 23.60% | LNIPVSQ 3.98<br>VNPR                     | 1,236.71 |
| Control | 6011 | ATPase, Na+/K+ transporting, alpha 1 polypeptide | gi 115305284.gi 116003819.gi 122132194 | 112,627.60 | 100.00% | 19 | 29 | 53 | 0.41% | 23.60% | LSLDEL 2.43<br>HR                        | 982.5317 |
| Control | 6011 | ATPase, Na+/K+ transporting, alpha 1 polypeptide | gi 115305284.gi 116003819.gi 122132194 | 112,627.60 | 100.00% | 19 | 29 | 53 | 0.41% | 23.60% | MSINAE 4.71<br>EVVVGD<br>LVEVK           | 1,846.95 |
| Control | 6011 | ATPase, Na+/K+ transporting, alpha 1 polypeptide | gi 115305284.gi 116003819.gi 122132194 | 112,627.60 | 100.00% | 19 | 29 | 53 | 0.41% | 23.60% | NMVPQQ 3.28<br>ALVIR                     | 1,284.71 |
| Control | 6011 | ATPase, Na+/K+ transporting, alpha 1 polypeptide | gi 115305284.gi 116003819.gi 122132194 | 112,627.60 | 100.00% | 19 | 29 | 53 | 0.41% | 23.60% | QAADMI 3.44<br>LLDDNF<br>ASIVTGV<br>EEGR | 2,480.20 |
| Control | 6011 | ATPase, Na+/K+ transporting, alpha 1 polypeptide | gi 115305284.gi 116003819.gi 122132194 | 112,627.60 | 100.00% | 19 | 29 | 53 | 0.41% | 23.60% | QGAIVA 4.99<br>VTGDGV<br>NDSPAL<br>K     | 1,811.95 |
| Control | 6011 | ATPase, Na+/K+ transporting, alpha 1 polypeptide | gi 115305284.gi 116003819.gi 122132194 | 112,627.60 | 100.00% | 19 | 29 | 53 | 0.41% | 23.60% | QGAIVA 3.67<br>VTGDGV<br>NDSPAL<br>KK    | 1,940.05 |
| Control | 6011 | ATPase, Na+/K+ transporting, alpha 1 polypeptide | gi 115305284.gi 116003819.gi 122132194 | 112,627.60 | 100.00% | 19 | 29 | 53 | 0.41% | 23.60% | SPDFTNE 4.46<br>NPLETR                   | 1,519.70 |

|         |      |                                                       |                                                             |            |         |    |    |    |       |        |                                  |      |          |
|---------|------|-------------------------------------------------------|-------------------------------------------------------------|------------|---------|----|----|----|-------|--------|----------------------------------|------|----------|
| Control | 6011 | ATPase, Na+/K+ transport protein, alpha 1 polypeptide | gi 115305284,gi 116003819,gi 122132194                      | 112,627.60 | 100.00% | 19 | 29 | 53 | 0.41% | 23.60% | VDNSSL<br>TGESEP<br>QTR          | 3.92 | 1,619.75 |
| Control | 6011 | ATPase, Na+/K+ transport protein, alpha 1 polypeptide | gi 115305284,gi 116003819,gi 122132194                      | 112,627.60 | 100.00% | 19 | 29 | 53 | 0.41% | 23.60% | VIMVTG<br>DHPITAK                | 4.45 | 1,397.75 |
| Control | 6011 | PTPLAD 1 protein                                      | gi 154425645,gi 157074148,gi 166199295                      | 43,116.60  | 99.80%  | 2  | 3  | 4  | 0.03% | 8.56%  | FSFTLPY<br>PVK                   | 2.21 | 1,198.65 |
| Control | 6011 | PTPLAD 1 protein                                      | gi 154425645,gi 157074148,gi 166199295                      | 43,116.60  | 99.80%  | 2  | 3  | 4  | 0.03% | 8.56%  | VELSDV<br>QNPASI<br>TENVLH<br>FK | 3.73 | 2,353.24 |
| Control | 6011 | NADH dehydrogenase                                    | gi 256,gi 28461255,gi 400533,gi 73587329                    | 20,946.90  | 99.80%  | 2  | 3  | 3  | 0.02% | 16.50% | AFDLLV<br>DRPVTL<br>VR           | 2.32 | 1,613.94 |
| Control | 6011 | NADH dehydrogenase                                    | gi 256,gi 28461255,gi 400533,gi 73587329                    | 20,946.90  | 99.80%  | 2  | 3  | 3  | 0.02% | 16.50% | DYKVDQ<br>EIVNIIQE<br>R          | 4.21 | 1,861.97 |
| Control | 6011 | ribosomal protein L18                                 | gi 59858459,gi 62752012,gi 75060915,gi 75775560,gi 89573893 | 21,518.10  | 100.00% | 3  | 3  | 7  | 0.05% | 18.10% | ILTFDQL<br>ALDSPK                | 4.41 | 1,460.80 |
| Control | 6011 | ribosomal protein L18                                 | gi 59858459,gi 62752012,gi 75060915,gi 75775560,gi 89573893 | 21,518.10  | 100.00% | 3  | 3  | 7  | 0.05% | 18.10% | TNRPPLS<br>LSR                   | 3.8  | 1,140.65 |
| Control | 6011 | ribosomal protein L18                                 | gi 59858459,gi 62752012,gi 75060915,gi 75775560,gi 89573893 | 21,518.10  | 100.00% | 3  | 3  | 7  | 0.05% | 18.10% | TNSTFN<br>QVVLK                  | 2.6  | 1,250.67 |

|         |      |                                                                                                                                                                                                                                                                                                                            |           |         |   |   |   |       |        |                      |          |
|---------|------|----------------------------------------------------------------------------------------------------------------------------------------------------------------------------------------------------------------------------------------------------------------------------------------------------------------------------|-----------|---------|---|---|---|-------|--------|----------------------|----------|
| Control | 6011 | RecName gi 1098919<br>: 34,gi 28461<br>Full=Isoc 205,gi 430,<br>irate gi 7358732<br>dehydrog 3<br>enase<br>[NADP],<br>mitochon<br>drial;<br>Short=ID<br>H;<br>AltName:<br>Full=Oxa<br>losuccina<br>te<br>decarbox<br>ylase;<br>AltName:<br>Full=NA<br>DP(+)-<br>specific<br>ICDH;<br>AltName:<br>Full=IDP<br>;<br>AltName: | 50,807.00 | 100.00% | 5 | 7 | 7 | 0.05% | 17.00% | FKDIFQA 3.53<br>IFEK | 1,385.75 |
| Control | 6011 | RecName gi 1098919<br>: 34,gi 28461<br>Full=Isoc 205,gi 430,<br>irate gi 7358732<br>dehydrog 3<br>enase<br>[NADP],<br>mitochon<br>drial;<br>Short=ID<br>H;<br>AltName:<br>Full=Oxa<br>losuccina<br>te<br>decarbox<br>ylase;<br>AltName:<br>Full=NA<br>DP(+)-<br>specific<br>ICDH;<br>AltName:<br>Full=IDP<br>;<br>AltName: | 50,807.00 | 100.00% | 5 | 7 | 7 | 0.05% | 17.00% | GKLDGN 3.32<br>QDLIR | 1,228.66 |

|         |      |                                                                                                                                                                                                                                      |           |         |   |   |   |       |        |                         |          |
|---------|------|--------------------------------------------------------------------------------------------------------------------------------------------------------------------------------------------------------------------------------------|-----------|---------|---|---|---|-------|--------|-------------------------|----------|
| Control | 6011 | RecName gi 1098919 : 34,gi 28461 Full=Isoc itrate gi 7358732 dehydrog 3 enase [NADP], mitochon drial; Short=ID H; AltName: Full=Oxa losuccina te decarbox ylase; AltName: Full=NA DP(+)- specific ICDH; AltName: Full=IDP ; AltName: | 50,807.00 | 100.00% | 5 | 7 | 7 | 0.05% | 17.00% | LNEHFL 3.87 NTSDFL DTIK | 1,906.95 |
| Control | 6011 | RecName gi 1098919 : 34,gi 28461 Full=Isoc itrate gi 7358732 dehydrog 3 enase [NADP], mitochon drial; Short=ID H; AltName: Full=Oxa losuccina te decarbox ylase; AltName: Full=NA DP(+)- specific ICDH; AltName: Full=IDP ; AltName: | 50,807.00 | 100.00% | 5 | 7 | 7 | 0.05% | 17.00% | TIEAEAA 4.4 HGTVTR      | 1,355.69 |



|         |      |                                                                                                                                                                                                                                                                                                |                                                                                                                                 |           |         |   |    |       |        |                                            |                                    |          |          |
|---------|------|------------------------------------------------------------------------------------------------------------------------------------------------------------------------------------------------------------------------------------------------------------------------------------------------|---------------------------------------------------------------------------------------------------------------------------------|-----------|---------|---|----|-------|--------|--------------------------------------------|------------------------------------|----------|----------|
| Control | 6011 | RecName<br>: gi1098919<br>Full=Isoc<br>trate gi7358732<br>dehydrog<br>enase<br>[NADP],<br>mitochon<br>drial;<br>Short=ID<br>H;<br>AltName:<br>Full=Oxa<br>losuccina<br>te<br>decarbox<br>ylase;<br>AltName:<br>Full=NA<br>DP(+)-<br>specific<br>ICDH;<br>AltName:<br>Full=IDP<br>;<br>AltName: | 50,807.00                                                                                                                       | 100.00%   | 5       | 7 | 7  | 0.05% | 17.00% | YFDLGL<br>PNRDQT<br>NDQVTI<br>DSALAT<br>QK | 4.59                               | 2,923.44 |          |
| Control | 6011 | endotheli<br>n-<br>convertin<br>g enzyme                                                                                                                                                                                                                                                       | gi1092971,<br>gi1248291<br>88,gi19035<br>9620,gi229<br>9388,gi229<br>9395,gi307<br>94312,gi53<br>5075,gi688<br>290,gi8976<br>02 | 85,603.70 | 100.00% | 9 | 14 | 25    | 0.20%  | 18.90%                                     | AFEESLS<br>TLK                     | 3.05     | 1,124.58 |
| Control | 6011 | endotheli<br>n-<br>convertin<br>g enzyme                                                                                                                                                                                                                                                       | gi1092971,<br>gi1248291<br>88,gi19035<br>9620,gi229<br>9388,gi229<br>9395,gi307<br>94312,gi53<br>5075,gi688<br>290,gi8976<br>02 | 85,603.70 | 100.00% | 9 | 14 | 25    | 0.20%  | 18.90%                                     | EKADAI<br>YNMIGY<br>PNFIMDP<br>K   | 3.51     | 2,346.11 |
| Control | 6011 | endotheli<br>n-<br>convertin<br>g enzyme                                                                                                                                                                                                                                                       | gi1092971,<br>gi1248291<br>88,gi19035<br>9620,gi229<br>9388,gi229<br>9395,gi307<br>94312,gi53<br>5075,gi688<br>290,gi8976<br>02 | 85,603.70 | 100.00% | 9 | 14 | 25    | 0.20%  | 18.90%                                     | ELDKVF<br>NDYTAV<br>PDLYFE<br>NAMR | 4.44     | 2,666.24 |
| Control | 6011 | endotheli<br>n-<br>convertin<br>g enzyme                                                                                                                                                                                                                                                       | gi1092971,<br>gi1248291<br>88,gi19035<br>9620,gi229<br>9388,gi229<br>9395,gi307<br>94312,gi53<br>5075,gi688<br>290,gi8976<br>02 | 85,603.70 | 100.00% | 9 | 14 | 25    | 0.20%  | 18.90%                                     | HTLGENI<br>ADNGGL<br>K             | 4.02     | 1,438.73 |

|         |      |                                         |                                                                                                     |           |         |   |    |    |       |        |                                                   |          |
|---------|------|-----------------------------------------|-----------------------------------------------------------------------------------------------------|-----------|---------|---|----|----|-------|--------|---------------------------------------------------|----------|
| Control | 6011 | endothelin-convertinogen enzyme         | gi 1092971, gi 1248291, gi 19035, gi 9620, gi 9388, gi 9395, gi 94312, gi 5075, gi 290, gi 897602   | 85,603.70 | 100.00% | 9 | 14 | 25 | 0.20% | 18.90% | NEIVFPA 5.05<br>GILQAPF<br>YTR                    | 1,936.03 |
| Control | 6011 | endothelin-convertinogen enzyme         | gi 1092971, gi 1248291, gi 19035, gi 9620, gi 9388, gi 9395, gi 94312, gi 5075, gi 290, gi 897602   | 85,603.70 | 100.00% | 9 | 14 | 25 | 0.20% | 18.90% | SSPNAL 2.61<br>NFGGIG<br>VVVGHE<br>LTHAFD<br>DQGR | 2,894.42 |
| Control | 6011 | endothelin-convertinogen enzyme         | gi 1092971, gi 1248291, gi 19035, gi 9620, gi 9388, gi 9395, gi 94312, gi 5075, gi 290, gi 897602   | 85,603.70 | 100.00% | 9 | 14 | 25 | 0.20% | 18.90% | TPESSHE 4.95<br>GLITDPH<br>SPSR                   | 1,946.92 |
| Control | 6011 | endothelin-convertinogen enzyme         | gi 1092971, gi 1248291, gi 19035, gi 9620, gi 9388, gi 9395, gi 94312, gi 5075, gi 290, gi 897602   | 85,603.70 | 100.00% | 9 | 14 | 25 | 0.20% | 18.90% | VFNDYT 3.05<br>AVPDLY<br>FENAMR                   | 2,181.00 |
| Control | 6011 | endothelin-convertinogen enzyme         | gi 1092971, gi 1248291, gi 19035, gi 9620, gi 9388, gi 9395, gi 94312, gi 5075, gi 290, gi 897602   | 85,603.70 | 100.00% | 9 | 14 | 25 | 0.20% | 18.90% | VLTGYL 3.37<br>NYMVQL<br>GK                       | 1,614.86 |
| Control | 6011 | RecName : Full=60S ribosomal protein L5 | gi 1088620, gi 56, gi 11990, gi 0687, gi 119, gi 905361, gi 6, gi 1552973, gi 75775327, gi 78369655 | 34,327.50 | 99.80%  | 2 | 3  | 3  | 0.02% | 8.75%  | GAVDGG 4.08<br>LSIPHST<br>K                       | 1,338.70 |
| Control | 6011 | RecName : Full=60S ribosomal protein L5 | gi 1088620, gi 56, gi 11990, gi 0687, gi 119, gi 905361, gi 6, gi 1552973, gi 75775327, gi 78369655 | 34,327.50 | 99.80%  | 2 | 3  | 3  | 0.02% | 8.75%  | YLIEEDE 3.11<br>DAYKK                             | 1,515.72 |

|         |      |                                                        |                                                                                                  |           |         |    |    |     |       |        |                        |      |          |
|---------|------|--------------------------------------------------------|--------------------------------------------------------------------------------------------------|-----------|---------|----|----|-----|-------|--------|------------------------|------|----------|
| Control | 6011 | hydroxycyl-Coenzyme A dehydrogenase                    | gi 114052468,gi 194678883,gi 86821535                                                            | 34,251.40 | 99.80%  | 2  | 2  | 2   | 0.02% | 7.67%  | FAGLHFF NPVPLMK        | 3.23 | 1,633.86 |
| Control | 6011 | hydroxycyl-Coenzyme A dehydrogenase                    | gi 114052468,gi 194678883,gi 86821535                                                            | 34,251.40 | 99.80%  | 2  | 2  | 2   | 0.02% | 7.67%  | TFESLLD FSR            | 2.31 | 1,214.61 |
| Control | 6011 | secretory carrier membrane protein 3 isoform 1         | gi 61553277,gi 71649517,gi 73586519,gi 783639651                                                 | 38,348.80 | 100.00% | 3  | 3  | 3   | 0.02% | 15.00% | AQQEFA AGVFSNPAVR      | 3.76 | 1,691.85 |
| Control | 6011 | secretory carrier membrane protein 3 isoform 1         | gi 61553277,gi 71649517,gi 73586519,gi 783639651                                                 | 38,348.80 | 100.00% | 3  | 3  | 3   | 0.02% | 15.00% | NYGSYS TQASTAAATAEL LK | 4.69 | 2,047.00 |
| Control | 6011 | secretory carrier membrane protein 3 isoform 1         | gi 61553277,gi 71649517,gi 73586519,gi 783639651                                                 | 38,348.80 | 100.00% | 3  | 3  | 3   | 0.02% | 15.00% | TAAANA AAGAAE NAFR     | 2.69 | 1,476.72 |
| Control | 6011 | ANO10 protein                                          | gi 154425799,gi 156120985                                                                        | 76,294.20 | 100.00% | 3  | 3  | 3   | 0.02% | 5.61%  | ETLENQ NLYLVG ASK      | 3.16 | 1,678.86 |
| Control | 6011 | ANO10 protein                                          | gi 154425799,gi 156120985                                                                        | 76,294.20 | 100.00% | 3  | 3  | 3   | 0.02% | 5.61%  | LEFESLE ALK            | 2.26 | 1,178.63 |
| Control | 6011 | ANO10 protein                                          | gi 154425799,gi 156120985                                                                        | 76,294.20 | 100.00% | 3  | 3  | 3   | 0.02% | 5.61%  | LLLGAE AVGLVK          | 3.25 | 1,182.75 |
| Control | 6011 | PRKCD BP protein                                       | gi 133778193,gi 134085797,gi 187611336                                                           | 27,468.60 | 100.00% | 4  | 4  | 5   | 0.04% | 18.80% | GHAAPT PTPVKPP R       | 3.64 | 1,425.80 |
| Control | 6011 | PRKCD BP protein                                       | gi 133778193,gi 134085797,gi 187611336                                                           | 27,468.60 | 100.00% | 4  | 4  | 5   | 0.04% | 18.80% | LATMLE TLR             | 2.46 | 1,063.58 |
| Control | 6011 | PRKCD BP protein                                       | gi 133778193,gi 134085797,gi 187611336                                                           | 27,468.60 | 100.00% | 4  | 4  | 5   | 0.04% | 18.80% | LEANHG LLVAR           | 2.87 | 1,192.68 |
| Control | 6011 | PRKCD BP protein                                       | gi 133778193,gi 134085797,gi 187611336                                                           | 27,468.60 | 100.00% | 4  | 4  | 5   | 0.04% | 18.80% | SHDTTS NTLAQL LAK      | 3.26 | 1,599.83 |
| Control | 6011 | PREDICTED: similar to Histone H4 replacement CG3379-PC | gi 119915709,gi 119915719,gi 7915738,gi 76613952,gi 76616306,gi 76631252,gi 76631262,gi 76631717 | 11,349.70 | 100.00% | 11 | 17 | 108 | 0.84% | 56.30% | DAVTTYT EHAK           | 2.61 | 1,134.54 |

|         |      |                                                                                                                                                 |           |         |    |    |     |       |        |                       |          |
|---------|------|-------------------------------------------------------------------------------------------------------------------------------------------------|-----------|---------|----|----|-----|-------|--------|-----------------------|----------|
| Control | 6011 | PREDIC TED: 09,gi 11991 similar to 5719,gi 119 Histone 915738,gi 7 H4 6613952,gi 76616306,gent i 76631252, CG3379- gi 7663126 PC 2,gi 766317 17 | 11,349.70 | 100.00% | 11 | 17 | 108 | 0.84% | 56.30% | DNIQGIT 4.13 KPAIR    | 1,325.75 |
| Control | 6011 | PREDIC TED: 09,gi 11991 similar to 5719,gi 119 Histone 915738,gi 7 H4 6613952,gi 76616306,gent i 76631252, CG3379- gi 7663126 PC 2,gi 766317 17 | 11,349.70 | 100.00% | 11 | 17 | 108 | 0.84% | 56.30% | ISGLIYE 4.17 ETR      | 1,180.62 |
| Control | 6011 | PREDIC TED: 09,gi 11991 similar to 5719,gi 119 Histone 915738,gi 7 H4 6613952,gi 76616306,gent i 76631252, CG3379- gi 7663126 PC 2,gi 766317 17 | 11,349.70 | 100.00% | 11 | 17 | 108 | 0.84% | 56.30% | KTVTAM 3.94 DVVYAL K  | 1,454.79 |
| Control | 6011 | PREDIC TED: 09,gi 11991 similar to 5719,gi 119 Histone 915738,gi 7 H4 6613952,gi 76616306,gent i 76631252, CG3379- gi 7663126 PC 2,gi 766317 17 | 11,349.70 | 100.00% | 11 | 17 | 108 | 0.84% | 56.30% | KTVTAM 4.98 DVVYAL KR | 1,610.89 |
| Control | 6011 | PREDIC TED: 09,gi 11991 similar to 5719,gi 119 Histone 915738,gi 7 H4 6613952,gi 76616306,gent i 76631252, CG3379- gi 7663126 PC 2,gi 766317 17 | 11,349.70 | 100.00% | 11 | 17 | 108 | 0.84% | 56.30% | RISGLIY 2.54 EETR     | 1,336.72 |
| Control | 6011 | PREDIC TED: 09,gi 11991 similar to 5719,gi 119 Histone 915738,gi 7 H4 6613952,gi 76616306,gent i 76631252, CG3379- gi 7663126 PC 2,gi 766317 17 | 11,349.70 | 100.00% | 11 | 17 | 108 | 0.84% | 56.30% | TVTAMD 3.83 VVYALK    | 1,326.70 |
| Control | 6011 | PREDIC TED: 09,gi 11991 similar to 5719,gi 119 Histone 915738,gi 7 H4 6613952,gi 76616306,gent i 76631252, CG3379- gi 7663126 PC 2,gi 766317 17 | 11,349.70 | 100.00% | 11 | 17 | 108 | 0.84% | 56.30% | TVTAMD 3.5 VVYALK R   | 1,482.80 |



|         |      |                                                     |            |           |         |    |    |    |       |        |                                               |      |          |
|---------|------|-----------------------------------------------------|------------|-----------|---------|----|----|----|-------|--------|-----------------------------------------------|------|----------|
| Control | 6011 | inner<br>membran<br>e protein,<br>mitochon<br>drial | gi 1529412 | 83,035.60 | 100.00% | 20 | 24 | 42 | 0.33% | 37.50% | KVEEVR<br>DAMENE<br>MR                        | 2.71 | 1,751.81 |
| Control | 6011 | inner<br>membran<br>e protein,<br>mitochon<br>drial | gi 1529412 | 83,035.60 | 100.00% | 20 | 24 | 42 | 0.33% | 37.50% | LAEQEL<br>QFR                                 | 3.03 | 1,133.60 |
| Control | 6011 | inner<br>membran<br>e protein,<br>mitochon<br>drial | gi 1529412 | 83,035.60 | 100.00% | 20 | 24 | 42 | 0.33% | 37.50% | LAQQEK<br>QEQVKI<br>ESLAK                     | 2.3  | 1,970.09 |
| Control | 6011 | inner<br>membran<br>e protein,<br>mitochon<br>drial | gi 1529412 | 83,035.60 | 100.00% | 20 | 24 | 42 | 0.33% | 37.50% | LSADDL<br>NALIAH<br>AHR                       | 2.84 | 1,616.85 |
| Control | 6011 | inner<br>membran<br>e protein,<br>mitochon<br>drial | gi 1529412 | 83,035.60 | 100.00% | 20 | 24 | 42 | 0.33% | 37.50% | LSQEQV<br>DNFTLDI<br>NTAYAR                   | 4.01 | 2,198.07 |
| Control | 6011 | inner<br>membran<br>e protein,<br>mitochon<br>drial | gi 1529412 | 83,035.60 | 100.00% | 20 | 24 | 42 | 0.33% | 37.50% | MKTASA<br>DLPTVPL<br>GSAVEAI<br>R             | 3.73 | 2,143.14 |
| Control | 6011 | inner<br>membran<br>e protein,<br>mitochon<br>drial | gi 1529412 | 83,035.60 | 100.00% | 20 | 24 | 42 | 0.33% | 37.50% | QIVEILT<br>AYASAV<br>GIGTTQ<br>VQQQEG<br>LGR  | 3.93 | 2,930.56 |
| Control | 6011 | inner<br>membran<br>e protein,<br>mitochon<br>drial | gi 1529412 | 83,035.60 | 100.00% | 20 | 24 | 42 | 0.33% | 37.50% | KKGDTS<br>ASTTAG<br>DTLSVP<br>APVVQH<br>EELIK | 3.06 | 2,979.53 |
| Control | 6011 | inner<br>membran<br>e protein,<br>mitochon<br>drial | gi 1529412 | 83,035.60 | 100.00% | 20 | 24 | 42 | 0.33% | 37.50% | SEIQAEQ<br>DRKVEE<br>VR                       | 3.7  | 1,815.92 |
| Control | 6011 | inner<br>membran<br>e protein,<br>mitochon<br>drial | gi 1529412 | 83,035.60 | 100.00% | 20 | 24 | 42 | 0.33% | 37.50% | SVIENAK<br>KEEVAG<br>AK                       | 5.61 | 1,572.86 |
| Control | 6011 | inner<br>membran<br>e protein,<br>mitochon<br>drial | gi 1529412 | 83,035.60 | 100.00% | 20 | 24 | 42 | 0.33% | 37.50% | TASADL<br>PTVPLGS<br>AVEAIR                   | 4.35 | 1,868.01 |
| Control | 6011 | inner<br>membran<br>e protein,<br>mitochon<br>drial | gi 1529412 | 83,035.60 | 100.00% | 20 | 24 | 42 | 0.33% | 37.50% | TDHPET<br>GEGKPK<br>PATSEEA<br>SSTSVR         | 4.31 | 2,598.23 |
| Control | 6011 | inner<br>membran<br>e protein,<br>mitochon<br>drial | gi 1529412 | 83,035.60 | 100.00% | 20 | 24 | 42 | 0.33% | 37.50% | TIPYSDK<br>LFEMVL<br>GSPPYT<br>VPLPK          | 2.96 | 2,708.43 |
| Control | 6011 | inner<br>membran<br>e protein,<br>mitochon<br>drial | gi 1529412 | 83,035.60 | 100.00% | 20 | 24 | 42 | 0.33% | 37.50% | VQEQL<br>KYEFEQ<br>DLSEK                      | 4.51 | 2,142.02 |

|         |      |                                                      |                                                             |           |         |    |    |    |       |        |                              |      |          |
|---------|------|------------------------------------------------------|-------------------------------------------------------------|-----------|---------|----|----|----|-------|--------|------------------------------|------|----------|
| Control | 6011 | inner membrane protein, mitochondrial                | gi 152941206                                                | 83,035.60 | 100.00% | 20 | 24 | 42 | 0.33% | 37.50% | VQEQL KYEFEQ DLSEKL AEQLQ FR | 4.31 | 3,256.60 |
| Control | 6011 | inner membrane protein, mitochondrial                | gi 152941206                                                | 83,035.60 | 100.00% | 20 | 24 | 42 | 0.33% | 37.50% | VVSQYH ELVVQAR               | 4.38 | 1,527.83 |
| Control | 6011 | SCARB2 protein                                       | gi 151556135,gi 156120953                                   | 53,968.70 | 100.00% | 2  | 2  | 2  | 0.02% | 6.49%  | GQGSTD EGTADE RAPLIR         | 2.16 | 1,872.90 |
| Control | 6011 | SCARB2 protein                                       | gi 151556135,gi 156120953                                   | 53,968.70 | 100.00% | 2  | 2  | 2  | 0.02% | 6.49%  | HDVSPY FGLFYG K              | 3.55 | 1,529.74 |
| Control | 6011 | ATAD1 protein                                        | gi 154426126,gi 76671592                                    | 41,750.40 | 99.80%  | 2  | 4  | 6  | 0.05% | 11.40% | EYVNST SEESHDEDEIRPV QQDLHR  | 3.64 | 3,140.42 |
| Control | 6011 | ATAD1 protein                                        | gi 154426126,gi 76671592                                    | 41,750.40 | 99.80%  | 2  | 4  | 6  | 0.05% | 11.40% | LQPSIFI DEIDSFLR             | 4.31 | 1,906.03 |
| Control | 6011 | dolichylphosphate beta-glucosyltransferase isoform 2 | gi 114052030,gi 215276972,gi 86826341                       | 36,996.60 | 99.80%  | 2  | 2  | 2  | 0.02% | 7.72%  | EALPSIQ DSPTK                | 2.3  | 1,285.66 |
| Control | 6011 | dolichylphosphate beta-glucosyltransferase isoform 2 | gi 114052030,gi 215276972,gi 86826341                       | 36,996.60 | 99.80%  | 2  | 2  | 2  | 0.02% | 7.72%  | QLSVVV PSYNEEK               | 2.46 | 1,491.77 |
| Control | 6011 | Mitochondrial carrier homolog 2 (C. elegans)         | gi 151554706,gi 28603744,gi 59858227,gi 67461083,gi 7959093 | 33,276.60 | 100.00% | 7  | 8  | 12 | 0.09% | 27.70% | EEGILGF FAGLIPR              | 2.91 | 1,518.83 |
| Control | 6011 | Mitochondrial carrier homolog 2 (C. elegans)         | gi 151554706,gi 28603744,gi 59858227,gi 67461083,gi 7959093 | 33,276.60 | 100.00% | 7  | 8  | 12 | 0.09% | 27.70% | GLFTGL TPR                   | 2.45 | 961.5467 |
| Control | 6011 | Mitochondrial carrier homolog 2 (C. elegans)         | gi 151554706,gi 28603744,gi 59858227,gi 67461083,gi 7959093 | 33,276.60 | 100.00% | 7  | 8  | 12 | 0.09% | 27.70% | GNSLFFR                      | 2.49 | 840.4362 |
| Control | 6011 | Mitochondrial carrier homolog 2 (C. elegans)         | gi 151554706,gi 28603744,gi 59858227,gi 67461083,gi 7959093 | 33,276.60 | 100.00% | 7  | 8  | 12 | 0.09% | 27.70% | QVCQLP GLFCYA QHIASID GK     | 3.07 | 2,291.13 |
| Control | 6011 | Mitochondrial carrier homolog 2 (C. elegans)         | gi 151554706,gi 28603744,gi 59858227,gi 67461083,gi 7959093 | 33,276.60 | 100.00% | 7  | 8  | 12 | 0.09% | 27.70% | QVCQLP GLFCYA QHIASID GKR    | 2.36 | 2,447.23 |

|         |      |                                                         |                                                             |           |         |    |    |     |       |        |                                     |      |          |
|---------|------|---------------------------------------------------------|-------------------------------------------------------------|-----------|---------|----|----|-----|-------|--------|-------------------------------------|------|----------|
| Control | 6011 | Mitochondrial carrier homolog 2 (C. elegans)            | gi 151554706,gi 28603744,gi 59858227,gi 67461083,gi 7959093 | 33,276.60 | 100.00% | 7  | 8  | 12  | 0.09% | 27.70% | SAATLIT<br>HPFHVIT<br>LR            | 4.54 | 1,777.01 |
| Control | 6011 | Mitochondrial carrier homolog 2 (C. elegans)            | gi 151554706,gi 28603744,gi 59858227,gi 67461083,gi 7959093 | 33,276.60 | 100.00% | 7  | 8  | 12  | 0.09% | 27.70% | VLIQVG<br>YEPLAPT<br>VGR            | 4.5  | 1,711.97 |
| Control | 6011 | PREDICTED: similar to cytoskeleton-associated protein 4 | gi 119892686                                                | 64,511.50 | 100.00% | 29 | 46 | 108 | 0.84% | 45.70% | AAALRP<br>EEDGAF<br>RPSEAFE<br>TLQK | 3.32 | 2,533.27 |
| Control | 6011 | PREDICTED: similar to cytoskeleton-associated protein 4 | gi 119892686                                                | 64,511.50 | 100.00% | 29 | 46 | 108 | 0.84% | 45.70% | AEESAA<br>HLPEEIR                   | 3.13 | 1,451.71 |
| Control | 6011 | PREDICTED: similar to cytoskeleton-associated protein 4 | gi 119892686                                                | 64,511.50 | 100.00% | 29 | 46 | 108 | 0.84% | 45.70% | AEESAA<br>HLPEEIR<br>R              | 2.16 | 1,607.81 |
| Control | 6011 | PREDICTED: similar to cytoskeleton-associated protein 4 | gi 119892686                                                | 64,511.50 | 100.00% | 29 | 46 | 108 | 0.84% | 45.70% | ASVGQV<br>ESDLK                     | 3.32 | 1,132.58 |
| Control | 6011 | PREDICTED: similar to cytoskeleton-associated protein 4 | gi 119892686                                                | 64,511.50 | 100.00% | 29 | 46 | 108 | 0.84% | 45.70% | DFTSLEN<br>TVEER                    | 3.41 | 1,439.66 |
| Control | 6011 | PREDICTED: similar to cytoskeleton-associated protein 4 | gi 119892686                                                | 64,511.50 | 100.00% | 29 | 46 | 108 | 0.84% | 45.70% | DLSDGIH<br>VVK                      | 1.73 | 1,082.58 |
| Control | 6011 | PREDICTED: similar to cytoskeleton-associated protein 4 | gi 119892686                                                | 64,511.50 | 100.00% | 29 | 46 | 108 | 0.84% | 45.70% | EAADSE<br>HHTLQA<br>LTEK            | 3.61 | 1,779.85 |



|         |      |                                                                |            |           |         |    |    |     |       |        |                      |      |          |
|---------|------|----------------------------------------------------------------|------------|-----------|---------|----|----|-----|-------|--------|----------------------|------|----------|
| Control | 6011 | PREDIC TED: 86<br>similar to cytoskeleton-associated protein 4 | gi 1198926 | 64,511.50 | 100.00% | 29 | 46 | 108 | 0.84% | 45.70% | EELGQG LQGVEQ K      | 3.59 | 1,414.72 |
| Control | 6011 | PREDIC TED: 86<br>similar to cytoskeleton-associated protein 4 | gi 1198926 | 64,511.50 | 100.00% | 29 | 46 | 108 | 0.84% | 45.70% | ELVSLK QEQR          | 3.66 | 1,357.74 |
| Control | 6011 | PREDIC TED: 86<br>similar to cytoskeleton-associated protein 4 | gi 1198926 | 64,511.50 | 100.00% | 29 | 46 | 108 | 0.84% | 45.70% | ERDFTSL ENTVEE R     | 4.34 | 1,724.81 |
| Control | 6011 | PREDIC TED: 86<br>similar to cytoskeleton-associated protein 4 | gi 1198926 | 64,511.50 | 100.00% | 29 | 46 | 108 | 0.84% | 45.70% | EVVKEI QTSVK         | 3.15 | 1,259.72 |
| Control | 6011 | PREDIC TED: 86<br>similar to cytoskeleton-associated protein 4 | gi 1198926 | 64,511.50 | 100.00% | 29 | 46 | 108 | 0.84% | 45.70% | FKEAAD SEHHTL QALTEK | 4.81 | 2,055.01 |
| Control | 6011 | PREDIC TED: 86<br>similar to cytoskeleton-associated protein 4 | gi 1198926 | 64,511.50 | 100.00% | 29 | 46 | 108 | 0.84% | 45.70% | GLGEAQ LSLAGD VDELK  | 4.88 | 1,714.89 |
| Control | 6011 | PREDIC TED: 86<br>similar to cytoskeleton-associated protein 4 | gi 1198926 | 64,511.50 | 100.00% | 29 | 46 | 108 | 0.84% | 45.70% | GLGEAQ LSLAGD VDELKR | 4.46 | 1,870.99 |
| Control | 6011 | PREDIC TED: 86<br>similar to cytoskeleton-associated protein 4 | gi 1198926 | 64,511.50 | 100.00% | 29 | 46 | 108 | 0.84% | 45.70% | GLLEDL RNDLDR        | 2.18 | 1,428.74 |

|         |      |                                                                |            |           |         |    |    |     |       |        |                                |          |
|---------|------|----------------------------------------------------------------|------------|-----------|---------|----|----|-----|-------|--------|--------------------------------|----------|
| Control | 6011 | PREDIC TED: 86<br>similar to cytoskeleton-associated protein 4 | gi 1198926 | 64,511.50 | 100.00% | 29 | 46 | 108 | 0.84% | 45.70% | IETNENN 3.29<br>LESAK          | 1,361.65 |
| Control | 6011 | PREDIC TED: 86<br>similar to cytoskeleton-associated protein 4 | gi 1198926 | 64,511.50 | 100.00% | 29 | 46 | 108 | 0.84% | 45.70% | ILRAEES 2.74<br>AAHLPE<br>EIR  | 1,833.98 |
| Control | 6011 | PREDIC TED: 86<br>similar to cytoskeleton-associated protein 4 | gi 1198926 | 64,511.50 | 100.00% | 29 | 46 | 108 | 0.84% | 45.70% | LEEELG 3.1<br>QLK              | 1,058.57 |
| Control | 6011 | PREDIC TED: 86<br>similar to cytoskeleton-associated protein 4 | gi 1198926 | 64,511.50 | 100.00% | 29 | 46 | 108 | 0.84% | 45.70% | LQNEILK 5.68<br>DLSDGIH<br>VVK | 1,921.08 |
| Control | 6011 | PREDIC TED: 86<br>similar to cytoskeleton-associated protein 4 | gi 1198926 | 64,511.50 | 100.00% | 29 | 46 | 108 | 0.84% | 45.70% | LQSVED 3.74<br>GVQAAR          | 1,272.65 |
| Control | 6011 | PREDIC TED: 86<br>similar to cytoskeleton-associated protein 4 | gi 1198926 | 64,511.50 | 100.00% | 29 | 46 | 108 | 0.84% | 45.70% | QREELG 3.26<br>QGLQGV<br>EQK   | 1,698.88 |
| Control | 6011 | PREDIC TED: 86<br>similar to cytoskeleton-associated protein 4 | gi 1198926 | 64,511.50 | 100.00% | 29 | 46 | 108 | 0.84% | 45.70% | RLEEEL 3.85<br>GLK             | 1,214.67 |
| Control | 6011 | PREDIC TED: 86<br>similar to cytoskeleton-associated protein 4 | gi 1198926 | 64,511.50 | 100.00% | 29 | 46 | 108 | 0.84% | 45.70% | SINDNIAI 4.72<br>FTDVQK        | 1,577.82 |

|         |      |                                                           |                                          |           |         |    |    |     |       |        |                                                 |          |
|---------|------|-----------------------------------------------------------|------------------------------------------|-----------|---------|----|----|-----|-------|--------|-------------------------------------------------|----------|
| Control | 6011 | PREDIC TED: 86<br>similar to cytoskeletal protein 4       | gi 1198926                               | 64,511.50 | 100.00% | 29 | 46 | 108 | 0.84% | 45.70% | SINDNIAI 4.03<br>FTDVQK<br>R                    | 1,733.92 |
| Control | 6011 | PREDIC TED: 86<br>similar to cytoskeletal protein 4       | gi 1198926                               | 64,511.50 | 100.00% | 29 | 46 | 108 | 0.84% | 45.70% | STIQTME 3.06<br>SDVYTE<br>VK                    | 1,746.81 |
| Control | 6011 | PREDIC TED: 86<br>similar to cytoskeletal protein 4       | gi 1198926                               | 64,511.50 | 100.00% | 29 | 46 | 108 | 0.84% | 45.70% | STIQTME 3.41<br>SDVYTE<br>VKELVS<br>LKQEQQ<br>R | 3,069.54 |
| Control | 6011 | PREDIC TED: 86<br>similar to cytoskeletal protein 4       | gi 1198926                               | 64,511.50 | 100.00% | 29 | 46 | 108 | 0.84% | 45.70% | TAVDSL 4.41<br>VAYSVK                           | 1,252.68 |
| Control | 6011 | PREDIC TED: 86<br>similar to cytoskeletal protein 4       | gi 1198926                               | 64,511.50 | 100.00% | 29 | 46 | 108 | 0.84% | 45.70% | VQEQVH 4.03<br>TLLGR                            | 1,279.71 |
| Control | 6011 | PREDIC TED: 86<br>similar to cytoskeletal protein 4       | gi 1198926                               | 64,511.50 | 100.00% | 29 | 46 | 108 | 0.84% | 45.70% | VQSLQA 4.4<br>TFGTFES<br>LVR                    | 1,782.94 |
| Control | 6011 | TMED7 protein 46,gi 157428116                             | gi 1340252                               | 25,318.00 | 100.00% | 4  | 5  | 9   | 0.07% | 18.70% | KQYDSY 3.46<br>TFTASK                           | 1,438.68 |
| Control | 6011 | TMED7 protein 46,gi 157428116                             | gi 1340252                               | 25,318.00 | 100.00% | 4  | 5  | 9   | 0.07% | 18.70% | QYDSYT 2.18<br>FTASK                            | 1,310.59 |
| Control | 6011 | TMED7 protein 46,gi 157428116                             | gi 1340252                               | 25,318.00 | 100.00% | 4  | 5  | 9   | 0.07% | 18.70% | SVIDYQT 3.08<br>HFR                             | 1,265.63 |
| Control | 6011 | TMED7 protein 46,gi 157428116                             | gi 1340252                               | 25,318.00 | 100.00% | 4  | 5  | 9   | 0.07% | 18.70% | TVYFDF 3.53<br>QVGEDP<br>PLFPSEN<br>R           | 2,357.11 |
| Control | 6011 | similar to peptidylprolyl isomerase 300 A (cyclophilin A) | gi 2818977<br>1,gi 587604<br>24,gi 75948 | 17,851.80 | 100.00% | 3  | 4  | 4   | 0.03% | 24.40% | SIYGKFK 3.33<br>DDENFIL<br>K                    | 1,817.90 |

|         |      |                                                                           |                                                                                                |           |         |   |    |    |       |        |                                           |          |
|---------|------|---------------------------------------------------------------------------|------------------------------------------------------------------------------------------------|-----------|---------|---|----|----|-------|--------|-------------------------------------------|----------|
| Control | 6011 | similar to<br>peptidylp<br>rolyl<br>isomerase<br>A<br>(cyclophi<br>lin A) | gi 2818977<br>1,gi 587604<br>24,gi 75948<br>300                                                | 17,851.80 | 100.00% | 3 | 4  | 4  | 0.03% | 24.40% | VKEGMN 2.89<br>IVEAME<br>R                | 1,521.74 |
| Control | 6011 | similar to<br>peptidylp<br>rolyl<br>isomerase<br>A<br>(cyclophi<br>lin A) | gi 2818977<br>1,gi 587604<br>24,gi 75948<br>300                                                | 17,851.80 | 100.00% | 3 | 4  | 4  | 0.03% | 24.40% | VSFELFA 3.07<br>DKVPK                     | 1,379.76 |
| Control | 6011 | Clusterin                                                                 | gi 1099399<br>36,gi 11653<br>0,gi 146231<br>734,gi 1515<br>55910,gi 16<br>3115,gi 278<br>06907 | 51,096.70 | 99.80%  | 2 | 2  | 2  | 0.02% | 6.38%  | LYDQLL 3.82<br>QSYQQK                     | 1,526.79 |
| Control | 6011 | Clusterin                                                                 | gi 1099399<br>36,gi 11653<br>0,gi 146231<br>734,gi 1515<br>55910,gi 16<br>3115,gi 278<br>06907 | 51,096.70 | 99.80%  | 2 | 2  | 2  | 0.02% | 6.38%  | RPQDTQ 3.57<br>YYSFSS<br>FPR              | 1,975.93 |
| Control | 6011 | Prohibitin                                                                | gi 7435452<br>7,gi 777360<br>91,gi 88909<br>243                                                | 29,786.60 | 100.00% | 9 | 13 | 35 | 0.27% | 47.80% | AAELIAN 4.23<br>SLATAG<br>DGLIELR         | 1,998.09 |
| Control | 6011 | Prohibitin                                                                | gi 7435452<br>7,gi 777360<br>91,gi 88909<br>243                                                | 29,786.60 | 100.00% | 9 | 13 | 35 | 0.27% | 47.80% | DLQNVN 3.82<br>ITLR                       | 1,185.66 |
| Control | 6011 | Prohibitin                                                                | gi 7435452<br>7,gi 777360<br>91,gi 88909<br>243                                                | 29,786.60 | 100.00% | 9 | 13 | 35 | 0.27% | 47.80% | FDAGELI 3.72<br>TQR                       | 1,149.59 |
| Control | 6011 | Prohibitin                                                                | gi 7435452<br>7,gi 777360<br>91,gi 88909<br>243                                                | 29,786.60 | 100.00% | 9 | 13 | 35 | 0.27% | 47.80% | FGLALA 3.79<br>VAGGVV<br>NSALYN<br>VDAGHR | 2,371.25 |
| Control | 6011 | Prohibitin                                                                | gi 7435452<br>7,gi 777360<br>91,gi 88909<br>243                                                | 29,786.60 | 100.00% | 9 | 13 | 35 | 0.27% | 47.80% | IFTSIGE 3.25<br>DYDER                     | 1,444.66 |
| Control | 6011 | Prohibitin                                                                | gi 7435452<br>7,gi 777360<br>91,gi 88909<br>243                                                | 29,786.60 | 100.00% | 9 | 13 | 35 | 0.27% | 47.80% | ILFRPVA 3.11<br>SQLPR                     | 1,396.84 |
| Control | 6011 | Prohibitin                                                                | gi 7435452<br>7,gi 777360<br>91,gi 88909<br>243                                                | 29,786.60 | 100.00% | 9 | 13 | 35 | 0.27% | 47.80% | KLEAAE 4.33<br>DIAYQLS<br>R               | 1,606.84 |
| Control | 6011 | Prohibitin                                                                | gi 7435452<br>7,gi 777360<br>91,gi 88909<br>243                                                | 29,786.60 | 100.00% | 9 | 13 | 35 | 0.27% | 47.80% | NITYLPA 3.9<br>GQSVLL<br>QLPQ             | 1,855.03 |
| Control | 6011 | Prohibitin                                                                | gi 7435452<br>7,gi 777360<br>91,gi 88909<br>243                                                | 29,786.60 | 100.00% | 9 | 13 | 35 | 0.27% | 47.80% | VLPSITT 2.71<br>EILK                      | 1,213.74 |

|         |      |                                                   |                                                                                                                                                                                           |           |         |   |   |   |       |        |                                       |          |
|---------|------|---------------------------------------------------|-------------------------------------------------------------------------------------------------------------------------------------------------------------------------------------------|-----------|---------|---|---|---|-------|--------|---------------------------------------|----------|
| Control | 6011 | Stromal cell derived factor 4                     | gi 7358691<br>9,gi 783692<br>98                                                                                                                                                           | 41,088.60 | 99.80%  | 2 | 2 | 2 | 0.02% | 9.58%  | QMIAIAD 2.91<br>ENQNH<br>LEPEEVL<br>K | 2,500.20 |
| Control | 6011 | Stromal cell derived factor 4                     | gi 7358691<br>9,gi 783692<br>98                                                                                                                                                           | 41,088.60 | 99.80%  | 2 | 2 | 2 | 0.02% | 9.58%  | TAEHFQ 4.02<br>EAVAES<br>R            | 1,474.69 |
| Control | 6011 | ras-related C3 botulinum toxin substrate 1        | gi 2780644<br>3,gi 517027<br>85,gi 60070<br>14,gi 73587<br>375                                                                                                                            | 21,432.60 | 100.00% | 2 | 3 | 6 | 0.05% | 7.81%  | KLTPITY 4.31<br>PQGLAM<br>AK          | 1,647.91 |
| Control | 6011 | ras-related C3 botulinum toxin substrate 1        | gi 2780644<br>3,gi 517027<br>85,gi 60070<br>14,gi 73587<br>375                                                                                                                            | 21,432.60 | 100.00% | 2 | 3 | 6 | 0.05% | 7.81%  | LTPITYP 3.32<br>QGLAMA<br>K           | 1,519.82 |
| Control | 6011 | Interferon induced transmembrane protein 1 (9-27) | gi 1123624<br>18,gi 11815<br>1192,gi 118<br>151350,gi 1<br>18151354,gi <br>11991951<br>3,gi 142795<br>76,gi 14279<br>578,gi 1487<br>44152,gi 32<br>480628,gi 7<br>3586549,gi <br>73587371 | 13,629.20 | 99.80%  | 2 | 3 | 4 | 0.03% | 13.70% | KMVGDI 3.3<br>TGAQSY<br>ASTAK         | 1,743.86 |
| Control | 6011 | Interferon induced transmembrane protein 1 (9-27) | gi 1123624<br>18,gi 11815<br>1192,gi 118<br>151350,gi 1<br>18151354,gi <br>11991951<br>3,gi 142795<br>76,gi 14279<br>578,gi 1487<br>44152,gi 32<br>480628,gi 7<br>3586549,gi <br>73587371 | 13,629.20 | 99.80%  | 2 | 3 | 4 | 0.03% | 13.70% | MVGDIT 4.88<br>GAQSYA<br>STAK         | 1,615.76 |
| Control | 6011 | RecName : Full=Histone H1.1; AltName: Full=CT L-1 | gi 121903                                                                                                                                                                                 | 10,347.40 | 100.00% | 5 | 7 | 7 | 0.05% | 42.30% | ALAAAG 3.46<br>YDVEK                  | 1,107.57 |
| Control | 6011 | RecName : Full=Histone H1.1; AltName: Full=CT L-1 | gi 121903                                                                                                                                                                                 | 10,347.40 | 100.00% | 5 | 7 | 7 | 0.05% | 42.30% | ALAAAG 4.85<br>YDVEKN<br>NSR          | 1,578.79 |

|         |      |                                                                                                                               |           |         |   |   |   |       |        |                                  |      |          |
|---------|------|-------------------------------------------------------------------------------------------------------------------------------|-----------|---------|---|---|---|-------|--------|----------------------------------|------|----------|
| Control | 6011 | RecName gi 121903<br>:<br>Full=Hist<br>one H1.1;<br>AltName:<br>Full=CT<br>L-1                                                | 10,347.40 | 100.00% | 5 | 7 | 7 | 0.05% | 42.30% | ASGPPV<br>SELITK                 | 2.35 | 1,198.67 |
| Control | 6011 | RecName gi 121903<br>:<br>Full=Hist<br>one H1.1;<br>AltName:<br>Full=CT<br>L-1                                                | 10,347.40 | 100.00% | 5 | 7 | 7 | 0.05% | 42.30% | KASGPP<br>VSELITK                | 3.97 | 1,326.76 |
| Control | 6011 | RecName gi 121903<br>:<br>Full=Hist<br>one H1.1;<br>AltName:<br>Full=CT<br>L-1                                                | 10,347.40 | 100.00% | 5 | 7 | 7 | 0.05% | 42.30% | SETAPA<br>APAAAP<br>PAEK         | 3.23 | 1,478.75 |
| Control | 6011 | GNAS<br>complex<br>locus<br>gi 1139122<br>07.gi 74268<br>384                                                                  | 45,691.40 | 100.00% | 4 | 5 | 8 | 0.06% | 17.50% | ILHVNGF<br>NGEGGE<br>EDPQAA<br>R | 6.17 | 2,110.00 |
| Control | 6011 | GNAS<br>complex<br>locus<br>gi 1139122<br>07.gi 74268<br>384                                                                  | 45,691.40 | 100.00% | 4 | 5 | 8 | 0.06% | 17.50% | LLLLGA<br>GESGK                  | 3.47 | 1,057.63 |
| Control | 6011 | GNAS<br>complex<br>locus<br>gi 1139122<br>07.gi 74268<br>384                                                                  | 45,691.40 | 100.00% | 4 | 5 | 8 | 0.06% | 17.50% | SKIEDYF<br>PEFAR                 | 3.54 | 1,501.73 |
| Control | 6011 | GNAS<br>complex<br>locus<br>gi 1139122<br>07.gi 74268<br>384                                                                  | 45,691.40 | 100.00% | 4 | 5 | 8 | 0.06% | 17.50% | VLTS GIF<br>ETK                  | 2.24 | 1,094.61 |
| Control | 6011 | GNAS<br>complex<br>locus<br>gi 1139122<br>07.gi 74268<br>384                                                                  | 45,691.40 | 100.00% | 4 | 5 | 8 | 0.06% | 17.50% | YTTPED<br>ATPEPG<br>EDPR         | 3.35 | 1,774.78 |
| Control | 6011 | PREDIC<br>TED:<br>15<br>similar to<br>Transme<br>mbrane 9<br>superfami<br>ly<br>member<br>2<br>precursor<br>(p76),<br>partial | 72,962.00 | 100.00% | 3 | 5 | 5 | 0.04% | 4.40%  | IYYHV V<br>ETGSMG<br>AR          | 4.4  | 1,598.76 |
| Control | 6011 | PREDIC<br>TED:<br>15<br>similar to<br>Transme<br>mbrane 9<br>superfami<br>ly<br>member<br>2<br>precursor<br>(p76),<br>partial | 72,962.00 | 100.00% | 3 | 5 | 5 | 0.04% | 4.40%  | PSEN LG<br>QVLFGE<br>R           | 3.64 | 1,445.74 |

|         |      |                                                                                            |            |            |         |   |   |   |       |        |                                                      |      |          |
|---------|------|--------------------------------------------------------------------------------------------|------------|------------|---------|---|---|---|-------|--------|------------------------------------------------------|------|----------|
| Control | 6011 | PREDIC TED: 15<br>similar to Transmembrane 9 superfamily member 2 precursor (p76), partial | gi 1946719 | 72,962.00  | 100.00% | 3 | 5 | 5 | 0.04% | 4.40%  | RPSENL<br>GQVLF<br>ER                                | 2.81 | 1,601.84 |
| Control | 6011 | interferon stimulated gene 17 83 [Ovis aries]                                              | gi 1208240 | 17,482.10  | 100.00% | 4 | 4 | 4 | 0.03% | 33.10% | EVLQEG<br>VPLVHQ<br>GLK                              | 4.23 | 1,645.93 |
| Control | 6011 | interferon stimulated gene 17 83 [Ovis aries]                                              | gi 1208240 | 17,482.10  | 100.00% | 4 | 4 | 4 | 0.03% | 33.10% | INVPAFQ<br>QR                                        | 2.77 | 1,072.59 |
| Control | 6011 | interferon stimulated gene 17 83 [Ovis aries]                                              | gi 1208240 | 17,482.10  | 100.00% | 4 | 4 | 4 | 0.03% | 33.10% | MLGGEE<br>ILVPLR                                     | 3.08 | 1,342.74 |
| Control | 6011 | interferon stimulated gene 17 83 [Ovis aries]                                              | gi 1208240 | 17,482.10  | 100.00% | 4 | 4 | 4 | 0.03% | 33.10% | SSSYEV<br>QLTQTV<br>AVLK                             | 3.92 | 1,752.94 |
| Control | 6011 | RecName : Full=60S acidic ribosomal protein P0; AltName: Full=L10E                         | gi 1089358 | 34,353.40  | 99.80%  | 2 | 2 | 2 | 0.02% | 13.20% | AFLADP<br>SAFVAA<br>APVAAA<br>PAAAPA<br>ATTAAP<br>AK | 4.23 | 2,849.52 |
| Control | 6011 | RecName : Full=60S acidic ribosomal protein P0; AltName: Full=L10E                         | gi 1089358 | 34,353.40  | 99.80%  | 2 | 2 | 2 | 0.02% | 13.20% | IIQLLDD<br>YPK                                       | 3.23 | 1,217.68 |
| Control | 6011 | PREDIC TED: 32<br>similar to hypoxia up-regulated 1                                        | gi 1199071 | 111,596.90 | 99.80%  | 2 | 2 | 2 | 0.02% | 4.60%  | VAIVKP<br>GVPMEI<br>VLNK                             | 2.78 | 1,723.02 |
| Control | 6011 | PREDIC TED: 32<br>similar to hypoxia up-regulated 1                                        | gi 1199071 | 111,596.90 | 99.80%  | 2 | 2 | 2 | 0.02% | 4.60%  | VPGPVQ<br>QALQSA<br>EMKLDE<br>IEQVILV<br>GGATR       | 3.71 | 3,192.69 |

|         |      |                                                                        |                                                              |           |         |   |   |   |       |        |                                                         |      |          |
|---------|------|------------------------------------------------------------------------|--------------------------------------------------------------|-----------|---------|---|---|---|-------|--------|---------------------------------------------------------|------|----------|
| Control | 6011 | UPF0404 protein C11orf59 homolog                                       | gi 122140364,gi 74267677,gi 77736483                         | 17,713.10 | 99.80%  | 2 | 2 | 2 | 0.02% | 26.70% | LPPLPSL<br>TSQPHQ<br>VLASEP<br>VPFSDL<br>QQVSR          | 4.67 | 3,267.74 |
| Control | 6011 | UPF0404 protein C11orf59 homolog                                       | gi 122140364,gi 74267677,gi 77736483                         | 17,713.10 | 99.80%  | 2 | 2 | 2 | 0.02% | 26.70% | TDEQAL<br>LSSILAK                                       | 3.56 | 1,388.76 |
| Control | 6011 | RPL12 protein                                                          | gi 148744191,gi 42564206,gi 45430019,gi 47117092,gi 74354972 | 17,801.10 | 100.00% | 3 | 3 | 3 | 0.02% | 40.00% | EILGTAQ<br>SVGCVN<br>DGRHPH<br>DIIDDINS<br>GAVECP<br>AS | 3.04 | 3,589.67 |
| Control | 6011 | RPL12 protein                                                          | gi 148744191,gi 42564206,gi 45430019,gi 47117092,gi 74354972 | 17,801.10 | 100.00% | 3 | 3 | 3 | 0.02% | 40.00% | HSGNITF<br>DEIVNIA<br>R                                 | 4.12 | 1,685.86 |
| Control | 6011 | RPL12 protein                                                          | gi 148744191,gi 42564206,gi 45430019,gi 47117092,gi 74354972 | 17,801.10 | 100.00% | 3 | 3 | 3 | 0.02% | 40.00% | QAQIEV<br>VPSASA<br>LIK                                 | 3.3  | 1,666.97 |
| Control | 6011 | Nucleobindin 2                                                         | gi 113912161,gi 115496067                                    | 49,171.70 | 100.00% | 3 | 3 | 3 | 0.02% | 9.16%  | LHDVNS<br>DGFLDE<br>QELEALF<br>TK                       | 3.03 | 2,420.16 |
| Control | 6011 | Nucleobindin 2                                                         | gi 113912161,gi 115496067                                    | 49,171.70 | 100.00% | 3 | 3 | 3 | 0.02% | 9.16%  | LHDVNS<br>DGFLDE<br>QELEALF<br>TKELEK                   | 2.73 | 2,919.43 |
| Control | 6011 | Nucleobindin 2                                                         | gi 113912161,gi 115496067                                    | 49,171.70 | 100.00% | 3 | 3 | 3 | 0.02% | 9.16%  | QVIDVL<br>ETDSHF<br>R                                   | 2.64 | 1,558.79 |
| Control | 6011 | VAMP (vesicle-associated membrane protein)-associated protein A, 33kDa | gi 111304648,gi 115496338,gi 121957506                       | 27,838.90 | 99.80%  | 2 | 4 | 7 | 0.05% | 11.20% | FKGPFT<br>DVVTTN<br>LK                                  | 3.86 | 1,566.85 |
| Control | 6011 | VAMP (vesicle-associated membrane protein)-associated protein A, 33kDa | gi 111304648,gi 115496338,gi 121957506                       | 27,838.90 | 99.80%  | 2 | 4 | 7 | 0.05% | 11.20% | GPFTDV<br>VTTNLK                                        | 3.99 | 1,291.69 |



|         |      |                                                                                                     |                                                    |            |         |    |    |    |       |        |                                                 |          |
|---------|------|-----------------------------------------------------------------------------------------------------|----------------------------------------------------|------------|---------|----|----|----|-------|--------|-------------------------------------------------|----------|
| Control | 6011 | VAMP<br>(vesicle-<br>associate<br>d<br>membran<br>e protein)-<br>associate<br>d protein<br>A, 33kDa | gi 1113046<br>48,gi 11549<br>6338,gi 121<br>957506 | 27,838.90  | 99.80%  | 2  | 4  | 7  | 0.05% | 11.20% | HEQILVL 4.26<br>DPPTDL<br>K                     | 1,617.89 |
| Control | 6011 | RecName<br>:<br>Full=Cate<br>nin alpha-<br>1                                                        | gi 1141492<br>56,gi 75773<br>615,gi 7836           | 100,117.00 | 100.00% | 12 | 12 | 20 | 0.16% | 21.00% | AEVQNL 4.55<br>GGELVV<br>SGVDSA<br>MSLIQA<br>AK | 2,602.34 |
| Control | 6011 | RecName<br>:<br>Full=Cate<br>nin alpha-<br>1                                                        | gi 1141492<br>56,gi 75773<br>615,gi 7836           | 100,117.00 | 100.00% | 12 | 12 | 20 | 0.16% | 21.00% | AHVLAA 3.55<br>SVEQAT<br>ENFLEK                 | 1,957.00 |
| Control | 6011 | RecName<br>:<br>Full=Cate<br>nin alpha-<br>1                                                        | gi 1141492<br>56,gi 75773<br>615,gi 7836           | 100,117.00 | 100.00% | 12 | 12 | 20 | 0.16% | 21.00% | AHVLAA 2.69<br>SVEQAT<br>ENFLEK<br>GDK          | 2,257.15 |
| Control | 6011 | RecName<br>:<br>Full=Cate<br>nin alpha-<br>1                                                        | gi 1141492<br>56,gi 75773<br>615,gi 7836           | 100,117.00 | 100.00% | 12 | 12 | 20 | 0.16% | 21.00% | AIMAQL 3.15<br>PQEQK                            | 1,256.67 |
| Control | 6011 | RecName<br>:<br>Full=Cate<br>nin alpha-<br>1                                                        | gi 1141492<br>56,gi 75773<br>615,gi 7836           | 100,117.00 | 100.00% | 12 | 12 | 20 | 0.16% | 21.00% | HVNPVQ 3.27<br>ALSEFK                           | 1,368.73 |
| Control | 6011 | RecName<br>:<br>Full=Cate<br>nin alpha-<br>1                                                        | gi 1141492<br>56,gi 75773<br>615,gi 7836           | 100,117.00 | 100.00% | 12 | 12 | 20 | 0.16% | 21.00% | IAEQVAS 4.19<br>FQEEK                           | 1,378.68 |
| Control | 6011 | RecName<br>:<br>Full=Cate<br>nin alpha-<br>1                                                        | gi 1141492<br>56,gi 75773<br>615,gi 7836           | 100,117.00 | 100.00% | 12 | 12 | 20 | 0.16% | 21.00% | LLEPLVT 4.41<br>QVTTLV<br>NTNSK                 | 1,970.12 |
| Control | 6011 | RecName<br>:<br>Full=Cate<br>nin alpha-<br>1                                                        | gi 1141492<br>56,gi 75773<br>615,gi 7836           | 100,117.00 | 100.00% | 12 | 12 | 20 | 0.16% | 21.00% | NAGTEQ 2.96<br>DLGIQY<br>K                      | 1,436.70 |
| Control | 6011 | RecName<br>:<br>Full=Cate<br>nin alpha-<br>1                                                        | gi 1141492<br>56,gi 75773<br>615,gi 7836           | 100,117.00 | 100.00% | 12 | 12 | 20 | 0.16% | 21.00% | NLMNAV 3.62<br>VQTVK                            | 1,232.67 |
| Control | 6011 | RecName<br>:<br>Full=Cate<br>nin alpha-<br>1                                                        | gi 1141492<br>56,gi 75773<br>615,gi 7836           | 100,117.00 | 100.00% | 12 | 12 | 20 | 0.16% | 21.00% | TSVQTE 3.42<br>DDQLIA<br>GQSAR                  | 1,818.88 |
| Control | 6011 | RecName<br>:<br>Full=Cate<br>nin alpha-<br>1                                                        | gi 1141492<br>56,gi 75773<br>615,gi 7836           | 100,117.00 | 100.00% | 12 | 12 | 20 | 0.16% | 21.00% | VIHVVTS 3.6<br>EMDNYE<br>PGVYTE<br>K            | 2,310.10 |

|         |      |                                                                                                             |                                                                                |            |         |    |    |    |       |        |                                                    |          |
|---------|------|-------------------------------------------------------------------------------------------------------------|--------------------------------------------------------------------------------|------------|---------|----|----|----|-------|--------|----------------------------------------------------|----------|
| Control | 6011 | RecName<br>:<br>Full=Cate<br>nin alpha-<br>1                                                                | gi 1141492<br>56,gi 75773<br>615,gi 7836<br>9272                               | 100,117.00 | 100.00% | 12 | 12 | 20 | 0.16% | 21.00% | VLTDAV 4.81<br>DDITSID<br>DFLAVS<br>ENHILED<br>VNK | 3,200.58 |
| Control | 6011 | RecName<br>:<br>Full=Tra<br>nsmembr<br>ane and<br>coiled-<br>coil<br>domain-<br>containin<br>g protein<br>1 | gi 1098952<br>13,gi 74354<br>058,gi 7773<br>6477                               | 21,158.30  | 99.80%  | 2  | 3  | 4  | 0.03% | 15.40% | LPFTPLS 4.37<br>YIQGLSH<br>R                       | 1,728.94 |
| Control | 6011 | RecName<br>:<br>Full=Tra<br>nsmembr<br>ane and<br>coiled-<br>coil<br>domain-<br>containin<br>g protein<br>1 | gi 1098952<br>13,gi 74354<br>058,gi 7773<br>6477                               | 21,158.30  | 99.80%  | 2  | 3  | 4  | 0.03% | 15.40% | QAGGFL 3.03<br>GPPPPSG<br>K                        | 1,309.69 |
| Control | 6011 | GOSR2<br>protein                                                                                            | gi 1487438<br>89,gi 14964<br>2953                                              | 24,629.80  | 99.80%  | 2  | 2  | 2  | 0.02% | 18.90% | LETADK 3.04<br>QALHLV<br>ENEIQAS<br>IDQIFSQ<br>LER | 3,338.72 |
| Control | 6011 | GOSR2<br>protein                                                                                            | gi 1487438<br>89,gi 14964<br>2953                                              | 24,629.80  | 99.80%  | 2  | 2  | 2  | 0.02% | 18.90% | YDVQHL 2.74<br>QTALR                               | 1,343.71 |
| Control | 6011 | mitochon<br>drial<br>trifunctio<br>nal<br>protein,<br>beta<br>subunit<br>precursor                          | gi 1462318<br>62,gi 27885<br>005,gi 2832<br>715,gi 6015<br>048,gi 7426<br>8350 | 51,329.00  | 99.80%  | 2  | 2  | 2  | 0.02% | 8.21%  | DTVTQD 2.6<br>NGIRPSS<br>LDQMAK                    | 2,092.00 |
| Control | 6011 | mitochon<br>drial<br>trifunctio<br>nal<br>protein,<br>beta<br>subunit<br>precursor                          | gi 1462318<br>62,gi 27885<br>005,gi 2832<br>715,gi 6015<br>048,gi 7426<br>8350 | 51,329.00  | 99.80%  | 2  | 2  | 2  | 0.02% | 8.21%  | TPFLLSG 4.54<br>TSYKDL<br>MPHDLA<br>R              | 2,278.15 |
| Control | 6011 | Heat<br>shock<br>70kDa<br>protein 5<br>(glucose-<br>regulated<br>protein,<br>78kDa)                         | gi 1113084<br>68,gi 11549<br>5027,gi 152<br>941210                             | 72,383.60  | 100.00% | 24 | 33 | 59 | 0.46% | 39.70% | AKFEEL 4.03<br>NMDLFR                              | 1,512.75 |
| Control | 6011 | Heat<br>shock<br>70kDa<br>protein 5<br>(glucose-<br>regulated<br>protein,<br>78kDa)                         | gi 1113084<br>68,gi 11549<br>5027,gi 152<br>941210                             | 72,383.60  | 100.00% | 24 | 33 | 59 | 0.46% | 39.70% | DAGTIA 3.76<br>GLNVMR                              | 1,233.63 |

|         |      |                                                               |                                           |           |         |    |    |    |       |        |                     |      |          |
|---------|------|---------------------------------------------------------------|-------------------------------------------|-----------|---------|----|----|----|-------|--------|---------------------|------|----------|
| Control | 6011 | Heat shock 70kDa protein 5 (glucose-regulated protein, 78kDa) | gi 1113084.68.gi 11549.5027.gi 152.941210 | 72,383.60 | 100.00% | 24 | 33 | 59 | 0.46% | 39.70% | DNHLLGTFDLTGI PPAPR | 2.56 | 1,934.01 |
| Control | 6011 | Heat shock 70kDa protein 5 (glucose-regulated protein, 78kDa) | gi 1113084.68.gi 11549.5027.gi 152.941210 | 72,383.60 | 100.00% | 24 | 33 | 59 | 0.46% | 39.70% | ELEEIVQPIISK        | 4.28 | 1,397.79 |
| Control | 6011 | Heat shock 70kDa protein 5 (glucose-regulated protein, 78kDa) | gi 1113084.68.gi 11549.5027.gi 152.941210 | 72,383.60 | 100.00% | 24 | 33 | 59 | 0.46% | 39.70% | FEELNMDLFR          | 2.97 | 1,329.61 |
| Control | 6011 | Heat shock 70kDa protein 5 (glucose-regulated protein, 78kDa) | gi 1113084.68.gi 11549.5027.gi 152.941210 | 72,383.60 | 100.00% | 24 | 33 | 59 | 0.46% | 39.70% | IDTRNEL ESYAYS LK   | 4.42 | 1,801.90 |
| Control | 6011 | Heat shock 70kDa protein 5 (glucose-regulated protein, 78kDa) | gi 1113084.68.gi 11549.5027.gi 152.941210 | 72,383.60 | 100.00% | 24 | 33 | 59 | 0.46% | 39.70% | IEIESFYEGEDFSE TLTR | 3.05 | 2,164.99 |
| Control | 6011 | Heat shock 70kDa protein 5 (glucose-regulated protein, 78kDa) | gi 1113084.68.gi 11549.5027.gi 152.941210 | 72,383.60 | 100.00% | 24 | 33 | 59 | 0.46% | 39.70% | IINEPTAAAIAYG LDK   | 4.4  | 1,659.90 |
| Control | 6011 | Heat shock 70kDa protein 5 (glucose-regulated protein, 78kDa) | gi 1113084.68.gi 11549.5027.gi 152.941210 | 72,383.60 | 100.00% | 24 | 33 | 59 | 0.46% | 39.70% | ITPSYVAFTPGER       | 4.17 | 1,566.78 |
| Control | 6011 | Heat shock 70kDa protein 5 (glucose-regulated protein, 78kDa) | gi 1113084.68.gi 11549.5027.gi 152.941210 | 72,383.60 | 100.00% | 24 | 33 | 59 | 0.46% | 39.70% | KKELEEIVQPIISK      | 4.16 | 1,653.98 |

|         |      |                                                               |                                           |           |         |    |    |    |       |        |                      |      |          |
|---------|------|---------------------------------------------------------------|-------------------------------------------|-----------|---------|----|----|----|-------|--------|----------------------|------|----------|
| Control | 6011 | Heat shock 70kDa protein 5 (glucose-regulated protein, 78kDa) | gi 1113084.68.gi 11549.5027.gi 152.941210 | 72,383.60 | 100.00% | 24 | 33 | 59 | 0.46% | 39.70% | KSQIFST ASDNQP TVTIK | 4.72 | 1,965.03 |
| Control | 6011 | Heat shock 70kDa protein 5 (glucose-regulated protein, 78kDa) | gi 1113084.68.gi 11549.5027.gi 152.941210 | 72,383.60 | 100.00% | 24 | 33 | 59 | 0.46% | 39.70% | MKETAE AYLGKK        | 3.13 | 1,384.71 |
| Control | 6011 | Heat shock 70kDa protein 5 (glucose-regulated protein, 78kDa) | gi 1113084.68.gi 11549.5027.gi 152.941210 | 72,383.60 | 100.00% | 24 | 33 | 59 | 0.46% | 39.70% | MVNDAE KFAEED K      | 2.57 | 1,541.68 |
| Control | 6011 | Heat shock 70kDa protein 5 (glucose-regulated protein, 78kDa) | gi 1113084.68.gi 11549.5027.gi 152.941210 | 72,383.60 | 100.00% | 24 | 33 | 59 | 0.46% | 39.70% | MVNDAE KFAEED KK     | 3.77 | 1,669.77 |
| Control | 6011 | Heat shock 70kDa protein 5 (glucose-regulated protein, 78kDa) | gi 1113084.68.gi 11549.5027.gi 152.941210 | 72,383.60 | 100.00% | 24 | 33 | 59 | 0.46% | 39.70% | NELESY AYSLK         | 3.6  | 1,316.64 |
| Control | 6011 | Heat shock 70kDa protein 5 (glucose-regulated protein, 78kDa) | gi 1113084.68.gi 11549.5027.gi 152.941210 | 72,383.60 | 100.00% | 24 | 33 | 59 | 0.46% | 39.70% | NQLTSN PENTVF DAK    | 3.91 | 1,677.81 |
| Control | 6011 | Heat shock 70kDa protein 5 (glucose-regulated protein, 78kDa) | gi 1113084.68.gi 11549.5027.gi 152.941210 | 72,383.60 | 100.00% | 24 | 33 | 59 | 0.46% | 39.70% | NQLTSN PENTVF DAKR   | 4.02 | 1,833.91 |
| Control | 6011 | Heat shock 70kDa protein 5 (glucose-regulated protein, 78kDa) | gi 1113084.68.gi 11549.5027.gi 152.941210 | 72,383.60 | 100.00% | 24 | 33 | 59 | 0.46% | 39.70% | SDIDEIV LVGGST R     | 2.83 | 1,460.76 |

|         |      |                                                               |                                                                                                             |           |         |    |    |    |       |        |                                    |      |          |
|---------|------|---------------------------------------------------------------|-------------------------------------------------------------------------------------------------------------|-----------|---------|----|----|----|-------|--------|------------------------------------|------|----------|
| Control | 6011 | Heat shock 70kDa protein 5 (glucose-regulated protein, 78kDa) | gi 1113084.68.gi 11549.5027.gi 152.941210                                                                   | 72,383.60 | 100.00% | 24 | 33 | 59 | 0.46% | 39.70% | SQIFSTA<br>SDNQPT<br>VTIK          | 4.13 | 1,836.93 |
| Control | 6011 | Heat shock 70kDa protein 5 (glucose-regulated protein, 78kDa) | gi 1113084.68.gi 11549.5027.gi 152.941210                                                                   | 72,383.60 | 100.00% | 24 | 33 | 59 | 0.46% | 39.70% | TFAPEEI<br>SAMVLT<br>K             | 4.17 | 1,552.79 |
| Control | 6011 | Heat shock 70kDa protein 5 (glucose-regulated protein, 78kDa) | gi 1113084.68.gi 11549.5027.gi 152.941210                                                                   | 72,383.60 | 100.00% | 24 | 33 | 59 | 0.46% | 39.70% | TKPYIQV<br>DVGGGQ<br>TK            | 4.6  | 1,590.85 |
| Control | 6011 | Heat shock 70kDa protein 5 (glucose-regulated protein, 78kDa) | gi 1113084.68.gi 11549.5027.gi 152.941210                                                                   | 72,383.60 | 100.00% | 24 | 33 | 59 | 0.46% | 39.70% | TWNDPS<br>VQQDIK                   | 2.58 | 1,430.69 |
| Control | 6011 | Heat shock 70kDa protein 5 (glucose-regulated protein, 78kDa) | gi 1113084.68.gi 11549.5027.gi 152.941210                                                                   | 72,383.60 | 100.00% | 24 | 33 | 59 | 0.46% | 39.70% | VLESD<br>LKKSDID<br>EIVLVG<br>GSTR | 5.02 | 2,488.31 |
| Control | 6011 | Heat shock 70kDa protein 5 (glucose-regulated protein, 78kDa) | gi 1113084.68.gi 11549.5027.gi 152.941210                                                                   | 72,383.60 | 100.00% | 24 | 33 | 59 | 0.46% | 39.70% | VTHAVV<br>TVPAYF<br>NDAQR          | 4.25 | 1,887.97 |
| Control | 6011 | Junction plakoglobin in                                       | gi 1096581.66.gi 15739.1363.gi 158.065994.gi 2.0336613.gi 211637709.gi 2181030.15.gi 51316.492.gi 5159.1897 | 81,804.10 | 100.00% | 5  | 6  | 10 | 0.08% | 12.90% | LLNDED<br>PVVVTK                   | 3.13 | 1,341.73 |
| Control | 6011 | Junction plakoglobin in                                       | gi 1096581.66.gi 15739.1363.gi 158.065994.gi 2.0336613.gi 211637709.gi 2181030.15.gi 51316.492.gi 5159.1897 | 81,804.10 | 100.00% | 5  | 6  | 10 | 0.08% | 12.90% | LNTIPLF<br>VQLLYS<br>SVENIQR       | 3.96 | 2,347.30 |

|         |      |                             |                                                                                                                                          |           |         |   |   |    |       |        |                                                                      |          |
|---------|------|-----------------------------|------------------------------------------------------------------------------------------------------------------------------------------|-----------|---------|---|---|----|-------|--------|----------------------------------------------------------------------|----------|
| Control | 6011 | Junction<br>plakoglob<br>in | gi 1096581<br>66,gi 15739<br>1363,gi 158<br>065994,gi 2<br>0336613,gi <br>211637709,<br>gi 2181030<br>15,gi 51316<br>492,gi 5159<br>1897 | 81,804.10 | 100.00% | 5 | 6 | 10 | 0.08% | 12.90% | MLSSPV 4.42<br>ESVLFY<br>AITTLHN<br>LLLYQE<br>GAK                    | 3,153.65 |
| Control | 6011 | Junction<br>plakoglob<br>in | gi 1096581<br>66,gi 15739<br>1363,gi 158<br>065994,gi 2<br>0336613,gi <br>211637709,<br>gi 2181030<br>15,gi 51316<br>492,gi 5159<br>1897 | 81,804.10 | 100.00% | 5 | 6 | 10 | 0.08% | 12.90% | SAIVHLI 3.93<br>NYQDDA<br>ELATR                                      | 2,029.04 |
| Control | 6011 | Junction<br>plakoglob<br>in | gi 1096581<br>66,gi 15739<br>1363,gi 158<br>065994,gi 2<br>0336613,gi <br>211637709,<br>gi 2181030<br>15,gi 51316<br>492,gi 5159<br>1897 | 81,804.10 | 100.00% | 5 | 6 | 10 | 0.08% | 12.90% | TLVTQN 2.72<br>SGVEALI<br>HAILR                                      | 1,935.10 |
| Control | 6011 | tubulin,<br>beta 6          | gi 1140521<br>48,gi 87578<br>360                                                                                                         | 49,882.10 | 99.80%  | 2 | 2 | 2  | 0.02% | 29.60% | AALVDL 3.05<br>EPGTMD<br>SVR                                         | 1,589.78 |
| Control | 6011 | tubulin,<br>beta 6          | gi 1140521<br>48,gi 87578<br>360                                                                                                         | 49,882.10 | 99.80%  | 2 | 2 | 2  | 0.02% | 29.60% | ALTVPE 2.54<br>LTQQMF<br>DAK                                         | 1,707.86 |
| Control | 6011 | tubulin,<br>beta 6          | gi 1140521<br>48,gi 87578<br>360                                                                                                         | 49,882.10 | 99.80%  | 2 | 2 | 2  | 0.02% | 29.60% | FPGQLN 3.12<br>ADLRK                                                 | 1,258.69 |
| Control | 6011 | tubulin,<br>beta 6          | gi 1140521<br>48,gi 87578<br>360                                                                                                         | 49,882.10 | 99.80%  | 2 | 2 | 2  | 0.02% | 29.60% | GHYTEG 3.66<br>AELVDS<br>VLDVVR                                      | 1,958.98 |
| Control | 6011 | tubulin,<br>beta 6          | gi 1140521<br>48,gi 87578<br>360                                                                                                         | 49,882.10 | 99.80%  | 2 | 2 | 2  | 0.02% | 29.60% | GHYTEG 3.32<br>AELVDS<br>VLDVVR<br>K                                 | 2,087.08 |
| Control | 6011 | tubulin,<br>beta 6          | gi 1140521<br>48,gi 87578<br>360                                                                                                         | 49,882.10 | 99.80%  | 2 | 2 | 2  | 0.02% | 29.60% | LAVNMV 3.55<br>PFPR                                                  | 1,159.63 |
| Control | 6011 | tubulin,<br>beta 6          | gi 1140521<br>48,gi 87578<br>360                                                                                                         | 49,882.10 | 99.80%  | 2 | 2 | 2  | 0.02% | 29.60% | LHFFMP 3.73<br>GFAPLT<br>AR                                          | 1,620.84 |
| Control | 6011 | tubulin,<br>beta 6          | gi 1140521<br>48,gi 87578<br>360                                                                                                         | 49,882.10 | 99.80%  | 2 | 2 | 2  | 0.02% | 29.60% | VSDTVV 4.94<br>EPYNAT<br>LSVHQL<br>VENTDE<br>TYCIDNE<br>ALYDICF<br>R | 4,479.06 |
| Control | 6011 | tubulin,<br>beta 6          | gi 1140521<br>48,gi 87578<br>360                                                                                                         | 49,882.10 | 99.80%  | 2 | 2 | 2  | 0.02% | 29.60% | YLTVAA 2.56<br>VFR                                                   | 1,039.59 |

|         |      |                                                                                                                                                                                                                        |                                                                   |           |         |   |   |   |       |        |                                  |      |          |
|---------|------|------------------------------------------------------------------------------------------------------------------------------------------------------------------------------------------------------------------------|-------------------------------------------------------------------|-----------|---------|---|---|---|-------|--------|----------------------------------|------|----------|
| Control | 6011 | RecName<br>:<br>Full=Rab<br>GDP<br>dissociati<br>on<br>inhibitor<br>beta;<br>Short=Ra<br>b GDI<br>beta;<br>AltName:<br>Full=Gua<br>nosine<br>diphosph<br>ate<br>dissociati<br>on<br>inhibitor<br>2;<br>Short=G<br>DI-2 | gi 1099397<br>13,gi 14623<br>1738,gi 757<br>73612,gi 76<br>253900 | 50,472.30 | 100.00% | 3 | 4 | 4 | 0.03% | 11.20% | FVSISDL<br>LVPK                  | 2.62 | 1,217.71 |
| Control | 6011 | RecName<br>:<br>Full=Rab<br>GDP<br>dissociati<br>on<br>inhibitor<br>beta;<br>Short=Ra<br>b GDI<br>beta;<br>AltName:<br>Full=Gua<br>nosine<br>diphosph<br>ate<br>dissociati<br>on<br>inhibitor<br>2;<br>Short=G<br>DI-2 | gi 1099397<br>13,gi 14623<br>1738,gi 757<br>73612,gi 76<br>253900 | 50,472.30 | 100.00% | 3 | 4 | 4 | 0.03% | 11.20% | KFDLGQ<br>DVIDFTG<br>HALALY<br>R | 6.25 | 2,279.18 |
| Control | 6011 | RecName<br>:<br>Full=Rab<br>GDP<br>dissociati<br>on<br>inhibitor<br>beta;<br>Short=Ra<br>b GDI<br>beta;<br>AltName:<br>Full=Gua<br>nosine<br>diphosph<br>ate<br>dissociati<br>on<br>inhibitor<br>2;<br>Short=G<br>DI-2 | gi 1099397<br>13,gi 14623<br>1738,gi 757<br>73612,gi 76<br>253900 | 50,472.30 | 100.00% | 3 | 4 | 4 | 0.03% | 11.20% | SPYLYPL<br>YGLGEL<br>PQGFAR      | 5.46 | 2,141.11 |

|         |      |                                                                                                                                                               |                                                                 |            |         |   |   |   |       |        |                         |      |          |
|---------|------|---------------------------------------------------------------------------------------------------------------------------------------------------------------|-----------------------------------------------------------------|------------|---------|---|---|---|-------|--------|-------------------------|------|----------|
| Control | 6011 | RecName<br>:<br>Full=60S<br>ribosomal<br>protein<br>L11                                                                                                       | gi 1088609<br>25,gi 11549<br>7634,gi 742<br>68362               | 20,235.20  | 99.80%  | 2 | 2 | 3 | 0.02% | 12.90% | VLEQLT<br>GQTPVF<br>SK  | 4.38 | 1,546.85 |
| Control | 6011 | RecName<br>:<br>Full=60S<br>ribosomal<br>protein<br>L11                                                                                                       | gi 1088609<br>25,gi 11549<br>7634,gi 742<br>68362               | 20,235.20  | 99.80%  | 2 | 2 | 3 | 0.02% | 12.90% | YDGILP<br>GK            | 2.57 | 975.5512 |
| Control | 6011 | syntaxin<br>7                                                                                                                                                 | gi 1181508<br>40,gi 12214<br>0829,gi 735<br>86654               | 29,638.60  | 99.80%  | 2 | 2 | 2 | 0.02% | 10.70% | EFGSLPT<br>TPSDQR       | 2.83 | 1,434.69 |
| Control | 6011 | syntaxin<br>7                                                                                                                                                 | gi 1181508<br>40,gi 12214<br>0829,gi 735<br>86654               | 29,638.60  | 99.80%  | 2 | 2 | 2 | 0.02% | 10.70% | TLNQLG<br>TPQDSPE<br>LR | 4.59 | 1,668.86 |
| Control | 6011 | SEC11<br>homolog<br>A (S.<br>cerevisiae<br>)                                                                                                                  | gi 1515546<br>19,gi 27806<br>149,gi 5403<br>9632,gi 697<br>9934 | 20,607.80  | 100.00% | 4 | 5 | 7 | 0.05% | 19.60% | GDLLFL<br>TNR           | 2.59 | 1,048.58 |
| Control | 6011 | SEC11<br>homolog<br>A (S.<br>cerevisiae<br>)                                                                                                                  | gi 1515546<br>19,gi 27806<br>149,gi 5403<br>9632,gi 697<br>9934 | 20,607.80  | 100.00% | 4 | 5 | 7 | 0.05% | 19.60% | GDLLFL<br>TNRVED<br>PIR | 3.93 | 1,757.95 |
| Control | 6011 | SEC11<br>homolog<br>A (S.<br>cerevisiae<br>)                                                                                                                  | gi 1515546<br>19,gi 27806<br>149,gi 5403<br>9632,gi 697<br>9934 | 20,607.80  | 100.00% | 4 | 5 | 7 | 0.05% | 19.60% | MLSLDF<br>LDDVRR        | 2.08 | 1,495.76 |
| Control | 6011 | SEC11<br>homolog<br>A (S.<br>cerevisiae<br>)                                                                                                                  | gi 1515546<br>19,gi 27806<br>149,gi 5403<br>9632,gi 697<br>9934 | 20,607.80  | 100.00% | 4 | 5 | 7 | 0.05% | 19.60% | VGEIVVF<br>R            | 2.92 | 918.5407 |
| Control | 6011 | CAND1<br>protein                                                                                                                                              | gi 1544260<br>08,gi 15537<br>2073,gi 182<br>627583              | 136,363.10 | 99.80%  | 2 | 2 | 2 | 0.02% | 2.36%  | ISGSILN<br>ELIGLVR      | 4.61 | 1,483.88 |
| Control | 6011 | CAND1<br>protein                                                                                                                                              | gi 1544260<br>08,gi 15537<br>2073,gi 182<br>627583              | 136,363.10 | 99.80%  | 2 | 2 | 2 | 0.02% | 2.36%  | SVILEAF<br>SSPSEEV<br>K | 3.06 | 1,621.83 |
| Control | 6011 | RecName<br>:<br>Full=Acy<br>l-protein<br>thioestera<br>se 1;<br>AltName:<br>Full=Lys<br>ophospho<br>lipase 1;<br>AltName:<br>Full=Lys<br>ophospho<br>lipase I | gi 1153116<br>36,gi 75948<br>308,gi 7773<br>6321                | 24,578.40  | 99.80%  | 2 | 2 | 2 | 0.02% | 10.40% | ASFPQGP<br>IGGVNR       | 2.43 | 1,299.68 |



|         |      |                                                                                                                                                               |                                                                   |           |         |   |    |    |       |        |                                                  |      |          |
|---------|------|---------------------------------------------------------------------------------------------------------------------------------------------------------------|-------------------------------------------------------------------|-----------|---------|---|----|----|-------|--------|--------------------------------------------------|------|----------|
| Control | 6011 | RecName<br>:<br>Full=Acy<br>l-protein<br>thioestera<br>se 1;<br>AltName:<br>Full=Lys<br>ophospho<br>lipase 1;<br>AltName:<br>Full=Lys<br>ophospho<br>lipase I | gi 1153116<br>36,gi 75948<br>308,gi 7773<br>6321                  | 24,578.40 | 99.80%  | 2 | 2  | 2  | 0.02% | 10.40% | TLVNPA<br>NVTFR                                  | 2.62 | 1,231.68 |
| Control | 6011 | PREDIC<br>TED:<br>brain<br>protein<br>44                                                                                                                      | gi 1198890<br>10,gi 19466<br>5199                                 | 14,264.40 | 99.80%  | 2 | 3  | 4  | 0.03% | 18.90% | LRPLYN<br>HPAGPR                                 | 3.5  | 1,390.77 |
| Control | 6011 | PREDIC<br>TED:<br>brain<br>protein<br>44                                                                                                                      | gi 1198890<br>10,gi 19466<br>5199                                 | 14,264.40 | 99.80%  | 2 | 3  | 4  | 0.03% | 18.90% | VLDKVE<br>LLLPEK                                 | 3.8  | 1,395.85 |
| Control | 6011 | SLC3A2<br>protein                                                                                                                                             | gi 1153049<br>25,gi 16444<br>8600,gi 598<br>57795,gi 74<br>354296 | 63,166.50 | 100.00% | 9 | 12 | 18 | 0.14% | 21.30% | FLVVLN<br>FGDVGQ<br>LAR                          | 4.7  | 1,647.92 |
| Control | 6011 | SLC3A2<br>protein                                                                                                                                             | gi 1153049<br>25,gi 16444<br>8600,gi 598<br>57795,gi 74<br>354296 | 63,166.50 | 100.00% | 9 | 12 | 18 | 0.14% | 21.30% | FTGLSKE<br>ELLK                                  | 3.63 | 1,264.71 |
| Control | 6011 | SLC3A2<br>protein                                                                                                                                             | gi 1153049<br>25,gi 16444<br>8600,gi 598<br>57795,gi 74<br>354296 | 63,166.50 | 100.00% | 9 | 12 | 18 | 0.14% | 21.30% | LLIAGTD<br>SSDLQQI<br>LR                         | 5.73 | 1,742.97 |
| Control | 6011 | SLC3A2<br>protein                                                                                                                                             | gi 1153049<br>25,gi 16444<br>8600,gi 598<br>57795,gi 74<br>354296 | 63,166.50 | 100.00% | 9 | 12 | 18 | 0.14% | 21.30% | NQEDDL<br>TETNLE<br>QIDPIFG<br>SK                | 4.55 | 2,406.13 |
| Control | 6011 | SLC3A2<br>protein                                                                                                                                             | gi 1153049<br>25,gi 16444<br>8600,gi 598<br>57795,gi 74<br>354296 | 63,166.50 | 100.00% | 9 | 12 | 18 | 0.14% | 21.30% | NQEDDL<br>TETNLE<br>QIDPIFG<br>SKEDFES<br>LLHSAK | 4.7  | 3,662.73 |
| Control | 6011 | SLC3A2<br>protein                                                                                                                                             | gi 1153049<br>25,gi 16444<br>8600,gi 598<br>57795,gi 74<br>354296 | 63,166.50 | 100.00% | 9 | 12 | 18 | 0.14% | 21.30% | SLLHGD<br>FYDLSS<br>GPDFLS<br>YIR                | 2.95 | 2,402.17 |
| Control | 6011 | SLC3A2<br>protein                                                                                                                                             | gi 1153049<br>25,gi 16444<br>8600,gi 598<br>57795,gi 74<br>354296 | 63,166.50 | 100.00% | 9 | 12 | 18 | 0.14% | 21.30% | SVSEDR<br>LLIAGTD<br>SSDLQQI<br>LR               | 2.98 | 2,416.27 |
| Control | 6011 | SLC3A2<br>protein                                                                                                                                             | gi 1153049<br>25,gi 16444<br>8600,gi 598<br>57795,gi 74<br>354296 | 63,166.50 | 100.00% | 9 | 12 | 18 | 0.14% | 21.30% | VDLLLS<br>TQPGR                                  | 3.32 | 1,198.68 |

|         |      |                                            |                                                   |           |         |   |    |    |       |        |                                       |      |          |
|---------|------|--------------------------------------------|---------------------------------------------------|-----------|---------|---|----|----|-------|--------|---------------------------------------|------|----------|
| Control | 6011 | SLC3A2 protein                             | gi 115304925,gi 164448600,gi 59857795,gi 74354296 | 63,166.50 | 100.00% | 9 | 12 | 18 | 0.14% | 21.30% | VILDLTP<br>NYK                        | 3.32 | 1,175.67 |
| Control | 6011 | MHC class I antigen                        | gi 84095083                                       | 40,657.50 | 100.00% | 9 | 11 | 67 | 0.52% | 28.20% | DYIALNE<br>DLR                        | 3.86 | 1,221.61 |
| Control | 6011 | MHC class I antigen                        | gi 84095083                                       | 40,657.50 | 100.00% | 9 | 11 | 67 | 0.52% | 28.20% | EGEDQT<br>QDMELV<br>ETRPSG<br>DGTFFQK | 2.99 | 2,713.19 |
| Control | 6011 | MHC class I antigen                        | gi 84095083                                       | 40,657.50 | 100.00% | 9 | 11 | 67 | 0.52% | 28.20% | FIAVGY<br>VDDTQF<br>VR                | 5.22 | 1,629.83 |
| Control | 6011 | MHC class I antigen                        | gi 84095083                                       | 40,657.50 | 100.00% | 9 | 11 | 67 | 0.52% | 28.20% | QDAYDG<br>RDYIAL<br>NEDLR             | 3.51 | 2,026.95 |
| Control | 6011 | MHC class I antigen                        | gi 84095083                                       | 40,657.50 | 100.00% | 9 | 11 | 67 | 0.52% | 28.20% | RYLENG<br>KDTLLR                      | 3.56 | 1,477.81 |
| Control | 6011 | MHC class I antigen                        | gi 84095083                                       | 40,657.50 | 100.00% | 9 | 11 | 67 | 0.52% | 28.20% | VQHEGL<br>QEPLTLR                     | 4.25 | 1,519.82 |
| Control | 6011 | MHC class I antigen                        | gi 84095083                                       | 40,657.50 | 100.00% | 9 | 11 | 67 | 0.52% | 28.20% | WAALVV<br>R<br>PSGEEQ                 | 3.44 | 1,441.74 |
| Control | 6011 | MHC class I antigen                        | gi 84095083                                       | 40,657.50 | 100.00% | 9 | 11 | 67 | 0.52% | 28.20% | YFYTAV<br>SR                          | 2.61 | 1,006.50 |
| Control | 6011 | MHC class I antigen                        | gi 84095083                                       | 40,657.50 | 100.00% | 9 | 11 | 67 | 0.52% | 28.20% | YLENGK<br>DTLLR                       | 2.24 | 1,321.71 |
| Control | 6011 | eukaryotic translation elongation factor 2 | gi 115497900,gi 74353984,gi 88909609              | 95,352.20 | 100.00% | 6 | 8  | 10 | 0.08% | 11.10% | ALLELQ<br>LEPEELY<br>QTFQR            | 4.96 | 2,220.15 |
| Control | 6011 | eukaryotic translation elongation factor 2 | gi 115497900,gi 74353984,gi 88909609              | 95,352.20 | 100.00% | 6 | 8  | 10 | 0.08% | 11.10% | ARPPFD<br>GLAEDID<br>KGEVSA<br>R      | 4.81 | 2,143.08 |
| Control | 6011 | eukaryotic translation elongation factor 2 | gi 115497900,gi 74353984,gi 88909609              | 95,352.20 | 100.00% | 6 | 8  | 10 | 0.08% | 11.10% | EGIPALD<br>NFLDKL                     | 2.44 | 1,444.77 |
| Control | 6011 | eukaryotic translation elongation factor 2 | gi 115497900,gi 74353984,gi 88909609              | 95,352.20 | 100.00% | 6 | 8  | 10 | 0.08% | 11.10% | STAISLF<br>YELSEN<br>DLNFIK           | 3.99 | 2,204.11 |
| Control | 6011 | eukaryotic translation elongation factor 2 | gi 115497900,gi 74353984,gi 88909609              | 95,352.20 | 100.00% | 6 | 8  | 10 | 0.08% | 11.10% | TGTITTF<br>EHAHNM<br>R                | 2.67 | 1,631.76 |

|         |      |                                                                                                                                                                                         |                                      |           |         |   |   |    |       |        |                        |      |          |
|---------|------|-----------------------------------------------------------------------------------------------------------------------------------------------------------------------------------------|--------------------------------------|-----------|---------|---|---|----|-------|--------|------------------------|------|----------|
| Control | 6011 | eukaryotic translation elongation factor 2                                                                                                                                              | gi 115497900,gi 74353984,gi 88909609 | 95,352.20 | 100.00% | 6 | 8 | 10 | 0.08% | 11.10% | VFSGLV<br>STGLK        | 2.98 | 1,107.64 |
| Control | 6011 | RecName: Full=Serine palmitoyl transferase 1; AltName: Full=Serine-palmitoyl-CoA transferase 1; Short=SP T1; Short=SP T1; AltName: Full=Long chain base biosynthesis protein 1; Short=L | gi 122139929,gi 75948211,gi 77736443 | 52,771.80 | 100.00% | 3 | 4 | 5  | 0.04% | 8.88%  | LLKEQEI<br>EDQKNP<br>R | 4.91 | 1,739.93 |
| Control | 6011 | RecName: Full=Serine palmitoyl transferase 1; AltName: Full=Serine-palmitoyl-CoA transferase 1; Short=SP T1; Short=SP T1; AltName: Full=Long chain base biosynthesis protein 1; Short=L | gi 122139929,gi 75948211,gi 77736443 | 52,771.80 | 100.00% | 3 | 4 | 5  | 0.04% | 8.88%  | VVVTVE<br>QTEEDL<br>EK | 3.52 | 1,617.82 |

|         |      |                                                                                                                                                                                                                                                                                                            |           |         |   |   |   |       |        |                                                   |          |
|---------|------|------------------------------------------------------------------------------------------------------------------------------------------------------------------------------------------------------------------------------------------------------------------------------------------------------------|-----------|---------|---|---|---|-------|--------|---------------------------------------------------|----------|
| Control | 6011 | RecName gi 1221399<br>: 29,gi 75948<br>Full=Seri 211,gi 7773<br>ne 6443<br>palmitoyl<br>transferase 1;<br>AltName:<br>Full=Seri<br>ne-<br>palmitoyl-<br>CoA<br>transferase<br>1;<br>Short=SP<br>T 1;<br>Short=SP<br>T1;<br>AltName:<br>Full=Long<br>chain<br>base<br>biosynthesis<br>protein 1;<br>Short=L | 52,771.80 | 100.00% | 3 | 4 | 5 | 0.04% | 8.88%  | VVVTVE 3.08<br>QTEEDL<br>EKAASTI<br>SEVAQT<br>VLL | 3,001.58 |
| Control | 6011 | RecName gi 1185724<br>: 89,gi 75773<br>Full=Calcium/calm<br>odulin-<br>dependent<br>protein<br>kinase<br>type II<br>beta<br>chain;<br>Short=Ca<br>M-kinase<br>II beta<br>chain;<br>Short=Ca<br>M kinase<br>II subunit<br>beta;<br>Short=Ca<br>MK-II<br>subunit<br>beta                                     | 60,464.50 | 100.00% | 3 | 3 | 3 | 0.02% | 13.10% | DLKPEN 3.45<br>LLLASK                             | 1,340.78 |

|         |      |                                                                                                                                                                                                                           |           |         |   |   |   |       |        |                                                    |          |
|---------|------|---------------------------------------------------------------------------------------------------------------------------------------------------------------------------------------------------------------------------|-----------|---------|---|---|---|-------|--------|----------------------------------------------------|----------|
| Control | 6011 | RecName gi 1185724 : 89,gi 75773 Full=Calc 666,gi 7836 ium/calm 9262 odulin-dependen t protein kinase type II beta chain; Short=Ca M-kinase II beta chain; Short=Ca M kinase II subunit beta; Short=Ca MK-II subunit beta | 60,464.50 | 100.00% | 3 | 3 | 3 | 0.02% | 13.10% | LHDSISE 2.9<br>EGFHYL<br>VFDLVT<br>GGELFE<br>DIVAR | 3,407.68 |
| Control | 6011 | RecName gi 1185724 : 89,gi 75773 Full=Calc 666,gi 7836 ium/calm 9262 odulin-dependen t protein kinase type II beta chain; Short=Ca M-kinase II beta chain; Short=Ca M kinase II subunit beta; Short=Ca MK-II subunit beta | 60,464.50 | 100.00% | 3 | 3 | 3 | 0.02% | 13.10% | QTTAPA 2.6<br>TMSTAA<br>SGATMG<br>LVEQAK<br>SLLNK  | 2,894.46 |



|         |      |                                                            |                                                  |           |         |   |   |   |       |        |                       |      |          |
|---------|------|------------------------------------------------------------|--------------------------------------------------|-----------|---------|---|---|---|-------|--------|-----------------------|------|----------|
| Control | 6011 | negative response regulator [Escherichia coli]             | gi 57996866                                      | 20,725.50 | 99.80%  | 2 | 2 | 2 | 0.02% | 13.90% | AGGGSAA TLMSGQ AAAR   | 3.8  | 1,421.68 |
| Control | 6011 | negative response regulator [Escherichia coli]             | gi 57996866                                      | 20,725.50 | 99.80%  | 2 | 2 | 2 | 0.02% | 13.90% | IQNAGT EVVEAK         | 3.15 | 1,258.66 |
| Control | 6011 | PREDICTED: similar to Calpain-5 (nCL-3) (htra-3) isoform 1 | gi 76636134                                      | 72,988.00 | 100.00% | 4 | 5 | 5 | 0.04% | 10.20% | ANADDL QALHTL HLR     | 3.09 | 1,687.89 |
| Control | 6011 | PREDICTED: similar to Calpain-5 (nCL-3) (htra-3) isoform 1 | gi 76636134                                      | 72,988.00 | 100.00% | 4 | 5 | 5 | 0.04% | 10.20% | DSPTGA NSYVIK         | 3.72 | 1,364.71 |
| Control | 6011 | PREDICTED: similar to Calpain-5 (nCL-3) (htra-3) isoform 1 | gi 76636134                                      | 72,988.00 | 100.00% | 4 | 5 | 5 | 0.04% | 10.20% | VLFEDP NFPATD DSLYYK  | 2.99 | 2,134.00 |
| Control | 6011 | PREDICTED: similar to Calpain-5 (nCL-3) (htra-3) isoform 1 | gi 76636134                                      | 72,988.00 | 100.00% | 4 | 5 | 5 | 0.04% | 10.20% | YVIPTT FEPGHT GEFLLR  | 3.85 | 2,190.16 |
| Control | 6011 | RAB5C, member RAS oncogene family                          | gi 109659170,gi 61553191,gi 75052596,gi 77736431 | 23,448.70 | 100.00% | 4 | 5 | 7 | 0.05% | 25.90% | GAQAAI VVYDIT NTDTFAR | 2.94 | 2,026.02 |
| Control | 6011 | RAB5C, member RAS oncogene family                          | gi 109659170,gi 61553191,gi 75052596,gi 77736431 | 23,448.70 | 100.00% | 4 | 5 | 7 | 0.05% | 25.90% | GVDLQE NNPASR         | 2.8  | 1,299.63 |
| Control | 6011 | RAB5C, member RAS oncogene family                          | gi 109659170,gi 61553191,gi 75052596,gi 77736431 | 23,448.70 | 100.00% | 4 | 5 | 7 | 0.05% | 25.90% | LVLLGE SAVGK          | 3.1  | 1,085.66 |
| Control | 6011 | RAB5C, member RAS oncogene family                          | gi 109659170,gi 61553191,gi 75052596,gi 77736431 | 23,448.70 | 100.00% | 4 | 5 | 7 | 0.05% | 25.90% | QASPNIV IALAGN K      | 2.85 | 1,395.80 |

|         |      |                                                                                            |                                   |           |         |   |   |    |       |        |                                  |          |
|---------|------|--------------------------------------------------------------------------------------------|-----------------------------------|-----------|---------|---|---|----|-------|--------|----------------------------------|----------|
| Control | 6011 | PREDIC<br>TED:<br>similar to<br>RAB6A,<br>member<br>RAS<br>oncogene<br>family<br>isoform 2 | gi 1199075<br>95,gi 11990<br>7597 | 23,545.30 | 100.00% | 5 | 6 | 12 | 0.09% | 27.40% | ELNVMF 3.51<br>IETSAK            | 1,397.70 |
| Control | 6011 | PREDIC<br>TED:<br>similar to<br>RAB6A,<br>member<br>RAS<br>oncogene<br>family<br>isoform 2 | gi 1199075<br>95,gi 11990<br>7597 | 23,545.30 | 100.00% | 5 | 6 | 12 | 0.09% | 27.40% | GSDVIIM 3.13<br>LVGNK            | 1,261.68 |
| Control | 6011 | PREDIC<br>TED:<br>similar to<br>RAB6A,<br>member<br>RAS<br>oncogene<br>family<br>isoform 2 | gi 1199075<br>95,gi 11990<br>7597 | 23,545.30 | 100.00% | 5 | 6 | 12 | 0.09% | 27.40% | GSDVIIM 3.24<br>LVGNKT<br>DLADKR | 2,061.10 |
| Control | 6011 | PREDIC<br>TED:<br>similar to<br>RAB6A,<br>member<br>RAS<br>oncogene<br>family<br>isoform 2 | gi 1199075<br>95,gi 11990<br>7597 | 23,545.30 | 100.00% | 5 | 6 | 12 | 0.09% | 27.40% | LQLWDT 2.59<br>AGQER             | 1,316.66 |
| Control | 6011 | PREDIC<br>TED:<br>similar to<br>RAB6A,<br>member<br>RAS<br>oncogene<br>family<br>isoform 2 | gi 1199075<br>95,gi 11990<br>7597 | 23,545.30 | 100.00% | 5 | 6 | 12 | 0.09% | 27.40% | RVAAAL 3.18<br>PGMEST<br>QDR     | 1,617.80 |
| Control | 6011 | PREDIC<br>TED:<br>similar to<br>RAB6A,<br>member<br>RAS<br>oncogene<br>family<br>isoform 2 | gi 1199075<br>95,gi 11990<br>7597 | 23,545.30 | 100.00% | 5 | 6 | 12 | 0.09% | 27.40% | VAAALP 2.7<br>GMESTQ<br>DR       | 1,461.70 |
| Control | 6011 | PREDIC<br>TED:<br>similar to<br>Actin,<br>cytoplas<br>mic 2<br>(Beta-<br>actin-2)          | gi 1946763<br>88                  | 41,854.80 | 99.80%  | 2 | 3 | 4  | 0.03% | 27.40% | DLTDYL 1.87<br>MK                | 1,014.48 |
| Control | 6011 | PREDIC<br>TED:<br>similar to<br>Actin,<br>cytoplas<br>mic 2<br>(Beta-<br>actin-2)          | gi 1946763<br>88                  | 41,854.80 | 99.80%  | 2 | 3 | 4  | 0.03% | 27.40% | GYSFTT 3.43<br>TAER              | 1,132.53 |



|         |      |                                                                                             |                                                  |           |        |   |   |   |       |        |                                                |      |          |
|---------|------|---------------------------------------------------------------------------------------------|--------------------------------------------------|-----------|--------|---|---|---|-------|--------|------------------------------------------------|------|----------|
| Control | 6011 | PREDIC TED: 88<br>similar to Actin, cytoplasmic 2 (Beta-actin-2)                            | gi 1946763                                       | 41,854.80 | 99.80% | 2 | 3 | 4 | 0.03% | 27.40% | HQGVV<br>VGMGQ<br>KDCYVG<br>DEAQS              | 3.83 | 2,383.05 |
| Control | 6011 | PREDIC TED: 88<br>similar to Actin, cytoplasmic 2 (Beta-actin-2)                            | gi 1946763                                       | 41,854.80 | 99.80% | 2 | 3 | 4 | 0.03% | 27.40% | HQGVV<br>VGMGQ<br>KDCYVG<br>DEAQS<br>R         | 3.32 | 2,539.15 |
| Control | 6011 | PREDIC TED: 88<br>similar to Actin, cytoplasmic 2 (Beta-actin-2)                            | gi 1946763                                       | 41,854.80 | 99.80% | 2 | 3 | 4 | 0.03% | 27.40% | IKIAPPE<br>RK                                  | 2.5  | 1,164.75 |
| Control | 6011 | PREDIC TED: 88<br>similar to Actin, cytoplasmic 2 (Beta-actin-2)                            | gi 1946763                                       | 41,854.80 | 99.80% | 2 | 3 | 4 | 0.03% | 27.40% | LDLAGR<br>DLTDYL<br>MK                         | 2.75 | 1,639.84 |
| Control | 6011 | PREDIC TED: 88<br>similar to Actin, cytoplasmic 2 (Beta-actin-2)                            | gi 1946763                                       | 41,854.80 | 99.80% | 2 | 3 | 4 | 0.03% | 27.40% | SYELPD<br>GQVITIG<br>NER                       | 4.51 | 1,790.89 |
| Control | 6011 | PREDIC TED: 88<br>similar to Actin, cytoplasmic 2 (Beta-actin-2)                            | gi 1946763                                       | 41,854.80 | 99.80% | 2 | 3 | 4 | 0.03% | 27.40% | TTGIVM<br>DSGDGV<br>THTVPIY<br>EGYALP<br>HAILR | 6.32 | 3,183.61 |
| Control | 6011 | tyrosine 3-monooxygenase/tryptophan 5-monooxygenase activation protein, epsilon polypeptide | gi 2780619<br>gi 367639<br>gi 711537<br>gi 73586 | 29,157.00 | 99.80% | 2 | 3 | 5 | 0.04% | 15.70% | AAFDDA<br>IAELDTL<br>SEESYK<br>DSTLIM<br>QLLR  | 4.33 | 3,274.60 |

|         |      |                                                                                                                                                                                    |                                                                 |            |         |    |    |       |        |                      |                             |          |
|---------|------|------------------------------------------------------------------------------------------------------------------------------------------------------------------------------------|-----------------------------------------------------------------|------------|---------|----|----|-------|--------|----------------------|-----------------------------|----------|
| Control | 6011 | tyrosine 3-gi 2780619<br>monooxy 7-gi 367639<br>genase/tr 9-gi 711537<br>yptophan 79-gi 73586<br>5-683<br>monoxy<br>genase<br>activation<br>protein,<br>epsilon<br>polypepti<br>de | 29,157.00                                                       | 99.80%     | 2       | 3  | 5  | 0.04% | 15.70% | EAAENS 2.19<br>LVAYK | 1,194.60                    |          |
| Control | 6011 | Transduc<br>in (beta)-<br>like 2                                                                                                                                                   | gi 1123623<br>03-gi 11549<br>5815                               | 49,894.00  | 100.00% | 3  | 3  | 4     | 0.03%  | 7.85%                | APIVNIGI 3.49<br>ADTGK      | 1,268.72 |
| Control | 6011 | Transduc<br>in (beta)-<br>like 2                                                                                                                                                   | gi 1123623<br>03-gi 11549<br>5815                               | 49,894.00  | 100.00% | 3  | 3  | 4     | 0.03%  | 7.85%                | LFHNTF 2.1<br>GYR           | 1,104.56 |
| Control | 6011 | Transduc<br>in (beta)-<br>like 2                                                                                                                                                   | gi 1123623<br>03-gi 11549<br>5815                               | 49,894.00  | 100.00% | 3  | 3  | 4     | 0.03%  | 7.85%                | LQQQLT 5.08<br>QAQEAL<br>K  | 1,498.82 |
| Control | 6011 | proteaso<br>me<br>activator<br>28 alpha<br>subunit                                                                                                                                 | gi 6313965<br>0-gi 739218<br>36-gi 86821<br>522-gi 9168<br>0535 | 28,675.80  | 100.00% | 3  | 3  | 3     | 0.02%  | 15.30%               | APLDIPV 2.84<br>PDPVKE<br>K | 1,517.86 |
| Control | 6011 | proteaso<br>me<br>activator<br>28 alpha<br>subunit                                                                                                                                 | gi 6313965<br>0-gi 739218<br>36-gi 86821<br>522-gi 9168<br>0535 | 28,675.80  | 100.00% | 3  | 3  | 3     | 0.02%  | 15.30%               | NAYAVL 3.18<br>YDILK        | 1,395.79 |
| Control | 6011 | proteaso<br>me<br>activator<br>28 alpha<br>subunit                                                                                                                                 | gi 6313965<br>0-gi 739218<br>36-gi 86821<br>522-gi 9168<br>0535 | 28,675.80  | 100.00% | 3  | 3  | 3     | 0.02%  | 15.30%               | QLVHEL 2.53<br>DEAEYR       | 1,501.73 |
| Control | 6011 | Hexokina<br>se 1                                                                                                                                                                   | gi 1544261<br>22-gi 33332<br>343-gi 6059<br>2784                | 102,191.60 | 100.00% | 15 | 20 | 31    | 0.24%  | 17.90%               | FKASGV 3.41<br>EGTDVV<br>K  | 1,336.71 |
| Control | 6011 | Hexokina<br>se 1                                                                                                                                                                   | gi 1544261<br>22-gi 33332<br>343-gi 6059<br>2784                | 102,191.60 | 100.00% | 15 | 20 | 31    | 0.24%  | 17.90%               | GAALITA 3.69<br>VGVR        | 1,027.63 |
| Control | 6011 | Hexokina<br>se 1                                                                                                                                                                   | gi 1544261<br>22-gi 33332<br>343-gi 6059<br>2784                | 102,191.60 | 100.00% | 15 | 20 | 31    | 0.24%  | 17.90%               | GAAMVT 3.4<br>AVAYR         | 1,125.57 |
| Control | 6011 | Hexokina<br>se 1                                                                                                                                                                   | gi 1544261<br>22-gi 33332<br>343-gi 6059<br>2784                | 102,191.60 | 100.00% | 15 | 20 | 31    | 0.24%  | 17.90%               | GDFIALD 2.91<br>LGGSSFR     | 1,454.73 |
| Control | 6011 | Hexokina<br>se 1                                                                                                                                                                   | gi 1544261<br>22-gi 33332<br>343-gi 6059<br>2784                | 102,191.60 | 100.00% | 15 | 20 | 31    | 0.24%  | 17.90%               | GKFNTS 4.07<br>DVSAIEK      | 1,395.71 |
| Control | 6011 | Hexokina<br>se 1                                                                                                                                                                   | gi 1544261<br>22-gi 33332<br>343-gi 6059<br>2784                | 102,191.60 | 100.00% | 15 | 20 | 31    | 0.24%  | 17.90%               | HIDLVE 4.09<br>GDEGR        | 1,239.60 |
| Control | 6011 | Hexokina<br>se 1                                                                                                                                                                   | gi 1544261<br>22-gi 33332<br>343-gi 6059<br>2784                | 102,191.60 | 100.00% | 15 | 20 | 31    | 0.24%  | 17.90%               | LSDETL 4.26<br>DIMNR        | 1,435.71 |
| Control | 6011 | Hexokina<br>se 1                                                                                                                                                                   | gi 1544261<br>22-gi 33332<br>343-gi 6059<br>2784                | 102,191.60 | 100.00% | 15 | 20 | 31    | 0.24%  | 17.90%               | LVDEFSL 3.36<br>NSGK        | 1,208.62 |

|         |      |                                                              |                                                  |            |         |    |    |    |       |        |                                          |          |
|---------|------|--------------------------------------------------------------|--------------------------------------------------|------------|---------|----|----|----|-------|--------|------------------------------------------|----------|
| Control | 6011 | Hexokina<br>se 1                                             | gi 1544261<br>22,gi 33332<br>343,gi 6059<br>2784 | 102,191.60 | 100.00% | 15 | 20 | 31 | 0.24% | 17.90% | QIEETLA 3.58<br>HFSLTK                   | 1,516.80 |
| Control | 6011 | Hexokina<br>se 1                                             | gi 1544261<br>22,gi 33332<br>343,gi 6059<br>2784 | 102,191.60 | 100.00% | 15 | 20 | 31 | 0.24% | 17.90% | SANLVA 4.53<br>ATLGAIL<br>SR             | 1,456.85 |
| Control | 6011 | Hexokina<br>se 1                                             | gi 1544261<br>22,gi 33332<br>343,gi 6059<br>2784 | 102,191.60 | 100.00% | 15 | 20 | 31 | 0.24% | 17.90% | SIPDGSE 4.16<br>KGDFIAL<br>DLGGSS<br>FR  | 2,268.11 |
| Control | 6011 | Hexokina<br>se 1                                             | gi 1544261<br>22,gi 33332<br>343,gi 6059<br>2784 | 102,191.60 | 100.00% | 15 | 20 | 31 | 0.24% | 17.90% | TIYDKL 3.78<br>VDEFSL<br>NSGK            | 1,828.93 |
| Control | 6011 | Hexokina<br>se 1                                             | gi 1544261<br>22,gi 33332<br>343,gi 6059<br>2784 | 102,191.60 | 100.00% | 15 | 20 | 31 | 0.24% | 17.90% | TTVGV D 2.65<br>GSLYK                    | 1,139.59 |
| Control | 6011 | Hexokina<br>se 1                                             | gi 1544261<br>22,gi 33332<br>343,gi 6059<br>2784 | 102,191.60 | 100.00% | 15 | 20 | 31 | 0.24% | 17.90% | YLSQIES 2.84<br>DR                       | 1,110.54 |
| Control | 6011 | Hexokina<br>se 1                                             | gi 1544261<br>22,gi 33332<br>343,gi 6059<br>2784 | 102,191.60 | 100.00% | 15 | 20 | 31 | 0.24% | 17.90% | YLSQIES 3.3<br>DRLALL<br>QVR             | 1,904.06 |
| Control | 6011 | RecName<br>:<br>Full=Cad<br>herin-13;<br>Flags:<br>Precursor | gi 1108327<br>87,gi 77567<br>834,gi 7836<br>9244 | 78,179.40  | 100.00% | 4  | 5  | 6  | 0.05% | 8.42%  | DIQGS LQ 3.07<br>DIFK                    | 1,263.66 |
| Control | 6011 | RecName<br>:<br>Full=Cad<br>herin-13;<br>Flags:<br>Precursor | gi 1108327<br>87,gi 77567<br>834,gi 7836<br>9244 | 78,179.40  | 100.00% | 4  | 5  | 6  | 0.05% | 8.42%  | INENTGS 3.99<br>VSVTR                    | 1,276.65 |
| Control | 6011 | RecName<br>:<br>Full=Cad<br>herin-13;<br>Flags:<br>Precursor | gi 1108327<br>87,gi 77567<br>834,gi 7836<br>9244 | 78,179.40  | 100.00% | 4  | 5  | 6  | 0.05% | 8.42%  | SIVVSPIL 3.21<br>IPENQR                  | 1,564.91 |
| Control | 6011 | RecName<br>:<br>Full=Cad<br>herin-13;<br>Flags:<br>Precursor | gi 1108327<br>87,gi 77567<br>834,gi 7836<br>9244 | 78,179.40  | 100.00% | 4  | 5  | 6  | 0.05% | 8.42%  | TLEGPV 2.86<br>PLEVIVI<br>DQNDNR<br>PIFR | 2,634.43 |
| Control | 6011 | alpha-<br>actinin 1                                          | gi 1452864<br>37,gi 77567<br>675,gi 7836<br>9242 | 102,966.00 | 100.00% | 3  | 3  | 3  | 0.02% | 5.27%  | IDQLEG 4.26<br>DHQLIQ<br>EALIFDN<br>K    | 2,339.19 |
| Control | 6011 | alpha-<br>actinin 1                                          | gi 1452864<br>37,gi 77567<br>675,gi 7836<br>9242 | 102,966.00 | 100.00% | 3  | 3  | 3  | 0.02% | 5.27%  | LLETIDQ 3.42<br>LYLEYA<br>K              | 1,711.92 |
| Control | 6011 | alpha-<br>actinin 1                                          | gi 1452864<br>37,gi 77567<br>675,gi 7836<br>9242 | 102,966.00 | 100.00% | 3  | 3  | 3  | 0.02% | 5.27%  | LSNRPAF 2.8<br>MPSEGR                    | 1,477.72 |

|         |      |                                                                                                                        |                       |           |         |   |    |    |       |        |                                        |      |          |
|---------|------|------------------------------------------------------------------------------------------------------------------------|-----------------------|-----------|---------|---|----|----|-------|--------|----------------------------------------|------|----------|
| Control | 6011 | PREDIC TED: 11<br>similar to Heterogeneous nuclear ribonucleoprotein H (hnRNP H) isoform 26                            | gi 1946686            | 49,211.80 | 99.80%  | 2 | 2  | 2  | 0.02% | 7.35%  | ATENDI<br>YNFFSPL<br>NPVR              | 2.75 | 1,996.98 |
| Control | 6011 | PREDIC TED: 11<br>similar to Heterogeneous nuclear ribonucleoprotein H (hnRNP H) isoform 26                            | gi 1946686            | 49,211.80 | 99.80%  | 2 | 2  | 2  | 0.02% | 7.35%  | HTGPNS<br>PDTAND<br>GFVR               | 5.29 | 1,684.77 |
| Control | 6011 | PREDIC TED: 7<br>similar to program med cell death 8 isoform 2                                                         | gi 7665865            | 66,854.50 | 99.90%  | 2 | 2  | 2  | 0.02% | 5.22%  | ISGLGLT<br>PEEK                        | 3.6  | 1,143.63 |
| Control | 6011 | PREDIC TED: 7<br>similar to program med cell death 8 isoform 2                                                         | gi 7665865            | 66,854.50 | 99.90%  | 2 | 2  | 2  | 0.02% | 5.22%  | KVETDH<br>IVAAVG<br>LEPNVE<br>LAK      | 3.52 | 2,232.22 |
| Control | 6011 | RecName: Full=Cadherin-2; AltName: Full=Neural cadherin; Short=N-cadherin; AltName: CD_antigen=CD325; Flags: Precursor | gi 115421,gi 19467806 | 96,830.40 | 100.00% | 8 | 11 | 17 | 0.13% | 19.40% | FAIQTDP<br>NSNDGL<br>VTVVKPI<br>DFETNR | 4.15 | 2,890.46 |

|         |      |                                                                                                                                                                        |                                          |           |         |   |    |    |       |        |                              |      |          |
|---------|------|------------------------------------------------------------------------------------------------------------------------------------------------------------------------|------------------------------------------|-----------|---------|---|----|----|-------|--------|------------------------------|------|----------|
| Control | 6011 | RecName<br>:<br>Full=Cad<br>herin-2;<br>AltName:<br>Full=Neu<br>ral<br>cadherin;<br>Short=N-<br>cadherin;<br>AltName:<br>CD_antig<br>en=CD32<br>5; Flags:<br>Precursor | gi 115421,g<br>i 19467806<br>8,gi 664894 | 96,830.40 | 100.00% | 8 | 11 | 17 | 0.13% | 19.40% | FLEAGIY<br>EVPIITD<br>SGNPPK | 3.41 | 2,273.21 |
| Control | 6011 | RecName<br>:<br>Full=Cad<br>herin-2;<br>AltName:<br>Full=Neu<br>ral<br>cadherin;<br>Short=N-<br>cadherin;<br>AltName:<br>CD_antig<br>en=CD32<br>5; Flags:<br>Precursor | gi 115421,g<br>i 19467806<br>8,gi 664894 | 96,830.40 | 100.00% | 8 | 11 | 17 | 0.13% | 19.40% | MYVLTV<br>AAENQV<br>PLAK     | 2.95 | 1,762.94 |
| Control | 6011 | RecName<br>:<br>Full=Cad<br>herin-2;<br>AltName:<br>Full=Neu<br>ral<br>cadherin;<br>Short=N-<br>cadherin;<br>AltName:<br>CD_antig<br>en=CD32<br>5; Flags:<br>Precursor | gi 115421,g<br>i 19467806<br>8,gi 664894 | 96,830.40 | 100.00% | 8 | 11 | 17 | 0.13% | 19.40% | QLLIDPE<br>DDVRDN<br>ILK     | 2.16 | 1,896.01 |

|         |      |                                                                                                                                                                        |                                          |           |         |   |    |    |       |        |                                                         |      |          |
|---------|------|------------------------------------------------------------------------------------------------------------------------------------------------------------------------|------------------------------------------|-----------|---------|---|----|----|-------|--------|---------------------------------------------------------|------|----------|
| Control | 6011 | RecName<br>:<br>Full=Cad<br>herin-2;<br>AltName:<br>Full=Neu<br>ral<br>cadherin;<br>Short=N-<br>cadherin;<br>AltName:<br>CD_antig<br>en=CD32<br>5; Flags:<br>Precursor | gi 115421.g<br>i 19467806<br>8,gi 664894 | 96,830.40 | 100.00% | 8 | 11 | 17 | 0.13% | 19.40% | SAAPHP<br>GDIGDFI<br>NEGLK                              | 4.62 | 1,837.91 |
| Control | 6011 | RecName<br>:<br>Full=Cad<br>herin-2;<br>AltName:<br>Full=Neu<br>ral<br>cadherin;<br>Short=N-<br>cadherin;<br>AltName:<br>CD_antig<br>en=CD32<br>5; Flags:<br>Precursor | gi 115421.g<br>i 19467806<br>8,gi 664894 | 96,830.40 | 100.00% | 8 | 11 | 17 | 0.13% | 19.40% | YDEEGG<br>GEEDQD<br>YDLSQL<br>QQPDTV<br>EPDAIKP<br>VGIR | 5.34 | 3,905.78 |
| Control | 6011 | RecName<br>:<br>Full=Cad<br>herin-2;<br>AltName:<br>Full=Neu<br>ral<br>cadherin;<br>Short=N-<br>cadherin;<br>AltName:<br>CD_antig<br>en=CD32<br>5; Flags:<br>Precursor | gi 115421.g<br>i 19467806<br>8,gi 664894 | 96,830.40 | 100.00% | 8 | 11 | 17 | 0.13% | 19.40% | YSVTGP<br>GADQPP<br>TGIFIINP<br>ISGQLSV<br>TKPLDR       | 3.4  | 3,438.83 |







|         |      |                                                                                                                                                                                                                                                                                                                                                                                                                 |           |         |   |   |   |       |        |                                        |          |
|---------|------|-----------------------------------------------------------------------------------------------------------------------------------------------------------------------------------------------------------------------------------------------------------------------------------------------------------------------------------------------------------------------------------------------------------------|-----------|---------|---|---|---|-------|--------|----------------------------------------|----------|
| Control | 6011 | RecName gi 1099400<br>: 69,gi 11479<br>Full=Cyt 3904,gi 710<br>ochrome 42588,gi 75<br>c1, heme 765182,gi 7<br>protein, 5765193,gi <br>mitochon 82407279,g<br>drial; i 82407290,<br>AltName: gi 8363877<br>Full=Ubi 9,gi 840002<br>quinol- 89<br>cytochro<br>me-c<br>reductase<br>complex<br>cytochro<br>me c1<br>subunit;<br>Short=Cy<br>tochrome<br>c-1;<br>AltName:<br>Full=Cyt<br>ochrome<br>b-c1<br>complex | 27,269.70 | 100.00% | 5 | 6 | 8 | 0.06% | 36.50% | LSDYFP 3.97<br>KPYPNP<br>EAAR          | 1,864.92 |
| Control | 6011 | RecName gi 1099400<br>: 69,gi 11479<br>Full=Cyt 3904,gi 710<br>ochrome 42588,gi 75<br>c1, heme 765182,gi 7<br>protein, 5765193,gi <br>mitochon 82407279,g<br>drial; i 82407290,<br>AltName: gi 8363877<br>Full=Ubi 9,gi 840002<br>quinol- 89<br>cytochro<br>me-c<br>reductase<br>complex<br>cytochro<br>me c1<br>subunit;<br>Short=Cy<br>tochrome<br>c-1;<br>AltName:<br>Full=Cyt<br>ochrome<br>b-c1<br>complex | 27,269.70 | 100.00% | 5 | 6 | 8 | 0.06% | 36.50% | MGLKM 3.42<br>LLMMGL<br>LLPLVY<br>AMK  | 2,266.26 |
| Control | 6011 | mitochon gi 6155349<br>drial 7,gi 707788<br>short- 22,gi 73919<br>chain 274,gi 8363<br>enoyl- 8650<br>coenzym<br>e A<br>hydratase<br>1<br>precursor                                                                                                                                                                                                                                                             | 31,226.90 | 100.00% | 3 | 3 | 3 | 0.02% | 16.20% | AQFGQP 4.69<br>EILIGTIP<br>GAGGTQ<br>R | 2,111.12 |

|         |      |                                                                    |                                                 |           |         |   |   |   |       |        |                                                           |      |          |
|---------|------|--------------------------------------------------------------------|-------------------------------------------------|-----------|---------|---|---|---|-------|--------|-----------------------------------------------------------|------|----------|
| Control | 6011 | mitochondrial short-chain enoyl-coenzyme A hydratase 1 precursor   | gi 61553497,gi 70778822,gi 73919274,gi 83638650 | 31,226.90 | 100.00% | 3 | 3 | 3 | 0.02% | 16.20% | KLFYSTF<br>ATEDRK                                         | 3.49 | 1,605.83 |
| Control | 6011 | mitochondrial short-chain enoyl-coenzyme A hydratase 1 precursor   | gi 61553497,gi 70778822,gi 73919274,gi 83638650 | 31,226.90 | 100.00% | 3 | 3 | 3 | 0.02% | 16.20% | NSNVGLI<br>QLNRPK                                         | 4.11 | 1,452.83 |
| Control | 6011 | F1-F0-ATPase                                                       | gi 162701,gi 231615,gi 28603752,gi 74268301     | 8,303.10  | 99.80%  | 2 | 2 | 6 | 0.05% | 35.20% | ELAEAQ<br>EDTILK                                          | 3.52 | 1,359.70 |
| Control | 6011 | F1-F0-ATPase                                                       | gi 162701,gi 231615,gi 28603752,gi 74268301     | 8,303.10  | 99.80%  | 2 | 2 | 6 | 0.05% | 35.20% | YSALFL<br>GMAYG<br>AK                                     | 3.13 | 1,407.70 |
| Control | 6011 | PREDICTED: similar to ATP-binding cassette, sub-family B, member 7 | gi 194680502                                    | 83,040.70 | 100.00% | 5 | 6 | 8 | 0.06% | 12.20% | ADNDAG<br>NAAIDSL<br>LNYETV<br>K                          | 4.24 | 2,094.00 |
| Control | 6011 | PREDICTED: similar to ATP-binding cassette, sub-family B, member 7 | gi 194680502                                    | 83,040.70 | 100.00% | 5 | 6 | 8 | 0.06% | 12.20% | AVGVVP<br>QDAVLF<br>HNTIYY<br>NLLYGNI<br>SASPEEV<br>YAVAK | 4.83 | 4,025.07 |
| Control | 6011 | PREDICTED: similar to ATP-binding cassette, sub-family B, member 7 | gi 194680502                                    | 83,040.70 | 100.00% | 5 | 6 | 8 | 0.06% | 12.20% | LAGLHD<br>AILR                                            | 2.09 | 1,078.64 |

|         |      |                                                                     |                                      |           |         |    |    |    |       |        |                                                |      |          |
|---------|------|---------------------------------------------------------------------|--------------------------------------|-----------|---------|----|----|----|-------|--------|------------------------------------------------|------|----------|
| Control | 6011 | PREDIC TED: similar to ATP-binding cassette, sub-family B, member 7 | gi 194680502                         | 83,040.70 | 100.00% | 5  | 6  | 8  | 0.06% | 12.20% | QALIDM NTLFLLK                                 | 3.31 | 1,636.90 |
| Control | 6011 | PREDIC TED: similar to ATP-binding cassette, sub-family B, member 7 | gi 194680502                         | 83,040.70 | 100.00% | 5  | 6  | 8  | 0.06% | 12.20% | YFNNE YEAQR                                    | 2.98 | 1,447.62 |
| Control | 6011 | P4HB protein                                                        | gi 148878430,gi 152941196            | 57,187.70 | 100.00% | 11 | 14 | 14 | 0.11% | 34.30% | FDEGRN NFEGEVTK                                | 3.18 | 1,641.75 |
| Control | 6011 | P4HB protein                                                        | gi 148878430,gi 152941196            | 57,187.70 | 100.00% | 11 | 14 | 14 | 0.11% | 34.30% | FLESGG QDGAGD DDDLED LEEAEEP DLEEDD DQKAVK DEL | 4.5  | 4,394.84 |
| Control | 6011 | P4HB protein                                                        | gi 148878430,gi 152941196            | 57,187.70 | 100.00% | 11 | 14 | 14 | 0.11% | 34.30% | GNFDEA LAAHK                                   | 2.8  | 1,172.57 |
| Control | 6011 | P4HB protein                                                        | gi 148878430,gi 152941196            | 57,187.70 | 100.00% | 11 | 14 | 14 | 0.11% | 34.30% | HNQLPL VIEFTEQ TAPK                            | 3.14 | 1,965.04 |
| Control | 6011 | P4HB protein                                                        | gi 148878430,gi 152941196            | 57,187.70 | 100.00% | 11 | 14 | 14 | 0.11% | 34.30% | ILEFFGLK                                       | 2.01 | 966.566  |
| Control | 6011 | P4HB protein                                                        | gi 148878430,gi 152941196            | 57,187.70 | 100.00% | 11 | 14 | 14 | 0.11% | 34.30% | NFEEVA FDEKK                                   | 3.5  | 1,355.65 |
| Control | 6011 | P4HB protein                                                        | gi 148878430,gi 152941196            | 57,187.70 | 100.00% | 11 | 14 | 14 | 0.11% | 34.30% | QFLLA EAIDDIP FGITSNS DVFSK                    | 4.77 | 2,698.36 |
| Control | 6011 | P4HB protein                                                        | gi 148878430,gi 152941196            | 57,187.70 | 100.00% | 11 | 14 | 14 | 0.11% | 34.30% | THILLFLPK                                      | 2.35 | 1,081.68 |
| Control | 6011 | P4HB protein                                                        | gi 148878430,gi 152941196            | 57,187.70 | 100.00% | 11 | 14 | 14 | 0.11% | 34.30% | VDATEE SDLAQQ YGVR                             | 3.54 | 1,780.83 |
| Control | 6011 | P4HB protein                                                        | gi 148878430,gi 152941196            | 57,187.70 | 100.00% | 11 | 14 | 14 | 0.11% | 34.30% | YKPESD ELTAEK                                  | 4    | 1,409.68 |
| Control | 6011 | P4HB protein                                                        | gi 148878430,gi 152941196            | 57,187.70 | 100.00% | 11 | 14 | 14 | 0.11% | 34.30% | YQLDKD GVVLFK                                  | 2.55 | 1,424.78 |
| Control | 6011 | RecName : Full=Ras-related protein Rab-11B                          | gi 108860922,gi 75773827,gi 78369332 | 24,471.00 | 100.00% | 5  | 6  | 9  | 0.07% | 29.40% | GAVGAL LVYDIAK                                 | 3.8  | 1,289.75 |
| Control | 6011 | RecName : Full=Ras-related protein Rab-11B                          | gi 108860922,gi 75773827,gi 78369332 | 24,471.00 | 100.00% | 5  | 6  | 9  | 0.07% | 29.40% | HLTYEN VER                                     | 2.26 | 1,160.57 |

|         |      |                                                                             |                                                                  |           |         |   |   |    |       |        |                                        |          |
|---------|------|-----------------------------------------------------------------------------|------------------------------------------------------------------|-----------|---------|---|---|----|-------|--------|----------------------------------------|----------|
| Control | 6011 | RecName<br>:<br>Full=Ras-<br>related<br>protein<br>Rab-11B                  | gi 1088609<br>22,gi 75773<br>827,gi 7836<br>9332                 | 24,471.00 | 100.00% | 5 | 6 | 9  | 0.07% | 29.40% | NNLSFIE 4.65<br>TSALDS<br>TNVEEA<br>FK | 2,329.12 |
| Control | 6011 | RecName<br>:<br>Full=Ras-<br>related<br>protein<br>Rab-11B                  | gi 1088609<br>22,gi 75773<br>827,gi 7836<br>9332                 | 24,471.00 | 100.00% | 5 | 6 | 9  | 0.07% | 29.40% | STIGVEF 2.78<br>ATR                    | 1,080.57 |
| Control | 6011 | RecName<br>:<br>Full=Ras-<br>related<br>protein<br>Rab-11B                  | gi 1088609<br>22,gi 75773<br>827,gi 7836<br>9332                 | 24,471.00 | 100.00% | 5 | 6 | 9  | 0.07% | 29.40% | VVLIGDS 2.38<br>GVGK                   | 1,043.61 |
| Control | 6011 | SEPT11<br>protein                                                           | gi 1260108<br>11,gi 12672<br>3403,gi 162<br>416046               | 48,974.60 | 99.80%  | 2 | 2 | 2  | 0.02% | 5.41%  | FESDPAT 1.69<br>HNEPGV<br>R            | 1,555.71 |
| Control | 6011 | SEPT11<br>protein                                                           | gi 1260108<br>11,gi 12672<br>3403,gi 162<br>416046               | 48,974.60 | 99.80%  | 2 | 2 | 2  | 0.02% | 5.41%  | VNIPIIA 2.12<br>K                      | 980.6504 |
| Control | 6011 | translocas<br>e of inner<br>mitochon<br>drial<br>membran<br>e 50<br>homolog | gi 1106656<br>40,gi 74268<br>127,gi 7804<br>2512,gi 833<br>05921 | 40,747.80 | 100.00% | 6 | 9 | 10 | 0.08% | 18.60% | IPDEFDN 4.65<br>DPILVQQ<br>LR          | 1,911.98 |
| Control | 6011 | translocas<br>e of inner<br>mitochon<br>drial<br>membran<br>e 50<br>homolog | gi 1106656<br>40,gi 74268<br>127,gi 7804<br>2512,gi 833<br>05921 | 40,747.80 | 100.00% | 6 | 9 | 10 | 0.08% | 18.60% | QNLFFSS 2.63<br>LTSR                   | 1,299.67 |
| Control | 6011 | translocas<br>e of inner<br>mitochon<br>drial<br>membran<br>e 50<br>homolog | gi 1106656<br>40,gi 74268<br>127,gi 7804<br>2512,gi 833<br>05921 | 40,747.80 | 100.00% | 6 | 9 | 10 | 0.08% | 18.60% | TIALNG 3.22<br>VEDVR                   | 1,186.64 |
| Control | 6011 | translocas<br>e of inner<br>mitochon<br>drial<br>membran<br>e 50<br>homolog | gi 1106656<br>40,gi 74268<br>127,gi 7804<br>2512,gi 833<br>05921 | 40,747.80 | 100.00% | 6 | 9 | 10 | 0.08% | 18.60% | TVLEHY 3.34<br>ALEEDP<br>LEAFK         | 2,004.00 |
| Control | 6011 | translocas<br>e of inner<br>mitochon<br>drial<br>membran<br>e 50<br>homolog | gi 1106656<br>40,gi 74268<br>127,gi 7804<br>2512,gi 833<br>05921 | 40,747.80 | 100.00% | 6 | 9 | 10 | 0.08% | 18.60% | TVLEHY 5.16<br>ALEEDP<br>LEAFKQ<br>R   | 2,288.16 |

|         |      |                                                                                                     |                                                                  |            |         |   |    |    |       |        |                                        |      |          |
|---------|------|-----------------------------------------------------------------------------------------------------|------------------------------------------------------------------|------------|---------|---|----|----|-------|--------|----------------------------------------|------|----------|
| Control | 6011 | translocas<br>e of inner<br>mitochon<br>drial<br>membran<br>e 50<br>homolog                         | gi 1106656<br>40,gi 74268<br>127,gi 7804<br>2512,gi 833<br>05921 | 40,747.80  | 100.00% | 6 | 9  | 10 | 0.08% | 18.60% | VLLDLS<br>AFLK                         | 3.04 | 1,118.68 |
| Control | 6011 | PREDIC<br>TED:<br>ATP-<br>binding<br>cassette,<br>sub-<br>family B<br>(MDR/T<br>AP),<br>member<br>1 | gi 1946853<br>01                                                 | 144,522.00 | 100.00% | 4 | 4  | 4  | 0.03% | 5.40%  | GNELEL<br>ENTPGE<br>SLSK               | 5.37 | 1,716.83 |
| Control | 6011 | PREDIC<br>TED:<br>ATP-<br>binding<br>cassette,<br>sub-<br>family B<br>(MDR/T<br>AP),<br>member<br>1 | gi 1946853<br>01                                                 | 144,522.00 | 100.00% | 4 | 4  | 4  | 0.03% | 5.40%  | ILLLDEA<br>TSALDT<br>ESEAVV<br>QAALDK  | 4.96 | 2,615.37 |
| Control | 6011 | PREDIC<br>TED:<br>ATP-<br>binding<br>cassette,<br>sub-<br>family B<br>(MDR/T<br>AP),<br>member<br>1 | gi 1946853<br>01                                                 | 144,522.00 | 100.00% | 4 | 4  | 4  | 0.03% | 5.40%  | LYDPTE<br>GMVSID<br>GQDIR              | 3.63 | 1,924.90 |
| Control | 6011 | PREDIC<br>TED:<br>ATP-<br>binding<br>cassette,<br>sub-<br>family B<br>(MDR/T<br>AP),<br>member<br>1 | gi 1946853<br>01                                                 | 144,522.00 | 100.00% | 4 | 4  | 4  | 0.03% | 5.40%  | YGREDV<br>TMDEIQ<br>K                  | 3.76 | 1,599.73 |
| Control | 6011 | CSE1L<br>protein                                                                                    | gi 1461868<br>77,gi 16444<br>8620,gi 193<br>806599               | 110,362.80 | 99.80%  | 2 | 2  | 3  | 0.02% | 4.84%  | FLESVEG<br>NQNYPL<br>LLLTLLE<br>K      | 4.58 | 2,433.33 |
| Control | 6011 | CSE1L<br>protein                                                                                    | gi 1461868<br>77,gi 16444<br>8620,gi 193<br>806599               | 110,362.80 | 99.80%  | 2 | 2  | 3  | 0.02% | 4.84%  | GPNSAT<br>LFTAAEI<br>APFVEIL<br>LTNLFK | 2.71 | 2,777.51 |
| Control | 6011 | AFG3<br>ATPase<br>family<br>gene 3-<br>like 2                                                       | gi 1140511<br>25,gi 11857<br>2819,gi 868<br>20707                | 89,372.80  | 100.00% | 9 | 12 | 12 | 0.09% | 14.50% | EVLDKN<br>DMVELL<br>GPRPFAE<br>K       | 3.66 | 2,316.19 |
| Control | 6011 | AFG3<br>ATPase<br>family<br>gene 3-<br>like 2                                                       | gi 1140511<br>25,gi 11857<br>2819,gi 868<br>20707                | 89,372.80  | 100.00% | 9 | 12 | 12 | 0.09% | 14.50% | GLGYAQ<br>YLPR                         | 2.77 | 1,137.61 |

|         |      |                                                                                                               |                                                                                                                                                                           |           |         |   |    |    |       |        |                                |          |
|---------|------|---------------------------------------------------------------------------------------------------------------|---------------------------------------------------------------------------------------------------------------------------------------------------------------------------|-----------|---------|---|----|----|-------|--------|--------------------------------|----------|
| Control | 6011 | AFG3<br>ATPase<br>family<br>gene 3-<br>like 2                                                                 | gi 1140511<br>25,gi 11857<br>2819,gi 868<br>20707                                                                                                                         | 89,372.80 | 100.00% | 9 | 12 | 12 | 0.09% | 14.50% | GMGGLF 3.37<br>SVGETT<br>AK    | 1,370.66 |
| Control | 6011 | AFG3<br>ATPase<br>family<br>gene 3-<br>like 2                                                                 | gi 1140511<br>25,gi 11857<br>2819,gi 868<br>20707                                                                                                                         | 89,372.80 | 100.00% | 9 | 12 | 12 | 0.09% | 14.50% | GVVDRL 3.09<br>EVDNKR          | 1,383.81 |
| Control | 6011 | AFG3<br>ATPase<br>family<br>gene 3-<br>like 2                                                                 | gi 1140511<br>25,gi 11857<br>2819,gi 868<br>20707                                                                                                                         | 89,372.80 | 100.00% | 9 | 12 | 12 | 0.09% | 14.50% | ILINDAY 1.96<br>KR             | 1,105.64 |
| Control | 6011 | AFG3<br>ATPase<br>family<br>gene 3-<br>like 2                                                                 | gi 1140511<br>25,gi 11857<br>2819,gi 868<br>20707                                                                                                                         | 89,372.80 | 100.00% | 9 | 12 | 12 | 0.09% | 14.50% | NLETLQ 3.65<br>QELGIEG<br>ENR  | 1,842.92 |
| Control | 6011 | AFG3<br>ATPase<br>family<br>gene 3-<br>like 2                                                                 | gi 1140511<br>25,gi 11857<br>2819,gi 868<br>20707                                                                                                                         | 89,372.80 | 100.00% | 9 | 12 | 12 | 0.09% | 14.50% | VGQISFD 3.38<br>LPR            | 1,131.62 |
| Control | 6011 | AFG3<br>ATPase<br>family<br>gene 3-<br>like 2                                                                 | gi 1140511<br>25,gi 11857<br>2819,gi 868<br>20707                                                                                                                         | 89,372.80 | 100.00% | 9 | 12 | 12 | 0.09% | 14.50% | VSEEIFF 2.76<br>GR             | 1,083.55 |
| Control | 6011 | AFG3<br>ATPase<br>family<br>gene 3-<br>like 2                                                                 | gi 1140511<br>25,gi 11857<br>2819,gi 868<br>20707                                                                                                                         | 89,372.80 | 100.00% | 9 | 12 | 12 | 0.09% | 14.50% | VTQSAY 2.98<br>AQIVQF<br>GMNEK | 1,929.94 |
| Control | 6011 | ATP<br>synthase,<br>H+<br>transporti<br>ng,<br>mitochon<br>drial F1<br>complex,<br>gamma<br>polypepti<br>de 1 | gi 1154954<br>11,gi 15842<br>8988,gi 158<br>428995,gi 1<br>58429005,g<br>i 15842901<br>2,gi 158429<br>019,gi 1584<br>29026,gi 15<br>8431072,gi <br>543874,gi 7<br>4268047 | 30,124.50 | 100.00% | 8 | 12 | 36 | 0.28% | 49.30% | HLIIGVS 2.77<br>SDR            | 1,096.61 |
| Control | 6011 | ATP<br>synthase,<br>H+<br>transporti<br>ng,<br>mitochon<br>drial F1<br>complex,<br>gamma<br>polypepti<br>de 1 | gi 1154954<br>11,gi 15842<br>8988,gi 158<br>428995,gi 1<br>58429005,g<br>i 15842901<br>2,gi 158429<br>019,gi 1584<br>29026,gi 15<br>8431072,gi <br>543874,gi 7<br>4268047 | 30,124.50 | 100.00% | 8 | 12 | 36 | 0.28% | 49.30% | IIGVGDK 2.91<br>IR             | 970.6046 |

|         |      |                                                                          |                                                                                                                                   |           |         |   |    |    |       |        |                                                 |      |          |
|---------|------|--------------------------------------------------------------------------|-----------------------------------------------------------------------------------------------------------------------------------|-----------|---------|---|----|----|-------|--------|-------------------------------------------------|------|----------|
| Control | 6011 | ATP synthase, H+ transport mitochondrial F1 complex, gamma polypeptide 1 | gi 115495411.gi 158428988.gi 158428995.gi 158429005.gi 158429012.gi 158429019.gi 158429026.gi 158431072.gi 15843874.gi 1584268047 | 30,124.50 | 100.00% | 8 | 12 | 36 | 0.28% | 49.30% | NASEMI<br>DKLTLT<br>FNR                         | 3.67 | 1,768.89 |
| Control | 6011 | ATP synthase, H+ transport mitochondrial F1 complex, gamma polypeptide 1 | gi 115495411.gi 158428988.gi 158428995.gi 158429005.gi 158429012.gi 158429019.gi 158429026.gi 158431072.gi 15843874.gi 1584268047 | 30,124.50 | 100.00% | 8 | 12 | 36 | 0.28% | 49.30% | NYQEYS<br>LANIYY<br>SLK                         | 3.89 | 1,981.99 |
| Control | 6011 | ATP synthase, H+ transport mitochondrial F1 complex, gamma polypeptide 1 | gi 115495411.gi 158428988.gi 158428995.gi 158429005.gi 158429012.gi 158429019.gi 158429026.gi 158431072.gi 15843874.gi 1584268047 | 30,124.50 | 100.00% | 8 | 12 | 36 | 0.28% | 49.30% | RPPTFG<br>DASVIAL<br>ELLNSG<br>YEFDEG<br>SIIFNR | 4.82 | 3,427.72 |
| Control | 6011 | ATP synthase, H+ transport mitochondrial F1 complex, gamma polypeptide 1 | gi 115495411.gi 158428988.gi 158428995.gi 158429005.gi 158429012.gi 158429019.gi 158429026.gi 158431072.gi 15843874.gi 1584268047 | 30,124.50 | 100.00% | 8 | 12 | 36 | 0.28% | 49.30% | TEEKPIF<br>SLDTISS<br>AESMSIY<br>DDIDAD<br>VLR  | 6.13 | 3,376.60 |
| Control | 6011 | ATP synthase, H+ transport mitochondrial F1 complex, gamma polypeptide 1 | gi 115495411.gi 158428988.gi 158428995.gi 158429005.gi 158429012.gi 158429019.gi 158429026.gi 158431072.gi 15843874.gi 1584268047 | 30,124.50 | 100.00% | 8 | 12 | 36 | 0.28% | 49.30% | THSDQF<br>LVTFK                                 | 3.19 | 1,322.67 |

|         |      |                                                                                                     |                                                                                                          |           |         |   |    |    |       |        |                           |      |          |
|---------|------|-----------------------------------------------------------------------------------------------------|----------------------------------------------------------------------------------------------------------|-----------|---------|---|----|----|-------|--------|---------------------------|------|----------|
| Control | 6011 | ATP synthase, H+ transporting, mitochondrial F1 complex, gamma polypeptide 1                        | gi 115495411.gi 158428988.gi 158429005.gi 158429012.gi 158429019.gi 158429026.gi 158431072.gi 1584268047 | 30,124.50 | 100.00% | 8 | 12 | 36 | 0.28% | 49.30% | VYGVGS<br>LALYEK          | 4.38 | 1,298.70 |
| Control | 6011 | transgelin 2                                                                                        | gi 59858295.gi 61888874.gi 73919851                                                                      | 22,408.90 | 100.00% | 3 | 3  | 3  | 0.02% | 18.60% | QMEQIS<br>QFLQAA<br>ER    | 3.37 | 1,694.82 |
| Control | 6011 | transgelin 2                                                                                        | gi 59858295.gi 61888874.gi 73919851                                                                      | 22,408.90 | 100.00% | 3 | 3  | 3  | 0.02% | 18.60% | TLMNLG<br>GLAVAR          | 3.43 | 1,231.68 |
| Control | 6011 | transgelin 2                                                                                        | gi 59858295.gi 61888874.gi 73919851                                                                      | 22,408.90 | 100.00% | 3 | 3  | 3  | 0.02% | 18.60% | YFSDNQ<br>LQEGK           | 2.58 | 1,328.61 |
| Control | 6011 | PREDICTED: similar to Heparan sulfate 2-O-sulfotransferase 1 (2-O-sulfotransferase) (2OST), partial | gi 119889909                                                                                             | 37,063.70 | 99.80%  | 2 | 2  | 4  | 0.03% | 9.24%  | EKDGDL<br>YILAQNF<br>FYEK | 3.75 | 2,093.02 |
| Control | 6011 | PREDICTED: similar to Heparan sulfate 2-O-sulfotransferase 1 (2-O-sulfotransferase) (2OST), partial | gi 119889909                                                                                             | 37,063.70 | 99.80%  | 2 | 2  | 4  | 0.03% | 9.24%  | NNPVMS<br>LQDQVR          | 3.73 | 1,416.69 |
| Control | 6011 | PREDICTED: similar to transferrin receptor                                                          | gi 119879652                                                                                             | 85,420.40 | 100.00% | 7 | 7  | 11 | 0.09% | 10.50% | FVKEMN<br>LFR             | 2.04 | 1,199.62 |
| Control | 6011 | PREDICTED: similar to transferrin receptor                                                          | gi 119879652                                                                                             | 85,420.40 | 100.00% | 7 | 7  | 11 | 0.09% | 10.50% | IMKVEY<br>HLLSPY<br>VSPR  | 2.35 | 1,948.04 |
| Control | 6011 | PREDICTED: similar to transferrin receptor                                                          | gi 119879652                                                                                             | 85,420.40 | 100.00% | 7 | 7  | 11 | 0.09% | 10.50% | LAADEE<br>ENVDSN<br>MR    | 3.38 | 1,608.68 |



|         |      |                                                    |                             |           |         |   |   |    |       |        |                                                     |          |
|---------|------|----------------------------------------------------|-----------------------------|-----------|---------|---|---|----|-------|--------|-----------------------------------------------------|----------|
| Control | 6011 | PREDIC TED: similar to transferri n receptor       | gi 1198796 52               | 85,420.40 | 100.00% | 7 | 7 | 11 | 0.09% | 10.50% | SAFSNLF 4.32<br>GGEPLS<br>YTR                       | 1,745.85 |
| Control | 6011 | PREDIC TED: similar to transferri n receptor       | gi 1198796 52               | 85,420.40 | 100.00% | 7 | 7 | 11 | 0.09% | 10.50% | SSVGTSL 2.47<br>LLTLAR                              | 1,317.77 |
| Control | 6011 | PREDIC TED: similar to transferri n receptor       | gi 1198796 52               | 85,420.40 | 100.00% | 7 | 7 | 11 | 0.09% | 10.50% | VEYHLL 3.09<br>SPYVSPR                              | 1,559.82 |
| Control | 6011 | PREDIC TED: similar to transferri n receptor       | gi 1198796 52               | 85,420.40 | 100.00% | 7 | 7 | 11 | 0.09% | 10.50% | VSASPLL 4.03<br>YSLIEK                              | 1,419.81 |
| Control | 6011 | Unknown (protein for IMAGE: 8481405)               | gi 1515541 81               | 51,930.50 | 99.80%  | 2 | 2 | 2  | 0.02% | 6.00%  | FQLSNS 3.63<br>GPNSSL<br>K                          | 1,378.70 |
| Control | 6011 | Unknown (protein for IMAGE: 8481405)               | gi 1515541 81               | 51,930.50 | 99.80%  | 2 | 2 | 2  | 0.02% | 6.00%  | NLIAFSE 2.61<br>DGSDPY<br>VR                        | 1,682.80 |
| Control | 6011 | Leucine rich repeat containin g 8 family, member A | gi 1153047 67,gi 11600 3833 | 93,997.70 | 100.00% | 4 | 4 | 4  | 0.03% | 8.64%  | ALSETV 3.55<br>VEESDP<br>KPAFSK                     | 1,933.98 |
| Control | 6011 | Leucine rich repeat containin g 8 family, member A | gi 1153047 67,gi 11600 3833 | 93,997.70 | 100.00% | 4 | 4 | 4  | 0.03% | 8.64%  | IEAPALA 3.01<br>FLR                                 | 1,100.65 |
| Control | 6011 | Leucine rich repeat containin g 8 family, member A | gi 1153047 67,gi 11600 3833 | 93,997.70 | 100.00% | 4 | 4 | 4  | 0.03% | 8.64%  | MANLTE 2.84<br>LELIR                                | 1,318.70 |
| Control | 6011 | Leucine rich repeat containin g 8 family, member A | gi 1153047 67,gi 11600 3833 | 93,997.70 | 100.00% | 4 | 4 | 4  | 0.03% | 8.64%  | YLDLSH 3.88<br>NNLTFP<br>ADIGLLQ<br>SLQNLA<br>VTANR | 3,424.82 |

|         |      |                                                                    |                                                              |            |         |   |   |   |       |        |                                                               |          |
|---------|------|--------------------------------------------------------------------|--------------------------------------------------------------|------------|---------|---|---|---|-------|--------|---------------------------------------------------------------|----------|
| Control | 6011 | Caveolin 2                                                         | gi 157279219,gi 38322700,gi 51512145,gi 56119130,gi 66774044 | 18,142.30  | 99.80%  | 2 | 2 | 6 | 0.05% | 16.00% | ADVQLF 2.8<br>MDDDSY<br>SR                                    | 1,677.71 |
| Control | 6011 | Caveolin 2                                                         | gi 157279219,gi 38322700,gi 51512145,gi 56119130,gi 66774044 | 18,142.30  | 99.80%  | 2 | 2 | 6 | 0.05% | 16.00% | SFSSVSL 3.42<br>QLSHD                                         | 1,306.63 |
| Control | 6011 | solute carrier family 29 (nucleoside transporters), member 1       | gi 110331885,gi 73587285,gi 77735743                         | 49,866.60  | 100.00% | 3 | 3 | 3 | 0.02% | 10.10% | DIQASAS 3.54<br>PLAPSPE<br>R                                  | 1,538.78 |
| Control | 6011 | solute carrier family 29 (nucleoside transporters), member 1       | gi 110331885,gi 73587285,gi 77735743                         | 49,866.60  | 100.00% | 3 | 3 | 3 | 0.02% | 10.10% | LAFVPLL 3.51<br>LLCNVQ<br>PR                                  | 1,696.00 |
| Control | 6011 | solute carrier family 29 (nucleoside transporters), member 1       | gi 110331885,gi 73587285,gi 77735743                         | 49,866.60  | 100.00% | 3 | 3 | 3 | 0.02% | 10.10% | LEGPGE 3.62<br>QETKLD<br>LISK                                 | 1,756.93 |
| Control | 6011 | PREDICTED: similar to trinucleotide repeat containing 6B isoform 3 | gi 119893244                                                 | 182,751.00 | 99.70%  | 2 | 2 | 2 | 0.02% | 4.06%  | KTGSVG 3.44<br>SWGAAR<br>GPSGTD<br>TASGQS<br>NSGNG<br>NNGK    | 3,178.45 |
| Control | 6011 | PREDICTED: similar to trinucleotide repeat containing 6B isoform 3 | gi 119893244                                                 | 182,751.00 | 99.70%  | 2 | 2 | 2 | 0.02% | 4.06%  | YSTKQE 2.41<br>AAKAQT<br>ALHMCV<br>LGNTTIL<br>AEFATD<br>DEVSR | 3,912.91 |
| Control | 6011 | ACTN4 protein                                                      | gi 146186472,gi 148238040,gi 162416099                       | 104,913.30 | 100.00% | 3 | 3 | 3 | 0.02% | 5.16%  | KDDPVT 2.62<br>NLNNAF<br>EVAEK                                | 1,903.94 |
| Control | 6011 | ACTN4 protein                                                      | gi 146186472,gi 148238040,gi 162416099                       | 104,913.30 | 100.00% | 3 | 3 | 3 | 0.02% | 5.16%  | LSNRPAF 3.45<br>MPSEGK                                        | 1,449.72 |

|         |      |                                                                                         |                                        |            |         |   |   |   |       |        |                                     |          |
|---------|------|-----------------------------------------------------------------------------------------|----------------------------------------|------------|---------|---|---|---|-------|--------|-------------------------------------|----------|
| Control | 6011 | ACTN4 protein                                                                           | gi 146186472,gi 148238040,gi 162416099 | 104,913.30 | 100.00% | 3 | 3 | 3 | 0.02% | 5.16%  | MAPYQG 3.06<br>PDAVPG<br>ALDYK      | 1,808.85 |
| Control | 6011 | guanine nucleotide binding protein (G protein), alpha inhibiting activity polypeptide 3 | gi 146231724,gi 77736299               | 40,519.40  | 99.80%  | 2 | 2 | 3 | 0.02% | 16.90% | ISQTNYI 4.02<br>PTQQDV<br>LR        | 1,775.93 |
| Control | 6011 | guanine nucleotide binding protein (G protein), alpha inhibiting activity polypeptide 3 | gi 146231724,gi 77736299               | 40,519.40  | 99.80%  | 2 | 2 | 3 | 0.02% | 16.90% | LLLLGA 3.47<br>GESGK                | 1,057.63 |
| Control | 6011 | guanine nucleotide binding protein (G protein), alpha inhibiting activity polypeptide 3 | gi 146231724,gi 77736299               | 40,519.40  | 99.80%  | 2 | 2 | 3 | 0.02% | 16.90% | NVQFVF 2.94<br>DAVTDV<br>IHK        | 1,707.93 |
| Control | 6011 | guanine nucleotide binding protein (G protein), alpha inhibiting activity polypeptide 3 | gi 146231724,gi 77736299               | 40,519.40  | 99.80%  | 2 | 2 | 3 | 0.02% | 16.90% | SREYQL 4.4<br>NDSASY<br>YLNLDL<br>R | 2,322.06 |
| Control | 6011 | Chromosome 9 open reading frame 46 ortholog                                             | gi 74354529,gi 77735799                | 17,091.30  | 99.80%  | 2 | 2 | 4 | 0.03% | 15.60% | GMITFES 2.97<br>LEK                 | 1,170.57 |
| Control | 6011 | Chromosome 9 open reading frame 46 ortholog                                             | gi 74354529,gi 77735799                | 17,091.30  | 99.80%  | 2 | 2 | 4 | 0.03% | 15.60% | MKGEAE 3.88<br>NILETEK              | 1,507.73 |
| Control | 6011 | STAT1 protein 44                                                                        | gi 154426144                           | 86,914.50  | 100.00% | 4 | 4 | 4 | 0.03% | 6.96%  | ELSAVTF 2.95<br>PDIIR               | 1,360.75 |
| Control | 6011 | STAT1 protein 44                                                                        | gi 154426144                           | 86,914.50  | 100.00% | 4 | 4 | 4 | 0.03% | 6.96%  | FHDLLS 3.62<br>QLDDQY<br>SR         | 1,736.82 |
| Control | 6011 | STAT1 protein 44                                                                        | gi 154426144                           | 86,914.50  | 100.00% | 4 | 4 | 4 | 0.03% | 6.96%  | GLNVDQ 3.5<br>LNMLGE<br>K           | 1,446.73 |

|         |      |                                                |                                                             |           |         |   |   |    |       |        |                                            |          |
|---------|------|------------------------------------------------|-------------------------------------------------------------|-----------|---------|---|---|----|-------|--------|--------------------------------------------|----------|
| Control | 6011 | STAT1 protein                                  | gi 154426144                                                | 86,914.50 | 100.00% | 4 | 4 | 4  | 0.03% | 6.96%  | VMAAEN 4.07<br>IPENPLK                     | 1,441.74 |
| Control | 6011 | Amyloid beta (A4) precursor protein            | gi 115305312,gi 116003813                                   | 78,577.00 | 99.80%  | 2 | 2 | 2  | 0.02% | 5.32%  | LALENYI 3.11<br>TALQAV<br>PPRPRH<br>VFNMLK | 2,907.60 |
| Control | 6011 | Amyloid beta (A4) precursor protein            | gi 115305312,gi 116003813                                   | 78,577.00 | 99.80%  | 2 | 2 | 2  | 0.02% | 5.32%  | VESLEQ 3.05<br>EAANER                      | 1,374.65 |
| Control | 6011 | non-classical MHC class I antigen              | gi 157785629,gi 83638606                                    | 38,884.20 | 100.00% | 3 | 4 | 19 | 0.15% | 15.20% | DYLALN 3.86<br>EDLR                        | 1,221.61 |
| Control | 6011 | non-classical MHC class I antigen              | gi 157785629,gi 83638606                                    | 38,884.20 | 100.00% | 3 | 4 | 19 | 0.15% | 15.20% | FITVGYV 3.48<br>DDTQFV<br>R                | 1,659.84 |
| Control | 6011 | non-classical MHC class I antigen              | gi 157785629,gi 83638606                                    | 38,884.20 | 100.00% | 3 | 4 | 19 | 0.15% | 15.20% | VQHEGL 4.25<br>QEPLTLR                     | 1,519.82 |
| Control | 6011 | non-classical MHC class I antigen              | gi 157785629,gi 83638606                                    | 38,884.20 | 100.00% | 3 | 4 | 19 | 0.15% | 15.20% | YFLTAV 2.71<br>SR                          | 956.5199 |
| Control | 6011 | non-classical MHC class I antigen              | gi 157785629,gi 83638606                                    | 38,884.20 | 100.00% | 3 | 4 | 19 | 0.15% | 15.20% | YFLTAV 3.14<br>SRPGLG<br>EPR               | 1,662.90 |
| Control | 6011 | claudin 1                                      | gi 47827197,gi 49258204,gi 61555400,gi 68052146,gi 73587015 | 22,847.70 | 99.80%  | 2 | 2 | 3  | 0.02% | 14.70% | IVQEFYD 2.82<br>PMPVNV<br>AR               | 1,795.87 |
| Control | 6011 | claudin 1                                      | gi 47827197,gi 49258204,gi 61555400,gi 68052146,gi 73587015 | 22,847.70 | 99.80%  | 2 | 2 | 3  | 0.02% | 14.70% | VFDSLL 2.75<br>NLNSTL<br>QATR              | 1,791.96 |
| Control | 6011 | v-ral simian leukemia viral oncogene homolog B | gi 146231722,gi 147900776,gi 148878477                      | 23,421.00 | 99.80%  | 2 | 3 | 3  | 0.02% | 13.60% | AEEDKIP 3.71<br>LLVVG<br>N<br>K            | 1,524.86 |
| Control | 6011 | v-ral simian leukemia viral oncogene homolog B | gi 146231722,gi 147900776,gi 148878477                      | 23,421.00 | 99.80%  | 2 | 3 | 3  | 0.02% | 13.60% | ANVDKV 3.98<br>FFDLMR                      | 1,470.74 |

|         |      |                                                                                                                                                                                                                                   |                                                               |           |         |   |   |   |       |        |                            |      |          |
|---------|------|-----------------------------------------------------------------------------------------------------------------------------------------------------------------------------------------------------------------------------------|---------------------------------------------------------------|-----------|---------|---|---|---|-------|--------|----------------------------|------|----------|
| Control | 6011 | v-ral<br>simian<br>leukemia<br>viral<br>oncogene<br>homolog<br>B                                                                                                                                                                  | gi 1462317<br>22,gi 14790<br>0776,gi 148<br>878477            | 23,421.00 | 99.80%  | 2 | 3 | 3 | 0.02% | 13.60% | VFFDLM<br>R                | 2.39 | 943.4707 |
| Control | 6011 | v-ral<br>simian<br>leukemia<br>viral<br>oncogene<br>homolog<br>B                                                                                                                                                                  | gi 1462317<br>22,gi 14790<br>0776,gi 148<br>878477            | 23,421.00 | 99.80%  | 2 | 3 | 3 | 0.02% | 13.60% | VKAEED<br>KIPLLVV<br>GNK   | 4.25 | 1,752.03 |
| Control | 6011 | RecName<br>:<br>Full=Gua<br>nine<br>nucleotid<br>e-binding<br>protein<br>subunit<br>alpha-11;<br>Short=G-<br>protein<br>subunit<br>alpha-11;<br>Short=G<br>alpha-11;<br>AltName:<br>Full=G-<br>protein<br>subunit<br>GL2<br>alpha | gi 1169852,<br>gi 1337774<br>82,gi 21756<br>8,gi 278057<br>95 | 41,360.90 | 100.00% | 4 | 4 | 4 | 0.03% | 15.30% | IATSGYL<br>PTQQDV<br>LR    | 4.13 | 1,661.89 |
| Control | 6011 | RecName<br>:<br>Full=Gua<br>nine<br>nucleotid<br>e-binding<br>protein<br>subunit<br>alpha-11;<br>Short=G-<br>protein<br>subunit<br>alpha-11;<br>Short=G<br>alpha-11;<br>AltName:<br>Full=G-<br>protein<br>subunit<br>GL2<br>alpha | gi 1169852,<br>gi 1337774<br>82,gi 21756<br>8,gi 278057<br>95 | 41,360.90 | 100.00% | 4 | 4 | 4 | 0.03% | 15.30% | ILHSHLV<br>DYFPEF<br>DGPQR | 3.96 | 2,170.07 |

|         |      |                                                                                                                                                                                                                                   |                                                                         |         |   |   |   |       |        |                                     |      |          |
|---------|------|-----------------------------------------------------------------------------------------------------------------------------------------------------------------------------------------------------------------------------------|-------------------------------------------------------------------------|---------|---|---|---|-------|--------|-------------------------------------|------|----------|
| Control | 6011 | RecName<br>:<br>Full=Gua<br>nine<br>nucleotid<br>e-binding<br>protein<br>subunit<br>alpha-11;<br>Short=G-<br>protein<br>subunit<br>alpha-11;<br>Short=G<br>alpha-11;<br>AltName:<br>Full=G-<br>protein<br>subunit<br>GL2<br>alpha | gi 1169852, 41,360.90<br>gi 1337774<br>82,gi 21756<br>8,gi 278057<br>95 | 100.00% | 4 | 4 | 4 | 0.03% | 15.30% | VPTTGII<br>EYFPDLE<br>NIIFR         | 2.99 | 2,237.19 |
| Control | 6011 | RecName<br>:<br>Full=Gua<br>nine<br>nucleotid<br>e-binding<br>protein<br>subunit<br>alpha-11;<br>Short=G-<br>protein<br>subunit<br>alpha-11;<br>Short=G<br>alpha-11;<br>AltName:<br>Full=G-<br>protein<br>subunit<br>GL2<br>alpha | gi 1169852, 41,360.90<br>gi 1337774<br>82,gi 21756<br>8,gi 278057<br>95 | 100.00% | 4 | 4 | 4 | 0.03% | 15.30% | VRVPTT<br>GIIEYFP<br>DLENIIF<br>R   | 5.79 | 2,492.36 |
| Control | 6011 | family<br>with<br>sequence<br>similarity<br>82,<br>member<br>C                                                                                                                                                                    | gi 1154968 51,888.40<br>78,gi 12214<br>3776,gi 945<br>74211             | 99.80%  | 2 | 3 | 3 | 0.02% | 8.07%  | SSLQGL<br>AGQIVG<br>EVR             | 4.42 | 1,513.83 |
| Control | 6011 | family<br>with<br>sequence<br>similarity<br>82,<br>member<br>C                                                                                                                                                                    | gi 1154968 51,888.40<br>78,gi 12214<br>3776,gi 945<br>74211             | 99.80%  | 2 | 3 | 3 | 0.02% | 8.07%  | TATALS<br>ESPLGAT<br>VQDALS<br>SFLK | 3.99 | 2,307.21 |

|         |      |                                                            |                                                                 |           |         |    |    |    |       |        |                                        |          |
|---------|------|------------------------------------------------------------|-----------------------------------------------------------------|-----------|---------|----|----|----|-------|--------|----------------------------------------|----------|
| Control | 6011 | mitochondrial NADH:ubiquinone oxidoreductase B16.6 subunit | gi 15864616,gi 20139062,gi 28603804,gi 74268330                 | 16,655.90 | 100.00% | 4  | 4  | 7  | 0.05% | 26.40% | IALMPLL 3.62<br>QAEK                   | 1,242.71 |
| Control | 6011 | mitochondrial NADH:ubiquinone oxidoreductase B16.6 subunit | gi 15864616,gi 20139062,gi 28603804,gi 74268330                 | 16,655.90 | 100.00% | 4  | 4  | 7  | 0.05% | 26.40% | LQIEDFE 2.91<br>AR                     | 1,120.56 |
| Control | 6011 | mitochondrial NADH:ubiquinone oxidoreductase B16.6 subunit | gi 15864616,gi 20139062,gi 28603804,gi 74268330                 | 16,655.90 | 100.00% | 4  | 4  | 7  | 0.05% | 26.40% | VKQDMP 3.27<br>PVGGYG<br>PIDYK         | 1,879.93 |
| Control | 6011 | mitochondrial NADH:ubiquinone oxidoreductase B16.6 subunit | gi 15864616,gi 20139062,gi 28603804,gi 74268330                 | 16,655.90 | 100.00% | 4  | 4  | 7  | 0.05% | 26.40% | VKQDMP 5.96<br>PVGGYG<br>PIDYKR        | 2,036.03 |
| Control | 6011 | basigin                                                    | gi 115496127,gi 120419551,gi 154425710,gi 156713141,gi 73587049 | 29,754.80 | 100.00% | 4  | 5  | 6  | 0.05% | 17.70% | FFVVSSE 3.05<br>SR                     | 1,057.53 |
| Control | 6011 | basigin                                                    | gi 115496127,gi 120419551,gi 154425710,gi 156713141,gi 73587049 | 29,754.80 | 100.00% | 4  | 5  | 6  | 0.05% | 17.70% | RKPDEV 5.18<br>LDDEDI<br>GSAPLK        | 1,997.02 |
| Control | 6011 | basigin                                                    | gi 115496127,gi 120419551,gi 154425710,gi 156713141,gi 73587049 | 29,754.80 | 100.00% | 4  | 5  | 6  | 0.05% | 17.70% | VLKEDA 2.68<br>LPDLK                   | 1,240.72 |
| Control | 6011 | basigin                                                    | gi 115496127,gi 120419551,gi 154425710,gi 156713141,gi 73587049 | 29,754.80 | 100.00% | 4  | 5  | 6  | 0.05% | 17.70% | VLKEDA 4.15<br>LPDLKT<br>EYEVDS<br>EDR | 2,464.21 |
| Control | 6011 | Tubulin, beta 2C                                           | gi 75773583,gi 77736271                                         | 49,812.70 | 100.00% | 12 | 14 | 25 | 0.20% | 41.80% | ALTVPE 2.54<br>LTQQMF<br>DAK           | 1,707.86 |
| Control | 6011 | Tubulin, beta 2C                                           | gi 75773583,gi 77736271                                         | 49,812.70 | 100.00% | 12 | 14 | 25 | 0.20% | 41.80% | AVLVDL 3.58<br>EPGTMD<br>SVR           | 1,617.82 |

|         |      |                                                    |                                                  |           |         |    |    |    |       |        |                                                                 |      |          |
|---------|------|----------------------------------------------------|--------------------------------------------------|-----------|---------|----|----|----|-------|--------|-----------------------------------------------------------------|------|----------|
| Control | 6011 | Tubulin, beta 2C                                   | gi 7577358<br>3,gi 777362<br>71                  | 49,812.70 | 100.00% | 12 | 14 | 25 | 0.20% | 41.80% | EAESCD<br>CLQGFQ<br>LTHSLG<br>GGTGSG<br>MGTLIS<br>K             | 3.41 | 3,213.49 |
| Control | 6011 | Tubulin, beta 2C                                   | gi 7577358<br>3,gi 777362<br>71                  | 49,812.70 | 100.00% | 12 | 14 | 25 | 0.20% | 41.80% | FPGQLN<br>ADLRK                                                 | 3.12 | 1,258.69 |
| Control | 6011 | Tubulin, beta 2C                                   | gi 7577358<br>3,gi 777362<br>71                  | 49,812.70 | 100.00% | 12 | 14 | 25 | 0.20% | 41.80% | GHYTEG<br>AELVDS<br>VLDVVR                                      | 3.66 | 1,958.98 |
| Control | 6011 | Tubulin, beta 2C                                   | gi 7577358<br>3,gi 777362<br>71                  | 49,812.70 | 100.00% | 12 | 14 | 25 | 0.20% | 41.80% | GHYTEG<br>AELVDS<br>VLDVVR<br>K                                 | 3.32 | 2,087.08 |
| Control | 6011 | Tubulin, beta 2C                                   | gi 7577358<br>3,gi 777362<br>71                  | 49,812.70 | 100.00% | 12 | 14 | 25 | 0.20% | 41.80% | IMNTFSV<br>VPSPK                                                | 4.39 | 1,335.70 |
| Control | 6011 | Tubulin, beta 2C                                   | gi 7577358<br>3,gi 777362<br>71                  | 49,812.70 | 100.00% | 12 | 14 | 25 | 0.20% | 41.80% | ISEQFTA<br>MFR                                                  | 2.98 | 1,245.59 |
| Control | 6011 | Tubulin, beta 2C                                   | gi 7577358<br>3,gi 777362<br>71                  | 49,812.70 | 100.00% | 12 | 14 | 25 | 0.20% | 41.80% | LAVNMV<br>PFPR                                                  | 3.55 | 1,159.63 |
| Control | 6011 | Tubulin, beta 2C                                   | gi 7577358<br>3,gi 777362<br>71                  | 49,812.70 | 100.00% | 12 | 14 | 25 | 0.20% | 41.80% | LHFFMP<br>GFAPLTS<br>R                                          | 3.66 | 1,620.84 |
| Control | 6011 | Tubulin, beta 2C                                   | gi 7577358<br>3,gi 777362<br>71                  | 49,812.70 | 100.00% | 12 | 14 | 25 | 0.20% | 41.80% | VSDTVV<br>EPYNAT<br>LSVHQL<br>VENTDE<br>TYCIDNE<br>ALYDICF<br>R | 4.94 | 4,479.06 |
| Control | 6011 | Tubulin, beta 2C                                   | gi 7577358<br>3,gi 777362<br>71                  | 49,812.70 | 100.00% | 12 | 14 | 25 | 0.20% | 41.80% | YLTVA<br>VFR                                                    | 2.56 | 1,039.59 |
| Control | 6011 | RAN binding protein 6                              | gi 7817436<br>2,gi 837159<br>72                  | 47,285.80 | 100.00% | 3  | 3  | 3  | 0.02% | 8.29%  | ITFLLQA<br>IR                                                   | 3.07 | 1,074.67 |
| Control | 6011 | RAN binding protein 6                              | gi 7817436<br>2,gi 837159<br>72                  | 47,285.80 | 100.00% | 3  | 3  | 3  | 0.02% | 8.29%  | KQAEET<br>YENIPGQ<br>SK                                         | 2.99 | 1,721.83 |
| Control | 6011 | RAN binding protein 6                              | gi 7817436<br>2,gi 837159<br>72                  | 47,285.80 | 100.00% | 3  | 3  | 3  | 0.02% | 8.29%  | SLVEIAD<br>TVPK                                                 | 3.07 | 1,171.66 |
| Control | 6011 | chromatin modifyin g protein 4C                    | gi 1140517<br>54,gi 87578<br>327                 | 26,417.80 | 99.80%  | 2  | 2  | 2  | 0.02% | 12.30% | EALENS<br>YTNTEV<br>LK                                          | 3.68 | 1,610.79 |
| Control | 6011 | chromatin modifyin g protein 4C                    | gi 1140517<br>54,gi 87578<br>327                 | 26,417.80 | 99.80%  | 2  | 2  | 2  | 0.02% | 12.30% | LPNAPSS<br>SLPAQP<br>DR                                         | 3.53 | 1,549.80 |
| Control | 6011 | RecName : Full=LA G1 longevity assurance homolog 2 | gi 1098925<br>06,gi 73587<br>265,gi 7773<br>6279 | 44,887.70 | 99.80%  | 2  | 2  | 3  | 0.02% | 10.00% | AGTLIM<br>ALHDSS<br>DYLLES<br>AK                                | 3.12 | 2,151.06 |



|         |      |                                                                                                                                                                                                                                                           |                                                                                |           |         |   |   |   |       |        |                                 |          |
|---------|------|-----------------------------------------------------------------------------------------------------------------------------------------------------------------------------------------------------------------------------------------------------------|--------------------------------------------------------------------------------|-----------|---------|---|---|---|-------|--------|---------------------------------|----------|
| Control | 6011 | RecName<br>:<br>Full=LA<br>G1<br>longevity<br>assurance<br>homolog<br>2                                                                                                                                                                                   | gi 1098925<br>06,gi 73587<br>265,gi 7773<br>6279                               | 44,887.70 | 99.80%  | 2 | 2 | 3 | 0.02% | 10.00% | LRAPPNP 3.19<br>TLEHFY<br>MTSGK | 2,075.04 |
| Control | 6011 | RecName<br>:<br>Full=Pept<br>idyl-<br>prolyl cis-<br>trans<br>isomerase<br>B;<br>Short=PP<br>Iase;<br>Short=Ro<br>tamase;<br>AltName:<br>Full=Cyc<br>lophilin<br>B;<br>AltName:<br>Full=S-<br>cyclophili<br>n;<br>Short=SC<br>YLP;<br>Flags:<br>Precursor | gi 2152742<br>38,gi 27806<br>469,gi 5292<br>42,gi 59858<br>297,gi 7426<br>8324 | 23,726.00 | 99.80%  | 2 | 2 | 3 | 0.02% | 12.50% | TVDNFV 4.5<br>ALATGE<br>K       | 1,364.71 |
| Control | 6011 | RecName<br>:<br>Full=Pept<br>idyl-<br>prolyl cis-<br>trans<br>isomerase<br>B;<br>Short=PP<br>Iase;<br>Short=Ro<br>tamase;<br>AltName:<br>Full=Cyc<br>lophilin<br>B;<br>AltName:<br>Full=S-<br>cyclophili<br>n;<br>Short=SC<br>YLP;<br>Flags:<br>Precursor | gi 2152742<br>38,gi 27806<br>469,gi 5292<br>42,gi 59858<br>297,gi 7426<br>8324 | 23,726.00 | 99.80%  | 2 | 2 | 3 | 0.02% | 12.50% | VIKDFMI 3.58<br>QGGDFT<br>R     | 1,642.83 |
| Control | 6011 | FLOT2<br>protein                                                                                                                                                                                                                                          | gi 1515536<br>23,gi 16445<br>2939                                              | 46,976.90 | 100.00% | 7 | 8 | 9 | 0.07% | 23.10% | DVYDKV 3.05<br>DYLSSL<br>GK     | 1,601.81 |
| Control | 6011 | FLOT2<br>protein                                                                                                                                                                                                                                          | gi 1515536<br>23,gi 16445<br>2939                                              | 46,976.90 | 100.00% | 7 | 8 | 9 | 0.07% | 23.10% | KIGEAEA 3.63<br>AVIEAR          | 1,356.75 |

|         |      |                                                                                                                                        |                                      |           |         |   |   |   |       |        |                                                      |          |
|---------|------|----------------------------------------------------------------------------------------------------------------------------------------|--------------------------------------|-----------|---------|---|---|---|-------|--------|------------------------------------------------------|----------|
| Control | 6011 | FLOT2 protein                                                                                                                          | gi 151553623,gi 164452939            | 46,976.90 | 100.00% | 7 | 8 | 9 | 0.07% | 23.10% | LLAELPA 4.42<br>SVHALT<br>GVDLSK                     | 1,934.10 |
| Control | 6011 | FLOT2 protein                                                                                                                          | gi 151553623,gi 164452939            | 46,976.90 | 100.00% | 7 | 8 | 9 | 0.07% | 23.10% | MALVLD 3.86<br>ALPR                                  | 1,114.63 |
| Control | 6011 | FLOT2 protein                                                                                                                          | gi 151553623,gi 164452939            | 46,976.90 | 100.00% | 7 | 8 | 9 | 0.07% | 23.10% | NVVLQT 2.14<br>LEGHLR                                | 1,378.78 |
| Control | 6011 | FLOT2 protein                                                                                                                          | gi 151553623,gi 164452939            | 46,976.90 | 100.00% | 7 | 8 | 9 | 0.07% | 23.10% | QVLLAQ 3.16<br>AEAEK                                 | 1,199.66 |
| Control | 6011 | FLOT2 protein                                                                                                                          | gi 151553623,gi 164452939            | 46,976.90 | 100.00% | 7 | 8 | 9 | 0.07% | 23.10% | SILGTLT 2.33<br>VEQIYQ<br>DRDQFA<br>K                | 2,325.21 |
| Control | 6011 | RecName :<br>Full=GPI<br>transamidase<br>component PIG-S;<br>AltName:<br>Full=Phosphatidylinositol-glycan biosynthesis class S protein | gi 116248578,gi 74268100,gi 77735383 | 61,769.20 | 100.00% | 4 | 7 | 8 | 0.06% | 16.40% | APLPYS 3.79<br>QISGLNS<br>LK                         | 1,587.87 |
| Control | 6011 | RecName :<br>Full=GPI<br>transamidase<br>component PIG-S;<br>AltName:<br>Full=Phosphatidylinositol-glycan biosynthesis class S protein | gi 116248578,gi 74268100,gi 77735383 | 61,769.20 | 100.00% | 4 | 7 | 8 | 0.06% | 16.40% | FDSASSS 4.44<br>YYLAAH<br>SLPHVIN<br>PVESR           | 2,747.34 |
| Control | 6011 | RecName :<br>Full=GPI<br>transamidase<br>component PIG-S;<br>AltName:<br>Full=Phosphatidylinositol-glycan biosynthesis class S protein | gi 116248578,gi 74268100,gi 77735383 | 61,769.20 | 100.00% | 4 | 7 | 8 | 0.06% | 16.40% | LMVPVT 4.48<br>VVFTQE<br>SVPLDD<br>QEKL PFT<br>VVHER | 3,468.81 |

|         |      |                                                                                                                                                                                                                   |           |         |   |   |   |       |        |                                   |      |          |
|---------|------|-------------------------------------------------------------------------------------------------------------------------------------------------------------------------------------------------------------------|-----------|---------|---|---|---|-------|--------|-----------------------------------|------|----------|
| Control | 6011 | RecName gi 1162485 :<br>78_gi 74268<br>Full=GPI 100_gi 7773<br>transamid 5383<br>ase<br>compone<br>nt PIG-S;<br>AltName:<br>Full=Pho<br>sphatidyl-<br>inositol-<br>glycan<br>biosynthe-<br>sis class<br>S protein | 61,769.20 | 100.00% | 4 | 7 | 8 | 0.06% | 16.40% | SVENLA<br>TATTTL<br>TSLAQL<br>LGK | 4.51 | 2,132.18 |
| Control | 6011 | PREDIC gi 1946703<br>TED: 61<br>phosphoe<br>nolpyruv<br>ate<br>carboxyki<br>nase 2<br>(mitocho<br>ndrial)<br>isoform 1                                                                                            | 70,632.70 | 100.00% | 3 | 3 | 3 | 0.02% | 6.56%  | EIISFGSG<br>YGGNSL<br>LGK         | 3.37 | 1,698.87 |
| Control | 6011 | PREDIC gi 1946703<br>TED: 61<br>phosphoe<br>nolpyruv<br>ate<br>carboxyki<br>nase 2<br>(mitocho<br>ndrial)<br>isoform 1                                                                                            | 70,632.70 | 100.00% | 3 | 3 | 3 | 0.02% | 6.56%  | EVLAEL<br>EALEGR                  | 2.3  | 1,328.71 |
| Control | 6011 | PREDIC gi 1946703<br>TED: 61<br>phosphoe<br>nolpyruv<br>ate<br>carboxyki<br>nase 2<br>(mitocho<br>ndrial)<br>isoform 1                                                                                            | 70,632.70 | 100.00% | 3 | 3 | 3 | 0.02% | 6.56%  | SYLTEQ<br>VNQDLP<br>K             | 3.79 | 1,534.77 |

|         |      |                                                                                                                                                                                                                                                                                                       |            |           |         |   |   |   |       |       |                                  |          |
|---------|------|-------------------------------------------------------------------------------------------------------------------------------------------------------------------------------------------------------------------------------------------------------------------------------------------------------|------------|-----------|---------|---|---|---|-------|-------|----------------------------------|----------|
| Control | 6011 | PREDIC<br>TED:<br>similar to<br>1-<br>acylglyce<br>rophosph<br>ocholine<br>O-<br>acyltransf<br>erase 1<br>(Lung-<br>type acyl-<br>CoA:lyso<br>phosphati<br>dylcholin<br>e<br>acyltransf<br>erase 1)<br>(Lysopho<br>sphatidyl<br>choline<br>acyltransf<br>erase 1)<br>(Acyltran<br>sferase-<br>like 2) | gi 1946764 | 54,069.40 | 100.00% | 3 | 3 | 3 | 0.02% | 7.84% | MFGSQD 2.49<br>GSVEEH<br>ALSSILK | 2,050.98 |
| Control | 6011 | PREDIC<br>TED:<br>similar to<br>1-<br>acylglyce<br>rophosph<br>ocholine<br>O-<br>acyltransf<br>erase 1<br>(Lung-<br>type acyl-<br>CoA:lyso<br>phosphati<br>dylcholin<br>e<br>acyltransf<br>erase 1)<br>(Lysopho<br>sphatidyl<br>choline<br>acyltransf<br>erase 1)<br>(Acyltran<br>sferase-<br>like 2) | gi 1946764 | 54,069.40 | 100.00% | 3 | 3 | 3 | 0.02% | 7.84% | TLDTIQL 2.99<br>AFK              | 1,149.65 |

|         |      |                                                                                                                                                                                                              |                                                                                   |           |         |   |   |   |       |        |                                               |      |          |
|---------|------|--------------------------------------------------------------------------------------------------------------------------------------------------------------------------------------------------------------|-----------------------------------------------------------------------------------|-----------|---------|---|---|---|-------|--------|-----------------------------------------------|------|----------|
| Control | 6011 | PREDICTED:<br>similar to<br>1-acylglycerophosphocholine O-acyltransferase 1 (Lung-type acyl-CoA:lysophosphatidylcholine acyltransferase 1) (Lysosphatidylcholine acyltransferase 1) (Acyltransferase-like 2) | gi 194676422                                                                      | 54,069.40 | 100.00% | 3 | 3 | 3 | 0.02% | 7.84%  | YIRPVFVSR                                     | 2.63 | 1,136.66 |
| Control | 6011 | YWHAG protein                                                                                                                                                                                                | gi 157279400,gi 157744500,gi 2852385,gi 71153781                                  | 28,235.10 | 99.80%  | 2 | 2 | 4 | 0.03% | 17.40% | NVTELN<br>EPLSNEER                            | 4.14 | 1,643.79 |
| Control | 6011 | YWHAG protein                                                                                                                                                                                                | gi 157279400,gi 157744500,gi 2852385,gi 71153781                                  | 28,235.10 | 99.80%  | 2 | 2 | 4 | 0.03% | 17.40% | TAFDDAI<br>AELDTL<br>NEDSYK<br>DSTLIM<br>QLLR | 4.34 | 3,317.61 |
| Control | 6011 | Chain C, Subcomplex Of The Stator Of Bovine Mitochondrial Atp Synthase                                                                                                                                       | gi 110591028,gi 110591031,gi 114687,gi 163036,gi 27807291,gi 55670489,gi 73586602 | 12,514.70 | 99.80%  | 2 | 2 | 2 | 0.02% | 43.50% | ADMNTF<br>PNFTFED<br>PKFEVV<br>EKPQS          | 3.24 | 2,833.30 |
| Control | 6011 | Chain C, Subcomplex Of The Stator Of Bovine Mitochondrial Atp Synthase                                                                                                                                       | gi 110591028,gi 110591031,gi 114687,gi 163036,gi 27807291,gi 55670489,gi 73586602 | 12,514.70 | 99.80%  | 2 | 2 | 2 | 0.02% | 43.50% | QTSGGP<br>VDAGPE<br>YQQDLL<br>RELFK           | 3.86 | 2,550.21 |
| Control | 6011 | heterogeneous nuclear ribonucleoprotein A2/B1                                                                                                                                                                | gi 114051756,gi 122145945,gi 87578315                                             | 35,988.50 | 99.80%  | 2 | 3 | 3 | 0.02% | 13.20% | GFGFVT<br>FDDHDP<br>VDKIVL<br>QK              | 2.96 | 2,277.16 |
| Control | 6011 | heterogeneous nuclear ribonucleoprotein A2/B1                                                                                                                                                                | gi 114051756,gi 122145945,gi 87578315                                             | 35,988.50 | 99.80%  | 2 | 3 | 3 | 0.02% | 13.20% | NMGGPY<br>GGGNYG<br>PGGSGG<br>SGGYGG<br>R     | 5.88 | 2,205.90 |

|         |      |                                                       |                                                                                                                                                                                    |            |         |    |    |    |       |        |                                          |          |
|---------|------|-------------------------------------------------------|------------------------------------------------------------------------------------------------------------------------------------------------------------------------------------|------------|---------|----|----|----|-------|--------|------------------------------------------|----------|
| Control | 6011 | RecName<br>:<br>Full=Clat<br>hrin<br>heavy<br>chain 1 | gi 1705915,<br>gi 2780668<br>9,gi 565545<br>48,gi 56554<br>549,gi 5655<br>4550,gi 565<br>54551,gi 56<br>554552,gi 5<br>6554553,gi <br>56554554,g<br>i 56554555,<br>gi 5655455<br>6 | 186,919.60 | 100.00% | 10 | 13 | 15 | 0.12% | 10.10% | AFMTAD 4.72<br>LPNELIE<br>LLEK           | 1,963.01 |
| Control | 6011 | RecName<br>:<br>Full=Clat<br>hrin<br>heavy<br>chain 1 | gi 1705915,<br>gi 2780668<br>9,gi 565545<br>48,gi 56554<br>549,gi 5655<br>4550,gi 565<br>54551,gi 56<br>554552,gi 5<br>6554553,gi <br>56554554,g<br>i 56554555,<br>gi 5655455<br>6 | 186,919.60 | 100.00% | 10 | 13 | 15 | 0.12% | 10.10% | GYFEELI 3.01<br>TMLEAA<br>LGLER          | 2,071.04 |
| Control | 6011 | RecName<br>:<br>Full=Clat<br>hrin<br>heavy<br>chain 1 | gi 1705915,<br>gi 2780668<br>9,gi 565545<br>48,gi 56554<br>549,gi 5655<br>4550,gi 565<br>54551,gi 56<br>554552,gi 5<br>6554553,gi <br>56554554,g<br>i 56554555,<br>gi 5655455<br>6 | 186,919.60 | 100.00% | 10 | 13 | 15 | 0.12% | 10.10% | ISGETIF 4.52<br>VTAPHE<br>ATAGIIG<br>VNR | 2,353.25 |
| Control | 6011 | RecName<br>:<br>Full=Clat<br>hrin<br>heavy<br>chain 1 | gi 1705915,<br>gi 2780668<br>9,gi 565545<br>48,gi 56554<br>549,gi 5655<br>4550,gi 565<br>54551,gi 56<br>554552,gi 5<br>6554553,gi <br>56554554,g<br>i 56554555,<br>gi 5655455<br>6 | 186,919.60 | 100.00% | 10 | 13 | 15 | 0.12% | 10.10% | KFDVNT 4.96<br>SAVQVLI<br>EHIGNL<br>DR   | 2,368.26 |
| Control | 6011 | RecName<br>:<br>Full=Clat<br>hrin<br>heavy<br>chain 1 | gi 1705915,<br>gi 2780668<br>9,gi 565545<br>48,gi 56554<br>549,gi 5655<br>4550,gi 565<br>54551,gi 56<br>554552,gi 5<br>6554553,gi <br>56554554,g<br>i 56554555,<br>gi 5655455<br>6 | 186,919.60 | 100.00% | 10 | 13 | 15 | 0.12% | 10.10% | LASTLV 3.17<br>HLGEYQ<br>AAVDGA<br>R     | 1,971.03 |

|         |      |                                                       |                                                                                                                                                                                    |            |         |    |    |    |       |        |                                |          |
|---------|------|-------------------------------------------------------|------------------------------------------------------------------------------------------------------------------------------------------------------------------------------------|------------|---------|----|----|----|-------|--------|--------------------------------|----------|
| Control | 6011 | RecName<br>:<br>Full=Clat<br>hrin<br>heavy<br>chain 1 | gi 1705915,<br>gi 2780668<br>9,gi 565545<br>48,gi 56554<br>549,gi 5655<br>4550,gi 565<br>54551,gi 56<br>554552,gi 5<br>6554553,gi <br>56554554,g<br>i 56554555,<br>gi 5655455<br>6 | 186,919.60 | 100.00% | 10 | 13 | 15 | 0.12% | 10.10% | LLYNNV 3.92<br>SNFGR           | 1,296.67 |
| Control | 6011 | RecName<br>:<br>Full=Clat<br>hrin<br>heavy<br>chain 1 | gi 1705915,<br>gi 2780668<br>9,gi 565545<br>48,gi 56554<br>549,gi 5655<br>4550,gi 565<br>54551,gi 56<br>554552,gi 5<br>6554553,gi <br>56554554,g<br>i 56554555,<br>gi 5655455<br>6 | 186,919.60 | 100.00% | 10 | 13 | 15 | 0.12% | 10.10% | NLQNLLI 4.06<br>LTAIK          | 1,353.85 |
| Control | 6011 | RecName<br>:<br>Full=Clat<br>hrin<br>heavy<br>chain 1 | gi 1705915,<br>gi 2780668<br>9,gi 565545<br>48,gi 56554<br>549,gi 5655<br>4550,gi 565<br>54551,gi 56<br>554552,gi 5<br>6554553,gi <br>56554554,g<br>i 56554555,<br>gi 5655455<br>6 | 186,919.60 | 100.00% | 10 | 13 | 15 | 0.12% | 10.10% | NNLAGA 3.18<br>EELFAR          | 1,304.66 |
| Control | 6011 | RecName<br>:<br>Full=Clat<br>hrin<br>heavy<br>chain 1 | gi 1705915,<br>gi 2780668<br>9,gi 565545<br>48,gi 56554<br>549,gi 5655<br>4550,gi 565<br>54551,gi 56<br>554552,gi 5<br>6554553,gi <br>56554554,g<br>i 56554555,<br>gi 5655455<br>6 | 186,919.60 | 100.00% | 10 | 13 | 15 | 0.12% | 10.10% | RPISADS 3.12<br>AIMNPA<br>SK   | 1,573.80 |
| Control | 6011 | RecName<br>:<br>Full=Clat<br>hrin<br>heavy<br>chain 1 | gi 1705915,<br>gi 2780668<br>9,gi 565545<br>48,gi 56554<br>549,gi 5655<br>4550,gi 565<br>54551,gi 56<br>554552,gi 5<br>6554553,gi <br>56554554,g<br>i 56554555,<br>gi 5655455<br>6 | 186,919.60 | 100.00% | 10 | 13 | 15 | 0.12% | 10.10% | TSIDAYD 3.41<br>NFDNISL<br>AQR | 1,942.91 |

|         |      |                                                                                    |                                                                  |           |         |   |   |    |       |        |                                        |      |          |
|---------|------|------------------------------------------------------------------------------------|------------------------------------------------------------------|-----------|---------|---|---|----|-------|--------|----------------------------------------|------|----------|
| Control | 6011 | hydroxyst<br>eroid (17-<br>beta)<br>dehydrog<br>enase 11                           | gi 1140528<br>gi 86438<br>493                                    | 35,077.20 | 100.00% | 5 | 7 | 11 | 0.09% | 22.50% | FDAVIG<br>YK                           | 2.92 | 912.4826 |
| Control | 6011 | hydroxyst<br>eroid (17-<br>beta)<br>dehydrog<br>enase 11                           | gi 1140528<br>gi 86438<br>493                                    | 35,077.20 | 100.00% | 5 | 7 | 11 | 0.09% | 22.50% | KSVTGEI<br>VLITGA<br>GHGIGR            | 4.45 | 1,865.06 |
| Control | 6011 | hydroxyst<br>eroid (17-<br>beta)<br>dehydrog<br>enase 11                           | gi 1140528<br>gi 86438<br>493                                    | 35,077.20 | 100.00% | 5 | 7 | 11 | 0.09% | 22.50% | LIDGILT<br>EQKMIF<br>VPSSLNF<br>LSLMEK | 2.96 | 2,982.59 |
| Control | 6011 | hydroxyst<br>eroid (17-<br>beta)<br>dehydrog<br>enase 11                           | gi 1140528<br>gi 86438<br>493                                    | 35,077.20 | 100.00% | 5 | 7 | 11 | 0.09% | 22.50% | NPSTSLG<br>PTLEPEE<br>VVNK             | 4.66 | 1,910.97 |
| Control | 6011 | hydroxyst<br>eroid (17-<br>beta)<br>dehydrog<br>enase 11                           | gi 1140528<br>gi 86438<br>493                                    | 35,077.20 | 100.00% | 5 | 7 | 11 | 0.09% | 22.50% | SVTGEIV<br>LITGAG<br>HGIGR             | 5.19 | 1,736.97 |
| Control | 6011 | pre-B-cell<br>leukemia<br>transcript<br>ion factor<br>interactin<br>g protein<br>1 | gi 1103317<br>gi 11549<br>7324,gi 151<br>554897,gi 1<br>58706093 | 80,239.50 | 100.00% | 3 | 3 | 3  | 0.02% | 6.19%  | ALESEL<br>QQLR                         | 3.44 | 1,186.64 |
| Control | 6011 | pre-B-cell<br>leukemia<br>transcript<br>ion factor<br>interactin<br>g protein<br>1 | gi 1103317<br>gi 11549<br>7324,gi 151<br>554897,gi 1<br>58706093 | 80,239.50 | 100.00% | 3 | 3 | 3  | 0.02% | 6.19%  | EQGPTG<br>QEPPSPGF<br>LEQK             | 3.53 | 1,828.87 |
| Control | 6011 | pre-B-cell<br>leukemia<br>transcript<br>ion factor<br>interactin<br>g protein<br>1 | gi 1103317<br>gi 11549<br>7324,gi 151<br>554897,gi 1<br>58706093 | 80,239.50 | 100.00% | 3 | 3 | 3  | 0.02% | 6.19%  | LLQAQL<br>QAQKEE<br>LQSLMR             | 4.58 | 2,143.15 |
| Control | 6011 | Ribosom<br>al protein<br>S3                                                        | gi 7426822<br>6,gi 774042<br>90,gi 91207<br>641                  | 26,670.50 | 100.00% | 3 | 3 | 3  | 0.02% | 19.30% | AELNEFL<br>TR                          | 2.89 | 1,092.57 |
| Control | 6011 | Ribosom<br>al protein<br>S3                                                        | gi 7426822<br>6,gi 774042<br>90,gi 91207<br>641                  | 26,670.50 | 100.00% | 3 | 3 | 3  | 0.02% | 19.30% | FVDGLM<br>IHSGDPV<br>NYYYVDT<br>AVR    | 5.88 | 2,484.19 |
| Control | 6011 | Ribosom<br>al protein<br>S3                                                        | gi 7426822<br>6,gi 774042<br>90,gi 91207<br>641                  | 26,670.50 | 100.00% | 3 | 3 | 3  | 0.02% | 19.30% | GGKPEP<br>PAMPQP<br>VPTA               | 3.52 | 1,589.80 |



|         |      |                                                             |            |           |         |    |    |    |       |        |                             |      |          |
|---------|------|-------------------------------------------------------------|------------|-----------|---------|----|----|----|-------|--------|-----------------------------|------|----------|
| Control | 6011 | Leucine zipper-EF hand containin g transmem brane protein 1 | gi 1113086 | 81,801.70 | 100.00% | 10 | 14 | 20 | 0.16% | 19.80% | ADDKLI<br>AEEGVD<br>SLNVK   | 4.97 | 1,815.93 |
| Control | 6011 | Leucine zipper-EF hand containin g transmem brane protein 1 | gi 1113086 | 81,801.70 | 100.00% | 10 | 14 | 20 | 0.16% | 19.80% | AMYLPE<br>TLSPAD<br>QLK     | 3.67 | 1,692.85 |
| Control | 6011 | Leucine zipper-EF hand containin g transmem brane protein 1 | gi 1113086 | 81,801.70 | 100.00% | 10 | 14 | 20 | 0.16% | 19.80% | FLQDTIE<br>EMALK            | 3.89 | 1,453.72 |
| Control | 6011 | Leucine zipper-EF hand containin g transmem brane protein 1 | gi 1113086 | 81,801.70 | 100.00% | 10 | 14 | 20 | 0.16% | 19.80% | IRETGER<br>PSNEEIM<br>R     | 1.72 | 1,832.89 |
| Control | 6011 | Leucine zipper-EF hand containin g transmem brane protein 1 | gi 1113086 | 81,801.70 | 100.00% | 10 | 14 | 20 | 0.16% | 19.80% | KLEEGG<br>PVYSPP<br>AQAAVR  | 3.03 | 1,868.99 |
| Control | 6011 | Leucine zipper-EF hand containin g transmem brane protein 1 | gi 1113086 | 81,801.70 | 100.00% | 10 | 14 | 20 | 0.16% | 19.80% | LEEGGP<br>VYSPPA<br>QAAVR   | 3.93 | 1,740.89 |
| Control | 6011 | Leucine zipper-EF hand containin g transmem brane protein 1 | gi 1113086 | 81,801.70 | 100.00% | 10 | 14 | 20 | 0.16% | 19.80% | LFPNML<br>PSTFETQ<br>SSKEER | 1.92 | 2,257.08 |
| Control | 6011 | Leucine zipper-EF hand containin g transmem brane protein 1 | gi 1113086 | 81,801.70 | 100.00% | 10 | 14 | 20 | 0.16% | 19.80% | LLELQSI<br>GTNNFL<br>R      | 4.17 | 1,617.90 |

|         |      |                                                            |            |           |         |    |    |    |       |        |                                          |          |
|---------|------|------------------------------------------------------------|------------|-----------|---------|----|----|----|-------|--------|------------------------------------------|----------|
| Control | 6011 | Leucine zipper-EF-hand containin g transmembrane protein 1 | gi 1113086 | 81,801.70 | 100.00% | 10 | 14 | 20 | 0.16% | 19.80% | LLSLASA 2.2<br>LDDNKD<br>GKVDID<br>DLVK  | 2,457.31 |
| Control | 6011 | Leucine zipper-EF-hand containin g transmembrane protein 1 | gi 1113086 | 81,801.70 | 100.00% | 10 | 14 | 20 | 0.16% | 19.80% | STLQTLP 2.77<br>EIVAK                    | 1,299.75 |
| Control | 6011 | unnamed protein product                                    | gi 1175760 | 30,875.20 | 99.80%  | 2  | 2  | 4  | 0.03% | 8.52%  | EMIETLA 3.02<br>HKLDEK                   | 1,572.79 |
| Control | 6011 | unnamed protein product                                    | gi 1175760 | 30,875.20 | 99.80%  | 2  | 2  | 4  | 0.03% | 8.52%  | QNLNLQ 2.9<br>EVLK                       | 1,198.68 |
| Control | 6011 | voltage-dependent anion channel 1                          | gi 8810220 | 30,723.80 | 100.00% | 9  | 10 | 40 | 0.31% | 35.70% | LTFDSSF 4.4<br>SPNTGK                    | 1,400.67 |
| Control | 6011 | voltage-dependent anion channel 1                          | gi 8810220 | 30,723.80 | 100.00% | 9  | 10 | 40 | 0.31% | 35.70% | LTFDSSF 1.93<br>SPNTGK<br>K              | 1,528.76 |
| Control | 6011 | voltage-dependent anion channel 1                          | gi 8810220 | 30,723.80 | 100.00% | 9  | 10 | 40 | 0.31% | 35.70% | LTLSALL 3.74<br>DGK                      | 1,030.61 |
| Control | 6011 | voltage-dependent anion channel 1                          | gi 8810220 | 30,723.80 | 100.00% | 9  | 10 | 40 | 0.31% | 35.70% | SENGLEF 4.53<br>TSSGSA<br>NTETTK         | 1,959.88 |
| Control | 6011 | voltage-dependent anion channel 1                          | gi 8810220 | 30,723.80 | 100.00% | 9  | 10 | 40 | 0.31% | 35.70% | SRVTQS 4.11<br>NFAVGY<br>K               | 1,456.75 |
| Control | 6011 | voltage-dependent anion channel 1                          | gi 8810220 | 30,723.80 | 100.00% | 9  | 10 | 40 | 0.31% | 35.70% | TDEFQL 6.18<br>HTNVND<br>GTEFGG<br>SIYQK | 2,600.19 |
| Control | 6011 | voltage-dependent anion channel 1                          | gi 8810220 | 30,723.80 | 100.00% | 9  | 10 | 40 | 0.31% | 35.70% | TKSENG 5.66<br>LEFTSSG<br>SANTET<br>TK   | 2,189.02 |
| Control | 6011 | voltage-dependent anion channel 1                          | gi 8810220 | 30,723.80 | 100.00% | 9  | 10 | 40 | 0.31% | 35.70% | VNNSSLI 4.71<br>GLGYTQ<br>TLKPGIK        | 2,103.18 |
| Control | 6011 | voltage-dependent anion channel 1                          | gi 8810220 | 30,723.80 | 100.00% | 9  | 10 | 40 | 0.31% | 35.70% | VTQSNF 3.9<br>AVGYK                      | 1,213.62 |

|         |      |                                   |                                                                  |           |         |   |   |    |       |        |                            |      |          |
|---------|------|-----------------------------------|------------------------------------------------------------------|-----------|---------|---|---|----|-------|--------|----------------------------|------|----------|
| Control | 6011 | voltage-dependent anion channel 2 | gi 59858401,gi 62177148,gi 73586695,gi 8810222,gi 90111864       | 31,602.50 | 100.00% | 8 | 9 | 31 | 0.24% | 32.30% | GFGFGL VK                  | 1.96 | 824.4666 |
| Control | 6011 | voltage-dependent anion channel 2 | gi 59858401,gi 62177148,gi 73586695,gi 8810222,gi 90111864       | 31,602.50 | 100.00% | 8 | 9 | 31 | 0.24% | 32.30% | LTFDITF SPNTGK             | 3.02 | 1,428.70 |
| Control | 6011 | voltage-dependent anion channel 2 | gi 59858401,gi 62177148,gi 73586695,gi 8810222,gi 90111864       | 31,602.50 | 100.00% | 8 | 9 | 31 | 0.24% | 32.30% | LTFDITF SPNTGK K           | 3.89 | 1,556.80 |
| Control | 6011 | voltage-dependent anion channel 2 | gi 59858401,gi 62177148,gi 73586695,gi 8810222,gi 90111864       | 31,602.50 | 100.00% | 8 | 9 | 31 | 0.24% | 32.30% | LTLSAL VDGK                | 3.26 | 1,016.60 |
| Control | 6011 | voltage-dependent anion channel 2 | gi 59858401,gi 62177148,gi 73586695,gi 8810222,gi 90111864       | 31,602.50 | 100.00% | 8 | 9 | 31 | 0.24% | 32.30% | NNFAVG YR                  | 2.17 | 940.4634 |
| Control | 6011 | voltage-dependent anion channel 2 | gi 59858401,gi 62177148,gi 73586695,gi 8810222,gi 90111864       | 31,602.50 | 100.00% | 8 | 9 | 31 | 0.24% | 32.30% | TGDFQL HTNVND GTEFGG SIYQK | 5.81 | 2,528.17 |
| Control | 6011 | voltage-dependent anion channel 2 | gi 59858401,gi 62177148,gi 73586695,gi 8810222,gi 90111864       | 31,602.50 | 100.00% | 8 | 9 | 31 | 0.24% | 32.30% | VNSSLI GVGYTQ TLRPGV K     | 4.88 | 2,103.16 |
| Control | 6011 | voltage-dependent anion channel 2 | gi 59858401,gi 62177148,gi 73586695,gi 8810222,gi 90111864       | 31,602.50 | 100.00% | 8 | 9 | 31 | 0.24% | 32.30% | YQLDPT ASISAK              | 3.16 | 1,293.67 |
| Control | 6011 | Trx-like protein                  | gi 109726696,gi 115494922,gi 122145628,gi 126920889,gi 146231808 | 31,563.90 | 100.00% | 4 | 4 | 4  | 0.03% | 8.63%  | KLLPESS QPLK               | 2.89 | 1,239.73 |
| Control | 6011 | Trx-like protein                  | gi 109726696,gi 115494922,gi 122145628,gi 126920889,gi 146231808 | 31,563.90 | 100.00% | 4 | 4 | 4  | 0.03% | 8.63%  | KLLPESS QPLKK              | 3.86 | 1,367.83 |

|         |      |                                                      |                                                                         |            |         |   |   |   |       |        |                                                 |          |
|---------|------|------------------------------------------------------|-------------------------------------------------------------------------|------------|---------|---|---|---|-------|--------|-------------------------------------------------|----------|
| Control | 6011 | Trx-like protein                                     | gi 109726696,gi 115494922,gi 122145628,gi 126920889,gi 146231808        | 31,563.90  | 100.00% | 4 | 4 | 4 | 0.03% | 8.63%  | LLPESSQ 2.33<br>PLKK                            | 1,239.73 |
| Control | 6011 | Trx-like protein                                     | gi 109726696,gi 115494922,gi 122145628,gi 126920889,gi 146231808        | 31,563.90  | 100.00% | 4 | 4 | 4 | 0.03% | 8.63%  | VDVTEQ 4.54<br>PGLSGR                           | 1,257.64 |
| Control | 6011 | PREDICTED: similar to Veizatin isoform 2             | gi 119891996                                                            | 88,604.30  | 99.80%  | 2 | 2 | 2 | 0.02% | 4.10%  | NDTEEE 3.42<br>NNKTST<br>ADNEISS<br>R           | 2,253.97 |
| Control | 6011 | PREDICTED: similar to Veizatin isoform 2             | gi 119891996                                                            | 88,604.30  | 99.80%  | 2 | 2 | 2 | 0.02% | 4.10%  | YFETQH 2.14<br>QSVQR                            | 1,519.73 |
| Control | 6011 | Ribosomal protein L26                                | gi 148744293,gi 28189348,gi 28189641,gi 62751887,gi 7268218,gi 76613859 | 12,702.40  | 99.70%  | 2 | 2 | 3 | 0.02% | 23.10% | MKFNPF 2.45<br>VTSDR                            | 1,357.66 |
| Control | 6011 | Ribosomal protein L26                                | gi 148744293,gi 28189348,gi 28189641,gi 62751887,gi 7268218,gi 76613859 | 12,702.40  | 99.70%  | 2 | 2 | 3 | 0.02% | 23.10% | SMPIRK 2.97<br>DDEVQV<br>VR                     | 1,687.88 |
| Control | 6011 | endothelial cell-specific molecule 2                 | gi 114053335,gi 86438024                                                | 20,621.00  | 99.80%  | 2 | 3 | 7 | 0.05% | 13.20% | ESEDPQ 5.05<br>KPGSSG<br>LSESGST<br>ANGEK       | 2,378.06 |
| Control | 6011 | endothelial cell-specific molecule 2                 | gi 114053335,gi 86438024                                                | 20,621.00  | 99.80%  | 2 | 3 | 7 | 0.05% | 13.20% | NKESED 3.34<br>PQKPGS<br>SGLSESG<br>STANGE<br>K | 2,620.20 |
| Control | 6011 | PREDICTED: similar to leucyl/cystinyl aminopeptidase | gi 119895933                                                            | 119,380.70 | 100.00% | 4 | 6 | 9 | 0.07% | 6.11%  | ANLINNI 3.64<br>FELAGL<br>GK                    | 1,586.89 |
| Control | 6011 | PREDICTED: similar to leucyl/cystinyl aminopeptidase | gi 119895933                                                            | 119,380.70 | 100.00% | 4 | 6 | 9 | 0.07% | 6.11%  | GLGEHE 4.95<br>LDEDEE<br>DYESSA<br>K            | 2,151.88 |

|         |      |                                                                                                                   |                                                                                                                           |            |         |   |   |   |       |        |                                                                   |      |          |
|---------|------|-------------------------------------------------------------------------------------------------------------------|---------------------------------------------------------------------------------------------------------------------------|------------|---------|---|---|---|-------|--------|-------------------------------------------------------------------|------|----------|
| Control | 6011 | PREDICTED:<br>similar to<br>leucyl/cystinyl<br>aminopeptidase                                                     | gi 1198959                                                                                                                | 119,380.70 | 100.00% | 4 | 6 | 9 | 0.07% | 6.11%  | IFGELSS<br>YEDFLD<br>AR                                           | 4.04 | 1,761.83 |
| Control | 6011 | PREDICTED:<br>similar to<br>leucyl/cystinyl<br>aminopeptidase                                                     | gi 1198959                                                                                                                | 119,380.70 | 100.00% | 4 | 6 | 9 | 0.07% | 6.11%  | IKRDEQ<br>YTALSN<br>MPK                                           | 4.57 | 1,809.92 |
| Control | 6011 | PREDICTED:<br>similar to<br>Zinc<br>finger<br>protein<br>basophilic<br>n-1                                        | gi 7664705                                                                                                                | 111,795.20 | 99.80%  | 2 | 3 | 3 | 0.02% | 2.48%  | IEKETME<br>TADEKR                                                 | 3.86 | 1,595.76 |
| Control | 6011 | PREDICTED:<br>similar to<br>Zinc<br>finger<br>protein<br>basophilic<br>n-1                                        | gi 7664705                                                                                                                | 111,795.20 | 99.80%  | 2 | 3 | 3 | 0.02% | 2.48%  | VEPCVP<br>FPDYIK                                                  | 2.29 | 1,406.70 |
| Control | 6011 | CYB5B<br>protein                                                                                                  | gi 1584550<br>68,gi 76640<br>228                                                                                          | 26,782.70  | 99.80%  | 2 | 4 | 5 | 0.04% | 22.40% | FLDEHP<br>GGEEVL<br>MEQAGG<br>DATESFE<br>DVGHSS<br>DAR            | 4.36 | 3,634.55 |
| Control | 6011 | CYB5B<br>protein                                                                                                  | gi 1584550<br>68,gi 76640<br>228                                                                                          | 26,782.70  | 99.80%  | 2 | 4 | 5 | 0.04% | 22.40% | QYYIGD<br>VHPNDL<br>KPGGGS<br>K                                   | 2.72 | 2,045.01 |
| Control | 6011 | Chain B,<br>Crystal<br>Structure<br>Of<br>Bovine<br>Heart<br>Mitochondrial<br>Bcl-1<br>With<br>Jg144<br>Inhibitor | gi 1147939<br>02,gi 27807<br>143,gi 300,<br>gi 401248,g<br>i 59858351,<br>gi 7358696<br>2,gi 824072<br>77,gi 82407<br>288 | 46,506.00  | 100.00% | 6 | 8 | 9 | 0.07% | 25.70% | EQNGDS<br>LVHAAL<br>VAESAAI<br>GSAEAN<br>AFSVLQ<br>HVLGAG<br>PHVK | 3.4  | 4,065.08 |
| Control | 6011 | Chain B,<br>Crystal<br>Structure<br>Of<br>Bovine<br>Heart<br>Mitochondrial<br>Bcl-1<br>With<br>Jg144<br>Inhibitor | gi 1147939<br>02,gi 27807<br>143,gi 300,<br>gi 401248,g<br>i 59858351,<br>gi 7358696<br>2,gi 824072<br>77,gi 82407<br>288 | 46,506.00  | 100.00% | 6 | 8 | 9 | 0.07% | 25.70% | GSNATS<br>SLYQAV<br>AK                                            | 3.48 | 1,396.71 |

|         |      |                                                                                   |                                                                                           |           |         |   |   |   |       |        |                                 |          |
|---------|------|-----------------------------------------------------------------------------------|-------------------------------------------------------------------------------------------|-----------|---------|---|---|---|-------|--------|---------------------------------|----------|
| Control | 6011 | Chain B, Crystal Structure Of Bovine Heart Mitochondrial Bcl With Jg144 Inhibitor | gi 114793902,gi 27807143,gi 300,gi 401248,gi 59858351,gi 73586962,gi 82407277,gi 82407288 | 46,506.00 | 100.00% | 6 | 8 | 9 | 0.07% | 25.70% | LPNGLVI 3.53<br>ASLENY<br>APASR | 1,885.02 |
| Control | 6011 | Chain B, Crystal Structure Of Bovine Heart Mitochondrial Bcl With Jg144 Inhibitor | gi 114793902,gi 27807143,gi 300,gi 401248,gi 59858351,gi 73586962,gi 82407277,gi 82407288 | 46,506.00 | 100.00% | 6 | 8 | 9 | 0.07% | 25.70% | MALIGL 3.86<br>GVSHPV<br>LK     | 1,450.85 |
| Control | 6011 | Chain B, Crystal Structure Of Bovine Heart Mitochondrial Bcl With Jg144 Inhibitor | gi 114793902,gi 27807143,gi 300,gi 401248,gi 59858351,gi 73586962,gi 82407277,gi 82407288 | 46,506.00 | 100.00% | 6 | 8 | 9 | 0.07% | 25.70% | QVAEQF 3.18<br>LNIR             | 1,217.66 |
| Control | 6011 | Chain B, Crystal Structure Of Bovine Heart Mitochondrial Bcl With Jg144 Inhibitor | gi 114793902,gi 27807143,gi 300,gi 401248,gi 59858351,gi 73586962,gi 82407277,gi 82407288 | 46,506.00 | 100.00% | 6 | 8 | 9 | 0.07% | 25.70% | TIAQGN 4.02<br>LSNPDV<br>QAAK   | 1,626.84 |
| Control | 6011 | Chain A, Crystal Structure Of Bovine Heart Mitochondrial Bcl With Jg144 Inhibitor | gi 114793901,gi 71042575,gi 71042585,gi 7565179,gi 75765190,gi 82407287                   | 49,194.40 | 100.00% | 4 | 7 | 7 | 0.05% | 13.50% | ADLTEY 2.69<br>LSR              | 1,067.54 |

|         |      |                                                                                   |                                                                         |           |         |   |   |   |       |        |                                      |      |          |
|---------|------|-----------------------------------------------------------------------------------|-------------------------------------------------------------------------|-----------|---------|---|---|---|-------|--------|--------------------------------------|------|----------|
| Control | 6011 | Chain A, Crystal Structure Of Bovine Heart Mitochondrial Bcl With Jg144 Inhibitor | gi 114793901,gi 71042575,gi 71042585,gi 7565179,gi 75765190,gi 82407287 | 49,194.40 | 100.00% | 4 | 7 | 7 | 0.05% | 13.50% | EVESMG<br>AHLNAY<br>STR              | 3.36 | 1,680.76 |
| Control | 6011 | Chain A, Crystal Structure Of Bovine Heart Mitochondrial Bcl With Jg144 Inhibitor | gi 114793901,gi 71042575,gi 71042585,gi 7565179,gi 75765190,gi 82407287 | 49,194.40 | 100.00% | 4 | 7 | 7 | 0.05% | 13.50% | MVLAAA<br>GGLEHR                     | 2.75 | 1,240.65 |
| Control | 6011 | Chain A, Crystal Structure Of Bovine Heart Mitochondrial Bcl With Jg144 Inhibitor | gi 114793901,gi 71042575,gi 71042585,gi 7565179,gi 75765190,gi 82407287 | 49,194.40 | 100.00% | 4 | 7 | 7 | 0.05% | 13.50% | TATYAQ<br>ALQSVP<br>ETQVSQ<br>LDNGLR | 3.78 | 2,590.31 |
| Control | 6011 | NADH dehydrogenase (ubiquinone) Fe-S protein 1, 75kDa (NADH-coenzyme Q reductase) | gi 111308529,gi 128825,gi 163414,gi 2780735                             | 79,425.10 | 100.00% | 5 | 5 | 5 | 0.04% | 11.10% | ALSEIAG<br>MTLPYD<br>TLDQVR          | 3.24 | 2,109.05 |
| Control | 6011 | NADH dehydrogenase (ubiquinone) Fe-S protein 1, 75kDa (NADH-coenzyme Q reductase) | gi 111308529,gi 128825,gi 163414,gi 2780735                             | 79,425.10 | 100.00% | 5 | 5 | 5 | 0.04% | 11.10% | AVEDKN<br>IGPLVK                     | 3.37 | 1,282.74 |

|         |      |                                                                                   |                                                    |           |         |    |    |    |       |        |                                  |      |          |
|---------|------|-----------------------------------------------------------------------------------|----------------------------------------------------|-----------|---------|----|----|----|-------|--------|----------------------------------|------|----------|
| Control | 6011 | NADH dehydrogenase (ubiquinone) Fe-S protein 1, 75kDa (NADH-coenzyme Q reductase) | gi 111308529,gi 128825,gi 163414,gi 2780735        | 79,425.10 | 100.00% | 5  | 5  | 5  | 0.04% | 11.10% | ILQDIAS<br>GSHPF<br>QVLQEA<br>K  | 3.62 | 2,168.13 |
| Control | 6011 | NADH dehydrogenase (ubiquinone) Fe-S protein 1, 75kDa (NADH-coenzyme Q reductase) | gi 111308529,gi 128825,gi 163414,gi 2780735        | 79,425.10 | 100.00% | 5  | 5  | 5  | 0.04% | 11.10% | NRLEEV<br>SPNLVR                 | 2.78 | 1,425.78 |
| Control | 6011 | NADH dehydrogenase (ubiquinone) Fe-S protein 1, 75kDa (NADH-coenzyme Q reductase) | gi 111308529,gi 128825,gi 163414,gi 2780735        | 79,425.10 | 100.00% | 5  | 5  | 5  | 0.04% | 11.10% | YDDVEG<br>ANYFQQ<br>ASELSK       | 2.68 | 2,063.92 |
| Control | 6011 | Flotillin 1                                                                       | gi 115305033,gi 116004001,gi 118572320,gi 75775078 | 47,334.80 | 100.00% | 13 | 17 | 21 | 0.16% | 41.90% | AQQVAV<br>QEQEIAR                | 4.53 | 1,469.77 |
| Control | 6011 | Flotillin 1                                                                       | gi 115305033,gi 116004001,gi 118572320,gi 75775078 | 47,334.80 | 100.00% | 13 | 17 | 21 | 0.16% | 41.90% | DIHDDQ<br>DYLHSL<br>GK           | 3.41 | 1,655.77 |
| Control | 6011 | Flotillin 1                                                                       | gi 115305033,gi 116004001,gi 118572320,gi 75775078 | 47,334.80 | 100.00% | 13 | 17 | 21 | 0.16% | 41.90% | ISLNTLT<br>LNVK                  | 3.2  | 1,215.73 |
| Control | 6011 | Flotillin 1                                                                       | gi 115305033,gi 116004001,gi 118572320,gi 75775078 | 47,334.80 | 100.00% | 13 | 17 | 21 | 0.16% | 41.90% | ITLVSSG<br>SGAMGA<br>AK          | 4.34 | 1,365.70 |
| Control | 6011 | Flotillin 1                                                                       | gi 115305033,gi 116004001,gi 118572320,gi 75775078 | 47,334.80 | 100.00% | 13 | 17 | 21 | 0.16% | 41.90% | KAEAFQ<br>LYQEAA<br>QLDMLL<br>EK | 3.92 | 2,355.19 |



|         |      |                                      |                                                                         |           |         |    |    |    |       |        |                                                                |          |
|---------|------|--------------------------------------|-------------------------------------------------------------------------|-----------|---------|----|----|----|-------|--------|----------------------------------------------------------------|----------|
| Control | 6011 | Flotillin 1                          | gi 115305033,gi 116004001,gi 118572320,gi 75775078                      | 47,334.80 | 100.00% | 13 | 17 | 21 | 0.16% | 41.90% | KAEAFQ 4.21<br>LYQEAA<br>QLDMLL<br>EKLPQV<br>AEEISGP<br>LTSANK | 4,090.11 |
| Control | 6011 | Flotillin 1                          | gi 115305033,gi 116004001,gi 118572320,gi 75775078                      | 47,334.80 | 100.00% | 13 | 17 | 21 | 0.16% | 41.90% | LPQVAE 5.12<br>EISGPLT<br>SANK                                 | 1,753.93 |
| Control | 6011 | Flotillin 1                          | gi 115305033,gi 116004001,gi 118572320,gi 75775078                      | 47,334.80 | 100.00% | 13 | 17 | 21 | 0.16% | 41.90% | MRGEAE 2.97<br>AFAIGAR                                         | 1,394.68 |
| Control | 6011 | Flotillin 1                          | gi 115305033,gi 116004001,gi 118572320,gi 75775078                      | 47,334.80 | 100.00% | 13 | 17 | 21 | 0.16% | 41.90% | SQLIMQ 4.66<br>AEAEAE<br>AVR                                   | 1,661.82 |
| Control | 6011 | Flotillin 1                          | gi 115305033,gi 116004001,gi 118572320,gi 75775078                      | 47,334.80 | 100.00% | 13 | 17 | 21 | 0.16% | 41.90% | TEAEIAH 3.43<br>IALETLE<br>GHQR                                | 2,018.03 |
| Control | 6011 | Flotillin 1                          | gi 115305033,gi 116004001,gi 118572320,gi 75775078                      | 47,334.80 | 100.00% | 13 | 17 | 21 | 0.16% | 41.90% | VASSDL 3.11<br>VNMGIS<br>VVSYTL<br>K                           | 1,999.04 |
| Control | 6011 | Flotillin 1                          | gi 115305033,gi 116004001,gi 118572320,gi 75775078                      | 47,334.80 | 100.00% | 13 | 17 | 21 | 0.16% | 41.90% | VSAQYL 3.12<br>SEIEMA<br>K                                     | 1,484.73 |
| Control | 6011 | Flotillin 1                          | gi 115305033,gi 116004001,gi 118572320,gi 75775078                      | 47,334.80 | 100.00% | 13 | 17 | 21 | 0.16% | 41.90% | VTGEVL 3.03<br>DILSR                                           | 1,201.68 |
| Control | 6011 | similar to 40S ribosomal protein S18 | gi 28189422,gi 28189549,gi 28189799,gi 74268023,gi 75812924,gi 91207636 | 15,380.70 | 99.80%  | 2  | 2  | 2  | 0.02% | 16.00% | IAFAITAI 2.64<br>K                                             | 947.5925 |
| Control | 6011 | similar to 40S ribosomal protein S18 | gi 28189422,gi 28189549,gi 28189799,gi 74268023,gi 75812924,gi 91207636 | 15,380.70 | 99.80%  | 2  | 2  | 2  | 0.02% | 16.00% | RAGELT 3.74<br>EDEVER                                          | 1,403.68 |
| Control | 6011 | glutathione peroxidase 8             | gi 114052907,gi 122143886,gi 84708688                                   | 23,965.80 | 100.00% | 3  | 3  | 3  | 0.02% | 15.80% | ILGSEAE 3.79<br>PAFR                                           | 1,189.62 |

|         |      |                                                               |                                                     |           |         |   |    |    |       |        |                                                |      |          |
|---------|------|---------------------------------------------------------------|-----------------------------------------------------|-----------|---------|---|----|----|-------|--------|------------------------------------------------|------|----------|
| Control | 6011 | glutathione peroxidase 8                                      | gi 114052907,gi 122143886,gi 84708688               | 23,965.80 | 100.00% | 3 | 3  | 3  | 0.02% | 15.80% | INSFYTF EVK                                    | 2.18 | 1,247.63 |
| Control | 6011 | glutathione peroxidase 8                                      | gi 114052907,gi 122143886,gi 84708688               | 23,965.80 | 100.00% | 3 | 3  | 3  | 0.02% | 15.80% | NNFGVT FPIPHK                                  | 3.47 | 1,420.74 |
| Control | 6011 | ANXA6 protein                                                 | gi 154426044,gi 157151716,gi 160332337              | 75,893.80 | 99.80%  | 2 | 2  | 2  | 0.02% | 4.75%  | GLGTDE DTIIDIA HR                              | 2.1  | 1,738.90 |
| Control | 6011 | ANXA6 protein                                                 | gi 154426044,gi 157151716,gi 160332337              | 75,893.80 | 99.80%  | 2 | 2  | 2  | 0.02% | 4.75%  | GTVRPA GDFNPD ADAK                             | 3.31 | 1,630.78 |
| Control | 6011 | dolichyl-diphosphooligosaccharide-protein glycosyltransferase | gi 110665590,gi 151555878,gi 155371877,gi 215275740 | 48,774.90 | 100.00% | 8 | 10 | 25 | 0.20% | 30.50% | GFVLTF K                                       | 2.11 | 811.4713 |
| Control | 6011 | dolichyl-diphosphooligosaccharide-protein glycosyltransferase | gi 110665590,gi 151555878,gi 155371877,gi 215275740 | 48,774.90 | 100.00% | 8 | 10 | 25 | 0.20% | 30.50% | GVGMV ADPDNP LVLDTL GSSTSYS FFPDKPI TQYPHA VGK | 5.6  | 4,350.16 |
| Control | 6011 | dolichyl-diphosphooligosaccharide-protein glycosyltransferase | gi 110665590,gi 151555878,gi 155371877,gi 215275740 | 48,774.90 | 100.00% | 8 | 10 | 25 | 0.20% | 30.50% | LPDVYG VFQFK                                   | 3.49 | 1,312.69 |
| Control | 6011 | dolichyl-diphosphooligosaccharide-protein glycosyltransferase | gi 110665590,gi 151555878,gi 155371877,gi 215275740 | 48,774.90 | 100.00% | 8 | 10 | 25 | 0.20% | 30.50% | SSLNPIL FR                                     | 2.72 | 1,046.60 |
| Control | 6011 | dolichyl-diphosphooligosaccharide-protein glycosyltransferase | gi 110665590,gi 151555878,gi 155371877,gi 215275740 | 48,774.90 | 100.00% | 8 | 10 | 25 | 0.20% | 30.50% | TADDPS LSLIK                                   | 3.14 | 1,159.62 |
| Control | 6011 | dolichyl-diphosphooligosaccharide-protein glycosyltransferase | gi 110665590,gi 151555878,gi 155371877,gi 215275740 | 48,774.90 | 100.00% | 8 | 10 | 25 | 0.20% | 30.50% | TAVIDH HNYDVS DLGQHT LIVADTE NLLK              | 6.6  | 3,231.63 |
| Control | 6011 | dolichyl-diphosphooligosaccharide-protein glycosyltransferase | gi 110665590,gi 151555878,gi 155371877,gi 215275740 | 48,774.90 | 100.00% | 8 | 10 | 25 | 0.20% | 30.50% | TLVLLD NLNLR                                   | 4.3  | 1,283.77 |

|         |      |                                                                                                    |                                                                     |           |         |   |    |    |       |        |                                              |      |          |
|---------|------|----------------------------------------------------------------------------------------------------|---------------------------------------------------------------------|-----------|---------|---|----|----|-------|--------|----------------------------------------------|------|----------|
| Control | 6011 | dolichyl-<br>diphosph<br>ooligosac<br>charide-<br>protein<br>glycosyltr<br>ansferase               | gi 1106655<br>90,gi 15155<br>5878,gi 155<br>371877,gi 2<br>15275740 | 48,774.90 | 100.00% | 8 | 10 | 25 | 0.20% | 30.50% | YSQTGN<br>YELAVA<br>LSR                      | 4.25 | 1,671.83 |
| Control | 6011 | reticulon<br>4 isoform<br>2                                                                        | gi 1642593<br>54,gi 92096<br>636                                    | 40,940.20 | 100.00% | 3 | 5  | 8  | 0.06% | 10.30% | GPLPAA<br>PLAAPE<br>R                        | 3.46 | 1,259.71 |
| Control | 6011 | reticulon<br>4 isoform<br>2                                                                        | gi 1642593<br>54,gi 92096<br>636                                    | 40,940.20 | 100.00% | 3 | 5  | 8  | 0.06% | 10.30% | HQAQID<br>HYLGLA<br>NK                       | 4.77 | 1,607.83 |
| Control | 6011 | reticulon<br>4 isoform<br>2                                                                        | gi 1642593<br>54,gi 92096<br>636                                    | 40,940.20 | 100.00% | 3 | 5  | 8  | 0.06% | 10.30% | LFLVDD<br>LVDSLK                             | 4.03 | 1,376.77 |
| Control | 6011 | ADP-<br>ribosylati<br>on factor-<br>like 8B                                                        | gi 1140515<br>48,gi 86438<br>183,gi 9320<br>4537                    | 21,493.90 | 99.80%  | 2 | 3  | 4  | 0.03% | 21.50% | GVNAIV<br>YMIDAA<br>DREK                     | 3.92 | 1,780.89 |
| Control | 6011 | ADP-<br>ribosylati<br>on factor-<br>like 8B                                                        | gi 1140515<br>48,gi 86438<br>183,gi 9320<br>4537                    | 21,493.90 | 99.80%  | 2 | 3  | 4  | 0.03% | 21.50% | NELHNL<br>LDKPQL<br>QGIPVLV<br>LGNKR         | 4.45 | 2,708.56 |
| Control | 6011 | ATL3<br>protein                                                                                    | gi 1487454<br>56,gi 15470<br>7918                                   | 60,294.70 | 100.00% | 8 | 13 | 19 | 0.15% | 20.10% | ALASILL<br>QDHIR                             | 2.18 | 1,349.79 |
| Control | 6011 | ATL3<br>protein                                                                                    | gi 1487454<br>56,gi 15470<br>7918                                   | 60,294.70 | 100.00% | 8 | 13 | 19 | 0.15% | 20.10% | DIASEFK<br>EQLQTLI<br>LHVLNP<br>ANLMEK       | 4.06 | 3,010.59 |
| Control | 6011 | ATL3<br>protein                                                                                    | gi 1487454<br>56,gi 15470<br>7918                                   | 60,294.70 | 100.00% | 8 | 13 | 19 | 0.15% | 20.10% | IYQGED<br>LPHPK                              | 3.15 | 1,296.66 |
| Control | 6011 | ATL3<br>protein                                                                                    | gi 1487454<br>56,gi 15470<br>7918                                   | 60,294.70 | 100.00% | 8 | 13 | 19 | 0.15% | 20.10% | KVAVVL<br>MDTQGA<br>FDSQST<br>VK             | 4.75 | 2,140.10 |
| Control | 6011 | ATL3<br>protein                                                                                    | gi 1487454<br>56,gi 15470<br>7918                                   | 60,294.70 | 100.00% | 8 | 13 | 19 | 0.15% | 20.10% | LAMDEIF<br>QKPFQT<br>LMFLVR                  | 3.96 | 2,343.22 |
| Control | 6011 | ATL3<br>protein                                                                                    | gi 1487454<br>56,gi 15470<br>7918                                   | 60,294.70 | 100.00% | 8 | 13 | 19 | 0.15% | 20.10% | LKDIASE<br>FKEQLQ<br>TLILHVL<br>NPANLM<br>EK | 5.77 | 3,251.77 |
| Control | 6011 | ATL3<br>protein                                                                                    | gi 1487454<br>56,gi 15470<br>7918                                   | 60,294.70 | 100.00% | 8 | 13 | 19 | 0.15% | 20.10% | SMLQAT<br>AEANNL<br>AAAASA<br>K              | 5.63 | 1,848.91 |
| Control | 6011 | ATL3<br>protein                                                                                    | gi 1487454<br>56,gi 15470<br>7918                                   | 60,294.70 | 100.00% | 8 | 13 | 19 | 0.15% | 20.10% | VAVVLM<br>DTQGAF<br>DSQSTV<br>K              | 3.94 | 2,012.00 |
| Control | 6011 | RecName<br>:<br>Full=Glut<br>athione S-<br>transferas<br>e P;<br>AltName:<br>Full=GS<br>T class-pi | gi 121744,g<br>i 29135329,<br>gi 404,gi 74<br>268086                | 23,595.90 | 99.70%  | 2 | 2  | 2  | 0.02% | 15.70% | ALPQHL<br>KPFETLL<br>SQNK                    | 2.44 | 1,964.10 |

|         |      |                                                                                                                                                                                                                                                      |           |         |    |    |    |       |        |                                        |          |
|---------|------|------------------------------------------------------------------------------------------------------------------------------------------------------------------------------------------------------------------------------------------------------|-----------|---------|----|----|----|-------|--------|----------------------------------------|----------|
| Control | 6011 | RecName gi 121744,g<br>:<br>i 29135329,<br>Full=Glut gi 404,g 74<br>athione S-268086<br>transferas<br>e P;<br>AltName:<br>Full=GS<br>T class-pi                                                                                                      | 23,595.90 | 99.70%  | 2  | 2  | 2  | 0.02% | 15.70% | FQDGDL 2.73<br>TLYQSN<br>AILR          | 1,853.94 |
| Control | 6011 | Lamin gi 7435471 65,105.20 100.00% 7 7 7 0.05% 15.90% EAALST 2.79<br>A/C 9,g 774041 82 ALSEKR                                                                                                                                                        | 65,105.20 | 100.00% | 7  | 7  | 7  | 0.05% | 15.90% | EAALST 2.79<br>ALSEKR                  | 1,275.69 |
| Control | 6011 | Lamin gi 7435471 65,105.20 100.00% 7 7 7 0.05% 15.90% IRIDSLS 3.91<br>A/C 9,g 774041 82 AQLSQL<br>QK                                                                                                                                                 | 65,105.20 | 100.00% | 7  | 7  | 7  | 0.05% | 15.90% | IRIDSLS 3.91<br>AQLSQL<br>QK           | 1,699.97 |
| Control | 6011 | Lamin gi 7435471 65,105.20 100.00% 7 7 7 0.05% 15.90% LKDLEA 3.62<br>A/C 9,g 774041 82 LLNSK                                                                                                                                                         | 65,105.20 | 100.00% | 7  | 7  | 7  | 0.05% | 15.90% | LKDLEA 3.62<br>LLNSK                   | 1,243.73 |
| Control | 6011 | Lamin gi 7435471 65,105.20 100.00% 7 7 7 0.05% 15.90% LQEKED 4.2<br>A/C 9,g 774041 82 LQELND<br>R                                                                                                                                                    | 65,105.20 | 100.00% | 7  | 7  | 7  | 0.05% | 15.90% | LQEKED 4.2<br>LQELND<br>R              | 1,629.81 |
| Control | 6011 | Lamin gi 7435471 65,105.20 100.00% 7 7 7 0.05% 15.90% MQQLD 3.45<br>A/C 9,g 774041 82 EYQELL<br>DIK                                                                                                                                                  | 65,105.20 | 100.00% | 7  | 7  | 7  | 0.05% | 15.90% | MQQLD 3.45<br>EYQELL<br>DIK            | 1,909.92 |
| Control | 6011 | Lamin gi 7435471 65,105.20 100.00% 7 7 7 0.05% 15.90% NIYSEEL 2.94<br>A/C 9,g 774041 82 RETK                                                                                                                                                         | 65,105.20 | 100.00% | 7  | 7  | 7  | 0.05% | 15.90% | NIYSEEL 2.94<br>RETK                   | 1,381.70 |
| Control | 6011 | Lamin gi 7435471 65,105.20 100.00% 7 7 7 0.05% 15.90% TALINST 3.31<br>A/C 9,g 774041 82 GEEVAM<br>R                                                                                                                                                  | 65,105.20 | 100.00% | 7  | 7  | 7  | 0.05% | 15.90% | TALINST 3.31<br>GEEVAM<br>R            | 1,507.74 |
| Control | 6011 | serpin gi 1140515 46,490.00 100.00% 12 16 37 0.29% 36.80% AVAISLP 2.37<br>peptidase 05,g 11625 K<br>inhibitor, 6076,g 868<br>clade H 21084<br>(heat<br>shock<br>protein<br>47),<br>member<br>1,<br>(collagen<br>binding<br>protein 1)                | 46,490.00 | 100.00% | 12 | 16 | 37 | 0.29% | 36.80% | AVAISLP 2.37<br>K                      | 798.5084 |
| Control | 6011 | serpin gi 1140515 46,490.00 100.00% 12 16 37 0.29% 36.80% AVLSAE 6.3<br>peptidase 05,g 11625 QLRDDE<br>inhibitor, 6076,g 868 VHAGLG<br>clade H 21084 ELLR<br>(heat<br>shock<br>protein<br>47),<br>member<br>1,<br>(collagen<br>binding<br>protein 1) | 46,490.00 | 100.00% | 12 | 16 | 37 | 0.29% | 36.80% | AVLSAE 6.3<br>QLRDDE<br>VHAGLG<br>ELLR | 2,391.26 |

|         |      |                                                                                                                                         |                                                   |           |         |    |    |    |       |        |                                            |      |          |
|---------|------|-----------------------------------------------------------------------------------------------------------------------------------------|---------------------------------------------------|-----------|---------|----|----|----|-------|--------|--------------------------------------------|------|----------|
| Control | 6011 | serpin<br>peptidase<br>inhibitor,<br>clade H<br>(heat<br>shock<br>protein<br>47),<br>member<br>1,<br>(collagen<br>binding<br>protein 1) | gi 1140515<br>05,gi 11625<br>6076,gi 868<br>21084 | 46,490.00 | 100.00% | 12 | 16 | 37 | 0.29% | 36.80% | DQAVEN<br>ILLSPVV<br>VASSLG<br>LVSLGG<br>K | 6.35 | 2,565.45 |
| Control | 6011 | serpin<br>peptidase<br>inhibitor,<br>clade H<br>(heat<br>shock<br>protein<br>47),<br>member<br>1,<br>(collagen<br>binding<br>protein 1) | gi 1140515<br>05,gi 11625<br>6076,gi 868<br>21084 | 46,490.00 | 100.00% | 12 | 16 | 37 | 0.29% | 36.80% | DTQSGS<br>LLFIGR                           | 2.81 | 1,293.68 |
| Control | 6011 | serpin<br>peptidase<br>inhibitor,<br>clade H<br>(heat<br>shock<br>protein<br>47),<br>member<br>1,<br>(collagen<br>binding<br>protein 1) | gi 1140515<br>05,gi 11625<br>6076,gi 868<br>21084 | 46,490.00 | 100.00% | 12 | 16 | 37 | 0.29% | 36.80% | GVVEVT<br>HDLQK                            | 3.86 | 1,224.66 |
| Control | 6011 | serpin<br>peptidase<br>inhibitor,<br>clade H<br>(heat<br>shock<br>protein<br>47),<br>member<br>1,<br>(collagen<br>binding<br>protein 1) | gi 1140515<br>05,gi 11625<br>6076,gi 868<br>21084 | 46,490.00 | 100.00% | 12 | 16 | 37 | 0.29% | 36.80% | HLAGLG<br>LTEAIDK                          | 2.92 | 1,337.74 |

|         |      |                                                                                                                                         |                                                   |           |         |    |    |    |       |        |                          |      |          |
|---------|------|-----------------------------------------------------------------------------------------------------------------------------------------|---------------------------------------------------|-----------|---------|----|----|----|-------|--------|--------------------------|------|----------|
| Control | 6011 | serpin<br>peptidase<br>inhibitor,<br>clade H<br>(heat<br>shock<br>protein<br>47),<br>member<br>1,<br>(collagen<br>binding<br>protein 1) | gi 1140515<br>05,gi 11625<br>6076,gi 868<br>21084 | 46,490.00 | 100.00% | 12 | 16 | 37 | 0.29% | 36.80% | HLAGLG<br>LTEAIDK<br>NK  | 4.88 | 1,579.88 |
| Control | 6011 | serpin<br>peptidase<br>inhibitor,<br>clade H<br>(heat<br>shock<br>protein<br>47),<br>member<br>1,<br>(collagen<br>binding<br>protein 1) | gi 1140515<br>05,gi 11625<br>6076,gi 868<br>21084 | 46,490.00 | 100.00% | 12 | 16 | 37 | 0.29% | 36.80% | KAVAI<br>SLPK            | 2.62 | 926.6034 |
| Control | 6011 | serpin<br>peptidase<br>inhibitor,<br>clade H<br>(heat<br>shock<br>protein<br>47),<br>member<br>1,<br>(collagen<br>binding<br>protein 1) | gi 1140515<br>05,gi 11625<br>6076,gi 868<br>21084 | 46,490.00 | 100.00% | 12 | 16 | 37 | 0.29% | 36.80% | LFYADH<br>PFIFLVR        | 3.66 | 1,637.88 |
| Control | 6011 | serpin<br>peptidase<br>inhibitor,<br>clade H<br>(heat<br>shock<br>protein<br>47),<br>member<br>1,<br>(collagen<br>binding<br>protein 1) | gi 1140515<br>05,gi 11625<br>6076,gi 868<br>21084 | 46,490.00 | 100.00% | 12 | 16 | 37 | 0.29% | 36.80% | LSSLIIM<br>PHHVEP<br>LER | 3.24 | 2,000.10 |

|         |      |                                                                                                                                                                                                    |                                                   |            |         |    |    |    |       |        |                         |      |          |
|---------|------|----------------------------------------------------------------------------------------------------------------------------------------------------------------------------------------------------|---------------------------------------------------|------------|---------|----|----|----|-------|--------|-------------------------|------|----------|
| Control | 6011 | serpin<br>peptidase<br>inhibitor,<br>clade H<br>(heat<br>shock<br>protein<br>47),<br>member<br>1,<br>(collagen<br>binding<br>protein 1)                                                            | gi 1140515<br>05,gi 11625<br>6076,gi 868<br>21084 | 46,490.00  | 100.00% | 12 | 16 | 37 | 0.29% | 36.80% | LYGPSS<br>VSFAED<br>FVR | 4.83 | 1,673.82 |
| Control | 6011 | serpin<br>peptidase<br>inhibitor,<br>clade H<br>(heat<br>shock<br>protein<br>47),<br>member<br>1,<br>(collagen<br>binding<br>protein 1)                                                            | gi 1140515<br>05,gi 11625<br>6076,gi 868<br>21084 | 46,490.00  | 100.00% | 12 | 16 | 37 | 0.29% | 36.80% | SAGLAF<br>SLYQAM<br>AK  | 3.73 | 1,473.74 |
| Control | 6011 | PREDIC<br>TED:<br>similar to<br>Leucine-<br>rich PPR<br>motif-<br>containin<br>g protein,<br>mitochon<br>drial<br>precursor<br>(130 kDa<br>leucine-<br>rich<br>protein)<br>(LRP<br>130)<br>(GP130) | gi 1946714<br>07                                  | 153,330.30 | 100.00% | 3  | 3  | 3  | 0.02% | 2.59%  | LIEKGET<br>ELIQK        | 2.65 | 1,400.80 |
| Control | 6011 | PREDIC<br>TED:<br>similar to<br>Leucine-<br>rich PPR<br>motif-<br>containin<br>g protein,<br>mitochon<br>drial<br>precursor<br>(130 kDa<br>leucine-<br>rich<br>protein)<br>(LRP<br>130)<br>(GP130) | gi 1946714<br>07                                  | 153,330.30 | 100.00% | 3  | 3  | 3  | 0.02% | 2.59%  | TALDLD<br>QIPSR         | 2.71 | 1,228.65 |

|         |      |                                                                                                                                                    |            |            |         |   |   |   |       |        |                                            |          |
|---------|------|----------------------------------------------------------------------------------------------------------------------------------------------------|------------|------------|---------|---|---|---|-------|--------|--------------------------------------------|----------|
| Control | 6011 | PREDIC TED: 07<br>similar to Leucine-rich PPR motif- containin g protein, mitochondrial precursor (130 kDa leucine-rich protein) (LRP 130) (GP130) | gi 1946714 | 153,330.30 | 100.00% | 3 | 3 | 3 | 0.02% | 2.59%  | VIEGQLE 3.85<br>PALEK                      | 1,325.73 |
| Control | 6011 | PREDIC TED: 11<br>hypothetical protein                                                                                                             | gi 1946673 | 68,113.30  | 100.00% | 4 | 7 | 8 | 0.06% | 9.11%  | ELESQIS 3.59<br>ELQEDL<br>ESER             | 2,033.95 |
| Control | 6011 | PREDIC TED: 11<br>hypothetical protein                                                                                                             | gi 1946673 | 68,113.30  | 100.00% | 4 | 7 | 8 | 0.06% | 9.11%  | IRELESQ 5.82<br>ISELQED<br>LESER           | 2,303.14 |
| Control | 6011 | PREDIC TED: 11<br>hypothetical protein                                                                                                             | gi 1946673 | 68,113.30  | 100.00% | 4 | 7 | 8 | 0.06% | 9.11%  | RKLEGD 2.85<br>STDLND<br>QIAELQA<br>QIAELK | 2,798.45 |
| Control | 6011 | PREDIC TED: 11<br>hypothetical protein                                                                                                             | gi 1946673 | 68,113.30  | 100.00% | 4 | 7 | 8 | 0.06% | 9.11%  | XXXXXX 3.78<br>XXXXXX                      | 1,240.02 |
| Control | 6011 | PREDIC TED: 84<br>transmembrane emp24 protein transport domain containin g 4                                                                       | gi 1946663 | 37,465.50  | 100.00% | 4 | 6 | 7 | 0.05% | 14.90% | DKLTEL 3.25<br>QLR                         | 1,115.64 |
| Control | 6011 | PREDIC TED: 84<br>transmembrane emp24 protein transport domain containin g 4                                                                       | gi 1946663 | 37,465.50  | 100.00% | 4 | 6 | 7 | 0.05% | 14.90% | QKEVFL 3.04<br>PSTPGLG<br>MHVEVK<br>DPEGK  | 2,638.36 |
| Control | 6011 | PREDIC TED: 84<br>transmembrane emp24 protein transport domain containin g 4                                                                       | gi 1946663 | 37,465.50  | 100.00% | 4 | 6 | 7 | 0.05% | 14.90% | QLLDQV 3.7<br>EQIQK                        | 1,341.74 |



|         |      |                                                                                             |                                                           |            |         |    |    |    |       |        |                                            |      |          |
|---------|------|---------------------------------------------------------------------------------------------|-----------------------------------------------------------|------------|---------|----|----|----|-------|--------|--------------------------------------------|------|----------|
| Control | 6011 | PREDICTED:<br>transmembrane<br>emp24<br>protein<br>transport<br>domain<br>containing<br>g 4 | gi 194666384                                              | 37,465.50  | 100.00% | 4  | 6  | 7  | 0.05% | 14.90% | QLLDQV<br>EIQKE<br>QDYQR                   | 3.39 | 2,161.09 |
| Control | 6011 | NNT<br>protein                                                                              | gi 133777477,gi 163397,gi 163410,gi 172045566,gi 27806831 | 113,839.20 | 100.00% | 14 | 19 | 34 | 0.27% | 17.60% | AVVLAA<br>NHFR                             | 2.03 | 1,154.64 |
| Control | 6011 | NNT<br>protein                                                                              | gi 133777477,gi 163397,gi 163410,gi 172045566,gi 27806831 | 113,839.20 | 100.00% | 14 | 19 | 34 | 0.27% | 17.60% | FFTQQIT<br>AAGK                            | 2.64 | 1,140.60 |
| Control | 6011 | NNT<br>protein                                                                              | gi 133777477,gi 163397,gi 163410,gi 172045566,gi 27806831 | 113,839.20 | 100.00% | 14 | 19 | 34 | 0.27% | 17.60% | GITHIGY<br>TDLPSR                          | 4.46 | 1,429.74 |
| Control | 6011 | NNT<br>protein                                                                              | gi 133777477,gi 163397,gi 163410,gi 172045566,gi 27806831 | 113,839.20 | 100.00% | 14 | 19 | 34 | 0.27% | 17.60% | GTVVM<br>KDGQVI<br>FPATPK                  | 3.47 | 1,901.02 |
| Control | 6011 | NNT<br>protein                                                                              | gi 133777477,gi 163397,gi 163410,gi 172045566,gi 27806831 | 113,839.20 | 100.00% | 14 | 19 | 34 | 0.27% | 17.60% | ILIVGGG<br>VAGLAS<br>AGAAK                 | 5.04 | 1,524.91 |
| Control | 6011 | NNT<br>protein                                                                              | gi 133777477,gi 163397,gi 163410,gi 172045566,gi 27806831 | 113,839.20 | 100.00% | 14 | 19 | 34 | 0.27% | 17.60% | MATQAS<br>TLYSNNI<br>TK                    | 5.01 | 1,658.81 |
| Control | 6011 | NNT<br>protein                                                                              | gi 133777477,gi 163397,gi 163410,gi 172045566,gi 27806831 | 113,839.20 | 100.00% | 14 | 19 | 34 | 0.27% | 17.60% | QKTVAE<br>LEAEK                            | 3.47 | 1,245.67 |
| Control | 6011 | NNT<br>protein                                                                              | gi 133777477,gi 163397,gi 163410,gi 172045566,gi 27806831 | 113,839.20 | 100.00% | 14 | 19 | 34 | 0.27% | 17.60% | RVALSP<br>AGVQAL<br>VK                     | 2.67 | 1,408.86 |
| Control | 6011 | NNT<br>protein                                                                              | gi 133777477,gi 163397,gi 163410,gi 172045566,gi 27806831 | 113,839.20 | 100.00% | 14 | 19 | 34 | 0.27% | 17.60% | SLGAEPL<br>EVDLK                           | 3.08 | 1,270.69 |
| Control | 6011 | NNT<br>protein                                                                              | gi 133777477,gi 163397,gi 163410,gi 172045566,gi 27806831 | 113,839.20 | 100.00% | 14 | 19 | 34 | 0.27% | 17.60% | SLGVGY<br>AAVDNP<br>IFYKNT<br>AMLLGD<br>AK | 3.89 | 2,841.45 |

|         |      |                                                                              |                                                                               |            |         |    |    |    |       |        |                                                   |          |
|---------|------|------------------------------------------------------------------------------|-------------------------------------------------------------------------------|------------|---------|----|----|----|-------|--------|---------------------------------------------------|----------|
| Control | 6011 | NNT<br>protein                                                               | gi 1337774<br>77,gi 16339<br>7,gi 163410<br>.gi 1720455<br>66,gi 27806<br>831 | 113,839.20 | 100.00% | 14 | 19 | 34 | 0.27% | 17.60% | SLGVGY 2.65<br>AAVDNP<br>IFYKPNT<br>AMLLGD<br>AKK | 2,969.54 |
| Control | 6011 | NNT<br>protein                                                               | gi 1337774<br>77,gi 16339<br>7,gi 163410<br>.gi 1720455<br>66,gi 27806<br>831 | 113,839.20 | 100.00% | 14 | 19 | 34 | 0.27% | 17.60% | TSGTLIS 3.72<br>FIYPAQN<br>PDLLNK                 | 2,192.16 |
| Control | 6011 | NNT<br>protein                                                               | gi 1337774<br>77,gi 16339<br>7,gi 163410<br>.gi 1720455<br>66,gi 27806<br>831 | 113,839.20 | 100.00% | 14 | 19 | 34 | 0.27% | 17.60% | VALSPA 4.91<br>GVQALV<br>K                        | 1,252.76 |
| Control | 6011 | NNT<br>protein                                                               | gi 1337774<br>77,gi 16339<br>7,gi 163410<br>.gi 1720455<br>66,gi 27806<br>831 | 113,839.20 | 100.00% | 14 | 19 | 34 | 0.27% | 17.60% | VTIAQG 3.47<br>YDALSS<br>MANIAG<br>YK             | 2,089.03 |
| Control | 6011 | Transme<br>mbrane<br>emp24-<br>like<br>traffickin<br>g protein<br>10 (yeast) | gi 1337781<br>87,gi 59858<br>463,gi 6290<br>1402,gi 949<br>66895              | 24,810.80  | 100.00% | 9  | 15 | 29 | 0.23% | 32.40% | IPDQLVI 4.09<br>LDMK                              | 1,300.72 |
| Control | 6011 | Transme<br>mbrane<br>emp24-<br>like<br>traffickin<br>g protein<br>10 (yeast) | gi 1337781<br>87,gi 59858<br>463,gi 6290<br>1402,gi 949<br>66895              | 24,810.80  | 100.00% | 9  | 15 | 29 | 0.23% | 32.40% | IPDQLVI 2.12<br>LDMKHG<br>VEAK                    | 1,922.04 |
| Control | 6011 | Transme<br>mbrane<br>emp24-<br>like<br>traffickin<br>g protein<br>10 (yeast) | gi 1337781<br>87,gi 59858<br>463,gi 6290<br>1402,gi 949<br>66895              | 24,810.80  | 100.00% | 9  | 15 | 29 | 0.23% | 32.40% | ITDSAGH 1.94<br>ILYSK                             | 1,304.68 |
| Control | 6011 | Transme<br>mbrane<br>emp24-<br>like<br>traffickin<br>g protein<br>10 (yeast) | gi 1337781<br>87,gi 59858<br>463,gi 6290<br>1402,gi 949<br>66895              | 24,810.80  | 100.00% | 9  | 15 | 29 | 0.23% | 32.40% | ITDSAGH 4.83<br>ILYSKED<br>ATK                    | 1,848.93 |
| Control | 6011 | Transme<br>mbrane<br>emp24-<br>like<br>traffickin<br>g protein<br>10 (yeast) | gi 1337781<br>87,gi 59858<br>463,gi 6290<br>1402,gi 949<br>66895              | 24,810.80  | 100.00% | 9  | 15 | 29 | 0.23% | 32.40% | LEDLSES 4.14<br>IVNDFA<br>YMK                     | 1,889.88 |

|         |      |                                                          |                                                     |           |         |   |    |    |       |        |                                  |      |          |
|---------|------|----------------------------------------------------------|-----------------------------------------------------|-----------|---------|---|----|----|-------|--------|----------------------------------|------|----------|
| Control | 6011 | Transmembrane emp24-like traffickin g protein 10 (yeast) | gi 133778187,gi 59858463,gi 62901402,gi 94966895    | 24,810.80 | 100.00% | 9 | 15 | 29 | 0.23% | 32.40% | LKPLEV ELR                       | 3.89 | 1,096.67 |
| Control | 6011 | Transmembrane emp24-like traffickin g protein 10 (yeast) | gi 133778187,gi 59858463,gi 62901402,gi 94966895    | 24,810.80 | 100.00% | 9 | 15 | 29 | 0.23% | 32.40% | NYEEIA KVEK                      | 2.76 | 1,222.63 |
| Control | 6011 | Transmembrane emp24-like traffickin g protein 10 (yeast) | gi 133778187,gi 59858463,gi 62901402,gi 94966895    | 24,810.80 | 100.00% | 9 | 15 | 29 | 0.23% | 32.40% | RLEDLSE SIVNDFA YMK              | 5.77 | 2,045.99 |
| Control | 6011 | Transmembrane emp24-like traffickin g protein 10 (yeast) | gi 133778187,gi 59858463,gi 62901402,gi 94966895    | 24,810.80 | 100.00% | 9 | 15 | 29 | 0.23% | 32.40% | RLEDLSE SIVNDFA YMKK             | 5.16 | 2,174.08 |
| Control | 6011 | signal recognition particle receptor                     | gi 115497558,gi 122139924,gi 75773717               | 69,879.80 | 100.00% | 6 | 6  | 7  | 0.05% | 14.60% | DAAGIA MEAIAF AR                 | 3.4  | 1,422.70 |
| Control | 6011 | signal recognition particle receptor                     | gi 115497558,gi 122139924,gi 75773717               | 69,879.80 | 100.00% | 6 | 6  | 7  | 0.05% | 14.60% | LIDGIVL TK                       | 2.93 | 971.6138 |
| Control | 6011 | signal recognition particle receptor                     | gi 115497558,gi 122139924,gi 75773717               | 69,879.80 | 100.00% | 6 | 6  | 7  | 0.05% | 14.60% | LITVNTP DLVLFV GEALVG NEAVDQ LVK | 5.06 | 2,966.65 |
| Control | 6011 | signal recognition particle receptor                     | gi 115497558,gi 122139924,gi 75773717               | 69,879.80 | 100.00% | 6 | 6  | 7  | 0.05% | 14.60% | NQGFVDV VLVDTA GR                | 3.67 | 1,490.76 |
| Control | 6011 | signal recognition particle receptor                     | gi 115497558,gi 122139924,gi 75773717               | 69,879.80 | 100.00% | 6 | 6  | 7  | 0.05% | 14.60% | QALQES LVQILQP QR                | 4.2  | 1,750.98 |
| Control | 6011 | signal recognition particle receptor                     | gi 115497558,gi 122139924,gi 75773717               | 69,879.80 | 100.00% | 6 | 6  | 7  | 0.05% | 14.60% | VMGTFS TVTSTV K                  | 3.15 | 1,373.70 |
| Control | 6011 | CAPZA1 protein                                           | gi 133777466,gi 134085807,gi 152941212,gi 218563517 | 32,913.90 | 99.80%  | 2 | 2  | 2  | 0.02% | 9.79%  | FITHAPP GEFNEV FNDVR             | 3.98 | 2,089.01 |

|         |      |                                                                     |                                                     |            |         |   |   |   |       |       |                                 |      |          |
|---------|------|---------------------------------------------------------------------|-----------------------------------------------------|------------|---------|---|---|---|-------|-------|---------------------------------|------|----------|
| Control | 6011 | CAPZA1 protein                                                      | gi 133777466,gi 134085807,gi 152941212,gi 218563517 | 32,913.90  | 99.80%  | 2 | 2 | 2 | 0.02% | 9.79% | LLLND NLLR                      | 3.01 | 1,197.70 |
| Control | 6011 | solute carrier family 4, sodium bicarbonate cotransporter, member 7 | gi 219282724                                        | 135,822.00 | 100.00% | 5 | 5 | 5 | 0.04% | 7.64% | FLFLLG PAGK                     | 3.27 | 1,175.72 |
| Control | 6011 | solute carrier family 4, sodium bicarbonate cotransporter, member 7 | gi 219282724                                        | 135,822.00 | 100.00% | 5 | 5 | 5 | 0.04% | 7.64% | GPDEEA VVDLGG                   | 3.09 | 1,228.61 |
| Control | 6011 | solute carrier family 4, sodium bicarbonate cotransporter, member 7 | gi 219282724                                        | 135,822.00 | 100.00% | 5 | 5 | 5 | 0.04% | 7.64% | KIPSGAE ASNVLV GEVDFL ERPIAF VR | 3.11 | 3,026.67 |
| Control | 6011 | solute carrier family 4, sodium bicarbonate cotransporter, member 7 | gi 219282724                                        | 135,822.00 | 100.00% | 5 | 5 | 5 | 0.04% | 7.64% | LAPAVL LSGLTE VPVPR             | 3.96 | 1,833.08 |
| Control | 6011 | solute carrier family 4, sodium bicarbonate cotransporter, member 7 | gi 219282724                                        | 135,822.00 | 100.00% | 5 | 5 | 5 | 0.04% | 7.64% | MLQAGE DTVHLP FEGGSL QIPVK      | 4.3  | 2,595.35 |
| Control | 6011 | phosphatidylinositol glycan anchor biosynthesis, class K            | gi 118151384,gi 119889964,gi 75775270,gi 91206763   | 45,155.70  | 99.90%  | 2 | 2 | 2 | 0.02% | 7.09% | NMELNV YGDDVE VDYL              | 2.74 | 1,946.84 |
| Control | 6011 | phosphatidylinositol glycan anchor biosynthesis, class K            | gi 118151384,gi 119889964,gi 75775270,gi 91206763   | 45,155.70  | 99.90%  | 2 | 2 | 2 | 0.02% | 7.09% | NVLITDF FGSVR                   | 2.89 | 1,367.73 |

|         |      |                                                |                                                      |           |         |   |   |   |       |        |                                                  |      |          |
|---------|------|------------------------------------------------|------------------------------------------------------|-----------|---------|---|---|---|-------|--------|--------------------------------------------------|------|----------|
| Control | 6011 | Stromal interaction molecule 1                 | gi 154426132,gi 61555683,gi 75057528,gi 78369570     | 77,134.40 | 100.00% | 6 | 6 | 7 | 0.05% | 13.00% | AAAEEED<br>NGSIGEE<br>TDSSPGR                    | 3.76 | 1,991.84 |
| Control | 6011 | Stromal interaction molecule 1                 | gi 154426132,gi 61555683,gi 75057528,gi 78369570     | 77,134.40 | 100.00% | 6 | 6 | 7 | 0.05% | 13.00% | DLTHSD<br>SESSLH<br>MSDR                         | 3.84 | 1,832.77 |
| Control | 6011 | Stromal interaction molecule 1                 | gi 154426132,gi 61555683,gi 75057528,gi 78369570     | 77,134.40 | 100.00% | 6 | 6 | 7 | 0.05% | 13.00% | KAAAEE<br>DNGSIGE<br>ETDSSPGR                    | 4.19 | 2,119.94 |
| Control | 6011 | Stromal interaction molecule 1                 | gi 154426132,gi 61555683,gi 75057528,gi 78369570     | 77,134.40 | 100.00% | 6 | 6 | 7 | 0.05% | 13.00% | LMDDDA<br>NGDVVDV<br>EESDEFL<br>REDLNY<br>HDPTVK | 3.33 | 3,611.56 |
| Control | 6011 | Stromal interaction molecule 1                 | gi 154426132,gi 61555683,gi 75057528,gi 78369570     | 77,134.40 | 100.00% | 6 | 6 | 7 | 0.05% | 13.00% | QALSEV<br>TAALR                                  | 2.83 | 1,158.65 |
| Control | 6011 | Stromal interaction molecule 1                 | gi 154426132,gi 61555683,gi 75057528,gi 78369570     | 77,134.40 | 100.00% | 6 | 6 | 7 | 0.05% | 13.00% | YAEEL<br>EQVR                                    | 3.14 | 1,265.60 |
| Control | 6011 | emerin                                         | gi 37781186,gi 42733600,gi 74356375                  | 29,454.80 | 100.00% | 5 | 6 | 6 | 0.05% | 23.00% | FSDLDS<br>ASVDS<br>MYDLPK                        | 2.9  | 2,020.87 |
| Control | 6011 | emerin                                         | gi 37781186,gi 42733600,gi 74356375                  | 29,454.80 | 100.00% | 5 | 6 | 6 | 0.05% | 23.00% | FSDLDS<br>ASVDS<br>MYDLPK<br>KEDALL<br>YQSK      | 4    | 3,196.49 |
| Control | 6011 | emerin                                         | gi 37781186,gi 42733600,gi 74356375                  | 29,454.80 | 100.00% | 5 | 6 | 6 | 0.05% | 23.00% | GFRQPS<br>ASLSDA<br>DPFHR                        | 3.56 | 1,887.91 |
| Control | 6011 | emerin                                         | gi 37781186,gi 42733600,gi 74356375                  | 29,454.80 | 100.00% | 5 | 6 | 6 | 0.05% | 23.00% | LSPSS<br>ASSFSYR                                 | 1.99 | 1,472.70 |
| Control | 6011 | emerin                                         | gi 37781186,gi 42733600,gi 74356375                  | 29,454.80 | 100.00% | 5 | 6 | 6 | 0.05% | 23.00% | RLSPSS<br>SASSFSYR                               | 3.25 | 1,628.80 |
| Control | 6011 | NADH dehydrogenase (ubiquinone) 42 kDa subunit | gi 228,gi 45430053,gi 464255,gi 74268236,gi 95768472 | 41,642.50 | 99.80%  | 2 | 2 | 2 | 0.02% | 5.15%  | FLNYFA<br>NIR                                    | 3.05 | 1,157.61 |
| Control | 6011 | NADH dehydrogenase (ubiquinone) 42 kDa subunit | gi 228,gi 45430053,gi 464255,gi 74268236,gi 95768472 | 41,642.50 | 99.80%  | 2 | 2 | 2 | 0.02% | 5.15%  | IPQAIQ<br>VSK                                    | 2.33 | 1,054.63 |

|         |      |                                                                                   |                      |         |    |    |    |       |        |                              |          |
|---------|------|-----------------------------------------------------------------------------------|----------------------|---------|----|----|----|-------|--------|------------------------------|----------|
| Control | 6011 | RecName gi 1088609 : 19,gi 74354 Full=Ras-082,gi 7804 related 5539 protein Rab-7a | 23,526.10            | 100.00% | 6  | 6  | 11 | 0.09% | 39.60% | ATIGADF 2.63 LTK             | 1,036.57 |
| Control | 6011 | RecName gi 1088609 : 19,gi 74354 Full=Ras-082,gi 7804 related 5539 protein Rab-7a | 23,526.10            | 100.00% | 6  | 6  | 11 | 0.09% | 39.60% | DPENFPF 3.86 VVLGNK          | 1,475.75 |
| Control | 6011 | RecName gi 1088609 : 19,gi 74354 Full=Ras-082,gi 7804 related 5539 protein Rab-7a | 23,526.10            | 100.00% | 6  | 6  | 11 | 0.09% | 39.60% | FQSLGV 3.03 AFYR             | 1,187.62 |
| Control | 6011 | RecName gi 1088609 : 19,gi 74354 Full=Ras-082,gi 7804 related 5539 protein Rab-7a | 23,526.10            | 100.00% | 6  | 6  | 11 | 0.09% | 39.60% | GADCCV 2.96 LVFDVT APNTFK    | 1,899.90 |
| Control | 6011 | RecName gi 1088609 : 19,gi 74354 Full=Ras-082,gi 7804 related 5539 protein Rab-7a | 23,526.10            | 100.00% | 6  | 6  | 11 | 0.09% | 39.60% | NALKQE 4.21 TEVELY NEFPEPI K | 2,391.21 |
| Control | 6011 | RecName gi 1088609 : 19,gi 74354 Full=Ras-082,gi 7804 related 5539 protein Rab-7a | 23,526.10            | 100.00% | 6  | 6  | 11 | 0.09% | 39.60% | VILGDS 2.66 GVGK             | 1,057.63 |
| Control | 6011 | heat shock 70kDa protein 8                                                        | gi 1462317 71,224.20 | 100.00% | 14 | 17 | 21 | 0.16% | 28.80% | ARFEEL 3.95 NADLFR           | 1,480.75 |
| Control | 6011 | heat shock 70kDa protein 8                                                        | gi 1462317 71,224.20 | 100.00% | 14 | 17 | 21 | 0.16% | 28.80% | DAGTIA 3.63 GLNVLR           | 1,199.67 |
| Control | 6011 | heat shock 70kDa protein 8                                                        | gi 1462317 71,224.20 | 100.00% | 14 | 17 | 21 | 0.16% | 28.80% | FEELNA 2.36 DLFR             | 1,253.62 |
| Control | 6011 | heat shock 70kDa protein 8                                                        | gi 1462317 71,224.20 | 100.00% | 14 | 17 | 21 | 0.16% | 28.80% | IINEPTA 4.4 AAIAYG LDK       | 1,659.90 |
| Control | 6011 | heat shock 70kDa protein 8                                                        | gi 1462317 71,224.20 | 100.00% | 14 | 17 | 21 | 0.16% | 28.80% | IINEPTA 2.86 AAIAYG LDKK     | 1,787.99 |
| Control | 6011 | heat shock 70kDa protein 8                                                        | gi 1462317 71,224.20 | 100.00% | 14 | 17 | 21 | 0.16% | 28.80% | LDKSQIH 4.06 DIVLVG GSTR     | 1,838.01 |
| Control | 6011 | heat shock 70kDa protein 8                                                        | gi 1462317 71,224.20 | 100.00% | 14 | 17 | 21 | 0.16% | 28.80% | LLQDFD 2.35 NGK              | 1,081.57 |
| Control | 6011 | heat shock 70kDa protein 8                                                        | gi 1462317 71,224.20 | 100.00% | 14 | 17 | 21 | 0.16% | 28.80% | MVNHFI 2.26 AEFK             | 1,251.62 |

|         |      |                                                                        |                                           |           |         |    |    |    |       |        |                                         |      |          |
|---------|------|------------------------------------------------------------------------|-------------------------------------------|-----------|---------|----|----|----|-------|--------|-----------------------------------------|------|----------|
| Control | 6011 | heat shock 70kDa protein 8                                             | gi 1462317 04                             | 71,224.20 | 100.00% | 14 | 17 | 21 | 0.16% | 28.80% | NQVAM NPTNTV FDAK                       | 3.98 | 1,665.79 |
| Control | 6011 | heat shock 70kDa protein 8                                             | gi 1462317 04                             | 71,224.20 | 100.00% | 14 | 17 | 21 | 0.16% | 28.80% | NSLESY AFNMK                            | 2.98 | 1,319.59 |
| Control | 6011 | heat shock 70kDa protein 8                                             | gi 1462317 04                             | 71,224.20 | 100.00% | 14 | 17 | 21 | 0.16% | 28.80% | SFYPEEV SSMVLT K                        | 2.93 | 1,632.78 |
| Control | 6011 | heat shock 70kDa protein 8                                             | gi 1462317 04                             | 71,224.20 | 100.00% | 14 | 17 | 21 | 0.16% | 28.80% | SINPDEA VAYGAA VQAAILS GDK              | 3.29 | 2,260.15 |
| Control | 6011 | heat shock 70kDa protein 8                                             | gi 1462317 04                             | 71,224.20 | 100.00% | 14 | 17 | 21 | 0.16% | 28.80% | STAGDT HLGGED FDNR                      | 3.25 | 1,691.73 |
| Control | 6011 | heat shock 70kDa protein 8                                             | gi 1462317 04                             | 71,224.20 | 100.00% | 14 | 17 | 21 | 0.16% | 28.80% | TTPSYV AFTDTE R                         | 3.3  | 1,487.70 |
| Control | 6011 | heat shock 70kDa protein 8                                             | gi 1462317 04                             | 71,224.20 | 100.00% | 14 | 17 | 21 | 0.16% | 28.80% | TVTNAV VTPPAY FNDSQR                    | 3.34 | 1,982.00 |
| Control | 6011 | Solute carrier family 25 (mitochondrial carrier: glutamate), member 22 | gi 1153053 83,gi 11549 5639,gi 122 132287 | 34,514.50 | 100.00% | 5  | 5  | 5  | 0.04% | 26.10% | DVPFSIV YFPLFA NLNELG R                 | 3.39 | 2,311.21 |
| Control | 6011 | Solute carrier family 25 (mitochondrial carrier: glutamate), member 22 | gi 1153053 83,gi 11549 5639,gi 122 132287 | 34,514.50 | 100.00% | 5  | 5  | 5  | 0.04% | 26.10% | GAAVNL TLVTPE K                         | 3.42 | 1,312.75 |
| Control | 6011 | Solute carrier family 25 (mitochondrial carrier: glutamate), member 22 | gi 1153053 83,gi 11549 5639,gi 122 132287 | 34,514.50 | 100.00% | 5  | 5  | 5  | 0.04% | 26.10% | KILSAQA QLSGQG SAQPSV EAPATP RPTATQ LTR | 5.24 | 3,460.85 |
| Control | 6011 | Solute carrier family 25 (mitochondrial carrier: glutamate), member 22 | gi 1153053 83,gi 11549 5639,gi 122 132287 | 34,514.50 | 100.00% | 5  | 5  | 5  | 0.04% | 26.10% | LAANDF FR                               | 2.51 | 953.4839 |

|         |      |                                                                        |                                                     |           |         |    |    |     |       |        |                           |      |          |
|---------|------|------------------------------------------------------------------------|-----------------------------------------------------|-----------|---------|----|----|-----|-------|--------|---------------------------|------|----------|
| Control | 6011 | Solute carrier family 25 (mitochondrial carrier: glutamate), member 22 | gi 115305383,gi 115495639,gi 122132287              | 34,514.50 | 100.00% | 5  | 5  | 5   | 0.04% | 26.10% | SEGYFG MYR                | 2.66 | 1,125.47 |
| Control | 6011 | chaperonin containing TCP1, subunit 7                                  | gi 114051425,gi 115305840,gi 84708838               | 59,426.00 | 99.80%  | 2  | 2  | 2   | 0.02% | 5.89%  | SLHDAI MIVR               | 2.35 | 1,170.63 |
| Control | 6011 | chaperonin containing TCP1, subunit 7                                  | gi 114051425,gi 115305840,gi 84708838               | 59,426.00 | 99.80%  | 2  | 2  | 2   | 0.02% | 5.89%  | SQDAEV GDGTTS VTLLAA EFLK | 4.17 | 2,252.13 |
| Control | 6011 | ras homolog gene family, member G                                      | gi 122692461,gi 92096969                            | 21,261.90 | 100.00% | 3  | 4  | 4   | 0.03% | 19.90% | EQGQAPI TPQQGQ ALAK       | 3.98 | 1,764.92 |
| Control | 6011 | ras homolog gene family, member G                                      | gi 122692461,gi 92096969                            | 21,261.90 | 100.00% | 3  | 4  | 4   | 0.03% | 19.90% | EYIPTVF DNYSAQ SAVDGR     | 2.99 | 2,131.99 |
| Control | 6011 | ras homolog gene family, member G                                      | gi 122692461,gi 92096969                            | 21,261.90 | 100.00% | 3  | 4  | 4   | 0.03% | 19.90% | LKEQGQ APITPQQ GQALAK     | 4.64 | 2,006.10 |
| Control | 6011 | Cofilin 2 (muscle)                                                     | gi 109939921,gi 115495595,gi 118572238,gi 164623755 | 18,719.30 | 99.80%  | 2  | 2  | 2   | 0.02% | 18.70% | QILVGDI GDTVED PYTSFV K   | 2.99 | 2,196.11 |
| Control | 6011 | Cofilin 2 (muscle)                                                     | gi 109939921,gi 115495595,gi 118572238,gi 164623755 | 18,719.30 | 99.80%  | 2  | 2  | 2   | 0.02% | 18.70% | YALYDA TYETK              | 2.53 | 1,337.63 |
| Control | 6011 | solute carrier family 25, member A6                                    | gi 119936593,gi 151557097,gi 32189336               | 32,860.40 | 100.00% | 10 | 14 | 125 | 0.98% | 33.60% | AAAYFGI YDTAK             | 4.01 | 1,219.60 |
| Control | 6011 | solute carrier family 25, member A6                                    | gi 119936593,gi 151557097,gi 32189336               | 32,860.40 | 100.00% | 10 | 14 | 125 | 0.98% | 33.60% | DFLAGGI AAAISK            | 5.37 | 1,233.68 |
| Control | 6011 | solute carrier family 25, member A6                                    | gi 119936593,gi 151557097,gi 32189336               | 32,860.40 | 100.00% | 10 | 14 | 125 | 0.98% | 33.60% | EQGVLS FWR                | 2.58 | 1,121.57 |



|         |      |                                                  |                                       |            |         |    |    |     |       |        |                                       |      |          |
|---------|------|--------------------------------------------------|---------------------------------------|------------|---------|----|----|-----|-------|--------|---------------------------------------|------|----------|
| Control | 6011 | solute carrier family 25, member A6              | gi 119936593,gi 151557097,gi 32189336 | 32,860.40  | 100.00% | 10 | 14 | 125 | 0.98% | 33.60% | GLYQGF NVSVQG IIIYR                   | 2.63 | 1,927.04 |
| Control | 6011 | solute carrier family 25, member A6              | gi 119936593,gi 151557097,gi 32189336 | 32,860.40  | 100.00% | 10 | 14 | 125 | 0.98% | 33.60% | GMGGAF VLVLYD ELK                     | 4.27 | 1,627.84 |
| Control | 6011 | solute carrier family 25, member A6              | gi 119936593,gi 151557097,gi 32189336 | 32,860.40  | 100.00% | 10 | 14 | 125 | 0.98% | 33.60% | GMGGAF VLVLYD ELKK                    | 3.05 | 1,755.94 |
| Control | 6011 | solute carrier family 25, member A6              | gi 119936593,gi 151557097,gi 32189336 | 32,860.40  | 100.00% | 10 | 14 | 125 | 0.98% | 33.60% | LLLQVQ HASK                           | 2.8  | 1,136.68 |
| Control | 6011 | solute carrier family 25, member A6              | gi 119936593,gi 151557097,gi 32189336 | 32,860.40  | 100.00% | 10 | 14 | 125 | 0.98% | 33.60% | QIFLGGV DKR                           | 1.84 | 1,132.65 |
| Control | 6011 | solute carrier family 25, member A6              | gi 119936593,gi 151557097,gi 32189336 | 32,860.40  | 100.00% | 10 | 14 | 125 | 0.98% | 33.60% | YFPTQA LNFAFK                         | 3.99 | 1,446.74 |
| Control | 6011 | solute carrier family 25, member A6              | gi 119936593,gi 151557097,gi 32189336 | 32,860.40  | 100.00% | 10 | 14 | 125 | 0.98% | 33.60% | YFPTQA LNFAFK DK                      | 3.69 | 1,689.86 |
| Control | 6011 | PREDICTED: insulin-like growth factor 1 receptor | gi 119913553                          | 135,693.80 | 100.00% | 3  | 3  | 3   | 0.02% | 5.23%  | ELGQGS FGMVYE GVAK                    | 2.66 | 1,687.80 |
| Control | 6011 | PREDICTED: insulin-like growth factor 1 receptor | gi 119913553                          | 135,693.80 | 100.00% | 3  | 3  | 3   | 0.02% | 5.23%  | TEAEKQ AEKEEA EYR                     | 2.73 | 1,810.85 |
| Control | 6011 | PREDICTED: insulin-like growth factor 1 receptor | gi 119913553                          | 135,693.80 | 100.00% | 3  | 3  | 3   | 0.02% | 5.23%  | VAGGLG VPGGGP SAQRPH TLPVPT VCPSAC GK | 2.91 | 2,967.53 |

|         |      |                                                                                                         |                  |            |         |    |    |    |       |        |                                                       |      |          |
|---------|------|---------------------------------------------------------------------------------------------------------|------------------|------------|---------|----|----|----|-------|--------|-------------------------------------------------------|------|----------|
| Control | 6011 | PREDIC<br>TED:<br>similar to<br>filamin<br>B, beta<br>(actin<br>binding<br>protein<br>278)<br>isoform 7 | gi 1946772<br>96 | 277,977.20 | 100.00% | 22 | 24 | 26 | 0.20% | 14.50% | APLNVQ<br>FSSPGPG<br>DAVK                             | 4.23 | 1,683.87 |
| Control | 6011 | PREDIC<br>TED:<br>similar to<br>filamin<br>B, beta<br>(actin<br>binding<br>protein<br>278)<br>isoform 7 | gi 1946772<br>96 | 277,977.20 | 100.00% | 22 | 24 | 26 | 0.20% | 14.50% | FADEHV<br>PGSPFTV<br>K                                | 3.49 | 1,530.76 |
| Control | 6011 | PREDIC<br>TED:<br>similar to<br>filamin<br>B, beta<br>(actin<br>binding<br>protein<br>278)<br>isoform 7 | gi 1946772<br>96 | 277,977.20 | 100.00% | 22 | 24 | 26 | 0.20% | 14.50% | FNDEHIP<br>ESPYVV<br>PVIAPSD<br>DAR                   | 3.1  | 2,567.24 |
| Control | 6011 | PREDIC<br>TED:<br>similar to<br>filamin<br>B, beta<br>(actin<br>binding<br>protein<br>278)<br>isoform 7 | gi 1946772<br>96 | 277,977.20 | 100.00% | 22 | 24 | 26 | 0.20% | 14.50% | GAGIGG<br>LGITVEG<br>PSESK                            | 4.48 | 1,628.85 |
| Control | 6011 | PREDIC<br>TED:<br>similar to<br>filamin<br>B, beta<br>(actin<br>binding<br>protein<br>278)<br>isoform 7 | gi 1946772<br>96 | 277,977.20 | 100.00% | 22 | 24 | 26 | 0.20% | 14.50% | GFQDGV<br>YAFEYY<br>PSTQ GK                           | 3.17 | 2,056.93 |
| Control | 6011 | PREDIC<br>TED:<br>similar to<br>filamin<br>B, beta<br>(actin<br>binding<br>protein<br>278)<br>isoform 7 | gi 1946772<br>96 | 277,977.20 | 100.00% | 22 | 24 | 26 | 0.20% | 14.50% | GLVEPV<br>NVVDNG<br>DGTHTV<br>TYTPSQ<br>EGPYMV<br>SVK | 7.1  | 3,505.68 |
| Control | 6011 | PREDIC<br>TED:<br>similar to<br>filamin<br>B, beta<br>(actin<br>binding<br>protein<br>278)<br>isoform 7 | gi 1946772<br>96 | 277,977.20 | 100.00% | 22 | 24 | 26 | 0.20% | 14.50% | IVGPGLG<br>SGVR                                       | 2.99 | 1,011.59 |

|         |      |                                                                                                         |                  |            |         |    |    |    |       |        |                         |      |          |
|---------|------|---------------------------------------------------------------------------------------------------------|------------------|------------|---------|----|----|----|-------|--------|-------------------------|------|----------|
| Control | 6011 | PREDIC<br>TED:<br>similar to<br>filamin<br>B, beta<br>(actin<br>binding<br>protein<br>278)<br>isoform 7 | gi 1946772<br>96 | 277,977.20 | 100.00% | 22 | 24 | 26 | 0.20% | 14.50% | LDVTILS<br>PSR          | 3.21 | 1,100.63 |
| Control | 6011 | PREDIC<br>TED:<br>similar to<br>filamin<br>B, beta<br>(actin<br>binding<br>protein<br>278)<br>isoform 7 | gi 1946772<br>96 | 277,977.20 | 100.00% | 22 | 24 | 26 | 0.20% | 14.50% | LIALLEV<br>LSQK         | 2.5  | 1,226.77 |
| Control | 6011 | PREDIC<br>TED:<br>similar to<br>filamin<br>B, beta<br>(actin<br>binding<br>protein<br>278)<br>isoform 7 | gi 1946772<br>96 | 277,977.20 | 100.00% | 22 | 24 | 26 | 0.20% | 14.50% | SPFEVQ<br>VGPEAG<br>MQK | 4.91 | 1,619.77 |
| Control | 6011 | PREDIC<br>TED:<br>similar to<br>filamin<br>B, beta<br>(actin<br>binding<br>protein<br>278)<br>isoform 7 | gi 1946772<br>96 | 277,977.20 | 100.00% | 22 | 24 | 26 | 0.20% | 14.50% | SPFTVG<br>VAAPLD<br>LSR | 4.13 | 1,529.83 |
| Control | 6011 | PREDIC<br>TED:<br>similar to<br>filamin<br>B, beta<br>(actin<br>binding<br>protein<br>278)<br>isoform 7 | gi 1946772<br>96 | 277,977.20 | 100.00% | 22 | 24 | 26 | 0.20% | 14.50% | VLFASQ<br>EIPSPF<br>R   | 3.9  | 1,591.85 |
| Control | 6011 | PREDIC<br>TED:<br>similar to<br>filamin<br>B, beta<br>(actin<br>binding<br>protein<br>278)<br>isoform 7 | gi 1946772<br>96 | 277,977.20 | 100.00% | 22 | 24 | 26 | 0.20% | 14.50% | VNQPAS<br>FAIR          | 3.11 | 1,102.60 |
| Control | 6011 | PREDIC<br>TED:<br>similar to<br>filamin<br>B, beta<br>(actin<br>binding<br>protein<br>278)<br>isoform 7 | gi 1946772<br>96 | 277,977.20 | 100.00% | 22 | 24 | 26 | 0.20% | 14.50% | VSFAGD<br>TIPK          | 2.54 | 1,034.55 |

|         |      |                                                                                                         |                  |            |         |    |    |    |       |        |                                                           |      |          |
|---------|------|---------------------------------------------------------------------------------------------------------|------------------|------------|---------|----|----|----|-------|--------|-----------------------------------------------------------|------|----------|
| Control | 6011 | PREDIC<br>TED:<br>similar to<br>filamin<br>B, beta<br>(actin<br>binding<br>protein<br>278)<br>isoform 7 | gi 1946772<br>96 | 277,977.20 | 100.00% | 22 | 24 | 26 | 0.20% | 14.50% | VSYFPT<br>VPGVYI<br>VSTK                                  | 3    | 1,756.95 |
| Control | 6011 | PREDIC<br>TED:<br>similar to<br>filamin<br>B, beta<br>(actin<br>binding<br>protein<br>278)<br>isoform 7 | gi 1946772<br>96 | 277,977.20 | 100.00% | 22 | 24 | 26 | 0.20% | 14.50% | VTASGP<br>GLSTYG<br>VPASLP<br>VEFAIDA<br>R                | 3.56 | 2,575.34 |
| Control | 6011 | PREDIC<br>TED:<br>similar to<br>filamin<br>B, beta<br>(actin<br>binding<br>protein<br>278)<br>isoform 7 | gi 1946772<br>96 | 277,977.20 | 100.00% | 22 | 24 | 26 | 0.20% | 14.50% | VTVLFA<br>GQHISK                                          | 3.33 | 1,299.74 |
| Control | 6011 | PREDIC<br>TED:<br>similar to<br>filamin<br>B, beta<br>(actin<br>binding<br>protein<br>278)<br>isoform 7 | gi 1946772<br>96 | 277,977.20 | 100.00% | 22 | 24 | 26 | 0.20% | 14.50% | YGGELV<br>PHFPTR                                          | 2.81 | 1,372.70 |
| Control | 6011 | PREDIC<br>TED:<br>similar to<br>filamin<br>B, beta<br>(actin<br>binding<br>protein<br>278)<br>isoform 7 | gi 1946772<br>96 | 277,977.20 | 100.00% | 22 | 24 | 26 | 0.20% | 14.50% | YMGSHI<br>PESPLQF<br>YVNYPN<br>SGSVSA<br>YGPGLV<br>YGVANK | 5.59 | 3,978.90 |
| Control | 6011 | PREDIC<br>TED:<br>similar to<br>filamin<br>B, beta<br>(actin<br>binding<br>protein<br>278)<br>isoform 7 | gi 1946772<br>96 | 277,977.20 | 100.00% | 22 | 24 | 26 | 0.20% | 14.50% | YMIGVT<br>YGGDDI<br>PLSPYR                                | 3.64 | 2,032.97 |
| Control | 6011 | PREDIC<br>TED:<br>similar to<br>filamin<br>B, beta<br>(actin<br>binding<br>protein<br>278)<br>isoform 7 | gi 1946772<br>96 | 277,977.20 | 100.00% | 22 | 24 | 26 | 0.20% | 14.50% | YNDKHI<br>PGSPFTA<br>K                                    | 2.96 | 1,574.80 |

|         |      |                                                                                                     |                                                   |            |         |    |    |    |       |        |                                    |      |          |
|---------|------|-----------------------------------------------------------------------------------------------------|---------------------------------------------------|------------|---------|----|----|----|-------|--------|------------------------------------|------|----------|
| Control | 6011 | PREDICTED:<br>similar to<br>filamin<br>B, beta<br>(actin<br>binding<br>protein<br>278)<br>isoform 7 | gi 1946772<br>96                                  | 277,977.20 | 100.00% | 22 | 24 | 26 | 0.20% | 14.50% | YTPTQQ<br>GNMQVL<br>VTYGGD<br>PIPK | 3.52 | 2,423.19 |
| Control | 6011 | septin 2                                                                                            | gi 1140529<br>05,gi 12206<br>9932,gi 847<br>08845 | 41,554.10  | 99.80%  | 2  | 2  | 2  | 0.02% | 8.86%  | KVENED<br>MNKDQI<br>LLEK           | 3.41 | 1,961.99 |
| Control | 6011 | septin 2                                                                                            | gi 1140529<br>05,gi 12206<br>9932,gi 847<br>08845 | 41,554.10  | 99.80%  | 2  | 2  | 2  | 0.02% | 8.86%  | STLNSL<br>FLTDLYP<br>ER            | 3.2  | 1,882.00 |
| Control | 6011 | plasma<br>membran<br>e calcium-55<br>transporti<br>ng<br>ATPase                                     | gi 1458276<br>2,gi 278072                         | 134,738.10 | 100.00% | 2  | 2  | 2  | 0.02% | 9.84%  | ADVGFA<br>MGIAGT<br>DVAK           | 4.08 | 1,538.75 |
| Control | 6011 | plasma<br>membran<br>e calcium-55<br>transporti<br>ng<br>ATPase                                     | gi 1458276<br>2,gi 278072                         | 134,738.10 | 100.00% | 2  | 2  | 2  | 0.02% | 9.84%  | EANHDG<br>DFGITLA<br>ELR           | 3.55 | 1,757.85 |
| Control | 6011 | plasma<br>membran<br>e calcium-55<br>transporti<br>ng<br>ATPase                                     | gi 1458276<br>2,gi 278072                         | 134,738.10 | 100.00% | 2  | 2  | 2  | 0.02% | 9.84%  | EASDIL<br>TDDNFT<br>SIVK           | 2.96 | 1,880.95 |
| Control | 6011 | plasma<br>membran<br>e calcium-55<br>transporti<br>ng<br>ATPase                                     | gi 1458276<br>2,gi 278072                         | 134,738.10 | 100.00% | 2  | 2  | 2  | 0.02% | 9.84%  | IDESSL<br>GESDHV<br>KK             | 3.29 | 1,644.81 |
| Control | 6011 | plasma<br>membran<br>e calcium-55<br>transporti<br>ng<br>ATPase                                     | gi 1458276<br>2,gi 278072                         | 134,738.10 | 100.00% | 2  | 2  | 2  | 0.02% | 9.84%  | KADVGF<br>AMGIAG<br>TDVAK          | 4.38 | 1,666.85 |
| Control | 6011 | plasma<br>membran<br>e calcium-55<br>transporti<br>ng<br>ATPase                                     | gi 1458276<br>2,gi 278072                         | 134,738.10 | 100.00% | 2  | 2  | 2  | 0.02% | 9.84%  | QVVAVT<br>GDGTND<br>GPALKK         | 4.19 | 1,769.94 |
| Control | 6011 | plasma<br>membran<br>e calcium-55<br>transporti<br>ng<br>ATPase                                     | gi 1458276<br>2,gi 278072                         | 134,738.10 | 100.00% | 2  | 2  | 2  | 0.02% | 9.84%  | SLDKDP<br>LLSGT<br>HVMEGS<br>GR    | 4.23 | 2,128.07 |
| Control | 6011 | plasma<br>membran<br>e calcium-55<br>transporti<br>ng<br>ATPase                                     | gi 1458276<br>2,gi 278072                         | 134,738.10 | 100.00% | 2  | 2  | 2  | 0.02% | 9.84%  | YGDLLP<br>ADGILIQ<br>GNDLK         | 3.62 | 1,915.02 |

|         |      |                                                                               |            |            |         |   |   |   |       |       |                                 |          |
|---------|------|-------------------------------------------------------------------------------|------------|------------|---------|---|---|---|-------|-------|---------------------------------|----------|
| Control | 6011 | PREDIC TED: 12<br>similar to Ras GTPase-activating-like protein IQGAP1 (p195) | gi 1946767 | 182,771.10 | 100.00% | 7 | 7 | 7 | 0.05% | 6.00% | IIGNLLY YR 3.28                 | 1,124.65 |
| Control | 6011 | PREDIC TED: 12<br>similar to Ras GTPase-activating-like protein IQGAP1 (p195) | gi 1946767 | 182,771.10 | 100.00% | 7 | 7 | 7 | 0.05% | 6.00% | ILAIGLIN EALDEG DAQK 2.84       | 1,883.01 |
| Control | 6011 | PREDIC TED: 12<br>similar to Ras GTPase-activating-like protein IQGAP1 (p195) | gi 1946767 | 182,771.10 | 100.00% | 7 | 7 | 7 | 0.05% | 6.00% | ILQSPAL GLR 2.57                | 1,067.66 |
| Control | 6011 | PREDIC TED: 12<br>similar to Ras GTPase-activating-like protein IQGAP1 (p195) | gi 1946767 | 182,771.10 | 100.00% | 7 | 7 | 7 | 0.05% | 6.00% | TLINAED PPMIVV R 3.91           | 1,583.85 |
| Control | 6011 | PREDIC TED: 12<br>similar to Ras GTPase-activating-like protein IQGAP1 (p195) | gi 1946767 | 182,771.10 | 100.00% | 7 | 7 | 7 | 0.05% | 6.00% | TLQALQI PAAK 3.02               | 1,153.69 |
| Control | 6011 | PREDIC TED: 12<br>similar to Ras GTPase-activating-like protein IQGAP1 (p195) | gi 1946767 | 182,771.10 | 100.00% | 7 | 7 | 7 | 0.05% | 6.00% | VNLLAA LTNIDLA LEQGSA PALFK 4.6 | 2,482.39 |
| Control | 6011 | PREDIC TED: 12<br>similar to Ras GTPase-activating-like protein IQGAP1 (p195) | gi 1946767 | 182,771.10 | 100.00% | 7 | 7 | 7 | 0.05% | 6.00% | YQELIN DIAR 3.15                | 1,234.64 |

|         |      |                                                                                                                                    |                                                   |           |         |   |   |   |       |        |                            |      |          |
|---------|------|------------------------------------------------------------------------------------------------------------------------------------|---------------------------------------------------|-----------|---------|---|---|---|-------|--------|----------------------------|------|----------|
| Control | 6011 | RecName<br>:<br>Full=Vesi<br>cle<br>transport<br>protein<br>GOT1B;<br>AltName:<br>Full=Gol<br>gi<br>transport<br>1<br>homolog<br>B | gi 1099397<br>23,gi 11405<br>3223,gi 825<br>71709 | 15,408.60 | 100.00% | 3 | 3 | 5 | 0.04% | 20.30% | RVPVLG<br>SLLNLP<br>IR     | 3.59 | 1,604.00 |
| Control | 6011 | RecName<br>:<br>Full=Vesi<br>cle<br>transport<br>protein<br>GOT1B;<br>AltName:<br>Full=Gol<br>gi<br>transport<br>1<br>homolog<br>B | gi 1099397<br>23,gi 11405<br>3223,gi 825<br>71709 | 15,408.60 | 100.00% | 3 | 3 | 5 | 0.04% | 20.30% | SFVDKV<br>GESNNM<br>V      | 4.31 | 1,441.66 |
| Control | 6011 | RecName<br>:<br>Full=Vesi<br>cle<br>transport<br>protein<br>GOT1B;<br>AltName:<br>Full=Gol<br>gi<br>transport<br>1<br>homolog<br>B | gi 1099397<br>23,gi 11405<br>3223,gi 825<br>71709 | 15,408.60 | 100.00% | 3 | 3 | 5 | 0.04% | 20.30% | VPVLGS<br>LLNLP<br>R       | 4.07 | 1,447.90 |
| Control | 6011 | UNC84B<br>protein                                                                                                                  | gi 1515539<br>17,gi 15612<br>1283                 | 81,429.80 | 100.00% | 5 | 6 | 7 | 0.05% | 7.42%  | IRPTAVT<br>LEHVPK          | 3.94 | 1,460.86 |
| Control | 6011 | UNC84B<br>protein                                                                                                                  | gi 1515539<br>17,gi 15612<br>1283                 | 81,429.80 | 100.00% | 5 | 6 | 7 | 0.05% | 7.42%  | LEGQLA<br>GLR              | 2.79 | 956.5525 |
| Control | 6011 | UNC84B<br>protein                                                                                                                  | gi 1515539<br>17,gi 15612<br>1283                 | 81,429.80 | 100.00% | 5 | 6 | 7 | 0.05% | 7.42%  | LEGQLA<br>GLRQEL<br>AALTLK | 3.87 | 1,924.12 |
| Control | 6011 | UNC84B<br>protein                                                                                                                  | gi 1515539<br>17,gi 15612<br>1283                 | 81,429.80 | 100.00% | 5 | 6 | 7 | 0.05% | 7.42%  | MATYQV<br>VELR             | 3.27 | 1,225.62 |
| Control | 6011 | UNC84B<br>protein                                                                                                                  | gi 1515539<br>17,gi 15612<br>1283                 | 81,429.80 | 100.00% | 5 | 6 | 7 | 0.05% | 7.42%  | SEHQDQ<br>SEDLFK<br>K      | 2.33 | 1,590.74 |
| Control | 6011 | heat<br>shock<br>protein<br>beta-1                                                                                                 | gi 7103740<br>5,gi 743548<br>63,gi 85542<br>053   | 22,375.10 | 100.00% | 3 | 3 | 3 | 0.02% | 20.40% | LFDQAF<br>GLPR             | 3.51 | 1,163.62 |
| Control | 6011 | heat<br>shock<br>protein<br>beta-1                                                                                                 | gi 7103740<br>5,gi 743548<br>63,gi 85542<br>053   | 22,375.10 | 100.00% | 3 | 3 | 3 | 0.02% | 20.40% | QLSSGV<br>SEIQTA<br>DR     | 4.48 | 1,618.80 |

|         |      |                                                                                                                                                             |                                                 |           |         |   |   |   |       |        |                     |      |          |
|---------|------|-------------------------------------------------------------------------------------------------------------------------------------------------------------|-------------------------------------------------|-----------|---------|---|---|---|-------|--------|---------------------|------|----------|
| Control | 6011 | heat shock protein beta-1                                                                                                                                   | gi 71037405,gi 74354863,gi 85542053             | 22,375.10 | 100.00% | 3 | 3 | 3 | 0.02% | 20.40% | VSLDVN HFAPPEEL TVK | 2.95 | 1,797.94 |
| Control | 6011 | ribosomal protein L4                                                                                                                                        | gi 61553010,gi 62460480,gi 73917531,gi 74267758 | 47,395.70 | 100.00% | 4 | 5 | 6 | 0.05% | 10.40% | APIRPDI VNFVHT NLR  | 2.52 | 1,862.04 |
| Control | 6011 | ribosomal protein L4                                                                                                                                        | gi 61553010,gi 62460480,gi 73917531,gi 74267758 | 47,395.70 | 100.00% | 4 | 5 | 6 | 0.05% | 10.40% | APIRPDI VNFVHT NLRK | 2    | 1,990.13 |
| Control | 6011 | ribosomal protein L4                                                                                                                                        | gi 61553010,gi 62460480,gi 73917531,gi 74267758 | 47,395.70 | 100.00% | 4 | 5 | 6 | 0.05% | 10.40% | NIPGITL LNVS K      | 2.53 | 1,268.76 |
| Control | 6011 | ribosomal protein L4                                                                                                                                        | gi 61553010,gi 62460480,gi 73917531,gi 74267758 | 47,395.70 | 100.00% | 4 | 5 | 6 | 0.05% | 10.40% | PLISVYS EKGESS GK   | 2.33 | 1,580.82 |
| Control | 6011 | PREDICTED: similar to carnitine palmitoyl transferase 1C                                                                                                    | gi 194679924                                    | 80,680.30 | 100.00% | 2 | 2 | 2 | 0.02% | 3.81%  | LPVPAV QDTVNR       | 2.84 | 1,308.73 |
| Control | 6011 | PREDICTED: similar to carnitine palmitoyl transferase 1C                                                                                                    | gi 194679924                                    | 80,680.30 | 100.00% | 2 | 2 | 2 | 0.02% | 3.81%  | MTALAQ DFAVNL GPR   | 4.38 | 1,619.82 |
| Control | 6011 | PREDICTED: similar to ATP-dependent RNA helicase DDX3X (DEAD box protein 3, X-chromosomal) (Helicase-like protein 2) (HLP2) (DEAD box, X isoform) isoform 2 | gi 119922075                                    | 73,112.60 | 100.00% | 3 | 3 | 3 | 0.02% | 7.72%  | HVINFDL PSDIEEY VHR | 4.52 | 2,083.02 |



|         |      |                                                                                                                                                                                                                               |                                                                 |            |         |   |   |   |       |        |                                         |          |
|---------|------|-------------------------------------------------------------------------------------------------------------------------------------------------------------------------------------------------------------------------------|-----------------------------------------------------------------|------------|---------|---|---|---|-------|--------|-----------------------------------------|----------|
| Control | 6011 | PREDIC TED:<br>similar to<br>ATP-<br>dependen<br>t RNA<br>helicase<br>DDX3X<br>(DEAD<br>box<br>protein 3,<br>X-<br>chromoso<br>mal)<br>(Helicase-<br>like<br>protein 2)<br>(HLP2)<br>(DEAD<br>box, X<br>isoform)<br>isoform 2 | gi 1199220<br>75                                                | 73,112.60  | 100.00% | 3 | 3 | 3 | 0.02% | 7.72%  | SFLLDLL 4.18<br>NATGK                   | 1,291.73 |
| Control | 6011 | PREDIC TED:<br>similar to<br>ATP-<br>dependen<br>t RNA<br>helicase<br>DDX3X<br>(DEAD<br>box<br>protein 3,<br>X-<br>chromoso<br>mal)<br>(Helicase-<br>like<br>protein 2)<br>(HLP2)<br>(DEAD<br>box, X<br>isoform)<br>isoform 2 | gi 1199220<br>75                                                | 73,112.60  | 100.00% | 3 | 3 | 3 | 0.02% | 7.72%  | TAAFLLP 4.89<br>ILSQIYS<br>DGPGEA<br>LR | 2,332.26 |
| Control | 6011 | MYO1C<br>protein                                                                                                                                                                                                              | gi 1461865<br>25,gi 14790<br>6576,gi 397<br>403,gi 9010<br>9868 | 118,133.10 | 100.00% | 8 | 9 | 9 | 0.07% | 12.50% | DGIIDFT 3.33<br>PGSELLI<br>TK           | 1,718.92 |
| Control | 6011 | MYO1C<br>protein                                                                                                                                                                                                              | gi 1461865<br>25,gi 14790<br>6576,gi 397<br>403,gi 9010<br>9868 | 118,133.10 | 100.00% | 8 | 9 | 9 | 0.07% | 12.50% | FRENLIY 3.57<br>TYIGPVL<br>VSVNPY<br>R  | 2,513.36 |
| Control | 6011 | MYO1C<br>protein                                                                                                                                                                                                              | gi 1461865<br>25,gi 14790<br>6576,gi 397<br>403,gi 9010<br>9868 | 118,133.10 | 100.00% | 8 | 9 | 9 | 0.07% | 12.50% | GAPVGG 3.7<br>HILSYLL<br>EK             | 1,553.87 |
| Control | 6011 | MYO1C<br>protein                                                                                                                                                                                                              | gi 1461865<br>25,gi 14790<br>6576,gi 397<br>403,gi 9010<br>9868 | 118,133.10 | 100.00% | 8 | 9 | 9 | 0.07% | 12.50% | GEELLSP 4.55<br>LNLEQA<br>AYAR          | 1,873.97 |

|         |      |                                                           |                                                 |            |         |   |    |    |       |        |                                       |      |          |
|---------|------|-----------------------------------------------------------|-------------------------------------------------|------------|---------|---|----|----|-------|--------|---------------------------------------|------|----------|
| Control | 6011 | MYO1C protein                                             | gi 146186525,gi 147906576,gi 397403,gi 90109868 | 118,133.10 | 100.00% | 8 | 9  | 9  | 0.07% | 12.50% | LLQSNP<br>VLEAFG<br>NAK               | 3.06 | 1,600.87 |
| Control | 6011 | MYO1C protein                                             | gi 146186525,gi 147906576,gi 397403,gi 90109868 | 118,133.10 | 100.00% | 8 | 9  | 9  | 0.07% | 12.50% | MSLLEL<br>VEILK                       | 3.06 | 1,303.75 |
| Control | 6011 | MYO1C protein                                             | gi 146186525,gi 147906576,gi 397403,gi 90109868 | 118,133.10 | 100.00% | 8 | 9  | 9  | 0.07% | 12.50% | QLLLTP<br>NAVVIV<br>EDAK              | 3.81 | 1,723.00 |
| Control | 6011 | MYO1C protein                                             | gi 146186525,gi 147906576,gi 397403,gi 90109868 | 118,133.10 | 100.00% | 8 | 9  | 9  | 0.07% | 12.50% | VLQALG<br>SEPIQYA<br>VPVVK            | 3.54 | 1,911.10 |
| Control | 6011 | PREDICTED: similar to Ras-interacting protein 1 isoform 2 | gi 76642189                                     | 103,383.20 | 99.80%  | 2 | 2  | 2  | 0.02% | 4.15%  | DAVDTG<br>DIFESFS<br>SHPLIL<br>PLGSSR | 2.69 | 2,757.37 |
| Control | 6011 | PREDICTED: similar to Ras-interacting protein 1 isoform 2 | gi 76642189                                     | 103,383.20 | 99.80%  | 2 | 2  | 2  | 0.02% | 4.15%  | LSLTGPV<br>TDDALH<br>R                | 2.57 | 1,494.79 |
| Control | 6011 | PREDICTED: NOMO3-like protein isoform 2                   | gi 119916799,gi 119916801                       | 134,079.40 | 100.00% | 9 | 11 | 12 | 0.09% | 11.80% | EDGSFSF<br>YSLPSG<br>GYTVIPF<br>YR    | 3.37 | 2,489.17 |
| Control | 6011 | PREDICTED: NOMO3-like protein isoform 2                   | gi 119916799,gi 119916801                       | 134,079.40 | 100.00% | 9 | 11 | 12 | 0.09% | 11.80% | FEQAFY<br>TYDTSSP<br>SILTLTAI<br>R    | 3.29 | 2,524.26 |
| Control | 6011 | PREDICTED: NOMO3-like protein isoform 2                   | gi 119916799,gi 119916801                       | 134,079.40 | 100.00% | 9 | 11 | 12 | 0.09% | 11.80% | FLLFSSL<br>VTK                        | 2.65 | 1,154.68 |
| Control | 6011 | PREDICTED: NOMO3-like protein isoform 2                   | gi 119916799,gi 119916801                       | 134,079.40 | 100.00% | 9 | 11 | 12 | 0.09% | 11.80% | GQPLGP<br>AGVQVS<br>LR                | 3.53 | 1,378.78 |
| Control | 6011 | PREDICTED: NOMO3-like protein isoform 2                   | gi 119916799,gi 119916801                       | 134,079.40 | 100.00% | 9 | 11 | 12 | 0.09% | 11.80% | ITFDVAP<br>SR                         | 3.08 | 1,005.54 |

|         |      |                                                            |                                                                 |            |         |   |    |    |       |        |                                           |          |
|---------|------|------------------------------------------------------------|-----------------------------------------------------------------|------------|---------|---|----|----|-------|--------|-------------------------------------------|----------|
| Control | 6011 | PREDIC TED: NOMO3- like protein isoform 2                  | gi 1199167<br>99,gi 11991<br>6801                               | 134,079.40 | 100.00% | 9 | 11 | 12 | 0.09% | 11.80% | SQYDFV 2.41<br>LPQVSFT<br>AAGYHK          | 2,158.06 |
| Control | 6011 | PREDIC TED: NOMO3- like protein isoform 2                  | gi 1199167<br>99,gi 11991<br>6801                               | 134,079.40 | 100.00% | 9 | 11 | 12 | 0.09% | 11.80% | SSIDSEP 3.86<br>ALVLGP<br>LK              | 1,525.85 |
| Control | 6011 | PREDIC TED: NOMO3- like protein isoform 2                  | gi 1199167<br>99,gi 11991<br>6801                               | 134,079.40 | 100.00% | 9 | 11 | 12 | 0.09% | 11.80% | VLNGPE 3.96<br>GEGVPD<br>AVVTLN<br>SQIK   | 2,236.18 |
| Control | 6011 | PREDIC TED: NOMO3- like protein isoform 2                  | gi 1199167<br>99,gi 11991<br>6801                               | 134,079.40 | 100.00% | 9 | 11 | 12 | 0.09% | 11.80% | VQVMVP 3.13<br>EAETR                      | 1,274.64 |
| Control | 6011 | vesicle-associate d membran e protein 3                    | gi 1140523<br>42,gi 12213<br>6203,gi 868<br>22282               | 11,517.30  | 100.00% | 4 | 7  | 14 | 0.11% | 39.40% | ADALQA 4.21<br>GASQFE<br>TSAAK            | 1,665.81 |
| Control | 6011 | vesicle-associate d membran e protein 3                    | gi 1140523<br>42,gi 12213<br>6203,gi 868<br>22282               | 11,517.30  | 100.00% | 4 | 7  | 14 | 0.11% | 39.40% | LQQTQN 4.38<br>QVDEVV<br>DIMR             | 1,931.95 |
| Control | 6011 | vesicle-associate d membran e protein 3                    | gi 1140523<br>42,gi 12213<br>6203,gi 868<br>22282               | 11,517.30  | 100.00% | 4 | 7  | 14 | 0.11% | 39.40% | LSELDD 5.24<br>RADALQ<br>AGASQF<br>ETSAAK | 2,494.21 |
| Control | 6011 | vesicle-associate d membran e protein 3                    | gi 1140523<br>42,gi 12213<br>6203,gi 868<br>22282               | 11,517.30  | 100.00% | 4 | 7  | 14 | 0.11% | 39.40% | RLQQTQ 4.13<br>NQVDEV<br>VDIMR            | 2,072.06 |
| Control | 6011 | transmembrane emp24 protein transport domain containin g 9 | gi 5985849<br>1,gi 742679<br>97,gi 77736<br>600,gi 8117<br>5032 | 27,280.40  | 100.00% | 6 | 8  | 13 | 0.10% | 25.50% | DKLSEL 2.59<br>QLR                        | 1,101.63 |
| Control | 6011 | transmembrane emp24 protein transport domain containin g 9 | gi 5985849<br>1,gi 742679<br>97,gi 77736<br>600,gi 8117<br>5032 | 27,280.40  | 100.00% | 6 | 8  | 13 | 0.10% | 25.50% | EEYQPA 2.27<br>TPGLGM<br>FVEVKD<br>PEDK   | 2,495.17 |

|         |      |                                                            |            |            |         |   |   |    |       |        |                                            |      |          |
|---------|------|------------------------------------------------------------|------------|------------|---------|---|---|----|-------|--------|--------------------------------------------|------|----------|
| Control | 6011 | transmembrane emp24 protein transport domain containin g 9 | gi 5985849 | 27,280.40  | 100.00% | 6 | 8 | 13 | 0.10% | 25.50% | FSLFAG<br>GMLR                             | 2.95 | 1,114.57 |
| Control | 6011 | transmembrane emp24 protein transport domain containin g 9 | gi 5985849 | 27,280.40  | 100.00% | 6 | 8 | 13 | 0.10% | 25.50% | QLVEQV<br>EQIQK                            | 4.19 | 1,341.74 |
| Control | 6011 | transmembrane emp24 protein transport domain containin g 9 | gi 5985849 | 27,280.40  | 100.00% | 6 | 8 | 13 | 0.10% | 25.50% | QLVEQV<br>EQIQKE<br>QNYQR                  | 3.64 | 2,160.10 |
| Control | 6011 | transmembrane emp24 protein transport domain containin g 9 | gi 5985849 | 27,280.40  | 100.00% | 6 | 8 | 13 | 0.10% | 25.50% | QREEYQ<br>PATPGL<br>GMFVEV<br>KDPEDK       | 4.41 | 2,779.32 |
| Control | 6011 | PCDH1 protein                                              | gi 1340251 | 114,931.40 | 100.00% | 3 | 3 | 3  | 0.02% | 6.13%  | NTGLITV<br>QGPVDR<br>EDLSTLR               | 3.11 | 2,184.16 |
| Control | 6011 | PCDH1 protein                                              | gi 1340251 | 114,931.40 | 100.00% | 3 | 3 | 3  | 0.02% | 6.13%  | SPKPVK<br>PVEDED<br>ETGLQK                 | 4.45 | 1,996.02 |
| Control | 6011 | PCDH1 protein                                              | gi 1340251 | 114,931.40 | 100.00% | 3 | 3 | 3  | 0.02% | 6.13%  | TLETLL<br>GHSLDT<br>PLDIDIA<br>GDPEYE<br>R | 2.41 | 2,996.51 |
| Control | 6011 | RAB1A, member 48 RAS oncogene family                       | gi 1204194 | 22,660.40  | 100.00% | 4 | 7 | 16 | 0.13% | 31.20% | EFADSL<br>GIPFLET<br>SAK                   | 4.09 | 1,724.87 |
| Control | 6011 | RAB1A, member 48 RAS oncogene family                       | gi 1204194 | 22,660.40  | 100.00% | 4 | 7 | 16 | 0.13% | 31.20% | KVVDYT<br>TAKEFA<br>DSLGIPF<br>LETSK       | 3.09 | 2,730.42 |
| Control | 6011 | RAB1A, member 48 RAS oncogene family                       | gi 1204194 | 22,660.40  | 100.00% | 4 | 7 | 16 | 0.13% | 31.20% | LLLIGDS<br>GVGK                            | 3.38 | 1,071.64 |
| Control | 6011 | RAB1A, member 48 RAS oncogene family                       | gi 1204194 | 22,660.40  | 100.00% | 4 | 7 | 16 | 0.13% | 31.20% | LQIWDT<br>AGQER                            | 2.59 | 1,316.66 |
| Control | 6011 | RAB1A, member 48 RAS oncogene family                       | gi 1204194 | 22,660.40  | 100.00% | 4 | 7 | 16 | 0.13% | 31.20% | NATNVE<br>QSFMTM<br>AAEIK                  | 3.01 | 1,900.88 |

|         |      |                                          |                                                  |           |         |    |    |    |       |        |                                                |      |          |
|---------|------|------------------------------------------|--------------------------------------------------|-----------|---------|----|----|----|-------|--------|------------------------------------------------|------|----------|
| Control | 6011 | LMNB1 protein                            | gi 154425605.gi 157074106                        | 66,404.60 | 100.00% | 15 | 23 | 36 | 0.28% | 33.80% | ALYETE<br>LADAR                                | 2.92 | 1,251.62 |
| Control | 6011 | LMNB1 protein                            | gi 154425605.gi 157074106                        | 66,404.60 | 100.00% | 15 | 23 | 36 | 0.28% | 33.80% | DQMQQ<br>QLNDYE<br>QLLDVK                      | 3.36 | 2,123.99 |
| Control | 6011 | LMNB1 protein                            | gi 154425605.gi 157074106                        | 66,404.60 | 100.00% | 15 | 23 | 36 | 0.28% | 33.80% | FKAEHD<br>QLLLNY<br>AK                         | 4.7  | 1,689.90 |
| Control | 6011 | LMNB1 protein                            | gi 154425605.gi 157074106                        | 66,404.60 | 100.00% | 15 | 23 | 36 | 0.28% | 33.80% | IESLSSQ<br>LSNLQK                              | 4.87 | 1,446.78 |
| Control | 6011 | LMNB1 protein                            | gi 154425605.gi 157074106                        | 66,404.60 | 100.00% | 15 | 23 | 36 | 0.28% | 33.80% | IQELEDL<br>LAK                                 | 3.1  | 1,171.66 |
| Control | 6011 | LMNB1 protein                            | gi 154425605.gi 157074106                        | 66,404.60 | 100.00% | 15 | 23 | 36 | 0.28% | 33.80% | KLLEGE<br>EERLK                                | 2.99 | 1,343.75 |
| Control | 6011 | LMNB1 protein                            | gi 154425605.gi 157074106                        | 66,404.60 | 100.00% | 15 | 23 | 36 | 0.28% | 33.80% | KNMYEE<br>EINETR                               | 2.18 | 1,571.70 |
| Control | 6011 | LMNB1 protein                            | gi 154425605.gi 157074106                        | 66,404.60 | 100.00% | 15 | 23 | 36 | 0.28% | 33.80% | LAQALH<br>EMREQH<br>DAQVK                      | 2.3  | 2,020.00 |
| Control | 6011 | LMNB1 protein                            | gi 154425605.gi 157074106                        | 66,404.60 | 100.00% | 15 | 23 | 36 | 0.28% | 33.80% | LQEKEE<br>LRELND<br>R                          | 2.84 | 1,671.87 |
| Control | 6011 | LMNB1 protein                            | gi 154425605.gi 157074106                        | 66,404.60 | 100.00% | 15 | 23 | 36 | 0.28% | 33.80% | LREYEA<br>ALNSK                                | 3.38 | 1,293.68 |
| Control | 6011 | LMNB1 protein                            | gi 154425605.gi 157074106                        | 66,404.60 | 100.00% | 15 | 23 | 36 | 0.28% | 33.80% | LYKEEL<br>EQTYHA<br>K                          | 3.56 | 1,651.83 |
| Control | 6011 | LMNB1 protein                            | gi 154425605.gi 157074106                        | 66,404.60 | 100.00% | 15 | 23 | 36 | 0.28% | 33.80% | MRIESLS<br>SQLSNL<br>QK                        | 4.92 | 1,749.92 |
| Control | 6011 | LMNB1 protein                            | gi 154425605.gi 157074106                        | 66,404.60 | 100.00% | 15 | 23 | 36 | 0.28% | 33.80% | NMYEEE<br>INETR                                | 3.57 | 1,443.61 |
| Control | 6011 | LMNB1 protein                            | gi 154425605.gi 157074106                        | 66,404.60 | 100.00% | 15 | 23 | 36 | 0.28% | 33.80% | SLESdle<br>DLKDQI<br>AQLEAS<br>LAAAK           | 5.66 | 2,558.32 |
| Control | 6011 | LMNB1 protein                            | gi 154425605.gi 157074106                        | 66,404.60 | 100.00% | 15 | 23 | 36 | 0.28% | 33.80% | TTIPEEE<br>EEEEEA<br>AEVAVE<br>EELFHQ<br>QGAPR | 4.19 | 3,425.55 |
| Control | 6011 | RecName : Full=40S ribosomal protein S20 | gi 108860955.gi 61822677.gi 73587131.gi 77735823 | 13,355.00 | 100.00% | 2  | 3  | 3  | 0.02% | 12.60% | DTGKTP<br>VEPEVAI<br>HR                        | 4.89 | 1,648.87 |
| Control | 6011 | RecName : Full=40S ribosomal protein S20 | gi 108860955.gi 61822677.gi 73587131.gi 77735823 | 13,355.00 | 100.00% | 2  | 3  | 3  | 0.02% | 12.60% | TPVEPE<br>VAIHR                                | 4.45 | 1,247.67 |
| Control | 6011 | RAB8A protein                            | gi 133778133.gi 157428086                        | 23,667.60 | 99.80%  | 2  | 2  | 2  | 0.02% | 17.90% | ANINVE<br>NAFYTL<br>AR                         | 3.53 | 1,595.82 |
| Control | 6011 | RAB8A protein                            | gi 133778133.gi 157428086                        | 23,667.60 | 99.80%  | 2  | 2  | 2  | 0.02% | 17.90% | LLLIGDS<br>GVGK                                | 3.38 | 1,071.64 |

|         |      |                                                                                                                                                                                                             |                                             |           |         |   |   |   |       |        |                          |      |          |
|---------|------|-------------------------------------------------------------------------------------------------------------------------------------------------------------------------------------------------------------|---------------------------------------------|-----------|---------|---|---|---|-------|--------|--------------------------|------|----------|
| Control | 6011 | RAB8A protein                                                                                                                                                                                               | gi 133778133,gi 157428086                   | 23,667.60 | 99.80%  | 2 | 2 | 2 | 0.02% | 17.90% | NIEEHASADVEK             | 3.33 | 1,341.63 |
| Control | 6011 | Syntaxin 5                                                                                                                                                                                                  | gi 115304999,gi 115495735,gi 122132206      | 39,529.40 | 99.80%  | 2 | 2 | 2 | 0.02% | 9.86%  | APVSALPLAPNLGGGAVVLGAESR | 3.7  | 2,353.30 |
| Control | 6011 | Syntaxin 5                                                                                                                                                                                                  | gi 115304999,gi 115495735,gi 122132206      | 39,529.40 | 99.80%  | 2 | 2 | 2 | 0.02% | 9.86%  | QIAQLQDFVR               | 3.12 | 1,217.66 |
| Control | 6011 | Interleukin enhancer binding factor 2, 45kDa                                                                                                                                                                | gi 83405442,gi 84000347                     | 43,068.60 | 100.00% | 5 | 5 | 5 | 0.04% | 21.50% | ILPTLEAVAAALGNK          | 3.4  | 1,409.84 |
| Control | 6011 | Interleukin enhancer binding factor 2, 45kDa                                                                                                                                                                | gi 83405442,gi 84000347                     | 43,068.60 | 100.00% | 5 | 5 | 5 | 0.04% | 21.50% | INNVIDNLIVAPGTFEVQIEEVR  | 3.91 | 2,582.38 |
| Control | 6011 | Interleukin enhancer binding factor 2, 45kDa                                                                                                                                                                | gi 83405442,gi 84000347                     | 43,068.60 | 100.00% | 5 | 5 | 5 | 0.04% | 21.50% | NQDLAPNSAEQASILSLVK      | 5.34 | 2,099.10 |
| Control | 6011 | Interleukin enhancer binding factor 2, 45kDa                                                                                                                                                                | gi 83405442,gi 84000347                     | 43,068.60 | 100.00% | 5 | 5 | 5 | 0.04% | 21.50% | VKPAPD ETSFSEALLKR       | 3.17 | 1,888.02 |
| Control | 6011 | Interleukin enhancer binding factor 2, 45kDa                                                                                                                                                                | gi 83405442,gi 84000347                     | 43,068.60 | 100.00% | 5 | 5 | 5 | 0.04% | 21.50% | VLQSALAAIR               | 2.97 | 1,041.64 |
| Control | 6011 | RecName: Full=Cytochrome c oxidase polypeptide 7A2, mitochondrial; AltName: Full=Cytochrome c oxidase polypeptide VIIa-liver/heart; Short=Cytochrome c oxidase subunit VIIa-L; Short=VIIC; Flags: Precursor | gi 117120,gi 28461241,gi 488158,gi 74354141 | 9,305.40  | 99.80%  | 2 | 3 | 4 | 0.03% | 27.70% | GGIADALLYR               | 3.14 | 1,048.58 |

|         |      |                                                                                                                                                                                                                                                                                                   |                                                                   |           |         |   |   |    |       |        |                                                        |          |
|---------|------|---------------------------------------------------------------------------------------------------------------------------------------------------------------------------------------------------------------------------------------------------------------------------------------------------|-------------------------------------------------------------------|-----------|---------|---|---|----|-------|--------|--------------------------------------------------------|----------|
| Control | 6011 | RecName<br>:<br>Full=Cyt<br>ochrome<br>c oxidase<br>polypepti<br>de 7A2,<br>mitochon<br>drial;<br>AltName:<br>Full=Cyt<br>ochrome<br>c oxidase<br>polypepti<br>de VIIa-<br>liver/hear<br>t;<br>Short=Cy<br>tochrome<br>c oxidase<br>subunit<br>VIIa-L;<br>Short=VI<br>IIC;<br>Flags:<br>Precursor | gi 117120.g<br>i 28461241,<br>gi 488158.g<br>i 74354141           | 9,305.40  | 99.80%  | 2 | 3 | 4  | 0.03% | 27.70% | LFQEDN 2.43<br>GIPVHLK                                 | 1,509.81 |
| Control | 6011 | SLC25A<br>24<br>protein                                                                                                                                                                                                                                                                           | gi 1487454<br>86,gi 14964<br>2721,gi 167<br>016553                | 53,268.40 | 100.00% | 5 | 7 | 9  | 0.07% | 22.60% | DSVNPG 3<br>VMVLLG<br>CGALSS<br>TCGQLA<br>SYPLAL<br>VR | 3,207.62 |
| Control | 6011 | SLC25A<br>24<br>protein                                                                                                                                                                                                                                                                           | gi 1487454<br>86,gi 14964<br>2721,gi 167<br>016553                | 53,268.40 | 100.00% | 5 | 7 | 9  | 0.07% | 22.60% | GYVPNL 5.45<br>LGIIPYA<br>GIDLAV<br>YELLK              | 2,604.47 |
| Control | 6011 | SLC25A<br>24<br>protein                                                                                                                                                                                                                                                                           | gi 1487454<br>86,gi 14964<br>2721,gi 167<br>016553                | 53,268.40 | 100.00% | 5 | 7 | 9  | 0.07% | 22.60% | HSTGIDI 4.03<br>GDSLTP<br>DEFTED<br>EKK                | 2,547.21 |
| Control | 6011 | SLC25A<br>24<br>protein                                                                                                                                                                                                                                                                           | gi 1487454<br>86,gi 14964<br>2721,gi 167<br>016553                | 53,268.40 | 100.00% | 5 | 7 | 9  | 0.07% | 22.60% | QLLAGG 3.73<br>VAGAVS<br>R                             | 1,198.69 |
| Control | 6011 | SLC25A<br>24<br>protein                                                                                                                                                                                                                                                                           | gi 1487454<br>86,gi 14964<br>2721,gi 167<br>016553                | 53,268.40 | 100.00% | 5 | 7 | 9  | 0.07% | 22.60% | VLPAVGI 2.46<br>SYVVYE<br>NMK                          | 1,797.95 |
| Control | 6011 | RecName<br>:<br>Full=NA<br>DPH--<br>cytochro<br>me P450<br>reductase<br>;<br>Short=CP<br>R;<br>Short=P4<br>50R                                                                                                                                                                                    | gi 1102876<br>86,gi 14623<br>1834,gi 742<br>68199,gi 78<br>369374 | 77,249.90 | 100.00% | 5 | 7 | 12 | 0.09% | 11.90% | ATTPVI 4.54<br>MVGPGT<br>GVAPFIG<br>FIQER              | 2,474.31 |

|         |      |                                                                                                                |                                                                   |           |         |   |   |    |       |        |                                         |          |
|---------|------|----------------------------------------------------------------------------------------------------------------|-------------------------------------------------------------------|-----------|---------|---|---|----|-------|--------|-----------------------------------------|----------|
| Control | 6011 | RecName<br>:<br>Full=NA<br>DPH--<br>cytochro<br>me P450<br>reductase<br>;<br>Short=CP<br>R;<br>Short=P4<br>50R | gi 1102876<br>86,gi 14623<br>1834,gi 742<br>68199,gi 78<br>369374 | 77,249.90 | 100.00% | 5 | 7 | 12 | 0.09% | 11.90% | GMAADP 3.57<br>EEYDLA<br>DLSSLPE<br>IEK | 2,409.10 |
| Control | 6011 | RecName<br>:<br>Full=NA<br>DPH--<br>cytochro<br>me P450<br>reductase<br>;<br>Short=CP<br>R;<br>Short=P4<br>50R | gi 1102876<br>86,gi 14623<br>1834,gi 742<br>68199,gi 78<br>369374 | 77,249.90 | 100.00% | 5 | 7 | 12 | 0.09% | 11.90% | SYENQK 4<br>PPFDAK                      | 1,423.69 |
| Control | 6011 | RecName<br>:<br>Full=NA<br>DPH--<br>cytochro<br>me P450<br>reductase<br>;<br>Short=CP<br>R;<br>Short=P4<br>50R | gi 1102876<br>86,gi 14623<br>1834,gi 742<br>68199,gi 78<br>369374 | 77,249.90 | 100.00% | 5 | 7 | 12 | 0.09% | 11.90% | TALTYY 3.09<br>LDITNPP<br>R             | 1,637.85 |
| Control | 6011 | RecName<br>:<br>Full=NA<br>DPH--<br>cytochro<br>me P450<br>reductase<br>;<br>Short=CP<br>R;<br>Short=P4<br>50R | gi 1102876<br>86,gi 14623<br>1834,gi 742<br>68199,gi 78<br>369374 | 77,249.90 | 100.00% | 5 | 7 | 12 | 0.09% | 11.90% | YAVFAL 2.95<br>GNK                      | 982.5356 |
| Control | 6011 | TXNDC1<br>0 protein                                                                                            | gi 1515540<br>48,gi 15612<br>1223                                 | 51,713.50 | 99.80%  | 2 | 4 | 5  | 0.04% | 6.83%  | FQNYLT 3.29<br>MDGFL<br>YELGDT<br>GK    | 2,341.11 |
| Control | 6011 | TXNDC1<br>0 protein                                                                                            | gi 1515540<br>48,gi 15612<br>1223                                 | 51,713.50 | 99.80%  | 2 | 4 | 5  | 0.04% | 6.83%  | TKDDIIE 4.37<br>FAHR                    | 1,344.69 |
| Control | 6011 | MTCH1<br>protein                                                                                               | gi 1544261<br>80,gi 15707<br>4126                                 | 41,499.70 | 100.00% | 6 | 6 | 7  | 0.05% | 24.40% | KVLYLP 3.59<br>SFFTYA<br>K              | 1,576.88 |
| Control | 6011 | MTCH1<br>protein                                                                                               | gi 1544261<br>80,gi 15707<br>4126                                 | 41,499.70 | 100.00% | 6 | 6 | 7  | 0.05% | 24.40% | LLIQVGH 2.65<br>EPMPTI<br>GTNVLG<br>R   | 2,258.23 |
| Control | 6011 | MTCH1<br>protein                                                                                               | gi 1544261<br>80,gi 15707<br>4126                                 | 41,499.70 | 100.00% | 6 | 6 | 7  | 0.05% | 24.40% | LMSNAL 3.9<br>STVTR                     | 1,208.63 |



|         |      |                                                       |                                                                                |            |         |    |    |    |       |        |                                                                       |          |
|---------|------|-------------------------------------------------------|--------------------------------------------------------------------------------|------------|---------|----|----|----|-------|--------|-----------------------------------------------------------------------|----------|
| Control | 6011 | MTCH1 protein                                         | gi 154426180,gi 157074126                                                      | 41,499.70  | 100.00% | 6  | 6  | 7  | 0.05% | 24.40% | RMDGAS 3.43<br>GGLGSG<br>DNAPTT<br>EALFVA<br>LGAGVT<br>ALSHPLL<br>YVK | 3,930.01 |
| Control | 6011 | MTCH1 protein                                         | gi 154426180,gi 157074126                                                      | 41,499.70  | 100.00% | 6  | 6  | 7  | 0.05% | 24.40% | VLYLPSF 2.67<br>FTYAK                                                 | 1,448.78 |
| Control | 6011 | MTCH1 protein                                         | gi 154426180,gi 157074126                                                      | 41,499.70  | 100.00% | 6  | 6  | 7  | 0.05% | 24.40% | YSGVLS 2.53<br>SIGK                                                   | 1,010.55 |
| Control | 6011 | RecName : Full=Hist one H2A.V; AltName: Full=H2 A.F/Z | gi 109940032,gi 1631507,gi 410,gi 81674301,gi 81674755,gi 83288407,gi 84000371 | 13,535.20  | 99.90%  | 2  | 6  | 6  | 0.05% | 33.60% | ATIAGG 4.02<br>GVIPHH<br>K                                            | 1,370.79 |
| Control | 6011 | RecName : Full=Hist one H2A.V; AltName: Full=H2 A.F/Z | gi 109940032,gi 1631507,gi 410,gi 81674301,gi 81674755,gi 83288407,gi 84000371 | 13,535.20  | 99.90%  | 2  | 6  | 6  | 0.05% | 33.60% | VGATAA 5.34<br>VYSAAIL<br>EYLTAE<br>VLELAG<br>NASK                    | 2,895.54 |
| Control | 6011 | PREDIC TED: vinculin isoform 1                        | gi 194679457,gi 194679459                                                      | 123,848.10 | 99.80%  | 2  | 2  | 2  | 0.02% | 3.79%  | AIPDLTA 2.56<br>PVAAVQ<br>AAVSNL<br>VR                                | 2,076.18 |
| Control | 6011 | PREDIC TED: vinculin isoform 1                        | gi 194679457,gi 194679459                                                      | 123,848.10 | 99.80%  | 2  | 2  | 2  | 0.02% | 3.79%  | LLAVAA 2.61<br>TAPPDA<br>PNREEV<br>FDER                               | 2,381.21 |
| Control | 6011 | non-muscle myosin heavy chain                         | gi 3205211                                                                     | 72,354.70  | 100.00% | 10 | 14 | 17 | 0.13% | 23.50% | ALEEAM 3.25<br>EQKAEL<br>ER                                           | 1,662.80 |
| Control | 6011 | non-muscle myosin heavy chain                         | gi 3205211                                                                     | 72,354.70  | 100.00% | 10 | 14 | 17 | 0.13% | 23.50% | ALEQQV 4.44<br>EEMKTQ<br>LEELEDE<br>LQATED<br>AK                      | 3,163.48 |
| Control | 6011 | non-muscle myosin heavy chain                         | gi 3205211                                                                     | 72,354.70  | 100.00% | 10 | 14 | 17 | 0.13% | 23.50% | ANLQID 4.29<br>QLNTDL<br>NLER                                         | 1,869.97 |
| Control | 6011 | non-muscle myosin heavy chain                         | gi 3205211                                                                     | 72,354.70  | 100.00% | 10 | 14 | 17 | 0.13% | 23.50% | IAQLEEE 3.74<br>LEEEQG<br>NTELVN<br>DR                                | 2,458.16 |
| Control | 6011 | non-muscle myosin heavy chain                         | gi 3205211                                                                     | 72,354.70  | 100.00% | 10 | 14 | 17 | 0.13% | 23.50% | IAQLEEQ 4.52<br>LDNETK<br>ER                                          | 1,815.91 |
| Control | 6011 | non-muscle myosin heavy chain                         | gi 3205211                                                                     | 72,354.70  | 100.00% | 10 | 14 | 17 | 0.13% | 23.50% | KFDQLL 3.08<br>AEEK                                                   | 1,220.65 |

|         |      |                                                                                                |                                                  |           |         |    |    |    |       |        |                                              |      |          |
|---------|------|------------------------------------------------------------------------------------------------|--------------------------------------------------|-----------|---------|----|----|----|-------|--------|----------------------------------------------|------|----------|
| Control | 6011 | non-muscle myosin heavy chain                                                                  | gi 3205211                                       | 72,354.70 | 100.00% | 10 | 14 | 17 | 0.13% | 23.50% | LKDVLV<br>QVDDER<br>R                        | 2.53 | 1,598.89 |
| Control | 6011 | non-muscle myosin heavy chain                                                                  | gi 3205211                                       | 72,354.70 | 100.00% | 10 | 14 | 17 | 0.13% | 23.50% | QAQQR<br>DELADEI<br>ANSSGK                   | 3.71 | 2,088.98 |
| Control | 6011 | non-muscle myosin heavy chain                                                                  | gi 3205211                                       | 72,354.70 | 100.00% | 10 | 14 | 17 | 0.13% | 23.50% | RQLEEA<br>EEEAQR                             | 3.28 | 1,487.71 |
| Control | 6011 | non-muscle myosin heavy chain                                                                  | gi 3205211                                       | 72,354.70 | 100.00% | 10 | 14 | 17 | 0.13% | 23.50% | TQLEELE<br>DELQAT<br>EDAK                    | 3.8  | 1,961.92 |
| Control | 6011 | RecName : Full=T-complex protein 1 subunit delta; Short=T CP-1-delta; AltName: Full=CC T-delta | gi 1153058<br>39,gi 83406<br>133,gi 8400<br>0361 | 58,190.00 | 100.00% | 3  | 3  | 3  | 0.02% | 10.70% | AFADAM<br>EVIPSTL<br>AENAGL<br>NPISVT<br>ELR | 3.72 | 3,046.54 |
| Control | 6011 | RecName : Full=T-complex protein 1 subunit delta; Short=T CP-1-delta; AltName: Full=CC T-delta | gi 1153058<br>39,gi 83406<br>133,gi 8400<br>0361 | 58,190.00 | 100.00% | 3  | 3  | 3  | 0.02% | 10.70% | ALIAGG<br>GAPEIEL<br>ALR                     | 3.77 | 1,550.89 |
| Control | 6011 | RecName : Full=T-complex protein 1 subunit delta; Short=T CP-1-delta; AltName: Full=CC T-delta | gi 1153058<br>39,gi 83406<br>133,gi 8400<br>0361 | 58,190.00 | 100.00% | 3  | 3  | 3  | 0.02% | 10.70% | VIDPATA<br>TSVDLR                            | 2.91 | 1,357.73 |
| Control | 6011 | RPN1 protein                                                                                   | gi 1267173<br>91,gi 12927<br>7520                | 68,335.00 | 100.00% | 14 | 22 | 39 | 0.30% | 36.50% | AASFLL<br>ALEPELE<br>AR                      | 4.33 | 1,629.88 |
| Control | 6011 | RPN1 protein                                                                                   | gi 1267173<br>91,gi 12927<br>7520                | 68,335.00 | 100.00% | 14 | 22 | 39 | 0.30% | 36.50% | DTYIENE<br>KLISGK                            | 3.53 | 1,509.78 |
| Control | 6011 | RPN1 protein                                                                                   | gi 1267173<br>91,gi 12927<br>7520                | 68,335.00 | 100.00% | 14 | 22 | 39 | 0.30% | 36.50% | ENLVEQ<br>HIQDIVV<br>HYTFNK                  | 4.73 | 2,326.18 |

|         |      |                                                                                               |                                                                                 |           |         |    |    |    |       |        |                                           |      |          |
|---------|------|-----------------------------------------------------------------------------------------------|---------------------------------------------------------------------------------|-----------|---------|----|----|----|-------|--------|-------------------------------------------|------|----------|
| Control | 6011 | RPN1<br>protein                                                                               | gi 1267173<br>91.gi 12927<br>7520                                               | 68,335.00 | 100.00% | 14 | 22 | 39 | 0.30% | 36.50% | IDHILDA<br>L                              | 2.38 | 909.5042 |
| Control | 6011 | RPN1<br>protein                                                                               | gi 1267173<br>91.gi 12927<br>7520                                               | 68,335.00 | 100.00% | 14 | 22 | 39 | 0.30% | 36.50% | ISVIVEA<br>VYTHVL<br>QPYPTQI<br>TQSEK     | 3.6  | 2,843.52 |
| Control | 6011 | RPN1<br>protein                                                                               | gi 1267173<br>91.gi 12927<br>7520                                               | 68,335.00 | 100.00% | 14 | 22 | 39 | 0.30% | 36.50% | LPVALD<br>PGAK                            | 2.04 | 980.5777 |
| Control | 6011 | RPN1<br>protein                                                                               | gi 1267173<br>91.gi 12927<br>7520                                               | 68,335.00 | 100.00% | 14 | 22 | 39 | 0.30% | 36.50% | LVDHVF<br>DEQVIDS<br>LTVK                 | 4.82 | 1,957.03 |
| Control | 6011 | RPN1<br>protein                                                                               | gi 1267173<br>91.gi 12927<br>7520                                               | 68,335.00 | 100.00% | 14 | 22 | 39 | 0.30% | 36.50% | NIQVDSP<br>YEISR                          | 3.46 | 1,420.71 |
| Control | 6011 | RPN1<br>protein                                                                               | gi 1267173<br>91.gi 12927<br>7520                                               | 68,335.00 | 100.00% | 14 | 22 | 39 | 0.30% | 36.50% | QFVVFE<br>GNHYFY<br>SPYPTK                | 3.21 | 2,223.05 |
| Control | 6011 | RPN1<br>protein                                                                               | gi 1267173<br>91.gi 12927<br>7520                                               | 68,335.00 | 100.00% | 14 | 22 | 39 | 0.30% | 36.50% | SEDLLD<br>YGPFR                           | 4.33 | 1,311.62 |
| Control | 6011 | RPN1<br>protein                                                                               | gi 1267173<br>91.gi 12927<br>7520                                               | 68,335.00 | 100.00% | 14 | 22 | 39 | 0.30% | 36.50% | THYIVG<br>YNLPSY<br>EYLYNL<br>GDQYAL<br>K | 4.4  | 2,997.47 |
| Control | 6011 | RPN1<br>protein                                                                               | gi 1267173<br>91.gi 12927<br>7520                                               | 68,335.00 | 100.00% | 14 | 22 | 39 | 0.30% | 36.50% | VHSENN<br>SPFLTIT<br>SMTR                 | 5    | 1,933.94 |
| Control | 6011 | RPN1<br>protein                                                                               | gi 1267173<br>91.gi 12927<br>7520                                               | 68,335.00 | 100.00% | 14 | 22 | 39 | 0.30% | 36.50% | VTAEVV<br>LAHAGS<br>GSSPR                 | 4.01 | 1,637.86 |
| Control | 6011 | RPN1<br>protein                                                                               | gi 1267173<br>91.gi 12927<br>7520                                               | 68,335.00 | 100.00% | 14 | 22 | 39 | 0.30% | 36.50% | YDYQRQ<br>PDSGVS<br>SVR                   | 4.04 | 1,756.82 |
| Control | 6011 | acyl-<br>Coenzym<br>e A<br>dehydrog<br>enase,<br>very long<br>chain<br>isoform 1<br>precursor | gi 1462318<br>22.gi 16033<br>2360.gi 278<br>06205.gi 74<br>267810.gi 9<br>30358 | 70,632.20 | 100.00% | 4  | 4  | 4  | 0.03% | 9.92%  | DIINEQF<br>LLQR                           | 3    | 1,388.75 |
| Control | 6011 | acyl-<br>Coenzym<br>e A<br>dehydrog<br>enase,<br>very long<br>chain<br>isoform 1<br>precursor | gi 1462318<br>22.gi 16033<br>2360.gi 278<br>06205.gi 74<br>267810.gi 9<br>30358 | 70,632.20 | 100.00% | 4  | 4  | 4  | 0.03% | 9.92%  | GQLTTD<br>QVFPYP<br>SVLNED<br>QTQFLK      | 4.6  | 2,768.38 |
| Control | 6011 | acyl-<br>Coenzym<br>e A<br>dehydrog<br>enase,<br>very long<br>chain<br>isoform 1<br>precursor | gi 1462318<br>22.gi 16033<br>2360.gi 278<br>06205.gi 74<br>267810.gi 9<br>30358 | 70,632.20 | 100.00% | 4  | 4  | 4  | 0.03% | 9.92%  | NPFGNA<br>GLLLGE<br>AGK                   | 4.26 | 1,457.77 |

|         |      |                                                                     |                                                             |           |         |   |   |   |       |        |                                                |      |          |
|---------|------|---------------------------------------------------------------------|-------------------------------------------------------------|-----------|---------|---|---|---|-------|--------|------------------------------------------------|------|----------|
| Control | 6011 | acyl-Coenzyme A dehydrogenase, very long chain isoform 1 precursor  | gi 146231822,gi 160332360,gi 27806205,gi 74267810,gi 930358 | 70,632.20 | 100.00% | 4 | 4 | 4 | 0.03% | 9.92%  | VPAENV<br>LGEVGG<br>GFK                        | 4.81 | 1,472.77 |
| Control | 6011 | PREDICTED: similar to ubiquitin-conjugating enzyme E2, J1 isoform 2 | gi 194669972                                                | 35,073.60 | 99.80%  | 2 | 2 | 2 | 0.02% | 10.10% | GPPDSD<br>FDGGVY<br>HGR                        | 2.55 | 1,575.68 |
| Control | 6011 | PREDICTED: similar to ubiquitin-conjugating enzyme E2, J1 isoform 2 | gi 194669972                                                | 35,073.60 | 99.80%  | 2 | 2 | 2 | 0.02% | 10.10% | SGSDSS<br>QADQEA<br>KELAR                      | 2.99 | 1,778.82 |
| Control | 6011 | RecName: Full=60S ribosomal protein L8                              | gi 108860941,gi 154426156,gi 74267654,gi 77736197           | 28,006.80 | 100.00% | 4 | 4 | 5 | 0.04% | 21.40% | AQLNIG<br>NVLPVG<br>TMPEGTI<br>VCCLEE<br>KPGDR | 3.27 | 3,169.57 |
| Control | 6011 | RecName: Full=60S ribosomal protein L8                              | gi 108860941,gi 154426156,gi 74267654,gi 77736197           | 28,006.80 | 100.00% | 4 | 4 | 5 | 0.04% | 21.40% | ASGNYA<br>TVISHNP<br>ETK                       | 4.32 | 1,688.82 |
| Control | 6011 | RecName: Full=60S ribosomal protein L8                              | gi 108860941,gi 154426156,gi 74267654,gi 77736197           | 28,006.80 | 100.00% | 4 | 4 | 5 | 0.04% | 21.40% | ASGNYA<br>TVISHNP<br>ETKK                      | 3.22 | 1,816.92 |
| Control | 6011 | RecName: Full=60S ribosomal protein L8                              | gi 108860941,gi 154426156,gi 74267654,gi 77736197           | 28,006.80 | 100.00% | 4 | 4 | 5 | 0.04% | 21.40% | VVFRDP<br>YR                                   | 1.32 | 1,051.57 |

|         |      |                                                                                                                                                                                                                                                                                                           |                 |           |         |   |   |   |       |       |                        |      |          |
|---------|------|-----------------------------------------------------------------------------------------------------------------------------------------------------------------------------------------------------------------------------------------------------------------------------------------------------------|-----------------|-----------|---------|---|---|---|-------|-------|------------------------|------|----------|
| Control | 6011 | PREDIC<br>TED:<br>similar to<br>Golgi<br>integral<br>membran<br>e protein<br>4 (Golgi<br>phosphop<br>rotein 4)<br>(Golgi<br>integral<br>membran<br>e protein,<br>cis)<br>(GIMPc)<br>(Golgi-<br>localized<br>phosphop<br>rotein of<br>130 kDa)<br>(Golgi<br>phosphop<br>rotein of<br>130 kDa)<br>isoform 2 | gi 7660779<br>7 | 81,272.00 | 100.00% | 3 | 5 | 6 | 0.05% | 5.48% | LREEQE<br>ALHQQR       | 3.05 | 1,536.79 |
| Control | 6011 | PREDIC<br>TED:<br>similar to<br>Golgi<br>integral<br>membran<br>e protein<br>4 (Golgi<br>phosphop<br>rotein 4)<br>(Golgi<br>integral<br>membran<br>e protein,<br>cis)<br>(GIMPc)<br>(Golgi-<br>localized<br>phosphop<br>rotein of<br>130 kDa)<br>(Golgi<br>phosphop<br>rotein of<br>130 kDa)<br>isoform 2 | gi 7660779<br>7 | 81,272.00 | 100.00% | 3 | 5 | 6 | 0.05% | 5.48% | SALAAA<br>QTQVAE<br>YK | 4.05 | 1,450.75 |

|         |      |                                                                                                                                                                                                                            |            |            |         |   |   |   |       |       |                                    |      |          |
|---------|------|----------------------------------------------------------------------------------------------------------------------------------------------------------------------------------------------------------------------------|------------|------------|---------|---|---|---|-------|-------|------------------------------------|------|----------|
| Control | 6011 | PREDICTED:<br>similar to Golgi integral membrane protein 4 (Golgi phosphoprotein 4) (Golgi integral membrane protein, cis) (GIMPC) (Golgi-localized phosphoprotein of 130 kDa) (Golgi phosphoprotein of 130 kDa) isoform 2 | gi 7660779 | 81,272.00  | 100.00% | 3 | 5 | 6 | 0.05% | 5.48% | YSALNV<br>QHQLK                    | 3.64 | 1,447.74 |
| Control | 6011 | Karyopherin alpha 2 (RAG cohort 1, importin alpha 1)                                                                                                                                                                       | gi 7435474 | 57,908.80  | 100.00% | 3 | 3 | 3 | 0.02% | 9.83% | LLGATE<br>LPIVTPA<br>LR            | 3.09 | 1,563.95 |
| Control | 6011 | Karyopherin alpha 2 (RAG cohort 1, importin alpha 1)                                                                                                                                                                       | gi 7435474 | 57,908.80  | 100.00% | 3 | 3 | 3 | 0.02% | 9.83% | NKNPAP<br>PLEAIEQ<br>ILPTLVR       | 4    | 2,213.27 |
| Control | 6011 | Karyopherin alpha 2 (RAG cohort 1, importin alpha 1)                                                                                                                                                                       | gi 7435474 | 57,908.80  | 100.00% | 3 | 3 | 3 | 0.02% | 9.83% | NVSSFP<br>DDATSP<br>LQENR          | 3.58 | 1,876.87 |
| Control | 6011 | Family with sequence similarity 62 (C2 domain containin g), member A                                                                                                                                                       | gi 1173061 | 123,012.90 | 100.00% | 6 | 8 | 9 | 0.07% | 9.31% | ALTLGA<br>LTLPLAR                  | 2.63 | 1,309.82 |
| Control | 6011 | Family with sequence similarity 62 (C2 domain containin g), member A                                                                                                                                                       | gi 1173061 | 123,012.90 | 100.00% | 6 | 8 | 9 | 0.07% | 9.31% | GEGSGT<br>LGSLSLP<br>LSELLVA<br>DR | 4.89 | 2,171.16 |

|         |      |                                                                     |                           |            |         |    |    |    |       |        |                                                    |          |
|---------|------|---------------------------------------------------------------------|---------------------------|------------|---------|----|----|----|-------|--------|----------------------------------------------------|----------|
| Control | 6011 | Family with sequence similarity 62 (C2 domain containing), member A | gi 117306190,gi 118150984 | 123,012.90 | 100.00% | 6  | 8  | 9  | 0.07% | 9.31%  | LHVLEA 3.5<br>QDLIAK                               | 1,349.78 |
| Control | 6011 | Family with sequence similarity 62 (C2 domain containing), member A | gi 117306190,gi 118150984 | 123,012.90 | 100.00% | 6  | 8  | 9  | 0.07% | 9.31%  | LLAETV 3.01<br>APAVR                               | 1,139.68 |
| Control | 6011 | Family with sequence similarity 62 (C2 domain containing), member A | gi 117306190,gi 118150984 | 123,012.90 | 100.00% | 6  | 8  | 9  | 0.07% | 9.31%  | LLVPLVP 3.13<br>DLQDVA<br>QLR                      | 1,789.06 |
| Control | 6011 | Family with sequence similarity 62 (C2 domain containing), member A | gi 117306190,gi 118150984 | 123,012.90 | 100.00% | 6  | 8  | 9  | 0.07% | 9.31%  | VQLDLA 2.88<br>EIDLSQG<br>AAQWY<br>DLMDDK<br>DKGSS | 3,211.51 |
| Control | 6011 | GANAB protein                                                       | gi 151553519,gi 194679898 | 109,455.80 | 100.00% | 11 | 14 | 14 | 0.11% | 17.00% | ALLDSL 2.26<br>QLGPDA<br>LTVHLIN<br>EVTK           | 2,460.37 |
| Control | 6011 | GANAB protein                                                       | gi 151553519,gi 194679898 | 109,455.80 | 100.00% | 11 | 14 | 14 | 0.11% | 17.00% | GLLNLE 2.88<br>HQR                                 | 1,079.60 |
| Control | 6011 | GANAB protein                                                       | gi 151553519,gi 194679898 | 109,455.80 | 100.00% | 11 | 14 | 14 | 0.11% | 17.00% | KLVAIV 3.6<br>DPHIK                                | 1,232.77 |
| Control | 6011 | GANAB protein                                                       | gi 151553519,gi 194679898 | 109,455.80 | 100.00% | 11 | 14 | 14 | 0.11% | 17.00% | LKVTEG 2.88<br>GEPYR                               | 1,248.66 |
| Control | 6011 | GANAB protein                                                       | gi 151553519,gi 194679898 | 109,455.80 | 100.00% | 11 | 14 | 14 | 0.11% | 17.00% | LSFQHD 4.28<br>PETSVLI<br>LR                       | 1,754.94 |
| Control | 6011 | GANAB protein                                                       | gi 151553519,gi 194679898 | 109,455.80 | 100.00% | 11 | 14 | 14 | 0.11% | 17.00% | LVAIVDP 2.04<br>HIK                                | 1,104.68 |
| Control | 6011 | GANAB protein                                                       | gi 151553519,gi 194679898 | 109,455.80 | 100.00% | 11 | 14 | 14 | 0.11% | 17.00% | MALYGS 3.47<br>VPVLLA<br>HSPLR                     | 1,840.02 |
| Control | 6011 | GANAB protein                                                       | gi 151553519,gi 194679898 | 109,455.80 | 100.00% | 11 | 14 | 14 | 0.11% | 17.00% | MLDYLQ 4.22<br>GSGETP<br>QTDVR                     | 1,925.89 |
| Control | 6011 | GANAB protein                                                       | gi 151553519,gi 194679898 | 109,455.80 | 100.00% | 11 | 14 | 14 | 0.11% | 17.00% | QYASLT 3.83<br>GTQALP<br>PLFSLGY<br>HQSR           | 2,535.30 |

|         |      |                                                                                                                  |                                        |            |         |    |    |    |       |        |                                                |          |
|---------|------|------------------------------------------------------------------------------------------------------------------|----------------------------------------|------------|---------|----|----|----|-------|--------|------------------------------------------------|----------|
| Control | 6011 | GANAB protein                                                                                                    | gi 151553519,gi 194679898              | 109,455.80 | 100.00% | 11 | 14 | 14 | 0.11% | 17.00% | VVIIGAG 4.56<br>KPATVV<br>LQTK                 | 1,694.06 |
| Control | 6011 | GANAB protein                                                                                                    | gi 151553519,gi 194679898              | 109,455.80 | 100.00% | 11 | 14 | 14 | 0.11% | 17.00% | YHGPQT 2.62<br>LYLPVT<br>LSSIPVF<br>QR         | 2,416.30 |
| Control | 6011 | Myosin ID                                                                                                        | gi 109659303,gi 115497786,gi 122145769 | 115,924.40 | 100.00% | 4  | 4  | 4  | 0.03% | 5.57%  | DVIDKQ 3.62<br>HTEQEA<br>SYGR                  | 1,875.88 |
| Control | 6011 | Myosin ID                                                                                                        | gi 109659303,gi 115497786,gi 122145769 | 115,924.40 | 100.00% | 4  | 4  | 4  | 0.03% | 5.57%  | LNQPQP 2.71<br>DFTK                            | 1,187.61 |
| Control | 6011 | Myosin ID                                                                                                        | gi 109659303,gi 115497786,gi 122145769 | 115,924.40 | 100.00% | 4  | 4  | 4  | 0.03% | 5.57%  | LVSIAE 2.69<br>LLSTK                           | 1,286.79 |
| Control | 6011 | Myosin ID                                                                                                        | gi 109659303,gi 115497786,gi 122145769 | 115,924.40 | 100.00% | 4  | 4  | 4  | 0.03% | 5.57%  | SFHSFYQ 4.21<br>LLQGGG<br>DQMLR                | 2,130.01 |
| Control | 6011 | Chromosome 20 open reading frame 3 ortholog                                                                      | gi 74268319,gi 78369434                | 46,074.40  | 100.00% | 3  | 4  | 6  | 0.05% | 13.80% | GGADV 4.08<br>VENLPG<br>FPDNIR                 | 1,916.95 |
| Control | 6011 | Chromosome 20 open reading frame 3 ortholog                                                                      | gi 74268319,gi 78369434                | 46,074.40  | 100.00% | 3  | 4  | 6  | 0.05% | 13.80% | LFENQL 4.45<br>VGPEA<br>NIGDVM<br>FTGTAD<br>GR | 2,867.39 |
| Control | 6011 | Chromosome 20 open reading frame 3 ortholog                                                                      | gi 74268319,gi 78369434                | 46,074.40  | 100.00% | 3  | 4  | 6  | 0.05% | 13.80% | LLLSSET 4.68<br>PIEGR                          | 1,314.73 |
| Control | 6011 | RecName : Full=Pyruvate dehydrogenase E1 component subunit beta, mitochondrial; Short=P DHE1-B; Flags: Precursor | gi 116242689,gi 151556071,gi 164420789 | 39,108.20  | 100.00% | 3  | 3  | 4  | 0.03% | 12.00% | EAINQG 2.18<br>MDEELE<br>RDEK                  | 1,921.84 |



|         |      |                                                                                                                                                                                                                                                                                  |            |            |         |   |   |   |       |        |                               |          |
|---------|------|----------------------------------------------------------------------------------------------------------------------------------------------------------------------------------------------------------------------------------------------------------------------------------|------------|------------|---------|---|---|---|-------|--------|-------------------------------|----------|
| Control | 6011 | RecName<br>:<br>Full=Pyr<br>uvate<br>dehydrog<br>enase E1<br>compone<br>nt<br>subunit<br>beta,<br>mitochon<br>drial;<br>Short=P<br>DHE1-B;<br>Flags:<br>Precursor                                                                                                                | gi 1162426 | 39,108.20  | 100.00% | 3 | 3 | 4 | 0.03% | 12.00% | ILEDNSV 2.59<br>PQVK          | 1,241.67 |
| Control | 6011 | RecName<br>:<br>Full=Pyr<br>uvate<br>dehydrog<br>enase E1<br>compone<br>nt<br>subunit<br>beta,<br>mitochon<br>drial;<br>Short=P<br>DHE1-B;<br>Flags:<br>Precursor                                                                                                                | gi 1162426 | 39,108.20  | 100.00% | 3 | 3 | 4 | 0.03% | 12.00% | IMEGPAF 3.62<br>NFLDAP<br>AVR | 1,763.88 |
| Control | 6011 | PREDIC<br>TED:<br>similar to<br>Alpha-<br>mannosid<br>ase 2<br>(Alpha-<br>mannosid<br>ase II)<br>(Mannos<br>yl-<br>oligosacc<br>haride<br>1,3-1,6-<br>alpha-<br>mannosid<br>ase)<br>(MAN II)<br>(Golgi<br>alpha-<br>mannosid<br>ase II)<br>(Mannosi<br>dase<br>alpha<br>class 2A | gi 1198960 | 130,855.40 | 100.00% | 5 | 6 | 6 | 0.05% | 5.94%  | AEMLLD 2.68<br>QYR            | 1,154.55 |

|         |      |                                                                                                                                                                                                                        |            |            |         |   |   |   |       |       |                              |          |
|---------|------|------------------------------------------------------------------------------------------------------------------------------------------------------------------------------------------------------------------------|------------|------------|---------|---|---|---|-------|-------|------------------------------|----------|
| Control | 6011 | PREDIC TED: 06<br>similar to<br>Alpha-mannosidase 2<br>(Alpha-mannosidase II)<br>(Mannosyl-oligosaccharide<br>1,3-1,6-alpha-mannosidase)<br>(MAN II)<br>(Golgi alpha-mannosidase II)<br>(Mannosidase<br>alpha class 2A | gi 1198960 | 130,855.40 | 100.00% | 5 | 6 | 6 | 0.05% | 5.94% | IQFGTLS 2.87<br>DYFDAL<br>EK | 1,746.86 |
| Control | 6011 | PREDIC TED: 06<br>similar to<br>Alpha-mannosidase 2<br>(Alpha-mannosidase II)<br>(Mannosyl-oligosaccharide<br>1,3-1,6-alpha-mannosidase)<br>(MAN II)<br>(Golgi alpha-mannosidase II)<br>(Mannosidase<br>alpha class 2A | gi 1198960 | 130,855.40 | 100.00% | 5 | 6 | 6 | 0.05% | 5.94% | TQYIFNN 3.37<br>MVVK         | 1,372.69 |

|         |      |                                                                                                                                                                                                                        |                             |            |         |   |   |   |       |        |                                                  |      |          |
|---------|------|------------------------------------------------------------------------------------------------------------------------------------------------------------------------------------------------------------------------|-----------------------------|------------|---------|---|---|---|-------|--------|--------------------------------------------------|------|----------|
| Control | 6011 | PREDIC TED: 06<br>similar to<br>Alpha-mannosidase 2<br>(Alpha-mannosidase II)<br>(Mannosyl-oligosaccharide<br>1,3-1,6-alpha-mannosidase)<br>(MAN II)<br>(Golgi alpha-mannosidase II)<br>(Mannosidase<br>alpha class 2A | gi 1198960                  | 130,855.40 | 100.00% | 5 | 6 | 6 | 0.05% | 5.94%  | TTVVLA<br>PLGDDF<br>R                            | 3.41 | 1,403.75 |
| Control | 6011 | PREDIC TED: 06<br>similar to<br>Alpha-mannosidase 2<br>(Alpha-mannosidase II)<br>(Mannosyl-oligosaccharide<br>1,3-1,6-alpha-mannosidase)<br>(MAN II)<br>(Golgi alpha-mannosidase II)<br>(Mannosidase<br>alpha class 2A | gi 1198960                  | 130,855.40 | 100.00% | 5 | 6 | 6 | 0.05% | 5.94%  | YDLYNG<br>NIANEKI<br>FNMNNI<br>K                 | 3.72 | 2,333.09 |
| Control | 6011 | RecName :<br>Full=Mitochondrial fission factor                                                                                                                                                                         | gi 1221409<br>: 19,gi 14874 | 29,683.40  | 100.00% | 4 | 5 | 6 | 0.05% | 37.50% | IVVAGN<br>NEDIPFS<br>RPADLD<br>LIQSTPF<br>KPLALK | 2.92 | 3,478.89 |
| Control | 6011 | RecName :<br>Full=Mitochondrial fission factor                                                                                                                                                                         | gi 1221409<br>: 19,gi 14874 | 29,683.40  | 100.00% | 4 | 5 | 6 | 0.05% | 37.50% | RLQLE<br>EENKER                                  | 4.26 | 1,556.84 |
| Control | 6011 | RecName :<br>Full=Mitochondrial fission factor                                                                                                                                                                         | gi 1221409<br>: 19,gi 14874 | 29,683.40  | 100.00% | 4 | 5 | 6 | 0.05% | 37.50% | VAPPNA<br>DLEQGF<br>QEGVSN<br>ASVIMQ<br>VPER     | 2.94 | 2,998.46 |

|         |      |                                                                                                                                                                                                                                                                                      |                                                                                                                                                                                       |           |         |   |   |    |       |        |                                              |          |
|---------|------|--------------------------------------------------------------------------------------------------------------------------------------------------------------------------------------------------------------------------------------------------------------------------------------|---------------------------------------------------------------------------------------------------------------------------------------------------------------------------------------|-----------|---------|---|---|----|-------|--------|----------------------------------------------|----------|
| Control | 6011 | RecName<br>:<br>Full=Mit<br>ochondri<br>al fission<br>factor                                                                                                                                                                                                                         | gi 1221409<br>19,gi 14874<br>4119,gi 735<br>86594,gi 77<br>735489                                                                                                                     | 29,683.40 | 100.00% | 4 | 5 | 6  | 0.05% | 37.50% | VLTLSER 5.08<br>PLDFLDL<br>ERPAPTP<br>QNEEIR | 3,148.66 |
| Control | 6011 | RecName<br>:<br>Full=Cyt<br>ochrome<br>c oxidase<br>subunit 4<br>isoform<br>1,<br>mitochon<br>drial;<br>AltName:<br>Full=Cyt<br>ochrome<br>c oxidase<br>subunit<br>IV<br>isoform<br>1;<br>Short=C<br>OX IV-1;<br>AltName:<br>Full=Cyt<br>ochrome<br>c oxidase<br>polypepti<br>de IV; | gi 117085,g<br>i 14924153<br>9,gi 149241<br>552,gi 1492<br>41569,gi 14<br>9241582,gi <br>149241599,<br>gi 1492416<br>12,gi 47824<br>862,gi 5063<br>89,gi 59858<br>423,gi 7435<br>4123 | 19,554.00 | 100.00% | 4 | 5 | 16 | 0.13% | 20.10% | DYPLPD 2.62<br>VAHVK                         | 1,253.65 |
| Control | 6011 | RecName<br>:<br>Full=Cyt<br>ochrome<br>c oxidase<br>subunit 4<br>isoform<br>1,<br>mitochon<br>drial;<br>AltName:<br>Full=Cyt<br>ochrome<br>c oxidase<br>subunit<br>IV<br>isoform<br>1;<br>Short=C<br>OX IV-1;<br>AltName:<br>Full=Cyt<br>ochrome<br>c oxidase<br>polypepti<br>de IV; | gi 117085,g<br>i 14924153<br>9,gi 149241<br>552,gi 1492<br>41569,gi 14<br>9241582,gi <br>149241599,<br>gi 1492416<br>12,gi 47824<br>862,gi 5063<br>89,gi 59858<br>423,gi 7435<br>4123 | 19,554.00 | 100.00% | 4 | 5 | 16 | 0.13% | 20.10% | FKESFAE 3.92<br>MNR                          | 1,274.58 |

|         |      |                                                                                                                                                                                                                                                                                      |                                                                                                                                                                                        |            |         |   |    |    |       |        |                               |          |
|---------|------|--------------------------------------------------------------------------------------------------------------------------------------------------------------------------------------------------------------------------------------------------------------------------------------|----------------------------------------------------------------------------------------------------------------------------------------------------------------------------------------|------------|---------|---|----|----|-------|--------|-------------------------------|----------|
| Control | 6011 | RecName<br>:<br>Full=Cyt<br>ochrome<br>c oxidase<br>subunit 4<br>isoform<br>1,<br>mitochon<br>drial;<br>AltName:<br>Full=Cyt<br>ochrome<br>c oxidase<br>subunit<br>IV<br>isoform<br>1;<br>Short=C<br>OX IV-1;<br>AltName:<br>Full=Cyt<br>ochrome<br>c oxidase<br>polypepti<br>de IV; | gi 117085.g<br>ij 14924153<br>9,gi 149241<br>552,gi 1492<br>41569,gi 14<br>9241582,gi <br>149241599,<br>gi 1492416<br>12,gi 47824<br>862,gi 5063<br>89,gi 59858<br>423,gi 7435<br>4123 | 19,554.00  | 100.00% | 4 | 5  | 16 | 0.13% | 20.10% | SEDYAL 3.66<br>PSYVDR         | 1,414.65 |
| Control | 6011 | RecName<br>:<br>Full=Cyt<br>ochrome<br>c oxidase<br>subunit 4<br>isoform<br>1,<br>mitochon<br>drial;<br>AltName:<br>Full=Cyt<br>ochrome<br>c oxidase<br>polypepti<br>de IV;                                                                                                          | gi 117085.g<br>ij 14924153<br>9,gi 149241<br>552,gi 1492<br>41569,gi 14<br>9241582,gi <br>149241599,<br>gi 1492416<br>12,gi 47824<br>862,gi 5063<br>89,gi 59858<br>423,gi 7435<br>4123 | 19,554.00  | 100.00% | 4 | 5  | 16 | 0.13% | 20.10% | SEDYAL 2.06<br>PSYVDR<br>R    | 1,570.75 |
| Control | 6011 | ERAP1<br>protein                                                                                                                                                                                                                                                                     | gi 1544256<br>37,gi 15612<br>0653                                                                                                                                                      | 107,090.40 | 99.80%  | 2 | 2  | 2  | 0.02% | 2.55%  | ASLINNA 3.46<br>FQLVSIK<br>K  | 1,574.89 |
| Control | 6011 | ERAP1<br>protein                                                                                                                                                                                                                                                                     | gi 1544256<br>37,gi 15612<br>0653                                                                                                                                                      | 107,090.40 | 99.80%  | 2 | 2  | 2  | 0.02% | 2.55%  | TQEFPDI 2.4<br>LR             | 1,118.58 |
| Control | 6011 | Canx<br>protein                                                                                                                                                                                                                                                                      | gi 1572791<br>43,gi 15778<br>5567                                                                                                                                                      | 67,759.10  | 100.00% | 8 | 12 | 27 | 0.21% | 15.00% | APVPTG 4.34<br>EVYFAD<br>SFDR | 1,770.83 |
| Control | 6011 | Canx<br>protein                                                                                                                                                                                                                                                                      | gi 1572791<br>43,gi 15778<br>5567                                                                                                                                                      | 67,759.10  | 100.00% | 8 | 12 | 27 | 0.21% | 15.00% | IPNPDF 3.98<br>EDLEPFK        | 1,707.83 |
| Control | 6011 | Canx<br>protein                                                                                                                                                                                                                                                                      | gi 1572791<br>43,gi 15778<br>5567                                                                                                                                                      | 67,759.10  | 100.00% | 8 | 12 | 27 | 0.21% | 15.00% | KIPNPDF 5.42<br>FEDLEPF<br>K  | 1,835.92 |
| Control | 6011 | Canx<br>protein                                                                                                                                                                                                                                                                      | gi 1572791<br>43,gi 15778<br>5567                                                                                                                                                      | 67,759.10  | 100.00% | 8 | 12 | 27 | 0.21% | 15.00% | LPGDKG 2.97<br>LVLMSR         | 1,301.72 |

|         |      |                                                  |                                        |            |         |    |    |    |       |        |                                       |      |          |
|---------|------|--------------------------------------------------|----------------------------------------|------------|---------|----|----|----|-------|--------|---------------------------------------|------|----------|
| Control | 6011 | Canx protein                                     | gi 157279143,gi 157785567              | 67,759.10  | 100.00% | 8  | 12 | 27 | 0.21% | 15.00% | TDAPQP<br>DVKEDE<br>EEKEEE<br>K       | 3.39 | 2,245.00 |
| Control | 6011 | Canx protein                                     | gi 157279143,gi 157785567              | 67,759.10  | 100.00% | 8  | 12 | 27 | 0.21% | 15.00% | TPELNL<br>DQFHDK                      | 4.06 | 1,456.71 |
| Control | 6011 | Canx protein                                     | gi 157279143,gi 157785567              | 67,759.10  | 100.00% | 8  | 12 | 27 | 0.21% | 15.00% | TPELNL<br>DQFHDK<br>TPYTIMF<br>GPKD   | 5.11 | 2,723.30 |
| Control | 6011 | Canx protein                                     | gi 157279143,gi 157785567              | 67,759.10  | 100.00% | 8  | 12 | 27 | 0.21% | 15.00% | VTYKAP<br>VPTGEV<br>YFADSF<br>DR      | 3.64 | 2,262.11 |
| Control | 6011 | Nucleobindin 1                                   | gi 112362164,gi 115497814,gi 122142168 | 54,964.80  | 100.00% | 7  | 9  | 12 | 0.09% | 23.60% | ELQQAV<br>LQMEQR                      | 3.64 | 1,488.75 |
| Control | 6011 | Nucleobindin 1                                   | gi 112362164,gi 115497814,gi 122142168 | 54,964.80  | 100.00% | 7  | 9  | 12 | 0.09% | 23.60% | KQQQQS<br>HNNPAP<br>GPEGQL<br>K       | 3.16 | 2,086.04 |
| Control | 6011 | Nucleobindin 1                                   | gi 112362164,gi 115497814,gi 122142168 | 54,964.80  | 100.00% | 7  | 9  | 12 | 0.09% | 23.60% | LVTLEEF<br>LASTQR                     | 3.5  | 1,506.82 |
| Control | 6011 | Nucleobindin 1                                   | gi 112362164,gi 115497814,gi 122142168 | 54,964.80  | 100.00% | 7  | 9  | 12 | 0.09% | 23.60% | QFEHLD<br>PQNQHT<br>FEAR              | 2.87 | 1,996.93 |
| Control | 6011 | Nucleobindin 1                                   | gi 112362164,gi 115497814,gi 122142168 | 54,964.80  | 100.00% | 7  | 9  | 12 | 0.09% | 23.60% | TFFILHDI<br>NSDGVL<br>DEQELE<br>ALFTK | 3.53 | 2,894.45 |
| Control | 6011 | Nucleobindin 1                                   | gi 112362164,gi 115497814,gi 122142168 | 54,964.80  | 100.00% | 7  | 9  | 12 | 0.09% | 23.60% | YLESLG<br>EEQRK                       | 3.29 | 1,351.69 |
| Control | 6011 | Nucleobindin 1                                   | gi 112362164,gi 115497814,gi 122142168 | 54,964.80  | 100.00% | 7  | 9  | 12 | 0.09% | 23.60% | YLQEVI<br>NVLETD<br>GHFR              | 4.06 | 1,932.98 |
| Control | 6011 | nicalin                                          | gi 115494944,gi 94534903               | 63,091.10  | 100.00% | 3  | 3  | 3  | 0.02% | 8.72%  | AAQLVD<br>KDGTF<br>STLEHY<br>LSR      | 6.57 | 2,364.22 |
| Control | 6011 | nicalin                                          | gi 115494944,gi 94534903               | 63,091.10  | 100.00% | 3  | 3  | 3  | 0.02% | 8.72%  | ELETVA<br>AHQFPE<br>VR                | 4.36 | 1,625.83 |
| Control | 6011 | nicalin                                          | gi 115494944,gi 94534903               | 63,091.10  | 100.00% | 3  | 3  | 3  | 0.02% | 8.72%  | MQQYDL<br>QGQPYG<br>TR                | 3.55 | 1,700.77 |
| Control | 6011 | embryo-specific fibronectin 1 transcript variant | gi 220028657,gi 76610126               | 262,401.30 | 100.00% | 21 | 27 | 37 | 0.29% | 17.90% | DDKESV<br>PISDTIP<br>AVPPPT<br>DLR    | 3.53 | 2,475.30 |
| Control | 6011 | embryo-specific fibronectin 1 transcript variant | gi 220028657,gi 76610126               | 262,401.30 | 100.00% | 21 | 27 | 37 | 0.29% | 17.90% | DLQFVE<br>VTDVK                       | 2.68 | 1,292.67 |

|         |      |                                                  |                          |            |         |    |    |    |       |        |                                                 |      |          |
|---------|------|--------------------------------------------------|--------------------------|------------|---------|----|----|----|-------|--------|-------------------------------------------------|------|----------|
| Control | 6011 | embryo-specific fibronectin 1 transcript variant | gi 220028657,gi 76610126 | 262,401.30 | 100.00% | 21 | 27 | 37 | 0.29% | 17.90% | GATYNII<br>VEAVK                                | 2.99 | 1,277.71 |
| Control | 6011 | embryo-specific fibronectin 1 transcript variant | gi 220028657,gi 76610126 | 262,401.30 | 100.00% | 21 | 27 | 37 | 0.29% | 17.90% | GDSPAS<br>SKPVSIN<br>YR                         | 4.25 | 1,577.79 |
| Control | 6011 | embryo-specific fibronectin 1 transcript variant | gi 220028657,gi 76610126 | 262,401.30 | 100.00% | 21 | 27 | 37 | 0.29% | 17.90% | GFNCES<br>KPEPEET<br>CFDKYT<br>GNTYR            | 3.31 | 2,815.20 |
| Control | 6011 | embryo-specific fibronectin 1 transcript variant | gi 220028657,gi 76610126 | 262,401.30 | 100.00% | 21 | 27 | 37 | 0.29% | 17.90% | GLAFTD<br>VDVDSI<br>K                           | 3.47 | 1,379.71 |
| Control | 6011 | embryo-specific fibronectin 1 transcript variant | gi 220028657,gi 76610126 | 262,401.30 | 100.00% | 21 | 27 | 37 | 0.29% | 17.90% | GLRPGV<br>VYEQQL<br>ISVQHY<br>GQR               | 5.08 | 2,356.25 |
| Control | 6011 | embryo-specific fibronectin 1 transcript variant | gi 220028657,gi 76610126 | 262,401.30 | 100.00% | 21 | 27 | 37 | 0.29% | 17.90% | KKTDEL<br>PQLVTLP<br>HPNLHG<br>PEILDVP<br>STVQK | 2.77 | 3,443.89 |
| Control | 6011 | embryo-specific fibronectin 1 transcript variant | gi 220028657,gi 76610126 | 262,401.30 | 100.00% | 21 | 27 | 37 | 0.29% | 17.90% | NLQPGS<br>EYAVSL<br>VAVK                        | 3.8  | 1,674.91 |
| Control | 6011 | embryo-specific fibronectin 1 transcript variant | gi 220028657,gi 76610126 | 262,401.30 | 100.00% | 21 | 27 | 37 | 0.29% | 17.90% | NSITLTN<br>LNPGTE<br>YVVSIV<br>ALNSK            | 4.16 | 2,547.37 |
| Control | 6011 | embryo-specific fibronectin 1 transcript variant | gi 220028657,gi 76610126 | 262,401.30 | 100.00% | 21 | 27 | 37 | 0.29% | 17.90% | NTFAEV<br>TGLSPG<br>VTYHFK                      | 5.44 | 1,967.99 |
| Control | 6011 | embryo-specific fibronectin 1 transcript variant | gi 220028657,gi 76610126 | 262,401.30 | 100.00% | 21 | 27 | 37 | 0.29% | 17.90% | QYNVGP<br>AASQYP<br>LR                          | 4.15 | 1,563.79 |
| Control | 6011 | embryo-specific fibronectin 1 transcript variant | gi 220028657,gi 76610126 | 262,401.30 | 100.00% | 21 | 27 | 37 | 0.29% | 17.90% | RPGAEP<br>GNEGST<br>AHSYNQ<br>YSQR              | 4.9  | 2,406.08 |

|         |      |                                                  |                                       |            |         |    |    |    |       |        |                                                                  |      |          |
|---------|------|--------------------------------------------------|---------------------------------------|------------|---------|----|----|----|-------|--------|------------------------------------------------------------------|------|----------|
| Control | 6011 | embryo-specific fibronectin 1 transcript variant | gi 220028657,gi 76610126              | 262,401.30 | 100.00% | 21 | 27 | 37 | 0.29% | 17.90% | SSPVVID<br>ASTAIDA<br>PSNLR                                      | 2.87 | 1,913.00 |
| Control | 6011 | embryo-specific fibronectin 1 transcript variant | gi 220028657,gi 76610126              | 262,401.30 | 100.00% | 21 | 27 | 37 | 0.29% | 17.90% | SYTITGL<br>QPGTDY<br>K                                           | 3.69 | 1,543.76 |
| Control | 6011 | embryo-specific fibronectin 1 transcript variant | gi 220028657,gi 76610126              | 262,401.30 | 100.00% | 21 | 27 | 37 | 0.29% | 17.90% | TEIDKPS<br>QMQVT<br>DVQDNS<br>ISVR                               | 4.71 | 2,506.21 |
| Control | 6011 | embryo-specific fibronectin 1 transcript variant | gi 220028657,gi 76610126              | 262,401.30 | 100.00% | 21 | 27 | 37 | 0.29% | 17.90% | TKTETIT<br>GFQVDA<br>IPANGQT<br>PIQR                             | 3.42 | 2,586.35 |
| Control | 6011 | embryo-specific fibronectin 1 transcript variant | gi 220028657,gi 76610126              | 262,401.30 | 100.00% | 21 | 27 | 37 | 0.29% | 17.90% | TPFITNP<br>GYDTGN<br>GIQLPGT<br>SGQQPS<br>LGQQMI<br>FEEHGF<br>RR | 2.93 | 4,392.11 |
| Control | 6011 | embryo-specific fibronectin 1 transcript variant | gi 220028657,gi 76610126              | 262,401.30 | 100.00% | 21 | 27 | 37 | 0.29% | 17.90% | VDVIPV<br>NLPGEH<br>GQR                                          | 3.97 | 1,629.87 |
| Control | 6011 | embryo-specific fibronectin 1 transcript variant | gi 220028657,gi 76610126              | 262,401.30 | 100.00% | 21 | 27 | 37 | 0.29% | 17.90% | VEYELS<br>EEGDEP<br>QYLDLP<br>STATSV<br>NIPDLLP<br>GRK           | 5.29 | 3,774.86 |
| Control | 6011 | embryo-specific fibronectin 1 transcript variant | gi 220028657,gi 76610126              | 262,401.30 | 100.00% | 21 | 27 | 37 | 0.29% | 17.90% | VPGTSA<br>SATLTG<br>LTR                                          | 4.23 | 1,431.78 |
| Control | 6011 | translocation of outer mitochondrial membrane 40 | gi 115495635,gi 122134275,gi 94534905 | 37,707.00  | 100.00% | 6  | 7  | 15 | 0.12% | 29.60% | KLPLPL<br>TLALGA<br>FLNHR                                        | 2.02 | 1,971.19 |
| Control | 6011 | translocation of outer mitochondrial membrane 40 | gi 115495635,gi 122134275,gi 94534905 | 37,707.00  | 100.00% | 6  | 7  | 15 | 0.12% | 29.60% | KLPLPL<br>TLALGA<br>FLNHRK                                       | 2.9  | 2,099.29 |
| Control | 6011 | translocation of outer mitochondrial membrane 40 | gi 115495635,gi 122134275,gi 94534905 | 37,707.00  | 100.00% | 6  | 7  | 15 | 0.12% | 29.60% | MQDTSV<br>SFGYQL<br>DLPK                                         | 3.82 | 1,844.87 |



|         |      |                                                                   |                                       |            |         |    |    |    |       |        |                                                        |      |          |
|---------|------|-------------------------------------------------------------------|---------------------------------------|------------|---------|----|----|----|-------|--------|--------------------------------------------------------|------|----------|
| Control | 6011 | translocase of outer mitochondrial membrane 40                    | gi 115495635,gi 122134275,gi 94534905 | 37,707.00  | 100.00% | 6  | 7  | 15 | 0.12% | 29.60% | QLSPTEA<br>FPVLVG<br>DMDNSG<br>SLNAQVI<br>HQLGPG<br>LR | 3.37 | 3,576.81 |
| Control | 6011 | translocase of outer mitochondrial membrane 40                    | gi 115495635,gi 122134275,gi 94534905 | 37,707.00  | 100.00% | 6  | 7  | 15 | 0.12% | 29.60% | RPGEEG<br>AVMSLA<br>GK                                 | 3.51 | 1,417.71 |
| Control | 6011 | translocase of outer mitochondrial membrane 40                    | gi 115495635,gi 122134275,gi 94534905 | 37,707.00  | 100.00% | 6  | 7  | 15 | 0.12% | 29.60% | YTLNNW<br>LATVTL<br>GQAGM<br>HATYYH<br>K               | 4.03 | 2,769.35 |
| Control | 6011 | PREDICTED: ATPase, Ca++ transporting, plasma membrane 4 isoform 5 | gi 119908026                          | 133,777.70 | 100.00% | 11 | 13 | 14 | 0.11% | 12.70% | ADVGFA<br>MGIAGT<br>DVAK                               | 4.08 | 1,538.75 |
| Control | 6011 | PREDICTED: ATPase, Ca++ transporting, plasma membrane 4 isoform 5 | gi 119908026                          | 133,777.70 | 100.00% | 11 | 13 | 14 | 0.11% | 12.70% | EASDIIIL<br>TDDNFT<br>SIVK                             | 2.96 | 1,880.95 |
| Control | 6011 | PREDICTED: ATPase, Ca++ transporting, plasma membrane 4 isoform 5 | gi 119908026                          | 133,777.70 | 100.00% | 11 | 13 | 14 | 0.11% | 12.70% | GIIDSTV<br>GDQR                                        | 3.24 | 1,160.59 |
| Control | 6011 | PREDICTED: ATPase, Ca++ transporting, plasma membrane 4 isoform 5 | gi 119908026                          | 133,777.70 | 100.00% | 11 | 13 | 14 | 0.11% | 12.70% | IDESSLT<br>GESDHV<br>KK                                | 3.29 | 1,644.81 |

|         |      |                                                                   |              |            |         |    |    |    |       |        |                                        |      |          |
|---------|------|-------------------------------------------------------------------|--------------|------------|---------|----|----|----|-------|--------|----------------------------------------|------|----------|
| Control | 6011 | PREDICTED: ATPase, Ca++ transporting, plasma membrane 4 isoform 5 | gi 119908026 | 133,777.70 | 100.00% | 11 | 13 | 14 | 0.11% | 12.70% | KADVGF<br>AMGIAG<br>TDVAK              | 4.38 | 1,666.85 |
| Control | 6011 | PREDICTED: ATPase, Ca++ transporting, plasma membrane 4 isoform 5 | gi 119908026 | 133,777.70 | 100.00% | 11 | 13 | 14 | 0.11% | 12.70% | LKTNPV<br>EGLSGN<br>PADLEK             | 4.95 | 1,881.99 |
| Control | 6011 | PREDICTED: ATPase, Ca++ transporting, plasma membrane 4 isoform 5 | gi 119908026 | 133,777.70 | 100.00% | 11 | 13 | 14 | 0.11% | 12.70% | QVVAVT<br>GDGTND<br>GPALKK             | 4.19 | 1,769.94 |
| Control | 6011 | PREDICTED: ATPase, Ca++ transporting, plasma membrane 4 isoform 5 | gi 119908026 | 133,777.70 | 100.00% | 11 | 13 | 14 | 0.11% | 12.70% | TNPVEG<br>LSGNPA<br>DLEK               | 4.43 | 1,640.81 |
| Control | 6011 | PREDICTED: ATPase, Ca++ transporting, plasma membrane 4 isoform 5 | gi 119908026 | 133,777.70 | 100.00% | 11 | 13 | 14 | 0.11% | 12.70% | TPLLDE<br>QEEEIFE<br>K                 | 3.24 | 1,719.83 |
| Control | 6011 | PREDICTED: ATPase, Ca++ transporting, plasma membrane 4 isoform 5 | gi 119908026 | 133,777.70 | 100.00% | 11 | 13 | 14 | 0.11% | 12.70% | TQDGVA<br>LEIQPLN<br>SQEGIDS<br>EEKEKK | 4.03 | 2,885.44 |
| Control | 6011 | PREDICTED: ATPase, Ca++ transporting, plasma membrane 4 isoform 5 | gi 119908026 | 133,777.70 | 100.00% | 11 | 13 | 14 | 0.11% | 12.70% | YGDLLP<br>ADGILIQ<br>GNDLK             | 3.62 | 1,915.02 |

|         |      |                                                                      |                                                                                         |           |         |   |   |    |       |        |                             |      |          |
|---------|------|----------------------------------------------------------------------|-----------------------------------------------------------------------------------------|-----------|---------|---|---|----|-------|--------|-----------------------------|------|----------|
| Control | 6011 | Calcium binding atopy-related autoantigen 1                          | gi 113912006,gi 115496574,gi 122142150                                                  | 54,406.00 | 99.80%  | 2 | 2 | 2  | 0.02% | 7.11%  | GLTFQE<br>VENFFTF<br>LK     | 2.1  | 1,819.93 |
| Control | 6011 | Calcium binding atopy-related autoantigen 1                          | gi 113912006,gi 115496574,gi 122142150                                                  | 54,406.00 | 99.80%  | 2 | 2 | 2  | 0.02% | 7.11%  | WISEHGE<br>SEVFMT<br>PQDFVR | 3.34 | 2,223.04 |
| Control | 6011 | PREDICTED: BCL2/adenovirus E1B 19kDa interacting protein 1 isoform 1 | gi 194676367,gi 194676369                                                               | 22,279.70 | 99.80%  | 2 | 2 | 2  | 0.02% | 18.60% | ESLAQTS<br>SAITESL<br>MGISR | 3.81 | 1,996.99 |
| Control | 6011 | PREDICTED: BCL2/adenovirus E1B 19kDa interacting protein 1 isoform 1 | gi 194676367,gi 194676369                                                               | 22,279.70 | 99.80%  | 2 | 2 | 2  | 0.02% | 18.60% | IQELEQS<br>AKEQDK<br>ESEK   | 3.05 | 2,018.99 |
| Control | 6011 | PREDICTED: similar to histone H2aj cluster 1, H2aj                   | gi 119915559,gi 119915725,gi 119939855,gi 198282091,gi 76619954,gi 76631269,gi 76633542 | 14,074.00 | 100.00% | 6 | 8 | 27 | 0.21% | 57.70% | AGLQFP<br>VGR               | 3    | 944.5313 |
| Control | 6011 | PREDICTED: similar to histone H2aj cluster 1, H2aj                   | gi 119915559,gi 119915725,gi 119939855,gi 198282091,gi 76619954,gi 76631269,gi 76633542 | 14,074.00 | 100.00% | 6 | 8 | 27 | 0.21% | 57.70% | HLQLAIR                     | 2.19 | 850.5258 |
| Control | 6011 | PREDICTED: similar to histone H2aj cluster 1, H2aj                   | gi 119915559,gi 119915725,gi 119939855,gi 198282091,gi 76619954,gi 76631269,gi 76633542 | 14,074.00 | 100.00% | 6 | 8 | 27 | 0.21% | 57.70% | HLQLAIR<br>NDEELN<br>K      | 3.13 | 1,692.90 |
| Control | 6011 | PREDICTED: similar to histone H2aj cluster 1, H2aj                   | gi 119915559,gi 119915725,gi 119939855,gi 198282091,gi 76619954,gi 76631269,gi 76633542 | 14,074.00 | 100.00% | 6 | 8 | 27 | 0.21% | 57.70% | NDEELN<br>KLLGK             | 3.51 | 1,272.68 |

|         |      |                                                        |                                                                                         |           |         |   |   |    |       |        |                                                    |          |
|---------|------|--------------------------------------------------------|-----------------------------------------------------------------------------------------|-----------|---------|---|---|----|-------|--------|----------------------------------------------------|----------|
| Control | 6011 | PREDIC TED: similar to histone cluster 1, H2aj         | gi 119915559,gi 119915725,gi 119939855,gi 198282091,gi 76619954,gi 76631269,gi 76633542 | 14,074.00 | 100.00% | 6 | 8 | 27 | 0.21% | 57.70% | VGAGAP 6.5<br>VYLAADV<br>LEYLTA<br>EILELAG<br>NAAR | 2,915.59 |
| Control | 6011 | PREDIC TED: similar to histone cluster 1, H2aj         | gi 119915559,gi 119915725,gi 119939855,gi 198282091,gi 76619954,gi 76631269,gi 76633542 | 14,074.00 | 100.00% | 6 | 8 | 27 | 0.21% | 57.70% | VTIAQG 5.62<br>GVLPNIQ<br>AVLLPK                   | 1,931.17 |
| Control | 6011 | RecName : Full=Prot easome subunit alpha type-1        | gi 122140416,gi 74354782,gi 78369458                                                    | 29,568.00 | 99.90%  | 2 | 3 | 4  | 0.03% | 12.20% | FVFDRPL 2.78<br>PVSR                               | 1,332.74 |
| Control | 6011 | RecName : Full=Prot easome subunit alpha type-1        | gi 122140416,gi 74354782,gi 78369458                                                    | 29,568.00 | 99.90%  | 2 | 3 | 4  | 0.03% | 12.20% | KAQPTQ 4.04<br>PADEPA<br>EKADEP<br>MEH             | 2,335.05 |
| Control | 6011 | Plexin domain containin g 2                            | gi 117306639,gi 118150958                                                               | 59,450.20 | 100.00% | 4 | 4 | 4  | 0.03% | 12.40% | EIPVLVT 5.09<br>QISSTNH<br>PVK                     | 1,862.04 |
| Control | 6011 | Plexin domain containin g 2                            | gi 117306639,gi 118150958                                                               | 59,450.20 | 100.00% | 4 | 4 | 4  | 0.03% | 12.40% | GSGHPA 3.3<br>YAEVEP<br>VGEK                       | 1,626.78 |
| Control | 6011 | Plexin domain containin g 2                            | gi 117306639,gi 118150958                                                               | 59,450.20 | 100.00% | 4 | 4 | 4  | 0.03% | 12.40% | MLTATQ 4.82<br>YIAPLM<br>ANFDPS<br>VSR             | 2,342.15 |
| Control | 6011 | Plexin domain containin g 2                            | gi 117306639,gi 118150958                                                               | 59,450.20 | 100.00% | 4 | 4 | 4  | 0.03% | 12.40% | VGLSDA 4.15<br>FVVVHR                              | 1,298.72 |
| Control | 6011 | RecName : Full=OCI A domain-5471 containin g protein 2 | gi 122140146,gi 74353966,gi 7773                                                        | 16,827.50 | 99.80%  | 2 | 2 | 3  | 0.02% | 14.30% | FHSFEG 2.89<br>QLR                                 | 1,120.55 |
| Control | 6011 | RecName : Full=OCI A domain-5471 containin g protein 2 | gi 122140146,gi 74353966,gi 7773                                                        | 16,827.50 | 99.80%  | 2 | 2 | 3  | 0.02% | 14.30% | VALAGIL 3.79<br>GFGLGK                             | 1,215.75 |

|         |      |                                                                                                                                                                                                                                                                                                         |                                                                   |           |         |    |    |    |       |        |                                                     |          |
|---------|------|---------------------------------------------------------------------------------------------------------------------------------------------------------------------------------------------------------------------------------------------------------------------------------------------------------|-------------------------------------------------------------------|-----------|---------|----|----|----|-------|--------|-----------------------------------------------------|----------|
| Control | 6011 | RecName<br>:<br>Full=Cat<br>hepsin D; 22<br>Flags:<br>Precursor                                                                                                                                                                                                                                         | gi 1363791<br>4,gi 194679<br>949,gi 2995                          | 37,693.30 | 99.80%  | 2  | 2  | 2  | 0.02% | 9.54%  | AQPGGE 3.3<br>LMLGGT<br>DSK                         | 1,476.70 |
| Control | 6011 | RecName<br>:<br>Full=Cat<br>hepsin D; 22<br>Flags:<br>Precursor                                                                                                                                                                                                                                         | gi 1363791<br>4,gi 194679<br>949,gi 2995                          | 37,693.30 | 99.80%  | 2  | 2  | 2  | 0.02% | 9.54%  | QTFGEAI 3.02<br>KQPGVV<br>FIAAK                     | 1,904.06 |
| Control | 6011 | RecName<br>:<br>Full=Doli<br>chyl-<br>diphosph<br>ooligosac<br>charide--<br>protein<br>glycosyltr<br>ansferase<br>subunit<br>2;<br>AltName:<br>Full=Doli<br>chyl-<br>diphosph<br>ooligosac<br>charide--<br>protein<br>glycosyltr<br>ansferase<br>63 kDa<br>subunit;<br>AltName:<br>Full=Rib<br>ophorin- | gi 1221402<br>31,gi 14623<br>1756,gi 742<br>67729,gi 77<br>736155 | 69,197.20 | 100.00% | 16 | 23 | 43 | 0.34% | 39.00% | ASLDRPF 3.8<br>TSLESAF<br>YSIVGLS<br>SLGAQV<br>PDVK | 3,254.69 |
| Control | 6011 | RecName<br>:<br>Full=Doli<br>chyl-<br>diphosph<br>ooligosac<br>charide--<br>protein<br>glycosyltr<br>ansferase<br>subunit<br>2;<br>AltName:<br>Full=Doli<br>chyl-<br>diphosph<br>ooligosac<br>charide--<br>protein<br>glycosyltr<br>ansferase<br>63 kDa<br>subunit;<br>AltName:<br>Full=Rib<br>ophorin- | gi 1221402<br>31,gi 14623<br>1756,gi 742<br>67729,gi 77<br>736155 | 69,197.20 | 100.00% | 16 | 23 | 43 | 0.34% | 39.00% | EETVLA 4.38<br>TVQALQ<br>TASYLS<br>QQADLR           | 2,635.36 |



|         |      |                                                                                                                                                                                                                                                                                                                    |           |         |    |    |    |       |        |                                      |      |          |
|---------|------|--------------------------------------------------------------------------------------------------------------------------------------------------------------------------------------------------------------------------------------------------------------------------------------------------------------------|-----------|---------|----|----|----|-------|--------|--------------------------------------|------|----------|
| Control | 6011 | RecName gi 1221402<br>:<br>Full=Doli<br>chyl-<br>diphosph<br>ooligosac<br>charide--<br>protein<br>glycosyltr<br>ansferase<br>subunit<br>2;<br>AltName:<br>Full=Doli<br>chyl-<br>diphosph<br>ooligosac<br>charide--<br>protein<br>glycosyltr<br>ansferase<br>63 kDa<br>subunit;<br>AltName:<br>Full=Rib<br>ophorin- | 69,197.20 | 100.00% | 16 | 23 | 43 | 0.34% | 39.00% | FSSGGYY<br>DFSVK                     | 2.78 | 1,299.59 |
| Control | 6011 | RecName gi 1221402<br>:<br>Full=Doli<br>chyl-<br>diphosph<br>ooligosac<br>charide--<br>protein<br>glycosyltr<br>ansferase<br>subunit<br>2;<br>AltName:<br>Full=Doli<br>chyl-<br>diphosph<br>ooligosac<br>charide--<br>protein<br>glycosyltr<br>ansferase<br>63 kDa<br>subunit;<br>AltName:<br>Full=Rib<br>ophorin- | 69,197.20 | 100.00% | 16 | 23 | 43 | 0.34% | 39.00% | ISTEVGI<br>TNVDLS<br>TVDKDQ<br>SIAPK | 4.6  | 2,530.33 |

|         |      |                                                                                                                                                                                                                                                                                                                    |           |         |    |    |    |       |        |                                             |      |          |
|---------|------|--------------------------------------------------------------------------------------------------------------------------------------------------------------------------------------------------------------------------------------------------------------------------------------------------------------------|-----------|---------|----|----|----|-------|--------|---------------------------------------------|------|----------|
| Control | 6011 | RecName gi 1221402<br>:<br>Full=Doli<br>chyl-<br>diphosph<br>ooligosac<br>charide--<br>protein<br>glycosyltr<br>ansferase<br>subunit<br>2;<br>AltName:<br>Full=Doli<br>chyl-<br>diphosph<br>ooligosac<br>charide--<br>protein<br>glycosyltr<br>ansferase<br>63 kDa<br>subunit;<br>AltName:<br>Full=Rib<br>ophorin- | 69,197.20 | 100.00% | 16 | 23 | 43 | 0.34% | 39.00% | LDELGG<br>VYLQFE<br>EGLETT<br>ALFVAA<br>TYK | 4.46 | 2,977.51 |
| Control | 6011 | RecName gi 1221402<br>:<br>Full=Doli<br>chyl-<br>diphosph<br>ooligosac<br>charide--<br>protein<br>glycosyltr<br>ansferase<br>subunit<br>2;<br>AltName:<br>Full=Doli<br>chyl-<br>diphosph<br>ooligosac<br>charide--<br>protein<br>glycosyltr<br>ansferase<br>63 kDa<br>subunit;<br>AltName:<br>Full=Rib<br>ophorin- | 69,197.20 | 100.00% | 16 | 23 | 43 | 0.34% | 39.00% | LMDHVG<br>TEPSIK                            | 2.96 | 1,342.67 |



|         |      |                                                                                                                                                                                                                                                                                                                    |           |         |    |    |    |       |        |                                                 |          |
|---------|------|--------------------------------------------------------------------------------------------------------------------------------------------------------------------------------------------------------------------------------------------------------------------------------------------------------------------|-----------|---------|----|----|----|-------|--------|-------------------------------------------------|----------|
| Control | 6011 | RecName gi 1221402<br>:<br>Full=Doli<br>chyl-<br>diphosph<br>ooligosac<br>charide--<br>protein<br>glycosyltr<br>ansferase<br>subunit<br>2;<br>AltName:<br>Full=Doli<br>chyl-<br>diphosph<br>ooligosac<br>charide--<br>protein<br>glycosyltr<br>ansferase<br>63 kDa<br>subunit;<br>AltName:<br>Full=Rib<br>ophorin- | 69,197.20 | 100.00% | 16 | 23 | 43 | 0.34% | 39.00% | LMDHVG 5.27<br>TEPSIKE<br>DQVIQL<br>MNAIFS<br>K | 2,959.49 |
| Control | 6011 | RecName gi 1221402<br>:<br>Full=Doli<br>chyl-<br>diphosph<br>ooligosac<br>charide--<br>protein<br>glycosyltr<br>ansferase<br>subunit<br>2;<br>AltName:<br>Full=Doli<br>chyl-<br>diphosph<br>ooligosac<br>charide--<br>protein<br>glycosyltr<br>ansferase<br>63 kDa<br>subunit;<br>AltName:<br>Full=Rib<br>ophorin- | 69,197.20 | 100.00% | 16 | 23 | 43 | 0.34% | 39.00% | LQVTNV 5.48<br>LSQPLTQ<br>ATVK                  | 1,840.05 |

|         |      |                                                                                                                                                                                                                                                                                                                    |           |         |    |    |    |       |        |                                                  |          |
|---------|------|--------------------------------------------------------------------------------------------------------------------------------------------------------------------------------------------------------------------------------------------------------------------------------------------------------------------|-----------|---------|----|----|----|-------|--------|--------------------------------------------------|----------|
| Control | 6011 | RecName gi 1221402<br>:<br>Full=Doli<br>chyl-<br>diphosph<br>ooligosac<br>charide--<br>protein<br>glycosyltr<br>ansferase<br>subunit<br>2;<br>AltName:<br>Full=Doli<br>chyl-<br>diphosph<br>ooligosac<br>charide--<br>protein<br>glycosyltr<br>ansferase<br>63 kDa<br>subunit;<br>AltName:<br>Full=Rib<br>ophorin- | 69,197.20 | 100.00% | 16 | 23 | 43 | 0.34% | 39.00% | LQVTNV 2.83<br>LSQPLTQ<br>ATVKLE<br>HAK          | 2,418.37 |
| Control | 6011 | RecName gi 1221402<br>:<br>Full=Doli<br>chyl-<br>diphosph<br>ooligosac<br>charide--<br>protein<br>glycosyltr<br>ansferase<br>subunit<br>2;<br>AltName:<br>Full=Doli<br>chyl-<br>diphosph<br>ooligosac<br>charide--<br>protein<br>glycosyltr<br>ansferase<br>63 kDa<br>subunit;<br>AltName:<br>Full=Rib<br>ophorin- | 69,197.20 | 100.00% | 16 | 23 | 43 | 0.34% | 39.00% | LSKEET 6.11<br>VLATVQ<br>ALQTAS<br>YLSQQA<br>DLR | 2,963.57 |

|         |      |                                                                                                                                                                                                                                                                                                                    |           |         |    |    |    |       |        |                                    |      |          |
|---------|------|--------------------------------------------------------------------------------------------------------------------------------------------------------------------------------------------------------------------------------------------------------------------------------------------------------------------|-----------|---------|----|----|----|-------|--------|------------------------------------|------|----------|
| Control | 6011 | RecName gi 1221402<br>:<br>Full=Doli<br>chyl-<br>diphosph<br>ooligosac<br>charide--<br>protein<br>glycosyltr<br>ansferase<br>subunit<br>2;<br>AltName:<br>Full=Doli<br>chyl-<br>diphosph<br>ooligosac<br>charide--<br>protein<br>glycosyltr<br>ansferase<br>63 kDa<br>subunit;<br>AltName:<br>Full=Rib<br>ophorin- | 69,197.20 | 100.00% | 16 | 23 | 43 | 0.34% | 39.00% | NFESLSE<br>AFSVAS<br>AAAALS<br>ENR | 3.08 | 2,271.09 |
| Control | 6011 | RecName gi 1221402<br>:<br>Full=Doli<br>chyl-<br>diphosph<br>ooligosac<br>charide--<br>protein<br>glycosyltr<br>ansferase<br>subunit<br>2;<br>AltName:<br>Full=Doli<br>chyl-<br>diphosph<br>ooligosac<br>charide--<br>protein<br>glycosyltr<br>ansferase<br>63 kDa<br>subunit;<br>AltName:<br>Full=Rib<br>ophorin- | 69,197.20 | 100.00% | 16 | 23 | 43 | 0.34% | 39.00% | SIVEEIE<br>DLVAR                   | 3.53 | 1,372.73 |

|         |      |                                                                                                                                                                                                                                                                                                                    |           |         |    |    |    |       |        |                        |      |          |
|---------|------|--------------------------------------------------------------------------------------------------------------------------------------------------------------------------------------------------------------------------------------------------------------------------------------------------------------------|-----------|---------|----|----|----|-------|--------|------------------------|------|----------|
| Control | 6011 | RecName gi 1221402<br>:<br>Full=Doli<br>chyl-<br>diphosph<br>ooligosac<br>charide--<br>protein<br>glycosyltr<br>ansferase<br>subunit<br>2;<br>AltName:<br>Full=Doli<br>chyl-<br>diphosph<br>ooligosac<br>charide--<br>protein<br>glycosyltr<br>ansferase<br>63 kDa<br>subunit;<br>AltName:<br>Full=Rib<br>ophorin- | 69,197.20 | 100.00% | 16 | 23 | 43 | 0.34% | 39.00% | TGQEVV<br>FVAEPD<br>SK | 4.83 | 1,505.75 |
| Control | 6011 | RecName gi 1221402<br>:<br>Full=Doli<br>chyl-<br>diphosph<br>ooligosac<br>charide--<br>protein<br>glycosyltr<br>ansferase<br>subunit<br>2;<br>AltName:<br>Full=Doli<br>chyl-<br>diphosph<br>ooligosac<br>charide--<br>protein<br>glycosyltr<br>ansferase<br>63 kDa<br>subunit;<br>AltName:<br>Full=Rib<br>ophorin- | 69,197.20 | 100.00% | 16 | 23 | 43 | 0.34% | 39.00% | YIANTV<br>ELR          | 3.28 | 1,078.59 |

|         |      |                                                                                                                                                                            |            |           |         |   |   |   |       |        |                                         |          |
|---------|------|----------------------------------------------------------------------------------------------------------------------------------------------------------------------------|------------|-----------|---------|---|---|---|-------|--------|-----------------------------------------|----------|
| Control | 6011 | PREDICTED:<br>similar to Calcium-binding mitochondrial carrier protein Aralar2 (Mitochondrial aspartate glutamate carrier 2) (Solute carrier family 25 member 13) (Citrin) | gi 1198907 | 74,177.70 | 100.00% | 4 | 5 | 5 | 0.04% | 16.00% | FGLGSIA 4.61<br>GAVGAT<br>AVYPIDL<br>VK | 2,119.18 |
| Control | 6011 | PREDICTED:<br>similar to Calcium-binding mitochondrial carrier protein Aralar2 (Mitochondrial aspartate glutamate carrier 2) (Solute carrier family 25 member 13) (Citrin) | gi 1198907 | 74,177.70 | 100.00% | 4 | 5 | 5 | 0.04% | 16.00% | GLLPQLL 2.55<br>GVAPEK                  | 1,334.80 |
| Control | 6011 | PREDICTED:<br>similar to Calcium-binding mitochondrial carrier protein Aralar2 (Mitochondrial aspartate glutamate carrier 2) (Solute carrier family 25 member 13) (Citrin) | gi 1198907 | 74,177.70 | 100.00% | 4 | 5 | 5 | 0.04% | 16.00% | IAPLEEG 4.45<br>TLPFNLA<br>EAQR         | 1,969.04 |

|         |      |                                                                                                                                                                            |            |           |         |   |   |   |       |        |                            |          |
|---------|------|----------------------------------------------------------------------------------------------------------------------------------------------------------------------------|------------|-----------|---------|---|---|---|-------|--------|----------------------------|----------|
| Control | 6011 | PREDICTED:<br>similar to Calcium-binding mitochondrial carrier protein Aralar2 (Mitochondrial aspartate glutamate carrier 2) (Solute carrier family 25 member 13) (Citrin) | gi 1198907 | 74,177.70 | 100.00% | 4 | 5 | 5 | 0.04% | 16.00% | LQVAGEI 3<br>TTGPR         | 1,241.69 |
| Control | 6011 | PREDICTED:<br>similar to Calcium-binding mitochondrial carrier protein Aralar2 (Mitochondrial aspartate glutamate carrier 2) (Solute carrier family 25 member 13) (Citrin) | gi 1198907 | 74,177.70 | 100.00% | 4 | 5 | 5 | 0.04% | 16.00% | LTVNDF 2.17<br>VR          | 963.5258 |
| Control | 6011 | PREDICTED:<br>similar to Calcium-binding mitochondrial carrier protein Aralar2 (Mitochondrial aspartate glutamate carrier 2) (Solute carrier family 25 member 13) (Citrin) | gi 1198907 | 74,177.70 | 100.00% | 4 | 5 | 5 | 0.04% | 16.00% | TVELLS 3.21<br>GVVDQT<br>K | 1,388.76 |

|         |      |                                                                                                                                                                            |                           |           |         |   |   |   |       |        |                                             |      |          |
|---------|------|----------------------------------------------------------------------------------------------------------------------------------------------------------------------------|---------------------------|-----------|---------|---|---|---|-------|--------|---------------------------------------------|------|----------|
| Control | 6011 | PREDICTED:<br>similar to Calcium-binding mitochondrial carrier protein Aralar2 (Mitochondrial aspartate glutamate carrier 2) (Solute carrier family 25 member 13) (Citrin) | gi 119890734              | 74,177.70 | 100.00% | 4 | 5 | 5 | 0.04% | 16.00% | YEGFFG<br>LYR                               | 2.93 | 1,151.55 |
| Control | 6011 | PREDICTED:<br>similar to Calcium-binding mitochondrial carrier protein Aralar2 (Mitochondrial aspartate glutamate carrier 2) (Solute carrier family 25 member 13) (Citrin) | gi 119890734              | 74,177.70 | 100.00% | 4 | 5 | 5 | 0.04% | 16.00% | YLNIFGE<br>SQPNPK                           | 3.51 | 1,506.76 |
| Control | 6011 | BCL2-like 13 (apoptosis facilitator)                                                                                                                                       | gi 115305268,gi 118151242 | 30,356.10 | 99.80%  | 2 | 2 | 2 | 0.02% | 10.80% | APLLGA<br>LQTLLSR<br>PVTYQA<br>YR           | 3.13 | 2,331.32 |
| Control | 6011 | BCL2-like 13 (apoptosis facilitator)                                                                                                                                       | gi 115305268,gi 118151242 | 30,356.10 | 99.80%  | 2 | 2 | 2 | 0.02% | 10.80% | ILVPLILL<br>R                               | 2.38 | 1,049.74 |
| Control | 6011 | PREDICTED:<br>interleukin enhancer binding factor 3, 90kDa isoform 2                                                                                                       | gi 119894807              | 95,626.10 | 99.80%  | 2 | 2 | 2 | 0.02% | 5.02%  | GSSDHA<br>ESENVD<br>VPAEDE<br>GKEGAG<br>EQK | 3.72 | 2,771.19 |

|         |      |                                                                   |                                        |            |         |    |    |    |       |        |                                                                  |      |          |
|---------|------|-------------------------------------------------------------------|----------------------------------------|------------|---------|----|----|----|-------|--------|------------------------------------------------------------------|------|----------|
| Control | 6011 | PREDICTED: interleukin enhancer binding factor 3, 90kDa isoform 2 | gi 119894807                           | 95,626.10  | 99.80%  | 2  | 2  | 2  | 0.02% | 5.02%  | VLAGET<br>LSVNDP<br>PDVLDR                                       | 3.97 | 1,909.99 |
| Control | 6011 | Synaptotagmin 2 binding protein                                   | gi 74354054,gi 78369420                | 15,792.00  | 99.80%  | 2  | 4  | 5  | 0.04% | 19.30% | LQEGDK<br>ILSVNGQ<br>DLK                                         | 4.92 | 1,756.94 |
| Control | 6011 | Synaptotagmin 2 binding protein                                   | gi 74354054,gi 78369420                | 15,792.00  | 99.80%  | 2  | 4  | 5  | 0.04% | 19.30% | NLLHQD<br>AVDLFR                                                 | 3.62 | 1,440.76 |
| Control | 6011 | ADPGK protein                                                     | gi 126010731,gi 126722892,gi 205686178 | 54,066.80  | 99.80%  | 2  | 2  | 3  | 0.02% | 12.50% | FFSDKET<br>FHDIAQ<br>VASEFPE<br>AQHYVG<br>GNAALI<br>GQK          | 3.46 | 3,851.87 |
| Control | 6011 | ADPGK protein                                                     | gi 126010731,gi 126722892,gi 205686178 | 54,066.80  | 99.80%  | 2  | 2  | 3  | 0.02% | 12.50% | LLEVVT<br>SISDIPTG<br>VPVHLE<br>LASMTN<br>K                      | 3.27 | 2,879.54 |
| Control | 6011 | Tumor protein D52-like 2                                          | gi 74354962,gi 77736177                | 19,916.60  | 99.80%  | 2  | 2  | 2  | 0.02% | 29.00% | GLLSDS<br>MTDVPV<br>DTAVAA<br>QAPAVE<br>GLTETE<br>AEELRA<br>ELAK | 5.41 | 4,114.04 |
| Control | 6011 | Tumor protein D52-like 2                                          | gi 74354962,gi 77736177                | 19,916.60  | 99.80%  | 2  | 2  | 2  | 0.02% | 29.00% | TSAALST<br>MGSAISR                                               | 3.24 | 1,368.68 |
| Control | 6011 | UBA1 protein                                                      | gi 126717459,gi 156523068,gi 182702190 | 117,813.30 | 100.00% | 2  | 3  | 3  | 0.02% | 2.84%  | LAGTQP<br>LEVLEA<br>VQR                                          | 4.86 | 1,623.91 |
| Control | 6011 | UBA1 protein                                                      | gi 126717459,gi 156523068,gi 182702190 | 117,813.30 | 100.00% | 2  | 3  | 3  | 0.02% | 2.84%  | YDGQVA<br>VFGSDL<br>QER                                          | 3.17 | 1,683.80 |
| Control | 6011 | integrin alpha-V subunit 464                                      | gi 11596385,gi 124056464               | 116,117.20 | 100.00% | 17 | 21 | 43 | 0.34% | 25.40% | AGTQLL<br>AGLR                                                   | 2.91 | 999.5947 |
| Control | 6011 | integrin alpha-V subunit 464                                      | gi 11596385,gi 124056464               | 116,117.20 | 100.00% | 17 | 21 | 43 | 0.34% | 25.40% | FDLQIQS<br>SNLFDK                                                | 4.48 | 1,554.78 |
| Control | 6011 | integrin alpha-V subunit 464                                      | gi 11596385,gi 124056464               | 116,117.20 | 100.00% | 17 | 21 | 43 | 0.34% | 25.40% | FDLQIQS<br>SNLFDK<br>VSPVVS<br>YK                                | 3.51 | 2,414.26 |
| Control | 6011 | integrin alpha-V subunit 464                                      | gi 11596385,gi 124056464               | 116,117.20 | 100.00% | 17 | 21 | 43 | 0.34% | 25.40% | FGSAIAP<br>LGDLDQ<br>DGFNDI<br>AIAAPY<br>GGEDK                   | 2.85 | 3,037.44 |
| Control | 6011 | integrin alpha-V subunit 464                                      | gi 11596385,gi 124056464               | 116,117.20 | 100.00% | 17 | 21 | 43 | 0.34% | 25.40% | FGSAIAP<br>LGDLDQ<br>DGFNDI<br>AIAAPY<br>GGEDKK                  | 5.09 | 3,165.54 |



|         |      |                                                     |                                                                |            |         |    |    |    |       |        |                                                      |      |          |
|---------|------|-----------------------------------------------------|----------------------------------------------------------------|------------|---------|----|----|----|-------|--------|------------------------------------------------------|------|----------|
| Control | 6011 | integrin<br>alpha-V<br>subunit                      | gi 1159638<br>5,gi 124056<br>464                               | 116,117.20 | 100.00% | 17 | 21 | 43 | 0.34% | 25.40% | FSVHQQ<br>SEMDTS<br>VK                               | 4.52 | 1,638.74 |
| Control | 6011 | integrin<br>alpha-V<br>subunit                      | gi 1159638<br>5,gi 124056<br>464                               | 116,117.20 | 100.00% | 17 | 21 | 43 | 0.34% | 25.40% | GALPTK<br>LDFQVE<br>LLDKL<br>K                       | 4.14 | 2,141.26 |
| Control | 6011 | integrin<br>alpha-V<br>subunit                      | gi 1159638<br>5,gi 124056<br>464                               | 116,117.20 | 100.00% | 17 | 21 | 43 | 0.34% | 25.40% | GATDID<br>KNGYPD<br>LIVGAFG<br>VDR                   | 4.48 | 2,293.15 |
| Control | 6011 | integrin<br>alpha-V<br>subunit                      | gi 1159638<br>5,gi 124056<br>464                               | 116,117.20 | 100.00% | 17 | 21 | 43 | 0.34% | 25.40% | GIVYIFN<br>GRPTGL<br>NAVPSQI<br>LEGK                 | 3.35 | 2,543.40 |
| Control | 6011 | integrin<br>alpha-V<br>subunit                      | gi 1159638<br>5,gi 124056<br>464                               | 116,117.20 | 100.00% | 17 | 21 | 43 | 0.34% | 25.40% | IYIGDDN<br>PLTLIVK                                   | 4.12 | 1,573.88 |
| Control | 6011 | integrin<br>alpha-V<br>subunit                      | gi 1159638<br>5,gi 124056<br>464                               | 116,117.20 | 100.00% | 17 | 21 | 43 | 0.34% | 25.40% | MFLLVG<br>APK                                        | 3.58 | 991.5647 |
| Control | 6011 | integrin<br>alpha-V<br>subunit                      | gi 1159638<br>5,gi 124056<br>464                               | 116,117.20 | 100.00% | 17 | 21 | 43 | 0.34% | 25.40% | PTGLNA<br>VPSQILE<br>GK                              | 3.43 | 1,523.84 |
| Control | 6011 | integrin<br>alpha-V<br>subunit                      | gi 1159638<br>5,gi 124056<br>464                               | 116,117.20 | 100.00% | 17 | 21 | 43 | 0.34% | 25.40% | RALFLH<br>NR                                         | 2.61 | 1,026.60 |
| Control | 6011 | integrin<br>alpha-V<br>subunit                      | gi 1159638<br>5,gi 124056<br>464                               | 116,117.20 | 100.00% | 17 | 21 | 43 | 0.34% | 25.40% | SSASFNV<br>IEFPYK                                    | 3.3  | 1,488.74 |
| Control | 6011 | integrin<br>alpha-V<br>subunit                      | gi 1159638<br>5,gi 124056<br>464                               | 116,117.20 | 100.00% | 17 | 21 | 43 | 0.34% | 25.40% | TAQAIFD<br>DSYLG<br>SVAVG<br>FNGDGI<br>DDFVSG<br>VPR | 3.66 | 3,567.66 |
| Control | 6011 | integrin<br>alpha-V<br>subunit                      | gi 1159638<br>5,gi 124056<br>464                               | 116,117.20 | 100.00% | 17 | 21 | 43 | 0.34% | 25.40% | VRPPQE<br>EQEREQ<br>LQPHEN<br>GEGNSE<br>T            | 2.32 | 2,917.33 |
| Control | 6011 | integrin<br>alpha-V<br>subunit                      | gi 1159638<br>5,gi 124056<br>464                               | 116,117.20 | 100.00% | 17 | 21 | 43 | 0.34% | 25.40% | YKENPE<br>TEEDVG<br>PVVQHI<br>YELR                   | 4.62 | 2,644.29 |
| Control | 6011 | selenopro<br>tein S                                 | gi 1449538<br>69,gi 17204<br>5703,gi 864<br>38358              | 21,367.70  | 99.80%  | 2  | 2  | 2  | 0.02% | 17.90% | HLDQAA<br>AALEPDI<br>VVK                             | 2.63 | 1,689.92 |
| Control | 6011 | selenopro<br>tein S                                 | gi 1449538<br>69,gi 17204<br>5703,gi 864<br>38358              | 21,367.70  | 99.80%  | 2  | 2  | 2  | 0.02% | 17.90% | KPQEED<br>SPGPSTS<br>SVIPK                           | 3.78 | 1,882.94 |
| Control | 6011 | RecName<br>:<br>Full=Tra<br>nsaldolas<br>e          | gi 1108164<br>39,gi 16442<br>0731,gi 836<br>38723              | 37,668.70  | 99.80%  | 2  | 2  | 2  | 0.02% | 11.30% | KLGGSQ<br>EEQITNA<br>IDKLFVL<br>FGAEILK              | 3.03 | 2,961.63 |
| Control | 6011 | RecName<br>:<br>Full=Tra<br>nsaldolas<br>e          | gi 1108164<br>39,gi 16442<br>0731,gi 836<br>38723              | 37,668.70  | 99.80%  | 2  | 2  | 2  | 0.02% | 11.30% | LSFDKD<br>AMVAR                                      | 2.6  | 1,268.63 |
| Control | 6011 | poly(A)<br>binding<br>protein,<br>cytoplas<br>mic 1 | gi 4138679<br>8,gi 471170<br>93,gi 74268<br>035,gi 8979<br>741 | 70,653.30  | 100.00% | 3  | 3  | 3  | 0.02% | 6.60%  | ALDTMN<br>FDVIK                                      | 2.23 | 1,282.64 |

|         |      |                                                                                                                                                           |                                                                                                                   |           |         |   |   |   |       |        |                                 |      |          |
|---------|------|-----------------------------------------------------------------------------------------------------------------------------------------------------------|-------------------------------------------------------------------------------------------------------------------|-----------|---------|---|---|---|-------|--------|---------------------------------|------|----------|
| Control | 6011 | poly(A)<br>binding<br>protein,<br>cytoplas<br>mic 1                                                                                                       | gi 4138679<br>8,gi 471170<br>93,gi 74268<br>035,gi 8979<br>741                                                    | 70,653.30 | 100.00% | 3 | 3 | 3 | 0.02% | 6.60%  | IVATKPL<br>YVALAQ<br>R          | 3.31 | 1,542.94 |
| Control | 6011 | poly(A)<br>binding<br>protein,<br>cytoplas<br>mic 1                                                                                                       | gi 4138679<br>8,gi 471170<br>93,gi 74268<br>035,gi 8979<br>741                                                    | 70,653.30 | 100.00% | 3 | 3 | 3 | 0.02% | 6.60%  | SLGYAY<br>VNFQQP<br>ADAER       | 3.31 | 1,928.91 |
| Control | 6011 | RecName<br>:<br>Full=Mo<br>nocarbox<br>ylate<br>transport<br>er 1;<br>Short=M<br>CT 1;<br>AltName:<br>Full=Solu<br>te carrier<br>family 16<br>member<br>1 | gi 1221399<br>73,gi 77567<br>740,gi 8261<br>7542                                                                  | 54,281.70 | 100.00% | 3 | 3 | 3 | 0.02% | 3.79%  | GASDAN<br>TDLIGG<br>NPK         | 3.72 | 1,429.69 |
| Control | 6011 | RecName<br>:<br>Full=Mo<br>nocarbox<br>ylate<br>transport<br>er 1;<br>Short=M<br>CT 1;<br>AltName:<br>Full=Solu<br>te carrier<br>family 16<br>member<br>1 | gi 1221399<br>73,gi 77567<br>740,gi 8261<br>7542                                                                  | 54,281.70 | 100.00% | 3 | 3 | 3 | 0.02% | 3.79%  | GASDAN<br>TDLIGG<br>NPKEEK      | 4.23 | 1,815.87 |
| Control | 6011 | RecName<br>:<br>Full=Mo<br>nocarbox<br>ylate<br>transport<br>er 1;<br>Short=M<br>CT 1;<br>AltName:<br>Full=Solu<br>te carrier<br>family 16<br>member<br>1 | gi 1221399<br>73,gi 77567<br>740,gi 8261<br>7542                                                                  | 54,281.70 | 100.00% | 3 | 3 | 3 | 0.02% | 3.79%  | GASDAN<br>TDLIGG<br>NPKEEK<br>K | 3.01 | 1,943.97 |
| Control | 6011 | RecName<br>: Full=L-<br>lactate<br>dehydrog<br>enase B<br>chain;<br>Short=L<br>DH-B                                                                       | gi 1185726<br>66,gi 14874<br>4825,gi 154<br>425698,gi 2<br>7806561,gi <br>59858383,g<br>i 74353944,<br>gi 8979739 | 36,679.70 | 100.00% | 3 | 4 | 4 | 0.03% | 10.80% | IVADKD<br>YSVTAN<br>SK          | 3.03 | 1,510.77 |

|         |      |                                                                                                        |                                                                                                                   |           |         |   |   |   |       |        |                           |      |          |
|---------|------|--------------------------------------------------------------------------------------------------------|-------------------------------------------------------------------------------------------------------------------|-----------|---------|---|---|---|-------|--------|---------------------------|------|----------|
| Control | 6011 | RecName<br>: Full=L-<br>lactate<br>dehydrog<br>enase B<br>chain;<br>Short=L<br>DH-B                    | gi 1185726<br>66,gi 14874<br>4825,gi 154<br>425698,gi 2<br>7806561,gi <br>59858383,g<br>i 74353944,<br>gi 8979739 | 36,679.70 | 100.00% | 3 | 4 | 4 | 0.03% | 10.80% | LKDEEV<br>AQLKK           | 3.37 | 1,300.75 |
| Control | 6011 | RecName<br>: Full=L-<br>lactate<br>dehydrog<br>enase B<br>chain;<br>Short=L<br>DH-B                    | gi 1185726<br>66,gi 14874<br>4825,gi 154<br>425698,gi 2<br>7806561,gi <br>59858383,g<br>i 74353944,<br>gi 8979739 | 36,679.70 | 100.00% | 3 | 4 | 4 | 0.03% | 10.80% | MVVESA<br>YEVIK           | 2.75 | 1,283.66 |
| Control | 6011 | PREDIC<br>TED:<br>similar to<br>armadillo<br>repeat<br>containin<br>g, X-<br>linked 3                  | gi 1199225<br>67                                                                                                  | 42,522.80 | 99.80%  | 2 | 2 | 2 | 0.02% | 7.92%  | ASPNSD<br>DTILSPQ<br>ELQK | 2.98 | 1,842.91 |
| Control | 6011 | PREDIC<br>TED:<br>similar to<br>armadillo<br>repeat<br>containin<br>g, X-<br>linked 3                  | gi 1199225<br>67                                                                                                  | 42,522.80 | 99.80%  | 2 | 2 | 2 | 0.02% | 7.92%  | LLLNLA<br>ENPAMT<br>R     | 4.23 | 1,471.79 |
| Control | 6011 | PREDIC<br>TED:<br>similar to<br>program<br>med cell<br>death 6<br>interactin<br>g protein<br>isoform 1 | gi 1199142<br>74                                                                                                  | 96,862.00 | 100.00% | 5 | 5 | 5 | 0.04% | 7.20%  | LLDEEE<br>ATDNDL<br>R     | 4.66 | 1,532.71 |
| Control | 6011 | PREDIC<br>TED:<br>similar to<br>program<br>med cell<br>death 6<br>interactin<br>g protein<br>isoform 1 | gi 1199142<br>74                                                                                                  | 96,862.00 | 100.00% | 5 | 5 | 5 | 0.04% | 7.20%  | MVPVSV<br>QQLAA<br>YNQR   | 4.14 | 1,806.92 |
| Control | 6011 | PREDIC<br>TED:<br>similar to<br>program<br>med cell<br>death 6<br>interactin<br>g protein<br>isoform 1 | gi 1199142<br>74                                                                                                  | 96,862.00 | 100.00% | 5 | 5 | 5 | 0.04% | 7.20%  | NIQVSH<br>QEFSK           | 3.44 | 1,316.66 |
| Control | 6011 | PREDIC<br>TED:<br>similar to<br>program<br>med cell<br>death 6<br>interactin<br>g protein<br>isoform 1 | gi 1199142<br>74                                                                                                  | 96,862.00 | 100.00% | 5 | 5 | 5 | 0.04% | 7.20%  | STPVNV<br>PISQK           | 2.52 | 1,169.65 |

|         |      |                                                                                                   |                                                                            |           |         |   |   |    |       |        |                                                                |          |
|---------|------|---------------------------------------------------------------------------------------------------|----------------------------------------------------------------------------|-----------|---------|---|---|----|-------|--------|----------------------------------------------------------------|----------|
| Control | 6011 | PREDICTED:<br>similar to<br>program<br>med cell<br>death 6<br>interacting<br>protein<br>isoform 1 | gi 119914274                                                               | 96,862.00 | 100.00% | 5 | 5 | 5  | 0.04% | 7.20%  | TMQGSE 3.4<br>VVNVLK                                           | 1,320.68 |
| Control | 6011 | ACTR2<br>protein                                                                                  | gi 154425680,gi 156121073,gi 17943200,gi 182627520,gi 56966173,gi 56966193 | 44,743.70 | 99.80%  | 2 | 2 | 2  | 0.02% | 12.20% | DLMVGD 3.03<br>EASELR                                          | 1,350.62 |
| Control | 6011 | ACTR2<br>protein                                                                                  | gi 154425680,gi 156121073,gi 17943200,gi 182627520,gi 56966173,gi 56966193 | 44,743.70 | 99.80%  | 2 | 2 | 2  | 0.02% | 12.20% | FEAPEAL 4.55<br>FQPHLIN<br>VEGVGV<br>AELLFN<br>TIQAADI<br>DTR  | 3,938.03 |
| Control | 6011 | Sec61<br>alpha 1<br>subunit<br>(S. cerevisiae)                                                    | gi 154426140,gi 59857767,gi 75060961,gi 94966817                           | 52,208.90 | 100.00% | 6 | 7 | 21 | 0.16% | 21.60% | FLEVIKP 4.51<br>FCVILPEI<br>QKPER                              | 2,398.36 |
| Control | 6011 | Sec61<br>alpha 1<br>subunit<br>(S. cerevisiae)                                                    | gi 154426140,gi 59857767,gi 75060961,gi 94966817                           | 52,208.90 | 100.00% | 6 | 7 | 21 | 0.16% | 21.60% | GMEFEG 3.96<br>AIALFH<br>LLATR                                 | 2,005.06 |
| Control | 6011 | Sec61<br>alpha 1<br>subunit<br>(S. cerevisiae)                                                    | gi 154426140,gi 59857767,gi 75060961,gi 94966817                           | 52,208.90 | 100.00% | 6 | 7 | 21 | 0.16% | 21.60% | GQYNTY 4.26<br>PIKLFYT<br>SNIPILQ<br>SALVSN<br>LYVISQ<br>MLSAR | 4,335.31 |
| Control | 6011 | Sec61<br>alpha 1<br>subunit<br>(S. cerevisiae)                                                    | gi 154426140,gi 59857767,gi 75060961,gi 94966817                           | 52,208.90 | 100.00% | 6 | 7 | 21 | 0.16% | 21.60% | GTMEL 4.65<br>GISPIVTS<br>GLIMQL<br>LAGAK                      | 2,529.40 |
| Control | 6011 | Sec61<br>alpha 1<br>subunit<br>(S. cerevisiae)                                                    | gi 154426140,gi 59857767,gi 75060961,gi 94966817                           | 52,208.90 | 100.00% | 6 | 7 | 21 | 0.16% | 21.60% | LFYTSNI 5.86<br>PIILQSAL<br>VSNLYVI<br>SQMLSA<br>R             | 3,270.78 |
| Control | 6011 | Sec61<br>alpha 1<br>subunit<br>(S. cerevisiae)                                                    | gi 154426140,gi 59857767,gi 75060961,gi 94966817                           | 52,208.90 | 100.00% | 6 | 7 | 21 | 0.16% | 21.60% | YRQYN 4.04<br>TYPIK                                            | 1,402.71 |

|         |      |                                           |                                                                                                                                                |           |         |    |    |    |       |        |                                              |          |
|---------|------|-------------------------------------------|------------------------------------------------------------------------------------------------------------------------------------------------|-----------|---------|----|----|----|-------|--------|----------------------------------------------|----------|
| Control | 6011 | H(+)-<br>transporti<br>ng ATP<br>synthase | gi 102,gi 11<br>4402,gi 158<br>429020,gi 1<br>58429021,g<br>i 15842902<br>2,gi 158431<br>066,gi 1584<br>31067,gi 15<br>8431068,gi <br>27807237 | 55,248.00 | 100.00% | 21 | 27 | 58 | 0.45% | 54.50% | AVDSL<br>V 3.09<br>PIGR                      | 1,026.59 |
| Control | 6011 | H(+)-<br>transporti<br>ng ATP<br>synthase | gi 102,gi 11<br>4402,gi 158<br>429020,gi 1<br>58429021,g<br>i 15842902<br>2,gi 158431<br>066,gi 1584<br>31067,gi 15<br>8431068,gi <br>27807237 | 55,248.00 | 100.00% | 21 | 27 | 58 | 0.45% | 54.50% | EAYPGD<br>V 2.44<br>VFYLHS<br>R              | 1,553.74 |
| Control | 6011 | H(+)-<br>transporti<br>ng ATP<br>synthase | gi 102,gi 11<br>4402,gi 158<br>429020,gi 1<br>58429021,g<br>i 15842902<br>2,gi 158431<br>066,gi 1584<br>31067,gi 15<br>8431068,gi <br>27807237 | 55,248.00 | 100.00% | 21 | 27 | 58 | 0.45% | 54.50% | EVAafa<br>V 4.45<br>QFGSDL<br>DAATQQ<br>LLSR | 2,338.17 |
| Control | 6011 | H(+)-<br>transporti<br>ng ATP<br>synthase | gi 102,gi 11<br>4402,gi 158<br>429020,gi 1<br>58429021,g<br>i 15842902<br>2,gi 158431<br>066,gi 1584<br>31067,gi 15<br>8431068,gi <br>27807237 | 55,248.00 | 100.00% | 21 | 27 | 58 | 0.45% | 54.50% | FENafLS<br>V 4.15<br>HVISQH<br>QALLSK        | 2,169.15 |
| Control | 6011 | H(+)-<br>transporti<br>ng ATP<br>synthase | gi 102,gi 11<br>4402,gi 158<br>429020,gi 1<br>58429021,g<br>i 15842902<br>2,gi 158431<br>066,gi 1584<br>31067,gi 15<br>8431068,gi <br>27807237 | 55,248.00 | 100.00% | 21 | 27 | 58 | 0.45% | 54.50% | GIRPAIN<br>V 3.02<br>VGLSVS<br>R             | 1,438.85 |
| Control | 6011 | H(+)-<br>transporti<br>ng ATP<br>synthase | gi 102,gi 11<br>4402,gi 158<br>429020,gi 1<br>58429021,g<br>i 15842902<br>2,gi 158431<br>066,gi 1584<br>31067,gi 15<br>8431068,gi <br>27807237 | 55,248.00 | 100.00% | 21 | 27 | 58 | 0.45% | 54.50% | GMSLNL<br>V 4.98<br>EPDNVG<br>VVVFGN<br>DK   | 2,120.03 |

|         |      |                                           |                                                                                                                                                |           |         |    |    |    |       |        |                                         |          |
|---------|------|-------------------------------------------|------------------------------------------------------------------------------------------------------------------------------------------------|-----------|---------|----|----|----|-------|--------|-----------------------------------------|----------|
| Control | 6011 | H(+)-<br>transporti<br>ng ATP<br>synthase | gi 102,gi 11<br>4402,gi 158<br>429020,gi 1<br>58429021,g<br>i 15842902<br>2,gi 158431<br>066,gi 1584<br>31067,gi 15<br>8431068,gi <br>27807237 | 55,248.00 | 100.00% | 21 | 27 | 58 | 0.45% | 54.50% | GYLDKL 2.76<br>EPSK                     | 1,149.62 |
| Control | 6011 | H(+)-<br>transporti<br>ng ATP<br>synthase | gi 102,gi 11<br>4402,gi 158<br>429020,gi 1<br>58429021,g<br>i 15842902<br>2,gi 158431<br>066,gi 1584<br>31067,gi 15<br>8431068,gi <br>27807237 | 55,248.00 | 100.00% | 21 | 27 | 58 | 0.45% | 54.50% | HALIYD 3.4<br>DLSK                      | 1,287.69 |
| Control | 6011 | H(+)-<br>transporti<br>ng ATP<br>synthase | gi 102,gi 11<br>4402,gi 158<br>429020,gi 1<br>58429021,g<br>i 15842902<br>2,gi 158431<br>066,gi 1584<br>31067,gi 15<br>8431068,gi <br>27807237 | 55,248.00 | 100.00% | 21 | 27 | 58 | 0.45% | 54.50% | ILGADTS 4.82<br>VDLEET<br>GR            | 1,575.79 |
| Control | 6011 | H(+)-<br>transporti<br>ng ATP<br>synthase | gi 102,gi 11<br>4402,gi 158<br>429020,gi 1<br>58429021,g<br>i 15842902<br>2,gi 158431<br>066,gi 1584<br>31067,gi 15<br>8431068,gi <br>27807237 | 55,248.00 | 100.00% | 21 | 27 | 58 | 0.45% | 54.50% | ISVREPM 2.67<br>QTGIK                   | 1,374.74 |
| Control | 6011 | H(+)-<br>transporti<br>ng ATP<br>synthase | gi 102,gi 11<br>4402,gi 158<br>429020,gi 1<br>58429021,g<br>i 15842902<br>2,gi 158431<br>066,gi 1584<br>31067,gi 15<br>8431068,gi <br>27807237 | 55,248.00 | 100.00% | 21 | 27 | 58 | 0.45% | 54.50% | ITKFENA 2.89<br>FLSHVIS<br>QHQALL<br>SK | 2,511.37 |
| Control | 6011 | H(+)-<br>transporti<br>ng ATP<br>synthase | gi 102,gi 11<br>4402,gi 158<br>429020,gi 1<br>58429021,g<br>i 15842902<br>2,gi 158431<br>066,gi 1584<br>31067,gi 15<br>8431068,gi <br>27807237 | 55,248.00 | 100.00% | 21 | 27 | 58 | 0.45% | 54.50% | LKEIVTN 4.36<br>FLAGFE<br>A             | 1,551.84 |

|         |      |                                           |                                                                                                                                                |           |         |    |    |    |       |        |                                   |      |          |
|---------|------|-------------------------------------------|------------------------------------------------------------------------------------------------------------------------------------------------|-----------|---------|----|----|----|-------|--------|-----------------------------------|------|----------|
| Control | 6011 | H(+)-<br>transporti<br>ng ATP<br>synthase | gi 102,gi 11<br>4402,gi 158<br>429020,gi 1<br>58429021,g<br>i 15842902<br>2,gi 158431<br>066,gi 1584<br>31067,gi 15<br>8431068,gi <br>27807237 | 55,248.00 | 100.00% | 21 | 27 | 58 | 0.45% | 54.50% | QGQYSP<br>MAIEEQ<br>VAVIYA<br>GVR | 3.51 | 2,325.15 |
| Control | 6011 | H(+)-<br>transporti<br>ng ATP<br>synthase | gi 102,gi 11<br>4402,gi 158<br>429020,gi 1<br>58429021,g<br>i 15842902<br>2,gi 158431<br>066,gi 1584<br>31067,gi 15<br>8431068,gi <br>27807237 | 55,248.00 | 100.00% | 21 | 27 | 58 | 0.45% | 54.50% | QVAGTM<br>KLELAQ<br>YR            | 2.6  | 1,607.86 |
| Control | 6011 | H(+)-<br>transporti<br>ng ATP<br>synthase | gi 102,gi 11<br>4402,gi 158<br>429020,gi 1<br>58429021,g<br>i 15842902<br>2,gi 158431<br>066,gi 1584<br>31067,gi 15<br>8431068,gi <br>27807237 | 55,248.00 | 100.00% | 21 | 27 | 58 | 0.45% | 54.50% | TGAIVD<br>VPVGEE<br>LLGR          | 4.48 | 1,624.89 |
| Control | 6011 | H(+)-<br>transporti<br>ng ATP<br>synthase | gi 102,gi 11<br>4402,gi 158<br>429020,gi 1<br>58429021,g<br>i 15842902<br>2,gi 158431<br>066,gi 1584<br>31067,gi 15<br>8431068,gi <br>27807237 | 55,248.00 | 100.00% | 21 | 27 | 58 | 0.45% | 54.50% | TGTAEV<br>SSILEER                 | 3.98 | 1,391.70 |
| Control | 6011 | H(+)-<br>transporti<br>ng ATP<br>synthase | gi 102,gi 11<br>4402,gi 158<br>429020,gi 1<br>58429021,g<br>i 15842902<br>2,gi 158431<br>066,gi 1584<br>31067,gi 15<br>8431068,gi <br>27807237 | 55,248.00 | 100.00% | 21 | 27 | 58 | 0.45% | 54.50% | TSIAIDTI<br>INQK                  | 3.21 | 1,316.74 |
| Control | 6011 | H(+)-<br>transporti<br>ng ATP<br>synthase | gi 102,gi 11<br>4402,gi 158<br>429020,gi 1<br>58429021,g<br>i 15842902<br>2,gi 158431<br>066,gi 1584<br>31067,gi 15<br>8431068,gi <br>27807237 | 55,248.00 | 100.00% | 21 | 27 | 58 | 0.45% | 54.50% | VGLKAP<br>GIIPR                   | 3.67 | 1,120.72 |

|         |      |                                                                   |                                                                                                                                                |           |         |    |    |    |       |        |                                         |          |
|---------|------|-------------------------------------------------------------------|------------------------------------------------------------------------------------------------------------------------------------------------|-----------|---------|----|----|----|-------|--------|-----------------------------------------|----------|
| Control | 6011 | H(+)-<br>transporti<br>ng ATP<br>synthase                         | gi 102,gi 11<br>4402,gi 158<br>429020,gi 1<br>58429021,g<br>i 15842902<br>2,gi 158431<br>066,gi 1584<br>31067,gi 15<br>8431068,gi <br>27807237 | 55,248.00 | 100.00% | 21 | 27 | 58 | 0.45% | 54.50% | VLSIGDG 2.67<br>IAR                     | 1,000.58 |
| Control | 6011 | H(+)-<br>transporti<br>ng ATP<br>synthase                         | gi 102,gi 11<br>4402,gi 158<br>429020,gi 1<br>58429021,g<br>i 15842902<br>2,gi 158431<br>066,gi 1584<br>31067,gi 15<br>8431068,gi <br>27807237 | 55,248.00 | 100.00% | 21 | 27 | 58 | 0.45% | 54.50% | VVDALG 3.69<br>NAIDGK                   | 1,171.63 |
| Control | 6011 | H(+)-<br>transporti<br>ng ATP<br>synthase                         | gi 102,gi 11<br>4402,gi 158<br>429020,gi 1<br>58429021,g<br>i 15842902<br>2,gi 158431<br>066,gi 1584<br>31067,gi 15<br>8431068,gi <br>27807237 | 55,248.00 | 100.00% | 21 | 27 | 58 | 0.45% | 54.50% | VVDALG 4.91<br>NAIDGK<br>GPIGSK         | 1,710.94 |
| Control | 6011 | PREDIC<br>TED:<br>similar to<br>60S<br>ribosomal<br>protein<br>L9 | gi 1199043<br>84,gi 11990<br>5715,gi 164<br>420694,gi 7<br>6607197,gi <br>91207745                                                             | 21,858.70 | 99.80%  | 2  | 2  | 2  | 0.02% | 15.10% | FLDGIYV 3.14<br>SEK                     | 1,170.60 |
| Control | 6011 | PREDIC<br>TED:<br>similar to<br>60S<br>ribosomal<br>protein<br>L9 | gi 1199043<br>84,gi 11990<br>5715,gi 164<br>420694,gi 7<br>6607197,gi <br>91207745                                                             | 21,858.70 | 99.80%  | 2  | 2  | 2  | 0.02% | 15.10% | TILSNQT 4.28<br>VDIPENV<br>DINLK        | 2,126.13 |
| Control | 6011 | SEC22<br>vesicle<br>traffickin<br>g protein<br>homolog<br>B       | gi 1154964<br>88,gi 74354<br>583                                                                                                               | 28,710.00 | 100.00% | 7  | 9  | 16 | 0.13% | 41.40% | IMVANIE 4.72<br>EVLQR                   | 1,430.77 |
| Control | 6011 | SEC22<br>vesicle<br>traffickin<br>g protein<br>homolog<br>B       | gi 1154964<br>88,gi 74354<br>583                                                                                                               | 28,710.00 | 100.00% | 7  | 9  | 16 | 0.13% | 41.40% | IMVANIE 2.93<br>EVLQRG<br>EALSAL<br>DSK | 2,402.26 |
| Control | 6011 | SEC22<br>vesicle<br>traffickin<br>g protein<br>homolog<br>B       | gi 1154964<br>88,gi 74354<br>583                                                                                                               | 28,710.00 | 100.00% | 7  | 9  | 16 | 0.13% | 41.40% | KLAFAY 4.74<br>LEDLHS<br>EFDEQH<br>GK   | 2,377.15 |



|         |      |                                              |                                                   |           |         |   |   |    |       |        |                                        |      |          |
|---------|------|----------------------------------------------|---------------------------------------------------|-----------|---------|---|---|----|-------|--------|----------------------------------------|------|----------|
| Control | 6011 | SEC22 vesicle traffickin g protein homolog B | gi 115496488,gi 74354583                          | 28,710.00 | 100.00% | 7 | 9 | 16 | 0.13% | 41.40% | NLGSIINTELVQDR                         | 5.03 | 1,586.81 |
| Control | 6011 | SEC22 vesicle traffickin g protein homolog B | gi 115496488,gi 74354583                          | 28,710.00 | 100.00% | 7 | 9 | 16 | 0.13% | 41.40% | VADGLPLAASMQEDEQSGR                    | 3.8  | 1,989.92 |
| Control | 6011 | SEC22 vesicle traffickin g protein homolog B | gi 115496488,gi 74354583                          | 28,710.00 | 100.00% | 7 | 9 | 16 | 0.13% | 41.40% | VADGLPLAASMQEDEQSGRDLQQYQSQAK          | 2.8  | 3,179.49 |
| Control | 6011 | SEC22 vesicle traffickin g protein homolog B | gi 115496488,gi 74354583                          | 28,710.00 | 100.00% | 7 | 9 | 16 | 0.13% | 41.40% | VPTVSRPYSFIEFDYIYQK                    | 3.59 | 2,290.18 |
| Control | 6011 | GTP-binding protein (smg p21B)               | gi 163722,gi 28461271,gi 4711772,gi 2,gi 74354581 | 20,806.90 | 100.00% | 5 | 7 | 11 | 0.09% | 27.20% | INVNEIFYDLVR                           | 3.14 | 1,494.80 |
| Control | 6011 | GTP-binding protein (smg p21B)               | gi 163722,gi 28461271,gi 4711772,gi 2,gi 74354581 | 20,806.90 | 100.00% | 5 | 7 | 11 | 0.09% | 27.20% | LVVLGSGGVGK                            | 3.05 | 985.6042 |
| Control | 6011 | GTP-binding protein (smg p21B)               | gi 163722,gi 28461271,gi 4711772,gi 2,gi 74354581 | 20,806.90 | 100.00% | 5 | 7 | 11 | 0.09% | 27.20% | SKINVNEIFYDLVR                         | 4.07 | 1,709.92 |
| Control | 6011 | GTP-binding protein (smg p21B)               | gi 163722,gi 28461271,gi 4711772,gi 2,gi 74354581 | 20,806.90 | 100.00% | 5 | 7 | 11 | 0.09% | 27.20% | VKDTDDVPMILVGNK                        | 3.92 | 1,659.86 |
| Control | 6011 | GTP-binding protein (smg p21B)               | gi 163722,gi 28461271,gi 4711772,gi 2,gi 74354581 | 20,806.90 | 100.00% | 5 | 7 | 11 | 0.09% | 27.20% | YDPTIEDSYR                             | 2.82 | 1,258.56 |
| Control | 6011 | metadherin                                   | gi 114051299,gi 89994114                          | 64,037.90 | 100.00% | 5 | 6 | 8  | 0.06% | 15.10% | DKVQSDSGSLDSTIPGIENITVTTTEQVTTASFPVGSK | 2.87 | 3,909.95 |
| Control | 6011 | metadherin                                   | gi 114051299,gi 89994114                          | 64,037.90 | 100.00% | 5 | 6 | 8  | 0.06% | 15.10% | EEAAAAAPAPAADDDQGVLK                   | 3.33 | 1,794.89 |
| Control | 6011 | metadherin                                   | gi 114051299,gi 89994114                          | 64,037.90 | 100.00% | 5 | 6 | 8  | 0.06% | 15.10% | KREEAAAAPAAPAADDDQGVLK                 | 4.47 | 2,079.08 |
| Control | 6011 | metadherin                                   | gi 114051299,gi 89994114                          | 64,037.90 | 100.00% | 5 | 6 | 8  | 0.06% | 15.10% | TISTSDPADALIK                          | 3.22 | 1,331.71 |
| Control | 6011 | metadherin                                   | gi 114051299,gi 89994114                          | 64,037.90 | 100.00% | 5 | 6 | 8  | 0.06% | 15.10% | TLPPAISTEPSVILSK                       | 3.11 | 1,652.95 |

|         |      |                                                                                                                                                                             |                                                                                 |           |         |   |   |   |       |       |                                                |      |          |
|---------|------|-----------------------------------------------------------------------------------------------------------------------------------------------------------------------------|---------------------------------------------------------------------------------|-----------|---------|---|---|---|-------|-------|------------------------------------------------|------|----------|
| Control | 6011 | RecName<br>:<br>Full=Aco<br>nitrate<br>hydratase<br>,<br>mitochon<br>drial;<br>Short=Ac<br>onitase;<br>AltName:<br>Full=Citr<br>ate hydro-<br>lyase;<br>Flags:<br>Precursor | gi 1102829<br>35,gi 13642<br>16,gi 27806<br>769,gi 7426<br>8076,gi 909<br>70312 | 85,342.00 | 100.00% | 3 | 3 | 3 | 0.02% | 7.56% | AEFDPG<br>QDTYQH<br>PPKDSS<br>GQQVDV<br>SPTSQR | 4.01 | 3,301.50 |
| Control | 6011 | RecName<br>:<br>Full=Aco<br>nitrate<br>hydratase<br>,<br>mitochon<br>drial;<br>Short=Ac<br>onitase;<br>AltName:<br>Full=Citr<br>ate hydro-<br>lyase;<br>Flags:<br>Precursor | gi 1102829<br>35,gi 13642<br>16,gi 27806<br>769,gi 7426<br>8076,gi 909<br>70312 | 85,342.00 | 100.00% | 3 | 3 | 3 | 0.02% | 7.56% | FKLEAP<br>DADELP<br>R                          | 4.65 | 1,500.77 |
| Control | 6011 | RecName<br>:<br>Full=Aco<br>nitrate<br>hydratase<br>,<br>mitochon<br>drial;<br>Short=Ac<br>onitase;<br>AltName:<br>Full=Citr<br>ate hydro-<br>lyase;<br>Flags:<br>Precursor | gi 1102829<br>35,gi 13642<br>16,gi 27806<br>769,gi 7426<br>8076,gi 909<br>70312 | 85,342.00 | 100.00% | 3 | 3 | 3 | 0.02% | 7.56% | IVYGH<br>DDPANQ<br>EIER                        | 4.2  | 1,868.91 |
| Control | 6011 | PREDIC<br>TED:<br>similar to<br>Import<br>inner<br>membran<br>e<br>translocas<br>e subunit<br>TIM44,<br>mitochon<br>drial                                                   | gi 1198948<br>45                                                                | 51,429.40 | 100.00% | 2 | 2 | 2 | 0.02% | 6.17% | TEMSEV<br>LTELRL                               | 3.1  | 1,436.73 |

|         |      |                                                                                            |                        |           |         |   |   |   |       |        |                              |      |          |
|---------|------|--------------------------------------------------------------------------------------------|------------------------|-----------|---------|---|---|---|-------|--------|------------------------------|------|----------|
| Control | 6011 | PREDICTED:<br>similar to<br>Import inner membrane translocase subunit TIM44, mitochondrial | gi 1198948             | 51,429.40 | 100.00% | 2 | 2 | 2 | 0.02% | 6.17%  | VLTDKV<br>TDLLGG<br>LFSK     | 3.21 | 1,705.97 |
| Control | 6011 | RecName: Full=ATP synthase subunit g, mitochondrial; Short=A TPase subunit g               | gi 2493093, gi 7435401 | 11,604.00 | 100.00% | 3 | 4 | 7 | 0.05% | 33.70% | APALVN<br>AAVTYS<br>KPR      | 3.81 | 1,557.87 |
| Control | 6011 | RecName: Full=ATP synthase subunit g, mitochondrial; Short=A TPase subunit g               | gi 2493093, gi 7435401 | 11,604.00 | 100.00% | 3 | 4 | 7 | 0.05% | 33.70% | VELVPP<br>TPAEIPT<br>AIQSLK  | 3.06 | 2,003.14 |
| Control | 6011 | RecName: Full=ATP synthase subunit g, mitochondrial; Short=A TPase subunit g               | gi 2493093, gi 7435401 | 11,604.00 | 100.00% | 3 | 4 | 7 | 0.05% | 33.70% | VELVPP<br>TPAEIPT<br>AIQSLKK | 3.01 | 2,131.24 |

|         |      |                                                                                                                                                                                                                                                                                           |                                    |           |        |   |   |   |       |       |                         |      |          |
|---------|------|-------------------------------------------------------------------------------------------------------------------------------------------------------------------------------------------------------------------------------------------------------------------------------------------|------------------------------------|-----------|--------|---|---|---|-------|-------|-------------------------|------|----------|
| Control | 6011 | RecName gi 1102879 :<br>Full=Hea t shock protein<br>75 kDa,<br>mitochon<br>drial;<br>Short=H<br>SP 75;<br>AltName:<br>Full=Tu<br>mor<br>necrosis<br>factor<br>type 1<br>receptor-<br>associate<br>d protein;<br>Short=T<br>RAP-1;<br>AltName:<br>Full=TN<br>FR-<br>associate<br>d protein | 91.gi 83759<br>104.gi 8457<br>9841 | 79,365.10 | 99.80% | 2 | 2 | 2 | 0.02% | 5.97% | AFLDAL<br>QNQAEA<br>GSK | 4.25 | 1,562.78 |
| Control | 6011 | RecName gi 1102879 :<br>Full=Hea t shock protein<br>75 kDa,<br>mitochon<br>drial;<br>Short=H<br>SP 75;<br>AltName:<br>Full=Tu<br>mor<br>necrosis<br>factor<br>type 1<br>receptor-<br>associate<br>d protein;<br>Short=T<br>RAP-1;<br>AltName:<br>Full=TN<br>FR-<br>associate<br>d protein | 91.gi 83759<br>104.gi 8457<br>9841 | 79,365.10 | 99.80% | 2 | 2 | 2 | 0.02% | 5.97% | AQLLQP<br>TLEINPR       | 2.66 | 1,492.85 |

|         |      |                                                                                                                                                                                                                  |             |           |         |   |   |   |       |        |                                   |      |          |
|---------|------|------------------------------------------------------------------------------------------------------------------------------------------------------------------------------------------------------------------|-------------|-----------|---------|---|---|---|-------|--------|-----------------------------------|------|----------|
| Control | 6011 | RecName gi 1102879 :<br>Full=Heat shock protein 75 kDa, mitochondrial; Short=HSP 75; AltName: Full=Tumor necrosis factor type 1 receptor-associated protein; Short=TRAP-1; AltName: Full=TNFR-associated protein | 91.gi 83759 | 79,365.10 | 99.80%  | 2 | 2 | 2 | 0.02% | 5.97%  | GVVDSE<br>DIPLNLS<br>R            | 4.24 | 1,513.79 |
| Control | 6011 | guanine nucleotide binding protein (Gq polypeptide                                                                                                                                                               | gi 1585085  | 42,125.60 | 100.00% | 3 | 3 | 4 | 0.03% | 13.60% | VADPAY<br>LPTQQD<br>VLR           | 3.61 | 1,685.89 |
| Control | 6011 | guanine nucleotide binding protein (Gq polypeptide                                                                                                                                                               | gi 1585085  | 42,125.60 | 100.00% | 3 | 3 | 4 | 0.03% | 13.60% | VRVPTT<br>GIIYYPF<br>DLQSVIF<br>R | 4.24 | 2,450.34 |
| Control | 6011 | guanine nucleotide binding protein (Gq polypeptide                                                                                                                                                               | gi 1585085  | 42,125.60 | 100.00% | 3 | 3 | 4 | 0.03% | 13.60% | VSAFEN<br>PYVDAI<br>K             | 3.41 | 1,452.74 |
| Control | 6011 | PREDICTED: similar to CDW92 antigen isoform 1                                                                                                                                                                    | gi 1199009  | 72,875.80 | 100.00% | 3 | 3 | 3 | 0.02% | 6.25%  | LPVPAS<br>APIPFH<br>R             | 4.47 | 1,548.87 |
| Control | 6011 | PREDICTED: similar to CDW92 antigen isoform 1                                                                                                                                                                    | gi 1199009  | 72,875.80 | 100.00% | 3 | 3 | 3 | 0.02% | 6.25%  | NAELEAI<br>PNSGMD<br>HTHR         | 2.62 | 1,907.87 |

|         |      |                                                                                                                                                                                                     |                                                                   |           |         |   |   |   |       |        |                          |      |          |
|---------|------|-----------------------------------------------------------------------------------------------------------------------------------------------------------------------------------------------------|-------------------------------------------------------------------|-----------|---------|---|---|---|-------|--------|--------------------------|------|----------|
| Control | 6011 | PREDIC<br>TED:<br>similar to<br>CDW92<br>antigen<br>isoform 1                                                                                                                                       | gi 1199009<br>17,gi 11990<br>0919                                 | 72,875.80 | 100.00% | 3 | 3 | 3 | 0.02% | 6.25%  | VLMEFV<br>ENSR           | 3.56 | 1,239.60 |
| Control | 6011 | RecName<br>:<br>Full=60S<br>ribosomal<br>protein<br>L7a                                                                                                                                             | gi 1088609<br>39,gi 14623<br>1828,gi 836<br>38795,gi 94<br>966839 | 30,008.40 | 99.80%  | 2 | 2 | 4 | 0.03% | 10.20% | LKVPPAI<br>NQFTQA<br>LDR | 5.42 | 1,811.02 |
| Control | 6011 | RecName<br>:<br>Full=60S<br>ribosomal<br>protein<br>L7a                                                                                                                                             | gi 1088609<br>39,gi 14623<br>1828,gi 836<br>38795,gi 94<br>966839 | 30,008.40 | 99.80%  | 2 | 2 | 4 | 0.03% | 10.20% | NFGIGQ<br>DIQPK          | 3.31 | 1,216.63 |
| Control | 6011 | RecName<br>:<br>Full=Tra<br>nsgelin;<br>AltName:<br>Full=Smo<br>oth<br>muscle<br>protein<br>22-alpha;<br>Short=S<br>M22-<br>alpha;<br>AltName:<br>Full=25<br>kDa F-<br>actin-<br>binding<br>protein | gi 1099403<br>20,gi 11405<br>1586,gi 868<br>23808                 | 22,580.80 | 99.80%  | 2 | 2 | 2 | 0.02% | 11.90% | EFTESQL<br>QEGK          | 2.81 | 1,295.61 |
| Control | 6011 | RecName<br>:<br>Full=Tra<br>nsgelin;<br>AltName:<br>Full=Smo<br>oth<br>muscle<br>protein<br>22-alpha;<br>Short=S<br>M22-<br>alpha;<br>AltName:<br>Full=25<br>kDa F-<br>actin-<br>binding<br>protein | gi 1099403<br>20,gi 11405<br>1586,gi 868<br>23808                 | 22,580.80 | 99.80%  | 2 | 2 | 2 | 0.02% | 11.90% | TDMFQT<br>VDLFEG<br>K    | 2.91 | 1,546.71 |



|         |      |                                                                                                                                                                                             |                                                   |           |         |   |   |   |       |        |                            |      |          |
|---------|------|---------------------------------------------------------------------------------------------------------------------------------------------------------------------------------------------|---------------------------------------------------|-----------|---------|---|---|---|-------|--------|----------------------------|------|----------|
| Control | 6011 | RecName<br>:<br>Full=Euk<br>aryotic<br>initiation<br>factor 4A-<br>I;<br>Short=eI<br>F-4A-I;<br>Short=eI<br>F4A-I;<br>AltName:<br>Full=AT<br>P-<br>dependen<br>t RNA<br>helicase<br>eIF4A-1 | gi 1098924<br>71.gi 74268<br>155.gi 7773<br>5407  | 46,137.30 | 100.00% | 5 | 7 | 7 | 0.05% | 18.20% | LQMEAP<br>HIIVGTP<br>GR    | 3.53 | 1,634.87 |
| Control | 6011 | RecName<br>:<br>Full=Euk<br>aryotic<br>initiation<br>factor 4A-<br>I;<br>Short=eI<br>F-4A-I;<br>Short=eI<br>F4A-I;<br>AltName:<br>Full=AT<br>P-<br>dependen<br>t RNA<br>helicase<br>eIF4A-1 | gi 1098924<br>71.gi 74268<br>155.gi 7773<br>5407  | 46,137.30 | 100.00% | 5 | 7 | 7 | 0.05% | 18.20% | VLITDDL<br>LAR             | 3.41 | 1,114.68 |
| Control | 6011 | RecName<br>:<br>Full=Mit<br>ochondri<br>al Rho<br>GTPase<br>I;<br>Short=MI<br>RO-1;<br>AltName:<br>Full=Ras<br>homolog<br>gene<br>family<br>member<br>T1                                    | gi 1088607<br>95.gi 11405<br>1724.gi 886<br>82961 | 72,061.70 | 100.00% | 6 | 7 | 9 | 0.07% | 11.10% | FGYDDD<br>LDLTPE<br>YLFPLK | 2.56 | 2,274.12 |



|         |      |                                                                                                                                                          |                                                   |           |         |   |   |   |       |        |                                       |          |
|---------|------|----------------------------------------------------------------------------------------------------------------------------------------------------------|---------------------------------------------------|-----------|---------|---|---|---|-------|--------|---------------------------------------|----------|
| Control | 6011 | RecName<br>:<br>Full=Mit<br>ochondri<br>al Rho<br>GTPase<br>I;<br>Short=MI<br>RO-1;<br>AltName:<br>Full=Ras<br>homolog<br>gene<br>family<br>member<br>T1 | gi 1088607<br>95,gi 11405<br>1724,gi 886<br>82961 | 72,061.70 | 100.00% | 6 | 7 | 9 | 0.07% | 11.10% | ISDQDN 4.4<br>DGTLND<br>AELNFF<br>QR  | 2,312.04 |
| Control | 6011 | RecName<br>:<br>Full=Mit<br>ochondri<br>al Rho<br>GTPase<br>I;<br>Short=MI<br>RO-1;<br>AltName:<br>Full=Ras<br>homolog<br>gene<br>family<br>member<br>T1 | gi 1088607<br>95,gi 11405<br>1724,gi 886<br>82961 | 72,061.70 | 100.00% | 6 | 7 | 9 | 0.07% | 11.10% | LPLILVG 2.69<br>NK                    | 966.6348 |
| Control | 6011 | RecName<br>:<br>Full=Mit<br>ochondri<br>al Rho<br>GTPase<br>I;<br>Short=MI<br>RO-1;<br>AltName:<br>Full=Ras<br>homolog<br>gene<br>family<br>member<br>T1 | gi 1088607<br>95,gi 11405<br>1724,gi 886<br>82961 | 72,061.70 | 100.00% | 6 | 7 | 9 | 0.07% | 11.10% | NISELFY 3.4<br>YAQK                   | 1,375.69 |
| Control | 6011 | RecName<br>:<br>Full=Mit<br>ochondri<br>al Rho<br>GTPase<br>I;<br>Short=MI<br>RO-1;<br>AltName:<br>Full=Ras<br>homolog<br>gene<br>family<br>member<br>T1 | gi 1088607<br>95,gi 11405<br>1724,gi 886<br>82961 | 72,061.70 | 100.00% | 6 | 7 | 9 | 0.07% | 11.10% | RFGYDD 3.31<br>DLDLTP<br>EYLFPLL<br>K | 2,430.22 |

|         |      |                                                                                                                                                          |                                                   |            |         |    |    |    |       |        |                                                 |          |
|---------|------|----------------------------------------------------------------------------------------------------------------------------------------------------------|---------------------------------------------------|------------|---------|----|----|----|-------|--------|-------------------------------------------------|----------|
| Control | 6011 | RecName<br>:<br>Full=Mit<br>ochondri<br>al Rho<br>GTPase<br>1;<br>Short=MI<br>RO-1;<br>AltName:<br>Full=Ras<br>homolog<br>gene<br>family<br>member<br>T1 | gi 1088607<br>95.gi 11405<br>1724.gi 886<br>82961 | 72,061.70  | 100.00% | 6  | 7  | 9  | 0.07% | 11.10% | SGVLQA 2.9<br>LLGR                              | 1,013.61 |
| Control | 6011 | TMPO<br>protein                                                                                                                                          | gi 1461868<br>41.gi 14790<br>2328                 | 42,927.20  | 100.00% | 8  | 12 | 15 | 0.12% | 27.20% | DVYVQL 4.09<br>YLQHLT<br>AR                     | 1,718.92 |
| Control | 6011 | TMPO<br>protein                                                                                                                                          | gi 1461868<br>41.gi 14790<br>2328                 | 42,927.20  | 100.00% | 8  | 12 | 15 | 0.12% | 27.20% | GPPDFSS 5.86<br>DEEREP<br>TPVLGS<br>GAAVAG<br>R | 2,598.24 |
| Control | 6011 | TMPO<br>protein                                                                                                                                          | gi 1461868<br>41.gi 14790<br>2328                 | 42,927.20  | 100.00% | 8  | 12 | 15 | 0.12% | 27.20% | HAAPILP 3.91<br>ITEFSDIP<br>R                   | 1,776.96 |
| Control | 6011 | TMPO<br>protein                                                                                                                                          | gi 1461868<br>41.gi 14790<br>2328                 | 42,927.20  | 100.00% | 8  | 12 | 15 | 0.12% | 27.20% | LKSELV 5.59<br>ANNVTL<br>PAGEQR                 | 1,939.06 |
| Control | 6011 | TMPO<br>protein                                                                                                                                          | gi 1461868<br>41.gi 14790<br>2328                 | 42,927.20  | 100.00% | 8  | 12 | 15 | 0.12% | 27.20% | LKSELV 4.39<br>ANNVTL<br>PAGEQR<br>K            | 2,067.16 |
| Control | 6011 | TMPO<br>protein                                                                                                                                          | gi 1461868<br>41.gi 14790<br>2328                 | 42,927.20  | 100.00% | 8  | 12 | 15 | 0.12% | 27.20% | SELVAN 4.08<br>NVTLPA<br>GEQR                   | 1,697.88 |
| Control | 6011 | TMPO<br>protein                                                                                                                                          | gi 1461868<br>41.gi 14790<br>2328                 | 42,927.20  | 100.00% | 8  | 12 | 15 | 0.12% | 27.20% | SSTPLPT 3.43<br>ISSSVEN<br>TR                   | 1,675.85 |
| Control | 6011 | TMPO<br>protein                                                                                                                                          | gi 1461868<br>41.gi 14790<br>2328                 | 42,927.20  | 100.00% | 8  | 12 | 15 | 0.12% | 27.20% | YGVNPG 2.71<br>PIVGTR                           | 1,330.71 |
| Control | 6011 | PREDIC<br>TED:<br>talin 1                                                                                                                                | gi 1199005<br>17                                  | 269,759.80 | 100.00% | 12 | 13 | 14 | 0.11% | 7.83%  | ALSTDP 2.53<br>AAPTLLK                          | 1,184.65 |
| Control | 6011 | PREDIC<br>TED:<br>talin 1                                                                                                                                | gi 1199005<br>17                                  | 269,759.80 | 100.00% | 12 | 13 | 14 | 0.11% | 7.83%  | AVSSAIA 4.01<br>QLLGEV<br>AQGNEN<br>YAGIAA<br>R | 2,573.33 |
| Control | 6011 | PREDIC<br>TED:<br>talin 1                                                                                                                                | gi 1199005<br>17                                  | 269,759.80 | 100.00% | 12 | 13 | 14 | 0.11% | 7.83%  | GLAGAV 3.41<br>SELLR                            | 1,085.63 |
| Control | 6011 | PREDIC<br>TED:<br>talin 1                                                                                                                                | gi 1199005<br>17                                  | 269,759.80 | 100.00% | 12 | 13 | 14 | 0.11% | 7.83%  | GVGAAA 4.27<br>TAVTQA<br>LNELLQ<br>HVR          | 2,119.16 |
| Control | 6011 | PREDIC<br>TED:<br>talin 1                                                                                                                                | gi 1199005<br>17                                  | 269,759.80 | 100.00% | 12 | 13 | 14 | 0.11% | 7.83%  | LAQAAQ 3.63<br>SSVATIT<br>R                     | 1,416.78 |
| Control | 6011 | PREDIC<br>TED:<br>talin 1                                                                                                                                | gi 1199005<br>17                                  | 269,759.80 | 100.00% | 12 | 13 | 14 | 0.11% | 7.83%  | LNEAAA 2.68<br>GLNQAA<br>TELVQA<br>SR           | 2,027.05 |
| Control | 6011 | PREDIC<br>TED:<br>talin 1                                                                                                                                | gi 1199005<br>17                                  | 269,759.80 | 100.00% | 12 | 13 | 14 | 0.11% | 7.83%  | NLGTAL 2.56<br>AELR                             | 1,057.60 |

|         |      |                     |                                        |            |         |    |    |    |       |        |                                         |          |
|---------|------|---------------------|----------------------------------------|------------|---------|----|----|----|-------|--------|-----------------------------------------|----------|
| Control | 6011 | PREDIC TED: talin 1 | gi 119900517                           | 269,759.80 | 100.00% | 12 | 13 | 14 | 0.11% | 7.83%  | QAAASA 3<br>TQTIAA<br>AQHATS<br>TPK     | 2,025.04 |
| Control | 6011 | PREDIC TED: talin 1 | gi 119900517                           | 269,759.80 | 100.00% | 12 | 13 | 14 | 0.11% | 7.83%  | TLSHPQ 4.05<br>QMALLD<br>QTK            | 1,726.88 |
| Control | 6011 | PREDIC TED: talin 1 | gi 119900517                           | 269,759.80 | 100.00% | 12 | 13 | 14 | 0.11% | 7.83%  | TMLESA 3.38<br>GGLIQT<br>AR             | 1,463.75 |
| Control | 6011 | PREDIC TED: talin 1 | gi 119900517                           | 269,759.80 | 100.00% | 12 | 13 | 14 | 0.11% | 7.83%  | VLGEAM 3.83<br>TGISQNA<br>K             | 1,434.73 |
| Control | 6011 | PREDIC TED: talin 1 | gi 119900517                           | 269,759.80 | 100.00% | 12 | 13 | 14 | 0.11% | 7.83%  | VSQMAQ 4.27<br>YFEPLTL<br>AAVGAA<br>SK  | 2,198.12 |
| Control | 6011 | TMEM2 14 protein    | gi 133778127,gi 134085813,gi 205830924 | 77,001.60  | 99.90%  | 2  | 3  | 3  | 0.02% | 4.95%  | SLSPFAI 3.39<br>AYLDR                   | 1,352.72 |
| Control | 6011 | TMEM2 14 protein    | gi 133778127,gi 134085813,gi 205830924 | 77,001.60  | 99.90%  | 2  | 3  | 3  | 0.02% | 4.95%  | VLAFGA 4.23<br>KPESTL<br>HTYFPSF<br>LSR | 2,468.30 |
| Control | 6011 | SLC25A 12 protein   | gi 151556133,gi 155372111              | 74,513.90  | 100.00% | 18 | 19 | 25 | 0.20% | 36.00% | DLGLFG 2.21<br>LYK                      | 1,025.57 |
| Control | 6011 | SLC25A 12 protein   | gi 151556133,gi 155372111              | 74,513.90  | 100.00% | 18 | 19 | 25 | 0.20% | 36.00% | FGLYLP 2.67<br>K                        | 837.487  |
| Control | 6011 | SLC25A 12 protein   | gi 151556133,gi 155372111              | 74,513.90  | 100.00% | 18 | 19 | 25 | 0.20% | 36.00% | FKPPSVA 3.24<br>VVQPK                   | 1,296.77 |
| Control | 6011 | SLC25A 12 protein   | gi 151556133,gi 155372111              | 74,513.90  | 100.00% | 18 | 19 | 25 | 0.20% | 36.00% | FTLGSV 4.01<br>AGAVGA<br>TAVYPID<br>LVK | 2,149.19 |
| Control | 6011 | SLC25A 12 protein   | gi 151556133,gi 155372111              | 74,513.90  | 100.00% | 18 | 19 | 25 | 0.20% | 36.00% | GLIPQLI 2.55<br>GVAPEK                  | 1,334.80 |
| Control | 6011 | SLC25A 12 protein   | gi 151556133,gi 155372111              | 74,513.90  | 100.00% | 18 | 19 | 25 | 0.20% | 36.00% | GTGSVV 3<br>GELMYK                      | 1,256.62 |
| Control | 6011 | SLC25A 12 protein   | gi 151556133,gi 155372111              | 74,513.90  | 100.00% | 18 | 19 | 25 | 0.20% | 36.00% | HLNYTE 6.02<br>FTQFLQE<br>LQLEHA<br>R   | 2,517.25 |
| Control | 6011 | SLC25A 12 protein   | gi 151556133,gi 155372111              | 74,513.90  | 100.00% | 18 | 19 | 25 | 0.20% | 36.00% | IAPLAEG 3.6<br>ALPYNL<br>AELQR          | 1,939.06 |
| Control | 6011 | SLC25A 12 protein   | gi 151556133,gi 155372111              | 74,513.90  | 100.00% | 18 | 19 | 25 | 0.20% | 36.00% | IVQLLAG 3.88<br>VADQTK                  | 1,355.79 |
| Control | 6011 | SLC25A 12 protein   | gi 151556133,gi 155372111              | 74,513.90  | 100.00% | 18 | 19 | 25 | 0.20% | 36.00% | KIYSTLA 3.06<br>GTR                     | 1,109.63 |
| Control | 6011 | SLC25A 12 protein   | gi 151556133,gi 155372111              | 74,513.90  | 100.00% | 18 | 19 | 25 | 0.20% | 36.00% | LQVAGEI 3<br>TTGPR                      | 1,241.69 |
| Control | 6011 | SLC25A 12 protein   | gi 151556133,gi 155372111              | 74,513.90  | 100.00% | 18 | 19 | 25 | 0.20% | 36.00% | LTLADIE 2.33<br>R                       | 930.5256 |
| Control | 6011 | SLC25A 12 protein   | gi 151556133,gi 155372111              | 74,513.90  | 100.00% | 18 | 19 | 25 | 0.20% | 36.00% | LTVNDF 2.17<br>VR                       | 963.5258 |

|         |      |                                                                                                                |                                                               |           |         |    |    |    |       |        |                                            |          |
|---------|------|----------------------------------------------------------------------------------------------------------------|---------------------------------------------------------------|-----------|---------|----|----|----|-------|--------|--------------------------------------------|----------|
| Control | 6011 | SLC25A12 protein                                                                                               | gi 151556133,gi 155372111                                     | 74,513.90 | 100.00% | 18 | 19 | 25 | 0.20% | 36.00% | NIFLQYA 4.43<br>STEVDG<br>EHYMTP<br>EDFVQR | 3,005.36 |
| Control | 6011 | SLC25A12 protein                                                                                               | gi 151556133,gi 155372111                                     | 74,513.90 | 100.00% | 18 | 19 | 25 | 0.20% | 36.00% | VSALNV 2.41<br>LR                          | 871.5359 |
| Control | 6011 | SLC25A12 protein                                                                                               | gi 151556133,gi 155372111                                     | 74,513.90 | 100.00% | 18 | 19 | 25 | 0.20% | 36.00% | YEGFFG 2.93<br>LYR                         | 1,151.55 |
| Control | 6011 | SLC25A12 protein                                                                                               | gi 151556133,gi 155372111                                     | 74,513.90 | 100.00% | 18 | 19 | 25 | 0.20% | 36.00% | YGQVTP 4.52<br>LEIDILY<br>QLSDLY<br>NATGR  | 2,742.40 |
| Control | 6011 | SLC25A12 protein                                                                                               | gi 151556133,gi 155372111                                     | 74,513.90 | 100.00% | 18 | 19 | 25 | 0.20% | 36.00% | YLGLYN 3.66<br>DPNSNP<br>K                 | 1,494.72 |
| Control | 6011 | RecName : Full=Elec tron transfer flavoprotein subunit alpha, mitochondrial; Short=Alpha-ETF; Flags: Precursor | gi 110808222,gi 115496196,gi 86823828                         | 34,944.00 | 99.80%  | 2  | 3  | 3  | 0.02% | 8.71%  | GLLPEEL 2.84<br>TPLLAT<br>QK               | 1,736.02 |
| Control | 6011 | RecName : Full=Elec tron transfer flavoprotein subunit alpha, mitochondrial; Short=Alpha-ETF; Flags: Precursor | gi 110808222,gi 115496196,gi 86823828                         | 34,944.00 | 99.80%  | 2  | 3  | 3  | 0.02% | 8.71%  | LDVAPIS 2.83<br>DIIAIK                     | 1,367.81 |
| Control | 6011 | RecName : Full=Cytochrome b5                                                                                   | gi 117806,gi 1372997,gi 15783077,gi 278066,gi 298,gi 79160196 | 15,311.60 | 100.00% | 2  | 2  | 2  | 0.02% | 25.40% | EQAGGD 3.1<br>ATENFE<br>DVGHST<br>DAR      | 2,205.93 |
| Control | 6011 | RecName : Full=Cytochrome b5                                                                                   | gi 117806,gi 1372997,gi 15783077,gi 278066,gi 298,gi 79160196 | 15,311.60 | 100.00% | 2  | 2  | 2  | 0.02% | 25.40% | FLEEHPG 2.21<br>GEEVLR                     | 1,511.75 |
| Control | 6011 | ALDH3A2 protein                                                                                                | gi 151557095,gi 156120617                                     | 54,059.30 | 100.00% | 4  | 4  | 4  | 0.03% | 10.30% | EKDILAA 3.39<br>IGADLSK                    | 1,443.81 |

|         |      |                                                  |                                                             |            |         |    |    |    |       |        |                        |      |          |
|---------|------|--------------------------------------------------|-------------------------------------------------------------|------------|---------|----|----|----|-------|--------|------------------------|------|----------|
| Control | 6011 | ALDH3A2 protein                                  | gi 151557095,gi 156120617                                   | 54,059.30  | 100.00% | 4  | 4  | 4  | 0.03% | 10.30% | HLPVPT<br>LELGK        | 2.92 | 1,264.73 |
| Control | 6011 | ALDH3A2 protein                                  | gi 151557095,gi 156120617                                   | 54,059.30  | 100.00% | 4  | 4  | 4  | 0.03% | 10.30% | IAFGGE<br>MDEATR       | 2.71 | 1,312.58 |
| Control | 6011 | ALDH3A2 protein                                  | gi 151557095,gi 156120617                                   | 54,059.30  | 100.00% | 4  | 4  | 4  | 0.03% | 10.30% | NADEAI<br>QFINER       | 3.44 | 1,419.69 |
| Control | 6011 | IKK interactin g protein                         | gi 126010633,gi 126165284,gi 193806036                      | 39,199.60  | 99.80%  | 2  | 2  | 2  | 0.02% | 6.59%  | LEPLVN<br>DLTLR        | 2.76 | 1,282.74 |
| Control | 6011 | IKK interactin g protein                         | gi 126010633,gi 126165284,gi 193806036                      | 39,199.60  | 99.80%  | 2  | 2  | 2  | 0.02% | 6.59%  | METSEF<br>QGLQSK       | 3.87 | 1,400.64 |
| Control | 6011 | defender against cell death 1                    | gi 59858361,gi 73918963,gi 74354770,gi 77736467,gi 83286811 | 12,477.50  | 99.80%  | 2  | 2  | 5  | 0.04% | 19.50% | ADFQGIS<br>PER         | 3.07 | 1,119.54 |
| Control | 6011 | defender against cell death 1                    | gi 59858361,gi 73918963,gi 74354770,gi 77736467,gi 83286811 | 12,477.50  | 99.80%  | 2  | 2  | 5  | 0.04% | 19.50% | FLEEYLS<br>ATPQR       | 3    | 1,453.73 |
| Control | 6011 | PREDICTED: similar to optic atrophy 1 isoform 16 | gi 194663697                                                | 115,574.20 | 100.00% | 14 | 16 | 18 | 0.14% | 19.70% | ALGYFA<br>VVTGK        | 3.1  | 1,125.63 |
| Control | 6011 | PREDICTED: similar to optic atrophy 1 isoform 16 | gi 194663697                                                | 115,574.20 | 100.00% | 14 | 16 | 18 | 0.14% | 19.70% | DFFTTGS<br>PGETAF<br>R | 2.96 | 1,532.70 |
| Control | 6011 | PREDICTED: similar to optic atrophy 1 isoform 16 | gi 194663697                                                | 115,574.20 | 100.00% | 14 | 16 | 18 | 0.14% | 19.70% | EFDLTK<br>EEDLAA<br>LR | 3.48 | 1,649.84 |
| Control | 6011 | PREDICTED: similar to optic atrophy 1 isoform 16 | gi 194663697                                                | 115,574.20 | 100.00% | 14 | 16 | 18 | 0.14% | 19.70% | ESVEQQ<br>ADSFK        | 3.64 | 1,267.58 |
| Control | 6011 | PREDICTED: similar to optic atrophy 1 isoform 16 | gi 194663697                                                | 115,574.20 | 100.00% | 14 | 16 | 18 | 0.14% | 19.70% | EVLEDF<br>AEDSEK       | 3.01 | 1,410.63 |

|         |      |                                                         |                                                               |            |         |    |    |    |       |        |                                                      |          |
|---------|------|---------------------------------------------------------|---------------------------------------------------------------|------------|---------|----|----|----|-------|--------|------------------------------------------------------|----------|
| Control | 6011 | PREDIC TED: 97<br>similar to optic atrophy 1 isoform 16 | gi 1946636                                                    | 115,574.20 | 100.00% | 14 | 16 | 18 | 0.14% | 19.70% | GNSSESI 4.05<br>EAIRDYE<br>EEFFQNS<br>K              | 2,579.15 |
| Control | 6011 | PREDIC TED: 97<br>similar to optic atrophy 1 isoform 16 | gi 1946636                                                    | 115,574.20 | 100.00% | 14 | 16 | 18 | 0.14% | 19.70% | IDQLQEE 2.85<br>LLHTQL<br>K                          | 1,707.93 |
| Control | 6011 | PREDIC TED: 97<br>similar to optic atrophy 1 isoform 16 | gi 1946636                                                    | 115,574.20 | 100.00% | 14 | 16 | 18 | 0.14% | 19.70% | LAPPDFD 3.28<br>KIAESLS<br>LLKDFFT<br>TGSPGE<br>TAFR | 3,273.67 |
| Control | 6011 | PREDIC TED: 97<br>similar to optic atrophy 1 isoform 16 | gi 1946636                                                    | 115,574.20 | 100.00% | 14 | 16 | 18 | 0.14% | 19.70% | LDAFIEA 2.11<br>LHQEK                                | 1,413.74 |
| Control | 6011 | PREDIC TED: 97<br>similar to optic atrophy 1 isoform 16 | gi 1946636                                                    | 115,574.20 | 100.00% | 14 | 16 | 18 | 0.14% | 19.70% | MLAITA 3.14<br>NTRL                                  | 1,119.62 |
| Control | 6011 | PREDIC TED: 97<br>similar to optic atrophy 1 isoform 16 | gi 1946636                                                    | 115,574.20 | 100.00% | 14 | 16 | 18 | 0.14% | 19.70% | SIVTDLV 2.24<br>SQMDPH<br>GR                         | 1,670.82 |
| Control | 6011 | PREDIC TED: 97<br>similar to optic atrophy 1 isoform 16 | gi 1946636                                                    | 115,574.20 | 100.00% | 14 | 16 | 18 | 0.14% | 19.70% | SLIDMYS 4.36<br>EVLVDL<br>SDYDAS<br>YNTQDH<br>LPR    | 3,275.51 |
| Control | 6011 | PREDIC TED: 97<br>similar to optic atrophy 1 isoform 16 | gi 1946636                                                    | 115,574.20 | 100.00% | 14 | 16 | 18 | 0.14% | 19.70% | TSVLEMI 3.68<br>AQAR                                 | 1,218.65 |
| Control | 6011 | PREDIC TED: 97<br>similar to optic atrophy 1 isoform 16 | gi 1946636                                                    | 115,574.20 | 100.00% | 14 | 16 | 18 | 0.14% | 19.70% | VSDKEKI 4.85<br>DQLQEE<br>LLHTQL<br>K                | 2,394.29 |
| Control | 6011 | Prostaglandin I2 (prostacyclin) synthase                | gi 1123623<br>85,gi 24933<br>72,gi 27806<br>107,gi 5385<br>23 | 56,613.60  | 100.00% | 9  | 13 | 22 | 0.17% | 26.00% | ELQALT 3.44<br>DAMYTN<br>LR                          | 1,654.81 |

|         |      |                                                                                           |                                                               |           |         |   |    |    |       |        |                                                           |      |          |
|---------|------|-------------------------------------------------------------------------------------------|---------------------------------------------------------------|-----------|---------|---|----|----|-------|--------|-----------------------------------------------------------|------|----------|
| Control | 6011 | Prostagla<br>ndin I2<br>(prostacy<br>clin)<br>synthase                                    | gi 1123623<br>85,gi 24933<br>72,gi 27806<br>107,gi 5385<br>23 | 56,613.60 | 100.00% | 9 | 13 | 22 | 0.17% | 26.00% | EVVADL<br>ALPMAD<br>GR                                    | 3.37 | 1,472.74 |
| Control | 6011 | Prostagla<br>ndin I2<br>(prostacy<br>clin)<br>synthase                                    | gi 1123623<br>85,gi 24933<br>72,gi 27806<br>107,gi 5385<br>23 | 56,613.60 | 100.00% | 9 | 13 | 22 | 0.17% | 26.00% | GELETV<br>LLGAEQ<br>PISQMTT<br>LPQK                       | 3.31 | 2,483.31 |
| Control | 6011 | Prostagla<br>ndin I2<br>(prostacy<br>clin)<br>synthase                                    | gi 1123623<br>85,gi 24933<br>72,gi 27806<br>107,gi 5385<br>23 | 56,613.60 | 100.00% | 9 | 13 | 22 | 0.17% | 26.00% | IFDVQLP<br>HYNPGD<br>EK                                   | 3.19 | 1,771.87 |
| Control | 6011 | Prostagla<br>ndin I2<br>(prostacy<br>clin)<br>synthase                                    | gi 1123623<br>85,gi 24933<br>72,gi 27806<br>107,gi 5385<br>23 | 56,613.60 | 100.00% | 9 | 13 | 22 | 0.17% | 26.00% | LLLFPFL<br>SPQK                                           | 3.15 | 1,302.78 |
| Control | 6011 | Prostagla<br>ndin I2<br>(prostacy<br>clin)<br>synthase                                    | gi 1123623<br>85,gi 24933<br>72,gi 27806<br>107,gi 5385<br>23 | 56,613.60 | 100.00% | 9 | 13 | 22 | 0.17% | 26.00% | LLLFPFL<br>SPQKDP<br>EIYTDPE<br>VFK                       | 5.86 | 2,736.45 |
| Control | 6011 | Prostagla<br>ndin I2<br>(prostacy<br>clin)<br>synthase                                    | gi 1123623<br>85,gi 24933<br>72,gi 27806<br>107,gi 5385<br>23 | 56,613.60 | 100.00% | 9 | 13 | 22 | 0.17% | 26.00% | LTAAPFI<br>TR                                             | 2.96 | 989.5779 |
| Control | 6011 | Prostagla<br>ndin I2<br>(prostacy<br>clin)<br>synthase                                    | gi 1123623<br>85,gi 24933<br>72,gi 27806<br>107,gi 5385<br>23 | 56,613.60 | 100.00% | 9 | 13 | 22 | 0.17% | 26.00% | VLDSMP<br>VLDSVL<br>SESLR                                 | 5.07 | 1,875.97 |
| Control | 6011 | Prostagla<br>ndin I2<br>(prostacy<br>clin)<br>synthase                                    | gi 1123623<br>85,gi 24933<br>72,gi 27806<br>107,gi 5385<br>23 | 56,613.60 | 100.00% | 9 | 13 | 22 | 0.17% | 26.00% | YGFGLM<br>QPEHDV<br>PVR                                   | 2.73 | 1,760.84 |
| Control | 6011 | PREDIC<br>TED:<br>heterogen<br>eous<br>nuclear<br>ribonucle<br>oprotein<br>M<br>isoform 2 | gi 1198948<br>63                                              | 77,466.20 | 100.00% | 3 | 3  | 3  | 0.02% | 9.73%  | AFITNIPF<br>DVK                                           | 4    | 1,264.69 |
| Control | 6011 | PREDIC<br>TED:<br>heterogen<br>eous<br>nuclear<br>ribonucle<br>oprotein<br>M<br>isoform 2 | gi 1198948<br>63                                              | 77,466.20 | 100.00% | 3 | 3  | 3  | 0.02% | 9.73%  | GDFFPPE<br>RPQQLP<br>HGLGGI<br>GMGLGP<br>GGQPID<br>ANHLNK | 3.23 | 3,834.91 |
| Control | 6011 | PREDIC<br>TED:<br>heterogen<br>eous<br>nuclear<br>ribonucle<br>oprotein<br>M<br>isoform 2 | gi 1198948<br>63                                              | 77,466.20 | 100.00% | 3 | 3  | 3  | 0.02% | 9.73%  | GNFGGS<br>FAGSFG<br>GAGGHA<br>PGVAR                       | 3.16 | 2,034.95 |

|         |      |               |                                                                          |           |         |   |   |   |       |        |                                                                      |          |
|---------|------|---------------|--------------------------------------------------------------------------|-----------|---------|---|---|---|-------|--------|----------------------------------------------------------------------|----------|
| Control | 6011 | metalloprote  | gi 1044811, gi 1577429, gi 1577429, gi 2780633, gi 27806209, gi 29839751 | 84,171.20 | 100.00% | 3 | 3 | 3 | 0.02% | 5.75%  | AIDTIYQ 3.68<br>TTDFSGI<br>R                                         | 1,700.85 |
| Control | 6011 | metalloprote  | gi 1044811, gi 1577429, gi 1577429, gi 2780633, gi 27806209, gi 29839751 | 84,171.20 | 100.00% | 3 | 3 | 3 | 0.02% | 5.75%  | HYEGLS 3.96<br>YDVDSL<br>HQB                                         | 1,790.83 |
| Control | 6011 | metalloprote  | gi 1044811, gi 1577429, gi 1577429, gi 2780633, gi 27806209, gi 29839751 | 84,171.20 | 100.00% | 3 | 3 | 3 | 0.02% | 5.75%  | LPPPKPL 1.79<br>PGTLKR                                               | 1,413.89 |
| Control | 6011 | tubulin, beta | gi 1140527, gi 1462331, gi 146231774, gi 86823832                        | 49,652.60 | 100.00% | 3 | 4 | 8 | 0.06% | 44.60% | AILVDLE 3.87<br>PGTMDS<br>VR                                         | 1,631.83 |
| Control | 6011 | tubulin, beta | gi 1140527, gi 1462331, gi 146231774, gi 86823832                        | 49,652.60 | 100.00% | 3 | 4 | 8 | 0.06% | 44.60% | ALTVEPE 4.32<br>LTQQVF<br>DAK                                        | 1,659.90 |
| Control | 6011 | tubulin, beta | gi 1140527, gi 1462331, gi 146231774, gi 86823832                        | 49,652.60 | 100.00% | 3 | 4 | 8 | 0.06% | 44.60% | EAESCD 3.41<br>CLQGFQ<br>LTHSLG<br>GGTGSG<br>MGTLIS<br>K             | 3,213.49 |
| Control | 6011 | tubulin, beta | gi 1140527, gi 1462331, gi 146231774, gi 86823832                        | 49,652.60 | 100.00% | 3 | 4 | 8 | 0.06% | 44.60% | FPGQLN 3.12<br>ADLRK                                                 | 1,258.69 |
| Control | 6011 | tubulin, beta | gi 1140527, gi 1462331, gi 146231774, gi 86823832                        | 49,652.60 | 100.00% | 3 | 4 | 8 | 0.06% | 44.60% | GHYTEG 3.66<br>AELVDS<br>VLDVVR                                      | 1,958.98 |
| Control | 6011 | tubulin, beta | gi 1140527, gi 1462331, gi 146231774, gi 86823832                        | 49,652.60 | 100.00% | 3 | 4 | 8 | 0.06% | 44.60% | GHYTEG 3.32<br>AELVDS<br>VLDVVR<br>K                                 | 2,087.08 |
| Control | 6011 | tubulin, beta | gi 1140527, gi 1462331, gi 146231774, gi 86823832                        | 49,652.60 | 100.00% | 3 | 4 | 8 | 0.06% | 44.60% | IMNTFSV 4.39<br>VSPK                                                 | 1,335.70 |
| Control | 6011 | tubulin, beta | gi 1140527, gi 1462331, gi 146231774, gi 86823832                        | 49,652.60 | 100.00% | 3 | 4 | 8 | 0.06% | 44.60% | ISEQFTA 2.98<br>MFR                                                  | 1,245.59 |
| Control | 6011 | tubulin, beta | gi 1140527, gi 1462331, gi 146231774, gi 86823832                        | 49,652.60 | 100.00% | 3 | 4 | 8 | 0.06% | 44.60% | ISVYYNE 2.93<br>ATGGK                                                | 1,301.64 |
| Control | 6011 | tubulin, beta | gi 1140527, gi 1462331, gi 146231774, gi 86823832                        | 49,652.60 | 100.00% | 3 | 4 | 8 | 0.06% | 44.60% | LAVNMV 3.55<br>PFPR                                                  | 1,159.63 |
| Control | 6011 | tubulin, beta | gi 1140527, gi 1462331, gi 146231774, gi 86823832                        | 49,652.60 | 100.00% | 3 | 4 | 8 | 0.06% | 44.60% | LHFMP 3.66<br>GFAPLTS<br>R                                           | 1,620.84 |
| Control | 6011 | tubulin, beta | gi 1140527, gi 1462331, gi 146231774, gi 86823832                        | 49,652.60 | 100.00% | 3 | 4 | 8 | 0.06% | 44.60% | VSDTVV 4.94<br>EPYNAT<br>LSVHQL<br>VENTDE<br>TYCIDNE<br>ALYDICF<br>R | 4,479.06 |



|         |      |                                                                                                                                |                                       |           |         |   |   |   |       |        |                           |      |          |
|---------|------|--------------------------------------------------------------------------------------------------------------------------------|---------------------------------------|-----------|---------|---|---|---|-------|--------|---------------------------|------|----------|
| Control | 6011 | tubulin, beta                                                                                                                  | gi 114052731,gi 146231774,gi 86823832 | 49,652.60 | 100.00% | 3 | 4 | 8 | 0.06% | 44.60% | YLTVAA VFR                | 2.56 | 1,039.59 |
| Control | 6011 | RecName : Full=T-complex protein 1 subunit beta; Short=T CP-1-beta; AltName: Full=CC T-beta                                    | gi 115305838,gi 73586876,gi 77735435  | 57,458.70 | 100.00% | 2 | 3 | 4 | 0.03% | 7.10%  | QALLNS AVDHGS DEVK        | 2.6  | 1,682.83 |
| Control | 6011 | RecName : Full=T-complex protein 1 subunit beta; Short=T CP-1-beta; AltName: Full=CC T-beta                                    | gi 115305838,gi 73586876,gi 77735435  | 57,458.70 | 100.00% | 2 | 3 | 4 | 0.03% | 7.10%  | VQDDEV GDGTTS VTVLAA ELLR | 4.36 | 2,288.16 |
| Control | 6011 | melanoma cell adhesion molecule                                                                                                | gi 2323281                            | 9,468.30  | 99.80%  | 2 | 3 | 5 | 0.04% | 22.10% | SDKLPEE MGLLQG SSGDK      | 5.52 | 1,906.91 |
| Control | 6011 | melanoma cell adhesion molecule                                                                                                | gi 2323281                            | 9,468.30  | 99.80%  | 2 | 3 | 5 | 0.04% | 22.10% | SDKLPEE MGLLQG SSGDKR     | 4.18 | 2,063.01 |
| Control | 6011 | RecName : Full=Ornithine aminotransferase, mitochondrial; AltName: Full=Ornithine--oxo-acid aminotransferase; Flags: Precursor | gi 122140925,gi 73586966,gi 77735431  | 48,058.30 | 100.00% | 7 | 7 | 8 | 0.06% | 30.80% | AFYNNV LGYEYEE YVTK       | 3.06 | 1,938.91 |

|         |      |                                                                                                                                                                                                                           |           |         |   |   |   |       |        |                                                            |          |
|---------|------|---------------------------------------------------------------------------------------------------------------------------------------------------------------------------------------------------------------------------|-----------|---------|---|---|---|-------|--------|------------------------------------------------------------|----------|
| Control | 6011 | RecName gi 1221409<br>: 25.gi 73586<br>Full=Orni 966.gi 7773<br>thine 5431<br>aminotra<br>nsferase,<br>mitochon<br>drial;<br>AltName:<br>Full=Orni<br>thine--<br>oxo-acid<br>aminotra<br>nsferase;<br>Flags:<br>Precursor | 48,058.30 | 100.00% | 7 | 7 | 8 | 0.06% | 30.80% | ALQDPN 3.54<br>VAAFMV<br>EPIQGEA<br>GVVVPD<br>PGYLVG<br>VR | 3,423.76 |
| Control | 6011 | RecName gi 1221409<br>: 25.gi 73586<br>Full=Orni 966.gi 7773<br>thine 5431<br>aminotra<br>nsferase,<br>mitochon<br>drial;<br>AltName:<br>Full=Orni<br>thine--<br>oxo-acid<br>aminotra<br>nsferase;<br>Flags:<br>Precursor | 48,058.30 | 100.00% | 7 | 7 | 8 | 0.06% | 30.80% | GLLNAIV 2.87<br>IR                                         | 968.6252 |
| Control | 6011 | RecName gi 1221409<br>: 25.gi 73586<br>Full=Orni 966.gi 7773<br>thine 5431<br>aminotra<br>nsferase,<br>mitochon<br>drial;<br>AltName:<br>Full=Orni<br>thine--<br>oxo-acid<br>aminotra<br>nsferase;<br>Flags:<br>Precursor | 48,058.30 | 100.00% | 7 | 7 | 8 | 0.06% | 30.80% | NELMKL 3.97<br>PSDVVT<br>TVR                               | 1,717.92 |

|         |      |                                                                                                                                                                                   |                                                    |           |         |   |   |   |       |        |                                                                           |      |          |
|---------|------|-----------------------------------------------------------------------------------------------------------------------------------------------------------------------------------|----------------------------------------------------|-----------|---------|---|---|---|-------|--------|---------------------------------------------------------------------------|------|----------|
| Control | 6011 | RecName<br>:<br>Full=Orni<br>thine<br>aminotra<br>nsferase,<br>mitochon<br>drial;<br>AltName:<br>Full=Orni<br>thine--<br>oxo-acid<br>aminotra<br>nsferase;<br>Flags:<br>Precursor | gi 1221409<br>25,gi 73586<br>966,gi 7773<br>5431   | 48,058.30 | 100.00% | 7 | 7 | 8 | 0.06% | 30.80% | SQVDKL<br>TLTSR                                                           | 3.48 | 1,247.70 |
| Control | 6011 | RecName<br>:<br>Full=Orni<br>thine<br>aminotra<br>nsferase,<br>mitochon<br>drial;<br>AltName:<br>Full=Orni<br>thine--<br>oxo-acid<br>aminotra<br>nsferase;<br>Flags:<br>Precursor | gi 1221409<br>25,gi 73586<br>966,gi 7773<br>5431   | 48,058.30 | 100.00% | 7 | 7 | 8 | 0.06% | 30.80% | TLSAISS<br>STDPTS<br>Y<br>DGF<br>GPF<br>MPGF<br>EII<br>PYND<br>LP<br>ALER | 3.34 | 4,021.91 |
| Control | 6011 | RecName<br>:<br>Full=Orni<br>thine<br>aminotra<br>nsferase,<br>mitochon<br>drial;<br>AltName:<br>Full=Orni<br>thine--<br>oxo-acid<br>aminotra<br>nsferase;<br>Flags:<br>Precursor | gi 1221409<br>25,gi 73586<br>966,gi 7773<br>5431   | 48,058.30 | 100.00% | 7 | 7 | 8 | 0.06% | 30.80% | TVQGPP<br>SSDYIFE<br>R                                                    | 2.67 | 1,595.77 |
| Control | 6011 | RAP2B<br>protein                                                                                                                                                                  | gi 1340251<br>88,gi 15442<br>5870,gi 156<br>523174 | 20,470.40 | 99.80%  | 2 | 2 | 2 | 0.02% | 14.80% | EIEVDSS<br>PSVLEIL<br>DTAGTE<br>QFASMR                                    | 4.31 | 2,840.35 |
| Control | 6011 | RAP2B<br>protein                                                                                                                                                                  | gi 1340251<br>88,gi 15442<br>5870,gi 156<br>523174 | 20,470.40 | 99.80%  | 2 | 2 | 2 | 0.02% | 14.80% | KEIEVDS<br>SPSVLEI<br>LDTAGT<br>EQFASM<br>R                               | 3.55 | 2,968.45 |

|         |      |                                                                               |                                                                                                  |            |         |    |    |     |       |        |                             |      |          |
|---------|------|-------------------------------------------------------------------------------|--------------------------------------------------------------------------------------------------|------------|---------|----|----|-----|-------|--------|-----------------------------|------|----------|
| Control | 6011 | RecName<br>:<br>Full=Tra<br>nsmembr<br>ane<br>protein<br>111                  | gi 1153118<br>72,gi 73587<br>331,gi 7805<br>0079                                                 | 29,903.00  | 99.80%  | 2  | 2  | 2   | 0.02% | 8.43%  | LTQEQV<br>SDSQVLI<br>R      | 3.84 | 1,615.87 |
| Control | 6011 | RecName<br>:<br>Full=Tra<br>nsmembr<br>ane<br>protein<br>111                  | gi 1153118<br>72,gi 73587<br>331,gi 7805<br>0079                                                 | 29,903.00  | 99.80%  | 2  | 2  | 2   | 0.02% | 8.43%  | VPFPLTL<br>R                | 2.17 | 942.5772 |
| Control | 6011 | Hemoglo<br>bin,<br>gamma 2                                                    | gi 1584550<br>08,gi 16033<br>3301,gi 393<br>,gi 6246049<br>4                                     | 15,841.20  | 100.00% | 4  | 5  | 110 | 0.86% | 38.60% | FFESFGD<br>LSSADAI<br>LGNPK | 3.51 | 2,014.98 |
| Control | 6011 | Hemoglo<br>bin,<br>gamma 2                                                    | gi 1584550<br>08,gi 16033<br>3301,gi 393<br>,gi 6246049<br>4                                     | 15,841.20  | 100.00% | 4  | 5  | 110 | 0.86% | 38.60% | LLGNVL<br>VVVLAR            | 4.48 | 1,265.83 |
| Control | 6011 | Hemoglo<br>bin,<br>gamma 2                                                    | gi 1584550<br>08,gi 16033<br>3301,gi 393<br>,gi 6246049<br>4                                     | 15,841.20  | 100.00% | 4  | 5  | 110 | 0.86% | 38.60% | VKVDEV<br>GGEALG<br>R       | 3.2  | 1,328.72 |
| Control | 6011 | Hemoglo<br>bin,<br>gamma 2                                                    | gi 1584550<br>08,gi 16033<br>3301,gi 393<br>,gi 6246049<br>4                                     | 15,841.20  | 100.00% | 4  | 5  | 110 | 0.86% | 38.60% | VVTGVA<br>NALAHR            | 4.14 | 1,207.69 |
| Control | 6011 | Ribosom<br>al protein<br>L6                                                   | gi 1267173<br>93,gi 58760<br>432,gi 6155<br>3343,gi 615<br>53350,gi 67<br>461090,gi 7<br>2534798 | 32,672.90  | 99.80%  | 2  | 3  | 3   | 0.02% | 11.10% | ASITPGT<br>ILILTGR          | 4.18 | 1,525.93 |
| Control | 6011 | Ribosom<br>al protein<br>L6                                                   | gi 1267173<br>93,gi 58760<br>432,gi 6155<br>3343,gi 615<br>53350,gi 67<br>461090,gi 7<br>2534798 | 32,672.90  | 99.80%  | 2  | 3  | 3   | 0.02% | 11.10% | QLGSGL<br>LLVTGP<br>LSLNR   | 4.33 | 1,738.02 |
| Control | 6011 | PREDIC<br>TED:<br>filamin<br>A, alpha<br>(actin<br>binding<br>protein<br>280) | gi 1946802<br>54                                                                                 | 276,424.10 | 100.00% | 13 | 14 | 14  | 0.11% | 9.18%  | AFGPGL<br>QGSAG<br>SPAR     | 4.82 | 1,429.72 |
| Control | 6011 | PREDIC<br>TED:<br>filamin<br>A, alpha<br>(actin<br>binding<br>protein<br>280) | gi 1946802<br>54                                                                                 | 276,424.10 | 100.00% | 13 | 14 | 14  | 0.11% | 9.18%  | ANLPQS<br>FQVDTS<br>K       | 3.33 | 1,434.72 |

|         |      |                                                                               |                  |            |         |    |    |    |       |       |                                      |      |          |
|---------|------|-------------------------------------------------------------------------------|------------------|------------|---------|----|----|----|-------|-------|--------------------------------------|------|----------|
| Control | 6011 | PREDIC<br>TED:<br>filamin<br>A, alpha<br>(actin<br>binding<br>protein<br>280) | gi 1946802<br>54 | 276,424.10 | 100.00% | 13 | 14 | 14 | 0.11% | 9.18% | ASGPGL<br>NTTGVP<br>ASLPVEF<br>TIDAK | 3.58 | 2,342.22 |
| Control | 6011 | PREDIC<br>TED:<br>filamin<br>A, alpha<br>(actin<br>binding<br>protein<br>280) | gi 1946802<br>54 | 276,424.10 | 100.00% | 13 | 14 | 14 | 0.11% | 9.18% | AYGPGIE<br>PTGNMV<br>K               | 3.37 | 1,449.70 |
| Control | 6011 | PREDIC<br>TED:<br>filamin<br>A, alpha<br>(actin<br>binding<br>protein<br>280) | gi 1946802<br>54 | 276,424.10 | 100.00% | 13 | 14 | 14 | 0.11% | 9.18% | FADQHV<br>PGSPFSV<br>K               | 3.3  | 1,515.76 |
| Control | 6011 | PREDIC<br>TED:<br>filamin<br>A, alpha<br>(actin<br>binding<br>protein<br>280) | gi 1946802<br>54 | 276,424.10 | 100.00% | 13 | 14 | 14 | 0.11% | 9.18% | FNEEHIP<br>DSPFVV<br>PVASPS<br>GDAR  | 3.67 | 2,467.19 |
| Control | 6011 | PREDIC<br>TED:<br>filamin<br>A, alpha<br>(actin<br>binding<br>protein<br>280) | gi 1946802<br>54 | 276,424.10 | 100.00% | 13 | 14 | 14 | 0.11% | 9.18% | GAGTGG<br>LGLAVE<br>GPSEAK           | 4.24 | 1,570.81 |
| Control | 6011 | PREDIC<br>TED:<br>filamin<br>A, alpha<br>(actin<br>binding<br>protein<br>280) | gi 1946802<br>54 | 276,424.10 | 100.00% | 13 | 14 | 14 | 0.11% | 9.18% | IANLQT<br>DLSDDL<br>R                | 3.87 | 1,415.75 |
| Control | 6011 | PREDIC<br>TED:<br>filamin<br>A, alpha<br>(actin<br>binding<br>protein<br>280) | gi 1946802<br>54 | 276,424.10 | 100.00% | 13 | 14 | 14 | 0.11% | 9.18% | LIALLEV<br>LSQK                      | 2.5  | 1,226.77 |
| Control | 6011 | PREDIC<br>TED:<br>filamin<br>A, alpha<br>(actin<br>binding<br>protein<br>280) | gi 1946802<br>54 | 276,424.10 | 100.00% | 13 | 14 | 14 | 0.11% | 9.18% | SPFSVG<br>VSPSLDL<br>SK              | 3.75 | 1,519.80 |

|         |      |                                                            |                           |            |         |    |    |    |       |        |                                             |          |
|---------|------|------------------------------------------------------------|---------------------------|------------|---------|----|----|----|-------|--------|---------------------------------------------|----------|
| Control | 6011 | PREDICTED:<br>filamin A, alpha (actin binding protein 280) | gi 194680254              | 276,424.10 | 100.00% | 13 | 14 | 14 | 0.11% | 9.18%  | VAQPAIT 2.4<br>DNKDGT<br>VTVR               | 1,784.95 |
| Control | 6011 | PREDICTED:<br>filamin A, alpha (actin binding protein 280) | gi 194680254              | 276,424.10 | 100.00% | 13 | 14 | 14 | 0.11% | 9.18%  | VSGQGL 3.57<br>HEGHTF<br>EPAEFIID<br>TR     | 2,440.19 |
| Control | 6011 | PREDICTED:<br>filamin A, alpha (actin binding protein 280) | gi 194680254              | 276,424.10 | 100.00% | 13 | 14 | 14 | 0.11% | 9.18%  | VTAQGP 4.83<br>GLEPSG<br>NIANK              | 1,652.86 |
| Control | 6011 | PREDICTED:<br>filamin A, alpha (actin binding protein 280) | gi 194680254              | 276,424.10 | 100.00% | 13 | 14 | 14 | 0.11% | 9.18%  | YTPVQQ 4.87<br>GPVGIN<br>VTYGGD<br>AIPK     | 2,274.18 |
| Control | 6011 | NRAS protein                                               | gi 146186548,gi 148226664 | 21,211.30  | 100.00% | 4  | 4  | 4  | 0.03% | 24.90% | QGVEDA 3.18<br>FYTLVR                       | 1,397.71 |
| Control | 6011 | NRAS protein                                               | gi 146186548,gi 148226664 | 21,211.30  | 100.00% | 4  | 4  | 4  | 0.03% | 24.90% | SALTIQL 3.79<br>IQNHFV<br>DEYDPTI<br>EDSYR  | 2,967.44 |
| Control | 6011 | NRAS protein                                               | gi 146186548,gi 148226664 | 21,211.30  | 100.00% | 4  | 4  | 4  | 0.03% | 24.90% | SALTIQL 4.49<br>IQNHFV<br>DEYDPTI<br>EDSYRK | 3,095.53 |
| Control | 6011 | NRAS protein                                               | gi 146186548,gi 148226664 | 21,211.30  | 100.00% | 4  | 4  | 4  | 0.03% | 24.90% | SFADINL 2.35<br>YR                          | 1,098.56 |
| Control | 6011 | PI4K2A protein                                             | gi 151554868,gi 154152033 | 54,067.10  | 100.00% | 3  | 3  | 3  | 0.02% | 7.10%  | IYQGSSG 2.26<br>SYFVKD<br>PQGK              | 1,860.91 |
| Control | 6011 | PI4K2A protein                                             | gi 151554868,gi 154152033 | 54,067.10  | 100.00% | 3  | 3  | 3  | 0.02% | 7.10%  | LELNIVP 2.57<br>R                           | 953.5779 |
| Control | 6011 | PI4K2A protein                                             | gi 151554868,gi 154152033 | 54,067.10  | 100.00% | 3  | 3  | 3  | 0.02% | 7.10%  | LVVLDYI 2.55<br>IR                          | 1,103.68 |

|         |      |                                                                                                                                                                                        |                                                  |           |         |   |    |    |       |        |                                                 |      |          |
|---------|------|----------------------------------------------------------------------------------------------------------------------------------------------------------------------------------------|--------------------------------------------------|-----------|---------|---|----|----|-------|--------|-------------------------------------------------|------|----------|
| Control | 6011 | similar to Succinyl-CoA ligase [GDP-forming] beta-chain, mitochondrial precursor (Succinyl-CoA synthetase, beta chain) (SCS-betaG) (GTP-specific succinyl-CoA synthetase beta subunit) | gi 146231894,gi 75773452,gi 77736229,gi 91208175 | 46,647.10 | 99.80%  | 2 | 2  | 2  | 0.02% | 7.41%  | LEGTNV<br>HEAQNIL<br>SNSGLPI<br>TSAVDL<br>EDAAK | 3.59 | 3,206.62 |
| Control | 6011 | similar to Succinyl-CoA ligase [GDP-forming] beta-chain, mitochondrial precursor (Succinyl-CoA synthetase, beta chain) (SCS-betaG) (GTP-specific succinyl-CoA synthetase beta subunit) | gi 146231894,gi 75773452,gi 77736229,gi 91208175 | 46,647.10 | 99.80%  | 2 | 2  | 2  | 0.02% | 7.41%  | LEGTNV<br>HEAQNIL<br>SNSGLPI<br>TSAVDL<br>EDAAK | 4.61 | 3,334.71 |
| Control | 6011 | synaptosomal-associated protein 23                                                                                                                                                     | gi 115496868,gi 152941114,gi 83405332            | 23,209.50 | 100.00% | 8 | 10 | 18 | 0.14% | 37.00% | ANQVTD<br>ESLESTR                               | 4.15 | 1,449.68 |
| Control | 6011 | synaptosomal-associated protein 23                                                                                                                                                     | gi 115496868,gi 152941114,gi 83405332            | 23,209.50 | 100.00% | 8 | 10 | 18 | 0.14% | 37.00% | ANQVTD<br>ESLESTR<br>R                          | 2.62 | 1,605.78 |
| Control | 6011 | synaptosomal-associated protein 23                                                                                                                                                     | gi 115496868,gi 152941114,gi 83405332            | 23,209.50 | 100.00% | 8 | 10 | 18 | 0.14% | 37.00% | ILGLAIE<br>SQDAGI<br>K                          | 4.62 | 1,427.81 |

|         |      |                                                                              |                                        |           |         |   |    |    |       |        |                                      |      |          |
|---------|------|------------------------------------------------------------------------------|----------------------------------------|-----------|---------|---|----|----|-------|--------|--------------------------------------|------|----------|
| Control | 6011 | synaptosomal-associated protein 23                                           | gi 115496868,gi 152941114,gi 83405332  | 23,209.50 | 100.00% | 8 | 10 | 18 | 0.14% | 37.00% | NMALD<br>MGNEIE<br>AQNR              | 3.3  | 1,721.76 |
| Control | 6011 | synaptosomal-associated protein 23                                           | gi 115496868,gi 152941114,gi 83405332  | 23,209.50 | 100.00% | 8 | 10 | 18 | 0.14% | 37.00% | TITMLDE<br>QGEQLK                    | 3.67 | 1,521.75 |
| Control | 6011 | synaptosomal-associated protein 23                                           | gi 115496868,gi 152941114,gi 83405332  | 23,209.50 | 100.00% | 8 | 10 | 18 | 0.14% | 37.00% | TITMLDE<br>QGEQLK<br>R               | 2.72 | 1,677.85 |
| Control | 6011 | synaptosomal-associated protein 23                                           | gi 115496868,gi 152941114,gi 83405332  | 23,209.50 | 100.00% | 8 | 10 | 18 | 0.14% | 37.00% | VTNGQP<br>QQATAG<br>AASGGY<br>IK     | 5.42 | 1,918.96 |
| Control | 6011 | synaptosomal-associated protein 23                                           | gi 115496868,gi 152941114,gi 83405332  | 23,209.50 | 100.00% | 8 | 10 | 18 | 0.14% | 37.00% | VTNGQP<br>QQATAG<br>AASGGY<br>IKR    | 2.3  | 2,075.06 |
| Control | 6011 | LBR protein 2031                                                             | gi 151557087,gi 154152031              | 71,240.40 | 100.00% | 3 | 4  | 4  | 0.03% | 8.70%  | APQDEL<br>SPASSG<br>NAIYDF<br>IGR    | 5.1  | 2,355.13 |
| Control | 6011 | LBR protein 2031                                                             | gi 151557087,gi 154152031              | 71,240.40 | 100.00% | 3 | 4  | 4  | 0.03% | 8.70%  | FHLSQES<br>SYIPTQY<br>SLR            | 2.87 | 2,056.01 |
| Control | 6011 | LBR protein 2031                                                             | gi 151557087,gi 154152031              | 71,240.40 | 100.00% | 3 | 4  | 4  | 0.03% | 8.70%  | LTPLVL<br>KPFGENSI<br>NR             | 3.21 | 1,668.98 |
| Control | 6011 | Solute carrier family 1 (glutamate/neutral amino acid transporter), member 4 | gi 124828540,gi 126158903,gi 145566947 | 55,991.00 | 100.00% | 3 | 3  | 3  | 0.02% | 9.25%  | ETVDSFL<br>DLTR                      | 2.36 | 1,295.65 |
| Control | 6011 | Solute carrier family 1 (glutamate/neutral amino acid transporter), member 4 | gi 124828540,gi 126158903,gi 145566947 | 55,991.00 | 100.00% | 3 | 3  | 3  | 0.02% | 9.25%  | NLFPSNL<br>VVAAFR                    | 2.8  | 1,447.81 |
| Control | 6011 | Solute carrier family 1 (glutamate/neutral amino acid transporter), member 4 | gi 124828540,gi 126158903,gi 145566947 | 55,991.00 | 100.00% | 3 | 3  | 3  | 0.02% | 9.25%  | SEETSP<br>LVTHPN<br>PTGPAA<br>STPESK | 5.36 | 2,563.22 |



|         |      |                                                                                                                                       |                                       |            |         |   |   |   |       |       |                               |          |
|---------|------|---------------------------------------------------------------------------------------------------------------------------------------|---------------------------------------|------------|---------|---|---|---|-------|-------|-------------------------------|----------|
| Control | 6011 | radical S-adenosyl methionine domain containin                                                                                        | gi 114052066,gi 122142787,gi 88682896 | 41,655.10  | 99.80%  | 2 | 2 | 3 | 0.02% | 7.44% | FVISDEE 3.3<br>FEAFLD<br>R    | 1,716.81 |
| Control | 6011 | radical S-adenosyl methionine domain containin                                                                                        | gi 114052066,gi 122142787,gi 88682896 | 41,655.10  | 99.80%  | 2 | 2 | 3 | 0.02% | 7.44% | INFSGGE 3.38<br>PFLQDR        | 1,479.72 |
| Control | 6011 | RecName: Full=AT P-dependen t RNA helicase A; AltName: Full=Nuclear DNA helicase II; Short=N DH II; AltName: Full=DE AH box protein 9 | gi 2500541, 5,gi 2780666 5,gi 577739  | 141,929.30 | 100.00% | 4 | 4 | 4 | 0.03% | 6.60% | ELDALD 2.87<br>ANDELT<br>PLGR | 1,741.86 |
| Control | 6011 | RecName: Full=AT P-dependen t RNA helicase A; AltName: Full=Nuclear DNA helicase II; Short=N DH II; AltName: Full=DE AH box protein 9 | gi 2500541, 5,gi 2780666 5,gi 577739  | 141,929.30 | 100.00% | 4 | 4 | 4 | 0.03% | 6.60% | GMTLVT 3.48<br>PLQLLLF<br>ASK | 1,748.00 |

|         |      |                                                                                                                                                                                                |                                          |            |         |   |   |    |       |       |                                                                 |      |          |
|---------|------|------------------------------------------------------------------------------------------------------------------------------------------------------------------------------------------------|------------------------------------------|------------|---------|---|---|----|-------|-------|-----------------------------------------------------------------|------|----------|
| Control | 6011 | RecName<br>:<br>Full=AT<br>P-<br>dependen<br>t RNA<br>helicase<br>A;<br>AltName:<br>Full=Nuc<br>lear DNA<br>helicase<br>II;<br>Short=N<br>DH II;<br>AltName:<br>Full=DE<br>AH box<br>protein 9 | gi 2500541,<br>gi 2780666<br>5,gi 577739 | 141,929.30 | 100.00% | 4 | 4 | 4  | 0.03% | 6.60% | QPGIISQ<br>LDPVNE<br>R                                          | 2.95 | 1,565.83 |
| Control | 6011 | RecName<br>:<br>Full=AT<br>P-<br>dependen<br>t RNA<br>helicase<br>A;<br>AltName:<br>Full=Nuc<br>lear DNA<br>helicase<br>II;<br>Short=N<br>DH II;<br>AltName:<br>Full=DE<br>AH box<br>protein 9 | gi 2500541,<br>gi 2780666<br>5,gi 577739 | 141,929.30 | 100.00% | 4 | 4 | 4  | 0.03% | 6.60% | VNLSQD<br>LEHQLQ<br>NIVQEL<br>NLEIVPI<br>PEDPSVP<br>VALNLG<br>K | 2.89 | 4,315.32 |
| Control | 6011 | PREDIC<br>TED:<br>ubiquitin<br>C<br>isoform<br>12                                                                                                                                              | gi 7663871<br>6                          | 77,556.00  | 100.00% | 5 | 8 | 24 | 0.19% | 7.97% | AKIQDK<br>EGIPPDQ<br>QR                                         | 3.01 | 1,722.91 |
| Control | 6011 | PREDIC<br>TED:<br>ubiquitin<br>C<br>isoform<br>12                                                                                                                                              | gi 7663871<br>6                          | 77,556.00  | 100.00% | 5 | 8 | 24 | 0.19% | 7.97% | ESTLHL<br>VLR                                                   | 3.16 | 1,067.62 |
| Control | 6011 | PREDIC<br>TED:<br>ubiquitin<br>C<br>isoform<br>12                                                                                                                                              | gi 7663871<br>6                          | 77,556.00  | 100.00% | 5 | 8 | 24 | 0.19% | 7.97% | IQDKEGI<br>PPDQQR                                               | 4.61 | 1,523.78 |
| Control | 6011 | PREDIC<br>TED:<br>ubiquitin<br>C<br>isoform<br>12                                                                                                                                              | gi 7663871<br>6                          | 77,556.00  | 100.00% | 5 | 8 | 24 | 0.19% | 7.97% | QLEDGR<br>TLDYNI<br>QK                                          | 2.8  | 1,779.89 |

|         |      |                                                                                                                                               |                                                  |           |         |   |   |    |       |        |                              |      |          |
|---------|------|-----------------------------------------------------------------------------------------------------------------------------------------------|--------------------------------------------------|-----------|---------|---|---|----|-------|--------|------------------------------|------|----------|
| Control | 6011 | PREDICTED:<br>ubiquitin<br>C<br>isoform<br>12                                                                                                 | gi 7663871<br>6                                  | 77,556.00 | 100.00% | 5 | 8 | 24 | 0.19% | 7.97%  | TITLEVE<br>PSDTIEN<br>VK     | 4.79 | 1,787.93 |
| Control | 6011 | TPA: predicted<br>NADPH oxidase-5                                                                                                             | gi 1514275<br>72,gi 15537<br>2001                | 86,454.40 | 99.80%  | 2 | 3 | 3  | 0.02% | 3.71%  | AIGLQM<br>ALDLLA<br>K        | 3.71 | 1,372.79 |
| Control | 6011 | TPA: predicted<br>NADPH oxidase-5                                                                                                             | gi 1514275<br>72,gi 15537<br>2001                | 86,454.40 | 99.80%  | 2 | 3 | 3  | 0.02% | 3.71%  | MAALHI<br>VEVNLL<br>PSK      | 4.11 | 1,650.92 |
| Control | 6011 | RecName:<br>Full=Sma<br>ll nuclear<br>ribonucle<br>oprotein<br>Sm D1;<br>Short=S<br>m-D1;<br>AltName:<br>Full=snR<br>NP core<br>protein<br>D1 | gi 1098948<br>69,gi 73586<br>929,gi 7805<br>0059 | 13,263.90 | 99.80%  | 2 | 4 | 7  | 0.05% | 27.70% | NREPVQ<br>LETLSIR            | 3.67 | 1,554.86 |
| Control | 6011 | RecName:<br>Full=Sma<br>ll nuclear<br>ribonucle<br>oprotein<br>Sm D1;<br>Short=S<br>m-D1;<br>AltName:<br>Full=snR<br>NP core<br>protein<br>D1 | gi 1098948<br>69,gi 73586<br>929,gi 7805<br>0059 | 13,263.90 | 99.80%  | 2 | 4 | 7  | 0.05% | 27.70% | YFILPDS<br>LPLDTLL<br>VDVEPK | 4.75 | 2,287.25 |
| Control | 6011 | RecName:<br>Full=Synt<br>axin-4                                                                                                               | gi 1221400<br>85,gi 74356<br>383,gi 7805<br>0061 | 34,382.50 | 100.00% | 4 | 4 | 4  | 0.03% | 19.20% | AIEPQKE<br>EADENY<br>NSVNTR  | 4.32 | 2,207.02 |
| Control | 6011 | RecName:<br>Full=Synt<br>axin-4                                                                                                               | gi 1221400<br>85,gi 74356<br>383,gi 7805<br>0061 | 34,382.50 | 100.00% | 4 | 4 | 4  | 0.03% | 19.20% | NILSSAD<br>YVER              | 2.98 | 1,266.63 |
| Control | 6011 | RecName:<br>Full=Synt<br>axin-4                                                                                                               | gi 1221400<br>85,gi 74356<br>383,gi 7805<br>0061 | 34,382.50 | 100.00% | 4 | 4 | 4  | 0.03% | 19.20% | TQHGVL<br>SQQFVE<br>LINK     | 3.63 | 1,840.99 |
| Control | 6011 | RecName:<br>Full=Synt<br>axin-4                                                                                                               | gi 1221400<br>85,gi 74356<br>383,gi 7805<br>0061 | 34,382.50 | 100.00% | 4 | 4 | 4  | 0.03% | 19.20% | VALVVH<br>PGTAR              | 2.19 | 1,119.66 |

|         |      |                                                                               |            |            |         |    |    |    |       |        |                                     |      |          |
|---------|------|-------------------------------------------------------------------------------|------------|------------|---------|----|----|----|-------|--------|-------------------------------------|------|----------|
| Control | 6011 | PREDICTED: ATPase, Ca++ transporting, cardiac muscle, slow twitch 2 isoform 1 | gi 7663901 | 109,762.30 | 100.00% | 15 | 20 | 38 | 0.30% | 21.20% | AFTGRE<br>FDELSPS<br>AQR            | 2.78 | 1,810.87 |
| Control | 6011 | PREDICTED: ATPase, Ca++ transporting, cardiac muscle, slow twitch 2 isoform 1 | gi 7663901 | 109,762.30 | 100.00% | 15 | 20 | 38 | 0.30% | 21.20% | AKDIVP<br>GDIVEIA<br>VGDKVP<br>ADIR | 3.27 | 2,390.33 |
| Control | 6011 | PREDICTED: ATPase, Ca++ transporting, cardiac muscle, slow twitch 2 isoform 1 | gi 7663901 | 109,762.30 | 100.00% | 15 | 20 | 38 | 0.30% | 21.20% | AMGVV<br>VATGVN<br>TEIGK            | 4.88 | 1,561.83 |
| Control | 6011 | PREDICTED: ATPase, Ca++ transporting, cardiac muscle, slow twitch 2 isoform 1 | gi 7663901 | 109,762.30 | 100.00% | 15 | 20 | 38 | 0.30% | 21.20% | DIVPGDI<br>VEIAVG<br>DKVPAD<br>IR   | 4.12 | 2,191.20 |
| Control | 6011 | PREDICTED: ATPase, Ca++ transporting, cardiac muscle, slow twitch 2 isoform 1 | gi 7663901 | 109,762.30 | 100.00% | 15 | 20 | 38 | 0.30% | 21.20% | EEMNLE<br>DSANFIK                   | 3.08 | 1,555.69 |
| Control | 6011 | PREDICTED: ATPase, Ca++ transporting, cardiac muscle, slow twitch 2 isoform 1 | gi 7663901 | 109,762.30 | 100.00% | 15 | 20 | 38 | 0.30% | 21.20% | EFTLEFS<br>R                        | 1.79 | 1,028.50 |

|         |      |                                                                               |            |            |         |    |    |    |       |        |                            |      |          |
|---------|------|-------------------------------------------------------------------------------|------------|------------|---------|----|----|----|-------|--------|----------------------------|------|----------|
| Control | 6011 | PREDICTED: ATPase, Ca++ transporting, cardiac muscle, slow twitch 2 isoform 1 | gi 7663901 | 109,762.30 | 100.00% | 15 | 20 | 38 | 0.30% | 21.20% | ISLPVIL<br>MDETLK          | 4.27 | 1,487.84 |
| Control | 6011 | PREDICTED: ATPase, Ca++ transporting, cardiac muscle, slow twitch 2 isoform 1 | gi 7663901 | 109,762.30 | 100.00% | 15 | 20 | 38 | 0.30% | 21.20% | KSEIGIA<br>MGSHTA<br>VAK   | 5.59 | 1,535.81 |
| Control | 6011 | PREDICTED: ATPase, Ca++ transporting, cardiac muscle, slow twitch 2 isoform 1 | gi 7663901 | 109,762.30 | 100.00% | 15 | 20 | 38 | 0.30% | 21.20% | MNVFDT<br>ELKGLS<br>K      | 2.71 | 1,497.76 |
| Control | 6011 | PREDICTED: ATPase, Ca++ transporting, cardiac muscle, slow twitch 2 isoform 1 | gi 7663901 | 109,762.30 | 100.00% | 15 | 20 | 38 | 0.30% | 21.20% | NAENAIE<br>ALKEYE<br>PEMGK | 4.49 | 2,051.96 |
| Control | 6011 | PREDICTED: ATPase, Ca++ transporting, cardiac muscle, slow twitch 2 isoform 1 | gi 7663901 | 109,762.30 | 100.00% | 15 | 20 | 38 | 0.30% | 21.20% | NMLFSG<br>TNIAAG<br>K      | 3.35 | 1,339.67 |
| Control | 6011 | PREDICTED: ATPase, Ca++ transporting, cardiac muscle, slow twitch 2 isoform 1 | gi 7663901 | 109,762.30 | 100.00% | 15 | 20 | 38 | 0.30% | 21.20% | SEIGIAM<br>GSGTAV<br>AK    | 5.25 | 1,407.72 |

|         |      |                                                                                                                |            |            |         |    |    |    |       |        |                                               |      |          |
|---------|------|----------------------------------------------------------------------------------------------------------------|------------|------------|---------|----|----|----|-------|--------|-----------------------------------------------|------|----------|
| Control | 6011 | PREDICTED: ATPase, Ca++ transporting, cardiac muscle, slow twitch 2 isoform 1                                  | gi 7663901 | 109,762.30 | 100.00% | 15 | 20 | 38 | 0.30% | 21.20% | TASEMV<br>LADDNF<br>STIVA<br>AV<br>EEGR       | 4    | 2,441.15 |
| Control | 6011 | PREDICTED: ATPase, Ca++ transporting, cardiac muscle, slow twitch 2 isoform 1                                  | gi 7663901 | 109,762.30 | 100.00% | 15 | 20 | 38 | 0.30% | 21.20% | TVEEVL<br>GHFGVN<br>ESTGLSL<br>EQVKK          | 4.38 | 2,600.36 |
| Control | 6011 | PREDICTED: ATPase, Ca++ transporting, cardiac muscle, slow twitch 2 isoform 1                                  | gi 7663901 | 109,762.30 | 100.00% | 15 | 20 | 38 | 0.30% | 21.20% | VDQSILT<br>GESVSVI<br>K                       | 4.19 | 1,574.86 |
| Control | 6011 | PREDICTED: similar to solute carrier family 7 (cationic amino acid transporter, y+ system), member 2 isoform 2 | gi 1946791 | 71,681.50  | 100.00% | 3  | 5  | 6  | 0.05% | 6.08%  | DEEDDD<br>EDMYSD<br>NINAAT<br>EEK             | 5.55 | 2,463.91 |
| Control | 6011 | PREDICTED: similar to solute carrier family 7 (cationic amino acid transporter, y+ system), member 2 isoform 2 | gi 1946791 | 71,681.50  | 100.00% | 3  | 5  | 6  | 0.05% | 6.08%  | HSLEGN<br>PRDEED<br>DDEDMY<br>SDNINA<br>ATEEK | 6.04 | 3,354.35 |

|         |      |                                                                                                                   |                                                                                             |           |         |   |   |   |       |        |                                      |      |          |
|---------|------|-------------------------------------------------------------------------------------------------------------------|---------------------------------------------------------------------------------------------|-----------|---------|---|---|---|-------|--------|--------------------------------------|------|----------|
| Control | 6011 | PREDICTED:<br>similar to solute carrier family 7 (cationic amino acid transporter, y+ system), member 2 isoform 2 | gi 1946791<br>97                                                                            | 71,681.50 | 100.00% | 3 | 5 | 6 | 0.05% | 6.08%  | NLSLPFI<br>FHEK                      | 1.98 | 1,344.73 |
| Control | 6011 | ENDOD 1 protein                                                                                                   | gi 1544255<br>75,gi 15652<br>3150                                                           | 54,851.30 | 99.80%  | 2 | 2 | 3 | 0.02% | 4.60%  | FATLYST<br>QHR                       | 1.97 | 1,223.62 |
| Control | 6011 | ENDOD 1 protein                                                                                                   | gi 1544255<br>75,gi 15652<br>3150                                                           | 54,851.30 | 99.80%  | 2 | 2 | 3 | 0.02% | 4.60%  | ILEVVN<br>QVQDEE<br>R                | 4.35 | 1,570.81 |
| Control | 6011 | PREDICTED:<br>similar to L-lactate dehydrogenase A chain (LDH-A) (LDH muscle subunit) (LDH-M)                     | gi 1199200<br>80,gi 12604<br>5,gi 148878<br>492,gi 2175<br>88,gi 21759<br>2,gi 278065<br>59 | 36,579.90 | 99.80%  | 2 | 2 | 2 | 0.02% | 8.43%  | DQLIQNL<br>LKEEHV<br>PQNK            | 4.16 | 2,046.10 |
| Control | 6011 | PREDICTED:<br>similar to L-lactate dehydrogenase A chain (LDH-A) (LDH muscle subunit) (LDH-M)                     | gi 1199200<br>80,gi 12604<br>5,gi 148878<br>492,gi 2175<br>88,gi 21759<br>2,gi 278065<br>59 | 36,579.90 | 99.80%  | 2 | 2 | 2 | 0.02% | 8.43%  | QVVDSA<br>YEVK                       | 3.13 | 1,250.66 |
| Control | 6011 | Endoplasmic reticulum-golgi intermediate compartment (ERGIC) 1                                                    | gi 1113086<br>58,gi 11549<br>7382                                                           | 32,554.10 | 99.80%  | 2 | 2 | 2 | 0.02% | 11.40% | LSFGDTL<br>QVHNVH<br>GAFNAL<br>GGADR | 4.72 | 2,496.24 |
| Control | 6011 | Endoplasmic reticulum-golgi intermediate compartment (ERGIC) 1                                                    | gi 1113086<br>58,gi 11549<br>7382                                                           | 32,554.10 | 99.80%  | 2 | 2 | 2 | 0.02% | 11.40% | YDLSPIT<br>VK                        | 2.44 | 1,035.57 |

|         |      |                                                                                         |            |            |         |   |   |   |       |        |                                           |          |
|---------|------|-----------------------------------------------------------------------------------------|------------|------------|---------|---|---|---|-------|--------|-------------------------------------------|----------|
| Control | 6011 | PREDIC TED: 45<br>similar to hCG1980 844                                                | gi 1946749 | 298,419.90 | 100.00% | 3 | 3 | 4 | 0.03% | 1.21%  | LVPFLVE 2.37<br>LR                        | 1,085.67 |
| Control | 6011 | PREDIC TED: 45<br>similar to hCG1980 844                                                | gi 1946749 | 298,419.90 | 100.00% | 3 | 3 | 4 | 0.03% | 1.21%  | QLQPNE 3<br>EADYLG<br>VR                  | 1,631.80 |
| Control | 6011 | PREDIC TED: 45<br>similar to hCG1980 844                                                | gi 1946749 | 298,419.90 | 100.00% | 3 | 3 | 4 | 0.03% | 1.21%  | YLLTQE 2.87<br>LLR                        | 1,148.67 |
| Control | 6011 | 100 kDa coactivat or<br>gi 3052326<br>2,gi 454299<br>77,gi 60415<br>927,gi 7551<br>7981 | gi 3052326 | 101,972.50 | 100.00% | 3 | 3 | 3 | 0.02% | 6.70%  | EADGSE 3.45<br>TPEPFAA<br>EAK             | 1,648.73 |
| Control | 6011 | 100 kDa coactivat or<br>gi 3052326<br>2,gi 454299<br>77,gi 60415<br>927,gi 7551<br>7981 | gi 3052326 | 101,972.50 | 100.00% | 3 | 3 | 3 | 0.02% | 6.70%  | NLPGLV 3.82<br>QEGEPFS<br>EEATLFT<br>K    | 2,306.16 |
| Control | 6011 | 100 kDa coactivat or<br>gi 3052326<br>2,gi 454299<br>77,gi 60415<br>927,gi 7551<br>7981 | gi 3052326 | 101,972.50 | 100.00% | 3 | 3 | 3 | 0.02% | 6.70%  | VNVTVD 3.19<br>YIRPASP<br>ATDTVP<br>AFSER | 2,605.33 |
| Control | 6011 | PREDIC TED: 4<br>similar to karyophe rin beta 1 isoform 2                               | gi 7664462 | 97,210.30  | 100.00% | 4 | 5 | 5 | 0.04% | 7.31%  | GALQYL 3.32<br>VPILTQT<br>LTK             | 1,759.04 |
| Control | 6011 | PREDIC TED: 4<br>similar to karyophe rin beta 1 isoform 2                               | gi 7664462 | 97,210.30  | 100.00% | 4 | 5 | 5 | 0.04% | 7.31%  | LAATNA 5.09<br>LLNSLEF<br>TK              | 1,605.88 |
| Control | 6011 | PREDIC TED: 4<br>similar to karyophe rin beta 1 isoform 2                               | gi 7664462 | 97,210.30  | 100.00% | 4 | 5 | 5 | 0.04% | 7.31%  | LLETTD 2.93<br>RPDGHQ<br>NNLR             | 1,878.94 |
| Control | 6011 | PREDIC TED: 4<br>similar to karyophe rin beta 1 isoform 2                               | gi 7664462 | 97,210.30  | 100.00% | 4 | 5 | 5 | 0.04% | 7.31%  | LQQVLQ 3.84<br>MESHIQS<br>TSDR            | 2,015.98 |
| Control | 6011 | PREDIC TED: 65<br>similar to coiled-coil domain containin g 109A                        | gi 1199185 | 39,876.70  | 100.00% | 5 | 5 | 5 | 0.04% | 21.90% | DLLSHE 4.58<br>NAATLN<br>DVK              | 1,639.83 |
| Control | 6011 | PREDIC TED: 65<br>similar to coiled-coil domain containin g 109A                        | gi 1199185 | 39,876.70  | 100.00% | 5 | 5 | 5 | 0.04% | 21.90% | DRQYLL 3.27<br>FFHK                       | 1,366.73 |



|         |      |                                                                             |                                                  |            |         |   |   |   |       |        |                                    |      |          |
|---------|------|-----------------------------------------------------------------------------|--------------------------------------------------|------------|---------|---|---|---|-------|--------|------------------------------------|------|----------|
| Control | 6011 | PREDIC TED: 65<br>similar to coiled-coil domain containin g 109A            | gi 1199185                                       | 39,876.70  | 100.00% | 5 | 5 | 5 | 0.04% | 21.90% | LRDPLQ VHLPLR                      | 3.74 | 1,456.87 |
| Control | 6011 | PREDIC TED: 65<br>similar to coiled-coil domain containin g 109A            | gi 1199185                                       | 39,876.70  | 100.00% | 5 | 5 | 5 | 0.04% | 21.90% | VAASTGI DLLLLD DFKLVIN DLYYHV RPPK | 3.25 | 3,336.86 |
| Control | 6011 | PREDIC TED: 65<br>similar to coiled-coil domain containin g 109A            | gi 1199185                                       | 39,876.70  | 100.00% | 5 | 5 | 5 | 0.04% | 21.90% | VAIYSPD GVR                        | 2.26 | 1,076.57 |
| Control | 6011 | sorting and assembly machiner y compone nt 50 homolog                       | gi 1140510<br>51.gi 87578<br>317.gi 9576<br>9210 | 52,025.30  | 100.00% | 2 | 3 | 6 | 0.05% | 5.33%  | ETSYGL SFFKPQP GNFR                | 2.57 | 2,090.00 |
| Control | 6011 | sorting and assembly machiner y compone nt 50 homolog                       | gi 1140510<br>51.gi 87578<br>317.gi 9576<br>9210 | 52,025.30  | 100.00% | 2 | 3 | 6 | 0.05% | 5.33%  | LPNLLG R                           | 2.02 | 782.4884 |
| Control | 6011 | PREDIC TED: 74<br>similar to potassiu m-chloride cotranspo rter-1 isoform 2 | gi 1946750                                       | 120,598.40 | 100.00% | 3 | 3 | 3 | 0.02% | 2.76%  | DNIPFL R                           | 1.88 | 987.5623 |
| Control | 6011 | PREDIC TED: 74<br>similar to potassiu m-chloride cotranspo rter-1 isoform 2 | gi 1946750                                       | 120,598.40 | 100.00% | 3 | 3 | 3 | 0.02% | 2.76%  | ELVHIKP DQSNVR                     | 3.19 | 1,534.83 |
| Control | 6011 | PREDIC TED: 74<br>similar to potassiu m-chloride cotranspo rter-1 isoform 2 | gi 1946750                                       | 120,598.40 | 100.00% | 3 | 3 | 3 | 0.02% | 2.76%  | LLTFASQ LK                         | 2.23 | 1,020.61 |

|         |      |                                                |                                                                     |            |         |   |   |   |       |        |                           |      |          |
|---------|------|------------------------------------------------|---------------------------------------------------------------------|------------|---------|---|---|---|-------|--------|---------------------------|------|----------|
| Control | 6011 | PREDICTED:<br>similar to ephrin receptor EphA2 | gi 1198889                                                          | 107,900.50 | 100.00% | 5 | 5 | 5 | 0.04% | 6.67%  | EKDGEF SVLQLV GMLR        | 3.93 | 1,836.95 |
| Control | 6011 | PREDICTED:<br>similar to ephrin receptor EphA2 | gi 1198889                                                          | 107,900.50 | 100.00% | 5 | 5 | 5 | 0.04% | 6.67%  | FADIVSI LDK               | 3.54 | 1,120.63 |
| Control | 6011 | PREDICTED:<br>similar to ephrin receptor EphA2 | gi 1198889                                                          | 107,900.50 | 100.00% | 5 | 5 | 5 | 0.04% | 6.67%  | TYVDPH TYEDPN QAVLK       | 2.33 | 1,989.96 |
| Control | 6011 | PREDICTED:<br>similar to ephrin receptor EphA2 | gi 1198889                                                          | 107,900.50 | 100.00% | 5 | 5 | 5 | 0.04% | 6.67%  | VIGAGEF GEVYK             | 3.09 | 1,268.65 |
| Control | 6011 | PREDICTED:<br>similar to ephrin receptor EphA2 | gi 1198889                                                          | 107,900.50 | 100.00% | 5 | 5 | 5 | 0.04% | 6.67%  | YSEPLG LTR                | 2.72 | 1,132.60 |
| Control | 6011 | phospholipase D2                               | gi 1103318<br>71,gi 11530<br>4867,gi 115<br>496504,gi 1<br>16248582 | 105,751.20 | 99.80%  | 2 | 2 | 2 | 0.02% | 3.00%  | FAVASSP APEGDS R          | 3.51 | 1,390.66 |
| Control | 6011 | phospholipase D2                               | gi 1103318<br>71,gi 11530<br>4867,gi 115<br>496504,gi 1<br>16248582 | 105,751.20 | 99.80%  | 2 | 2 | 2 | 0.02% | 3.00%  | FLEDEY LLPSLGS K          | 2.84 | 1,610.83 |
| Control | 6011 | Progesterone receptor membrane component 1     | gi 1096593<br>85,gi 11549<br>5221,gi 116<br>248575,gi 7<br>689365   | 21,605.30  | 100.00% | 3 | 4 | 6 | 0.05% | 19.10% | GDQPAA SDSDDD EPPPLPR     | 3.07 | 1,978.86 |
| Control | 6011 | Progesterone receptor membrane component 1     | gi 1096593<br>85,gi 11549<br>5221,gi 116<br>248575,gi 7<br>689365   | 21,605.30  | 100.00% | 3 | 4 | 6 | 0.05% | 19.10% | IVRGDQ PAASDS DDDEPP PLPR | 4.18 | 2,347.12 |
| Control | 6011 | Progesterone receptor membrane component 1     | gi 1096593<br>85,gi 11549<br>5221,gi 116<br>248575,gi 7<br>689365   | 21,605.30  | 100.00% | 3 | 4 | 6 | 0.05% | 19.10% | KFYGPE GPYGVF AGR         | 3.91 | 1,644.82 |
| Control | 6011 | similar to ribosomal protein L27               | gi 2818971<br>7,gi 471170<br>99,gi 74268<br>027,gi 7740<br>4275     | 15,780.40  | 100.00% | 3 | 3 | 3 | 0.02% | 30.10% | NIDDGTS DRPYSH ALVAGI DR  | 3.72 | 2,272.10 |

|         |      |                                                                           |                                                                 |           |         |   |    |    |       |        |                                                |          |
|---------|------|---------------------------------------------------------------------------|-----------------------------------------------------------------|-----------|---------|---|----|----|-------|--------|------------------------------------------------|----------|
| Control | 6011 | similar to<br>ribosomal<br>protein<br>L27                                 | gi 2818971<br>7,gi 471170<br>99,gi 74268<br>027,gi 7740<br>4275 | 15,780.40 | 100.00% | 3 | 3  | 3  | 0.02% | 30.10% | VYNYNH 2.8<br>LMPTR                            | 1,423.68 |
| Control | 6011 | similar to<br>ribosomal<br>protein<br>L27                                 | gi 2818971<br>7,gi 471170<br>99,gi 74268<br>027,gi 7740<br>4275 | 15,780.40 | 100.00% | 3 | 3  | 3  | 0.02% | 30.10% | YSVDIPL 2.76<br>DK                             | 1,049.55 |
| Control | 6011 | PREDIC<br>TED:<br>heat<br>shock<br>60kDa<br>protein 1<br>(chaperon<br>in) | gi 1198882<br>28                                                | 75,015.00 | 100.00% | 8 | 11 | 13 | 0.10% | 16.90% | GVMLAV 2.04<br>DAVIAEL<br>KK                   | 1,572.90 |
| Control | 6011 | PREDIC<br>TED:<br>heat<br>shock<br>60kDa<br>protein 1<br>(chaperon<br>in) | gi 1198882<br>28                                                | 75,015.00 | 100.00% | 8 | 11 | 13 | 0.10% | 16.90% | GYISPYF 3.07<br>INTSK                          | 1,389.70 |
| Control | 6011 | PREDIC<br>TED:<br>heat<br>shock<br>60kDa<br>protein 1<br>(chaperon<br>in) | gi 1198882<br>28                                                | 75,015.00 | 100.00% | 8 | 11 | 13 | 0.10% | 16.90% | IMQSSE 3.2<br>VGYDA<br>MLGDFV<br>NMVEK         | 2,566.15 |
| Control | 6011 | PREDIC<br>TED:<br>heat<br>shock<br>60kDa<br>protein 1<br>(chaperon<br>in) | gi 1198882<br>28                                                | 75,015.00 | 100.00% | 8 | 11 | 13 | 0.10% | 16.90% | ISSVQSI 3.89<br>VPALeia<br>NAHR                | 1,905.06 |
| Control | 6011 | PREDIC<br>TED:<br>heat<br>shock<br>60kDa<br>protein 1<br>(chaperon<br>in) | gi 1198882<br>28                                                | 75,015.00 | 100.00% | 8 | 11 | 13 | 0.10% | 16.90% | KISSVQS 4.37<br>IVPALEI<br>ANAHR               | 2,033.15 |
| Control | 6011 | PREDIC<br>TED:<br>heat<br>shock<br>60kDa<br>protein 1<br>(chaperon<br>in) | gi 1198882<br>28                                                | 75,015.00 | 100.00% | 8 | 11 | 13 | 0.10% | 16.90% | LVQDVA 4.89<br>NNTNEE<br>AGDGTT<br>TATVLA<br>R | 2,560.25 |
| Control | 6011 | PREDIC<br>TED:<br>heat<br>shock<br>60kDa<br>protein 1<br>(chaperon<br>in) | gi 1198882<br>28                                                | 75,015.00 | 100.00% | 8 | 11 | 13 | 0.10% | 16.90% | TLNDEL 2.33<br>EIIEGMK<br>FDR                  | 1,938.95 |

|         |      |                                                                |                                                |            |         |    |    |    |       |        |                                             |      |          |
|---------|------|----------------------------------------------------------------|------------------------------------------------|------------|---------|----|----|----|-------|--------|---------------------------------------------|------|----------|
| Control | 6011 | PREDICTED:<br>heat shock<br>60kDa<br>protein 1<br>(chaperonin) | gi 119888228                                   | 75,015.00  | 100.00% | 8  | 11 | 13 | 0.10% | 16.90% | VGLQVV<br>AVK                               | 3.2  | 912.5877 |
| Control | 6011 | CYB5R3<br>protein                                              | gi 148877441.gi 157151718.gi 162941.gi 1709233 | 33,973.70  | 100.00% | 11 | 18 | 37 | 0.29% | 45.30% | DILLRPE<br>LEELR                            | 2.18 | 1,495.85 |
| Control | 6011 | CYB5R3<br>protein                                              | gi 148877441.gi 157151718.gi 162941.gi 1709233 | 33,973.70  | 100.00% | 11 | 18 | 37 | 0.29% | 45.30% | DILLRPE<br>LEELRN<br>EHSAR                  | 3.53 | 2,190.16 |
| Control | 6011 | CYB5R3<br>protein                                              | gi 148877441.gi 157151718.gi 162941.gi 1709233 | 33,973.70  | 100.00% | 11 | 18 | 37 | 0.29% | 45.30% | FALPSPE<br>HILGLPV<br>GQHIYLS<br>AR         | 3.76 | 2,515.38 |
| Control | 6011 | CYB5R3<br>protein                                              | gi 148877441.gi 157151718.gi 162941.gi 1709233 | 33,973.70  | 100.00% | 11 | 18 | 37 | 0.29% | 45.30% | GPNGLL<br>VYQGK                             | 3.96 | 1,145.63 |
| Control | 6011 | CYB5R3<br>protein                                              | gi 148877441.gi 157151718.gi 162941.gi 1709233 | 33,973.70  | 100.00% | 11 | 18 | 37 | 0.29% | 45.30% | IDGNLVI<br>RPYTPV<br>SSDDDK<br>GFVDLVI<br>K | 5.4  | 2,975.57 |
| Control | 6011 | CYB5R3<br>protein                                              | gi 148877441.gi 157151718.gi 162941.gi 1709233 | 33,973.70  | 100.00% | 11 | 18 | 37 | 0.29% | 45.30% | IGDTIEF<br>R                                | 2.99 | 950.4943 |
| Control | 6011 | CYB5R3<br>protein                                              | gi 148877441.gi 157151718.gi 162941.gi 1709233 | 33,973.70  | 100.00% | 11 | 18 | 37 | 0.29% | 45.30% | LIDKEVI<br>SHDTR                            | 3.12 | 1,425.77 |
| Control | 6011 | CYB5R3<br>protein                                              | gi 148877441.gi 157151718.gi 162941.gi 1709233 | 33,973.70  | 100.00% | 11 | 18 | 37 | 0.29% | 45.30% | LIDKEVI<br>SHDTRR                           | 2.61 | 1,581.87 |
| Control | 6011 | CYB5R3<br>protein                                              | gi 148877441.gi 157151718.gi 162941.gi 1709233 | 33,973.70  | 100.00% | 11 | 18 | 37 | 0.29% | 45.30% | STPAITL<br>ENPDIK                           | 3.87 | 1,398.75 |
| Control | 6011 | CYB5R3<br>protein                                              | gi 148877441.gi 157151718.gi 162941.gi 1709233 | 33,973.70  | 100.00% | 11 | 18 | 37 | 0.29% | 45.30% | STPAITL<br>ENPDIKY<br>PLR                   | 4.66 | 1,928.05 |
| Control | 6011 | CYB5R3<br>protein                                              | gi 148877441.gi 157151718.gi 162941.gi 1709233 | 33,973.70  | 100.00% | 11 | 18 | 37 | 0.29% | 45.30% | SVGMA<br>GGTGITP<br>MLQVIR                  | 6.02 | 1,917.03 |
| Control | 6011 | PREDICTED:<br>heparan<br>sulfate<br>proteoglycan 2             | gi 119888979                                   | 467,987.40 | 100.00% | 10 | 10 | 10 | 0.08% | 3.83%  | EHLMA<br>LADLDE<br>LLVR                     | 3.12 | 1,867.00 |

|         |      |                                            |                                        |            |         |    |    |    |       |        |                             |      |          |
|---------|------|--------------------------------------------|----------------------------------------|------------|---------|----|----|----|-------|--------|-----------------------------|------|----------|
| Control | 6011 | PREDIC TED: heparan sulfate proteoglycan 2 | gi 119888979                           | 467,987.40 | 100.00% | 10 | 10 | 10 | 0.08% | 3.83%  | GTLEPV QRPDVV LVGAGHR       | 3.81 | 2,000.10 |
| Control | 6011 | PREDIC TED: heparan sulfate proteoglycan 2 | gi 119888979                           | 467,987.40 | 100.00% | 10 | 10 | 10 | 0.08% | 3.83%  | HPTPLAL GQFHTV TLLR         | 3.45 | 1,901.08 |
| Control | 6011 | PREDIC TED: heparan sulfate proteoglycan 2 | gi 119888979                           | 467,987.40 | 100.00% | 10 | 10 | 10 | 0.08% | 3.83%  | IPGDQV VSVVFIK              | 3.16 | 1,400.81 |
| Control | 6011 | PREDIC TED: heparan sulfate proteoglycan 2 | gi 119888979                           | 467,987.40 | 100.00% | 10 | 10 | 10 | 0.08% | 3.83%  | IQVVVLP GATTPP VR           | 3.94 | 1,546.93 |
| Control | 6011 | PREDIC TED: heparan sulfate proteoglycan 2 | gi 119888979                           | 467,987.40 | 100.00% | 10 | 10 | 10 | 0.08% | 3.83%  | LDVEFK PLAPDG VLLFSG GK     | 3.6  | 2,102.15 |
| Control | 6011 | PREDIC TED: heparan sulfate proteoglycan 2 | gi 119888979                           | 467,987.40 | 100.00% | 10 | 10 | 10 | 0.08% | 3.83%  | LRPGIVQ SGGIVR              | 2.89 | 1,351.82 |
| Control | 6011 | PREDIC TED: heparan sulfate proteoglycan 2 | gi 119888979                           | 467,987.40 | 100.00% | 10 | 10 | 10 | 0.08% | 3.83%  | LRSPVISI DPPSSTV QQGQDA SFK | 5.85 | 2,557.33 |
| Control | 6011 | PREDIC TED: heparan sulfate proteoglycan 2 | gi 119888979                           | 467,987.40 | 100.00% | 10 | 10 | 10 | 0.08% | 3.83%  | SVVPQG GPHSLR               | 2.16 | 1,233.67 |
| Control | 6011 | PREDIC TED: heparan sulfate proteoglycan 2 | gi 119888979                           | 467,987.40 | 100.00% | 10 | 10 | 10 | 0.08% | 3.83%  | VVPYFT QTPYSFL PLPTIK       | 2.45 | 2,211.21 |
| Control | 6011 | PTBP1 protein                              | gi 158454983                           | 47,010.90  | 100.00% | 2  | 2  | 2  | 0.02% | 8.97%  | KLPGDV TEGEVIS LGLPFG K     | 2.86 | 2,056.13 |
| Control | 6011 | PTBP1 protein                              | gi 158454983                           | 47,010.90  | 100.00% | 2  | 2  | 2  | 0.02% | 8.97%  | NNQFQA LLQYAD PVSAQH AK     | 3.4  | 2,243.12 |
| Control | 6011 | Transmembrane protein 49                   | gi 111307060,gi 115496266,gi 122133514 | 46,165.40  | 100.00% | 3  | 3  | 7  | 0.05% | 13.50% | EQYNGN FTDPSV NEK           | 2.88 | 1,828.80 |
| Control | 6011 | Transmembrane protein 49                   | gi 111307060,gi 115496266,gi 122133514 | 46,165.40  | 100.00% | 3  | 3  | 7  | 0.05% | 13.50% | LAVQNL VQK                  | 2.99 | 1,012.62 |

|         |      |                                  |                                                 |            |         |   |   |   |       |        |                                                |      |          |
|---------|------|----------------------------------|-------------------------------------------------|------------|---------|---|---|---|-------|--------|------------------------------------------------|------|----------|
| Control | 6011 | Transmembrane protein 49         | gi 111307060,gi 115496266,gi 122133514          | 46,165.40  | 100.00% | 3 | 3 | 7 | 0.05% | 13.50% | LSGAEP<br>DDEEYQ<br>EFEEML<br>EHAETA<br>QDFASR | 4.47 | 3,489.46 |
| Control | 6011 | KRT5 protein                     | gi 146186887,gi 56710317                        | 62,920.60  | 100.00% | 3 | 4 | 9 | 0.07% | 5.16%  | FASFIDK<br>VR                                  | 1.87 | 1,082.60 |
| Control | 6011 | KRT5 protein                     | gi 146186887,gi 56710317                        | 62,920.60  | 100.00% | 3 | 4 | 9 | 0.07% | 5.16%  | NKYEDE<br>INKR                                 | 2.43 | 1,308.65 |
| Control | 6011 | KRT5 protein                     | gi 146186887,gi 56710317                        | 62,920.60  | 100.00% | 3 | 4 | 9 | 0.07% | 5.16%  | SLDLDLSII<br>AEVK                              | 5.04 | 1,302.72 |
| Control | 6011 | PREDICTED: similar to CG2943-PA  | gi 119888913                                    | 115,925.80 | 100.00% | 4 | 5 | 6 | 0.05% | 6.67%  | ALVQTE<br>DHLLFL<br>QQLAGR                     | 3.7  | 2,165.21 |
| Control | 6011 | PREDICTED: similar to CG2943-PA  | gi 119888913                                    | 115,925.80 | 100.00% | 4 | 5 | 6 | 0.05% | 6.67%  | HLLVGL<br>PSGAILS<br>LPK                       | 4.84 | 1,614.99 |
| Control | 6011 | PREDICTED: similar to CG2943-PA  | gi 119888913                                    | 115,925.80 | 100.00% | 4 | 5 | 6 | 0.05% | 6.67%  | NFPQAA<br>LVSFATT<br>GEK                       | 4.58 | 1,680.86 |
| Control | 6011 | PREDICTED: similar to CG2943-PA  | gi 119888913                                    | 115,925.80 | 100.00% | 4 | 5 | 6 | 0.05% | 6.67%  | RPVLQS<br>LLLPIMD<br>QDYAK                     | 3.57 | 2,116.15 |
| Control | 6011 | chloride intracellular channel 1 | gi 59858371,gi 62751970,gi 74268283,gi 75040226 | 26,974.50  | 99.80%  | 2 | 2 | 2 | 0.02% | 11.20% | GFSIPDV<br>FR                                  | 2.11 | 1,037.54 |
| Control | 6011 | chloride intracellular channel 1 | gi 59858371,gi 62751970,gi 74268283,gi 75040226 | 26,974.50  | 99.80%  | 2 | 2 | 2 | 0.02% | 11.20% | LAALNP<br>ESNTAG<br>LDIFAK                     | 2.88 | 1,844.98 |
| Control | 6011 | SFXN3 protein                    | gi 151554123,gi 156120541,gi 206558262          | 35,690.00  | 100.00% | 4 | 4 | 4 | 0.03% | 16.80% | AQIQEQ<br>NPSIEVV<br>YYNK                      | 4.52 | 2,023.01 |
| Control | 6011 | SFXN3 protein                    | gi 151554123,gi 156120541,gi 206558262          | 35,690.00  | 100.00% | 4 | 4 | 4 | 0.03% | 16.80% | ELQVGIP<br>VTNEQG<br>QR                        | 3.12 | 1,667.87 |
| Control | 6011 | SFXN3 protein                    | gi 151554123,gi 156120541,gi 206558262          | 35,690.00  | 100.00% | 4 | 4 | 4 | 0.03% | 16.80% | HFFTVT<br>DPR                                  | 2.43 | 1,119.56 |
| Control | 6011 | SFXN3 protein                    | gi 151554123,gi 156120541,gi 206558262          | 35,690.00  | 100.00% | 4 | 4 | 4 | 0.03% | 16.80% | NLLLSG<br>AQLEAS<br>R                          | 4.38 | 1,371.76 |

|         |      |                                                                                                                  |                                                                                                                                                                          |           |         |   |   |   |       |        |                                                  |          |
|---------|------|------------------------------------------------------------------------------------------------------------------|--------------------------------------------------------------------------------------------------------------------------------------------------------------------------|-----------|---------|---|---|---|-------|--------|--------------------------------------------------|----------|
| Control | 6011 | RecName<br>:<br>Full=Mic<br>rosomal<br>glutathio<br>ne S-<br>transferas<br>e 3;<br>Short=Mic<br>rosomal<br>GST-3 | gi 1102790<br>49,gi 74353<br>862,gi 7804<br>2542                                                                                                                         | 16,865.90 | 99.80%  | 2 | 2 | 5 | 0.04% | 25.00% | AHQNTL 2.92<br>EVYPPFL<br>FFLAVG<br>GVYHPR       | 2,872.49 |
| Control | 6011 | RecName<br>:<br>Full=Mic<br>rosomal<br>glutathio<br>ne S-<br>transferas<br>e 3;<br>Short=Mic<br>rosomal<br>GST-3 | gi 1102790<br>49,gi 74353<br>862,gi 7804<br>2542                                                                                                                         | 16,865.90 | 99.80%  | 2 | 2 | 5 | 0.04% | 25.00% | VLAYAG 4.05<br>YYTGEP<br>R                       | 1,551.75 |
| Control | 6011 | 2',5'-<br>oligoaden<br>ylate<br>synthetas<br>e 1,<br>40/46kDa                                                    | gi 1584549<br>90,gi 37953<br>332,gi 9496<br>7004                                                                                                                         | 45,118.40 | 100.00% | 3 | 4 | 9 | 0.07% | 11.10% | LNQAVE 6.18<br>FDVLPA<br>FDALGQ<br>LTK           | 2,289.21 |
| Control | 6011 | 2',5'-<br>oligoaden<br>ylate<br>synthetas<br>e 1,<br>40/46kDa                                                    | gi 1584549<br>90,gi 37953<br>332,gi 9496<br>7004                                                                                                                         | 45,118.40 | 100.00% | 3 | 4 | 9 | 0.07% | 11.10% | PVILDPA 4.29<br>DPTGNV<br>AGK                    | 1,563.84 |
| Control | 6011 | 2',5'-<br>oligoaden<br>ylate<br>synthetas<br>e 1,<br>40/46kDa                                                    | gi 1584549<br>90,gi 37953<br>332,gi 9496<br>7004                                                                                                                         | 45,118.40 | 100.00% | 3 | 4 | 9 | 0.07% | 11.10% | QLAKPR 2.98<br>PVILDPA<br>DPTGNV<br>AGK          | 2,257.27 |
| Control | 6011 | RecName<br>:<br>Full=Met<br>axin-1                                                                               | gi 1221370<br>86,gi 83638<br>781,gi 9496<br>7008                                                                                                                         | 35,657.20 | 100.00% | 3 | 3 | 4 | 0.03% | 19.60% | FFFGDAP 4.46<br>ASLDAF<br>VFSYLA<br>LLQQAK       | 2,766.42 |
| Control | 6011 | RecName<br>:<br>Full=Met<br>axin-1                                                                               | gi 1221370<br>86,gi 83638<br>781,gi 9496<br>7008                                                                                                                         | 35,657.20 | 100.00% | 3 | 3 | 4 | 0.03% | 19.60% | NQILTVL 4.89<br>AGLAAM<br>AGYALL<br>SGIVSIQ<br>R | 2,759.55 |
| Control | 6011 | RecName<br>:<br>Full=Met<br>axin-1                                                                               | gi 1221370<br>86,gi 83638<br>781,gi 9496<br>7008                                                                                                                         | 35,657.20 | 100.00% | 3 | 3 | 4 | 0.03% | 19.60% | YNADYD 3.37<br>LSAR                              | 1,187.53 |
| Control | 6011 | ARP3<br>actin-<br>related<br>protein 3<br>homolog<br>(yeast)                                                     | gi 1153048<br>56,gi 14874<br>4289,gi 149<br>243031,gi 1<br>49243038,gi <br>14924304<br>5,gi 149243<br>052,gi 1492<br>43059,gi 21<br>7422,gi 278<br>06335,gi 47<br>117646 | 47,353.80 | 100.00% | 3 | 3 | 4 | 0.03% | 10.50% | AEPEDH 2.94<br>YFLLTEP<br>PLNTPE<br>NR           | 2,482.19 |

|         |      |                                              |                                                                                                                             |           |         |    |    |    |       |        |                          |      |          |
|---------|------|----------------------------------------------|-----------------------------------------------------------------------------------------------------------------------------|-----------|---------|----|----|----|-------|--------|--------------------------|------|----------|
| Control | 6011 | ARP3 actin-related protein 3 homolog (yeast) | gi 115304856,gi 148744289,gi 149243031,gi 149243038,gi 149243045,gi 149243052,gi 149243059,gi 17422,gi 27806335,gi 47117646 | 47,353.80 | 100.00% | 3  | 3  | 4  | 0.03% | 10.50% | DITYFIQ QLLR             | 2.46 | 1,409.78 |
| Control | 6011 | ARP3 actin-related protein 3 homolog (yeast) | gi 115304856,gi 148744289,gi 149243031,gi 149243038,gi 149243045,gi 149243052,gi 149243059,gi 17422,gi 27806335,gi 47117646 | 47,353.80 | 100.00% | 3  | 3  | 4  | 0.03% | 10.50% | NIVLSGG STMFR            | 3.92 | 1,297.66 |
| Control | 6011 | KIAA1715                                     | gi 111304578,gi 115496264                                                                                                   | 48,163.90 | 99.80%  | 2  | 2  | 2  | 0.02% | 6.06%  | IVEYLV GDGPQNR           | 3.86 | 1,459.75 |
| Control | 6011 | KIAA1715                                     | gi 111304578,gi 115496264                                                                                                   | 48,163.90 | 99.80%  | 2  | 2  | 2  | 0.02% | 6.06%  | TVTPAL SSNVLP R          | 2.83 | 1,354.77 |
| Control | 6011 | RecName : Full=GT P-binding protein SAR1a    | gi 115311863,gi 74354052,gi 77735989                                                                                        | 22,391.90 | 99.80%  | 2  | 2  | 2  | 0.02% | 11.10% | LVFLGL DNAGK             | 3.08 | 1,146.65 |
| Control | 6011 | RecName : Full=GT P-binding protein SAR1a    | gi 115311863,gi 74354052,gi 77735989                                                                                        | 22,391.90 | 99.80%  | 2  | 2  | 2  | 0.02% | 11.10% | TLLHMK LKDDR             | 2.08 | 1,358.71 |
| Control | 6011 | Actin, gamma 1                               | gi 151554360,gi 74354242,gi 75812932                                                                                        | 41,775.90 | 100.00% | 14 | 23 | 65 | 0.51% | 41.60% | AVFPSIV GR               | 2.37 | 945.5516 |
| Control | 6011 | Actin, gamma 1                               | gi 151554360,gi 74354242,gi 75812932                                                                                        | 41,775.90 | 100.00% | 14 | 23 | 65 | 0.51% | 41.60% | AVFPSIV GRPR             | 3.1  | 1,198.71 |
| Control | 6011 | Actin, gamma 1                               | gi 151554360,gi 74354242,gi 75812932                                                                                        | 41,775.90 | 100.00% | 14 | 23 | 65 | 0.51% | 41.60% | DLTDYL MK                | 1.87 | 1,014.48 |
| Control | 6011 | Actin, gamma 1                               | gi 151554360,gi 74354242,gi 75812932                                                                                        | 41,775.90 | 100.00% | 14 | 23 | 65 | 0.51% | 41.60% | DLYANT VLSGGT TMYPGI ADR | 4.58 | 2,231.07 |
| Control | 6011 | Actin, gamma 1                               | gi 151554360,gi 74354242,gi 75812932                                                                                        | 41,775.90 | 100.00% | 14 | 23 | 65 | 0.51% | 41.60% | EITALAP STMK             | 3.03 | 1,161.62 |
| Control | 6011 | Actin, gamma 1                               | gi 151554360,gi 74354242,gi 75812932                                                                                        | 41,775.90 | 100.00% | 14 | 23 | 65 | 0.51% | 41.60% | GYSFTT TAER              | 3.43 | 1,132.53 |



|         |      |                                                        |                                                                 |           |         |    |    |    |       |        |                                                     |          |
|---------|------|--------------------------------------------------------|-----------------------------------------------------------------|-----------|---------|----|----|----|-------|--------|-----------------------------------------------------|----------|
| Control | 6011 | Actin,<br>gamma 1                                      | gi 1515543<br>60,gi 74354<br>242,gi 7581<br>2932                | 41,775.90 | 100.00% | 14 | 23 | 65 | 0.51% | 41.60% | IKIAPPE 2.5<br>RK                                   | 1,164.75 |
| Control | 6011 | Actin,<br>gamma 1                                      | gi 1515543<br>60,gi 74354<br>242,gi 7581<br>2932                | 41,775.90 | 100.00% | 14 | 23 | 65 | 0.51% | 41.60% | KDLYAN 4.74<br>TVLSGG<br>TTMYPG<br>IADR             | 2,359.16 |
| Control | 6011 | Actin,<br>gamma 1                                      | gi 1515543<br>60,gi 74354<br>242,gi 7581<br>2932                | 41,775.90 | 100.00% | 14 | 23 | 65 | 0.51% | 41.60% | LDLAGR 2.75<br>DLTDYL<br>MK                         | 1,639.84 |
| Control | 6011 | Actin,<br>gamma 1                                      | gi 1515543<br>60,gi 74354<br>242,gi 7581<br>2932                | 41,775.90 | 100.00% | 14 | 23 | 65 | 0.51% | 41.60% | QEYDES 2.59<br>GPSIVHR                              | 1,516.70 |
| Control | 6011 | Actin,<br>gamma 1                                      | gi 1515543<br>60,gi 74354<br>242,gi 7581<br>2932                | 41,775.90 | 100.00% | 14 | 23 | 65 | 0.51% | 41.60% | QEYDES 3<br>GPSIVHR<br>K                            | 1,644.80 |
| Control | 6011 | Actin,<br>gamma 1                                      | gi 1515543<br>60,gi 74354<br>242,gi 7581<br>2932                | 41,775.90 | 100.00% | 14 | 23 | 65 | 0.51% | 41.60% | SYELPD 4.51<br>GQVITIG<br>NER                       | 1,790.89 |
| Control | 6011 | Actin,<br>gamma 1                                      | gi 1515543<br>60,gi 74354<br>242,gi 7581<br>2932                | 41,775.90 | 100.00% | 14 | 23 | 65 | 0.51% | 41.60% | TTGIVM 6.32<br>DSGDGV<br>THTVPIY<br>EGYALP<br>HAILR | 3,183.61 |
| Control | 6011 | Actin,<br>gamma 1                                      | gi 1515543<br>60,gi 74354<br>242,gi 7581<br>2932                | 41,775.90 | 100.00% | 14 | 23 | 65 | 0.51% | 41.60% | VAPEEH 4.43<br>PVLTE<br>APLNPK                      | 1,954.06 |
| Control | 6011 | RecName<br>:<br>Full=40S<br>ribosomal<br>protein<br>S2 | gi 1089358<br>89,gi 22935<br>79,gi 74267<br>604,gi 7581<br>2930 | 31,218.00 | 100.00% | 3  | 3  | 3  | 0.02% | 12.30% | GTGIVSA 2.54<br>PVPK                                | 1,025.60 |
| Control | 6011 | RecName<br>:<br>Full=40S<br>ribosomal<br>protein<br>S2 | gi 1089358<br>89,gi 22935<br>79,gi 74267<br>604,gi 7581<br>2930 | 31,218.00 | 100.00% | 3  | 3  | 3  | 0.02% | 12.30% | SLEEIYL 2.14<br>FSLPIK                              | 1,551.87 |
| Control | 6011 | RecName<br>:<br>Full=40S<br>ribosomal<br>protein<br>S2 | gi 1089358<br>89,gi 22935<br>79,gi 74267<br>604,gi 7581<br>2930 | 31,218.00 | 100.00% | 3  | 3  | 3  | 0.02% | 12.30% | SPYQEFT 2.76<br>DHLVK                               | 1,463.72 |

|         |      |                                                                                                                                                                                                                                                                          |           |         |    |    |    |       |        |                                       |          |
|---------|------|--------------------------------------------------------------------------------------------------------------------------------------------------------------------------------------------------------------------------------------------------------------------------|-----------|---------|----|----|----|-------|--------|---------------------------------------|----------|
| Control | 6011 | RecName gi 1098928<br>: 83,gi 11629<br>Full=Pept 2141,gi 606<br>idyl- 50282,gi 73<br>tRNA 587109,gi 7<br>hydrolase 7735985<br>2,<br>mitochon<br>drial;<br>Short=PT<br>H 2;<br>AltName:<br>Full=Bcl-<br>2<br>inhibitor<br>of<br>transcript<br>ion;<br>Flags:<br>Precursor | 19,272.70 | 100.00% | 3  | 3  | 3  | 0.02% | 27.90% | APDEET 4.1<br>LVELLT<br>HAK           | 1,665.87 |
| Control | 6011 | RecName gi 1098928<br>: 83,gi 11629<br>Full=Pept 2141,gi 606<br>idyl- 50282,gi 73<br>tRNA 587109,gi 7<br>hydrolase 7735985<br>2,<br>mitochon<br>drial;<br>Short=PT<br>H 2;<br>AltName:<br>Full=Bcl-<br>2<br>inhibitor<br>of<br>transcript<br>ion;<br>Flags:<br>Precursor | 19,272.70 | 100.00% | 3  | 3  | 3  | 0.02% | 27.90% | TVLGIGP 1.8<br>GPADLID<br>KVTGHL<br>K | 2,101.20 |
| Control | 6011 | RecName gi 1098928<br>: 83,gi 11629<br>Full=Pept 2141,gi 606<br>idyl- 50282,gi 73<br>tRNA 587109,gi 7<br>hydrolase 7735985<br>2,<br>mitochon<br>drial;<br>Short=PT<br>H 2;<br>AltName:<br>Full=Bcl-<br>2<br>inhibitor<br>of<br>transcript<br>ion;<br>Flags:<br>Precursor | 19,272.70 | 100.00% | 3  | 3  | 3  | 0.02% | 27.90% | VLGLTV 2.75<br>SLIQDAG<br>R           | 1,441.84 |
| Control | 6011 | PDIA3 gi 1461869<br>protein 33,gi 14823<br>0374                                                                                                                                                                                                                          | 56,913.80 | 100.00% | 20 | 24 | 37 | 0.29% | 38.80% | DLFSEA 3.75<br>HSEFLK                 | 1,422.69 |

|         |      |                   |                                   |           |         |    |    |    |       |        |                                            |          |
|---------|------|-------------------|-----------------------------------|-----------|---------|----|----|----|-------|--------|--------------------------------------------|----------|
| Control | 6011 | PDIA3<br>protein  | gi 1461869<br>33,gi 14823<br>0374 | 56,913.80 | 100.00% | 20 | 24 | 37 | 0.29% | 38.80% | EATNPP 2.14<br>VIQEEKP<br>K                | 1,579.83 |
| Control | 6011 | PDIA3<br>protein  | gi 1461869<br>33,gi 14823<br>0374 | 56,913.80 | 100.00% | 20 | 24 | 37 | 0.29% | 38.80% | ELSDFIS 2.77<br>YLK                        | 1,214.63 |
| Control | 6011 | PDIA3<br>protein  | gi 1461869<br>33,gi 14823<br>0374 | 56,913.80 | 100.00% | 20 | 24 | 37 | 0.29% | 38.80% | ELSDFIS 2.55<br>YLKR                       | 1,370.73 |
| Control | 6011 | PDIA3<br>protein  | gi 1461869<br>33,gi 14823<br>0374 | 56,913.80 | 100.00% | 20 | 24 | 37 | 0.29% | 38.80% | FLEDYF 3.29<br>DGNLK                       | 1,360.64 |
| Control | 6011 | PDIA3<br>protein  | gi 1461869<br>33,gi 14823<br>0374 | 56,913.80 | 100.00% | 20 | 24 | 37 | 0.29% | 38.80% | FLEDYF 3.68<br>DGNLKR                      | 1,516.74 |
| Control | 6011 | PDIA3<br>protein  | gi 1461869<br>33,gi 14823<br>0374 | 56,913.80 | 100.00% | 20 | 24 | 37 | 0.29% | 38.80% | FVMQEE 3.13<br>FSR                         | 1,188.54 |
| Control | 6011 | PDIA3<br>protein  | gi 1461869<br>33,gi 14823<br>0374 | 56,913.80 | 100.00% | 20 | 24 | 37 | 0.29% | 38.80% | GFPTIYF 2.39<br>SPANK                      | 1,341.68 |
| Control | 6011 | PDIA3<br>protein  | gi 1461869<br>33,gi 14823<br>0374 | 56,913.80 | 100.00% | 20 | 24 | 37 | 0.29% | 38.80% | GFPTIYF 3.3<br>SPANKK                      | 1,469.78 |
| Control | 6011 | PDIA3<br>protein  | gi 1461869<br>33,gi 14823<br>0374 | 56,913.80 | 100.00% | 20 | 24 | 37 | 0.29% | 38.80% | IFRDGEE 5.22<br>SGAYDG<br>PR               | 1,668.76 |
| Control | 6011 | PDIA3<br>protein  | gi 1461869<br>33,gi 14823<br>0374 | 56,913.80 | 100.00% | 20 | 24 | 37 | 0.29% | 38.80% | KLAPEY 4.02<br>EAAATR                      | 1,319.70 |
| Control | 6011 | PDIA3<br>protein  | gi 1461869<br>33,gi 14823<br>0374 | 56,913.80 | 100.00% | 20 | 24 | 37 | 0.29% | 38.80% | KLHFAV 2.39<br>ASR                         | 1,028.60 |
| Control | 6011 | PDIA3<br>protein  | gi 1461869<br>33,gi 14823<br>0374 | 56,913.80 | 100.00% | 20 | 24 | 37 | 0.29% | 38.80% | KTFSHEL 2.57<br>SDFGLES<br>TTGEIPV<br>VAVR | 2,719.39 |
| Control | 6011 | PDIA3<br>protein  | gi 1461869<br>33,gi 14823<br>0374 | 56,913.80 | 100.00% | 20 | 24 | 37 | 0.29% | 38.80% | LAPEYE 2.61<br>AAATR                       | 1,191.60 |
| Control | 6011 | PDIA3<br>protein  | gi 1461869<br>33,gi 14823<br>0374 | 56,913.80 | 100.00% | 20 | 24 | 37 | 0.29% | 38.80% | LRKDPNI 3.03<br>VIAK                       | 1,266.79 |
| Control | 6011 | PDIA3<br>protein  | gi 1461869<br>33,gi 14823<br>0374 | 56,913.80 | 100.00% | 20 | 24 | 37 | 0.29% | 38.80% | MDATAN 4.48<br>DVPSPY<br>EVR               | 1,680.75 |
| Control | 6011 | PDIA3<br>protein  | gi 1461869<br>33,gi 14823<br>0374 | 56,913.80 | 100.00% | 20 | 24 | 37 | 0.29% | 38.80% | QAGPAS 2.62<br>VPLKSEE<br>EFEK             | 1,845.92 |
| Control | 6011 | PDIA3<br>protein  | gi 1461869<br>33,gi 14823<br>0374 | 56,913.80 | 100.00% | 20 | 24 | 37 | 0.29% | 38.80% | TADGIVS 2.19<br>HLKK                       | 1,168.67 |
| Control | 6011 | PDIA3<br>protein  | gi 1461869<br>33,gi 14823<br>0374 | 56,913.80 | 100.00% | 20 | 24 | 37 | 0.29% | 38.80% | TFSHELS 5.07<br>DFGLEST<br>TGEIPVV<br>AVR  | 2,591.30 |
| Control | 6011 | PDIA3<br>protein  | gi 1461869<br>33,gi 14823<br>0374 | 56,913.80 | 100.00% | 20 | 24 | 37 | 0.29% | 38.80% | YGVSGY 2.84<br>PTLK                        | 1,084.57 |
| Control | 6011 | PECAM1<br>protein | gi 1113085<br>31                  | 82,597.50 | 100.00% | 5  | 8  | 20 | 0.16% | 6.37%  | APVHFTI 2.31<br>EK                         | 1,041.57 |
| Control | 6011 | PECAM1<br>protein | gi 1113085<br>31                  | 82,597.50 | 100.00% | 5  | 8  | 20 | 0.16% | 6.37%  | FHIPEG 2.62<br>K                           | 940.5252 |
| Control | 6011 | PECAM1<br>protein | gi 1113085<br>31                  | 82,597.50 | 100.00% | 5  | 8  | 20 | 0.16% | 6.37%  | GTETVY 2.57<br>SEIR                        | 1,154.57 |
| Control | 6011 | PECAM1<br>protein | gi 1113085<br>31                  | 82,597.50 | 100.00% | 5  | 8  | 20 | 0.16% | 6.37%  | PAVPLL 2.19<br>NSNNEK                      | 1,295.70 |

|         |      |                                                                                                                            |                           |           |         |    |    |     |       |        |                                  |      |          |
|---------|------|----------------------------------------------------------------------------------------------------------------------------|---------------------------|-----------|---------|----|----|-----|-------|--------|----------------------------------|------|----------|
| Control | 6011 | PECAM1<br>protein                                                                                                          | gi 1113085<br>31          | 82,597.50 | 100.00% | 5  | 8  | 20  | 0.16% | 6.37%  | QMPVE<br>MSRPAV<br>PLLNSN<br>NEK | 2.66 | 2,270.13 |
| Control | 6011 | RecName<br>:<br>Full=FAS<br>associate<br>d factor<br>2;<br>AltName:<br>Full=UB<br>X domain-<br>containin<br>g protein<br>8 | gi 1098961<br>51,gi 11600 | 52,646.60 | 100.00% | 3  | 3  | 3   | 0.02% | 7.42%  | FQIEANF<br>PR                    | 2.84 | 1,121.57 |
| Control | 6011 | RecName<br>:<br>Full=FAS<br>associate<br>d factor<br>2;<br>AltName:<br>Full=UB<br>X domain-<br>containin<br>g protein<br>8 | gi 1098961<br>51,gi 11600 | 52,646.60 | 100.00% | 3  | 3  | 3   | 0.02% | 7.42%  | IYSYVVS<br>RPQPR                 | 2.99 | 1,464.80 |
| Control | 6011 | RecName<br>:<br>Full=FAS<br>associate<br>d factor<br>2;<br>AltName:<br>Full=UB<br>X domain-<br>containin<br>g protein<br>8 | gi 1098961<br>51,gi 11600 | 52,646.60 | 100.00% | 3  | 3  | 3   | 0.02% | 7.42%  | QQQDEA<br>YLASLR                 | 2.8  | 1,421.70 |
| Control | 6011 | RecName<br>:<br>Full=40S<br>ribosomal<br>protein<br>S16                                                                    | gi 1088609<br>53,gi 74354 | 16,427.90 | 100.00% | 3  | 3  | 4   | 0.03% | 21.90% | EIKDILIQ<br>YDR                  | 3.09 | 1,405.77 |
| Control | 6011 | RecName<br>:<br>Full=40S<br>ribosomal<br>protein<br>S16                                                                    | gi 1088609<br>53,gi 74354 | 16,427.90 | 100.00% | 3  | 3  | 4   | 0.03% | 21.90% | GPLQSV<br>QVFGR                  | 3.28 | 1,187.65 |
| Control | 6011 | RecName<br>:<br>Full=40S<br>ribosomal<br>protein<br>S16                                                                    | gi 1088609<br>53,gi 74354 | 16,427.90 | 100.00% | 3  | 3  | 4   | 0.03% | 21.90% | LLEPVLL<br>LGK                   | 2.22 | 1,094.72 |
| Control | 6011 | vimentin                                                                                                                   | gi 1103475<br>70          | 53,710.80 | 100.00% | 35 | 52 | 130 | 1.01% | 68.70% | DGQVIN<br>ETSQHH<br>DDLE         | 2.97 | 1,836.80 |

|         |      |          |                  |           |         |    |    |     |       |        |                                                             |          |
|---------|------|----------|------------------|-----------|---------|----|----|-----|-------|--------|-------------------------------------------------------------|----------|
| Control | 6011 | vimentin | gi 1103475<br>70 | 53,710.80 | 100.00% | 35 | 52 | 130 | 1.01% | 68.70% | DNLAEDI 2.65<br>MR                                          | 1,092.50 |
| Control | 6011 | vimentin | gi 1103475<br>70 | 53,710.80 | 100.00% | 35 | 52 | 130 | 1.01% | 68.70% | EEAESTL 2.97<br>QSFR                                        | 1,296.61 |
| Control | 6011 | vimentin | gi 1103475<br>70 | 53,710.80 | 100.00% | 35 | 52 | 130 | 1.01% | 68.70% | EEAESTL 4.07<br>QSFQD<br>VDNASL<br>AR                       | 2,366.12 |
| Control | 6011 | vimentin | gi 1103475<br>70 | 53,710.80 | 100.00% | 35 | 52 | 130 | 1.01% | 68.70% | EKLQEE 4.37<br>MLQREE<br>AESTLQS<br>FR                      | 2,597.25 |
| Control | 6011 | vimentin | gi 1103475<br>70 | 53,710.80 | 100.00% | 35 | 52 | 130 | 1.01% | 68.70% | EMEENF 3.39<br>SVEAAN<br>YQDTIG<br>R                        | 2,218.96 |
| Control | 6011 | vimentin | gi 1103475<br>70 | 53,710.80 | 100.00% | 35 | 52 | 130 | 1.01% | 68.70% | ETNLDS 3.36<br>LPLVDT<br>HSK                                | 1,668.84 |
| Control | 6011 | vimentin | gi 1103475<br>70 | 53,710.80 | 100.00% | 35 | 52 | 130 | 1.01% | 68.70% | ETNLDS 4.21<br>LPLVDT<br>HSKR                               | 1,824.95 |
| Control | 6011 | vimentin | gi 1103475<br>70 | 53,710.80 | 100.00% | 35 | 52 | 130 | 1.01% | 68.70% | EYQDLL 2.46<br>NVK                                          | 1,121.58 |
| Control | 6011 | vimentin | gi 1103475<br>70 | 53,710.80 | 100.00% | 35 | 52 | 130 | 1.01% | 68.70% | FADLSE 3.8<br>AANR                                          | 1,093.53 |
| Control | 6011 | vimentin | gi 1103475<br>70 | 53,710.80 | 100.00% | 35 | 52 | 130 | 1.01% | 68.70% | FADLSE 2.39<br>AANRNN<br>DALR                               | 1,776.86 |
| Control | 6011 | vimentin | gi 1103475<br>70 | 53,710.80 | 100.00% | 35 | 52 | 130 | 1.01% | 68.70% | FANYID 2.64<br>KVR                                          | 1,125.61 |
| Control | 6011 | vimentin | gi 1103475<br>70 | 53,710.80 | 100.00% | 35 | 52 | 130 | 1.01% | 68.70% | ILLAELE 4.4<br>QLK                                          | 1,169.71 |
| Control | 6011 | vimentin | gi 1103475<br>70 | 53,710.80 | 100.00% | 35 | 52 | 130 | 1.01% | 68.70% | ILLAELE 4.45<br>QLKGQG<br>K                                 | 1,539.91 |
| Control | 6011 | vimentin | gi 1103475<br>70 | 53,710.80 | 100.00% | 35 | 52 | 130 | 1.01% | 68.70% | ISLPLPN 4.65<br>FSSLNLR                                     | 1,570.90 |
| Control | 6011 | vimentin | gi 1103475<br>70 | 53,710.80 | 100.00% | 35 | 52 | 130 | 1.01% | 68.70% | KLHDEEI 6.67<br>QELQAQI<br>QEQHVQ<br>IDMDVS<br>KPDLT<br>ALR | 4,085.06 |
| Control | 6011 | vimentin | gi 1103475<br>70 | 53,710.80 | 100.00% | 35 | 52 | 130 | 1.01% | 68.70% | KVESLQ 5.35<br>EEIAFLK                                      | 1,533.85 |
| Control | 6011 | vimentin | gi 1103475<br>70 | 53,710.80 | 100.00% | 35 | 52 | 130 | 1.01% | 68.70% | KVESLQ 5.31<br>EEIAFLK<br>K                                 | 1,661.95 |
| Control | 6011 | vimentin | gi 1103475<br>70 | 53,710.80 | 100.00% | 35 | 52 | 130 | 1.01% | 68.70% | LGDLYE 2.48<br>EEMR                                         | 1,254.57 |
| Control | 6011 | vimentin | gi 1103475<br>70 | 53,710.80 | 100.00% | 35 | 52 | 130 | 1.01% | 68.70% | LHDEEIQ 5.9<br>ELQAQIQ<br>EQHVQI<br>DMDVSK<br>PDLTAA<br>LR  | 3,956.97 |
| Control | 6011 | vimentin | gi 1103475<br>70 | 53,710.80 | 100.00% | 35 | 52 | 130 | 1.01% | 68.70% | LLQDSV 4.33<br>DFSLAD<br>AINTEFK                            | 2,126.07 |
| Control | 6011 | vimentin | gi 1103475<br>70 | 53,710.80 | 100.00% | 35 | 52 | 130 | 1.01% | 68.70% | LQDEIQ 3.85<br>NMKEE<br>MAR                                 | 1,750.81 |
| Control | 6011 | vimentin | gi 1103475<br>70 | 53,710.80 | 100.00% | 35 | 52 | 130 | 1.01% | 68.70% | LQEEML 5.03<br>QREEAE<br>STLQSFR                            | 2,340.11 |

|         |      |                                                |                                                                  |           |         |    |    |     |       |        |                                                   |          |
|---------|------|------------------------------------------------|------------------------------------------------------------------|-----------|---------|----|----|-----|-------|--------|---------------------------------------------------|----------|
| Control | 6011 | vimentin                                       | gi 1103475<br>70                                                 | 53,710.80 | 100.00% | 35 | 52 | 130 | 1.01% | 68.70% | LQEEML 4.05<br>QREEAE<br>STLQSF<br>QDQDNA<br>SLAR | 3,409.63 |
| Control | 6011 | vimentin                                       | gi 1103475<br>70                                                 | 53,710.80 | 100.00% | 35 | 52 | 130 | 1.01% | 68.70% | MALDIEI 3.45<br>ATYR                              | 1,311.66 |
| Control | 6011 | vimentin                                       | gi 1103475<br>70                                                 | 53,710.80 | 100.00% | 35 | 52 | 130 | 1.01% | 68.70% | MALDIEI 2.32<br>ATYRK                             | 1,439.76 |
| Control | 6011 | vimentin                                       | gi 1103475<br>70                                                 | 53,710.80 | 100.00% | 35 | 52 | 130 | 1.01% | 68.70% | MFGGPG 2.57<br>TASRPSS<br>TR                      | 1,508.73 |
| Control | 6011 | vimentin                                       | gi 1103475<br>70                                                 | 53,710.80 | 100.00% | 35 | 52 | 130 | 1.01% | 68.70% | NLQEAE 2.45<br>EWYK                               | 1,309.61 |
| Control | 6011 | vimentin                                       | gi 1103475<br>70                                                 | 53,710.80 | 100.00% | 35 | 52 | 130 | 1.01% | 68.70% | SRLGDL 3.84<br>YEEEMR                             | 1,513.70 |
| Control | 6011 | vimentin                                       | gi 1103475<br>70                                                 | 53,710.80 | 100.00% | 35 | 52 | 130 | 1.01% | 68.70% | TLYTSSP 4.24<br>GGVYAT<br>R                       | 1,472.74 |
| Control | 6011 | vimentin                                       | gi 1103475<br>70                                                 | 53,710.80 | 100.00% | 35 | 52 | 130 | 1.01% | 68.70% | TNEKVE 4.35<br>LQELND<br>R                        | 1,587.80 |
| Control | 6011 | vimentin                                       | gi 1103475<br>70                                                 | 53,710.80 | 100.00% | 35 | 52 | 130 | 1.01% | 68.70% | TNEKVE 4.33<br>LQELND<br>RFANYI<br>DK             | 2,439.22 |
| Control | 6011 | vimentin                                       | gi 1103475<br>70                                                 | 53,710.80 | 100.00% | 35 | 52 | 130 | 1.01% | 68.70% | TVETRD 4.44<br>GQVINE<br>TSQHHD<br>DLE            | 2,423.11 |
| Control | 6011 | vimentin                                       | gi 1103475<br>70                                                 | 53,710.80 | 100.00% | 35 | 52 | 130 | 1.01% | 68.70% | VELQEL 3.21<br>NDR                                | 1,115.57 |
| Control | 6011 | vimentin                                       | gi 1103475<br>70                                                 | 53,710.80 | 100.00% | 35 | 52 | 130 | 1.01% | 68.70% | VEVERD 4.05<br>NLAEDI<br>MR                       | 1,688.83 |
| Control | 6011 | Leucine<br>rich<br>repeat<br>containin<br>g 59 | gi 1096593<br>25,gi 59857<br>957,gi 7507<br>0060,gi 777<br>36103 | 34,862.40 | 100.00% | 7  | 11 | 20  | 0.16% | 22.20% | DKLDGN 5.14<br>ELDLCLS<br>DLNEVP<br>VK            | 2,313.18 |
| Control | 6011 | Leucine<br>rich<br>repeat<br>containin<br>g 59 | gi 1096593<br>25,gi 59857<br>957,gi 7507<br>0060,gi 777<br>36103 | 34,862.40 | 100.00% | 7  | 11 | 20  | 0.16% | 22.20% | DKLDGN 6.26<br>ELDLCLS<br>DLNEVP<br>VKELAA<br>LPK | 3,035.62 |
| Control | 6011 | Leucine<br>rich<br>repeat<br>containin<br>g 59 | gi 1096593<br>25,gi 59857<br>957,gi 7507<br>0060,gi 777<br>36103 | 34,862.40 | 100.00% | 7  | 11 | 20  | 0.16% | 22.20% | LDGNEL 4.38<br>DLSLSDL<br>NEVPVK                  | 2,070.06 |
| Control | 6011 | Leucine<br>rich<br>repeat<br>containin<br>g 59 | gi 1096593<br>25,gi 59857<br>957,gi 7507<br>0060,gi 777<br>36103 | 34,862.40 | 100.00% | 7  | 11 | 20  | 0.16% | 22.20% | LDGNEL 2.98<br>DLSLSDL<br>NEVPVK<br>ELAALP<br>K   | 2,792.49 |
| Control | 6011 | Leucine<br>rich<br>repeat<br>containin<br>g 59 | gi 1096593<br>25,gi 59857<br>957,gi 7507<br>0060,gi 777<br>36103 | 34,862.40 | 100.00% | 7  | 11 | 20  | 0.16% | 22.20% | LVNLQH 2.94<br>LDLLNN<br>R                        | 1,561.88 |
| Control | 6011 | Leucine<br>rich<br>repeat<br>containin<br>g 59 | gi 1096593<br>25,gi 59857<br>957,gi 7507<br>0060,gi 777<br>36103 | 34,862.40 | 100.00% | 7  | 11 | 20  | 0.16% | 22.20% | LVTLPVS 4.66<br>FAQLK                             | 1,315.80 |
| Control | 6011 | Leucine<br>rich<br>repeat<br>containin<br>g 59 | gi 1096593<br>25,gi 59857<br>957,gi 7507<br>0060,gi 777<br>36103 | 34,862.40 | 100.00% | 7  | 11 | 20  | 0.16% | 22.20% | WDLKD 2.97<br>NPLDPV<br>LAK                       | 1,736.96 |

|         |      |                                                                                                                                                                                                                                                                                                                 |           |         |   |   |    |       |        |                              |          |
|---------|------|-----------------------------------------------------------------------------------------------------------------------------------------------------------------------------------------------------------------------------------------------------------------------------------------------------------------|-----------|---------|---|---|----|-------|--------|------------------------------|----------|
| Control | 6011 | RecName gi 1108257<br>: 57,gi 73587<br>Full=CD 067,gi 7740<br>GSH iron 4223<br>sulfur<br>domain-<br>containin<br>g protein<br>1;<br>AltName:<br>Full=Mit<br>oNEET                                                                                                                                               | 11,964.80 | 99.80%  | 2 | 3 | 5  | 0.04% | 26.40% | HNEETG 4.87<br>DNVGPLI<br>IK | 1,635.83 |
| Control | 6011 | RecName gi 1108257<br>: 57,gi 73587<br>Full=CD 067,gi 7740<br>GSH iron 4223<br>sulfur<br>domain-<br>containin<br>g protein<br>1;<br>AltName:<br>Full=Mit<br>oNEET                                                                                                                                               | 11,964.80 | 99.80%  | 2 | 3 | 5  | 0.04% | 26.40% | VVHAFD 3.93<br>MEDLGD<br>K   | 1,491.68 |
| Control | 6011 | RecName gi 1221440<br>: 79,gi 14623<br>Full=Stre 1780,gi 735<br>ss-70 86960,gi 77<br>protein, 735995<br>mitochon<br>drial;<br>AltName:<br>Full=75<br>kDa<br>glucose-<br>regulated<br>protein;<br>AltName:<br>Full=GR<br>P 75;<br>AltName:<br>Full=Hea<br>t shock<br>70 kDa<br>protein 9;<br>Flags:<br>Precursor | 73,724.40 | 100.00% | 8 | 9 | 11 | 0.09% | 18.30% | DAGQIS 3.86<br>GLNVLR        | 1,242.68 |

|         |      |                                                                                                                                                                                                                                                                                                                 |           |         |   |   |    |       |        |                                         |          |
|---------|------|-----------------------------------------------------------------------------------------------------------------------------------------------------------------------------------------------------------------------------------------------------------------------------------------------------------------|-----------|---------|---|---|----|-------|--------|-----------------------------------------|----------|
| Control | 6011 | RecName gi 1221440 :<br>79,gi 14623<br>Full=Stre 1780,gi 735<br>ss-70 86960,gi 77<br>protein, 735995<br>mitochon<br>drial;<br>AltName:<br>Full=75<br>kDa<br>glucose-<br>regulated<br>protein;<br>AltName:<br>Full=GR<br>P 75;<br>AltName:<br>Full=Hea<br>t shock<br>70 kDa<br>protein 9;<br>Flags:<br>Precursor | 73,724.40 | 100.00% | 8 | 9 | 11 | 0.09% | 18.30% | EQQIVIQ 3.37<br>SSGGLS<br>KDDIEN<br>MVK | 2,434.21 |
| Control | 6011 | RecName gi 1221440 :<br>79,gi 14623<br>Full=Stre 1780,gi 735<br>ss-70 86960,gi 77<br>protein, 735995<br>mitochon<br>drial;<br>AltName:<br>Full=75<br>kDa<br>glucose-<br>regulated<br>protein;<br>AltName:<br>Full=GR<br>P 75;<br>AltName:<br>Full=Hea<br>t shock<br>70 kDa<br>protein 9;<br>Flags:<br>Precursor | 73,724.40 | 100.00% | 8 | 9 | 11 | 0.09% | 18.30% | LYSPSQI 4.58<br>GAFVLM<br>K             | 1,569.83 |



|         |      |                                                                                                                                                                                                                                                                                                                 |           |         |   |   |    |       |        |                              |          |
|---------|------|-----------------------------------------------------------------------------------------------------------------------------------------------------------------------------------------------------------------------------------------------------------------------------------------------------------------|-----------|---------|---|---|----|-------|--------|------------------------------|----------|
| Control | 6011 | RecName gi 1221440<br>: 79,gi 14623<br>Full=Stre 1780,gi 735<br>ss-70 86960,gi 77<br>protein, 735995<br>mitochon<br>drial;<br>AltName:<br>Full=75<br>kDa<br>glucose-<br>regulated<br>protein;<br>AltName:<br>Full=GR<br>P 75;<br>AltName:<br>Full=Hea<br>t shock<br>70 kDa<br>protein 9;<br>Flags:<br>Precursor | 73,724.40 | 100.00% | 8 | 9 | 11 | 0.09% | 18.30% | MKETAE 4.19<br>NYLGHT<br>AK  | 1,608.77 |
| Control | 6011 | RecName gi 1221440<br>: 79,gi 14623<br>Full=Stre 1780,gi 735<br>ss-70 86960,gi 77<br>protein, 735995<br>mitochon<br>drial;<br>AltName:<br>Full=75<br>kDa<br>glucose-<br>regulated<br>protein;<br>AltName:<br>Full=GR<br>P 75;<br>AltName:<br>Full=Hea<br>t shock<br>70 kDa<br>protein 9;<br>Flags:<br>Precursor | 73,724.40 | 100.00% | 8 | 9 | 11 | 0.09% | 18.30% | NAVITVP 2.46<br>AYFNDS<br>QR | 1,694.85 |



|         |      |                                                                                                                                                                                     |                                                   |           |         |   |   |    |       |        |                                                      |          |
|---------|------|-------------------------------------------------------------------------------------------------------------------------------------------------------------------------------------|---------------------------------------------------|-----------|---------|---|---|----|-------|--------|------------------------------------------------------|----------|
| Control | 6011 | RecName : Full=Stre ss-70 protein, mitochondrial; AltName: Full=75 kDa glucose-regulated protein; AltName: Full=GRP 75; AltName: Full=Heat shock 70 kDa protein 9; Flags: Precursor | gi 122144079,gi 146231780,gi 73586960,gi 77735995 | 73,724.40 | 100.00% | 8 | 9 | 11 | 0.09% | 18.30% | TTPSVV 2.9<br>AFTADGER                               | 1,450.72 |
| Control | 6011 | RAB14 protein                                                                                                                                                                       | gi 158455025,gi 195539521                         | 23,879.60 | 100.00% | 7 | 9 | 12 | 0.09% | 46.00% | ADLEAQ 3.82<br>RDVITYE<br>EAK                        | 1,737.83 |
| Control | 6011 | RAB14 protein                                                                                                                                                                       | gi 158455025,gi 195539521                         | 23,879.60 | 100.00% | 7 | 9 | 12 | 0.09% | 46.00% | GAAGAL 3.75<br>MVYDIT<br>R                           | 1,353.68 |
| Control | 6011 | RAB14 protein                                                                                                                                                                       | gi 158455025,gi 195539521                         | 23,879.60 | 100.00% | 7 | 9 | 12 | 0.09% | 46.00% | IYQNIQD 4.26<br>GSLDLN<br>AAESGV<br>QHKPSA<br>PQGGR  | 3,150.56 |
| Control | 6011 | RAB14 protein                                                                                                                                                                       | gi 158455025,gi 195539521                         | 23,879.60 | 100.00% | 7 | 9 | 12 | 0.09% | 46.00% | KIYQNIQ 7.18<br>DGSLDL<br>NAAESG<br>VQHKPS<br>APQGGR | 3,278.65 |
| Control | 6011 | RAB14 protein                                                                                                                                                                       | gi 158455025,gi 195539521                         | 23,879.60 | 100.00% | 7 | 9 | 12 | 0.09% | 46.00% | LQIWDT 2.59<br>AGQER                                 | 1,316.66 |
| Control | 6011 | RAB14 protein                                                                                                                                                                       | gi 158455025,gi 195539521                         | 23,879.60 | 100.00% | 7 | 9 | 12 | 0.09% | 46.00% | NLTNPN 4.45<br>TVIILIGN<br>K                         | 1,623.94 |
| Control | 6011 | RAB14 protein                                                                                                                                                                       | gi 158455025,gi 195539521                         | 23,879.60 | 100.00% | 7 | 9 | 12 | 0.09% | 46.00% | TGENVE 2.85<br>DAFLEA<br>AK                          | 1,493.71 |
| Control | 6011 | RAB2A, member RAS oncogene family                                                                                                                                                   | gi 109939903,gi 116734835                         | 20,833.10 | 100.00% | 4 | 5 | 7  | 0.05% | 27.50% | EHGLIF 2.95<br>METSACK                               | 1,378.67 |
| Control | 6011 | RAB2A, member RAS oncogene family                                                                                                                                                   | gi 109939903,gi 116734835                         | 20,833.10 | 100.00% | 4 | 5 | 7  | 0.05% | 27.50% | FQPVHD 3.44<br>LTIGVEF<br>GAR                        | 1,785.93 |
| Control | 6011 | RAB2A, member RAS oncogene family                                                                                                                                                   | gi 109939903,gi 116734835                         | 20,833.10 | 100.00% | 4 | 5 | 7  | 0.05% | 27.50% | GAAGAL 3.72<br>LVYDITR                               | 1,319.73 |

|         |      |                                                                                                                                    |                                                  |           |         |   |   |   |       |        |                                                |      |          |
|---------|------|------------------------------------------------------------------------------------------------------------------------------------|--------------------------------------------------|-----------|---------|---|---|---|-------|--------|------------------------------------------------|------|----------|
| Control | 6011 | RAB2A, member RAS oncogene family                                                                                                  | gi 109939903,gi 116734835                        | 20,833.10 | 100.00% | 4 | 5 | 7 | 0.05% | 27.50% | YIIIGDT<br>GVGK                                | 3.02 | 1,135.64 |
| Control | 6011 | RecName : Full=Phosphoglycerate kinase 1                                                                                           | gi 108860885,gi 74353972,gi 7773551              | 44,520.20 | 100.00% | 4 | 6 | 7 | 0.05% | 15.30% | AHSSMV<br>GVNLPK                               | 3.71 | 1,255.65 |
| Control | 6011 | RecName : Full=Phosphoglycerate kinase 1                                                                                           | gi 108860885,gi 74353972,gi 7773551              | 44,520.20 | 100.00% | 4 | 6 | 7 | 0.05% | 15.30% | ALESPER<br>PFLAILG<br>GAK                      | 3.4  | 1,769.00 |
| Control | 6011 | RecName : Full=Phosphoglycerate kinase 1                                                                                           | gi 108860885,gi 74353972,gi 7773551              | 44,520.20 | 100.00% | 4 | 6 | 7 | 0.05% | 15.30% | VDFNVP<br>MKNNQI<br>TNNQR                      | 3.18 | 2,048.00 |
| Control | 6011 | RecName : Full=Phosphoglycerate kinase 1                                                                                           | gi 108860885,gi 74353972,gi 7773551              | 44,520.20 | 100.00% | 4 | 6 | 7 | 0.05% | 15.30% | VLNNME<br>IGTSLFD<br>EEGSK                     | 4.02 | 1,998.93 |
| Control | 6011 | PREDICTED: LMBR1 domain containin g 2                                                                                              | gi 119913265                                     | 81,156.60 | 99.80%  | 2 | 2 | 2 | 0.02% | 7.05%  | DRIELLQ<br>DAEPLD<br>FNAETFT<br>DDPLESE<br>SGR | 4.38 | 3,422.59 |
| Control | 6011 | PREDICTED: LMBR1 domain containin g 2                                                                                              | gi 119913265                                     | 81,156.60 | 99.80%  | 2 | 2 | 2 | 0.02% | 7.05%  | NMDDYE<br>DFDEKH<br>NTYPSE<br>K                | 2.76 | 2,392.95 |
| Control | 6011 | RecName : Full=Spliceosome RNA helicase BAT1; AltName: Full=DEAD box protein UAP56; AltName: Full=56 kDa U2AF65-associated protein | gi 122140442,gi 27883545,gi 74353855,gi 75832045 | 48,947.00 | 99.80%  | 2 | 2 | 3 | 0.02% | 6.78%  | ILVATNL<br>FGR                                 | 3.11 | 1,103.66 |

|         |      |                                                                                                                                                                                           |                                                                                                                                                                                            |           |         |   |   |   |       |        |                                                |      |          |
|---------|------|-------------------------------------------------------------------------------------------------------------------------------------------------------------------------------------------|--------------------------------------------------------------------------------------------------------------------------------------------------------------------------------------------|-----------|---------|---|---|---|-------|--------|------------------------------------------------|------|----------|
| Control | 6011 | RecName<br>:<br>Full=Spli<br>ceosome<br>RNA<br>helicase<br>BAT1;<br>AltName:<br>Full=DE<br>AD box<br>protein<br>UAP56;<br>AltName:<br>Full=56<br>kDa<br>U2AF65-<br>associate<br>d protein | gi 1221404<br>42,gi 27883<br>545,gi 7435<br>3855,gi 758<br>32045                                                                                                                           | 48,947.00 | 99.80%  | 2 | 2 | 3 | 0.02% | 6.78%  | VNIAFN<br>YDMPED<br>SDTYLH<br>R                | 3.12 | 2,316.02 |
| Control | 6011 | FAP<br>protein                                                                                                                                                                            | gi 1461864<br>88,gi 14823<br>3352                                                                                                                                                          | 87,719.00 | 99.80%  | 2 | 2 | 2 | 0.02% | 3.55%  | FMGLPT<br>KDDNLK                               | 2.23 | 1,394.70 |
| Control | 6011 | FAP<br>protein                                                                                                                                                                            | gi 1461864<br>88,gi 14823<br>3352                                                                                                                                                          | 87,719.00 | 99.80%  | 2 | 2 | 2 | 0.02% | 3.55%  | IFIIDATY<br>PEHIGPR                            | 3.12 | 1,741.93 |
| Control | 6011 | PREDIC<br>TED:<br>similar to<br>endonucl<br>ease G-<br>like 1<br>isoform 2                                                                                                                | gi 1199143<br>18                                                                                                                                                                           | 41,059.10 | 99.80%  | 2 | 2 | 2 | 0.02% | 7.61%  | AVLEQF<br>GFPLAG<br>TETR                       | 3.85 | 1,735.90 |
| Control | 6011 | PREDIC<br>TED:<br>similar to<br>endonucl<br>ease G-<br>like 1<br>isoform 2                                                                                                                | gi 1199143<br>18                                                                                                                                                                           | 41,059.10 | 99.80%  | 2 | 2 | 2 | 0.02% | 7.61%  | LSGLVFF<br>PHLDR                               | 3.03 | 1,400.77 |
| Control | 6011 | Chain R,<br>Cadmium<br>Ion<br>Binding<br>Structure<br>Of<br>Bovine<br>Heart<br>Cytochro<br>me C<br>Oxidase<br>In The<br>Fully<br>Reduced<br>State                                         | gi 1492415<br>23,gi 14924<br>1540,gi 149<br>241553,gi 1<br>49241570,g<br>i 14924158<br>3,gi 149241<br>600,gi 1492<br>41613,gi 42<br>564216,gi 5<br>0872151,gi <br>60391934,g<br>i 81674705 | 16,717.40 | 100.00% | 3 | 4 | 9 | 0.07% | 35.50% | EIYPYVI<br>QELRPTL<br>NELGIST<br>PEELGL<br>DKV | 6.97 | 3,428.82 |
| Control | 6011 | Chain R,<br>Cadmium<br>Ion<br>Binding<br>Structure<br>Of<br>Bovine<br>Heart<br>Cytochro<br>me C<br>Oxidase<br>In The<br>Fully<br>Reduced<br>State                                         | gi 1492415<br>23,gi 14924<br>1540,gi 149<br>241553,gi 1<br>49241570,g<br>i 14924158<br>3,gi 149241<br>600,gi 1492<br>41613,gi 42<br>564216,gi 5<br>0872151,gi <br>60391934,g<br>i 81674705 | 16,717.40 | 100.00% | 3 | 4 | 9 | 0.07% | 35.50% | GMNTLV<br>GYDLVP<br>EPK                        | 4.06 | 1,648.83 |

|         |      |                                                                                                                                                                                                                                                                                                          |           |         |   |    |    |       |        |                                   |      |          |
|---------|------|----------------------------------------------------------------------------------------------------------------------------------------------------------------------------------------------------------------------------------------------------------------------------------------------------------|-----------|---------|---|----|----|-------|--------|-----------------------------------|------|----------|
| Control | 6011 | Chain R, gi 1492415<br>Cadmium 23,gi 14924<br>Ion 1540,gi 149<br>Binding 241553,gi 1<br>Structure 49241570,g<br>Of i 14924158<br>Bovine 3,gi 149241<br>Heart 600,gi 1492<br>Cytochro 41613,gi 42<br>me C 564216,gi 5<br>Oxidase 0872151,gi <br>In The 60391934,g<br>Fully i 81674705<br>Reduced<br>State | 16,717.40 | 100.00% | 3 | 4  | 9  | 0.07% | 35.50% | LNFAS<br>AVR                      | 2.5  | 992.5159 |
| Control | 6011 | nucleosid gi 1064895,<br>e- gi 1064897,<br>diphosph gi 1153118<br>ate kinase 23,gi 11549<br>NBR-A 6892,gi 119<br>224069,gi 1<br>51556410,g<br>i 16965838<br>2,gi 169658<br>384,gi 1709<br>243,gi 7435<br>4800                                                                                            | 17,307.40 | 99.80%  | 2 | 4  | 4  | 0.03% | 19.10% | TFIAIKP<br>DGVQR                  | 2.38 | 1,344.76 |
| Control | 6011 | nucleosid gi 1064895,<br>e- gi 1064897,<br>diphosph gi 1153118<br>ate kinase 23,gi 11549<br>NBR-A 6892,gi 119<br>224069,gi 1<br>51556410,g<br>i 16965838<br>2,gi 169658<br>384,gi 1709<br>243,gi 7435<br>4800                                                                                            | 17,307.40 | 99.80%  | 2 | 4  | 4  | 0.03% | 19.10% | VMLGET<br>NPADSK<br>PGTIR         | 3.4  | 1,801.91 |
| Control | 6011 | YME1L1 gi 1515571<br>protein 21,gi 15612<br>0349                                                                                                                                                                                                                                                         | 80,044.00 | 100.00% | 9 | 10 | 10 | 0.08% | 21.10% | DRGSDV<br>ESLDKL<br>MK            | 3.69 | 1,608.79 |
| Control | 6011 | YME1L1 gi 1515571<br>protein 21,gi 15612<br>0349                                                                                                                                                                                                                                                         | 80,044.00 | 100.00% | 9 | 10 | 10 | 0.08% | 21.10% | GTVGFS<br>GAELN<br>LVNQAA<br>LK   | 4.63 | 2,018.06 |
| Control | 6011 | YME1L1 gi 1515571<br>protein 21,gi 15612<br>0349                                                                                                                                                                                                                                                         | 80,044.00 | 100.00% | 9 | 10 | 10 | 0.08% | 21.10% | GVEEAK<br>QELQEV<br>VEFLK         | 4.47 | 1,975.04 |
| Control | 6011 | YME1L1 gi 1515571<br>protein 21,gi 15612<br>0349                                                                                                                                                                                                                                                         | 80,044.00 | 100.00% | 9 | 10 | 10 | 0.08% | 21.10% | GVEEAK<br>QELQEV<br>VEFLKN<br>PQK | 3.72 | 2,442.29 |
| Control | 6011 | YME1L1 gi 1515571<br>protein 21,gi 15612<br>0349                                                                                                                                                                                                                                                         | 80,044.00 | 100.00% | 9 | 10 | 10 | 0.08% | 21.10% | IKFDQSV<br>DPEIAR                 | 3.89 | 1,630.88 |
| Control | 6011 | YME1L1 gi 1515571<br>protein 21,gi 15612<br>0349                                                                                                                                                                                                                                                         | 80,044.00 | 100.00% | 9 | 10 | 10 | 0.08% | 21.10% | LAETQH<br>TAPSFV<br>K             | 4.15 | 1,428.75 |
| Control | 6011 | YME1L1 gi 1515571<br>protein 21,gi 15612<br>0349                                                                                                                                                                                                                                                         | 80,044.00 | 100.00% | 9 | 10 | 10 | 0.08% | 21.10% | LSPETQS<br>AIEQEIR                | 2.94 | 1,600.82 |

|         |      |                                                                                                                                                                                                         |                                                                                      |           |         |   |    |    |       |        |                                                                   |          |
|---------|------|---------------------------------------------------------------------------------------------------------------------------------------------------------------------------------------------------------|--------------------------------------------------------------------------------------|-----------|---------|---|----|----|-------|--------|-------------------------------------------------------------------|----------|
| Control | 6011 | YME1L1 protein                                                                                                                                                                                          | gi 1515571<br>21.gi 15612<br>0349                                                    | 80,044.00 | 100.00% | 9 | 10 | 10 | 0.08% | 21.10% | QTINQLL 3.17<br>AEMDGF<br>KPNEGVI<br>IIGATNF<br>PEALDN<br>ALIRPGR | 4,352.27 |
| Control | 6011 | YME1L1 protein                                                                                                                                                                                          | gi 1515571<br>21.gi 15612<br>0349                                                    | 80,044.00 | 100.00% | 9 | 10 | 10 | 0.08% | 21.10% | TTTGLD 4.06<br>SAVDPV<br>QMK                                      | 1,578.77 |
| Control | 6011 | RecName :<br>Full=Vesicle-associated membrane protein 8;<br>Short=VAMP-8                                                                                                                                | gi 1221404<br>20.gi 74353<br>894.gi 7773<br>5533                                     | 11,339.40 | 99.80%  | 2 | 3  | 4  | 0.03% | 24.00% | NKTEDL 4.47<br>EATSEHF<br>K                                       | 1,648.78 |
| Control | 6011 | RecName :<br>Full=Vesicle-associated membrane protein 8;<br>Short=VAMP-8                                                                                                                                | gi 1221404<br>20.gi 74353<br>894.gi 7773<br>5533                                     | 11,339.40 | 99.80%  | 2 | 3  | 4  | 0.03% | 24.00% | NLRDEV 2.94<br>EGVK                                               | 1,158.61 |
| Control | 6011 | RecName :<br>Full=Annexin A1;<br>AltName: Full=Annexin I;<br>Full=Lipocortin I;<br>AltName: Full=Calcactin II;<br>AltName: Full=Chromobindin-9;<br>AltName: Full=p35;<br>AltName: Full=Phospholipase A2 | gi 1185973<br>73.gi 26418<br>2.gi 615530<br>85.gi 73587<br>269.gi 7385<br>3762.gi 74 | 38,881.20 | 99.90%  | 2 | 2  | 2  | 0.02% | 8.96%  | ALLGHL 4.18<br>EEVVL<br>LLK                                       | 1,617.99 |

|         |      |                                                                                                                                                                                                                                                                                                                     |                                   |            |         |   |   |       |       |                          |                                 |          |          |
|---------|------|---------------------------------------------------------------------------------------------------------------------------------------------------------------------------------------------------------------------------------------------------------------------------------------------------------------------|-----------------------------------|------------|---------|---|---|-------|-------|--------------------------|---------------------------------|----------|----------|
| Control | 6011 | RecName<br>: gi 1185973<br>Full=Ann<br>exin A1;<br>AltName:<br>Full=Ann<br>exin-1;<br>AltName:<br>Full=Ann<br>exin I;<br>AltName:<br>Full=Lip<br>ocortin I;<br>AltName:<br>Full=Cal<br>pactin II;<br>AltName:<br>Full=Chr<br>omobindi<br>n-9;<br>AltName:<br>Full=p35;<br>AltName:<br>Full=Pho<br>spholipas<br>e A2 | 38,881.20                         | 99.90%     | 2       | 2 | 2 | 0.02% | 8.96% | GLGTDE<br>DTLNEIL<br>ASR | 3.29                            | 1,703.84 |          |
| Control | 6011 | LRRRC8C<br>protein                                                                                                                                                                                                                                                                                                  | gi 1487452<br>86,gi 14964<br>2813 | 92,305.20  | 100.00% | 6 | 8 | 9     | 0.07% | 10.20%                   | IEHFISIL<br>GK                  | 3.74     | 1,156.67 |
| Control | 6011 | LRRRC8C<br>protein                                                                                                                                                                                                                                                                                                  | gi 1487452<br>86,gi 14964<br>2813 | 92,305.20  | 100.00% | 6 | 8 | 9     | 0.07% | 10.20%                   | IPQAVV<br>DVSSHL<br>QK          | 4.84     | 1,520.84 |
| Control | 6011 | LRRRC8C<br>protein                                                                                                                                                                                                                                                                                                  | gi 1487452<br>86,gi 14964<br>2813 | 92,305.20  | 100.00% | 6 | 8 | 9     | 0.07% | 10.20%                   | NLEELY<br>LVGSL<br>HDIR         | 2.8      | 1,945.00 |
| Control | 6011 | LRRRC8C<br>protein                                                                                                                                                                                                                                                                                                  | gi 1487452<br>86,gi 14964<br>2813 | 92,305.20  | 100.00% | 6 | 8 | 9     | 0.07% | 10.20%                   | QFSEQQ<br>PAFR                  | 2.71     | 1,237.60 |
| Control | 6011 | LRRRC8C<br>protein                                                                                                                                                                                                                                                                                                  | gi 1487452<br>86,gi 14964<br>2813 | 92,305.20  | 100.00% | 6 | 8 | 9     | 0.07% | 10.20%                   | SIEEIVSF<br>QHLLR               | 3.75     | 1,457.77 |
| Control | 6011 | LRRRC8C<br>protein                                                                                                                                                                                                                                                                                                  | gi 1487452<br>86,gi 14964<br>2813 | 92,305.20  | 100.00% | 6 | 8 | 9     | 0.07% | 10.20%                   | SNTTQS<br>GPEGSL<br>VNSQSL<br>K | 3.82     | 1,933.95 |
| Control | 6011 | PREDIC<br>TED:<br>similar to<br>MYB<br>binding<br>protein<br>1a                                                                                                                                                                                                                                                     | gi 1199117<br>77                  | 151,796.60 | 100.00% | 4 | 5 | 5     | 0.04% | 4.22%                    | LLGAAL<br>PLLSK                 | 3.08     | 1,095.71 |
| Control | 6011 | PREDIC<br>TED:<br>similar to<br>MYB<br>binding<br>protein<br>1a                                                                                                                                                                                                                                                     | gi 1199117<br>77                  | 151,796.60 | 100.00% | 4 | 5 | 5     | 0.04% | 4.22%                    | LMGPVN<br>LFSDENI<br>PR         | 3.82     | 1,717.86 |
| Control | 6011 | PREDIC<br>TED:<br>similar to<br>MYB<br>binding<br>protein<br>1a                                                                                                                                                                                                                                                     | gi 1199117<br>77                  | 151,796.60 | 100.00% | 4 | 5 | 5     | 0.04% | 4.22%                    | QPENPL<br>VLELLEP<br>LLL VIR    | 4.51     | 2,198.32 |



|         |      |                                                                                                                                                                              |                                      |            |         |   |   |   |       |        |                                          |          |
|---------|------|------------------------------------------------------------------------------------------------------------------------------------------------------------------------------|--------------------------------------|------------|---------|---|---|---|-------|--------|------------------------------------------|----------|
| Control | 6011 | PREDICTED:<br>similar to MYB binding protein 1a                                                                                                                              | gi 119911777                         | 151,796.60 | 100.00% | 4 | 5 | 5 | 0.04% | 4.22%  | TAGDRV 3.3<br>ETLYAR                     | 1,351.70 |
| Control | 6011 | MGAT1 protein                                                                                                                                                                | gi 154426138,gi 59858237,gi 62751783 | 51,684.70  | 100.00% | 5 | 5 | 5 | 0.04% | 14.10% | GIVSFLY 2.82<br>R                        | 954.5407 |
| Control | 6011 | MGAT1 protein                                                                                                                                                                | gi 154426138,gi 59858237,gi 62751783 | 51,684.70  | 100.00% | 5 | 5 | 5 | 0.04% | 14.10% | LAQDAE 3.43<br>VELER                     | 1,272.64 |
| Control | 6011 | MGAT1 protein                                                                                                                                                                | gi 154426138,gi 59858237,gi 62751783 | 51,684.70  | 100.00% | 5 | 5 | 5 | 0.04% | 14.10% | LNQHFV 4.42<br>PFTQLDL<br>SYLR           | 2,091.10 |
| Control | 6011 | MGAT1 protein                                                                                                                                                                | gi 154426138,gi 59858237,gi 62751783 | 51,684.70  | 100.00% | 5 | 5 | 5 | 0.04% | 14.10% | LPSDSAL 5.09<br>DDDPAS<br>LTR            | 1,672.80 |
| Control | 6011 | MGAT1 protein                                                                                                                                                                | gi 154426138,gi 59858237,gi 62751783 | 51,684.70  | 100.00% | 5 | 5 | 5 | 0.04% | 14.10% | VYGAPL 2.74<br>LQVEK                     | 1,216.69 |
| Control | 6011 | ribosomal protein S14                                                                                                                                                        | gi 118150778,gi 28189929,gi 74268249 | 15,659.00  | 99.80%  | 2 | 2 | 2 | 0.02% | 15.90% | ADRDES 3.02<br>SPYAAM<br>LAAQDV<br>AQR   | 2,281.05 |
| Control | 6011 | ribosomal protein S14                                                                                                                                                        | gi 118150778,gi 28189929,gi 74268249 | 15,659.00  | 99.80%  | 2 | 2 | 2 | 0.02% | 15.90% | VKADRD 2.73<br>ESSPYA<br>AMLAAQ<br>DVAQR | 2,508.21 |
| Control | 6011 | RecName : Full=Transitional endoplasmic reticulum ATPase; Short=TER ATPase; AltName: Full=15S Mg(2+)-ATPase p97 subunit; AltName: Full=Valosin-containing protein; Short=VCP | gi 122140828,gi 73586667,gi 77735541 | 89,314.70  | 100.00% | 3 | 3 | 3 | 0.02% | 5.21%  | GILLYGP 2.46<br>PGTGK                    | 1,172.67 |

|         |      |                                                                                                                                                                                                                                                                                                   |           |         |   |   |   |       |       |                                |          |
|---------|------|---------------------------------------------------------------------------------------------------------------------------------------------------------------------------------------------------------------------------------------------------------------------------------------------------|-----------|---------|---|---|---|-------|-------|--------------------------------|----------|
| Control | 6011 | RecName gi 1221408 :<br>28_gi 73586<br>Full=Tra 667_gi 7773<br>nsitional 5541<br>endoplas<br>mic<br>reticulum<br>ATPase;<br>Short=TE<br>R<br>ATPase;<br>AltName:<br>Full=15S<br>Mg(2+)-<br>ATPase<br>p97<br>subunit;<br>AltName:<br>Full=Val<br>osin-<br>containin<br>g protein;<br>Short=V<br>CP | 89,314.70 | 100.00% | 3 | 3 | 3 | 0.02% | 5.21% | LDQLIYI 3.41<br>PLPDEK         | 1,556.86 |
| Control | 6011 | RecName gi 1221408 :<br>28_gi 73586<br>Full=Tra 667_gi 7773<br>nsitional 5541<br>endoplas<br>mic<br>reticulum<br>ATPase;<br>Short=TE<br>R<br>ATPase;<br>AltName:<br>Full=15S<br>Mg(2+)-<br>ATPase<br>p97<br>subunit;<br>AltName:<br>Full=Val<br>osin-<br>containin<br>g protein;<br>Short=V<br>CP | 89,314.70 | 100.00% | 3 | 3 | 3 | 0.02% | 5.21% | NAPAIIFI 2.39<br>DELDAIA<br>PK | 1,811.00 |

|         |      |                                                                                                                                                                 |            |           |         |   |   |   |       |       |                    |      |          |
|---------|------|-----------------------------------------------------------------------------------------------------------------------------------------------------------------|------------|-----------|---------|---|---|---|-------|-------|--------------------|------|----------|
| Control | 6011 | PREDIC TED: 02<br>similar to Thioredoxin domain- containin g protein 5 precursor (Thioredoxin-like protein p46) (Endoplasmic reticulum protein ERp46) isoform 1 | gi 1199159 | 45,792.10 | 100.00% | 3 | 3 | 5 | 0.04% | 8.37% | FFKPGQ EAVK        | 2.98 | 1,150.63 |
| Control | 6011 | PREDIC TED: 02<br>similar to Thioredoxin domain- containin g protein 5 precursor (Thioredoxin-like protein p46) (Endoplasmic reticulum protein ERp46) isoform 1 | gi 1199159 | 45,792.10 | 100.00% | 3 | 3 | 5 | 0.04% | 8.37% | GYPTLL LFR         | 2.31 | 1,079.62 |
| Control | 6011 | PREDIC TED: 02<br>similar to Thioredoxin domain- containin g protein 5 precursor (Thioredoxin-like protein p46) (Endoplasmic reticulum protein ERp46) isoform 1 | gi 1199159 | 45,792.10 | 100.00% | 3 | 3 | 5 | 0.04% | 8.37% | VDCTQH YELCSG NQVR | 3.8  | 1,851.81 |



|         |      |                                                                                                                                                                                                                                             |                                                  |           |         |   |   |    |       |        |                                      |      |          |
|---------|------|---------------------------------------------------------------------------------------------------------------------------------------------------------------------------------------------------------------------------------------------|--------------------------------------------------|-----------|---------|---|---|----|-------|--------|--------------------------------------|------|----------|
| Control | 6011 | RecName<br>:<br>Full=Tra<br>nslocon-<br>associate<br>d protein<br>subunit<br>delta;<br>Short=T<br>RAP-<br>delta;<br>AltName:<br>Full=Sig<br>nal<br>sequence<br>receptor<br>subunit<br>delta;<br>Short=SS<br>R-delta;<br>Flags:<br>Precursor | gi 1221371<br>13,gi 83638<br>548,gi 8437<br>0035 | 18,796.20 | 100.00% | 4 | 6 | 17 | 0.13% | 25.60% | NNEDVS<br>VIPPLFT<br>VSVDRH          | 4.9  | 2,138.09 |
| Control | 6011 | RecName<br>:<br>Full=Tra<br>nslocon-<br>associate<br>d protein<br>subunit<br>delta;<br>Short=T<br>RAP-<br>delta;<br>AltName:<br>Full=Sig<br>nal<br>sequence<br>receptor<br>subunit<br>delta;<br>Short=SS<br>R-delta;<br>Flags:<br>Precursor | gi 1221371<br>13,gi 83638<br>548,gi 8437<br>0035 | 18,796.20 | 100.00% | 4 | 6 | 17 | 0.13% | 25.60% | VQNMAL<br>YADVSG<br>K                | 4.43 | 1,411.69 |
| Control | 6011 | Transme<br>mbrane<br>protein<br>30A                                                                                                                                                                                                         | gi 1096584<br>58,gi 11549<br>7784                | 40,667.50 | 99.80%  | 2 | 2 | 2  | 0.02% | 6.93%  | FRNPPG<br>TDPLEE<br>R                | 3.43 | 1,527.76 |
| Control | 6011 | Transme<br>mbrane<br>protein<br>30A                                                                                                                                                                                                         | gi 1096584<br>58,gi 11549<br>7784                | 40,667.50 | 99.80%  | 2 | 2 | 2  | 0.02% | 6.93%  | KNDLHP<br>TLPAGR                     | 3.26 | 1,318.72 |
| Control | 6011 | Transloca<br>se of<br>outer<br>mitochon<br>drial<br>membran<br>e 70<br>homolog<br>A (S.<br>cerevisiae<br>)                                                                                                                                  | gi 1153050<br>42,gi 11549<br>6634                | 67,553.40 | 100.00% | 4 | 5 | 5  | 0.04% | 10.80% | ASPAPGS<br>GHPDGP<br>GTHLEM<br>NSLDR | 2.33 | 2,416.10 |

|         |      |                                                                                       |                                                  |           |         |   |   |   |       |        |                           |      |          |
|---------|------|---------------------------------------------------------------------------------------|--------------------------------------------------|-----------|---------|---|---|---|-------|--------|---------------------------|------|----------|
| Control | 6011 | Translocase of outer mitochondrial membrane 70 homolog A (S. cerevisiae)              | gi 115305042,gi 115496634                        | 67,553.40 | 100.00% | 4 | 5 | 5 | 0.04% | 10.80% | LRPESAL<br>AQAQK          | 3.36 | 1,311.74 |
| Control | 6011 | Translocase of outer mitochondrial membrane 70 homolog A (S. cerevisiae)              | gi 115305042,gi 115496634                        | 67,553.40 | 100.00% | 4 | 5 | 5 | 0.04% | 10.80% | NREPLM<br>PSPQFIK         | 3.76 | 1,572.82 |
| Control | 6011 | Translocase of outer mitochondrial membrane 70 homolog A (S. cerevisiae)              | gi 115305042,gi 115496634                        | 67,553.40 | 100.00% | 4 | 5 | 5 | 0.04% | 10.80% | SYFSSFT<br>DDIISQP<br>MLK | 2.88 | 1,994.94 |
| Control | 6011 | RecName: Full=Elongation factor 1-gamma; Short=EF-1-gamma; AltName: Full=eEF-1B gamma | gi 122146155,gi 74268360,gi 94966781,gi 95769122 | 50,360.80 | 99.80%  | 2 | 2 | 2 | 0.02% | 4.55%  | AKDPFA<br>HLPK            | 2.37 | 1,123.63 |
| Control | 6011 | RecName: Full=Elongation factor 1-gamma; Short=EF-1-gamma; AltName: Full=eEF-1B gamma | gi 122146155,gi 74268360,gi 94966781,gi 95769122 | 50,360.80 | 99.80%  | 2 | 2 | 2 | 0.02% | 4.55%  | ILGLLDA<br>HLK            | 2.97 | 1,092.68 |
| Control | 6011 | lysosomal associated membrane protein 2 isoform 1                                     | gi 164420738,gi 74353978,gi 77736087             | 44,524.90 | 100.00% | 3 | 3 | 7 | 0.05% | 5.16%  | IPLNDIF<br>R              | 3.11 | 987.5623 |

|         |      |                                                                                                                                                                                                          |                                                                                                                  |           |         |   |   |   |       |        |                                                 |      |          |
|---------|------|----------------------------------------------------------------------------------------------------------------------------------------------------------------------------------------------------------|------------------------------------------------------------------------------------------------------------------|-----------|---------|---|---|---|-------|--------|-------------------------------------------------|------|----------|
| Control | 6011 | lysosomal<br>l-<br>associate<br>d<br>membran<br>e protein<br>2 isoform<br>1                                                                                                                              | gi 1644207<br>38,gi 74353<br>978,gi 7773<br>6087                                                                 | 44,524.90 | 100.00% | 3 | 3 | 7 | 0.05% | 5.16%  | VALKIPL<br>NDIFR                                | 3.74 | 1,398.85 |
| Control | 6011 | lysosomal<br>l-<br>associate<br>d<br>membran<br>e protein<br>2 isoform<br>1                                                                                                                              | gi 1644207<br>38,gi 74353<br>978,gi 7773<br>6087                                                                 | 44,524.90 | 100.00% | 3 | 3 | 7 | 0.05% | 5.16%  | YLDFVF<br>AVK                                   | 2.44 | 1,101.60 |
| Control | 6011 | syndecan<br>binding<br>protein<br>(syntenin<br>)                                                                                                                                                         | gi 1154975<br>76,gi 14623<br>1800,gi 742<br>67862                                                                | 32,372.10 | 100.00% | 3 | 4 | 5 | 0.04% | 18.10% | DSQIADI<br>LSTAGNI<br>VTITIMP<br>AFIFEHII<br>K  | 2.98 | 3,287.76 |
| Control | 6011 | syndecan<br>binding<br>protein<br>(syntenin<br>)                                                                                                                                                         | gi 1154975<br>76,gi 14623<br>1800,gi 742<br>67862                                                                | 32,372.10 | 100.00% | 3 | 4 | 5 | 0.04% | 18.10% | DSQIADI<br>LSTAGNI<br>VTITIMP<br>AFIFEHII<br>KR | 3.34 | 3,443.86 |
| Control | 6011 | syndecan<br>binding<br>protein<br>(syntenin<br>)                                                                                                                                                         | gi 1154975<br>76,gi 14623<br>1800,gi 742<br>67862                                                                | 32,372.10 | 100.00% | 3 | 4 | 5 | 0.04% | 18.10% | SIDNGIF<br>VQLVQA<br>NSPSSLV<br>GLR             | 4.61 | 2,414.30 |
| Control | 6011 | Nicastrin                                                                                                                                                                                                | gi 7426760<br>0,gi 777359<br>01                                                                                  | 79,055.00 | 99.80%  | 2 | 2 | 3 | 0.02% | 2.65%  | ALAGVA<br>TVLAR                                 | 3.02 | 1,041.64 |
| Control | 6011 | Nicastrin                                                                                                                                                                                                | gi 7426760<br>0,gi 777359<br>01                                                                                  | 79,055.00 | 99.80%  | 2 | 2 | 3 | 0.02% | 2.65%  | LLYGFL<br>VR                                    | 2.27 | 980.5928 |
| Control | 6011 | RecName<br>:<br>Full=AT<br>P<br>synthase<br>subunit<br>O,<br>mitochon<br>drial;<br>AltName:<br>Full=Olig<br>omycin<br>sensitivit<br>y<br>conferral<br>protein;<br>Short=O<br>SCP;<br>Flags:<br>Precursor | gi 1438113<br>65,gi 15788<br>1386,gi 159<br>164706,gi 1<br>63451,gi 27<br>806307,gi 2<br>8189911,gi <br>74268299 | 13,204.80 | 100.00% | 4 | 5 | 6 | 0.05% | 36.70% | EKFSPLT<br>SNLINLL<br>AENGR                     | 3.47 | 2,116.14 |

|         |      |                                                                                                                                                                                                          |                                                                                                                  |           |         |   |   |   |       |        |                                |          |
|---------|------|----------------------------------------------------------------------------------------------------------------------------------------------------------------------------------------------------------|------------------------------------------------------------------------------------------------------------------|-----------|---------|---|---|---|-------|--------|--------------------------------|----------|
| Control | 6011 | RecName<br>:<br>Full=AT<br>P<br>synthase<br>subunit<br>O,<br>mitochon<br>drial;<br>AltName:<br>Full=Olig<br>omycin<br>sensitivit<br>y<br>conferral<br>protein;<br>Short=O<br>SCP;<br>Flags:<br>Precursor | gi 1438113<br>65,gi 15788<br>1386,gi 159<br>164706,gi 1<br>63451,gi 27<br>806307,gi 2<br>8189911,gi <br>74268299 | 13,204.80 | 100.00% | 4 | 5 | 6 | 0.05% | 36.70% | FSPLTSN 3.18<br>LINLLAE<br>NGR | 1,859.00 |
| Control | 6011 | RecName<br>:<br>Full=AT<br>P<br>synthase<br>subunit<br>O,<br>mitochon<br>drial;<br>AltName:<br>Full=Olig<br>omycin<br>sensitivit<br>y<br>conferral<br>protein;<br>Short=O<br>SCP;<br>Flags:<br>Precursor | gi 1438113<br>65,gi 15788<br>1386,gi 159<br>164706,gi 1<br>63451,gi 27<br>806307,gi 2<br>8189911,gi <br>74268299 | 13,204.80 | 100.00% | 4 | 5 | 6 | 0.05% | 36.70% | LVRPPV 3.3<br>QIYGIEG<br>R     | 1,596.92 |
| Control | 6011 | RecName<br>:<br>Full=AT<br>P<br>synthase<br>subunit<br>O,<br>mitochon<br>drial;<br>AltName:<br>Full=Olig<br>omycin<br>sensitivit<br>y<br>conferral<br>protein;<br>Short=O<br>SCP;<br>Flags:<br>Precursor | gi 1438113<br>65,gi 15788<br>1386,gi 159<br>164706,gi 1<br>63451,gi 27<br>806307,gi 2<br>8189911,gi <br>74268299 | 13,204.80 | 100.00% | 4 | 5 | 6 | 0.05% | 36.70% | YATALY 2.69<br>SAASK           | 1,145.58 |
| Control | 6011 | G-protein<br>gamma-<br>12<br>subunit                                                                                                                                                                     | gi 1109682,<br>gi 1487439<br>56,gi 15866<br>81,gi 24949<br>18,gi 27807<br>509                                    | 8,039.60  | 99.80%  | 2 | 2 | 2 | 0.02% | 26.40% | NDPLLM 4.13<br>GIPTSEN<br>PFK  | 1,788.88 |



|         |      |                                                            |                                                                               |            |         |    |    |    |       |        |                                       |          |
|---------|------|------------------------------------------------------------|-------------------------------------------------------------------------------|------------|---------|----|----|----|-------|--------|---------------------------------------|----------|
| Control | 6011 | G-protein<br>gamma-<br>12<br>subunit                       | gi 1109682,<br>gi 1487439<br>56,gi 15866<br>81,gi 24949<br>18,gi 27807<br>509 | 8,039.60   | 99.80%  | 2  | 2  | 2  | 0.02% | 26.40% | NDPLLM 2.76<br>GIPTSEN<br>PFKDKK      | 2,160.10 |
| Control | 6011 | PGRMC<br>2 protein                                         | gi 1487449<br>19,gi 14964<br>2895                                             | 23,693.20  | 100.00% | 4  | 5  | 10 | 0.08% | 18.80% | DFSLEQL 2.41<br>R                     | 1,007.52 |
| Control | 6011 | PGRMC<br>2 protein                                         | gi 1487449<br>19,gi 14964<br>2895                                             | 23,693.20  | 100.00% | 4  | 5  | 10 | 0.08% | 18.80% | FYGPAG 3.49<br>PYGIFAG<br>R           | 1,472.73 |
| Control | 6011 | PGRMC<br>2 protein                                         | gi 1487449<br>19,gi 14964<br>2895                                             | 23,693.20  | 100.00% | 4  | 5  | 10 | 0.08% | 18.80% | GLGAGA 4.74<br>GAGEES<br>PAASLPR      | 1,667.83 |
| Control | 6011 | PGRMC<br>2 protein                                         | gi 1487449<br>19,gi 14964<br>2895                                             | 23,693.20  | 100.00% | 4  | 5  | 10 | 0.08% | 18.80% | RGLGAG 4.3<br>AGAGEE<br>SPAASLP<br>R  | 1,823.94 |
| Control | 6011 | TXNDC1<br>3 protein                                        | gi 1488784<br>48,gi 14964<br>2897                                             | 38,865.40  | 100.00% | 3  | 4  | 4  | 0.03% | 12.10% | FFVTTLF 2.61<br>AFFHAK                | 1,525.82 |
| Control | 6011 | TXNDC1<br>3 protein                                        | gi 1488784<br>48,gi 14964<br>2897                                             | 38,865.40  | 100.00% | 3  | 4  | 4  | 0.03% | 12.10% | VDVIQEP 4.47<br>GLSGR                 | 1,269.68 |
| Control | 6011 | TXNDC1<br>3 protein                                        | gi 1488784<br>48,gi 14964<br>2897                                             | 38,865.40  | 100.00% | 3  | 4  | 4  | 0.03% | 12.10% | YRPGV 5.57<br>YEDLQN<br>YILEK         | 2,057.03 |
| Control | 6011 | PREDIC<br>TED:<br>similar to<br>myoferlin<br>isoform<br>12 | gi 1946789<br>41                                                              | 234,648.00 | 100.00% | 28 | 34 | 46 | 0.36% | 20.00% | AEDIPQ 2.13<br>MDDAFS<br>QTVK         | 1,810.82 |
| Control | 6011 | PREDIC<br>TED:<br>similar to<br>myoferlin<br>isoform<br>12 | gi 1946789<br>41                                                              | 234,648.00 | 100.00% | 28 | 34 | 46 | 0.36% | 20.00% | ALSQIHE 1.63<br>AAVR                  | 1,194.66 |
| Control | 6011 | PREDIC<br>TED:<br>similar to<br>myoferlin<br>isoform<br>12 | gi 1946789<br>41                                                              | 234,648.00 | 100.00% | 28 | 34 | 46 | 0.36% | 20.00% | DNDSDD 3.09<br>VESNLL<br>LPAGIAL<br>R | 2,127.06 |
| Control | 6011 | PREDIC<br>TED:<br>similar to<br>myoferlin<br>isoform<br>12 | gi 1946789<br>41                                                              | 234,648.00 | 100.00% | 28 | 34 | 46 | 0.36% | 20.00% | DNYIPNT 3.04<br>LNPVFG<br>R           | 1,619.82 |
| Control | 6011 | PREDIC<br>TED:<br>similar to<br>myoferlin<br>isoform<br>12 | gi 1946789<br>41                                                              | 234,648.00 | 100.00% | 28 | 34 | 46 | 0.36% | 20.00% | DQLKPT 4.85<br>QLLQNV<br>AR           | 1,623.92 |
| Control | 6011 | PREDIC<br>TED:<br>similar to<br>myoferlin<br>isoform<br>12 | gi 1946789<br>41                                                              | 234,648.00 | 100.00% | 28 | 34 | 46 | 0.36% | 20.00% | FGKPDPI 4.94<br>VSVIFKD<br>EK         | 1,819.00 |

|         |      |                                                   |            |            |         |    |    |    |       |        |                                               |      |          |
|---------|------|---------------------------------------------------|------------|------------|---------|----|----|----|-------|--------|-----------------------------------------------|------|----------|
| Control | 6011 | PREDIC TED: 41<br>similar to myoferlin isoform 12 | gi 1946789 | 234,648.00 | 100.00% | 28 | 34 | 46 | 0.36% | 20.00% | FKGFPPP<br>VLSEDG<br>SSIR                     | 5.52 | 1,832.95 |
| Control | 6011 | PREDIC TED: 41<br>similar to myoferlin isoform 12 | gi 1946789 | 234,648.00 | 100.00% | 28 | 34 | 46 | 0.36% | 20.00% | GKSDEN<br>EDPSVV<br>GEFK                      | 3.72 | 1,736.80 |
| Control | 6011 | PREDIC TED: 41<br>similar to myoferlin isoform 12 | gi 1946789 | 234,648.00 | 100.00% | 28 | 34 | 46 | 0.36% | 20.00% | GNNPFF<br>DELFFY<br>NVHLTP<br>SELMDEI<br>ISIR | 5.65 | 3,473.67 |
| Control | 6011 | PREDIC TED: 41<br>similar to myoferlin isoform 12 | gi 1946789 | 234,648.00 | 100.00% | 28 | 34 | 46 | 0.36% | 20.00% | IDVGFV<br>YDEPGH<br>AVMR                      | 3.89 | 1,820.86 |
| Control | 6011 | PREDIC TED: 41<br>similar to myoferlin isoform 12 | gi 1946789 | 234,648.00 | 100.00% | 28 | 34 | 46 | 0.36% | 20.00% | ILHQHLG<br>PPEER                              | 3.04 | 1,425.76 |
| Control | 6011 | PREDIC TED: 41<br>similar to myoferlin isoform 12 | gi 1946789 | 234,648.00 | 100.00% | 28 | 34 | 46 | 0.36% | 20.00% | ILVELST<br>LLEK                               | 3.94 | 1,257.77 |
| Control | 6011 | PREDIC TED: 41<br>similar to myoferlin isoform 12 | gi 1946789 | 234,648.00 | 100.00% | 28 | 34 | 46 | 0.36% | 20.00% | IPAHQVL<br>YSTSGG<br>DASGK                    | 5.44 | 1,787.89 |
| Control | 6011 | PREDIC TED: 41<br>similar to myoferlin isoform 12 | gi 1946789 | 234,648.00 | 100.00% | 28 | 34 | 46 | 0.36% | 20.00% | ISVYDY<br>DTFTR                               | 2.65 | 1,379.65 |
| Control | 6011 | PREDIC TED: 41<br>similar to myoferlin isoform 12 | gi 1946789 | 234,648.00 | 100.00% | 28 | 34 | 46 | 0.36% | 20.00% | IYRAEDI<br>PQMDDA<br>FSQTVK                   | 4.23 | 2,243.07 |
| Control | 6011 | PREDIC TED: 41<br>similar to myoferlin isoform 12 | gi 1946789 | 234,648.00 | 100.00% | 28 | 34 | 46 | 0.36% | 20.00% | KMAPSE<br>THGAAA<br>IFK                       | 2.79 | 1,574.80 |
| Control | 6011 | PREDIC TED: 41<br>similar to myoferlin isoform 12 | gi 1946789 | 234,648.00 | 100.00% | 28 | 34 | 46 | 0.36% | 20.00% | LDAVNT<br>LLVMAE<br>R                         | 3.27 | 1,460.78 |

|         |      |                                                   |            |            |         |    |    |    |       |        |                                     |      |          |
|---------|------|---------------------------------------------------|------------|------------|---------|----|----|----|-------|--------|-------------------------------------|------|----------|
| Control | 6011 | PREDIC TED: 41<br>similar to myoferlin isoform 12 | gi 1946789 | 234,648.00 | 100.00% | 28 | 34 | 46 | 0.36% | 20.00% | NDVVGT<br>TYLHLS<br>K               | 3.84 | 1,446.76 |
| Control | 6011 | PREDIC TED: 41<br>similar to myoferlin isoform 12 | gi 1946789 | 234,648.00 | 100.00% | 28 | 34 | 46 | 0.36% | 20.00% | NLGPPG<br>PPFNITP<br>R              | 3.16 | 1,476.80 |
| Control | 6011 | PREDIC TED: 41<br>similar to myoferlin isoform 12 | gi 1946789 | 234,648.00 | 100.00% | 28 | 34 | 46 | 0.36% | 20.00% | NLVDPF<br>VEVSFA<br>GK              | 3.6  | 1,521.79 |
| Control | 6011 | PREDIC TED: 41<br>similar to myoferlin isoform 12 | gi 1946789 | 234,648.00 | 100.00% | 28 | 34 | 46 | 0.36% | 20.00% | SLLTEA<br>DAGHTE<br>FTDEVY<br>QNESR | 6.42 | 2,612.17 |
| Control | 6011 | PREDIC TED: 41<br>similar to myoferlin isoform 12 | gi 1946789 | 234,648.00 | 100.00% | 28 | 34 | 46 | 0.36% | 20.00% | TLHSSFQ<br>PNISQGR                  | 4.05 | 1,571.79 |
| Control | 6011 | PREDIC TED: 41<br>similar to myoferlin isoform 12 | gi 1946789 | 234,648.00 | 100.00% | 28 | 34 | 46 | 0.36% | 20.00% | TQGLVP<br>EHVETR                    | 2.57 | 1,365.71 |
| Control | 6011 | PREDIC TED: 41<br>similar to myoferlin isoform 12 | gi 1946789 | 234,648.00 | 100.00% | 28 | 34 | 46 | 0.36% | 20.00% | VFLPKEE<br>LYMPPL<br>VIK            | 2.8  | 1,932.09 |
| Control | 6011 | PREDIC TED: 41<br>similar to myoferlin isoform 12 | gi 1946789 | 234,648.00 | 100.00% | 28 | 34 | 46 | 0.36% | 20.00% | VIEDRD<br>NYIPNTL<br>NPVFGR         | 3.9  | 2,232.14 |
| Control | 6011 | PREDIC TED: 41<br>similar to myoferlin isoform 12 | gi 1946789 | 234,648.00 | 100.00% | 28 | 34 | 46 | 0.36% | 20.00% | VIIEFLD<br>NDQVGK<br>DEFLGR         | 5.49 | 2,207.13 |
| Control | 6011 | PREDIC TED: 41<br>similar to myoferlin isoform 12 | gi 1946789 | 234,648.00 | 100.00% | 28 | 34 | 46 | 0.36% | 20.00% | VIVESAS<br>NIPK                     | 3.5  | 1,156.66 |
| Control | 6011 | PREDIC TED: 41<br>similar to myoferlin isoform 12 | gi 1946789 | 234,648.00 | 100.00% | 28 | 34 | 46 | 0.36% | 20.00% | VSMFVL<br>GTGDEP<br>PPEKQD<br>R     | 3.33 | 2,118.02 |

|         |      |                                                                                                                                                                                                             |                                        |            |         |   |   |   |       |        |                                              |      |          |
|---------|------|-------------------------------------------------------------------------------------------------------------------------------------------------------------------------------------------------------------|----------------------------------------|------------|---------|---|---|---|-------|--------|----------------------------------------------|------|----------|
| Control | 6011 | OCIA domain containin g 1                                                                                                                                                                                   | gi 5985850 9,gi 627518 43,gi 75040 205 | 27,811.90  | 100.00% | 4 | 5 | 7 | 0.05% | 24.30% | ADFREP<br>NAEVPR<br>PIPHIGA<br>DYIPTEE<br>ER | 3.62 | 3,218.59 |
| Control | 6011 | OCIA domain containin g 1                                                                                                                                                                                   | gi 5985850 9,gi 627518 43,gi 75040 205 | 27,811.90  | 100.00% | 4 | 5 | 7 | 0.05% | 24.30% | FKNLEN<br>SPLGEAL<br>R                       | 3.28 | 1,587.85 |
| Control | 6011 | OCIA domain containin g 1                                                                                                                                                                                   | gi 5985850 9,gi 627518 43,gi 75040 205 | 27,811.90  | 100.00% | 4 | 5 | 7 | 0.05% | 24.30% | NLENSPL<br>GEALR                             | 2.53 | 1,312.69 |
| Control | 6011 | OCIA domain containin g 1                                                                                                                                                                                   | gi 5985850 9,gi 627518 43,gi 75040 205 | 27,811.90  | 100.00% | 4 | 5 | 7 | 0.05% | 24.30% | SVPLAA<br>TSMLITQ<br>GLISK                   | 2.79 | 1,846.04 |
| Control | 6011 | RecName :<br>Full=Myosin-10;<br>AltName:<br>Full=Myosin heavy chain 10;<br>AltName:<br>Full=Myosin heavy chain, non-muscle IIb;<br>AltName:<br>Full=Non-muscle myosin heavy chain IIb;<br>Short=NMMHC II-b; | gi 1343170 6,gi 278073 25,gi 41157 48  | 229,087.40 | 99.80%  | 2 | 2 | 2 | 0.02% | 2.58%  | KFDQLL<br>AEEK                               | 3.08 | 1,220.65 |
| Control | 6011 | RecName :<br>Full=Myosin-10;<br>AltName:<br>Full=Myosin heavy chain 10;<br>AltName:<br>Full=Myosin heavy chain, non-muscle IIb;<br>AltName:<br>Full=Non-muscle myosin heavy chain IIb;<br>Short=NMMHC II-b; | gi 1343170 6,gi 278073 25,gi 41157 48  | 229,087.40 | 99.80%  | 2 | 2 | 2 | 0.02% | 2.58%  | LDPHLV<br>LDQLR                              | 3.05 | 1,318.75 |

|         |      |                                                                                                                                                                                                                                                                      |                                          |            |        |   |   |   |       |       |                               |          |
|---------|------|----------------------------------------------------------------------------------------------------------------------------------------------------------------------------------------------------------------------------------------------------------------------|------------------------------------------|------------|--------|---|---|---|-------|-------|-------------------------------|----------|
| Control | 6011 | RecName<br>:<br>Full=My<br>osin-10;<br>AltName:<br>Full=My<br>osin<br>heavy<br>chain 10;<br>AltName:<br>Full=My<br>osin<br>heavy<br>chain,<br>non-<br>muscle<br>IIb;<br>AltName:<br>Full=Non-<br>muscle<br>myosin<br>heavy<br>chain IIb;<br>Short=N<br>MMHC<br>II-b; | gi 1343170<br>6,gi 278073<br>25,gi 41157 | 229,087.40 | 99.80% | 2 | 2 | 2 | 0.02% | 2.58% | TQLEELE 3.8<br>DELQAT<br>EDAK | 1,961.92 |
| Control | 6011 | RecName<br>:<br>Full=My<br>osin-10;<br>AltName:<br>Full=My<br>osin<br>heavy<br>chain 10;<br>AltName:<br>Full=My<br>osin<br>heavy<br>chain,<br>non-<br>muscle<br>IIb;<br>AltName:<br>Full=Non-<br>muscle<br>myosin<br>heavy<br>chain IIb;<br>Short=N<br>MMHC<br>II-b; | gi 1343170<br>6,gi 278073<br>25,gi 41157 | 229,087.40 | 99.80% | 2 | 2 | 2 | 0.02% | 2.58% | VIQYLA 2.11<br>HVASSH<br>K    | 1,452.80 |
| Control | 6011 | PREDIC<br>TED:<br>similar to<br>Interferon-<br>induced<br>protein<br>with<br>tetratrico<br>peptide<br>repeats 1<br>(IFIT-1)                                                                                                                                          | gi 1946789                               | 54,815.90  | 99.80% | 2 | 2 | 2 | 0.02% | 5.23% | LQDVEQ 4.16<br>EAEGEK         | 1,374.64 |

|         |      |                                                                                                   |                           |           |         |   |   |   |       |        |                                                        |      |          |
|---------|------|---------------------------------------------------------------------------------------------------|---------------------------|-----------|---------|---|---|---|-------|--------|--------------------------------------------------------|------|----------|
| Control | 6011 | PREDIC TED: 15<br>similar to Interferon-induced protein with tetratricopeptide repeats 1 (IFIT-1) | gi 1946789                | 54,815.90 | 99.80%  | 2 | 2 | 2 | 0.02% | 5.23%  | YNVGIY<br>NLLAYV<br>K                                  | 3.02 | 1,529.84 |
| Control | 6011 | RecName :<br>Full=Heterogeneo<br>us<br>nuclear ribonucleoprotein K;<br>Short=hnRNP K              | gi 1088607<br>77.gi 74354 | 51,003.40 | 100.00% | 6 | 6 | 7 | 0.05% | 20.70% | GSYGDL<br>GGPIITT<br>QVTIPK                            | 3.18 | 1,917.03 |
| Control | 6011 | RecName :<br>Full=Heterogeneo<br>us<br>nuclear ribonucleoprotein K;<br>Short=hnRNP K              | gi 1088607<br>77.gi 74354 | 51,003.40 | 100.00% | 6 | 6 | 7 | 0.05% | 20.70% | IDEPLEG<br>SEDRIITI<br>TGTQDQ<br>IQNAQY<br>LLQNSV<br>K | 5.7  | 3,829.95 |
| Control | 6011 | RecName :<br>Full=Heterogeneo<br>us<br>nuclear ribonucleoprotein K;<br>Short=hnRNP K              | gi 1088607<br>77.gi 74354 | 51,003.40 | 100.00% | 6 | 6 | 7 | 0.05% | 20.70% | IILDLISE<br>SPIK                                       | 3.58 | 1,340.80 |
| Control | 6011 | RecName :<br>Full=Heterogeneo<br>us<br>nuclear ribonucleoprotein K;<br>Short=hnRNP K              | gi 1088607<br>77.gi 74354 | 51,003.40 | 100.00% | 6 | 6 | 7 | 0.05% | 20.70% | IITITGTQ<br>DQIQNA<br>QYLLQN<br>SVK                    | 4.64 | 2,589.39 |
| Control | 6011 | RecName :<br>Full=Heterogeneo<br>us<br>nuclear ribonucleoprotein K;<br>Short=hnRNP K              | gi 1088607<br>77.gi 74354 | 51,003.40 | 100.00% | 6 | 6 | 7 | 0.05% | 20.70% | RPAEDM<br>EEEQAF<br>KR                                 | 3.13 | 1,751.80 |

|         |      |                                                                                                                              |                                                   |           |         |   |   |   |       |        |                                                         |      |          |
|---------|------|------------------------------------------------------------------------------------------------------------------------------|---------------------------------------------------|-----------|---------|---|---|---|-------|--------|---------------------------------------------------------|------|----------|
| Control | 6011 | RecName<br>:<br>Full=Het<br>erogeneo<br>us<br>nuclear<br>ribonucle<br>oprotein<br>K;<br>Short=hn<br>RNP K                    | gi 1088607<br>77,gi 74354<br>615,gi 7773<br>6071  | 51,003.40 | 100.00% | 6 | 6 | 7 | 0.05% | 20.70% | TDYNAS<br>VSPVDS<br>SGPER                               | 3.45 | 1,780.80 |
| Control | 6011 | CDP-<br>diacylgly<br>cerol--<br>inositol 3-<br>phosphati<br>dyltransfe<br>rase<br>(phosphat<br>idylinosit<br>ol<br>synthase) | gi 7435475<br>8,gi 777359<br>15                   | 23,580.50 | 99.80%  | 2 | 2 | 3 | 0.02% | 11.30% | MIDLSG<br>NPVLR                                         | 3.65 | 1,230.65 |
| Control | 6011 | CDP-<br>diacylgly<br>cerol--<br>inositol 3-<br>phosphati<br>dyltransfe<br>rase<br>(phosphat<br>idylinosit<br>ol<br>synthase) | gi 7435475<br>8,gi 777359<br>15                   | 23,580.50 | 99.80%  | 2 | 2 | 3 | 0.02% | 11.30% | SLISVIHL<br>ITAAR                                       | 3.92 | 1,393.85 |
| Control | 6011 | RecName<br>:<br>Full=Dna<br>J<br>homolog<br>subfamily<br>C<br>member<br>11                                                   | gi 1108081<br>98,gi 11405<br>0887,gi 847<br>08894 | 63,220.40 | 100.00% | 5 | 6 | 7 | 0.05% | 16.30% | GIRPGLT<br>TVLAR                                        | 3.37 | 1,253.77 |
| Control | 6011 | RecName<br>:<br>Full=Dna<br>J<br>homolog<br>subfamily<br>C<br>member<br>11                                                   | gi 1108081<br>98,gi 11405<br>0887,gi 847<br>08894 | 63,220.40 | 100.00% | 5 | 6 | 7 | 0.05% | 16.30% | GTISVGI<br>DATDLF<br>DRYEEE<br>YEDVSG<br>SGFPQIEI<br>NK | 5.46 | 3,893.82 |
| Control | 6011 | RecName<br>:<br>Full=Dna<br>J<br>homolog<br>subfamily<br>C<br>member<br>11                                                   | gi 1108081<br>98,gi 11405<br>0887,gi 847<br>08894 | 63,220.40 | 100.00% | 5 | 6 | 7 | 0.05% | 16.30% | GVLHQV<br>MALDSE<br>ALR                                 | 3.37 | 1,654.86 |
| Control | 6011 | RecName<br>:<br>Full=Dna<br>J<br>homolog<br>subfamily<br>C<br>member<br>11                                                   | gi 1108081<br>98,gi 11405<br>0887,gi 847<br>08894 | 63,220.40 | 100.00% | 5 | 6 | 7 | 0.05% | 16.30% | LFNLVH<br>QAYEVL<br>SDPQTR                              | 2.89 | 2,130.10 |

|         |      |                                                                            |                                                   |           |         |   |    |    |       |        |                                   |      |          |
|---------|------|----------------------------------------------------------------------------|---------------------------------------------------|-----------|---------|---|----|----|-------|--------|-----------------------------------|------|----------|
| Control | 6011 | RecName<br>:<br>Full=Dna<br>J<br>homolog<br>subfamily<br>C<br>member<br>11 | gi 1108081<br>98,gi 11405<br>0887,gi 847<br>08894 | 63,220.40 | 100.00% | 5 | 6  | 7  | 0.05% | 16.30% | TPAEIRE<br>EFER                   | 1.99 | 1,376.68 |
| Control | 6011 | vascular<br>endotheli<br>al<br>cadherin<br>precursor                       | gi 3430529<br>9,gi 486753<br>81,gi 75071<br>940   | 87,450.60 | 100.00% | 9 | 11 | 13 | 0.10% | 11.70% | KPLIGSV<br>LAK                    | 2.34 | 1,025.67 |
| Control | 6011 | vascular<br>endotheli<br>al<br>cadherin<br>precursor                       | gi 3430529<br>9,gi 486753<br>81,gi 75071<br>940   | 87,450.60 | 100.00% | 9 | 11 | 13 | 0.10% | 11.70% | KPLIGSV<br>LAKDPD<br>AAQR         | 3.95 | 1,779.01 |
| Control | 6011 | vascular<br>endotheli<br>al<br>cadherin<br>precursor                       | gi 3430529<br>9,gi 486753<br>81,gi 75071<br>940   | 87,450.60 | 100.00% | 9 | 11 | 13 | 0.10% | 11.70% | NLESPSS<br>FTIK                   | 2.5  | 1,222.63 |
| Control | 6011 | vascular<br>endotheli<br>al<br>cadherin<br>precursor                       | gi 3430529<br>9,gi 486753<br>81,gi 75071<br>940   | 87,450.60 | 100.00% | 9 | 11 | 13 | 0.10% | 11.70% | TSDKGQ<br>FFGITK                  | 2.55 | 1,328.68 |
| Control | 6011 | vascular<br>endotheli<br>al<br>cadherin<br>precursor                       | gi 3430529<br>9,gi 486753<br>81,gi 75071<br>940   | 87,450.60 | 100.00% | 9 | 11 | 13 | 0.10% | 11.70% | VDKNTG<br>DVYALE<br>R             | 4.5  | 1,479.74 |
| Control | 6011 | vascular<br>endotheli<br>al<br>cadherin<br>precursor                       | gi 3430529<br>9,gi 486753<br>81,gi 75071<br>940   | 87,450.60 | 100.00% | 9 | 11 | 13 | 0.10% | 11.70% | VGSP LG<br>SLFVEDP<br>DEPQNR      | 2.44 | 2,056.00 |
| Control | 6011 | vascular<br>endotheli<br>al<br>cadherin<br>precursor                       | gi 3430529<br>9,gi 486753<br>81,gi 75071<br>940   | 87,450.60 | 100.00% | 9 | 11 | 13 | 0.10% | 11.70% | VGSP LG<br>SLFVEDP<br>DEPQNR<br>K | 2.92 | 2,184.09 |
| Control | 6011 | vascular<br>endotheli<br>al<br>cadherin<br>precursor                       | gi 3430529<br>9,gi 486753<br>81,gi 75071<br>940   | 87,450.60 | 100.00% | 9 | 11 | 13 | 0.10% | 11.70% | YSFVQG<br>EYR                     | 2.66 | 1,148.54 |
| Control | 6011 | vascular<br>endotheli<br>al<br>cadherin<br>precursor                       | gi 3430529<br>9,gi 486753<br>81,gi 75071<br>940   | 87,450.60 | 100.00% | 9 | 11 | 13 | 0.10% | 11.70% | YTFSVPE<br>DIR                    | 2.73 | 1,226.61 |





|         |      |                                                                                                                                                                                                                                                                                       |                                                                                   |           |         |   |   |   |       |        |                                                      |      |          |
|---------|------|---------------------------------------------------------------------------------------------------------------------------------------------------------------------------------------------------------------------------------------------------------------------------------------|-----------------------------------------------------------------------------------|-----------|---------|---|---|---|-------|--------|------------------------------------------------------|------|----------|
| Control | 6011 | RecName<br>:<br>Full=Alp<br>ha-<br>enolase;<br>AltName:<br>Full=2-<br>phospho-<br>D-<br>glycerate<br>hydro-<br>lyase;<br>AltName:<br>Full=Non-<br>neural<br>enolase;<br>Short=N<br>NE;<br>AltName:<br>Full=Eno-<br>lase 1;<br>AltName:<br>Full=Pho-<br>sphopyru-<br>vate<br>hydratase | gi 1099400<br>77,gi 74354<br>056,gi 8719<br>6501                                  | 47,309.10 | 100.00% | 3 | 3 | 3 | 0.02% | 9.45%  | KLNVVE<br>QEKIDK                                     | 3.99 | 1,442.82 |
| Control | 6011 | EH-<br>domain<br>containin<br>g 1                                                                                                                                                                                                                                                     | gi 1103317<br>67,gi 15845<br>5084,gi 598<br>58079,gi 62<br>751751,gi 7<br>5070053 | 60,666.10 | 99.90%  | 2 | 2 | 2 | 0.02% | 10.30% | IGPEPTT<br>DSFIIV<br>MHGPTE<br>GVVPGN<br>ALVVDP<br>R | 3.66 | 3,288.66 |
| Control | 6011 | EH-<br>domain<br>containin<br>g 1                                                                                                                                                                                                                                                     | gi 1103317<br>67,gi 15845<br>5084,gi 598<br>58079,gi 62<br>751751,gi 7<br>5070053 | 60,666.10 | 99.90%  | 2 | 2 | 2 | 0.02% | 10.30% | LADVDR<br>DGLLDD<br>EEFALA<br>NHLIK                  | 2.41 | 2,582.31 |
| Control | 6011 | LOC515<br>309<br>protein                                                                                                                                                                                                                                                              | gi 1488784<br>60,gi 14977<br>3584                                                 | 31,548.40 | 100.00% | 3 | 4 | 4 | 0.03% | 15.20% | FAEVYF<br>AQSQQK                                     | 3.1  | 1,445.71 |
| Control | 6011 | LOC515<br>309<br>protein                                                                                                                                                                                                                                                              | gi 1488784<br>60,gi 14977<br>3584                                                 | 31,548.40 | 100.00% | 3 | 4 | 4 | 0.03% | 15.20% | KEEEEEEE<br>EEYDEG<br>SNLKR                          | 4.93 | 2,241.96 |
| Control | 6011 | LOC515<br>309<br>protein                                                                                                                                                                                                                                                              | gi 1488784<br>60,gi 14977<br>3584                                                 | 31,548.40 | 100.00% | 3 | 4 | 4 | 0.03% | 15.20% | SNPEDQI<br>LYQTER                                    | 3.37 | 1,592.76 |
| Control | 6011 | SCO<br>cytochro-<br>me<br>oxidase<br>deficient<br>homolog<br>1 (yeast)                                                                                                                                                                                                                | gi 1192239<br>14,gi 12269<br>2513,gi 134<br>035032                                | 33,641.50 | 99.80%  | 2 | 2 | 2 | 0.02% | 12.10% | LIGLTGT<br>KEEIDQ<br>VAR                             | 4.83 | 1,742.97 |
| Control | 6011 | SCO<br>cytochro-<br>me<br>oxidase<br>deficient<br>homolog<br>1 (yeast)                                                                                                                                                                                                                | gi 1192239<br>14,gi 12269<br>2513,gi 134<br>035032                                | 33,641.50 | 99.80%  | 2 | 2 | 2 | 0.02% | 12.10% | SIGKPLL<br>GGPFSLT<br>THTGEP<br>K                    | 3.66 | 2,137.17 |
| Control | 6011 | LMAN1<br>protein                                                                                                                                                                                                                                                                      | gi 1487440<br>96,gi 14977<br>3586                                                 | 58,038.50 | 100.00% | 3 | 3 | 3 | 0.02% | 10.60% | EKYQEE<br>FEHFQQ<br>ELDK                             | 2.71 | 2,126.97 |

|         |      |                                                            |                                       |           |         |   |   |   |       |        |                                              |      |          |
|---------|------|------------------------------------------------------------|---------------------------------------|-----------|---------|---|---|---|-------|--------|----------------------------------------------|------|----------|
| Control | 6011 | LMAN1 protein                                              | gi 148744096,gi 149773586             | 58,038.50 | 100.00% | 3 | 3 | 3 | 0.02% | 10.60% | GAGAPG<br>QQGQTF<br>QQELDT<br>VVNTQH<br>EILR | 2.75 | 3,022.50 |
| Control | 6011 | LMAN1 protein                                              | gi 148744096,gi 149773586             | 58,038.50 | 100.00% | 3 | 3 | 3 | 0.02% | 10.60% | YVSSLT<br>EEISK                              | 3.05 | 1,255.64 |
| Control | 6011 | PREDICTED: lamin B2                                        | gi 194668843                          | 70,532.10 | 100.00% | 3 | 3 | 3 | 0.02% | 12.30% | ETENGE<br>EGEDEA<br>AEFGEE<br>DLFHQQ<br>GDPR | 3.19 | 3,164.28 |
| Control | 6011 | PREDICTED: lamin B2                                        | gi 194668843                          | 70,532.10 | 100.00% | 3 | 3 | 3 | 0.02% | 12.30% | KLLEGE<br>EERLK                              | 2.99 | 1,343.75 |
| Control | 6011 | PREDICTED: lamin B2                                        | gi 194668843                          | 70,532.10 | 100.00% | 3 | 3 | 3 | 0.02% | 12.30% | LQEKEE<br>LRELND<br>R                        | 2.84 | 1,671.87 |
| Control | 6011 | PREDICTED: lamin B2                                        | gi 194668843                          | 70,532.10 | 100.00% | 3 | 3 | 3 | 0.02% | 12.30% | QVLEGE<br>EISYK                              | 2.78 | 1,294.65 |
| Control | 6011 | PREDICTED: lamin B2                                        | gi 194668843                          | 70,532.10 | 100.00% | 3 | 3 | 3 | 0.02% | 12.30% | TTLVNA<br>DGEEVA<br>MR                       | 3.09 | 1,521.72 |
| Control | 6011 | acyl-CoA synthetase long-chain family member 5             | gi 115497154,gi 152941112,gi 94534758 | 76,013.10 | 100.00% | 3 | 4 | 4 | 0.03% | 5.86%  | ALVLISN<br>VEK                               | 3.22 | 1,085.66 |
| Control | 6011 | acyl-CoA synthetase long-chain family member 5             | gi 115497154,gi 152941112,gi 94534758 | 76,013.10 | 100.00% | 3 | 4 | 4 | 0.03% | 5.86%  | GAMLTH<br>ANIVSN<br>ASGFLK                   | 4.41 | 1,846.95 |
| Control | 6011 | acyl-CoA synthetase long-chain family member 5             | gi 115497154,gi 152941112,gi 94534758 | 76,013.10 | 100.00% | 3 | 4 | 4 | 0.03% | 5.86%  | TLKPTLF<br>PTVPR                             | 3.21 | 1,369.82 |
| Control | 6011 | poly(rC) binding protein 1                                 | gi 59858399,gi 62751650,gi 75040221   | 37,480.20 | 99.80%  | 2 | 3 | 3 | 0.02% | 9.27%  | ESTGAQ<br>VQVAGD<br>MLPNST<br>ER             | 4.65 | 2,105.98 |
| Control | 6011 | poly(rC) binding protein 1                                 | gi 59858399,gi 62751650,gi 75040221   | 37,480.20 | 99.80%  | 2 | 3 | 3 | 0.02% | 9.27%  | IITLTGPT<br>NAIFK                            | 3.58 | 1,388.82 |
| Control | 6011 | PREDICTED: similar to ER lipid raft associated 1 isoform 2 | gi 194678978                          | 39,049.70 | 99.80%  | 2 | 2 | 2 | 0.02% | 15.20% | DLNVMA<br>PGLTIQA<br>VR                      | 3.31 | 1,613.87 |

|         |      |                                                                      |                                                    |           |         |   |   |   |       |        |                                                                         |          |
|---------|------|----------------------------------------------------------------------|----------------------------------------------------|-----------|---------|---|---|---|-------|--------|-------------------------------------------------------------------------|----------|
| Control | 6011 | PREDICTED:<br>similar to<br>ER lipid<br>raft<br>associated isoform 2 | gi 1946789                                         | 39,049.70 | 99.80%  | 2 | 2 | 2 | 0.02% | 15.20% | EALEPSG 3.15<br>ESPIQNK                                                 | 1,498.74 |
| Control | 6011 | PREDICTED:<br>similar to<br>ER lipid<br>raft<br>associated isoform 2 | gi 1946789                                         | 39,049.70 | 99.80%  | 2 | 2 | 2 | 0.02% | 15.20% | ISEIEDA 3.48<br>AFLAR                                                   | 1,334.70 |
| Control | 6011 | PREDICTED:<br>similar to<br>ER lipid<br>raft<br>associated isoform 2 | gi 1946789                                         | 39,049.70 | 99.80%  | 2 | 2 | 2 | 0.02% | 15.20% | SVQTTL 3.97<br>QTDEVK                                                   | 1,348.70 |
| Control | 6011 | transporter 2, ATP-binding cassette, sub-family B                    | gi 1140510-53,gi 19171652,gi 27806345,gi 63169160  | 79,287.60 | 100.00% | 4 | 5 | 5 | 0.04% | 15.00% | LQTVQS 4.68<br>ADQVLVLR                                                 | 1,569.90 |
| Control | 6011 | transporter 2, ATP-binding cassette, sub-family B                    | gi 1140510-53,gi 19171652,gi 27806345,gi 63169160  | 79,287.60 | 100.00% | 4 | 5 | 5 | 0.04% | 15.00% | QVVLVG 4<br>QEPVLFS<br>GSVR                                             | 1,814.02 |
| Control | 6011 | transporter 2, ATP-binding cassette, sub-family B                    | gi 1140510-53,gi 19171652,gi 27806345,gi 63169160  | 79,287.60 | 100.00% | 4 | 5 | 5 | 0.04% | 15.00% | STVAAL 3.31<br>LQNLQY<br>PTEGQV<br>LLDGKP<br>VSEYEH<br>HYLHR            | 4,006.05 |
| Control | 6011 | transporter 2, ATP-binding cassette, sub-family B                    | gi 1140510-53,gi 19171652,gi 27806345,gi 63169160  | 79,287.60 | 100.00% | 4 | 5 | 5 | 0.04% | 15.00% | VNFQNV 3.85<br>SFAYPSR<br>PDQPAL<br>QGLTFT<br>LSPGQM<br>TALVGP<br>NGSGK | 4,408.20 |
| Control | 6011 | Solute carrier family 39 (zinc transporter), member 7                | gi 112362085,gi 115749633,gi 146231764,gi 63169171 | 42,835.10 | 99.80%  | 2 | 2 | 3 | 0.02% | 8.77%  | DGPVVRP 2.61<br>QNAEEE<br>KAGSDL<br>R                                   | 2,068.01 |
| Control | 6011 | Solute carrier family 39 (zinc transporter), member 7                | gi 112362085,gi 115749633,gi 146231764,gi 63169171 | 42,835.10 | 99.80%  | 2 | 2 | 3 | 0.02% | 8.77%  | EKQSSE 2.83<br>EEEKEA<br>GALR                                           | 1,819.87 |

|         |      |                                                                                                    |                                                                                                                          |           |         |   |   |   |       |        |                                        |      |          |
|---------|------|----------------------------------------------------------------------------------------------------|--------------------------------------------------------------------------------------------------------------------------|-----------|---------|---|---|---|-------|--------|----------------------------------------|------|----------|
| Control | 6011 | glutamin<br>yl-<br>peptide<br>cyclotran<br>sferase-<br>like                                        | gi 1103319<br>75,gi 11033<br>1977,gi 112<br>362220,gi 1<br>15495265,g<br>i 12214633<br>5,gi 957685<br>79,gi 95769<br>160 | 41,828.70 | 99.80%  | 2 | 2 | 3 | 0.02% | 9.92%  | GPLIGSL<br>PEAR                        | 2.75 | 1,109.63 |
| Control | 6011 | glutamin<br>yl-<br>peptide<br>cyclotran<br>sferase-<br>like                                        | gi 1103319<br>75,gi 11033<br>1977,gi 112<br>362220,gi 1<br>15495265,g<br>i 12214633<br>5,gi 957685<br>79,gi 95769<br>160 | 41,828.70 | 99.80%  | 2 | 2 | 3 | 0.02% | 9.92%  | IQAIELF<br>MLLDLL<br>GAPNPT<br>FYSHFPR | 3.49 | 3,019.58 |
| Control | 6011 | RecName<br>:<br>Full=Mal<br>ate<br>dehydrog<br>enase,<br>mitochon<br>drial;<br>Flags:<br>Precursor | gi 1185727<br>78,gi 81674<br>781                                                                                         | 35,651.00 | 100.00% | 6 | 7 | 9 | 0.07% | 27.80% | AGAGSA<br>TLSMAY<br>AGAR               | 4.23 | 1,470.70 |
| Control | 6011 | RecName<br>:<br>Full=Mal<br>ate<br>dehydrog<br>enase,<br>mitochon<br>drial;<br>Flags:<br>Precursor | gi 1185727<br>78,gi 81674<br>781                                                                                         | 35,651.00 | 100.00% | 6 | 7 | 9 | 0.07% | 27.80% | ANAFVA<br>ELKDLD<br>PAR                | 3.13 | 1,629.86 |
| Control | 6011 | RecName<br>:<br>Full=Mal<br>ate<br>dehydrog<br>enase,<br>mitochon<br>drial;<br>Flags:<br>Precursor | gi 1185727<br>78,gi 81674<br>781                                                                                         | 35,651.00 | 100.00% | 6 | 7 | 9 | 0.07% | 27.80% | LTLYDIA<br>HTPGVA<br>ADLSHIE<br>TR     | 5.4  | 2,393.25 |
| Control | 6011 | RecName<br>:<br>Full=Mal<br>ate<br>dehydrog<br>enase,<br>mitochon<br>drial;<br>Flags:<br>Precursor | gi 1185727<br>78,gi 81674<br>781                                                                                         | 35,651.00 | 100.00% | 6 | 7 | 9 | 0.07% | 27.80% | MIAEAIP<br>ELK                         | 2.37 | 1,130.61 |

|         |      |                                                                                                    |                                                 |           |         |   |   |    |       |        |                                  |          |
|---------|------|----------------------------------------------------------------------------------------------------|-------------------------------------------------|-----------|---------|---|---|----|-------|--------|----------------------------------|----------|
| Control | 6011 | RecName<br>:<br>Full=Mal<br>ate<br>dehydrog<br>enase,<br>mitochon<br>drial;<br>Flags:<br>Precursor | gi 1185727<br>78,gi 81674<br>781                | 35,651.00 | 100.00% | 6 | 7 | 9  | 0.07% | 27.80% | VAVLGA 4.13<br>SGGIGQP<br>LSLLLK | 1,793.09 |
| Control | 6011 | RecName<br>:<br>Full=Mal<br>ate<br>dehydrog<br>enase,<br>mitochon<br>drial;<br>Flags:<br>Precursor | gi 1185727<br>78,gi 81674<br>781                | 35,651.00 | 100.00% | 6 | 7 | 9  | 0.07% | 27.80% | VNVPVI 3.04<br>GGHAGK            | 1,147.66 |
| Control | 6011 | Chain A,<br>Subcomp<br>lex Of<br>The<br>Stator Of<br>Bovine<br>Mitochon<br>drial Atp<br>Synthase   | gi 1105910<br>26,gi 11059<br>1029,gi 602<br>033 | 24,651.00 | 100.00% | 5 | 7 | 22 | 0.17% | 27.60% | FGLIPEE 3.09<br>FFQFLYP<br>K     | 1,874.97 |
| Control | 6011 | Chain A,<br>Subcomp<br>lex Of<br>The<br>Stator Of<br>Bovine<br>Mitochon<br>drial Atp<br>Synthase   | gi 1105910<br>26,gi 11059<br>1029,gi 602<br>033 | 24,651.00 | 100.00% | 5 | 7 | 22 | 0.17% | 27.60% | HYLFDV 2.77<br>QR                | 1,077.55 |
| Control | 6011 | Chain A,<br>Subcomp<br>lex Of<br>The<br>Stator Of<br>Bovine<br>Mitochon<br>drial Atp<br>Synthase   | gi 1105910<br>26,gi 11059<br>1029,gi 602<br>033 | 24,651.00 | 100.00% | 5 | 7 | 22 | 0.17% | 27.60% | IAQLEEV 4.54<br>KQASIK           | 1,456.84 |
| Control | 6011 | Chain A,<br>Subcomp<br>lex Of<br>The<br>Stator Of<br>Bovine<br>Mitochon<br>drial Atp<br>Synthase   | gi 1105910<br>26,gi 11059<br>1029,gi 602<br>033 | 24,651.00 | 100.00% | 5 | 7 | 22 | 0.17% | 27.60% | NNIAMA 4.28<br>LEVTYR            | 1,410.70 |

|         |      |                                                                           |                                                                          |            |         |   |   |    |       |        |                                                 |          |
|---------|------|---------------------------------------------------------------------------|--------------------------------------------------------------------------|------------|---------|---|---|----|-------|--------|-------------------------------------------------|----------|
| Control | 6011 | Chain A, Subcomp lex Of The Stator Of Bovine Mitochondrial Atp Synthase   | gi 110591026,gi 110591029,gi 602033                                      | 24,651.00  | 100.00% | 5 | 7 | 22 | 0.17% | 27.60% | PVPPPLPE 1.58<br>HGGK                           | 1,127.62 |
| Control | 6011 | Ribosomal protein S8                                                      | gi 119224110,gi 58760384,gi 59858489,gi 70778956,gi 74268417,gi 75070020 | 24,188.40  | 99.80%  | 2 | 3 | 4  | 0.03% | 13.50% | IIDVVVYN 4.95<br>ASNNEL<br>VR                   | 1,718.91 |
| Control | 6011 | Ribosomal protein S8                                                      | gi 119224110,gi 58760384,gi 59858489,gi 70778956,gi 74268417,gi 75070020 | 24,188.40  | 99.80%  | 2 | 3 | 4  | 0.03% | 13.50% | ISSLLEE 4.34<br>QFQQGK                          | 1,506.78 |
| Control | 6011 | PREDICTED: abnormal spindle homolog, microcephaly associated (Drosophila) | gi 119908777,gi 41056704,gi 60391782                                     | 395,853.30 | 99.80%  | 2 | 2 | 2  | 0.02% | 1.10%  | SVPCME 3.19<br>VIRYAM<br>QVLLNV<br>AK           | 2,280.19 |
| Control | 6011 | PREDICTED: abnormal spindle homolog, microcephaly associated (Drosophila) | gi 119908777,gi 41056704,gi 60391782                                     | 395,853.30 | 99.80%  | 2 | 2 | 2  | 0.02% | 1.10%  | VVITYLS 2.92<br>FLCARLL<br>DLR                  | 1,995.15 |
| Control | 6011 | RPS17 protein                                                             | gi 148745739,gi 149642675,gi 151554859,gi 166219437                      | 15,564.50  | 100.00% | 3 | 3 | 3  | 0.02% | 43.70% | IAGYVT 2.88<br>HLMK                             | 1,148.61 |
| Control | 6011 | RPS17 protein                                                             | gi 148745739,gi 149642675,gi 151554859,gi 166219437                      | 15,564.50  | 100.00% | 3 | 3 | 3  | 0.02% | 43.70% | LLDFGSL 3.05<br>SNLQVT<br>QPTVGM<br>NFK         | 2,425.24 |
| Control | 6011 | RPS17 protein                                                             | gi 148745739,gi 149642675,gi 151554859,gi 166219437                      | 15,564.50  | 100.00% | 3 | 3 | 3  | 0.02% | 43.70% | RDNYVP 3.2<br>EVSALD<br>QEIIIVD<br>PDTKEM<br>LK | 3,162.55 |

|         |      |                                                                                                                                                         |            |           |         |   |   |   |       |        |                                      |          |
|---------|------|---------------------------------------------------------------------------------------------------------------------------------------------------------|------------|-----------|---------|---|---|---|-------|--------|--------------------------------------|----------|
| Control | 6011 | PREDIC TED: 64<br>similar to oxysterol 7alpha-hydroxylase                                                                                               | gi 1946727 | 90,479.20 | 100.00% | 5 | 6 | 7 | 0.05% | 9.43%  | AMAVLR 2.89<br>DEIDHLL<br>QSTGQK     | 2,141.10 |
| Control | 6011 | PREDIC TED: 64<br>similar to oxysterol 7alpha-hydroxylase                                                                                               | gi 1946727 | 90,479.20 | 100.00% | 5 | 6 | 7 | 0.05% | 9.43%  | FLFGIPY 3.19<br>PDSVL<br>FR          | 1,785.92 |
| Control | 6011 | PREDIC TED: 64<br>similar to oxysterol 7alpha-hydroxylase                                                                                               | gi 1946727 | 90,479.20 | 100.00% | 5 | 6 | 7 | 0.05% | 9.43%  | LSFQIFT 2.61<br>NK                   | 1,097.60 |
| Control | 6011 | PREDIC TED: 64<br>similar to oxysterol 7alpha-hydroxylase                                                                                               | gi 1946727 | 90,479.20 | 100.00% | 5 | 6 | 7 | 0.05% | 9.43%  | MLTSD 3.6<br>LIDEIHS<br>TYQFLQ<br>GK | 2,470.18 |
| Control | 6011 | PREDIC TED: 64<br>similar to oxysterol 7alpha-hydroxylase                                                                                               | gi 1946727 | 90,479.20 | 100.00% | 5 | 6 | 7 | 0.05% | 9.43%  | YYHLPF 4.67<br>GLGVSK                | 1,380.73 |
| Control | 6011 | RecName: Full=ER lumen protein retaining receptor 2;<br>AltName: Full=KDEL endoplasmic reticulum protein retention receptor 2;<br>Short=KDEL receptor 2 | gi 1162477 | 24,437.80 | 99.80%  | 2 | 2 | 2 | 0.02% | 16.00% | LTGDLS 5.44<br>HLAAIVI<br>LLLK       | 1,790.12 |



|         |      |                                                                                                                                                                                                                   |                                                   |            |         |    |    |    |       |        |                                        |          |
|---------|------|-------------------------------------------------------------------------------------------------------------------------------------------------------------------------------------------------------------------|---------------------------------------------------|------------|---------|----|----|----|-------|--------|----------------------------------------|----------|
| Control | 6011 | RecName<br>: Full=ER<br>lumen<br>protein<br>retaining<br>receptor<br>2;<br>AltName:<br>Full=KD<br>EL<br>endoplas<br>mic<br>reticulum<br>protein<br>retention<br>receptor<br>2;<br>Short=K<br>DEL<br>receptor<br>2 | gi 1162477<br>77.gi 11933<br>1188.gi 868<br>23931 | 24,437.80  | 99.80%  | 2  | 2  | 2  | 0.02% | 16.00% | YLDLFTS 3.63<br>FISLYNT<br>SMK         | 2,059.01 |
| Control | 6011 | TUBA1B<br>protein                                                                                                                                                                                                 | gi 1488780<br>19.gi 16880<br>4008                 | 50,133.70  | 100.00% | 12 | 15 | 24 | 0.19% | 37.70% | AVFVDL 5.22<br>EPTVIDE<br>VR           | 1,701.91 |
| Control | 6011 | TUBA1B<br>protein                                                                                                                                                                                                 | gi 1488780<br>19.gi 16880<br>4008                 | 50,133.70  | 100.00% | 12 | 15 | 24 | 0.19% | 37.70% | DVNAAI 3.03<br>ATIK                    | 1,015.58 |
| Control | 6011 | TUBA1B<br>protein                                                                                                                                                                                                 | gi 1488780<br>19.gi 16880<br>4008                 | 50,133.70  | 100.00% | 12 | 15 | 24 | 0.19% | 37.70% | EIIDLVL 2.4<br>DR                      | 1,085.62 |
| Control | 6011 | TUBA1B<br>protein                                                                                                                                                                                                 | gi 1488780<br>19.gi 16880<br>4008                 | 50,133.70  | 100.00% | 12 | 15 | 24 | 0.19% | 37.70% | FDGALN 3.8<br>VDLTEF<br>QTNLVP<br>YPR  | 2,409.21 |
| Control | 6011 | TUBA1B<br>protein                                                                                                                                                                                                 | gi 1488780<br>19.gi 16880<br>4008                 | 50,133.70  | 100.00% | 12 | 15 | 24 | 0.19% | 37.70% | IHFPLAT 3.5<br>YAPVISA<br>EK           | 1,756.96 |
| Control | 6011 | TUBA1B<br>protein                                                                                                                                                                                                 | gi 1488780<br>19.gi 16880<br>4008                 | 50,133.70  | 100.00% | 12 | 15 | 24 | 0.19% | 37.70% | LDHKFD 2.14<br>LMYAK                   | 1,396.69 |
| Control | 6011 | TUBA1B<br>protein                                                                                                                                                                                                 | gi 1488780<br>19.gi 16880<br>4008                 | 50,133.70  | 100.00% | 12 | 15 | 24 | 0.19% | 37.70% | LISQIVSS 3.78<br>ITASLR                | 1,487.88 |
| Control | 6011 | TUBA1B<br>protein                                                                                                                                                                                                 | gi 1488780<br>19.gi 16880<br>4008                 | 50,133.70  | 100.00% | 12 | 15 | 24 | 0.19% | 37.70% | NLDIERP 3.6<br>TYTNLN<br>R             | 1,718.88 |
| Control | 6011 | TUBA1B<br>protein                                                                                                                                                                                                 | gi 1488780<br>19.gi 16880<br>4008                 | 50,133.70  | 100.00% | 12 | 15 | 24 | 0.19% | 37.70% | QLFHPE 3.82<br>QLITGKE<br>DAANNY<br>AR | 2,415.21 |
| Control | 6011 | TUBA1B<br>protein                                                                                                                                                                                                 | gi 1488780<br>19.gi 16880<br>4008                 | 50,133.70  | 100.00% | 12 | 15 | 24 | 0.19% | 37.70% | RNLDIR 2.33<br>PTYTNL<br>NR            | 1,874.98 |
| Control | 6011 | TUBA1B<br>protein                                                                                                                                                                                                 | gi 1488780<br>19.gi 16880<br>4008                 | 50,133.70  | 100.00% | 12 | 15 | 24 | 0.19% | 37.70% | TIGGGD 3.3<br>DSFNTEF<br>SETGAG<br>K   | 2,007.89 |
| Control | 6011 | TUBA1B<br>protein                                                                                                                                                                                                 | gi 1488780<br>19.gi 16880<br>4008                 | 50,133.70  | 100.00% | 12 | 15 | 24 | 0.19% | 37.70% | VGINYQ 3.9<br>PPTVVP<br>GGDLAK         | 1,824.99 |
| Control | 6011 | KTN1<br>protein                                                                                                                                                                                                   | gi 1544261<br>14.gi 15612<br>1057                 | 150,612.10 | 99.80%  | 2  | 2  | 2  | 0.02% | 2.30%  | AQQLSIT 2.92<br>SQVQEL<br>QNLLK        | 2,041.13 |
| Control | 6011 | KTN1<br>protein                                                                                                                                                                                                   | gi 1544261<br>14.gi 15612<br>1057                 | 150,612.10 | 99.80%  | 2  | 2  | 2  | 0.02% | 2.30%  | SVELLE 3.01<br>AELLK                   | 1,372.76 |

|         |      |                                                                                                                                                                          |                                               |           |        |   |   |   |       |        |                                               |          |
|---------|------|--------------------------------------------------------------------------------------------------------------------------------------------------------------------------|-----------------------------------------------|-----------|--------|---|---|---|-------|--------|-----------------------------------------------|----------|
| Control | 6011 | tricarboxylate carrier protein 1                                                                                                                                         | gi 1765906, gi 2497986, gi 2780719            | 33,859.10 | 99.90% | 2 | 2 | 2 | 0.02% | 7.72%  | GLSSLLY 3.08<br>GSIPK                         | 1,234.70 |
| Control | 6011 | tricarboxylate carrier protein 1                                                                                                                                         | gi 1765906, gi 2497986, gi 2780719            | 33,859.10 | 99.90% | 2 | 2 | 2 | 0.02% | 7.72%  | GTYQGL 2.77<br>TATVLK                         | 1,251.69 |
| Control | 6011 | PREDICTED: similar to transmembrane protein 165                                                                                                                          | gi 7661992                                    | 34,667.10 | 99.80% | 2 | 3 | 4 | 0.03% | 13.30% | MSPDEG 4.11<br>QEELEE<br>VQAELK               | 2,076.93 |
| Control | 6011 | PREDICTED: similar to transmembrane protein 165                                                                                                                          | gi 7661992                                    | 34,667.10 | 99.80% | 2 | 3 | 4 | 0.03% | 13.30% | NKEPPA 5.8<br>PAQQLQ<br>PQPAAV<br>QGPEPA<br>R | 2,619.36 |
| Control | 6011 | RecName: Full=NA DH dehydrogenase [ubiquinone] 1 alpha subcomplex subunit 8; AltName: Full=NA DH-ubiquinone oxidoreductase 19 kDa subunit; AltName: Full=Complex I-19kD; | gi 1171870, gi 2846127, gi 599681, gi 8682766 | 20,073.10 | 99.80% | 2 | 3 | 3 | 0.02% | 17.40% | ARPEPN 5.96<br>PEVEGD<br>LKPAR                | 1,874.97 |

|         |      |                                                                                                                                                                                                                                                                                        |                                                                                |         |    |    |    |       |        |                                                  |          |
|---------|------|----------------------------------------------------------------------------------------------------------------------------------------------------------------------------------------------------------------------------------------------------------------------------------------|--------------------------------------------------------------------------------|---------|----|----|----|-------|--------|--------------------------------------------------|----------|
| Control | 6011 | RecName :<br>Full=NA<br>DH<br>dehydrog<br>enase<br>[ubiquino<br>ne] 1<br>alpha<br>subcompl<br>ex<br>subunit<br>8;<br>AltName:<br>Full=NA<br>DH-<br>ubiquino<br>ne<br>oxidored<br>uctase 19<br>kDa<br>subunit;<br>AltName:<br>Full=Co<br>mplex I-<br>19kD;                              | gi 1171870, 20,073.10<br>gi 2846127<br>5,gi 599681<br>.gi 8682766              | 99.80%  | 2  | 3  | 3  | 0.02% | 17.40% | TDRPLPE 2.21<br>NPYHSR                           | 1,581.78 |
| Control | 6011 | Adaptor-<br>related<br>protein<br>complex<br>2, beta 1<br>subunit                                                                                                                                                                                                                      | gi 1153048 104,551.20<br>48,gi 11549<br>7346,gi 122<br>132354,gi 1<br>24028640 | 99.80%  | 2  | 2  | 2  | 0.02% | 5.12%  | LAPPLVT 4.09<br>LLSGEPE<br>VQYVAL<br>R           | 2,265.29 |
| Control | 6011 | Adaptor-<br>related<br>protein<br>complex<br>2, beta 1<br>subunit                                                                                                                                                                                                                      | gi 1153048 104,551.20<br>48,gi 11549<br>7346,gi 122<br>132354,gi 1<br>24028640 | 99.80%  | 2  | 2  | 2  | 0.02% | 5.12%  | LASQANI 3.37<br>AQVLAE<br>LKEYAT<br>EVDVDF<br>VR | 2,992.56 |
| Control | 6011 | RecName :<br>Full=Nitr<br>ic oxide<br>synthase,<br>endotheli<br>al;<br>AltName:<br>Full=End<br>othelial<br>NOS;<br>Short=eN<br>OS;<br>AltName:<br>Full=EC-<br>NOS;<br>AltName:<br>Full=NO<br>S type III;<br>Short=N<br>OSIII;<br>AltName:<br>Full=Con<br>stitutive<br>NOS;<br>Short=cN | gi 266647 133,270.00                                                           | 100.00% | 12 | 17 | 24 | 0.19% | 12.60% | ATILYAS 3.4<br>ETGR                              | 1,181.62 |













|         |      |                                                                                                                                                                                                                                           |            |         |    |    |    |       |        |                                           |          |
|---------|------|-------------------------------------------------------------------------------------------------------------------------------------------------------------------------------------------------------------------------------------------|------------|---------|----|----|----|-------|--------|-------------------------------------------|----------|
| Control | 6011 | RecName gi 266647<br>:<br>Full=Nitric oxide synthase, endothelial;<br>AltName: Full=Endothelial NOS;<br>Short=eNOS;<br>AltName: Full=EC-NOS;<br>AltName: Full=NO S type III;<br>Short=NO3;<br>AltName: Full=Constitutive NOS;<br>Short=cN | 133,270.00 | 100.00% | 12 | 17 | 24 | 0.19% | 12.60% | YHEDIFG 3.17<br>LTLR                      | 1,363.70 |
| Control | 6011 | PREDIC gi 1199383<br>TED: 28,gi 14874<br>similar to 5492,gi 682<br>eukaryotic 99807,gi 86<br>c 827651<br>translation elongation factor 1 alpha 1 isoform 1                                                                                | 50,141.20  | 100.00% | 4  | 7  | 12 | 0.09% | 11.90% | IGGIGTV 3.15<br>PVGR                      | 1,025.61 |
| Control | 6011 | PREDIC gi 1199383<br>TED: 28,gi 14874<br>similar to 5492,gi 682<br>eukaryotic 99807,gi 86<br>c 827651<br>translation elongation factor 1 alpha 1 isoform 1                                                                                | 50,141.20  | 100.00% | 4  | 7  | 12 | 0.09% | 11.90% | LPLQDV 2.55<br>YK                         | 975.5511 |
| Control | 6011 | PREDIC gi 1199383<br>TED: 28,gi 14874<br>similar to 5492,gi 682<br>eukaryotic 99807,gi 86<br>c 827651<br>translation elongation factor 1 alpha 1 isoform 1                                                                                | 50,141.20  | 100.00% | 4  | 7  | 12 | 0.09% | 11.90% | VETGVL 4.46<br>KPGMVV<br>TFAPVN<br>VTTEVK | 2,531.38 |
| Control | 6011 | PREDIC gi 1199383<br>TED: 28,gi 14874<br>similar to 5492,gi 682<br>eukaryotic 99807,gi 86<br>c 827651<br>translation elongation factor 1 alpha 1 isoform 1                                                                                | 50,141.20  | 100.00% | 4  | 7  | 12 | 0.09% | 11.90% | YYVTHID 3<br>APGHR                        | 1,404.73 |

|         |      |                                                                           |                                                               |           |         |   |   |   |       |        |                                                   |          |
|---------|------|---------------------------------------------------------------------------|---------------------------------------------------------------|-----------|---------|---|---|---|-------|--------|---------------------------------------------------|----------|
| Control | 6011 | cell<br>division<br>cycle 42<br>(GTP<br>binding<br>protein,<br>25kDa)     | gi 1140524<br>86,gi 12206<br>3301,gi 868<br>21687             | 21,240.70 | 99.80%  | 2 | 3 | 8 | 0.06% | 19.90% | NVFDEAI 4.51<br>LAALEPP<br>EPK                    | 1,852.97 |
| Control | 6011 | cell<br>division<br>cycle 42<br>(GTP<br>binding<br>protein,<br>25kDa)     | gi 1140524<br>86,gi 12206<br>3301,gi 868<br>21687             | 21,240.70 | 99.80%  | 2 | 3 | 8 | 0.06% | 19.90% | TPFLLVG 4.97<br>TQIDLRD<br>DPSTIEK                | 2,358.26 |
| Control | 6011 | RecName<br>:<br>Full=Gol<br>gi SNAP<br>receptor<br>complex<br>member<br>1 | gi 1089359<br>98,gi 83638<br>559,gi 8437<br>0083              | 28,524.90 | 99.90%  | 2 | 2 | 2 | 0.02% | 13.60% | MNTLAN 2.85<br>RFP AVN<br>SLIQR                   | 1,961.04 |
| Control | 6011 | RecName<br>:<br>Full=Gol<br>gi SNAP<br>receptor<br>complex<br>member<br>1 | gi 1089359<br>98,gi 83638<br>559,gi 8437<br>0083              | 28,524.90 | 99.90%  | 2 | 2 | 2 | 0.02% | 13.60% | NSDR LIE 2.99<br>ETISIAM<br>ATK                   | 1,907.97 |
| Control | 6011 | LOC535<br>125                                                             | gi 1105589<br>77,gi 11549<br>6698                             | 75,634.70 | 99.80%  | 2 | 2 | 2 | 0.02% | 5.53%  | IAESLGG 3.86<br>SGYSVE<br>R                       | 1,424.70 |
| Control | 6011 | LOC535<br>125                                                             | gi 1105589<br>77,gi 11549<br>6698                             | 75,634.70 | 99.80%  | 2 | 2 | 2 | 0.02% | 5.53%  | VPVFGT 2.56<br>STHTLDI<br>SQLGDL<br>GTRR          | 2,470.31 |
| Control | 6011 | minor<br>histocom<br>patibility<br>antigen<br>13                          | gi 1644486<br>16                                              | 41,537.10 | 100.00% | 3 | 3 | 6 | 0.05% | 15.60% | GEVTEM 3.52<br>FSYEESN<br>PKDPAA<br>VTETR         | 2,703.21 |
| Control | 6011 | minor<br>histocom<br>patibility<br>antigen<br>13                          | gi 1644486<br>16                                              | 41,537.10 | 100.00% | 3 | 3 | 6 | 0.05% | 15.60% | LVFPQD 2.62<br>LLEK                               | 1,201.68 |
| Control | 6011 | minor<br>histocom<br>patibility<br>antigen<br>13                          | gi 1644486<br>16                                              | 41,537.10 | 100.00% | 3 | 3 | 6 | 0.05% | 15.60% | QYQLLF 4.93<br>TQGSGE<br>NKEE IIN<br>YEFDTK       | 2,994.44 |
| Control | 6011 | transcript<br>ion factor<br>EF1(A)                                        | gi 162983,g<br>i 27807361,<br>gi 5404003<br>0,gi 868212<br>83 | 35,905.70 | 100.00% | 4 | 5 | 8 | 0.06% | 31.20% | EDGNEE 3.23<br>DKENQG<br>DETQGG<br>QPPQR          | 2,628.10 |
| Control | 6011 | transcript<br>ion factor<br>EF1(A)                                        | gi 162983,g<br>i 27807361,<br>gi 5404003<br>0,gi 868212<br>83 | 35,905.70 | 100.00% | 4 | 5 | 8 | 0.06% | 31.20% | GAE AAN 4.31<br>VTGPGG<br>VPVQGS<br>K             | 1,695.87 |
| Control | 6011 | transcript<br>ion factor<br>EF1(A)                                        | gi 162983,g<br>i 27807361,<br>gi 5404003<br>0,gi 868212<br>83 | 35,905.70 | 100.00% | 4 | 5 | 8 | 0.06% | 31.20% | NYQQNY 5.62<br>QNSEG<br>EKNEGS<br>ESAPEG<br>QAQQR | 3,257.40 |

|         |      |                                                                                                                                                             |                                                                   |           |         |   |   |   |       |        |                                                |      |          |
|---------|------|-------------------------------------------------------------------------------------------------------------------------------------------------------------|-------------------------------------------------------------------|-----------|---------|---|---|---|-------|--------|------------------------------------------------|------|----------|
| Control | 6011 | transcript<br>ion factor<br>EF1(A)                                                                                                                          | gi 162983.g<br>i 27807361,<br>gi 5404003<br>0,gi 868212<br>83     | 35,905.70 | 100.00% | 4 | 5 | 8 | 0.06% | 31.20% | RPQYSN<br>PPVQGE<br>VMEGAD<br>NQGAGE<br>QGRPVR | 4.81 | 3,239.53 |
| Control | 6011 | PREDIC<br>TED:<br>similar to<br>vesicle<br>amine<br>transport<br>protein 1<br>isoform 1                                                                     | gi 7667127<br>8                                                   | 42,822.00 | 100.00% | 3 | 3 | 3 | 0.02% | 10.20% | GVDIVM<br>DPLGGS<br>DTAK                       | 3.8  | 1,590.77 |
| Control | 6011 | PREDIC<br>TED:<br>similar to<br>vesicle<br>amine<br>transport<br>protein 1<br>isoform 1                                                                     | gi 7667127<br>8                                                   | 42,822.00 | 100.00% | 3 | 3 | 3 | 0.02% | 10.20% | VLLVPG<br>PEKEN                                | 2.67 | 1,194.67 |
| Control | 6011 | PREDIC<br>TED:<br>similar to<br>vesicle<br>amine<br>transport<br>protein 1<br>isoform 1                                                                     | gi 7667127<br>8                                                   | 42,822.00 | 100.00% | 3 | 3 | 3 | 0.02% | 10.20% | VVTYG<br>MANLLT<br>GPK                         | 3.28 | 1,479.79 |
| Control | 6011 | RecName<br>:<br>Full=Ade<br>nosylhom<br>ocysteina<br>se;<br>Short=Ad<br>oHcyase;<br>AltName:<br>Full=S-<br>adenosyl-<br>L-<br>homocyst<br>eine<br>hydrolase | gi 1185738<br>56,gi 14623<br>1804,gi 757<br>73598,gi 77<br>735583 | 47,620.90 | 100.00% | 4 | 4 | 5 | 0.04% | 12.50% | DGPLNM<br>ILDDGG<br>DLTNLIH<br>TK              | 3.74 | 2,268.12 |
| Control | 6011 | RecName<br>:<br>Full=Ade<br>nosylhom<br>ocysteina<br>se;<br>Short=Ad<br>oHcyase;<br>AltName:<br>Full=S-<br>adenosyl-<br>L-<br>homocyst<br>eine<br>hydrolase | gi 1185738<br>56,gi 14623<br>1804,gi 757<br>73598,gi 77<br>735583 | 47,620.90 | 100.00% | 4 | 4 | 5 | 0.04% | 12.50% | VAVVAG<br>YGDVVK                               | 3.29 | 1,134.62 |

|         |      |                                                                                                                                                             |                                                                   |           |         |   |   |   |       |        |                                                       |      |          |
|---------|------|-------------------------------------------------------------------------------------------------------------------------------------------------------------|-------------------------------------------------------------------|-----------|---------|---|---|---|-------|--------|-------------------------------------------------------|------|----------|
| Control | 6011 | RecName<br>:<br>Full=Ade<br>nosylhom<br>ocysteina<br>se;<br>Short=Ad<br>oHcyase;<br>AltName:<br>Full=S-<br>adenosyl-<br>L-<br>homocyst<br>eine<br>hydrolase | gi 1185738<br>56,gi 14623<br>1804,gi 757<br>73598,gi 77<br>735583 | 47,620.90 | 100.00% | 4 | 4 | 5 | 0.04% | 12.50% | VPAINV<br>NDSVTK                                      | 4.01 | 1,256.68 |
| Control | 6011 | RecName<br>:<br>Full=Ade<br>nosylhom<br>ocysteina<br>se;<br>Short=Ad<br>oHcyase;<br>AltName:<br>Full=S-<br>adenosyl-<br>L-<br>homocyst<br>eine<br>hydrolase | gi 1185738<br>56,gi 14623<br>1804,gi 757<br>73598,gi 77<br>735583 | 47,620.90 | 100.00% | 4 | 4 | 5 | 0.04% | 12.50% | YPQLLS<br>GIR                                         | 3.15 | 1,046.60 |
| Control | 6011 | glycosyltr<br>ansferase<br>8 domain<br>containin<br>g 1                                                                                                     | gi 5985831<br>1,gi 627519<br>68,gi 75040<br>232,gi 8875<br>8687   | 41,941.60 | 100.00% | 2 | 2 | 2 | 0.02% | 7.28%  | FYLPILV<br>PR                                         | 3.04 | 1,117.68 |
| Control | 6011 | glycosyltr<br>ansferase<br>8 domain<br>containin<br>g 1                                                                                                     | gi 5985831<br>1,gi 627519<br>68,gi 75040<br>232,gi 8875<br>8687   | 41,941.60 | 100.00% | 2 | 2 | 2 | 0.02% | 7.28%  | VKEDPD<br>QGSIKP<br>LTFAR                             | 2.72 | 2,030.06 |
| Control | 6011 | H3<br>histone,<br>family<br>3A                                                                                                                              | gi 5985828<br>9,gi 621771<br>68,gi 95769<br>331                   | 15,310.70 | 100.00% | 3 | 4 | 8 | 0.06% | 38.20% | EIAQDFK<br>TDLR                                       | 3.26 | 1,335.69 |
| Control | 6011 | H3<br>histone,<br>family<br>3A                                                                                                                              | gi 5985828<br>9,gi 621771<br>68,gi 95769<br>331                   | 15,310.70 | 100.00% | 3 | 4 | 8 | 0.06% | 38.20% | FQSA AIG<br>ALQEAS<br>EAYLVG<br>LFEDTN<br>LCAIHA<br>K | 4.62 | 3,380.68 |
| Control | 6011 | H3<br>histone,<br>family<br>3A                                                                                                                              | gi 5985828<br>9,gi 621771<br>68,gi 95769<br>331                   | 15,310.70 | 100.00% | 3 | 4 | 8 | 0.06% | 38.20% | YRPGTV<br>ALR                                         | 2.65 | 1,032.59 |
| Control | 6011 | PREDIC<br>TED:<br>similar to<br>heterogen<br>eous<br>nuclear<br>ribonucle<br>oprotein<br>A3                                                                 | gi 1946645<br>64                                                  | 39,691.20 | 99.80%  | 2 | 2 | 2 | 0.02% | 11.30% | IFVGGIK<br>EDTEEY<br>NLRDYF<br>EK                     | 2.36 | 2,565.25 |

|         |      |                                                                 |                                                               |           |         |   |   |   |       |        |                                      |      |          |
|---------|------|-----------------------------------------------------------------|---------------------------------------------------------------|-----------|---------|---|---|---|-------|--------|--------------------------------------|------|----------|
| Control | 6011 | PREDICTED: similar to heterogenous nuclear ribonucleoprotein A3 | gi 194664564                                                  | 39,691.20 | 99.80%  | 2 | 2 | 2 | 0.02% | 11.30% | SSGSPY<br>GGGYGS<br>GGGSGG<br>YGSR   | 4.69 | 1,910.79 |
| Control | 6011 | dihydroxototate dehydrogenase precursor                         | gi 110665638,gi 112362407,gi 59857979,gi 62751827,gi 75057853 | 42,758.80 | 100.00% | 4 | 4 | 4 | 0.03% | 13.70% | FTSLGLL<br>PR                        | 2.79 | 1,003.59 |
| Control | 6011 | dihydroxototate dehydrogenase precursor                         | gi 110665638,gi 112362407,gi 59857979,gi 62751827,gi 75057853 | 42,758.80 | 100.00% | 4 | 4 | 4 | 0.03% | 13.70% | LTEDGL<br>PLGINLG<br>K               | 4.37 | 1,439.81 |
| Control | 6011 | dihydroxototate dehydrogenase precursor                         | gi 110665638,gi 112362407,gi 59857979,gi 62751827,gi 75057853 | 42,758.80 | 100.00% | 4 | 4 | 4 | 0.03% | 13.70% | VFRLPE<br>DQAIINR                    | 3.8  | 1,570.87 |
| Control | 6011 | dihydroxototate dehydrogenase precursor                         | gi 110665638,gi 112362407,gi 59857979,gi 62751827,gi 75057853 | 42,758.80 | 100.00% | 4 | 4 | 4 | 0.03% | 13.70% | VPIVGV<br>GGVSSG<br>QDALEK           | 5.24 | 1,711.92 |
| Control | 6011 | inositol monophosphatase domain containin g 1                   | gi 114052460,gi 122136157,gi 86827736                         | 38,905.90 | 99.80%  | 2 | 2 | 3 | 0.02% | 8.84%  | TREGAD<br>DKMTSG<br>DVLSNR           | 3.19 | 1,967.91 |
| Control | 6011 | inositol monophosphatase domain containin g 1                   | gi 114052460,gi 122136157,gi 86827736                         | 38,905.90 | 99.80%  | 2 | 2 | 3 | 0.02% | 8.84%  | VLALLD<br>VPDKSQ<br>EK               | 2.01 | 1,554.87 |
| Control | 6011 | MHC class I antigen                                             | gi 72536869                                                   | 40,311.10 | 99.80%  | 2 | 3 | 9 | 0.07% | 18.20% | EGEDQT<br>QDMELV<br>ETRPSG<br>DGTFAQ | 2.99 | 2,713.19 |
| Control | 6011 | MHC class I antigen                                             | gi 72536869                                                   | 40,311.10 | 99.80%  | 2 | 3 | 9 | 0.07% | 18.20% | GYSQDA<br>YDGRDY<br>IALNEDL<br>R     | 4.98 | 2,334.06 |
| Control | 6011 | MHC class I antigen                                             | gi 72536869                                                   | 40,311.10 | 99.80%  | 2 | 3 | 9 | 0.07% | 18.20% | PGLEEPR<br>FIIVGYV<br>DDTQFV<br>R    | 3.05 | 2,450.27 |
| Control | 6011 | TM9SF4 protein                                                  | gi 146186797,gi 166063945,gi 172047290                        | 74,351.10 | 100.00% | 4 | 6 | 9 | 0.07% | 7.01%  | AENLGE<br>VLR                        | 2.84 | 1,000.54 |
| Control | 6011 | TM9SF4 protein                                                  | gi 146186797,gi 166063945,gi 172047290                        | 74,351.10 | 100.00% | 4 | 6 | 9 | 0.07% | 7.01%  | AENLGE<br>VLRGDR                     | 2.6  | 1,328.69 |

|         |      |                                                                              |                                                                                                |            |         |   |   |   |       |        |                                  |          |
|---------|------|------------------------------------------------------------------------------|------------------------------------------------------------------------------------------------|------------|---------|---|---|---|-------|--------|----------------------------------|----------|
| Control | 6011 | TM9SF4 protein                                                               | gi 1461867<br>97,gi 16606<br>3945,gi 172<br>047290                                             | 74,351.10  | 100.00% | 4 | 6 | 9 | 0.07% | 7.01%  | ISEDYYV 5.38<br>HLIADNL<br>PVATR | 2,189.12 |
| Control | 6011 | TM9SF4 protein                                                               | gi 1461867<br>97,gi 16606<br>3945,gi 172<br>047290                                             | 74,351.10  | 100.00% | 4 | 6 | 9 | 0.07% | 7.01%  | IVNTPFQ 3.75<br>VLMNSE<br>K      | 1,635.84 |
| Control | 6011 | PREDIC TED: plexin A2                                                        | gi 1946742<br>54                                                                               | 210,938.30 | 99.90%  | 2 | 2 | 2 | 0.02% | 1.80%  | EAFael 2.95<br>QTDINEL<br>TSDLDR | 2,180.04 |
| Control | 6011 | PREDIC TED: plexin A2                                                        | gi 1946742<br>54                                                                               | 210,938.30 | 99.90%  | 2 | 2 | 2 | 0.02% | 1.80%  | FVDDLf 2.98<br>ETLFSTV<br>HR     | 1,825.91 |
| Control | 6011 | STX12 protein                                                                | gi 1544255<br>59,gi 15442<br>5988,gi 155<br>371837                                             | 31,338.20  | 99.80%  | 2 | 2 | 2 | 0.02% | 10.60% | ELGSLPL 3.54<br>PLSTSEQ<br>R     | 1,626.87 |
| Control | 6011 | STX12 protein                                                                | gi 1544255<br>59,gi 15442<br>5988,gi 155<br>371837                                             | 31,338.20  | 99.80%  | 2 | 2 | 2 | 0.02% | 10.60% | QLEADIL 3.72<br>DVNQIF<br>K      | 1,645.88 |
| Control | 6011 | PREDIC TED: similar to plexin B2 isoform 1                                   | gi 1946812<br>62                                                                               | 204,931.90 | 100.00% | 2 | 2 | 2 | 0.02% | 1.68%  | EAFEAY 2.93<br>TDHATY<br>K       | 1,545.69 |
| Control | 6011 | PREDIC TED: similar to plexin B2 isoform 1                                   | gi 1946812<br>62                                                                               | 204,931.90 | 100.00% | 2 | 2 | 2 | 0.02% | 1.68%  | NLDTVQ 3.64<br>GSPLLV<br>GSDLLK  | 1,869.03 |
| Control | 6011 | PREDIC TED: similar to Glycerald ehyde-3-phosphat e dehydrog enase isoform 2 | gi 1198930<br>91,gi 18417<br>58,gi 22859<br>03,gi 73587<br>299,gi 7740<br>4273,gi 895<br>73947 | 35,850.00  | 100.00% | 4 | 5 | 7 | 0.05% | 21.00% | AITIFQE 2.06<br>RDPANI<br>K      | 1,615.88 |
| Control | 6011 | PREDIC TED: similar to Glycerald ehyde-3-phosphat e dehydrog enase isoform 2 | gi 1198930<br>91,gi 18417<br>58,gi 22859<br>03,gi 73587<br>299,gi 7740<br>4273,gi 895<br>73947 | 35,850.00  | 100.00% | 4 | 5 | 7 | 0.05% | 21.00% | GAAQNII 3.96<br>PASTGA<br>AK     | 1,369.74 |
| Control | 6011 | PREDIC TED: similar to Glycerald ehyde-3-phosphat e dehydrog enase isoform 2 | gi 1198930<br>91,gi 18417<br>58,gi 22859<br>03,gi 73587<br>299,gi 7740<br>4273,gi 895<br>73947 | 35,850.00  | 100.00% | 4 | 5 | 7 | 0.05% | 21.00% | IVSNASC 2.29<br>TTNCLA<br>PLAK   | 1,705.86 |

|         |      |                                                                              |                                                                        |           |         |   |   |   |       |        |                                            |      |          |
|---------|------|------------------------------------------------------------------------------|------------------------------------------------------------------------|-----------|---------|---|---|---|-------|--------|--------------------------------------------|------|----------|
| Control | 6011 | PREDIC TED: similar to Glyceraldehyde-3-phosphate dehydrogenase isoform 2    | gi 119893091,gi 1841758,gi 2285903,gi 73587299,gi 77404273,gi 89573947 | 35,850.00 | 100.00% | 4 | 5 | 7 | 0.05% | 21.00% | VIHDHF<br>GIVEGL<br>MTTVHA<br>ITATQK       | 4    | 2,634.37 |
| Control | 6011 | v-yes-1 Yamaguchi sarcoma viral oncogene homolog 1                           | gi 155371851                                                           | 60,580.30 | 99.80%  | 2 | 2 | 2 | 0.02% | 6.10%  | GRVPYP<br>GMVNR                            | 3.13 | 1,261.65 |
| Control | 6011 | v-yes-1 Yamaguchi sarcoma viral oncogene homolog 1                           | gi 155371851                                                           | 60,580.30 | 99.80%  | 2 | 2 | 2 | 0.02% | 6.10%  | LVPLYA<br>VVSEEPI<br>YIVTEF<br>MSK         | 2.89 | 2,543.34 |
| Control | 6011 | PREDIC TED: similar to Dehydrogenase/reductase SDR family member 7B, partial | gi 119935978                                                           | 29,227.90 | 99.80%  | 2 | 2 | 2 | 0.02% | 10.70% | SPVQVA<br>QDILAAL<br>GK                    | 4.68 | 1,509.86 |
| Control | 6011 | PREDIC TED: similar to Dehydrogenase/reductase SDR family member 7B, partial | gi 119935978                                                           | 29,227.90 | 99.80%  | 2 | 2 | 2 | 0.02% | 10.70% | VMETNY<br>FGPVAL<br>TK                     | 4.04 | 1,585.79 |
| Control | 6011 | TMEM43 protein                                                               | gi 151556045,gi 156523072                                              | 44,774.20 | 100.00% | 3 | 5 | 6 | 0.05% | 12.70% | FFLSAGL<br>IDKVDN<br>FK                    | 1.85 | 1,713.92 |
| Control | 6011 | TMEM43 protein                                                               | gi 151556045,gi 156523072                                              | 44,774.20 | 100.00% | 3 | 5 | 6 | 0.05% | 12.70% | LEDPHV<br>DIIR                             | 2.34 | 1,206.65 |
| Control | 6011 | TMEM43 protein                                                               | gi 151556045,gi 156523072                                              | 44,774.20 | 100.00% | 3 | 5 | 6 | 0.05% | 12.70% | VSFSYA<br>GLSSDD<br>PDLGPA<br>HVVTVI<br>AR | 4.55 | 2,673.35 |
| Control | 6011 | integral membrane protein 1                                                  | gi 114051696,gi 122136222,gi 152941168,gi 86823970                     | 80,641.10 | 99.90%  | 2 | 2 | 4 | 0.03% | 2.55%  | FYSLLDP<br>SYAK                            | 2.53 | 1,303.66 |

|         |      |                                                                                                                                                                       |                                                                                                |            |         |   |   |   |       |        |                                     |      |          |
|---------|------|-----------------------------------------------------------------------------------------------------------------------------------------------------------------------|------------------------------------------------------------------------------------------------|------------|---------|---|---|---|-------|--------|-------------------------------------|------|----------|
| Control | 6011 | intergral membrane protein 1                                                                                                                                          | gi 114051696,gi 122136222,gi 152941168,gi 86823970                                             | 80,641.10  | 99.90%  | 2 | 2 | 4 | 0.03% | 2.55%  | IIFDDFR                             | 2.24 | 925.4779 |
| Control | 6011 | Myeloid-associated differentiation marker                                                                                                                             | gi 111308557,gi 115497460                                                                      | 35,291.10  | 99.80%  | 2 | 3 | 7 | 0.05% | 9.01%  | LVFVRV                              | 1.99 | 732.4766 |
| Control | 6011 | Myeloid-associated differentiation marker                                                                                                                             | gi 111308557,gi 115497460                                                                      | 35,291.10  | 99.80%  | 2 | 3 | 7 | 0.05% | 9.01%  | TTVTTT<br>MSSSSG<br>LGSPDIV<br>GSPR | 4.17 | 2,240.11 |
| Control | 6011 | ribosomal protein L24                                                                                                                                                 | gi 27806129,gi 28189314,gi 28189753,gi 28189757,gi 28189765,gi 3132823,gi 41019240,gi 74267598 | 17,630.30  | 99.80%  | 2 | 2 | 2 | 0.02% | 13.50% | AITGASL<br>ADIMAK                   | 4.41 | 1,277.68 |
| Control | 6011 | ribosomal protein L24                                                                                                                                                 | gi 27806129,gi 28189314,gi 28189753,gi 28189757,gi 28189765,gi 3132823,gi 41019240,gi 74267598 | 17,630.30  | 99.80%  | 2 | 2 | 2 | 0.02% | 13.50% | VFQFLN<br>AK                        | 2.14 | 966.5407 |
| Control | 6011 | PREDICTED: similar to Atrial natriuretic peptide receptor A precursor (ANP-A) (ANPRA) (GC-A) (Guanylate cyclase) (NPR-A) (Atrial natriuretic peptide A-type receptor) | gi 194665089                                                                                   | 119,021.60 | 100.00% | 3 | 3 | 3 | 0.02% | 4.04%  | IITYKEP<br>DNPEYL<br>EFLQK          | 3.19 | 2,240.15 |



|         |      |                                                                                                                                                                              |            |            |         |   |   |   |       |        |                              |          |
|---------|------|------------------------------------------------------------------------------------------------------------------------------------------------------------------------------|------------|------------|---------|---|---|---|-------|--------|------------------------------|----------|
| Control | 6011 | PREDIC TED: 89<br>similar to Atrial natriuretic peptide receptor A precursor (ANP-A) (ANPRA) (GC-A) (Guanylate cyclase) (NPR-A) (Atrial natriuretic peptide A-type receptor) | gi 1946650 | 119,021.60 | 100.00% | 3 | 3 | 3 | 0.02% | 4.04%  | MALALL 3.37<br>DAVR          | 1,088.61 |
| Control | 6011 | PREDIC TED: 89<br>similar to Atrial natriuretic peptide receptor A precursor (ANP-A) (ANPRA) (GC-A) (Guanylate cyclase) (NPR-A) (Atrial natriuretic peptide A-type receptor) | gi 1946650 | 119,021.60 | 100.00% | 3 | 3 | 3 | 0.02% | 4.04%  | MEQYAN 3.71<br>NLEELV<br>EER | 1,882.85 |
| Control | 6011 | PREDIC TED: 81.gi 19468<br>similar to 5483 Keratin 10 (epidermolytic hyperkeratosis; keratosis palmaris et plantaris) isoform 2                                              | gi 1946854 | 54,832.90  | 100.00% | 6 | 7 | 8 | 0.06% | 10.10% | DAEAWF 2.6<br>NEK            | 1,109.49 |

|         |      |                                                                                                                                              |           |         |   |   |   |       |        |                |      |          |
|---------|------|----------------------------------------------------------------------------------------------------------------------------------------------|-----------|---------|---|---|---|-------|--------|----------------|------|----------|
| Control | 6011 | PREDIC TED: gi 1946854 81.gi 19468 similar to 5483<br>Keratin 10 (epiderm olytic hyperkera tosis; keratosis palmaris et plantaris) isoform 2 | 54,832.90 | 100.00% | 6 | 7 | 8 | 0.06% | 10.10% | IRLENEI QTYR   | 4.13 | 1,434.77 |
| Control | 6011 | PREDIC TED: gi 1946854 81.gi 19468 similar to 5483<br>Keratin 10 (epiderm olytic hyperkera tosis; keratosis palmaris et plantaris) isoform 2 | 54,832.90 | 100.00% | 6 | 7 | 8 | 0.06% | 10.10% | LENEIQT YR     | 3.44 | 1,165.58 |
| Control | 6011 | PREDIC TED: gi 1946854 81.gi 19468 similar to 5483<br>Keratin 10 (epiderm olytic hyperkera tosis; keratosis palmaris et plantaris) isoform 2 | 54,832.90 | 100.00% | 6 | 7 | 8 | 0.06% | 10.10% | QSLEASL AETEGR | 4.14 | 1,390.68 |
| Control | 6011 | PREDIC TED: gi 1946854 81.gi 19468 similar to 5483<br>Keratin 10 (epiderm olytic hyperkera tosis; keratosis palmaris et plantaris) isoform 2 | 54,832.90 | 100.00% | 6 | 7 | 8 | 0.06% | 10.10% | SQYEQL AEKNR   | 3.05 | 1,365.68 |
| Control | 6011 | PREDIC TED: gi 1946854 81.gi 19468 similar to 5483<br>Keratin 10 (epiderm olytic hyperkera tosis; keratosis palmaris et plantaris) isoform 2 | 54,832.90 | 100.00% | 6 | 7 | 8 | 0.06% | 10.10% | VLDELT LTK     | 2.44 | 1,031.60 |

|         |      |                                                                          |                           |            |         |   |   |   |       |        |                                        |      |          |
|---------|------|--------------------------------------------------------------------------|---------------------------|------------|---------|---|---|---|-------|--------|----------------------------------------|------|----------|
| Control | 6011 | MATR3 protein                                                            | gi 134024643,gi 156523084 | 93,810.30  | 100.00% | 7 | 8 | 8 | 0.06% | 16.50% | DLDELS<br>RYPEDKI<br>TPENLP<br>QILLQLK | 4.88 | 3,080.65 |
| Control | 6011 | MATR3 protein                                                            | gi 134024643,gi 156523084 | 93,810.30  | 100.00% | 7 | 8 | 8 | 0.06% | 16.50% | DLSAAGI<br>GLLAAA<br>TQSLSM<br>PASLGR  | 2.26 | 2,387.26 |
| Control | 6011 | MATR3 protein                                                            | gi 134024643,gi 156523084 | 93,810.30  | 100.00% | 7 | 8 | 8 | 0.06% | 16.50% | DSFDDR<br>GPSLNP<br>VLDYDH<br>GSR      | 4.95 | 2,362.07 |
| Control | 6011 | MATR3 protein                                                            | gi 134024643,gi 156523084 | 93,810.30  | 100.00% | 7 | 8 | 8 | 0.06% | 16.50% | SQESGY<br>YDRMD<br>YEDDRL<br>R         | 2.39 | 2,313.97 |
| Control | 6011 | MATR3 protein                                                            | gi 134024643,gi 156523084 | 93,810.30  | 100.00% | 7 | 8 | 8 | 0.06% | 16.50% | VIHLSNL<br>PHSGYS<br>DSAVLK            | 3.51 | 2,037.08 |
| Control | 6011 | MATR3 protein                                                            | gi 134024643,gi 156523084 | 93,810.30  | 100.00% | 7 | 8 | 8 | 0.06% | 16.50% | VVHIMD<br>FQR                          | 3.07 | 1,160.59 |
| Control | 6011 | MATR3 protein                                                            | gi 134024643,gi 156523084 | 93,810.30  | 100.00% | 7 | 8 | 8 | 0.06% | 16.50% | YQLLQL<br>VEPFGVI<br>SNHLILN<br>K      | 3.46 | 2,438.38 |
| Control | 6011 | PREDICTED: similar to dynein, cytoplasmic, heavy polypeptide 1 isoform 3 | gi 194677009              | 531,935.00 | 100.00% | 5 | 5 | 5 | 0.04% | 2.35%  | AHQANQ<br>LYPFAIS<br>LIESVR            | 3.82 | 2,157.15 |
| Control | 6011 | PREDICTED: similar to dynein, cytoplasmic, heavy polypeptide 1 isoform 3 | gi 194677009              | 531,935.00 | 100.00% | 5 | 5 | 5 | 0.04% | 2.35%  | GIFEALR<br>PLETLPV<br>EGLIR            | 2.85 | 2,123.22 |
| Control | 6011 | PREDICTED: similar to dynein, cytoplasmic, heavy polypeptide 1 isoform 3 | gi 194677009              | 531,935.00 | 100.00% | 5 | 5 | 5 | 0.04% | 2.35%  | KLVPLLL<br>EDGGEA<br>PAALEA<br>ALEEK   | 3.12 | 2,476.35 |
| Control | 6011 | PREDICTED: similar to dynein, cytoplasmic, heavy polypeptide 1 isoform 3 | gi 194677009              | 531,935.00 | 100.00% | 5 | 5 | 5 | 0.04% | 2.35%  | LVAEDIP<br>LLFSLLS<br>DVFPGV<br>QYHR   | 4.46 | 2,728.47 |

|         |      |                                                                          |            |            |         |   |   |    |       |        |                            |      |          |
|---------|------|--------------------------------------------------------------------------|------------|------------|---------|---|---|----|-------|--------|----------------------------|------|----------|
| Control | 6011 | PREDICTED: similar to dynein, cytoplasmic, heavy polypeptide 1 isoform 3 | gi 1946770 | 531,935.00 | 100.00% | 5 | 5 | 5  | 0.04% | 2.35%  | VFYEED LDVPLV LFNEVL DHVLR | 4.57 | 2,787.46 |
| Control | 6011 | Mannose-6-phosphate receptor (cation dependent)                          | gi 1113085 | 31,183.50  | 100.00% | 4 | 6 | 13 | 0.10% | 23.30% | GKESK ELALK                | 3.61 | 1,344.77 |
| Control | 6011 | Mannose-6-phosphate receptor (cation dependent)                          | gi 1113085 | 31,183.50  | 100.00% | 4 | 6 | 13 | 0.10% | 23.30% | GVGDDQ LGEESEE RDDHLL PM   | 2.4  | 2,357.02 |
| Control | 6011 | Mannose-6-phosphate receptor (cation dependent)                          | gi 1113085 | 31,183.50  | 100.00% | 4 | 6 | 13 | 0.10% | 23.30% | HTLADN FNPVSEER            | 4.86 | 1,628.77 |
| Control | 6011 | Mannose-6-phosphate receptor (cation dependent)                          | gi 1113085 | 31,183.50  | 100.00% | 4 | 6 | 13 | 0.10% | 23.30% | SFESTVG QSPDMY SYVFR       | 3.9  | 2,115.93 |
| Control | 6011 | ADP-ribosylation-like factor 6 interacting protein 5                     | gi 5985816 | 21,648.60  | 99.80%  | 2 | 3 | 7  | 0.05% | 13.80% | FARPDFR                    | 1.77 | 908.4737 |
| Control | 6011 | ADP-ribosylation-like factor 6 interacting protein 5                     | gi 5985816 | 21,648.60  | 99.80%  | 2 | 3 | 7  | 0.05% | 13.80% | TPMGIV LDALEQ QEETITK      | 4.45 | 2,132.08 |
| Control | 6011 | Heterogeneous nuclear ribonucleoprotein U (scaffold attachment factor A) | gi 1248289 | 90,435.30  | 100.00% | 4 | 4 | 6  | 0.05% | 10.50% | EKPYFPI PEDYTFI QNVPLE DR  | 4.18 | 2,710.34 |

|         |      |                                                                          |                                        |           |         |   |   |   |       |        |                                                           |          |
|---------|------|--------------------------------------------------------------------------|----------------------------------------|-----------|---------|---|---|---|-------|--------|-----------------------------------------------------------|----------|
| Control | 6011 | Heterogeneous nuclear ribonucleoprotein U (scaffold attachment factor A) | gi 124828988,gi 125991756              | 90,435.30 | 100.00% | 4 | 4 | 6 | 0.05% | 10.50% | LQAALD 4.99<br>DEEAGG<br>RPAMEP<br>GNGSLD<br>LGGDSA<br>GR | 3,142.43 |
| Control | 6011 | Heterogeneous nuclear ribonucleoprotein U (scaffold attachment factor A) | gi 124828988,gi 125991756              | 90,435.30 | 100.00% | 4 | 4 | 6 | 0.05% | 10.50% | NFILDQT 3.91<br>NVSAAA<br>QR                              | 1,647.84 |
| Control | 6011 | Heterogeneous nuclear ribonucleoprotein U (scaffold attachment factor A) | gi 124828988,gi 125991756              | 90,435.30 | 100.00% | 4 | 4 | 6 | 0.05% | 10.50% | SSGPTSL 2.25<br>FAVTVA<br>PPGAR                           | 1,714.91 |
| Control | 6011 | Ectonucleotide pyrophosphatase/hosphodiesterase 4 (putative function)    | gi 124829038,gi 125630707,gi 171769867 | 51,147.90 | 100.00% | 3 | 4 | 5 | 0.04% | 9.27%  | ADYLQN 4.7<br>YEFPHL<br>QNFIK                             | 2,140.05 |
| Control | 6011 | Ectonucleotide pyrophosphatase/hosphodiesterase 4 (putative function)    | gi 124829038,gi 125630707,gi 171769867 | 51,147.90 | 100.00% | 3 | 4 | 5 | 0.04% | 9.27%  | LLVVSFD 3.23<br>GFR                                       | 1,166.66 |
| Control | 6011 | Ectonucleotide pyrophosphatase/hosphodiesterase 4 (putative function)    | gi 124829038,gi 125630707,gi 171769867 | 51,147.90 | 100.00% | 3 | 4 | 5 | 0.04% | 9.27%  | VLEEIDE 3.05<br>HIGELV<br>HR                              | 1,787.93 |
| Control | 6011 | DPYSL3 protein                                                           | gi 154426078,gi 155371867              | 73,970.90 | 100.00% | 6 | 6 | 6 | 0.05% | 12.60% | DNFTAIP 2.26<br>EGTNGV<br>EER                             | 1,748.81 |
| Control | 6011 | DPYSL3 protein                                                           | gi 154426078,gi 155371867              | 73,970.90 | 100.00% | 6 | 6 | 6 | 0.05% | 12.60% | EESREPA 3.9<br>PASPAPA<br>GVEIR                           | 1,962.99 |
| Control | 6011 | DPYSL3 protein                                                           | gi 154426078,gi 155371867              | 73,970.90 | 100.00% | 6 | 6 | 6 | 0.05% | 12.60% | MDENQF 3.17<br>VAVTST<br>NAAK                             | 1,741.81 |
| Control | 6011 | DPYSL3 protein                                                           | gi 154426078,gi 155371867              | 73,970.90 | 100.00% | 6 | 6 | 6 | 0.05% | 12.60% | QIGDNLI 2.73<br>VPGGVK                                    | 1,309.75 |

|         |      |                                                                                                                                      |                                             |           |         |   |   |   |       |        |                              |      |          |
|---------|------|--------------------------------------------------------------------------------------------------------------------------------------|---------------------------------------------|-----------|---------|---|---|---|-------|--------|------------------------------|------|----------|
| Control | 6011 | DPYSL3 protein                                                                                                                       | gi 154426078,gi 155371867                   | 73,970.90 | 100.00% | 6 | 6 | 6 | 0.05% | 12.60% | SAADLIS QAR                  | 2.82 | 1,031.55 |
| Control | 6011 | DPYSL3 protein                                                                                                                       | gi 154426078,gi 155371867                   | 73,970.90 | 100.00% | 6 | 6 | 6 | 0.05% | 12.60% | TLDFDA LSVGQR                | 3.13 | 1,321.67 |
| Control | 6011 | RecName : Full=Receptor expression-enhancing protein 5                                                                               | gi 109892956,gi 114053301,gi 88954091       | 21,400.00 | 99.80%  | 2 | 2 | 2 | 0.02% | 12.20% | HESQVD NVVNDL KDK            | 3.59 | 1,739.86 |
| Control | 6011 | RecName : Full=Receptor expression-enhancing protein 5                                                                               | gi 109892956,gi 114053301,gi 88954091       | 21,400.00 | 99.80%  | 2 | 2 | 2 | 0.02% | 12.20% | IIRPFFLK                     | 2.52 | 1,033.66 |
| Control | 6011 | TOMM2 2 protein                                                                                                                      | gi 151556851,gi 154152189                   | 15,275.00 | 99.80%  | 2 | 3 | 4 | 0.03% | 26.40% | LQMEQQ QQLQQR                | 4.62 | 1,557.78 |
| Control | 6011 | TOMM2 2 protein                                                                                                                      | gi 151556851,gi 154152189                   | 15,275.00 | 99.80%  | 2 | 3 | 4 | 0.03% | 26.40% | QILLGPN TGLSGG MPGALP SLPGKI | 4.45 | 2,404.33 |
| Control | 6011 | RecName : Full=Gap junction alpha-1 protein; AltName: Full=Connexin-43; Short=Cx43; AltName: Full=Vascular smooth muscle connexin-43 | gi 117704,gi 162889,gi 27806607,gi 86827705 | 43,170.50 | 99.80%  | 2 | 2 | 2 | 0.02% | 9.40%  | KLDAGH ELQPLAI VDQRPS SR     | 2.71 | 2,330.26 |

|         |      |                                                                                                                                                                                             |                                                                                                                                                         |           |         |    |    |    |       |        |                             |      |          |
|---------|------|---------------------------------------------------------------------------------------------------------------------------------------------------------------------------------------------|---------------------------------------------------------------------------------------------------------------------------------------------------------|-----------|---------|----|----|----|-------|--------|-----------------------------|------|----------|
| Control | 6011 | RecName<br>:<br>Full=Gap<br>junction<br>alpha-1<br>protein;<br>AltName:<br>Full=Con<br>nexin-43;<br>Short=Cx<br>43;<br>AltName:<br>Full=Vas<br>cular<br>smooth<br>muscle<br>connexin-<br>43 | gi 117704.g<br>i 162889.gi<br>27806607.g<br>i 86827705                                                                                                  | 43,170.50 | 99.80%  | 2  | 2  | 2  | 0.02% | 9.40%  | SDPYHT<br>TTGPLSP<br>SK     | 2.4  | 1,587.77 |
| Control | 6011 | RecName<br>:<br>Full=AT<br>P<br>synthase<br>subunit<br>beta,<br>mitochon<br>drial;<br>Flags:<br>Precursor                                                                                   | gi 114543.g<br>i 15842902<br>3,gi 158429<br>024,gi 1584<br>29025,gi 15<br>8431069,gi <br>158431070,<br>gi 1584310<br>71,gi 28461<br>221,gi 9457<br>4271 | 51,687.60 | 100.00% | 16 | 21 | 32 | 0.25% | 55.80% | AIAELGI<br>YPAVDP<br>LDSTSR | 4.73 | 1,988.03 |
| Control | 6011 | RecName<br>:<br>Full=AT<br>P<br>synthase<br>subunit<br>beta,<br>mitochon<br>drial;<br>Flags:<br>Precursor                                                                                   | gi 114543.g<br>i 15842902<br>3,gi 158429<br>024,gi 1584<br>29025,gi 15<br>8431069,gi <br>158431070,<br>gi 1584310<br>71,gi 28461<br>221,gi 9457<br>4271 | 51,687.60 | 100.00% | 16 | 21 | 32 | 0.25% | 55.80% | FLSQPFQ<br>VAEVFT<br>GHLGK  | 3.37 | 2,005.05 |
| Control | 6011 | RecName<br>:<br>Full=AT<br>P<br>synthase<br>subunit<br>beta,<br>mitochon<br>drial;<br>Flags:<br>Precursor                                                                                   | gi 114543.g<br>i 15842902<br>3,gi 158429<br>024,gi 1584<br>29025,gi 15<br>8431069,gi <br>158431070,<br>gi 1584310<br>71,gi 28461<br>221,gi 9457<br>4271 | 51,687.60 | 100.00% | 16 | 21 | 32 | 0.25% | 55.80% | FTQAGS<br>EVSALL<br>GR      | 4.12 | 1,435.75 |
| Control | 6011 | RecName<br>:<br>Full=AT<br>P<br>synthase<br>subunit<br>beta,<br>mitochon<br>drial;<br>Flags:<br>Precursor                                                                                   | gi 114543.g<br>i 15842902<br>3,gi 158429<br>024,gi 1584<br>29025,gi 15<br>8431069,gi <br>158431070,<br>gi 1584310<br>71,gi 28461<br>221,gi 9457<br>4271 | 51,687.60 | 100.00% | 16 | 21 | 32 | 0.25% | 55.80% | IMDPNIV<br>GSEHYD<br>VAR    | 2.93 | 1,831.86 |

|         |      |                                                                                                           |                                                                                                                                                         |           |         |    |    |    |       |        |                                                    |          |
|---------|------|-----------------------------------------------------------------------------------------------------------|---------------------------------------------------------------------------------------------------------------------------------------------------------|-----------|---------|----|----|----|-------|--------|----------------------------------------------------|----------|
| Control | 6011 | RecName<br>:<br>Full=AT<br>P<br>synthase<br>subunit<br>beta,<br>mitochon<br>drial;<br>Flags:<br>Precursor | gi 114543.g<br>i 15842902<br>3,gi 158429<br>024,gi 1584<br>29025,gi 15<br>8431069,gi <br>158431070,<br>gi 1584310<br>71,gi 28461<br>221,gi 9457<br>4271 | 51,687.60 | 100.00% | 16 | 21 | 32 | 0.25% | 55.80% | IMNVIGE 3.25<br>PIDERGP<br>IK                      | 1,796.96 |
| Control | 6011 | RecName<br>:<br>Full=AT<br>P<br>synthase<br>subunit<br>beta,<br>mitochon<br>drial;<br>Flags:<br>Precursor | gi 114543.g<br>i 15842902<br>3,gi 158429<br>024,gi 1584<br>29025,gi 15<br>8431069,gi <br>158431070,<br>gi 1584310<br>71,gi 28461<br>221,gi 9457<br>4271 | 51,687.60 | 100.00% | 16 | 21 | 32 | 0.25% | 55.80% | IPSAVGY 4.54<br>QPTLAT<br>DMGTM<br>QER             | 2,282.08 |
| Control | 6011 | RecName<br>:<br>Full=AT<br>P<br>synthase<br>subunit<br>beta,<br>mitochon<br>drial;<br>Flags:<br>Precursor | gi 114543.g<br>i 15842902<br>3,gi 158429<br>024,gi 1584<br>29025,gi 15<br>8431069,gi <br>158431070,<br>gi 1584310<br>71,gi 28461<br>221,gi 9457<br>4271 | 51,687.60 | 100.00% | 16 | 21 | 32 | 0.25% | 55.80% | IPVGPET 3<br>LGR                                   | 1,038.59 |
| Control | 6011 | RecName<br>:<br>Full=AT<br>P<br>synthase<br>subunit<br>beta,<br>mitochon<br>drial;<br>Flags:<br>Precursor | gi 114543.g<br>i 15842902<br>3,gi 158429<br>024,gi 1584<br>29025,gi 15<br>8431069,gi <br>158431070,<br>gi 1584310<br>71,gi 28461<br>221,gi 9457<br>4271 | 51,687.60 | 100.00% | 16 | 21 | 32 | 0.25% | 55.80% | IVAVIGA 3.73<br>VVDVQF<br>DEGLPPI<br>LNALEV<br>QGR | 3,031.68 |
| Control | 6011 | RecName<br>:<br>Full=AT<br>P<br>synthase<br>subunit<br>beta,<br>mitochon<br>drial;<br>Flags:<br>Precursor | gi 114543.g<br>i 15842902<br>3,gi 158429<br>024,gi 1584<br>29025,gi 15<br>8431069,gi <br>158431070,<br>gi 1584310<br>71,gi 28461<br>221,gi 9457<br>4271 | 51,687.60 | 100.00% | 16 | 21 | 32 | 0.25% | 55.80% | LVLEVA 3.18<br>QHLGES<br>TVR                       | 1,650.92 |



|         |      |                                                                                                           |                                                                                                                                                         |           |         |    |    |    |       |        |                                              |      |          |
|---------|------|-----------------------------------------------------------------------------------------------------------|---------------------------------------------------------------------------------------------------------------------------------------------------------|-----------|---------|----|----|----|-------|--------|----------------------------------------------|------|----------|
| Control | 6011 | RecName<br>:<br>Full=AT<br>P<br>synthase<br>subunit<br>beta,<br>mitochon<br>drial;<br>Flags:<br>Precursor | gi 114543.g<br>i 15842902<br>3,gi 158429<br>024,gi 1584<br>29025,gi 15<br>8431069,gi <br>158431070,<br>gi 1584310<br>71,gi 28461<br>221,gi 9457<br>4271 | 51,687.60 | 100.00% | 16 | 21 | 32 | 0.25% | 55.80% | QFAAIIH<br>AEAPEF<br>VEMSVE<br>QEILVTG<br>IK | 3.78 | 3,002.52 |
| Control | 6011 | RecName<br>:<br>Full=AT<br>P<br>synthase<br>subunit<br>beta,<br>mitochon<br>drial;<br>Flags:<br>Precursor | gi 114543.g<br>i 15842902<br>3,gi 158429<br>024,gi 1584<br>29025,gi 15<br>8431069,gi <br>158431070,<br>gi 1584310<br>71,gi 28461<br>221,gi 9457<br>4271 | 51,687.60 | 100.00% | 16 | 21 | 32 | 0.25% | 55.80% | SLQDIIAI<br>LGMDEL<br>SEEDKL<br>TVSR         | 3.41 | 2,691.38 |
| Control | 6011 | RecName<br>:<br>Full=AT<br>P<br>synthase<br>subunit<br>beta,<br>mitochon<br>drial;<br>Flags:<br>Precursor | gi 114543.g<br>i 15842902<br>3,gi 158429<br>024,gi 1584<br>29025,gi 15<br>8431069,gi <br>158431070,<br>gi 1584310<br>71,gi 28461<br>221,gi 9457<br>4271 | 51,687.60 | 100.00% | 16 | 21 | 32 | 0.25% | 55.80% | TVLIMEL<br>INNVAK                            | 4.15 | 1,473.83 |
| Control | 6011 | RecName<br>:<br>Full=AT<br>P<br>synthase<br>subunit<br>beta,<br>mitochon<br>drial;<br>Flags:<br>Precursor | gi 114543.g<br>i 15842902<br>3,gi 158429<br>024,gi 1584<br>29025,gi 15<br>8431069,gi <br>158431070,<br>gi 1584310<br>71,gi 28461<br>221,gi 9457<br>4271 | 51,687.60 | 100.00% | 16 | 21 | 32 | 0.25% | 55.80% | VALTGL<br>TVAEYF<br>R                        | 4.18 | 1,439.79 |
| Control | 6011 | RecName<br>:<br>Full=AT<br>P<br>synthase<br>subunit<br>beta,<br>mitochon<br>drial;<br>Flags:<br>Precursor | gi 114543.g<br>i 15842902<br>3,gi 158429<br>024,gi 1584<br>29025,gi 15<br>8431069,gi <br>158431070,<br>gi 1584310<br>71,gi 28461<br>221,gi 9457<br>4271 | 51,687.60 | 100.00% | 16 | 21 | 32 | 0.25% | 55.80% | VALVYG<br>QMNEPP<br>GAR                      | 3.21 | 1,617.81 |

|         |      |                                                                                                           |                                                                                                                                                         |           |         |    |    |    |       |        |                                              |      |          |
|---------|------|-----------------------------------------------------------------------------------------------------------|---------------------------------------------------------------------------------------------------------------------------------------------------------|-----------|---------|----|----|----|-------|--------|----------------------------------------------|------|----------|
| Control | 6011 | RecName<br>:<br>Full=AT<br>P<br>synthase<br>subunit<br>beta,<br>mitochon<br>drial;<br>Flags:<br>Precursor | gi 114543.g<br>i 15842902<br>3,gi 158429<br>024,gi 1584<br>29025,gi 15<br>8431069,gi <br>158431070,<br>gi 1584310<br>71,gi 28461<br>221,gi 9457<br>4271 | 51,687.60 | 100.00% | 16 | 21 | 32 | 0.25% | 55.80% | VLDSGA<br>PIRIPVG<br>PETLGR                  | 3.34 | 1,947.10 |
| Control | 6011 | RecName<br>:<br>Full=AT<br>P<br>synthase<br>subunit<br>beta,<br>mitochon<br>drial;<br>Flags:<br>Precursor | gi 114543.g<br>i 15842902<br>3,gi 158429<br>024,gi 1584<br>29025,gi 15<br>8431069,gi <br>158431070,<br>gi 1584310<br>71,gi 28461<br>221,gi 9457<br>4271 | 51,687.60 | 100.00% | 16 | 21 | 32 | 0.25% | 55.80% | VVDLLA<br>PYAK                               | 2.53 | 1,088.64 |
| Control | 6011 | C1H3OR<br>F21<br>protein                                                                                  | gi 1121807<br>40,gi 11549<br>6384                                                                                                                       | 43,819.80 | 99.80%  | 2  | 3  | 3  | 0.02% | 9.16%  | ELFEEFD<br>NFLPGAI<br>IGIAR                  | 2.97 | 2,151.11 |
| Control | 6011 | C1H3OR<br>F21<br>protein                                                                                  | gi 1121807<br>40,gi 11549<br>6384                                                                                                                       | 43,819.80 | 99.80%  | 2  | 3  | 3  | 0.02% | 9.16%  | LLEPAQ<br>VQQLAD<br>KYHFR                    | 2.92 | 2,056.10 |
| Control | 6011 | RecName<br>:<br>Full=Sto<br>matin-<br>like<br>protein 2;<br>Short=SL<br>P-2                               | gi 1185738<br>93,gi 14874<br>5563,gi 816<br>74229,gi 84<br>000113                                                                                       | 38,715.70 | 100.00% | 5  | 6  | 7  | 0.05% | 21.90% | AEQINQ<br>AAGEAS<br>AVLAK                    | 3.94 | 1,670.87 |
| Control | 6011 | RecName<br>:<br>Full=Sto<br>matin-<br>like<br>protein 2;<br>Short=SL<br>P-2                               | gi 1185738<br>93,gi 14874<br>5563,gi 816<br>74229,gi 84<br>000113                                                                                       | 38,715.70 | 100.00% | 5  | 6  | 7  | 0.05% | 21.90% | ASYGVE<br>DPEYAV<br>TQLAQT<br>TMR            | 3.99 | 2,346.09 |
| Control | 6011 | RecName<br>:<br>Full=Sto<br>matin-<br>like<br>protein 2;<br>Short=SL<br>P-2                               | gi 1185738<br>93,gi 14874<br>5563,gi 816<br>74229,gi 84<br>000113                                                                                       | 38,715.70 | 100.00% | 5  | 6  | 7  | 0.05% | 21.90% | ILEPGLN<br>ILIPVLD<br>R                      | 3.23 | 1,675.02 |
| Control | 6011 | RecName<br>:<br>Full=Sto<br>matin-<br>like<br>protein 2;<br>Short=SL<br>P-2                               | gi 1185738<br>93,gi 14874<br>5563,gi 816<br>74229,gi 84<br>000113                                                                                       | 38,715.70 | 100.00% | 5  | 6  | 7  | 0.05% | 21.90% | QAQILAS<br>EAEKAE<br>QINQAA<br>GEASAV<br>LAK | 4.45 | 2,839.48 |

|         |      |                                                                             |                                                                   |            |         |   |   |    |       |        |                                                |      |          |
|---------|------|-----------------------------------------------------------------------------|-------------------------------------------------------------------|------------|---------|---|---|----|-------|--------|------------------------------------------------|------|----------|
| Control | 6011 | RecName<br>:<br>Full=Sto<br>matin-<br>like<br>protein 2;<br>Short=SL<br>P-2 | gi 1185738<br>93,gi 14874<br>5563,gi 816<br>74229,gi 84<br>000113 | 38,715.70  | 100.00% | 5 | 6 | 7  | 0.05% | 21.90% | STDASL<br>DEELDR<br>VK                         | 3.43 | 1,577.77 |
| Control | 6011 | PREDIC<br>TED:<br>similar to<br>CD109,<br>partial                           | gi 1199213<br>75                                                  | 142,518.70 | 100.00% | 5 | 7 | 9  | 0.07% | 6.82%  | IEFPILDD<br>SSELQV<br>K                        | 3.53 | 1,732.90 |
| Control | 6011 | PREDIC<br>TED:<br>similar to<br>CD109,<br>partial                           | gi 1199213<br>75                                                  | 142,518.70 | 100.00% | 5 | 7 | 9  | 0.07% | 6.82%  | LGEVPIT<br>VTAVSP<br>AASDAV<br>TQR             | 5.03 | 2,182.17 |
| Control | 6011 | PREDIC<br>TED:<br>similar to<br>CD109,<br>partial                           | gi 1199213<br>75                                                  | 142,518.70 | 100.00% | 5 | 7 | 9  | 0.07% | 6.82%  | SPVTLT<br>AYIVTSL<br>LGYK                      | 4.67 | 1,826.03 |
| Control | 6011 | PREDIC<br>TED:<br>similar to<br>CD109,<br>partial                           | gi 1199213<br>75                                                  | 142,518.70 | 100.00% | 5 | 7 | 9  | 0.07% | 6.82%  | SYSQSIL<br>LDLTD<br>TLQTTL<br>K                | 3.74 | 2,227.17 |
| Control | 6011 | PREDIC<br>TED:<br>similar to<br>CD109,<br>partial                           | gi 1199213<br>75                                                  | 142,518.70 | 100.00% | 5 | 7 | 9  | 0.07% | 6.82%  | VGSPFEL<br>VVIGNK                              | 4.4  | 1,358.77 |
| Control | 6011 | CHMP4<br>B protein                                                          | gi 1168745<br>09,gi 19036<br>0743                                 | 24,919.20  | 99.80%  | 2 | 2 | 2  | 0.02% | 10.70% | EALENA<br>NTNTEV<br>LK                         | 3.19 | 1,545.78 |
| Control | 6011 | CHMP4<br>B protein                                                          | gi 1168745<br>09,gi 19036<br>0743                                 | 24,919.20  | 99.80%  | 2 | 2 | 2  | 0.02% | 10.70% | KIEQELT<br>AAK                                 | 2.43 | 1,130.64 |
| Control | 6011 | SSR1<br>protein                                                             | gi 1515536<br>10,gi 15612<br>0891,gi 187<br>611488                | 32,036.80  | 100.00% | 4 | 5 | 14 | 0.11% | 21.70% | FLVGFT<br>NK                                   | 2.47 | 925.5142 |
| Control | 6011 | SSR1<br>protein                                                             | gi 1515536<br>10,gi 15612<br>0891,gi 187<br>611488                | 32,036.80  | 100.00% | 4 | 5 | 14 | 0.11% | 21.70% | GEDFPA<br>NNIVK                                | 3.24 | 1,203.60 |
| Control | 6011 | SSR1<br>protein                                                             | gi 1515536<br>10,gi 15612<br>0891,gi 187<br>611488                | 32,036.80  | 100.00% | 4 | 5 | 14 | 0.11% | 21.70% | GTEDFIV<br>ESLDASF<br>R                        | 4.21 | 1,685.80 |
| Control | 6011 | SSR1<br>protein                                                             | gi 1515536<br>10,gi 15612<br>0891,gi 187<br>611488                | 32,036.80  | 100.00% | 4 | 5 | 14 | 0.11% | 21.70% | QATFEY<br>SFIPAEP<br>MGGRPF<br>GLVINLN<br>YK   | 3.24 | 3,175.59 |
| Control | 6011 | EH-<br>domain<br>containin<br>g 2                                           | gi 1140517<br>16,gi 86822<br>020                                  | 61,201.30  | 100.00% | 9 | 9 | 10 | 0.08% | 25.60% | DKSKYD<br>EIFYNLA<br>PADGK                     | 3.02 | 2,074.01 |
| Control | 6011 | EH-<br>domain<br>containin<br>g 2                                           | gi 1140517<br>16,gi 86822<br>020                                  | 61,201.30  | 100.00% | 9 | 9 | 10 | 0.08% | 25.60% | FGTFHSP<br>ALEDAD<br>FDGKPM<br>VLVAGQ<br>YSTGK | 3.32 | 3,201.52 |

|         |      |                                                    |                                                 |            |         |   |   |    |       |        |                                     |          |
|---------|------|----------------------------------------------------|-------------------------------------------------|------------|---------|---|---|----|-------|--------|-------------------------------------|----------|
| Control | 6011 | EH-domain containin g 2                            | gi 114051716,gi 86822020                        | 61,201.30  | 100.00% | 9 | 9 | 10 | 0.08% | 25.60% | GYDFPA VLR 2.16                     | 1,037.54 |
| Control | 6011 | EH-domain containin g 2                            | gi 114051716,gi 86822020                        | 61,201.30  | 100.00% | 9 | 9 | 10 | 0.08% | 25.60% | KLNPFG NTFLNR 2.89                  | 1,420.77 |
| Control | 6011 | EH-domain containin g 2                            | gi 114051716,gi 86822020                        | 61,201.30  | 100.00% | 9 | 9 | 10 | 0.08% | 25.60% | LEGHGL PTNLPR 2.86                  | 1,303.71 |
| Control | 6011 | EH-domain containin g 2                            | gi 114051716,gi 86822020                        | 61,201.30  | 100.00% | 9 | 9 | 10 | 0.08% | 25.60% | LFELEEQ DLFR 3.58                   | 1,438.72 |
| Control | 6011 | EH-domain containin g 2                            | gi 114051716,gi 86822020                        | 61,201.30  | 100.00% | 9 | 9 | 10 | 0.08% | 25.60% | LFELEEQ DLFRDIQ GLPR 3.31           | 2,218.15 |
| Control | 6011 | EH-domain containin g 2                            | gi 114051716,gi 86822020                        | 61,201.30  | 100.00% | 9 | 9 | 10 | 0.08% | 25.60% | LLEALD EMLTHD IAK 3.66              | 1,727.89 |
| Control | 6011 | EH-domain containin g 2                            | gi 114051716,gi 86822020                        | 61,201.30  | 100.00% | 9 | 9 | 10 | 0.08% | 25.60% | LSDVDR DGMLDD EEFALAS HLIEAK 2.53   | 2,805.33 |
| Control | 6011 | Adaptor-related protein complex 2, alpha 2 subunit | gi 111304969,gi 115496658,gi 122142416          | 103,753.40 | 99.80%  | 2 | 2 | 2  | 0.02% | 2.99%  | GLAVFIS DIR 3.32                    | 1,090.63 |
| Control | 6011 | Adaptor-related protein complex 2, alpha 2 subunit | gi 111304969,gi 115496658,gi 122142416          | 103,753.40 | 99.80%  | 2 | 2 | 2  | 0.02% | 2.99%  | VGGYIL GEFGNLI AGDPR 2.36           | 1,847.97 |
| Control | 6011 | GTP-binding protein MX2                            | gi 13430404,gi 27806835,gi 75066885             | 81,436.40  | 100.00% | 5 | 7 | 11 | 0.09% | 13.20% | ALGVEQ DLALPAI AVIGDQ SSGK 4.52     | 2,252.21 |
| Control | 6011 | GTP-binding protein MX2                            | gi 13430404,gi 27806835,gi 75066885             | 81,436.40  | 100.00% | 5 | 7 | 11 | 0.09% | 13.20% | ATEELQ QYGDDI PSDEGD KMFFLIE K 3.69 | 3,034.39 |
| Control | 6011 | GTP-binding protein MX2                            | gi 13430404,gi 27806835,gi 75066885             | 81,436.40  | 100.00% | 5 | 7 | 11 | 0.09% | 13.20% | LTQAQQ ALYAFP HFKG 4.31             | 1,877.95 |
| Control | 6011 | GTP-binding protein MX2                            | gi 13430404,gi 27806835,gi 75066885             | 81,436.40  | 100.00% | 5 | 7 | 11 | 0.09% | 13.20% | SSVLEAL SGVALP R 4.36               | 1,398.80 |
| Control | 6011 | GTP-binding protein MX2                            | gi 13430404,gi 27806835,gi 75066885             | 81,436.40  | 100.00% | 5 | 7 | 11 | 0.09% | 13.20% | VAVENQ PQDIGLQ IK 4.63              | 1,651.90 |
| Control | 6011 | coiled-coil-helix domain containin g 3             | gi 59858339,gi 62510470,gi 74354006,gi 78365273 | 26,082.40  | 100.00% | 5 | 7 | 11 | 0.09% | 11.00% | KQDAFY KEQLAR 3.93                  | 1,496.79 |

|         |      |                                                                                                                                     |           |         |   |    |    |       |        |                                          |      |          |
|---------|------|-------------------------------------------------------------------------------------------------------------------------------------|-----------|---------|---|----|----|-------|--------|------------------------------------------|------|----------|
| Control | 6011 | coiled-coil-helix-9,gi 5985833<br>coiled-coil-helix-70,gi 74354<br>coiled-coil-helix-006,gi 7836<br>domain 5273<br>containin<br>g 3 | 26,082.40 | 100.00% | 5 | 7  | 11 | 0.09% | 11.00% | RVAEEL<br>ALEQAK                         | 3.09 | 1,356.75 |
| Control | 6011 | coiled-coil-helix-9,gi 5985833<br>coiled-coil-helix-70,gi 74354<br>coiled-coil-helix-006,gi 7836<br>domain 5273<br>containin<br>g 3 | 26,082.40 | 100.00% | 5 | 7  | 11 | 0.09% | 11.00% | RVAEEL<br>ALEQAK<br>K                    | 5.12 | 1,484.84 |
| Control | 6011 | coiled-coil-helix-9,gi 5985833<br>coiled-coil-helix-70,gi 74354<br>coiled-coil-helix-006,gi 7836<br>domain 5273<br>containin<br>g 3 | 26,082.40 | 100.00% | 5 | 7  | 11 | 0.09% | 11.00% | VAEELA<br>LEQAK                          | 4.38 | 1,200.65 |
| Control | 6011 | coiled-coil-helix-9,gi 5985833<br>coiled-coil-helix-70,gi 74354<br>coiled-coil-helix-006,gi 7836<br>domain 5273<br>containin<br>g 3 | 26,082.40 | 100.00% | 5 | 7  | 11 | 0.09% | 11.00% | VAEELA<br>LEQAKK                         | 3.59 | 1,328.74 |
| Control | 6011 | integrin beta 1<br>gi 1111831<br>55,gi 21856<br>3327                                                                                | 88,075.70 | 100.00% | 8 | 11 | 26 | 0.20% | 15.80% | AEDYPID<br>LYYLM<br>LSYSMK<br>DLENV<br>K | 3.04 | 3,159.44 |
| Control | 6011 | integrin beta 1<br>gi 1111831<br>55,gi 21856<br>3327                                                                                | 88,075.70 | 100.00% | 8 | 11 | 26 | 0.20% | 15.80% | IGFGSFV<br>EK                            | 2.25 | 983.5197 |
| Control | 6011 | integrin beta 1<br>gi 1111831<br>55,gi 21856<br>3327                                                                                | 88,075.70 | 100.00% | 8 | 11 | 26 | 0.20% | 15.80% | LPEGVTI<br>NYK                           | 3.05 | 1,133.62 |
| Control | 6011 | integrin beta 1<br>gi 1111831<br>55,gi 21856<br>3327                                                                                | 88,075.70 | 100.00% | 8 | 11 | 26 | 0.20% | 15.80% | LQPEDIT<br>QIQPQL<br>VLQLR               | 5.83 | 2,260.27 |
| Control | 6011 | integrin beta 1<br>gi 1111831<br>55,gi 21856<br>3327                                                                                | 88,075.70 | 100.00% | 8 | 11 | 26 | 0.20% | 15.80% | LSENNIQ<br>TIFAVTE<br>EFQPVY<br>K        | 4.42 | 2,470.25 |
| Control | 6011 | integrin beta 1<br>gi 1111831<br>55,gi 21856<br>3327                                                                                | 88,075.70 | 100.00% | 8 | 11 | 26 | 0.20% | 15.80% | NVLSLT<br>DKGEVF<br>NELVGK               | 5.9  | 1,962.05 |
| Control | 6011 | integrin beta 1<br>gi 1111831<br>55,gi 21856<br>3327                                                                                | 88,075.70 | 100.00% | 8 | 11 | 26 | 0.20% | 15.80% | SLGTDL<br>MNEMR                          | 2.53 | 1,282.58 |
| Control | 6011 | integrin beta 1<br>gi 1111831<br>55,gi 21856<br>3327                                                                                | 88,075.70 | 100.00% | 8 | 11 | 26 | 0.20% | 15.80% | TVMPYI<br>STTPAK                         | 3.38 | 1,324.68 |

|         |      |                                                                                                                                                                                                                                                                  |           |         |   |   |    |       |        |                        |      |          |
|---------|------|------------------------------------------------------------------------------------------------------------------------------------------------------------------------------------------------------------------------------------------------------------------|-----------|---------|---|---|----|-------|--------|------------------------|------|----------|
| Control | 6011 | RecName gi 1312445 :<br>: 2,gi 148878<br>Full=Volt 077,gi 2780<br>age- 7415,gi 881<br>dependen 0224<br>t anion-<br>selective<br>channel<br>protein 3;<br>Short=V<br>DAC-3;<br>AltName:<br>Full=Out<br>er<br>mitochon<br>drial<br>membran<br>e protein<br>porin 3 | 30,853.30 | 100.00% | 5 | 7 | 11 | 0.09% | 20.10% | LSQNNF<br>ALGYK        | 4.01 | 1,254.65 |
| Control | 6011 | RecName gi 1312445 :<br>: 2,gi 148878<br>Full=Volt 077,gi 2780<br>age- 7415,gi 881<br>dependen 0224<br>t anion-<br>selective<br>channel<br>protein 3;<br>Short=V<br>DAC-3;<br>AltName:<br>Full=Out<br>er<br>mitochon<br>drial<br>membran<br>e protein<br>porin 3 | 30,853.30 | 100.00% | 5 | 7 | 11 | 0.09% | 20.10% | LTLDTIF<br>VPNTGK      | 3.42 | 1,418.79 |
| Control | 6011 | RecName gi 1312445 :<br>: 2,gi 148878<br>Full=Volt 077,gi 2780<br>age- 7415,gi 881<br>dependen 0224<br>t anion-<br>selective<br>channel<br>protein 3;<br>Short=V<br>DAC-3;<br>AltName:<br>Full=Out<br>er<br>mitochon<br>drial<br>membran<br>e protein<br>porin 3 | 30,853.30 | 100.00% | 5 | 7 | 11 | 0.09% | 20.10% | LTLDTIF<br>VPNTGK<br>K | 3.86 | 1,546.88 |

|         |      |                                                                                                                                                                                                                                                                |            |           |         |   |    |       |        |                                  |                                             |          |          |
|---------|------|----------------------------------------------------------------------------------------------------------------------------------------------------------------------------------------------------------------------------------------------------------------|------------|-----------|---------|---|----|-------|--------|----------------------------------|---------------------------------------------|----------|----------|
| Control | 6011 | RecName gi 1312445 :<br>2,gi 148878<br>Full=Volt 077,gi 2780<br>age- 7415,gi 881<br>dependen 0224<br>t anion-<br>selective<br>channel<br>protein 3;<br>Short=V<br>DAC-3;<br>AltName:<br>Full=Out<br>er<br>mitochon<br>drial<br>membran<br>e protein<br>porin 3 | 30,853.30  | 100.00%   | 5       | 7 | 11 | 0.09% | 20.10% | LTLSALI<br>DGK                   | 3.74                                        | 1,030.61 |          |
| Control | 6011 | RecName gi 1312445 :<br>2,gi 148878<br>Full=Volt 077,gi 2780<br>age- 7415,gi 881<br>dependen 0224<br>t anion-<br>selective<br>channel<br>protein 3;<br>Short=V<br>DAC-3;<br>AltName:<br>Full=Out<br>er<br>mitochon<br>drial<br>membran<br>e protein<br>porin 3 | 30,853.30  | 100.00%   | 5       | 7 | 11 | 0.09% | 20.10% | SKLSQN<br>NFALGY<br>K            | 4.17                                        | 1,469.77 |          |
| Control | 6011 | RecName gi 1312445 :<br>2,gi 148878<br>Full=Volt 077,gi 2780<br>age- 7415,gi 881<br>dependen 0224<br>t anion-<br>selective<br>channel<br>protein 3;<br>Short=V<br>DAC-3;<br>AltName:<br>Full=Out<br>er<br>mitochon<br>drial<br>membran<br>e protein<br>porin 3 | 30,853.30  | 100.00%   | 5       | 7 | 11 | 0.09% | 20.10% | VNNASLI<br>GLGYTQ<br>TLRPGV<br>K | 4.61                                        | 2,101.18 |          |
| Control | 6011 | SLC25A<br>3 protein 64                                                                                                                                                                                                                                         | gi 1515560 | 39,986.50 | 100.00% | 5 | 9  | 22    | 0.17%  | 17.20%                           | FGFYEV<br>FK                                | 2.24     | 1,036.51 |
| Control | 6011 | SLC25A<br>3 protein 64                                                                                                                                                                                                                                         | gi 1515560 | 39,986.50 | 100.00% | 5 | 9  | 22    | 0.17%  | 17.20%                           | FYALCG<br>FGGVLS<br>CGLTHT<br>AVVPLD<br>LVK | 3.62     | 2,780.45 |

|         |      |                                                                                    |                                                                                      |           |         |   |   |    |       |        |                                    |      |          |
|---------|------|------------------------------------------------------------------------------------|--------------------------------------------------------------------------------------|-----------|---------|---|---|----|-------|--------|------------------------------------|------|----------|
| Control | 6011 | SLC25A3 protein                                                                    | gi 151556064                                                                         | 39,986.50 | 100.00% | 5 | 9 | 22 | 0.17% | 17.20% | IQTQPGY                            | 3.82 | 1,361.72 |
| Control | 6011 | SLC25A3 protein                                                                    | gi 151556064                                                                         | 39,986.50 | 100.00% | 5 | 9 | 22 | 0.17% | 17.20% | ANTLR<br>LPRPPPP<br>EMPESL<br>K    | 4.98 | 1,603.85 |
| Control | 6011 | SLC25A3 protein                                                                    | gi 151556064                                                                         | 39,986.50 | 100.00% | 5 | 9 | 22 | 0.17% | 17.20% | LPRPPPP<br>EMPESL<br>KK            | 3.09 | 1,731.95 |
| Control | 6011 | ALCAM/CD166                                                                        | gi 13111304,gi 41386784,gi 47605539                                                  | 64,749.10 | 100.00% | 2 | 2 | 2  | 0.02% | 4.29%  | SSNTYT<br>LTDVKR                   | 2.73 | 1,384.71 |
| Control | 6011 | ALCAM/CD166                                                                        | gi 13111304,gi 41386784,gi 47605539                                                  | 64,749.10 | 100.00% | 2 | 2 | 2  | 0.02% | 4.29%  | VFKQPS<br>KPEIVSK                  | 2.62 | 1,486.86 |
| Control | 6011 | Myxovirus (influenza virus) resistance 1, interferon-inducible protein p78 (mouse) | gi 109659140,gi 27806841,gi 28372116,gi 2920652,gi 3041,6232,gi 33111880,gi 68067472 | 74,789.50 | 100.00% | 4 | 5 | 5  | 0.04% | 9.57%  | IEDIRLE<br>QENEAE<br>K             | 2.22 | 1,715.84 |
| Control | 6011 | Myxovirus (influenza virus) resistance 1, interferon-inducible protein p78 (mouse) | gi 109659140,gi 27806841,gi 28372116,gi 2920652,gi 3041,6232,gi 33111880,gi 68067472 | 74,789.50 | 100.00% | 4 | 5 | 5  | 0.04% | 9.57%  | QETINLV<br>VVPANV<br>DIATTEA<br>LR | 3.46 | 2,366.29 |
| Control | 6011 | Myxovirus (influenza virus) resistance 1, interferon-inducible protein p78 (mouse) | gi 109659140,gi 27806841,gi 28372116,gi 2920652,gi 3041,6232,gi 33111880,gi 68067472 | 74,789.50 | 100.00% | 4 | 5 | 5  | 0.04% | 9.57%  | SKIEDIR<br>LEQENE<br>AEK           | 3.15 | 1,930.97 |
| Control | 6011 | Myxovirus (influenza virus) resistance 1, interferon-inducible protein p78 (mouse) | gi 109659140,gi 27806841,gi 28372116,gi 2920652,gi 3041,6232,gi 33111880,gi 68067472 | 74,789.50 | 100.00% | 4 | 5 | 5  | 0.04% | 9.57%  | SSVLEAL<br>SGVALP<br>R             | 4.36 | 1,398.80 |



|         |      |                                                                                                                                                                        |                                                                                                                |           |         |   |   |   |       |        |                                |          |
|---------|------|------------------------------------------------------------------------------------------------------------------------------------------------------------------------|----------------------------------------------------------------------------------------------------------------|-----------|---------|---|---|---|-------|--------|--------------------------------|----------|
| Control | 6011 | Myxovirus<br>s<br>(influenza<br>virus)<br>resistance<br>1,<br>interferon-<br>inducible<br>protein<br>p78<br>(mouse)                                                    | gi 1096591<br>40,gi 27806<br>841,gi 2837<br>2116,gi 292<br>0652,gi 304<br>6232,gi 331<br>11880,gi 68<br>067472 | 74,789.50 | 100.00% | 4 | 5 | 5 | 0.04% | 9.57%  | TLPLEN 2.01<br>QIK             | 1,168.69 |
| Control | 6011 | RecName<br>:<br>Full=40S<br>ribosomal<br>protein<br>SA;<br>AltName:<br>Full=Lam<br>inin<br>receptor<br>1;<br>AltName:<br>Full=p40;<br>AltName:<br>Full=Prot<br>ein C10 | gi 1220660<br>07,gi 28189<br>773,gi 7358<br>7277                                                               | 18,591.70 | 100.00% | 4 | 5 | 5 | 0.04% | 35.70% | AIVAIEN 2.95<br>PADVSVI<br>SSR | 1,740.95 |
| Control | 6011 | RecName<br>:<br>Full=40S<br>ribosomal<br>protein<br>SA;<br>AltName:<br>Full=Lam<br>inin<br>receptor<br>1;<br>AltName:<br>Full=p40;<br>AltName:<br>Full=Prot<br>ein C10 | gi 1220660<br>07,gi 28189<br>773,gi 7358<br>7277                                                               | 18,591.70 | 100.00% | 4 | 5 | 5 | 0.04% | 35.70% | FAAATG 4.18<br>ATPIAGR         | 1,203.65 |

|         |      |                                                                                                                                                |                                         |           |        |   |   |       |        |                                     |                                  |          |          |
|---------|------|------------------------------------------------------------------------------------------------------------------------------------------------|-----------------------------------------|-----------|--------|---|---|-------|--------|-------------------------------------|----------------------------------|----------|----------|
| Control | 6011 | RecName gi 1220660 : 07.gi 28189 Full=40S ribosomal protein SA; AltName: Full=Laminin receptor 1; AltName: Full=p40; AltName: Full=Protein C10 | 18,591.70                               | 100.00%   | 4      | 5 | 5 | 0.04% | 35.70% | FLAAGT<br>HLGGTN<br>LDFQME<br>QYIYK | 3.66                             | 2,633.27 |          |
| Control | 6011 | RecName gi 1220660 : 07.gi 28189 Full=40S ribosomal protein SA; AltName: Full=Laminin receptor 1; AltName: Full=p40; AltName: Full=Protein C10 | 18,591.70                               | 100.00%   | 4      | 5 | 5 | 0.04% | 35.70% | LLVVTD<br>PR                        | 1.77                             | 912.5514 |          |
| Control | 6011 | alpha isoform of regulator y subunit A, protein phosphatase 2                                                                                  | gi 1462317 14.gi 79153 525.gi 8269 7383 | 65,273.60 | 99.80% | 2 | 2 | 2     | 0.02%  | 5.60%                               | IGPILDN<br>STLQSE<br>VKPVLE<br>K | 3.07     | 2,180.22 |
| Control | 6011 | alpha isoform of regulator y subunit A, protein phosphatase 2                                                                                  | gi 1462317 14.gi 79153 525.gi 8269 7383 | 65,273.60 | 99.80% | 2 | 2 | 2     | 0.02%  | 5.60%                               | VLAMSG<br>DPNYLH<br>R            | 2.65     | 1,488.73 |

|         |      |                                                                                                                                                                                                                                                         |           |         |   |   |   |       |        |                                 |      |          |
|---------|------|---------------------------------------------------------------------------------------------------------------------------------------------------------------------------------------------------------------------------------------------------------|-----------|---------|---|---|---|-------|--------|---------------------------------|------|----------|
| Control | 6011 | tyrosine 3-gi 2780736<br>monoxy 7-gi 455790<br>genase/tr 8-gi 455791<br>yptophan 3-gi 455791<br>5- 4-gi 455791<br>monoxy 5-gi 455791<br>genase 6-gi 493027<br>activation 3-gi 493027<br>protein, 4-gi 520008<br>zeta 86-gi 73587<br>polypepti 275<br>de | 27,727.90 | 100.00% | 3 | 4 | 5 | 0.04% | 19.60% | GIVDQS<br>QQAYQE<br>AFEISK      | 4.31 | 2,040.99 |
| Control | 6011 | tyrosine 3-gi 2780736<br>monoxy 7-gi 455790<br>genase/tr 8-gi 455791<br>yptophan 3-gi 455791<br>5- 4-gi 455791<br>monoxy 5-gi 455791<br>genase 6-gi 493027<br>activation 3-gi 493027<br>protein, 4-gi 520008<br>zeta 86-gi 73587<br>polypepti 275<br>de | 27,727.90 | 100.00% | 3 | 4 | 5 | 0.04% | 19.60% | LAEQAE<br>RYDDM<br>AACMK        | 4.71 | 1,860.79 |
| Control | 6011 | tyrosine 3-gi 2780736<br>monoxy 7-gi 455790<br>genase/tr 8-gi 455791<br>yptophan 3-gi 455791<br>5- 4-gi 455791<br>monoxy 5-gi 455791<br>genase 6-gi 493027<br>activation 3-gi 493027<br>protein, 4-gi 520008<br>zeta 86-gi 73587<br>polypepti 275<br>de | 27,727.90 | 100.00% | 3 | 4 | 5 | 0.04% | 19.60% | SVTEQG<br>AELSNE<br>ER          | 4.84 | 1,548.71 |
| Control | 6011 | PREDIC gi 1199199<br>TED: 84-gi 61553<br>similar to 181-gi 6246<br>ribosomal 0552-gi 716<br>protein 49267<br>L7                                                                                                                                         | 29,152.80 | 100.00% | 5 | 5 | 5 | 0.04% | 16.50% | IALTDNA<br>LIAR                 | 3.66 | 1,170.68 |
| Control | 6011 | PREDIC gi 1199199<br>TED: 84-gi 61553<br>similar to 181-gi 6246<br>ribosomal 0552-gi 716<br>protein 49267<br>L7                                                                                                                                         | 29,152.80 | 100.00% | 5 | 5 | 5 | 0.04% | 16.50% | KVPAVP<br>ETLK                  | 2.41 | 1,081.66 |
| Control | 6011 | PREDIC gi 1199199<br>TED: 84-gi 61553<br>similar to 181-gi 6246<br>ribosomal 0552-gi 716<br>protein 49267<br>L7                                                                                                                                         | 29,152.80 | 100.00% | 5 | 5 | 5 | 0.04% | 16.50% | KVPAVP<br>ETLKK                 | 3.12 | 1,209.76 |
| Control | 6011 | PREDIC gi 1199199<br>TED: 84-gi 61553<br>similar to 181-gi 6246<br>ribosomal 0552-gi 716<br>protein 49267<br>L7                                                                                                                                         | 29,152.80 | 100.00% | 5 | 5 | 5 | 0.04% | 16.50% | TTHFVE<br>GGDAGN<br>REDQIN<br>R | 3.43 | 2,115.98 |
| Control | 6011 | PREDIC gi 1199199<br>TED: 84-gi 61553<br>similar to 181-gi 6246<br>ribosomal 0552-gi 716<br>protein 49267<br>L7                                                                                                                                         | 29,152.80 | 100.00% | 5 | 5 | 5 | 0.04% | 16.50% | VPAVPE<br>TLKK                  | 2.36 | 1,081.66 |

|         |      |                                                               |                                                                                     |           |         |   |   |   |       |        |                                                   |          |
|---------|------|---------------------------------------------------------------|-------------------------------------------------------------------------------------|-----------|---------|---|---|---|-------|--------|---------------------------------------------------|----------|
| Control | 6011 | 90-kDa<br>heat<br>shock<br>protein<br>alpha                   | gi 3439234<br>3,gi 605927<br>92,gi 75072<br>500                                     | 84,716.20 | 100.00% | 5 | 6 | 6 | 0.05% | 14.70% | ADLINNL 3.99<br>GTIAK                             | 1,242.71 |
| Control | 6011 | 90-kDa<br>heat<br>shock<br>protein<br>alpha                   | gi 3439234<br>3,gi 605927<br>92,gi 75072<br>500                                     | 84,716.20 | 100.00% | 5 | 6 | 6 | 0.05% | 14.70% | GVVDSE 4.24<br>DLPLNIS<br>R                       | 1,513.79 |
| Control | 6011 | 90-kDa<br>heat<br>shock<br>protein<br>alpha                   | gi 3439234<br>3,gi 605927<br>92,gi 75072<br>500                                     | 84,716.20 | 100.00% | 5 | 6 | 6 | 0.05% | 14.70% | HLEINPD 3.21<br>HSIHETL<br>R                      | 1,786.94 |
| Control | 6011 | 90-kDa<br>heat<br>shock<br>protein<br>alpha                   | gi 3439234<br>3,gi 605927<br>92,gi 75072<br>500                                     | 84,716.20 | 100.00% | 5 | 6 | 6 | 0.05% | 14.70% | HSQFIGY 4.51<br>PITLFVE<br>K                      | 1,778.95 |
| Control | 6011 | 90-kDa<br>heat<br>shock<br>protein<br>alpha                   | gi 3439234<br>3,gi 605927<br>92,gi 75072<br>500                                     | 84,716.20 | 100.00% | 5 | 6 | 6 | 0.05% | 14.70% | NPDDITN 3.82<br>EEYGEF<br>YK                      | 1,833.78 |
| Control | 6011 | 90-kDa<br>heat<br>shock<br>protein<br>alpha                   | gi 3439234<br>3,gi 605927<br>92,gi 75072<br>500                                     | 84,716.20 | 100.00% | 5 | 6 | 6 | 0.05% | 14.70% | RAPFDLF 2.91<br>ENR                               | 1,264.64 |
| Control | 6011 | 90-kDa<br>heat<br>shock<br>protein<br>alpha                   | gi 3439234<br>3,gi 605927<br>92,gi 75072<br>500                                     | 84,716.20 | 100.00% | 5 | 6 | 6 | 0.05% | 14.70% | TLTIVDT 4.26<br>GIGMTK                            | 1,365.73 |
| Control | 6011 | 90-kDa<br>heat<br>shock<br>protein<br>alpha                   | gi 3439234<br>3,gi 605927<br>92,gi 75072<br>500                                     | 84,716.20 | 100.00% | 5 | 6 | 6 | 0.05% | 14.70% | YESLTD 4.04<br>PSKLDS<br>GK                       | 1,539.75 |
| Control | 6011 | PREDIC<br>TED:<br>similar to<br>histone<br>cluster 1,<br>H2bd | gi 1199157<br>07,gi 11991<br>5717,gi 119<br>915727,gi 1<br>19936491,g<br>i 82697375 | 13,888.60 | 100.00% | 2 | 2 | 6 | 0.05% | 19.80% | AMGIMN 4.5<br>SFVNDIF<br>ER                       | 1,759.81 |
| Control | 6011 | PREDIC<br>TED:<br>similar to<br>histone<br>cluster 1,<br>H2bd | gi 1199157<br>07,gi 11991<br>5717,gi 119<br>915727,gi 1<br>19936491,g<br>i 82697375 | 13,888.60 | 100.00% | 2 | 2 | 6 | 0.05% | 19.80% | KESYSV 3.28<br>YVYK                               | 1,265.64 |
| Control | 6011 | pyruvate<br>kinase 3                                          | gi 1462317<br>36,gi 19467<br>0470,gi 735<br>87283                                   | 61,410.20 | 100.00% | 6 | 6 | 7 | 0.05% | 15.00% | EATESFA 2.23<br>SDPILYR<br>PVAVAL<br>DTK          | 2,493.29 |
| Control | 6011 | pyruvate<br>kinase 3                                          | gi 1462317<br>36,gi 19467<br>0470,gi 735<br>87283                                   | 61,410.20 | 100.00% | 6 | 6 | 7 | 0.05% | 15.00% | EATESFA 4.96<br>SDPILYR<br>PVAVAL<br>DTKGPEI<br>R | 3,045.59 |
| Control | 6011 | pyruvate<br>kinase 3                                          | gi 1462317<br>36,gi 19467<br>0470,gi 735<br>87283                                   | 61,410.20 | 100.00% | 6 | 6 | 7 | 0.05% | 15.00% | GDLGIEI 3.1<br>PAEK                               | 1,141.61 |

|         |      |                                                                                         |                                       |           |         |   |    |    |       |        |                                    |      |          |
|---------|------|-----------------------------------------------------------------------------------------|---------------------------------------|-----------|---------|---|----|----|-------|--------|------------------------------------|------|----------|
| Control | 6011 | pyruvate kinase 3                                                                       | gi 146231736,gi 194670470,gi 73587283 | 61,410.20 | 100.00% | 6 | 6  | 7  | 0.05% | 15.00% | IYVDDG<br>LISLLVK                  | 4.08 | 1,447.84 |
| Control | 6011 | pyruvate kinase 3                                                                       | gi 146231736,gi 194670470,gi 73587283 | 61,410.20 | 100.00% | 6 | 6  | 7  | 0.05% | 15.00% | LDIDSPPI<br>TAR                    | 3.34 | 1,197.65 |
| Control | 6011 | pyruvate kinase 3                                                                       | gi 146231736,gi 194670470,gi 73587283 | 61,410.20 | 100.00% | 6 | 6  | 7  | 0.05% | 15.00% | LSPITSD<br>PTEAAA<br>VGAVEA<br>SFK | 3.08 | 2,161.10 |
| Control | 6011 | guanine nucleotide binding protein (G protein), alpha inhibiting activity polypeptide 2 | gi 198282135                          | 40,460.10 | 100.00% | 9 | 11 | 30 | 0.23% | 29.90% | AMGNLQ<br>IDFADPS<br>R             | 4.15 | 1,550.73 |
| Control | 6011 | guanine nucleotide binding protein (G protein), alpha inhibiting activity polypeptide 2 | gi 198282135                          | 40,460.10 | 100.00% | 9 | 11 | 30 | 0.23% | 29.90% | AMGNLQ<br>IDFADPS<br>RADDAR        | 2.41 | 2,078.96 |
| Control | 6011 | guanine nucleotide binding protein (G protein), alpha inhibiting activity polypeptide 2 | gi 198282135                          | 40,460.10 | 100.00% | 9 | 11 | 30 | 0.23% | 29.90% | AVVYSN<br>TIQSIMA<br>IVK           | 3.66 | 1,752.96 |
| Control | 6011 | guanine nucleotide binding protein (G protein), alpha inhibiting activity polypeptide 2 | gi 198282135                          | 40,460.10 | 100.00% | 9 | 11 | 30 | 0.23% | 29.90% | EYQLND<br>SAAYYL<br>NDLER          | 5.03 | 2,076.95 |
| Control | 6011 | guanine nucleotide binding protein (G protein), alpha inhibiting activity polypeptide 2 | gi 198282135                          | 40,460.10 | 100.00% | 9 | 11 | 30 | 0.23% | 29.90% | IAQSDYI<br>PTQQDV<br>LR            | 3.58 | 1,746.90 |

|         |      |                                                                                         |                                                  |           |         |   |    |    |       |        |                                 |      |          |
|---------|------|-----------------------------------------------------------------------------------------|--------------------------------------------------|-----------|---------|---|----|----|-------|--------|---------------------------------|------|----------|
| Control | 6011 | guanine nucleotide binding protein (G protein), alpha inhibiting activity polypeptide 2 | gi 198282135                                     | 40,460.10 | 100.00% | 9 | 11 | 30 | 0.23% | 29.90% | LLLLGA<br>GESGK                 | 3.47 | 1,057.63 |
| Control | 6011 | guanine nucleotide binding protein (G protein), alpha inhibiting activity polypeptide 2 | gi 198282135                                     | 40,460.10 | 100.00% | 9 | 11 | 30 | 0.23% | 29.90% | NVQFVF<br>DAVTDV<br>IHK         | 2.94 | 1,707.93 |
| Control | 6011 | guanine nucleotide binding protein (G protein), alpha inhibiting activity polypeptide 2 | gi 198282135                                     | 40,460.10 | 100.00% | 9 | 11 | 30 | 0.23% | 29.90% | SREYQL<br>NDSAAY<br>YLNDLE<br>R | 5.19 | 2,320.08 |
| Control | 6011 | guanine nucleotide binding protein (G protein), alpha inhibiting activity polypeptide 2 | gi 198282135                                     | 40,460.10 | 100.00% | 9 | 11 | 30 | 0.23% | 29.90% | YDEAAS<br>YIQSK                 | 2.76 | 1,274.59 |
| Control | 6011 | Paraoxonase 2                                                                           | gi 109939919,gi 61553203,gi 61888862,gi 71648804 | 39,404.60 | 100.00% | 6 | 8  | 9  | 0.07% | 22.90% | FEEEEENS<br>LLHLK               | 2.54 | 1,487.74 |
| Control | 6011 | Paraoxonase 2                                                                           | gi 109939919,gi 61553203,gi 61888862,gi 71648804 | 39,404.60 | 100.00% | 6 | 8  | 9  | 0.07% | 22.90% | LLALSLL<br>GIALALL<br>GER       | 3.93 | 1,736.10 |
| Control | 6011 | Paraoxonase 2                                                                           | gi 109939919,gi 61553203,gi 61888862,gi 71648804 | 39,404.60 | 100.00% | 6 | 8  | 9  | 0.07% | 22.90% | LLIGTLY<br>HR                   | 2.13 | 1,085.65 |
| Control | 6011 | Paraoxonase 2                                                                           | gi 109939919,gi 61553203,gi 61888862,gi 71648804 | 39,404.60 | 100.00% | 6 | 8  | 9  | 0.07% | 22.90% | NTVEIFK<br>FEEEEENS<br>LLHLK    | 3.91 | 2,319.19 |
| Control | 6011 | Paraoxonase 2                                                                           | gi 109939919,gi 61553203,gi 61888862,gi 71648804 | 39,404.60 | 100.00% | 6 | 8  | 9  | 0.07% | 22.90% | VVAEGF<br>DSANGI<br>NISPDKK     | 3.29 | 1,961.00 |

|         |      |                                                                                            |                                                                |           |         |   |   |   |       |        |                                                     |          |
|---------|------|--------------------------------------------------------------------------------------------|----------------------------------------------------------------|-----------|---------|---|---|---|-------|--------|-----------------------------------------------------|----------|
| Control | 6011 | Paraoxonase 2                                                                              | gi 109939919,gi 61553203,gi 61888862,gi 71648804               | 39,404.60 | 100.00% | 6 | 8 | 9 | 0.07% | 22.90% | YIYVADI 2.71<br>LAHEIHV<br>LEK                      | 2,026.10 |
| Control | 6011 | FOLH1 protein                                                                              | gi 151553958,gi 156120365                                      | 84,574.90 | 99.80%  | 2 | 2 | 2 | 0.02% | 3.73%  | IPHLAGT 3.29<br>EQNFQL<br>AK                        | 1,666.89 |
| Control | 6011 | FOLH1 protein                                                                              | gi 151553958,gi 156120365                                      | 84,574.90 | 99.80%  | 2 | 2 | 2 | 0.02% | 3.73%  | LQDLDK 2.19<br>NNPILLR                              | 1,551.89 |
| Control | 6011 | ILVBL protein                                                                              | gi 151557079,gi 154426224,gi 166233819,gi 59857973,gi 62751470 | 68,205.30 | 99.80%  | 2 | 2 | 2 | 0.02% | 5.85%  | AAQGLG 3.85<br>AQGLLL<br>SR                         | 1,354.78 |
| Control | 6011 | ILVBL protein                                                                              | gi 151557079,gi 154426224,gi 166233819,gi 59857973,gi 62751470 | 68,205.30 | 99.80%  | 2 | 2 | 2 | 0.02% | 5.85%  | NAQIAQ 3.45<br>SPVLLLG<br>GAASTL<br>LQNR            | 2,335.31 |
| Control | 6011 | RecName : Full=Component 1 Q subcomponent-binding protein, mitochondrial; Flags: Precursor | gi 115311784,gi 74354078,gi 77736001                           | 30,588.80 | 100.00% | 3 | 5 | 6 | 0.05% | 19.40% | AEEQEP 3.13<br>ELTSTPN<br>FVVEVT<br>K               | 2,247.10 |
| Control | 6011 | RecName : Full=Component 1 Q subcomponent-binding protein, mitochondrial; Flags: Precursor | gi 115311784,gi 74354078,gi 77736001                           | 30,588.80 | 100.00% | 3 | 5 | 6 | 0.05% | 19.40% | GVDNTF 4.52<br>ADELVE<br>LSTALE<br>HQEYISF<br>LEDLK | 3,425.66 |

|         |      |                                                                                                                                                                                           |                                                                  |           |        |   |   |       |        |                                                        |                            |          |          |
|---------|------|-------------------------------------------------------------------------------------------------------------------------------------------------------------------------------------------|------------------------------------------------------------------|-----------|--------|---|---|-------|--------|--------------------------------------------------------|----------------------------|----------|----------|
| Control | 6011 | RecName gi 1153117 :<br>84,gi 74354<br>Full=Co 078,gi 7773<br>mplement 6001<br>compone<br>nt 1 Q<br>subcomp<br>onent-<br>binding<br>protein,<br>mitochon<br>drial;<br>Flags:<br>Precursor | 30,588.80                                                        | 100.00%   | 3      | 5 | 6 | 0.05% | 19.40% | GVDNTF<br>ADELVE<br>LSTALE<br>HQEYISF<br>LEDLKG<br>FVK | 5.9                        | 3,856.92 |          |
| Control | 6011 | Na/K-<br>ATPase<br>beta 1<br>subunit<br>[synthetic<br>construct<br>]                                                                                                                      | gi 2209487<br>6<br>35,156.20                                     | 100.00%   | 3      | 4 | 7 | 0.05% | 9.21%  | AYGENI<br>GYSEKD<br>R                                  | 3.47                       | 1,501.69 |          |
| Control | 6011 | Na/K-<br>ATPase<br>beta 1<br>subunit<br>[synthetic<br>construct<br>]                                                                                                                      | gi 2209487<br>6<br>35,156.20                                     | 100.00%   | 3      | 4 | 7 | 0.05% | 9.21%  | SYMTYV<br>DNIDNFL<br>K                                 | 2.36                       | 1,738.80 |          |
| Control | 6011 | Na/K-<br>ATPase<br>beta 1<br>subunit<br>[synthetic<br>construct<br>]                                                                                                                      | gi 2209487<br>6<br>35,156.20                                     | 100.00%   | 3      | 4 | 7 | 0.05% | 9.21%  | SYMTYV<br>DNIDNFL<br>KK                                | 2.73                       | 1,866.89 |          |
| Control | 6011 | plastin 3<br>16                                                                                                                                                                           | gi 1529411<br>16<br>70,782.90                                    | 100.00%   | 3      | 3 | 3 | 0.02% | 6.51%  | AYFHLL<br>NQIAPK                                       | 3.98                       | 1,414.78 |          |
| Control | 6011 | plastin 3<br>16                                                                                                                                                                           | gi 1529411<br>16<br>70,782.90                                    | 100.00%   | 3      | 3 | 3 | 0.02% | 6.51%  | IDINMSG<br>FNETDD<br>LKR                               | 3.46                       | 1,883.88 |          |
| Control | 6011 | plastin 3<br>16                                                                                                                                                                           | gi 1529411<br>16<br>70,782.90                                    | 100.00%   | 3      | 3 | 3 | 0.02% | 6.51%  | MINLSVP<br>DTIDER                                      | 3.33                       | 1,518.75 |          |
| Control | 6011 | PREDIC<br>TED:<br>similar to<br>ATPase,<br>Cu++<br>transporti<br>ng, alpha<br>polypepti<br>de                                                                                             | gi 1199202<br>63<br>163,335.40                                   | 99.80%    | 2      | 2 | 2 | 0.02% | 2.53%  | GTVEYD<br>PLLTSP<br>TLR                                | 3.56                       | 1,790.92 |          |
| Control | 6011 | PREDIC<br>TED:<br>similar to<br>ATPase,<br>Cu++<br>transporti<br>ng, alpha<br>polypepti<br>de                                                                                             | gi 1199202<br>63<br>163,335.40                                   | 99.80%    | 2      | 2 | 2 | 0.02% | 2.53%  | ILAIVGT<br>AESNSE<br>HPLGAAI<br>TK                     | 4.13                       | 2,192.19 |          |
| Control | 6011 | ARF1<br>protein                                                                                                                                                                           | gi 1463273<br>84,gi 28603<br>778,gi 5985<br>8233,gi 627<br>51462 | 20,583.70 | 99.80% | 2 | 2 | 2     | 0.02%  | 22.10%                                                 | MLAEDE<br>LRDAVL<br>LVFANK | 4.67     | 2,063.08 |



|         |      |                                                                                                             |                                                                     |           |         |   |    |    |       |        |                                                     |          |
|---------|------|-------------------------------------------------------------------------------------------------------------|---------------------------------------------------------------------|-----------|---------|---|----|----|-------|--------|-----------------------------------------------------|----------|
| Control | 6011 | ARF1<br>protein                                                                                             | gi 1463273<br>84,gi 28603<br>778,gi 5985<br>8233,gi 627<br>51462    | 20,583.70 | 99.80%  | 2 | 2  | 2  | 0.02% | 22.10% | QDLPNA 2.91<br>MNAAEI<br>TDKLGL<br>HSLR             | 2,423.24 |
| Control | 6011 | H2A<br>histone<br>family,<br>member<br>X                                                                    | gi 1096593<br>79,gi 11933<br>1192,gi 119<br>889440                  | 13,977.80 | 99.80%  | 2 | 3  | 3  | 0.02% | 23.10% | LLGGVTI 4.52<br>AQGGVL<br>PNIQAVL<br>LPK            | 2,271.38 |
| Control | 6011 | H2A<br>histone<br>family,<br>member<br>X                                                                    | gi 1096593<br>79,gi 11933<br>1192,gi 119<br>889440                  | 13,977.80 | 99.80%  | 2 | 3  | 3  | 0.02% | 23.10% | NDEELN 2.99<br>KLLGGV<br>TIAQGG<br>VLPNIQA<br>VLLPK | 3,113.76 |
| Control | 6011 | RecName<br>:<br>Full=Ann<br>exin A3;<br>AltName:<br>Full=Ann<br>exin-3;<br>AltName:<br>Full=Ann<br>exin III | gi 1152998<br>47,gi 74356<br>332,gi 7836<br>9184                    | 36,125.00 | 99.80%  | 2 | 2  | 2  | 0.02% | 5.57%  | SEIDLLD 3.04<br>IR                                  | 1,073.58 |
| Control | 6011 | RecName<br>:<br>Full=Ann<br>exin A3;<br>AltName:<br>Full=Ann<br>exin-3;<br>AltName:<br>Full=Ann<br>exin III | gi 1152998<br>47,gi 74356<br>332,gi 7836<br>9184                    | 36,125.00 | 99.80%  | 2 | 2  | 2  | 0.02% | 5.57%  | TLISILTE 2.58<br>R                                  | 1,045.63 |
| Control | 6011 | Catenin<br>(cadherin-<br>associate<br>d<br>protein),<br>beta 1,<br>88kDa                                    | gi 1113046<br>24,gi 11549<br>7488,gi 122<br>145603,gi 1<br>52941124 | 85,493.00 | 100.00% | 8 | 10 | 15 | 0.12% | 17.30% | GLNTIPL 4.94<br>FVQLLY<br>SPIENIQ<br>R              | 2,428.36 |
| Control | 6011 | Catenin<br>(cadherin-<br>associate<br>d<br>protein),<br>beta 1,<br>88kDa                                    | gi 1113046<br>24,gi 11549<br>7488,gi 122<br>145603,gi 1<br>52941124 | 85,493.00 | 100.00% | 8 | 10 | 15 | 0.12% | 17.30% | HAVVNL 4.26<br>INYQDD<br>AELATR                     | 2,042.03 |
| Control | 6011 | Catenin<br>(cadherin-<br>associate<br>d<br>protein),<br>beta 1,<br>88kDa                                    | gi 1113046<br>24,gi 11549<br>7488,gi 122<br>145603,gi 1<br>52941124 | 85,493.00 | 100.00% | 8 | 10 | 15 | 0.12% | 17.30% | LHYGLP 3.22<br>VVVK                                 | 1,124.68 |
| Control | 6011 | Catenin<br>(cadherin-<br>associate<br>d<br>protein),<br>beta 1,<br>88kDa                                    | gi 1113046<br>24,gi 11549<br>7488,gi 122<br>145603,gi 1<br>52941124 | 85,493.00 | 100.00% | 8 | 10 | 15 | 0.12% | 17.30% | LILASG 3.75<br>GPQALV<br>NIMR                       | 1,782.03 |

|         |      |                                                                    |            |            |         |   |    |    |       |        |                                  |      |          |
|---------|------|--------------------------------------------------------------------|------------|------------|---------|---|----|----|-------|--------|----------------------------------|------|----------|
| Control | 6011 | Catenin (cadherin-24,gi 11549 associate d protein), beta 1, 88kDa  | gi 1113046 | 85,493.00  | 100.00% | 8 | 10 | 15 | 0.12% | 17.30% | LLNDED QVVVVK                    | 3.84 | 1,385.73 |
| Control | 6011 | Catenin (cadherin-24,gi 11549 associate d protein), beta 1, 88kDa  | gi 1113046 | 85,493.00  | 100.00% | 8 | 10 | 15 | 0.12% | 17.30% | MLGSPV DSVLFY AITTLHN LLLHQE GAK | 3.43 | 3,083.62 |
| Control | 6011 | Catenin (cadherin-24,gi 11549 associate d protein), beta 1, 88kDa  | gi 1113046 | 85,493.00  | 100.00% | 8 | 10 | 15 | 0.12% | 17.30% | NEGVAT YAAAVL FR                 | 4.12 | 1,481.77 |
| Control | 6011 | Catenin (cadherin-24,gi 11549 associate d protein), beta 1, 88kDa  | gi 1113046 | 85,493.00  | 100.00% | 8 | 10 | 15 | 0.12% | 17.30% | TSMGGT QQQFVE GVR                | 3.89 | 1,640.77 |
| Control | 6011 | CDP-diacylglycerol synthase (phosphatidate cytidylyltransferase) 2 | gi 1173065 | 51,340.60  | 100.00% | 4 | 4  | 6  | 0.05% | 15.30% | EPEAPPE DKESES EAKADG ETASDS ESR | 2.1  | 2,977.27 |
| Control | 6011 | CDP-diacylglycerol synthase (phosphatidate cytidylyltransferase) 2 | gi 1173065 | 51,340.60  | 100.00% | 4 | 4  | 6  | 0.05% | 15.30% | LVQQFL TLRPDQ QLHIFNT LK         | 3.59 | 2,552.44 |
| Control | 6011 | CDP-diacylglycerol synthase (phosphatidate cytidylyltransferase) 2 | gi 1173065 | 51,340.60  | 100.00% | 4 | 4  | 6  | 0.05% | 15.30% | SHLTDK GMLTAA TEDK               | 3.3  | 1,733.84 |
| Control | 6011 | CDP-diacylglycerol synthase (phosphatidate cytidylyltransferase) 2 | gi 1173065 | 51,340.60  | 100.00% | 4 | 4  | 6  | 0.05% | 15.30% | VAREPE APPEDK ESESEAK            | 3.31 | 2,097.99 |
| Control | 6011 | PREDICTED: collagen, type XII, alpha 1 isoform 1                   | gi 1946697 | 351,243.80 | 100.00% | 7 | 7  | 7  | 0.05% | 3.47%  | FNQMLN QIPNDY HSSR               | 2.96 | 1,979.90 |

|         |      |                                                              |                                     |            |         |   |   |   |       |        |                           |      |          |
|---------|------|--------------------------------------------------------------|-------------------------------------|------------|---------|---|---|---|-------|--------|---------------------------|------|----------|
| Control | 6011 | PREDIC TED: collagen, type XII, alpha 1 isoform 1            | gi 194669778                        | 351,243.80 | 100.00% | 7 | 7 | 7 | 0.05% | 3.47%  | GLTSSEP VSIMEK            | 3.41 | 1,393.69 |
| Control | 6011 | PREDIC TED: collagen, type XII, alpha 1 isoform 1            | gi 194669778                        | 351,243.80 | 100.00% | 7 | 7 | 7 | 0.05% | 3.47%  | GPGDLE APSNLV LSER        | 3.96 | 1,653.84 |
| Control | 6011 | PREDIC TED: collagen, type XII, alpha 1 isoform 1            | gi 194669778                        | 351,243.80 | 100.00% | 7 | 7 | 7 | 0.05% | 3.47%  | ITYQPST GEGNEQ TTTIGGR    | 4.58 | 2,110.01 |
| Control | 6011 | PREDIC TED: collagen, type XII, alpha 1 isoform 1            | gi 194669778                        | 351,243.80 | 100.00% | 7 | 7 | 7 | 0.05% | 3.47%  | IVEVFEI GPK               | 2.79 | 1,130.65 |
| Control | 6011 | PREDIC TED: collagen, type XII, alpha 1 isoform 1            | gi 194669778                        | 351,243.80 | 100.00% | 7 | 7 | 7 | 0.05% | 3.47%  | LKPDTP YTITVSS LYPDGE GGR | 3.68 | 2,366.19 |
| Control | 6011 | PREDIC TED: collagen, type XII, alpha 1 isoform 1            | gi 194669778                        | 351,243.80 | 100.00% | 7 | 7 | 7 | 0.05% | 3.47%  | NNVILQP LQPDTP YK         | 4.34 | 1,739.93 |
| Control | 6011 | V-ral simian leukemia viral oncogene homolog A (ras related) | gi 73586513,gi 77736231,gi 95768203 | 23,522.20  | 100.00% | 4 | 4 | 5 | 0.04% | 20.40% | ANVDKV FFDLMR             | 3.98 | 1,470.74 |
| Control | 6011 | V-ral simian leukemia viral oncogene homolog A (ras related) | gi 73586513,gi 77736231,gi 95768203 | 23,522.20  | 100.00% | 4 | 4 | 5 | 0.04% | 20.40% | SDLEDK RQVSVE EAK         | 3.13 | 1,732.87 |
| Control | 6011 | V-ral simian leukemia viral oncogene homolog A (ras related) | gi 73586513,gi 77736231,gi 95768203 | 23,522.20  | 100.00% | 4 | 4 | 5 | 0.04% | 20.40% | VFFDLM R                  | 2.39 | 943.4707 |

|         |      |                                                                                                                    |                                                  |           |         |   |   |   |       |        |                                            |      |          |
|---------|------|--------------------------------------------------------------------------------------------------------------------|--------------------------------------------------|-----------|---------|---|---|---|-------|--------|--------------------------------------------|------|----------|
| Control | 6011 | V-ral<br>simian<br>leukemia<br>viral<br>oncogene<br>homolog<br>A (ras<br>related)                                  | gi 7358651<br>3,gi 777362<br>31,gi 95768<br>203  | 23,522.20 | 100.00% | 4 | 4 | 5 | 0.04% | 20.40% | VKEDEN<br>VPFLLV<br>GNK                    | 4.53 | 1,700.92 |
| Control | 6011 | ALDOA<br>protein                                                                                                   | gi 1515547<br>49,gi 15612<br>0479                | 39,418.80 | 99.80%  | 2 | 2 | 3 | 0.02% | 7.97%  | GILAADE<br>STGSIK                          | 4.33 | 1,332.70 |
| Control | 6011 | ALDOA<br>protein                                                                                                   | gi 1515547<br>49,gi 15612<br>0479                | 39,418.80 | 99.80%  | 2 | 2 | 3 | 0.02% | 7.97%  | RLQSIGT<br>ENTEEN<br>RR                    | 3.39 | 1,802.91 |
| Control | 6011 | PREDIC<br>TED:<br>similar to<br>small<br>GTP<br>binding<br>protein<br>RAB23                                        | gi 1946775<br>45                                 | 37,951.40 | 99.80%  | 2 | 2 | 2 | 0.02% | 9.91%  | LKQQIAE<br>NPESMH<br>SSSNK                 | 2.98 | 2,043.98 |
| Control | 6011 | PREDIC<br>TED:<br>similar to<br>small<br>GTP<br>binding<br>protein<br>RAB23                                        | gi 1946775<br>45                                 | 37,951.40 | 99.80%  | 2 | 2 | 2 | 0.02% | 9.91%  | VVAEVG<br>DIPTALV<br>QNK                   | 4.55 | 1,652.92 |
| Control | 6011 | signal<br>transduce<br>r and<br>activator<br>of<br>transcript<br>ion 3<br>(acute-<br>phase<br>response<br>factor)  | gi 1622873<br>61,gi 81674<br>209                 | 83,096.10 | 99.80%  | 2 | 2 | 2 | 0.02% | 5.54%  | AILSTKP<br>PGTFLLR                         | 2.43 | 1,513.91 |
| Control | 6011 | signal<br>transduce<br>r and<br>activator<br>of<br>transcript<br>ion 3<br>(acute-<br>phase<br>response<br>factor)  | gi 1622873<br>61,gi 81674<br>209                 | 83,096.10 | 99.80%  | 2 | 2 | 2 | 0.02% | 5.54%  | LLQTAA<br>TAAQQG<br>GQANHP<br>TAAVVT<br>EK | 4.12 | 2,576.34 |
| Control | 6011 | RecName<br>:<br>Full=Tra<br>nsmembr<br>ane<br>emp24<br>domain-<br>containin<br>g protein<br>1; Flags:<br>Precursor | gi 1141522<br>89,gi 83638<br>714,gi 8437<br>0158 | 25,119.90 | 99.80%  | 2 | 2 | 3 | 0.02% | 11.50% | KADGVH<br>TVEPTE<br>AGDYK                  | 4.29 | 1,816.87 |

|         |      |                                                                            |                                                 |           |        |   |   |   |       |        |                        |      |          |
|---------|------|----------------------------------------------------------------------------|-------------------------------------------------|-----------|--------|---|---|---|-------|--------|------------------------|------|----------|
| Control | 6011 | RecName : Full=Transmembrane domain-containing protein 1; Flags: Precursor | gi 114152289,gi 83638714,gi 84370158            | 25,119.90 | 99.80% | 2 | 2 | 3 | 0.02% | 11.50% | SIQVLTL LR             | 2.92 | 1,042.66 |
| Control | 6011 | growth and transformation-dependent protein                                | gi 114051522,gi 126258169,gi 84201630           | 17,719.20 | 99.80% | 2 | 2 | 2 | 0.02% | 20.50% | FKKEDEI PETVSFE MLDAAK | 3.47 | 2,343.14 |
| Control | 6011 | growth and transformation-dependent protein                                | gi 114051522,gi 126258169,gi 84201630           | 17,719.20 | 99.80% | 2 | 2 | 2 | 0.02% | 20.50% | RNETLT SLNLEK          | 3.77 | 1,417.76 |
| Control | 6011 | PREDICTED: similar to asparagine-linked glycosylation 9 protein            | gi 194673194                                    | 61,870.50 | 99.80% | 2 | 3 | 3 | 0.02% | 6.53%  | LKGSGG SGGDTA SAADKL R | 3.15 | 1,747.89 |
| Control | 6011 | PREDICTED: similar to asparagine-linked glycosylation 9 protein            | gi 194673194                                    | 61,870.50 | 99.80% | 2 | 3 | 3 | 0.02% | 6.53%  | TVPTDM NDQNLE EPSR     | 1.8  | 1,861.82 |
| Control | 6011 | NADH:ubiquinone oxidoreductase ASHI subunit [Homo sapiens]                 | gi 33150722                                     | 21,747.60 | 99.80% | 2 | 2 | 3 | 0.02% | 16.10% | QYPYNN LYLER           | 2.34 | 1,472.72 |
| Control | 6011 | NADH:ubiquinone oxidoreductase ASHI subunit [Homo sapiens]                 | gi 33150722                                     | 21,747.60 | 99.80% | 2 | 2 | 3 | 0.02% | 16.10% | VEDYEP YPDDGM GYGDYP K | 3.23 | 2,225.89 |
| Control | 6011 | proteasome activator subunit 2                                             | gi 59858279,gi 62460470,gi 73921837,gi 74267960 | 27,362.30 | 99.80% | 2 | 3 | 4 | 0.03% | 10.50% | QNLFQE AEEFLY R        | 4.02 | 1,686.81 |
| Control | 6011 | proteasome activator subunit 2                                             | gi 59858279,gi 62460470,gi 73921837,gi 74267960 | 27,362.30 | 99.80% | 2 | 3 | 4 | 0.03% | 10.50% | TKVEAF QTTISK          | 3.23 | 1,352.74 |

|         |      |                                                       |                                                                                              |           |         |   |   |   |       |        |                                          |          |
|---------|------|-------------------------------------------------------|----------------------------------------------------------------------------------------------|-----------|---------|---|---|---|-------|--------|------------------------------------------|----------|
| Control | 6011 | Membrane bound O-acyltransferase domain containin g 7 | gi 111308475,gi 115496722,gi 122143520                                                       | 52,749.30 | 99.80%  | 2 | 2 | 2 | 0.02% | 8.47%  | ALSLGL 2.59<br>PTPTPFT<br>NAVQLL<br>LTLK | 2,521.50 |
| Control | 6011 | Membrane bound O-acyltransferase domain containin g 7 | gi 111308475,gi 115496722,gi 122143520                                                       | 52,749.30 | 99.80%  | 2 | 2 | 2 | 0.02% | 8.47%  | LVSLASE 3.26<br>VQDLHV<br>AQR            | 1,764.96 |
| Control | 6011 | unnamed protein product                               | gi 110292444,gi 1351907,gi 148744077,gi 162648,gi 2190337,gi 23307791,gi 30794280,gi 3336842 | 69,296.20 | 100.00% | 5 | 5 | 8 | 0.06% | 10.00% | DAFLGS 3.73<br>FLYEYS<br>R               | 1,567.74 |
| Control | 6011 | unnamed protein product                               | gi 110292444,gi 1351907,gi 148744077,gi 162648,gi 2190337,gi 23307791,gi 30794280,gi 3336842 | 69,296.20 | 100.00% | 5 | 5 | 8 | 0.06% | 10.00% | HLVDEP 2.91<br>QNLK                      | 1,305.72 |
| Control | 6011 | unnamed protein product                               | gi 110292444,gi 1351907,gi 148744077,gi 162648,gi 2190337,gi 23307791,gi 30794280,gi 3336842 | 69,296.20 | 100.00% | 5 | 5 | 8 | 0.06% | 10.00% | KVPQVS 4.42<br>TPTLVE<br>VSR             | 1,639.94 |
| Control | 6011 | unnamed protein product                               | gi 110292444,gi 1351907,gi 148744077,gi 162648,gi 2190337,gi 23307791,gi 30794280,gi 3336842 | 69,296.20 | 100.00% | 5 | 5 | 8 | 0.06% | 10.00% | LVNELT 2.99<br>EFAK                      | 1,163.63 |
| Control | 6011 | unnamed protein product                               | gi 110292444,gi 1351907,gi 148744077,gi 162648,gi 2190337,gi 23307791,gi 30794280,gi 3336842 | 69,296.20 | 100.00% | 5 | 5 | 8 | 0.06% | 10.00% | TVMENF 3.32<br>VAFVDK                    | 1,415.69 |

|         |      |                                                      |                                     |           |         |    |    |    |       |        |                                                            |          |
|---------|------|------------------------------------------------------|-------------------------------------|-----------|---------|----|----|----|-------|--------|------------------------------------------------------------|----------|
| Control | 6011 | polymerase I and transcript release factor isoform 2 | gi 162287374                        | 43,446.30 | 100.00% | 10 | 13 | 21 | 0.16% | 26.90% | IIGAVDQ 6.2<br>IQLTQA<br>QLEER                             | 2,025.10 |
| Control | 6011 | polymerase I and transcript release factor isoform 2 | gi 162287374                        | 43,446.30 | 100.00% | 10 | 13 | 21 | 0.16% | 26.90% | IREGQVE 3.49<br>VLK                                        | 1,170.68 |
| Control | 6011 | polymerase I and transcript release factor isoform 2 | gi 162287374                        | 43,446.30 | 100.00% | 10 | 13 | 21 | 0.16% | 26.90% | KLEVNE 4.23<br>AELLR                                       | 1,313.74 |
| Control | 6011 | polymerase I and transcript release factor isoform 2 | gi 162287374                        | 43,446.30 | 100.00% | 10 | 13 | 21 | 0.16% | 26.90% | KSFTPD 3<br>HVYYAR                                         | 1,419.74 |
| Control | 6011 | polymerase I and transcript release factor isoform 2 | gi 162287374                        | 43,446.30 | 100.00% | 10 | 13 | 21 | 0.16% | 26.90% | LEVNEA 3.17<br>ELLR                                        | 1,185.65 |
| Control | 6011 | polymerase I and transcript release factor isoform 2 | gi 162287374                        | 43,446.30 | 100.00% | 10 | 13 | 21 | 0.16% | 26.90% | QAEMEG 3.87<br>AVQSIQ<br>GELSK                             | 1,820.87 |
| Control | 6011 | polymerase I and transcript release factor isoform 2 | gi 162287374                        | 43,446.30 | 100.00% | 10 | 13 | 21 | 0.16% | 26.90% | SDQVNG 3.75<br>VLVLSLL<br>DK                               | 1,599.90 |
| Control | 6011 | polymerase I and transcript release factor isoform 2 | gi 162287374                        | 43,446.30 | 100.00% | 10 | 13 | 21 | 0.16% | 26.90% | SDQVNG 3.75<br>VLVLSLL<br>DKIIGAV<br>DQIQLT<br>QAQLEE<br>R | 3,605.98 |
| Control | 6011 | polymerase I and transcript release factor isoform 2 | gi 162287374                        | 43,446.30 | 100.00% | 10 | 13 | 21 | 0.16% | 26.90% | VMIYQD 4.24<br>EVKLPA<br>K                                 | 1,549.83 |
| Control | 6011 | polymerase I and transcript release factor isoform 2 | gi 162287374                        | 43,446.30 | 100.00% | 10 | 13 | 21 | 0.16% | 26.90% | VPPFTFH 1.89<br>VK                                         | 1,071.60 |
| Control | 6011 | B-cell receptor-associated protein 31                | gi 59858303,gi 62460574,gi 74354925 | 27,884.40 | 100.00% | 4  | 7  | 14 | 0.11% | 21.60% | KYMEEN 4.51<br>DLLKK                                       | 1,426.72 |
| Control | 6011 | B-cell receptor-associated protein 31                | gi 59858303,gi 62460574,gi 74354925 | 27,884.40 | 100.00% | 4  | 7  | 14 | 0.11% | 21.60% | LEKAEN 4.09<br>EALAMR                                      | 1,390.70 |

|         |      |                                                     |                                                   |           |         |    |    |    |       |        |                                      |          |
|---------|------|-----------------------------------------------------|---------------------------------------------------|-----------|---------|----|----|----|-------|--------|--------------------------------------|----------|
| Control | 6011 | B-cell<br>receptor-<br>associate<br>d protein<br>31 | gi 5985830<br>3,gi 624605<br>74,gi 74354<br>925   | 27,884.40 | 100.00% | 4  | 7  | 14 | 0.11% | 21.60% | LQAAVD 2.4<br>GPSDKK<br>EE           | 1,486.74 |
| Control | 6011 | B-cell<br>receptor-<br>associate<br>d protein<br>31 | gi 5985830<br>3,gi 624605<br>74,gi 74354<br>925   | 27,884.40 | 100.00% | 4  | 7  | 14 | 0.11% | 21.60% | VNLQNN 3.66<br>PGAVEH<br>FHMK        | 1,850.90 |
| Control | 6011 | ITGA3<br>protein                                    | gi 1515562<br>79,gi 15612<br>0449                 | 45,035.90 | 99.80%  | 2  | 2  | 3  | 0.02% | 6.34%  | EAGNPG 3.69<br>SLFGYS<br>VALHR       | 1,774.89 |
| Control | 6011 | ITGA3<br>protein                                    | gi 1515562<br>79,gi 15612<br>0449                 | 45,035.90 | 99.80%  | 2  | 2  | 3  | 0.02% | 6.34%  | YLLLAG 3.4<br>APR                    | 973.583  |
| Control | 6011 | RecName<br>:<br>Full=Pro<br>hibitin-2               | gi 1098928<br>20,gi 11405<br>1223,gi 875<br>78149 | 33,340.80 | 100.00% | 14 | 16 | 44 | 0.34% | 56.90% | AKDFSLI 3.51<br>LDDVAI<br>TELSFSR    | 2,240.18 |
| Control | 6011 | RecName<br>:<br>Full=Pro<br>hibitin-2               | gi 1098928<br>20,gi 11405<br>1223,gi 875<br>78149 | 33,340.80 | 100.00% | 14 | 16 | 44 | 0.34% | 56.90% | AQVSLLI 2.26<br>R                    | 899.5673 |
| Control | 6011 | RecName<br>:<br>Full=Pro<br>hibitin-2               | gi 1098928<br>20,gi 11405<br>1223,gi 875<br>78149 | 33,340.80 | 100.00% | 14 | 16 | 44 | 0.34% | 56.90% | DLQMVN 3.35<br>ISLR                  | 1,204.64 |
| Control | 6011 | RecName<br>:<br>Full=Pro<br>hibitin-2               | gi 1098928<br>20,gi 11405<br>1223,gi 875<br>78149 | 33,340.80 | 100.00% | 14 | 16 | 44 | 0.34% | 56.90% | ESVFTV 1.93<br>EGGHR                 | 1,217.59 |
| Control | 6011 | RecName<br>:<br>Full=Pro<br>hibitin-2               | gi 1098928<br>20,gi 11405<br>1223,gi 875<br>78149 | 33,340.80 | 100.00% | 14 | 16 | 44 | 0.34% | 56.90% | FNASQLI 3.96<br>TQR                  | 1,177.63 |
| Control | 6011 | RecName<br>:<br>Full=Pro<br>hibitin-2               | gi 1098928<br>20,gi 11405<br>1223,gi 875<br>78149 | 33,340.80 | 100.00% | 14 | 16 | 44 | 0.34% | 56.90% | IGGVQQ 4.97<br>DTILAEQ<br>LHFR       | 1,853.99 |
| Control | 6011 | RecName<br>:<br>Full=Pro<br>hibitin-2               | gi 1098928<br>20,gi 11405<br>1223,gi 875<br>78149 | 33,340.80 | 100.00% | 14 | 16 | 44 | 0.34% | 56.90% | IPWFQYP 3.89<br>IYDIR                | 1,723.92 |
| Control | 6011 | RecName<br>:<br>Full=Pro<br>hibitin-2               | gi 1098928<br>20,gi 11405<br>1223,gi 875<br>78149 | 33,340.80 | 100.00% | 14 | 16 | 44 | 0.34% | 56.90% | IVQAEG 3.93<br>EAEAAR                | 1,243.63 |
| Control | 6011 | RecName<br>:<br>Full=Pro<br>hibitin-2               | gi 1098928<br>20,gi 11405<br>1223,gi 875<br>78149 | 33,340.80 | 100.00% | 14 | 16 | 44 | 0.34% | 56.90% | IYLTAD 5.61<br>NLVLNL<br>QDESFT<br>R | 2,225.15 |
| Control | 6011 | RecName<br>:<br>Full=Pro<br>hibitin-2               | gi 1098928<br>20,gi 11405<br>1223,gi 875<br>78149 | 33,340.80 | 100.00% | 14 | 16 | 44 | 0.34% | 56.90% | LGLDYE 2.92<br>ER                    | 994.4841 |
| Control | 6011 | RecName<br>:<br>Full=Pro<br>hibitin-2               | gi 1098928<br>20,gi 11405<br>1223,gi 875<br>78149 | 33,340.80 | 100.00% | 14 | 16 | 44 | 0.34% | 56.90% | LLLGAG 4.48<br>AVAYGI<br>R           | 1,273.76 |
| Control | 6011 | RecName<br>:<br>Full=Pro<br>hibitin-2               | gi 1098928<br>20,gi 11405<br>1223,gi 875<br>78149 | 33,340.80 | 100.00% | 14 | 16 | 44 | 0.34% | 56.90% | QKIVQA 3.66<br>EGEAEA<br>AR          | 1,499.78 |
| Control | 6011 | RecName<br>:<br>Full=Pro<br>hibitin-2               | gi 1098928<br>20,gi 11405<br>1223,gi 875<br>78149 | 33,340.80 | 100.00% | 14 | 16 | 44 | 0.34% | 56.90% | VLPSIVN 2.62<br>EVLK                 | 1,210.74 |



|         |      |                                               |                                                                                                                            |           |         |    |    |    |       |        |                                             |      |          |
|---------|------|-----------------------------------------------|----------------------------------------------------------------------------------------------------------------------------|-----------|---------|----|----|----|-------|--------|---------------------------------------------|------|----------|
| Control | 6011 | RecName<br>:<br>Full=Pro<br>hibitin-2         | gi 1098928<br>20,gi 11405<br>1223,gi 875<br>78149                                                                          | 33,340.80 | 100.00% | 14 | 16 | 44 | 0.34% | 56.90% | VLSRPN<br>AMELPS<br>MYQR                    | 2.79 | 1,907.95 |
| Control | 6011 | Cancer<br>susceptib<br>ility<br>candidate     | gi 1260107<br>17,gi 12616<br>5222,gi 150<br>438872                                                                         | 43,181.70 | 99.80%  | 2  | 2  | 2  | 0.02% | 7.11%  | HVLLQE<br>EVAELQ<br>GQVQR                   | 3.33 | 1,976.06 |
| Control | 6011 | Cancer<br>susceptib<br>ility<br>candidate     | gi 1260107<br>17,gi 12616<br>5222,gi 150<br>438872                                                                         | 43,181.70 | 99.80%  | 2  | 2  | 2  | 0.02% | 7.11%  | LADQFL<br>QEQQ                              | 2.82 | 1,219.63 |
| Control | 6011 | TAP1<br>protein                               | gi 1515570<br>07                                                                                                           | 81,933.30 | 100.00% | 6  | 8  | 14 | 0.11% | 10.80% | GVVGAA<br>LGFR                              | 2.95 | 946.5469 |
| Control | 6011 | TAP1<br>protein                               | gi 1515570<br>07                                                                                                           | 81,933.30 | 100.00% | 6  | 8  | 14 | 0.11% | 10.80% | IFEYLDLDR                                   | 2.45 | 955.4884 |
| Control | 6011 | TAP1<br>protein                               | gi 1515570<br>07                                                                                                           | 81,933.30 | 100.00% | 6  | 8  | 14 | 0.11% | 10.80% | SFANEE<br>GEAQKF<br>R                       | 4.26 | 1,512.71 |
| Control | 6011 | TAP1<br>protein                               | gi 1515570<br>07                                                                                                           | 81,933.30 | 100.00% | 6  | 8  | 14 | 0.11% | 10.80% | SSQVAIE<br>VLSAMP<br>TVR                    | 3.23 | 1,703.90 |
| Control | 6011 | TAP1<br>protein                               | gi 1515570<br>07                                                                                                           | 81,933.30 | 100.00% | 6  | 8  | 14 | 0.11% | 10.80% | STVAAL<br>LQNLYQ<br>PTEGQV<br>LLDGEP<br>LPK | 5.25 | 2,894.55 |
| Control | 6011 | TAP1<br>protein                               | gi 1515570<br>07                                                                                                           | 81,933.30 | 100.00% | 6  | 8  | 14 | 0.11% | 10.80% | SVLFITQ<br>R                                | 2.68 | 963.5622 |
| Control | 6011 | PREDIC<br>TED:<br>similar to<br>keratin<br>6A | gi 1946873<br>33,gi 61870<br>938,gi 7661<br>7862,gi 766<br>17868,gi 76<br>689949                                           | 60,808.20 | 99.80%  | 2  | 2  | 2  | 0.02% | 8.06%  | FASFIDK<br>VR                               | 1.87 | 1,082.60 |
| Control | 6011 | PREDIC<br>TED:<br>similar to<br>keratin<br>6A | gi 1946873<br>33,gi 61870<br>938,gi 7661<br>7862,gi 766<br>17868,gi 76<br>689949                                           | 60,808.20 | 99.80%  | 2  | 2  | 2  | 0.02% | 8.06%  | NKYEDE<br>INKR                              | 2.43 | 1,308.65 |
| Control | 6011 | PREDIC<br>TED:<br>similar to<br>keratin<br>6A | gi 1946873<br>33,gi 61870<br>938,gi 7661<br>7862,gi 766<br>17868,gi 76<br>689949                                           | 60,808.20 | 99.80%  | 2  | 2  | 2  | 0.02% | 8.06%  | NLDLDSI<br>IAEVK                            | 3.84 | 1,329.73 |
| Control | 6011 | PREDIC<br>TED:<br>similar to<br>keratin<br>6A | gi 1946873<br>33,gi 61870<br>938,gi 7661<br>7862,gi 766<br>17868,gi 76<br>689949                                           | 60,808.20 | 99.80%  | 2  | 2  | 2  | 0.02% | 8.06%  | QNLEPLF<br>EQYINN<br>LR                     | 3.08 | 1,890.97 |
| Control | 6011 | ribosomal<br>protein<br>L3                    | gi 1092507,<br>gi 1544261<br>64,gi 27807<br>287,gi 4504<br>99,gi 59858<br>389,gi 7159<br>574,gi 7305<br>64,gi 74267<br>942 | 46,006.40 | 100.00% | 3  | 3  | 3  | 0.02% | 15.90% | DDSSKP<br>VHLTAF<br>LGYK                    | 3.78 | 1,777.91 |

|         |      |                                                                                                                                                                                                                  |                                                                                                                                      |           |         |   |    |    |       |        |                                            |      |          |
|---------|------|------------------------------------------------------------------------------------------------------------------------------------------------------------------------------------------------------------------|--------------------------------------------------------------------------------------------------------------------------------------|-----------|---------|---|----|----|-------|--------|--------------------------------------------|------|----------|
| Control | 6011 | ribosomal protein L3                                                                                                                                                                                             | gi 1092507, gi 1544261, gi 64, gi 27807, gi 287, gi 4504, gi 99, gi 59858, gi 389, gi 7159, gi 574, gi 7305, gi 64, gi 74267, gi 942 | 46,006.40 | 100.00% | 3 | 3  | 3  | 0.02% | 15.90% | ERLEQQ<br>VPVSQV<br>FGQDEM<br>IDVIGVT<br>K | 5.33 | 2,960.50 |
| Control | 6011 | ribosomal protein L3                                                                                                                                                                                             | gi 1092507, gi 1544261, gi 64, gi 27807, gi 287, gi 4504, gi 99, gi 59858, gi 389, gi 7159, gi 574, gi 7305, gi 64, gi 74267, gi 942 | 46,006.40 | 100.00% | 3 | 3  | 3  | 0.02% | 15.90% | SINPLGG<br>FVHYGE<br>VTNDFV<br>MLK         | 4.03 | 2,453.22 |
| Control | 6011 | MOSPD2 protein                                                                                                                                                                                                   | gi 1515560, gi 11, gi 9632, gi 156, gi 120441                                                                                        | 56,360.50 | 100.00% | 3 | 4  | 5  | 0.04% | 6.71%  | ALIVLTN<br>VTK                             | 3.11 | 1,071.68 |
| Control | 6011 | MOSPD2 protein                                                                                                                                                                                                   | gi 1515560, gi 11, gi 9632, gi 156, gi 120441                                                                                        | 56,360.50 | 100.00% | 3 | 4  | 5  | 0.04% | 6.71%  | GPLLHIS<br>PAEELYF<br>GSTDSG<br>EK         | 2.9  | 2,347.15 |
| Control | 6011 | MOSPD2 protein                                                                                                                                                                                                   | gi 1515560, gi 11, gi 9632, gi 156, gi 120441                                                                                        | 56,360.50 | 100.00% | 3 | 4  | 5  | 0.04% | 6.71%  | GPLLHIS<br>PAEELYF<br>GSTDSG<br>EKK        | 5.41 | 2,475.24 |
| Control | 6011 | RecName : Full=Ann exin A2; AltName: Full=Ann 2 exin-2; AltName: Full=Ann exin II; AltName: Full=Lipocortin II; AltName: Full=Calpactin I heavy chain; AltName: Full=Chromobindin-8; AltName: Full=p36; AltName: | gi 113948, gi 1162779, gi 27807289, gi 59858385, gi 7358698                                                                          | 38,523.90 | 100.00% | 9 | 13 | 15 | 0.12% | 36.30% | AEDGSVI<br>DYELID<br>QDAR                  | 2.35 | 1,908.88 |

|         |      |                                                                                                                                                                                                                                                                                                                                                           |           |         |   |    |    |       |        |                                  |          |
|---------|------|-----------------------------------------------------------------------------------------------------------------------------------------------------------------------------------------------------------------------------------------------------------------------------------------------------------------------------------------------------------|-----------|---------|---|----|----|-------|--------|----------------------------------|----------|
| Control | 6011 | RecName gi 113948,g<br>: i 162779,g <br>Full=Ann 27807289,g<br>exin A2; i 59858385,<br>AltName: gi 7358698<br>Full=Ann 2<br>exin-2;<br>AltName:<br>Full=Ann<br>exin II;<br>AltName:<br>Full=Lip<br>ocortin<br>II;<br>AltName:<br>Full=Cal<br>pactin I<br>heavy<br>chain;<br>AltName:<br>Full=Chr<br>omobindi<br>n-8;<br>AltName:<br>Full=p36;<br>AltName: | 38,523.90 | 100.00% | 9 | 13 | 15 | 0.12% | 36.30% | AYTNFD 4.07<br>AERDAL<br>NIETAIK | 2,155.07 |
| Control | 6011 | RecName gi 113948,g<br>: i 162779,g <br>Full=Ann 27807289,g<br>exin A2; i 59858385,<br>AltName: gi 7358698<br>Full=Ann 2<br>exin-2;<br>AltName:<br>Full=Ann<br>exin II;<br>AltName:<br>Full=Lip<br>ocortin<br>II;<br>AltName:<br>Full=Cal<br>pactin I<br>heavy<br>chain;<br>AltName:<br>Full=Chr<br>omobindi<br>n-8;<br>AltName:<br>Full=p36;<br>AltName: | 38,523.90 | 100.00% | 9 | 13 | 15 | 0.12% | 36.30% | GVDEVT 4.54<br>IVNLTN<br>R       | 1,542.85 |

|         |      |                                                                                                                                                                                                                                                                                                                                                           |           |         |   |    |    |       |        |                                 |          |
|---------|------|-----------------------------------------------------------------------------------------------------------------------------------------------------------------------------------------------------------------------------------------------------------------------------------------------------------------------------------------------------------|-----------|---------|---|----|----|-------|--------|---------------------------------|----------|
| Control | 6011 | RecName gi 113948,g<br>: i 162779,g <br>Full=Ann 27807289,g<br>exin A2; i 59858385,<br>AltName: gi 7358698<br>Full=Ann 2<br>exin-2;<br>AltName:<br>Full=Ann<br>exin II;<br>AltName:<br>Full=Lip<br>ocortin<br>II;<br>AltName:<br>Full=Cal<br>pactin I<br>heavy<br>chain;<br>AltName:<br>Full=Chr<br>omobindi<br>n-8;<br>AltName:<br>Full=p36;<br>AltName: | 38,523.90 | 100.00% | 9 | 13 | 15 | 0.12% | 36.30% | LSLEGD 5.07<br>HSTPPSA<br>YGSVK | 1,844.90 |
| Control | 6011 | RecName gi 113948,g<br>: i 162779,g <br>Full=Ann 27807289,g<br>exin A2; i 59858385,<br>AltName: gi 7358698<br>Full=Ann 2<br>exin-2;<br>AltName:<br>Full=Ann<br>exin II;<br>AltName:<br>Full=Lip<br>ocortin<br>II;<br>AltName:<br>Full=Cal<br>pactin I<br>heavy<br>chain;<br>AltName:<br>Full=Chr<br>omobindi<br>n-8;<br>AltName:<br>Full=p36;<br>AltName: | 38,523.90 | 100.00% | 9 | 13 | 15 | 0.12% | 36.30% | RAEDGS 5.6<br>VIDYELI<br>DQDAR  | 2,064.98 |

|         |      |                                                                                                                                                                                                                                                                                                                                                           |           |         |   |    |    |       |        |                                                 |          |
|---------|------|-----------------------------------------------------------------------------------------------------------------------------------------------------------------------------------------------------------------------------------------------------------------------------------------------------------------------------------------------------------|-----------|---------|---|----|----|-------|--------|-------------------------------------------------|----------|
| Control | 6011 | RecName gi 113948,g<br>: i 162779,g <br>Full=Ann 27807289,g<br>exin A2; i 59858385,<br>AltName: gi 7358698<br>Full=Ann 2<br>exin-2;<br>AltName:<br>Full=Ann<br>exin II;<br>AltName:<br>Full=Lip<br>ocortin<br>II;<br>AltName:<br>Full=Cal<br>pactin I<br>heavy<br>chain;<br>AltName:<br>Full=Chr<br>omobindi<br>n-8;<br>AltName:<br>Full=p36;<br>AltName: | 38,523.90 | 100.00% | 9 | 13 | 15 | 0.12% | 36.30% | RAEDGS 2.35<br>VIDYELI<br>DQDARD<br>LYDAGV<br>K | 2,926.41 |
| Control | 6011 | RecName gi 113948,g<br>: i 162779,g <br>Full=Ann 27807289,g<br>exin A2; i 59858385,<br>AltName: gi 7358698<br>Full=Ann 2<br>exin-2;<br>AltName:<br>Full=Ann<br>exin II;<br>AltName:<br>Full=Lip<br>ocortin<br>II;<br>AltName:<br>Full=Cal<br>pactin I<br>heavy<br>chain;<br>AltName:<br>Full=Chr<br>omobindi<br>n-8;<br>AltName:<br>Full=p36;<br>AltName: | 38,523.90 | 100.00% | 9 | 13 | 15 | 0.12% | 36.30% | SALSGH 4.17<br>LETVILG<br>LLK                   | 1,650.98 |

|         |      |                                                                                                                                                                                                                                                                                                                                                           |           |         |   |    |    |       |        |                                |          |
|---------|------|-----------------------------------------------------------------------------------------------------------------------------------------------------------------------------------------------------------------------------------------------------------------------------------------------------------------------------------------------------------|-----------|---------|---|----|----|-------|--------|--------------------------------|----------|
| Control | 6011 | RecName gi 113948,g<br>: i 162779,g <br>Full=Ann 27807289,g<br>exin A2; i 59858385,<br>AltName: gi 7358698<br>Full=Ann 2<br>exin-2;<br>AltName:<br>Full=Ann<br>exin II;<br>AltName:<br>Full=Lip<br>ocortin<br>II;<br>AltName:<br>Full=Cal<br>pactin I<br>heavy<br>chain;<br>AltName:<br>Full=Chr<br>omobindi<br>n-8;<br>AltName:<br>Full=p36;<br>AltName: | 38,523.90 | 100.00% | 9 | 13 | 15 | 0.12% | 36.30% | SYSPYD 2.61<br>MLESIK<br>K     | 1,576.76 |
| Control | 6011 | RecName gi 113948,g<br>: i 162779,g <br>Full=Ann 27807289,g<br>exin A2; i 59858385,<br>AltName: gi 7358698<br>Full=Ann 2<br>exin-2;<br>AltName:<br>Full=Ann<br>exin II;<br>AltName:<br>Full=Lip<br>ocortin<br>II;<br>AltName:<br>Full=Cal<br>pactin I<br>heavy<br>chain;<br>AltName:<br>Full=Chr<br>omobindi<br>n-8;<br>AltName:<br>Full=p36;<br>AltName: | 38,523.90 | 100.00% | 9 | 13 | 15 | 0.12% | 36.30% | TDLEKDI 3.69<br>VSDTSG<br>DFRK | 1,925.95 |
| Control | 6011 | RecName gi 1102830<br>: 11.gi 27806<br>Full=Try 353.gi 7435<br>ptophanyl-4933,g 825<br>tRNA<br>synthetas<br>e,<br>cytoplas<br>mic;<br>AltName:<br>Full=Try<br>ptophan--<br>tRNA<br>ligase;<br>Short=Tr<br>pRS                                                                                                                                             | 53,712.80 | 100.00% | 5 | 8  | 10 | 0.08% | 16.00% | ELIEVLQ 3.12<br>PLIAEHQ<br>AR  | 1,859.04 |

|         |      |                                                                                                                                                                                                                  |           |         |   |   |    |       |        |                               |      |          |
|---------|------|------------------------------------------------------------------------------------------------------------------------------------------------------------------------------------------------------------------|-----------|---------|---|---|----|-------|--------|-------------------------------|------|----------|
| Control | 6011 | RecName gi 1102830 :<br>: 11.gi 27806<br>Full=Try 353.gi 7435<br>ptophanyl:4933.gi 825<br>tRNA<br>synthetas<br>e,<br>cytoplas<br>mic;<br>AltName:<br>Full=Try<br>ptophan--<br>tRNA<br>ligase;<br>Short=Tr<br>pRS | 53,712.80 | 100.00% | 5 | 8 | 10 | 0.08% | 16.00% | GIDYDK<br>LIVR                | 1.83 | 1,191.67 |
| Control | 6011 | RecName gi 1102830 :<br>: 11.gi 27806<br>Full=Try 353.gi 7435<br>ptophanyl:4933.gi 825<br>tRNA<br>synthetas<br>e,<br>cytoplas<br>mic;<br>AltName:<br>Full=Try<br>ptophan--<br>tRNA<br>ligase;<br>Short=Tr<br>pRS | 53,712.80 | 100.00% | 5 | 8 | 10 | 0.08% | 16.00% | ISFPAIQ<br>AAPSFNS<br>SFPQIFR | 4.32 | 2,325.20 |
| Control | 6011 | RecName gi 1102830 :<br>: 11.gi 27806<br>Full=Try 353.gi 7435<br>ptophanyl:4933.gi 825<br>tRNA<br>synthetas<br>e,<br>cytoplas<br>mic;<br>AltName:<br>Full=Try<br>ptophan--<br>tRNA<br>ligase;<br>Short=Tr<br>pRS | 53,712.80 | 100.00% | 5 | 8 | 10 | 0.08% | 16.00% | MSASDP<br>NSSIFLT<br>DTAK     | 4.23 | 1,800.83 |
| Control | 6011 | RecName gi 1102830 :<br>: 11.gi 27806<br>Full=Try 353.gi 7435<br>ptophanyl:4933.gi 825<br>tRNA<br>synthetas<br>e,<br>cytoplas<br>mic;<br>AltName:<br>Full=Try<br>ptophan--<br>tRNA<br>ligase;<br>Short=Tr<br>pRS | 53,712.80 | 100.00% | 5 | 8 | 10 | 0.08% | 16.00% | NAAKDE<br>IDSAVK              | 2.9  | 1,260.64 |

|         |      |                                                             |                                        |            |         |   |   |   |       |        |                                   |      |          |
|---------|------|-------------------------------------------------------------|----------------------------------------|------------|---------|---|---|---|-------|--------|-----------------------------------|------|----------|
| Control | 6011 | PREDICTED:<br>similar to<br>Transmembrane<br>protein<br>16F | gi 119892265                           | 106,290.10 | 100.00% | 3 | 4 | 6 | 0.05% | 6.70%  | LLQVDE<br>SIKPEQ<br>EFFTAPF<br>EK | 2.79 | 2,608.35 |
| Control | 6011 | PREDICTED:<br>similar to<br>Transmembrane<br>protein<br>16F | gi 119892265                           | 106,290.10 | 100.00% | 3 | 4 | 6 | 0.05% | 6.70%  | MNDFYI<br>QDRDTF<br>FNPATR        | 3.47 | 2,267.02 |
| Control | 6011 | PREDICTED:<br>similar to<br>Transmembrane<br>protein<br>16F | gi 119892265                           | 106,290.10 | 100.00% | 3 | 4 | 6 | 0.05% | 6.70%  | TPEFEEF<br>NGKPSD<br>LYFNDG<br>QR | 4.06 | 2,490.12 |
| Control | 6011 | Vesicle-associated<br>membrane<br>protein<br>7              | gi 109658341,gi 115495041,gi 122144644 | 24,944.90  | 100.00% | 3 | 3 | 3 | 0.02% | 11.40% | AFNFLN<br>EIK                     | 2.8  | 1,095.58 |
| Control | 6011 | Vesicle-associated<br>membrane<br>protein<br>7              | gi 109658341,gi 115495041,gi 122144644 | 24,944.90  | 100.00% | 3 | 3 | 3 | 0.02% | 11.40% | GLDKVM<br>ETQAQV<br>DELK          | 3.66 | 1,819.91 |
| Control | 6011 | Vesicle-associated<br>membrane<br>protein<br>7              | gi 109658341,gi 115495041,gi 122144644 | 24,944.90  | 100.00% | 3 | 3 | 3 | 0.02% | 11.40% | VMETQA<br>QVDELK                  | 3.32 | 1,406.68 |
| Control | 6011 | VAPB<br>protein                                             | gi 126010784,gi 129270105,gi 160210887 | 27,140.50  | 100.00% | 4 | 5 | 6 | 0.05% | 16.90% | ALSSSLD<br>DTEVKK                 | 4.29 | 1,392.72 |
| Control | 6011 | VAPB<br>protein                                             | gi 126010784,gi 129270105,gi 160210887 | 27,140.50  | 100.00% | 4 | 5 | 6 | 0.05% | 16.90% | FRGPFT<br>DVVTTN<br>LK            | 4.66 | 1,594.86 |
| Control | 6011 | VAPB<br>protein                                             | gi 126010784,gi 129270105,gi 160210887 | 27,140.50  | 100.00% | 4 | 5 | 6 | 0.05% | 16.90% | GPFTDV<br>VTTNLK                  | 3.99 | 1,291.69 |
| Control | 6011 | VAPB<br>protein                                             | gi 126010784,gi 129270105,gi 160210887 | 27,140.50  | 100.00% | 4 | 5 | 6 | 0.05% | 16.90% | VEQVLS<br>LEPQHE<br>LK            | 3.47 | 1,648.89 |
| Control | 6011 | moesin                                                      | gi 114050715,gi 118583148,gi 87578169  | 67,959.00  | 100.00% | 6 | 7 | 7 | 0.05% | 15.10% | APDFVF<br>YAPR                    | 3.75 | 1,182.59 |
| Control | 6011 | moesin                                                      | gi 114050715,gi 118583148,gi 87578169  | 67,959.00  | 100.00% | 6 | 7 | 7 | 0.05% | 15.10% | FYPEDV<br>SEELIQD<br>ITQR         | 3    | 2,082.00 |
| Control | 6011 | moesin                                                      | gi 114050715,gi 118583148,gi 87578169  | 67,959.00  | 100.00% | 6 | 7 | 7 | 0.05% | 15.10% | GMLRED<br>AVLEYL<br>K             | 3.59 | 1,552.80 |



|         |      |                                                                                                                                 |                                       |           |         |   |   |   |       |        |                                                    |      |          |
|---------|------|---------------------------------------------------------------------------------------------------------------------------------|---------------------------------------|-----------|---------|---|---|---|-------|--------|----------------------------------------------------|------|----------|
| Control | 6011 | moesin                                                                                                                          | gi 114050715,gi 118583148,gi 87578169 | 67,959.00 | 100.00% | 6 | 7 | 7 | 0.05% | 15.10% | KAPDFV<br>FYAPR                                    | 2.03 | 1,310.69 |
| Control | 6011 | moesin                                                                                                                          | gi 114050715,gi 118583148,gi 87578169 | 67,959.00 | 100.00% | 6 | 7 | 7 | 0.05% | 15.10% | TAMSTP<br>HVAEPA<br>ENEQDE<br>QDENG<br>EASAEL<br>R | 5.12 | 3,342.43 |
| Control | 6011 | moesin                                                                                                                          | gi 114050715,gi 118583148,gi 87578169 | 67,959.00 | 100.00% | 6 | 7 | 7 | 0.05% | 15.10% | TQEQLA<br>LEMAEL<br>TAR                            | 3.64 | 1,719.86 |
| Control | 6011 | PREDICTED:<br>similar to<br>Keratin,<br>type I<br>cytoskeletal<br>24<br>(Cytokeratin-24)<br>(Keratin-24)<br>(Type I keratin-24) | gi 194676109                          | 55,111.70 | 99.80%  | 2 | 3 | 4 | 0.03% | 5.33%  | KVLDDL<br>TMTR                                     | 2.72 | 1,207.64 |
| Control | 6011 | PREDICTED:<br>similar to<br>Keratin,<br>type I<br>cytoskeletal<br>24<br>(Cytokeratin-24)<br>(Keratin-24)<br>(Type I keratin-24) | gi 194676109                          | 55,111.70 | 99.80%  | 2 | 3 | 4 | 0.03% | 5.33%  | SDLEMQ<br>IESLTEE<br>LAYLK                         | 3.96 | 2,112.04 |
| Control | 6011 | H2A histone family, member Y                                                                                                    | gi 114052404,gi 87578157              | 39,516.80 | 100.00% | 2 | 4 | 5 | 0.04% | 13.70% | AASADS<br>TTEGTP<br>ADGFTV<br>LSTK                 | 3.7  | 2,127.01 |
| Control | 6011 | H2A histone family, member Y                                                                                                    | gi 114052404,gi 87578157              | 39,516.80 | 100.00% | 2 | 4 | 5 | 0.04% | 13.70% | IGVGAP<br>VYMAA<br>VLEYLT<br>AEILELA<br>GNAAR      | 4.33 | 2,991.59 |
| Control | 6011 | PREDICTED:<br>transmembrane protein 33 isoform 2                                                                                | gi 119893815,gi 119922774             | 27,968.00 | 99.80%  | 2 | 2 | 3 | 0.02% | 8.10%  | ALLANA<br>LTSALR                                   | 5.08 | 1,213.73 |
| Control | 6011 | PREDICTED:<br>transmembrane protein 33 isoform 2                                                                                | gi 119893815,gi 119922774             | 27,968.00 | 99.80%  | 2 | 2 | 3 | 0.02% | 8.10%  | LPHFQLS<br>R                                       | 2.64 | 997.5578 |

|         |      |                                                                                                                   |                                                                         |           |         |   |   |    |       |        |                            |      |          |
|---------|------|-------------------------------------------------------------------------------------------------------------------|-------------------------------------------------------------------------|-----------|---------|---|---|----|-------|--------|----------------------------|------|----------|
| Control | 6011 | Chain A, gi 1578335<br>Crystallization And Structure Determination Of Bovine Profilin At 2.0 Angstroms Resolution | 36,gi 157878211,gi 576369,gi 59858521,gi 628870,gi 62751593,gi 73586531 | 15,039.50 | 100.00% | 5 | 8 | 14 | 0.11% | 45.00% | DSLLQD<br>GEFTMD<br>LR     | 3.84 | 1,655.76 |
| Control | 6011 | Chain A, gi 1578335<br>Crystallization And Structure Determination Of Bovine Profilin At 2.0 Angstroms Resolution | 36,gi 157878211,gi 576369,gi 59858521,gi 628870,gi 62751593,gi 73586531 | 15,039.50 | 100.00% | 5 | 8 | 14 | 0.11% | 45.00% | SSFFVNG<br>LTLGGQ<br>K     | 3.91 | 1,454.76 |
| Control | 6011 | Chain A, gi 1578335<br>Crystallization And Structure Determination Of Bovine Profilin At 2.0 Angstroms Resolution | 36,gi 157878211,gi 576369,gi 59858521,gi 628870,gi 62751593,gi 73586531 | 15,039.50 | 100.00% | 5 | 8 | 14 | 0.11% | 45.00% | STGGAP<br>TFNITVT<br>MTAK  | 4.04 | 1,712.85 |
| Control | 6011 | Chain A, gi 1578335<br>Crystallization And Structure Determination Of Bovine Profilin At 2.0 Angstroms Resolution | 36,gi 157878211,gi 576369,gi 59858521,gi 628870,gi 62751593,gi 73586531 | 15,039.50 | 100.00% | 5 | 8 | 14 | 0.11% | 45.00% | TFVNITP<br>AEVGILV<br>GK   | 4.62 | 1,657.95 |
| Control | 6011 | Chain A, gi 1578335<br>Crystallization And Structure Determination Of Bovine Profilin At 2.0 Angstroms Resolution | 36,gi 157878211,gi 576369,gi 59858521,gi 628870,gi 62751593,gi 73586531 | 15,039.50 | 100.00% | 5 | 8 | 14 | 0.11% | 45.00% | TFVNITP<br>AEVGILV<br>GKDR | 3.23 | 1,929.08 |

|         |      |                                                                   |            |            |         |   |   |   |       |        |                                      |      |          |
|---------|------|-------------------------------------------------------------------|------------|------------|---------|---|---|---|-------|--------|--------------------------------------|------|----------|
| Control | 6011 | procollagen-lysine, 2-oxoglutarate 5-dioxygenase 3 precursor      | gi 1462318 | 85,878.90  | 99.80%  | 2 | 2 | 2 | 0.02% | 4.39%  | FLNMSG<br>FIGFAPTI<br>HQIVR          | 2.72 | 2,074.12 |
| Control | 6011 | procollagen-lysine, 2-oxoglutarate 5-dioxygenase 3 precursor      | gi 1462318 | 85,878.90  | 99.80%  | 2 | 2 | 2 | 0.02% | 4.39%  | LVGPEE<br>ALTPGE<br>AR               | 3.05 | 1,438.75 |
| Control | 6011 | PREDICTED: ATPase type 13A1 isoform 1                             | gi 7662098 | 132,577.20 | 99.90%  | 2 | 3 | 4 | 0.03% | 2.92%  | FLPVAFP<br>VGNAFS<br>FYQSNR          | 4.81 | 2,161.09 |
| Control | 6011 | PREDICTED: ATPase type 13A1 isoform 1                             | gi 7662098 | 132,577.20 | 99.90%  | 2 | 3 | 4 | 0.03% | 2.92%  | SIDGISE<br>PLAQGS<br>PK              | 3.93 | 1,585.81 |
| Control | 6011 | PREDICTED: similar to intercellular adhesion molecule-2 isoform 1 | gi 1199125 | 30,746.10  | 99.80%  | 2 | 3 | 5 | 0.04% | 12.00% | DEELCS<br>FTCAGK<br>QEMK             | 2.98 | 1,931.86 |
| Control | 6011 | PREDICTED: similar to intercellular adhesion molecule-2 isoform 1 | gi 1199125 | 30,746.10  | 99.80%  | 2 | 3 | 5 | 0.04% | 12.00% | VPAVAP<br>LEGLTV<br>TLLR             | 4.22 | 1,649.00 |
| Control | 6011 | Heme oxygenase (decyclin g) 1                                     | gi 1584551 | 32,922.40  | 100.00% | 6 | 8 | 9 | 0.07% | 25.60% | ALNLPSS<br>GEGRAF<br>FTFPNIA<br>SATK | 4.26 | 2,453.27 |
| Control | 6011 | Heme oxygenase (decyclin g) 1                                     | gi 1584551 | 32,922.40  | 100.00% | 6 | 8 | 9 | 0.07% | 25.60% | ENPVYT<br>PLYFPPE<br>LHR             | 3.06 | 2,003.99 |
| Control | 6011 | Heme oxygenase (decyclin g) 1                                     | gi 1584551 | 32,922.40  | 100.00% | 6 | 8 | 9 | 0.07% | 25.60% | LVMASL<br>YHIYVA<br>LEEEIER          | 3.45 | 2,294.17 |
| Control | 6011 | Heme oxygenase (decyclin g) 1                                     | gi 1584551 | 32,922.40  | 100.00% | 6 | 8 | 9 | 0.07% | 25.60% | NKENPV<br>YTPLYFP<br>EELHR           | 6.32 | 2,246.12 |

|         |      |                                                                             |                                                  |            |         |   |   |   |       |        |                                                              |      |          |
|---------|------|-----------------------------------------------------------------------------|--------------------------------------------------|------------|---------|---|---|---|-------|--------|--------------------------------------------------------------|------|----------|
| Control | 6011 | Heme oxygenase (decyclin g) 1                                               | gi 158455152,gi 59858301,gi 62460520,gi 73919958 | 32,922.40  | 100.00% | 6 | 8 | 9 | 0.07% | 25.60% | YLGDLG<br>GGQVLK                                             | 2.94 | 1,249.68 |
| Control | 6011 | Heme oxygenase (decyclin g) 1                                               | gi 158455152,gi 59858301,gi 62460520,gi 73919958 | 32,922.40  | 100.00% | 6 | 8 | 9 | 0.07% | 25.60% | YLGDLG<br>GGQVLK<br>K                                        | 3.51 | 1,377.77 |
| Control | 6011 | HADHA protein 5                                                             | gi 74268185                                      | 83,232.60  | 100.00% | 4 | 5 | 5 | 0.04% | 10.90% | DTTASA<br>VDVGLR                                             | 3.43 | 1,204.62 |
| Control | 6011 | HADHA protein 5                                                             | gi 74268185                                      | 83,232.60  | 100.00% | 4 | 5 | 5 | 0.04% | 10.90% | MQLLEI<br>TTEK                                               | 3.77 | 1,334.72 |
| Control | 6011 | HADHA protein 5                                                             | gi 74268185                                      | 83,232.60  | 100.00% | 4 | 5 | 5 | 0.04% | 10.90% | SAVLIST<br>KPGCFIA<br>GADLNM<br>LNSCTTS<br>QEVTSQIS<br>QEAQK | 4.9  | 4,084.00 |
| Control | 6011 | HADHA protein 5                                                             | gi 74268185                                      | 83,232.60  | 100.00% | 4 | 5 | 5 | 0.04% | 10.90% | TVLGSP<br>EVLLGIL<br>PGAGAT<br>QR                            | 4.03 | 2,049.17 |
| Control | 6011 | RecName : Full=Thrombospondin-1; Flags: Precursor                           | gi 12644428,gi 2244707,gi 41386685               | 129,515.10 | 100.00% | 3 | 3 | 3 | 0.02% | 3.50%  | FVFGTTP<br>EDILR                                             | 3.1  | 1,394.73 |
| Control | 6011 | RecName : Full=Thrombospondin-1; Flags: Precursor                           | gi 12644428,gi 2244707,gi 41386685               | 129,515.10 | 100.00% | 3 | 3 | 3 | 0.02% | 3.50%  | GGVNDN<br>FQGVLLQ<br>NVR                                     | 3.38 | 1,616.81 |
| Control | 6011 | RecName : Full=Thrombospondin-1; Flags: Precursor                           | gi 12644428,gi 2244707,gi 41386685               | 129,515.10 | 100.00% | 3 | 3 | 3 | 0.02% | 3.50%  | KVTEEN<br>KELANE<br>LR                                       | 4.28 | 1,672.89 |
| Control | 6011 | annexin 5                                                                   | gi 119936560,gi 120474983,gi 260137,gi 73586525  | 36,057.60  | 99.80%  | 2 | 2 | 3 | 0.02% | 9.97%  | DLDDDL<br>KSELTG<br>KFEK                                     | 2.75 | 1,850.98 |
| Control | 6011 | annexin 5                                                                   | gi 119936560,gi 120474983,gi 260137,gi 73586525  | 36,057.60  | 99.80%  | 2 | 2 | 3 | 0.02% | 9.97%  | GLGTDE<br>ESILTLL<br>TSR                                     | 4.3  | 1,704.90 |
| Control | 6011 | RecName : Full=Thrombospondin domain-containing protein 4; Flags: Precursor | gi 108861917,gi 74354589,gi 78042524             | 46,819.40  | 100.00% | 4 | 4 | 6 | 0.05% | 24.10% | FSQMLH<br>PIFEEAS<br>NVIKEE<br>YPNANQ<br>VVFAR               | 5.12 | 3,523.73 |

|         |      |                                                                                                                         |                                                  |           |         |   |   |   |       |        |                                                            |          |
|---------|------|-------------------------------------------------------------------------------------------------------------------------|--------------------------------------------------|-----------|---------|---|---|---|-------|--------|------------------------------------------------------------|----------|
| Control | 6011 | RecName<br>:<br>Full=Thi<br>oredoxin<br>domain-<br>containin<br>g protein<br>4; Flags:<br>Precursor                     | gi 1088619<br>17.gi 74354<br>589.gi 7804<br>2524 | 46,819.40 | 100.00% | 4 | 4 | 6 | 0.05% | 24.10% | HMYVFG 2.54<br>DFRDVLI<br>PGK                              | 1,909.96 |
| Control | 6011 | RecName<br>:<br>Full=Thi<br>oredoxin<br>domain-<br>containin<br>g protein<br>4; Flags:<br>Precursor                     | gi 1088619<br>17.gi 74354<br>589.gi 7804<br>2524 | 46,819.40 | 100.00% | 4 | 4 | 6 | 0.05% | 24.10% | LHREFH 2.21<br>HGPDPT<br>DTAPGE<br>EVQDVA<br>SSPPSS<br>FQK | 3,728.72 |
| Control | 6011 | RecName<br>:<br>Full=Thi<br>oredoxin<br>domain-<br>containin<br>g protein<br>4; Flags:<br>Precursor                     | gi 1088619<br>17.gi 74354<br>589.gi 7804<br>2524 | 46,819.40 | 100.00% | 4 | 4 | 6 | 0.05% | 24.10% | SDPIQEL 5.08<br>HDLAEIT<br>TPDR                            | 2,050.01 |
| Control | 6011 | RecName<br>:<br>Full=Apo<br>lipoprotei<br>n O-like;<br>AltName:<br>Full=Prot<br>ein<br>FAM121<br>A; Flags:<br>Precursor | gi 1259875<br>81.gi 74268<br>422.gi 7804<br>2526 | 29,097.30 | 99.80%  | 2 | 2 | 2 | 0.02% | 11.70% | KAYATS 3.16<br>QQMYEA<br>VK                                | 1,633.79 |
| Control | 6011 | RecName<br>:<br>Full=Apo<br>lipoprotei<br>n O-like;<br>AltName:<br>Full=Prot<br>ein<br>FAM121<br>A; Flags:<br>Precursor | gi 1259875<br>81.gi 74268<br>422.gi 7804<br>2526 | 29,097.30 | 99.80%  | 2 | 2 | 2 | 0.02% | 11.70% | YVEEQP 2.7<br>GHLQMG<br>FASIR                              | 1,977.95 |

|         |      |                                                                                                                                                                                         |                                                                                                                                        |           |         |   |   |   |       |        |                                           |          |
|---------|------|-----------------------------------------------------------------------------------------------------------------------------------------------------------------------------------------|----------------------------------------------------------------------------------------------------------------------------------------|-----------|---------|---|---|---|-------|--------|-------------------------------------------|----------|
| Control | 6011 | RecName<br>:<br>Full=Mit<br>ochondri<br>al 2-<br>oxoglutar<br>ate/malat<br>e carrier<br>protein;<br>Short=O<br>GCP;<br>AltName:<br>Full=Solu<br>te carrier<br>family 25<br>member<br>11 | gi 126664.g<br>i 14623167<br>6,gi 148744<br>036,gi 1488<br>78065,gi 16<br>3432,gi 163<br>434,gi 2780<br>7211,gi 32,<br>gi 5985797<br>7 | 33,881.70 | 100.00% | 4 | 6 | 7 | 0.05% | 22.50% | AVIGMT 4.75<br>AGATGA<br>FVGTPA<br>EVALIR | 2,289.23 |
| Control | 6011 | RecName<br>:<br>Full=Mit<br>ochondri<br>al 2-<br>oxoglutar<br>ate/malat<br>e carrier<br>protein;<br>Short=O<br>GCP;<br>AltName:<br>Full=Solu<br>te carrier<br>family 25<br>member<br>11 | gi 126664.g<br>i 14623167<br>6,gi 148744<br>036,gi 1488<br>78065,gi 16<br>3432,gi 163<br>434,gi 2780<br>7211,gi 32,<br>gi 5985797<br>7 | 33,881.70 | 100.00% | 4 | 6 | 7 | 0.05% | 22.50% | AVVVNA 4.12<br>AQLASY<br>SQSK             | 1,635.87 |
| Control | 6011 | RecName<br>:<br>Full=Mit<br>ochondri<br>al 2-<br>oxoglutar<br>ate/malat<br>e carrier<br>protein;<br>Short=O<br>GCP;<br>AltName:<br>Full=Solu<br>te carrier<br>family 25<br>member<br>11 | gi 126664.g<br>i 14623167<br>6,gi 148744<br>036,gi 1488<br>78065,gi 16<br>3432,gi 163<br>434,gi 2780<br>7211,gi 32,<br>gi 5985797<br>7 | 33,881.70 | 100.00% | 4 | 6 | 7 | 0.05% | 22.50% | FLFGGL 3.78<br>AGMGAT<br>VFVQPL<br>DLVK   | 2,296.24 |

|         |      |                                                                                                                                                                                         |                                                                                                                                        |           |         |    |    |    |       |        |                                      |      |          |
|---------|------|-----------------------------------------------------------------------------------------------------------------------------------------------------------------------------------------|----------------------------------------------------------------------------------------------------------------------------------------|-----------|---------|----|----|----|-------|--------|--------------------------------------|------|----------|
| Control | 6011 | RecName<br>:<br>Full=Mit<br>ochondri<br>al 2-<br>oxoglutar<br>ate/malat<br>e carrier<br>protein;<br>Short=O<br>GCP;<br>AltName:<br>Full=Solu<br>te carrier<br>family 25<br>member<br>11 | gi 126664.g<br>i 14623167<br>6,gi 148744<br>036,gi 1488<br>78065,gi 16<br>3432,gi 163<br>434,gi 2780<br>7211,gi 32,<br>gi 5985797<br>7 | 33,881.70 | 100.00% | 4  | 6  | 7  | 0.05% | 22.50% | NVFNAL<br>FR                         | 2.38 | 980.5311 |
| Control | 6011 | ER lipid<br>raft<br>associate<br>d 2                                                                                                                                                    | gi 1140510<br>93,gi 12213<br>4590,gi 920<br>97476                                                                                      | 37,713.20 | 100.00% | 6  | 6  | 7  | 0.05% | 28.70% | GGALLT<br>STSGPGF<br>HMLPFI<br>TSYK  | 3.12 | 2,511.30 |
| Control | 6011 | ER lipid<br>raft<br>associate<br>d 2                                                                                                                                                    | gi 1140510<br>93,gi 12213<br>4590,gi 920<br>97476                                                                                      | 37,713.20 | 100.00% | 6  | 6  | 7  | 0.05% | 28.70% | IEVVNFL<br>VPHAVY<br>DIVK            | 3.14 | 1,955.10 |
| Control | 6011 | ER lipid<br>raft<br>associate<br>d 2                                                                                                                                                    | gi 1140510<br>93,gi 12213<br>4590,gi 920<br>97476                                                                                      | 37,713.20 | 100.00% | 6  | 6  | 7  | 0.05% | 28.70% | ISEIEDA<br>AFLAR                     | 3.48 | 1,334.70 |
| Control | 6011 | ER lipid<br>raft<br>associate<br>d 2                                                                                                                                                    | gi 1140510<br>93,gi 12213<br>4590,gi 920<br>97476                                                                                      | 37,713.20 | 100.00% | 6  | 6  | 7  | 0.05% | 28.70% | LALQQD<br>LTSMAP<br>GLVIQA<br>VR     | 4.95 | 2,140.18 |
| Control | 6011 | ER lipid<br>raft<br>associate<br>d 2                                                                                                                                                    | gi 1140510<br>93,gi 12213<br>4590,gi 920<br>97476                                                                                      | 37,713.20 | 100.00% | 6  | 6  | 7  | 0.05% | 28.70% | SVQTTL<br>QTDEVK                     | 3.97 | 1,348.70 |
| Control | 6011 | ER lipid<br>raft<br>associate<br>d 2                                                                                                                                                    | gi 1140510<br>93,gi 12213<br>4590,gi 920<br>97476                                                                                      | 37,713.20 | 100.00% | 6  | 6  | 7  | 0.05% | 28.70% | VAQVAE<br>ITFGQK                     | 3.02 | 1,290.71 |
| Control | 6011 | ATAD3A<br>protein                                                                                                                                                                       | gi 1572788<br>89,gi 15742<br>8048,gi 162<br>416153                                                                                     | 66,090.40 | 100.00% | 10 | 13 | 19 | 0.15% | 22.50% | AAEHRQ<br>TILESIRT<br>AGTLFG<br>EGFR | 1.9  | 2,660.39 |
| Control | 6011 | ATAD3A<br>protein                                                                                                                                                                       | gi 1572788<br>89,gi 15742<br>8048,gi 162<br>416153                                                                                     | 66,090.40 | 100.00% | 10 | 13 | 19 | 0.15% | 22.50% | ATLNAF<br>LHR                        | 2.64 | 1,042.58 |
| Control | 6011 | ATAD3A<br>protein                                                                                                                                                                       | gi 1572788<br>89,gi 15742<br>8048,gi 162<br>416153                                                                                     | 66,090.40 | 100.00% | 10 | 13 | 19 | 0.15% | 22.50% | GLLLFV<br>DEADAF<br>LR               | 3.45 | 1,578.85 |
| Control | 6011 | ATAD3A<br>protein                                                                                                                                                                       | gi 1572788<br>89,gi 15742<br>8048,gi 162<br>416153                                                                                     | 66,090.40 | 100.00% | 10 | 13 | 19 | 0.15% | 22.50% | ITVLEAL<br>R                         | 2.76 | 914.567  |
| Control | 6011 | ATAD3A<br>protein                                                                                                                                                                       | gi 1572788<br>89,gi 15742<br>8048,gi 162<br>416153                                                                                     | 66,090.40 | 100.00% | 10 | 13 | 19 | 0.15% | 22.50% | LKEYEA<br>AVEQLK<br>GDQIR            | 4.87 | 1,990.06 |
| Control | 6011 | ATAD3A<br>protein                                                                                                                                                                       | gi 1572788<br>89,gi 15742<br>8048,gi 162<br>416153                                                                                     | 66,090.40 | 100.00% | 10 | 13 | 19 | 0.15% | 22.50% | MYFDKY<br>VLKPAT<br>EGK              | 2.27 | 1,805.91 |

|         |      |                           |                                                 |           |         |    |    |    |       |        |                                         |          |
|---------|------|---------------------------|-------------------------------------------------|-----------|---------|----|----|----|-------|--------|-----------------------------------------|----------|
| Control | 6011 | ATAD3A protein            | gi 157278889,gi 157428048,gi 162416153          | 66,090.40 | 100.00% | 10 | 13 | 19 | 0.15% | 22.50% | NVLMYG 3.14<br>PPGTGK                   | 1,249.62 |
| Control | 6011 | ATAD3A protein            | gi 157278889,gi 157428048,gi 162416153          | 66,090.40 | 100.00% | 10 | 13 | 19 | 0.15% | 22.50% | QQQLLN 2.44<br>EENLR                    | 1,384.72 |
| Control | 6011 | ATAD3A protein            | gi 157278889,gi 157428048,gi 162416153          | 66,090.40 | 100.00% | 10 | 13 | 19 | 0.15% | 22.50% | RLLSKP 2.94<br>QDALEG<br>VVLSPSL<br>EAR | 2,378.34 |
| Control | 6011 | ATAD3A protein            | gi 157278889,gi 157428048,gi 162416153          | 66,090.40 | 100.00% | 10 | 13 | 19 | 0.15% | 22.50% | TAGTLF 3.92<br>GEGFR                    | 1,155.58 |
| Control | 6011 | glucose-regulated protein | gi 16041057,gi 27807263,gi 33301108,gi 75775556 | 92,411.40 | 100.00% | 11 | 12 | 14 | 0.11% | 17.90% | AQAYQT 4.67<br>GKDISTN<br>YYASQK        | 2,137.02 |
| Control | 6011 | glucose-regulated protein | gi 16041057,gi 27807263,gi 33301108,gi 75775556 | 92,411.40 | 100.00% | 11 | 12 | 14 | 0.11% | 17.90% | ELISNAS 3.91<br>DALDKI<br>R             | 1,544.83 |
| Control | 6011 | glucose-regulated protein | gi 16041057,gi 27807263,gi 33301108,gi 75775556 | 92,411.40 | 100.00% | 11 | 12 | 14 | 0.11% | 17.90% | EVEEDE 3.11<br>YKAFYK                   | 1,549.71 |
| Control | 6011 | glucose-regulated protein | gi 16041057,gi 27807263,gi 33301108,gi 75775556 | 92,411.40 | 100.00% | 11 | 12 | 14 | 0.11% | 17.90% | FQSSH 5.58<br>PSDMTS<br>LDQYVE<br>R     | 2,280.00 |
| Control | 6011 | glucose-regulated protein | gi 16041057,gi 27807263,gi 33301108,gi 75775556 | 92,411.40 | 100.00% | 11 | 12 | 14 | 0.11% | 17.90% | GLFDEY 2.08<br>GSK                      | 1,015.47 |
| Control | 6011 | glucose-regulated protein | gi 16041057,gi 27807263,gi 33301108,gi 75775556 | 92,411.40 | 100.00% | 11 | 12 | 14 | 0.11% | 17.90% | GVVDS 4.21<br>DLPLNV<br>SR              | 1,485.75 |
| Control | 6011 | glucose-regulated protein | gi 16041057,gi 27807263,gi 33301108,gi 75775556 | 92,411.40 | 100.00% | 11 | 12 | 14 | 0.11% | 17.90% | LIINSLY 2.32<br>K                       | 963.5874 |
| Control | 6011 | glucose-regulated protein | gi 16041057,gi 27807263,gi 33301108,gi 75775556 | 92,411.40 | 100.00% | 11 | 12 | 14 | 0.11% | 17.90% | LISLTDE 3.23<br>NALAGN<br>EELTVK        | 2,030.07 |
| Control | 6011 | glucose-regulated protein | gi 16041057,gi 27807263,gi 33301108,gi 75775556 | 92,411.40 | 100.00% | 11 | 12 | 14 | 0.11% | 17.90% | NLLHVT 4.45<br>DTGVG<br>MTR             | 1,529.77 |



|         |      |                                                                                  |                                                 |            |         |    |    |    |       |        |                                    |      |          |
|---------|------|----------------------------------------------------------------------------------|-------------------------------------------------|------------|---------|----|----|----|-------|--------|------------------------------------|------|----------|
| Control | 6011 | glucose-regulated protein GRP94 precursor                                        | gi 16041057,gi 27807263,gi 33301108,gi 75775556 | 92,411.40  | 100.00% | 11 | 12 | 14 | 0.11% | 17.90% | NLLHVT<br>DTGVG<br>MTREEL<br>VK    | 3.23 | 2,128.11 |
| Control | 6011 | glucose-regulated protein GRP94 precursor                                        | gi 16041057,gi 27807263,gi 33301108,gi 75775556 | 92,411.40  | 100.00% | 11 | 12 | 14 | 0.11% | 17.90% | SILFVPT<br>SAPR                    | 3.68 | 1,187.68 |
| Control | 6011 | PREDICTED: similar to FXFD domain-containing ion transport regulator 5 isoform 1 | gi 76641186                                     | 18,921.80  | 99.80%  | 2  | 2  | 2  | 0.02% | 10.40% | EDDPFF<br>YDEDTL<br>R              | 3.17 | 1,661.70 |
| Control | 6011 | PREDICTED: similar to FXFD domain-containing ion transport regulator 5 isoform 1 | gi 76641186                                     | 18,921.80  | 99.80%  | 2  | 2  | 2  | 0.02% | 10.40% | QPGSKE<br>DDPPFY<br>DEDTLR         | 3.08 | 2,158.96 |
| Control | 6011 | ALDH4A1 protein                                                                  | gi 157278942,gi 157785571,gi 193806687          | 61,478.10  | 99.80%  | 2  | 2  | 2  | 0.02% | 5.86%  | STGSVV<br>GQQPFG<br>GAR            | 3.68 | 1,447.73 |
| Control | 6011 | ALDH4A1 protein                                                                  | gi 157278942,gi 157785571,gi 193806687          | 61,478.10  | 99.80%  | 2  | 2  | 2  | 0.02% | 5.86%  | TVIQAEI<br>DAAAELI<br>DFFR         | 3.72 | 2,022.05 |
| Control | 6011 | PREDICTED: similar to catenin, delta 1                                           | gi 194673532                                    | 106,846.20 | 100.00% | 10 | 12 | 13 | 0.10% | 13.90% | ALSAIAD<br>LLTNEH<br>ER            | 4.67 | 1,652.86 |
| Control | 6011 | PREDICTED: similar to catenin, delta 1                                           | gi 194673532                                    | 106,846.20 | 100.00% | 10 | 12 | 13 | 0.10% | 13.90% | APSRQD<br>VYGPQP<br>QVR            | 4.95 | 1,697.87 |
| Control | 6011 | PREDICTED: similar to catenin, delta 1                                           | gi 194673532                                    | 106,846.20 | 100.00% | 10 | 12 | 13 | 0.10% | 13.90% | DMDLTE<br>VITGTL<br>WNLSSH<br>DSIK | 3.65 | 2,491.20 |
| Control | 6011 | PREDICTED: similar to catenin, delta 1                                           | gi 194673532                                    | 106,846.20 | 100.00% | 10 | 12 | 13 | 0.10% | 13.90% | FHPEPY<br>GLEDDQ<br>R              | 3.09 | 1,602.72 |
| Control | 6011 | PREDICTED: similar to catenin, delta 1                                           | gi 194673532                                    | 106,846.20 | 100.00% | 10 | 12 | 13 | 0.10% | 13.90% | KPTEDP<br>TNDTVD<br>FPK            | 3.33 | 1,703.81 |

|         |      |                                         |                                                   |            |         |    |    |    |       |        |                                               |      |          |
|---------|------|-----------------------------------------|---------------------------------------------------|------------|---------|----|----|----|-------|--------|-----------------------------------------------|------|----------|
| Control | 6011 | PREDIC TED: similar to catenin, delta 1 | gi 1946735<br>32                                  | 106,846.20 | 100.00% | 10 | 12 | 13 | 0.10% | 13.90% | KPTEDP<br>TNDTVD<br>FPKR                      | 5.69 | 1,859.91 |
| Control | 6011 | PREDIC TED: similar to catenin, delta 1 | gi 1946735<br>32                                  | 106,846.20 | 100.00% | 10 | 12 | 13 | 0.10% | 13.90% | NFHYPY<br>DGYSR                               | 2.97 | 1,352.60 |
| Control | 6011 | PREDIC TED: similar to catenin, delta 1 | gi 1946735<br>32                                  | 106,846.20 | 100.00% | 10 | 12 | 13 | 0.10% | 13.90% | QDVYGP<br>QPQVR                               | 2.63 | 1,286.65 |
| Control | 6011 | PREDIC TED: similar to catenin, delta 1 | gi 1946735<br>32                                  | 106,846.20 | 100.00% | 10 | 12 | 13 | 0.10% | 13.90% | SLDNNY<br>STLNER                              | 2.69 | 1,425.66 |
| Control | 6011 | PREDIC TED: similar to catenin, delta 1 | gi 1946735<br>32                                  | 106,846.20 | 100.00% | 10 | 12 | 13 | 0.10% | 13.90% | TVQPVP<br>MGPDGL<br>PVDASA<br>VSNSYIQ<br>TLGR | 2.93 | 2,985.50 |
| Control | 6011 | FK506 binding protein 11, 19 kDa        | gi 1140533<br>49,gi 12213<br>8212,gi 825<br>71590 | 22,457.80  | 100.00% | 4  | 5  | 12 | 0.09% | 14.80% | DPLVIEL<br>GQK                                | 3.6  | 1,111.64 |
| Control | 6011 | FK506 binding protein 11, 19 kDa        | gi 1140533<br>49,gi 12213<br>8212,gi 825<br>71590 | 22,457.80  | 100.00% | 4  | 5  | 12 | 0.09% | 14.80% | IFDTSLT<br>RDPLVIE<br>LGQK                    | 4.73 | 2,045.13 |
| Control | 6011 | FK506 binding protein 11, 19 kDa        | gi 1140533<br>49,gi 12213<br>8212,gi 825<br>71590 | 22,457.80  | 100.00% | 4  | 5  | 12 | 0.09% | 14.80% | RVIIPSH<br>LAYGK                              | 3.58 | 1,353.80 |
| Control | 6011 | FK506 binding protein 11, 19 kDa        | gi 1140533<br>49,gi 12213<br>8212,gi 825<br>71590 | 22,457.80  | 100.00% | 4  | 5  | 12 | 0.09% | 14.80% | VIIPSHL<br>AYGK                               | 3.04 | 1,197.70 |
| Control | 6011 | SPTLC2 protein                          | gi 1487455<br>25,gi 14964<br>2795                 | 62,871.50  | 100.00% | 7  | 7  | 9  | 0.07% | 20.80% | EEQKDF<br>VSLYQD<br>FENFYT<br>R               | 4.35 | 2,458.12 |
| Control | 6011 | SPTLC2 protein                          | gi 1487455<br>25,gi 14964<br>2795                 | 62,871.50  | 100.00% | 7  | 7  | 9  | 0.07% | 20.80% | GVVDYF<br>GLDPED<br>VDIMMG<br>TFTK            | 2.42 | 2,465.13 |
| Control | 6011 | SPTLC2 protein                          | gi 1487455<br>25,gi 14964<br>2795                 | 62,871.50  | 100.00% | 7  | 7  | 9  | 0.07% | 20.80% | LLKDAIV<br>YGQPR                              | 2.69 | 1,372.79 |
| Control | 6011 | SPTLC2 protein                          | gi 1487455<br>25,gi 14964<br>2795                 | 62,871.50  | 100.00% | 7  | 7  | 9  | 0.07% | 20.80% | LPEVIAL<br>K                                  | 2.48 | 882.566  |
| Control | 6011 | SPTLC2 protein                          | gi 1487455<br>25,gi 14964<br>2795                 | 62,871.50  | 100.00% | 7  | 7  | 9  | 0.07% | 20.80% | NIGVVV<br>VGFPAT<br>PIESR                     | 5.57 | 1,868.06 |
| Control | 6011 | SPTLC2 protein                          | gi 1487455<br>25,gi 14964<br>2795                 | 62,871.50  | 100.00% | 7  | 7  | 9  | 0.07% | 20.80% | QEIGNL<br>DKHEEL<br>EK                        | 2.42 | 1,681.84 |

|         |      |                                              |                           |            |         |   |   |   |       |        |                                      |      |          |
|---------|------|----------------------------------------------|---------------------------|------------|---------|---|---|---|-------|--------|--------------------------------------|------|----------|
| Control | 6011 | SPTLC2 protein                               | gi 148745525,gi 149642795 | 62,871.50  | 100.00% | 7 | 7 | 9 | 0.07% | 20.80% | SSAAAA<br>AAAAGQ<br>IHHVTE<br>NGGLYK | 3.62 | 2,295.15 |
| Control | 6011 | endoglin                                     | gi 115497110,gi 92097469  | 69,885.10  | 99.80%  | 2 | 3 | 5 | 0.04% | 3.25%  | FSFLLR                               | 1.95 | 782.4559 |
| Control | 6011 | endoglin                                     | gi 115497110,gi 92097469  | 69,885.10  | 99.80%  | 2 | 3 | 5 | 0.04% | 3.25%  | LQAPGIP<br>LQLAYD<br>SK              | 4.31 | 1,613.89 |
| Control | 6011 | PREDICTED: similar to neuropilin-1 isoform 1 | gi 76632212,gi 76632226   | 102,993.80 | 100.00% | 6 | 7 | 7 | 0.05% | 10.30% | DKLNPQ<br>STYSEA                     | 3.52 | 1,352.63 |
| Control | 6011 | PREDICTED: similar to neuropilin-1 isoform 1 | gi 76632212,gi 76632226   | 102,993.80 | 100.00% | 6 | 7 | 7 | 0.05% | 10.30% | FVTAVG<br>TQGAISK                    | 3.52 | 1,278.71 |
| Control | 6011 | PREDICTED: similar to neuropilin-1 isoform 1 | gi 76632212,gi 76632226   | 102,993.80 | 100.00% | 6 | 7 | 7 | 0.05% | 10.30% | IAPSSFV<br>SSGPFLF<br>IK             | 4.31 | 1,696.93 |
| Control | 6011 | PREDICTED: similar to neuropilin-1 isoform 1 | gi 76632212,gi 76632226   | 102,993.80 | 100.00% | 6 | 7 | 7 | 0.05% | 10.30% | NLSALE<br>NYNFEL<br>VDGVK            | 2.72 | 1,924.97 |
| Control | 6011 | PREDICTED: similar to neuropilin-1 isoform 1 | gi 76632212,gi 76632226   | 102,993.80 | 100.00% | 6 | 7 | 7 | 0.05% | 10.30% | SFEGNN<br>NYDTPE<br>LR               | 2.83 | 1,655.73 |
| Control | 6011 | PREDICTED: similar to neuropilin-1 isoform 1 | gi 76632212,gi 76632226   | 102,993.80 | 100.00% | 6 | 7 | 7 | 0.05% | 10.30% | TGPIQDH<br>TGDGNFI<br>YSQADE<br>NQK  | 5.31 | 2,535.14 |
| Control | 6011 | PREDICTED: similar to pincher isoform 1      | gi 76627466               | 61,009.90  | 100.00% | 4 | 4 | 4 | 0.03% | 9.07%  | LFEAEA<br>QDLFR                      | 3    | 1,338.67 |
| Control | 6011 | PREDICTED: similar to pincher isoform 1      | gi 76627466               | 61,009.90  | 100.00% | 4 | 4 | 4 | 0.03% | 9.07%  | LIEAVDN<br>MLTNK                     | 3.44 | 1,376.71 |
| Control | 6011 | PREDICTED: similar to pincher isoform 1      | gi 76627466               | 61,009.90  | 100.00% | 4 | 4 | 4 | 0.03% | 9.07%  | SISIIDSP<br>GILSGEK                  | 4.02 | 1,515.83 |
| Control | 6011 | PREDICTED: similar to pincher isoform 1      | gi 76627466               | 61,009.90  | 100.00% | 4 | 4 | 4 | 0.03% | 9.07%  | YLLEQD<br>FPGMR                      | 2.81 | 1,384.66 |

|         |      |                                    |                                                    |           |         |   |   |    |       |        |                            |      |          |
|---------|------|------------------------------------|----------------------------------------------------|-----------|---------|---|---|----|-------|--------|----------------------------|------|----------|
| Control | 6011 | RPS7 protein                       | gi 1488773<br>74,gi 14964<br>2623,gi 205<br>806695 | 22,109.50 | 100.00% | 2 | 2 | 2  | 0.02% | 7.73%  | DVNFEF<br>PEFQL            | 2.69 | 1,384.64 |
| Control | 6011 | RPS7 protein                       | gi 1488773<br>74,gi 14964<br>2623,gi 205<br>806695 | 22,109.50 | 100.00% | 2 | 2 | 2  | 0.02% | 7.73%  | LTGKDV<br>NFEFPEF<br>QL    | 2.83 | 1,783.89 |
| Control | 6011 | RRAS2 protein                      | gi 1487439<br>16,gi 14994<br>4707                  | 23,381.60 | 100.00% | 2 | 2 | 2  | 0.02% | 13.70% | LDILDTA<br>GQEFG<br>AMR    | 3.81 | 1,781.84 |
| Control | 6011 | RRAS2 protein                      | gi 1487439<br>16,gi 14994<br>4707                  | 23,381.60 | 100.00% | 2 | 2 | 2  | 0.02% | 13.70% | MNVDQ<br>AFHELV<br>R       | 2.99 | 1,474.71 |
| Control | 6011 | adenine nucleotide translocat or 2 | gi 1864249<br>6,gi 321893<br>34,gi 74355<br>032    | 32,938.60 | 99.80%  | 2 | 2 | 27 | 0.21% | 34.20% | AAAYFGI<br>YDTAK           | 4.01 | 1,219.60 |
| Control | 6011 | adenine nucleotide translocat or 2 | gi 1864249<br>6,gi 321893<br>34,gi 74355<br>032    | 32,938.60 | 99.80%  | 2 | 2 | 27 | 0.21% | 34.20% | DFLAGG<br>VAAAIS<br>K      | 5.16 | 1,219.67 |
| Control | 6011 | adenine nucleotide translocat or 2 | gi 1864249<br>6,gi 321893<br>34,gi 74355<br>032    | 32,938.60 | 99.80%  | 2 | 2 | 27 | 0.21% | 34.20% | EQGVLS<br>FWR              | 2.58 | 1,121.57 |
| Control | 6011 | adenine nucleotide translocat or 2 | gi 1864249<br>6,gi 321893<br>34,gi 74355<br>032    | 32,938.60 | 99.80%  | 2 | 2 | 27 | 0.21% | 34.20% | GLYQGF<br>NVSQQ<br>IIYR    | 2.63 | 1,927.04 |
| Control | 6011 | adenine nucleotide translocat or 2 | gi 1864249<br>6,gi 321893<br>34,gi 74355<br>032    | 32,938.60 | 99.80%  | 2 | 2 | 27 | 0.21% | 34.20% | GMGGAF<br>VLVLYD<br>EIK    | 4.27 | 1,627.84 |
| Control | 6011 | adenine nucleotide translocat or 2 | gi 1864249<br>6,gi 321893<br>34,gi 74355<br>032    | 32,938.60 | 99.80%  | 2 | 2 | 27 | 0.21% | 34.20% | GMGGAF<br>VLVLYD<br>EIKK   | 3.05 | 1,755.94 |
| Control | 6011 | adenine nucleotide translocat or 2 | gi 1864249<br>6,gi 321893<br>34,gi 74355<br>032    | 32,938.60 | 99.80%  | 2 | 2 | 27 | 0.21% | 34.20% | GMGGAF<br>VLVLYD<br>EIKKFT | 3.12 | 2,004.05 |
| Control | 6011 | adenine nucleotide translocat or 2 | gi 1864249<br>6,gi 321893<br>34,gi 74355<br>032    | 32,938.60 | 99.80%  | 2 | 2 | 27 | 0.21% | 34.20% | LLLQVQ<br>HASK             | 2.8  | 1,136.68 |
| Control | 6011 | adenine nucleotide translocat or 2 | gi 1864249<br>6,gi 321893<br>34,gi 74355<br>032    | 32,938.60 | 99.80%  | 2 | 2 | 27 | 0.21% | 34.20% | QIFLGGV<br>DKR             | 1.84 | 1,132.65 |
| Control | 6011 | adenine nucleotide translocat or 2 | gi 1864249<br>6,gi 321893<br>34,gi 74355<br>032    | 32,938.60 | 99.80%  | 2 | 2 | 27 | 0.21% | 34.20% | YFPTQA<br>LNFAFK           | 3.99 | 1,446.74 |
| Control | 6011 | adenine nucleotide translocat or 2 | gi 1864249<br>6,gi 321893<br>34,gi 74355<br>032    | 32,938.60 | 99.80%  | 2 | 2 | 27 | 0.21% | 34.20% | YFPTQA<br>LNFAFK<br>DK     | 3.69 | 1,689.86 |

|         |      |                                                                         |                                                                                                 |           |         |   |   |   |       |        |                                              |      |          |
|---------|------|-------------------------------------------------------------------------|-------------------------------------------------------------------------------------------------|-----------|---------|---|---|---|-------|--------|----------------------------------------------|------|----------|
| Control | 6011 | PREDICTED: similar to interferon-induced protein 44-like                | gi 1946656<br>91.gi 19468<br>5057                                                               | 49,925.50 | 99.80%  | 2 | 2 | 2 | 0.02% | 5.90%  | AMISQS<br>QIQNVN<br>K                        | 4.53 | 1,476.75 |
| Control | 6011 | PREDICTED: similar to interferon-induced protein 44-like                | gi 1946656<br>91.gi 19468<br>5057                                                               | 49,925.50 | 99.80%  | 2 | 2 | 2 | 0.02% | 5.90%  | VEGIKD<br>EAGYIN<br>R                        | 3.17 | 1,463.75 |
| Control | 6011 | STX6 protein                                                            | gi 1260106<br>83.gi 12672<br>3527                                                               | 29,055.10 | 99.80%  | 2 | 2 | 2 | 0.02% | 14.10% | AVNTAQ<br>GLFQR                              | 3.58 | 1,204.64 |
| Control | 6011 | STX6 protein                                                            | gi 1260106<br>83.gi 12672<br>3527                                                               | 29,055.10 | 99.80%  | 2 | 2 | 2 | 0.02% | 14.10% | IGGELEE<br>QAVMLD<br>DFSHELE<br>STQSR        | 3.24 | 2,836.29 |
| Control | 6011 | ERGIC and golgi 2                                                       | gi 1139121<br>14.gi 11549<br>7448                                                               | 42,596.10 | 99.80%  | 2 | 2 | 2 | 0.02% | 9.28%  | IDHLSFG<br>ELVPGII<br>NPLDGT<br>EK           | 3.12 | 2,364.25 |
| Control | 6011 | ERGIC and golgi 2                                                       | gi 1139121<br>14.gi 11549<br>7448                                                               | 42,596.10 | 99.80%  | 2 | 2 | 2 | 0.02% | 9.28%  | ISADTHQ<br>FAVTER                            | 3.16 | 1,474.73 |
| Control | 6011 | heme oxygenase (decyclin g) 2                                           | gi 1644487<br>21                                                                                | 37,538.70 | 100.00% | 4 | 5 | 6 | 0.05% | 19.80% | AFEFNM<br>QVFNEL<br>DQAGSL<br>LAK            | 3.23 | 2,388.15 |
| Control | 6011 | heme oxygenase (decyclin g) 2                                           | gi 1644487<br>21                                                                                | 37,538.70 | 100.00% | 4 | 5 | 6 | 0.05% | 19.80% | IHEVGQ<br>NEPELL<br>VAHAYT<br>R              | 5    | 2,176.11 |
| Control | 6011 | heme oxygenase (decyclin g) 2                                           | gi 1644487<br>21                                                                                | 37,538.70 | 100.00% | 4 | 5 | 6 | 0.05% | 19.80% | LPTQDG<br>LPVHDG<br>K                        | 2.56 | 1,376.72 |
| Control | 6011 | heme oxygenase (decyclin g) 2                                           | gi 1644487<br>21                                                                                | 37,538.70 | 100.00% | 4 | 5 | 6 | 0.05% | 19.80% | YMGDLS<br>GGQVLK<br>K                        | 2.68 | 1,411.73 |
| Control | 6011 | endothelial differentiation, sphingolipid G-protein-coupled receptor, 1 | gi 5985811<br>9.gi 606502<br>08.gi 60650<br>268.gi 6188<br>9066.gi 750<br>70049.gi 88<br>954151 | 42,933.90 | 100.00% | 3 | 3 | 4 | 0.03% | 11.30% | FTRPIA<br>GMEFSR                             | 3.84 | 1,540.79 |
| Control | 6011 | endothelial differentiation, sphingolipid G-protein-coupled receptor, 1 | gi 5985811<br>9.gi 606502<br>08.gi 60650<br>268.gi 6188<br>9066.gi 750<br>70049.gi 88<br>954151 | 42,933.90 | 100.00% | 3 | 3 | 4 | 0.03% | 11.30% | SDNSSH<br>PQKDDG<br>DNPETI<br>MSSGNV<br>NSSS | 3.94 | 2,922.19 |

|         |      |                                                                         |                                                             |           |         |   |   |    |       |        |                                                |      |          |
|---------|------|-------------------------------------------------------------------------|-------------------------------------------------------------|-----------|---------|---|---|----|-------|--------|------------------------------------------------|------|----------|
| Control | 6011 | endothelial differentiation, sphingolipid G-protein-coupled receptor, 1 | gi 59858119,gi 60650208,gi 61889066,gi 75070049,gi 88954151 | 42,933.90 | 100.00% | 3 | 3 | 4  | 0.03% | 11.30% | SKSDNS<br>SHPQKD<br>DGDNPE<br>TIMSSG<br>NVNSSS | 3.72 | 3,137.32 |
| Control | 6011 | Chromosome 20 open reading frame 108 ortholog                           | gi 119224079,gi 122692571                                   | 20,430.00 | 99.80%  | 2 | 2 | 2  | 0.02% | 12.50% | ISITLVS<br>VPLIVR                              | 3.47 | 1,409.91 |
| Control | 6011 | Chromosome 20 open reading frame 108 ortholog                           | gi 119224079,gi 122692571                                   | 20,430.00 | 99.80%  | 2 | 2 | 2  | 0.02% | 12.50% | VGIFKPP<br>AAKP                                | 2.65 | 1,124.68 |
| Control | 6011 | PREDICTED: similar to mKIAA4036 protein isoform 2                       | gi 119917518                                                | 67,513.30 | 100.00% | 5 | 7 | 10 | 0.08% | 11.10% | DAFVYA<br>IK                                   | 2.05 | 926.4982 |
| Control | 6011 | PREDICTED: similar to mKIAA4036 protein isoform 2                       | gi 119917518                                                | 67,513.30 | 100.00% | 5 | 7 | 10 | 0.08% | 11.10% | KLEIGFN<br>GNR                                 | 3.08 | 1,147.62 |
| Control | 6011 | PREDICTED: similar to mKIAA4036 protein isoform 2                       | gi 119917518                                                | 67,513.30 | 100.00% | 5 | 7 | 10 | 0.08% | 11.10% | SISHYHE<br>TLGEAL<br>QGVELE<br>FSGLDIK         | 4.12 | 2,872.44 |
| Control | 6011 | PREDICTED: similar to mKIAA4036 protein isoform 2                       | gi 119917518                                                | 67,513.30 | 100.00% | 5 | 7 | 10 | 0.08% | 11.10% | VNAVPR<br>PIPEK                                | 3.11 | 1,219.72 |
| Control | 6011 | PREDICTED: similar to mKIAA4036 protein isoform 2                       | gi 119917518                                                | 67,513.30 | 100.00% | 5 | 7 | 10 | 0.08% | 11.10% | YLDPSFF<br>QHR                                 | 2.15 | 1,309.63 |

|         |      |                                                                                                                |            |           |         |   |   |    |       |        |                   |      |          |
|---------|------|----------------------------------------------------------------------------------------------------------------|------------|-----------|---------|---|---|----|-------|--------|-------------------|------|----------|
| Control | 6011 | PREDIC TED: 20<br>similar to Transmembrane emp24 domain-containing protein 2 precursor (Membrane protein p24A) | gi 1946746 | 22,715.40 | 99.80%  | 2 | 2 | 8  | 0.06% | 12.40% | IVMFTID IGEAPK    | 3.46 | 1,449.77 |
| Control | 6011 | PREDIC TED: 20<br>similar to Transmembrane emp24 domain-containing protein 2 precursor (Membrane protein p24A) | gi 1946746 | 22,715.40 | 99.80%  | 2 | 2 | 8  | 0.06% | 12.40% | YTFAAH MDGTY K    | 3.25 | 1,420.62 |
| Control | 6011 | PREDIC TED: 7<br>integrin, beta 3 (platelet glycoprotein IIIa, antigen CD61)                                   | gi 7667065 | 86,518.30 | 100.00% | 6 | 7 | 12 | 0.09% | 9.18%  | EATSTFT NITYR     | 3.33 | 1,403.68 |
| Control | 6011 | isoform 1<br>PREDIC TED: 7<br>integrin, beta 3 (platelet glycoprotein IIIa, antigen CD61)                      | gi 7667065 | 86,518.30 | 100.00% | 6 | 7 | 12 | 0.09% | 9.18%  | GTGDSS QITQVSP QR | 4.21 | 1,560.76 |
| Control | 6011 | isoform 1<br>PREDIC TED: 7<br>integrin, beta 3 (platelet glycoprotein IIIa, antigen CD61)                      | gi 7667065 | 86,518.30 | 100.00% | 6 | 7 | 12 | 0.09% | 9.18%  | HVLTLT DQVTR      | 3.25 | 1,282.71 |

|         |      |                                                                                                               |                                                                  |           |         |   |   |    |       |        |                                            |          |
|---------|------|---------------------------------------------------------------------------------------------------------------|------------------------------------------------------------------|-----------|---------|---|---|----|-------|--------|--------------------------------------------|----------|
| Control | 6011 | PREDIC<br>TED:<br>integrin,<br>beta 3<br>(platelet<br>glycoprot<br>ein IIIa,<br>antigen<br>CD61)<br>isoform 1 | gi 7667065<br>7                                                  | 86,518.30 | 100.00% | 6 | 7 | 12 | 0.09% | 9.18%  | IGFGAFV 3.82<br>DKPVSP<br>YMYISPP<br>EAIR  | 2,670.36 |
| Control | 6011 | PREDIC<br>TED:<br>integrin,<br>beta 3<br>(platelet<br>glycoprot<br>ein IIIa,<br>antigen<br>CD61)<br>isoform 1 | gi 7667065<br>7                                                  | 86,518.30 | 100.00% | 6 | 7 | 12 | 0.09% | 9.18%  | ILEARPL 7.09<br>SDKGTG<br>DSSQITQ<br>VSPQR | 2,683.40 |
| Control | 6011 | PREDIC<br>TED:<br>integrin,<br>beta 3<br>(platelet<br>glycoprot<br>ein IIIa,<br>antigen<br>CD61)<br>isoform 1 | gi 7667065<br>7                                                  | 86,518.30 | 100.00% | 6 | 7 | 12 | 0.09% | 9.18%  | PLSDKG 5.55<br>TGDSSQI<br>TQVSPQ<br>R      | 2,101.05 |
| Control | 6011 | heat<br>shock<br>90kDa<br>protein 1,<br>beta                                                                  | gi 1186018<br>68,gi 34392<br>345,gi 7507<br>2499,gi 957<br>67684 | 83,238.20 | 100.00% | 8 | 8 | 12 | 0.09% | 16.90% | ADLVNN 3.6<br>LGTIAK                       | 1,228.69 |
| Control | 6011 | heat<br>shock<br>90kDa<br>protein 1,<br>beta                                                                  | gi 1186018<br>68,gi 34392<br>345,gi 7507<br>2499,gi 957<br>67684 | 83,238.20 | 100.00% | 8 | 8 | 12 | 0.09% | 16.90% | ELISNAS 3.91<br>DALDKI<br>R                | 1,544.83 |
| Control | 6011 | heat<br>shock<br>90kDa<br>protein 1,<br>beta                                                                  | gi 1186018<br>68,gi 34392<br>345,gi 7507<br>2499,gi 957<br>67684 | 83,238.20 | 100.00% | 8 | 8 | 12 | 0.09% | 16.90% | GVVDSE 4.24<br>DLPLNIS<br>R                | 1,513.79 |
| Control | 6011 | heat<br>shock<br>90kDa<br>protein 1,<br>beta                                                                  | gi 1186018<br>68,gi 34392<br>345,gi 7507<br>2499,gi 957<br>67684 | 83,238.20 | 100.00% | 8 | 8 | 12 | 0.09% | 16.90% | HLEINPD 3.96<br>HPIVETL<br>R               | 1,782.95 |
| Control | 6011 | heat<br>shock<br>90kDa<br>protein 1,<br>beta                                                                  | gi 1186018<br>68,gi 34392<br>345,gi 7507<br>2499,gi 957<br>67684 | 83,238.20 | 100.00% | 8 | 8 | 12 | 0.09% | 16.90% | HSQFIGY 3.08<br>PITLYLE<br>K               | 1,808.96 |
| Control | 6011 | heat<br>shock<br>90kDa<br>protein 1,<br>beta                                                                  | gi 1186018<br>68,gi 34392<br>345,gi 7507<br>2499,gi 957<br>67684 | 83,238.20 | 100.00% | 8 | 8 | 12 | 0.09% | 16.90% | NPDDITQ 3.34<br>EEYGEF<br>YK               | 1,847.80 |
| Control | 6011 | heat<br>shock<br>90kDa<br>protein 1,<br>beta                                                                  | gi 1186018<br>68,gi 34392<br>345,gi 7507<br>2499,gi 957<br>67684 | 83,238.20 | 100.00% | 8 | 8 | 12 | 0.09% | 16.90% | SIYYITG 2.42<br>ESK                        | 1,160.58 |
| Control | 6011 | heat<br>shock<br>90kDa<br>protein 1,<br>beta                                                                  | gi 1186018<br>68,gi 34392<br>345,gi 7507<br>2499,gi 957<br>67684 | 83,238.20 | 100.00% | 8 | 8 | 12 | 0.09% | 16.90% | TLTLVD 4.26<br>TGIGMT<br>K                 | 1,365.73 |



|         |      |                                  |                                                                                                                                     |           |         |   |   |    |       |        |                                  |      |          |
|---------|------|----------------------------------|-------------------------------------------------------------------------------------------------------------------------------------|-----------|---------|---|---|----|-------|--------|----------------------------------|------|----------|
| Control | 6011 | heat shock 90kDa protein 1, beta | gi 118601868,gi 34392345,gi 75072499,gi 95767684                                                                                    | 83,238.20 | 100.00% | 8 | 8 | 12 | 0.09% | 16.90% | YESLTD<br>PSKLDS<br>GK           | 4.04 | 1,539.75 |
| Control | 6011 | NADH dehydrogenase subunit 1     | gi 33321662,gi 70988001,gi 70988015,gi 70988029,gi 70988043,gi 70988057,gi 70988071,gi 70988085,gi 70988099,gi 70988113,gi 70988127 | 35,655.00 | 100.00% | 3 | 3 | 3  | 0.02% | 8.81%  | GPNVVG<br>PYGLLQ<br>PIADAIK      | 4.06 | 1,922.07 |
| Control | 6011 | NADH dehydrogenase subunit 1     | gi 33321662,gi 70988001,gi 70988015,gi 70988029,gi 70988043,gi 70988057,gi 70988071,gi 70988085,gi 70988099,gi 70988113,gi 70988127 | 35,655.00 | 100.00% | 3 | 3 | 3  | 0.02% | 8.81%  | KGPNVV<br>GPYGLL<br>QPIADAI<br>K | 3.63 | 2,050.17 |
| Control | 6011 | NADH dehydrogenase subunit 1     | gi 33321662,gi 70988001,gi 70988015,gi 70988029,gi 70988043,gi 70988057,gi 70988071,gi 70988085,gi 70988099,gi 70988113,gi 70988127 | 35,655.00 | 100.00% | 3 | 3 | 3  | 0.02% | 8.81%  | YALIGAL<br>R                     | 2.36 | 876.5302 |



|         |      |                                                                                                                                                                                                      |           |         |   |   |   |       |        |                             |      |          |
|---------|------|------------------------------------------------------------------------------------------------------------------------------------------------------------------------------------------------------|-----------|---------|---|---|---|-------|--------|-----------------------------|------|----------|
| Control | 6011 | RecName : gi 1141585 :<br>Full=Adipocyte, C1q and collagen domain-containing protein;<br>AltName: Full=30 kDa adipocyte complement-related protein;<br>AltName: Full=Adipocyte complement-related 30 | 26,115.60 | 100.00% | 3 | 3 | 4 | 0.03% | 15.00% | SAFSVG LER                  | 2.44 | 965.505  |
| Control | 6011 | Solute carrier family 1 (neutral amino acid transporter), member 5<br>gi 1153052 :<br>Full=Adipocyte complement-related 30                                                                           | 56,431.20 | 99.80%  | 2 | 2 | 3 | 0.02% | 4.45%  | EVLDSFL DLVR                | 3.57 | 1,305.71 |
| Control | 6011 | Solute carrier family 1 (neutral amino acid transporter), member 5<br>gi 1153052 :<br>Full=Adipocyte complement-related 30                                                                           | 56,431.20 | 99.80%  | 2 | 2 | 3 | 0.02% | 4.45%  | NIFPSNL VSAAFR              | 3.17 | 1,435.77 |
| Control | 6011 | PREDICTED: protein disulfide isomerase family A, member 6 isoform 7<br>gi 1199039 :<br>Full=Adipocyte complement-related 30                                                                          | 64,497.70 | 100.00% | 4 | 4 | 6 | 0.05% | 11.50% | ALDLFS DNAPPP ELLEIINE DVAK | 4.09 | 2,623.35 |
| Control | 6011 | PREDICTED: protein disulfide isomerase family A, member 6 isoform 7<br>gi 1199039 :<br>Full=Adipocyte complement-related 30                                                                          | 64,497.70 | 100.00% | 4 | 4 | 6 | 0.05% | 11.50% | GSFSEQ GINEFLR              | 3.58 | 1,483.72 |

|         |      |                                                                        |                                                                       |           |         |   |   |    |       |        |                                                                   |      |          |
|---------|------|------------------------------------------------------------------------|-----------------------------------------------------------------------|-----------|---------|---|---|----|-------|--------|-------------------------------------------------------------------|------|----------|
| Control | 6011 | PREDICTED: protein disulfide isomerase family A, member 6 isoform 7    | gi 119903961.gi 151553573                                             | 64,497.70 | 100.00% | 4 | 4 | 6  | 0.05% | 11.50% | GSTAPV<br>GGGAFP<br>TISTR                                         | 4.6  | 1,575.81 |
| Control | 6011 | PREDICTED: protein disulfide isomerase family A, member 6 isoform 7    | gi 119903961.gi 151553573                                             | 64,497.70 | 100.00% | 4 | 4 | 6  | 0.05% | 11.50% | TGEAIV<br>DAALSA<br>LR                                            | 2.75 | 1,386.76 |
| Control | 6011 | Deoxyribonuclease I-like 1                                             | gi 151553571                                                          | 35,175.30 | 99.80%  | 2 | 2 | 2  | 0.02% | 8.86%  | IVLHGE<br>HLQSLR                                                  | 2.51 | 1,514.88 |
| Control | 6011 | Deoxyribonuclease I-like 1                                             | gi 151553571                                                          | 35,175.30 | 99.80%  | 2 | 2 | 2  | 0.02% | 8.86%  | VLPSLVL<br>VPLHTT<br>PK                                           | 3.76 | 1,614.00 |
| Control | 6018 | TIMM23 protein                                                         | gi 134025149.gi 139947578.gi 215274655                                | 21,809.90 | 100.00% | 3 | 3 | 4  | 0.04% | 32.50% | NVQILN<br>MVTR                                                    | 3.2  | 1,203.65 |
| Control | 6018 | TIMM23 protein                                                         | gi 134025149.gi 139947578.gi 215274655                                | 21,809.90 | 100.00% | 3 | 3 | 4  | 0.04% | 32.50% | TTGGLA<br>GFFGAG<br>GAGYSH<br>ADLAGV<br>PLTGMN<br>PLSPYLN<br>VDPR | 5.36 | 4,034.97 |
| Control | 6018 | TIMM23 protein                                                         | gi 134025149.gi 139947578.gi 215274655                                | 21,809.90 | 100.00% | 3 | 3 | 4  | 0.04% | 32.50% | YLVQDT<br>DEFILPT<br>GANK                                         | 3.64 | 1,923.97 |
| Control | 6018 | similar to translationally controlled tumor protein                    | gi 28189813.gi 59858437.gi 62177164.gi 62901141.gi 74356483           | 19,564.00 | 99.80%  | 2 | 3 | 3  | 0.03% | 15.70% | DLISHDE<br>MFSDIY<br>K                                            | 2.85 | 1,728.78 |
| Control | 6018 | similar to translationally controlled tumor protein                    | gi 28189813.gi 59858437.gi 62177164.gi 62901141.gi 74356483           | 19,564.00 | 99.80%  | 2 | 3 | 3  | 0.03% | 15.70% | VKPFMT<br>GAAEQI<br>K                                             | 2.37 | 1,435.76 |
| Control | 6018 | Chain B, Subcomplex Of The Stator Of Bovine Mitochondrial Atp Synthase | gi 110591027.gi 110591030.gi 114686.gi 27807305.gi 599873.gi 74356487 | 18,544.10 | 100.00% | 3 | 4 | 10 | 0.10% | 32.50% | IQEYEKE<br>LEK                                                    | 3.62 | 1,308.67 |

|         |      |                                                                                                                                                                              |            |         |   |   |    |       |        |                                                            |          |
|---------|------|------------------------------------------------------------------------------------------------------------------------------------------------------------------------------|------------|---------|---|---|----|-------|--------|------------------------------------------------------------|----------|
| Control | 6018 | Chain B, gi 1105910<br>Subcomp 27,gi 11059<br>lex Of 1030,gi 114<br>The 686,gi 2780<br>Stator Of 7305,gi 599<br>Bovine 873,gi 7435<br>Mitochon 6487<br>drial Atp<br>Synthase | 18,544.10  | 100.00% | 3 | 4 | 10 | 0.10% | 32.50% | NIIPFDQ 3.55<br>MTIEDL<br>NEVFPE<br>TK                     | 2,509.22 |
| Control | 6018 | Chain B, gi 1105910<br>Subcomp 27,gi 11059<br>lex Of 1030,gi 114<br>The 686,gi 2780<br>Stator Of 7305,gi 599<br>Bovine 873,gi 7435<br>Mitochon 6487<br>drial Atp<br>Synthase | 18,544.10  | 100.00% | 3 | 4 | 10 | 0.10% | 32.50% | VPIPEDK 2.19<br>YTAQVD<br>AEEKED<br>VK                     | 2,403.19 |
| Control | 6018 | PREDIC gi 1946670<br>TED: 41<br>integrin,<br>alpha 5<br>(fibronect<br>in<br>receptor,<br>alpha<br>polypepti<br>de)<br>isoform 3                                              | 119,589.00 | 100.00% | 6 | 8 | 15 | 0.15% | 10.10% | AQILLDC 3.68<br>GEDNIC<br>VPDLQL<br>EVFGEQ<br>NHVYLG<br>DK | 3,687.77 |
| Control | 6018 | PREDIC gi 1946670<br>TED: 41<br>integrin,<br>alpha 5<br>(fibronect<br>in<br>receptor,<br>alpha<br>polypepti<br>de)<br>isoform 3                                              | 119,589.00 | 100.00% | 6 | 8 | 15 | 0.15% | 10.10% | DLDGNG 5.13<br>YPDLIVG<br>SFGVDK                           | 1,980.96 |
| Control | 6018 | PREDIC gi 1946670<br>TED: 41<br>integrin,<br>alpha 5<br>(fibronect<br>in<br>receptor,<br>alpha<br>polypepti<br>de)<br>isoform 3                                              | 119,589.00 | 100.00% | 6 | 8 | 15 | 0.15% | 10.10% | LAGMEP 5.39<br>TPTLTLT<br>GQDEFG<br>R                      | 2,150.04 |
| Control | 6018 | PREDIC gi 1946670<br>TED: 41<br>integrin,<br>alpha 5<br>(fibronect<br>in<br>receptor,<br>alpha<br>polypepti<br>de)<br>isoform 3                                              | 119,589.00 | 100.00% | 6 | 8 | 15 | 0.15% | 10.10% | QATLTQ 3.06<br>LLIQNG<br>AR                                | 1,627.91 |

|         |      |                                                                                  |                                                                                  |            |         |   |   |    |       |        |                               |      |          |
|---------|------|----------------------------------------------------------------------------------|----------------------------------------------------------------------------------|------------|---------|---|---|----|-------|--------|-------------------------------|------|----------|
| Control | 6018 | PREDICTED: integrin, alpha 5 (fibronectin receptor, alpha polypeptide) isoform 3 | gi 194667041                                                                     | 119,589.00 | 100.00% | 6 | 8 | 15 | 0.15% | 10.10% | TIQDFDQ ILSK                  | 2.81 | 1,339.73 |
| Control | 6018 | PREDICTED: integrin, alpha 5 (fibronectin receptor, alpha polypeptide) isoform 3 | gi 194667041                                                                     | 119,589.00 | 100.00% | 6 | 8 | 15 | 0.15% | 10.10% | VTAPPE AEYSGL VR              | 3.03 | 1,488.77 |
| Control | 6018 | caveolin-1                                                                       | gi 1840144, gi 2493547, gi 27806715, gi 38322701, gi 56181138                    | 20,577.50  | 100.00% | 2 | 3 | 12 | 0.12% | 14.00% | YVDSEGL HLYTVPI R             | 3.18 | 1,648.83 |
| Control | 6018 | caveolin-1                                                                       | gi 1840144, gi 2493547, gi 27806715, gi 38322701, gi 56181138                    | 20,577.50  | 100.00% | 2 | 3 | 12 | 0.12% | 14.00% | YVDSEGL HLYTVPI REQGNI YKPNK  | 3.97 | 2,934.47 |
| Control | 6018 | RTN3 protein                                                                     | gi 115305093, gi 122132179, gi 146231798, gi 151554368, gi 32880223, gi 38327594 | 25,478.60  | 99.80%  | 2 | 4 | 4  | 0.04% | 5.49%  | TQIDHY VGIAR                  | 2.17 | 1,272.67 |
| Control | 6018 | RTN3 protein                                                                     | gi 115305093, gi 122132179, gi 146231798, gi 151554368, gi 32880223, gi 38327594 | 25,478.60  | 99.80%  | 2 | 4 | 4  | 0.04% | 5.49%  | YKTQID HYVGIA R               | 3.19 | 1,563.83 |
| Control | 6018 | LMAN2 protein                                                                    | gi 151553875, gi 155372333                                                       | 40,385.10  | 100.00% | 4 | 6 | 8  | 0.08% | 17.00% | DNFHGL AIFLDY PNDETT ER       | 5.08 | 2,468.14 |
| Control | 6018 | LMAN2 protein                                                                    | gi 151553875, gi 155372333                                                       | 40,385.10  | 100.00% | 4 | 6 | 8  | 0.08% | 17.00% | DNVDDP TGNFR                  | 3.16 | 1,249.54 |
| Control | 6018 | LMAN2 protein                                                                    | gi 151553875, gi 155372333                                                       | 40,385.10  | 100.00% | 4 | 6 | 8  | 0.08% | 17.00% | LPTGYY FGASAG TGDLSN NHDISM K | 5.56 | 2,746.27 |
| Control | 6018 | LMAN2 protein                                                                    | gi 151553875, gi 155372333                                                       | 40,385.10  | 100.00% | 4 | 6 | 8  | 0.08% | 17.00% | SPKDNV DDPTGN FR              | 4.29 | 1,561.72 |

|         |      |                                                                                   |                                                    |            |         |    |    |    |       |        |                                           |      |          |
|---------|------|-----------------------------------------------------------------------------------|----------------------------------------------------|------------|---------|----|----|----|-------|--------|-------------------------------------------|------|----------|
| Control | 6018 | PREDICTED:<br>similar to<br>polypeptide<br>of N-acetylgalactosaminyltransferase 2 | gi 1199183<br>73                                   | 64,740.20  | 100.00% | 2  | 2  | 2  | 0.02% | 6.30%  | EILVDD<br>YSNDPE<br>DGALLG<br>K           | 3.93 | 2,176.07 |
| Control | 6018 | PREDICTED:<br>similar to<br>polypeptide<br>of N-acetylgalactosaminyltransferase 2 | gi 1199183<br>73                                   | 64,740.20  | 100.00% | 2  | 2  | 2  | 0.02% | 6.30%  | QHPYTF<br>PGGSGT<br>VFAR                  | 4.3  | 1,721.84 |
| Control | 6018 | ATPase, Na <sup>+</sup> /K <sup>+</sup> transporting, alpha 1 polypeptide         | gi 1153052<br>84,gi 11600<br>3819,gi 122<br>132194 | 112,627.60 | 100.00% | 19 | 27 | 50 | 0.49% | 24.70% | ADIGVA<br>MGIAGS<br>DVSK                  | 4.79 | 1,506.75 |
| Control | 6018 | ATPase, Na <sup>+</sup> /K <sup>+</sup> transporting, alpha 1 polypeptide         | gi 1153052<br>84,gi 11600<br>3819,gi 122<br>132194 | 112,627.60 | 100.00% | 19 | 27 | 50 | 0.49% | 24.70% | AVAGDA<br>SESALLK                         | 4.23 | 1,231.65 |
| Control | 6018 | ATPase, Na <sup>+</sup> /K <sup>+</sup> transporting, alpha 1 polypeptide         | gi 1153052<br>84,gi 11600<br>3819,gi 122<br>132194 | 112,627.60 | 100.00% | 19 | 27 | 50 | 0.49% | 24.70% | AVFQAN<br>QDNLPIL<br>K                    | 4.08 | 1,570.86 |
| Control | 6018 | ATPase, Na <sup>+</sup> /K <sup>+</sup> transporting, alpha 1 polypeptide         | gi 1153052<br>84,gi 11600<br>3819,gi 122<br>132194 | 112,627.60 | 100.00% | 19 | 27 | 50 | 0.49% | 24.70% | DKYEPA<br>AVSEHG<br>DK                    | 3.99 | 1,545.72 |
| Control | 6018 | ATPase, Na <sup>+</sup> /K <sup>+</sup> transporting, alpha 1 polypeptide         | gi 1153052<br>84,gi 11600<br>3819,gi 122<br>132194 | 112,627.60 | 100.00% | 19 | 27 | 50 | 0.49% | 24.70% | EQPLDE<br>ELKDAF<br>QNAYLE<br>LGGLGE<br>R | 3.46 | 2,834.38 |
| Control | 6018 | ATPase, Na <sup>+</sup> /K <sup>+</sup> transporting, alpha 1 polypeptide         | gi 1153052<br>84,gi 11600<br>3819,gi 122<br>132194 | 112,627.60 | 100.00% | 19 | 27 | 50 | 0.49% | 24.70% | GGDRIP<br>ADLR                            | 2.37 | 1,069.58 |
| Control | 6018 | ATPase, Na <sup>+</sup> /K <sup>+</sup> transporting, alpha 1 polypeptide         | gi 1153052<br>84,gi 11600<br>3819,gi 122<br>132194 | 112,627.60 | 100.00% | 19 | 27 | 50 | 0.49% | 24.70% | GVGIIE<br>GNETVE<br>DIAAR                 | 6.21 | 1,829.92 |

|         |      |                                                                                                    |            |         |    |    |    |       |        |                                          |          |
|---------|------|----------------------------------------------------------------------------------------------------|------------|---------|----|----|----|-------|--------|------------------------------------------|----------|
| Control | 6018 | ATPase, gi 1153052<br>Na+/K+ 84.gi 11600<br>transporti<br>ng, alpha 132194<br>1<br>polypepti<br>de | 112,627.60 | 100.00% | 19 | 27 | 50 | 0.49% | 24.70% | IVEIPFNS 2.76<br>TNK                     | 1,261.68 |
| Control | 6018 | ATPase, gi 1153052<br>Na+/K+ 84.gi 11600<br>transporti<br>ng, alpha 132194<br>1<br>polypepti<br>de | 112,627.60 | 100.00% | 19 | 27 | 50 | 0.49% | 24.70% | KADIGV 6.23<br>AMGIAG<br>SDVSK           | 1,634.84 |
| Control | 6018 | ATPase, gi 1153052<br>Na+/K+ 84.gi 11600<br>transporti<br>ng, alpha 132194<br>1<br>polypepti<br>de | 112,627.60 | 100.00% | 19 | 27 | 50 | 0.49% | 24.70% | LNIPVSQ 3.37<br>VNPR                     | 1,236.71 |
| Control | 6018 | ATPase, gi 1153052<br>Na+/K+ 84.gi 11600<br>transporti<br>ng, alpha 132194<br>1<br>polypepti<br>de | 112,627.60 | 100.00% | 19 | 27 | 50 | 0.49% | 24.70% | LSLDEL 2.39<br>HR                        | 982.5317 |
| Control | 6018 | ATPase, gi 1153052<br>Na+/K+ 84.gi 11600<br>transporti<br>ng, alpha 132194<br>1<br>polypepti<br>de | 112,627.60 | 100.00% | 19 | 27 | 50 | 0.49% | 24.70% | MSINAE 4.18<br>EVVVGD<br>LVEVK           | 1,846.95 |
| Control | 6018 | ATPase, gi 1153052<br>Na+/K+ 84.gi 11600<br>transporti<br>ng, alpha 132194<br>1<br>polypepti<br>de | 112,627.60 | 100.00% | 19 | 27 | 50 | 0.49% | 24.70% | NMVPQQ 2.56<br>ALVIR                     | 1,284.71 |
| Control | 6018 | ATPase, gi 1153052<br>Na+/K+ 84.gi 11600<br>transporti<br>ng, alpha 132194<br>1<br>polypepti<br>de | 112,627.60 | 100.00% | 19 | 27 | 50 | 0.49% | 24.70% | QAADMI 4.24<br>LLDDNF<br>ASIVTGV<br>EEGR | 2,480.20 |
| Control | 6018 | ATPase, gi 1153052<br>Na+/K+ 84.gi 11600<br>transporti<br>ng, alpha 132194<br>1<br>polypepti<br>de | 112,627.60 | 100.00% | 19 | 27 | 50 | 0.49% | 24.70% | QGAIVA 5.06<br>VTGDGV<br>NDSPAL<br>K     | 1,811.95 |
| Control | 6018 | ATPase, gi 1153052<br>Na+/K+ 84.gi 11600<br>transporti<br>ng, alpha 132194<br>1<br>polypepti<br>de | 112,627.60 | 100.00% | 19 | 27 | 50 | 0.49% | 24.70% | QGAIVA 3.2<br>VTGDGV<br>NDSPAL<br>KK     | 1,940.05 |
| Control | 6018 | ATPase, gi 1153052<br>Na+/K+ 84.gi 11600<br>transporti<br>ng, alpha 132194<br>1<br>polypepti<br>de | 112,627.60 | 100.00% | 19 | 27 | 50 | 0.49% | 24.70% | SPDFTNE 4.97<br>NPLETR                   | 1,519.70 |



|         |      |                                                  |                                                             |            |         |    |    |    |       |        |                              |      |          |
|---------|------|--------------------------------------------------|-------------------------------------------------------------|------------|---------|----|----|----|-------|--------|------------------------------|------|----------|
| Control | 6018 | ATPase, Na+/K+ transporting, alpha 1 polypeptide | gi 115305284,gi 116003819,gi 122132194                      | 112,627.60 | 100.00% | 19 | 27 | 50 | 0.49% | 24.70% | VDNSSL<br>TGESEP<br>QTR      | 4.35 | 1,619.75 |
| Control | 6018 | ATPase, Na+/K+ transporting, alpha 1 polypeptide | gi 115305284,gi 116003819,gi 122132194                      | 112,627.60 | 100.00% | 19 | 27 | 50 | 0.49% | 24.70% | VIMVTG<br>DHPITAK            | 4.44 | 1,397.75 |
| Control | 6018 | NADH dehydrogenase                               | gi 256,gi 28461255,gi 400533,gi 73587329                    | 20,946.90  | 100.00% | 4  | 4  | 4  | 0.04% | 27.80% | AFDLLV<br>DRPVTL<br>VR       | 2.09 | 1,613.94 |
| Control | 6018 | NADH dehydrogenase                               | gi 256,gi 28461255,gi 400533,gi 73587329                    | 20,946.90  | 100.00% | 4  | 4  | 4  | 0.04% | 27.80% | DYKVDQ<br>EIVNIIQ<br>R       | 4.99 | 1,861.97 |
| Control | 6018 | NADH dehydrogenase                               | gi 256,gi 28461255,gi 400533,gi 73587329                    | 20,946.90  | 100.00% | 4  | 4  | 4  | 0.04% | 27.80% | RTPAPSP<br>QTSLPNP<br>ITYLTK | 2.57 | 2,182.19 |
| Control | 6018 | NADH dehydrogenase                               | gi 256,gi 28461255,gi 400533,gi 73587329                    | 20,946.90  | 100.00% | 4  | 4  | 4  | 0.04% | 27.80% | TPAPSPQ<br>TSLPNPI<br>TYLTK  | 4.96 | 2,026.09 |
| Control | 6018 | ribosomal protein L18                            | gi 59858459,gi 62752012,gi 75060915,gi 75775560,gi 89573893 | 21,518.10  | 100.00% | 3  | 3  | 5  | 0.05% | 18.10% | ILTFDQL<br>ALDSPK            | 4.75 | 1,460.80 |
| Control | 6018 | ribosomal protein L18                            | gi 59858459,gi 62752012,gi 75060915,gi 75775560,gi 89573893 | 21,518.10  | 100.00% | 3  | 3  | 5  | 0.05% | 18.10% | TNRPPLS<br>LSR               | 3.4  | 1,140.65 |
| Control | 6018 | ribosomal protein L18                            | gi 59858459,gi 62752012,gi 75060915,gi 75775560,gi 89573893 | 21,518.10  | 100.00% | 3  | 3  | 5  | 0.05% | 18.10% | TNSTFN<br>QVVLK              | 2.57 | 1,250.67 |

|         |      |                                                                                                                                                                                                                                      |           |         |   |   |   |       |       |                         |          |
|---------|------|--------------------------------------------------------------------------------------------------------------------------------------------------------------------------------------------------------------------------------------|-----------|---------|---|---|---|-------|-------|-------------------------|----------|
| Control | 6018 | RecName gi 1098919 : 34,gi 28461 Full=Isoc itrate gi 7358732 dehydrog 3 enase [NADP], mitochon drial; Short=ID H; AltName: Full=Oxa losuccina te decarbox ylase; AltName: Full=NA DP(+)- specific ICDH; AltName: Full=IDP ; AltName: | 50,807.00 | 100.00% | 3 | 3 | 3 | 0.03% | 8.85% | LILPHVD 2.18 VQLK       | 1,274.78 |
| Control | 6018 | RecName gi 1098919 : 34,gi 28461 Full=Isoc itrate gi 7358732 dehydrog 3 enase [NADP], mitochon drial; Short=ID H; AltName: Full=Oxa losuccina te decarbox ylase; AltName: Full=NA DP(+)- specific ICDH; AltName: Full=IDP ; AltName: | 50,807.00 | 100.00% | 3 | 3 | 3 | 0.03% | 8.85% | LNEHFL 3.79 NTSDFL DTIK | 1,906.95 |

|         |      |                                                                                                                                                                                                                                                                                                   |                                                                                                                                          |           |         |   |   |       |       |                        |                                         |          |
|---------|------|---------------------------------------------------------------------------------------------------------------------------------------------------------------------------------------------------------------------------------------------------------------------------------------------------|------------------------------------------------------------------------------------------------------------------------------------------|-----------|---------|---|---|-------|-------|------------------------|-----------------------------------------|----------|
| Control | 6018 | RecName<br>: gi 1098919<br>Full=Isoc<br>itrate gi 7358732<br>dehydrog<br>enase<br>[NADP],<br>mitochon<br>drial;<br>Short=ID<br>H;<br>AltName:<br>Full=Oxa<br>losuccina<br>te<br>decarbox<br>ylase;<br>AltName:<br>Full=NA<br>DP(+)-<br>specific<br>ICDH;<br>AltName:<br>Full=IDP<br>;<br>AltName: | 50,807.00                                                                                                                                | 100.00%   | 3       | 3 | 3 | 0.03% | 8.85% | TIEAEAA 4.06<br>HGTVTR | 1,355.69                                |          |
| Control | 6018 | endotheli<br>n-<br>convertin<br>g enzyme                                                                                                                                                                                                                                                          | gi 1092971,<br>gi 1248291<br>88,gi 19035<br>9620,gi 229<br>9388,gi 229<br>9395,gi 307<br>94312,gi 53<br>5075,gi 688<br>290,gi 8976<br>02 | 85,603.70 | 100.00% | 6 | 9 | 15    | 0.15% | 10.70%                 | AFEESLS 2.92<br>TLK                     | 1,124.58 |
| Control | 6018 | endotheli<br>n-<br>convertin<br>g enzyme                                                                                                                                                                                                                                                          | gi 1092971,<br>gi 1248291<br>88,gi 19035<br>9620,gi 229<br>9388,gi 229<br>9395,gi 307<br>94312,gi 53<br>5075,gi 688<br>290,gi 8976<br>02 | 85,603.70 | 100.00% | 6 | 9 | 15    | 0.15% | 10.70%                 | ELDKVF 5.25<br>NDYTAV<br>PDLYFE<br>NAMR | 2,666.24 |
| Control | 6018 | endotheli<br>n-<br>convertin<br>g enzyme                                                                                                                                                                                                                                                          | gi 1092971,<br>gi 1248291<br>88,gi 19035<br>9620,gi 229<br>9388,gi 229<br>9395,gi 307<br>94312,gi 53<br>5075,gi 688<br>290,gi 8976<br>02 | 85,603.70 | 100.00% | 6 | 9 | 15    | 0.15% | 10.70%                 | HTLGENI 4.42<br>ADNGGL<br>K             | 1,438.73 |
| Control | 6018 | endotheli<br>n-<br>convertin<br>g enzyme                                                                                                                                                                                                                                                          | gi 1092971,<br>gi 1248291<br>88,gi 19035<br>9620,gi 229<br>9388,gi 229<br>9395,gi 307<br>94312,gi 53<br>5075,gi 688<br>290,gi 8976<br>02 | 85,603.70 | 100.00% | 6 | 9 | 15    | 0.15% | 10.70%                 | NEIVFPA 5.43<br>GILQAPF<br>YTR          | 1,936.03 |

|         |      |                                                |                                                                                                            |           |         |   |   |    |       |        |                                  |      |          |
|---------|------|------------------------------------------------|------------------------------------------------------------------------------------------------------------|-----------|---------|---|---|----|-------|--------|----------------------------------|------|----------|
| Control | 6018 | endothelin-converting enzyme                   | gi 1092971, gi 1248291, gi 190359620, gi 2299388, gi 2299395, gi 30794312, gi 535075, gi 688290, gi 897602 | 85,603.70 | 100.00% | 6 | 9 | 15 | 0.15% | 10.70% | TPESSEH<br>GLITDPH<br>SPSR       | 4.91 | 1,946.92 |
| Control | 6018 | endothelin-converting enzyme                   | gi 1092971, gi 1248291, gi 190359620, gi 2299388, gi 2299395, gi 30794312, gi 535075, gi 688290, gi 897602 | 85,603.70 | 100.00% | 6 | 9 | 15 | 0.15% | 10.70% | VFNDYT<br>AVPDLY<br>FENAMR       | 3.66 | 2,181.00 |
| Control | 6018 | RecName: Full=60S ribosomal protein L5         | gi 108862056, gi 119900687, gi 119905361, gi 61552973, gi 75775327, gi 78369655                            | 34,327.50 | 99.80%  | 2 | 2 | 2  | 0.02% | 8.75%  | GAVDGG<br>LSIPHST<br>K           | 4.05 | 1,338.70 |
| Control | 6018 | RecName: Full=60S ribosomal protein L5         | gi 108862056, gi 119900687, gi 119905361, gi 61552973, gi 75775327, gi 78369655                            | 34,327.50 | 99.80%  | 2 | 2 | 2  | 0.02% | 8.75%  | YLIEEDE<br>DAYKK                 | 3.37 | 1,515.72 |
| Control | 6018 | secretory carrier membrane protein 3 isoform 1 | gi 61553277, gi 71649517, gi 73586519, gi 78369651                                                         | 38,348.80 | 100.00% | 3 | 3 | 3  | 0.03% | 15.00% | AQQEFA<br>AGVFSN<br>PAVR         | 3.35 | 1,691.85 |
| Control | 6018 | secretory carrier membrane protein 3 isoform 1 | gi 61553277, gi 71649517, gi 73586519, gi 78369651                                                         | 38,348.80 | 100.00% | 3 | 3 | 3  | 0.03% | 15.00% | NYGSYS<br>TQASTA<br>AATAEL<br>LK | 5.73 | 2,047.00 |
| Control | 6018 | secretory carrier membrane protein 3 isoform 1 | gi 61553277, gi 71649517, gi 73586519, gi 78369651                                                         | 38,348.80 | 100.00% | 3 | 3 | 3  | 0.03% | 15.00% | TAAANA<br>AAGAAE<br>NAFR         | 3.74 | 1,476.72 |
| Control | 6018 | ANO10 protein                                  | gi 154425799, gi 156120985                                                                                 | 76,294.20 | 99.80%  | 2 | 2 | 2  | 0.02% | 3.79%  | ETLENQ<br>NLYLVG<br>ASK          | 3.25 | 1,678.86 |
| Control | 6018 | ANO10 protein                                  | gi 154425799, gi 156120985                                                                                 | 76,294.20 | 99.80%  | 2 | 2 | 2  | 0.02% | 3.79%  | LEFESLE<br>ALK                   | 3.05 | 1,178.63 |
| Control | 6018 | PRKCD BP protein                               | gi 133778193, gi 134085797, gi 187611336                                                                   | 27,468.60 | 100.00% | 5 | 7 | 11 | 0.11% | 23.10% | GHAAPT<br>PTPVKPP<br>R           | 2.9  | 1,425.80 |
| Control | 6018 | PRKCD BP protein                               | gi 133778193, gi 134085797, gi 187611336                                                                   | 27,468.60 | 100.00% | 5 | 7 | 11 | 0.11% | 23.10% | LATMLE<br>TLR                    | 2.87 | 1,063.58 |

|         |      |                                                                                   |                                                                                                                                        |           |         |    |    |     |       |        |                              |          |
|---------|------|-----------------------------------------------------------------------------------|----------------------------------------------------------------------------------------------------------------------------------------|-----------|---------|----|----|-----|-------|--------|------------------------------|----------|
| Control | 6018 | PRKCD<br>BP<br>protein                                                            | gi 1337781<br>93,gi 13408<br>5797,gi 187<br>611336                                                                                     | 27,468.60 | 100.00% | 5  | 7  | 11  | 0.11% | 23.10% | LEANHG 3.6<br>LLVAR          | 1,192.68 |
| Control | 6018 | PRKCD<br>BP<br>protein                                                            | gi 1337781<br>93,gi 13408<br>5797,gi 187<br>611336                                                                                     | 27,468.60 | 100.00% | 5  | 7  | 11  | 0.11% | 23.10% | RIQSNLG 3.43<br>ALSR         | 1,214.70 |
| Control | 6018 | PRKCD<br>BP<br>protein                                                            | gi 1337781<br>93,gi 13408<br>5797,gi 187<br>611336                                                                                     | 27,468.60 | 100.00% | 5  | 7  | 11  | 0.11% | 23.10% | SHDTTS 5.44<br>NTLAQL<br>LAK | 1,599.83 |
| Control | 6018 | PREDIC<br>TED:<br>similar to<br>Histone<br>H4<br>replacem<br>ent<br>CG3379-<br>PC | gi 1199157<br>09,gi 11991<br>5719,gi 119<br>915738,gi 7<br>6613952,gi <br>76616306,g<br>i 76631252,<br>gi 7663126<br>2,gi 766317<br>17 | 11,349.70 | 100.00% | 11 | 17 | 172 | 1.68% | 56.30% | DAVTTYT 2.69<br>EHAK         | 1,134.54 |
| Control | 6018 | PREDIC<br>TED:<br>similar to<br>Histone<br>H4<br>replacem<br>ent<br>CG3379-<br>PC | gi 1199157<br>09,gi 11991<br>5719,gi 119<br>915738,gi 7<br>6613952,gi <br>76616306,g<br>i 76631252,<br>gi 7663126<br>2,gi 766317<br>17 | 11,349.70 | 100.00% | 11 | 17 | 172 | 1.68% | 56.30% | DNIQGIT 3.61<br>KPAIR        | 1,325.75 |
| Control | 6018 | PREDIC<br>TED:<br>similar to<br>Histone<br>H4<br>replacem<br>ent<br>CG3379-<br>PC | gi 1199157<br>09,gi 11991<br>5719,gi 119<br>915738,gi 7<br>6613952,gi <br>76616306,g<br>i 76631252,<br>gi 7663126<br>2,gi 766317<br>17 | 11,349.70 | 100.00% | 11 | 17 | 172 | 1.68% | 56.30% | ISGLIYE 4.16<br>ETR          | 1,180.62 |
| Control | 6018 | PREDIC<br>TED:<br>similar to<br>Histone<br>H4<br>replacem<br>ent<br>CG3379-<br>PC | gi 1199157<br>09,gi 11991<br>5719,gi 119<br>915738,gi 7<br>6613952,gi <br>76616306,g<br>i 76631252,<br>gi 7663126<br>2,gi 766317<br>17 | 11,349.70 | 100.00% | 11 | 17 | 172 | 1.68% | 56.30% | KTVTAM 3.92<br>DVVYAL<br>K   | 1,454.79 |
| Control | 6018 | PREDIC<br>TED:<br>similar to<br>Histone<br>H4<br>replacem<br>ent<br>CG3379-<br>PC | gi 1199157<br>09,gi 11991<br>5719,gi 119<br>915738,gi 7<br>6613952,gi <br>76616306,g<br>i 76631252,<br>gi 7663126<br>2,gi 766317<br>17 | 11,349.70 | 100.00% | 11 | 17 | 172 | 1.68% | 56.30% | KTVTAM 4.7<br>DVVYAL<br>KR   | 1,610.89 |

|         |      |                                                                                                                               |                                       |           |         |    |    |     |       |        |                           |          |
|---------|------|-------------------------------------------------------------------------------------------------------------------------------|---------------------------------------|-----------|---------|----|----|-----|-------|--------|---------------------------|----------|
| Control | 6018 | PREDIC TED: 09,gi 11991 similar to 5719,gi 119 Histone 915738,gi 7 H4 6613952,gi 76616306,gi 76631252,CG3379-PC 2,gi 76631717 | gi 1199157                            | 11,349.70 | 100.00% | 11 | 17 | 172 | 1.68% | 56.30% | RISGLIY EETR 2.96         | 1,336.72 |
| Control | 6018 | PREDIC TED: 09,gi 11991 similar to 5719,gi 119 Histone 915738,gi 7 H4 6613952,gi 76616306,gi 76631252,CG3379-PC 2,gi 76631717 | gi 1199157                            | 11,349.70 | 100.00% | 11 | 17 | 172 | 1.68% | 56.30% | TVTAMD VVYALK 4.75        | 1,310.70 |
| Control | 6018 | PREDIC TED: 09,gi 11991 similar to 5719,gi 119 Histone 915738,gi 7 H4 6613952,gi 76616306,gi 76631252,CG3379-PC 2,gi 76631717 | gi 1199157                            | 11,349.70 | 100.00% | 11 | 17 | 172 | 1.68% | 56.30% | TVTAMD VVYALK R 3.63      | 1,482.80 |
| Control | 6018 | PREDIC TED: 09,gi 11991 similar to 5719,gi 119 Histone 915738,gi 7 H4 6613952,gi 76616306,gi 76631252,CG3379-PC 2,gi 76631717 | gi 1199157                            | 11,349.70 | 100.00% | 11 | 17 | 172 | 1.68% | 56.30% | VFLENVI R 3.17            | 989.5778 |
| Control | 6018 | PREDIC TED: 09,gi 11991 similar to 5719,gi 119 Histone 915738,gi 7 H4 6613952,gi 76616306,gi 76631252,CG3379-PC 2,gi 76631717 | gi 1199157                            | 11,349.70 | 100.00% | 11 | 17 | 172 | 1.68% | 56.30% | VFLENVI RDAVTY TEHAK 5.26 | 2,105.10 |
| Control | 6018 | PREDIC TED: 09,gi 11991 similar to 5719,gi 119 Histone 915738,gi 7 H4 6613952,gi 76616306,gi 76631252,CG3379-PC 2,gi 76631717 | gi 1199157                            | 11,349.70 | 100.00% | 11 | 17 | 172 | 1.68% | 56.30% | VLRDNI QGITKPA IR 4.39    | 1,694.01 |
| Control | 6018 | RecName : Full=Clefs lip and palate transmembrane protein 1 homolog                                                           | gi 110278913,gi 114051439,gi 84708720 | 75,864.60 | 99.80%  | 2  | 4  | 4   | 0.04% | 4.63%  | ALNTFID DLFAFVI K 3.9     | 1,726.94 |

|         |      |                                                                                                                                        |                         |         |    |    |    |       |        |                                               |      |          |
|---------|------|----------------------------------------------------------------------------------------------------------------------------------------|-------------------------|---------|----|----|----|-------|--------|-----------------------------------------------|------|----------|
| Control | 6018 | RecName gi 1102789 :<br>13,gi 11405<br>Full=Clef 1439,gi 847<br>t lip and 08720<br>palate<br>transmem<br>brane<br>protein 1<br>homolog | 75,864.60               | 99.80%  | 2  | 4  | 4  | 0.04% | 4.63%  | NLLTGE<br>TEADPE<br>MIKR                      | 3.92 | 1,832.91 |
| Control | 6018 | inner membran<br>e protein,<br>mitochon<br>drial                                                                                       | gi 1529412<br>83,035.60 | 100.00% | 16 | 19 | 33 | 0.32% | 29.40% | AVDEAA<br>DALLK                               | 2.52 | 1,115.59 |
| Control | 6018 | inner membran<br>e protein,<br>mitochon<br>drial                                                                                       | gi 1529412<br>83,035.60 | 100.00% | 16 | 19 | 33 | 0.32% | 29.40% | ELDSITP<br>EVLPGW<br>K                        | 4.42 | 1,583.83 |
| Control | 6018 | inner membran<br>e protein,<br>mitochon<br>drial                                                                                       | gi 1529412<br>83,035.60 | 100.00% | 16 | 19 | 33 | 0.32% | 29.40% | KVEEVR<br>DAMENE<br>MR                        | 2.62 | 1,751.81 |
| Control | 6018 | inner membran<br>e protein,<br>mitochon<br>drial                                                                                       | gi 1529412<br>83,035.60 | 100.00% | 16 | 19 | 33 | 0.32% | 29.40% | LAEQEL<br>QFR                                 | 3.02 | 1,133.60 |
| Control | 6018 | inner membran<br>e protein,<br>mitochon<br>drial                                                                                       | gi 1529412<br>83,035.60 | 100.00% | 16 | 19 | 33 | 0.32% | 29.40% | LSADDL<br>NALIAH<br>AHR                       | 2.57 | 1,616.85 |
| Control | 6018 | inner membran<br>e protein,<br>mitochon<br>drial                                                                                       | gi 1529412<br>83,035.60 | 100.00% | 16 | 19 | 33 | 0.32% | 29.40% | LSQEQV<br>DNFTLDI<br>NTAYAR                   | 5.05 | 2,198.07 |
| Control | 6018 | inner membran<br>e protein,<br>mitochon<br>drial                                                                                       | gi 1529412<br>83,035.60 | 100.00% | 16 | 19 | 33 | 0.32% | 29.40% | MKTASA<br>DLPTVPL<br>GSAVEAI<br>R             | 3    | 2,143.14 |
| Control | 6018 | inner membran<br>e protein,<br>mitochon<br>drial                                                                                       | gi 1529412<br>83,035.60 | 100.00% | 16 | 19 | 33 | 0.32% | 29.40% | QHIALAL<br>EK                                 | 3.93 | 1,022.60 |
| Control | 6018 | inner membran<br>e protein,<br>mitochon<br>drial                                                                                       | gi 1529412<br>83,035.60 | 100.00% | 16 | 19 | 33 | 0.32% | 29.40% | QKGDTS<br>ASTTAG<br>DTLSVP<br>APVVQH<br>EELIK | 3.76 | 2,979.53 |
| Control | 6018 | inner membran<br>e protein,<br>mitochon<br>drial                                                                                       | gi 1529412<br>83,035.60 | 100.00% | 16 | 19 | 33 | 0.32% | 29.40% | TASADL<br>PTVPLGS<br>AVEAIR                   | 5.24 | 1,868.01 |
| Control | 6018 | inner membran<br>e protein,<br>mitochon<br>drial                                                                                       | gi 1529412<br>83,035.60 | 100.00% | 16 | 19 | 33 | 0.32% | 29.40% | TDHPET<br>GEGKPK<br>PATSEEA<br>SSTSVR         | 4.51 | 2,598.23 |
| Control | 6018 | inner membran<br>e protein,<br>mitochon<br>drial                                                                                       | gi 1529412<br>83,035.60 | 100.00% | 16 | 19 | 33 | 0.32% | 29.40% | TIPYSDK<br>LFEMVL<br>GSPPYT<br>VPLPK          | 3.53 | 2,708.43 |

|         |      |                                              |                                                             |           |         |    |    |    |       |        |                            |      |          |
|---------|------|----------------------------------------------|-------------------------------------------------------------|-----------|---------|----|----|----|-------|--------|----------------------------|------|----------|
| Control | 6018 | inner membrane protein, mitochondrial        | gi 152941206                                                | 83,035.60 | 100.00% | 16 | 19 | 33 | 0.32% | 29.40% | VQEQL KYEFL DLSEK          | 3.42 | 2,142.02 |
| Control | 6018 | inner membrane protein, mitochondrial        | gi 152941206                                                | 83,035.60 | 100.00% | 16 | 19 | 33 | 0.32% | 29.40% | VQEQL KYEFL DLSEKL AEQLQFR | 3.61 | 3,256.60 |
| Control | 6018 | inner membrane protein, mitochondrial        | gi 152941206                                                | 83,035.60 | 100.00% | 16 | 19 | 33 | 0.32% | 29.40% | VVSQYH ELVVQAR             | 4.48 | 1,527.83 |
| Control | 6018 | inner membrane protein, mitochondrial        | gi 152941206                                                | 83,035.60 | 100.00% | 16 | 19 | 33 | 0.32% | 29.40% | YEFQL LSEKLA EQLQFR        | 3.57 | 2,402.15 |
| Control | 6018 | ATAD1 protein                                | gi 154426126,gi 76671592                                    | 41,750.40 | 99.80%  | 2  | 4  | 4  | 0.04% | 11.40% | EYVNST SEESHDEEIRPVQQDLHR  | 4    | 3,140.42 |
| Control | 6018 | ATAD1 protein                                | gi 154426126,gi 76671592                                    | 41,750.40 | 99.80%  | 2  | 4  | 4  | 0.04% | 11.40% | LQPSIIFIDEIDSFLR           | 3.88 | 1,906.03 |
| Control | 6018 | Mitochondrial carrier homolog 2 (C. elegans) | gi 151554706,gi 28603744,gi 59858227,gi 67461083,gi 7959093 | 33,276.60 | 100.00% | 3  | 4  | 6  | 0.06% | 13.50% | GLFTGLTPR                  | 2.23 | 961.5467 |
| Control | 6018 | Mitochondrial carrier homolog 2 (C. elegans) | gi 151554706,gi 28603744,gi 59858227,gi 67461083,gi 7959093 | 33,276.60 | 100.00% | 3  | 4  | 6  | 0.06% | 13.50% | SAATLITHPFHVITLR           | 1.72 | 1,777.01 |
| Control | 6018 | Mitochondrial carrier homolog 2 (C. elegans) | gi 151554706,gi 28603744,gi 59858227,gi 67461083,gi 7959093 | 33,276.60 | 100.00% | 3  | 4  | 6  | 0.06% | 13.50% | VLIQVGYEPLAPT VGR          | 3.82 | 1,711.97 |
| Control | 6018 | PREDICTED: similar to cytoskeletal protein 4 | gi 119892686                                                | 64,511.50 | 100.00% | 27 | 40 | 92 | 0.90% | 45.20% | AAALRP EEDGAF RPSEAFETLQK  | 3.47 | 2,533.27 |
| Control | 6018 | PREDICTED: similar to cytoskeletal protein 4 | gi 119892686                                                | 64,511.50 | 100.00% | 27 | 40 | 92 | 0.90% | 45.20% | AEESAAHLPEEIR              | 3.42 | 1,451.71 |
| Control | 6018 | PREDICTED: similar to cytoskeletal protein 4 | gi 119892686                                                | 64,511.50 | 100.00% | 27 | 40 | 92 | 0.90% | 45.20% | AEESAAHLPEEIR              | 2.45 | 1,607.81 |



|         |      |                                                                                  |                  |           |         |    |    |    |       |        |                            |      |          |
|---------|------|----------------------------------------------------------------------------------|------------------|-----------|---------|----|----|----|-------|--------|----------------------------|------|----------|
| Control | 6018 | PREDIC<br>TED:<br>similar to<br>cytoskele<br>ton-<br>associate<br>d protein<br>4 | gi 1198926<br>86 | 64,511.50 | 100.00% | 27 | 40 | 92 | 0.90% | 45.20% | ASVGQV<br>ESDLK            | 3.72 | 1,132.58 |
| Control | 6018 | PREDIC<br>TED:<br>similar to<br>cytoskele<br>ton-<br>associate<br>d protein<br>4 | gi 1198926<br>86 | 64,511.50 | 100.00% | 27 | 40 | 92 | 0.90% | 45.20% | DLSDGIH<br>VVK             | 2.94 | 1,082.58 |
| Control | 6018 | PREDIC<br>TED:<br>similar to<br>cytoskele<br>ton-<br>associate<br>d protein<br>4 | gi 1198926<br>86 | 64,511.50 | 100.00% | 27 | 40 | 92 | 0.90% | 45.20% | EAADSE<br>HHTLQA<br>LTEK   | 2.06 | 1,779.85 |
| Control | 6018 | PREDIC<br>TED:<br>similar to<br>cytoskele<br>ton-<br>associate<br>d protein<br>4 | gi 1198926<br>86 | 64,511.50 | 100.00% | 27 | 40 | 92 | 0.90% | 45.20% | EELQGG<br>LQGVEQ<br>K      | 3.75 | 1,414.72 |
| Control | 6018 | PREDIC<br>TED:<br>similar to<br>cytoskele<br>ton-<br>associate<br>d protein<br>4 | gi 1198926<br>86 | 64,511.50 | 100.00% | 27 | 40 | 92 | 0.90% | 45.20% | ELVSLK<br>QEQQR            | 2.26 | 1,357.74 |
| Control | 6018 | PREDIC<br>TED:<br>similar to<br>cytoskele<br>ton-<br>associate<br>d protein<br>4 | gi 1198926<br>86 | 64,511.50 | 100.00% | 27 | 40 | 92 | 0.90% | 45.20% | ERDFTSL<br>ENTVEE<br>R     | 4.58 | 1,724.81 |
| Control | 6018 | PREDIC<br>TED:<br>similar to<br>cytoskele<br>ton-<br>associate<br>d protein<br>4 | gi 1198926<br>86 | 64,511.50 | 100.00% | 27 | 40 | 92 | 0.90% | 45.20% | EVVKEI<br>QTSVK            | 3.42 | 1,259.72 |
| Control | 6018 | PREDIC<br>TED:<br>similar to<br>cytoskele<br>ton-<br>associate<br>d protein<br>4 | gi 1198926<br>86 | 64,511.50 | 100.00% | 27 | 40 | 92 | 0.90% | 45.20% | FKEAAD<br>SEHHTL<br>QALTEK | 4.1  | 2,055.01 |

|         |      |                                                                                  |                  |           |         |    |    |    |       |        |                            |      |          |
|---------|------|----------------------------------------------------------------------------------|------------------|-----------|---------|----|----|----|-------|--------|----------------------------|------|----------|
| Control | 6018 | PREDIC<br>TED:<br>similar to<br>cytoskele<br>ton-<br>associate<br>d protein<br>4 | gi 1198926<br>86 | 64,511.50 | 100.00% | 27 | 40 | 92 | 0.90% | 45.20% | GLGEAQ<br>LSLAGD<br>VDELK  | 5.08 | 1,714.89 |
| Control | 6018 | PREDIC<br>TED:<br>similar to<br>cytoskele<br>ton-<br>associate<br>d protein<br>4 | gi 1198926<br>86 | 64,511.50 | 100.00% | 27 | 40 | 92 | 0.90% | 45.20% | GLGEAQ<br>LSLAGD<br>VDELKR | 4.62 | 1,870.99 |
| Control | 6018 | PREDIC<br>TED:<br>similar to<br>cytoskele<br>ton-<br>associate<br>d protein<br>4 | gi 1198926<br>86 | 64,511.50 | 100.00% | 27 | 40 | 92 | 0.90% | 45.20% | GLLEDL<br>RNDLDR           | 2.43 | 1,428.74 |
| Control | 6018 | PREDIC<br>TED:<br>similar to<br>cytoskele<br>ton-<br>associate<br>d protein<br>4 | gi 1198926<br>86 | 64,511.50 | 100.00% | 27 | 40 | 92 | 0.90% | 45.20% | IETNENN<br>LESAK           | 3.52 | 1,361.65 |
| Control | 6018 | PREDIC<br>TED:<br>similar to<br>cytoskele<br>ton-<br>associate<br>d protein<br>4 | gi 1198926<br>86 | 64,511.50 | 100.00% | 27 | 40 | 92 | 0.90% | 45.20% | LEEELG<br>QLK              | 3.2  | 1,058.57 |
| Control | 6018 | PREDIC<br>TED:<br>similar to<br>cytoskele<br>ton-<br>associate<br>d protein<br>4 | gi 1198926<br>86 | 64,511.50 | 100.00% | 27 | 40 | 92 | 0.90% | 45.20% | LQNEILK<br>DLSDGIH<br>VVK  | 5.04 | 1,921.08 |
| Control | 6018 | PREDIC<br>TED:<br>similar to<br>cytoskele<br>ton-<br>associate<br>d protein<br>4 | gi 1198926<br>86 | 64,511.50 | 100.00% | 27 | 40 | 92 | 0.90% | 45.20% | LQSVED<br>GVQAAR           | 4.12 | 1,272.65 |
| Control | 6018 | PREDIC<br>TED:<br>similar to<br>cytoskele<br>ton-<br>associate<br>d protein<br>4 | gi 1198926<br>86 | 64,511.50 | 100.00% | 27 | 40 | 92 | 0.90% | 45.20% | QREELG<br>QGLQGV<br>EQK    | 5.32 | 1,698.88 |

|         |      |                                                          |                           |           |         |    |    |    |       |        |                                                 |      |          |
|---------|------|----------------------------------------------------------|---------------------------|-----------|---------|----|----|----|-------|--------|-------------------------------------------------|------|----------|
| Control | 6018 | PREDIC TED: similar to cytoskeleton-associated protein 4 | gi 119892686              | 64,511.50 | 100.00% | 27 | 40 | 92 | 0.90% | 45.20% | QREELG<br>QGLQGV<br>EQKVQS<br>LQATFG<br>TFESLVR | 3.73 | 3,462.80 |
| Control | 6018 | PREDIC TED: similar to cytoskeleton-associated protein 4 | gi 119892686              | 64,511.50 | 100.00% | 27 | 40 | 92 | 0.90% | 45.20% | RLEEEL<br>GQLK                                  | 3.52 | 1,214.67 |
| Control | 6018 | PREDIC TED: similar to cytoskeleton-associated protein 4 | gi 119892686              | 64,511.50 | 100.00% | 27 | 40 | 92 | 0.90% | 45.20% | SINDNIAI<br>FTDVQK                              | 4.83 | 1,577.82 |
| Control | 6018 | PREDIC TED: similar to cytoskeleton-associated protein 4 | gi 119892686              | 64,511.50 | 100.00% | 27 | 40 | 92 | 0.90% | 45.20% | SINDNIAI<br>FTDVQK<br>R                         | 4.05 | 1,733.92 |
| Control | 6018 | PREDIC TED: similar to cytoskeleton-associated protein 4 | gi 119892686              | 64,511.50 | 100.00% | 27 | 40 | 92 | 0.90% | 45.20% | STIQTME<br>SDVYTE<br>VK                         | 3.58 | 1,746.81 |
| Control | 6018 | PREDIC TED: similar to cytoskeleton-associated protein 4 | gi 119892686              | 64,511.50 | 100.00% | 27 | 40 | 92 | 0.90% | 45.20% | TAVDSL<br>VAYSVK                                | 3.59 | 1,252.68 |
| Control | 6018 | PREDIC TED: similar to cytoskeleton-associated protein 4 | gi 119892686              | 64,511.50 | 100.00% | 27 | 40 | 92 | 0.90% | 45.20% | VQEQVH<br>TLLGR                                 | 4.07 | 1,279.71 |
| Control | 6018 | PREDIC TED: similar to cytoskeleton-associated protein 4 | gi 119892686              | 64,511.50 | 100.00% | 27 | 40 | 92 | 0.90% | 45.20% | VQSLQA<br>TFGTFES<br>LVR                        | 4.07 | 1,782.94 |
| Control | 6018 | TMED7 protein                                            | gi 134025246,gi 157428116 | 25,318.00 | 100.00% | 6  | 7  | 9  | 0.09% | 24.90% | KQYDSY<br>TFTASK                                | 3.41 | 1,438.68 |
| Control | 6018 | TMED7 protein                                            | gi 134025246,gi 157428116 | 25,318.00 | 100.00% | 6  | 7  | 9  | 0.09% | 24.90% | LEDPDG<br>NVLYK                                 | 3.27 | 1,262.63 |

|         |      |                                                       |                                                                        |           |         |    |    |    |       |        |                                                  |          |
|---------|------|-------------------------------------------------------|------------------------------------------------------------------------|-----------|---------|----|----|----|-------|--------|--------------------------------------------------|----------|
| Control | 6018 | TMED7 protein                                         | gi 134025246,gi 157428116                                              | 25,318.00 | 100.00% | 6  | 7  | 9  | 0.09% | 24.90% | LEDPDG 2.5<br>NVLYKE<br>MKK                      | 1,794.89 |
| Control | 6018 | TMED7 protein                                         | gi 134025246,gi 157428116                                              | 25,318.00 | 100.00% | 6  | 7  | 9  | 0.09% | 24.90% | QYDSYT 2.12<br>FTASK                             | 1,310.59 |
| Control | 6018 | TMED7 protein                                         | gi 134025246,gi 157428116                                              | 25,318.00 | 100.00% | 6  | 7  | 9  | 0.09% | 24.90% | SVIDYQT 3<br>HFR                                 | 1,265.63 |
| Control | 6018 | TMED7 protein                                         | gi 134025246,gi 157428116                                              | 25,318.00 | 100.00% | 6  | 7  | 9  | 0.09% | 24.90% | TVYFDF 3.36<br>QVGEDP<br>PLFPSEN<br>R            | 2,357.11 |
| Control | 6018 | similar to peptidylprolyl isomerase A (cyclophilin A) | gi 28189771,gi 58760424,gi 75948300                                    | 17,851.80 | 100.00% | 3  | 4  | 4  | 0.04% | 16.50% | SIYGEKF 4.09<br>DDENFIL<br>K                     | 1,817.90 |
| Control | 6018 | similar to peptidylprolyl isomerase A (cyclophilin A) | gi 28189771,gi 58760424,gi 75948300                                    | 17,851.80 | 100.00% | 3  | 4  | 4  | 0.04% | 16.50% | VSFELFA 2.71<br>DK                               | 1,055.54 |
| Control | 6018 | similar to peptidylprolyl isomerase A (cyclophilin A) | gi 28189771,gi 58760424,gi 75948300                                    | 17,851.80 | 100.00% | 3  | 4  | 4  | 0.04% | 16.50% | VSFELFA 2.77<br>DKVPK                            | 1,379.76 |
| Control | 6018 | Clusterin                                             | gi 109939936,gi 116530,gi 146231734,gi 151555910,gi 163115,gi 27806907 | 51,096.70 | 100.00% | 2  | 2  | 2  | 0.02% | 9.79%  | LFNSFPI 3.86<br>TVTVPQ<br>EVSSPNF<br>MENVAE<br>K | 3,040.50 |
| Control | 6018 | Clusterin                                             | gi 109939936,gi 116530,gi 146231734,gi 151555910,gi 163115,gi 27806907 | 51,096.70 | 100.00% | 2  | 2  | 2  | 0.02% | 9.79%  | RPQDTQ 3.35<br>YYSPFSS<br>FPR                    | 1,975.93 |
| Control | 6018 | Prohibitin                                            | gi 74354527,gi 77736091,gi 88909243                                    | 29,786.60 | 100.00% | 11 | 14 | 34 | 0.33% | 55.90% | AAELIAN 5.27<br>SLATAG<br>DGLIELR                | 1,998.09 |
| Control | 6018 | Prohibitin                                            | gi 74354527,gi 77736091,gi 88909243                                    | 29,786.60 | 100.00% | 11 | 14 | 34 | 0.33% | 55.90% | AATFGLI 2.9<br>LDDVSL<br>THLTFG<br>K             | 2,119.14 |
| Control | 6018 | Prohibitin                                            | gi 74354527,gi 77736091,gi 88909243                                    | 29,786.60 | 100.00% | 11 | 14 | 34 | 0.33% | 55.90% | DLQNVN 3.96<br>ITLR                              | 1,185.66 |
| Control | 6018 | Prohibitin                                            | gi 74354527,gi 77736091,gi 88909243                                    | 29,786.60 | 100.00% | 11 | 14 | 34 | 0.33% | 55.90% | FDAGELI 4.02<br>TQR                              | 1,149.59 |

|         |      |                                                                   |                                                                                                                                                                                           |           |         |    |    |    |       |        |                                      |      |          |
|---------|------|-------------------------------------------------------------------|-------------------------------------------------------------------------------------------------------------------------------------------------------------------------------------------|-----------|---------|----|----|----|-------|--------|--------------------------------------|------|----------|
| Control | 6018 | Prohibiti<br>n                                                    | gi 7435452<br>7,gi 777360<br>91,gi 88909<br>243                                                                                                                                           | 29,786.60 | 100.00% | 11 | 14 | 34 | 0.33% | 55.90% | FGLALA<br>VAGGVV<br>NSALYN<br>VDAGHR | 4.11 | 2,371.25 |
| Control | 6018 | Prohibiti<br>n                                                    | gi 7435452<br>7,gi 777360<br>91,gi 88909<br>243                                                                                                                                           | 29,786.60 | 100.00% | 11 | 14 | 34 | 0.33% | 55.90% | IFTSIGE<br>DYDER                     | 3.63 | 1,444.66 |
| Control | 6018 | Prohibiti<br>n                                                    | gi 7435452<br>7,gi 777360<br>91,gi 88909<br>243                                                                                                                                           | 29,786.60 | 100.00% | 11 | 14 | 34 | 0.33% | 55.90% | ILFRPVA<br>SQLPR                     | 2.25 | 1,396.84 |
| Control | 6018 | Prohibiti<br>n                                                    | gi 7435452<br>7,gi 777360<br>91,gi 88909<br>243                                                                                                                                           | 29,786.60 | 100.00% | 11 | 14 | 34 | 0.33% | 55.90% | KLEAAE<br>DIAYQLS<br>R               | 4.25 | 1,606.84 |
| Control | 6018 | Prohibiti<br>n                                                    | gi 7435452<br>7,gi 777360<br>91,gi 88909<br>243                                                                                                                                           | 29,786.60 | 100.00% | 11 | 14 | 34 | 0.33% | 55.90% | NITYLPA<br>GQSVLL<br>QLPQ            | 4.7  | 1,855.03 |
| Control | 6018 | Prohibiti<br>n                                                    | gi 7435452<br>7,gi 777360<br>91,gi 88909<br>243                                                                                                                                           | 29,786.60 | 100.00% | 11 | 14 | 34 | 0.33% | 55.90% | SRNITYL<br>PAGQSV<br>LLQLPQ          | 4.96 | 2,098.17 |
| Control | 6018 | Prohibiti<br>n                                                    | gi 7435452<br>7,gi 777360<br>91,gi 88909<br>243                                                                                                                                           | 29,786.60 | 100.00% | 11 | 14 | 34 | 0.33% | 55.90% | VLPSITT<br>EILK                      | 2.4  | 1,213.74 |
| Control | 6018 | ras-<br>related<br>C3<br>botulinu<br>m toxin<br>substrate<br>1    | gi 2780644<br>3,gi 517027<br>85,gi 60070<br>14,gi 73587<br>375                                                                                                                            | 21,432.60 | 99.90%  | 2  | 3  | 3  | 0.03% | 7.81%  | KLTPITY<br>PQGLAM<br>AK              | 2.71 | 1,647.91 |
| Control | 6018 | ras-<br>related<br>C3<br>botulinu<br>m toxin<br>substrate<br>1    | gi 2780644<br>3,gi 517027<br>85,gi 60070<br>14,gi 73587<br>375                                                                                                                            | 21,432.60 | 99.90%  | 2  | 3  | 3  | 0.03% | 7.81%  | LTPITYP<br>QGLAMA<br>K               | 3.38 | 1,519.82 |
| Control | 6018 | Interferon<br>induced<br>transmem<br>brane<br>protein 1<br>(9-27) | gi 1123624<br>18,gi 11815<br>1192,gi 118<br>151350,gi 1<br>18151354,gi <br>11991951<br>3,gi 142795<br>76,gi 14279<br>578,gi 1487<br>44152,gi 32<br>480628,gi 7<br>3586549,gi <br>73587371 | 13,629.20 | 99.80%  | 2  | 3  | 5  | 0.05% | 13.70% | KMVGDI<br>TGAQSY<br>ASTAK            | 5.09 | 1,743.86 |

|         |      |                                                         |                                                                                                                                          |           |         |   |   |   |       |        |                                  |      |          |
|---------|------|---------------------------------------------------------|------------------------------------------------------------------------------------------------------------------------------------------|-----------|---------|---|---|---|-------|--------|----------------------------------|------|----------|
| Control | 6018 | Interferon induced transmembrane protein 1 (9-27)       | gi 112362418,gi 118151192,gi 118151350,gi 18151354,gi 119919513,gi 14279576,gi 14279578,gi 148744152,gi 32480628,gi 73586549,gi 73587371 | 13,629.20 | 99.80%  | 2 | 3 | 5 | 0.05% | 13.70% | MVGDIT<br>GAQSYA<br>STAK         | 5.59 | 1,615.76 |
| Control | 6018 | RecName :<br>Full=Histone H1.1;<br>AltName: Full=CT L-1 | gi 121903                                                                                                                                | 10,347.40 | 100.00% | 5 | 5 | 7 | 0.07% | 42.30% | ALAAAG<br>YDVEK                  | 3.09 | 1,107.57 |
| Control | 6018 | RecName :<br>Full=Histone H1.1;<br>AltName: Full=CT L-1 | gi 121903                                                                                                                                | 10,347.40 | 100.00% | 5 | 5 | 7 | 0.07% | 42.30% | ALAAAG<br>YDVEKN<br>NSR          | 4.15 | 1,578.79 |
| Control | 6018 | RecName :<br>Full=Histone H1.1;<br>AltName: Full=CT L-1 | gi 121903                                                                                                                                | 10,347.40 | 100.00% | 5 | 5 | 7 | 0.07% | 42.30% | ASGPPV<br>SELITK                 | 2.68 | 1,198.67 |
| Control | 6018 | RecName :<br>Full=Histone H1.1;<br>AltName: Full=CT L-1 | gi 121903                                                                                                                                | 10,347.40 | 100.00% | 5 | 5 | 7 | 0.07% | 42.30% | KALAAA<br>GYDVEK                 | 2.62 | 1,235.66 |
| Control | 6018 | RecName :<br>Full=Histone H1.1;<br>AltName: Full=CT L-1 | gi 121903                                                                                                                                | 10,347.40 | 100.00% | 5 | 5 | 7 | 0.07% | 42.30% | SETAPA<br>APAAAP<br>PAEK         | 3.1  | 1,478.75 |
| Control | 6018 | GNAS complex locus                                      | gi 113912207,gi 74268384                                                                                                                 | 45,691.40 | 99.90%  | 2 | 2 | 2 | 0.02% | 11.90% | ILHVNGF<br>NGEGGE<br>EDPQAA<br>R | 4.03 | 2,110.00 |
| Control | 6018 | GNAS complex locus                                      | gi 113912207,gi 74268384                                                                                                                 | 45,691.40 | 99.90%  | 2 | 2 | 2 | 0.02% | 11.90% | LLLLGA<br>GESGK                  | 3.36 | 1,057.63 |
| Control | 6018 | GNAS complex locus                                      | gi 113912207,gi 74268384                                                                                                                 | 45,691.40 | 99.90%  | 2 | 2 | 2 | 0.02% | 11.90% | YTTPED<br>ATPEPG<br>EDPR         | 2.94 | 1,774.78 |

|         |      |                                                                                                       |                                                              |           |         |   |   |   |       |        |                                                |      |          |
|---------|------|-------------------------------------------------------------------------------------------------------|--------------------------------------------------------------|-----------|---------|---|---|---|-------|--------|------------------------------------------------|------|----------|
| Control | 6018 | PREDICTED:<br>similar to<br>Transmembrane 9<br>superfamily<br>member 2<br>precursor (p76),<br>partial | gi 194671915                                                 | 72,962.00 | 100.00% | 3 | 4 | 5 | 0.05% | 4.40%  | IYYHVV<br>ETGSMG<br>AR                         | 4.3  | 1,598.76 |
| Control | 6018 | PREDICTED:<br>similar to<br>Transmembrane 9<br>superfamily<br>member 2<br>precursor (p76),<br>partial | gi 194671915                                                 | 72,962.00 | 100.00% | 3 | 4 | 5 | 0.05% | 4.40%  | PSENLG<br>QVLFGE<br>R                          | 3.96 | 1,445.74 |
| Control | 6018 | PREDICTED:<br>similar to<br>Transmembrane 9<br>superfamily<br>member 2<br>precursor (p76),<br>partial | gi 194671915                                                 | 72,962.00 | 100.00% | 3 | 4 | 5 | 0.05% | 4.40%  | RPSENL<br>GQVLFGE<br>R                         | 3.82 | 1,601.84 |
| Control | 6018 | interferon stimulated<br>gene 17 83<br>[Ovis aries]                                                   | gi 12082402,gi 57619183                                      | 17,482.10 | 99.80%  | 2 | 2 | 2 | 0.02% | 17.20% | EVLQEG<br>VPLVHQ<br>GLK                        | 4.36 | 1,645.93 |
| Control | 6018 | interferon stimulated<br>gene 17 83<br>[Ovis aries]                                                   | gi 12082402,gi 57619183                                      | 17,482.10 | 99.80%  | 2 | 2 | 2 | 0.02% | 17.20% | MLGGEE<br>ILVPLR                               | 2.66 | 1,342.74 |
| Control | 6018 | UPF0404 protein<br>C11orf59 homolog                                                                   | gi 122140364,gi 74267677,gi 77736483                         | 17,713.10 | 99.80%  | 2 | 2 | 2 | 0.02% | 26.70% | LPPLPSL<br>TSQPHQ<br>VLASEP<br>VPFSDL<br>QQVSR | 4.91 | 3,267.74 |
| Control | 6018 | UPF0404 protein<br>C11orf59 homolog                                                                   | gi 122140364,gi 74267677,gi 77736483                         | 17,713.10 | 99.80%  | 2 | 2 | 2 | 0.02% | 26.70% | TDEQAL<br>LSSILAK                              | 3.69 | 1,388.76 |
| Control | 6018 | RPL12 protein                                                                                         | gi 148744191,gi 42564206,gi 45430019,gi 47117092,gi 74354972 | 17,801.10 | 99.80%  | 2 | 2 | 2 | 0.02% | 18.80% | HSGNITF<br>DEIVNIA<br>R                        | 4.1  | 1,685.86 |
| Control | 6018 | RPL12 protein                                                                                         | gi 148744191,gi 42564206,gi 45430019,gi 47117092,gi 74354972 | 17,801.10 | 99.80%  | 2 | 2 | 2 | 0.02% | 18.80% | QAQIEV<br>VPSASA<br>LIK                        | 3.59 | 1,666.97 |

|         |      |                                                                        |                                        |            |         |    |    |    |       |        |                                                |      |          |
|---------|------|------------------------------------------------------------------------|----------------------------------------|------------|---------|----|----|----|-------|--------|------------------------------------------------|------|----------|
| Control | 6018 | Nucleobindin 2                                                         | gi 113912161.gi 115496067              | 49,171.70  | 99.80%  | 2  | 2  | 2  | 0.02% | 8.19%  | LHDVNS<br>DGFLDE<br>QELEALF<br>TK              | 4.87 | 2,420.16 |
| Control | 6018 | Nucleobindin 2                                                         | gi 113912161.gi 115496067              | 49,171.70  | 99.80%  | 2  | 2  | 2  | 0.02% | 8.19%  | QVIDVL<br>ETDSHF<br>R                          | 3.06 | 1,558.79 |
| Control | 6018 | VAMP (vesicle-associated membrane protein)-associated protein A, 33kDa | gi 111304648.gi 115496338.gi 121957506 | 27,838.90  | 99.80%  | 2  | 4  | 7  | 0.07% | 11.20% | FKGPFT<br>DVVTTN<br>LK                         | 4.15 | 1,566.85 |
| Control | 6018 | VAMP (vesicle-associated membrane protein)-associated protein A, 33kDa | gi 111304648.gi 115496338.gi 121957506 | 27,838.90  | 99.80%  | 2  | 4  | 7  | 0.07% | 11.20% | GPFTDV<br>VTTNLK                               | 4.12 | 1,291.69 |
| Control | 6018 | VAMP (vesicle-associated membrane protein)-associated protein A, 33kDa | gi 111304648.gi 115496338.gi 121957506 | 27,838.90  | 99.80%  | 2  | 4  | 7  | 0.07% | 11.20% | HEQILVL<br>DPPTDL<br>K                         | 3.6  | 1,617.89 |
| Control | 6018 | RecName : Full=Cate nin alpha-1                                        | gi 114149256.gi 75773615.gi 78369272   | 100,117.00 | 100.00% | 12 | 12 | 14 | 0.14% | 23.60% | AEVQNL<br>GGELVV<br>SGVDSA<br>MSLIQA<br>AK     | 4.6  | 2,602.34 |
| Control | 6018 | RecName : Full=Cate nin alpha-1                                        | gi 114149256.gi 75773615.gi 78369272   | 100,117.00 | 100.00% | 12 | 12 | 14 | 0.14% | 23.60% | AIMAQL<br>PQEQL                                | 2.97 | 1,272.66 |
| Control | 6018 | RecName : Full=Cate nin alpha-1                                        | gi 114149256.gi 75773615.gi 78369272   | 100,117.00 | 100.00% | 12 | 12 | 14 | 0.14% | 23.60% | ALKPEV<br>DKLNIM<br>AAK                        | 2.61 | 1,656.94 |
| Control | 6018 | RecName : Full=Cate nin alpha-1                                        | gi 114149256.gi 75773615.gi 78369272   | 100,117.00 | 100.00% | 12 | 12 | 14 | 0.14% | 23.60% | ESQFLKE<br>ELVAAY<br>EDVRK                     | 4.56 | 2,090.11 |
| Control | 6018 | RecName : Full=Cate nin alpha-1                                        | gi 114149256.gi 75773615.gi 78369272   | 100,117.00 | 100.00% | 12 | 12 | 14 | 0.14% | 23.60% | FTEQVE<br>AAVEAL<br>SSDPAQ<br>PMDENE<br>FIDASR | 3.25 | 3,312.49 |



|         |      |                                                                                                                                            |                                                        |         |    |    |    |       |        |                                                    |          |
|---------|------|--------------------------------------------------------------------------------------------------------------------------------------------|--------------------------------------------------------|---------|----|----|----|-------|--------|----------------------------------------------------|----------|
| Control | 6018 | RecName gi 1141492 : 56,gi 75773 Full=Cate 615,gi 7836 nin alpha- 9272 1                                                                   | 100,117.00                                             | 100.00% | 12 | 12 | 14 | 0.14% | 23.60% | HVNPVQ 3.02<br>ALSEFK                              | 1,368.73 |
| Control | 6018 | RecName gi 1141492 : 56,gi 75773 Full=Cate 615,gi 7836 nin alpha- 9272 1                                                                   | 100,117.00                                             | 100.00% | 12 | 12 | 14 | 0.14% | 23.60% | IAEQVAS 3.44<br>FQEEK                              | 1,378.68 |
| Control | 6018 | RecName gi 1141492 : 56,gi 75773 Full=Cate 615,gi 7836 nin alpha- 9272 1                                                                   | 100,117.00                                             | 100.00% | 12 | 12 | 14 | 0.14% | 23.60% | NAGTEQ 3.27<br>DLGIQY<br>K                         | 1,436.70 |
| Control | 6018 | RecName gi 1141492 : 56,gi 75773 Full=Cate 615,gi 7836 nin alpha- 9272 1                                                                   | 100,117.00                                             | 100.00% | 12 | 12 | 14 | 0.14% | 23.60% | NLMNAV 2.78<br>VQTVK                               | 1,232.67 |
| Control | 6018 | RecName gi 1141492 : 56,gi 75773 Full=Cate 615,gi 7836 nin alpha- 9272 1                                                                   | 100,117.00                                             | 100.00% | 12 | 12 | 14 | 0.14% | 23.60% | TSVQTE 4.43<br>DDQLIA<br>GQSAR                     | 1,818.88 |
| Control | 6018 | RecName gi 1141492 : 56,gi 75773 Full=Cate 615,gi 7836 nin alpha- 9272 1                                                                   | 100,117.00                                             | 100.00% | 12 | 12 | 14 | 0.14% | 23.60% | VIHVVTS 3.59<br>EMDNYE<br>PGVYTE<br>K              | 2,326.09 |
| Control | 6018 | RecName gi 1141492 : 56,gi 75773 Full=Cate 615,gi 7836 nin alpha- 9272 1                                                                   | 100,117.00                                             | 100.00% | 12 | 12 | 14 | 0.14% | 23.60% | VLTDVA 3.25<br>DDITSID<br>DFLAVS<br>ENHILED<br>VNK | 3,200.58 |
| Control | 6018 | RecName gi 1098952 : 13,gi 74354 Full=Tra 058,gi 7773 nsmembr 6477<br>ane and<br>coiled-<br>coil<br>domain-<br>containin<br>g protein<br>1 | 21,158.30                                              | 99.80%  | 2  | 2  | 2  | 0.02% | 15.40% | LPFTPLS 3.23<br>YIQGLSH<br>R                       | 1,728.94 |
| Control | 6018 | RecName gi 1098952 : 13,gi 74354 Full=Tra 058,gi 7773 nsmembr 6477<br>ane and<br>coiled-<br>coil<br>domain-<br>containin<br>g protein<br>1 | 21,158.30                                              | 99.80%  | 2  | 2  | 2  | 0.02% | 15.40% | QAGGFL 2.88<br>GPPPPSG<br>K                        | 1,309.69 |
| Control | 6018 | Heat shock 70kDa protein 5 (glucose-regulated protein, 78kDa)                                                                              | gi 1113084 72,383.60<br>68,gi 11549 5027,gi 152 941210 | 100.00% | 24 | 34 | 51 | 0.50% | 41.40% | AKFEEL 4.9<br>NMDLFR                               | 1,528.75 |

|         |      |                                                               |                                           |           |         |    |    |    |       |        |                            |      |          |
|---------|------|---------------------------------------------------------------|-------------------------------------------|-----------|---------|----|----|----|-------|--------|----------------------------|------|----------|
| Control | 6018 | Heat shock 70kDa protein 5 (glucose-regulated protein, 78kDa) | gi 1113084.68.gi 11549.5027.gi 152.941210 | 72,383.60 | 100.00% | 24 | 34 | 51 | 0.50% | 41.40% | DAGTIA<br>GLNVMR           | 3.72 | 1,233.63 |
| Control | 6018 | Heat shock 70kDa protein 5 (glucose-regulated protein, 78kDa) | gi 1113084.68.gi 11549.5027.gi 152.941210 | 72,383.60 | 100.00% | 24 | 34 | 51 | 0.50% | 41.40% | DNHLLG<br>TFDLTGI<br>PPAPR | 2.86 | 1,934.01 |
| Control | 6018 | Heat shock 70kDa protein 5 (glucose-regulated protein, 78kDa) | gi 1113084.68.gi 11549.5027.gi 152.941210 | 72,383.60 | 100.00% | 24 | 34 | 51 | 0.50% | 41.40% | EFFNGK<br>EPSR             | 2.85 | 1,210.59 |
| Control | 6018 | Heat shock 70kDa protein 5 (glucose-regulated protein, 78kDa) | gi 1113084.68.gi 11549.5027.gi 152.941210 | 72,383.60 | 100.00% | 24 | 34 | 51 | 0.50% | 41.40% | ELEEIVQ<br>PIISK           | 3.99 | 1,397.79 |
| Control | 6018 | Heat shock 70kDa protein 5 (glucose-regulated protein, 78kDa) | gi 1113084.68.gi 11549.5027.gi 152.941210 | 72,383.60 | 100.00% | 24 | 34 | 51 | 0.50% | 41.40% | IDTRNEL<br>ESYAYS<br>LK    | 3.94 | 1,801.90 |
| Control | 6018 | Heat shock 70kDa protein 5 (glucose-regulated protein, 78kDa) | gi 1113084.68.gi 11549.5027.gi 152.941210 | 72,383.60 | 100.00% | 24 | 34 | 51 | 0.50% | 41.40% | IEIESFYE<br>GEDFSE<br>TLTR | 4.43 | 2,164.99 |
| Control | 6018 | Heat shock 70kDa protein 5 (glucose-regulated protein, 78kDa) | gi 1113084.68.gi 11549.5027.gi 152.941210 | 72,383.60 | 100.00% | 24 | 34 | 51 | 0.50% | 41.40% | IINEPTA<br>AAIAYG<br>LDK   | 3.81 | 1,659.90 |
| Control | 6018 | Heat shock 70kDa protein 5 (glucose-regulated protein, 78kDa) | gi 1113084.68.gi 11549.5027.gi 152.941210 | 72,383.60 | 100.00% | 24 | 34 | 51 | 0.50% | 41.40% | IINEPTA<br>AAIAYG<br>LDKR  | 4.02 | 1,816.00 |

|         |      |                                                               |                                           |           |         |    |    |    |       |        |                      |      |          |
|---------|------|---------------------------------------------------------------|-------------------------------------------|-----------|---------|----|----|----|-------|--------|----------------------|------|----------|
| Control | 6018 | Heat shock 70kDa protein 5 (glucose-regulated protein, 78kDa) | gi 1113084.68.gi 11549.5027.gi 152.941210 | 72,383.60 | 100.00% | 24 | 34 | 51 | 0.50% | 41.40% | ITPSYVA FTPEGER      | 3.86 | 1,566.78 |
| Control | 6018 | Heat shock 70kDa protein 5 (glucose-regulated protein, 78kDa) | gi 1113084.68.gi 11549.5027.gi 152.941210 | 72,383.60 | 100.00% | 24 | 34 | 51 | 0.50% | 41.40% | KKELEEI VQPIISK      | 4.02 | 1,653.98 |
| Control | 6018 | Heat shock 70kDa protein 5 (glucose-regulated protein, 78kDa) | gi 1113084.68.gi 11549.5027.gi 152.941210 | 72,383.60 | 100.00% | 24 | 34 | 51 | 0.50% | 41.40% | KSQIFST ASDNQP TVTIK | 3.6  | 1,965.03 |
| Control | 6018 | Heat shock 70kDa protein 5 (glucose-regulated protein, 78kDa) | gi 1113084.68.gi 11549.5027.gi 152.941210 | 72,383.60 | 100.00% | 24 | 34 | 51 | 0.50% | 41.40% | KVTHAV VTVPAY FNDAQR | 3.01 | 2,016.07 |
| Control | 6018 | Heat shock 70kDa protein 5 (glucose-regulated protein, 78kDa) | gi 1113084.68.gi 11549.5027.gi 152.941210 | 72,383.60 | 100.00% | 24 | 34 | 51 | 0.50% | 41.40% | MKETAE AYLGKK        | 3.35 | 1,384.71 |
| Control | 6018 | Heat shock 70kDa protein 5 (glucose-regulated protein, 78kDa) | gi 1113084.68.gi 11549.5027.gi 152.941210 | 72,383.60 | 100.00% | 24 | 34 | 51 | 0.50% | 41.40% | MVNDAAE KFAEED KK    | 3.72 | 1,669.77 |
| Control | 6018 | Heat shock 70kDa protein 5 (glucose-regulated protein, 78kDa) | gi 1113084.68.gi 11549.5027.gi 152.941210 | 72,383.60 | 100.00% | 24 | 34 | 51 | 0.50% | 41.40% | NELESY AYSLK         | 2.89 | 1,316.64 |
| Control | 6018 | Heat shock 70kDa protein 5 (glucose-regulated protein, 78kDa) | gi 1113084.68.gi 11549.5027.gi 152.941210 | 72,383.60 | 100.00% | 24 | 34 | 51 | 0.50% | 41.40% | NQLTSN PENTVF DAK    | 4.11 | 1,677.81 |

|         |      |                                                               |                                                                                                             |           |         |    |    |    |       |        |                                    |      |          |
|---------|------|---------------------------------------------------------------|-------------------------------------------------------------------------------------------------------------|-----------|---------|----|----|----|-------|--------|------------------------------------|------|----------|
| Control | 6018 | Heat shock 70kDa protein 5 (glucose-regulated protein, 78kDa) | gi 1113084.68.gi 11549.5027.gi 152.941210                                                                   | 72,383.60 | 100.00% | 24 | 34 | 51 | 0.50% | 41.40% | NQLTSN<br>PENTVF<br>DAKR           | 4.04 | 1,833.91 |
| Control | 6018 | Heat shock 70kDa protein 5 (glucose-regulated protein, 78kDa) | gi 1113084.68.gi 11549.5027.gi 152.941210                                                                   | 72,383.60 | 100.00% | 24 | 34 | 51 | 0.50% | 41.40% | SQIFSTA<br>SDNQPT<br>VTIK          | 5.03 | 1,836.93 |
| Control | 6018 | Heat shock 70kDa protein 5 (glucose-regulated protein, 78kDa) | gi 1113084.68.gi 11549.5027.gi 152.941210                                                                   | 72,383.60 | 100.00% | 24 | 34 | 51 | 0.50% | 41.40% | TFAPEEI<br>SAMVLT<br>K             | 4.98 | 1,552.79 |
| Control | 6018 | Heat shock 70kDa protein 5 (glucose-regulated protein, 78kDa) | gi 1113084.68.gi 11549.5027.gi 152.941210                                                                   | 72,383.60 | 100.00% | 24 | 34 | 51 | 0.50% | 41.40% | TKPYIQV<br>DVGGGQ<br>TK            | 3.35 | 1,590.85 |
| Control | 6018 | Heat shock 70kDa protein 5 (glucose-regulated protein, 78kDa) | gi 1113084.68.gi 11549.5027.gi 152.941210                                                                   | 72,383.60 | 100.00% | 24 | 34 | 51 | 0.50% | 41.40% | TWNDPS<br>VQQDIK                   | 3.44 | 1,430.69 |
| Control | 6018 | Heat shock 70kDa protein 5 (glucose-regulated protein, 78kDa) | gi 1113084.68.gi 11549.5027.gi 152.941210                                                                   | 72,383.60 | 100.00% | 24 | 34 | 51 | 0.50% | 41.40% | VLESD<br>LKKSDID<br>EIVLVG<br>GSTR | 3.21 | 2,488.31 |
| Control | 6018 | Heat shock 70kDa protein 5 (glucose-regulated protein, 78kDa) | gi 1113084.68.gi 11549.5027.gi 152.941210                                                                   | 72,383.60 | 100.00% | 24 | 34 | 51 | 0.50% | 41.40% | VTHAVV<br>TVPAYF<br>NDAQR          | 4.26 | 1,887.97 |
| Control | 6018 | Junction plakoglobin                                          | gi 1096581.66.gi 15739.1363.gi 158.065994.gi 2.0336613.gi 211637709.gi 2181030.15.gi 51316.492.gi 5159.1897 | 81,804.10 | 100.00% | 3  | 4  | 5  | 0.05% | 6.71%  | LLNDED<br>PVVVTK                   | 3.37 | 1,341.73 |

|         |      |                                                         |                                                                                                                                          |           |         |   |   |   |       |        |                                   |          |
|---------|------|---------------------------------------------------------|------------------------------------------------------------------------------------------------------------------------------------------|-----------|---------|---|---|---|-------|--------|-----------------------------------|----------|
| Control | 6018 | Junction<br>plakoglob<br>in                             | gi 1096581<br>66,gi 15739<br>1363,gi 158<br>065994,gi 2<br>0336613,gi <br>211637709,<br>gi 2181030<br>15,gi 51316<br>492,gi 5159<br>1897 | 81,804.10 | 100.00% | 3 | 4 | 5 | 0.05% | 6.71%  | LNTIPLF 4.57<br>VQLLYS<br>SVENIQR | 2,347.30 |
| Control | 6018 | Junction<br>plakoglob<br>in                             | gi 1096581<br>66,gi 15739<br>1363,gi 158<br>065994,gi 2<br>0336613,gi <br>211637709,<br>gi 2181030<br>15,gi 51316<br>492,gi 5159<br>1897 | 81,804.10 | 100.00% | 3 | 4 | 5 | 0.05% | 6.71%  | TLVTQN 2.62<br>SGVEALI<br>HAILR   | 1,935.10 |
| Control | 6018 | RecName<br>:<br>Full=60S<br>ribosomal<br>protein<br>L11 | gi 1088609<br>25,gi 11549<br>7634,gi 742<br>68362                                                                                        | 20,235.20 | 99.80%  | 2 | 2 | 2 | 0.02% | 12.90% | VLEQLT 4.11<br>GQTPVF<br>SK       | 1,546.85 |
| Control | 6018 | RecName<br>:<br>Full=60S<br>ribosomal<br>protein<br>L11 | gi 1088609<br>25,gi 11549<br>7634,gi 742<br>68362                                                                                        | 20,235.20 | 99.80%  | 2 | 2 | 2 | 0.02% | 12.90% | YDGILP 2.5<br>GK                  | 975.5512 |
| Control | 6018 | syntaxin<br>7                                           | gi 1181508<br>40,gi 12214<br>0829,gi 735<br>86654                                                                                        | 29,638.60 | 99.80%  | 2 | 2 | 3 | 0.03% | 10.70% | EFGSLPT 2.73<br>TPSDQR            | 1,434.69 |
| Control | 6018 | syntaxin<br>7                                           | gi 1181508<br>40,gi 12214<br>0829,gi 735<br>86654                                                                                        | 29,638.60 | 99.80%  | 2 | 2 | 3 | 0.03% | 10.70% | TLNQLG 4.16<br>TPQDSPE<br>LR      | 1,668.86 |
| Control | 6018 | SEC11<br>homolog<br>A (S.<br>cerevisiae<br>)            | gi 1515546<br>19,gi 27806<br>149,gi 5403<br>9632,gi 697<br>9934                                                                          | 20,607.80 | 100.00% | 4 | 5 | 9 | 0.09% | 19.60% | GDLLFL 3.24<br>TNR                | 1,048.58 |
| Control | 6018 | SEC11<br>homolog<br>A (S.<br>cerevisiae<br>)            | gi 1515546<br>19,gi 27806<br>149,gi 5403<br>9632,gi 697<br>9934                                                                          | 20,607.80 | 100.00% | 4 | 5 | 9 | 0.09% | 19.60% | GDLLFL 3.31<br>TNRVED<br>PIR      | 1,757.95 |
| Control | 6018 | SEC11<br>homolog<br>A (S.<br>cerevisiae<br>)            | gi 1515546<br>19,gi 27806<br>149,gi 5403<br>9632,gi 697<br>9934                                                                          | 20,607.80 | 100.00% | 4 | 5 | 9 | 0.09% | 19.60% | MLSLDF 2<br>LDDVRR                | 1,495.76 |
| Control | 6018 | SEC11<br>homolog<br>A (S.<br>cerevisiae<br>)            | gi 1515546<br>19,gi 27806<br>149,gi 5403<br>9632,gi 697<br>9934                                                                          | 20,607.80 | 100.00% | 4 | 5 | 9 | 0.09% | 19.60% | VGEIVVF 2.64<br>R                 | 918.5407 |

|         |      |                                                                                                                                                               |                                                                   |           |         |   |    |    |       |        |                                        |          |
|---------|------|---------------------------------------------------------------------------------------------------------------------------------------------------------------|-------------------------------------------------------------------|-----------|---------|---|----|----|-------|--------|----------------------------------------|----------|
| Control | 6018 | RecName<br>:<br>Full=Acy<br>l-protein<br>thioestera<br>se 1;<br>AltName:<br>Full=Lys<br>ophospho<br>lipase 1;<br>AltName:<br>Full=Lys<br>ophospho<br>lipase I | gi 1153116<br>36,gi 75948<br>308,gi 7773<br>6321                  | 24,578.40 | 99.80%  | 2 | 2  | 2  | 0.02% | 10.40% | ASFPQGP 2.73<br>IGGVNR                 | 1,299.68 |
| Control | 6018 | RecName<br>:<br>Full=Acy<br>l-protein<br>thioestera<br>se 1;<br>AltName:<br>Full=Lys<br>ophospho<br>lipase 1;<br>AltName:<br>Full=Lys<br>ophospho<br>lipase I | gi 1153116<br>36,gi 75948<br>308,gi 7773<br>6321                  | 24,578.40 | 99.80%  | 2 | 2  | 2  | 0.02% | 10.40% | TLVNPA 2.98<br>NVTFR                   | 1,231.68 |
| Control | 6018 | PREDIC<br>TED:<br>brain<br>protein<br>44                                                                                                                      | gi 1198890<br>10,gi 19466<br>5199                                 | 14,264.40 | 99.90%  | 2 | 4  | 7  | 0.07% | 18.90% | LRPLYN 2.94<br>HPAGPR                  | 1,390.77 |
| Control | 6018 | PREDIC<br>TED:<br>brain<br>protein<br>44                                                                                                                      | gi 1198890<br>10,gi 19466<br>5199                                 | 14,264.40 | 99.90%  | 2 | 4  | 7  | 0.07% | 18.90% | VLDKVE 4.03<br>LLLPEK                  | 1,395.85 |
| Control | 6018 | SLC3A2<br>protein                                                                                                                                             | gi 1153049<br>25,gi 16444<br>8600,gi 598<br>57795,gi 74<br>354296 | 63,166.50 | 100.00% | 9 | 10 | 16 | 0.16% | 21.30% | EDFESLL 2.91<br>HSAK                   | 1,275.62 |
| Control | 6018 | SLC3A2<br>protein                                                                                                                                             | gi 1153049<br>25,gi 16444<br>8600,gi 598<br>57795,gi 74<br>354296 | 63,166.50 | 100.00% | 9 | 10 | 16 | 0.16% | 21.30% | FLVVLN 5.03<br>FGDVGQ<br>LAR           | 1,647.92 |
| Control | 6018 | SLC3A2<br>protein                                                                                                                                             | gi 1153049<br>25,gi 16444<br>8600,gi 598<br>57795,gi 74<br>354296 | 63,166.50 | 100.00% | 9 | 10 | 16 | 0.16% | 21.30% | FTGLSKE 3.23<br>ELLK                   | 1,264.71 |
| Control | 6018 | SLC3A2<br>protein                                                                                                                                             | gi 1153049<br>25,gi 16444<br>8600,gi 598<br>57795,gi 74<br>354296 | 63,166.50 | 100.00% | 9 | 10 | 16 | 0.16% | 21.30% | LLIAGTD 4.77<br>SSDLQI<br>LR           | 1,742.97 |
| Control | 6018 | SLC3A2<br>protein                                                                                                                                             | gi 1153049<br>25,gi 16444<br>8600,gi 598<br>57795,gi 74<br>354296 | 63,166.50 | 100.00% | 9 | 10 | 16 | 0.16% | 21.30% | NQEDDL 5.71<br>TETNLE<br>QIDPIFG<br>SK | 2,406.13 |

|         |      |                             |                                                   |           |         |   |    |    |       |        |                                     |      |          |
|---------|------|-----------------------------|---------------------------------------------------|-----------|---------|---|----|----|-------|--------|-------------------------------------|------|----------|
| Control | 6018 | SLC3A2 protein              | gi 115304925,gi 164448600,gi 59857795,gi 74354296 | 63,166.50 | 100.00% | 9 | 10 | 16 | 0.16% | 21.30% | SL LHGD<br>FYDLSS<br>GPDFLS<br>YIR  | 4.03 | 2,402.17 |
| Control | 6018 | SLC3A2 protein              | gi 115304925,gi 164448600,gi 59857795,gi 74354296 | 63,166.50 | 100.00% | 9 | 10 | 16 | 0.16% | 21.30% | SVSEDR<br>LLIAGTD<br>SSDLQQI<br>LR  | 4.19 | 2,416.27 |
| Control | 6018 | SLC3A2 protein              | gi 115304925,gi 164448600,gi 59857795,gi 74354296 | 63,166.50 | 100.00% | 9 | 10 | 16 | 0.16% | 21.30% | VDLLLS<br>TQPGR                     | 3.25 | 1,198.68 |
| Control | 6018 | SLC3A2 protein              | gi 115304925,gi 164448600,gi 59857795,gi 74354296 | 63,166.50 | 100.00% | 9 | 10 | 16 | 0.16% | 21.30% | VILDLT<br>NYK                       | 2.91 | 1,175.67 |
| Control | 6018 | MHC class I antigen         | gi 84095083                                       | 40,657.50 | 100.00% | 7 | 9  | 85 | 0.83% | 24.00% | DYIALNE<br>DLR                      | 3.37 | 1,221.61 |
| Control | 6018 | MHC class I antigen         | gi 84095083                                       | 40,657.50 | 100.00% | 7 | 9  | 85 | 0.83% | 24.00% | FIAVGY<br>VDDTQF<br>VR              | 5.3  | 1,629.83 |
| Control | 6018 | MHC class I antigen         | gi 84095083                                       | 40,657.50 | 100.00% | 7 | 9  | 85 | 0.83% | 24.00% | IYTQAAS<br>SDSAQG<br>SDVSLT<br>VPK  | 5.88 | 2,225.09 |
| Control | 6018 | MHC class I antigen         | gi 84095083                                       | 40,657.50 | 100.00% | 7 | 9  | 85 | 0.83% | 24.00% | IYTQAAS<br>SDSAQG<br>SDVSLT<br>VPKV | 5.11 | 2,324.16 |
| Control | 6018 | MHC class I antigen         | gi 84095083                                       | 40,657.50 | 100.00% | 7 | 9  | 85 | 0.83% | 24.00% | SWTAAD<br>TAAQIT<br>K               | 4.35 | 1,363.69 |
| Control | 6018 | MHC class I antigen         | gi 84095083                                       | 40,657.50 | 100.00% | 7 | 9  | 85 | 0.83% | 24.00% | VQHEGL<br>QEPLTLR                   | 4.05 | 1,519.82 |
| Control | 6018 | MHC class I antigen         | gi 84095083                                       | 40,657.50 | 100.00% | 7 | 9  | 85 | 0.83% | 24.00% | WAALVV<br>PSGEEQ<br>R               | 3.61 | 1,441.74 |
| Control | 6018 | DDR GK domain containin g 1 | gi 115496153,gi 94534940                          | 35,649.00 | 99.80%  | 2 | 3  | 3  | 0.03% | 9.58%  | FIYTPEE<br>LAAVAN<br>FIR            | 3.97 | 1,967.06 |
| Control | 6018 | DDR GK domain containin g 1 | gi 115496153,gi 94534940                          | 35,649.00 | 99.80%  | 2 | 3  | 3  | 0.03% | 9.58%  | LRLEEE<br>QKEEEE<br>R               | 2.55 | 1,716.84 |

|         |      |                                                                                                                                                                                                                                                                              |                                                  |           |         |   |   |   |       |       |                                 |          |
|---------|------|------------------------------------------------------------------------------------------------------------------------------------------------------------------------------------------------------------------------------------------------------------------------------|--------------------------------------------------|-----------|---------|---|---|---|-------|-------|---------------------------------|----------|
| Control | 6018 | RecName<br>:<br>Full=Seri<br>ne<br>palmitoyl<br>transferas<br>e 1;<br>AltName:<br>Full=Seri<br>ne-<br>palmitoyl-<br>CoA<br>transferas<br>e 1;<br>Short=SP<br>T 1;<br>Short=SP<br>T1;<br>AltName:<br>Full=Lon<br>g chain<br>base<br>biosynthe<br>sis<br>protein 1;<br>Short=L | gi 1221399<br>29,gi 75948<br>211,gi 7773<br>6443 | 52,771.80 | 99.80%  | 2 | 3 | 4 | 0.04% | 5.92% | LLKEQEI 2.95<br>EDQKNP<br>R     | 1,739.93 |
| Control | 6018 | RecName<br>:<br>Full=Seri<br>ne<br>palmitoyl<br>transferas<br>e 1;<br>AltName:<br>Full=Seri<br>ne-<br>palmitoyl-<br>CoA<br>transferas<br>e 1;<br>Short=SP<br>T 1;<br>Short=SP<br>T1;<br>AltName:<br>Full=Lon<br>g chain<br>base<br>biosynthe<br>sis<br>protein 1;<br>Short=L | gi 1221399<br>29,gi 75948<br>211,gi 7773<br>6443 | 52,771.80 | 99.80%  | 2 | 3 | 4 | 0.04% | 5.92% | VVVTVE 3.62<br>QTEEDL<br>EK     | 1,617.82 |
| Control | 6018 | eukaryoti<br>c<br>translatio<br>n<br>elongatio<br>n factor 2                                                                                                                                                                                                                 | gi 1154979<br>00,gi 74353<br>984,gi 8890<br>9609 | 95,352.20 | 100.00% | 3 | 3 | 3 | 0.03% | 4.90% | ALLELQ 3.93<br>LEPEELY<br>QTFQR | 2,220.15 |
| Control | 6018 | eukaryoti<br>c<br>translatio<br>n<br>elongatio<br>n factor 2                                                                                                                                                                                                                 | gi 1154979<br>00,gi 74353<br>984,gi 8890<br>9609 | 95,352.20 | 100.00% | 3 | 3 | 3 | 0.03% | 4.90% | EGIPALD 2.67<br>NFLDKL          | 1,444.77 |



|         |      |                                                                                                                                                   |                                                                                  |           |         |   |   |   |       |        |                                     |      |          |
|---------|------|---------------------------------------------------------------------------------------------------------------------------------------------------|----------------------------------------------------------------------------------|-----------|---------|---|---|---|-------|--------|-------------------------------------|------|----------|
| Control | 6018 | eukaryoti<br>c<br>translatio<br>n<br>elongatio<br>n factor 2                                                                                      | gi 1154979<br>00,gi 74353<br>984,gi 8890<br>9609                                 | 95,352.20 | 100.00% | 3 | 3 | 3 | 0.03% | 4.90%  | VFSGLV<br>STGLK                     | 2.52 | 1,107.64 |
| Control | 6018 | RecName<br>:<br>Full=Syn<br>aptic<br>glycoprot<br>ein SC2;<br>AltName:<br>Full=Tra<br>ns-2,3-<br>enoyl-<br>CoA<br>reductase<br>;<br>Short=TE<br>R | gi 1221409<br>18,gi 73586<br>600,gi 7773<br>6441                                 | 36,056.10 | 100.00% | 3 | 3 | 3 | 0.03% | 10.40% | HYEVEIL<br>DAK                      | 2.55 | 1,216.62 |
| Control | 6018 | RecName<br>:<br>Full=Syn<br>aptic<br>glycoprot<br>ein SC2;<br>AltName:<br>Full=Tra<br>ns-2,3-<br>enoyl-<br>CoA<br>reductase<br>;<br>Short=TE<br>R | gi 1221409<br>18,gi 73586<br>600,gi 7773<br>6441                                 | 36,056.10 | 100.00% | 3 | 3 | 3 | 0.03% | 10.40% | LPVGT<br>ATLYFR                     | 3.45 | 1,338.74 |
| Control | 6018 | RecName<br>:<br>Full=Syn<br>aptic<br>glycoprot<br>ein SC2;<br>AltName:<br>Full=Tra<br>ns-2,3-<br>enoyl-<br>CoA<br>reductase<br>;<br>Short=TE<br>R | gi 1221409<br>18,gi 73586<br>600,gi 7773<br>6441                                 | 36,056.10 | 100.00% | 3 | 3 | 3 | 0.03% | 10.40% | SLKDED<br>VLQK                      | 2.9  | 1,174.63 |
| Control | 6018 | RecName<br>:<br>Full=Gal<br>ectin-9                                                                                                               | gi 1221450<br>68,gi 59858<br>325,gi 6275<br>1460,gi 757<br>75171,gi 87<br>044899 | 39,329.70 | 100.00% | 3 | 4 | 5 | 0.05% | 9.86%  | LKNLPAI<br>NNLEVG<br>GDIQLT<br>HVQT | 3.36 | 2,487.36 |
| Control | 6018 | RecName<br>:<br>Full=Gal<br>ectin-9                                                                                                               | gi 1221450<br>68,gi 59858<br>325,gi 6275<br>1460,gi 757<br>75171,gi 87<br>044899 | 39,329.70 | 100.00% | 3 | 4 | 5 | 0.05% | 9.86%  | NLPAINN<br>LEVGGD<br>IQLTHV<br>QT   | 5.15 | 2,246.18 |

|         |      |                                                                               |                                                                                  |            |         |   |   |   |       |        |                                          |          |
|---------|------|-------------------------------------------------------------------------------|----------------------------------------------------------------------------------|------------|---------|---|---|---|-------|--------|------------------------------------------|----------|
| Control | 6018 | RecName<br>:<br>Full=Gal<br>ectin-9                                           | gi 1221450<br>68,gi 59858<br>325,gi 6275<br>1460,gi 757<br>75171,gi 87<br>044899 | 39,329.70  | 100.00% | 3 | 4 | 5 | 0.05% | 9.86%  | SGSDIAF 2.9<br>HLNPR                     | 1,313.66 |
| Control | 6018 | PREDIC<br>TED:<br>similar to<br>Calpain-5<br>(nCL-3)<br>(htra-3)<br>isoform 1 | gi 7663613<br>4                                                                  | 72,988.00  | 100.00% | 3 | 3 | 3 | 0.03% | 8.12%  | ANADDL 2.98<br>QALHTL<br>HLR             | 1,687.89 |
| Control | 6018 | PREDIC<br>TED:<br>similar to<br>Calpain-5<br>(nCL-3)<br>(htra-3)<br>isoform 1 | gi 7663613<br>4                                                                  | 72,988.00  | 100.00% | 3 | 3 | 3 | 0.03% | 8.12%  | VLFEDP 2.63<br>NFPATD<br>DSLYYK          | 2,134.00 |
| Control | 6018 | PREDIC<br>TED:<br>similar to<br>Calpain-5<br>(nCL-3)<br>(htra-3)<br>isoform 1 | gi 7663613<br>4                                                                  | 72,988.00  | 100.00% | 3 | 3 | 3 | 0.03% | 8.12%  | YVIIPTT 2.13<br>FEPGHT<br>GEFLLR         | 2,190.16 |
| Control | 6018 | PREDIC<br>TED:<br>similar to<br>SMILE<br>protein                              | gi 1946670<br>13                                                                 | 104,216.00 | 99.80%  | 2 | 2 | 3 | 0.03% | 4.25%  | DKISSSS 3.61<br>FVEQPIF<br>PAGK          | 1,937.00 |
| Control | 6018 | PREDIC<br>TED:<br>similar to<br>SMILE<br>protein                              | gi 1946670<br>13                                                                 | 104,216.00 | 99.80%  | 2 | 2 | 3 | 0.03% | 4.25%  | YFLQAT 4.59<br>HVQPDD<br>IGAHMN<br>VGR   | 2,385.14 |
| Control | 6018 | RAB5C,<br>member                                                              | gi 1096591<br>70,gi 61553                                                        | 23,448.70  | 100.00% | 4 | 4 | 5 | 0.05% | 21.80% | GVDLQE 3.28<br>NNPASR                    | 1,299.63 |
| Control | 6018 | RAS<br>oncogene<br>family                                                     | 191,gi 7505<br>2596,gi 777<br>36431                                              | 23,448.70  | 100.00% | 4 | 4 | 5 | 0.05% | 21.80% | LVLLGE 2.98<br>SAVGK                     | 1,085.66 |
| Control | 6018 | RAB5C,<br>member                                                              | gi 1096591<br>70,gi 61553                                                        | 23,448.70  | 100.00% | 4 | 4 | 5 | 0.05% | 21.80% | QASPNIV 3.23<br>IALAGN<br>K              | 1,395.80 |
| Control | 6018 | RAS<br>oncogene<br>family                                                     | 191,gi 7505<br>2596,gi 777<br>36431                                              | 23,448.70  | 100.00% | 4 | 4 | 5 | 0.05% | 21.80% | YHSLAP 2.31<br>MYR                       | 1,316.61 |
| Control | 6018 | Coiled-<br>coil-helix-<br>coiled-<br>coil-helix<br>domain<br>containin<br>g 9 | gi 7358724<br>9,gi 777364<br>37                                                  | 15,615.40  | 99.80%  | 2 | 2 | 2 | 0.02% | 43.10% | QFLECA 3.31<br>QSQGDL<br>KLCEGF<br>SEVLK | 2,572.24 |

|         |      |                                                                                         |                                 |           |         |   |   |    |       |        |                                                                     |      |          |
|---------|------|-----------------------------------------------------------------------------------------|---------------------------------|-----------|---------|---|---|----|-------|--------|---------------------------------------------------------------------|------|----------|
| Control | 6018 | Coiled-coil-helix-9,gi7358724<br>coiled-coil-helix domain containin<br>g 9              | gi7358724                       | 15,615.40 | 99.80%  | 2 | 2 | 2  | 0.02% | 43.10% | QPGLMA<br>QMATTA<br>AGVAVG<br>SAVGHT<br>LGHAIT<br>GGFSGG<br>SSAEPSR | 3.86 | 4,010.95 |
| Control | 6018 | PREDIC TED:<br>similar to<br>RAB6A,<br>member<br>RAS<br>oncogene<br>family<br>isoform 2 | gi1199075<br>95,gi11990<br>7597 | 23,545.30 | 100.00% | 6 | 7 | 12 | 0.12% | 32.70% | ELNVMF<br>IETSAK                                                    | 3.72 | 1,397.70 |
| Control | 6018 | PREDIC TED:<br>similar to<br>RAB6A,<br>member<br>RAS<br>oncogene<br>family<br>isoform 2 | gi1199075<br>95,gi11990<br>7597 | 23,545.30 | 100.00% | 6 | 7 | 12 | 0.12% | 32.70% | GSDVIIM<br>LVGNK                                                    | 3.19 | 1,261.68 |
| Control | 6018 | PREDIC TED:<br>similar to<br>RAB6A,<br>member<br>RAS<br>oncogene<br>family<br>isoform 2 | gi1199075<br>95,gi11990<br>7597 | 23,545.30 | 100.00% | 6 | 7 | 12 | 0.12% | 32.70% | GSDVIIM<br>LVGNKT<br>DLADKR                                         | 3.45 | 2,061.10 |
| Control | 6018 | PREDIC TED:<br>similar to<br>RAB6A,<br>member<br>RAS<br>oncogene<br>family<br>isoform 2 | gi1199075<br>95,gi11990<br>7597 | 23,545.30 | 100.00% | 6 | 7 | 12 | 0.12% | 32.70% | LQLWDT<br>AGQER                                                     | 2.62 | 1,316.66 |
| Control | 6018 | PREDIC TED:<br>similar to<br>RAB6A,<br>member<br>RAS<br>oncogene<br>family<br>isoform 2 | gi1199075<br>95,gi11990<br>7597 | 23,545.30 | 100.00% | 6 | 7 | 12 | 0.12% | 32.70% | LVFLGE<br>QSVGK                                                     | 2.35 | 1,176.66 |
| Control | 6018 | PREDIC TED:<br>similar to<br>RAB6A,<br>member<br>RAS<br>oncogene<br>family<br>isoform 2 | gi1199075<br>95,gi11990<br>7597 | 23,545.30 | 100.00% | 6 | 7 | 12 | 0.12% | 32.70% | RVAAAL<br>PGMEST<br>QDR                                             | 3.3  | 1,617.80 |

|         |      |                                                                                                                                                                                |
|---------|------|--------------------------------------------------------------------------------------------------------------------------------------------------------------------------------|
| Control | 6018 | PREDIC TED: gi 1199075 23,545.30 100.00% 6 7 12 0.12% 32.70% VAAALP 3.19 1,461.70<br>similar to 95.gi 11990 7597<br>RAB6A,<br>member<br>RAS<br>oncogene<br>family<br>isoform 2 |
| Control | 6018 | PREDIC TED: gi 1946763 41,854.80 99.80% 2 2 3 0.03% 24.70% DLTDYL 2.07 1,014.48<br>similar to 88<br>Actin,<br>cytoplas<br>mic 2<br>(Beta-<br>actin-2)                          |
| Control | 6018 | PREDIC TED: gi 1946763 41,854.80 99.80% 2 2 3 0.03% 24.70% GYSFTT 3.39 1,132.53<br>similar to 88<br>Actin,<br>cytoplas<br>mic 2<br>(Beta-<br>actin-2)                          |
| Control | 6018 | PREDIC TED: gi 1946763 41,854.80 99.80% 2 2 3 0.03% 24.70% HQGVM 3.59 2,383.05<br>similar to 88<br>Actin,<br>cytoplas<br>mic 2<br>(Beta-<br>actin-2)                           |
| Control | 6018 | PREDIC TED: gi 1946763 41,854.80 99.80% 2 2 3 0.03% 24.70% HQGVM 3.8 2,539.15<br>similar to 88<br>Actin,<br>cytoplas<br>mic 2<br>(Beta-<br>actin-2)                            |
| Control | 6018 | PREDIC TED: gi 1946763 41,854.80 99.80% 2 2 3 0.03% 24.70% LDLAGR 2.18 1,639.84<br>similar to 88<br>Actin,<br>cytoplas<br>mic 2<br>(Beta-<br>actin-2)                          |
| Control | 6018 | PREDIC TED: gi 1946763 41,854.80 99.80% 2 2 3 0.03% 24.70% SYELPD 3.46 1,790.89<br>similar to 88<br>Actin,<br>cytoplas<br>mic 2<br>(Beta-<br>actin-2)                          |
| Control | 6018 | PREDIC TED: gi 1946763 41,854.80 99.80% 2 2 3 0.03% 24.70% TTGIVM 6.85 3,199.61<br>similar to 88<br>Actin,<br>cytoplas<br>mic 2<br>(Beta-<br>actin-2)                          |

|         |      |                                                                                                                                                                                   |                                                                 |            |         |    |    |       |        |                                               |                       |          |          |
|---------|------|-----------------------------------------------------------------------------------------------------------------------------------------------------------------------------------|-----------------------------------------------------------------|------------|---------|----|----|-------|--------|-----------------------------------------------|-----------------------|----------|----------|
| Control | 6018 | tyrosine 3-gi 2780619<br>monoxy 7,gi 367639<br>genase/tr 9,gi 711537<br>yptophan 79,gi 73586<br>5-683<br>monoxy<br>genase<br>activation<br>protein,<br>epsilon<br>polypepti<br>de | 29,157.00                                                       | 100.00%    | 2       | 3  | 6  | 0.06% | 15.70% | AAFDDA<br>IAELDTL<br>SEESYK<br>DSTLIM<br>QLLR | 4.42                  | 3,274.60 |          |
| Control | 6018 | tyrosine 3-gi 2780619<br>monoxy 7,gi 367639<br>genase/tr 9,gi 711537<br>yptophan 79,gi 73586<br>5-683<br>monoxy<br>genase<br>activation<br>protein,<br>epsilon<br>polypepti<br>de | 29,157.00                                                       | 100.00%    | 2       | 3  | 6  | 0.06% | 15.70% | EAAENS<br>LVAYK                               | 2.08                  | 1,194.60 |          |
| Control | 6018 | Transduc<br>in (beta)-<br>like 2                                                                                                                                                  | gi 1123623<br>03,gi 11549<br>5815                               | 49,894.00  | 99.80%  | 2  | 2  | 2     | 0.02%  | 5.83%                                         | APIVNIGI<br>ADTGK     | 3.12     | 1,268.72 |
| Control | 6018 | Transduc<br>in (beta)-<br>like 2                                                                                                                                                  | gi 1123623<br>03,gi 11549<br>5815                               | 49,894.00  | 99.80%  | 2  | 2  | 2     | 0.02%  | 5.83%                                         | LQQQLT<br>QAQEAL<br>K | 4.6      | 1,498.82 |
| Control | 6018 | RecName<br>:<br>Full=Coil<br>ed-coil<br>domain-<br>containin<br>g protein<br>56                                                                                                   | gi 1089359<br>63,gi 74268<br>043,gi 7773<br>6311                | 11,689.70  | 99.80%  | 2  | 2  | 2     | 0.02%  | 18.90%                                        | FLDELE<br>DEAK        | 3.55     | 1,208.57 |
| Control | 6018 | RecName<br>:<br>Full=Coil<br>ed-coil<br>domain-<br>containin<br>g protein<br>56                                                                                                   | gi 1089359<br>63,gi 74268<br>043,gi 7773<br>6311                | 11,689.70  | 99.80%  | 2  | 2  | 2     | 0.02%  | 18.90%                                        | LTPAQL<br>QFMR        | 2.2      | 1,220.65 |
| Control | 6018 | proteaso<br>me<br>activator<br>28 alpha<br>subunit                                                                                                                                | gi 6313965<br>0,gi 739218<br>36,gi 86821<br>522,gi 9168<br>0535 | 28,675.80  | 100.00% | 2  | 2  | 2     | 0.02%  | 9.64%                                         | NAYAVL<br>YDILK       | 3.35     | 1,395.79 |
| Control | 6018 | proteaso<br>me<br>activator<br>28 alpha<br>subunit                                                                                                                                | gi 6313965<br>0,gi 739218<br>36,gi 86821<br>522,gi 9168<br>0535 | 28,675.80  | 100.00% | 2  | 2  | 2     | 0.02%  | 9.64%                                         | QLVHEL<br>DEAEYR      | 2.33     | 1,501.73 |
| Control | 6018 | Hexokina<br>se 1                                                                                                                                                                  | gi 1544261<br>22,gi 33332<br>343,gi 6059<br>2784                | 102,191.60 | 100.00% | 12 | 16 | 23    | 0.22%  | 14.50%                                        | FNTSDV<br>SAIEK       | 3.09     | 1,210.60 |
| Control | 6018 | Hexokina<br>se 1                                                                                                                                                                  | gi 1544261<br>22,gi 33332<br>343,gi 6059<br>2784                | 102,191.60 | 100.00% | 12 | 16 | 23    | 0.22%  | 14.50%                                        | GAALITA<br>VGVR       | 2.9      | 1,027.63 |
| Control | 6018 | Hexokina<br>se 1                                                                                                                                                                  | gi 1544261<br>22,gi 33332<br>343,gi 6059<br>2784                | 102,191.60 | 100.00% | 12 | 16 | 23    | 0.22%  | 14.50%                                        | GAAMVT<br>AVAYR       | 3.03     | 1,125.57 |

|         |      |                                                              |                                                  |            |         |    |    |    |       |        |                           |      |          |
|---------|------|--------------------------------------------------------------|--------------------------------------------------|------------|---------|----|----|----|-------|--------|---------------------------|------|----------|
| Control | 6018 | Hexokina<br>se 1                                             | gi 1544261<br>22,gi 33332<br>343,gi 6059<br>2784 | 102,191.60 | 100.00% | 12 | 16 | 23 | 0.22% | 14.50% | GKFNTS<br>DVSAIEK         | 3.18 | 1,395.71 |
| Control | 6018 | Hexokina<br>se 1                                             | gi 1544261<br>22,gi 33332<br>343,gi 6059<br>2784 | 102,191.60 | 100.00% | 12 | 16 | 23 | 0.22% | 14.50% | HIDLVE<br>GDEGR           | 3.71 | 1,239.60 |
| Control | 6018 | Hexokina<br>se 1                                             | gi 1544261<br>22,gi 33332<br>343,gi 6059<br>2784 | 102,191.60 | 100.00% | 12 | 16 | 23 | 0.22% | 14.50% | IDKYLY<br>AMR             | 2.15 | 1,188.61 |
| Control | 6018 | Hexokina<br>se 1                                             | gi 1544261<br>22,gi 33332<br>343,gi 6059<br>2784 | 102,191.60 | 100.00% | 12 | 16 | 23 | 0.22% | 14.50% | LSDETL<br>DIMNR           | 4.19 | 1,435.71 |
| Control | 6018 | Hexokina<br>se 1                                             | gi 1544261<br>22,gi 33332<br>343,gi 6059<br>2784 | 102,191.60 | 100.00% | 12 | 16 | 23 | 0.22% | 14.50% | LVDEFSL<br>NSGK           | 2.98 | 1,208.62 |
| Control | 6018 | Hexokina<br>se 1                                             | gi 1544261<br>22,gi 33332<br>343,gi 6059<br>2784 | 102,191.60 | 100.00% | 12 | 16 | 23 | 0.22% | 14.50% | QIEETLA<br>HFSLTK         | 3.23 | 1,516.80 |
| Control | 6018 | Hexokina<br>se 1                                             | gi 1544261<br>22,gi 33332<br>343,gi 6059<br>2784 | 102,191.60 | 100.00% | 12 | 16 | 23 | 0.22% | 14.50% | SANLVA<br>ATLGAIL<br>SR   | 4.06 | 1,456.85 |
| Control | 6018 | Hexokina<br>se 1                                             | gi 1544261<br>22,gi 33332<br>343,gi 6059<br>2784 | 102,191.60 | 100.00% | 12 | 16 | 23 | 0.22% | 14.50% | TTVGVD<br>GSLYK           | 2.72 | 1,139.59 |
| Control | 6018 | Hexokina<br>se 1                                             | gi 1544261<br>22,gi 33332<br>343,gi 6059<br>2784 | 102,191.60 | 100.00% | 12 | 16 | 23 | 0.22% | 14.50% | YLSQIES<br>DRLALL<br>QVR  | 3.31 | 1,904.06 |
| Control | 6018 | RecName<br>:<br>Full=Cad<br>herin-13;<br>Flags:<br>Precursor | gi 1108327<br>87,gi 77567<br>834,gi 7836<br>9244 | 78,179.40  | 100.00% | 5  | 7  | 7  | 0.07% | 10.80% | DIQGLQ<br>DIFK            | 3.47 | 1,263.66 |
| Control | 6018 | RecName<br>:<br>Full=Cad<br>herin-13;<br>Flags:<br>Precursor | gi 1108327<br>87,gi 77567<br>834,gi 7836<br>9244 | 78,179.40  | 100.00% | 5  | 7  | 7  | 0.07% | 10.80% | INENTGS<br>VSVTR          | 4.03 | 1,276.65 |
| Control | 6018 | RecName<br>:<br>Full=Cad<br>herin-13;<br>Flags:<br>Precursor | gi 1108327<br>87,gi 77567<br>834,gi 7836<br>9244 | 78,179.40  | 100.00% | 5  | 7  | 7  | 0.07% | 10.80% | MTAFDA<br>DDPATD<br>NALLR | 4.02 | 1,852.84 |
| Control | 6018 | RecName<br>:<br>Full=Cad<br>herin-13;<br>Flags:<br>Precursor | gi 1108327<br>87,gi 77567<br>834,gi 7836<br>9244 | 78,179.40  | 100.00% | 5  | 7  | 7  | 0.07% | 10.80% | SIVVSPIL<br>IPENQR        | 2.36 | 1,564.91 |

|         |      |                                                                                                                                             |                                                  |            |         |   |   |   |       |        |                                     |      |          |
|---------|------|---------------------------------------------------------------------------------------------------------------------------------------------|--------------------------------------------------|------------|---------|---|---|---|-------|--------|-------------------------------------|------|----------|
| Control | 6018 | RecName<br>:<br>Full=Cad<br>herin-13;<br>Flags:<br>Precursor                                                                                | gi 1108327<br>87,gi 77567<br>834,gi 7836<br>9244 | 78,179.40  | 100.00% | 5 | 7 | 7 | 0.07% | 10.80% | TLEGPV<br>PLEVIVI<br>DQNDNR<br>PIFR | 2.09 | 2,634.43 |
| Control | 6018 | alpha-<br>actinin 1                                                                                                                         | gi 1452864<br>37,gi 77567<br>675,gi 7836<br>9242 | 102,966.00 | 99.80%  | 2 | 2 | 4 | 0.04% | 3.70%  | IDQLEG<br>DHQLIQ<br>EALIFDN<br>K    | 6.12 | 2,339.19 |
| Control | 6018 | alpha-<br>actinin 1                                                                                                                         | gi 1452864<br>37,gi 77567<br>675,gi 7836<br>9242 | 102,966.00 | 99.80%  | 2 | 2 | 4 | 0.04% | 3.70%  | LSNRPAF<br>MPSEGR                   | 3.2  | 1,477.72 |
| Control | 6018 | PREDIC<br>TED:<br>similar to<br>eukaryoti<br>c<br>translatio<br>n<br>initiation<br>factor 3,<br>subunit 5<br>epsilon,<br>47kDa<br>isoform 1 | gi 1946732<br>84                                 | 40,877.60  | 99.80%  | 2 | 3 | 4 | 0.04% | 7.69%  | FLMSLV<br>NQVPK                     | 2.89 | 1,291.71 |
| Control | 6018 | PREDIC<br>TED:<br>similar to<br>eukaryoti<br>c<br>translatio<br>n<br>initiation<br>factor 3,<br>subunit 5<br>epsilon,<br>47kDa<br>isoform 1 | gi 1946732<br>84                                 | 40,877.60  | 99.80%  | 2 | 3 | 4 | 0.04% | 7.69%  | IQDALST<br>VLQYAE<br>DVLSGK         | 4.94 | 2,050.07 |
| Control | 6018 | PREDIC<br>TED:<br>similar to<br>program<br>med cell<br>death 8<br>isoform 2                                                                 | gi 7665865<br>7                                  | 66,854.50  | 100.00% | 4 | 4 | 5 | 0.05% | 9.95%  | ATSSALE<br>GEPEPQ<br>VR             | 4.03 | 1,570.77 |
| Control | 6018 | PREDIC<br>TED:<br>similar to<br>program<br>med cell<br>death 8<br>isoform 2                                                                 | gi 7665865<br>7                                  | 66,854.50  | 100.00% | 4 | 4 | 5 | 0.05% | 9.95%  | IPSHVPF<br>LLIGGGT<br>AAFAAA<br>R   | 4.22 | 2,066.15 |
| Control | 6018 | PREDIC<br>TED:<br>similar to<br>program<br>med cell<br>death 8<br>isoform 2                                                                 | gi 7665865<br>7                                  | 66,854.50  | 100.00% | 4 | 4 | 5 | 0.05% | 9.95%  | ISGLGLT<br>PEEK                     | 2.93 | 1,143.63 |
| Control | 6018 | PREDIC<br>TED:<br>similar to<br>program<br>med cell<br>death 8<br>isoform 2                                                                 | gi 7665865<br>7                                  | 66,854.50  | 100.00% | 4 | 4 | 5 | 0.05% | 9.95%  | TGGLEID<br>SDFGGF<br>R              | 4.08 | 1,470.69 |

|         |      |                                                                                                                                                                        |                                          |           |         |   |    |    |       |        |                                             |          |
|---------|------|------------------------------------------------------------------------------------------------------------------------------------------------------------------------|------------------------------------------|-----------|---------|---|----|----|-------|--------|---------------------------------------------|----------|
| Control | 6018 | RecName<br>:<br>Full=Cad<br>herin-2;<br>AltName:<br>Full=Neu<br>ral<br>cadherin;<br>Short=N-<br>cadherin;<br>AltName:<br>CD_antig<br>en=CD32<br>5; Flags:<br>Precursor | gi 115421.g<br>i 19467806<br>8,gi 664894 | 96,830.40 | 100.00% | 7 | 10 | 13 | 0.13% | 18.80% | FAIQTDP 3.32<br>NSNDGL<br>VTVVKPI<br>DFETNR | 2,890.46 |
| Control | 6018 | RecName<br>:<br>Full=Cad<br>herin-2;<br>AltName:<br>Full=Neu<br>ral<br>cadherin;<br>Short=N-<br>cadherin;<br>AltName:<br>CD_antig<br>en=CD32<br>5; Flags:<br>Precursor | gi 115421.g<br>i 19467806<br>8,gi 664894 | 96,830.40 | 100.00% | 7 | 10 | 13 | 0.13% | 18.80% | FLEAGIY 5.46<br>EVPIITD<br>SGNPPK           | 2,273.21 |
| Control | 6018 | RecName<br>:<br>Full=Cad<br>herin-2;<br>AltName:<br>Full=Neu<br>ral<br>cadherin;<br>Short=N-<br>cadherin;<br>AltName:<br>CD_antig<br>en=CD32<br>5; Flags:<br>Precursor | gi 115421.g<br>i 19467806<br>8,gi 664894 | 96,830.40 | 100.00% | 7 | 10 | 13 | 0.13% | 18.80% | MYVLTV 2.31<br>AAENQV<br>PLAK               | 1,762.94 |



|         |      |                                                                                                                                                                        |                                          |           |         |   |    |    |       |        |                                                         |      |          |
|---------|------|------------------------------------------------------------------------------------------------------------------------------------------------------------------------|------------------------------------------|-----------|---------|---|----|----|-------|--------|---------------------------------------------------------|------|----------|
| Control | 6018 | RecName<br>:<br>Full=Cad<br>herin-2;<br>AltName:<br>Full=Neu<br>ral<br>cadherin;<br>Short=N-<br>cadherin;<br>AltName:<br>CD_antig<br>en=CD32<br>5; Flags:<br>Precursor | gi 115421.g<br>i 19467806<br>8,gi 664894 | 96,830.40 | 100.00% | 7 | 10 | 13 | 0.13% | 18.80% | QLLIDPE<br>DDVRDN<br>ILK                                | 2.42 | 1,896.01 |
| Control | 6018 | RecName<br>:<br>Full=Cad<br>herin-2;<br>AltName:<br>Full=Neu<br>ral<br>cadherin;<br>Short=N-<br>cadherin;<br>AltName:<br>CD_antig<br>en=CD32<br>5; Flags:<br>Precursor | gi 115421.g<br>i 19467806<br>8,gi 664894 | 96,830.40 | 100.00% | 7 | 10 | 13 | 0.13% | 18.80% | SAAPHP<br>GDIGDFI<br>NEGLK                              | 4.61 | 1,837.91 |
| Control | 6018 | RecName<br>:<br>Full=Cad<br>herin-2;<br>AltName:<br>Full=Neu<br>ral<br>cadherin;<br>Short=N-<br>cadherin;<br>AltName:<br>CD_antig<br>en=CD32<br>5; Flags:<br>Precursor | gi 115421.g<br>i 19467806<br>8,gi 664894 | 96,830.40 | 100.00% | 7 | 10 | 13 | 0.13% | 18.80% | YDEEGG<br>GEEDQD<br>YDLSQL<br>QQPDTV<br>EPDAIKP<br>VGIR | 6.83 | 3,905.78 |





|         |      |                                                                                                                                                                                                         |                                                                                                               |           |         |   |   |    |       |        |                                                            |      |          |
|---------|------|---------------------------------------------------------------------------------------------------------------------------------------------------------------------------------------------------------|---------------------------------------------------------------------------------------------------------------|-----------|---------|---|---|----|-------|--------|------------------------------------------------------------|------|----------|
| Control | 6018 | RecName :<br>Full=Cytochrome c1, heme protein, mitochondrial; AltName: Full=Ubiquinol-cytochrome c reductase complex cytochrome c1 subunit; Short=Cytochrome c-1; AltName: Full=Cytochrome b-c1 complex | gi 109940069,gi 114793904,gi 71042588,gi 75765182,gi 75765193,gi 82407279,gi 82407290,gi 83638779,gi 84000289 | 27,269.70 | 100.00% | 4 | 5 | 6  | 0.06% | 29.90% | MGLKM<br>LLMMGL<br>LLPLVY<br>AMK                           | 3.01 | 2,266.26 |
| Control | 6018 | F1-F0-ATPase                                                                                                                                                                                            | gi 162701,gi 231615,gi 28603752,gi 74268301                                                                   | 8,303.10  | 100.00% | 3 | 3 | 14 | 0.14% | 52.10% | ELAEAQ<br>EDTILK                                           | 3.71 | 1,359.70 |
| Control | 6018 | F1-F0-ATPase                                                                                                                                                                                            | gi 162701,gi 231615,gi 28603752,gi 74268301                                                                   | 8,303.10  | 100.00% | 3 | 3 | 14 | 0.14% | 52.10% | MVPPVQ<br>VSPLIK                                           | 2.12 | 1,323.77 |
| Control | 6018 | F1-F0-ATPase                                                                                                                                                                                            | gi 162701,gi 231615,gi 28603752,gi 74268301                                                                   | 8,303.10  | 100.00% | 3 | 3 | 14 | 0.14% | 52.10% | YSALFL<br>GMAYG<br>AK                                      | 4.03 | 1,407.70 |
| Control | 6018 | PREDICTED: similar to ATP-binding cassette, sub-family B, member 7                                                                                                                                      | gi 194680502                                                                                                  | 83,040.70 | 100.00% | 3 | 3 | 3  | 0.03% | 9.43%  | ADNDAG<br>NAAIDSL<br>LNYETV<br>K                           | 3.33 | 2,094.00 |
| Control | 6018 | PREDICTED: similar to ATP-binding cassette, sub-family B, member 7                                                                                                                                      | gi 194680502                                                                                                  | 83,040.70 | 100.00% | 3 | 3 | 3  | 0.03% | 9.43%  | AVGVVP<br>QDAVLF<br>HNTIYY<br>NLLYGNI<br>SASPPEEV<br>YAVAK | 6.18 | 4,025.07 |

|         |      |                                                                        |                                      |           |         |   |    |    |       |        |                                                                  |      |          |
|---------|------|------------------------------------------------------------------------|--------------------------------------|-----------|---------|---|----|----|-------|--------|------------------------------------------------------------------|------|----------|
| Control | 6018 | PREDIC TED:<br>similar to ATP-binding cassette, sub-family B, member 7 | gi 194680502                         | 83,040.70 | 100.00% | 3 | 3  | 3  | 0.03% | 9.43%  | QALIDM<br>NTLFTLL<br>K                                           | 2.76 | 1,636.90 |
| Control | 6018 | DnaJ (Hsp40) homolog, subfamily 915 C, member 19                       | gi 73587098,gi 77735867,gi 83305915  | 12,481.10 | 99.80%  | 2 | 2  | 2  | 0.02% | 27.60% | EAALILG<br>VSPTAN<br>K                                           | 4.23 | 1,383.78 |
| Control | 6018 | DnaJ (Hsp40) homolog, subfamily 915 C, member 19                       | gi 73587098,gi 77735867,gi 83305915  | 12,481.10 | 99.80%  | 2 | 2  | 2  | 0.02% | 27.60% | IMLLNH<br>PDKGGS<br>PYIAAK                                       | 2.93 | 1,941.03 |
| Control | 6018 | P4HB protein                                                           | gi 148878430,gi 152941196            | 57,187.70 | 100.00% | 9 | 10 | 12 | 0.12% | 23.50% | FLESGG<br>QDGAGD<br>DDDLED<br>LEEAEPP<br>DLEEDD<br>DQK           | 4.1  | 3,739.49 |
| Control | 6018 | P4HB protein                                                           | gi 148878430,gi 152941196            | 57,187.70 | 100.00% | 9 | 10 | 12 | 0.12% | 23.50% | FLESGG<br>QDGAGD<br>DDDLED<br>LEEAEPP<br>DLEEDD<br>DQKAVK<br>DEL | 6.35 | 4,394.84 |
| Control | 6018 | P4HB protein                                                           | gi 148878430,gi 152941196            | 57,187.70 | 100.00% | 9 | 10 | 12 | 0.12% | 23.50% | GNFDEA<br>LAAHK                                                  | 3.2  | 1,172.57 |
| Control | 6018 | P4HB protein                                                           | gi 148878430,gi 152941196            | 57,187.70 | 100.00% | 9 | 10 | 12 | 0.12% | 23.50% | ILEFFGL<br>K                                                     | 2.52 | 966.566  |
| Control | 6018 | P4HB protein                                                           | gi 148878430,gi 152941196            | 57,187.70 | 100.00% | 9 | 10 | 12 | 0.12% | 23.50% | LITLEEE<br>MTK                                                   | 2.61 | 1,222.62 |
| Control | 6018 | P4HB protein                                                           | gi 148878430,gi 152941196            | 57,187.70 | 100.00% | 9 | 10 | 12 | 0.12% | 23.50% | NFEEVA<br>FDEKK                                                  | 3.09 | 1,355.65 |
| Control | 6018 | P4HB protein                                                           | gi 148878430,gi 152941196            | 57,187.70 | 100.00% | 9 | 10 | 12 | 0.12% | 23.50% | VDATEE<br>SDLAQQ<br>YGVR                                         | 2.78 | 1,780.83 |
| Control | 6018 | P4HB protein                                                           | gi 148878430,gi 152941196            | 57,187.70 | 100.00% | 9 | 10 | 12 | 0.12% | 23.50% | YKPESD<br>ELTAEK                                                 | 3.26 | 1,409.68 |
| Control | 6018 | P4HB protein                                                           | gi 148878430,gi 152941196            | 57,187.70 | 100.00% | 9 | 10 | 12 | 0.12% | 23.50% | YQLDKD<br>GVVLFK                                                 | 3.43 | 1,424.78 |
| Control | 6018 | RecName : Full=Ras-related protein Rab-11B                             | gi 108860922,gi 75773827,gi 78369332 | 24,471.00 | 100.00% | 5 | 5  | 7  | 0.07% | 25.70% | DHADSN<br>IVIMLVG<br>NK                                          | 3.56 | 1,641.83 |
| Control | 6018 | RecName : Full=Ras-related protein Rab-11B                             | gi 108860922,gi 75773827,gi 78369332 | 24,471.00 | 100.00% | 5 | 5  | 7  | 0.07% | 25.70% | GAVGAL<br>LVYDIA<br>K                                            | 3.69 | 1,289.75 |

|         |      |                                                                             |                                                                  |            |         |   |   |   |       |        |                                   |      |          |
|---------|------|-----------------------------------------------------------------------------|------------------------------------------------------------------|------------|---------|---|---|---|-------|--------|-----------------------------------|------|----------|
| Control | 6018 | RecName<br>:<br>Full=Ras-<br>related<br>protein<br>Rab-11B                  | gi 1088609<br>22,gi 75773<br>827,gi 7836<br>9332                 | 24,471.00  | 100.00% | 5 | 5 | 7 | 0.07% | 25.70% | HLTYEN<br>VER                     | 2.27 | 1,160.57 |
| Control | 6018 | RecName<br>:<br>Full=Ras-<br>related<br>protein<br>Rab-11B                  | gi 1088609<br>22,gi 75773<br>827,gi 7836<br>9332                 | 24,471.00  | 100.00% | 5 | 5 | 7 | 0.07% | 25.70% | NILTEIY<br>R                      | 2.39 | 1,021.57 |
| Control | 6018 | RecName<br>:<br>Full=Ras-<br>related<br>protein<br>Rab-11B                  | gi 1088609<br>22,gi 75773<br>827,gi 7836<br>9332                 | 24,471.00  | 100.00% | 5 | 5 | 7 | 0.07% | 25.70% | VVLIGDS<br>GVGK                   | 3.07 | 1,043.61 |
| Control | 6018 | SEPT11<br>protein                                                           | gi 1260108<br>11,gi 12672<br>3403,gi 162<br>416046               | 48,974.60  | 100.00% | 3 | 3 | 3 | 0.03% | 9.88%  | AAAQLL<br>QSQAQQ<br>SGAQQT<br>K   | 6.01 | 1,957.01 |
| Control | 6018 | SEPT11<br>protein                                                           | gi 1260108<br>11,gi 12672<br>3403,gi 162<br>416046               | 48,974.60  | 100.00% | 3 | 3 | 3 | 0.03% | 9.88%  | FESDPAT<br>HNEPGV<br>R            | 2.4  | 1,555.71 |
| Control | 6018 | SEPT11<br>protein                                                           | gi 1260108<br>11,gi 12672<br>3403,gi 162<br>416046               | 48,974.60  | 100.00% | 3 | 3 | 3 | 0.03% | 9.88%  | VNIPIIA<br>K                      | 1.91 | 980.6504 |
| Control | 6018 | translocas<br>e of inner<br>mitochon<br>drial<br>membran<br>e 50<br>homolog | gi 1106656<br>40,gi 74268<br>127,gi 7804<br>2512,gi 833<br>05921 | 40,747.80  | 100.00% | 4 | 4 | 5 | 0.05% | 15.00% | IPDEFDN<br>DPILVQQ<br>LR          | 4.71 | 1,911.98 |
| Control | 6018 | translocas<br>e of inner<br>mitochon<br>drial<br>membran<br>e 50<br>homolog | gi 1106656<br>40,gi 74268<br>127,gi 7804<br>2512,gi 833<br>05921 | 40,747.80  | 100.00% | 4 | 4 | 5 | 0.05% | 15.00% | QNLFFSS<br>LTSR                   | 2.32 | 1,299.67 |
| Control | 6018 | translocas<br>e of inner<br>mitochon<br>drial<br>membran<br>e 50<br>homolog | gi 1106656<br>40,gi 74268<br>127,gi 7804<br>2512,gi 833<br>05921 | 40,747.80  | 100.00% | 4 | 4 | 5 | 0.05% | 15.00% | TVLEHY<br>ALEEDP<br>LEAFK         | 4.33 | 2,004.00 |
| Control | 6018 | translocas<br>e of inner<br>mitochon<br>drial<br>membran<br>e 50<br>homolog | gi 1106656<br>40,gi 74268<br>127,gi 7804<br>2512,gi 833<br>05921 | 40,747.80  | 100.00% | 4 | 4 | 5 | 0.05% | 15.00% | VLLDLS<br>AFLK                    | 2.92 | 1,118.68 |
| Control | 6018 | CSE1L<br>protein                                                            | gi 1461868<br>77,gi 16444<br>8620,gi 193<br>806599               | 110,362.80 | 99.80%  | 2 | 2 | 2 | 0.02% | 4.53%  | FLESVEG<br>NQNYPL<br>LLLTLE<br>K  | 4.81 | 2,433.33 |
| Control | 6018 | CSE1L<br>protein                                                            | gi 1461868<br>77,gi 16444<br>8620,gi 193<br>806599               | 110,362.80 | 99.80%  | 2 | 2 | 2 | 0.02% | 4.53%  | SFLLQE<br>AIIPYPT<br>LITQLTQ<br>K | 3.55 | 2,617.49 |

|         |      |                                                                                                               |                                                                                                                                                                           |           |         |   |    |    |       |        |                           |      |          |
|---------|------|---------------------------------------------------------------------------------------------------------------|---------------------------------------------------------------------------------------------------------------------------------------------------------------------------|-----------|---------|---|----|----|-------|--------|---------------------------|------|----------|
| Control | 6018 | AFG3<br>ATPase<br>family<br>gene 3-<br>like 2                                                                 | gi 1140511<br>25,gi 11857<br>2819,gi 868<br>20707                                                                                                                         | 89,372.80 | 100.00% | 5 | 5  | 5  | 0.05% | 6.71%  | GLGYAQ<br>YLPR            | 3.49 | 1,137.61 |
| Control | 6018 | AFG3<br>ATPase<br>family<br>gene 3-<br>like 2                                                                 | gi 1140511<br>25,gi 11857<br>2819,gi 868<br>20707                                                                                                                         | 89,372.80 | 100.00% | 5 | 5  | 5  | 0.05% | 6.71%  | VALLLL<br>EK              | 2.16 | 898.5973 |
| Control | 6018 | AFG3<br>ATPase<br>family<br>gene 3-<br>like 2                                                                 | gi 1140511<br>25,gi 11857<br>2819,gi 868<br>20707                                                                                                                         | 89,372.80 | 100.00% | 5 | 5  | 5  | 0.05% | 6.71%  | VGQISFD<br>LPR            | 3.37 | 1,131.62 |
| Control | 6018 | AFG3<br>ATPase<br>family<br>gene 3-<br>like 2                                                                 | gi 1140511<br>25,gi 11857<br>2819,gi 868<br>20707                                                                                                                         | 89,372.80 | 100.00% | 5 | 5  | 5  | 0.05% | 6.71%  | VSEEIFF<br>GR             | 3.15 | 1,083.55 |
| Control | 6018 | AFG3<br>ATPase<br>family<br>gene 3-<br>like 2                                                                 | gi 1140511<br>25,gi 11857<br>2819,gi 868<br>20707                                                                                                                         | 89,372.80 | 100.00% | 5 | 5  | 5  | 0.05% | 6.71%  | VTQSAY<br>AQIVQF<br>GMNEK | 4.12 | 1,929.94 |
| Control | 6018 | ATP<br>synthase,<br>H+<br>transporti<br>ng,<br>mitochon<br>drial F1<br>complex,<br>gamma<br>polypepti<br>de 1 | gi 1154954<br>11,gi 15842<br>8988,gi 158<br>428995,gi 1<br>58429005,g<br>i 15842901<br>2,gi 158429<br>019,gi 1584<br>29026,gi 15<br>8431072,gi <br>543874,gi 7<br>4268047 | 30,124.50 | 100.00% | 8 | 11 | 27 | 0.26% | 49.30% | HLIIGVS<br>SDR            | 2.88 | 1,096.61 |
| Control | 6018 | ATP<br>synthase,<br>H+<br>transporti<br>ng,<br>mitochon<br>drial F1<br>complex,<br>gamma<br>polypepti<br>de 1 | gi 1154954<br>11,gi 15842<br>8988,gi 158<br>428995,gi 1<br>58429005,g<br>i 15842901<br>2,gi 158429<br>019,gi 1584<br>29026,gi 15<br>8431072,gi <br>543874,gi 7<br>4268047 | 30,124.50 | 100.00% | 8 | 11 | 27 | 0.26% | 49.30% | IIGVGDK<br>IR             | 2.83 | 970.6046 |
| Control | 6018 | ATP<br>synthase,<br>H+<br>transporti<br>ng,<br>mitochon<br>drial F1<br>complex,<br>gamma<br>polypepti<br>de 1 | gi 1154954<br>11,gi 15842<br>8988,gi 158<br>428995,gi 1<br>58429005,g<br>i 15842901<br>2,gi 158429<br>019,gi 1584<br>29026,gi 15<br>8431072,gi <br>543874,gi 7<br>4268047 | 30,124.50 | 100.00% | 8 | 11 | 27 | 0.26% | 49.30% | NASEMI<br>DKLTLT<br>FNR   | 3.71 | 1,768.89 |

|         |      |                                                                          |                                                                                                                                   |           |         |   |    |    |       |        |                                                 |      |          |
|---------|------|--------------------------------------------------------------------------|-----------------------------------------------------------------------------------------------------------------------------------|-----------|---------|---|----|----|-------|--------|-------------------------------------------------|------|----------|
| Control | 6018 | ATP synthase, H+ transport mitochondrial F1 complex, gamma polypeptide 1 | gi 115495411.gi 158428988.gi 158428995.gi 158429005.gi 158429012.gi 158429019.gi 158429026.gi 158431072.gi 15843874.gi 1584268047 | 30,124.50 | 100.00% | 8 | 11 | 27 | 0.26% | 49.30% | NYQEYS<br>LANIYY<br>SLK                         | 4.13 | 1,981.99 |
| Control | 6018 | ATP synthase, H+ transport mitochondrial F1 complex, gamma polypeptide 1 | gi 115495411.gi 158428988.gi 158428995.gi 158429005.gi 158429012.gi 158429019.gi 158429026.gi 158431072.gi 15843874.gi 1584268047 | 30,124.50 | 100.00% | 8 | 11 | 27 | 0.26% | 49.30% | RPPTFG<br>DASVIAL<br>ELLNSG<br>YEFDEG<br>SIIFNR | 6.89 | 3,427.72 |
| Control | 6018 | ATP synthase, H+ transport mitochondrial F1 complex, gamma polypeptide 1 | gi 115495411.gi 158428988.gi 158428995.gi 158429005.gi 158429012.gi 158429019.gi 158429026.gi 158431072.gi 15843874.gi 1584268047 | 30,124.50 | 100.00% | 8 | 11 | 27 | 0.26% | 49.30% | TEEKPIF<br>SLDTISS<br>AESMSIY<br>DDIDAD<br>VLR  | 5.7  | 3,376.60 |
| Control | 6018 | ATP synthase, H+ transport mitochondrial F1 complex, gamma polypeptide 1 | gi 115495411.gi 158428988.gi 158428995.gi 158429005.gi 158429012.gi 158429019.gi 158429026.gi 158431072.gi 15843874.gi 1584268047 | 30,124.50 | 100.00% | 8 | 11 | 27 | 0.26% | 49.30% | THSDQF<br>LVTFK                                 | 3.5  | 1,322.67 |
| Control | 6018 | ATP synthase, H+ transport mitochondrial F1 complex, gamma polypeptide 1 | gi 115495411.gi 158428988.gi 158428995.gi 158429005.gi 158429012.gi 158429019.gi 158429026.gi 158431072.gi 15843874.gi 1584268047 | 30,124.50 | 100.00% | 8 | 11 | 27 | 0.26% | 49.30% | VYGVGS<br>LALYEK                                | 4.83 | 1,298.70 |
| Control | 6018 | transgelin 2                                                             | gi 59858295.gi 61888874.gi 73919851                                                                                               | 22,408.90 | 100.00% | 3 | 4  | 6  | 0.06% | 18.60% | QMEQIS<br>QFLQAA<br>ER                          | 3.53 | 1,694.82 |





|         |      |                                                              |                                                              |           |         |   |   |   |       |        |                                  |          |
|---------|------|--------------------------------------------------------------|--------------------------------------------------------------|-----------|---------|---|---|---|-------|--------|----------------------------------|----------|
| Control | 6018 | PREDICTED: similar to transferrin receptor                   | gi 119879652                                                 | 85,420.40 | 100.00% | 4 | 4 | 5 | 0.05% | 6.89%  | VSASPLL 4.47<br>YSLIEK           | 1,419.81 |
| Control | 6018 | Heterogeneous nuclear ribonucleoprotein C (C1/C2)            | gi 74356361,gi 77735745                                      | 32,410.20 | 99.80%  | 2 | 2 | 2 | 0.02% | 9.18%  | GFAFVQ 3.45<br>YVNER             | 1,329.66 |
| Control | 6018 | Heterogeneous nuclear ribonucleoprotein C (C1/C2)            | gi 74356361,gi 77735745                                      | 32,410.20 | 99.80%  | 2 | 2 | 2 | 0.02% | 9.18%  | MIAGQV 4.33<br>LDINLAA<br>EPK    | 1,698.91 |
| Control | 6018 | Caveolin 2                                                   | gi 157279219,gi 38322700,gi 51512145,gi 56119130,gi 66774044 | 18,142.30 | 100.00% | 3 | 3 | 6 | 0.06% | 27.20% | ADVQLF 3.18<br>MDDDSY<br>SR      | 1,677.71 |
| Control | 6018 | Caveolin 2                                                   | gi 157279219,gi 38322700,gi 51512145,gi 56119130,gi 66774044 | 18,142.30 | 100.00% | 3 | 3 | 6 | 0.06% | 27.20% | SFSSVSL 3.77<br>QLSHD            | 1,306.63 |
| Control | 6018 | Caveolin 2                                                   | gi 157279219,gi 38322700,gi 51512145,gi 56119130,gi 66774044 | 18,142.30 | 100.00% | 3 | 3 | 6 | 0.06% | 27.20% | VG FEDVI 4.17<br>AEPVST<br>HSFDK | 1,976.96 |
| Control | 6018 | solute carrier family 29 (nucleoside transporters), member 1 | gi 110331885,gi 73587285,gi 77735743                         | 49,866.60 | 100.00% | 3 | 3 | 3 | 0.03% | 10.10% | DIQASAS 3.4<br>PLAPSPE<br>R      | 1,538.78 |
| Control | 6018 | solute carrier family 29 (nucleoside transporters), member 1 | gi 110331885,gi 73587285,gi 77735743                         | 49,866.60 | 100.00% | 3 | 3 | 3 | 0.03% | 10.10% | LAFVPLL 4.06<br>LLCNVQ<br>PR     | 1,696.00 |
| Control | 6018 | solute carrier family 29 (nucleoside transporters), member 1 | gi 110331885,gi 73587285,gi 77735743                         | 49,866.60 | 100.00% | 3 | 3 | 3 | 0.03% | 10.10% | LEGPGE 2.65<br>QETKLD<br>LISK    | 1,756.93 |

|         |      |                                             |                                                    |           |         |   |   |   |       |        |                             |      |          |
|---------|------|---------------------------------------------|----------------------------------------------------|-----------|---------|---|---|---|-------|--------|-----------------------------|------|----------|
| Control | 6018 | calcium binding protein P22                 | gi 115497570,gi 122142989,gi 152941188,gi 74354201 | 22,425.20 | 99.80%  | 2 | 2 | 3 | 0.03% | 13.80% | ASTLLR DEELEEI KK           | 3.01 | 1,773.96 |
| Control | 6018 | calcium binding protein P22                 | gi 115497570,gi 122142989,gi 152941188,gi 74354201 | 22,425.20 | 99.80%  | 2 | 2 | 3 | 0.03% | 13.80% | IPELAINP LGDR               | 3.7  | 1,307.73 |
| Control | 6018 | Chromosome 9 open reading frame 46 ortholog | gi 74354529,gi 77735799                            | 17,091.30 | 99.80%  | 2 | 2 | 4 | 0.04% | 15.60% | GMITFES LEK                 | 3.04 | 1,170.57 |
| Control | 6018 | Chromosome 9 open reading frame 46 ortholog | gi 74354529,gi 77735799                            | 17,091.30 | 99.80%  | 2 | 2 | 4 | 0.04% | 15.60% | MKGAEAE NILETEK             | 3.61 | 1,507.73 |
| Control | 6018 | STAT1 protein 44                            | gi 154426144                                       | 86,914.50 | 99.80%  | 2 | 2 | 2 | 0.02% | 3.35%  | ELSAVTF PDIIR               | 3.04 | 1,360.75 |
| Control | 6018 | STAT1 protein 44                            | gi 154426144                                       | 86,914.50 | 99.80%  | 2 | 2 | 2 | 0.02% | 3.35%  | VMAAEN IPENPLK              | 3.7  | 1,441.74 |
| Control | 6018 | non-classical MHC class I antigen           | gi 157785629,gi 83638606                           | 38,884.20 | 100.00% | 3 | 4 | 5 | 0.05% | 26.00% | DYLALN EDLR                 | 3.37 | 1,221.61 |
| Control | 6018 | non-classical MHC class I antigen           | gi 157785629,gi 83638606                           | 38,884.20 | 100.00% | 3 | 4 | 5 | 0.05% | 26.00% | FITVGYV DDTQFV R            | 3.22 | 1,659.84 |
| Control | 6018 | non-classical MHC class I antigen           | gi 157785629,gi 83638606                           | 38,884.20 | 100.00% | 3 | 4 | 5 | 0.05% | 26.00% | NGEDQT QDMELV ETRPSG DGTFAQ | 3.76 | 2,698.19 |
| Control | 6018 | non-classical MHC class I antigen           | gi 157785629,gi 83638606                           | 38,884.20 | 100.00% | 3 | 4 | 5 | 0.05% | 26.00% | SWTAAD TAAQIT K             | 4.35 | 1,363.69 |
| Control | 6018 | non-classical MHC class I antigen           | gi 157785629,gi 83638606                           | 38,884.20 | 100.00% | 3 | 4 | 5 | 0.05% | 26.00% | VQHEGL QEPLTLR              | 4.05 | 1,519.82 |
| Control | 6018 | non-classical MHC class I antigen           | gi 157785629,gi 83638606                           | 38,884.20 | 100.00% | 3 | 4 | 5 | 0.05% | 26.00% | YFLTAV SRPGLG EPR           | 3.29 | 1,662.90 |
| Control | 6018 | LOC539976 protein 4098                      | gi 133778097,gi 157074098                          | 83,155.80 | 99.80%  | 2 | 2 | 2 | 0.02% | 4.62%  | AVGFSS GTENPH GVK           | 2.4  | 1,486.73 |
| Control | 6018 | LOC539976 protein 4098                      | gi 133778097,gi 157074098                          | 83,155.80 | 99.80%  | 2 | 2 | 2 | 0.02% | 4.62%  | LYSEEQP QEAVPH LEAALR       | 3.37 | 2,180.10 |

|         |      |                                                                                                                                                                                                                                   |                                                               |           |         |   |   |   |       |        |                                |          |
|---------|------|-----------------------------------------------------------------------------------------------------------------------------------------------------------------------------------------------------------------------------------|---------------------------------------------------------------|-----------|---------|---|---|---|-------|--------|--------------------------------|----------|
| Control | 6018 | v-ral<br>simian<br>leukemia<br>viral<br>oncogene<br>homolog<br>B                                                                                                                                                                  | gi 1462317<br>22,gi 14790<br>0776,gi 148<br>878477            | 23,421.00 | 99.80%  | 2 | 2 | 2 | 0.02% | 13.60% | AEEDKIP 3.8<br>LLVVG<br>N<br>K | 1,524.86 |
| Control | 6018 | v-ral<br>simian<br>leukemia<br>viral<br>oncogene<br>homolog<br>B                                                                                                                                                                  | gi 1462317<br>22,gi 14790<br>0776,gi 148<br>878477            | 23,421.00 | 99.80%  | 2 | 2 | 2 | 0.02% | 13.60% | ANVDKV 4.93<br>FFDLMR          | 1,470.74 |
| Control | 6018 | v-ral<br>simian<br>leukemia<br>viral<br>oncogene<br>homolog<br>B                                                                                                                                                                  | gi 1462317<br>22,gi 14790<br>0776,gi 148<br>878477            | 23,421.00 | 99.80%  | 2 | 2 | 2 | 0.02% | 13.60% | VFFDLM 2.07<br>R               | 943.4707 |
| Control | 6018 | v-ral<br>simian<br>leukemia<br>viral<br>oncogene<br>homolog<br>B                                                                                                                                                                  | gi 1462317<br>22,gi 14790<br>0776,gi 148<br>878477            | 23,421.00 | 99.80%  | 2 | 2 | 2 | 0.02% | 13.60% | VKAEED 2.05<br>KIPLLV<br>GNK   | 1,752.03 |
| Control | 6018 | RecName<br>:<br>Full=Gua<br>nine<br>nucleotid<br>e-binding<br>protein<br>subunit<br>alpha-11;<br>Short=G-<br>protein<br>subunit<br>alpha-11;<br>Short=G<br>alpha-11;<br>AltName:<br>Full=G-<br>protein<br>subunit<br>GL2<br>alpha | gi 1169852,<br>gi 1337774<br>82,gi 21756<br>8,gi 278057<br>95 | 41,360.90 | 100.00% | 5 | 5 | 5 | 0.05% | 15.90% | DTILQLN 2.52<br>LK             | 1,057.63 |



|         |      |                                                                                                                                                                                                                                   |                                                                           |         |   |   |   |       |        |                                        |          |
|---------|------|-----------------------------------------------------------------------------------------------------------------------------------------------------------------------------------------------------------------------------------|---------------------------------------------------------------------------|---------|---|---|---|-------|--------|----------------------------------------|----------|
| Control | 6018 | RecName<br>:<br>Full=Gua<br>nine<br>nucleotid<br>e-binding<br>protein<br>subunit<br>alpha-11;<br>Short=G-<br>protein<br>subunit<br>alpha-11;<br>Short=G<br>alpha-11;<br>AltName:<br>Full=G-<br>protein<br>subunit<br>GL2<br>alpha | gi 1169852, 41,360.90<br>gi 1337774<br>82,gi 21756<br>8,gi 278057<br>95   | 100.00% | 5 | 5 | 5 | 0.05% | 15.90% | VPTTGII 5.19<br>EYPFDL<br>NIIFR        | 2,237.19 |
| Control | 6018 | RecName<br>:<br>Full=Gua<br>nine<br>nucleotid<br>e-binding<br>protein<br>subunit<br>alpha-11;<br>Short=G-<br>protein<br>subunit<br>alpha-11;<br>Short=G<br>alpha-11;<br>AltName:<br>Full=G-<br>protein<br>subunit<br>GL2<br>alpha | gi 1169852, 41,360.90<br>gi 1337774<br>82,gi 21756<br>8,gi 278057<br>95   | 100.00% | 5 | 5 | 5 | 0.05% | 15.90% | VRVPTT 5.22<br>GIIEYPF<br>DLENIIF<br>R | 2,492.36 |
| Control | 6018 | mitochon<br>drial<br>NADH:u<br>biquinon<br>e<br>oxidored<br>uctase<br>B16.6<br>subunit                                                                                                                                            | gi 1586461 16,655.90<br>6,gi 201390<br>62,gi 28603<br>804,gi 7426<br>8330 | 100.00% | 4 | 5 | 7 | 0.07% | 26.40% | IALMPLL 2.87<br>QAEEK                  | 1,242.71 |
| Control | 6018 | mitochon<br>drial<br>NADH:u<br>biquinon<br>e<br>oxidored<br>uctase<br>B16.6<br>subunit                                                                                                                                            | gi 1586461 16,655.90<br>6,gi 201390<br>62,gi 28603<br>804,gi 7426<br>8330 | 100.00% | 4 | 5 | 7 | 0.07% | 26.40% | LQIEDFE 2.91<br>AR                     | 1,120.56 |

|         |      |                                                            |                                                                 |           |         |    |    |    |       |        |                                                          |          |
|---------|------|------------------------------------------------------------|-----------------------------------------------------------------|-----------|---------|----|----|----|-------|--------|----------------------------------------------------------|----------|
| Control | 6018 | mitochondrial NADH:ubiquinone oxidoreductase B16.6 subunit | gi 15864616,gi 20139062,gi 28603804,gi 74268330                 | 16,655.90 | 100.00% | 4  | 5  | 7  | 0.07% | 26.40% | VKQDMP 3.84<br>PVGGYG<br>PIDYK                           | 1,879.93 |
| Control | 6018 | mitochondrial NADH:ubiquinone oxidoreductase B16.6 subunit | gi 15864616,gi 20139062,gi 28603804,gi 74268330                 | 16,655.90 | 100.00% | 4  | 5  | 7  | 0.07% | 26.40% | VKQDMP 5.22<br>PVGGYG<br>PIDYKR                          | 2,036.03 |
| Control | 6018 | basigin                                                    | gi 115496127,gi 120419551,gi 154425710,gi 156713141,gi 73587049 | 29,754.80 | 100.00% | 5  | 6  | 8  | 0.08% | 21.80% | FFVVSSE 3.07<br>SR                                       | 1,057.53 |
| Control | 6018 | basigin                                                    | gi 115496127,gi 120419551,gi 154425710,gi 156713141,gi 73587049 | 29,754.80 | 100.00% | 5  | 6  | 8  | 0.08% | 21.80% | RKPDEV 4.62<br>LDDEDI<br>GSAPLK                          | 1,997.02 |
| Control | 6018 | basigin                                                    | gi 115496127,gi 120419551,gi 154425710,gi 156713141,gi 73587049 | 29,754.80 | 100.00% | 5  | 6  | 8  | 0.08% | 21.80% | TELHIPN 2.94<br>VDLK                                     | 1,278.71 |
| Control | 6018 | basigin                                                    | gi 115496127,gi 120419551,gi 154425710,gi 156713141,gi 73587049 | 29,754.80 | 100.00% | 5  | 6  | 8  | 0.08% | 21.80% | VLKEDA 2.77<br>LPDLK                                     | 1,240.72 |
| Control | 6018 | basigin                                                    | gi 115496127,gi 120419551,gi 154425710,gi 156713141,gi 73587049 | 29,754.80 | 100.00% | 5  | 6  | 8  | 0.08% | 21.80% | VLKEDA 5.67<br>LPDLKT<br>EYEVDS<br>EDR                   | 2,464.21 |
| Control | 6018 | Tubulin, beta 2C                                           | gi 75773583,gi 77736271                                         | 49,812.70 | 100.00% | 12 | 13 | 19 | 0.19% | 42.90% | ALTVPE 3.39<br>LTQQMF<br>DAK                             | 1,707.86 |
| Control | 6018 | Tubulin, beta 2C                                           | gi 75773583,gi 77736271                                         | 49,812.70 | 100.00% | 12 | 13 | 19 | 0.19% | 42.90% | AVLVDL 3.78<br>EPGTMD<br>SVR                             | 1,617.82 |
| Control | 6018 | Tubulin, beta 2C                                           | gi 75773583,gi 77736271                                         | 49,812.70 | 100.00% | 12 | 13 | 19 | 0.19% | 42.90% | EAESCD 3.11<br>CLQGFQ<br>LTHSLG<br>GGTGSG<br>MGTLIS<br>K | 3,213.49 |
| Control | 6018 | Tubulin, beta 2C                                           | gi 75773583,gi 77736271                                         | 49,812.70 | 100.00% | 12 | 13 | 19 | 0.19% | 42.90% | EVDEQM 2.76<br>LNVQNK                                    | 1,462.68 |

|         |      |                                                                                                                                                                             |                                                            |           |         |    |    |    |       |        |                                                                     |          |
|---------|------|-----------------------------------------------------------------------------------------------------------------------------------------------------------------------------|------------------------------------------------------------|-----------|---------|----|----|----|-------|--------|---------------------------------------------------------------------|----------|
| Control | 6018 | Tubulin, beta 2C                                                                                                                                                            | gi 75773583,gi 77736271                                    | 49,812.70 | 100.00% | 12 | 13 | 19 | 0.19% | 42.90% | GHYTEG 4.4<br>AELVDS<br>VLDVVR                                      | 1,958.98 |
| Control | 6018 | Tubulin, beta 2C                                                                                                                                                            | gi 75773583,gi 77736271                                    | 49,812.70 | 100.00% | 12 | 13 | 19 | 0.19% | 42.90% | GHYTEG 3.51<br>AELVDS<br>VLDVVR                                     | 2,087.08 |
| Control | 6018 | Tubulin, beta 2C                                                                                                                                                            | gi 75773583,gi 77736271                                    | 49,812.70 | 100.00% | 12 | 13 | 19 | 0.19% | 42.90% | K<br>IMNTFSV 4.35<br>VSPK                                           | 1,335.70 |
| Control | 6018 | Tubulin, beta 2C                                                                                                                                                            | gi 75773583,gi 77736271                                    | 49,812.70 | 100.00% | 12 | 13 | 19 | 0.19% | 42.90% | LAVNMV 3.83<br>PFPR                                                 | 1,159.63 |
| Control | 6018 | Tubulin, beta 2C                                                                                                                                                            | gi 75773583,gi 77736271                                    | 49,812.70 | 100.00% | 12 | 13 | 19 | 0.19% | 42.90% | LHFFMP 4.05<br>GFAPLTS<br>R                                         | 1,636.83 |
| Control | 6018 | Tubulin, beta 2C                                                                                                                                                            | gi 75773583,gi 77736271                                    | 49,812.70 | 100.00% | 12 | 13 | 19 | 0.19% | 42.90% | NSSYFV 2.39<br>EWIPNN<br>VK                                         | 1,696.83 |
| Control | 6018 | Tubulin, beta 2C                                                                                                                                                            | gi 75773583,gi 77736271                                    | 49,812.70 | 100.00% | 12 | 13 | 19 | 0.19% | 42.90% | VSDTVV 4.6<br>EPYNAT<br>LSVHQL<br>VENTDE<br>TYCIDNE<br>ALYDICF<br>R | 4,479.06 |
| Control | 6018 | Tubulin, beta 2C                                                                                                                                                            | gi 75773583,gi 77736271                                    | 49,812.70 | 100.00% | 12 | 13 | 19 | 0.19% | 42.90% | YLTVAA 2.73<br>VFR                                                  | 1,039.59 |
| Control | 6018 | RAN binding protein 6                                                                                                                                                       | gi 78174362,gi 83715972                                    | 47,285.80 | 99.80%  | 2  | 2  | 2  | 0.02% | 6.16%  | KQAEET 3.05<br>YENIPGQ<br>SK                                        | 1,721.83 |
| Control | 6018 | RAN binding protein 6                                                                                                                                                       | gi 78174362,gi 83715972                                    | 47,285.80 | 99.80%  | 2  | 2  | 2  | 0.02% | 6.16%  | SLVEIAD 3.72<br>TVPK                                                | 1,171.66 |
| Control | 6018 | RecName : Full=Peptidyl-prolyl cis-trans isomerase B; Short=PP1ase; Short=Rotamase; AltName: Full=Cyclophilin B; AltName: Full=S-cyclophilin; Short=SCYLP; Flags: Precursor | gi 215274238,gi 27806469,gi 529242,gi 59858297,gi 74268324 | 23,726.00 | 100.00% | 3  | 3  | 3  | 0.03% | 18.10% | IEVEKPF 2.95<br>AIAKE                                               | 1,373.77 |





|         |      |                                                                                                                                                                   |                      |         |   |   |   |       |        |                                     |      |          |
|---------|------|-------------------------------------------------------------------------------------------------------------------------------------------------------------------|----------------------|---------|---|---|---|-------|--------|-------------------------------------|------|----------|
| Control | 6018 | RecName gi 1162485 : 78,gi 74268 Full=GPI 100,gi 7773 transamid 5383 ase compone nt PIG-S; AltName: Full=Phosphatidylinositol-glycan biosynthesis class S protein | 61,769.20            | 100.00% | 3 | 3 | 3 | 0.03% | 11.90% | APLPYS QISGLNS LK                   | 3.84 | 1,587.87 |
| Control | 6018 | RecName gi 1162485 : 78,gi 74268 Full=GPI 100,gi 7773 transamid 5383 ase compone nt PIG-S; AltName: Full=Phosphatidylinositol-glycan biosynthesis class S protein | 61,769.20            | 100.00% | 3 | 3 | 3 | 0.03% | 11.90% | LMVPVT VVFTQE SVPLDD QEKL PFT VVHER | 4.22 | 3,468.81 |
| Control | 6018 | RecName gi 1162485 : 78,gi 74268 Full=GPI 100,gi 7773 transamid 5383 ase compone nt PIG-S; AltName: Full=Phosphatidylinositol-glycan biosynthesis class S protein | 61,769.20            | 100.00% | 3 | 3 | 3 | 0.03% | 11.90% | SVENLA TATTTL TSLAQL LGK            | 3.14 | 2,132.18 |
| Control | 6018 | PREDICTED: phosphoenolpyruvate carboxylase 2 (mitochondrial) isoform 1                                                                                            | gi 1946703 70,632.70 | 100.00% | 3 | 3 | 3 | 0.03% | 5.78%  | EVLAELEALEGR                        | 2.37 | 1,328.71 |

|         |      |                                                                                                                                                                                                               |            |           |         |   |   |   |       |        |                             |      |          |
|---------|------|---------------------------------------------------------------------------------------------------------------------------------------------------------------------------------------------------------------|------------|-----------|---------|---|---|---|-------|--------|-----------------------------|------|----------|
| Control | 6018 | PREDIC TED: 61<br>phosphoenolpyruvate carboxylase 2 (mitochondrial) isoform 1                                                                                                                                 | gi 1946703 | 70,632.70 | 100.00% | 3 | 3 | 3 | 0.03% | 5.78%  | SYLTEQ<br>VNQDLP<br>K       | 4.26 | 1,534.77 |
| Control | 6018 | PREDIC TED: 61<br>phosphoenolpyruvate carboxylase 2 (mitochondrial) isoform 1                                                                                                                                 | gi 1946703 | 70,632.70 | 100.00% | 3 | 3 | 3 | 0.03% | 5.78%  | VLSGDL<br>GQLPAK            | 2.54 | 1,197.68 |
| Control | 6018 | PREDIC TED: 22<br>similar to 1-acylglycerophosphocholine O-acyltransferase 1 (Lung-type acyl-CoA:lysophosphatidylcholine acyltransferase 1) (Lysosphatidylcholine acyltransferase 1) (Acyltransferase-like 2) | gi 1946764 | 54,069.40 | 99.80%  | 2 | 2 | 2 | 0.02% | 11.50% | MFGSQD<br>GSVEEH<br>ALSSILK | 3.11 | 2,050.98 |

|         |      |                                                                                                                                                                                                               |            |            |        |   |   |   |       |        |                                                                |          |
|---------|------|---------------------------------------------------------------------------------------------------------------------------------------------------------------------------------------------------------------|------------|------------|--------|---|---|---|-------|--------|----------------------------------------------------------------|----------|
| Control | 6018 | PREDIC TED: 22<br>similar to 1-acylglycerophosphocholine O-acyltransferase 1 (Lung-type acyl-CoA:lysophosphatidylcholine acyltransferase 1) (Lysosphatidylcholine acyltransferase 1) (Acyltransferase-like 2) | gi 1946764 | 54,069.40  | 99.80% | 2 | 2 | 2 | 0.02% | 11.50% | RVTLPEF 4.13<br>AAQLGV<br>PESESLE<br>DLFSLFD<br>EGGGGE<br>VDLR | 3,978.96 |
| Control | 6018 | PREDIC TED: 29<br>similar to Solute carrier family 12 member 7 (Electroneutral potassium-chloride cotransporter 4) (K-Cl cotransporter 4)                                                                     | gi 1946764 | 128,599.80 | 99.80% | 2 | 2 | 2 | 0.02% | 3.11%  | LANYTN 3.73<br>LSQGVV<br>EHEEAE<br>DSR                         | 2,361.10 |
| Control | 6018 | PREDIC TED: 29<br>similar to Solute carrier family 12 member 7 (Electroneutral potassium-chloride cotransporter 4) (K-Cl cotransporter 4)                                                                     | gi 1946764 | 128,599.80 | 99.80% | 2 | 2 | 2 | 0.02% | 3.11%  | SQDAQL 3.44<br>VLLNMP<br>GPPK                                  | 1,723.91 |
| Control | 6018 | YWHAG protein<br>gi 1572794<br>00,gi 15774<br>4500,gi 285<br>2385,gi 711<br>53781                                                                                                                             | gi 1572794 | 28,235.10  | 99.80% | 2 | 2 | 3 | 0.03% | 17.40% | NVTELN 4.13<br>EPLSNEE<br>R                                    | 1,643.79 |

|         |      |                                                                          |                                                                                                                                    |            |         |   |   |   |       |        |                                               |          |
|---------|------|--------------------------------------------------------------------------|------------------------------------------------------------------------------------------------------------------------------------|------------|---------|---|---|---|-------|--------|-----------------------------------------------|----------|
| Control | 6018 | YWHAG protein                                                            | gi 157279400,gi 157744500,gi 2852385,gi 71153781                                                                                   | 28,235.10  | 99.80%  | 2 | 2 | 3 | 0.03% | 17.40% | TAFDDAI 4.43                                  | 3,317.61 |
| Control | 6018 | Chain C, Subcomp lex Of The Stator Of Bovine Mitochon drial Atp Synthase | gi 110591028,gi 110591031,gi 114687,gi 163036,gi 27807291,gi 55670489,gi 73586602                                                  | 12,514.70  | 99.80%  | 2 | 2 | 2 | 0.02% | 22.20% | QTSGGP 3.24<br>VDAGPE<br>YQQDL<br>RELFK       | 2,550.21 |
| Control | 6018 | Chain C, Subcomp lex Of The Stator Of Bovine Mitochon drial Atp Synthase | gi 110591028,gi 110591031,gi 114687,gi 163036,gi 27807291,gi 55670489,gi 73586602                                                  | 12,514.70  | 99.80%  | 2 | 2 | 2 | 0.02% | 22.20% | RQTSGG 6.55<br>PVDAGP<br>EYQQDL<br>DRELFK     | 2,706.31 |
| Control | 6018 | heterogenous nuclear ribonucleoprotein A2/B1                             | gi 114051756,gi 122145945,gi 87578315                                                                                              | 35,988.50  | 99.80%  | 2 | 3 | 3 | 0.03% | 13.20% | GFGFVT 2.57<br>FDDHDP<br>VDKIVL<br>QK         | 2,277.16 |
| Control | 6018 | heterogenous nuclear ribonucleoprotein A2/B1                             | gi 114051756,gi 122145945,gi 87578315                                                                                              | 35,988.50  | 99.80%  | 2 | 3 | 3 | 0.03% | 13.20% | NMGGPY 5.4<br>GGGNYG<br>PGGSGG<br>SGGYGG<br>R | 2,205.90 |
| Control | 6018 | RecName : Full=Clat hrin heavy chain 1                                   | gi 1705915,gi 27806689,gi 56554548,gi 56554549,gi 56554550,gi 56554551,gi 56554552,gi 56554553,gi 56554554,gi 56554555,gi 56554556 | 186,919.60 | 100.00% | 7 | 8 | 8 | 0.08% | 6.38%  | ALEHFT 4.69<br>DLYDIK<br>R                    | 1,620.84 |
| Control | 6018 | RecName : Full=Clat hrin heavy chain 1                                   | gi 1705915,gi 27806689,gi 56554548,gi 56554549,gi 56554550,gi 56554551,gi 56554552,gi 56554553,gi 56554554,gi 56554555,gi 56554556 | 186,919.60 | 100.00% | 7 | 8 | 8 | 0.08% | 6.38%  | KFDVNT 6.65<br>SAVQVLI<br>EHIGNL<br>DR        | 2,368.26 |

|         |      |                                                       |                                                                                                                                                                                    |            |         |   |   |   |       |       |                                         |          |
|---------|------|-------------------------------------------------------|------------------------------------------------------------------------------------------------------------------------------------------------------------------------------------|------------|---------|---|---|---|-------|-------|-----------------------------------------|----------|
| Control | 6018 | RecName<br>:<br>Full=Clat<br>hrin<br>heavy<br>chain 1 | gi 1705915,<br>gi 2780668<br>9,gi 565545<br>48,gi 56554<br>549,gi 5655<br>4550,gi 565<br>54551,gi 56<br>554552,gi 5<br>6554553,gi <br>56554554,g<br>i 56554555,<br>gi 5655455<br>6 | 186,919.60 | 100.00% | 7 | 8 | 8 | 0.08% | 6.38% | LAELEEF 3.87<br>INGPNN<br>AHIQVQ<br>GDR | 2,464.22 |
| Control | 6018 | RecName<br>:<br>Full=Clat<br>hrin<br>heavy<br>chain 1 | gi 1705915,<br>gi 2780668<br>9,gi 565545<br>48,gi 56554<br>549,gi 5655<br>4550,gi 565<br>54551,gi 56<br>554552,gi 5<br>6554553,gi <br>56554554,g<br>i 56554555,<br>gi 5655455<br>6 | 186,919.60 | 100.00% | 7 | 8 | 8 | 0.08% | 6.38% | LLYNNV 2.35<br>SNFGR                    | 1,296.67 |
| Control | 6018 | RecName<br>:<br>Full=Clat<br>hrin<br>heavy<br>chain 1 | gi 1705915,<br>gi 2780668<br>9,gi 565545<br>48,gi 56554<br>549,gi 5655<br>4550,gi 565<br>54551,gi 56<br>554552,gi 5<br>6554553,gi <br>56554554,g<br>i 56554555,<br>gi 5655455<br>6 | 186,919.60 | 100.00% | 7 | 8 | 8 | 0.08% | 6.38% | NNLAGA 3.54<br>EELFAR                   | 1,304.66 |
| Control | 6018 | RecName<br>:<br>Full=Clat<br>hrin<br>heavy<br>chain 1 | gi 1705915,<br>gi 2780668<br>9,gi 565545<br>48,gi 56554<br>549,gi 5655<br>4550,gi 565<br>54551,gi 56<br>554552,gi 5<br>6554553,gi <br>56554554,g<br>i 56554555,<br>gi 5655455<br>6 | 186,919.60 | 100.00% | 7 | 8 | 8 | 0.08% | 6.38% | RPISADS 3.89<br>AIMNPA<br>SK            | 1,573.80 |
| Control | 6018 | RecName<br>:<br>Full=Clat<br>hrin<br>heavy<br>chain 1 | gi 1705915,<br>gi 2780668<br>9,gi 565545<br>48,gi 56554<br>549,gi 5655<br>4550,gi 565<br>54551,gi 56<br>554552,gi 5<br>6554553,gi <br>56554554,g<br>i 56554555,<br>gi 5655455<br>6 | 186,919.60 | 100.00% | 7 | 8 | 8 | 0.08% | 6.38% | TLQIFNI 2.73<br>EMK                     | 1,252.66 |

|         |      |                                                                  |                                                     |           |         |   |   |   |       |        |                           |      |          |
|---------|------|------------------------------------------------------------------|-----------------------------------------------------|-----------|---------|---|---|---|-------|--------|---------------------------|------|----------|
| Control | 6018 | coiled-coil domain containin g 47                                | gi 146231852,gi 73586661,gi 78369308,gi 97045772    | 55,725.10 | 99.80%  | 2 | 2 | 2 | 0.02% | 5.59%  | RQDLLN VLAR               | 3.41 | 1,197.71 |
| Control | 6018 | coiled-coil domain containin g 47                                | gi 146231852,gi 73586661,gi 78369308,gi 97045772    | 55,725.10 | 99.80%  | 2 | 2 | 2 | 0.02% | 5.59%  | TLLFTFN VPGSGN TYPK       | 3.59 | 1,855.96 |
| Control | 6018 | hydroxysteroid (17-beta) dehydrogenase 11                        | gi 114052807,gi 86438493                            | 35,077.20 | 100.00% | 3 | 4 | 7 | 0.07% | 13.90% | FDAVIG YK                 | 2.41 | 912.4826 |
| Control | 6018 | hydroxysteroid (17-beta) dehydrogenase 11                        | gi 114052807,gi 86438493                            | 35,077.20 | 100.00% | 3 | 4 | 7 | 0.07% | 13.90% | NPSTSLG PTLEPEE VVNK      | 5.52 | 1,910.97 |
| Control | 6018 | hydroxysteroid (17-beta) dehydrogenase 11                        | gi 114052807,gi 86438493                            | 35,077.20 | 100.00% | 3 | 4 | 7 | 0.07% | 13.90% | SVTGEIV LITGAG HGIGR      | 4.41 | 1,736.97 |
| Control | 6018 | pre-B-cell leukemia transcript ion factor interactin g protein 1 | gi 110331795,gi 115497324,gi 151554897,gi 158706093 | 80,239.50 | 100.00% | 3 | 3 | 3 | 0.03% | 6.19%  | ALESEL QQLR               | 2.69 | 1,186.64 |
| Control | 6018 | pre-B-cell leukemia transcript ion factor interactin g protein 1 | gi 110331795,gi 115497324,gi 151554897,gi 158706093 | 80,239.50 | 100.00% | 3 | 3 | 3 | 0.03% | 6.19%  | EQGPTG QEPPSPGF LEQK      | 4.14 | 1,828.87 |
| Control | 6018 | pre-B-cell leukemia transcript ion factor interactin g protein 1 | gi 110331795,gi 115497324,gi 151554897,gi 158706093 | 80,239.50 | 100.00% | 3 | 3 | 3 | 0.03% | 6.19%  | LLQAQL QAQKEE LQSLMR      | 4.57 | 2,143.15 |
| Control | 6018 | Ribosomal protein S3                                             | gi 74268226,gi 77404290,gi 91207641                 | 26,670.50 | 100.00% | 5 | 5 | 5 | 0.05% | 28.80% | AELNEFL TR                | 2.77 | 1,092.57 |
| Control | 6018 | Ribosomal protein S3                                             | gi 74268226,gi 77404290,gi 91207641                 | 26,670.50 | 100.00% | 5 | 5 | 5 | 0.05% | 28.80% | DEILPTT PISEQK            | 2.58 | 1,470.77 |
| Control | 6018 | Ribosomal protein S3                                             | gi 74268226,gi 77404290,gi 91207641                 | 26,670.50 | 100.00% | 5 | 5 | 5 | 0.05% | 28.80% | FVDGLM IHSGDPV NYVVDT AVR | 5.64 | 2,484.19 |
| Control | 6018 | Ribosomal protein S3                                             | gi 74268226,gi 77404290,gi 91207641                 | 26,670.50 | 100.00% | 5 | 5 | 5 | 0.05% | 28.80% | GGKPEP PAMPQP VPTA        | 2.52 | 1,589.80 |

|         |      |                                                           |                                     |           |         |   |    |    |       |        |                            |      |          |
|---------|------|-----------------------------------------------------------|-------------------------------------|-----------|---------|---|----|----|-------|--------|----------------------------|------|----------|
| Control | 6018 | Ribosomal protein S3                                      | gi 74268226,gi 77404290,gi 91207641 | 26,670.50 | 100.00% | 5 | 5  | 5  | 0.05% | 28.80% | IRELTAV VQK                | 2.94 | 1,156.70 |
| Control | 6018 | Leucine zipper-EF hand containing transmembrane protein 1 | gi 111308604,gi 115497920           | 81,801.70 | 100.00% | 7 | 10 | 14 | 0.14% | 15.20% | ADDKLI AEEGVD SLNVK        | 4.95 | 1,815.93 |
| Control | 6018 | Leucine zipper-EF hand containing transmembrane protein 1 | gi 111308604,gi 115497920           | 81,801.70 | 100.00% | 7 | 10 | 14 | 0.14% | 15.20% | FLQDTIE EMALK              | 4.1  | 1,453.72 |
| Control | 6018 | Leucine zipper-EF hand containing transmembrane protein 1 | gi 111308604,gi 115497920           | 81,801.70 | 100.00% | 7 | 10 | 14 | 0.14% | 15.20% | IRETGER PSNEEIM R          | 1.93 | 1,832.89 |
| Control | 6018 | Leucine zipper-EF hand containing transmembrane protein 1 | gi 111308604,gi 115497920           | 81,801.70 | 100.00% | 7 | 10 | 14 | 0.14% | 15.20% | KLEEGG PVYSPP AQAAVR       | 6.2  | 1,868.99 |
| Control | 6018 | Leucine zipper-EF hand containing transmembrane protein 1 | gi 111308604,gi 115497920           | 81,801.70 | 100.00% | 7 | 10 | 14 | 0.14% | 15.20% | LLELQSI GTNNFL R           | 5.26 | 1,617.90 |
| Control | 6018 | Leucine zipper-EF hand containing transmembrane protein 1 | gi 111308604,gi 115497920           | 81,801.70 | 100.00% | 7 | 10 | 14 | 0.14% | 15.20% | LLSLASA LDDNKD GKVDID DLVK | 3.47 | 2,457.31 |
| Control | 6018 | Leucine zipper-EF hand containing transmembrane protein 1 | gi 111308604,gi 115497920           | 81,801.70 | 100.00% | 7 | 10 | 14 | 0.14% | 15.20% | STLQTLP EIVAK              | 2.47 | 1,299.75 |
| Control | 6018 | voltage-dependent anion channel 1                         | gi 88102203,gi 90111863             | 30,723.80 | 100.00% | 9 | 10 | 56 | 0.55% | 37.80% | GYGFGLI K                  | 2.02 | 854.4772 |
| Control | 6018 | voltage-dependent anion channel 1                         | gi 88102203,gi 90111863             | 30,723.80 | 100.00% | 9 | 10 | 56 | 0.55% | 37.80% | LTFDSSF SPNTGK             | 4.32 | 1,400.67 |



|         |      |                                              |                                                                                               |           |         |   |    |    |       |        |                                          |          |
|---------|------|----------------------------------------------|-----------------------------------------------------------------------------------------------|-----------|---------|---|----|----|-------|--------|------------------------------------------|----------|
| Control | 6018 | voltage-<br>dependen<br>t anion<br>channel 1 | gi 8810220,<br>gi 9011186<br>3                                                                | 30,723.80 | 100.00% | 9 | 10 | 56 | 0.55% | 37.80% | LTFDSSF 3.83<br>SPNTGK<br>K              | 1,528.76 |
| Control | 6018 | voltage-<br>dependen<br>t anion<br>channel 1 | gi 8810220,<br>gi 9011186<br>3                                                                | 30,723.80 | 100.00% | 9 | 10 | 56 | 0.55% | 37.80% | LTLSALL 3.22<br>DGK                      | 1,030.61 |
| Control | 6018 | voltage-<br>dependen<br>t anion<br>channel 1 | gi 8810220,<br>gi 9011186<br>3                                                                | 30,723.80 | 100.00% | 9 | 10 | 56 | 0.55% | 37.80% | SENGLEF 4.59<br>TSSGSA<br>NTETTK         | 1,959.88 |
| Control | 6018 | voltage-<br>dependen<br>t anion<br>channel 1 | gi 8810220,<br>gi 9011186<br>3                                                                | 30,723.80 | 100.00% | 9 | 10 | 56 | 0.55% | 37.80% | TDEFQL 5.94<br>HTNVND<br>GTEFGG<br>SIYQK | 2,600.19 |
| Control | 6018 | voltage-<br>dependen<br>t anion<br>channel 1 | gi 8810220,<br>gi 9011186<br>3                                                                | 30,723.80 | 100.00% | 9 | 10 | 56 | 0.55% | 37.80% | TKSENG 4.64<br>LEFTSSG<br>SANTET<br>TK   | 2,189.02 |
| Control | 6018 | voltage-<br>dependen<br>t anion<br>channel 1 | gi 8810220,<br>gi 9011186<br>3                                                                | 30,723.80 | 100.00% | 9 | 10 | 56 | 0.55% | 37.80% | VNSSLI 6<br>GLGYTQ<br>TLKPGIK            | 2,103.18 |
| Control | 6018 | voltage-<br>dependen<br>t anion<br>channel 1 | gi 8810220,<br>gi 9011186<br>3                                                                | 30,723.80 | 100.00% | 9 | 10 | 56 | 0.55% | 37.80% | VTQSNF 3.94<br>AVGYK                     | 1,213.62 |
| Control | 6018 | voltage-<br>dependen<br>t anion<br>channel 2 | gi 5985840<br>1,gi 621771<br>48,gi 73586<br>695,gi 8574<br>295,gi 8810<br>222,gi 9011<br>1864 | 31,602.50 | 100.00% | 7 | 9  | 25 | 0.24% | 29.60% | GFGFGL 2.01<br>VK                        | 824.4666 |
| Control | 6018 | voltage-<br>dependen<br>t anion<br>channel 2 | gi 5985840<br>1,gi 621771<br>48,gi 73586<br>695,gi 8574<br>295,gi 8810<br>222,gi 9011<br>1864 | 31,602.50 | 100.00% | 7 | 9  | 25 | 0.24% | 29.60% | LTFDITF 3.64<br>SPNTGK                   | 1,428.70 |
| Control | 6018 | voltage-<br>dependen<br>t anion<br>channel 2 | gi 5985840<br>1,gi 621771<br>48,gi 73586<br>695,gi 8574<br>295,gi 8810<br>222,gi 9011<br>1864 | 31,602.50 | 100.00% | 7 | 9  | 25 | 0.24% | 29.60% | LTFDITF 3.68<br>SPNTGK<br>K              | 1,556.80 |
| Control | 6018 | voltage-<br>dependen<br>t anion<br>channel 2 | gi 5985840<br>1,gi 621771<br>48,gi 73586<br>695,gi 8574<br>295,gi 8810<br>222,gi 9011<br>1864 | 31,602.50 | 100.00% | 7 | 9  | 25 | 0.24% | 29.60% | LTLSAL 3.59<br>VDGK                      | 1,016.60 |
| Control | 6018 | voltage-<br>dependen<br>t anion<br>channel 2 | gi 5985840<br>1,gi 621771<br>48,gi 73586<br>695,gi 8574<br>295,gi 8810<br>222,gi 9011<br>1864 | 31,602.50 | 100.00% | 7 | 9  | 25 | 0.24% | 29.60% | TGDFQL 4.59<br>HTNVND<br>GTEFGG<br>SIYQK | 2,528.17 |
| Control | 6018 | voltage-<br>dependen<br>t anion<br>channel 2 | gi 5985840<br>1,gi 621771<br>48,gi 73586<br>695,gi 8574<br>295,gi 8810<br>222,gi 9011<br>1864 | 31,602.50 | 100.00% | 7 | 9  | 25 | 0.24% | 29.60% | VNSSLI 5.16<br>GVGYTQ<br>TLRPGV<br>K     | 2,103.16 |

|         |      |                                          |                                                                         |           |         |   |   |    |       |        |                             |      |          |
|---------|------|------------------------------------------|-------------------------------------------------------------------------|-----------|---------|---|---|----|-------|--------|-----------------------------|------|----------|
| Control | 6018 | voltage-dependent anion channel 2        | gi 59858401,gi 62177148,gi 73586695,gi 8810222,gi 9011864               | 31,602.50 | 100.00% | 7 | 9 | 25 | 0.24% | 29.60% | YQLDPT ASISAK               | 3.46 | 1,293.67 |
| Control | 6018 | Trx-like protein                         | gi 109726696,gi 115494922,gi 122145628,gi 126920889,gi 146231808        | 31,563.90 | 100.00% | 4 | 4 | 4  | 0.04% | 8.63%  | KLLPESS QPLK                | 2.72 | 1,239.73 |
| Control | 6018 | Trx-like protein                         | gi 109726696,gi 115494922,gi 122145628,gi 126920889,gi 146231808        | 31,563.90 | 100.00% | 4 | 4 | 4  | 0.04% | 8.63%  | KLLPESS QPLKK               | 3.31 | 1,367.83 |
| Control | 6018 | Trx-like protein                         | gi 109726696,gi 115494922,gi 122145628,gi 126920889,gi 146231808        | 31,563.90 | 100.00% | 4 | 4 | 4  | 0.04% | 8.63%  | LLPESSQ PLKK                | 2.04 | 1,239.73 |
| Control | 6018 | Trx-like protein                         | gi 109726696,gi 115494922,gi 122145628,gi 126920889,gi 146231808        | 31,563.90 | 100.00% | 4 | 4 | 4  | 0.04% | 8.63%  | VDVTEQ PGLSGR               | 4.78 | 1,257.64 |
| Control | 6018 | PREDICTED: similar to Vezeatin isoform 2 | gi 119891996                                                            | 88,604.30 | 99.80%  | 2 | 2 | 2  | 0.02% | 2.94%  | NDTEEE NNKTST ADNEISSR      | 3.65 | 2,253.97 |
| Control | 6018 | PREDICTED: similar to Vezeatin isoform 2 | gi 119891996                                                            | 88,604.30 | 99.80%  | 2 | 2 | 2  | 0.02% | 2.94%  | VGKNDT EEENNK TSTADN EISSR  | 2.68 | 2,538.16 |
| Control | 6018 | Ribosomal protein L26                    | gi 148744293,gi 28189348,gi 28189641,gi 62751887,gi 7268218,gi 76613859 | 17,240.40 | 99.80%  | 2 | 3 | 3  | 0.03% | 17.20% | MKFNPV VTSDR                | 3.49 | 1,357.66 |
| Control | 6018 | Ribosomal protein L26                    | gi 148744293,gi 28189348,gi 28189641,gi 62751887,gi 7268218,gi 76613859 | 17,240.40 | 99.80%  | 2 | 3 | 3  | 0.03% | 17.20% | SMPIRK DDEVQV VR            | 3.13 | 1,687.88 |
| Control | 6018 | endothelial cell-specific molecule 2     | gi 114053335,gi 86438024                                                | 20,621.00 | 99.80%  | 2 | 3 | 7  | 0.07% | 13.20% | ESEDPQ KPGSSG LSESGST ANGEK | 4.6  | 2,378.06 |

|         |      |                                                      |                          |            |         |   |   |    |       |        |                                                        |      |          |
|---------|------|------------------------------------------------------|--------------------------|------------|---------|---|---|----|-------|--------|--------------------------------------------------------|------|----------|
| Control | 6018 | endothelial cell-specific molecule 2                 | gi 114053335,gi 86438024 | 20,621.00  | 99.80%  | 2 | 3 | 7  | 0.07% | 13.20% | NKESED<br>PQKPGS<br>SGLSESG<br>STANGE<br>K             | 3.71 | 2,620.20 |
| Control | 6018 | PREDICTED: similar to leucyl/cystinyl aminopeptidase | gi 119895933             | 119,380.70 | 100.00% | 7 | 9 | 11 | 0.11% | 8.31%  | ANLINNI<br>FELAGL<br>GK                                | 4.38 | 1,586.89 |
| Control | 6018 | PREDICTED: similar to leucyl/cystinyl aminopeptidase | gi 119895933             | 119,380.70 | 100.00% | 7 | 9 | 11 | 0.11% | 8.31%  | DEQYTA<br>LSNMPK                                       | 3.21 | 1,412.64 |
| Control | 6018 | PREDICTED: similar to leucyl/cystinyl aminopeptidase | gi 119895933             | 119,380.70 | 100.00% | 7 | 9 | 11 | 0.11% | 8.31%  | GFPLVT<br>VQR                                          | 2.91 | 1,016.59 |
| Control | 6018 | PREDICTED: similar to leucyl/cystinyl aminopeptidase | gi 119895933             | 119,380.70 | 100.00% | 7 | 9 | 11 | 0.11% | 8.31%  | GLGEHE<br>LDEDEE<br>DYESSA<br>K                        | 6.17 | 2,151.88 |
| Control | 6018 | PREDICTED: similar to leucyl/cystinyl aminopeptidase | gi 119895933             | 119,380.70 | 100.00% | 7 | 9 | 11 | 0.11% | 8.31%  | IFGELSS<br>YEDFLD<br>AR                                | 4.79 | 1,761.83 |
| Control | 6018 | PREDICTED: similar to leucyl/cystinyl aminopeptidase | gi 119895933             | 119,380.70 | 100.00% | 7 | 9 | 11 | 0.11% | 8.31%  | IKRDEQ<br>YTALSN<br>MPK                                | 3.99 | 1,809.92 |
| Control | 6018 | PREDICTED: similar to leucyl/cystinyl aminopeptidase | gi 119895933             | 119,380.70 | 100.00% | 7 | 9 | 11 | 0.11% | 8.31%  | KYFAAT<br>QFEPLA<br>AR                                 | 3.38 | 1,612.85 |
| Control | 6018 | CYB5B protein                                        | gi 158455068,gi 76640228 | 26,782.70  | 99.80%  | 2 | 2 | 4  | 0.04% | 19.40% | EQGVET<br>SVTYR                                        | 2.54 | 1,431.68 |
| Control | 6018 | CYB5B protein                                        | gi 158455068,gi 76640228 | 26,782.70  | 99.80%  | 2 | 2 | 4  | 0.04% | 19.40% | FLDEHP<br>GGEEVL<br>MEQAGG<br>DATESFE<br>DVGHSS<br>DAR | 4.88 | 3,634.55 |

|         |      |                                                                                   |                                                                                           |           |         |   |   |   |       |        |                                                                   |      |          |
|---------|------|-----------------------------------------------------------------------------------|-------------------------------------------------------------------------------------------|-----------|---------|---|---|---|-------|--------|-------------------------------------------------------------------|------|----------|
| Control | 6018 | Chain B, Crystal Structure Of Bovine Heart Mitochondrial Bcl With Jg144 Inhibitor | gi 114793902,gi 27807143,gi 300,gi 401248,gi 59858351,gi 73586962,gi 82407277,gi 82407288 | 46,506.00 | 100.00% | 4 | 4 | 5 | 0.05% | 18.50% | EQNGDS<br>LVHAAL<br>VAESAAI<br>GSAEAN<br>AFSVLQ<br>HVLGAG<br>PHVK | 3.45 | 4,065.08 |
| Control | 6018 | Chain B, Crystal Structure Of Bovine Heart Mitochondrial Bcl With Jg144 Inhibitor | gi 114793902,gi 27807143,gi 300,gi 401248,gi 59858351,gi 73586962,gi 82407277,gi 82407288 | 46,506.00 | 100.00% | 4 | 4 | 5 | 0.05% | 18.50% | MALIGL<br>GVSHPV<br>LK                                            | 4    | 1,450.85 |
| Control | 6018 | Chain B, Crystal Structure Of Bovine Heart Mitochondrial Bcl With Jg144 Inhibitor | gi 114793902,gi 27807143,gi 300,gi 401248,gi 59858351,gi 73586962,gi 82407277,gi 82407288 | 46,506.00 | 100.00% | 4 | 4 | 5 | 0.05% | 18.50% | QVAEQF<br>LNIR                                                    | 2.95 | 1,217.66 |
| Control | 6018 | Chain B, Crystal Structure Of Bovine Heart Mitochondrial Bcl With Jg144 Inhibitor | gi 114793902,gi 27807143,gi 300,gi 401248,gi 59858351,gi 73586962,gi 82407277,gi 82407288 | 46,506.00 | 100.00% | 4 | 4 | 5 | 0.05% | 18.50% | TIAQGN<br>LSNPDV<br>QAAK                                          | 5.15 | 1,626.84 |
| Control | 6018 | NADH dehydrogenase (ubiquinone) Fe-S protein 1, 75kDa (NADH-coenzyme Q reductase) | gi 111308529,gi 128825,gi 163414,gi 27807355                                              | 79,425.10 | 100.00% | 4 | 4 | 4 | 0.04% | 8.94%  | ALSEIAG<br>MTLPYD<br>TLDQVR                                       | 3.07 | 2,109.05 |

|         |      |                                                                                   |                                                                         |           |         |   |   |   |       |        |                            |      |          |
|---------|------|-----------------------------------------------------------------------------------|-------------------------------------------------------------------------|-----------|---------|---|---|---|-------|--------|----------------------------|------|----------|
| Control | 6018 | NADH dehydrogenase (ubiquinone) Fe-S protein 1, 75kDa (NADH-coenzyme Q reductase) | gi 111308529,gi 128825,gi 163414,gi 27807355                            | 79,425.10 | 100.00% | 4 | 4 | 4 | 0.04% | 8.94%  | NDGAAI<br>LAAVSNI<br>AQK   | 4.23 | 1,555.84 |
| Control | 6018 | NADH dehydrogenase (ubiquinone) Fe-S protein 1, 75kDa (NADH-coenzyme Q reductase) | gi 111308529,gi 128825,gi 163414,gi 27807355                            | 79,425.10 | 100.00% | 4 | 4 | 4 | 0.04% | 8.94%  | NRLEEV<br>SPNLVR           | 3.77 | 1,425.78 |
| Control | 6018 | NADH dehydrogenase (ubiquinone) Fe-S protein 1, 75kDa (NADH-coenzyme Q reductase) | gi 111308529,gi 128825,gi 163414,gi 27807355                            | 79,425.10 | 100.00% | 4 | 4 | 4 | 0.04% | 8.94%  | YDDVEG<br>ANYFQQ<br>ASELSK | 3.27 | 2,063.92 |
| Control | 6018 | Chain A, Crystal Structure Of Bovine Heart Mitochondrial Bcl With Jg144 Inhibitor | gi 114793901,gi 71042575,gi 71042585,gi 7565179,gi 75765190,gi 82407287 | 49,194.40 | 100.00% | 5 | 6 | 6 | 0.06% | 16.80% | ADLTEY<br>LSR              | 2.61 | 1,067.54 |
| Control | 6018 | Chain A, Crystal Structure Of Bovine Heart Mitochondrial Bcl With Jg144 Inhibitor | gi 114793901,gi 71042575,gi 71042585,gi 7565179,gi 75765190,gi 82407287 | 49,194.40 | 100.00% | 5 | 6 | 6 | 0.06% | 16.80% | DVILQEL<br>QENDTS<br>MR    | 4.09 | 1,806.85 |

|         |      |                                                                                                                                                                                                 |           |         |    |    |    |       |        |                                           |          |
|---------|------|-------------------------------------------------------------------------------------------------------------------------------------------------------------------------------------------------|-----------|---------|----|----|----|-------|--------|-------------------------------------------|----------|
| Control | 6018 | Chain A, gi 1147939<br>Crystal 01,gi 71042<br>Structure 575,gi 7104<br>Of 2585,gi 757<br>Bovine 65179,gi 75<br>Heart 765190,gi 8<br>Mitochon 2407287<br>drial Bcl<br>With<br>Jg144<br>Inhibitor | 49,194.40 | 100.00% | 5  | 6  | 6  | 0.06% | 16.80% | EVESMG 3.18<br>AHLNAY<br>STR              | 1,680.76 |
| Control | 6018 | Chain A, gi 1147939<br>Crystal 01,gi 71042<br>Structure 575,gi 7104<br>Of 2585,gi 757<br>Bovine 65179,gi 75<br>Heart 765190,gi 8<br>Mitochon 2407287<br>drial Bcl<br>With<br>Jg144<br>Inhibitor | 49,194.40 | 100.00% | 5  | 6  | 6  | 0.06% | 16.80% | MVLAAA 2.96<br>GGLEHR                     | 1,240.65 |
| Control | 6018 | Chain A, gi 1147939<br>Crystal 01,gi 71042<br>Structure 575,gi 7104<br>Of 2585,gi 757<br>Bovine 65179,gi 75<br>Heart 765190,gi 8<br>Mitochon 2407287<br>drial Bcl<br>With<br>Jg144<br>Inhibitor | 49,194.40 | 100.00% | 5  | 6  | 6  | 0.06% | 16.80% | TATYAQ 3.58<br>ALQSVV<br>ETQVSQ<br>LDNGLR | 2,590.31 |
| Control | 6018 | Flotillin 1 gi 1153050<br>33,gi 11600<br>4001,gi 118<br>572320,gi 7<br>5775078                                                                                                                  | 47,334.80 | 100.00% | 10 | 12 | 13 | 0.13% | 34.40% | AQQVAV 4.22<br>QEQEIAR                    | 1,469.77 |
| Control | 6018 | Flotillin 1 gi 1153050<br>33,gi 11600<br>4001,gi 118<br>572320,gi 7<br>5775078                                                                                                                  | 47,334.80 | 100.00% | 10 | 12 | 13 | 0.13% | 34.40% | DIHDDQ 3.3<br>DYLHSL<br>GK                | 1,655.77 |
| Control | 6018 | Flotillin 1 gi 1153050<br>33,gi 11600<br>4001,gi 118<br>572320,gi 7<br>5775078                                                                                                                  | 47,334.80 | 100.00% | 10 | 12 | 13 | 0.13% | 34.40% | ISLNTLT 2.84<br>LNVK                      | 1,215.73 |
| Control | 6018 | Flotillin 1 gi 1153050<br>33,gi 11600<br>4001,gi 118<br>572320,gi 7<br>5775078                                                                                                                  | 47,334.80 | 100.00% | 10 | 12 | 13 | 0.13% | 34.40% | ITLVSSG 4.33<br>SGAMGA<br>AK              | 1,365.70 |
| Control | 6018 | Flotillin 1 gi 1153050<br>33,gi 11600<br>4001,gi 118<br>572320,gi 7<br>5775078                                                                                                                  | 47,334.80 | 100.00% | 10 | 12 | 13 | 0.13% | 34.40% | KAEAFQ 3.96<br>LYQEAA<br>QLDMLL<br>EK     | 2,355.19 |

|         |      |                                              |                                                                           |           |         |    |    |    |       |        |                            |      |          |
|---------|------|----------------------------------------------|---------------------------------------------------------------------------|-----------|---------|----|----|----|-------|--------|----------------------------|------|----------|
| Control | 6018 | Flotillin 1                                  | gi 115305033,gi 116004001,gi 118572320,gi 75775078                        | 47,334.80 | 100.00% | 10 | 12 | 13 | 0.13% | 34.40% | LPQVAE<br>EISGPLT<br>SANK  | 4.99 | 1,753.93 |
| Control | 6018 | Flotillin 1                                  | gi 115305033,gi 116004001,gi 118572320,gi 75775078                        | 47,334.80 | 100.00% | 10 | 12 | 13 | 0.13% | 34.40% | SQLIMQ<br>AEAEAE<br>AVR    | 4.29 | 1,661.82 |
| Control | 6018 | Flotillin 1                                  | gi 115305033,gi 116004001,gi 118572320,gi 75775078                        | 47,334.80 | 100.00% | 10 | 12 | 13 | 0.13% | 34.40% | TEAEIAH<br>IALETLE<br>GHQR | 4.04 | 2,018.03 |
| Control | 6018 | Flotillin 1                                  | gi 115305033,gi 116004001,gi 118572320,gi 75775078                        | 47,334.80 | 100.00% | 10 | 12 | 13 | 0.13% | 34.40% | VSAQYL<br>SEIEMA<br>K      | 3.51 | 1,484.73 |
| Control | 6018 | Flotillin 1                                  | gi 115305033,gi 116004001,gi 118572320,gi 75775078                        | 47,334.80 | 100.00% | 10 | 12 | 13 | 0.13% | 34.40% | VTGEVL<br>DILSR            | 2.37 | 1,201.68 |
| Control | 6018 | PREDIC TED: similar to ribosomal protein S24 | gi 119914811,gi 194677142,gi 58760477,gi 70778760,gi 74268388,gi 91207637 | 15,283.40 | 100.00% | 3  | 3  | 5  | 0.05% | 29.50% | KQMVID<br>VLHPGK           | 3.68 | 1,380.77 |
| Control | 6018 | PREDIC TED: similar to ribosomal protein S24 | gi 119914811,gi 194677142,gi 58760477,gi 70778760,gi 74268388,gi 91207637 | 15,283.40 | 100.00% | 3  | 3  | 5  | 0.05% | 29.50% | TTGFGM<br>IYDSLIDY<br>AK   | 3.99 | 1,697.77 |
| Control | 6018 | PREDIC TED: similar to ribosomal protein S24 | gi 119914811,gi 194677142,gi 58760477,gi 70778760,gi 74268388,gi 91207637 | 15,283.40 | 100.00% | 3  | 3  | 5  | 0.05% | 29.50% | TTPDVIF<br>VFGFR           | 2.37 | 1,398.74 |
| Control | 6018 | similar to 40S ribosomal protein S18         | gi 28189422,gi 28189549,gi 28189799,gi 74268023,gi 75812924,gi 91207636   | 15,380.70 | 100.00% | 3  | 4  | 6  | 0.06% | 25.20% | IAFAITAI<br>K              | 2.75 | 947.5925 |
| Control | 6018 | similar to 40S ribosomal protein S18         | gi 28189422,gi 28189549,gi 28189799,gi 74268023,gi 75812924,gi 91207636   | 15,380.70 | 100.00% | 3  | 4  | 6  | 0.06% | 25.20% | RAGELT<br>EDEVER           | 4.27 | 1,403.68 |

|         |      |                                                                                      |                                                                                                 |           |         |   |   |    |       |        |                                                                  |      |          |
|---------|------|--------------------------------------------------------------------------------------|-------------------------------------------------------------------------------------------------|-----------|---------|---|---|----|-------|--------|------------------------------------------------------------------|------|----------|
| Control | 6018 | similar to<br>40S<br>ribosomal<br>protein<br>S18                                     | gi 2818942<br>2,gi 281895<br>49,gi 28189<br>799,gi 7426<br>8023,gi 758<br>12924,gi 91<br>207636 | 15,380.70 | 100.00% | 3 | 4 | 6  | 0.06% | 25.20% | YSQVLA<br>NGLDNK                                                 | 3.76 | 1,321.67 |
| Control | 6018 | glutathio<br>ne<br>peroxidas<br>e 8                                                  | gi 1140529<br>07,gi 12214<br>3886,gi 847<br>08688                                               | 23,965.80 | 99.80%  | 2 | 3 | 3  | 0.03% | 11.00% | ILGSEAE<br>PAFR                                                  | 3.1  | 1,189.62 |
| Control | 6018 | glutathio<br>ne<br>peroxidas<br>e 8                                                  | gi 1140529<br>07,gi 12214<br>3886,gi 847<br>08688                                               | 23,965.80 | 99.80%  | 2 | 3 | 3  | 0.03% | 11.00% | NNFGVT<br>FPIPHK                                                 | 2.77 | 1,420.74 |
| Control | 6018 | Tumor<br>protein<br>p53<br>inducible<br>protein<br>11                                | gi 1113049<br>79,gi 11549<br>6424                                                               | 20,907.40 | 99.80%  | 2 | 2 | 2  | 0.02% | 13.80% | ISQVLGN<br>EIK                                                   | 3.09 | 1,100.63 |
| Control | 6018 | Tumor<br>protein<br>p53<br>inducible<br>protein<br>11                                | gi 1113049<br>79,gi 11549<br>6424                                                               | 20,907.40 | 99.80%  | 2 | 2 | 2  | 0.02% | 13.80% | KILGVG<br>GEDDDG<br>EVHR                                         | 4.51 | 1,695.83 |
| Control | 6018 | dolichyl-<br>diphosph<br>ooligosac<br>charide-<br>protein<br>glycosyltr<br>ansferase | gi 1106655<br>90,gi 15155<br>5878,gi 155<br>371877,gi 2<br>15275740                             | 48,774.90 | 100.00% | 7 | 8 | 18 | 0.18% | 28.50% | GFVLTF<br>K                                                      | 2.03 | 811.4713 |
| Control | 6018 | dolichyl-<br>diphosph<br>ooligosac<br>charide-<br>protein<br>glycosyltr<br>ansferase | gi 1106655<br>90,gi 15155<br>5878,gi 155<br>371877,gi 2<br>15275740                             | 48,774.90 | 100.00% | 7 | 8 | 18 | 0.18% | 28.50% | GVGMV<br>ADPDNP<br>LVLDILT<br>GSSTSYS<br>FFPKPI<br>TQYPHA<br>VGK | 5.32 | 4,350.16 |
| Control | 6018 | dolichyl-<br>diphosph<br>ooligosac<br>charide-<br>protein<br>glycosyltr<br>ansferase | gi 1106655<br>90,gi 15155<br>5878,gi 155<br>371877,gi 2<br>15275740                             | 48,774.90 | 100.00% | 7 | 8 | 18 | 0.18% | 28.50% | LPDVYG<br>VFQFK                                                  | 3.95 | 1,312.69 |
| Control | 6018 | dolichyl-<br>diphosph<br>ooligosac<br>charide-<br>protein<br>glycosyltr<br>ansferase | gi 1106655<br>90,gi 15155<br>5878,gi 155<br>371877,gi 2<br>15275740                             | 48,774.90 | 100.00% | 7 | 8 | 18 | 0.18% | 28.50% | TADDPS<br>LSLIK                                                  | 3.31 | 1,159.62 |
| Control | 6018 | dolichyl-<br>diphosph<br>ooligosac<br>charide-<br>protein<br>glycosyltr<br>ansferase | gi 1106655<br>90,gi 15155<br>5878,gi 155<br>371877,gi 2<br>15275740                             | 48,774.90 | 100.00% | 7 | 8 | 18 | 0.18% | 28.50% | TAVIDH<br>HNYDVS<br>DLGQHT<br>LIVADTE<br>NLLK                    | 5.41 | 3,231.63 |
| Control | 6018 | dolichyl-<br>diphosph<br>ooligosac<br>charide-<br>protein<br>glycosyltr<br>ansferase | gi 1106655<br>90,gi 15155<br>5878,gi 155<br>371877,gi 2<br>15275740                             | 48,774.90 | 100.00% | 7 | 8 | 18 | 0.18% | 28.50% | TLVLLD<br>NLNLR                                                  | 3.61 | 1,283.77 |



|         |      |                                                                                      |                                                                     |           |         |   |   |    |       |        |                                                   |          |
|---------|------|--------------------------------------------------------------------------------------|---------------------------------------------------------------------|-----------|---------|---|---|----|-------|--------|---------------------------------------------------|----------|
| Control | 6018 | dolichyl-<br>diphosph<br>ooligosac<br>charide-<br>protein<br>glycosyltr<br>ansferase | gi 1106655<br>90,gi 15155<br>5878,gi 155<br>371877,gi 2<br>15275740 | 48,774.90 | 100.00% | 7 | 8 | 18 | 0.18% | 28.50% | YSQTGN 4.09<br>YELAVA<br>LSR                      | 1,671.83 |
| Control | 6018 | reticulon<br>4 isoform<br>2                                                          | gi 1642593<br>54,gi 92096<br>636                                    | 40,940.20 | 100.00% | 3 | 3 | 6  | 0.06% | 11.10% | GPLPAA 3.4<br>PLAAPE<br>R                         | 1,259.71 |
| Control | 6018 | reticulon<br>4 isoform<br>2                                                          | gi 1642593<br>54,gi 92096<br>636                                    | 40,940.20 | 100.00% | 3 | 3 | 6  | 0.06% | 11.10% | HQAQID 4.26<br>HYLGLA<br>NK                       | 1,607.83 |
| Control | 6018 | reticulon<br>4 isoform<br>2                                                          | gi 1642593<br>54,gi 92096<br>636                                    | 40,940.20 | 100.00% | 3 | 3 | 6  | 0.06% | 11.10% | RGSSGS 2.3<br>VVVDLL<br>YWR                       | 1,693.90 |
| Control | 6018 | ADP-<br>ribosylati<br>on factor-<br>like 8B                                          | gi 1140515<br>48,gi 86438<br>183,gi 9320<br>4537                    | 21,493.90 | 100.00% | 2 | 2 | 2  | 0.02% | 21.50% | GVNAIV 4.3<br>YMIDAA<br>DREK                      | 1,780.89 |
| Control | 6018 | ADP-<br>ribosylati<br>on factor-<br>like 8B                                          | gi 1140515<br>48,gi 86438<br>183,gi 9320<br>4537                    | 21,493.90 | 100.00% | 2 | 2 | 2  | 0.02% | 21.50% | NELHNL 2.61<br>LDKPQL<br>QGIPVLV<br>LGNKR         | 2,708.56 |
| Control | 6018 | ATL3<br>protein                                                                      | gi 1487454<br>56,gi 15470<br>7918                                   | 60,294.70 | 100.00% | 6 | 8 | 10 | 0.10% | 20.00% | ALASILL 2.1<br>QDHIR                              | 1,349.79 |
| Control | 6018 | ATL3<br>protein                                                                      | gi 1487454<br>56,gi 15470<br>7918                                   | 60,294.70 | 100.00% | 6 | 8 | 10 | 0.10% | 20.00% | IYQGED 3.41<br>LPHPK                              | 1,296.66 |
| Control | 6018 | ATL3<br>protein                                                                      | gi 1487454<br>56,gi 15470<br>7918                                   | 60,294.70 | 100.00% | 6 | 8 | 10 | 0.10% | 20.00% | LAMDEIF 3.86<br>QKPFQT<br>LMFLVR                  | 2,343.22 |
| Control | 6018 | ATL3<br>protein                                                                      | gi 1487454<br>56,gi 15470<br>7918                                   | 60,294.70 | 100.00% | 6 | 8 | 10 | 0.10% | 20.00% | LKDIASE 3.93<br>FKEQLQ<br>TLILHVL<br>NPANLM<br>EK | 3,251.77 |
| Control | 6018 | ATL3<br>protein                                                                      | gi 1487454<br>56,gi 15470<br>7918                                   | 60,294.70 | 100.00% | 6 | 8 | 10 | 0.10% | 20.00% | SMLQAT 5.33<br>AEANNL<br>AAAASA<br>K              | 1,848.91 |
| Control | 6018 | ATL3<br>protein                                                                      | gi 1487454<br>56,gi 15470<br>7918                                   | 60,294.70 | 100.00% | 6 | 8 | 10 | 0.10% | 20.00% | VAVVLM 4.02<br>DTQGAF<br>DSQSTV<br>K              | 2,012.00 |
| Control | 6018 | Lamin<br>A/C                                                                         | gi 7435471<br>9,gi 774041<br>82                                     | 65,105.20 | 100.00% | 5 | 6 | 6  | 0.06% | 12.10% | IRIDSLS 4.2<br>AQLSQL<br>QK                       | 1,699.97 |
| Control | 6018 | Lamin<br>A/C                                                                         | gi 7435471<br>9,gi 774041<br>82                                     | 65,105.20 | 100.00% | 5 | 6 | 6  | 0.06% | 12.10% | LQEKED 4.83<br>LQELND<br>R                        | 1,629.81 |
| Control | 6018 | Lamin<br>A/C                                                                         | gi 7435471<br>9,gi 774041<br>82                                     | 65,105.20 | 100.00% | 5 | 6 | 6  | 0.06% | 12.10% | LQTLKE 3.26<br>ELDFQK                             | 1,491.81 |
| Control | 6018 | Lamin<br>A/C                                                                         | gi 7435471<br>9,gi 774041<br>82                                     | 65,105.20 | 100.00% | 5 | 6 | 6  | 0.06% | 12.10% | MQQLD 4.43<br>EYQELL<br>DIK                       | 1,909.92 |
| Control | 6018 | Lamin<br>A/C                                                                         | gi 7435471<br>9,gi 774041<br>82                                     | 65,105.20 | 100.00% | 5 | 6 | 6  | 0.06% | 12.10% | TALINST 3.64<br>GEEVAM<br>R                       | 1,507.74 |

|         |      |                                                                                                                                         |                                                   |           |         |    |    |    |       |        |                                                 |          |
|---------|------|-----------------------------------------------------------------------------------------------------------------------------------------|---------------------------------------------------|-----------|---------|----|----|----|-------|--------|-------------------------------------------------|----------|
| Control | 6018 | serpin<br>peptidase<br>inhibitor,<br>clade H<br>(heat<br>shock<br>protein<br>47),<br>member<br>1,<br>(collagen<br>binding<br>protein 1) | gi 1140515<br>05,gi 11625<br>6076,gi 868<br>21084 | 46,490.00 | 100.00% | 11 | 12 | 21 | 0.21% | 36.80% | AVAISLP 2.08<br>K                               | 798.5084 |
| Control | 6018 | serpin<br>peptidase<br>inhibitor,<br>clade H<br>(heat<br>shock<br>protein<br>47),<br>member<br>1,<br>(collagen<br>binding<br>protein 1) | gi 1140515<br>05,gi 11625<br>6076,gi 868<br>21084 | 46,490.00 | 100.00% | 11 | 12 | 21 | 0.21% | 36.80% | AVLSAE 5.45<br>QLRDDE<br>VHAGLG<br>ELLR         | 2,391.26 |
| Control | 6018 | serpin<br>peptidase<br>inhibitor,<br>clade H<br>(heat<br>shock<br>protein<br>47),<br>member<br>1,<br>(collagen<br>binding<br>protein 1) | gi 1140515<br>05,gi 11625<br>6076,gi 868<br>21084 | 46,490.00 | 100.00% | 11 | 12 | 21 | 0.21% | 36.80% | DQAVEN 4.49<br>ILLSPVV<br>VASSLG<br>LVSLGG<br>K | 2,565.45 |
| Control | 6018 | serpin<br>peptidase<br>inhibitor,<br>clade H<br>(heat<br>shock<br>protein<br>47),<br>member<br>1,<br>(collagen<br>binding<br>protein 1) | gi 1140515<br>05,gi 11625<br>6076,gi 868<br>21084 | 46,490.00 | 100.00% | 11 | 12 | 21 | 0.21% | 36.80% | DTQSGS 2.42<br>LLFIGR                           | 1,293.68 |

|         |      |                                                                                                                                         |                                                   |           |         |    |    |    |       |        |                         |      |          |
|---------|------|-----------------------------------------------------------------------------------------------------------------------------------------|---------------------------------------------------|-----------|---------|----|----|----|-------|--------|-------------------------|------|----------|
| Control | 6018 | serpin<br>peptidase<br>inhibitor,<br>clade H<br>(heat<br>shock<br>protein<br>47),<br>member<br>1,<br>(collagen<br>binding<br>protein 1) | gi 1140515<br>05,gi 11625<br>6076,gi 868<br>21084 | 46,490.00 | 100.00% | 11 | 12 | 21 | 0.21% | 36.80% | GVVEVT<br>HDLQK         | 3.45 | 1,224.66 |
| Control | 6018 | serpin<br>peptidase<br>inhibitor,<br>clade H<br>(heat<br>shock<br>protein<br>47),<br>member<br>1,<br>(collagen<br>binding<br>protein 1) | gi 1140515<br>05,gi 11625<br>6076,gi 868<br>21084 | 46,490.00 | 100.00% | 11 | 12 | 21 | 0.21% | 36.80% | HLAGLG<br>LTEAIDK<br>NK | 5.37 | 1,579.88 |
| Control | 6018 | serpin<br>peptidase<br>inhibitor,<br>clade H<br>(heat<br>shock<br>protein<br>47),<br>member<br>1,<br>(collagen<br>binding<br>protein 1) | gi 1140515<br>05,gi 11625<br>6076,gi 868<br>21084 | 46,490.00 | 100.00% | 11 | 12 | 21 | 0.21% | 36.80% | KAVAI<br>SLPK           | 3.27 | 926.6034 |
| Control | 6018 | serpin<br>peptidase<br>inhibitor,<br>clade H<br>(heat<br>shock<br>protein<br>47),<br>member<br>1,<br>(collagen<br>binding<br>protein 1) | gi 1140515<br>05,gi 11625<br>6076,gi 868<br>21084 | 46,490.00 | 100.00% | 11 | 12 | 21 | 0.21% | 36.80% | LFYADH<br>PFIFLVR       | 3.4  | 1,637.88 |

|         |      |                                                                                                                                         |                                                   |           |         |    |    |    |       |        |                           |      |          |
|---------|------|-----------------------------------------------------------------------------------------------------------------------------------------|---------------------------------------------------|-----------|---------|----|----|----|-------|--------|---------------------------|------|----------|
| Control | 6018 | serpin<br>peptidase<br>inhibitor,<br>clade H<br>(heat<br>shock<br>protein<br>47),<br>member<br>1,<br>(collagen<br>binding<br>protein 1) | gi 1140515<br>05,gi 11625<br>6076,gi 868<br>21084 | 46,490.00 | 100.00% | 11 | 12 | 21 | 0.21% | 36.80% | LSSLIIIM<br>PHHVEP<br>LER | 2.57 | 2,000.10 |
| Control | 6018 | serpin<br>peptidase<br>inhibitor,<br>clade H<br>(heat<br>shock<br>protein<br>47),<br>member<br>1,<br>(collagen<br>binding<br>protein 1) | gi 1140515<br>05,gi 11625<br>6076,gi 868<br>21084 | 46,490.00 | 100.00% | 11 | 12 | 21 | 0.21% | 36.80% | LYGPSS<br>VSFAED<br>FVR   | 4.41 | 1,673.82 |
| Control | 6018 | serpin<br>peptidase<br>inhibitor,<br>clade H<br>(heat<br>shock<br>protein<br>47),<br>member<br>1,<br>(collagen<br>binding<br>protein 1) | gi 1140515<br>05,gi 11625<br>6076,gi 868<br>21084 | 46,490.00 | 100.00% | 11 | 12 | 21 | 0.21% | 36.80% | SAGLAF<br>SLYQAM<br>AK    | 4.41 | 1,473.74 |
| Control | 6018 | PREDIC<br>TED:<br>hypotheti<br>cal<br>protein                                                                                           | gi 1946673<br>11                                  | 68,113.30 | 99.80%  | 2  | 3  | 3  | 0.03% | 4.64%  | ELESQIS<br>ELQEDL<br>ESER | 4.22 | 2,033.95 |
| Control | 6018 | PREDIC<br>TED:<br>hypotheti<br>cal<br>protein                                                                                           | gi 1946673<br>11                                  | 68,113.30 | 99.80%  | 2  | 3  | 3  | 0.03% | 4.64%  | XXXXXX<br>XXXXXX          | 3.62 | 1,240.02 |
| Control | 6018 | PREDIC<br>TED:<br>transmem<br>brane<br>emp24<br>protein<br>transport<br>domain<br>containin<br>g 4                                      | gi 1946663<br>84                                  | 37,465.50 | 100.00% | 3  | 3  | 4  | 0.04% | 13.10% | DKLTEL<br>QLR             | 3.32 | 1,115.64 |

|         |      |                                                                        |                                                           |            |         |    |    |    |       |        |                                |      |          |
|---------|------|------------------------------------------------------------------------|-----------------------------------------------------------|------------|---------|----|----|----|-------|--------|--------------------------------|------|----------|
| Control | 6018 | PREDIC TED: transmembrane emp24 protein transport domain containin g 4 | gi 194666384                                              | 37,465.50  | 100.00% | 3  | 3  | 4  | 0.04% | 13.10% | KKEVFL PSTPGLG MHVEVK DPEGK    | 2.58 | 2,638.36 |
| Control | 6018 | PREDIC TED: transmembrane emp24 protein transport domain containin g 4 | gi 194666384                                              | 37,465.50  | 100.00% | 3  | 3  | 4  | 0.04% | 13.10% | QLLDQV EQIQK                   | 4.1  | 1,341.74 |
| Control | 6018 | NNT protein                                                            | gi 133777477,gi 163397,gi 163410,gi 172045566,gi 27806831 | 113,839.20 | 100.00% | 10 | 12 | 17 | 0.17% | 14.70% | AVVLAA NHFGR                   | 2.59 | 1,154.64 |
| Control | 6018 | NNT protein                                                            | gi 133777477,gi 163397,gi 163410,gi 172045566,gi 27806831 | 113,839.20 | 100.00% | 10 | 12 | 17 | 0.17% | 14.70% | FFTQGIT AAGK                   | 3.18 | 1,140.60 |
| Control | 6018 | NNT protein                                                            | gi 133777477,gi 163397,gi 163410,gi 172045566,gi 27806831 | 113,839.20 | 100.00% | 10 | 12 | 17 | 0.17% | 14.70% | GITHIGY TDLPSR                 | 4.41 | 1,429.74 |
| Control | 6018 | NNT protein                                                            | gi 133777477,gi 163397,gi 163410,gi 172045566,gi 27806831 | 113,839.20 | 100.00% | 10 | 12 | 17 | 0.17% | 14.70% | ILIVGGG VAGLAS AGAAK           | 4.76 | 1,524.91 |
| Control | 6018 | NNT protein                                                            | gi 133777477,gi 163397,gi 163410,gi 172045566,gi 27806831 | 113,839.20 | 100.00% | 10 | 12 | 17 | 0.17% | 14.70% | MATQAS TLYSNNI TK              | 5.03 | 1,658.81 |
| Control | 6018 | NNT protein                                                            | gi 133777477,gi 163397,gi 163410,gi 172045566,gi 27806831 | 113,839.20 | 100.00% | 10 | 12 | 17 | 0.17% | 14.70% | SLGAEPL EVDLK                  | 2.49 | 1,270.69 |
| Control | 6018 | NNT protein                                                            | gi 133777477,gi 163397,gi 163410,gi 172045566,gi 27806831 | 113,839.20 | 100.00% | 10 | 12 | 17 | 0.17% | 14.70% | SLGVGY AAVDNP IFYKPT AMLLGD AK | 3.49 | 2,841.45 |
| Control | 6018 | NNT protein                                                            | gi 133777477,gi 163397,gi 163410,gi 172045566,gi 27806831 | 113,839.20 | 100.00% | 10 | 12 | 17 | 0.17% | 14.70% | TSGTLIS FIYPAQN PDLLNK         | 4.52 | 2,192.16 |

|         |      |                                                          |                                                             |            |         |    |    |    |       |        |                                   |      |          |
|---------|------|----------------------------------------------------------|-------------------------------------------------------------|------------|---------|----|----|----|-------|--------|-----------------------------------|------|----------|
| Control | 6018 | NNT protein                                              | gi 1337774<br>77,gi 163397,gi 163410,gi 1720455,gi 27806831 | 113,839.20 | 100.00% | 10 | 12 | 17 | 0.17% | 14.70% | VALSPA<br>GVQALV<br>K             | 3.23 | 1,252.76 |
| Control | 6018 | NNT protein                                              | gi 1337774<br>77,gi 163397,gi 163410,gi 1720455,gi 27806831 | 113,839.20 | 100.00% | 10 | 12 | 17 | 0.17% | 14.70% | VTIAQG<br>YDALSS<br>MANIAG<br>YK  | 5.17 | 2,089.03 |
| Control | 6018 | Transmembrane emp24-like traffickin g protein 10 (yeast) | gi 1337781<br>87,gi 59858463,gi 62901402,gi 94966895        | 24,810.80  | 100.00% | 9  | 14 | 29 | 0.28% | 42.00% | DLLVTG<br>AYEITD<br>QSGGAG<br>GLR | 4.78 | 2,093.05 |
| Control | 6018 | Transmembrane emp24-like traffickin g protein 10 (yeast) | gi 1337781<br>87,gi 59858463,gi 62901402,gi 94966895        | 24,810.80  | 100.00% | 9  | 14 | 29 | 0.28% | 42.00% | IPDQLVI<br>LDMK                   | 4.38 | 1,284.72 |
| Control | 6018 | Transmembrane emp24-like traffickin g protein 10 (yeast) | gi 1337781<br>87,gi 59858463,gi 62901402,gi 94966895        | 24,810.80  | 100.00% | 9  | 14 | 29 | 0.28% | 42.00% | IPDQLVI<br>LDMKHG<br>VEAK         | 3.92 | 1,922.04 |
| Control | 6018 | Transmembrane emp24-like traffickin g protein 10 (yeast) | gi 1337781<br>87,gi 59858463,gi 62901402,gi 94966895        | 24,810.80  | 100.00% | 9  | 14 | 29 | 0.28% | 42.00% | ITDSAGH<br>ILYSK                  | 4.3  | 1,304.68 |
| Control | 6018 | Transmembrane emp24-like traffickin g protein 10 (yeast) | gi 1337781<br>87,gi 59858463,gi 62901402,gi 94966895        | 24,810.80  | 100.00% | 9  | 14 | 29 | 0.28% | 42.00% | ITDSAGH<br>ILYSKED<br>ATK         | 3.94 | 1,848.93 |
| Control | 6018 | Transmembrane emp24-like traffickin g protein 10 (yeast) | gi 1337781<br>87,gi 59858463,gi 62901402,gi 94966895        | 24,810.80  | 100.00% | 9  | 14 | 29 | 0.28% | 42.00% | LKPLEV<br>ELR                     | 3.41 | 1,096.67 |
| Control | 6018 | Transmembrane emp24-like traffickin g protein 10 (yeast) | gi 1337781<br>87,gi 59858463,gi 62901402,gi 94966895        | 24,810.80  | 100.00% | 9  | 14 | 29 | 0.28% | 42.00% | NYEEIA<br>KVEK                    | 3    | 1,222.63 |

|         |      |                                                          |                                                  |           |         |   |    |    |       |        |                                                      |          |
|---------|------|----------------------------------------------------------|--------------------------------------------------|-----------|---------|---|----|----|-------|--------|------------------------------------------------------|----------|
| Control | 6018 | Transmembrane emp24-like traffickin g protein 10 (yeast) | gi 133778187,gi 59858463,gi 62901402,gi 94966895 | 24,810.80 | 100.00% | 9 | 14 | 29 | 0.28% | 42.00% | RLEDLSE 3.72<br>SIVNDFA<br>YMK                       | 2,045.99 |
| Control | 6018 | Transmembrane emp24-like traffickin g protein 10 (yeast) | gi 133778187,gi 59858463,gi 62901402,gi 94966895 | 24,810.80 | 100.00% | 9 | 14 | 29 | 0.28% | 42.00% | RLEDLSE 4.76<br>SIVNDFA<br>YMKK                      | 2,174.08 |
| Control | 6018 | signal recognition particle receptor                     | gi 115497558,gi 122139924,gi 75773717            | 69,879.80 | 100.00% | 3 | 3  | 3  | 0.03% | 8.61%  | LITVNTP 3.8<br>DLVLFV<br>GEALVG<br>NEAVDQ<br>LVK     | 2,966.65 |
| Control | 6018 | signal recognition particle receptor                     | gi 115497558,gi 122139924,gi 75773717            | 69,879.80 | 100.00% | 3 | 3  | 3  | 0.03% | 8.61%  | NQGFVDV 4.38<br>VLVDTA<br>GR                         | 1,490.76 |
| Control | 6018 | signal recognition particle receptor                     | gi 115497558,gi 122139924,gi 75773717            | 69,879.80 | 100.00% | 3 | 3  | 3  | 0.03% | 8.61%  | VMGTFS 3.09<br>TVTSTV<br>K                           | 1,373.70 |
| Control | 6018 | Stromal interaction molecule 1                           | gi 154426132,gi 61555683,gi 75057528,gi 78369570 | 77,134.40 | 100.00% | 4 | 4  | 4  | 0.04% | 12.00% | ALDTVL 3.62<br>FGPPLLT<br>R                          | 1,512.88 |
| Control | 6018 | Stromal interaction molecule 1                           | gi 154426132,gi 61555683,gi 75057528,gi 78369570 | 77,134.40 | 100.00% | 4 | 4  | 4  | 0.04% | 12.00% | DLTHSD 2.96<br>SESSLH<br>MSDR                        | 1,832.77 |
| Control | 6018 | Stromal interaction molecule 1                           | gi 154426132,gi 61555683,gi 75057528,gi 78369570 | 77,134.40 | 100.00% | 4 | 4  | 4  | 0.04% | 12.00% | KAAAE 4.16<br>DNGSIGE<br>ETDSSPG<br>R                | 2,119.94 |
| Control | 6018 | Stromal interaction molecule 1                           | gi 154426132,gi 61555683,gi 75057528,gi 78369570 | 77,134.40 | 100.00% | 4 | 4  | 4  | 0.04% | 12.00% | LMDDDA 4.35<br>NGDVDV<br>EESDEFL<br>REDLNY<br>HDPTVK | 3,611.56 |
| Control | 6018 | emerin                                                   | gi 37781186,gi 42733600,gi 74356375              | 29,454.80 | 100.00% | 5 | 6  | 6  | 0.06% | 22.20% | FSDLDS 3.38<br>ASVDS<br>MYDLPK                       | 2,020.87 |
| Control | 6018 | emerin                                                   | gi 37781186,gi 42733600,gi 74356375              | 29,454.80 | 100.00% | 5 | 6  | 6  | 0.06% | 22.20% | FSDLDS 3.95<br>ASVDS<br>MYDLPK<br>KEDALL<br>YQSK     | 3,196.49 |
| Control | 6018 | emerin                                                   | gi 37781186,gi 42733600,gi 74356375              | 29,454.80 | 100.00% | 5 | 6  | 6  | 0.06% | 22.20% | GYNDY 3.66<br>YEESYL<br>TTR                          | 1,888.79 |
| Control | 6018 | emerin                                                   | gi 37781186,gi 42733600,gi 74356375              | 29,454.80 | 100.00% | 5 | 6  | 6  | 0.06% | 22.20% | LSPSS 1.62<br>ASSFSYR                                | 1,472.70 |

|         |      |                                                |                                                      |            |         |   |   |    |       |        |                                                 |      |          |
|---------|------|------------------------------------------------|------------------------------------------------------|------------|---------|---|---|----|-------|--------|-------------------------------------------------|------|----------|
| Control | 6018 | emerin                                         | gi 37781186,gi 42733600,gi 74356375                  | 29,454.80  | 100.00% | 5 | 6 | 6  | 0.06% | 22.20% | RLSPSSY<br>SASSFSY<br>R                         | 3.23 | 1,628.80 |
| Control | 6018 | PREDICTED:<br>nestin                           | gi 76612380                                          | 175,609.70 | 99.80%  | 2 | 2 | 2  | 0.02% | 2.97%  | ALEEQN<br>ELLSAEL<br>GGLR                       | 3.1  | 1,841.96 |
| Control | 6018 | PREDICTED:<br>nestin                           | gi 76612380                                          | 175,609.70 | 99.80%  | 2 | 2 | 2  | 0.02% | 2.97%  | RPGPLLS<br>VLSPTPL<br>SSPLPGT<br>LETPVPT<br>FLK | 4.58 | 3,211.83 |
| Control | 6018 | NADH dehydrogenase (ubiquinone) 42 kDa subunit | gi 228,gi 45430053,gi 464255,gi 74268236,gi 95768472 | 41,642.50  | 99.80%  | 2 | 2 | 2  | 0.02% | 5.15%  | FLNYFA<br>NIR                                   | 3.35 | 1,157.61 |
| Control | 6018 | NADH dehydrogenase (ubiquinone) 42 kDa subunit | gi 228,gi 45430053,gi 464255,gi 74268236,gi 95768472 | 41,642.50  | 99.80%  | 2 | 2 | 2  | 0.02% | 5.15%  | IPQAIQ<br>VSK                                   | 2.77 | 1,054.63 |
| Control | 6018 | Lu-ECAM-1                                      | gi 2623763,gi 2623765,gi 2623767,gi 30794326         | 100,991.10 | 100.00% | 3 | 3 | 3  | 0.03% | 4.75%  | QESYDQ<br>ADVIVA<br>NPYLK                       | 4.05 | 1,952.96 |
| Control | 6018 | Lu-ECAM-1                                      | gi 2623763,gi 2623765,gi 2623767,gi 30794326         | 100,991.10 | 100.00% | 3 | 3 | 3  | 0.03% | 4.75%  | SGSITQQ<br>AIQLESK                              | 4.22 | 1,489.79 |
| Control | 6018 | Lu-ECAM-1                                      | gi 2623763,gi 2623765,gi 2623767,gi 30794326         | 100,991.10 | 100.00% | 3 | 3 | 3  | 0.03% | 4.75%  | TSDFKE<br>DKLNIR                                | 3.45 | 1,465.76 |
| Control | 6018 | RecName : Full=Ras-related protein Rab-7a      | gi 108860919,gi 74354082,gi 78045539                 | 23,526.10  | 100.00% | 4 | 4 | 7  | 0.07% | 21.30% | ATIGADF<br>LTK                                  | 2.47 | 1,036.57 |
| Control | 6018 | RecName : Full=Ras-related protein Rab-7a      | gi 108860919,gi 74354082,gi 78045539                 | 23,526.10  | 100.00% | 4 | 4 | 7  | 0.07% | 21.30% | DPENFPF<br>VVLGNK                               | 4.62 | 1,475.75 |
| Control | 6018 | RecName : Full=Ras-related protein Rab-7a      | gi 108860919,gi 74354082,gi 78045539                 | 23,526.10  | 100.00% | 4 | 4 | 7  | 0.07% | 21.30% | FQSLGV<br>AFYR                                  | 2.91 | 1,187.62 |
| Control | 6018 | RecName : Full=Ras-related protein Rab-7a      | gi 108860919,gi 74354082,gi 78045539                 | 23,526.10  | 100.00% | 4 | 4 | 7  | 0.07% | 21.30% | VIILGDS<br>GVGK                                 | 2.77 | 1,057.63 |
| Control | 6018 | heat shock 70kDa protein 8                     | gi 146231704                                         | 71,224.20  | 100.00% | 7 | 8 | 11 | 0.11% | 14.50% | ARFEEL<br>NADLFR                                | 3.67 | 1,480.75 |



|         |      |                                     |                                       |           |         |    |    |    |       |        |                           |      |          |
|---------|------|-------------------------------------|---------------------------------------|-----------|---------|----|----|----|-------|--------|---------------------------|------|----------|
| Control | 6018 | heat shock 70kDa protein 8          | gi 146231704                          | 71,224.20 | 100.00% | 7  | 8  | 11 | 0.11% | 14.50% | DAGTIA<br>GLNVLR          | 3.51 | 1,199.67 |
| Control | 6018 | heat shock 70kDa protein 8          | gi 146231704                          | 71,224.20 | 100.00% | 7  | 8  | 11 | 0.11% | 14.50% | IINEPTA<br>AAIAYG<br>LDK  | 3.81 | 1,659.90 |
| Control | 6018 | heat shock 70kDa protein 8          | gi 146231704                          | 71,224.20 | 100.00% | 7  | 8  | 11 | 0.11% | 14.50% | IINEPTA<br>AAIAYG<br>LDKK | 3.32 | 1,787.99 |
| Control | 6018 | heat shock 70kDa protein 8          | gi 146231704                          | 71,224.20 | 100.00% | 7  | 8  | 11 | 0.11% | 14.50% | LLQDFE<br>NGK             | 2.52 | 1,081.57 |
| Control | 6018 | heat shock 70kDa protein 8          | gi 146231704                          | 71,224.20 | 100.00% | 7  | 8  | 11 | 0.11% | 14.50% | NQVAM<br>NPTNTV<br>FDAQ   | 4.65 | 1,665.79 |
| Control | 6018 | heat shock 70kDa protein 8          | gi 146231704                          | 71,224.20 | 100.00% | 7  | 8  | 11 | 0.11% | 14.50% | STAGDT<br>HLGGED<br>FDNR  | 3.01 | 1,691.73 |
| Control | 6018 | heat shock 70kDa protein 8          | gi 146231704                          | 71,224.20 | 100.00% | 7  | 8  | 11 | 0.11% | 14.50% | TTPSYV<br>AFTDTE<br>R     | 3.12 | 1,487.70 |
| Control | 6018 | solute carrier family 25, member A6 | gi 119936593,gi 151557097,gi 32189336 | 32,860.40 | 100.00% | 10 | 11 | 55 | 0.54% | 33.60% | AAAYFGI<br>YDTAK          | 3.74 | 1,219.60 |
| Control | 6018 | solute carrier family 25, member A6 | gi 119936593,gi 151557097,gi 32189336 | 32,860.40 | 100.00% | 10 | 11 | 55 | 0.54% | 33.60% | DFLAGGI<br>AAAISK         | 5.33 | 1,233.68 |
| Control | 6018 | solute carrier family 25, member A6 | gi 119936593,gi 151557097,gi 32189336 | 32,860.40 | 100.00% | 10 | 11 | 55 | 0.54% | 33.60% | EQGVLS<br>FWR             | 2.51 | 1,121.57 |
| Control | 6018 | solute carrier family 25, member A6 | gi 119936593,gi 151557097,gi 32189336 | 32,860.40 | 100.00% | 10 | 11 | 55 | 0.54% | 33.60% | GLYQGF<br>NVSVQG<br>IIIYR | 3.59 | 1,927.04 |
| Control | 6018 | solute carrier family 25, member A6 | gi 119936593,gi 151557097,gi 32189336 | 32,860.40 | 100.00% | 10 | 11 | 55 | 0.54% | 33.60% | GMGGAF<br>VLVLYD<br>ELK   | 4.74 | 1,627.84 |
| Control | 6018 | solute carrier family 25, member A6 | gi 119936593,gi 151557097,gi 32189336 | 32,860.40 | 100.00% | 10 | 11 | 55 | 0.54% | 33.60% | GMGGAF<br>VLVLYD<br>ELKK  | 4.7  | 1,755.94 |
| Control | 6018 | solute carrier family 25, member A6 | gi 119936593,gi 151557097,gi 32189336 | 32,860.40 | 100.00% | 10 | 11 | 55 | 0.54% | 33.60% | LLLQVQ<br>HASK            | 3.02 | 1,136.68 |

|         |      |                                                                             |                                       |            |         |    |    |    |       |        |                                 |          |
|---------|------|-----------------------------------------------------------------------------|---------------------------------------|------------|---------|----|----|----|-------|--------|---------------------------------|----------|
| Control | 6018 | solute carrier family 25, member A6                                         | gi 119936593,gi 151557097,gi 32189336 | 32,860.40  | 100.00% | 10 | 11 | 55 | 0.54% | 33.60% | QIFLGGV DKR 2.35                | 1,132.65 |
| Control | 6018 | solute carrier family 25, member A6                                         | gi 119936593,gi 151557097,gi 32189336 | 32,860.40  | 100.00% | 10 | 11 | 55 | 0.54% | 33.60% | YFPTQA LNFAFK 3.65              | 1,446.74 |
| Control | 6018 | solute carrier family 25, member A6                                         | gi 119936593,gi 151557097,gi 32189336 | 32,860.40  | 100.00% | 10 | 11 | 55 | 0.54% | 33.60% | YFPTQA LNFAFK DK 4.14           | 1,689.86 |
| Control | 6018 | PREDICTED: insulin-like growth factor 1 receptor                            | gi 119913553                          | 135,693.80 | 100.00% | 2  | 2  | 2  | 0.02% | 3.24%  | ELGQGS FGMVYE GVAK 4.2          | 1,687.80 |
| Control | 6018 | PREDICTED: insulin-like growth factor 1 receptor                            | gi 119913553                          | 135,693.80 | 100.00% | 2  | 2  | 2  | 0.02% | 3.24%  | GNNIASE LENFMG LIEVVTG YVK 5.26 | 2,513.26 |
| Control | 6018 | PREDICTED: similar to filamin B, beta (actin binding protein 278) isoform 7 | gi 194677296                          | 277,977.20 | 100.00% | 16 | 17 | 17 | 0.17% | 11.00% | APLNVQ FSSPPG DAVK 5.28         | 1,683.87 |
| Control | 6018 | PREDICTED: similar to filamin B, beta (actin binding protein 278) isoform 7 | gi 194677296                          | 277,977.20 | 100.00% | 16 | 17 | 17 | 0.17% | 11.00% | DLDIIDN YDYSHT VK 4.12          | 1,810.85 |
| Control | 6018 | PREDICTED: similar to filamin B, beta (actin binding protein 278) isoform 7 | gi 194677296                          | 277,977.20 | 100.00% | 16 | 17 | 17 | 0.17% | 11.00% | EAFNTK PNVFTV VTR 2.95          | 1,722.92 |

|         |      |                                                                                                         |                  |            |         |    |    |    |       |        |                                                            |          |
|---------|------|---------------------------------------------------------------------------------------------------------|------------------|------------|---------|----|----|----|-------|--------|------------------------------------------------------------|----------|
| Control | 6018 | PREDIC<br>TED:<br>similar to<br>filamin<br>B, beta<br>(actin<br>binding<br>protein<br>278)<br>isoform 7 | gi 1946772<br>96 | 277,977.20 | 100.00% | 16 | 17 | 17 | 0.17% | 11.00% | GAGIGG 4.75<br>LGITVEG<br>PSESK                            | 1,628.85 |
| Control | 6018 | PREDIC<br>TED:<br>similar to<br>filamin<br>B, beta<br>(actin<br>binding<br>protein<br>278)<br>isoform 7 | gi 1946772<br>96 | 277,977.20 | 100.00% | 16 | 17 | 17 | 0.17% | 11.00% | GFQDGV 3.73<br>YAFEYY<br>PSTQGK                            | 2,056.93 |
| Control | 6018 | PREDIC<br>TED:<br>similar to<br>filamin<br>B, beta<br>(actin<br>binding<br>protein<br>278)<br>isoform 7 | gi 1946772<br>96 | 277,977.20 | 100.00% | 16 | 17 | 17 | 0.17% | 11.00% | GLVEPV 6.24<br>NVVDNG<br>DGTHTV<br>TYTPSQ<br>EGPYMV<br>SVK | 3,505.68 |
| Control | 6018 | PREDIC<br>TED:<br>similar to<br>filamin<br>B, beta<br>(actin<br>binding<br>protein<br>278)<br>isoform 7 | gi 1946772<br>96 | 277,977.20 | 100.00% | 16 | 17 | 17 | 0.17% | 11.00% | GQHVTG 4.55<br>SPFQFTV<br>GPLGEG<br>GAHK                   | 2,308.15 |
| Control | 6018 | PREDIC<br>TED:<br>similar to<br>filamin<br>B, beta<br>(actin<br>binding<br>protein<br>278)<br>isoform 7 | gi 1946772<br>96 | 277,977.20 | 100.00% | 16 | 17 | 17 | 0.17% | 11.00% | IFAQDG 4.33<br>DGQPIDI<br>QMK                              | 1,791.86 |
| Control | 6018 | PREDIC<br>TED:<br>similar to<br>filamin<br>B, beta<br>(actin<br>binding<br>protein<br>278)<br>isoform 7 | gi 1946772<br>96 | 277,977.20 | 100.00% | 16 | 17 | 17 | 0.17% | 11.00% | IVGPGLG 2.66<br>SGVR                                       | 1,011.59 |
| Control | 6018 | PREDIC<br>TED:<br>similar to<br>filamin<br>B, beta<br>(actin<br>binding<br>protein<br>278)<br>isoform 7 | gi 1946772<br>96 | 277,977.20 | 100.00% | 16 | 17 | 17 | 0.17% | 11.00% | LIALLEV 2.97<br>LSQK                                       | 1,226.77 |

|         |      |                                                                                    |                           |            |         |    |    |    |       |        |                                            |      |          |
|---------|------|------------------------------------------------------------------------------------|---------------------------|------------|---------|----|----|----|-------|--------|--------------------------------------------|------|----------|
| Control | 6018 | PREDIC TED: 96<br>similar to filamin B, beta (actin binding protein 278) isoform 7 | gi 1946772                | 277,977.20 | 100.00% | 16 | 17 | 17 | 0.17% | 11.00% | SPFEVQ<br>VGPEAG<br>MQK                    | 4.75 | 1,619.77 |
| Control | 6018 | PREDIC TED: 96<br>similar to filamin B, beta (actin binding protein 278) isoform 7 | gi 1946772                | 277,977.20 | 100.00% | 16 | 17 | 17 | 0.17% | 11.00% | SPFTVG<br>VAAPLD<br>LSR                    | 3.38 | 1,529.83 |
| Control | 6018 | PREDIC TED: 96<br>similar to filamin B, beta (actin binding protein 278) isoform 7 | gi 1946772                | 277,977.20 | 100.00% | 16 | 17 | 17 | 0.17% | 11.00% | VLFASQ<br>EIPTSPF<br>R                     | 3.74 | 1,591.85 |
| Control | 6018 | PREDIC TED: 96<br>similar to filamin B, beta (actin binding protein 278) isoform 7 | gi 1946772                | 277,977.20 | 100.00% | 16 | 17 | 17 | 0.17% | 11.00% | VTASGP<br>GLSTYG<br>VPASLP<br>VEFAIDA<br>R | 4.05 | 2,575.34 |
| Control | 6018 | PREDIC TED: 96<br>similar to filamin B, beta (actin binding protein 278) isoform 7 | gi 1946772                | 277,977.20 | 100.00% | 16 | 17 | 17 | 0.17% | 11.00% | YMIGVT<br>YGGDDI<br>PLSPYR                 | 4.12 | 2,032.97 |
| Control | 6018 | PREDIC TED: 96<br>similar to filamin B, beta (actin binding protein 278) isoform 7 | gi 1946772                | 277,977.20 | 100.00% | 16 | 17 | 17 | 0.17% | 11.00% | YTPTQQ<br>GNMQVL<br>VTYGGD<br>PIPK         | 4.13 | 2,423.19 |
| Control | 6018 | plasma membran e calcium-55 transporti ng ATPase                                   | gi 1458276<br>2,gi 278072 | 134,738.10 | 99.80%  | 2  | 2  | 2  | 0.02% | 5.90%  | ADVGF<br>MGIAGT<br>DVAK                    | 4.36 | 1,538.75 |

|         |      |                                                                                                                                    |                                                   |            |         |   |   |   |       |        |                                             |      |          |
|---------|------|------------------------------------------------------------------------------------------------------------------------------------|---------------------------------------------------|------------|---------|---|---|---|-------|--------|---------------------------------------------|------|----------|
| Control | 6018 | plasma<br>membran<br>e calcium-55<br>transporti<br>ng<br>ATPase                                                                    | gi 1458276<br>2,gi 278072                         | 134,738.10 | 99.80%  | 2 | 2 | 2 | 0.02% | 5.90%  | EAGHGT<br>QKEEIP<br>EELAED<br>VEEIDH<br>AER | 3.09 | 3,189.45 |
| Control | 6018 | plasma<br>membran<br>e calcium-55<br>transporti<br>ng<br>ATPase                                                                    | gi 1458276<br>2,gi 278072                         | 134,738.10 | 99.80%  | 2 | 2 | 2 | 0.02% | 5.90%  | EASDIL<br>TDDNFT<br>SIVK                    | 4    | 1,880.95 |
| Control | 6018 | plasma<br>membran<br>e calcium-55<br>transporti<br>ng<br>ATPase                                                                    | gi 1458276<br>2,gi 278072                         | 134,738.10 | 99.80%  | 2 | 2 | 2 | 0.02% | 5.90%  | GHDSTV<br>SEQR                              | 2.94 | 1,204.62 |
| Control | 6018 | PREDIC<br>TED:<br>similar to<br>Ras<br>GTPase-<br>activating-<br>like<br>protein<br>IQGAP1<br>(p195)                               | gi 1946767<br>12                                  | 182,771.10 | 99.90%  | 2 | 2 | 2 | 0.02% | 2.06%  | IIGNLLY<br>YR                               | 2.91 | 1,124.65 |
| Control | 6018 | PREDIC<br>TED:<br>similar to<br>Ras<br>GTPase-<br>activating-<br>like<br>protein<br>IQGAP1<br>(p195)                               | gi 1946767<br>12                                  | 182,771.10 | 99.90%  | 2 | 2 | 2 | 0.02% | 2.06%  | VNLLAA<br>LTNIDLA<br>LEQGS<br>PALFK         | 5.43 | 2,482.39 |
| Control | 6018 | RecName<br>:<br>Full=Vesi<br>cle<br>transport<br>protein<br>GOT1B;<br>AltName:<br>Full=Gol<br>gi<br>transport<br>1<br>homolog<br>B | gi 1099397<br>23,gi 11405<br>3223,gi 825<br>71709 | 15,408.60  | 100.00% | 3 | 3 | 3 | 0.03% | 20.30% | RVPVLG<br>SLLNLPG<br>IR                     | 3.73 | 1,604.00 |
| Control | 6018 | RecName<br>:<br>Full=Vesi<br>cle<br>transport<br>protein<br>GOT1B;<br>AltName:<br>Full=Gol<br>gi<br>transport<br>1<br>homolog<br>B | gi 1099397<br>23,gi 11405<br>3223,gi 825<br>71709 | 15,408.60  | 100.00% | 3 | 3 | 3 | 0.03% | 20.30% | SFVDKV<br>GESNNM<br>V                       | 3.54 | 1,441.66 |

|         |      |                                                                                           |                                                 |            |         |   |   |   |       |        |                                     |      |          |
|---------|------|-------------------------------------------------------------------------------------------|-------------------------------------------------|------------|---------|---|---|---|-------|--------|-------------------------------------|------|----------|
| Control | 6018 | RecName : Full=Vesicle transport protein GOT1B; AltName: Full=Golgi transport 1 homolog B | gi 109939723,gi 114053223,gi 82571709           | 15,408.60  | 100.00% | 3 | 3 | 3 | 0.03% | 20.30% | VPVLGS LLNLPGIR                     | 3.9  | 1,447.90 |
| Control | 6018 | UNC84B protein                                                                            | gi 151553917,gi 156121283                       | 81,429.80  | 100.00% | 4 | 5 | 6 | 0.06% | 6.04%  | IRPTAVT LEHVPK                      | 3.71 | 1,460.86 |
| Control | 6018 | UNC84B protein                                                                            | gi 151553917,gi 156121283                       | 81,429.80  | 100.00% | 4 | 5 | 6 | 0.06% | 6.04%  | LEGQLA GLR                          | 2.79 | 956.5525 |
| Control | 6018 | UNC84B protein                                                                            | gi 151553917,gi 156121283                       | 81,429.80  | 100.00% | 4 | 5 | 6 | 0.06% | 6.04%  | LEGQLA GLRQEL AALTLK                | 3.51 | 1,924.12 |
| Control | 6018 | UNC84B protein                                                                            | gi 151553917,gi 156121283                       | 81,429.80  | 100.00% | 4 | 5 | 6 | 0.06% | 6.04%  | SEHQD SEDLFK K                      | 3.78 | 1,590.74 |
| Control | 6018 | heat shock protein beta-1                                                                 | gi 71037405,gi 74354863,gi 85542053             | 22,375.10  | 100.00% | 5 | 5 | 5 | 0.05% | 44.30% | KYTLPP GVDPTL VSSSLSP EGTLTV EAPLPK | 4.07 | 3,193.72 |
| Control | 6018 | heat shock protein beta-1                                                                 | gi 71037405,gi 74354863,gi 85542053             | 22,375.10  | 100.00% | 5 | 5 | 5 | 0.05% | 44.30% | LFDQAF GLPR                         | 3.39 | 1,163.62 |
| Control | 6018 | heat shock protein beta-1                                                                 | gi 71037405,gi 74354863,gi 85542053             | 22,375.10  | 100.00% | 5 | 5 | 5 | 0.05% | 44.30% | QLSSGV SEIQQTA DR                   | 4.53 | 1,618.80 |
| Control | 6018 | heat shock protein beta-1                                                                 | gi 71037405,gi 74354863,gi 85542053             | 22,375.10  | 100.00% | 5 | 5 | 5 | 0.05% | 44.30% | SATQSA EITIPVTF QAR                 | 2.62 | 1,819.95 |
| Control | 6018 | heat shock protein beta-1                                                                 | gi 71037405,gi 74354863,gi 85542053             | 22,375.10  | 100.00% | 5 | 5 | 5 | 0.05% | 44.30% | VSLDVN HFAPEEL TVK                  | 2.67 | 1,797.94 |
| Control | 6018 | ribosomal protein L4                                                                      | gi 61553010,gi 62460480,gi 73917531,gi 74267758 | 47,395.70  | 100.00% | 3 | 4 | 5 | 0.05% | 11.40% | APIRPDI VNFVHT NLR                  | 2.43 | 1,862.04 |
| Control | 6018 | ribosomal protein L4                                                                      | gi 61553010,gi 62460480,gi 73917531,gi 74267758 | 47,395.70  | 100.00% | 3 | 4 | 5 | 0.05% | 11.40% | IEEVPEL PLVVED KVEGYK K             | 1.9  | 2,313.26 |
| Control | 6018 | ribosomal protein L4                                                                      | gi 61553010,gi 62460480,gi 73917531,gi 74267758 | 47,395.70  | 100.00% | 3 | 4 | 5 | 0.05% | 11.40% | NIPGITL LNVSK                       | 2.44 | 1,268.76 |
| Control | 6018 | MYO1C protein                                                                             | gi 146186525,gi 147906576,gi 397403,gi 90109868 | 118,133.10 | 100.00% | 4 | 4 | 4 | 0.04% | 5.25%  | LLGVEG STLR                         | 2.61 | 1,044.60 |

|         |      |                                         |                                                 |            |         |   |   |    |       |        |                                      |      |          |
|---------|------|-----------------------------------------|-------------------------------------------------|------------|---------|---|---|----|-------|--------|--------------------------------------|------|----------|
| Control | 6018 | MYO1C protein                           | gi 146186525,gi 147906576,gi 397403,gi 90109868 | 118,133.10 | 100.00% | 4 | 4 | 4  | 0.04% | 5.25%  | LLQSNP<br>VLEAFG<br>NAK              | 4.65 | 1,600.87 |
| Control | 6018 | MYO1C protein                           | gi 146186525,gi 147906576,gi 397403,gi 90109868 | 118,133.10 | 100.00% | 4 | 4 | 4  | 0.04% | 5.25%  | MSLLEL<br>VEILK                      | 3.43 | 1,303.75 |
| Control | 6018 | MYO1C protein                           | gi 146186525,gi 147906576,gi 397403,gi 90109868 | 118,133.10 | 100.00% | 4 | 4 | 4  | 0.04% | 5.25%  | VLQALG<br>SEPIQYA<br>VPVVK           | 4.01 | 1,911.10 |
| Control | 6018 | PREDICTED: NOMO3-like protein isoform 2 | gi 119916799,gi 119916801                       | 134,079.40 | 100.00% | 6 | 6 | 6  | 0.06% | 8.43%  | EDGSFSF<br>YSLPSG<br>GYTVIPF<br>YR   | 3.19 | 2,489.17 |
| Control | 6018 | PREDICTED: NOMO3-like protein isoform 2 | gi 119916799,gi 119916801                       | 134,079.40 | 100.00% | 6 | 6 | 6  | 0.06% | 8.43%  | GQPLGP<br>AGVQVS<br>LR               | 3.13 | 1,378.78 |
| Control | 6018 | PREDICTED: NOMO3-like protein isoform 2 | gi 119916799,gi 119916801                       | 134,079.40 | 100.00% | 6 | 6 | 6  | 0.06% | 8.43%  | SQYDFV<br>LPQVSFT<br>AAGYHK          | 2.87 | 2,158.06 |
| Control | 6018 | PREDICTED: NOMO3-like protein isoform 2 | gi 119916799,gi 119916801                       | 134,079.40 | 100.00% | 6 | 6 | 6  | 0.06% | 8.43%  | SSIDSEP<br>ALVLGP<br>LK              | 3.13 | 1,525.85 |
| Control | 6018 | PREDICTED: NOMO3-like protein isoform 2 | gi 119916799,gi 119916801                       | 134,079.40 | 100.00% | 6 | 6 | 6  | 0.06% | 8.43%  | VLNGPE<br>GEGVPD<br>AVVTLN<br>SQIK   | 3.34 | 2,236.18 |
| Control | 6018 | PREDICTED: NOMO3-like protein isoform 2 | gi 119916799,gi 119916801                       | 134,079.40 | 100.00% | 6 | 6 | 6  | 0.06% | 8.43%  | VQVMVP<br>EAETR                      | 3    | 1,274.64 |
| Control | 6018 | vesicle-associated membrane protein 3   | gi 114052342,gi 122136203,gi 86822282           | 11,517.30  | 100.00% | 4 | 7 | 12 | 0.12% | 39.40% | ADALQA<br>GASQFE<br>TSAAK            | 5.38 | 1,665.81 |
| Control | 6018 | vesicle-associated membrane protein 3   | gi 114052342,gi 122136203,gi 86822282           | 11,517.30  | 100.00% | 4 | 7 | 12 | 0.12% | 39.40% | LQQTQN<br>QVDEVV<br>DIMR             | 5.39 | 1,931.95 |
| Control | 6018 | vesicle-associated membrane protein 3   | gi 114052342,gi 122136203,gi 86822282           | 11,517.30  | 100.00% | 4 | 7 | 12 | 0.12% | 39.40% | LSELDD<br>RADALQ<br>AGASQF<br>ETSAAK | 5.97 | 2,494.21 |

|         |      |                                                                              |                                                                 |           |         |   |   |    |       |        |                                             |      |          |
|---------|------|------------------------------------------------------------------------------|-----------------------------------------------------------------|-----------|---------|---|---|----|-------|--------|---------------------------------------------|------|----------|
| Control | 6018 | vesicle-associate<br>d<br>membrane<br>protein<br>3                           | gi 1140523<br>42,gi 12213<br>6203,gi 868<br>22282               | 11,517.30 | 100.00% | 4 | 7 | 12 | 0.12% | 39.40% | RLQQTQ<br>NQVDEV<br>VDIMR                   | 3.93 | 2,072.06 |
| Control | 6018 | transmembrane<br>emp24<br>protein<br>transport<br>domain<br>containin<br>g 9 | gi 5985849<br>1,gi 742679<br>97,gi 77736<br>600,gi 8117<br>5032 | 27,280.40 | 100.00% | 7 | 9 | 15 | 0.15% | 33.60% | DKLSEL<br>QLR                               | 2.93 | 1,101.63 |
| Control | 6018 | transmembrane<br>emp24<br>protein<br>transport<br>domain<br>containin<br>g 9 | gi 5985849<br>1,gi 742679<br>97,gi 77736<br>600,gi 8117<br>5032 | 27,280.40 | 100.00% | 7 | 9 | 15 | 0.15% | 33.60% | EEYQPA<br>TPGLGM<br>FVEVKD<br>PEDK          | 3.06 | 2,495.17 |
| Control | 6018 | transmembrane<br>emp24<br>protein<br>transport<br>domain<br>containin<br>g 9 | gi 5985849<br>1,gi 742679<br>97,gi 77736<br>600,gi 8117<br>5032 | 27,280.40 | 100.00% | 7 | 9 | 15 | 0.15% | 33.60% | EEYQPA<br>TPGLGM<br>FVEVKD<br>PEDKVIL<br>AR | 2.98 | 3,047.54 |
| Control | 6018 | transmembrane<br>emp24<br>protein<br>transport<br>domain<br>containin<br>g 9 | gi 5985849<br>1,gi 742679<br>97,gi 77736<br>600,gi 8117<br>5032 | 27,280.40 | 100.00% | 7 | 9 | 15 | 0.15% | 33.60% | FSLFAG<br>GMLR                              | 3.21 | 1,114.57 |
| Control | 6018 | transmembrane<br>emp24<br>protein<br>transport<br>domain<br>containin<br>g 9 | gi 5985849<br>1,gi 742679<br>97,gi 77736<br>600,gi 8117<br>5032 | 27,280.40 | 100.00% | 7 | 9 | 15 | 0.15% | 33.60% | QLVEVQ<br>EQIQK                             | 4.36 | 1,341.74 |
| Control | 6018 | transmembrane<br>emp24<br>protein<br>transport<br>domain<br>containin<br>g 9 | gi 5985849<br>1,gi 742679<br>97,gi 77736<br>600,gi 8117<br>5032 | 27,280.40 | 100.00% | 7 | 9 | 15 | 0.15% | 33.60% | QREEYQ<br>PATPGL<br>GMFVEV<br>KDPEDK        | 3.45 | 2,779.32 |
| Control | 6018 | transmembrane<br>emp24<br>protein<br>transport<br>domain<br>containin<br>g 9 | gi 5985849<br>1,gi 742679<br>97,gi 77736<br>600,gi 8117<br>5032 | 27,280.40 | 100.00% | 7 | 9 | 15 | 0.15% | 33.60% | VHLDIQ<br>VGEHAN<br>DYAEIA<br>AK            | 3.12 | 2,193.09 |
| Control | 6018 | KRT4<br>protein<br>68                                                        | gi 1340247<br>68                                                | 58,029.30 | 100.00% | 3 | 3 | 10 | 0.10% | 5.65%  | LALDIEI<br>ATYR                             | 3.59 | 1,277.71 |
| Control | 6018 | KRT4<br>protein<br>68                                                        | gi 1340247<br>68                                                | 58,029.30 | 100.00% | 3 | 3 | 10 | 0.10% | 5.65%  | NEISELN<br>R                                | 3.49 | 974.4901 |
| Control | 6018 | KRT4<br>protein<br>68                                                        | gi 1340247<br>68                                                | 58,029.30 | 100.00% | 3 | 3 | 10 | 0.10% | 5.65%  | NLDLDSI<br>IAEVR                            | 3.35 | 1,357.73 |



|         |      |                                         |                                   |           |         |    |    |    |       |        |                                                |      |          |
|---------|------|-----------------------------------------|-----------------------------------|-----------|---------|----|----|----|-------|--------|------------------------------------------------|------|----------|
| Control | 6018 | RAB1A, member 48<br>RAS oncogene family | gi 1204194                        | 22,660.40 | 100.00% | 4  | 5  | 11 | 0.11% | 36.10% | EFADSL<br>GIPFLET<br>SAK                       | 3.59 | 1,724.87 |
| Control | 6018 | RAB1A, member 48<br>RAS oncogene family | gi 1204194                        | 22,660.40 | 100.00% | 4  | 5  | 11 | 0.11% | 36.10% | FADDTY<br>TESYISTI<br>GVDFK                    | 2.84 | 2,172.00 |
| Control | 6018 | RAB1A, member 48<br>RAS oncogene family | gi 1204194                        | 22,660.40 | 100.00% | 4  | 5  | 11 | 0.11% | 36.10% | LLLIGDS<br>GVGK                                | 3.4  | 1,071.64 |
| Control | 6018 | RAB1A, member 48<br>RAS oncogene family | gi 1204194                        | 22,660.40 | 100.00% | 4  | 5  | 11 | 0.11% | 36.10% | LQIWDT<br>AGQER                                | 2.62 | 1,316.66 |
| Control | 6018 | RAB1A, member 48<br>RAS oncogene family | gi 1204194                        | 22,660.40 | 100.00% | 4  | 5  | 11 | 0.11% | 36.10% | NATNVE<br>QSFMTM<br>AAEIK                      | 2.75 | 1,900.88 |
| Control | 6018 | LMNB1 protein                           | gi 1544256<br>05,gi 15707<br>4106 | 66,404.60 | 100.00% | 13 | 19 | 26 | 0.25% | 31.90% | ALYETE<br>LADAR                                | 3.63 | 1,251.62 |
| Control | 6018 | LMNB1 protein                           | gi 1544256<br>05,gi 15707<br>4106 | 66,404.60 | 100.00% | 13 | 19 | 26 | 0.25% | 31.90% | DQMQQ<br>QLNDYE<br>QLLDVK                      | 3.95 | 2,123.99 |
| Control | 6018 | LMNB1 protein                           | gi 1544256<br>05,gi 15707<br>4106 | 66,404.60 | 100.00% | 13 | 19 | 26 | 0.25% | 31.90% | FKAEHD<br>QLLLNY<br>AK                         | 4.48 | 1,689.90 |
| Control | 6018 | LMNB1 protein                           | gi 1544256<br>05,gi 15707<br>4106 | 66,404.60 | 100.00% | 13 | 19 | 26 | 0.25% | 31.90% | IESLSSQ<br>LSNLQK                              | 3.87 | 1,446.78 |
| Control | 6018 | LMNB1 protein                           | gi 1544256<br>05,gi 15707<br>4106 | 66,404.60 | 100.00% | 13 | 19 | 26 | 0.25% | 31.90% | IQELEDL<br>LAK                                 | 3.02 | 1,171.66 |
| Control | 6018 | LMNB1 protein                           | gi 1544256<br>05,gi 15707<br>4106 | 66,404.60 | 100.00% | 13 | 19 | 26 | 0.25% | 31.90% | LAQALH<br>EMREQH<br>DAQVK                      | 2.27 | 2,020.00 |
| Control | 6018 | LMNB1 protein                           | gi 1544256<br>05,gi 15707<br>4106 | 66,404.60 | 100.00% | 13 | 19 | 26 | 0.25% | 31.90% | LREYEA<br>ALNSK                                | 3.83 | 1,293.68 |
| Control | 6018 | LMNB1 protein                           | gi 1544256<br>05,gi 15707<br>4106 | 66,404.60 | 100.00% | 13 | 19 | 26 | 0.25% | 31.90% | LSSEMN<br>TSTVNS<br>AR                         | 4.42 | 1,496.70 |
| Control | 6018 | LMNB1 protein                           | gi 1544256<br>05,gi 15707<br>4106 | 66,404.60 | 100.00% | 13 | 19 | 26 | 0.25% | 31.90% | LYKEEL<br>EQTYHA<br>K                          | 3.69 | 1,651.83 |
| Control | 6018 | LMNB1 protein                           | gi 1544256<br>05,gi 15707<br>4106 | 66,404.60 | 100.00% | 13 | 19 | 26 | 0.25% | 31.90% | MRIESLS<br>SQLSNL<br>QK                        | 3.37 | 1,749.92 |
| Control | 6018 | LMNB1 protein                           | gi 1544256<br>05,gi 15707<br>4106 | 66,404.60 | 100.00% | 13 | 19 | 26 | 0.25% | 31.90% | NMYEEE<br>INETR                                | 3.4  | 1,443.61 |
| Control | 6018 | LMNB1 protein                           | gi 1544256<br>05,gi 15707<br>4106 | 66,404.60 | 100.00% | 13 | 19 | 26 | 0.25% | 31.90% | SLESdle<br>DLKDQI<br>AQLEAS<br>LAAAK           | 5.68 | 2,558.32 |
| Control | 6018 | LMNB1 protein                           | gi 1544256<br>05,gi 15707<br>4106 | 66,404.60 | 100.00% | 13 | 19 | 26 | 0.25% | 31.90% | TTIPEEE<br>EEEEEA<br>AEVAVE<br>EELFHQ<br>QGAPR | 4.26 | 3,425.55 |

|         |      |                                                          |                                                                                                                                                            |           |         |   |   |   |       |        |                                      |          |
|---------|------|----------------------------------------------------------|------------------------------------------------------------------------------------------------------------------------------------------------------------|-----------|---------|---|---|---|-------|--------|--------------------------------------|----------|
| Control | 6018 | RecName<br>:<br>Full=40S<br>ribosomal<br>protein<br>S20  | gi 1088609<br>55,gi 61822<br>677,gi 7358<br>7131,gi 777<br>35823                                                                                           | 13,355.00 | 100.00% | 2 | 4 | 4 | 0.04% | 12.60% | DTGKTP 4.05<br>VEPEVAI<br>HR         | 1,648.87 |
| Control | 6018 | RecName<br>:<br>Full=40S<br>ribosomal<br>protein<br>S20  | gi 1088609<br>55,gi 61822<br>677,gi 7358<br>7131,gi 777<br>35823                                                                                           | 13,355.00 | 100.00% | 2 | 4 | 4 | 0.04% | 12.60% | TPVEPE 4.26<br>VAIHR                 | 1,247.67 |
| Control | 6018 | SACM1L<br>protein<br>S20                                 | gi 1515543<br>72,gi 15612<br>0909,gi 167<br>016544                                                                                                         | 67,077.30 | 99.80%  | 2 | 2 | 2 | 0.02% | 4.43%  | LSNTSPE 3.58<br>FQEMSL<br>LER        | 1,896.90 |
| Control | 6018 | SACM1L<br>protein<br>S20                                 | gi 1515543<br>72,gi 15612<br>0909,gi 167<br>016544                                                                                                         | 67,077.30 | 99.80%  | 2 | 2 | 2 | 0.02% | 4.43%  | TNVIQSL 2.9<br>LAR                   | 1,114.66 |
| Control | 6018 | Interleukin<br>enhancer<br>binding<br>factor 2,<br>45kDa | gi 8340544<br>2,gi 840003<br>47                                                                                                                            | 43,068.60 | 99.80%  | 2 | 2 | 2 | 0.02% | 8.72%  | ILPTLEA 3.86<br>VAALGN<br>K          | 1,409.84 |
| Control | 6018 | Interleukin<br>enhancer<br>binding<br>factor 2,<br>45kDa | gi 8340544<br>2,gi 840003<br>47                                                                                                                            | 43,068.60 | 99.80%  | 2 | 2 | 2 | 0.02% | 8.72%  | NQDLAP 2.7<br>NSAEQA<br>SILSLVT<br>K | 2,099.10 |
| Control | 6018 | CALM3<br>protein                                         | gi 1113085<br>39,gi 11405<br>3089,gi 115<br>305083,gi 1<br>57831834,gi 1<br>15787966<br>9,gi 194671<br>098,gi 2818<br>9857,gi 490<br>37473,gi 86<br>822265 | 19,973.60 | 99.80%  | 2 | 3 | 5 | 0.05% | 18.10% | EAFSLFD 4.71<br>KDGDGT<br>ITTK       | 1,844.89 |
| Control | 6018 | CALM3<br>protein                                         | gi 1113085<br>39,gi 11405<br>3089,gi 115<br>305083,gi 1<br>57831834,gi 1<br>15787966<br>9,gi 194671<br>098,gi 2818<br>9857,gi 490<br>37473,gi 86<br>822265 | 19,973.60 | 99.80%  | 2 | 3 | 5 | 0.05% | 18.10% | VFDKDG 4.76<br>NGYISA<br>AELR        | 1,754.87 |

|         |      |                                                                                                                                                                                                                                                                                                   |                                                         |           |         |   |   |   |       |        |                                     |      |          |
|---------|------|---------------------------------------------------------------------------------------------------------------------------------------------------------------------------------------------------------------------------------------------------------------------------------------------------|---------------------------------------------------------|-----------|---------|---|---|---|-------|--------|-------------------------------------|------|----------|
| Control | 6018 | RecName<br>:<br>Full=Cyt<br>ochrome<br>c oxidase<br>polypepti<br>de 7A2,<br>mitochon<br>drial;<br>AltName:<br>Full=Cyt<br>ochrome<br>c oxidase<br>polypepti<br>de VIIa-<br>liver/hear<br>t;<br>Short=Cy<br>tochrome<br>c oxidase<br>subunit<br>VIIa-L;<br>Short=VI<br>IIC;<br>Flags:<br>Precursor | gi 117120.g<br>i 28461241,<br>gi 488158.g<br>i 74354141 | 9,305.40  | 99.80%  | 2 | 3 | 5 | 0.05% | 27.70% | GGIADA<br>LLYR                      | 3.24 | 1,048.58 |
| Control | 6018 | RecName<br>:<br>Full=Cyt<br>ochrome<br>c oxidase<br>polypepti<br>de 7A2,<br>mitochon<br>drial;<br>AltName:<br>Full=Cyt<br>ochrome<br>c oxidase<br>polypepti<br>de VIIa-<br>liver/hear<br>t;<br>Short=Cy<br>tochrome<br>c oxidase<br>subunit<br>VIIa-L;<br>Short=VI<br>IIC;<br>Flags:<br>Precursor | gi 117120.g<br>i 28461241,<br>gi 488158.g<br>i 74354141 | 9,305.40  | 99.80%  | 2 | 3 | 5 | 0.05% | 27.70% | LFQEDN<br>GIPVHLK                   | 3    | 1,509.81 |
| Control | 6018 | SLC25A<br>24<br>protein                                                                                                                                                                                                                                                                           | gi 1487454<br>86.gi 14964<br>2721.gi 167<br>016553      | 53,268.40 | 100.00% | 3 | 4 | 6 | 0.06% | 13.20% | GYVPNL<br>LGIPYA<br>GIDLAV<br>YELLK | 5.9  | 2,604.47 |
| Control | 6018 | SLC25A<br>24<br>protein                                                                                                                                                                                                                                                                           | gi 1487454<br>86.gi 14964<br>2721.gi 167<br>016553      | 53,268.40 | 100.00% | 3 | 4 | 6 | 0.06% | 13.20% | HSTGIDI<br>GDSLTP<br>DEFTED<br>EKK  | 4.65 | 2,547.21 |
| Control | 6018 | SLC25A<br>24<br>protein                                                                                                                                                                                                                                                                           | gi 1487454<br>86.gi 14964<br>2721.gi 167<br>016553      | 53,268.40 | 100.00% | 3 | 4 | 6 | 0.06% | 13.20% | VLPVAVGI<br>SYVVYE<br>NMK           | 2.48 | 1,797.95 |

|         |      |                                                                                                                |                                                                                                                           |           |         |   |   |   |       |        |                                      |      |          |
|---------|------|----------------------------------------------------------------------------------------------------------------|---------------------------------------------------------------------------------------------------------------------------|-----------|---------|---|---|---|-------|--------|--------------------------------------|------|----------|
| Control | 6018 | RecName<br>:<br>Full=NA<br>DPH--<br>cytochro<br>me P450<br>reductase<br>;<br>Short=CP<br>R;<br>Short=P4<br>50R | gi 1102876<br>86,gi 14623<br>1834,gi 742<br>68199,gi 78<br>369374                                                         | 77,249.90 | 100.00% | 3 | 5 | 5 | 0.05% | 8.09%  | ATTPVI<br>MVGPGT<br>GVAPFIG<br>FIQER | 4.31 | 2,474.31 |
| Control | 6018 | RecName<br>:<br>Full=NA<br>DPH--<br>cytochro<br>me P450<br>reductase<br>;<br>Short=CP<br>R;<br>Short=P4<br>50R | gi 1102876<br>86,gi 14623<br>1834,gi 742<br>68199,gi 78<br>369374                                                         | 77,249.90 | 100.00% | 3 | 5 | 5 | 0.05% | 8.09%  | GMAADP<br>EEYDLA<br>DLSSLPE<br>IEK   | 3.43 | 2,409.10 |
| Control | 6018 | RecName<br>:<br>Full=NA<br>DPH--<br>cytochro<br>me P450<br>reductase<br>;<br>Short=CP<br>R;<br>Short=P4<br>50R | gi 1102876<br>86,gi 14623<br>1834,gi 742<br>68199,gi 78<br>369374                                                         | 77,249.90 | 100.00% | 3 | 5 | 5 | 0.05% | 8.09%  | YAVFAL<br>GNK                        | 2.36 | 982.5356 |
| Control | 6018 | TXNDC1<br>0 protein<br>1223                                                                                    | gi 1515540<br>48,gi 15612<br>1223                                                                                         | 51,713.50 | 100.00% | 3 | 4 | 5 | 0.05% | 9.69%  | FQNYLT<br>MDGFLL<br>YELGDT<br>GK     | 3.52 | 2,341.11 |
| Control | 6018 | TXNDC1<br>0 protein<br>1223                                                                                    | gi 1515540<br>48,gi 15612<br>1223                                                                                         | 51,713.50 | 100.00% | 3 | 4 | 5 | 0.05% | 9.69%  | TKDDIII<br>FAHR                      | 3.66 | 1,344.69 |
| Control | 6018 | TXNDC1<br>0 protein<br>1223                                                                                    | gi 1515540<br>48,gi 15612<br>1223                                                                                         | 51,713.50 | 100.00% | 3 | 4 | 5 | 0.05% | 9.69%  | VFFVYIG<br>GESPLK                    | 3.44 | 1,455.79 |
| Control | 6018 | RecName<br>:<br>Full=Hist<br>one<br>H2A.V;<br>AltName:<br>Full=H2<br>A.F/Z                                     | gi 1099400<br>32,gi 16315<br>0,gi 278073<br>73,gi 410,gi<br> 81674301,<br>gi 8167475<br>5,gi 832884<br>07,gi 84000<br>371 | 13,535.20 | 100.00% | 3 | 6 | 8 | 0.08% | 41.40% | ATIAGG<br>GVIPHIH<br>K               | 4.28 | 1,370.79 |
| Control | 6018 | RecName<br>:<br>Full=Hist<br>one<br>H2A.V;<br>AltName:<br>Full=H2<br>A.F/Z                                     | gi 1099400<br>32,gi 16315<br>0,gi 278073<br>73,gi 410,gi<br> 81674301,<br>gi 8167475<br>5,gi 832884<br>07,gi 84000<br>371 | 13,535.20 | 100.00% | 3 | 6 | 8 | 0.08% | 41.40% | GDEELD<br>SLIK                       | 3.46 | 1,118.56 |

|         |      |                                                     |                                                                                           |           |         |    |    |    |       |        |                                               |      |          |
|---------|------|-----------------------------------------------------|-------------------------------------------------------------------------------------------|-----------|---------|----|----|----|-------|--------|-----------------------------------------------|------|----------|
| Control | 6018 | RecName : Full=Histone H2A.V; AltName: Full=H2A.F/Z | gi 109940032,gi 163150,gi 27807373,gi 410,gi 81674301,gi 81674755,gi 83288407,gi 84000371 | 13,535.20 | 100.00% | 3  | 6  | 8  | 0.08% | 41.40% | VGATAA<br>VYSAAIL<br>EYLTAE<br>VLELAG<br>NASK | 5.26 | 2,895.54 |
| Control | 6018 | non-muscle myosin heavy chain                       | gi 3205211                                                                                | 72,354.70 | 100.00% | 10 | 11 | 14 | 0.14% | 24.80% | ALEEAM<br>EQKAEL<br>ER                        | 4.38 | 1,662.80 |
| Control | 6018 | non-muscle myosin heavy chain                       | gi 3205211                                                                                | 72,354.70 | 100.00% | 10 | 11 | 14 | 0.14% | 24.80% | ANLQID<br>QLNTDL<br>NLER                      | 4.75 | 1,869.97 |
| Control | 6018 | non-muscle myosin heavy chain                       | gi 3205211                                                                                | 72,354.70 | 100.00% | 10 | 11 | 14 | 0.14% | 24.80% | ELEDAT<br>ETADAM<br>NR                        | 3.67 | 1,581.67 |
| Control | 6018 | non-muscle myosin heavy chain                       | gi 3205211                                                                                | 72,354.70 | 100.00% | 10 | 11 | 14 | 0.14% | 24.80% | IAQLEEE<br>LEEEQG<br>NTELVN<br>DR             | 5.39 | 2,458.16 |
| Control | 6018 | non-muscle myosin heavy chain                       | gi 3205211                                                                                | 72,354.70 | 100.00% | 10 | 11 | 14 | 0.14% | 24.80% | IAQLEEQ<br>LDNETK<br>ER                       | 3.13 | 1,815.91 |
| Control | 6018 | non-muscle myosin heavy chain                       | gi 3205211                                                                                | 72,354.70 | 100.00% | 10 | 11 | 14 | 0.14% | 24.80% | LKDVL<br>L<br>QVDDER<br>R                     | 2.47 | 1,598.89 |
| Control | 6018 | non-muscle myosin heavy chain                       | gi 3205211                                                                                | 72,354.70 | 100.00% | 10 | 11 | 14 | 0.14% | 24.80% | LQQELD<br>DLLVDL<br>DHQR                      | 3.18 | 1,949.99 |
| Control | 6018 | non-muscle myosin heavy chain                       | gi 3205211                                                                                | 72,354.70 | 100.00% | 10 | 11 | 14 | 0.14% | 24.80% | NAEQYK<br>DQADKA<br>STR                       | 3.5  | 1,724.82 |
| Control | 6018 | non-muscle myosin heavy chain                       | gi 3205211                                                                                | 72,354.70 | 100.00% | 10 | 11 | 14 | 0.14% | 24.80% | QAQQR<br>DELADEI<br>ANSSGK                    | 5.35 | 2,088.98 |
| Control | 6018 | non-muscle myosin heavy chain                       | gi 3205211                                                                                | 72,354.70 | 100.00% | 10 | 11 | 14 | 0.14% | 24.80% | RQLEEA<br>EEEEQR                              | 3.15 | 1,487.71 |

|         |      |                                                                                                                                   |                                                  |           |         |    |    |    |       |        |                                           |      |          |
|---------|------|-----------------------------------------------------------------------------------------------------------------------------------|--------------------------------------------------|-----------|---------|----|----|----|-------|--------|-------------------------------------------|------|----------|
| Control | 6018 | RecName<br>: Full=T-<br>complex<br>protein 1<br>subunit<br>delta;<br>Short=T<br>CP-1-<br>delta;<br>AltName:<br>Full=CC<br>T-delta | gi 1153058<br>39,gi 83406<br>133,gi 8400<br>0361 | 58,190.00 | 99.80%  | 2  | 2  | 2  | 0.02% | 5.35%  | ALIAGG<br>GAPEIEL<br>ALR                  | 3.79 | 1,550.89 |
| Control | 6018 | RecName<br>: Full=T-<br>complex<br>protein 1<br>subunit<br>delta;<br>Short=T<br>CP-1-<br>delta;<br>AltName:<br>Full=CC<br>T-delta | gi 1153058<br>39,gi 83406<br>133,gi 8400<br>0361 | 58,190.00 | 99.80%  | 2  | 2  | 2  | 0.02% | 5.35%  | VIDPATA<br>TSVDLR                         | 3.44 | 1,357.73 |
| Control | 6018 | RPN1<br>protein                                                                                                                   | gi 1267173<br>91,gi 12927<br>7520                | 68,335.00 | 100.00% | 16 | 22 | 42 | 0.41% | 39.40% | AASFLL<br>ALEPELE<br>AR                   | 3.91 | 1,629.88 |
| Control | 6018 | RPN1<br>protein                                                                                                                   | gi 1267173<br>91,gi 12927<br>7520                | 68,335.00 | 100.00% | 16 | 22 | 42 | 0.41% | 39.40% | ENLVEQ<br>HIQDIVV<br>HYTFNK               | 4.13 | 2,326.18 |
| Control | 6018 | RPN1<br>protein                                                                                                                   | gi 1267173<br>91,gi 12927<br>7520                | 68,335.00 | 100.00% | 16 | 22 | 42 | 0.41% | 39.40% | IDHILDA<br>L                              | 2.28 | 909.5042 |
| Control | 6018 | RPN1<br>protein                                                                                                                   | gi 1267173<br>91,gi 12927<br>7520                | 68,335.00 | 100.00% | 16 | 22 | 42 | 0.41% | 39.40% | ISVIVEA<br>VYTHVL<br>QPYPTQI<br>TQSEK     | 3.42 | 2,843.52 |
| Control | 6018 | RPN1<br>protein                                                                                                                   | gi 1267173<br>91,gi 12927<br>7520                | 68,335.00 | 100.00% | 16 | 22 | 42 | 0.41% | 39.40% | LAHLGV<br>QVK                             | 2.69 | 964.5939 |
| Control | 6018 | RPN1<br>protein                                                                                                                   | gi 1267173<br>91,gi 12927<br>7520                | 68,335.00 | 100.00% | 16 | 22 | 42 | 0.41% | 39.40% | LAHLGV<br>QVKGED<br>EEENNL<br>EVR         | 3.56 | 2,378.19 |
| Control | 6018 | RPN1<br>protein                                                                                                                   | gi 1267173<br>91,gi 12927<br>7520                | 68,335.00 | 100.00% | 16 | 22 | 42 | 0.41% | 39.40% | LPVALD<br>PGAK                            | 1.97 | 980.5777 |
| Control | 6018 | RPN1<br>protein                                                                                                                   | gi 1267173<br>91,gi 12927<br>7520                | 68,335.00 | 100.00% | 16 | 22 | 42 | 0.41% | 39.40% | LVDHVF<br>DEQVIDS<br>LTVK                 | 5.37 | 1,957.03 |
| Control | 6018 | RPN1<br>protein                                                                                                                   | gi 1267173<br>91,gi 12927<br>7520                | 68,335.00 | 100.00% | 16 | 22 | 42 | 0.41% | 39.40% | NIQVDSP<br>YEISR                          | 3.9  | 1,420.71 |
| Control | 6018 | RPN1<br>protein                                                                                                                   | gi 1267173<br>91,gi 12927<br>7520                | 68,335.00 | 100.00% | 16 | 22 | 42 | 0.41% | 39.40% | QFVVFE<br>GNHYFY<br>SPYPTK                | 4.05 | 2,223.05 |
| Control | 6018 | RPN1<br>protein                                                                                                                   | gi 1267173<br>91,gi 12927<br>7520                | 68,335.00 | 100.00% | 16 | 22 | 42 | 0.41% | 39.40% | SEDLLD<br>YGPFR                           | 4.12 | 1,311.62 |
| Control | 6018 | RPN1<br>protein                                                                                                                   | gi 1267173<br>91,gi 12927<br>7520                | 68,335.00 | 100.00% | 16 | 22 | 42 | 0.41% | 39.40% | THYIVG<br>YNLPSY<br>EYLYNL<br>GDQYAL<br>K | 5    | 2,997.47 |

|         |      |                                                                                                 |                                                                                 |            |         |    |    |    |       |        |                                                |      |          |
|---------|------|-------------------------------------------------------------------------------------------------|---------------------------------------------------------------------------------|------------|---------|----|----|----|-------|--------|------------------------------------------------|------|----------|
| Control | 6018 | RPN1<br>protein                                                                                 | gi 1267173<br>91.gi 12927<br>7520                                               | 68,335.00  | 100.00% | 16 | 22 | 42 | 0.41% | 39.40% | TVDLSS<br>HLAK                                 | 3.11 | 1,070.58 |
| Control | 6018 | RPN1<br>protein                                                                                 | gi 1267173<br>91.gi 12927<br>7520                                               | 68,335.00  | 100.00% | 16 | 22 | 42 | 0.41% | 39.40% | VHSENN<br>SPFLTIT<br>SMTR                      | 4.62 | 1,949.94 |
| Control | 6018 | RPN1<br>protein                                                                                 | gi 1267173<br>91.gi 12927<br>7520                                               | 68,335.00  | 100.00% | 16 | 22 | 42 | 0.41% | 39.40% | VTAEVV<br>LAHAGS<br>GSSPR                      | 4.38 | 1,637.86 |
| Control | 6018 | RPN1<br>protein                                                                                 | gi 1267173<br>91.gi 12927<br>7520                                               | 68,335.00  | 100.00% | 16 | 22 | 42 | 0.41% | 39.40% | YDYQRQ<br>PDSGVS<br>SVR                        | 3.58 | 1,756.82 |
| Control | 6018 | acyl-<br>Coenzym<br>e A<br>dehydrog<br>enase,<br>very long<br>chain<br>isoform 1<br>precursor   | gi 1462318<br>22.gi 16033<br>2360.gi 278<br>06205.gi 74<br>267810.gi 9<br>30358 | 70,632.20  | 99.80%  | 2  | 2  | 2  | 0.02% | 3.97%  | DIINEQF<br>LLQR                                | 3.37 | 1,388.75 |
| Control | 6018 | acyl-<br>Coenzym<br>e A<br>dehydrog<br>enase,<br>very long<br>chain<br>isoform 1<br>precursor   | gi 1462318<br>22.gi 16033<br>2360.gi 278<br>06205.gi 74<br>267810.gi 9<br>30358 | 70,632.20  | 99.80%  | 2  | 2  | 2  | 0.02% | 3.97%  | VPAENV<br>LGEVGG<br>GFK                        | 4.7  | 1,472.77 |
| Control | 6018 | RecName<br>:<br>Full=60S<br>ribosomal<br>protein<br>L8                                          | gi 1088609<br>41.gi 15442<br>6156.gi 742<br>67654.gi 77<br>736197               | 28,006.80  | 99.90%  | 2  | 3  | 3  | 0.03% | 17.90% | AQLNIG<br>NVLPVG<br>TMPEGTI<br>VCCLEE<br>KPGDR | 3.95 | 3,169.57 |
| Control | 6018 | RecName<br>:<br>Full=60S<br>ribosomal<br>protein<br>L8                                          | gi 1088609<br>41.gi 15442<br>6156.gi 742<br>67654.gi 77<br>736197               | 28,006.80  | 99.90%  | 2  | 3  | 3  | 0.03% | 17.90% | ASGNYA<br>TVISHNP<br>ETK                       | 4.2  | 1,688.82 |
| Control | 6018 | Family<br>with<br>sequence<br>similarity<br>62 (C2<br>domain<br>containin<br>g),<br>member<br>A | gi 1173061<br>90.gi 11815<br>0984                                               | 123,012.90 | 100.00% | 4  | 5  | 7  | 0.07% | 5.70%  | ALTIGA<br>LTLPLAR                              | 2.55 | 1,309.82 |
| Control | 6018 | Family<br>with<br>sequence<br>similarity<br>62 (C2<br>domain<br>containin<br>g),<br>member<br>A | gi 1173061<br>90.gi 11815<br>0984                                               | 123,012.90 | 100.00% | 4  | 5  | 7  | 0.07% | 5.70%  | GEGSGT<br>LGSLSLP<br>LSELLVA<br>DR             | 3.96 | 2,171.16 |

|         |      |                                                                      |                                        |            |         |   |   |   |       |        |                            |      |          |
|---------|------|----------------------------------------------------------------------|----------------------------------------|------------|---------|---|---|---|-------|--------|----------------------------|------|----------|
| Control | 6018 | Family with sequence similarity 62 (C2 domain containin g), member A | gi 117306190,gi 118150984              | 123,012.90 | 100.00% | 4 | 5 | 7 | 0.07% | 5.70%  | LHVLEA QDLIAK              | 3.18 | 1,349.78 |
| Control | 6018 | Family with sequence similarity 62 (C2 domain containin g), member A | gi 117306190,gi 118150984              | 123,012.90 | 100.00% | 4 | 5 | 7 | 0.07% | 5.70%  | LLVPLVP DLQDVA QLR         | 2.85 | 1,789.06 |
| Control | 6018 | GANAB protein                                                        | gi 151553519,gi 194679898              | 109,455.80 | 100.00% | 7 | 7 | 7 | 0.07% | 12.90% | LKVTEG GEPYR               | 3.03 | 1,248.66 |
| Control | 6018 | GANAB protein                                                        | gi 151553519,gi 194679898              | 109,455.80 | 100.00% | 7 | 7 | 7 | 0.07% | 12.90% | LSFQHD PETSVLI LR          | 3.42 | 1,754.94 |
| Control | 6018 | GANAB protein                                                        | gi 151553519,gi 194679898              | 109,455.80 | 100.00% | 7 | 7 | 7 | 0.07% | 12.90% | MLDYLQ GSGETP QTDVR        | 5.03 | 1,925.89 |
| Control | 6018 | GANAB protein                                                        | gi 151553519,gi 194679898              | 109,455.80 | 100.00% | 7 | 7 | 7 | 0.07% | 12.90% | QYASLT GTQALP PLFSLGY HQSR | 3.47 | 2,535.30 |
| Control | 6018 | GANAB protein                                                        | gi 151553519,gi 194679898              | 109,455.80 | 100.00% | 7 | 7 | 7 | 0.07% | 12.90% | VVIIGAG KPATVV LQTK        | 3.95 | 1,694.06 |
| Control | 6018 | GANAB protein                                                        | gi 151553519,gi 194679898              | 109,455.80 | 100.00% | 7 | 7 | 7 | 0.07% | 12.90% | YHGPQT LYLPVT LSSIPVF QR   | 3.69 | 2,416.30 |
| Control | 6018 | GANAB protein                                                        | gi 151553519,gi 194679898              | 109,455.80 | 100.00% | 7 | 7 | 7 | 0.07% | 12.90% | YRVPDV LVADPP TAGLSV SGR   | 3.4  | 2,169.17 |
| Control | 6018 | Myosin ID                                                            | gi 109659303,gi 115497786,gi 122145769 | 115,924.40 | 100.00% | 3 | 3 | 3 | 0.03% | 4.37%  | DVIDKQ HTEQEA SYGR         | 3.55 | 1,875.88 |
| Control | 6018 | Myosin ID                                                            | gi 109659303,gi 115497786,gi 122145769 | 115,924.40 | 100.00% | 3 | 3 | 3 | 0.03% | 4.37%  | LNQPQP DFTK                | 2.61 | 1,187.61 |
| Control | 6018 | Myosin ID                                                            | gi 109659303,gi 115497786,gi 122145769 | 115,924.40 | 100.00% | 3 | 3 | 3 | 0.03% | 4.37%  | SFHSFYQ LLQGGS DQMLR       | 4.74 | 2,130.01 |
| Control | 6018 | Chromosome 20 open reading frame 3 ortholog                          | gi 74268319,gi 78369434                | 46,074.40  | 100.00% | 3 | 4 | 5 | 0.05% | 10.70% | EPPLFLG VLQPNT K           | 2.44 | 1,552.87 |
| Control | 6018 | Chromosome 20 open reading frame 3 ortholog                          | gi 74268319,gi 78369434                | 46,074.40  | 100.00% | 3 | 4 | 5 | 0.05% | 10.70% | GGADV F VENLPG FPDNIR      | 2.86 | 1,916.95 |



|         |      |                                                                                                                                                                                          |                         |            |         |   |   |   |       |        |                         |      |          |
|---------|------|------------------------------------------------------------------------------------------------------------------------------------------------------------------------------------------|-------------------------|------------|---------|---|---|---|-------|--------|-------------------------|------|----------|
| Control | 6018 | Chromosome 20 open reading frame 3 ortholog                                                                                                                                              | gi 74268319,gi 78369434 | 46,074.40  | 100.00% | 3 | 4 | 5 | 0.05% | 10.70% | LLLSSET<br>PIEGR        | 3.05 | 1,314.73 |
| Control | 6018 | PREDICTED: similar to Alpha-mannosidase 2 (Alpha-mannosidase II) (Mannosyl-oligosaccharide 1,3-1,6-alpha-mannosidase) (MAN II) (Golgi alpha-mannosidase II) (Mannosidase alpha class 2A) | gi 119896006            | 130,855.40 | 100.00% | 4 | 4 | 4 | 0.04% | 4.72%  | FYTDLN<br>GYQIQP<br>R   | 2.3  | 1,614.79 |
| Control | 6018 | PREDICTED: similar to Alpha-mannosidase 2 (Alpha-mannosidase II) (Mannosyl-oligosaccharide 1,3-1,6-alpha-mannosidase) (MAN II) (Golgi alpha-mannosidase II) (Mannosidase alpha class 2A) | gi 119896006            | 130,855.40 | 100.00% | 4 | 4 | 4 | 0.04% | 4.72%  | IQFGTLS<br>DYFDAL<br>EK | 3.53 | 1,746.86 |

|         |      |                                                                                                                                                                                                                        |                           |            |         |   |   |   |       |        |                                        |      |          |
|---------|------|------------------------------------------------------------------------------------------------------------------------------------------------------------------------------------------------------------------------|---------------------------|------------|---------|---|---|---|-------|--------|----------------------------------------|------|----------|
| Control | 6018 | PREDIC TED: 06<br>similar to<br>Alpha-mannosidase 2<br>(Alpha-mannosidase II)<br>(Mannosyl-oligosaccharide<br>1,3-1,6-alpha-mannosidase)<br>(MAN II)<br>(Golgi alpha-mannosidase II)<br>(Mannosidase<br>alpha class 2A | gi 1198960                | 130,855.40 | 100.00% | 4 | 4 | 4 | 0.04% | 4.72%  | LLAENN<br>EISNIR                       | 4.08 | 1,498.82 |
| Control | 6018 | PREDIC TED: 06<br>similar to<br>Alpha-mannosidase 2<br>(Alpha-mannosidase II)<br>(Mannosyl-oligosaccharide<br>1,3-1,6-alpha-mannosidase)<br>(MAN II)<br>(Golgi alpha-mannosidase II)<br>(Mannosidase<br>alpha class 2A | gi 1198960                | 130,855.40 | 100.00% | 4 | 4 | 4 | 0.04% | 4.72%  | TTVVLA<br>PLGDDF<br>R                  | 3.18 | 1,403.75 |
| Control | 6018 | RecName :<br>Full=Mitochondrial fission factor                                                                                                                                                                         | gi 1221409<br>19,gi 14874 | 29,683.40  | 99.80%  | 2 | 2 | 2 | 0.02% | 14.80% | RLQLLE<br>EENKER                       | 4.01 | 1,556.84 |
| Control | 6018 | RecName :<br>Full=Mitochondrial fission factor                                                                                                                                                                         | gi 1221409<br>19,gi 14874 | 29,683.40  | 99.80%  | 2 | 2 | 2 | 0.02% | 14.80% | VLTLSE<br>PLDFLDL<br>ERPAPTP<br>QNEEIR | 3.43 | 3,148.66 |

|         |      |                                                                                                                                                                                                                                                                                                                                                                                                                                        |           |         |   |   |    |       |        |                      |          |
|---------|------|----------------------------------------------------------------------------------------------------------------------------------------------------------------------------------------------------------------------------------------------------------------------------------------------------------------------------------------------------------------------------------------------------------------------------------------|-----------|---------|---|---|----|-------|--------|----------------------|----------|
| Control | 6018 | RecName gi 117085.g<br>: i 14924153<br>Full=Cyt 9,gi 149241<br>ochrome 552,gi 1492<br>c oxidase 41569,gi 14<br>subunit 4 9241582,gi <br>isoform 149241599,<br>1, gi 1492416<br>mitochon 12,gi 47824<br>drial; 862,gi 5063<br>AltName: 89,gi 59858<br>Full=Cyt 423,gi 7435<br>ochrome 4123<br>c oxidase<br>subunit<br>IV<br>isoform<br>1;<br>Short=C<br>OX IV-1;<br>AltName:<br>Full=Cyt<br>ochrome<br>c oxidase<br>polypepti<br>de IV; | 19,554.00 | 100.00% | 4 | 5 | 13 | 0.13% | 20.10% | DYPLPD 2.57<br>VAHVK | 1,253.65 |
| Control | 6018 | RecName gi 117085.g<br>: i 14924153<br>Full=Cyt 9,gi 149241<br>ochrome 552,gi 1492<br>c oxidase 41569,gi 14<br>subunit 4 9241582,gi <br>isoform 149241599,<br>1, gi 1492416<br>mitochon 12,gi 47824<br>drial; 862,gi 5063<br>AltName: 89,gi 59858<br>Full=Cyt 423,gi 7435<br>ochrome 4123<br>c oxidase<br>subunit<br>IV<br>isoform<br>1;<br>Short=C<br>OX IV-1;<br>AltName:<br>Full=Cyt<br>ochrome<br>c oxidase<br>polypepti<br>de IV; | 19,554.00 | 100.00% | 4 | 5 | 13 | 0.13% | 20.10% | FKESFAE 3.8<br>MNR   | 1,274.58 |

|         |      |                                                                                                                                                                                                                                                                                      |                                                                                                                                                                                       |           |         |   |   |    |       |        |                                      |          |
|---------|------|--------------------------------------------------------------------------------------------------------------------------------------------------------------------------------------------------------------------------------------------------------------------------------------|---------------------------------------------------------------------------------------------------------------------------------------------------------------------------------------|-----------|---------|---|---|----|-------|--------|--------------------------------------|----------|
| Control | 6018 | RecName<br>:<br>Full=Cyt<br>ochrome<br>c oxidase<br>subunit 4<br>isoform<br>1,<br>mitochon<br>drial;<br>AltName:<br>Full=Cyt<br>ochrome<br>c oxidase<br>subunit<br>IV<br>isoform<br>1;<br>Short=C<br>OX IV-1;<br>AltName:<br>Full=Cyt<br>ochrome<br>c oxidase<br>polypepti<br>de IV; | gij117085.g<br>ij14924153<br>9,gij149241<br>552,gij1492<br>41569,gij14<br>9241582,gij<br>149241599,<br>gij1492416<br>12,gij47824<br>862,gij5063<br>89,gij59858<br>423,gij7435<br>4123 | 19,554.00 | 100.00% | 4 | 5 | 13 | 0.13% | 20.10% | SEDYAL 2.94<br>PSYVDR                | 1,414.65 |
| Control | 6018 | RecName<br>:<br>Full=Cyt<br>ochrome<br>c oxidase<br>subunit 4<br>isoform<br>1,<br>mitochon<br>drial;<br>AltName:<br>Full=Cyt<br>ochrome<br>c oxidase<br>polypepti<br>de IV;                                                                                                          | gij117085.g<br>ij14924153<br>9,gij149241<br>552,gij1492<br>41569,gij14<br>9241582,gij<br>149241599,<br>gij1492416<br>12,gij47824<br>862,gij5063<br>89,gij59858<br>423,gij7435<br>4123 | 19,554.00 | 100.00% | 4 | 5 | 13 | 0.13% | 20.10% | SEDYAL 1.78<br>PSYVDR<br>R           | 1,570.75 |
| Control | 6018 | Canx<br>protein                                                                                                                                                                                                                                                                      | gij1572791<br>43,gij15778<br>5567                                                                                                                                                     | 67,759.10 | 100.00% | 6 | 9 | 21 | 0.21% | 12.30% | APVPTG 4.19<br>EVYFAD<br>SFDR        | 1,770.83 |
| Control | 6018 | Canx<br>protein                                                                                                                                                                                                                                                                      | gij1572791<br>43,gij15778<br>5567                                                                                                                                                     | 67,759.10 | 100.00% | 6 | 9 | 21 | 0.21% | 12.30% | IPNPDDF 3.21<br>EDLEPFK              | 1,707.83 |
| Control | 6018 | Canx<br>protein                                                                                                                                                                                                                                                                      | gij1572791<br>43,gij15778<br>5567                                                                                                                                                     | 67,759.10 | 100.00% | 6 | 9 | 21 | 0.21% | 12.30% | KIPNPDF 5.2<br>FEDLEPF<br>K          | 1,835.92 |
| Control | 6018 | Canx<br>protein                                                                                                                                                                                                                                                                      | gij1572791<br>43,gij15778<br>5567                                                                                                                                                     | 67,759.10 | 100.00% | 6 | 9 | 21 | 0.21% | 12.30% | TDAPQP 2.88<br>DVKEDE<br>EEKEEE<br>K | 2,245.00 |
| Control | 6018 | Canx<br>protein                                                                                                                                                                                                                                                                      | gij1572791<br>43,gij15778<br>5567                                                                                                                                                     | 67,759.10 | 100.00% | 6 | 9 | 21 | 0.21% | 12.30% | TPELNL 3.96<br>DQFHDK                | 1,456.71 |

|         |      |                                                  |                                        |            |         |    |    |    |       |        |                                       |      |          |
|---------|------|--------------------------------------------------|----------------------------------------|------------|---------|----|----|----|-------|--------|---------------------------------------|------|----------|
| Control | 6018 | Canx protein                                     | gi 157279143,gi 157785567              | 67,759.10  | 100.00% | 6  | 9  | 21 | 0.21% | 12.30% | TPELNL<br>DQFHDK<br>TPYTIMF<br>GPDK   | 5.2  | 2,723.30 |
| Control | 6018 | Nucleobindin 1                                   | gi 112362164,gi 115497814,gi 122142168 | 54,964.80  | 100.00% | 9  | 11 | 18 | 0.18% | 29.10% | AKMDA<br>QQEPNIQ<br>LDHLNL<br>LK      | 4.1  | 2,335.21 |
| Control | 6018 | Nucleobindin 1                                   | gi 112362164,gi 115497814,gi 122142168 | 54,964.80  | 100.00% | 9  | 11 | 18 | 0.18% | 29.10% | DLELLIQ<br>TATR                       | 2.81 | 1,272.72 |
| Control | 6018 | Nucleobindin 1                                   | gi 112362164,gi 115497814,gi 122142168 | 54,964.80  | 100.00% | 9  | 11 | 18 | 0.18% | 29.10% | ELQQAV<br>LQMEQR                      | 3.95 | 1,488.75 |
| Control | 6018 | Nucleobindin 1                                   | gi 112362164,gi 115497814,gi 122142168 | 54,964.80  | 100.00% | 9  | 11 | 18 | 0.18% | 29.10% | KQQQQS<br>HNNPAP<br>GPEGQL<br>K       | 4.34 | 2,086.04 |
| Control | 6018 | Nucleobindin 1                                   | gi 112362164,gi 115497814,gi 122142168 | 54,964.80  | 100.00% | 9  | 11 | 18 | 0.18% | 29.10% | LVTLEEF<br>LASTQR                     | 3.22 | 1,506.82 |
| Control | 6018 | Nucleobindin 1                                   | gi 112362164,gi 115497814,gi 122142168 | 54,964.80  | 100.00% | 9  | 11 | 18 | 0.18% | 29.10% | TFFILHDI<br>NSDGLV<br>DEQELE<br>ALFTK | 3.72 | 2,894.45 |
| Control | 6018 | Nucleobindin 1                                   | gi 112362164,gi 115497814,gi 122142168 | 54,964.80  | 100.00% | 9  | 11 | 18 | 0.18% | 29.10% | VNVPGS<br>QAQLK                       | 2.92 | 1,140.64 |
| Control | 6018 | Nucleobindin 1                                   | gi 112362164,gi 115497814,gi 122142168 | 54,964.80  | 100.00% | 9  | 11 | 18 | 0.18% | 29.10% | YLESLG<br>EEQRK                       | 3.13 | 1,351.69 |
| Control | 6018 | Nucleobindin 1                                   | gi 112362164,gi 115497814,gi 122142168 | 54,964.80  | 100.00% | 9  | 11 | 18 | 0.18% | 29.10% | YLQEVI<br>NVLETD<br>GHFR              | 2.9  | 1,932.98 |
| Control | 6018 | nicalin                                          | gi 115494944,gi 94534903               | 63,091.10  | 100.00% | 3  | 3  | 4  | 0.04% | 8.72%  | AAQLVD<br>KDGTFI<br>STLEHY<br>LSR     | 5.73 | 2,364.22 |
| Control | 6018 | nicalin                                          | gi 115494944,gi 94534903               | 63,091.10  | 100.00% | 3  | 3  | 4  | 0.04% | 8.72%  | ELETVA<br>AHQFPE<br>VR                | 3.6  | 1,625.83 |
| Control | 6018 | nicalin                                          | gi 115494944,gi 94534903               | 63,091.10  | 100.00% | 3  | 3  | 4  | 0.04% | 8.72%  | MQQYDL<br>QGQPYG<br>TR                | 3.81 | 1,700.77 |
| Control | 6018 | embryo-specific fibronectin 1 transcript variant | gi 220028657,gi 76610126               | 262,401.30 | 100.00% | 22 | 28 | 39 | 0.38% | 17.50% | DLQFVE<br>VTDVK                       | 3.33 | 1,292.67 |
| Control | 6018 | embryo-specific fibronectin 1 transcript variant | gi 220028657,gi 76610126               | 262,401.30 | 100.00% | 22 | 28 | 39 | 0.38% | 17.50% | EINLAPD<br>SSSVVV<br>SGLMVA<br>TK     | 4.3  | 2,133.11 |
| Control | 6018 | embryo-specific fibronectin 1 transcript variant | gi 220028657,gi 76610126               | 262,401.30 | 100.00% | 22 | 28 | 39 | 0.38% | 17.50% | GATYNII<br>VEAVK                      | 2.97 | 1,277.71 |

|         |      |                                                  |                          |            |         |    |    |    |       |        |                                                 |      |          |
|---------|------|--------------------------------------------------|--------------------------|------------|---------|----|----|----|-------|--------|-------------------------------------------------|------|----------|
| Control | 6018 | embryo-specific fibronectin 1 transcript variant | gi 220028657.gi 76610126 | 262,401.30 | 100.00% | 22 | 28 | 39 | 0.38% | 17.50% | GDSPAS<br>SKPVSIN<br>YR                         | 4.02 | 1,577.79 |
| Control | 6018 | embryo-specific fibronectin 1 transcript variant | gi 220028657.gi 76610126 | 262,401.30 | 100.00% | 22 | 28 | 39 | 0.38% | 17.50% | GFNCES<br>KPEPEET<br>CFDKYT<br>GNTYR            | 2.83 | 2,815.20 |
| Control | 6018 | embryo-specific fibronectin 1 transcript variant | gi 220028657.gi 76610126 | 262,401.30 | 100.00% | 22 | 28 | 39 | 0.38% | 17.50% | KKTDEL<br>PQLVTLP<br>HPNLHG<br>PEILDVP<br>STVQK | 3.37 | 3,443.89 |
| Control | 6018 | embryo-specific fibronectin 1 transcript variant | gi 220028657.gi 76610126 | 262,401.30 | 100.00% | 22 | 28 | 39 | 0.38% | 17.50% | NLQPGS<br>EYAVSL<br>VAVK                        | 4.14 | 1,674.91 |
| Control | 6018 | embryo-specific fibronectin 1 transcript variant | gi 220028657.gi 76610126 | 262,401.30 | 100.00% | 22 | 28 | 39 | 0.38% | 17.50% | NSITLTN<br>LNPGTE<br>YVVSIV<br>ALNSK            | 4.37 | 2,547.37 |
| Control | 6018 | embryo-specific fibronectin 1 transcript variant | gi 220028657.gi 76610126 | 262,401.30 | 100.00% | 22 | 28 | 39 | 0.38% | 17.50% | NTFAEV<br>TGLSPG<br>VTYHFK                      | 3.44 | 1,967.99 |
| Control | 6018 | embryo-specific fibronectin 1 transcript variant | gi 220028657.gi 76610126 | 262,401.30 | 100.00% | 22 | 28 | 39 | 0.38% | 17.50% | QYNVGP<br>AASQYP<br>LR                          | 3.8  | 1,563.79 |
| Control | 6018 | embryo-specific fibronectin 1 transcript variant | gi 220028657.gi 76610126 | 262,401.30 | 100.00% | 22 | 28 | 39 | 0.38% | 17.50% | RPGAEP<br>GNEGST<br>AHSYNQ<br>YSQR              | 5.74 | 2,406.08 |
| Control | 6018 | embryo-specific fibronectin 1 transcript variant | gi 220028657.gi 76610126 | 262,401.30 | 100.00% | 22 | 28 | 39 | 0.38% | 17.50% | SSPVVID<br>ASTAIDA<br>PSNLR                     | 5.25 | 1,913.00 |
| Control | 6018 | embryo-specific fibronectin 1 transcript variant | gi 220028657.gi 76610126 | 262,401.30 | 100.00% | 22 | 28 | 39 | 0.38% | 17.50% | STTPDIT<br>GYR                                  | 2.41 | 1,110.54 |
| Control | 6018 | embryo-specific fibronectin 1 transcript variant | gi 220028657.gi 76610126 | 262,401.30 | 100.00% | 22 | 28 | 39 | 0.38% | 17.50% | SYTITGL<br>QPGTDY<br>K                          | 4.23 | 1,543.76 |

|         |      |                                                  |                                       |            |         |    |    |    |       |        |                                                                  |      |          |
|---------|------|--------------------------------------------------|---------------------------------------|------------|---------|----|----|----|-------|--------|------------------------------------------------------------------|------|----------|
| Control | 6018 | embryo-specific fibronectin 1 transcript variant | gi 220028657,gi 76610126              | 262,401.30 | 100.00% | 22 | 28 | 39 | 0.38% | 17.50% | TEIDKPS<br>QMQVT<br>DVQDNS<br>ISVR                               | 4.6  | 2,506.21 |
| Control | 6018 | embryo-specific fibronectin 1 transcript variant | gi 220028657,gi 76610126              | 262,401.30 | 100.00% | 22 | 28 | 39 | 0.38% | 17.50% | TETITGF<br>QVDAIP<br>ANGQTPI<br>QR                               | 3.32 | 2,357.21 |
| Control | 6018 | embryo-specific fibronectin 1 transcript variant | gi 220028657,gi 76610126              | 262,401.30 | 100.00% | 22 | 28 | 39 | 0.38% | 17.50% | TKTETIT<br>GFQVDA<br>IPANGQT<br>PIQR                             | 3.58 | 2,586.35 |
| Control | 6018 | embryo-specific fibronectin 1 transcript variant | gi 220028657,gi 76610126              | 262,401.30 | 100.00% | 22 | 28 | 39 | 0.38% | 17.50% | TPFITNP<br>GYDTGN<br>GIQLPGT<br>SGQQPS<br>LGQQMI<br>FEEHGF<br>RR | 3.48 | 4,392.11 |
| Control | 6018 | embryo-specific fibronectin 1 transcript variant | gi 220028657,gi 76610126              | 262,401.30 | 100.00% | 22 | 28 | 39 | 0.38% | 17.50% | VDVIPV<br>NLPGEH<br>GQR                                          | 2.4  | 1,629.87 |
| Control | 6018 | embryo-specific fibronectin 1 transcript variant | gi 220028657,gi 76610126              | 262,401.30 | 100.00% | 22 | 28 | 39 | 0.38% | 17.50% | VEYELS<br>EEGDEP<br>QYLDLP<br>STATSV<br>NIPDLLP<br>GRK           | 4.14 | 3,774.86 |
| Control | 6018 | embryo-specific fibronectin 1 transcript variant | gi 220028657,gi 76610126              | 262,401.30 | 100.00% | 22 | 28 | 39 | 0.38% | 17.50% | VPGTA<br>SATLTG<br>LTR                                           | 4.33 | 1,431.78 |
| Control | 6018 | embryo-specific fibronectin 1 transcript variant | gi 220028657,gi 76610126              | 262,401.30 | 100.00% | 22 | 28 | 39 | 0.38% | 17.50% | VTWAPP<br>SSIELTN<br>LLVR                                        | 2.33 | 1,896.06 |
| Control | 6018 | translocation of outer mitochondrial membrane 40 | gi 115495635,gi 122134275,gi 94534905 | 37,707.00  | 100.00% | 4  | 5  | 9  | 0.09% | 22.70% | KLPPLPL<br>TLALGA<br>FLNHR                                       | 2.22 | 1,971.19 |
| Control | 6018 | translocation of outer mitochondrial membrane 40 | gi 115495635,gi 122134275,gi 94534905 | 37,707.00  | 100.00% | 4  | 5  | 9  | 0.09% | 22.70% | MQDTSV<br>SFGYQL<br>DLPK                                         | 4.32 | 1,844.87 |
| Control | 6018 | translocation of outer mitochondrial membrane 40 | gi 115495635,gi 122134275,gi 94534905 | 37,707.00  | 100.00% | 4  | 5  | 9  | 0.09% | 22.70% | QLSPTEA<br>FPVLVG<br>DMDNSG<br>SLNAQVI<br>HQLGPG<br>LR           | 3.76 | 3,576.81 |

|         |      |                                                                   |                                       |            |         |   |   |   |       |        |                                        |      |          |
|---------|------|-------------------------------------------------------------------|---------------------------------------|------------|---------|---|---|---|-------|--------|----------------------------------------|------|----------|
| Control | 6018 | translocase of outer mitochondrial membrane 40                    | gi 115495635,gi 122134275,gi 94534905 | 37,707.00  | 100.00% | 4 | 5 | 9 | 0.09% | 22.70% | RPGEEG<br>AVMSLA<br>GK                 | 4.14 | 1,417.71 |
| Control | 6018 | PREDICTED: ATPase, Ca++ transporting, plasma membrane 4 isoform 5 | gi 119908026                          | 133,777.70 | 100.00% | 6 | 6 | 6 | 0.06% | 8.29%  | ADVGFA<br>MGIAGT<br>DVAK               | 4.36 | 1,538.75 |
| Control | 6018 | PREDICTED: ATPase, Ca++ transporting, plasma membrane 4 isoform 5 | gi 119908026                          | 133,777.70 | 100.00% | 6 | 6 | 6 | 0.06% | 8.29%  | EASDIL<br>TDDNFT<br>SIVK               | 4    | 1,880.95 |
| Control | 6018 | PREDICTED: ATPase, Ca++ transporting, plasma membrane 4 isoform 5 | gi 119908026                          | 133,777.70 | 100.00% | 6 | 6 | 6 | 0.06% | 8.29%  | GIDSTV<br>GDQR                         | 3.31 | 1,160.59 |
| Control | 6018 | PREDICTED: ATPase, Ca++ transporting, plasma membrane 4 isoform 5 | gi 119908026                          | 133,777.70 | 100.00% | 6 | 6 | 6 | 0.06% | 8.29%  | TNPVEG<br>LSGNPA<br>DLEK               | 4.26 | 1,640.81 |
| Control | 6018 | PREDICTED: ATPase, Ca++ transporting, plasma membrane 4 isoform 5 | gi 119908026                          | 133,777.70 | 100.00% | 6 | 6 | 6 | 0.06% | 8.29%  | TPLLDE<br>QEEEIFE<br>K                 | 4.6  | 1,719.83 |
| Control | 6018 | PREDICTED: ATPase, Ca++ transporting, plasma membrane 4 isoform 5 | gi 119908026                          | 133,777.70 | 100.00% | 6 | 6 | 6 | 0.06% | 8.29%  | TQDGVA<br>LEIQPLN<br>SQEGIDS<br>EEKEKK | 3.84 | 2,885.44 |



|         |      |                                                |                                                                                                                         |           |         |   |   |    |       |        |                                                |      |          |
|---------|------|------------------------------------------------|-------------------------------------------------------------------------------------------------------------------------|-----------|---------|---|---|----|-------|--------|------------------------------------------------|------|----------|
| Control | 6018 | PREDIC TED: similar to histone cluster 1, H2aj | gi 1199155<br>59,gi 11991<br>5725,gi 119<br>939855,gi 1<br>98282091,g<br>i 76619954,<br>gi 7663126<br>9,gi 766335<br>42 | 14,074.00 | 100.00% | 5 | 8 | 27 | 0.26% | 57.70% | AGLQFP<br>VGR                                  | 3.56 | 944.5313 |
| Control | 6018 | PREDIC TED: similar to histone cluster 1, H2aj | gi 1199155<br>59,gi 11991<br>5725,gi 119<br>939855,gi 1<br>98282091,g<br>i 76619954,<br>gi 7663126<br>9,gi 766335<br>42 | 14,074.00 | 100.00% | 5 | 8 | 27 | 0.26% | 57.70% | HLQLAIR                                        | 2.63 | 850.5258 |
| Control | 6018 | PREDIC TED: similar to histone cluster 1, H2aj | gi 1199155<br>59,gi 11991<br>5725,gi 119<br>939855,gi 1<br>98282091,g<br>i 76619954,<br>gi 7663126<br>9,gi 766335<br>42 | 14,074.00 | 100.00% | 5 | 8 | 27 | 0.26% | 57.70% | NDEELN<br>KLLGK                                | 3.68 | 1,272.68 |
| Control | 6018 | PREDIC TED: similar to histone cluster 1, H2aj | gi 1199155<br>59,gi 11991<br>5725,gi 119<br>939855,gi 1<br>98282091,g<br>i 76619954,<br>gi 7663126<br>9,gi 766335<br>42 | 14,074.00 | 100.00% | 5 | 8 | 27 | 0.26% | 57.70% | VGAGAP<br>VYLA AV<br>LEYLTA<br>EILELAG<br>NAAR | 6.19 | 2,915.59 |
| Control | 6018 | PREDIC TED: similar to histone cluster 1, H2aj | gi 1199155<br>59,gi 11991<br>5725,gi 119<br>939855,gi 1<br>98282091,g<br>i 76619954,<br>gi 7663126<br>9,gi 766335<br>42 | 14,074.00 | 100.00% | 5 | 8 | 27 | 0.26% | 57.70% | VTIAQG<br>GVLPNIQ<br>AVLLPK                    | 5.48 | 1,931.17 |
| Control | 6018 | RecName : Full=Nuc leophosm in; Short=N PM     | gi 1162485<br>56,gi 74353<br>960,gi 7836<br>9456                                                                        | 32,685.20 | 99.80%  | 2 | 3 | 3  | 0.03% | 11.60% | MSVQPT<br>VSLGGF<br>EITPPVV<br>LR              | 4.41 | 2,243.21 |
| Control | 6018 | RecName : Full=Nuc leophosm in; Short=N PM     | gi 1162485<br>56,gi 74353<br>960,gi 7836<br>9456                                                                        | 32,685.20 | 99.80%  | 2 | 3 | 3  | 0.03% | 11.60% | VDNDEN<br>EHQLSL<br>R                          | 4.16 | 1,568.73 |
| Control | 6018 | Plexin domain containin g 2                    | gi 1173066<br>39,gi 11815<br>0958                                                                                       | 59,450.20 | 100.00% | 3 | 3 | 4  | 0.04% | 8.47%  | EIPVLVT<br>QISSTNH<br>PVK                      | 4.34 | 1,862.04 |
| Control | 6018 | Plexin domain containin g 2                    | gi 1173066<br>39,gi 11815<br>0958                                                                                       | 59,450.20 | 100.00% | 3 | 3 | 4  | 0.04% | 8.47%  | GSGHPA<br>YAEVEP<br>VGEK                       | 4.01 | 1,626.78 |

|         |      |                                                                                                                                                                                                                   |                                                   |           |         |    |    |    |       |        |                                                      |          |
|---------|------|-------------------------------------------------------------------------------------------------------------------------------------------------------------------------------------------------------------------|---------------------------------------------------|-----------|---------|----|----|----|-------|--------|------------------------------------------------------|----------|
| Control | 6018 | Plexin domain containin g 2                                                                                                                                                                                       | gi 117306639,gi 118150958                         | 59,450.20 | 100.00% | 3  | 3  | 4  | 0.04% | 8.47%  | VGLSDA 4.71<br>FVVVHR                                | 1,298.72 |
| Control | 6018 | RecName : Full=OCI A domain- containin g protein 2                                                                                                                                                                | gi 122140146,gi 74353966,gi 77735471              | 16,827.50 | 99.80%  | 2  | 2  | 2  | 0.02% | 14.30% | FHSFEG 2.34<br>QLR                                   | 1,120.55 |
| Control | 6018 | RecName : Full=OCI A domain- containin g protein 2                                                                                                                                                                | gi 122140146,gi 74353966,gi 77735471              | 16,827.50 | 99.80%  | 2  | 2  | 2  | 0.02% | 14.30% | VALAGIL 4.18<br>GFGLGK                               | 1,215.75 |
| Control | 6018 | PREDIC TED: low density lipoprotein receptor (familial hypercholesterolemia) isoform 2                                                                                                                            | gi 7662180                                        | 92,850.80 | 99.80%  | 2  | 2  | 3  | 0.03% | 3.20%  | NVVALD 3.69<br>TEVASN<br>R                           | 1,387.72 |
| Control | 6018 | PREDIC TED: low density lipoprotein receptor (familial hypercholesterolemia) isoform 2                                                                                                                            | gi 7662180                                        | 92,850.80 | 99.80%  | 2  | 2  | 3  | 0.03% | 3.20%  | SINSINF 4.22<br>DNPVYQ<br>K                          | 1,638.81 |
| Control | 6018 | RecName : Full=Doli chyl-diphosphooligosaccharide--protein glycosyltransferase subunit 2; AltName: Full=Doli chyl-diphosphooligosaccharide--protein glycosyltransferase 63 kDa subunit; AltName: Full=Ribophorin- | gi 122140231,gi 146231756,gi 74267729,gi 77736155 | 69,197.20 | 100.00% | 12 | 18 | 27 | 0.26% | 35.80% | ASLDRPF 4.54<br>TSLESFA<br>YSIVGLS<br>SLGAQV<br>PDVK | 3,254.69 |

|         |      |                                                                                                                                                                                                                                                                                                                 |           |         |    |    |    |       |        |                                                                    |      |          |
|---------|------|-----------------------------------------------------------------------------------------------------------------------------------------------------------------------------------------------------------------------------------------------------------------------------------------------------------------|-----------|---------|----|----|----|-------|--------|--------------------------------------------------------------------|------|----------|
| Control | 6018 | RecName gi 1221402 :<br>Full=Doli<br>chyl-<br>diphosph<br>ooligosac<br>charide--<br>protein<br>glycosyltr<br>ansferase<br>subunit<br>2;<br>AltName:<br>Full=Doli<br>chyl-<br>diphosph<br>ooligosac<br>charide--<br>protein<br>glycosyltr<br>ansferase<br>63 kDa<br>subunit;<br>AltName:<br>Full=Rib<br>ophorin- | 69,197.20 | 100.00% | 12 | 18 | 27 | 0.26% | 35.80% | ASLDRPF<br>TSLESFA<br>YSIVGLS<br>SLGAQV<br>PDVKK                   | 4.97 | 3,382.79 |
| Control | 6018 | RecName gi 1221402 :<br>Full=Doli<br>chyl-<br>diphosph<br>ooligosac<br>charide--<br>protein<br>glycosyltr<br>ansferase<br>subunit<br>2;<br>AltName:<br>Full=Doli<br>chyl-<br>diphosph<br>ooligosac<br>charide--<br>protein<br>glycosyltr<br>ansferase<br>63 kDa<br>subunit;<br>AltName:<br>Full=Rib<br>ophorin- | 69,197.20 | 100.00% | 12 | 18 | 27 | 0.26% | 35.80% | DLLLAA<br>VSEDSS<br>VAQIYH<br>AVAALS<br>GFGLPL<br>ASQEAL<br>GALTAR | 3.87 | 4,196.22 |

|         |      |                                                                                                                                                                                                                                                                                                                 |           |         |    |    |    |       |        |                                      |      |          |
|---------|------|-----------------------------------------------------------------------------------------------------------------------------------------------------------------------------------------------------------------------------------------------------------------------------------------------------------------|-----------|---------|----|----|----|-------|--------|--------------------------------------|------|----------|
| Control | 6018 | RecName gi 1221402 :<br>Full=Doli<br>chyl-<br>diphosph<br>ooligosac<br>charide--<br>protein<br>glycosyltr<br>ansferase<br>subunit<br>2;<br>AltName:<br>Full=Doli<br>chyl-<br>diphosph<br>ooligosac<br>charide--<br>protein<br>glycosyltr<br>ansferase<br>63 kDa<br>subunit;<br>AltName:<br>Full=Rib<br>ophorin- | 69,197.20 | 100.00% | 12 | 18 | 27 | 0.26% | 35.80% | ISTEVGI<br>TNVDLS<br>TVDKDQ<br>SIAPK | 4.98 | 2,530.33 |
| Control | 6018 | RecName gi 1221402 :<br>Full=Doli<br>chyl-<br>diphosph<br>ooligosac<br>charide--<br>protein<br>glycosyltr<br>ansferase<br>subunit<br>2;<br>AltName:<br>Full=Doli<br>chyl-<br>diphosph<br>ooligosac<br>charide--<br>protein<br>glycosyltr<br>ansferase<br>63 kDa<br>subunit;<br>AltName:<br>Full=Rib<br>ophorin- | 69,197.20 | 100.00% | 12 | 18 | 27 | 0.26% | 35.80% | KNFESLS<br>EAFSVA<br>SAAAAL<br>SENR  | 3.64 | 2,399.18 |



|         |      |                                                                                                                                                                                                                                                                                                                    |           |         |    |    |    |       |        |                                             |      |          |
|---------|------|--------------------------------------------------------------------------------------------------------------------------------------------------------------------------------------------------------------------------------------------------------------------------------------------------------------------|-----------|---------|----|----|----|-------|--------|---------------------------------------------|------|----------|
| Control | 6018 | RecName gi 1221402<br>:<br>Full=Doli<br>chyl-<br>diphosph<br>ooligosac<br>charide--<br>protein<br>glycosyltr<br>ansferase<br>subunit<br>2;<br>AltName:<br>Full=Doli<br>chyl-<br>diphosph<br>ooligosac<br>charide--<br>protein<br>glycosyltr<br>ansferase<br>63 kDa<br>subunit;<br>AltName:<br>Full=Rib<br>ophorin- | 69,197.20 | 100.00% | 12 | 18 | 27 | 0.26% | 35.80% | LSKEET<br>VLATVQ<br>ALQTAS<br>YLSQQA<br>DLR | 5.25 | 2,963.57 |
| Control | 6018 | RecName gi 1221402<br>:<br>Full=Doli<br>chyl-<br>diphosph<br>ooligosac<br>charide--<br>protein<br>glycosyltr<br>ansferase<br>subunit<br>2;<br>AltName:<br>Full=Doli<br>chyl-<br>diphosph<br>ooligosac<br>charide--<br>protein<br>glycosyltr<br>ansferase<br>63 kDa<br>subunit;<br>AltName:<br>Full=Rib<br>ophorin- | 69,197.20 | 100.00% | 12 | 18 | 27 | 0.26% | 35.80% | NFESLSE<br>AFSVAS<br>AAAALS<br>ENR          | 4.48 | 2,271.09 |

|         |      |                                                                                                                                                                                                                                                                                                                 |           |         |    |    |    |       |        |                        |      |          |
|---------|------|-----------------------------------------------------------------------------------------------------------------------------------------------------------------------------------------------------------------------------------------------------------------------------------------------------------------|-----------|---------|----|----|----|-------|--------|------------------------|------|----------|
| Control | 6018 | RecName gi 1221402 :<br>Full=Doli<br>chyl-<br>diphosph<br>ooligosac<br>charide--<br>protein<br>glycosyltr<br>ansferase<br>subunit<br>2;<br>AltName:<br>Full=Doli<br>chyl-<br>diphosph<br>ooligosac<br>charide--<br>protein<br>glycosyltr<br>ansferase<br>63 kDa<br>subunit;<br>AltName:<br>Full=Rib<br>ophorin- | 69,197.20 | 100.00% | 12 | 18 | 27 | 0.26% | 35.80% | SIVEEIE<br>DLVAR       | 4.33 | 1,372.73 |
| Control | 6018 | RecName gi 1221402 :<br>Full=Doli<br>chyl-<br>diphosph<br>ooligosac<br>charide--<br>protein<br>glycosyltr<br>ansferase<br>subunit<br>2;<br>AltName:<br>Full=Doli<br>chyl-<br>diphosph<br>ooligosac<br>charide--<br>protein<br>glycosyltr<br>ansferase<br>63 kDa<br>subunit;<br>AltName:<br>Full=Rib<br>ophorin- | 69,197.20 | 100.00% | 12 | 18 | 27 | 0.26% | 35.80% | TGQEVV<br>FVAEPD<br>SK | 3.9  | 1,505.75 |

|         |      |                                                                                                                                                                                                                                                                                                         |                                                                   |           |         |    |    |    |       |        |                                                               |      |          |
|---------|------|---------------------------------------------------------------------------------------------------------------------------------------------------------------------------------------------------------------------------------------------------------------------------------------------------------|-------------------------------------------------------------------|-----------|---------|----|----|----|-------|--------|---------------------------------------------------------------|------|----------|
| Control | 6018 | RecName<br>:<br>Full=Doli<br>chyl-<br>diphosph<br>ooligosac<br>charide--<br>protein<br>glycosyltr<br>ansferase<br>subunit<br>2;<br>AltName:<br>Full=Doli<br>chyl-<br>diphosph<br>ooligosac<br>charide--<br>protein<br>glycosyltr<br>ansferase<br>63 kDa<br>subunit;<br>AltName:<br>Full=Rib<br>ophorin- | gi 1221402<br>31,gi 14623<br>1756,gi 742<br>67729,gi 77<br>736155 | 69,197.20 | 100.00% | 12 | 18 | 27 | 0.26% | 35.80% | YIANTV<br>ELR                                                 | 3.27 | 1,078.59 |
| Control | 6018 | RecName<br>:<br>Full=60S<br>acidic<br>ribosomal<br>protein<br>P2                                                                                                                                                                                                                                        | gi 1173072,<br>gi 2780752<br>3,gi 600177<br>,gi 8257175<br>5      | 11,684.40 | 100.00% | 2  | 2  | 2  | 0.02% | 46.10% | ILDSVGI<br>EADDDR<br>LNK                                      | 4.06 | 1,772.90 |
| Control | 6018 | RecName<br>:<br>Full=60S<br>acidic<br>ribosomal<br>protein<br>P2                                                                                                                                                                                                                                        | gi 1173072,<br>gi 2780752<br>3,gi 600177<br>,gi 8257175<br>5      | 11,684.40 | 100.00% | 2  | 2  | 2  | 0.02% | 46.10% | LASVPA<br>GGAVAV<br>SAAPGS<br>AAPAAG<br>SAPAAA<br>EEKKEE<br>K | 3.45 | 3,288.71 |
| Control | 6018 | PREDIC<br>TED:<br>similar to<br>Calcium-<br>binding<br>mitochon<br>drial<br>carrier<br>protein<br>Aralar2<br>(Mitocho<br>ndrial<br>aspartate<br>glutamate<br>carrier 2)<br>(Solute<br>carrier<br>family 25<br>member<br>13)<br>(Citrin)                                                                 | gi 1198907<br>34                                                  | 74,177.70 | 100.00% | 4  | 5  | 6  | 0.06% | 11.70% | GLLPQLL<br>GVAPEK                                             | 2.53 | 1,334.80 |



|         |      |                                                                                                                                                                                                                                           |                  |           |         |   |   |   |       |        |                            |      |          |
|---------|------|-------------------------------------------------------------------------------------------------------------------------------------------------------------------------------------------------------------------------------------------|------------------|-----------|---------|---|---|---|-------|--------|----------------------------|------|----------|
| Control | 6018 | PREDIC<br>TED:<br>similar to<br>Calcium-<br>binding<br>mitochon-<br>drial<br>carrier<br>protein<br>Aralar2<br>(Mitochon-<br>drial<br>aspartate<br>glutamate<br>carrier 2)<br>(Solute<br>carrier<br>family 25<br>member<br>13)<br>(Citrin) | gi 1198907<br>34 | 74,177.70 | 100.00% | 4 | 5 | 6 | 0.06% | 11.70% | IAPLEEG<br>TLPFNLA<br>EAQR | 4.25 | 1,969.04 |
| Control | 6018 | PREDIC<br>TED:<br>similar to<br>Calcium-<br>binding<br>mitochon-<br>drial<br>carrier<br>protein<br>Aralar2<br>(Mitochon-<br>drial<br>aspartate<br>glutamate<br>carrier 2)<br>(Solute<br>carrier<br>family 25<br>member<br>13)<br>(Citrin) | gi 1198907<br>34 | 74,177.70 | 100.00% | 4 | 5 | 6 | 0.06% | 11.70% | ITLPAPN<br>PDHVG<br>YK     | 2.11 | 1,578.83 |
| Control | 6018 | PREDIC<br>TED:<br>similar to<br>Calcium-<br>binding<br>mitochon-<br>drial<br>carrier<br>protein<br>Aralar2<br>(Mitochon-<br>drial<br>aspartate<br>glutamate<br>carrier 2)<br>(Solute<br>carrier<br>family 25<br>member<br>13)<br>(Citrin) | gi 1198907<br>34 | 74,177.70 | 100.00% | 4 | 5 | 6 | 0.06% | 11.70% | LAVATF<br>AGIENK           | 3.52 | 1,233.68 |

|         |      |                                                                                                                                                                            |                                        |           |         |   |   |   |       |        |                                                              |          |
|---------|------|----------------------------------------------------------------------------------------------------------------------------------------------------------------------------|----------------------------------------|-----------|---------|---|---|---|-------|--------|--------------------------------------------------------------|----------|
| Control | 6018 | PREDICTED:<br>similar to Calcium-binding mitochondrial carrier protein Aralar2 (Mitochondrial aspartate glutamate carrier 2) (Solute carrier family 25 member 13) (Citrin) | gi 119890734                           | 74,177.70 | 100.00% | 4 | 5 | 6 | 0.06% | 11.70% | LTVNDF 2<br>VR                                               | 963.5258 |
| Control | 6018 | PREDICTED:<br>similar to Calcium-binding mitochondrial carrier protein Aralar2 (Mitochondrial aspartate glutamate carrier 2) (Solute carrier family 25 member 13) (Citrin) | gi 119890734                           | 74,177.70 | 100.00% | 4 | 5 | 6 | 0.06% | 11.70% | YLNIFGE 3.82<br>SQPNPK                                       | 1,506.76 |
| Control | 6018 | STT3B protein                                                                                                                                                              | gi 146186621.gi 148235371              | 93,202.50 | 100.00% | 3 | 3 | 3 | 0.03% | 5.96%  | ENPPVE 2.31<br>DSSDED<br>DKRNPG<br>NLYDK                     | 2,633.16 |
| Control | 6018 | STT3B protein                                                                                                                                                              | gi 146186621.gi 148235371              | 93,202.50 | 100.00% | 3 | 3 | 3 | 0.03% | 5.96%  | FGEMQL 2.42<br>DFR                                           | 1,158.53 |
| Control | 6018 | STT3B protein                                                                                                                                                              | gi 146186621.gi 148235371              | 93,202.50 | 100.00% | 3 | 3 | 3 | 0.03% | 5.96%  | HVTEQE 3.17<br>KTEEGL<br>GPNIK                               | 1,908.97 |
| Control | 6018 | Synaptotagmin 2 binding protein                                                                                                                                            | gi 74354054.gi 78369420                | 15,792.00 | 99.80%  | 2 | 4 | 7 | 0.07% | 19.30% | LQEGDK 5.21<br>ILSVNGQ<br>DLK                                | 1,756.94 |
| Control | 6018 | Synaptotagmin 2 binding protein                                                                                                                                            | gi 74354054.gi 78369420                | 15,792.00 | 99.80%  | 2 | 4 | 7 | 0.07% | 19.30% | NLLHQD 3.5<br>AVDLFR                                         | 1,440.76 |
| Control | 6018 | ADPGK protein                                                                                                                                                              | gi 126010731.gi 126722892.gi 205686178 | 54,066.80 | 99.80%  | 2 | 2 | 2 | 0.02% | 9.66%  | FFSDKET 3.18<br>FHDIAQ<br>VASEFPE<br>AQHYVG<br>GNAALI<br>GQK | 3,851.87 |

|         |      |                                        |                                                |            |         |    |    |    |       |        |                                                      |          |
|---------|------|----------------------------------------|------------------------------------------------|------------|---------|----|----|----|-------|--------|------------------------------------------------------|----------|
| Control | 6018 | ADPGK protein                          | gi 126010731,gi 126722892,gi 205686178         | 54,066.80  | 99.80%  | 2  | 2  | 2  | 0.02% | 9.66%  | NDLEEA 2.06<br>FVHFMG<br>K                           | 1,552.71 |
| Control | 6018 | integrin alpha-V subunit               | gi 11596385,gi 124056464                       | 116,117.20 | 100.00% | 15 | 17 | 32 | 0.31% | 17.30% | DYAKDD 3.03<br>PLEFK                                 | 1,340.64 |
| Control | 6018 | integrin alpha-V subunit               | gi 11596385,gi 124056464                       | 116,117.20 | 100.00% | 15 | 17 | 32 | 0.31% | 17.30% | ENPETEE 3.44<br>DVGPPV<br>QHIELR                     | 2,353.13 |
| Control | 6018 | integrin alpha-V subunit               | gi 11596385,gi 124056464                       | 116,117.20 | 100.00% | 15 | 17 | 32 | 0.31% | 17.30% | FDLQIQS 4<br>SNLFDK                                  | 1,554.78 |
| Control | 6018 | integrin alpha-V subunit               | gi 11596385,gi 124056464                       | 116,117.20 | 100.00% | 15 | 17 | 32 | 0.31% | 17.30% | FDLQIQS 4.12<br>SNLFDK<br>VSPVVS<br>YK               | 2,414.26 |
| Control | 6018 | integrin alpha-V subunit               | gi 11596385,gi 124056464                       | 116,117.20 | 100.00% | 15 | 17 | 32 | 0.31% | 17.30% | FGSAIAP 3.79<br>LGDLDDQ<br>DGFNDI<br>AIAAPY<br>GGEDK | 3,037.44 |
| Control | 6018 | integrin alpha-V subunit               | gi 11596385,gi 124056464                       | 116,117.20 | 100.00% | 15 | 17 | 32 | 0.31% | 17.30% | FGSAIAP 5.4<br>LGDLDDQ<br>DGFNDI<br>AIAAPY<br>GGEDKK | 3,165.54 |
| Control | 6018 | integrin alpha-V subunit               | gi 11596385,gi 124056464                       | 116,117.20 | 100.00% | 15 | 17 | 32 | 0.31% | 17.30% | FSVHQQ 3.3<br>SEMDTS<br>VK                           | 1,638.74 |
| Control | 6018 | integrin alpha-V subunit               | gi 11596385,gi 124056464                       | 116,117.20 | 100.00% | 15 | 17 | 32 | 0.31% | 17.30% | GATDID 5.03<br>KNGYPD<br>LIVGAFG<br>VDR              | 2,293.15 |
| Control | 6018 | integrin alpha-V subunit               | gi 11596385,gi 124056464                       | 116,117.20 | 100.00% | 15 | 17 | 32 | 0.31% | 17.30% | GIVYIFN 4.25<br>GRPTGL<br>NAVPSQI<br>LEGK            | 2,543.40 |
| Control | 6018 | integrin alpha-V subunit               | gi 11596385,gi 124056464                       | 116,117.20 | 100.00% | 15 | 17 | 32 | 0.31% | 17.30% | IYIGDDN 4.22<br>PLTLIVK                              | 1,573.88 |
| Control | 6018 | integrin alpha-V subunit               | gi 11596385,gi 124056464                       | 116,117.20 | 100.00% | 15 | 17 | 32 | 0.31% | 17.30% | MFLLVG 3.86<br>APK                                   | 991.5647 |
| Control | 6018 | integrin alpha-V subunit               | gi 11596385,gi 124056464                       | 116,117.20 | 100.00% | 15 | 17 | 32 | 0.31% | 17.30% | NGYPDLI 3.27<br>VGAFGV<br>DR                         | 1,592.81 |
| Control | 6018 | integrin alpha-V subunit               | gi 11596385,gi 124056464                       | 116,117.20 | 100.00% | 15 | 17 | 32 | 0.31% | 17.30% | PTGLNA 4.09<br>VPSQILE<br>GK                         | 1,523.84 |
| Control | 6018 | integrin alpha-V subunit               | gi 11596385,gi 124056464                       | 116,117.20 | 100.00% | 15 | 17 | 32 | 0.31% | 17.30% | SSASFNV 3.83<br>IEFPYK                               | 1,488.74 |
| Control | 6018 | integrin alpha-V subunit               | gi 11596385,gi 124056464                       | 116,117.20 | 100.00% | 15 | 17 | 32 | 0.31% | 17.30% | YKENPE 4.29<br>TEEDVG<br>PVVQHI<br>YELR              | 2,644.29 |
| Control | 6018 | poly(A) binding protein, cytoplasmic 1 | gi 41386798,gi 47117093,gi 74268035,gi 8979741 | 70,653.30  | 100.00% | 3  | 3  | 3  | 0.03% | 6.60%  | ALDTMN 2.81<br>FDVIK                                 | 1,282.64 |
| Control | 6018 | poly(A) binding protein, cytoplasmic 1 | gi 41386798,gi 47117093,gi 74268035,gi 8979741 | 70,653.30  | 100.00% | 3  | 3  | 3  | 0.03% | 6.60%  | IVATKPL 2.43<br>YVALAQ<br>R                          | 1,542.94 |

|         |      |                                                                                                             |                                                                                       |           |         |   |   |   |       |       |                        |      |          |
|---------|------|-------------------------------------------------------------------------------------------------------------|---------------------------------------------------------------------------------------|-----------|---------|---|---|---|-------|-------|------------------------|------|----------|
| Control | 6018 | poly(A) binding protein, cytoplasmic 1                                                                      | gi 41386798,gi 47117093,gi 74268035,gi 8979741                                        | 70,653.30 | 100.00% | 3 | 3 | 3 | 0.03% | 6.60% | SLGYAY VNFQQP ADAER    | 2.73 | 1,928.91 |
| Control | 6018 | RecName : Full=Monocarboxylate transporter 1; Short=MeCT 1; AltName: Full=Solute carrier family 16 member 1 | gi 122139973,gi 77567740,gi 82617542                                                  | 54,281.70 | 100.00% | 3 | 4 | 5 | 0.05% | 3.79% | GASDAN TDLIGG NPK      | 4.65 | 1,429.69 |
| Control | 6018 | RecName : Full=Monocarboxylate transporter 1; Short=MeCT 1; AltName: Full=Solute carrier family 16 member 1 | gi 122139973,gi 77567740,gi 82617542                                                  | 54,281.70 | 100.00% | 3 | 4 | 5 | 0.05% | 3.79% | GASDAN TDLIGG NPKEEK   | 3.97 | 1,815.87 |
| Control | 6018 | RecName : Full=Monocarboxylate transporter 1; Short=MeCT 1; AltName: Full=Solute carrier family 16 member 1 | gi 122139973,gi 77567740,gi 82617542                                                  | 54,281.70 | 100.00% | 3 | 4 | 5 | 0.05% | 3.79% | GASDAN TDLIGG NPKEEK K | 2.82 | 1,943.97 |
| Control | 6018 | RecName : Full=L-lactate dehydrogenase B chain; Short=L-DH-B                                                | gi 118572666,gi 148744825,gi 154425698,gi 27806561,gi 59858383,gi 74353944,gi 8979739 | 36,679.70 | 99.80%  | 2 | 2 | 3 | 0.03% | 7.49% | IVADKD YSVTAN SK       | 4.53 | 1,510.77 |

|         |      |                                                                                                        |                                                                                                                                                                                                   |           |         |   |   |    |       |        |                                               |      |          |
|---------|------|--------------------------------------------------------------------------------------------------------|---------------------------------------------------------------------------------------------------------------------------------------------------------------------------------------------------|-----------|---------|---|---|----|-------|--------|-----------------------------------------------|------|----------|
| Control | 6018 | RecName<br>: Full=L-<br>lactate<br>dehydrog<br>enase B<br>chain;<br>Short=L<br>DH-B                    | gi 1185726<br>66,gi 14874<br>4825,gi 154<br>425698,gi 2<br>7806561,gi <br>59858383,g<br>i 74353944,<br>gi 8979739                                                                                 | 36,679.70 | 99.80%  | 2 | 2 | 3  | 0.03% | 7.49%  | LKDEEV<br>AQLKK                               | 3.02 | 1,300.75 |
| Control | 6018 | PREDIC<br>TED:<br>similar to<br>program<br>med cell<br>death 6<br>interactin<br>g protein<br>isoform 1 | gi 1199142<br>74                                                                                                                                                                                  | 96,862.00 | 99.80%  | 2 | 2 | 2  | 0.02% | 2.74%  | LLDEEE<br>ATDNDL<br>R                         | 2.88 | 1,532.71 |
| Control | 6018 | PREDIC<br>TED:<br>similar to<br>program<br>med cell<br>death 6<br>interactin<br>g protein<br>isoform 1 | gi 1199142<br>74                                                                                                                                                                                  | 96,862.00 | 99.80%  | 2 | 2 | 2  | 0.02% | 2.74%  | NIQVSH<br>QEFSK                               | 3.47 | 1,316.66 |
| Control | 6018 | Sec61<br>alpha 1<br>subunit<br>(S.<br>cerevisiae<br>)                                                  | gi 1544261<br>40,gi 59857<br>767,gi 7506<br>0961,gi 949<br>66817                                                                                                                                  | 52,208.90 | 100.00% | 3 | 6 | 15 | 0.15% | 15.10% | GMEFEG<br>AIIALFH<br>LLATR                    | 4.47 | 2,005.06 |
| Control | 6018 | Sec61<br>alpha 1<br>subunit<br>(S.<br>cerevisiae<br>)                                                  | gi 1544261<br>40,gi 59857<br>767,gi 7506<br>0961,gi 949<br>66817                                                                                                                                  | 52,208.90 | 100.00% | 3 | 6 | 15 | 0.15% | 15.10% | GTMEL<br>GISPIVTS<br>GLIMQL<br>LAGAK          | 4.5  | 2,529.40 |
| Control | 6018 | Sec61<br>alpha 1<br>subunit<br>(S.<br>cerevisiae<br>)                                                  | gi 1544261<br>40,gi 59857<br>767,gi 7506<br>0961,gi 949<br>66817                                                                                                                                  | 52,208.90 | 100.00% | 3 | 6 | 15 | 0.15% | 15.10% | LFYTSNI<br>PIILQSAL<br>VSNLYVI<br>SQMLSA<br>R | 4.89 | 3,270.78 |
| Control | 6018 | Actin<br>related<br>protein<br>2/3<br>complex,<br>subunit 4,<br>20kDa                                  | gi 1099399<br>45,gi 11549<br>5705,gi 119<br>361249,gi 1<br>49243014,g<br>i 14924302<br>9,gi 149243<br>036,gi 1492<br>43043,gi 14<br>9243050,gi <br>149243057,<br>gi 1492430<br>64,gi 56966<br>197 | 19,649.40 | 99.80%  | 2 | 2 | 3  | 0.03% | 11.30% | AENFFIL<br>R                                  | 2.46 | 1,009.55 |

|         |      |                                                     |                                                                                                                                                |           |         |    |    |    |       |        |                                 |      |          |
|---------|------|-----------------------------------------------------|------------------------------------------------------------------------------------------------------------------------------------------------|-----------|---------|----|----|----|-------|--------|---------------------------------|------|----------|
| Control | 6018 | Actin related protein 2/3 complex, subunit 4, 20kDa | gi 109939945,gi 115495705,gi 1192361249,gi 149243014,gi 149243029,gi 149243036,gi 149243043,gi 149243050,gi 149243057,gi 149243064,gi 56966197 | 19,649.40 | 99.80%  | 2  | 2  | 3  | 0.03% | 11.30% | ELLQPV<br>VTISR                 | 3.58 | 1,268.76 |
| Control | 6018 | H(+)-transporting ATP synthase                      | gi 102,gi 114402,gi 158429020,gi 158429022,gi 158431066,gi 158431067,gi 158431068,gi 27807237                                                  | 55,248.00 | 100.00% | 21 | 24 | 44 | 0.43% | 53.70% | AVDSL<br>PIGR                   | 3.01 | 1,026.59 |
| Control | 6018 | H(+)-transporting ATP synthase                      | gi 102,gi 114402,gi 158429020,gi 158429022,gi 158431066,gi 158431067,gi 158431068,gi 27807237                                                  | 55,248.00 | 100.00% | 21 | 24 | 44 | 0.43% | 53.70% | EAYPG<br>VFYLR                  | 3.55 | 1,553.74 |
| Control | 6018 | H(+)-transporting ATP synthase                      | gi 102,gi 114402,gi 158429020,gi 158429022,gi 158431066,gi 158431067,gi 158431068,gi 27807237                                                  | 55,248.00 | 100.00% | 21 | 24 | 44 | 0.43% | 53.70% | EVAFA<br>QFGDL<br>DAATQ<br>LLSR | 4.3  | 2,338.17 |
| Control | 6018 | H(+)-transporting ATP synthase                      | gi 102,gi 114402,gi 158429020,gi 158429022,gi 158431066,gi 158431067,gi 158431068,gi 27807237                                                  | 55,248.00 | 100.00% | 21 | 24 | 44 | 0.43% | 53.70% | FENAF<br>HVISQ<br>QALLSK        | 4.65 | 2,169.15 |
| Control | 6018 | H(+)-transporting ATP synthase                      | gi 102,gi 114402,gi 158429020,gi 158429022,gi 158431066,gi 158431067,gi 158431068,gi 27807237                                                  | 55,248.00 | 100.00% | 21 | 24 | 44 | 0.43% | 53.70% | GIRPA<br>VGLSV<br>R             | 2.83 | 1,438.85 |

|         |      |                                           |                                                                                                                                                |           |         |    |    |    |       |        |                                         |          |
|---------|------|-------------------------------------------|------------------------------------------------------------------------------------------------------------------------------------------------|-----------|---------|----|----|----|-------|--------|-----------------------------------------|----------|
| Control | 6018 | H(+)-<br>transporti<br>ng ATP<br>synthase | gi 102,gi 11<br>4402,gi 158<br>429020,gi 1<br>58429021,g<br>i 15842902<br>2,gi 158431<br>066,gi 1584<br>31067,gi 15<br>8431068,gi <br>27807237 | 55,248.00 | 100.00% | 21 | 24 | 44 | 0.43% | 53.70% | GMSLNL 6.37<br>EPDNVG<br>VVVFGN<br>DK   | 2,120.03 |
| Control | 6018 | H(+)-<br>transporti<br>ng ATP<br>synthase | gi 102,gi 11<br>4402,gi 158<br>429020,gi 1<br>58429021,g<br>i 15842902<br>2,gi 158431<br>066,gi 1584<br>31067,gi 15<br>8431068,gi <br>27807237 | 55,248.00 | 100.00% | 21 | 24 | 44 | 0.43% | 53.70% | GYLDKL 2.78<br>EPSK                     | 1,149.62 |
| Control | 6018 | H(+)-<br>transporti<br>ng ATP<br>synthase | gi 102,gi 11<br>4402,gi 158<br>429020,gi 1<br>58429021,g<br>i 15842902<br>2,gi 158431<br>066,gi 1584<br>31067,gi 15<br>8431068,gi <br>27807237 | 55,248.00 | 100.00% | 21 | 24 | 44 | 0.43% | 53.70% | HALIYD 3.2<br>DLSK                      | 1,287.69 |
| Control | 6018 | H(+)-<br>transporti<br>ng ATP<br>synthase | gi 102,gi 11<br>4402,gi 158<br>429020,gi 1<br>58429021,g<br>i 15842902<br>2,gi 158431<br>066,gi 1584<br>31067,gi 15<br>8431068,gi <br>27807237 | 55,248.00 | 100.00% | 21 | 24 | 44 | 0.43% | 53.70% | ILGADTS 4.56<br>VDLEET<br>GR            | 1,575.79 |
| Control | 6018 | H(+)-<br>transporti<br>ng ATP<br>synthase | gi 102,gi 11<br>4402,gi 158<br>429020,gi 1<br>58429021,g<br>i 15842902<br>2,gi 158431<br>066,gi 1584<br>31067,gi 15<br>8431068,gi <br>27807237 | 55,248.00 | 100.00% | 21 | 24 | 44 | 0.43% | 53.70% | ITKFENA 3.68<br>FLSHVIS<br>QHQALL<br>SK | 2,511.37 |
| Control | 6018 | H(+)-<br>transporti<br>ng ATP<br>synthase | gi 102,gi 11<br>4402,gi 158<br>429020,gi 1<br>58429021,g<br>i 15842902<br>2,gi 158431<br>066,gi 1584<br>31067,gi 15<br>8431068,gi <br>27807237 | 55,248.00 | 100.00% | 21 | 24 | 44 | 0.43% | 53.70% | LELAQY 2.35<br>R                        | 892.4887 |

|         |      |                                           |                                                                                                                                                |           |         |    |    |    |       |        |                                        |          |
|---------|------|-------------------------------------------|------------------------------------------------------------------------------------------------------------------------------------------------|-----------|---------|----|----|----|-------|--------|----------------------------------------|----------|
| Control | 6018 | H(+)-<br>transporti<br>ng ATP<br>synthase | gi 102,gi 11<br>4402,gi 158<br>429020,gi 1<br>58429021,g<br>i 15842902<br>2,gi 158431<br>066,gi 1584<br>31067,gi 15<br>8431068,gi <br>27807237 | 55,248.00 | 100.00% | 21 | 24 | 44 | 0.43% | 53.70% | LKEIVTN 3.91<br>FLAGFE<br>A            | 1,551.84 |
| Control | 6018 | H(+)-<br>transporti<br>ng ATP<br>synthase | gi 102,gi 11<br>4402,gi 158<br>429020,gi 1<br>58429021,g<br>i 15842902<br>2,gi 158431<br>066,gi 1584<br>31067,gi 15<br>8431068,gi <br>27807237 | 55,248.00 | 100.00% | 21 | 24 | 44 | 0.43% | 53.70% | NVQAEE 3.68<br>MVEFSS<br>GLK           | 1,683.79 |
| Control | 6018 | H(+)-<br>transporti<br>ng ATP<br>synthase | gi 102,gi 11<br>4402,gi 158<br>429020,gi 1<br>58429021,g<br>i 15842902<br>2,gi 158431<br>066,gi 1584<br>31067,gi 15<br>8431068,gi <br>27807237 | 55,248.00 | 100.00% | 21 | 24 | 44 | 0.43% | 53.70% | QGQYSP 3.57<br>MAIEEQ<br>VAVIYA<br>GVR | 2,325.15 |
| Control | 6018 | H(+)-<br>transporti<br>ng ATP<br>synthase | gi 102,gi 11<br>4402,gi 158<br>429020,gi 1<br>58429021,g<br>i 15842902<br>2,gi 158431<br>066,gi 1584<br>31067,gi 15<br>8431068,gi <br>27807237 | 55,248.00 | 100.00% | 21 | 24 | 44 | 0.43% | 53.70% | TGAIVD 4.73<br>VPVGEE<br>LLGR          | 1,624.89 |
| Control | 6018 | H(+)-<br>transporti<br>ng ATP<br>synthase | gi 102,gi 11<br>4402,gi 158<br>429020,gi 1<br>58429021,g<br>i 15842902<br>2,gi 158431<br>066,gi 1584<br>31067,gi 15<br>8431068,gi <br>27807237 | 55,248.00 | 100.00% | 21 | 24 | 44 | 0.43% | 53.70% | TGTAEV 3.58<br>SSILEER                 | 1,391.70 |
| Control | 6018 | H(+)-<br>transporti<br>ng ATP<br>synthase | gi 102,gi 11<br>4402,gi 158<br>429020,gi 1<br>58429021,g<br>i 15842902<br>2,gi 158431<br>066,gi 1584<br>31067,gi 15<br>8431068,gi <br>27807237 | 55,248.00 | 100.00% | 21 | 24 | 44 | 0.43% | 53.70% | TSIAIDTI 3.23<br>INQK                  | 1,316.74 |



|         |      |                                                             |                                                                                                                                                |           |         |    |    |    |       |        |                                  |      |          |
|---------|------|-------------------------------------------------------------|------------------------------------------------------------------------------------------------------------------------------------------------|-----------|---------|----|----|----|-------|--------|----------------------------------|------|----------|
| Control | 6018 | H(+)-<br>transporti<br>ng ATP<br>synthase                   | gi 102,gi 11<br>4402,gi 158<br>429020,gi 1<br>58429021,g<br>i 15842902<br>2,gi 158431<br>066,gi 1584<br>31067,gi 15<br>8431068,gi <br>27807237 | 55,248.00 | 100.00% | 21 | 24 | 44 | 0.43% | 53.70% | VGLKAP<br>GIIPR                  | 3.46 | 1,120.72 |
| Control | 6018 | H(+)-<br>transporti<br>ng ATP<br>synthase                   | gi 102,gi 11<br>4402,gi 158<br>429020,gi 1<br>58429021,g<br>i 15842902<br>2,gi 158431<br>066,gi 1584<br>31067,gi 15<br>8431068,gi <br>27807237 | 55,248.00 | 100.00% | 21 | 24 | 44 | 0.43% | 53.70% | VLSIGDG<br>IAR                   | 2.84 | 1,000.58 |
| Control | 6018 | H(+)-<br>transporti<br>ng ATP<br>synthase                   | gi 102,gi 11<br>4402,gi 158<br>429020,gi 1<br>58429021,g<br>i 15842902<br>2,gi 158431<br>066,gi 1584<br>31067,gi 15<br>8431068,gi <br>27807237 | 55,248.00 | 100.00% | 21 | 24 | 44 | 0.43% | 53.70% | VVDALG<br>NAIDGK                 | 4.04 | 1,171.63 |
| Control | 6018 | H(+)-<br>transporti<br>ng ATP<br>synthase                   | gi 102,gi 11<br>4402,gi 158<br>429020,gi 1<br>58429021,g<br>i 15842902<br>2,gi 158431<br>066,gi 1584<br>31067,gi 15<br>8431068,gi <br>27807237 | 55,248.00 | 100.00% | 21 | 24 | 44 | 0.43% | 53.70% | VVDALG<br>NAIDGK<br>GPIGSK       | 4.93 | 1,710.94 |
| Control | 6018 | SEC22<br>vesicle<br>traffickin<br>g protein<br>homolog<br>B | gi 1154964<br>88,gi 74354<br>583                                                                                                               | 28,710.00 | 100.00% | 5  | 8  | 14 | 0.14% | 29.90% | IMVANIE<br>EVLQR                 | 4.89 | 1,430.77 |
| Control | 6018 | SEC22<br>vesicle<br>traffickin<br>g protein<br>homolog<br>B | gi 1154964<br>88,gi 74354<br>583                                                                                                               | 28,710.00 | 100.00% | 5  | 8  | 14 | 0.14% | 29.90% | KLAFAY<br>LEDLHS<br>EFDEQH<br>GK | 4.47 | 2,377.15 |
| Control | 6018 | SEC22<br>vesicle<br>traffickin<br>g protein<br>homolog<br>B | gi 1154964<br>88,gi 74354<br>583                                                                                                               | 28,710.00 | 100.00% | 5  | 8  | 14 | 0.14% | 29.90% | NLGSINT<br>ELQDVQ<br>R           | 5.15 | 1,586.81 |
| Control | 6018 | SEC22<br>vesicle<br>traffickin<br>g protein<br>homolog<br>B | gi 1154964<br>88,gi 74354<br>583                                                                                                               | 28,710.00 | 100.00% | 5  | 8  | 14 | 0.14% | 29.90% | VADGLP<br>LAASMQ<br>EDEQSG<br>R  | 4.93 | 1,989.92 |

|         |      |                                              |                                              |           |         |   |   |    |       |        |                                                    |          |
|---------|------|----------------------------------------------|----------------------------------------------|-----------|---------|---|---|----|-------|--------|----------------------------------------------------|----------|
| Control | 6018 | SEC22 vesicle traffickin g protein homolog B | gi 115496488,gi 74354583                     | 28,710.00 | 100.00% | 5 | 8 | 14 | 0.14% | 29.90% | VADGLP 4.35<br>LAASMQ<br>EDEQSG<br>RDLQQY<br>QSQAK | 3,179.49 |
| Control | 6018 | GTP-binding protein (smg p21B)               | gi 163722,gi 28461271,gi 4711772,gi 74354581 | 20,806.90 | 100.00% | 5 | 5 | 8  | 0.08% | 27.70% | INVNEIF 4.99<br>YDLVR                              | 1,494.80 |
| Control | 6018 | GTP-binding protein (smg p21B)               | gi 163722,gi 28461271,gi 4711772,gi 74354581 | 20,806.90 | 100.00% | 5 | 5 | 8  | 0.08% | 27.70% | LVVLGS 2.8<br>GGVGK                                | 985.6042 |
| Control | 6018 | GTP-binding protein (smg p21B)               | gi 163722,gi 28461271,gi 4711772,gi 74354581 | 20,806.90 | 100.00% | 5 | 5 | 8  | 0.08% | 27.70% | SKINVNE 3.61<br>IFYDLVR                            | 1,709.92 |
| Control | 6018 | GTP-binding protein (smg p21B)               | gi 163722,gi 28461271,gi 4711772,gi 74354581 | 20,806.90 | 100.00% | 5 | 5 | 8  | 0.08% | 27.70% | VKDTDD 4.36<br>VPMILV<br>GNK                       | 1,659.86 |
| Control | 6018 | GTP-binding protein (smg p21B)               | gi 163722,gi 28461271,gi 4711772,gi 74354581 | 20,806.90 | 100.00% | 5 | 5 | 8  | 0.08% | 27.70% | YDPTIED 2.69<br>SYRK                               | 1,386.65 |
| Control | 6018 | metadherin                                   | gi 114051299,gi 89994114                     | 64,037.90 | 100.00% | 7 | 8 | 8  | 0.08% | 14.60% | EEAAAA 4.07<br>APAPAA<br>DDQGV<br>K                | 1,794.89 |
| Control | 6018 | metadherin                                   | gi 114051299,gi 89994114                     | 64,037.90 | 100.00% | 7 | 8 | 8  | 0.08% | 14.60% | KREEAA 4<br>AAAPAP<br>AADDQG<br>VLK                | 2,079.08 |
| Control | 6018 | metadherin                                   | gi 114051299,gi 89994114                     | 64,037.90 | 100.00% | 7 | 8 | 8  | 0.08% | 14.60% | LQEMLS 2.88<br>VGLGFL<br>R                         | 1,478.80 |
| Control | 6018 | metadherin                                   | gi 114051299,gi 89994114                     | 64,037.90 | 100.00% | 7 | 8 | 8  | 0.08% | 14.60% | NKGDSH 2.84<br>LNVQVS<br>NFK                       | 1,686.86 |
| Control | 6018 | metadherin                                   | gi 114051299,gi 89994114                     | 64,037.90 | 100.00% | 7 | 8 | 8  | 0.08% | 14.60% | TEGLD 3.35<br>LGLPEK                               | 1,284.70 |
| Control | 6018 | metadherin                                   | gi 114051299,gi 89994114                     | 64,037.90 | 100.00% | 7 | 8 | 8  | 0.08% | 14.60% | TIEVAEE 2.88<br>EVVR                               | 1,273.66 |
| Control | 6018 | metadherin                                   | gi 114051299,gi 89994114                     | 64,037.90 | 100.00% | 7 | 8 | 8  | 0.08% | 14.60% | TISTSDP 2.73<br>ADALIK                             | 1,331.71 |

|         |      |                                                                                                                                                                             |                                                                                 |           |         |   |   |   |       |        |                                  |      |          |
|---------|------|-----------------------------------------------------------------------------------------------------------------------------------------------------------------------------|---------------------------------------------------------------------------------|-----------|---------|---|---|---|-------|--------|----------------------------------|------|----------|
| Control | 6018 | RecName<br>:<br>Full=Aco<br>nitrate<br>hydratase<br>,<br>mitochon<br>drial;<br>Short=Ac<br>onitase;<br>AltName:<br>Full=Citr<br>ate hydro-<br>lyase;<br>Flags:<br>Precursor | gi 1102829<br>35,gi 13642<br>16,gi 27806<br>769,gi 7426<br>8076,gi 909<br>70312 | 85,342.00 | 99.80%  | 2 | 2 | 2 | 0.02% | 3.72%  | IVYGHL<br>DDPANQ<br>EIER         | 5.11 | 1,868.91 |
| Control | 6018 | RecName<br>:<br>Full=Aco<br>nitrate<br>hydratase<br>,<br>mitochon<br>drial;<br>Short=Ac<br>onitase;<br>AltName:<br>Full=Citr<br>ate hydro-<br>lyase;<br>Flags:<br>Precursor | gi 1102829<br>35,gi 13642<br>16,gi 27806<br>769,gi 7426<br>8076,gi 909<br>70312 | 85,342.00 | 99.80%  | 2 | 2 | 2 | 0.02% | 3.72%  | SQFTTIP<br>GSEQIR                | 3.58 | 1,463.75 |
| Control | 6018 | RecName<br>:<br>Full=AT<br>P<br>synthase<br>subunit g,<br>mitochon<br>drial;<br>Short=A<br>TPase<br>subunit g                                                               | gi 2493093,<br>gi 7435401<br>2,gi 757992<br>2,gi 944008<br>70                   | 11,604.00 | 100.00% | 3 | 4 | 7 | 0.07% | 37.50% | APALVN<br>AAVTYS<br>KPR          | 5.36 | 1,557.87 |
| Control | 6018 | RecName<br>:<br>Full=AT<br>P<br>synthase<br>subunit g,<br>mitochon<br>drial;<br>Short=A<br>TPase<br>subunit g                                                               | gi 2493093,<br>gi 7435401<br>2,gi 757992<br>2,gi 944008<br>70                   | 11,604.00 | 100.00% | 3 | 4 | 7 | 0.07% | 37.50% | NLAEKA<br>PALVNA<br>AVTYSK<br>PR | 4.78 | 2,113.18 |
| Control | 6018 | RecName<br>:<br>Full=AT<br>P<br>synthase<br>subunit g,<br>mitochon<br>drial;<br>Short=A<br>TPase<br>subunit g                                                               | gi 2493093,<br>gi 7435401<br>2,gi 757992<br>2,gi 944008<br>70                   | 11,604.00 | 100.00% | 3 | 4 | 7 | 0.07% | 37.50% | VELVPP<br>TPAEIPT<br>AIQSLK      | 2.57 | 2,003.14 |

|         |      |                                                                                         |                                                                   |           |         |   |   |   |       |        |                                  |      |          |
|---------|------|-----------------------------------------------------------------------------------------|-------------------------------------------------------------------|-----------|---------|---|---|---|-------|--------|----------------------------------|------|----------|
| Control | 6018 | guanine<br>nucleotid<br>e binding<br>protein<br>(G<br>protein),<br>q<br>polypepti<br>de | gi 1585085<br>58                                                  | 42,125.60 | 99.80%  | 2 | 2 | 2 | 0.02% | 15.60% | DTILQLN<br>LK                    | 2.52 | 1,057.63 |
| Control | 6018 | guanine<br>nucleotid<br>e binding<br>protein<br>(G<br>protein),<br>q<br>polypepti<br>de | gi 1585085<br>58                                                  | 42,125.60 | 99.80%  | 2 | 2 | 2 | 0.02% | 15.60% | LLLLGT<br>GESGK                  | 2.79 | 1,087.64 |
| Control | 6018 | guanine<br>nucleotid<br>e binding<br>protein<br>(G<br>protein),<br>q<br>polypepti<br>de | gi 1585085<br>58                                                  | 42,125.60 | 99.80%  | 2 | 2 | 2 | 0.02% | 15.60% | VADPAY<br>LPTQQD<br>VLR          | 3.56 | 1,685.89 |
| Control | 6018 | guanine<br>nucleotid<br>e binding<br>protein<br>(G<br>protein),<br>q<br>polypepti<br>de | gi 1585085<br>58                                                  | 42,125.60 | 99.80%  | 2 | 2 | 2 | 0.02% | 15.60% | VRVPTT<br>GHEYPF<br>DLQSVIF<br>R | 5.6  | 2,450.34 |
| Control | 6018 | PREDIC<br>TED:<br>similar to<br>CDW92<br>antigen<br>isoform 1                           | gi 1199009<br>17,gi 11990<br>0919                                 | 72,875.80 | 100.00% | 4 | 4 | 4 | 0.04% | 8.23%  | LPVPAS<br>APIPFFH<br>R           | 3.65 | 1,548.87 |
| Control | 6018 | PREDIC<br>TED:<br>similar to<br>CDW92<br>antigen<br>isoform 1                           | gi 1199009<br>17,gi 11990<br>0919                                 | 72,875.80 | 100.00% | 4 | 4 | 4 | 0.04% | 8.23%  | NAELEAI<br>PNSGMD<br>HTHR        | 2.79 | 1,907.87 |
| Control | 6018 | PREDIC<br>TED:<br>similar to<br>CDW92<br>antigen<br>isoform 1                           | gi 1199009<br>17,gi 11990<br>0919                                 | 72,875.80 | 100.00% | 4 | 4 | 4 | 0.04% | 8.23%  | NLPFTPI<br>LASVNR                | 3.27 | 1,441.82 |
| Control | 6018 | PREDIC<br>TED:<br>similar to<br>CDW92<br>antigen<br>isoform 1                           | gi 1199009<br>17,gi 11990<br>0919                                 | 72,875.80 | 100.00% | 4 | 4 | 4 | 0.04% | 8.23%  | VLMEFV<br>ENSR                   | 3.29 | 1,239.60 |
| Control | 6018 | RecName<br>:<br>Full=60S<br>ribosomal<br>protein<br>L7a                                 | gi 1088609<br>39,gi 14623<br>1828,gi 836<br>38795,gi 94<br>966839 | 30,008.40 | 99.80%  | 2 | 2 | 3 | 0.03% | 10.20% | LKVPPAI<br>NQFTQA<br>LDR         | 5.19 | 1,811.02 |

|         |      |                                                                                                                                                                                                     |                                                                   |           |         |   |   |   |       |        |                                           |      |          |
|---------|------|-----------------------------------------------------------------------------------------------------------------------------------------------------------------------------------------------------|-------------------------------------------------------------------|-----------|---------|---|---|---|-------|--------|-------------------------------------------|------|----------|
| Control | 6018 | RecName<br>:<br>Full=60S<br>ribosomal<br>protein<br>L7a                                                                                                                                             | gi 1088609<br>39,gi 14623<br>1828,gi 836<br>38795,gi 94<br>966839 | 30,008.40 | 99.80%  | 2 | 2 | 3 | 0.03% | 10.20% | NFGIGQ<br>DIQPK                           | 2.87 | 1,216.63 |
| Control | 6018 | RecName<br>:<br>Full=Tra<br>nsgelin;<br>AltName:<br>Full=Smo<br>oth<br>muscle<br>protein<br>22-alpha;<br>Short=S<br>M22-<br>alpha;<br>AltName:<br>Full=25<br>kDa F-<br>actin-<br>binding<br>protein | gi 1099403<br>20,gi 11405<br>1586,gi 868<br>23808                 | 22,580.80 | 100.00% | 4 | 4 | 4 | 0.04% | 30.30% | EFTESQL<br>QEGK                           | 2.75 | 1,295.61 |
| Control | 6018 | RecName<br>:<br>Full=Tra<br>nsgelin;<br>AltName:<br>Full=Smo<br>oth<br>muscle<br>protein<br>22-alpha;<br>Short=S<br>M22-<br>alpha;<br>AltName:<br>Full=25<br>kDa F-<br>actin-<br>binding<br>protein | gi 1099403<br>20,gi 11405<br>1586,gi 868<br>23808                 | 22,580.80 | 100.00% | 4 | 4 | 4 | 0.04% | 30.30% | LVNSLY<br>PDGSKP<br>VKVPEN<br>PPSMVF<br>K | 3.37 | 2,758.45 |
| Control | 6018 | RecName<br>:<br>Full=Tra<br>nsgelin;<br>AltName:<br>Full=Smo<br>oth<br>muscle<br>protein<br>22-alpha;<br>Short=S<br>M22-<br>alpha;<br>AltName:<br>Full=25<br>kDa F-<br>actin-<br>binding<br>protein | gi 1099403<br>20,gi 11405<br>1586,gi 868<br>23808                 | 22,580.80 | 100.00% | 4 | 4 | 4 | 0.04% | 30.30% | TDMFQT<br>VDLFEG<br>K                     | 3.12 | 1,546.71 |

|         |      |                                                                                                                                                                                                                                         |           |         |   |   |   |       |        |                          |      |          |
|---------|------|-----------------------------------------------------------------------------------------------------------------------------------------------------------------------------------------------------------------------------------------|-----------|---------|---|---|---|-------|--------|--------------------------|------|----------|
| Control | 6018 | RecName gi 1099403<br>: 20,gi 11405<br>Full=Tra 1586,gi 868<br>nsgelin; 23808<br>AltName:<br>Full=Smoth<br>muscle<br>protein<br>22-alpha;<br>Short=S<br>M22-<br>alpha;<br>AltName:<br>Full=25<br>kDa F-<br>actin-<br>binding<br>protein | 22,580.80 | 100.00% | 4 | 4 | 4 | 0.04% | 30.30% | TLMALG<br>SLAVTK         | 3.68 | 1,220.69 |
| Control | 6018 | RecName gi 1098924<br>: 71,gi 74268<br>Full=Euk 155,gi 7773<br>aryotic 5407<br>initiation<br>factor 4A-<br>I;<br>Short=eIF<br>F-4A-I;<br>Short=eIF<br>F4A-I;<br>AltName:<br>Full=AT<br>P-<br>dependen<br>t RNA<br>helicase<br>eIF4A-1   | 46,137.30 | 100.00% | 5 | 6 | 6 | 0.06% | 16.50% | GFKDQI<br>YDIFQK         | 3.52 | 1,501.77 |
| Control | 6018 | RecName gi 1098924<br>: 71,gi 74268<br>Full=Euk 155,gi 7773<br>aryotic 5407<br>initiation<br>factor 4A-<br>I;<br>Short=eIF<br>F-4A-I;<br>Short=eIF<br>F4A-I;<br>AltName:<br>Full=AT<br>P-<br>dependen<br>t RNA<br>helicase<br>eIF4A-1   | 46,137.30 | 100.00% | 5 | 6 | 6 | 0.06% | 16.50% | GIYAYG<br>FEKPSAI<br>QQR | 4.54 | 1,827.94 |

|         |      |                                                                                                                                                                                             |                                                    |           |         |   |   |   |       |        |                         |      |          |
|---------|------|---------------------------------------------------------------------------------------------------------------------------------------------------------------------------------------------|----------------------------------------------------|-----------|---------|---|---|---|-------|--------|-------------------------|------|----------|
| Control | 6018 | RecName<br>:<br>Full=Euk<br>aryotic<br>initiation<br>factor 4A-<br>I;<br>Short=el<br>F-4A-I;<br>Short=el<br>F4A-I;<br>AltName:<br>Full=AT<br>P-<br>dependen<br>t RNA<br>helicase<br>eIF4A-1 | gi 1098924<br>71.gi 74268<br>155.gi 7773<br>5407   | 46,137.30 | 100.00% | 5 | 6 | 6 | 0.06% | 16.50% | GYDVIA<br>QAQSGT<br>GK  | 3.88 | 1,394.69 |
| Control | 6018 | RecName<br>:<br>Full=Euk<br>aryotic<br>initiation<br>factor 4A-<br>I;<br>Short=el<br>F-4A-I;<br>Short=el<br>F4A-I;<br>AltName:<br>Full=AT<br>P-<br>dependen<br>t RNA<br>helicase<br>eIF4A-1 | gi 1098924<br>71.gi 74268<br>155.gi 7773<br>5407   | 46,137.30 | 100.00% | 5 | 6 | 6 | 0.06% | 16.50% | LQMEAP<br>HIIVGTP<br>GR | 3.41 | 1,634.87 |
| Control | 6018 | RecName<br>:<br>Full=Euk<br>aryotic<br>initiation<br>factor 4A-<br>I;<br>Short=el<br>F-4A-I;<br>Short=el<br>F4A-I;<br>AltName:<br>Full=AT<br>P-<br>dependen<br>t RNA<br>helicase<br>eIF4A-1 | gi 1098924<br>71.gi 74268<br>155.gi 7773<br>5407   | 46,137.30 | 100.00% | 5 | 6 | 6 | 0.06% | 16.50% | VLITDDL<br>LAR          | 2.41 | 1,114.68 |
| Control | 6018 | CDGSH<br>iron<br>sulfur<br>domain 2                                                                                                                                                         | gi 1155454<br>22.gi 12213<br>1734.gi 122<br>692399 | 15,260.70 | 99.80%  | 2 | 2 | 2 | 0.02% | 9.63%  | LPVPESI<br>TGFAR        | 2.91 | 1,286.71 |
| Control | 6018 | CDGSH<br>iron<br>sulfur<br>domain 2                                                                                                                                                         | gi 1155454<br>22.gi 12213<br>1734.gi 122<br>692399 | 15,260.70 | 99.80%  | 2 | 2 | 2 | 0.02% | 9.63%  | RLVPES<br>ITGFAR        | 3.95 | 1,442.81 |

|         |      |                                                                                                                                                          |                                                   |            |         |   |    |    |       |        |                                                 |          |
|---------|------|----------------------------------------------------------------------------------------------------------------------------------------------------------|---------------------------------------------------|------------|---------|---|----|----|-------|--------|-------------------------------------------------|----------|
| Control | 6018 | RecName<br>:<br>Full=Mit<br>ochondri<br>al Rho<br>GTPase<br>1;<br>Short=MI<br>RO-1;<br>AltName:<br>Full=Ras<br>homolog<br>gene<br>family<br>member<br>T1 | gi 1088607<br>95.gi 11405<br>1724.gi 886<br>82961 | 72,061.70  | 100.00% | 2 | 3  | 3  | 0.03% | 4.44%  | ILLVGEP 2.57<br>R                               | 896.5565 |
| Control | 6018 | RecName<br>:<br>Full=Mit<br>ochondri<br>al Rho<br>GTPase<br>1;<br>Short=MI<br>RO-1;<br>AltName:<br>Full=Ras<br>homolog<br>gene<br>family<br>member<br>T1 | gi 1088607<br>95.gi 11405<br>1724.gi 886<br>82961 | 72,061.70  | 100.00% | 2 | 3  | 3  | 0.03% | 4.44%  | ISDQDN 4.49<br>DGTLND<br>AELNFF<br>QR           | 2,312.04 |
| Control | 6018 | TMPO<br>protein                                                                                                                                          | gi 1461868<br>41.gi 14790<br>2328                 | 42,927.20  | 100.00% | 8 | 13 | 14 | 0.14% | 27.20% | DVYVQL 4.42<br>YLQHLT<br>AR                     | 1,718.92 |
| Control | 6018 | TMPO<br>protein                                                                                                                                          | gi 1461868<br>41.gi 14790<br>2328                 | 42,927.20  | 100.00% | 8 | 13 | 14 | 0.14% | 27.20% | GPPDFSS 5.42<br>DEEREP<br>TPVLGS<br>GAAVAG<br>R | 2,598.24 |
| Control | 6018 | TMPO<br>protein                                                                                                                                          | gi 1461868<br>41.gi 14790<br>2328                 | 42,927.20  | 100.00% | 8 | 13 | 14 | 0.14% | 27.20% | HAAPILP 3.22<br>ITEFSDIP<br>R                   | 1,776.96 |
| Control | 6018 | TMPO<br>protein                                                                                                                                          | gi 1461868<br>41.gi 14790<br>2328                 | 42,927.20  | 100.00% | 8 | 13 | 14 | 0.14% | 27.20% | LKSELV 5.39<br>ANNVTL<br>PAGEQR                 | 1,939.06 |
| Control | 6018 | TMPO<br>protein                                                                                                                                          | gi 1461868<br>41.gi 14790<br>2328                 | 42,927.20  | 100.00% | 8 | 13 | 14 | 0.14% | 27.20% | LKSELV 4.04<br>ANNVTL<br>PAGEQR<br>K            | 2,067.16 |
| Control | 6018 | TMPO<br>protein                                                                                                                                          | gi 1461868<br>41.gi 14790<br>2328                 | 42,927.20  | 100.00% | 8 | 13 | 14 | 0.14% | 27.20% | SELVAN 3.36<br>NVTLPA<br>GEQR                   | 1,697.88 |
| Control | 6018 | TMPO<br>protein                                                                                                                                          | gi 1461868<br>41.gi 14790<br>2328                 | 42,927.20  | 100.00% | 8 | 13 | 14 | 0.14% | 27.20% | SSTPLPT 3.38<br>ISSSVEN<br>TR                   | 1,675.85 |
| Control | 6018 | TMPO<br>protein                                                                                                                                          | gi 1461868<br>41.gi 14790<br>2328                 | 42,927.20  | 100.00% | 8 | 13 | 14 | 0.14% | 27.20% | YGVNPG 3.12<br>PIVGTR                           | 1,330.71 |
| Control | 6018 | PREDIC<br>TED:<br>talin 1                                                                                                                                | gi 1199005<br>17                                  | 269,759.80 | 100.00% | 7 | 8  | 8  | 0.08% | 4.92%  | AVSSAIA 3.89<br>QLLGEV<br>AQGNEN<br>YAGIAA<br>R | 2,573.33 |



|         |      |                           |                                   |            |         |    |    |    |       |        |                                            |          |
|---------|------|---------------------------|-----------------------------------|------------|---------|----|----|----|-------|--------|--------------------------------------------|----------|
| Control | 6018 | PREDIC<br>TED:<br>talin 1 | gi 1199005<br>17                  | 269,759.80 | 100.00% | 7  | 8  | 8  | 0.08% | 4.92%  | GVGAAA 3.61<br>TAVTQA<br>LNELLQ<br>HVR     | 2,119.16 |
| Control | 6018 | PREDIC<br>TED:<br>talin 1 | gi 1199005<br>17                  | 269,759.80 | 100.00% | 7  | 8  | 8  | 0.08% | 4.92%  | ILAQATS 4.11<br>DLVNAI<br>K                | 1,456.84 |
| Control | 6018 | PREDIC<br>TED:<br>talin 1 | gi 1199005<br>17                  | 269,759.80 | 100.00% | 7  | 8  | 8  | 0.08% | 4.92%  | LAQAAQ 3.85<br>SSVATIT<br>R                | 1,416.78 |
| Control | 6018 | PREDIC<br>TED:<br>talin 1 | gi 1199005<br>17                  | 269,759.80 | 100.00% | 7  | 8  | 8  | 0.08% | 4.92%  | LLAALL 2.51<br>EDEGGS<br>GRPLLQ<br>AAK     | 2,122.19 |
| Control | 6018 | PREDIC<br>TED:<br>talin 1 | gi 1199005<br>17                  | 269,759.80 | 100.00% | 7  | 8  | 8  | 0.08% | 4.92%  | TLSPQ 3.98<br>QMALLD<br>QTK                | 1,726.88 |
| Control | 6018 | PREDIC<br>TED:<br>talin 1 | gi 1199005<br>17                  | 269,759.80 | 100.00% | 7  | 8  | 8  | 0.08% | 4.92%  | VLGEAM 4.15<br>TGISQNA<br>K                | 1,434.73 |
| Control | 6018 | SLC25A<br>12<br>protein   | gi 1515561<br>33,gi 15537<br>2111 | 74,513.90  | 100.00% | 11 | 12 | 14 | 0.14% | 23.60% | FGLYLP 2.84<br>K                           | 837.487  |
| Control | 6018 | SLC25A<br>12<br>protein   | gi 1515561<br>33,gi 15537<br>2111 | 74,513.90  | 100.00% | 11 | 12 | 14 | 0.14% | 23.60% | FTLGSV 4.03<br>AGAVGA<br>TAVYPID<br>LVK    | 2,149.19 |
| Control | 6018 | SLC25A<br>12<br>protein   | gi 1515561<br>33,gi 15537<br>2111 | 74,513.90  | 100.00% | 11 | 12 | 14 | 0.14% | 23.60% | GLIPQLI 2.53<br>GVAPEK                     | 1,334.80 |
| Control | 6018 | SLC25A<br>12<br>protein   | gi 1515561<br>33,gi 15537<br>2111 | 74,513.90  | 100.00% | 11 | 12 | 14 | 0.14% | 23.60% | HLNYTE 5.2<br>FTQFLQE<br>LQLEHA<br>R       | 2,517.25 |
| Control | 6018 | SLC25A<br>12<br>protein   | gi 1515561<br>33,gi 15537<br>2111 | 74,513.90  | 100.00% | 11 | 12 | 14 | 0.14% | 23.60% | IAPLAEG 4.5<br>ALPYNL<br>AELQR             | 1,939.06 |
| Control | 6018 | SLC25A<br>12<br>protein   | gi 1515561<br>33,gi 15537<br>2111 | 74,513.90  | 100.00% | 11 | 12 | 14 | 0.14% | 23.60% | IVQLLAG 2.64<br>VADQTK                     | 1,355.79 |
| Control | 6018 | SLC25A<br>12<br>protein   | gi 1515561<br>33,gi 15537<br>2111 | 74,513.90  | 100.00% | 11 | 12 | 14 | 0.14% | 23.60% | LATATF 3.05<br>AGIENK                      | 1,235.66 |
| Control | 6018 | SLC25A<br>12<br>protein   | gi 1515561<br>33,gi 15537<br>2111 | 74,513.90  | 100.00% | 11 | 12 | 14 | 0.14% | 23.60% | LTLADIE 2.38<br>R                          | 930.5256 |
| Control | 6018 | SLC25A<br>12<br>protein   | gi 1515561<br>33,gi 15537<br>2111 | 74,513.90  | 100.00% | 11 | 12 | 14 | 0.14% | 23.60% | LTVNDF 2<br>VR                             | 963.5258 |
| Control | 6018 | SLC25A<br>12<br>protein   | gi 1515561<br>33,gi 15537<br>2111 | 74,513.90  | 100.00% | 11 | 12 | 14 | 0.14% | 23.60% | NIFLQYA 3.92<br>STEVDG<br>EHYMTF<br>EDFVQR | 3,005.36 |
| Control | 6018 | SLC25A<br>12<br>protein   | gi 1515561<br>33,gi 15537<br>2111 | 74,513.90  | 100.00% | 11 | 12 | 14 | 0.14% | 23.60% | YLGLYN 3.58<br>DPNSNP<br>K                 | 1,494.72 |

|         |      |                                                                                                                                                             |                                                                                      |           |         |   |   |   |       |        |                                           |          |
|---------|------|-------------------------------------------------------------------------------------------------------------------------------------------------------------|--------------------------------------------------------------------------------------|-----------|---------|---|---|---|-------|--------|-------------------------------------------|----------|
| Control | 6018 | RecName<br>:<br>Full=Elec<br>tron<br>transfer<br>flavoprot<br>ein<br>subunit<br>alpha,<br>mitochon<br>drial;<br>Short=Al<br>pha-ETF;<br>Flags:<br>Precursor | gi 1108082<br>22,gi 11549<br>6196,gi 868<br>23828                                    | 34,944.00 | 99.80%  | 2 | 2 | 2 | 0.02% | 8.71%  | GLLPEEL 4.62<br>TPLLAT<br>QK              | 1,736.02 |
| Control | 6018 | RecName<br>:<br>Full=Elec<br>tron<br>transfer<br>flavoprot<br>ein<br>subunit<br>alpha,<br>mitochon<br>drial;<br>Short=Al<br>pha-ETF;<br>Flags:<br>Precursor | gi 1108082<br>22,gi 11549<br>6196,gi 868<br>23828                                    | 34,944.00 | 99.80%  | 2 | 2 | 2 | 0.02% | 8.71%  | LDVAPIS 2.66<br>DIIAIK                    | 1,367.81 |
| Control | 6018 | RecName<br>:<br>Full=Cyt<br>ochrome<br>b5                                                                                                                   | gi 117806,g<br>i 1372997,g<br>i 15783077<br>3,gi 278066<br>67,gi 298,gi<br> 79160196 | 15,311.60 | 100.00% | 2 | 2 | 3 | 0.03% | 24.60% | EQAGGD 3.3<br>ATENFE<br>DVGHST<br>DAR     | 2,205.93 |
| Control | 6018 | RecName<br>:<br>Full=Cyt<br>ochrome<br>b5                                                                                                                   | gi 117806,g<br>i 1372997,g<br>i 15783077<br>3,gi 278066<br>67,gi 298,gi<br> 79160196 | 15,311.60 | 100.00% | 2 | 2 | 3 | 0.03% | 24.60% | TFIIGEL 3.77<br>HPDDR                     | 1,412.72 |
| Control | 6018 | IKK<br>interactin<br>g protein                                                                                                                              | gi 1260106<br>33,gi 12616<br>5284,gi 193<br>806036                                   | 39,199.60 | 100.00% | 4 | 4 | 6 | 0.06% | 16.90% | LEPLVN 2.64<br>DLTLR                      | 1,282.74 |
| Control | 6018 | IKK<br>interactin<br>g protein                                                                                                                              | gi 1260106<br>33,gi 12616<br>5284,gi 193<br>806036                                   | 39,199.60 | 100.00% | 4 | 4 | 6 | 0.06% | 16.90% | METSEF 4.14<br>QGLQSK                     | 1,400.64 |
| Control | 6018 | IKK<br>interactin<br>g protein                                                                                                                              | gi 1260106<br>33,gi 12616<br>5284,gi 193<br>806036                                   | 39,199.60 | 100.00% | 4 | 4 | 6 | 0.06% | 16.90% | MSGLVT 3.27<br>DVTSLT<br>DSVQEL<br>ENKIEK | 2,652.33 |
| Control | 6018 | IKK<br>interactin<br>g protein                                                                                                                              | gi 1260106<br>33,gi 12616<br>5284,gi 193<br>806036                                   | 39,199.60 | 100.00% | 4 | 4 | 6 | 0.06% | 16.90% | NIGDLLS 3.79<br>SSIDR                     | 1,289.67 |
| Control | 6018 | ALDH3A<br>2 protein                                                                                                                                         | gi 1515570<br>95,gi 15612<br>0617                                                    | 54,059.30 | 100.00% | 4 | 4 | 4 | 0.04% | 10.30% | EKDILAA 2.51<br>IGADLSK                   | 1,443.81 |
| Control | 6018 | ALDH3A<br>2 protein                                                                                                                                         | gi 1515570<br>95,gi 15612<br>0617                                                    | 54,059.30 | 100.00% | 4 | 4 | 4 | 0.04% | 10.30% | HLTPVT 2.75<br>LELGK                      | 1,264.73 |

|         |      |                                                  |                                                             |            |         |   |   |   |       |        |                                   |      |          |
|---------|------|--------------------------------------------------|-------------------------------------------------------------|------------|---------|---|---|---|-------|--------|-----------------------------------|------|----------|
| Control | 6018 | ALDH3A2 protein                                  | gi 151557095,gi 156120617                                   | 54,059.30  | 100.00% | 4 | 4 | 4 | 0.04% | 10.30% | IAFGGE MDEATR                     | 2.98 | 1,312.58 |
| Control | 6018 | ALDH3A2 protein                                  | gi 151557095,gi 156120617                                   | 54,059.30  | 100.00% | 4 | 4 | 4 | 0.04% | 10.30% | NADEAI QFINER                     | 3.76 | 1,419.69 |
| Control | 6018 | defender against cell death 1                    | gi 59858361,gi 73918963,gi 74354770,gi 77736467,gi 83286811 | 12,477.50  | 99.80%  | 2 | 2 | 5 | 0.05% | 19.50% | ADFQGIS PER                       | 2.73 | 1,119.54 |
| Control | 6018 | defender against cell death 1                    | gi 59858361,gi 73918963,gi 74354770,gi 77736467,gi 83286811 | 12,477.50  | 99.80%  | 2 | 2 | 5 | 0.05% | 19.50% | FLEEYLS ATPQR                     | 3.42 | 1,453.73 |
| Control | 6018 | heterogeneous nuclear ribonucleoprotein A1       | gi 114052384,gi 172046785,gi 86823844                       | 34,178.40  | 99.80%  | 2 | 2 | 2 | 0.02% | 8.12%  | IEVIEIM TDR                       | 2.7  | 1,234.64 |
| Control | 6018 | heterogeneous nuclear ribonucleoprotein A1       | gi 114052384,gi 172046785,gi 86823844                       | 34,178.40  | 99.80%  | 2 | 2 | 2 | 0.02% | 8.12%  | SSGPYG GGGQYF AKPR                | 3.41 | 1,628.78 |
| Control | 6018 | Chain A, Adenylate Kinase Isoenzyme-2            | gi 157829916,gi 157834545,gi 224029                         | 16,091.20  | 99.80%  | 2 | 2 | 2 | 0.02% | 19.50% | APNVPA AEPVPES PK                 | 2.56 | 1,502.79 |
| Control | 6018 | Chain A, Adenylate Kinase Isoenzyme-2            | gi 157829916,gi 157834545,gi 224029                         | 16,091.20  | 99.80%  | 2 | 2 | 2 | 0.02% | 19.50% | APNVPA AEPVPES PKGVRA VLLGPP GAGK | 2.78 | 2,775.55 |
| Control | 6018 | PREDICTED: similar to optic atrophy 1 isoform 16 | gi 194663697                                                | 115,574.20 | 100.00% | 8 | 8 | 9 | 0.09% | 12.50% | DFFTTGS PGETAF R                  | 3.37 | 1,532.70 |
| Control | 6018 | PREDICTED: similar to optic atrophy 1 isoform 16 | gi 194663697                                                | 115,574.20 | 100.00% | 8 | 8 | 9 | 0.09% | 12.50% | EFDLTK EEDLAA LR                  | 3.26 | 1,649.84 |
| Control | 6018 | PREDICTED: similar to optic atrophy 1 isoform 16 | gi 194663697                                                | 115,574.20 | 100.00% | 8 | 8 | 9 | 0.09% | 12.50% | ESVEQQ ADSFK                      | 3.1  | 1,267.58 |
| Control | 6018 | PREDICTED: similar to optic atrophy 1 isoform 16 | gi 194663697                                                | 115,574.20 | 100.00% | 8 | 8 | 9 | 0.09% | 12.50% | EVLEDF AEDSEK                     | 3.08 | 1,410.63 |

|         |      |                                                     |                                                         |            |         |   |    |    |       |        |                                              |      |          |
|---------|------|-----------------------------------------------------|---------------------------------------------------------|------------|---------|---|----|----|-------|--------|----------------------------------------------|------|----------|
| Control | 6018 | PREDICTED:<br>similar to optic atrophy 1 isoform 16 | gi 1946636<br>97                                        | 115,574.20 | 100.00% | 8 | 8  | 9  | 0.09% | 12.50% | GNSSESI<br>EAIRDYE<br>EEFFQNS<br>K           | 4.84 | 2,579.15 |
| Control | 6018 | PREDICTED:<br>similar to optic atrophy 1 isoform 16 | gi 1946636<br>97                                        | 115,574.20 | 100.00% | 8 | 8  | 9  | 0.09% | 12.50% | IDQLQEE<br>LLHTQL<br>K                       | 3.41 | 1,707.93 |
| Control | 6018 | PREDICTED:<br>similar to optic atrophy 1 isoform 16 | gi 1946636<br>97                                        | 115,574.20 | 100.00% | 8 | 8  | 9  | 0.09% | 12.50% | MLAITA<br>NTRLR                              | 2.84 | 1,119.62 |
| Control | 6018 | PREDICTED:<br>similar to optic atrophy 1 isoform 16 | gi 1946636<br>97                                        | 115,574.20 | 100.00% | 8 | 8  | 9  | 0.09% | 12.50% | SLIDMYS<br>EVLVDL<br>SDYDAS<br>YNTQDH<br>LPR | 3.81 | 3,275.51 |
| Control | 6018 | Prostaglandin I2 (prostacyclin) synthase            | gi 1123623<br>85,gi 24933<br>72,gi 27806<br>107,gi 5385 | 56,613.60  | 100.00% | 7 | 10 | 13 | 0.13% | 20.00% | ELQALT<br>DAMYTN<br>LR                       | 4.37 | 1,654.81 |
| Control | 6018 | Prostaglandin I2 (prostacyclin) synthase            | gi 1123623<br>85,gi 24933<br>72,gi 27806<br>107,gi 5385 | 56,613.60  | 100.00% | 7 | 10 | 13 | 0.13% | 20.00% | EVVADL<br>ALPMAD<br>GR                       | 4.16 | 1,472.74 |
| Control | 6018 | Prostaglandin I2 (prostacyclin) synthase            | gi 1123623<br>85,gi 24933<br>72,gi 27806<br>107,gi 5385 | 56,613.60  | 100.00% | 7 | 10 | 13 | 0.13% | 20.00% | GELETV<br>LLGAEQ<br>PISQMTT<br>LPQK          | 3.44 | 2,483.31 |
| Control | 6018 | Prostaglandin I2 (prostacyclin) synthase            | gi 1123623<br>85,gi 24933<br>72,gi 27806<br>107,gi 5385 | 56,613.60  | 100.00% | 7 | 10 | 13 | 0.13% | 20.00% | LLLFPFL<br>SPQK                              | 2.75 | 1,302.78 |
| Control | 6018 | Prostaglandin I2 (prostacyclin) synthase            | gi 1123623<br>85,gi 24933<br>72,gi 27806<br>107,gi 5385 | 56,613.60  | 100.00% | 7 | 10 | 13 | 0.13% | 20.00% | LLLFPFL<br>SPQKDP<br>EIYTDPE<br>VFK          | 5.32 | 2,736.45 |
| Control | 6018 | Prostaglandin I2 (prostacyclin) synthase            | gi 1123623<br>85,gi 24933<br>72,gi 27806<br>107,gi 5385 | 56,613.60  | 100.00% | 7 | 10 | 13 | 0.13% | 20.00% | LTAAPFI<br>TR                                | 2.45 | 989.5779 |
| Control | 6018 | Prostaglandin I2 (prostacyclin) synthase            | gi 1123623<br>85,gi 24933<br>72,gi 27806<br>107,gi 5385 | 56,613.60  | 100.00% | 7 | 10 | 13 | 0.13% | 20.00% | VLDSMP<br>VLDSVL<br>SESLR                    | 4.8  | 1,875.97 |

|         |      |                                                                |                                       |           |         |   |   |   |       |        |                                           |          |
|---------|------|----------------------------------------------------------------|---------------------------------------|-----------|---------|---|---|---|-------|--------|-------------------------------------------|----------|
| Control | 6018 | PREDIC TED: heterogenous nuclear ribonucleoprotein M isoform 2 | gi 119894863                          | 77,466.20 | 100.00% | 4 | 4 | 4 | 0.04% | 8.77%  | AFITNIPF DVK 2.61                         | 1,264.69 |
| Control | 6018 | PREDIC TED: heterogenous nuclear ribonucleoprotein M isoform 2 | gi 119894863                          | 77,466.20 | 100.00% | 4 | 4 | 4 | 0.04% | 8.77%  | GNFGGS FAGSFG GAGGHA PGVAR 2.63           | 2,034.95 |
| Control | 6018 | PREDIC TED: heterogenous nuclear ribonucleoprotein M isoform 2 | gi 119894863                          | 77,466.20 | 100.00% | 4 | 4 | 4 | 0.04% | 8.77%  | INEILSN ALK 2.71                          | 1,114.65 |
| Control | 6018 | PREDIC TED: heterogenous nuclear ribonucleoprotein M isoform 2 | gi 119894863                          | 77,466.20 | 100.00% | 4 | 4 | 4 | 0.04% | 8.77%  | MEEESG APGVPS GNGAPG PK 2.59              | 1,883.84 |
| Control | 6018 | tubulin, beta                                                  | gi 114052731,gi 146231774,gi 86823832 | 49,652.60 | 100.00% | 3 | 4 | 7 | 0.07% | 45.70% | AILVDLE PGTMDS VR 4.42                    | 1,631.83 |
| Control | 6018 | tubulin, beta                                                  | gi 114052731,gi 146231774,gi 86823832 | 49,652.60 | 100.00% | 3 | 4 | 7 | 0.07% | 45.70% | ALTVPE LTQQVF DAK 3.93                    | 1,659.90 |
| Control | 6018 | tubulin, beta                                                  | gi 114052731,gi 146231774,gi 86823832 | 49,652.60 | 100.00% | 3 | 4 | 7 | 0.07% | 45.70% | EAESCD CLQGFQ LTHSLG GGTGSG MGTLIS K 3.11 | 3,213.49 |
| Control | 6018 | tubulin, beta                                                  | gi 114052731,gi 146231774,gi 86823832 | 49,652.60 | 100.00% | 3 | 4 | 7 | 0.07% | 45.70% | EVDEQM LNVQNK 2.76                        | 1,462.68 |
| Control | 6018 | tubulin, beta                                                  | gi 114052731,gi 146231774,gi 86823832 | 49,652.60 | 100.00% | 3 | 4 | 7 | 0.07% | 45.70% | GHYTEG AELVDS VLDVVR 4.4                  | 1,958.98 |
| Control | 6018 | tubulin, beta                                                  | gi 114052731,gi 146231774,gi 86823832 | 49,652.60 | 100.00% | 3 | 4 | 7 | 0.07% | 45.70% | GHYTEG AELVDS VLDVVR K 3.51               | 2,087.08 |
| Control | 6018 | tubulin, beta                                                  | gi 114052731,gi 146231774,gi 86823832 | 49,652.60 | 100.00% | 3 | 4 | 7 | 0.07% | 45.70% | IMNTFSV VSPK 4.35                         | 1,335.70 |
| Control | 6018 | tubulin, beta                                                  | gi 114052731,gi 146231774,gi 86823832 | 49,652.60 | 100.00% | 3 | 4 | 7 | 0.07% | 45.70% | ISVYYNE ATGGK 3.22                        | 1,301.64 |

|         |      |                                                                                                                                      |                                       |           |         |   |   |   |       |        |                                                                     |          |
|---------|------|--------------------------------------------------------------------------------------------------------------------------------------|---------------------------------------|-----------|---------|---|---|---|-------|--------|---------------------------------------------------------------------|----------|
| Control | 6018 | tubulin, beta                                                                                                                        | gi 114052731,gi 146231774,gi 86823832 | 49,652.60 | 100.00% | 3 | 4 | 7 | 0.07% | 45.70% | LAVNMV 3.83<br>PFPR                                                 | 1,159.63 |
| Control | 6018 | tubulin, beta                                                                                                                        | gi 114052731,gi 146231774,gi 86823832 | 49,652.60 | 100.00% | 3 | 4 | 7 | 0.07% | 45.70% | LHFFMP 4.05<br>GFAPLTS<br>R                                         | 1,636.83 |
| Control | 6018 | tubulin, beta                                                                                                                        | gi 114052731,gi 146231774,gi 86823832 | 49,652.60 | 100.00% | 3 | 4 | 7 | 0.07% | 45.70% | NSSYFV 2.39<br>EWIPNN<br>VK                                         | 1,696.83 |
| Control | 6018 | tubulin, beta                                                                                                                        | gi 114052731,gi 146231774,gi 86823832 | 49,652.60 | 100.00% | 3 | 4 | 7 | 0.07% | 45.70% | VSDTVV 4.6<br>EPYNAT<br>LSVHQL<br>VENTDE<br>TYCIDNE<br>ALYDICF<br>R | 4,479.06 |
| Control | 6018 | tubulin, beta                                                                                                                        | gi 114052731,gi 146231774,gi 86823832 | 49,652.60 | 100.00% | 3 | 4 | 7 | 0.07% | 45.70% | YLTVAA 2.73<br>VFR                                                  | 1,039.59 |
| Control | 6018 | melanom a cell adhesion molecul                                                                                                      | gi 2323281                            | 9,468.30  | 99.80%  | 2 | 4 | 7 | 0.07% | 22.10% | SDKLPEE 4.73<br>MGLLQG<br>SSGDK                                     | 1,906.91 |
| Control | 6018 | melanom a cell adhesion molecul                                                                                                      | gi 2323281                            | 9,468.30  | 99.80%  | 2 | 4 | 7 | 0.07% | 22.10% | SDKLPEE 3.45<br>MGLLQG<br>SSGDKR                                    | 2,063.01 |
| Control | 6018 | RecName : Full=Orni thine aminotra nsferase, mitochon drial; AltName: Full=Orni thine-- oxo-acid aminotra nsferase; Flags: Precursor | gi 122140925,gi 73586966,gi 77735431  | 48,058.30 | 99.90%  | 2 | 2 | 2 | 0.02% | 5.24%  | GLLNAIV 2.86<br>IR                                                  | 968.6252 |
| Control | 6018 | RecName : Full=Orni thine aminotra nsferase, mitochon drial; AltName: Full=Orni thine-- oxo-acid aminotra nsferase; Flags: Precursor | gi 122140925,gi 73586966,gi 77735431  | 48,058.30 | 99.90%  | 2 | 2 | 2 | 0.02% | 5.24%  | TVQGPP 3.72<br>SSDYIFE<br>R                                         | 1,595.77 |

|         |      |                                                              |                                                                                                  |           |         |   |   |    |       |        |                             |      |          |
|---------|------|--------------------------------------------------------------|--------------------------------------------------------------------------------------------------|-----------|---------|---|---|----|-------|--------|-----------------------------|------|----------|
| Control | 6018 | RecName<br>:<br>Full=Tra<br>nsmembr<br>ane<br>protein<br>111 | gi 1153118<br>72,gi 73587<br>331,gi 7805                                                         | 29,903.00 | 100.00% | 2 | 2 | 2  | 0.02% | 11.90% | LTQEQV<br>SDSQVLI<br>R      | 3.81 | 1,615.87 |
| Control | 6018 | RecName<br>:<br>Full=Tra<br>nsmembr<br>ane<br>protein<br>111 | gi 1153118<br>72,gi 73587<br>331,gi 7805                                                         | 29,903.00 | 100.00% | 2 | 2 | 2  | 0.02% | 11.90% | SIYSLILG<br>QDNAAD<br>QSR   | 3.06 | 1,850.92 |
| Control | 6018 | Hemoglo<br>bin,<br>gamma 2                                   | gi 1584550<br>08,gi 16033<br>3301,gi 393<br>,gi 6246049<br>4                                     | 15,841.20 | 99.80%  | 2 | 2 | 93 | 0.91% | 17.20% | LLGNVL<br>VVVLAR            | 4.41 | 1,265.83 |
| Control | 6018 | Hemoglo<br>bin,<br>gamma 2                                   | gi 1584550<br>08,gi 16033<br>3301,gi 393<br>,gi 6246049<br>4                                     | 15,841.20 | 99.80%  | 2 | 2 | 93 | 0.91% | 17.20% | VKVDEV<br>GGEALG<br>R       | 4.31 | 1,328.72 |
| Control | 6018 | vesicle-<br>associate<br>d<br>membran<br>e protein<br>5      | gi 1140507<br>17,gi 12213<br>5927,gi 868<br>26577                                                | 12,760.30 | 99.80%  | 2 | 2 | 4  | 0.04% | 24.10% | QADEV<br>T<br>EIMLNN<br>FDK | 3.19 | 1,782.82 |
| Control | 6018 | vesicle-<br>associate<br>d<br>membran<br>e protein<br>5      | gi 1140507<br>17,gi 12213<br>5927,gi 868<br>26577                                                | 12,760.30 | 99.80%  | 2 | 2 | 4  | 0.04% | 24.10% | SDQLLD<br>MSSAFS<br>K       | 4.29 | 1,444.66 |
| Control | 6018 | Ribosom<br>al protein<br>L6                                  | gi 1267173<br>93,gi 58760<br>432,gi 6155<br>3343,gi 615<br>53350,gi 67<br>461090,gi 7<br>2534798 | 32,672.90 | 100.00% | 4 | 4 | 4  | 0.04% | 19.20% | ASITPGT<br>ILILTGR          | 3.34 | 1,525.93 |
| Control | 6018 | Ribosom<br>al protein<br>L6                                  | gi 1267173<br>93,gi 58760<br>432,gi 6155<br>3343,gi 615<br>53350,gi 67<br>461090,gi 7<br>2534798 | 32,672.90 | 100.00% | 4 | 4 | 4  | 0.04% | 19.20% | AVPQLQ<br>GYLR              | 2.85 | 1,144.65 |
| Control | 6018 | Ribosom<br>al protein<br>L6                                  | gi 1267173<br>93,gi 58760<br>432,gi 6155<br>3343,gi 615<br>53350,gi 67<br>461090,gi 7<br>2534798 | 32,672.90 | 100.00% | 4 | 4 | 4  | 0.04% | 19.20% | QLGSGL<br>LLVTGP<br>LSLNR   | 4.3  | 1,738.02 |
| Control | 6018 | Ribosom<br>al protein<br>L6                                  | gi 1267173<br>93,gi 58760<br>432,gi 6155<br>3343,gi 615<br>53350,gi 67<br>461090,gi 7<br>2534798 | 32,672.90 | 100.00% | 4 | 4 | 4  | 0.04% | 19.20% | SVFALT<br>NGIYPH<br>K       | 2.92 | 1,446.77 |

|         |      |                                                                               |                  |            |         |    |    |    |       |       |                                      |      |          |
|---------|------|-------------------------------------------------------------------------------|------------------|------------|---------|----|----|----|-------|-------|--------------------------------------|------|----------|
| Control | 6018 | PREDIC<br>TED:<br>filamin<br>A, alpha<br>(actin<br>binding<br>protein<br>280) | gi 1946802<br>54 | 276,424.10 | 100.00% | 10 | 11 | 13 | 0.13% | 6.80% | AFGPGL<br>QGSAG<br>SPAR              | 4.18 | 1,429.72 |
| Control | 6018 | PREDIC<br>TED:<br>filamin<br>A, alpha<br>(actin<br>binding<br>protein<br>280) | gi 1946802<br>54 | 276,424.10 | 100.00% | 10 | 11 | 13 | 0.13% | 6.80% | ANLPQS<br>FQVDT<br>K                 | 3.53 | 1,434.72 |
| Control | 6018 | PREDIC<br>TED:<br>filamin<br>A, alpha<br>(actin<br>binding<br>protein<br>280) | gi 1946802<br>54 | 276,424.10 | 100.00% | 10 | 11 | 13 | 0.13% | 6.80% | AYGPGIE<br>PTGNM<br>K                | 3.22 | 1,449.70 |
| Control | 6018 | PREDIC<br>TED:<br>filamin<br>A, alpha<br>(actin<br>binding<br>protein<br>280) | gi 1946802<br>54 | 276,424.10 | 100.00% | 10 | 11 | 13 | 0.13% | 6.80% | DVDIIDH<br>HDNTYT<br>VK              | 2.89 | 1,784.85 |
| Control | 6018 | PREDIC<br>TED:<br>filamin<br>A, alpha<br>(actin<br>binding<br>protein<br>280) | gi 1946802<br>54 | 276,424.10 | 100.00% | 10 | 11 | 13 | 0.13% | 6.80% | FADQHV<br>PGSPFSV<br>K               | 2.69 | 1,515.76 |
| Control | 6018 | PREDIC<br>TED:<br>filamin<br>A, alpha<br>(actin<br>binding<br>protein<br>280) | gi 1946802<br>54 | 276,424.10 | 100.00% | 10 | 11 | 13 | 0.13% | 6.80% | GAGTGG<br>LGLAVE<br>GPSEAK           | 3.98 | 1,570.81 |
| Control | 6018 | PREDIC<br>TED:<br>filamin<br>A, alpha<br>(actin<br>binding<br>protein<br>280) | gi 1946802<br>54 | 276,424.10 | 100.00% | 10 | 11 | 13 | 0.13% | 6.80% | GLVEPV<br>DVVDNA<br>DGTQTV<br>NYVPSR | 2.69 | 2,544.26 |
| Control | 6018 | PREDIC<br>TED:<br>filamin<br>A, alpha<br>(actin<br>binding<br>protein<br>280) | gi 1946802<br>54 | 276,424.10 | 100.00% | 10 | 11 | 13 | 0.13% | 6.80% | IANLQT<br>DLSGGL<br>R                | 3.27 | 1,415.75 |



|         |      |                                                            |                                       |            |         |    |    |    |       |        |                                             |          |
|---------|------|------------------------------------------------------------|---------------------------------------|------------|---------|----|----|----|-------|--------|---------------------------------------------|----------|
| Control | 6018 | PREDICTED:<br>filamin A, alpha (actin binding protein 280) | gi 194680254                          | 276,424.10 | 100.00% | 10 | 11 | 13 | 0.13% | 6.80%  | LIALLEV 2.97<br>LSQK                        | 1,226.77 |
| Control | 6018 | PREDICTED:<br>filamin A, alpha (actin binding protein 280) | gi 194680254                          | 276,424.10 | 100.00% | 10 | 11 | 13 | 0.13% | 6.80%  | VTAQGP 4.51<br>GLEPSG<br>NIANK              | 1,652.86 |
| Control | 6018 | PREDICTED:<br>filamin A, alpha (actin binding protein 280) | gi 194680254                          | 276,424.10 | 100.00% | 10 | 11 | 13 | 0.13% | 6.80%  | YTPVQQ 4.39<br>GPVGIN<br>VTYGGD<br>AIPK     | 2,274.18 |
| Control | 6018 | NRAS protein                                               | gi 146186548,gi 148226664             | 21,211.30  | 99.90%  | 2  | 2  | 2  | 0.02% | 18.50% | SALTIQL 2.94<br>IQNHFV<br>DEYDPTI<br>EDSYRK | 3,095.53 |
| Control | 6018 | NRAS protein                                               | gi 146186548,gi 148226664             | 21,211.30  | 99.90%  | 2  | 2  | 2  | 0.02% | 18.50% | SFADINL 2.69<br>YR                          | 1,098.56 |
| Control | 6018 | synaptosomal-associated protein 23                         | gi 115496868,gi 152941114,gi 83405332 | 23,209.50  | 100.00% | 7  | 9  | 16 | 0.16% | 41.20% | ANQVTD 3.93<br>ESLESTR                      | 1,449.68 |
| Control | 6018 | synaptosomal-associated protein 23                         | gi 115496868,gi 152941114,gi 83405332 | 23,209.50  | 100.00% | 7  | 9  | 16 | 0.16% | 41.20% | ANQVTD 3.14<br>ESLESTR<br>R                 | 1,605.78 |
| Control | 6018 | synaptosomal-associated protein 23                         | gi 115496868,gi 152941114,gi 83405332 | 23,209.50  | 100.00% | 7  | 9  | 16 | 0.16% | 41.20% | ILGLAIE 4.45<br>SQDAGI<br>K                 | 1,427.81 |
| Control | 6018 | synaptosomal-associated protein 23                         | gi 115496868,gi 152941114,gi 83405332 | 23,209.50  | 100.00% | 7  | 9  | 16 | 0.16% | 41.20% | ITNDARE 2.98<br>DEMEDN<br>LTQVGSI<br>LGNLK  | 2,791.34 |
| Control | 6018 | synaptosomal-associated protein 23                         | gi 115496868,gi 152941114,gi 83405332 | 23,209.50  | 100.00% | 7  | 9  | 16 | 0.16% | 41.20% | TITMLDE 3.83<br>QGEQLK                      | 1,521.75 |
| Control | 6018 | synaptosomal-associated protein 23                         | gi 115496868,gi 152941114,gi 83405332 | 23,209.50  | 100.00% | 7  | 9  | 16 | 0.16% | 41.20% | TITMLDE 2.37<br>QGEQLK<br>R                 | 1,677.85 |
| Control | 6018 | synaptosomal-associated protein 23                         | gi 115496868,gi 152941114,gi 83405332 | 23,209.50  | 100.00% | 7  | 9  | 16 | 0.16% | 41.20% | VTNGQP 4.65<br>QQATAG<br>AASGGY<br>IK       | 1,918.96 |

|         |      |                                                                              |                                        |           |         |   |   |    |       |       |                                      |      |          |
|---------|------|------------------------------------------------------------------------------|----------------------------------------|-----------|---------|---|---|----|-------|-------|--------------------------------------|------|----------|
| Control | 6018 | LBR protein                                                                  | gi 151557087,gi 154152031              | 71,240.40 | 99.80%  | 2 | 3 | 3  | 0.03% | 6.28% | APQDEL<br>SPASSG<br>NAIYDFF<br>IGR   | 4.97 | 2,355.13 |
| Control | 6018 | LBR protein                                                                  | gi 151557087,gi 154152031              | 71,240.40 | 99.80%  | 2 | 3 | 3  | 0.03% | 6.28% | FHLSQES<br>SYIPTQY<br>SLR            | 2.91 | 2,056.01 |
| Control | 6018 | Solute carrier family 1 (glutamate/neutral amino acid transporter), member 4 | gi 124828540,gi 126158903,gi 145566947 | 55,991.00 | 100.00% | 3 | 3 | 3  | 0.03% | 9.25% | ETVDSFL<br>DLTR                      | 2.87 | 1,295.65 |
| Control | 6018 | Solute carrier family 1 (glutamate/neutral amino acid transporter), member 4 | gi 124828540,gi 126158903,gi 145566947 | 55,991.00 | 100.00% | 3 | 3 | 3  | 0.03% | 9.25% | NLFPSNL<br>VVAAFR                    | 2.81 | 1,447.81 |
| Control | 6018 | Solute carrier family 1 (glutamate/neutral amino acid transporter), member 4 | gi 124828540,gi 126158903,gi 145566947 | 55,991.00 | 100.00% | 3 | 3 | 3  | 0.03% | 9.25% | SEETSP<br>LVTHPN<br>PTGPAA<br>STPESK | 3.45 | 2,563.22 |
| Control | 6018 | PREDICTED: ubiquitin C isoform 12                                            | gi 76638716                            | 77,556.00 | 100.00% | 3 | 6 | 24 | 0.23% | 5.51% | ESTLHL<br>VLR                        | 1.66 | 1,067.62 |
| Control | 6018 | PREDICTED: ubiquitin C isoform 12                                            | gi 76638716                            | 77,556.00 | 100.00% | 3 | 6 | 24 | 0.23% | 5.51% | IQDKEGI<br>PPDQQR                    | 3.95 | 1,523.78 |
| Control | 6018 | PREDICTED: ubiquitin C isoform 12                                            | gi 76638716                            | 77,556.00 | 100.00% | 3 | 6 | 24 | 0.23% | 5.51% | TITLEVE<br>PSDTIEN<br>VK             | 4.2  | 1,787.93 |
| Control | 6018 | TPA: predicted NADPH oxidase-5                                               | gi 151427572,gi 155372001              | 86,454.40 | 99.80%  | 2 | 3 | 5  | 0.05% | 3.71% | AIGLQM<br>ALDLLA<br>K                | 3.79 | 1,372.79 |
| Control | 6018 | TPA: predicted NADPH oxidase-5                                               | gi 151427572,gi 155372001              | 86,454.40 | 99.80%  | 2 | 3 | 5  | 0.05% | 3.71% | MAALHI<br>VEVNLL<br>PSK              | 4.58 | 1,650.92 |

|         |      |                                                                                                                                                   |                                                  |            |         |    |    |    |       |        |                                     |      |          |
|---------|------|---------------------------------------------------------------------------------------------------------------------------------------------------|--------------------------------------------------|------------|---------|----|----|----|-------|--------|-------------------------------------|------|----------|
| Control | 6018 | RecName<br>:<br>Full=Sma<br>ll nuclear<br>ribonucle<br>oprotein<br>Sm D1;<br>Short=S<br>m-D1;<br>AltName:<br>Full=snR<br>NP core<br>protein<br>D1 | gi 1098948<br>69,gi 73586<br>929,gi 7805<br>0059 | 13,263.90  | 99.80%  | 2  | 4  | 6  | 0.06% | 27.70% | NREPVQ<br>LETLSIR                   | 3.6  | 1,554.86 |
| Control | 6018 | RecName<br>:<br>Full=Sma<br>ll nuclear<br>ribonucle<br>oprotein<br>Sm D1;<br>Short=S<br>m-D1;<br>AltName:<br>Full=snR<br>NP core<br>protein<br>D1 | gi 1098948<br>69,gi 73586<br>929,gi 7805<br>0059 | 13,263.90  | 99.80%  | 2  | 4  | 6  | 0.06% | 27.70% | YFILPDS<br>LPLDTLL<br>VDVEPK        | 4.71 | 2,287.25 |
| Control | 6018 | PREDIC<br>TED:<br>ATPase,<br>Ca++<br>transporti<br>ng,<br>cardiac<br>muscle,<br>slow<br>twitch 2<br>isoform 1                                     | gi 7663901<br>9                                  | 109,762.30 | 100.00% | 13 | 15 | 23 | 0.22% | 16.10% | AKDIVP<br>GDIVEIA<br>VGDKVP<br>ADIR | 3.1  | 2,390.33 |
| Control | 6018 | PREDIC<br>TED:<br>ATPase,<br>Ca++<br>transporti<br>ng,<br>cardiac<br>muscle,<br>slow<br>twitch 2<br>isoform 1                                     | gi 7663901<br>9                                  | 109,762.30 | 100.00% | 13 | 15 | 23 | 0.22% | 16.10% | DIVPGDI<br>VEIAVG<br>DKVPAD<br>IR   | 3.52 | 2,191.20 |
| Control | 6018 | PREDIC<br>TED:<br>ATPase,<br>Ca++<br>transporti<br>ng,<br>cardiac<br>muscle,<br>slow<br>twitch 2<br>isoform 1                                     | gi 7663901<br>9                                  | 109,762.30 | 100.00% | 13 | 15 | 23 | 0.22% | 16.10% | EEMNLE<br>DSANFIK                   | 3.13 | 1,555.69 |

|         |      |                                                                               |              |            |         |    |    |    |       |        |                    |      |          |
|---------|------|-------------------------------------------------------------------------------|--------------|------------|---------|----|----|----|-------|--------|--------------------|------|----------|
| Control | 6018 | PREDICTED: ATPase, Ca++ transporting, cardiac muscle, slow twitch 2 isoform 1 | gi 7663901.9 | 109,762.30 | 100.00% | 13 | 15 | 23 | 0.22% | 16.10% | EFTLEFSR           | 1.9  | 1,028.50 |
| Control | 6018 | PREDICTED: ATPase, Ca++ transporting, cardiac muscle, slow twitch 2 isoform 1 | gi 7663901.9 | 109,762.30 | 100.00% | 13 | 15 | 23 | 0.22% | 16.10% | ISLPVILMDETLK      | 3.17 | 1,487.84 |
| Control | 6018 | PREDICTED: ATPase, Ca++ transporting, cardiac muscle, slow twitch 2 isoform 1 | gi 7663901.9 | 109,762.30 | 100.00% | 13 | 15 | 23 | 0.22% | 16.10% | KSEIGIAMSGTAVAK    | 4.68 | 1,535.81 |
| Control | 6018 | PREDICTED: ATPase, Ca++ transporting, cardiac muscle, slow twitch 2 isoform 1 | gi 7663901.9 | 109,762.30 | 100.00% | 13 | 15 | 23 | 0.22% | 16.10% | LDEFGEQLSK         | 3.07 | 1,165.57 |
| Control | 6018 | PREDICTED: ATPase, Ca++ transporting, cardiac muscle, slow twitch 2 isoform 1 | gi 7663901.9 | 109,762.30 | 100.00% | 13 | 15 | 23 | 0.22% | 16.10% | MNVFDTLKLK         | 2.92 | 1,112.53 |
| Control | 6018 | PREDICTED: ATPase, Ca++ transporting, cardiac muscle, slow twitch 2 isoform 1 | gi 7663901.9 | 109,762.30 | 100.00% | 13 | 15 | 23 | 0.22% | 16.10% | NAENAIEALKEYEPEMGK | 3.46 | 2,051.96 |

|         |      |                                                                                                                |            |            |         |    |    |    |       |        |                                         |      |          |
|---------|------|----------------------------------------------------------------------------------------------------------------|------------|------------|---------|----|----|----|-------|--------|-----------------------------------------|------|----------|
| Control | 6018 | PREDICTED: ATPase, Ca++ transporting, cardiac muscle, slow twitch 2 isoform 1                                  | gi 7663901 | 109,762.30 | 100.00% | 13 | 15 | 23 | 0.22% | 16.10% | NMLFSG<br>TNIAAG<br>K                   | 3.99 | 1,339.67 |
| Control | 6018 | PREDICTED: ATPase, Ca++ transporting, cardiac muscle, slow twitch 2 isoform 1                                  | gi 7663901 | 109,762.30 | 100.00% | 13 | 15 | 23 | 0.22% | 16.10% | SEIGIAM<br>GSGTAV<br>AK                 | 5.1  | 1,407.72 |
| Control | 6018 | PREDICTED: ATPase, Ca++ transporting, cardiac muscle, slow twitch 2 isoform 1                                  | gi 7663901 | 109,762.30 | 100.00% | 13 | 15 | 23 | 0.22% | 16.10% | TASEMV<br>LADDNF<br>STIVA<br>AV<br>EEGR | 4.32 | 2,441.15 |
| Control | 6018 | PREDICTED: ATPase, Ca++ transporting, cardiac muscle, slow twitch 2 isoform 1                                  | gi 7663901 | 109,762.30 | 100.00% | 13 | 15 | 23 | 0.22% | 16.10% | VDQSILT<br>GESVSVI<br>K                 | 4.46 | 1,574.86 |
| Control | 6018 | PREDICTED: similar to solute carrier family 7 (cationic amino acid transporter, y+ system), member 2 isoform 2 | gi 1946791 | 71,681.50  | 100.00% | 4  | 6  | 6  | 0.06% | 7.75%  | DEEDDD<br>EDMYSD<br>NINAAT<br>EEK       | 5.77 | 2,463.91 |

|         |      |                                                                                                                |                                                                 |            |         |   |   |   |       |       |                                                          |      |          |
|---------|------|----------------------------------------------------------------------------------------------------------------|-----------------------------------------------------------------|------------|---------|---|---|---|-------|-------|----------------------------------------------------------|------|----------|
| Control | 6018 | PREDICTED: similar to solute carrier family 7 (cationic amino acid transporter, y+ system), member 2 isoform 2 | gi 1946791                                                      | 71,681.50  | 100.00% | 4 | 6 | 6 | 0.06% | 7.75% | HSLEGN<br>PRDEED<br>DDEDMY<br>SDNINA<br>ATEEK            | 6.42 | 3,354.35 |
| Control | 6018 | PREDICTED: similar to solute carrier family 7 (cationic amino acid transporter, y+ system), member 2 isoform 2 | gi 1946791                                                      | 71,681.50  | 100.00% | 4 | 6 | 6 | 0.06% | 7.75% | IVTLDSL<br>EDTK                                          | 2.58 | 1,233.66 |
| Control | 6018 | PREDICTED: similar to solute carrier family 7 (cationic amino acid transporter, y+ system), member 2 isoform 2 | gi 1946791                                                      | 71,681.50  | 100.00% | 4 | 6 | 6 | 0.06% | 7.75% | NLSLPFI<br>FHEK                                          | 2.61 | 1,344.73 |
| Control | 6018 | ENDOD 1 protein                                                                                                | gi 1544255<br>75,gi 15652<br>3150                               | 54,851.30  | 100.00% | 4 | 4 | 5 | 0.05% | 9.80% | FATLYST<br>QHR                                           | 3.2  | 1,223.62 |
| Control | 6018 | ENDOD 1 protein                                                                                                | gi 1544255<br>75,gi 15652<br>3150                               | 54,851.30  | 100.00% | 4 | 4 | 5 | 0.05% | 9.80% | FFYAGT<br>PPAGPA<br>AAAHVR                               | 2.11 | 1,800.92 |
| Control | 6018 | ENDOD 1 protein                                                                                                | gi 1544255<br>75,gi 15652<br>3150                               | 54,851.30  | 100.00% | 4 | 4 | 5 | 0.05% | 9.80% | ILEVVN<br>QVQDEE<br>R                                    | 4.32 | 1,570.81 |
| Control | 6018 | ENDOD 1 protein                                                                                                | gi 1544255<br>75,gi 15652<br>3150                               | 54,851.30  | 100.00% | 4 | 4 | 5 | 0.05% | 9.80% | IPVYSAF<br>R                                             | 2.23 | 952.525  |
| Control | 6018 | 100 kDa coactivator                                                                                            | gi 3052326<br>2,gi 454299<br>77,gi 60415<br>927,gi 7551<br>7981 | 101,972.50 | 99.80%  | 2 | 2 | 2 | 0.02% | 5.71% | DVQIILE<br>SCHNQN<br>ILGTILH<br>PNGNITE<br>LLLKEGF<br>AR | 3.16 | 4,013.13 |
| Control | 6018 | 100 kDa coactivator                                                                                            | gi 3052326<br>2,gi 454299<br>77,gi 60415<br>927,gi 7551<br>7981 | 101,972.50 | 99.80%  | 2 | 2 | 2 | 0.02% | 5.71% | EADGSE<br>TPEPFAA<br>EAK                                 | 3.76 | 1,648.73 |

|         |      |                                                                  |                                                  |           |         |   |   |   |       |        |                            |      |          |
|---------|------|------------------------------------------------------------------|--------------------------------------------------|-----------|---------|---|---|---|-------|--------|----------------------------|------|----------|
| Control | 6018 | PREDIC TED: 4<br>similar to karyopherin beta 1 isoform 2         | gi 7664462                                       | 97,210.30 | 100.00% | 3 | 3 | 3 | 0.03% | 5.25%  | AAVENL<br>PTFLVEL<br>SR    | 4.26 | 1,658.91 |
| Control | 6018 | PREDIC TED: 4<br>similar to karyopherin beta 1 isoform 2         | gi 7664462                                       | 97,210.30 | 100.00% | 3 | 3 | 3 | 0.03% | 5.25%  | LAATNA<br>LLNSLEF<br>TK    | 4.12 | 1,605.88 |
| Control | 6018 | PREDIC TED: 4<br>similar to karyopherin beta 1 isoform 2         | gi 7664462                                       | 97,210.30 | 100.00% | 3 | 3 | 3 | 0.03% | 5.25%  | LLETTD<br>RPDGHQ<br>NNLR   | 1.63 | 1,878.94 |
| Control | 6018 | PREDIC TED: 65<br>similar to coiled-coil domain containin g 109A | gi 1199185                                       | 39,876.70 | 100.00% | 4 | 5 | 5 | 0.05% | 12.80% | DRQYLL<br>FFHK             | 3.51 | 1,366.73 |
| Control | 6018 | PREDIC TED: 65<br>similar to coiled-coil domain containin g 109A | gi 1199185                                       | 39,876.70 | 100.00% | 4 | 5 | 5 | 0.05% | 12.80% | LEDLKE<br>QLAPLE<br>K      | 4.57 | 1,525.85 |
| Control | 6018 | PREDIC TED: 65<br>similar to coiled-coil domain containin g 109A | gi 1199185                                       | 39,876.70 | 100.00% | 4 | 5 | 5 | 0.05% | 12.80% | LRDPLQ<br>VHLPLR           | 3.48 | 1,456.87 |
| Control | 6018 | PREDIC TED: 65<br>similar to coiled-coil domain containin g 109A | gi 1199185                                       | 39,876.70 | 100.00% | 4 | 5 | 5 | 0.05% | 12.80% | VAIYSPD<br>GVR             | 2.57 | 1,076.57 |
| Control | 6018 | sorting and assembly machiner y compone nt 50 homolog            | gi 1140510<br>51.gi 87578<br>317.gi 9576<br>9210 | 52,025.30 | 99.90%  | 2 | 2 | 3 | 0.03% | 5.33%  | ETSYGL<br>SFFKPQP<br>GNFDR | 3.58 | 2,090.00 |
| Control | 6018 | sorting and assembly machiner y compone nt 50 homolog            | gi 1140510<br>51.gi 87578<br>317.gi 9576<br>9210 | 52,025.30 | 99.90%  | 2 | 2 | 3 | 0.03% | 5.33%  | LPNLLG<br>R                | 1.98 | 782.4884 |

|         |      |                                                |                                                      |            |         |   |   |   |       |        |                           |      |          |
|---------|------|------------------------------------------------|------------------------------------------------------|------------|---------|---|---|---|-------|--------|---------------------------|------|----------|
| Control | 6018 | PREDICTED:<br>similar to ephrin receptor EphA2 | gi 1198889:53                                        | 107,900.50 | 100.00% | 6 | 6 | 6 | 0.06% | 7.79%  | FADIVSI LDK               | 3.39 | 1,120.63 |
| Control | 6018 | PREDICTED:<br>similar to ephrin receptor EphA2 | gi 1198889:53                                        | 107,900.50 | 100.00% | 6 | 6 | 6 | 0.06% | 7.79%  | IAYSLLG LK                | 2.14 | 977.6031 |
| Control | 6018 | PREDICTED:<br>similar to ephrin receptor EphA2 | gi 1198889:53                                        | 107,900.50 | 100.00% | 6 | 6 | 6 | 0.06% | 7.79%  | IDTIAPD EITGSSD FEAR      | 3.85 | 1,936.91 |
| Control | 6018 | PREDICTED:<br>similar to ephrin receptor EphA2 | gi 1198889:53                                        | 107,900.50 | 100.00% | 6 | 6 | 6 | 0.06% | 7.79%  | TYVDPH TYEDPN QAVLK       | 2.57 | 1,989.96 |
| Control | 6018 | PREDICTED:<br>similar to ephrin receptor EphA2 | gi 1198889:53                                        | 107,900.50 | 100.00% | 6 | 6 | 6 | 0.06% | 7.79%  | VIGAGEF GEVYK             | 3.19 | 1,268.65 |
| Control | 6018 | PREDICTED:<br>similar to ephrin receptor EphA2 | gi 1198889:53                                        | 107,900.50 | 100.00% | 6 | 6 | 6 | 0.06% | 7.79%  | YSEPPLG LTR               | 2.45 | 1,132.60 |
| Control | 6018 | Progesterone receptor membrane component 1     | gi 1096593:85,gi 11549:5221,gi 116:248575,gi 7689365 | 21,605.30  | 100.00% | 4 | 5 | 9 | 0.09% | 19.10% | FYGPEG PYGVFA GR          | 3.46 | 1,516.72 |
| Control | 6018 | Progesterone receptor membrane component 1     | gi 1096593:85,gi 11549:5221,gi 116:248575,gi 7689365 | 21,605.30  | 100.00% | 4 | 5 | 9 | 0.09% | 19.10% | GDQPAA SDSDDD EPPPLPR     | 3.89 | 1,978.86 |
| Control | 6018 | Progesterone receptor membrane component 1     | gi 1096593:85,gi 11549:5221,gi 116:248575,gi 7689365 | 21,605.30  | 100.00% | 4 | 5 | 9 | 0.09% | 19.10% | IVRGDQ PAASDS DDDEPP PLPR | 5.6  | 2,347.12 |
| Control | 6018 | Progesterone receptor membrane component 1     | gi 1096593:85,gi 11549:5221,gi 116:248575,gi 7689365 | 21,605.30  | 100.00% | 4 | 5 | 9 | 0.09% | 19.10% | KFYGPPE GPYGVF AGR        | 4.91 | 1,644.82 |
| Control | 6018 | similar to ribosomal protein L27               | gi 2818971:7,gi 471170:99,gi 74268:027,gi 7740:4275  | 15,780.40  | 100.00% | 3 | 3 | 3 | 0.03% | 30.10% | NIDDGTS DRPYSH ALVAGI DR  | 3.71 | 2,272.10 |



|         |      |                                                                           |                                                                 |           |         |    |    |    |       |        |                                                |          |
|---------|------|---------------------------------------------------------------------------|-----------------------------------------------------------------|-----------|---------|----|----|----|-------|--------|------------------------------------------------|----------|
| Control | 6018 | similar to<br>ribosomal<br>protein<br>L27                                 | gi 2818971<br>7,gi 471170<br>99,gi 74268<br>027,gi 7740<br>4275 | 15,780.40 | 100.00% | 3  | 3  | 3  | 0.03% | 30.10% | VYNYNH 1.65<br>LMPTR                           | 1,423.68 |
| Control | 6018 | similar to<br>ribosomal<br>protein<br>L27                                 | gi 2818971<br>7,gi 471170<br>99,gi 74268<br>027,gi 7740<br>4275 | 15,780.40 | 100.00% | 3  | 3  | 3  | 0.03% | 30.10% | YSVDIPL 2.73<br>DK                             | 1,049.55 |
| Control | 6018 | PREDIC<br>TED:<br>heat<br>shock<br>60kDa<br>protein 1<br>(chaperon<br>in) | gi 1198882<br>28                                                | 75,015.00 | 100.00% | 6  | 7  | 7  | 0.07% | 14.70% | GVMLAV 2.48<br>DAVIAEL<br>KK                   | 1,572.90 |
| Control | 6018 | PREDIC<br>TED:<br>heat<br>shock<br>60kDa<br>protein 1<br>(chaperon<br>in) | gi 1198882<br>28                                                | 75,015.00 | 100.00% | 6  | 7  | 7  | 0.07% | 14.70% | IMQSSE 3.22<br>VGYDA<br>MLGDFV<br>NMVEK        | 2,566.15 |
| Control | 6018 | PREDIC<br>TED:<br>heat<br>shock<br>60kDa<br>protein 1<br>(chaperon<br>in) | gi 1198882<br>28                                                | 75,015.00 | 100.00% | 6  | 7  | 7  | 0.07% | 14.70% | ISSVQSI 3.83<br>VPALEIA<br>NAHR                | 1,905.06 |
| Control | 6018 | PREDIC<br>TED:<br>heat<br>shock<br>60kDa<br>protein 1<br>(chaperon<br>in) | gi 1198882<br>28                                                | 75,015.00 | 100.00% | 6  | 7  | 7  | 0.07% | 14.70% | LVQDVA 6.25<br>NNTNEE<br>AGDGTT<br>TATVLA<br>R | 2,560.25 |
| Control | 6018 | PREDIC<br>TED:<br>heat<br>shock<br>60kDa<br>protein 1<br>(chaperon<br>in) | gi 1198882<br>28                                                | 75,015.00 | 100.00% | 6  | 7  | 7  | 0.07% | 14.70% | TLNDEL 2.21<br>EIIEGMK                         | 1,504.76 |
| Control | 6018 | PREDIC<br>TED:<br>heat<br>shock<br>60kDa<br>protein 1<br>(chaperon<br>in) | gi 1198882<br>28                                                | 75,015.00 | 100.00% | 6  | 7  | 7  | 0.07% | 14.70% | VGLQVV 2.94<br>AVK                             | 912.5877 |
| Control | 6018 | CYB5R3<br>protein                                                         | gi 1488774<br>41,gi 15715<br>1718,gi 162<br>941,gi 1709<br>233  | 33,973.70 | 100.00% | 10 | 14 | 24 | 0.23% | 45.30% | DILLRPE 1.91<br>LEELRN<br>EHSAR                | 2,190.16 |
| Control | 6018 | CYB5R3<br>protein                                                         | gi 1488774<br>41,gi 15715<br>1718,gi 162<br>941,gi 1709<br>233  | 33,973.70 | 100.00% | 10 | 14 | 24 | 0.23% | 45.30% | FALPSPE 5.03<br>HILGLPV<br>GQHIYLS<br>AR       | 2,515.38 |

|         |      |                                           |                                                                |            |         |    |    |    |       |        |                                             |      |          |
|---------|------|-------------------------------------------|----------------------------------------------------------------|------------|---------|----|----|----|-------|--------|---------------------------------------------|------|----------|
| Control | 6018 | CYB5R3 protein                            | gi 1488774<br>41.gi 15715<br>1718.gi 162<br>941.gi 1709<br>233 | 33,973.70  | 100.00% | 10 | 14 | 24 | 0.23% | 45.30% | GPNGLL<br>VYQ GK                            | 3.99 | 1,145.63 |
| Control | 6018 | CYB5R3 protein                            | gi 1488774<br>41.gi 15715<br>1718.gi 162<br>941.gi 1709<br>233 | 33,973.70  | 100.00% | 10 | 14 | 24 | 0.23% | 45.30% | IDGNLVI<br>RPYTPV<br>SSDDDK<br>GFVDLVI<br>K | 4.54 | 2,975.57 |
| Control | 6018 | CYB5R3 protein                            | gi 1488774<br>41.gi 15715<br>1718.gi 162<br>941.gi 1709<br>233 | 33,973.70  | 100.00% | 10 | 14 | 24 | 0.23% | 45.30% | IGDTIEF<br>R                                | 2.74 | 950.4943 |
| Control | 6018 | CYB5R3 protein                            | gi 1488774<br>41.gi 15715<br>1718.gi 162<br>941.gi 1709<br>233 | 33,973.70  | 100.00% | 10 | 14 | 24 | 0.23% | 45.30% | LIDKEVI<br>SHDTR                            | 3.4  | 1,425.77 |
| Control | 6018 | CYB5R3 protein                            | gi 1488774<br>41.gi 15715<br>1718.gi 162<br>941.gi 1709<br>233 | 33,973.70  | 100.00% | 10 | 14 | 24 | 0.23% | 45.30% | LIDKEVI<br>SHDTRR                           | 2.47 | 1,581.87 |
| Control | 6018 | CYB5R3 protein                            | gi 1488774<br>41.gi 15715<br>1718.gi 162<br>941.gi 1709<br>233 | 33,973.70  | 100.00% | 10 | 14 | 24 | 0.23% | 45.30% | STPAITL<br>ENPDIK                           | 3.26 | 1,398.75 |
| Control | 6018 | CYB5R3 protein                            | gi 1488774<br>41.gi 15715<br>1718.gi 162<br>941.gi 1709<br>233 | 33,973.70  | 100.00% | 10 | 14 | 24 | 0.23% | 45.30% | STPAITL<br>ENPDIKY<br>PLR                   | 4.94 | 1,928.05 |
| Control | 6018 | CYB5R3 protein                            | gi 1488774<br>41.gi 15715<br>1718.gi 162<br>941.gi 1709<br>233 | 33,973.70  | 100.00% | 10 | 14 | 24 | 0.23% | 45.30% | SVG MIA<br>GGTGITP<br>MLQVIR                | 6.31 | 1,917.03 |
| Control | 6018 | endothelial cell adhesion molecule        | gi 1181512<br>18.gi 11991<br>9027.gi 868<br>23868              | 41,779.80  | 100.00% | 3  | 4  | 5  | 0.05% | 14.90% | ALEEPA<br>NDIKED<br>AIAPR                   | 4.53 | 1,851.94 |
| Control | 6018 | endothelial cell adhesion molecule        | gi 1181512<br>18.gi 11991<br>9027.gi 868<br>23868              | 41,779.80  | 100.00% | 3  | 4  | 5  | 0.05% | 14.90% | LGALTP<br>TPSLSSQ<br>VLPSPR                 | 2.91 | 1,921.08 |
| Control | 6018 | endothelial cell adhesion molecule        | gi 1181512<br>18.gi 11991<br>9027.gi 868<br>23868              | 41,779.80  | 100.00% | 3  | 4  | 5  | 0.05% | 14.90% | SPPSSQV<br>FFAPVL<br>DAIHGSL<br>SLK         | 3.69 | 2,397.28 |
| Control | 6018 | PREDICTED: heparan sulfate proteoglycan 2 | gi 1198889<br>79                                               | 467,987.40 | 100.00% | 7  | 7  | 7  | 0.07% | 2.87%  | FAPGDF<br>QQFALV<br>NPQR                    | 2.6  | 1,763.89 |
| Control | 6018 | PREDICTED: heparan sulfate proteoglycan 2 | gi 1198889<br>79                                               | 467,987.40 | 100.00% | 7  | 7  | 7  | 0.07% | 2.87%  | GTLEPV<br>QRPDVV<br>LVGAGH<br>R             | 3.72 | 2,000.10 |
| Control | 6018 | PREDICTED: heparan sulfate proteoglycan 2 | gi 1198889<br>79                                               | 467,987.40 | 100.00% | 7  | 7  | 7  | 0.07% | 2.87%  | IPGDQV<br>VSVVFIK                           | 4.06 | 1,400.81 |

|         |      |                                             |               |            |         |   |   |   |       |        |                                           |          |
|---------|------|---------------------------------------------|---------------|------------|---------|---|---|---|-------|--------|-------------------------------------------|----------|
| Control | 6018 | PREDIC TED: heparan sulfate proteogly can 2 | gi 1198889 79 | 467,987.40 | 100.00% | 7 | 7 | 7 | 0.07% | 2.87%  | IQVVVLP 3.58<br>GATTPP<br>VR              | 1,546.93 |
| Control | 6018 | PREDIC TED: heparan sulfate proteogly can 2 | gi 1198889 79 | 467,987.40 | 100.00% | 7 | 7 | 7 | 0.07% | 2.87%  | LDVEFK 4.43<br>PLAPDG<br>VLLFSG<br>GK     | 2,102.15 |
| Control | 6018 | PREDIC TED: heparan sulfate proteogly can 2 | gi 1198889 79 | 467,987.40 | 100.00% | 7 | 7 | 7 | 0.07% | 2.87%  | LRSPVISI 4.88<br>DPPSSTV<br>QQGQDA<br>SFK | 2,557.33 |
| Control | 6018 | PREDIC TED: heparan sulfate proteogly can 2 | gi 1198889 79 | 467,987.40 | 100.00% | 7 | 7 | 7 | 0.07% | 2.87%  | VVPYFT 3.43<br>QTPYSFL<br>PLPTIK          | 2,211.21 |
| Control | 6018 | PREDIC TED: keratin 19 isoform 8            | gi 1946761 68 | 51,863.50  | 100.00% | 7 | 7 | 9 | 0.09% | 15.90% | ALEEAN 3.24<br>ADLEVK                     | 1,301.66 |
| Control | 6018 | PREDIC TED: keratin 19 isoform 8            | gi 1946761 68 | 51,863.50  | 100.00% | 7 | 7 | 9 | 0.09% | 15.90% | ASLENSL 3.17<br>EETKGR                    | 1,433.72 |
| Control | 6018 | PREDIC TED: keratin 19 isoform 8            | gi 1946761 68 | 51,863.50  | 100.00% | 7 | 7 | 9 | 0.09% | 15.90% | LASYLD 2.97<br>KVR                        | 1,064.61 |
| Control | 6018 | PREDIC TED: keratin 19 isoform 8            | gi 1946761 68 | 51,863.50  | 100.00% | 7 | 7 | 9 | 0.09% | 15.90% | LEQEIAT 3.56<br>YR                        | 1,122.58 |
| Control | 6018 | PREDIC TED: keratin 19 isoform 8            | gi 1946761 68 | 51,863.50  | 100.00% | 7 | 7 | 9 | 0.09% | 15.90% | LLEGED 3.44<br>AHLSSS<br>QFSSGS<br>QSSR   | 2,309.06 |
| Control | 6018 | PREDIC TED: keratin 19 isoform 8            | gi 1946761 68 | 51,863.50  | 100.00% | 7 | 7 | 9 | 0.09% | 15.90% | TRLEQEI 3.68<br>ATYR                      | 1,379.73 |
| Control | 6018 | PREDIC TED: keratin 19 isoform 8            | gi 1946761 68 | 51,863.50  | 100.00% | 7 | 7 | 9 | 0.09% | 15.90% | VLDELTA 3.32<br>LAR                       | 1,029.59 |
| Control | 6018 | PTBP1 protein                               | gi 1584549 83 | 47,010.90  | 100.00% | 3 | 3 | 3 | 0.03% | 13.70% | IIVENLF 3.89<br>YPVTLD<br>VLHQIFS<br>K    | 2,488.39 |
| Control | 6018 | PTBP1 protein                               | gi 1584549 83 | 47,010.90  | 100.00% | 3 | 3 | 3 | 0.03% | 13.70% | KLPGDV 3.08<br>TEGEVIS<br>LGLPFG<br>K     | 2,056.13 |

|         |      |                                 |                                        |            |         |   |   |    |       |        |                                                |      |          |
|---------|------|---------------------------------|----------------------------------------|------------|---------|---|---|----|-------|--------|------------------------------------------------|------|----------|
| Control | 6018 | PTBP1 protein                   | gi 158454983                           | 47,010.90  | 100.00% | 3 | 3 | 3  | 0.03% | 13.70% | NNQFQA<br>LLQYAD<br>PVSAQH<br>AK               | 3.65 | 2,243.12 |
| Control | 6018 | Transmembrane protein 49        | gi 111307060,gi 115496266,gi 122133514 | 46,165.40  | 100.00% | 3 | 3 | 5  | 0.05% | 13.50% | EQYNGN<br>FTDPSSV<br>NEK                       | 4.08 | 1,828.80 |
| Control | 6018 | Transmembrane protein 49        | gi 111307060,gi 115496266,gi 122133514 | 46,165.40  | 100.00% | 3 | 3 | 5  | 0.05% | 13.50% | LAVQNL<br>VQK                                  | 2.45 | 1,012.62 |
| Control | 6018 | Transmembrane protein 49        | gi 111307060,gi 115496266,gi 122133514 | 46,165.40  | 100.00% | 3 | 3 | 5  | 0.05% | 13.50% | LSGAEP<br>DDEEYQ<br>EFEEML<br>EHAETA<br>QDFASR | 5.12 | 3,489.46 |
| Control | 6018 | KRT5 protein                    | gi 146186887,gi 56710317               | 62,920.60  | 100.00% | 3 | 4 | 23 | 0.22% | 5.32%  | LRSEIDN<br>VKK                                 | 3.35 | 1,201.69 |
| Control | 6018 | KRT5 protein                    | gi 146186887,gi 56710317               | 62,920.60  | 100.00% | 3 | 4 | 23 | 0.22% | 5.32%  | NKYEDE<br>INKR                                 | 3.12 | 1,308.65 |
| Control | 6018 | KRT5 protein                    | gi 146186887,gi 56710317               | 62,920.60  | 100.00% | 3 | 4 | 23 | 0.22% | 5.32%  | SLDLDSII<br>AEVK                               | 4.57 | 1,302.72 |
| Control | 6018 | MHC class I antigen             | gi 72536919                            | 40,523.80  | 99.80%  | 2 | 3 | 12 | 0.12% | 20.90% | GFMQFG<br>YDGR                                 | 3.46 | 1,193.50 |
| Control | 6018 | MHC class I antigen             | gi 72536919                            | 40,523.80  | 99.80%  | 2 | 3 | 12 | 0.12% | 20.90% | NGEDQT<br>QDMELV<br>ETRPSG<br>DGTFAQ           | 3.76 | 2,698.19 |
| Control | 6018 | MHC class I antigen             | gi 72536919                            | 40,523.80  | 99.80%  | 2 | 3 | 12 | 0.12% | 20.90% | SWTAAD<br>TAAQIT<br>K                          | 4.35 | 1,363.69 |
| Control | 6018 | MHC class I antigen             | gi 72536919                            | 40,523.80  | 99.80%  | 2 | 3 | 12 | 0.12% | 20.90% | VQHEGL<br>QEPLTLR                              | 4.05 | 1,519.82 |
| Control | 6018 | MHC class I antigen             | gi 72536919                            | 40,523.80  | 99.80%  | 2 | 3 | 12 | 0.12% | 20.90% | YFSTAV<br>SRPGLG<br>EPR                        | 2.42 | 1,636.84 |
| Control | 6018 | PREDICTED: similar to CG2943-PA | gi 119888913                           | 115,925.80 | 100.00% | 5 | 5 | 6  | 0.06% | 8.60%  | ALVQTE<br>DHLLFL<br>QLLAGR                     | 3.38 | 2,165.21 |
| Control | 6018 | PREDICTED: similar to CG2943-PA | gi 119888913                           | 115,925.80 | 100.00% | 5 | 5 | 6  | 0.06% | 8.60%  | HLLVGL<br>PSGAILS<br>LPK                       | 4.29 | 1,614.99 |
| Control | 6018 | PREDICTED: similar to CG2943-PA | gi 119888913                           | 115,925.80 | 100.00% | 5 | 5 | 6  | 0.06% | 8.60%  | NFPQAA<br>LVSFATT<br>GEK                       | 4.77 | 1,680.86 |
| Control | 6018 | PREDICTED: similar to CG2943-PA | gi 119888913                           | 115,925.80 | 100.00% | 5 | 5 | 6  | 0.06% | 8.60%  | QLHELA<br>PSIFFYL<br>VDADQGR                   | 3.38 | 2,319.18 |

|         |      |                                                                                                                                                         |                                        |            |         |   |   |   |       |        |                                    |      |          |
|---------|------|---------------------------------------------------------------------------------------------------------------------------------------------------------|----------------------------------------|------------|---------|---|---|---|-------|--------|------------------------------------|------|----------|
| Control | 6018 | PREDICTED:<br>similar to<br>CG2943-<br>CG2943-<br>PA                                                                                                    | gi 119888913                           | 115,925.80 | 100.00% | 5 | 5 | 6 | 0.06% | 8.60%  | RPVLQS<br>LLLPIMD<br>QDYAK         | 3.2  | 2,116.15 |
| Control | 6018 | SFXN3<br>protein                                                                                                                                        | gi 151554123,gi 156120541,gi 206558262 | 35,690.00  | 99.80%  | 2 | 2 | 3 | 0.03% | 9.35%  | AQIQEQ<br>NPSIEVV<br>YYNK          | 5.29 | 2,023.01 |
| Control | 6018 | SFXN3<br>protein                                                                                                                                        | gi 151554123,gi 156120541,gi 206558262 | 35,690.00  | 99.80%  | 2 | 2 | 3 | 0.03% | 9.35%  | NLLLSG<br>AQLEAS<br>R              | 4.23 | 1,371.76 |
| Control | 6018 | 2',5'-<br>oligoadenylate<br>synthetas<br>e 1,<br>40/46kDa                                                                                               | gi 158454990,gi 37953332,gi 94967004   | 45,118.40  | 100.00% | 3 | 4 | 7 | 0.07% | 11.10% | LNQAVE<br>FDVLP<br>FDALGQ<br>LTK   | 5.22 | 2,289.21 |
| Control | 6018 | 2',5'-<br>oligoadenylate<br>synthetas<br>e 1,<br>40/46kDa                                                                                               | gi 158454990,gi 37953332,gi 94967004   | 45,118.40  | 100.00% | 3 | 4 | 7 | 0.07% | 11.10% | PVILDPA<br>DPTGNV<br>AGK           | 3.84 | 1,563.84 |
| Control | 6018 | 2',5'-<br>oligoadenylate<br>synthetas<br>e 1,<br>40/46kDa                                                                                               | gi 158454990,gi 37953332,gi 94967004   | 45,118.40  | 100.00% | 3 | 4 | 7 | 0.07% | 11.10% | QLAKPR<br>PVILDPA<br>DPTGNV<br>AGK | 2.64 | 2,257.27 |
| Control | 6018 | KIAA1715                                                                                                                                                | gi 111304578,gi 115496264              | 48,163.90  | 99.90%  | 2 | 2 | 2 | 0.02% | 6.06%  | IVEYLV<br>GDGPQNR                  | 2.68 | 1,459.75 |
| Control | 6018 | KIAA1715                                                                                                                                                | gi 111304578,gi 115496264              | 48,163.90  | 99.90%  | 2 | 2 | 2 | 0.02% | 6.06%  | TVTPAL<br>SSNVLP<br>R              | 2.98 | 1,354.77 |
| Control | 6018 | RecName:<br>Full=Chloride<br>intracellular<br>channel<br>protein 4;<br>AltName:<br>Full=Intracellular<br>chloride<br>ion<br>channel<br>protein<br>p64H1 | gi 109877271,gi 122692293,gi 73587123  | 28,710.60  | 99.80%  | 2 | 3 | 3 | 0.03% | 14.20% | HPESNT<br>AGMDIF<br>AK             | 2.62 | 1,533.70 |

|         |      |                                                                                                                                                                         |                                                   |           |         |    |    |    |       |        |                                                |      |          |
|---------|------|-------------------------------------------------------------------------------------------------------------------------------------------------------------------------|---------------------------------------------------|-----------|---------|----|----|----|-------|--------|------------------------------------------------|------|----------|
| Control | 6018 | RecName<br>:<br>Full=Chl<br>oride<br>intracellu<br>lar<br>channel<br>protein 4;<br>AltName:<br>Full=Intr<br>acellular<br>chloride<br>ion<br>channel<br>protein<br>p64H1 | gi 1098772<br>71.gi 12269<br>2293.gi 735<br>87123 | 28,710.60 | 99.80%  | 2  | 3  | 3  | 0.03% | 14.20% | LDEYLN<br>SPLPDEI<br>DENSME<br>DIK             | 3.44 | 2,595.17 |
| Control | 6018 | Actin,<br>gamma 1                                                                                                                                                       | gi 1515543<br>60.gi 74354<br>242.gi 7581<br>2932  | 41,775.90 | 100.00% | 12 | 18 | 66 | 0.64% | 38.90% | AVFPSIV<br>GRPR                                | 2.87 | 1,198.71 |
| Control | 6018 | Actin,<br>gamma 1                                                                                                                                                       | gi 1515543<br>60.gi 74354<br>242.gi 7581<br>2932  | 41,775.90 | 100.00% | 12 | 18 | 66 | 0.64% | 38.90% | DLTDYL<br>MK                                   | 2.07 | 1,014.48 |
| Control | 6018 | Actin,<br>gamma 1                                                                                                                                                       | gi 1515543<br>60.gi 74354<br>242.gi 7581<br>2932  | 41,775.90 | 100.00% | 12 | 18 | 66 | 0.64% | 38.90% | DLYANT<br>VLSGGT<br>TMYPGI<br>ADR              | 5.35 | 2,231.07 |
| Control | 6018 | Actin,<br>gamma 1                                                                                                                                                       | gi 1515543<br>60.gi 74354<br>242.gi 7581<br>2932  | 41,775.90 | 100.00% | 12 | 18 | 66 | 0.64% | 38.90% | EITALAP<br>STMK                                | 2.81 | 1,161.62 |
| Control | 6018 | Actin,<br>gamma 1                                                                                                                                                       | gi 1515543<br>60.gi 74354<br>242.gi 7581<br>2932  | 41,775.90 | 100.00% | 12 | 18 | 66 | 0.64% | 38.90% | GYSFTT<br>TAER                                 | 3.39 | 1,132.53 |
| Control | 6018 | Actin,<br>gamma 1                                                                                                                                                       | gi 1515543<br>60.gi 74354<br>242.gi 7581<br>2932  | 41,775.90 | 100.00% | 12 | 18 | 66 | 0.64% | 38.90% | KDLYAN<br>TVLSGG<br>TTMYPG<br>IADR             | 5.27 | 2,359.16 |
| Control | 6018 | Actin,<br>gamma 1                                                                                                                                                       | gi 1515543<br>60.gi 74354<br>242.gi 7581<br>2932  | 41,775.90 | 100.00% | 12 | 18 | 66 | 0.64% | 38.90% | LDLAGR<br>DLTDYL<br>MK                         | 2.18 | 1,639.84 |
| Control | 6018 | Actin,<br>gamma 1                                                                                                                                                       | gi 1515543<br>60.gi 74354<br>242.gi 7581<br>2932  | 41,775.90 | 100.00% | 12 | 18 | 66 | 0.64% | 38.90% | QEYDES<br>GPSIVHR                              | 3.47 | 1,516.70 |
| Control | 6018 | Actin,<br>gamma 1                                                                                                                                                       | gi 1515543<br>60.gi 74354<br>242.gi 7581<br>2932  | 41,775.90 | 100.00% | 12 | 18 | 66 | 0.64% | 38.90% | QEYDES<br>GPSIVHR<br>K                         | 2.76 | 1,644.80 |
| Control | 6018 | Actin,<br>gamma 1                                                                                                                                                       | gi 1515543<br>60.gi 74354<br>242.gi 7581<br>2932  | 41,775.90 | 100.00% | 12 | 18 | 66 | 0.64% | 38.90% | SYELPD<br>GQVITIG<br>NER                       | 3.46 | 1,790.89 |
| Control | 6018 | Actin,<br>gamma 1                                                                                                                                                       | gi 1515543<br>60.gi 74354<br>242.gi 7581<br>2932  | 41,775.90 | 100.00% | 12 | 18 | 66 | 0.64% | 38.90% | TTGIVM<br>DSGDGV<br>THTVPIY<br>EGYALP<br>HAILR | 6.85 | 3,199.61 |
| Control | 6018 | Actin,<br>gamma 1                                                                                                                                                       | gi 1515543<br>60.gi 74354<br>242.gi 7581<br>2932  | 41,775.90 | 100.00% | 12 | 18 | 66 | 0.64% | 38.90% | VAPEEH<br>PVLLTE<br>APLNP                      | 4.73 | 1,954.06 |

|         |      |                                                                                                                                                                                                            |                                                                                   |           |         |    |    |    |       |        |                         |      |          |
|---------|------|------------------------------------------------------------------------------------------------------------------------------------------------------------------------------------------------------------|-----------------------------------------------------------------------------------|-----------|---------|----|----|----|-------|--------|-------------------------|------|----------|
| Control | 6018 | RecName gi 1098928 :<br>Full=Pept idyl-<br>tRNA<br>hydrolase<br>2,<br>mitochon<br>drial;<br>Short=PT<br>H 2;<br>AltName:<br>Full=Bcl-<br>2<br>inhibitor<br>of<br>transcript<br>ion;<br>Flags:<br>Precursor | gi 1098928<br>83,gi 11629<br>2141,gi 606<br>50282,gi 73<br>587109,gi 7<br>7735985 | 19,272.70 | 99.80%  | 2  | 2  | 2  | 0.02% | 16.20% | APDEET<br>LVELLT<br>HAK | 4.41 | 1,665.87 |
| Control | 6018 | RecName gi 1098928 :<br>Full=Pept idyl-<br>tRNA<br>hydrolase<br>2,<br>mitochon<br>drial;<br>Short=PT<br>H 2;<br>AltName:<br>Full=Bcl-<br>2<br>inhibitor<br>of<br>transcript<br>ion;<br>Flags:<br>Precursor | gi 1098928<br>83,gi 11629<br>2141,gi 606<br>50282,gi 73<br>587109,gi 7<br>7735985 | 19,272.70 | 99.80%  | 2  | 2  | 2  | 0.02% | 16.20% | VLGLTV<br>SLIQDAG<br>R  | 4.25 | 1,441.84 |
| Control | 6018 | PDIA3 protein                                                                                                                                                                                              | gi 1461869<br>33,gi 14823<br>0374                                                 | 56,913.80 | 100.00% | 18 | 21 | 32 | 0.31% | 37.20% | DLFSEA<br>HSEFLK        | 4.43 | 1,422.69 |
| Control | 6018 | PDIA3 protein                                                                                                                                                                                              | gi 1461869<br>33,gi 14823<br>0374                                                 | 56,913.80 | 100.00% | 18 | 21 | 32 | 0.31% | 37.20% | EATNPP<br>VIQEEKP<br>K  | 3.48 | 1,579.83 |
| Control | 6018 | PDIA3 protein                                                                                                                                                                                              | gi 1461869<br>33,gi 14823<br>0374                                                 | 56,913.80 | 100.00% | 18 | 21 | 32 | 0.31% | 37.20% | ELSDFIS<br>YLK          | 2.13 | 1,214.63 |
| Control | 6018 | PDIA3 protein                                                                                                                                                                                              | gi 1461869<br>33,gi 14823<br>0374                                                 | 56,913.80 | 100.00% | 18 | 21 | 32 | 0.31% | 37.20% | ELSDFIS<br>YLKR         | 2.66 | 1,370.73 |
| Control | 6018 | PDIA3 protein                                                                                                                                                                                              | gi 1461869<br>33,gi 14823<br>0374                                                 | 56,913.80 | 100.00% | 18 | 21 | 32 | 0.31% | 37.20% | FLEDYF<br>DGNLK         | 2.92 | 1,360.64 |
| Control | 6018 | PDIA3 protein                                                                                                                                                                                              | gi 1461869<br>33,gi 14823<br>0374                                                 | 56,913.80 | 100.00% | 18 | 21 | 32 | 0.31% | 37.20% | FLEDYF<br>DGNLKR        | 3.11 | 1,516.74 |
| Control | 6018 | PDIA3 protein                                                                                                                                                                                              | gi 1461869<br>33,gi 14823<br>0374                                                 | 56,913.80 | 100.00% | 18 | 21 | 32 | 0.31% | 37.20% | FVMQEE<br>FSR           | 3.2  | 1,188.54 |
| Control | 6018 | PDIA3 protein                                                                                                                                                                                              | gi 1461869<br>33,gi 14823<br>0374                                                 | 56,913.80 | 100.00% | 18 | 21 | 32 | 0.31% | 37.20% | GFPTIYF<br>SPANKK       | 2.43 | 1,469.78 |

|         |      |                                                                                                                                        |                                   |           |         |    |    |    |       |        |                                            |          |
|---------|------|----------------------------------------------------------------------------------------------------------------------------------------|-----------------------------------|-----------|---------|----|----|----|-------|--------|--------------------------------------------|----------|
| Control | 6018 | PDIA3<br>protein                                                                                                                       | gi 1461869<br>33,gi 14823<br>0374 | 56,913.80 | 100.00% | 18 | 21 | 32 | 0.31% | 37.20% | IFRDGEE 4.32<br>SGAYDG<br>PR               | 1,668.76 |
| Control | 6018 | PDIA3<br>protein                                                                                                                       | gi 1461869<br>33,gi 14823<br>0374 | 56,913.80 | 100.00% | 18 | 21 | 32 | 0.31% | 37.20% | KTFSHEL 3.48<br>SDFGLES<br>TTGEIPV<br>VAVR | 2,719.39 |
| Control | 6018 | PDIA3<br>protein                                                                                                                       | gi 1461869<br>33,gi 14823<br>0374 | 56,913.80 | 100.00% | 18 | 21 | 32 | 0.31% | 37.20% | LRKDPNI 3.08<br>VIAK                       | 1,266.79 |
| Control | 6018 | PDIA3<br>protein                                                                                                                       | gi 1461869<br>33,gi 14823<br>0374 | 56,913.80 | 100.00% | 18 | 21 | 32 | 0.31% | 37.20% | MDATAN 4.4<br>DVPSPY<br>EVR                | 1,680.75 |
| Control | 6018 | PDIA3<br>protein                                                                                                                       | gi 1461869<br>33,gi 14823<br>0374 | 56,913.80 | 100.00% | 18 | 21 | 32 | 0.31% | 37.20% | QAGPAS 2.78<br>VPLKSEE<br>EFEK             | 1,845.92 |
| Control | 6018 | PDIA3<br>protein                                                                                                                       | gi 1461869<br>33,gi 14823<br>0374 | 56,913.80 | 100.00% | 18 | 21 | 32 | 0.31% | 37.20% | SEPIPES 2.44<br>NDGPVK                     | 1,368.66 |
| Control | 6018 | PDIA3<br>protein                                                                                                                       | gi 1461869<br>33,gi 14823<br>0374 | 56,913.80 | 100.00% | 18 | 21 | 32 | 0.31% | 37.20% | TADGIVS 2.64<br>HLK                        | 1,040.57 |
| Control | 6018 | PDIA3<br>protein                                                                                                                       | gi 1461869<br>33,gi 14823<br>0374 | 56,913.80 | 100.00% | 18 | 21 | 32 | 0.31% | 37.20% | TADGIVS 2.13<br>HLKK                       | 1,168.67 |
| Control | 6018 | PDIA3<br>protein                                                                                                                       | gi 1461869<br>33,gi 14823<br>0374 | 56,913.80 | 100.00% | 18 | 21 | 32 | 0.31% | 37.20% | TFSHEL 3.85<br>DFGLEST<br>TGEIPVV<br>AVR   | 2,591.30 |
| Control | 6018 | PDIA3<br>protein                                                                                                                       | gi 1461869<br>33,gi 14823<br>0374 | 56,913.80 | 100.00% | 18 | 21 | 32 | 0.31% | 37.20% | YGVSGY 3.07<br>PTLK                        | 1,084.57 |
| Control | 6018 | MCAM<br>protein                                                                                                                        | gi 1584550<br>45,gi 15851<br>9851 | 48,983.20 | 100.00% | 2  | 3  | 5  | 0.05% | 4.55%  | EMEEER 4.53<br>TDDNGV<br>LVLDPA<br>QK      | 2,304.07 |
| Control | 6018 | MCAM<br>protein                                                                                                                        | gi 1584550<br>45,gi 15851<br>9851 | 48,983.20 | 100.00% | 2  | 3  | 5  | 0.05% | 4.55%  | TDDNGV 2.81<br>LVLDPA<br>QK                | 1,484.76 |
| Control | 6018 | PECAM1<br>protein                                                                                                                      | gi 1113085<br>31                  | 82,597.50 | 100.00% | 5  | 7  | 22 | 0.21% | 6.37%  | APVHFTI 2.42<br>EK                         | 1,041.57 |
| Control | 6018 | PECAM1<br>protein                                                                                                                      | gi 1113085<br>31                  | 82,597.50 | 100.00% | 5  | 7  | 22 | 0.21% | 6.37%  | FHIPEG 2.86<br>K                           | 940.5252 |
| Control | 6018 | PECAM1<br>protein                                                                                                                      | gi 1113085<br>31                  | 82,597.50 | 100.00% | 5  | 7  | 22 | 0.21% | 6.37%  | GTETVY 2.63<br>SEIR                        | 1,154.57 |
| Control | 6018 | PECAM1<br>protein                                                                                                                      | gi 1113085<br>31                  | 82,597.50 | 100.00% | 5  | 7  | 22 | 0.21% | 6.37%  | PAVPLL 2.39<br>NSNNEK                      | 1,295.70 |
| Control | 6018 | PECAM1<br>protein                                                                                                                      | gi 1113085<br>31                  | 82,597.50 | 100.00% | 5  | 7  | 22 | 0.21% | 6.37%  | QMPVE 2.96<br>MSRPAV<br>PLLNSN<br>NEK      | 2,270.13 |
| Control | 6018 | RecName<br>:<br>Full=FAS-4259,gi 886<br>associate<br>d factor<br>2;<br>AltName:<br>Full=UB<br>X domain-<br>containin<br>g protein<br>8 | gi 1098961<br>51,gi 11600         | 52,646.60 | 100.00% | 2  | 2  | 2  | 0.02% | 4.72%  | FQIEANF 2.74<br>PR                         | 1,121.57 |



|         |      |                                                                                                                            |                                                   |           |         |    |    |     |       |        |                                   |      |          |
|---------|------|----------------------------------------------------------------------------------------------------------------------------|---------------------------------------------------|-----------|---------|----|----|-----|-------|--------|-----------------------------------|------|----------|
| Control | 6018 | RecName<br>:<br>Full=FAS<br>associate<br>d factor<br>2;<br>AltName:<br>Full=UB<br>X domain-<br>containin<br>g protein<br>8 | gi 1098961<br>51.gi 11600<br>4259.gi 886<br>83021 | 52,646.60 | 100.00% | 2  | 2  | 2   | 0.02% | 4.72%  | QQQDEA<br>YLASLR                  | 3.39 | 1,421.70 |
| Control | 6018 | RecName<br>:<br>Full=40S<br>ribosomal<br>protein<br>S16                                                                    | gi 1088609<br>53.gi 74354<br>274.gi 7581<br>2950  | 16,427.90 | 99.90%  | 2  | 2  | 2   | 0.02% | 15.10% | EIKDILIQ<br>YDR                   | 3.2  | 1,405.77 |
| Control | 6018 | RecName<br>:<br>Full=40S<br>ribosomal<br>protein<br>S16                                                                    | gi 1088609<br>53.gi 74354<br>274.gi 7581<br>2950  | 16,427.90 | 99.90%  | 2  | 2  | 2   | 0.02% | 15.10% | GPLQSV<br>QVFGR                   | 3.42 | 1,187.65 |
| Control | 6018 | vimentin<br>70                                                                                                             | gi 1103475<br>70                                  | 53,710.80 | 100.00% | 33 | 47 | 126 | 1.23% | 66.10% | DGQVIN<br>ETSQHH<br>DDLE          | 3.71 | 1,836.80 |
| Control | 6018 | vimentin<br>70                                                                                                             | gi 1103475<br>70                                  | 53,710.80 | 100.00% | 33 | 47 | 126 | 1.23% | 66.10% | DNLAEDI<br>MR                     | 2.56 | 1,092.50 |
| Control | 6018 | vimentin<br>70                                                                                                             | gi 1103475<br>70                                  | 53,710.80 | 100.00% | 33 | 47 | 126 | 1.23% | 66.10% | EEAESTL<br>QSFR                   | 2.78 | 1,296.61 |
| Control | 6018 | vimentin<br>70                                                                                                             | gi 1103475<br>70                                  | 53,710.80 | 100.00% | 33 | 47 | 126 | 1.23% | 66.10% | EEAESTL<br>QSFRQD<br>VDNASL<br>AR | 4.03 | 2,366.12 |
| Control | 6018 | vimentin<br>70                                                                                                             | gi 1103475<br>70                                  | 53,710.80 | 100.00% | 33 | 47 | 126 | 1.23% | 66.10% | EKLQEE<br>MLQREE<br>AESTLQS<br>FR | 5.58 | 2,597.25 |
| Control | 6018 | vimentin<br>70                                                                                                             | gi 1103475<br>70                                  | 53,710.80 | 100.00% | 33 | 47 | 126 | 1.23% | 66.10% | EMEENF<br>SVEAAN<br>YQDTIG<br>R   | 4.54 | 2,202.96 |
| Control | 6018 | vimentin<br>70                                                                                                             | gi 1103475<br>70                                  | 53,710.80 | 100.00% | 33 | 47 | 126 | 1.23% | 66.10% | ETNLDS<br>LPLVDT<br>HSK           | 4.58 | 1,668.84 |
| Control | 6018 | vimentin<br>70                                                                                                             | gi 1103475<br>70                                  | 53,710.80 | 100.00% | 33 | 47 | 126 | 1.23% | 66.10% | ETNLDS<br>LPLVDT<br>HSKR          | 3.39 | 1,824.95 |
| Control | 6018 | vimentin<br>70                                                                                                             | gi 1103475<br>70                                  | 53,710.80 | 100.00% | 33 | 47 | 126 | 1.23% | 66.10% | EYQDLL<br>NVK                     | 2.25 | 1,121.58 |
| Control | 6018 | vimentin<br>70                                                                                                             | gi 1103475<br>70                                  | 53,710.80 | 100.00% | 33 | 47 | 126 | 1.23% | 66.10% | FADLSE<br>AANR                    | 4.55 | 1,093.53 |
| Control | 6018 | vimentin<br>70                                                                                                             | gi 1103475<br>70                                  | 53,710.80 | 100.00% | 33 | 47 | 126 | 1.23% | 66.10% | FADLSE<br>AANRNN<br>DALR          | 2.63 | 1,776.86 |
| Control | 6018 | vimentin<br>70                                                                                                             | gi 1103475<br>70                                  | 53,710.80 | 100.00% | 33 | 47 | 126 | 1.23% | 66.10% | FANYID<br>KVR                     | 2.86 | 1,125.61 |
| Control | 6018 | vimentin<br>70                                                                                                             | gi 1103475<br>70                                  | 53,710.80 | 100.00% | 33 | 47 | 126 | 1.23% | 66.10% | ILLAELE<br>QLK                    | 4.39 | 1,169.71 |
| Control | 6018 | vimentin<br>70                                                                                                             | gi 1103475<br>70                                  | 53,710.80 | 100.00% | 33 | 47 | 126 | 1.23% | 66.10% | ILLAELE<br>QLKGQG<br>K            | 2.07 | 1,539.91 |
| Control | 6018 | vimentin<br>70                                                                                                             | gi 1103475<br>70                                  | 53,710.80 | 100.00% | 33 | 47 | 126 | 1.23% | 66.10% | ISLPLPN<br>FSSLNLR                | 5.21 | 1,570.90 |

|         |      |          |                  |           |         |    |    |     |       |        |                                                              |          |
|---------|------|----------|------------------|-----------|---------|----|----|-----|-------|--------|--------------------------------------------------------------|----------|
| Control | 6018 | vimentin | gi 1103475<br>70 | 53,710.80 | 100.00% | 33 | 47 | 126 | 1.23% | 66.10% | KLHDEEI 6.68<br>QELQAQI<br>QEQHVV<br>IDMDVS<br>KPDLLA<br>ALR | 4,085.06 |
| Control | 6018 | vimentin | gi 1103475<br>70 | 53,710.80 | 100.00% | 33 | 47 | 126 | 1.23% | 66.10% | KVESLQ 5.23<br>EEIAFLK                                       | 1,533.85 |
| Control | 6018 | vimentin | gi 1103475<br>70 | 53,710.80 | 100.00% | 33 | 47 | 126 | 1.23% | 66.10% | KVESLQ 4.49<br>EEIAFLK                                       | 1,661.95 |
| Control | 6018 | vimentin | gi 1103475<br>70 | 53,710.80 | 100.00% | 33 | 47 | 126 | 1.23% | 66.10% | LHDEEIQ 5.43<br>ELQAQIQ<br>EQHVQI<br>DMDVSK<br>PDLTAA<br>LR  | 3,956.97 |
| Control | 6018 | vimentin | gi 1103475<br>70 | 53,710.80 | 100.00% | 33 | 47 | 126 | 1.23% | 66.10% | LLQDSV 4.92<br>DFSLAD<br>AINTEFK                             | 2,126.07 |
| Control | 6018 | vimentin | gi 1103475<br>70 | 53,710.80 | 100.00% | 33 | 47 | 126 | 1.23% | 66.10% | LQDEIQ 3.84<br>NMKEE<br>MAR                                  | 1,750.81 |
| Control | 6018 | vimentin | gi 1103475<br>70 | 53,710.80 | 100.00% | 33 | 47 | 126 | 1.23% | 66.10% | LQEEML 4.78<br>QREEAE<br>STLQSFR                             | 2,340.11 |
| Control | 6018 | vimentin | gi 1103475<br>70 | 53,710.80 | 100.00% | 33 | 47 | 126 | 1.23% | 66.10% | LQEEML 3.86<br>QREEAE<br>STLQSFR<br>QDVDNA<br>SLAR           | 3,393.63 |
| Control | 6018 | vimentin | gi 1103475<br>70 | 53,710.80 | 100.00% | 33 | 47 | 126 | 1.23% | 66.10% | MALDIEI 4.64<br>ATYR                                         | 1,311.66 |
| Control | 6018 | vimentin | gi 1103475<br>70 | 53,710.80 | 100.00% | 33 | 47 | 126 | 1.23% | 66.10% | NLQEAE 3.09<br>EWYK                                          | 1,309.61 |
| Control | 6018 | vimentin | gi 1103475<br>70 | 53,710.80 | 100.00% | 33 | 47 | 126 | 1.23% | 66.10% | RMFGGP 1.9<br>GTASRP<br>SSTR                                 | 1,680.82 |
| Control | 6018 | vimentin | gi 1103475<br>70 | 53,710.80 | 100.00% | 33 | 47 | 126 | 1.23% | 66.10% | TLYTSSP 4.25<br>GGVYAT<br>R                                  | 1,472.74 |
| Control | 6018 | vimentin | gi 1103475<br>70 | 53,710.80 | 100.00% | 33 | 47 | 126 | 1.23% | 66.10% | TNEKVE 4.83<br>LQELND<br>R                                   | 1,587.80 |
| Control | 6018 | vimentin | gi 1103475<br>70 | 53,710.80 | 100.00% | 33 | 47 | 126 | 1.23% | 66.10% | TNEKVE 3.76<br>LQELND<br>RFANYI<br>DK                        | 2,439.22 |
| Control | 6018 | vimentin | gi 1103475<br>70 | 53,710.80 | 100.00% | 33 | 47 | 126 | 1.23% | 66.10% | TVETRD 4.27<br>GQVINE<br>TSQHHD<br>DLE                       | 2,423.11 |
| Control | 6018 | vimentin | gi 1103475<br>70 | 53,710.80 | 100.00% | 33 | 47 | 126 | 1.23% | 66.10% | VELQEL 3.18<br>NDR                                           | 1,115.57 |
| Control | 6018 | vimentin | gi 1103475<br>70 | 53,710.80 | 100.00% | 33 | 47 | 126 | 1.23% | 66.10% | VESLQE 3.73<br>EIAFLK                                        | 1,405.76 |
| Control | 6018 | vimentin | gi 1103475<br>70 | 53,710.80 | 100.00% | 33 | 47 | 126 | 1.23% | 66.10% | VEVERD 4.22<br>NLAEDI<br>MR                                  | 1,688.83 |

|         |      |                                                                                                      |                                                                    |           |         |   |   |    |       |        |                                  |      |          |
|---------|------|------------------------------------------------------------------------------------------------------|--------------------------------------------------------------------|-----------|---------|---|---|----|-------|--------|----------------------------------|------|----------|
| Control | 6018 | PREDICTED: similar to Rho GDP dissociation inhibitor 1 (Rho GDI 1) (Rho-GDI alpha) (GDI-1) isoform 1 | gi 1199383.19.gi 121107.gi 286037.74.gi 714.gi 7245833.gi 73587159 | 23,403.80 | 99.80%  | 2 | 2 | 2  | 0.02% | 16.20% | SIQEIQE LDKDDE SLRK              | 2.99 | 2,046.04 |
| Control | 6018 | PREDICTED: similar to Rho GDP dissociation inhibitor 1 (Rho GDI 1) (Rho-GDI alpha) (GDI-1) isoform 1 | gi 1199383.19.gi 121107.gi 286037.74.gi 714.gi 7245833.gi 73587159 | 23,403.80 | 99.80%  | 2 | 2 | 2  | 0.02% | 16.20% | VAVSAD PNVPNV VVTR               | 4.38 | 1,636.90 |
| Control | 6018 | Leucine rich repeat containing protein 59                                                            | gi 1096593.25.gi 59857.957.gi 7507.0060.gi 777.36103               | 34,862.40 | 100.00% | 7 | 9 | 16 | 0.16% | 22.20% | DKLDGN ELDLSLS DLNEVP VK         | 6.79 | 2,313.18 |
| Control | 6018 | Leucine rich repeat containing protein 59                                                            | gi 1096593.25.gi 59857.957.gi 7507.0060.gi 777.36103               | 34,862.40 | 100.00% | 7 | 9 | 16 | 0.16% | 22.20% | DKLDGN ELDLSLS DLNEVP VKELAA LPK | 5.92 | 3,035.62 |
| Control | 6018 | Leucine rich repeat containing protein 59                                                            | gi 1096593.25.gi 59857.957.gi 7507.0060.gi 777.36103               | 34,862.40 | 100.00% | 7 | 9 | 16 | 0.16% | 22.20% | LDGNEL DLSLSDL NEVPVK            | 4.77 | 2,070.06 |
| Control | 6018 | Leucine rich repeat containing protein 59                                                            | gi 1096593.25.gi 59857.957.gi 7507.0060.gi 777.36103               | 34,862.40 | 100.00% | 7 | 9 | 16 | 0.16% | 22.20% | LDGNEL DLSLSDL NEVPVK ELAALP K   | 3.35 | 2,792.49 |
| Control | 6018 | Leucine rich repeat containing protein 59                                                            | gi 1096593.25.gi 59857.957.gi 7507.0060.gi 777.36103               | 34,862.40 | 100.00% | 7 | 9 | 16 | 0.16% | 22.20% | LVNLQH LDLLNN R                  | 3.27 | 1,561.88 |
| Control | 6018 | Leucine rich repeat containing protein 59                                                            | gi 1096593.25.gi 59857.957.gi 7507.0060.gi 777.36103               | 34,862.40 | 100.00% | 7 | 9 | 16 | 0.16% | 22.20% | LVTLPVS FAQLK                    | 3.35 | 1,315.80 |
| Control | 6018 | Leucine rich repeat containing protein 59                                                            | gi 1096593.25.gi 59857.957.gi 7507.0060.gi 777.36103               | 34,862.40 | 100.00% | 7 | 9 | 16 | 0.16% | 22.20% | WDLKDNPLDPV LAK                  | 3.28 | 1,736.96 |

|         |      |                                                                                                                                                                                                                                                           |                                                                   |           |         |   |   |   |       |        |                          |      |          |
|---------|------|-----------------------------------------------------------------------------------------------------------------------------------------------------------------------------------------------------------------------------------------------------------|-------------------------------------------------------------------|-----------|---------|---|---|---|-------|--------|--------------------------|------|----------|
| Control | 6018 | RecName<br>:<br>Full=CD<br>GSH iron<br>sulfur<br>domain-<br>containin<br>g protein<br>1;<br>AltName:<br>Full=Mit<br>oNEET                                                                                                                                 | gi 1108257<br>57,gi 73587<br>067,gi 7740<br>4223                  | 11,964.80 | 99.80%  | 2 | 3 | 5 | 0.05% | 26.40% | HNEETG<br>DNVGPLI<br>IK  | 4.99 | 1,635.83 |
| Control | 6018 | RecName<br>:<br>Full=CD<br>GSH iron<br>sulfur<br>domain-<br>containin<br>g protein<br>1;<br>AltName:<br>Full=Mit<br>oNEET                                                                                                                                 | gi 1108257<br>57,gi 73587<br>067,gi 7740<br>4223                  | 11,964.80 | 99.80%  | 2 | 3 | 5 | 0.05% | 26.40% | VVHAFD<br>MEDLGD<br>K    | 3.78 | 1,491.68 |
| Control | 6018 | 17,000<br>dalton<br>myosin<br>light<br>chain                                                                                                                                                                                                              | gi 578,gi 74<br>268209                                            | 16,942.80 | 99.80%  | 2 | 2 | 2 | 0.02% | 19.20% | ALGQNP<br>TNAEVL<br>K    | 2.88 | 1,354.73 |
| Control | 6018 | 17,000<br>dalton<br>myosin<br>light<br>chain                                                                                                                                                                                                              | gi 578,gi 74<br>268209                                            | 16,942.80 | 99.80%  | 2 | 2 | 2 | 0.02% | 19.20% | VLDFEH<br>FLPMLQ<br>TVAK | 2.77 | 1,904.00 |
| Control | 6018 | RecName<br>:<br>Full=Stre<br>ss-70<br>protein,<br>mitochon<br>drial;<br>AltName:<br>Full=75<br>kDa<br>glucose-<br>regulated<br>protein;<br>AltName:<br>Full=GR<br>P 75;<br>AltName:<br>Full=Hea<br>t shock<br>70 kDa<br>protein 9;<br>Flags:<br>Precursor | gi 1221440<br>79,gi 14623<br>1780,gi 735<br>86960,gi 77<br>735995 | 73,724.40 | 100.00% | 7 | 7 | 9 | 0.09% | 14.70% | DAGQIS<br>GLNVLR         | 2.75 | 1,242.68 |

|         |      |                                                                                                                                                                                                                                                                                                                 |           |         |   |   |   |       |        |                              |          |
|---------|------|-----------------------------------------------------------------------------------------------------------------------------------------------------------------------------------------------------------------------------------------------------------------------------------------------------------------|-----------|---------|---|---|---|-------|--------|------------------------------|----------|
| Control | 6018 | RecName gi 1221440<br>: 79,gi 14623<br>Full=Stre 1780,gi 735<br>ss-70 86960,gi 77<br>protein, 735995<br>mitochon<br>drial;<br>AltName:<br>Full=75<br>kDa<br>glucose-<br>regulated<br>protein;<br>AltName:<br>Full=GR<br>P 75;<br>AltName:<br>Full=Hea<br>t shock<br>70 kDa<br>protein 9;<br>Flags:<br>Precursor | 73,724.40 | 100.00% | 7 | 7 | 9 | 0.09% | 14.70% | ETGVDL 2.47<br>TKDNMA<br>LQR | 1,706.84 |
| Control | 6018 | RecName gi 1221440<br>: 79,gi 14623<br>Full=Stre 1780,gi 735<br>ss-70 86960,gi 77<br>protein, 735995<br>mitochon<br>drial;<br>AltName:<br>Full=75<br>kDa<br>glucose-<br>regulated<br>protein;<br>AltName:<br>Full=GR<br>P 75;<br>AltName:<br>Full=Hea<br>t shock<br>70 kDa<br>protein 9;<br>Flags:<br>Precursor | 73,724.40 | 100.00% | 7 | 7 | 9 | 0.09% | 14.70% | MKETAE 3.62<br>NYLGHT<br>AK  | 1,608.77 |

|         |      |                                                                                                                                                                                                                                                                                                                 |           |         |   |   |   |       |        |                              |          |
|---------|------|-----------------------------------------------------------------------------------------------------------------------------------------------------------------------------------------------------------------------------------------------------------------------------------------------------------------|-----------|---------|---|---|---|-------|--------|------------------------------|----------|
| Control | 6018 | RecName gi 1221440 :<br>79,gi 14623<br>Full=Stre 1780,gi 735<br>ss-70 86960,gi 77<br>protein, 735995<br>mitochon<br>drial;<br>AltName:<br>Full=75<br>kDa<br>glucose-<br>regulated<br>protein;<br>AltName:<br>Full=GR<br>P 75;<br>AltName:<br>Full=Hea<br>t shock<br>70 kDa<br>protein 9;<br>Flags:<br>Precursor | 73,724.40 | 100.00% | 7 | 7 | 9 | 0.09% | 14.70% | NAVITVP 2.46<br>AYFNDS<br>QR | 1,694.85 |
| Control | 6018 | RecName gi 1221440 :<br>79,gi 14623<br>Full=Stre 1780,gi 735<br>ss-70 86960,gi 77<br>protein, 735995<br>mitochon<br>drial;<br>AltName:<br>Full=75<br>kDa<br>glucose-<br>regulated<br>protein;<br>AltName:<br>Full=GR<br>P 75;<br>AltName:<br>Full=Hea<br>t shock<br>70 kDa<br>protein 9;<br>Flags:<br>Precursor | 73,724.40 | 100.00% | 7 | 7 | 9 | 0.09% | 14.70% | QAVTNP 3.7<br>NNTFYA<br>TK   | 1,568.77 |

|         |      |                                                                                                                                                                                                                                                           |                                                                   |           |         |   |    |    |       |        |                                   |      |          |
|---------|------|-----------------------------------------------------------------------------------------------------------------------------------------------------------------------------------------------------------------------------------------------------------|-------------------------------------------------------------------|-----------|---------|---|----|----|-------|--------|-----------------------------------|------|----------|
| Control | 6018 | RecName<br>:<br>Full=Stre<br>ss-70<br>protein,<br>mitochon<br>drial;<br>AltName:<br>Full=75<br>kDa<br>glucose-<br>regulated<br>protein;<br>AltName:<br>Full=GR<br>P 75;<br>AltName:<br>Full=Hea<br>t shock<br>70 kDa<br>protein 9;<br>Flags:<br>Precursor | gi 1221440<br>79,gi 14623<br>1780,gi 735<br>86960,gi 77<br>735995 | 73,724.40 | 100.00% | 7 | 7  | 9  | 0.09% | 14.70% | STNGDT<br>FLGGED<br>FDQALL<br>R   | 4.33 | 2,055.96 |
| Control | 6018 | RecName<br>:<br>Full=Stre<br>ss-70<br>protein,<br>mitochon<br>drial;<br>AltName:<br>Full=75<br>kDa<br>glucose-<br>regulated<br>protein;<br>AltName:<br>Full=GR<br>P 75;<br>AltName:<br>Full=Hea<br>t shock<br>70 kDa<br>protein 9;<br>Flags:<br>Precursor | gi 1221440<br>79,gi 14623<br>1780,gi 735<br>86960,gi 77<br>735995 | 73,724.40 | 100.00% | 7 | 7  | 9  | 0.09% | 14.70% | VQQTIVQ<br>DLFGR                  | 3.27 | 1,290.68 |
| Control | 6018 | Actin,<br>alpha,<br>cardiac<br>muscle 1                                                                                                                                                                                                                   | gi 7358703<br>9,gi 777361<br>17                                   | 42,002.10 | 100.00% | 7 | 10 | 11 | 0.11% | 42.70% | AVFPSIV<br>GRPR                   | 2.87 | 1,198.71 |
| Control | 6018 | Actin,<br>alpha,<br>cardiac<br>muscle 1                                                                                                                                                                                                                   | gi 7358703<br>9,gi 777361<br>17                                   | 42,002.10 | 100.00% | 7 | 10 | 11 | 0.11% | 42.70% | DLTDYL<br>MK                      | 2.07 | 1,014.48 |
| Control | 6018 | Actin,<br>alpha,<br>cardiac<br>muscle 1                                                                                                                                                                                                                   | gi 7358703<br>9,gi 777361<br>17                                   | 42,002.10 | 100.00% | 7 | 10 | 11 | 0.11% | 42.70% | DLYANN<br>VLSGGT<br>TMYPGI<br>ADR | 5    | 2,244.06 |
| Control | 6018 | Actin,<br>alpha,<br>cardiac<br>muscle 1                                                                                                                                                                                                                   | gi 7358703<br>9,gi 777361<br>17                                   | 42,002.10 | 100.00% | 7 | 10 | 11 | 0.11% | 42.70% | EITALAP<br>STMK                   | 2.81 | 1,161.62 |

|         |      |                                   |                             |           |         |   |    |    |       |        |                                    |      |          |
|---------|------|-----------------------------------|-----------------------------|-----------|---------|---|----|----|-------|--------|------------------------------------|------|----------|
| Control | 6018 | Actin, alpha, cardiac muscle 1    | gi 7358703.9,gi 777361.17   | 42,002.10 | 100.00% | 7 | 10 | 11 | 0.11% | 42.70% | GYSFVT TAER                        | 3.36 | 1,130.55 |
| Control | 6018 | Actin, alpha, cardiac muscle 1    | gi 7358703.9,gi 777361.17   | 42,002.10 | 100.00% | 7 | 10 | 11 | 0.11% | 42.70% | KDLYAN NVLSGG TTMYPG IADR          | 4.88 | 2,372.16 |
| Control | 6018 | Actin, alpha, cardiac muscle 1    | gi 7358703.9,gi 777361.17   | 42,002.10 | 100.00% | 7 | 10 | 11 | 0.11% | 42.70% | LDLAGR DLTDYL MK                   | 2.18 | 1,639.84 |
| Control | 6018 | Actin, alpha, cardiac muscle 1    | gi 7358703.9,gi 777361.17   | 42,002.10 | 100.00% | 7 | 10 | 11 | 0.11% | 42.70% | QEYDEA GPSIVHR                     | 2.57 | 1,500.71 |
| Control | 6018 | Actin, alpha, cardiac muscle 1    | gi 7358703.9,gi 777361.17   | 42,002.10 | 100.00% | 7 | 10 | 11 | 0.11% | 42.70% | SYELPD GOVITIG NER                 | 3.46 | 1,790.89 |
| Control | 6018 | Actin, alpha, cardiac muscle 1    | gi 7358703.9,gi 777361.17   | 42,002.10 | 100.00% | 7 | 10 | 11 | 0.11% | 42.70% | TTGIVLD SGDGVT HNVPIYE GYALPH AIMR | 5.82 | 3,212.60 |
| Control | 6018 | Actin, alpha, cardiac muscle 1    | gi 7358703.9,gi 777361.17   | 42,002.10 | 100.00% | 7 | 10 | 11 | 0.11% | 42.70% | VAPEEH PTLLEA PLNPK                | 4.23 | 1,956.04 |
| Control | 6018 | Actin, alpha, cardiac muscle 1    | gi 7358703.9,gi 777361.17   | 42,002.10 | 100.00% | 7 | 10 | 11 | 0.11% | 42.70% | YPIEHGII TNWDD MEK                 | 3.43 | 1,976.91 |
| Control | 6018 | RAB14 protein                     | gi 1584550.25,gi 19553.9521 | 23,879.60 | 100.00% | 5 | 7  | 11 | 0.11% | 38.60% | GAAGAL R MVYDIT                    | 3.87 | 1,353.68 |
| Control | 6018 | RAB14 protein                     | gi 1584550.25,gi 19553.9521 | 23,879.60 | 100.00% | 5 | 7  | 11 | 0.11% | 38.60% | IYQNIQD GSLLDN AAESGV QHKPSA PQGGR | 4.4  | 3,150.56 |
| Control | 6018 | RAB14 protein                     | gi 1584550.25,gi 19553.9521 | 23,879.60 | 100.00% | 5 | 7  | 11 | 0.11% | 38.60% | LQIWDT AGQER                       | 2.62 | 1,316.66 |
| Control | 6018 | RAB14 protein                     | gi 1584550.25,gi 19553.9521 | 23,879.60 | 100.00% | 5 | 7  | 11 | 0.11% | 38.60% | NLTNPN TVIILIGN K                  | 4.71 | 1,623.94 |
| Control | 6018 | RAB14 protein                     | gi 1584550.25,gi 19553.9521 | 23,879.60 | 100.00% | 5 | 7  | 11 | 0.11% | 38.60% | TGENVE DAFLEA AK                   | 2.98 | 1,493.71 |
| Control | 6018 | RAB2A, member RAS oncogene family | gi 1099399.03,gi 11673.4835 | 20,833.10 | 100.00% | 5 | 6  | 8  | 0.08% | 34.40% | EHGLIF METSAK                      | 3.17 | 1,378.67 |
| Control | 6018 | RAB2A, member RAS oncogene family | gi 1099399.03,gi 11673.4835 | 20,833.10 | 100.00% | 5 | 6  | 8  | 0.08% | 34.40% | FQPVHD LTIGVEF GAR                 | 5.19 | 1,785.93 |
| Control | 6018 | RAB2A, member RAS oncogene family | gi 1099399.03,gi 11673.4835 | 20,833.10 | 100.00% | 5 | 6  | 8  | 0.08% | 34.40% | GAAGAL LVYDITR                     | 3.63 | 1,319.73 |



|         |      |                                                                                                        |                                                                                                                                                       |           |         |   |   |    |       |        |                                                |      |          |
|---------|------|--------------------------------------------------------------------------------------------------------|-------------------------------------------------------------------------------------------------------------------------------------------------------|-----------|---------|---|---|----|-------|--------|------------------------------------------------|------|----------|
| Control | 6018 | RAB2A, member RAS oncogene family                                                                      | gi1099399_03_gi11673_4835                                                                                                                             | 20,833.10 | 100.00% | 5 | 6 | 8  | 0.08% | 34.40% | LQIWDT<br>AGQESF<br>R                          | 4.48 | 1,550.76 |
| Control | 6018 | RAB2A, member RAS oncogene family                                                                      | gi1099399_03_gi11673_4835                                                                                                                             | 20,833.10 | 100.00% | 5 | 6 | 8  | 0.08% | 34.40% | YIIIGDT<br>GVGK                                | 3.06 | 1,135.64 |
| Control | 6018 | RecName : Full=Phosphoglycerate kinase 1                                                               | gi1088608_85_gi74353_972_gi7773_5551                                                                                                                  | 44,520.20 | 99.80%  | 2 | 2 | 2  | 0.02% | 8.39%  | VDFNVP<br>MKNNQI<br>TNNQR                      | 4.16 | 2,048.00 |
| Control | 6018 | RecName : Full=Phosphoglycerate kinase 1                                                               | gi1088608_85_gi74353_972_gi7773_5551                                                                                                                  | 44,520.20 | 99.80%  | 2 | 2 | 2  | 0.02% | 8.39%  | VLNNME<br>IGTSLFD<br>EEGSK                     | 3.97 | 1,998.93 |
| Control | 6018 | Chain R, Cadmium Ion Binding Structure Of Bovine Heart Cytochrome C Oxidase In The Fully Reduced State | gi1492415_23_gi149241540_gi149241553_gi149241570_gi149241583_gi149241600_gi149241613_gi1492416216_gi1492416872151_gi149241660391934_gi149241681674705 | 16,717.40 | 100.00% | 4 | 5 | 13 | 0.13% | 36.20% | EIYPYVI<br>QELRPTL<br>NELGIST<br>PEELGL<br>DKV | 5.59 | 3,428.82 |
| Control | 6018 | Chain R, Cadmium Ion Binding Structure Of Bovine Heart Cytochrome C Oxidase In The Fully Reduced State | gi1492415_23_gi149241540_gi149241553_gi149241570_gi149241583_gi149241600_gi149241613_gi1492416216_gi1492416872151_gi149241660391934_gi149241681674705 | 16,717.40 | 100.00% | 4 | 5 | 13 | 0.13% | 36.20% | GMNTLV<br>GYDLVP<br>EPK                        | 3.81 | 1,648.83 |
| Control | 6018 | Chain R, Cadmium Ion Binding Structure Of Bovine Heart Cytochrome C Oxidase In The Fully Reduced State | gi1492415_23_gi149241540_gi149241553_gi149241570_gi149241583_gi149241600_gi149241613_gi1492416216_gi1492416872151_gi149241660391934_gi149241681674705 | 16,717.40 | 100.00% | 4 | 5 | 13 | 0.13% | 36.20% | LNDFAS<br>AVR                                  | 3.06 | 992.5159 |

|         |      |                                                                                                                                                                                                                                                                                                      |           |         |   |   |    |       |        |                                                              |      |          |
|---------|------|------------------------------------------------------------------------------------------------------------------------------------------------------------------------------------------------------------------------------------------------------------------------------------------------------|-----------|---------|---|---|----|-------|--------|--------------------------------------------------------------|------|----------|
| Control | 6018 | Chain R, gi 1492415<br>Cadmium 23,gi 14924<br>Ion 1540,gi 149<br>Binding 241553,gi 1<br>Structure 49241570,g<br>Of i 14924158<br>Bovine 3,gi 149241<br>Heart 600,gi 1492<br>Cytochrome C 41613,gi 42<br>Oxidase 564216,gi 5<br>In The 0872151,gi <br>Fully 60391934,g<br>Reduced i 81674705<br>State | 16,717.40 | 100.00% | 4 | 5 | 13 | 0.13% | 36.20% | RLNDFA<br>SAVR                                               | 3.08 | 1,148.62 |
| Control | 6018 | YME1L1 gi 1515571<br>protein 21,gi 15612<br>0349                                                                                                                                                                                                                                                     | 80,044.00 | 100.00% | 5 | 5 | 5  | 0.05% | 14.80% | GTVGFSS<br>GAELN<br>LVNQAA<br>LK                             | 3.5  | 2,018.06 |
| Control | 6018 | YME1L1 gi 1515571<br>protein 21,gi 15612<br>0349                                                                                                                                                                                                                                                     | 80,044.00 | 100.00% | 5 | 5 | 5  | 0.05% | 14.80% | GVEEAK<br>QELQEV<br>VEFLK                                    | 4.02 | 1,975.04 |
| Control | 6018 | YME1L1 gi 1515571<br>protein 21,gi 15612<br>0349                                                                                                                                                                                                                                                     | 80,044.00 | 100.00% | 5 | 5 | 5  | 0.05% | 14.80% | IKFDQSV<br>DPEIAR                                            | 3.13 | 1,630.88 |
| Control | 6018 | YME1L1 gi 1515571<br>protein 21,gi 15612<br>0349                                                                                                                                                                                                                                                     | 80,044.00 | 100.00% | 5 | 5 | 5  | 0.05% | 14.80% | QTINQLL<br>AEMDGF<br>KPNEGVI<br>IIGATNF<br>PEALDN<br>ALIRPGR | 2.88 | 4,352.27 |
| Control | 6018 | YME1L1 gi 1515571<br>protein 21,gi 15612<br>0349                                                                                                                                                                                                                                                     | 80,044.00 | 100.00% | 5 | 5 | 5  | 0.05% | 14.80% | TTTGLD<br>SAVDPV<br>QMK                                      | 4.03 | 1,578.77 |
| Control | 6018 | RecName gi 1221404<br>: 20,gi 74353<br>Full=Vesicle- 894,gi 7773<br>associate<br>d<br>membran<br>e protein<br>8;<br>Short=V<br>AMP-8                                                                                                                                                                 | 11,339.40 | 99.80%  | 2 | 2 | 4  | 0.04% | 14.00% | NKTEDL<br>EATSEHF<br>K                                       | 4.76 | 1,648.78 |
| Control | 6018 | RecName gi 1221404<br>: 20,gi 74353<br>Full=Vesicle- 894,gi 7773<br>associate<br>d<br>membran<br>e protein<br>8;<br>Short=V<br>AMP-8                                                                                                                                                                 | 11,339.40 | 99.80%  | 2 | 2 | 4  | 0.04% | 14.00% | TEDLEA<br>TSEHFK                                             | 2.82 | 1,406.64 |

|         |      |                                                                                                                                                                                                                                                                                                          |                                                                                      |           |         |   |   |   |       |        |                                       |      |          |
|---------|------|----------------------------------------------------------------------------------------------------------------------------------------------------------------------------------------------------------------------------------------------------------------------------------------------------------|--------------------------------------------------------------------------------------|-----------|---------|---|---|---|-------|--------|---------------------------------------|------|----------|
| Control | 6018 | RecName<br>:<br>Full=Ann<br>exin A1;<br>AltName:<br>Full=Ann<br>exin-1;<br>AltName:<br>Full=Ann<br>exin I;<br>AltName:<br>Full=Lip<br>ocortin I;<br>AltName:<br>Full=Cal<br>pactin II;<br>AltName:<br>Full=Chr<br>omobindi<br>n-9;<br>AltName:<br>Full=p35;<br>AltName:<br>Full=Pho<br>spholipas<br>e A2 | gi 1185973<br>73,gi 26418<br>2,gi 615530<br>85,gi 73587<br>269,gi 7385<br>3762,gi 74 | 38,881.20 | 99.80%  | 2 | 2 | 2 | 0.02% | 12.40% | GDRSEE<br>LAVNDD<br>LADSDA<br>R       | 4.84 | 2,047.92 |
| Control | 6018 | RecName<br>:<br>Full=Ann<br>exin A1;<br>AltName:<br>Full=Ann<br>exin-1;<br>AltName:<br>Full=Ann<br>exin I;<br>AltName:<br>Full=Lip<br>ocortin I;<br>AltName:<br>Full=Cal<br>pactin II;<br>AltName:<br>Full=Chr<br>omobindi<br>n-9;<br>AltName:<br>Full=p35;<br>AltName:<br>Full=Pho<br>spholipas<br>e A2 | gi 1185973<br>73,gi 26418<br>2,gi 615530<br>85,gi 73587<br>269,gi 7385<br>3762,gi 74 | 38,881.20 | 99.80%  | 2 | 2 | 2 | 0.02% | 12.40% | GGPGSA<br>VSPYPTF<br>NPSSDV<br>EALHK  | 3.55 | 2,414.16 |
| Control | 6018 | LRRC8C<br>protein                                                                                                                                                                                                                                                                                        | gi 1487452<br>86,gi 14964<br>2813                                                    | 92,305.20 | 100.00% | 6 | 7 | 7 | 0.07% | 12.10% | IPQAVV<br>DVSSHL<br>QK                | 2.35 | 1,520.84 |
| Control | 6018 | LRRC8C<br>protein                                                                                                                                                                                                                                                                                        | gi 1487452<br>86,gi 14964<br>2813                                                    | 92,305.20 | 100.00% | 6 | 7 | 7 | 0.07% | 12.10% | LELPLIM<br>LSGLPDT<br>VFEITEL<br>QSLK | 4.28 | 2,815.54 |
| Control | 6018 | LRRC8C<br>protein                                                                                                                                                                                                                                                                                        | gi 1487452<br>86,gi 14964<br>2813                                                    | 92,305.20 | 100.00% | 6 | 7 | 7 | 0.07% | 12.10% | NLEELY<br>LVGSL<br>HDIR               | 2.9  | 1,945.00 |
| Control | 6018 | LRRC8C<br>protein                                                                                                                                                                                                                                                                                        | gi 1487452<br>86,gi 14964<br>2813                                                    | 92,305.20 | 100.00% | 6 | 7 | 7 | 0.07% | 12.10% | QETGID<br>DIPDVK                      | 3.05 | 1,329.65 |
| Control | 6018 | LRRC8C<br>protein                                                                                                                                                                                                                                                                                        | gi 1487452<br>86,gi 14964<br>2813                                                    | 92,305.20 | 100.00% | 6 | 7 | 7 | 0.07% | 12.10% | SNTTQS<br>GPEGSL<br>VNSQSL<br>K       | 4.92 | 1,933.95 |

|         |      |                                                                                                                                                                             |                                      |            |         |   |   |   |       |        |                |      |          |
|---------|------|-----------------------------------------------------------------------------------------------------------------------------------------------------------------------------|--------------------------------------|------------|---------|---|---|---|-------|--------|----------------|------|----------|
| Control | 6018 | LRRRC8C protein                                                                                                                                                             | gi 148745286,gi 149642813            | 92,305.20  | 100.00% | 6 | 7 | 7 | 0.07% | 12.10% | YLDLSY NDIR    | 2.62 | 1,271.63 |
| Control | 6018 | PREDICTED: similar to MYB binding protein 1a                                                                                                                                | gi 119911777                         | 151,796.60 | 99.80%  | 2 | 2 | 2 | 0.02% | 1.92%  | DLAALE LLNTLFR | 2.76 | 1,488.84 |
| Control | 6018 | PREDICTED: similar to MYB binding protein 1a                                                                                                                                | gi 119911777                         | 151,796.60 | 99.80%  | 2 | 2 | 2 | 0.02% | 1.92%  | NVAPLT AFTTQQR | 3.56 | 1,446.77 |
| Control | 6018 | RecName: Full=Transitional endoplasmic reticulum ATPase; Short=TER ATPase; AltName: Full=15S Mg(2+)-ATPase p97 subunit; AltName: Full=Valosin-containing protein; Short=VCP | gi 122140828,gi 73586667,gi 77735541 | 89,314.70  | 100.00% | 3 | 3 | 3 | 0.03% | 5.21%  | GILLYGP PGTGK  | 2.66 | 1,172.67 |
| Control | 6018 | RecName: Full=Transitional endoplasmic reticulum ATPase; Short=TER ATPase; AltName: Full=15S Mg(2+)-ATPase p97 subunit; AltName: Full=Valosin-containing protein; Short=VCP | gi 122140828,gi 73586667,gi 77735541 | 89,314.70  | 100.00% | 3 | 3 | 3 | 0.03% | 5.21%  | LDQLIYI PLPDEK | 3.03 | 1,556.86 |

|         |      |                                                                                                                                                                                                |                      |         |   |   |   |       |       |                           |      |          |
|---------|------|------------------------------------------------------------------------------------------------------------------------------------------------------------------------------------------------|----------------------|---------|---|---|---|-------|-------|---------------------------|------|----------|
| Control | 6018 | RecName gi 1221408 :<br>Full=Transitional endoplasmic reticulum ATPase; Short=TE R<br>ATPase; AltName: Full=15S Mg(2+)-ATPase p97 subunit; AltName: Full=Valosin-containing protein; Short=VCP | 89,314.70            | 100.00% | 3 | 3 | 3 | 0.03% | 5.21% | NAPAIIFI<br>DELDAIA<br>PK | 2.98 | 1,811.00 |
| Control | 6018 | PREDIC TED: similar to Thioredoxin domain-containing protein 5 precursor (Thioredoxin-like protein p46) (Endoplasmic reticulum protein ERp46) isoform 1                                        | gi 1199159 45,792.10 | 99.80%  | 2 | 2 | 4 | 0.04% | 4.55% | FFKPGQ<br>EAVK            | 2.38 | 1,150.63 |
| Control | 6018 | PREDIC TED: similar to Thioredoxin domain-containing protein 5 precursor (Thioredoxin-like protein p46) (Endoplasmic reticulum protein ERp46) isoform 1                                        | gi 1199159 45,792.10 | 99.80%  | 2 | 2 | 4 | 0.04% | 4.55% | GYPTLL<br>LFR             | 2.43 | 1,079.62 |









|         |      |                                                                                                                                                                                                                                                 |            |           |         |   |   |    |       |        |                                                 |      |          |
|---------|------|-------------------------------------------------------------------------------------------------------------------------------------------------------------------------------------------------------------------------------------------------|------------|-----------|---------|---|---|----|-------|--------|-------------------------------------------------|------|----------|
| Control | 6018 | RecName<br>:<br>Full=Seri<br>ne<br>hydroxy<br>methyltra<br>nsferase,<br>mitochon<br>drial;<br>Short=S<br>HMT;<br>Short=Se<br>rine<br>methylas<br>e;<br>AltName:<br>Full=Gly<br>cine<br>hydroxy<br>methyltra<br>nsferase;<br>Flags:<br>Precursor | gi 1089359 | 55,589.20 | 100.00% | 3 | 3 | 3  | 0.03% | 7.74%  | VLELVSI<br>TANK                                 | 3.42 | 1,186.70 |
| Control | 6018 | Transloca<br>se of<br>outer<br>mitochon<br>drial<br>membran<br>e 70<br>homolog<br>A (S.<br>cerevisiae<br>)                                                                                                                                      | gi 1153050 | 67,553.40 | 100.00% | 8 | 9 | 10 | 0.10% | 20.90% | ASPAPGS<br>GHPDGP<br>GTHLEM<br>NSLDR            | 2.59 | 2,416.10 |
| Control | 6018 | Transloca<br>se of<br>outer<br>mitochon<br>drial<br>membran<br>e 70<br>homolog<br>A (S.<br>cerevisiae<br>)                                                                                                                                      | gi 1153050 | 67,553.40 | 100.00% | 8 | 9 | 10 | 0.10% | 20.90% | LDNKKE<br>CLELVT<br>AVCILEG<br>FQNQQS<br>MLLADK | 4.31 | 3,511.71 |
| Control | 6018 | Transloca<br>se of<br>outer<br>mitochon<br>drial<br>membran<br>e 70<br>homolog<br>A (S.<br>cerevisiae<br>)                                                                                                                                      | gi 1153050 | 67,553.40 | 100.00% | 8 | 9 | 10 | 0.10% | 20.90% | LRPESAL<br>AQAQK                                | 3.18 | 1,311.74 |
| Control | 6018 | Transloca<br>se of<br>outer<br>mitochon<br>drial<br>membran<br>e 70<br>homolog<br>A (S.<br>cerevisiae<br>)                                                                                                                                      | gi 1153050 | 67,553.40 | 100.00% | 8 | 9 | 10 | 0.10% | 20.90% | NVDLST<br>FYQNR                                 | 4.2  | 1,356.65 |

|         |      |                                                                          |                                      |           |         |   |   |    |       |        |                            |      |          |
|---------|------|--------------------------------------------------------------------------|--------------------------------------|-----------|---------|---|---|----|-------|--------|----------------------------|------|----------|
| Control | 6018 | Translocase of outer mitochondrial membrane 70 homolog A (S. cerevisiae) | gi 115305042,gi 115496634            | 67,553.40 | 100.00% | 8 | 9 | 10 | 0.10% | 20.90% | SDEKDK KEGEAL EVK          | 3.89 | 1,691.80 |
| Control | 6018 | Translocase of outer mitochondrial membrane 70 homolog A (S. cerevisiae) | gi 115305042,gi 115496634            | 67,553.40 | 100.00% | 8 | 9 | 10 | 0.10% | 20.90% | SYFSSFT DDII SQP MLK       | 2.45 | 1,994.94 |
| Control | 6018 | Translocase of outer mitochondrial membrane 70 homolog A (S. cerevisiae) | gi 115305042,gi 115496634            | 67,553.40 | 100.00% | 8 | 9 | 10 | 0.10% | 20.90% | YGLKPP TL                  | 2.2  | 888.5191 |
| Control | 6018 | Translocase of outer mitochondrial membrane 70 homolog A (S. cerevisiae) | gi 115305042,gi 115496634            | 67,553.40 | 100.00% | 8 | 9 | 10 | 0.10% | 20.90% | YMAEAL LLR                 | 2.37 | 1,095.59 |
| Control | 6018 | RecName : Full=Pro bable saccharopine dehydrogenase                      | gi 122140337,gi 74354153,gi 77735529 | 47,302.40 | 99.80%  | 2 | 2 | 2  | 0.02% | 9.09%  | GVYIIGS SGFDSIP ADLGVI YTR | 3.21 | 2,400.24 |
| Control | 6018 | RecName : Full=Pro bable saccharopine dehydrogenase                      | gi 122140337,gi 74354153,gi 77735529 | 47,302.40 | 99.80%  | 2 | 2 | 2  | 0.02% | 9.09%  | LRNESD MKPVPI VGPK         | 3    | 1,795.97 |
| Control | 6018 | lysosomal associated membrane protein 2 isoform 1                        | gi 164420738,gi 74353978,gi 77736087 | 44,524.90 | 100.00% | 4 | 4 | 9  | 0.09% | 7.62%  | IPLNDIF R                  | 2.92 | 987.5623 |

|         |      |                                                                        |                                                                 |           |         |   |   |   |       |        |                                                |      |          |
|---------|------|------------------------------------------------------------------------|-----------------------------------------------------------------|-----------|---------|---|---|---|-------|--------|------------------------------------------------|------|----------|
| Control | 6018 | lysosomal<br>l-<br>associated<br>membrane<br>protein<br>2 isoform<br>1 | gi 1644207<br>38,gi 74353<br>978,gi 7773<br>6087                | 44,524.90 | 100.00% | 4 | 4 | 9 | 0.09% | 7.62%  | VALKIPL<br>NDIFR                               | 3.46 | 1,398.85 |
| Control | 6018 | lysosomal<br>l-<br>associated<br>membrane<br>protein<br>2 isoform<br>1 | gi 1644207<br>38,gi 74353<br>978,gi 7773<br>6087                | 44,524.90 | 100.00% | 4 | 4 | 9 | 0.09% | 7.62%  | VQPFSV<br>TEGK                                 | 1.97 | 1,091.57 |
| Control | 6018 | lysosomal<br>l-<br>associated<br>membrane<br>protein<br>2 isoform<br>1 | gi 1644207<br>38,gi 74353<br>978,gi 7773<br>6087                | 44,524.90 | 100.00% | 4 | 4 | 9 | 0.09% | 7.62%  | YLDFVF<br>AVK                                  | 2.6  | 1,101.60 |
| Control | 6018 | RPL13<br>protein-<br>like                                              | gi 5876038<br>8,gi 627516<br>46,gi 74267<br>768,gi 7506<br>0396 | 33,783.70 | 99.90%  | 2 | 2 | 2 | 0.02% | 7.82%  | LATQLT<br>GPVMPI<br>R                          | 3.19 | 1,412.79 |
| Control | 6018 | RPL13<br>protein-<br>like                                              | gi 5876038<br>8,gi 627516<br>46,gi 74267<br>768,gi 7506<br>0396 | 33,783.70 | 99.90%  | 2 | 2 | 2 | 0.02% | 7.82%  | VITEEEK<br>NFK                                 | 3.07 | 1,236.65 |
| Control | 6018 | syndecan<br>binding<br>protein<br>(syntenin<br>)                       | gi 1154975<br>76,gi 14623<br>1800,gi 742<br>67862               | 32,372.10 | 99.80%  | 2 | 2 | 2 | 0.02% | 17.80% | DSQIADI<br>LSTAGNI<br>VTITIMP<br>AFIFEHII<br>K | 4.16 | 3,287.76 |
| Control | 6018 | syndecan<br>binding<br>protein<br>(syntenin<br>)                       | gi 1154975<br>76,gi 14623<br>1800,gi 742<br>67862               | 32,372.10 | 99.80%  | 2 | 2 | 2 | 0.02% | 17.80% | SIDNGIF<br>VQLVQA<br>NSPSSLV<br>GLR            | 3.61 | 2,414.30 |
| Control | 6018 | Nicastrin                                                              | gi 7426760<br>0,gi 777359<br>01                                 | 79,055.00 | 99.80%  | 2 | 2 | 3 | 0.03% | 2.65%  | ALAGVA<br>TVLAR                                | 3.22 | 1,041.64 |
| Control | 6018 | Nicastrin                                                              | gi 7426760<br>0,gi 777359<br>01                                 | 79,055.00 | 99.80%  | 2 | 2 | 3 | 0.03% | 2.65%  | LLYGFL<br>VR                                   | 2.54 | 980.5928 |
| Control | 6018 | ribosomal<br>protein<br>S13-like                                       | gi 5876041<br>5,gi 707787<br>78,gi 74267<br>772,gi 7506<br>0393 | 17,205.30 | 99.90%  | 2 | 2 | 2 | 0.02% | 16.60% | KGLTPS<br>QIGVILR                              | 3.94 | 1,381.85 |
| Control | 6018 | ribosomal<br>protein<br>S13-like                                       | gi 5876041<br>5,gi 707787<br>78,gi 74267<br>772,gi 7506<br>0393 | 17,205.30 | 99.90%  | 2 | 2 | 2 | 0.02% | 16.60% | LTSDDV<br>KEQIYK                               | 3.91 | 1,438.74 |





|         |      |                                                   |            |            |         |    |    |    |       |        |                                     |      |          |
|---------|------|---------------------------------------------------|------------|------------|---------|----|----|----|-------|--------|-------------------------------------|------|----------|
| Control | 6018 | PREDIC TED: 41<br>similar to myoferlin isoform 12 | gi 1946789 | 234,648.00 | 100.00% | 24 | 29 | 36 | 0.35% | 17.40% | IYRAEDI<br>PQMDDA<br>FSQTVK         | 3.34 | 2,243.07 |
| Control | 6018 | PREDIC TED: 41<br>similar to myoferlin isoform 12 | gi 1946789 | 234,648.00 | 100.00% | 24 | 29 | 36 | 0.35% | 17.40% | LDAVNT<br>LLVMAE<br>R               | 3.05 | 1,460.78 |
| Control | 6018 | PREDIC TED: 41<br>similar to myoferlin isoform 12 | gi 1946789 | 234,648.00 | 100.00% | 24 | 29 | 36 | 0.35% | 17.40% | MAPSET<br>HGAAAI<br>FK              | 4.44 | 1,446.70 |
| Control | 6018 | PREDIC TED: 41<br>similar to myoferlin isoform 12 | gi 1946789 | 234,648.00 | 100.00% | 24 | 29 | 36 | 0.35% | 17.40% | NDVVGT<br>TYLHLS<br>K               | 3.47 | 1,446.76 |
| Control | 6018 | PREDIC TED: 41<br>similar to myoferlin isoform 12 | gi 1946789 | 234,648.00 | 100.00% | 24 | 29 | 36 | 0.35% | 17.40% | SDENED<br>PSVUGE<br>FK              | 3.74 | 1,551.68 |
| Control | 6018 | PREDIC TED: 41<br>similar to myoferlin isoform 12 | gi 1946789 | 234,648.00 | 100.00% | 24 | 29 | 36 | 0.35% | 17.40% | LLLTEA<br>DAGHTE<br>FTDEVY<br>QNESR | 5.94 | 2,612.17 |
| Control | 6018 | PREDIC TED: 41<br>similar to myoferlin isoform 12 | gi 1946789 | 234,648.00 | 100.00% | 24 | 29 | 36 | 0.35% | 17.40% | TLHSSFQ<br>PNISQGR                  | 3.66 | 1,571.79 |
| Control | 6018 | PREDIC TED: 41<br>similar to myoferlin isoform 12 | gi 1946789 | 234,648.00 | 100.00% | 24 | 29 | 36 | 0.35% | 17.40% | TQGLVP<br>EHVETR                    | 3.8  | 1,365.71 |
| Control | 6018 | PREDIC TED: 41<br>similar to myoferlin isoform 12 | gi 1946789 | 234,648.00 | 100.00% | 24 | 29 | 36 | 0.35% | 17.40% | VENTLE<br>VLNEKE<br>ADERPA<br>GK    | 3.54 | 2,274.13 |
| Control | 6018 | PREDIC TED: 41<br>similar to myoferlin isoform 12 | gi 1946789 | 234,648.00 | 100.00% | 24 | 29 | 36 | 0.35% | 17.40% | VFLPKEE<br>LYMPPL<br>VIK            | 3.12 | 1,932.09 |
| Control | 6018 | PREDIC TED: 41<br>similar to myoferlin isoform 12 | gi 1946789 | 234,648.00 | 100.00% | 24 | 29 | 36 | 0.35% | 17.40% | VGETIID<br>LENR                     | 3.18 | 1,258.66 |

|         |      |                                                                          |                                          |            |         |    |    |    |       |        |                                                       |      |          |
|---------|------|--------------------------------------------------------------------------|------------------------------------------|------------|---------|----|----|----|-------|--------|-------------------------------------------------------|------|----------|
| Control | 6018 | PREDIC TED: 41<br>similar to myoferlin isoform 12                        | gi 1946789                               | 234,648.00 | 100.00% | 24 | 29 | 36 | 0.35% | 17.40% | VIEDRD<br>NYIPNTL<br>NPVFGR                           | 3.76 | 2,232.14 |
| Control | 6018 | PREDIC TED: 41<br>similar to myoferlin isoform 12                        | gi 1946789                               | 234,648.00 | 100.00% | 24 | 29 | 36 | 0.35% | 17.40% | VIIEFLD<br>NDQVGK<br>DEFLGR                           | 5.73 | 2,207.13 |
| Control | 6018 | PREDIC TED: 41<br>similar to myoferlin isoform 12                        | gi 1946789                               | 234,648.00 | 100.00% | 24 | 29 | 36 | 0.35% | 17.40% | VIVESAS<br>NIPK                                       | 3.02 | 1,156.66 |
| Control | 6018 | TXNDC1 3 protein                                                         | gi 1488784<br>48,gi 149642897            | 38,865.40  | 100.00% | 3  | 3  | 3  | 0.03% | 12.10% | FFVTTLP<br>AFFHAK                                     | 3.04 | 1,525.82 |
| Control | 6018 | TXNDC1 3 protein                                                         | gi 1488784<br>48,gi 149642897            | 38,865.40  | 100.00% | 3  | 3  | 3  | 0.03% | 12.10% | VDVIQEP<br>GLSGR                                      | 3.21 | 1,269.68 |
| Control | 6018 | TXNDC1 3 protein                                                         | gi 1488784<br>48,gi 149642897            | 38,865.40  | 100.00% | 3  | 3  | 3  | 0.03% | 12.10% | YRPGV<br>YEDLQN<br>YILEK                              | 3.4  | 2,057.03 |
| Control | 6018 | OClA domain containin g 1                                                | gi 5985850<br>9,gi 62751843,gi 75040205  | 27,811.90  | 100.00% | 4  | 4  | 5  | 0.05% | 24.30% | ADFREP<br>NAEVPR<br>PIPHIGA<br>DYIPTEE<br>ER          | 3.44 | 3,218.59 |
| Control | 6018 | OClA domain containin g 1                                                | gi 5985850<br>9,gi 62751843,gi 75040205  | 27,811.90  | 100.00% | 4  | 4  | 5  | 0.05% | 24.30% | FKNLEN<br>SPLGEAL<br>R                                | 2.84 | 1,587.85 |
| Control | 6018 | OClA domain containin g 1                                                | gi 5985850<br>9,gi 62751843,gi 75040205  | 27,811.90  | 100.00% | 4  | 4  | 5  | 0.05% | 24.30% | NLENSPL<br>GEALR                                      | 3.37 | 1,312.69 |
| Control | 6018 | OClA domain containin g 1                                                | gi 5985850<br>9,gi 62751843,gi 75040205  | 27,811.90  | 100.00% | 4  | 4  | 5  | 0.05% | 24.30% | SVPLAA<br>TSMLITQ<br>GLISK                            | 3.89 | 1,846.04 |
| Control | 6018 | RecName : Full=Heterogeneo us nuclear ribonucleoprotein K; Short=hnRNP K | gi 1088607<br>77,gi 74354615,gi 77736071 | 51,003.40  | 100.00% | 5  | 5  | 6  | 0.06% | 16.60% | IDEPLEG<br>SEDRIIT<br>TGTQDQ<br>IQNAQY<br>LLQNSV<br>K | 5.59 | 3,829.95 |
| Control | 6018 | RecName : Full=Heterogeneo us nuclear ribonucleoprotein K; Short=hnRNP K | gi 1088607<br>77,gi 74354615,gi 77736071 | 51,003.40  | 100.00% | 5  | 5  | 6  | 0.06% | 16.60% | IILDLISE<br>SPIK                                      | 3.2  | 1,340.80 |

|         |      |                                                                                                           |                                                   |           |         |    |    |    |       |        |                                                              |          |
|---------|------|-----------------------------------------------------------------------------------------------------------|---------------------------------------------------|-----------|---------|----|----|----|-------|--------|--------------------------------------------------------------|----------|
| Control | 6018 | RecName<br>:<br>Full=Het<br>erogeneo<br>us<br>nuclear<br>ribonucle<br>oprotein<br>K;<br>Short=hn<br>RNP K | gi 1088607<br>77,gi 74354<br>615,gi 7773<br>6071  | 51,003.40 | 100.00% | 5  | 5  | 6  | 0.06% | 16.60% | ITITGTQ 5.08<br>DQIQNA<br>QYLLQN<br>SVK                      | 2,589.39 |
| Control | 6018 | RecName<br>:<br>Full=Het<br>erogeneo<br>us<br>nuclear<br>ribonucle<br>oprotein<br>K;<br>Short=hn<br>RNP K | gi 1088607<br>77,gi 74354<br>615,gi 7773<br>6071  | 51,003.40 | 100.00% | 5  | 5  | 6  | 0.06% | 16.60% | RPAEDM 3.84<br>EEEQAF<br>KR                                  | 1,751.80 |
| Control | 6018 | RecName<br>:<br>Full=Het<br>erogeneo<br>us<br>nuclear<br>ribonucle<br>oprotein<br>K;<br>Short=hn<br>RNP K | gi 1088607<br>77,gi 74354<br>615,gi 7773<br>6071  | 51,003.40 | 100.00% | 5  | 5  | 6  | 0.06% | 16.60% | TDYNAS 3.32<br>VSVPDS<br>SGPER                               | 1,780.80 |
| Control | 6018 | RecName<br>:<br>Full=Dna<br>J<br>homolog<br>subfamily<br>C<br>member<br>11                                | gi 1108081<br>98,gi 11405<br>0887,gi 847<br>08894 | 63,220.40 | 100.00% | 3  | 3  | 3  | 0.03% | 12.20% | GTISVGI 4.38<br>DATDLF<br>DRYEEE<br>YEDVSG<br>SGFPQIEI<br>NK | 3,893.82 |
| Control | 6018 | RecName<br>:<br>Full=Dna<br>J<br>homolog<br>subfamily<br>C<br>member<br>11                                | gi 1108081<br>98,gi 11405<br>0887,gi 847<br>08894 | 63,220.40 | 100.00% | 3  | 3  | 3  | 0.03% | 12.20% | GVLHQV 3.7<br>MALDSE<br>ALR                                  | 1,654.86 |
| Control | 6018 | RecName<br>:<br>Full=Dna<br>J<br>homolog<br>subfamily<br>C<br>member<br>11                                | gi 1108081<br>98,gi 11405<br>0887,gi 847<br>08894 | 63,220.40 | 100.00% | 3  | 3  | 3  | 0.03% | 12.20% | LFNLVH 3.41<br>QAYEVL<br>SDPQTR                              | 2,130.10 |
| Control | 6018 | vascular<br>endotheli<br>al<br>cadherin<br>precursor                                                      | gi 3430529<br>9,gi 486753<br>81,gi 75071<br>940   | 87,450.60 | 100.00% | 12 | 15 | 17 | 0.17% | 15.60% | FKMLAE 3.01<br>LYGSDP<br>QEELVY                              | 2,148.02 |



|         |      |                                                      |                                                 |           |         |    |    |    |       |        |                                  |      |          |
|---------|------|------------------------------------------------------|-------------------------------------------------|-----------|---------|----|----|----|-------|--------|----------------------------------|------|----------|
| Control | 6018 | vascular<br>endotheli<br>al<br>cadherin<br>precursor | gi 3430529<br>9,gi 486753<br>81,gi 75071<br>940 | 87,450.60 | 100.00% | 12 | 15 | 17 | 0.17% | 15.60% | KPLIGSV<br>LAK                   | 2.55 | 1,025.67 |
| Control | 6018 | vascular<br>endotheli<br>al<br>cadherin<br>precursor | gi 3430529<br>9,gi 486753<br>81,gi 75071<br>940 | 87,450.60 | 100.00% | 12 | 15 | 17 | 0.17% | 15.60% | KPLIGSV<br>LAKDPD<br>AAQR        | 3.82 | 1,779.01 |
| Control | 6018 | vascular<br>endotheli<br>al<br>cadherin<br>precursor | gi 3430529<br>9,gi 486753<br>81,gi 75071<br>940 | 87,450.60 | 100.00% | 12 | 15 | 17 | 0.17% | 15.60% | MLAELY<br>GSDPQE<br>ELVY         | 1.77 | 1,872.86 |
| Control | 6018 | vascular<br>endotheli<br>al<br>cadherin<br>precursor | gi 3430529<br>9,gi 486753<br>81,gi 75071<br>940 | 87,450.60 | 100.00% | 12 | 15 | 17 | 0.17% | 15.60% | NLESPSS<br>FTIK                  | 2.38 | 1,222.63 |
| Control | 6018 | vascular<br>endotheli<br>al<br>cadherin<br>precursor | gi 3430529<br>9,gi 486753<br>81,gi 75071<br>940 | 87,450.60 | 100.00% | 12 | 15 | 17 | 0.17% | 15.60% | PSLYAQ<br>VQKPPR                 | 2.43 | 1,383.77 |
| Control | 6018 | vascular<br>endotheli<br>al<br>cadherin<br>precursor | gi 3430529<br>9,gi 486753<br>81,gi 75071<br>940 | 87,450.60 | 100.00% | 12 | 15 | 17 | 0.17% | 15.60% | TSDKGQ<br>FFGITK                 | 2.45 | 1,328.68 |
| Control | 6018 | vascular<br>endotheli<br>al<br>cadherin<br>precursor | gi 3430529<br>9,gi 486753<br>81,gi 75071<br>940 | 87,450.60 | 100.00% | 12 | 15 | 17 | 0.17% | 15.60% | VDKNTG<br>DVYALE<br>R            | 4.26 | 1,479.74 |
| Control | 6018 | vascular<br>endotheli<br>al<br>cadherin<br>precursor | gi 3430529<br>9,gi 486753<br>81,gi 75071<br>940 | 87,450.60 | 100.00% | 12 | 15 | 17 | 0.17% | 15.60% | VGSPLG<br>SLFVEDP<br>DEPQNR      | 2.23 | 2,056.00 |
| Control | 6018 | vascular<br>endotheli<br>al<br>cadherin<br>precursor | gi 3430529<br>9,gi 486753<br>81,gi 75071<br>940 | 87,450.60 | 100.00% | 12 | 15 | 17 | 0.17% | 15.60% | VGSPLG<br>SLFVEDP<br>DEPQNR<br>K | 2.69 | 2,184.09 |
| Control | 6018 | vascular<br>endotheli<br>al<br>cadherin<br>precursor | gi 3430529<br>9,gi 486753<br>81,gi 75071<br>940 | 87,450.60 | 100.00% | 12 | 15 | 17 | 0.17% | 15.60% | YSFVQG<br>EYR                    | 2.71 | 1,148.54 |
| Control | 6018 | vascular<br>endotheli<br>al<br>cadherin<br>precursor | gi 3430529<br>9,gi 486753<br>81,gi 75071<br>940 | 87,450.60 | 100.00% | 12 | 15 | 17 | 0.17% | 15.60% | YTFSVPE<br>DIR                   | 3.14 | 1,226.61 |

|         |      |                                                                                                                                                                                                                                                                                       |                                                  |           |         |   |   |   |       |        |                                                   |          |
|---------|------|---------------------------------------------------------------------------------------------------------------------------------------------------------------------------------------------------------------------------------------------------------------------------------------|--------------------------------------------------|-----------|---------|---|---|---|-------|--------|---------------------------------------------------|----------|
| Control | 6018 | RecName<br>:<br>Full=Alp<br>ha-<br>enolase;<br>AltName:<br>Full=2-<br>phospho-<br>D-<br>glycerate<br>hydro-<br>lyase;<br>AltName:<br>Full=Non-<br>neural<br>enolase;<br>Short=N<br>NE;<br>AltName:<br>Full=Eno-<br>lase 1;<br>AltName:<br>Full=Pho-<br>sphopyru-<br>vate<br>hydratase | gi 1099400<br>77,gi 74354<br>056,gi 8719<br>6501 | 47,309.10 | 99.80%  | 2 | 2 | 2 | 0.02% | 7.60%  | DATNVG 5.4<br>DEGGFA<br>PNILENK                   | 1,960.92 |
| Control | 6018 | RecName<br>:<br>Full=Alp<br>ha-<br>enolase;<br>AltName:<br>Full=2-<br>phospho-<br>D-<br>glycerate<br>hydro-<br>lyase;<br>AltName:<br>Full=Non-<br>neural<br>enolase;<br>Short=N<br>NE;<br>AltName:<br>Full=Eno-<br>lase 1;<br>AltName:<br>Full=Pho-<br>sphopyru-<br>vate<br>hydratase | gi 1099400<br>77,gi 74354<br>056,gi 8719<br>6501 | 47,309.10 | 99.80%  | 2 | 2 | 2 | 0.02% | 7.60%  | VVIGMD 3.66<br>VAASEF<br>YR                       | 1,572.77 |
| Control | 6018 | LOC515<br>309<br>protein                                                                                                                                                                                                                                                              | gi 1488784<br>60,gi 14977<br>3584                | 31,548.40 | 100.00% | 3 | 4 | 4 | 0.04% | 15.20% | FAEVYF 3.43<br>AQSQQK                             | 1,445.71 |
| Control | 6018 | LOC515<br>309<br>protein                                                                                                                                                                                                                                                              | gi 1488784<br>60,gi 14977<br>3584                | 31,548.40 | 100.00% | 3 | 4 | 4 | 0.04% | 15.20% | KEEEEE 5.99<br>EEYDEG<br>SNLKR                    | 2,241.96 |
| Control | 6018 | LOC515<br>309<br>protein                                                                                                                                                                                                                                                              | gi 1488784<br>60,gi 14977<br>3584                | 31,548.40 | 100.00% | 3 | 4 | 4 | 0.04% | 15.20% | SNPEDQI 3.75<br>LYQTER                            | 1,592.76 |
| Control | 6018 | PREDIC<br>TED:<br>lamin B2                                                                                                                                                                                                                                                            | gi 1946688<br>43                                 | 70,532.10 | 99.80%  | 2 | 2 | 2 | 0.02% | 6.69%  | ETENGE 2.97<br>EGEDEA<br>AEFGEE<br>DLFHQQ<br>GDPR | 3,164.28 |
| Control | 6018 | PREDIC<br>TED:<br>lamin B2                                                                                                                                                                                                                                                            | gi 1946688<br>43                                 | 70,532.10 | 99.80%  | 2 | 2 | 2 | 0.02% | 6.69%  | TTLVNA 4.18<br>DGEEVA<br>MR                       | 1,521.72 |

|         |      |                                                            |                                        |           |         |   |   |   |       |        |                                               |      |          |
|---------|------|------------------------------------------------------------|----------------------------------------|-----------|---------|---|---|---|-------|--------|-----------------------------------------------|------|----------|
| Control | 6018 | SCO cytochrome oxidase deficient homolog 1 (yeast)         | gi 119223914,gi 122692513,gi 134035032 | 33,641.50 | 99.80%  | 2 | 3 | 3 | 0.03% | 12.10% | LIGLTGT<br>KEEIDQ<br>VAR                      | 4.64 | 1,742.97 |
| Control | 6018 | SCO cytochrome oxidase deficient homolog 1 (yeast)         | gi 119223914,gi 122692513,gi 134035032 | 33,641.50 | 99.80%  | 2 | 3 | 3 | 0.03% | 12.10% | SIGKPLL<br>GGPFSLT<br>THTGEP<br>K             | 3.24 | 2,137.17 |
| Control | 6018 | LMAN1 protein                                              | gi 148744096,gi 149773586              | 58,038.50 | 100.00% | 4 | 4 | 5 | 0.05% | 10.40% | GAGAPG<br>QQGQTF<br>QQELDT<br>VVNTQH<br>EILR  | 2.55 | 3,022.50 |
| Control | 6018 | LMAN1 protein                                              | gi 148744096,gi 149773586              | 58,038.50 | 100.00% | 4 | 4 | 5 | 0.05% | 10.40% | RGAGAP<br>GQQGQT<br>FQQELD<br>TVVNTQ<br>HEILR | 3.46 | 3,178.60 |
| Control | 6018 | LMAN1 protein                                              | gi 148744096,gi 149773586              | 58,038.50 | 100.00% | 4 | 4 | 5 | 0.05% | 10.40% | YQE EFE<br>HFQQEL<br>DK                       | 3.88 | 1,869.83 |
| Control | 6018 | LMAN1 protein                                              | gi 148744096,gi 149773586              | 58,038.50 | 100.00% | 4 | 4 | 5 | 0.05% | 10.40% | YVSSLT<br>EEISK                               | 3.52 | 1,255.64 |
| Control | 6018 | acyl-CoA synthetase long-chain family member 5             | gi 115497154,gi 152941112,gi 94534758  | 76,013.10 | 100.00% | 3 | 3 | 3 | 0.03% | 5.86%  | ALVLISN<br>VEK                                | 2.78 | 1,085.66 |
| Control | 6018 | acyl-CoA synthetase long-chain family member 5             | gi 115497154,gi 152941112,gi 94534758  | 76,013.10 | 100.00% | 3 | 3 | 3 | 0.03% | 5.86%  | GAMLTH<br>ANIVSN<br>ASGFLK                    | 2.95 | 1,846.95 |
| Control | 6018 | acyl-CoA synthetase long-chain family member 5             | gi 115497154,gi 152941112,gi 94534758  | 76,013.10 | 100.00% | 3 | 3 | 3 | 0.03% | 5.86%  | TLKPTLF<br>PTVPR                              | 2.17 | 1,369.82 |
| Control | 6018 | PREDICTED: similar to ER lipid raft associated 1 isoform 2 | gi 194678978                           | 39,049.70 | 99.80%  | 2 | 2 | 2 | 0.02% | 11.80% | DLNVMA<br>PGLTIQA<br>VR                       | 3.6  | 1,613.87 |
| Control | 6018 | PREDICTED: similar to ER lipid raft associated 1 isoform 2 | gi 194678978                           | 39,049.70 | 99.80%  | 2 | 2 | 2 | 0.02% | 11.80% | EALEPSG<br>ESPIQNK                            | 4.18 | 1,498.74 |

|         |      |                                                                         |                                                    |            |         |   |   |   |       |        |                                                                    |      |          |
|---------|------|-------------------------------------------------------------------------|----------------------------------------------------|------------|---------|---|---|---|-------|--------|--------------------------------------------------------------------|------|----------|
| Control | 6018 | PREDICTED:<br>similar to<br>ER lipid<br>raft<br>associated<br>isoform 2 | gi 194678978                                       | 39,049.70  | 99.80%  | 2 | 2 | 2 | 0.02% | 11.80% | SVQTTL<br>QTDEVK                                                   | 2.82 | 1,348.70 |
| Control | 6018 | transporter 2, ATP-binding cassette, sub-family B                       | gi 114051053,gi 19171652,gi 27806345,gi 63169160   | 79,287.60  | 100.00% | 3 | 4 | 6 | 0.06% | 10.20% | LQTVQS<br>ADQVLV<br>LR                                             | 4.74 | 1,569.90 |
| Control | 6018 | transporter 2, ATP-binding cassette, sub-family B                       | gi 114051053,gi 19171652,gi 27806345,gi 63169160   | 79,287.60  | 100.00% | 3 | 4 | 6 | 0.06% | 10.20% | QVVLVG<br>QEPVLFS<br>GSVR                                          | 5.25 | 1,814.02 |
| Control | 6018 | transporter 2, ATP-binding cassette, sub-family B                       | gi 114051053,gi 19171652,gi 27806345,gi 63169160   | 79,287.60  | 100.00% | 3 | 4 | 6 | 0.06% | 10.20% | VNFQNV<br>SFAYPSR<br>PDQPAL<br>QGLTFT<br>LSPGQM<br>TALVGP<br>NGSGK | 3.58 | 4,408.20 |
| Control | 6018 | PREDICTED:<br>similar to<br>rearranged L-myc<br>fusion                  | gi 119920765                                       | 217,470.40 | 99.80%  | 2 | 2 | 2 | 0.02% | 1.83%  | EKCSNV<br>AVCFDG<br>TK                                             | 2.96 | 1,500.68 |
| Control | 6018 | PREDICTED:<br>similar to<br>rearranged L-myc<br>fusion                  | gi 119920765                                       | 217,470.40 | 99.80%  | 2 | 2 | 2 | 0.02% | 1.83%  | NSITHGS<br>FSGSLQ<br>GYPSSG<br>AK                                  | 1.75 | 2,081.99 |
| Control | 6018 | ATP synthase, H+ transporting, mitochondrial F0 complex, subunit F2     | gi 165973956,gi 2493087,gi 81294315                | 10,254.50  | 99.80%  | 2 | 3 | 5 | 0.05% | 27.30% | DFTPSGI<br>AGAFQR                                                  | 3.71 | 1,366.68 |
| Control | 6018 | ATP synthase, H+ transporting, mitochondrial F0 complex, subunit F2     | gi 165973956,gi 2493087,gi 81294315                | 10,254.50  | 99.80%  | 2 | 3 | 5 | 0.05% | 27.30% | LGELPS<br>WILMR                                                    | 2.8  | 1,330.72 |
| Control | 6018 | Solute carrier family 39 (zinc transporter), member 7                   | gi 112362085,gi 115749633,gi 146231764,gi 63169171 | 42,835.10  | 99.80%  | 2 | 2 | 2 | 0.02% | 8.77%  | DGPVVRP<br>QNAEEE<br>KAGSDL<br>R                                   | 2.6  | 2,068.01 |

|         |      |                                                                      |                                                    |           |         |   |   |    |       |        |                                    |      |          |
|---------|------|----------------------------------------------------------------------|----------------------------------------------------|-----------|---------|---|---|----|-------|--------|------------------------------------|------|----------|
| Control | 6018 | Solute carrier family 39 (zinc transporters), member 7               | gi 112362085,gi 115749633,gi 146231764,gi 63169171 | 42,835.10 | 99.80%  | 2 | 2 | 2  | 0.02% | 8.77%  | EKQSSE<br>EEKEEA<br>GALR           | 2.58 | 1,819.87 |
| Control | 6018 | RecName : Full=Malate dehydrogenase, mitochondrial; Flags: Precursor | gi 118572778,gi 81674781                           | 35,651.00 | 100.00% | 7 | 9 | 12 | 0.12% | 31.10% | AGAGSA<br>TLSMAY<br>AGAR           | 3.97 | 1,470.70 |
| Control | 6018 | RecName : Full=Malate dehydrogenase, mitochondrial; Flags: Precursor | gi 118572778,gi 81674781                           | 35,651.00 | 100.00% | 7 | 9 | 12 | 0.12% | 31.10% | ANAFVA<br>ELKDLL<br>PAR            | 3.67 | 1,629.86 |
| Control | 6018 | RecName : Full=Malate dehydrogenase, mitochondrial; Flags: Precursor | gi 118572778,gi 81674781                           | 35,651.00 | 100.00% | 7 | 9 | 12 | 0.12% | 31.10% | IFGVTTL<br>DIVR                    | 3.43 | 1,233.72 |
| Control | 6018 | RecName : Full=Malate dehydrogenase, mitochondrial; Flags: Precursor | gi 118572778,gi 81674781                           | 35,651.00 | 100.00% | 7 | 9 | 12 | 0.12% | 31.10% | LTLYDIA<br>HTPGVA<br>ADLSHIE<br>TR | 5.82 | 2,393.25 |
| Control | 6018 | RecName : Full=Malate dehydrogenase, mitochondrial; Flags: Precursor | gi 118572778,gi 81674781                           | 35,651.00 | 100.00% | 7 | 9 | 12 | 0.12% | 31.10% | MIAEAIP<br>ELK                     | 2.46 | 1,130.61 |

|         |      |                                                                                                    |                                                 |           |         |   |   |    |       |        |                                  |          |
|---------|------|----------------------------------------------------------------------------------------------------|-------------------------------------------------|-----------|---------|---|---|----|-------|--------|----------------------------------|----------|
| Control | 6018 | RecName<br>:<br>Full=Mal<br>ate<br>dehydrog<br>enase,<br>mitochon<br>drial;<br>Flags:<br>Precursor | gi 1185727<br>78,gi 81674<br>781                | 35,651.00 | 100.00% | 7 | 9 | 12 | 0.12% | 31.10% | VAVLGA 6.85<br>SGGIGQP<br>LSLLLK | 1,793.09 |
| Control | 6018 | RecName<br>:<br>Full=Mal<br>ate<br>dehydrog<br>enase,<br>mitochon<br>drial;<br>Flags:<br>Precursor | gi 1185727<br>78,gi 81674<br>781                | 35,651.00 | 100.00% | 7 | 9 | 12 | 0.12% | 31.10% | VNVPVI 3.4<br>GGHAGK             | 1,147.66 |
| Control | 6018 | Chain A,<br>Subcomp<br>lex Of<br>The<br>Stator Of<br>Bovine<br>Mitochon<br>drial Atp<br>Synthase   | gi 1105910<br>26,gi 11059<br>1029,gi 602<br>033 | 24,651.00 | 100.00% | 5 | 6 | 21 | 0.21% | 27.60% | FGLIPEE 3.38<br>FFQFLYP<br>K     | 1,874.97 |
| Control | 6018 | Chain A,<br>Subcomp<br>lex Of<br>The<br>Stator Of<br>Bovine<br>Mitochon<br>drial Atp<br>Synthase   | gi 1105910<br>26,gi 11059<br>1029,gi 602<br>033 | 24,651.00 | 100.00% | 5 | 6 | 21 | 0.21% | 27.60% | HYLFDV 2.81<br>QR                | 1,077.55 |
| Control | 6018 | Chain A,<br>Subcomp<br>lex Of<br>The<br>Stator Of<br>Bovine<br>Mitochon<br>drial Atp<br>Synthase   | gi 1105910<br>26,gi 11059<br>1029,gi 602<br>033 | 24,651.00 | 100.00% | 5 | 6 | 21 | 0.21% | 27.60% | LNEQKIA 3.37<br>QLEEVK           | 1,541.85 |
| Control | 6018 | Chain A,<br>Subcomp<br>lex Of<br>The<br>Stator Of<br>Bovine<br>Mitochon<br>drial Atp<br>Synthase   | gi 1105910<br>26,gi 11059<br>1029,gi 602<br>033 | 24,651.00 | 100.00% | 5 | 6 | 21 | 0.21% | 27.60% | NNIAMA 4.1<br>LEVTYR             | 1,410.70 |

|         |      |                                                                         |                                                                          |           |         |   |    |    |       |        |                                                 |          |
|---------|------|-------------------------------------------------------------------------|--------------------------------------------------------------------------|-----------|---------|---|----|----|-------|--------|-------------------------------------------------|----------|
| Control | 6018 | Chain A, Subcomp lex Of The Stator Of Bovine Mitochondrial Atp Synthase | gi 110591026,gi 110591029,gi 602033                                      | 24,651.00 | 100.00% | 5 | 6  | 21 | 0.21% | 27.60% | PVPPLPE 1.74<br>HGGK                            | 1,127.62 |
| Control | 6018 | Ribosomal protein S8                                                    | gi 119224110,gi 58760384,gi 59858489,gi 70778956,gi 74268417,gi 75070020 | 24,188.40 | 100.00% | 2 | 2  | 3  | 0.03% | 13.50% | IIDVVYN 4.41<br>ASNNEL<br>VR                    | 1,718.91 |
| Control | 6018 | Ribosomal protein S8                                                    | gi 119224110,gi 58760384,gi 59858489,gi 70778956,gi 74268417,gi 75070020 | 24,188.40 | 100.00% | 2 | 2  | 3  | 0.03% | 13.50% | ISSLLEE 4.55<br>QFQQGK                          | 1,506.78 |
| Control | 6018 | RPS17 protein                                                           | gi 148745739,gi 149642675,gi 151554859,gi 166219437                      | 15,564.50 | 99.80%  | 2 | 2  | 2  | 0.02% | 36.30% | LLDFGSL 5.31<br>SNLQVT<br>QPTVGM<br>NFK         | 2,425.24 |
| Control | 6018 | RPS17 protein                                                           | gi 148745739,gi 149642675,gi 151554859,gi 166219437                      | 15,564.50 | 99.80%  | 2 | 2  | 2  | 0.02% | 36.30% | RDNYVP 3.01<br>EVSALD<br>QEIEVD<br>PDTKEM<br>LK | 3,162.55 |
| Control | 6018 | PREDICTED: similar to oxysterol 7alpha-hydroxylase                      | gi 194672764                                                             | 90,479.20 | 99.80%  | 2 | 2  | 2  | 0.02% | 4.22%  | AMAVLR 3.42<br>DEIDHLL<br>QSTGQK                | 2,141.10 |
| Control | 6018 | PREDICTED: similar to oxysterol 7alpha-hydroxylase                      | gi 194672764                                                             | 90,479.20 | 99.80%  | 2 | 2  | 2  | 0.02% | 4.22%  | FLFGIPY 2.6<br>PDSDLV<br>FR                     | 1,785.92 |
| Control | 6018 | TUBA1B protein                                                          | gi 148878019,gi 168804008                                                | 50,133.70 | 100.00% | 9 | 11 | 16 | 0.16% | 28.80% | AVFVDL 4.98<br>EPTVIDE<br>VR                    | 1,701.91 |
| Control | 6018 | TUBA1B protein                                                          | gi 148878019,gi 168804008                                                | 50,133.70 | 100.00% | 9 | 11 | 16 | 0.16% | 28.80% | DVNAAI 3.39<br>ATIK                             | 1,015.58 |
| Control | 6018 | TUBA1B protein                                                          | gi 148878019,gi 168804008                                                | 50,133.70 | 100.00% | 9 | 11 | 16 | 0.16% | 28.80% | EIIDLVL 2.45<br>DR                              | 1,085.62 |
| Control | 6018 | TUBA1B protein                                                          | gi 148878019,gi 168804008                                                | 50,133.70 | 100.00% | 9 | 11 | 16 | 0.16% | 28.80% | IHFPLAT 3.1<br>YAPVISA<br>EK                    | 1,756.96 |
| Control | 6018 | TUBA1B protein                                                          | gi 148878019,gi 168804008                                                | 50,133.70 | 100.00% | 9 | 11 | 16 | 0.16% | 28.80% | LDHKFD 3.05<br>LMYAK                            | 1,396.69 |
| Control | 6018 | TUBA1B protein                                                          | gi 148878019,gi 168804008                                                | 50,133.70 | 100.00% | 9 | 11 | 16 | 0.16% | 28.80% | LISQIVSS 3.6<br>ITASLR                          | 1,487.88 |

|         |      |                                                                                                                                                                          |                                             |           |         |   |    |    |       |        |                                       |      |          |
|---------|------|--------------------------------------------------------------------------------------------------------------------------------------------------------------------------|---------------------------------------------|-----------|---------|---|----|----|-------|--------|---------------------------------------|------|----------|
| Control | 6018 | TUBA1B protein                                                                                                                                                           | gi 148878019,gi 168804008                   | 50,133.70 | 100.00% | 9 | 11 | 16 | 0.16% | 28.80% | NLDIERP<br>TYTNLNR                    | 3.29 | 1,718.88 |
| Control | 6018 | TUBA1B protein                                                                                                                                                           | gi 148878019,gi 168804008                   | 50,133.70 | 100.00% | 9 | 11 | 16 | 0.16% | 28.80% | QLFHPE<br>QLITGKE<br>DAANNY<br>AR     | 3.53 | 2,415.21 |
| Control | 6018 | TUBA1B protein                                                                                                                                                           | gi 148878019,gi 168804008                   | 50,133.70 | 100.00% | 9 | 11 | 16 | 0.16% | 28.80% | TIGGGD<br>DSFNTEF<br>SETGAG<br>K      | 4    | 2,007.89 |
| Control | 6018 | tricarboxylate carrier protein 1                                                                                                                                         | gi 1765906,gi 2497986,gi 2780719            | 33,859.10 | 99.80%  | 2 | 2  | 2  | 0.02% | 7.72%  | GLSSLLY<br>GSIPK                      | 2.96 | 1,234.70 |
| Control | 6018 | tricarboxylate carrier protein 1                                                                                                                                         | gi 1765906,gi 2497986,gi 2780719            | 33,859.10 | 99.80%  | 2 | 2  | 2  | 0.02% | 7.72%  | GTYQGL<br>TATVLK                      | 2.81 | 1,251.69 |
| Control | 6018 | PREDICTED: similar to transmembrane protein 165                                                                                                                          | gi 76619924                                 | 34,667.10 | 99.80%  | 2 | 2  | 3  | 0.03% | 13.30% | MSPDEG<br>QEELEE<br>VQAELEK           | 3.67 | 2,076.93 |
| Control | 6018 | PREDICTED: similar to transmembrane protein 165                                                                                                                          | gi 76619924                                 | 34,667.10 | 99.80%  | 2 | 2  | 3  | 0.03% | 13.30% | NKEPPA<br>PAQQLQ<br>PQPAAV<br>QGPEPAR | 5.32 | 2,619.36 |
| Control | 6018 | RecName: Full=NA DH dehydrogenase [ubiquinone] l alpha subcomplex subunit 8; AltName: Full=NA DH-ubiquinone oxidoreductase 19 kDa subunit; AltName: Full=Complex I-19kD; | gi 1171870,gi 2846127,gi 5996815,gi 8682766 | 20,073.10 | 99.80%  | 2 | 3  | 3  | 0.03% | 18.60% | ARPEPN<br>PEVEGD<br>LKPAP             | 7.18 | 1,874.97 |













|         |      |                                                                                                                                                                                                                                           |            |         |    |    |    |       |        |                            |      |          |
|---------|------|-------------------------------------------------------------------------------------------------------------------------------------------------------------------------------------------------------------------------------------------|------------|---------|----|----|----|-------|--------|----------------------------|------|----------|
| Control | 6018 | RecName gi 266647<br>:<br>Full=Nitric oxide synthase, endothelial;<br>AltName: Full=Endothelial NOS;<br>Short=eNOS;<br>AltName: Full=EC-NOS;<br>AltName: Full=NO S type III;<br>Short=NO3;<br>AltName: Full=Constitutive NOS;<br>Short=cN | 133,270.00 | 100.00% | 11 | 14 | 17 | 0.17% | 12.40% | VEDPPPP<br>TESVAV<br>EQLEK | 4.73 | 1,963.99 |
| Control | 6018 | RecName gi 266647<br>:<br>Full=Nitric oxide synthase, endothelial;<br>AltName: Full=Endothelial NOS;<br>Short=eNOS;<br>AltName: Full=EC-NOS;<br>AltName: Full=NO S type III;<br>Short=NO3;<br>AltName: Full=Constitutive NOS;<br>Short=cN | 133,270.00 | 100.00% | 11 | 14 | 17 | 0.17% | 12.40% | VLTAFS<br>REPDSP<br>K      | 3.53 | 1,446.76 |
| Control | 6018 | PREDIC TED: similar to eukaryotic translation elongation factor 1 alpha 1 isoform 1<br>gi 1199383<br>28_gi 14874<br>5492_gi 682<br>99807_gi 86<br>827651                                                                                  | 50,141.20  | 100.00% | 3  | 4  | 7  | 0.07% | 10.20% | IGGIGTV<br>PVGR            | 2.83 | 1,025.61 |

|         |      |                                                                                                         |                                                                   |           |         |   |   |   |       |        |                                           |          |
|---------|------|---------------------------------------------------------------------------------------------------------|-------------------------------------------------------------------|-----------|---------|---|---|---|-------|--------|-------------------------------------------|----------|
| Control | 6018 | PREDICTED:<br>similar to<br>eukaryotic<br>translation<br>elongation<br>factor 1<br>alpha 1<br>isoform 1 | gi 1199383<br>28,gi 14874<br>5492,gi 682<br>99807,gi 86<br>827651 | 50,141.20 | 100.00% | 3 | 4 | 7 | 0.07% | 10.20% | VETGVL 4.06<br>KPGMVV<br>TFAPVN<br>VTTEVK | 2,531.38 |
| Control | 6018 | PREDICTED:<br>similar to<br>eukaryotic<br>translation<br>elongation<br>factor 1<br>alpha 1<br>isoform 1 | gi 1199383<br>28,gi 14874<br>5492,gi 682<br>99807,gi 86<br>827651 | 50,141.20 | 100.00% | 3 | 4 | 7 | 0.07% | 10.20% | YYVTIID 2.92<br>APGHR                     | 1,404.73 |
| Control | 6018 | cell<br>division<br>cycle 42<br>(GTP<br>binding<br>protein,<br>25kDa)                                   | gi 1140524<br>86,gi 12206<br>3301,gi 868<br>21687                 | 21,240.70 | 99.80%  | 2 | 3 | 6 | 0.06% | 19.90% | NVFDEAI 4.68<br>LAALEPP<br>EPK            | 1,852.97 |
| Control | 6018 | cell<br>division<br>cycle 42<br>(GTP<br>binding<br>protein,<br>25kDa)                                   | gi 1140524<br>86,gi 12206<br>3301,gi 868<br>21687                 | 21,240.70 | 99.80%  | 2 | 3 | 6 | 0.06% | 19.90% | TPFLLVG 3.59<br>TQIDLRD<br>DPSTIEK        | 2,358.26 |
| Control | 6018 | RecName<br>:<br>Full=Gol<br>gi SNAP<br>receptor<br>complex<br>member<br>1                               | gi 1089359<br>98,gi 83638<br>559,gi 8437<br>0083                  | 28,524.90 | 100.00% | 5 | 5 | 5 | 0.05% | 20.00% | ENMTSQ 2.87<br>RGMLKS<br>IQSK             | 1,837.93 |
| Control | 6018 | RecName<br>:<br>Full=Gol<br>gi SNAP<br>receptor<br>complex<br>member<br>1                               | gi 1089359<br>98,gi 83638<br>559,gi 8437<br>0083                  | 28,524.90 | 100.00% | 5 | 5 | 5 | 0.05% | 20.00% | FPAVNS 3.41<br>LIQR                       | 1,144.65 |
| Control | 6018 | RecName<br>:<br>Full=Gol<br>gi SNAP<br>receptor<br>complex<br>member<br>1                               | gi 1089359<br>98,gi 83638<br>559,gi 8437<br>0083                  | 28,524.90 | 100.00% | 5 | 5 | 5 | 0.05% | 20.00% | LIEETISI 2.99<br>AMATK                    | 1,435.77 |
| Control | 6018 | RecName<br>:<br>Full=Gol<br>gi SNAP<br>receptor<br>complex<br>member<br>1                               | gi 1089359<br>98,gi 83638<br>559,gi 8437<br>0083                  | 28,524.90 | 100.00% | 5 | 5 | 5 | 0.05% | 20.00% | MNTLAN 4.02<br>RFPVAVN<br>SLIQR           | 1,961.04 |

|         |      |                                                                                                                                                                                                 |                                                               |           |         |   |   |   |       |        |                                                |      |          |
|---------|------|-------------------------------------------------------------------------------------------------------------------------------------------------------------------------------------------------|---------------------------------------------------------------|-----------|---------|---|---|---|-------|--------|------------------------------------------------|------|----------|
| Control | 6018 | RecName<br>:<br>Full=Gol<br>gi SNAP<br>receptor<br>complex<br>member<br>1                                                                                                                       | gi 1089359<br>98,gi 83638<br>559,gi 8437<br>0083              | 28,524.90 | 100.00% | 5 | 5 | 5 | 0.05% | 20.00% | NSDRLE<br>ETISIAM<br>ATK                       | 3.32 | 1,907.97 |
| Control | 6018 | minor<br>histocom<br>patibility<br>antigen<br>13                                                                                                                                                | gi 1644486<br>16                                              | 41,537.10 | 100.00% | 3 | 3 | 5 | 0.05% | 15.60% | GEVTEM<br>FSYEESN<br>PKDPAA<br>VTETR           | 3.07 | 2,703.21 |
| Control | 6018 | minor<br>histocom<br>patibility<br>antigen<br>13                                                                                                                                                | gi 1644486<br>16                                              | 41,537.10 | 100.00% | 3 | 3 | 5 | 0.05% | 15.60% | LVFPQD<br>LLEK                                 | 2.64 | 1,201.68 |
| Control | 6018 | minor<br>histocom<br>patibility<br>antigen<br>13                                                                                                                                                | gi 1644486<br>16                                              | 41,537.10 | 100.00% | 3 | 3 | 5 | 0.05% | 15.60% | QYQLLF<br>TQGSGE<br>NKEEII<br>YEFDTK           | 4.99 | 2,994.44 |
| Control | 6018 | transcript<br>ion factor<br>EF1(A)                                                                                                                                                              | gi 162983.g<br>i 27807361,<br>gi 5404003<br>0,gi 868212<br>83 | 35,905.70 | 100.00% | 5 | 6 | 8 | 0.08% | 35.80% | EDGNEE<br>DKENQG<br>DETQGG<br>QPPQR            | 3.93 | 2,628.10 |
| Control | 6018 | transcript<br>ion factor<br>EF1(A)                                                                                                                                                              | gi 162983.g<br>i 27807361,<br>gi 5404003<br>0,gi 868212<br>83 | 35,905.70 | 100.00% | 5 | 6 | 8 | 0.08% | 35.80% | GAEAA<br>VTGPGG<br>VPVQGS<br>K                 | 4.91 | 1,695.87 |
| Control | 6018 | transcript<br>ion factor<br>EF1(A)                                                                                                                                                              | gi 162983.g<br>i 27807361,<br>gi 5404003<br>0,gi 868212<br>83 | 35,905.70 | 100.00% | 5 | 6 | 8 | 0.08% | 35.80% | NDTKED<br>VVFHQT<br>AIK                        | 4.13 | 1,744.89 |
| Control | 6018 | transcript<br>ion factor<br>EF1(A)                                                                                                                                                              | gi 162983.g<br>i 27807361,<br>gi 5404003<br>0,gi 868212<br>83 | 35,905.70 | 100.00% | 5 | 6 | 8 | 0.08% | 35.80% | NYQQNY<br>QNSESG<br>EKNEGS<br>ESAPEG<br>QAQQR  | 6.06 | 3,257.40 |
| Control | 6018 | transcript<br>ion factor<br>EF1(A)                                                                                                                                                              | gi 162983.g<br>i 27807361,<br>gi 5404003<br>0,gi 868212<br>83 | 35,905.70 | 100.00% | 5 | 6 | 8 | 0.08% | 35.80% | RPQYSN<br>PPVQGE<br>VMEGAD<br>NQGAGE<br>QGRPVR | 4.69 | 3,239.53 |
| Control | 6018 | PREDIC<br>TED:<br>similar to<br>Feline<br>leukemia<br>virus<br>subgroup<br>C<br>receptor-<br>related<br>protein 1<br>(Feline<br>leukemia<br>virus<br>subgroup<br>C<br>receptor)<br>(hFLVC<br>R) | gi 1946742<br>42                                              | 59,731.10 | 99.80%  | 2 | 2 | 2 | 0.02% | 3.60%  | DPGEET<br>PGGEGT<br>LVPR                       | 3.07 | 1,610.77 |



|         |      |                                                                                                                                                                                         |                                                                                   |           |         |   |   |    |       |        |                                                       |      |          |
|---------|------|-----------------------------------------------------------------------------------------------------------------------------------------------------------------------------------------|-----------------------------------------------------------------------------------|-----------|---------|---|---|----|-------|--------|-------------------------------------------------------|------|----------|
| Control | 6018 | PREDICTED:<br>similar to<br>Feline<br>leukemia<br>virus<br>subgroup<br>C<br>receptor-<br>related<br>protein 1<br>(Feline<br>leukemia<br>virus<br>subgroup<br>C<br>receptor)<br>(hFLVCR) | gi 1946742<br>42                                                                  | 59,731.10 | 99.80%  | 2 | 2 | 2  | 0.02% | 3.60%  | LLPKDP<br>GEETPG<br>GEGTLV<br>PR                      | 3.71 | 2,062.08 |
| Control | 6018 | H3 histone, family 3A                                                                                                                                                                   | gi 5985828<br>9,gi 621771<br>68,gi 95769<br>331                                   | 15,310.70 | 100.00% | 3 | 6 | 11 | 0.11% | 38.20% | EIAQDFK<br>TDLR                                       | 3.49 | 1,335.69 |
| Control | 6018 | H3 histone, family 3A                                                                                                                                                                   | gi 5985828<br>9,gi 621771<br>68,gi 95769<br>331                                   | 15,310.70 | 100.00% | 3 | 6 | 11 | 0.11% | 38.20% | FQSA AIG<br>ALQEAS<br>EAYLVG<br>LFEDTN<br>LCAIHA<br>K | 5.48 | 3,380.68 |
| Control | 6018 | H3 histone, family 3A                                                                                                                                                                   | gi 5985828<br>9,gi 621771<br>68,gi 95769<br>331                                   | 15,310.70 | 100.00% | 3 | 6 | 11 | 0.11% | 38.20% | YRPGTV<br>ALR                                         | 2.51 | 1,032.59 |
| Control | 6018 | dihydrooate dehydrogenase precursor                                                                                                                                                     | gi 1106656<br>38,gi 11236<br>2407,gi 598<br>57979,gi 62<br>751827,gi 7<br>5057853 | 42,758.80 | 100.00% | 4 | 4 | 4  | 0.04% | 13.70% | FTSLGLL<br>PR                                         | 2.76 | 1,003.59 |
| Control | 6018 | dihydrooate dehydrogenase precursor                                                                                                                                                     | gi 1106656<br>38,gi 11236<br>2407,gi 598<br>57979,gi 62<br>751827,gi 7<br>5057853 | 42,758.80 | 100.00% | 4 | 4 | 4  | 0.04% | 13.70% | LTEDGL<br>PLGINLG<br>K                                | 4.56 | 1,439.81 |
| Control | 6018 | dihydrooate dehydrogenase precursor                                                                                                                                                     | gi 1106656<br>38,gi 11236<br>2407,gi 598<br>57979,gi 62<br>751827,gi 7<br>5057853 | 42,758.80 | 100.00% | 4 | 4 | 4  | 0.04% | 13.70% | VFRLPE<br>DQAIINR                                     | 4.19 | 1,570.87 |
| Control | 6018 | dihydrooate dehydrogenase precursor                                                                                                                                                     | gi 1106656<br>38,gi 11236<br>2407,gi 598<br>57979,gi 62<br>751827,gi 7<br>5057853 | 42,758.80 | 100.00% | 4 | 4 | 4  | 0.04% | 13.70% | VPIVGV<br>GGVSSG<br>QDALEK                            | 5.46 | 1,711.92 |

|         |      |                                                                                                              |                                                                        |           |         |   |   |   |       |        |                                  |          |
|---------|------|--------------------------------------------------------------------------------------------------------------|------------------------------------------------------------------------|-----------|---------|---|---|---|-------|--------|----------------------------------|----------|
| Control | 6018 | PREDIC TED: eukaryotic translation elongation factor 1 delta (guanine nucleotide exchange protein) isoform 1 | gi 119906216,gi 146231746,gi 172047287                                 | 32,883.70 | 99.80%  | 2 | 2 | 2 | 0.02% | 8.03%  | GVVQDL 2.75<br>QAVSK             | 1,271.70 |
| Control | 6018 | PREDIC TED: eukaryotic translation elongation factor 1 delta (guanine nucleotide exchange protein) isoform 1 | gi 119906216,gi 146231746,gi 172047287                                 | 32,883.70 | 99.80%  | 2 | 2 | 2 | 0.02% | 8.03%  | IASLEVE 3.86<br>NQLR             | 1,358.73 |
| Control | 6018 | TM9SF4 protein                                                                                               | gi 146186797,gi 166063945,gi 172047290                                 | 74,351.10 | 100.00% | 3 | 3 | 4 | 0.04% | 6.54%  | AENLGE 2.53<br>VLR               | 1,000.54 |
| Control | 6018 | TM9SF4 protein                                                                                               | gi 146186797,gi 166063945,gi 172047290                                 | 74,351.10 | 100.00% | 3 | 3 | 4 | 0.04% | 6.54%  | ISEDYYV 3.88<br>HLIADNL<br>PVATR | 2,189.12 |
| Control | 6018 | TM9SF4 protein                                                                                               | gi 146186797,gi 166063945,gi 172047290                                 | 74,351.10 | 100.00% | 3 | 3 | 4 | 0.04% | 6.54%  | IVNTPFQ 3.81<br>VLMNSE<br>K      | 1,635.84 |
| Control | 6018 | PREDIC TED: similar to Glyceraldehyde-3-phosphate dehydrogenase isoform 2                                    | gi 119893091,gi 1841758,gi 2285903,gi 73587299,gi 77404273,gi 89573947 | 35,850.00 | 100.00% | 4 | 4 | 7 | 0.07% | 21.00% | AITIFQE 3.51<br>RDPANI<br>K      | 1,615.88 |
| Control | 6018 | PREDIC TED: similar to Glyceraldehyde-3-phosphate dehydrogenase isoform 2                                    | gi 119893091,gi 1841758,gi 2285903,gi 73587299,gi 77404273,gi 89573947 | 35,850.00 | 100.00% | 4 | 4 | 7 | 0.07% | 21.00% | GAAQNII 4.38<br>PASTGA<br>AK     | 1,369.74 |

|         |      |                                                                          |                                                                        |           |         |   |   |   |       |        |                                          |          |
|---------|------|--------------------------------------------------------------------------|------------------------------------------------------------------------|-----------|---------|---|---|---|-------|--------|------------------------------------------|----------|
| Control | 6018 | PREDICTED: similar to Glyceraldehyde-3-phosphate dehydrogenase isoform 2 | gi 119893091,gi 1841758,gi 2285903,gi 73587299,gi 77404273,gi 89573947 | 35,850.00 | 100.00% | 4 | 4 | 7 | 0.07% | 21.00% | IVSNASC 3.05<br>TTNCLA<br>PLAK           | 1,705.86 |
| Control | 6018 | PREDICTED: similar to Glyceraldehyde-3-phosphate dehydrogenase isoform 2 | gi 119893091,gi 1841758,gi 2285903,gi 73587299,gi 77404273,gi 89573947 | 35,850.00 | 100.00% | 4 | 4 | 7 | 0.07% | 21.00% | VIHDHF 4.9<br>GIVEGL<br>MTTVHA<br>ITATQK | 2,634.37 |
| Control | 6018 | 14-3-3 protein eta chain                                                 | gi 162592,gi 55976654,gi 73586681,gi 73853758                          | 28,193.60 | 99.80%  | 2 | 2 | 2 | 0.02% | 12.20% | AVTELN 4.02<br>EPLSNED<br>R              | 1,586.77 |
| Control | 6018 | 14-3-3 protein eta chain                                                 | gi 162592,gi 55976654,gi 73586681,gi 73853758                          | 28,193.60 | 99.80%  | 2 | 2 | 2 | 0.02% | 12.20% | LAEQAE 4.05<br>RYDDM<br>ASAMK            | 1,844.82 |
| Control | 6018 | TMEM43 protein                                                           | gi 151556045,gi 156523072                                              | 44,774.20 | 100.00% | 3 | 4 | 5 | 0.05% | 8.25%  | FFLSAGL 4.74<br>IDKVDN<br>FK             | 1,713.92 |
| Control | 6018 | TMEM43 protein                                                           | gi 151556045,gi 156523072                                              | 44,774.20 | 100.00% | 3 | 4 | 5 | 0.05% | 8.25%  | LEDPHV 2.55<br>DIIR                      | 1,206.65 |
| Control | 6018 | TMEM43 protein                                                           | gi 151556045,gi 156523072                                              | 44,774.20 | 100.00% | 3 | 4 | 5 | 0.05% | 8.25%  | YPEVGD 2.57<br>LR                        | 948.4786 |
| Control | 6018 | integral membrane protein 1                                              | gi 114051696,gi 122136222,gi 152941168,gi 86823970                     | 80,641.10 | 100.00% | 3 | 3 | 4 | 0.04% | 4.68%  | FESVIHE 4.93<br>FDPYFN<br>YR             | 1,962.90 |
| Control | 6018 | integral membrane protein 1                                              | gi 114051696,gi 122136222,gi 152941168,gi 86823970                     | 80,641.10 | 100.00% | 3 | 3 | 4 | 0.04% | 4.68%  | FYSLLDP 2.68<br>SYAK                     | 1,303.66 |
| Control | 6018 | integral membrane protein 1                                              | gi 114051696,gi 122136222,gi 152941168,gi 86823970                     | 80,641.10 | 100.00% | 3 | 3 | 4 | 0.04% | 4.68%  | IIFDDFR 2.38                             | 925.4779 |
| Control | 6018 | Myeloid-associated differentiation marker                                | gi 111308557,gi 115497460                                              | 35,291.10 | 100.00% | 3 | 4 | 7 | 0.07% | 14.60% | ARPGEIT 3.21<br>GYMATV<br>PGLLK          | 1,890.02 |

|         |      |                                                                                                            |                                                                                                       |           |         |   |   |    |       |        |                                     |      |          |
|---------|------|------------------------------------------------------------------------------------------------------------|-------------------------------------------------------------------------------------------------------|-----------|---------|---|---|----|-------|--------|-------------------------------------|------|----------|
| Control | 6018 | Myeloid-associated differentiation marker                                                                  | gi 111308557,gi 115497460                                                                             | 35,291.10 | 100.00% | 3 | 4 | 7  | 0.07% | 14.60% | LVFVRV                              | 2.2  | 732.4766 |
| Control | 6018 | Myeloid-associated differentiation marker                                                                  | gi 111308557,gi 115497460                                                                             | 35,291.10 | 100.00% | 3 | 4 | 7  | 0.07% | 14.60% | TTVTTT<br>MSSSSG<br>LGSPTIV<br>GSPR | 4.52 | 2,240.11 |
| Control | 6018 | Myosin regulatory light chain MRCL3                                                                        | gi 109659359,gi 134024635,gi 139948749,gi 148744185,gi 194678093,gi 205829192,gi 59858321,gi 62751407 | 19,848.30 | 99.80%  | 2 | 3 | 3  | 0.03% | 16.90% | ATSNVF<br>AMFDQS<br>QIQEFK          | 4.82 | 2,106.98 |
| Control | 6018 | Myosin regulatory light chain MRCL3                                                                        | gi 109659359,gi 134024635,gi 139948749,gi 148744185,gi 194678093,gi 205829192,gi 59858321,gi 62751407 | 19,848.30 | 99.80%  | 2 | 3 | 3  | 0.03% | 16.90% | FTDEEV<br>DELYR                     | 3.24 | 1,415.63 |
| Control | 6018 | PREDICTED: similar to Keratin 10 (epidermolytic hyperkeratosis; keratosis palmaris et plantaris) isoform 2 | gi 194685481,gi 194685483                                                                             | 54,832.90 | 100.00% | 7 | 8 | 14 | 0.14% | 14.10% | DAAEAWF<br>NEK                      | 2.95 | 1,109.49 |
| Control | 6018 | PREDICTED: similar to Keratin 10 (epidermolytic hyperkeratosis; keratosis palmaris et plantaris) isoform 2 | gi 194685481,gi 194685483                                                                             | 54,832.90 | 100.00% | 7 | 8 | 14 | 0.14% | 14.10% | IRLENEI<br>QTYR                     | 4.32 | 1,434.77 |

|         |      |                                                                                                                                              |           |         |   |   |    |       |        |                |      |          |
|---------|------|----------------------------------------------------------------------------------------------------------------------------------------------|-----------|---------|---|---|----|-------|--------|----------------|------|----------|
| Control | 6018 | PREDIC TED: gi 1946854 81.gi 19468 similar to 5483<br>Keratin 10 (epiderm olytic hyperkera tosis; keratosis palmaris et plantaris) isoform 2 | 54,832.90 | 100.00% | 7 | 8 | 14 | 0.14% | 14.10% | LASYLD KVR     | 2.97 | 1,064.61 |
| Control | 6018 | PREDIC TED: gi 1946854 81.gi 19468 similar to 5483<br>Keratin 10 (epiderm olytic hyperkera tosis; keratosis palmaris et plantaris) isoform 2 | 54,832.90 | 100.00% | 7 | 8 | 14 | 0.14% | 14.10% | QSLEASL AETEGR | 4.34 | 1,390.68 |
| Control | 6018 | PREDIC TED: gi 1946854 81.gi 19468 similar to 5483<br>Keratin 10 (epiderm olytic hyperkera tosis; keratosis palmaris et plantaris) isoform 2 | 54,832.90 | 100.00% | 7 | 8 | 14 | 0.14% | 14.10% | QSVEADI NGLR   | 3.36 | 1,201.62 |
| Control | 6018 | PREDIC TED: gi 1946854 81.gi 19468 similar to 5483<br>Keratin 10 (epiderm olytic hyperkera tosis; keratosis palmaris et plantaris) isoform 2 | 54,832.90 | 100.00% | 7 | 8 | 14 | 0.14% | 14.10% | RVLDEL TLTK    | 3.02 | 1,187.70 |
| Control | 6018 | PREDIC TED: gi 1946854 81.gi 19468 similar to 5483<br>Keratin 10 (epiderm olytic hyperkera tosis; keratosis palmaris et plantaris) isoform 2 | 54,832.90 | 100.00% | 7 | 8 | 14 | 0.14% | 14.10% | SQYEQL AEKNR   | 4.01 | 1,365.68 |

|         |      |                                                                                                                                                  |                                                                 |            |         |   |   |    |       |        |                                              |      |          |
|---------|------|--------------------------------------------------------------------------------------------------------------------------------------------------|-----------------------------------------------------------------|------------|---------|---|---|----|-------|--------|----------------------------------------------|------|----------|
| Control | 6018 | PREDICTED:<br>similar to<br>Keratin<br>10<br>(epiderm<br>olytic<br>hyperkera<br>tosis;<br>keratosis<br>palmaris<br>et<br>plantaris)<br>isoform 2 | gi 1946854<br>81.gi 19468<br>5483                               | 54,832.90  | 100.00% | 7 | 8 | 14 | 0.14% | 14.10% | VLDELT<br>LTK                                | 3.07 | 1,031.60 |
| Control | 6018 | MATR3<br>protein                                                                                                                                 | gi 1340246<br>43.gi 15652<br>3084                               | 93,810.30  | 100.00% | 5 | 6 | 7  | 0.07% | 11.40% | DLDELS<br>RYPEDKI<br>TPENLP<br>QILLQLK       | 5.92 | 3,080.65 |
| Control | 6018 | MATR3<br>protein                                                                                                                                 | gi 1340246<br>43.gi 15652<br>3084                               | 93,810.30  | 100.00% | 5 | 6 | 7  | 0.07% | 11.40% | DSFDDR<br>GPSLNP<br>VLDYDH<br>GSR            | 4.06 | 2,362.07 |
| Control | 6018 | MATR3<br>protein                                                                                                                                 | gi 1340246<br>43.gi 15652<br>3084                               | 93,810.30  | 100.00% | 5 | 6 | 7  | 0.07% | 11.40% | VIHLSNL<br>PHSGYS<br>DSAVLK                  | 2.86 | 2,037.08 |
| Control | 6018 | MATR3<br>protein                                                                                                                                 | gi 1340246<br>43.gi 15652<br>3084                               | 93,810.30  | 100.00% | 5 | 6 | 7  | 0.07% | 11.40% | VVHIMD<br>FQR                                | 3.02 | 1,160.59 |
| Control | 6018 | MATR3<br>protein                                                                                                                                 | gi 1340246<br>43.gi 15652<br>3084                               | 93,810.30  | 100.00% | 5 | 6 | 7  | 0.07% | 11.40% | YQLLQL<br>VEPFGVI<br>SNHLILN<br>K            | 3.71 | 2,438.38 |
| Control | 6018 | PREDICTED:<br>similar to<br>dynein,<br>cytoplas<br>mic,<br>heavy<br>polypepti<br>de 1<br>isoform 3                                               | gi 1946770<br>09                                                | 531,935.00 | 99.80%  | 2 | 2 | 2  | 0.02% | 0.88%  | VAAPDV<br>VVPTLD<br>TVR                      | 3.68 | 1,551.87 |
| Control | 6018 | PREDICTED:<br>similar to<br>dynein,<br>cytoplas<br>mic,<br>heavy<br>polypepti<br>de 1<br>isoform 3                                               | gi 1946770<br>09                                                | 531,935.00 | 99.80%  | 2 | 2 | 2  | 0.02% | 0.88%  | VLTLSLSE<br>DSPYET<br>LHSFISN<br>AVAPFF<br>K | 3.18 | 2,912.47 |
| Control | 6018 | Mannose-<br>6-<br>phosphat<br>e receptor<br>(cation<br>dependen<br>t)                                                                            | gi 1113085<br>51.gi 11993<br>6494.gi 127<br>292.gi 2846<br>1185 | 31,183.50  | 100.00% | 5 | 8 | 13 | 0.13% | 29.00% | EAGNHS<br>SGAGLV<br>QINK                     | 2.73 | 1,581.80 |
| Control | 6018 | Mannose-<br>6-<br>phosphat<br>e receptor<br>(cation<br>dependen<br>t)                                                                            | gi 1113085<br>51.gi 11993<br>6494.gi 127<br>292.gi 2846<br>1185 | 31,183.50  | 100.00% | 5 | 8 | 13 | 0.13% | 29.00% | GKESEK<br>ELALLK                             | 3.18 | 1,344.77 |

|         |      |                                                                          |                                                 |           |         |   |   |    |       |        |                                                     |      |          |
|---------|------|--------------------------------------------------------------------------|-------------------------------------------------|-----------|---------|---|---|----|-------|--------|-----------------------------------------------------|------|----------|
| Control | 6018 | Mannose-6-phosphate receptor (cation dependent)                          | gi 111308551.gi 119936494.gi 127292.gi 28461185 | 31,183.50 | 100.00% | 5 | 8 | 13 | 0.13% | 29.00% | GVGDDQ<br>LGEESSE<br>RDDHLL<br>PM                   | 3.22 | 2,357.02 |
| Control | 6018 | Mannose-6-phosphate receptor (cation dependent)                          | gi 111308551.gi 119936494.gi 127292.gi 28461185 | 31,183.50 | 100.00% | 5 | 8 | 13 | 0.13% | 29.00% | HTLADN<br>FNPVSEER                                  | 5.46 | 1,628.77 |
| Control | 6018 | Mannose-6-phosphate receptor (cation dependent)                          | gi 111308551.gi 119936494.gi 127292.gi 28461185 | 31,183.50 | 100.00% | 5 | 8 | 13 | 0.13% | 29.00% | SFESTVG<br>QSPDMY<br>SYVFR                          | 4.87 | 2,115.93 |
| Control | 6018 | ADP-ribosylation-like factor 6 interacting protein 5                     | gi 59858163.gi 62460474.gi 74354855.gi 75057806 | 21,648.60 | 99.80%  | 2 | 3 | 8  | 0.08% | 13.80% | FARPDF<br>R                                         | 1.79 | 908.4737 |
| Control | 6018 | ADP-ribosylation-like factor 6 interacting protein 5                     | gi 59858163.gi 62460474.gi 74354855.gi 75057806 | 21,648.60 | 99.80%  | 2 | 3 | 8  | 0.08% | 13.80% | TPMGIV<br>LDALEQ<br>QEETITK                         | 5.85 | 2,132.08 |
| Control | 6018 | Heterogeneous nuclear ribonucleoprotein U (scaffold attachment factor A) | gi 124828988.gi 125991756                       | 90,435.30 | 100.00% | 5 | 5 | 6  | 0.06% | 12.10% | EKPYFPI<br>PEDYTFI<br>QNVPLE<br>DR                  | 5.28 | 2,710.34 |
| Control | 6018 | Heterogeneous nuclear ribonucleoprotein U (scaffold attachment factor A) | gi 124828988.gi 125991756                       | 90,435.30 | 100.00% | 5 | 5 | 6  | 0.06% | 12.10% | GYFEYIE<br>ENKYSR                                   | 3.07 | 1,697.78 |
| Control | 6018 | Heterogeneous nuclear ribonucleoprotein U (scaffold attachment factor A) | gi 124828988.gi 125991756                       | 90,435.30 | 100.00% | 5 | 5 | 6  | 0.06% | 12.10% | LQAALD<br>DEEAGG<br>RPAMEP<br>GNGLD<br>LGGDSA<br>GR | 5.08 | 3,142.43 |

|         |      |                                                                          |                                     |           |         |   |   |    |       |        |                                           |          |
|---------|------|--------------------------------------------------------------------------|-------------------------------------|-----------|---------|---|---|----|-------|--------|-------------------------------------------|----------|
| Control | 6018 | Heterogeneous nuclear ribonucleoprotein U (scaffold attachment factor A) | gi124828988,gi125991756             | 90,435.30 | 100.00% | 5 | 5 | 6  | 0.06% | 12.10% | NFILDQT 3.74<br>NVSAAA<br>QR              | 1,647.84 |
| Control | 6018 | Heterogeneous nuclear ribonucleoprotein U (scaffold attachment factor A) | gi124828988,gi125991756             | 90,435.30 | 100.00% | 5 | 5 | 6  | 0.06% | 12.10% | SSGPTSL 2.59<br>FAVTVA<br>PPGAR           | 1,714.91 |
| Control | 6018 | Ectonucleotide pyrophosphatase/hosphodiesterase 4 (putative function)    | gi124829038,gi125630707,gi171769867 | 51,147.90 | 100.00% | 3 | 4 | 4  | 0.04% | 9.27%  | ADYLQN 3.37<br>YEFPHL<br>QNFIK            | 2,140.05 |
| Control | 6018 | Ectonucleotide pyrophosphatase/hosphodiesterase 4 (putative function)    | gi124829038,gi125630707,gi171769867 | 51,147.90 | 100.00% | 3 | 4 | 4  | 0.04% | 9.27%  | LLVSFD 3.48<br>GFR                        | 1,166.66 |
| Control | 6018 | Ectonucleotide pyrophosphatase/hosphodiesterase 4 (putative function)    | gi124829038,gi125630707,gi171769867 | 51,147.90 | 100.00% | 3 | 4 | 4  | 0.04% | 9.27%  | VLEEIDE 3.49<br>HIGELV<br>HR              | 1,787.93 |
| Control | 6018 | DPYSL3 protein                                                           | gi154426078,gi155371867             | 73,970.90 | 100.00% | 4 | 4 | 4  | 0.04% | 9.65%  | EESREPA 3.42<br>PASPAPA<br>GVEIR          | 1,962.99 |
| Control | 6018 | DPYSL3 protein                                                           | gi154426078,gi155371867             | 73,970.90 | 100.00% | 4 | 4 | 4  | 0.04% | 9.65%  | MDENQF 3.65<br>VAVTST<br>NAAK             | 1,741.81 |
| Control | 6018 | DPYSL3 protein                                                           | gi154426078,gi155371867             | 73,970.90 | 100.00% | 4 | 4 | 4  | 0.04% | 9.65%  | NLHQSG 3.29<br>FSLSGTQ<br>VDEGVR          | 2,030.99 |
| Control | 6018 | DPYSL3 protein                                                           | gi154426078,gi155371867             | 73,970.90 | 100.00% | 4 | 4 | 4  | 0.04% | 9.65%  | TLDFDA 2.94<br>LSVGQR                     | 1,321.67 |
| Control | 6018 | TOMM2 protein                                                            | gi151556851,gi154152189             | 15,275.00 | 100.00% | 5 | 7 | 14 | 0.14% | 52.10% | GDAEKP 4.02<br>EEEEEE<br>DDEELD<br>ETLSER | 2,935.23 |
| Control | 6018 | TOMM2 protein                                                            | gi151556851,gi154152189             | 15,275.00 | 100.00% | 5 | 7 | 14 | 0.14% | 52.10% | LQMEQQ 4.31<br>QQLQQR                     | 1,557.78 |



|         |      |                                                                                                           |                                                                                                                                                         |           |         |    |    |    |       |        |                                                     |          |
|---------|------|-----------------------------------------------------------------------------------------------------------|---------------------------------------------------------------------------------------------------------------------------------------------------------|-----------|---------|----|----|----|-------|--------|-----------------------------------------------------|----------|
| Control | 6018 | TOMM2<br>2 protein                                                                                        | gi 1515568<br>51.gi 15415<br>2189                                                                                                                       | 15,275.00 | 100.00% | 5  | 7  | 14 | 0.14% | 52.10% | LWGLTE 2.79<br>MFPER                                | 1,394.68 |
| Control | 6018 | TOMM2<br>2 protein                                                                                        | gi 1515568<br>51.gi 15415<br>2189                                                                                                                       | 15,275.00 | 100.00% | 5  | 7  | 14 | 0.14% | 52.10% | QILLGPN 4.75<br>TGLSGG<br>MPGALP<br>SLPGK           | 2,291.24 |
| Control | 6018 | TOMM2<br>2 protein                                                                                        | gi 1515568<br>51.gi 15415<br>2189                                                                                                                       | 15,275.00 | 100.00% | 5  | 7  | 14 | 0.14% | 52.10% | QILLGPN 3.86<br>TGLSGG<br>MPGALP<br>SLPGKI          | 2,388.33 |
| Control | 6018 | RecName<br>:<br>Full=AT<br>P<br>synthase<br>subunit<br>beta,<br>mitochon<br>drial;<br>Flags:<br>Precursor | gi 114543.g<br>i 15842902<br>3.gi 158429<br>024.gi 1584<br>29025.gi 15<br>8431069.gi <br>158431070,<br>gi 1584310<br>71.gi 28461<br>221.gi 9457<br>4271 | 51,687.60 | 100.00% | 21 | 23 | 42 | 0.41% | 71.60% | AIAELGI 4.68<br>YPAVDP<br>LDSTSR                    | 1,988.03 |
| Control | 6018 | RecName<br>:<br>Full=AT<br>P<br>synthase<br>subunit<br>beta,<br>mitochon<br>drial;<br>Flags:<br>Precursor | gi 114543.g<br>i 15842902<br>3.gi 158429<br>024.gi 1584<br>29025.gi 15<br>8431069.gi <br>158431070,<br>gi 1584310<br>71.gi 28461<br>221.gi 9457<br>4271 | 51,687.60 | 100.00% | 21 | 23 | 42 | 0.41% | 71.60% | DQEGQD 5.22<br>VLLFIDN<br>IFR                       | 1,921.97 |
| Control | 6018 | RecName<br>:<br>Full=AT<br>P<br>synthase<br>subunit<br>beta,<br>mitochon<br>drial;<br>Flags:<br>Precursor | gi 114543.g<br>i 15842902<br>3.gi 158429<br>024.gi 1584<br>29025.gi 15<br>8431069.gi <br>158431070,<br>gi 1584310<br>71.gi 28461<br>221.gi 9457<br>4271 | 51,687.60 | 100.00% | 21 | 23 | 42 | 0.41% | 71.60% | FTQAGS 5.04<br>EVSALL<br>GR                         | 1,435.75 |
| Control | 6018 | RecName<br>:<br>Full=AT<br>P<br>synthase<br>subunit<br>beta,<br>mitochon<br>drial;<br>Flags:<br>Precursor | gi 114543.g<br>i 15842902<br>3.gi 158429<br>024.gi 1584<br>29025.gi 15<br>8431069.gi <br>158431070,<br>gi 1584310<br>71.gi 28461<br>221.gi 9457<br>4271 | 51,687.60 | 100.00% | 21 | 23 | 42 | 0.41% | 71.60% | GFQQILA 3.05<br>GEYDHL<br>PEQAFY<br>MVGPIE<br>EAVAK | 3,350.64 |

|         |      |                                                                                                           |                                                                                                                                                         |           |         |    |    |    |       |        |                                                               |          |
|---------|------|-----------------------------------------------------------------------------------------------------------|---------------------------------------------------------------------------------------------------------------------------------------------------------|-----------|---------|----|----|----|-------|--------|---------------------------------------------------------------|----------|
| Control | 6018 | RecName<br>:<br>Full=AT<br>P<br>synthase<br>subunit<br>beta,<br>mitochon<br>drial;<br>Flags:<br>Precursor | gi 114543.g<br>i 15842902<br>3,gi 158429<br>024,gi 1584<br>29025,gi 15<br>8431069,gi <br>158431070,<br>gi 1584310<br>71,gi 28461<br>221,gi 9457<br>4271 | 51,687.60 | 100.00% | 21 | 23 | 42 | 0.41% | 71.60% | GSITSVQ 3.35<br>AIYVPA<br>DDLTFP<br>APATTF<br>AHLDAT<br>TVLSR | 3,714.89 |
| Control | 6018 | RecName<br>:<br>Full=AT<br>P<br>synthase<br>subunit<br>beta,<br>mitochon<br>drial;<br>Flags:<br>Precursor | gi 114543.g<br>i 15842902<br>3,gi 158429<br>024,gi 1584<br>29025,gi 15<br>8431069,gi <br>158431070,<br>gi 1584310<br>71,gi 28461<br>221,gi 9457<br>4271 | 51,687.60 | 100.00% | 21 | 23 | 42 | 0.41% | 71.60% | IMDPNIV 3.76<br>GSEHYD<br>VAR                                 | 1,831.86 |
| Control | 6018 | RecName<br>:<br>Full=AT<br>P<br>synthase<br>subunit<br>beta,<br>mitochon<br>drial;<br>Flags:<br>Precursor | gi 114543.g<br>i 15842902<br>3,gi 158429<br>024,gi 1584<br>29025,gi 15<br>8431069,gi <br>158431070,<br>gi 1584310<br>71,gi 28461<br>221,gi 9457<br>4271 | 51,687.60 | 100.00% | 21 | 23 | 42 | 0.41% | 71.60% | IMNVIGE 3.63<br>PIDER                                         | 1,401.70 |
| Control | 6018 | RecName<br>:<br>Full=AT<br>P<br>synthase<br>subunit<br>beta,<br>mitochon<br>drial;<br>Flags:<br>Precursor | gi 114543.g<br>i 15842902<br>3,gi 158429<br>024,gi 1584<br>29025,gi 15<br>8431069,gi <br>158431070,<br>gi 1584310<br>71,gi 28461<br>221,gi 9457<br>4271 | 51,687.60 | 100.00% | 21 | 23 | 42 | 0.41% | 71.60% | IMNVIGE 3.52<br>PIDERGP<br>IK                                 | 1,796.96 |
| Control | 6018 | RecName<br>:<br>Full=AT<br>P<br>synthase<br>subunit<br>beta,<br>mitochon<br>drial;<br>Flags:<br>Precursor | gi 114543.g<br>i 15842902<br>3,gi 158429<br>024,gi 1584<br>29025,gi 15<br>8431069,gi <br>158431070,<br>gi 1584310<br>71,gi 28461<br>221,gi 9457<br>4271 | 51,687.60 | 100.00% | 21 | 23 | 42 | 0.41% | 71.60% | IPSAVGY 5.21<br>QPTLAT<br>DMGTM<br>QER                        | 2,282.08 |

|         |      |                                                                                                           |                                                                                                                                                         |           |         |    |    |    |       |        |                                                    |          |
|---------|------|-----------------------------------------------------------------------------------------------------------|---------------------------------------------------------------------------------------------------------------------------------------------------------|-----------|---------|----|----|----|-------|--------|----------------------------------------------------|----------|
| Control | 6018 | RecName<br>:<br>Full=AT<br>P<br>synthase<br>subunit<br>beta,<br>mitochon<br>drial;<br>Flags:<br>Precursor | gi 114543.g<br>i 15842902<br>3,gi 158429<br>024,gi 1584<br>29025,gi 15<br>8431069,gi <br>158431070,<br>gi 1584310<br>71,gi 28461<br>221,gi 9457<br>4271 | 51,687.60 | 100.00% | 21 | 23 | 42 | 0.41% | 71.60% | IPVGPET 2.77<br>LGR                                | 1,038.59 |
| Control | 6018 | RecName<br>:<br>Full=AT<br>P<br>synthase<br>subunit<br>beta,<br>mitochon<br>drial;<br>Flags:<br>Precursor | gi 114543.g<br>i 15842902<br>3,gi 158429<br>024,gi 1584<br>29025,gi 15<br>8431069,gi <br>158431070,<br>gi 1584310<br>71,gi 28461<br>221,gi 9457<br>4271 | 51,687.60 | 100.00% | 21 | 23 | 42 | 0.41% | 71.60% | IVAVIGA 3.14<br>VVDVQF<br>DEGLPPI<br>LNALEV<br>QGR | 3,031.68 |
| Control | 6018 | RecName<br>:<br>Full=AT<br>P<br>synthase<br>subunit<br>beta,<br>mitochon<br>drial;<br>Flags:<br>Precursor | gi 114543.g<br>i 15842902<br>3,gi 158429<br>024,gi 1584<br>29025,gi 15<br>8431069,gi <br>158431070,<br>gi 1584310<br>71,gi 28461<br>221,gi 9457<br>4271 | 51,687.60 | 100.00% | 21 | 23 | 42 | 0.41% | 71.60% | LVLEVA 3.07<br>QHLGES<br>TVR                       | 1,650.92 |
| Control | 6018 | RecName<br>:<br>Full=AT<br>P<br>synthase<br>subunit<br>beta,<br>mitochon<br>drial;<br>Flags:<br>Precursor | gi 114543.g<br>i 15842902<br>3,gi 158429<br>024,gi 1584<br>29025,gi 15<br>8431069,gi <br>158431070,<br>gi 1584310<br>71,gi 28461<br>221,gi 9457<br>4271 | 51,687.60 | 100.00% | 21 | 23 | 42 | 0.41% | 71.60% | QFAAIH 3.98<br>AEAPEF<br>VEMSVE<br>QEILVTG<br>IK   | 3,002.52 |
| Control | 6018 | RecName<br>:<br>Full=AT<br>P<br>synthase<br>subunit<br>beta,<br>mitochon<br>drial;<br>Flags:<br>Precursor | gi 114543.g<br>i 15842902<br>3,gi 158429<br>024,gi 1584<br>29025,gi 15<br>8431069,gi <br>158431070,<br>gi 1584310<br>71,gi 28461<br>221,gi 9457<br>4271 | 51,687.60 | 100.00% | 21 | 23 | 42 | 0.41% | 71.60% | SLQDIIAI 4.01<br>LGMDEL<br>SEEDKL<br>TVSR          | 2,691.38 |

|         |      |                                                                                                           |                                                                                                                                                         |           |         |    |    |    |       |        |                                               |      |          |
|---------|------|-----------------------------------------------------------------------------------------------------------|---------------------------------------------------------------------------------------------------------------------------------------------------------|-----------|---------|----|----|----|-------|--------|-----------------------------------------------|------|----------|
| Control | 6018 | RecName<br>:<br>Full=AT<br>P<br>synthase<br>subunit<br>beta,<br>mitochon<br>drial;<br>Flags:<br>Precursor | gi 114543.g<br>i 15842902<br>3,gi 158429<br>024,gi 1584<br>29025,gi 15<br>8431069,gi <br>158431070,<br>gi 1584310<br>71,gi 28461<br>221,gi 9457<br>4271 | 51,687.60 | 100.00% | 21 | 23 | 42 | 0.41% | 71.60% | TIAMDG<br>TEGLVR                              | 3.14 | 1,278.64 |
| Control | 6018 | RecName<br>:<br>Full=AT<br>P<br>synthase<br>subunit<br>beta,<br>mitochon<br>drial;<br>Flags:<br>Precursor | gi 114543.g<br>i 15842902<br>3,gi 158429<br>024,gi 1584<br>29025,gi 15<br>8431069,gi <br>158431070,<br>gi 1584310<br>71,gi 28461<br>221,gi 9457<br>4271 | 51,687.60 | 100.00% | 21 | 23 | 42 | 0.41% | 71.60% | TVLIMEL<br>INNVAK                             | 3.53 | 1,457.84 |
| Control | 6018 | RecName<br>:<br>Full=AT<br>P<br>synthase<br>subunit<br>beta,<br>mitochon<br>drial;<br>Flags:<br>Precursor | gi 114543.g<br>i 15842902<br>3,gi 158429<br>024,gi 1584<br>29025,gi 15<br>8431069,gi <br>158431070,<br>gi 1584310<br>71,gi 28461<br>221,gi 9457<br>4271 | 51,687.60 | 100.00% | 21 | 23 | 42 | 0.41% | 71.60% | VALTGL<br>TVAEYF<br>R                         | 4.49 | 1,439.79 |
| Control | 6018 | RecName<br>:<br>Full=AT<br>P<br>synthase<br>subunit<br>beta,<br>mitochon<br>drial;<br>Flags:<br>Precursor | gi 114543.g<br>i 15842902<br>3,gi 158429<br>024,gi 1584<br>29025,gi 15<br>8431069,gi <br>158431070,<br>gi 1584310<br>71,gi 28461<br>221,gi 9457<br>4271 | 51,687.60 | 100.00% | 21 | 23 | 42 | 0.41% | 71.60% | VALTGL<br>TVAEYF<br>RDQEGQ<br>DVLLFID<br>NIFR | 3.34 | 3,342.74 |
| Control | 6018 | RecName<br>:<br>Full=AT<br>P<br>synthase<br>subunit<br>beta,<br>mitochon<br>drial;<br>Flags:<br>Precursor | gi 114543.g<br>i 15842902<br>3,gi 158429<br>024,gi 1584<br>29025,gi 15<br>8431069,gi <br>158431070,<br>gi 1584310<br>71,gi 28461<br>221,gi 9457<br>4271 | 51,687.60 | 100.00% | 21 | 23 | 42 | 0.41% | 71.60% | VALVYG<br>QMNEPP<br>GAR                       | 3.87 | 1,617.81 |

|         |      |                                                                                                           |                                                                                                                                                         |           |         |    |    |    |       |        |                                   |      |          |
|---------|------|-----------------------------------------------------------------------------------------------------------|---------------------------------------------------------------------------------------------------------------------------------------------------------|-----------|---------|----|----|----|-------|--------|-----------------------------------|------|----------|
| Control | 6018 | RecName<br>:<br>Full=AT<br>P<br>synthase<br>subunit<br>beta,<br>mitochon<br>drial;<br>Flags:<br>Precursor | gi 114543,g<br>i 15842902<br>3,gi 158429<br>024,gi 1584<br>29025,gi 15<br>8431069,gi <br>158431070,<br>gi 1584310<br>71,gi 28461<br>221,gi 9457<br>4271 | 51,687.60 | 100.00% | 21 | 23 | 42 | 0.41% | 71.60% | VLDSGA<br>PIRIPVG<br>PETLGR       | 3.42 | 1,947.10 |
| Control | 6018 | RecName<br>:<br>Full=AT<br>P<br>synthase<br>subunit<br>beta,<br>mitochon<br>drial;<br>Flags:<br>Precursor | gi 114543,g<br>i 15842902<br>3,gi 158429<br>024,gi 1584<br>29025,gi 15<br>8431069,gi <br>158431070,<br>gi 1584310<br>71,gi 28461<br>221,gi 9457<br>4271 | 51,687.60 | 100.00% | 21 | 23 | 42 | 0.41% | 71.60% | VVDLLA<br>PYAK                    | 2.63 | 1,088.64 |
| Control | 6018 | RecName<br>:<br>Full=Sto<br>matin-<br>like<br>protein 2;<br>Short=SL<br>P-2                               | gi 1185738<br>93,gi 14874<br>5563,gi 816<br>74229,gi 84<br>000113                                                                                       | 38,715.70 | 100.00% | 5  | 8  | 10 | 0.10% | 18.80% | AEQINQ<br>AAGEAS<br>AVLAK         | 4.85 | 1,670.87 |
| Control | 6018 | RecName<br>:<br>Full=Sto<br>matin-<br>like<br>protein 2;<br>Short=SL<br>P-2                               | gi 1185738<br>93,gi 14874<br>5563,gi 816<br>74229,gi 84<br>000113                                                                                       | 38,715.70 | 100.00% | 5  | 8  | 10 | 0.10% | 18.80% | ASYGVE<br>DPEYAV<br>TQLAQT<br>TMR | 3.49 | 2,346.09 |
| Control | 6018 | RecName<br>:<br>Full=Sto<br>matin-<br>like<br>protein 2;<br>Short=SL<br>P-2                               | gi 1185738<br>93,gi 14874<br>5563,gi 816<br>74229,gi 84<br>000113                                                                                       | 38,715.70 | 100.00% | 5  | 8  | 10 | 0.10% | 18.80% | ILEPGLN<br>ILIPVLD<br>R           | 4.18 | 1,675.02 |
| Control | 6018 | RecName<br>:<br>Full=Sto<br>matin-<br>like<br>protein 2;<br>Short=SL<br>P-2                               | gi 1185738<br>93,gi 14874<br>5563,gi 816<br>74229,gi 84<br>000113                                                                                       | 38,715.70 | 100.00% | 5  | 8  | 10 | 0.10% | 18.80% | STDASL<br>DEELDR                  | 3.22 | 1,350.60 |
| Control | 6018 | RecName<br>:<br>Full=Sto<br>matin-<br>like<br>protein 2;<br>Short=SL<br>P-2                               | gi 1185738<br>93,gi 14874<br>5563,gi 816<br>74229,gi 84<br>000113                                                                                       | 38,715.70 | 100.00% | 5  | 8  | 10 | 0.10% | 18.80% | STDASL<br>DEELDR<br>VK            | 2.47 | 1,577.77 |

|         |      |                                          |                                                    |            |         |   |    |    |       |        |                                                |      |          |
|---------|------|------------------------------------------|----------------------------------------------------|------------|---------|---|----|----|-------|--------|------------------------------------------------|------|----------|
| Control | 6018 | PREDIC TED:<br>similar to CD109, partial | gi 1199213<br>75                                   | 142,518.70 | 100.00% | 5 | 6  | 6  | 0.06% | 6.27%  | IPVQLVF<br>K                                   | 2.42 | 943.5976 |
| Control | 6018 | PREDIC TED:<br>similar to CD109, partial | gi 1199213<br>75                                   | 142,518.70 | 100.00% | 5 | 6  | 6  | 0.06% | 6.27%  | LGEVPIT<br>VTAVSP<br>AASDAV<br>TQR             | 3.4  | 2,182.17 |
| Control | 6018 | PREDIC TED:<br>similar to CD109, partial | gi 1199213<br>75                                   | 142,518.70 | 100.00% | 5 | 6  | 6  | 0.06% | 6.27%  | SPVTLT<br>AYIVTSL<br>LGYK                      | 4.15 | 1,826.03 |
| Control | 6018 | PREDIC TED:<br>similar to CD109, partial | gi 1199213<br>75                                   | 142,518.70 | 100.00% | 5 | 6  | 6  | 0.06% | 6.27%  | SYSQSIL<br>LDLTDS<br>TLQTTL<br>K               | 4.13 | 2,227.17 |
| Control | 6018 | PREDIC TED:<br>similar to CD109, partial | gi 1199213<br>75                                   | 142,518.70 | 100.00% | 5 | 6  | 6  | 0.06% | 6.27%  | VGSPFEL<br>VVIGNK                              | 4.87 | 1,358.77 |
| Control | 6018 | S100 calcium binding protein A16         | gi 1113075<br>29,gi 11549<br>7862,gi 122<br>142422 | 11,758.80  | 100.00% | 3 | 3  | 5  | 0.05% | 43.70% | AVVVLV<br>ENFYK                                | 3.17 | 1,280.72 |
| Control | 6018 | S100 calcium binding protein A16         | gi 1113075<br>29,gi 11549<br>7862,gi 122<br>142422 | 11,758.80  | 100.00% | 3 | 3  | 5  | 0.05% | 43.70% | ISFDEY<br>WTLIGGI<br>TSPIANL<br>IR             | 3.57 | 2,479.32 |
| Control | 6018 | S100 calcium binding protein A16         | gi 1113075<br>29,gi 11549<br>7862,gi 122<br>142422 | 11,758.80  | 100.00% | 3 | 3  | 5  | 0.05% | 43.70% | LIQNLDA<br>NHDGR                               | 2.39 | 1,365.69 |
| Control | 6018 | CHMP4 B protein                          | gi 1168745<br>09,gi 19036<br>0743                  | 24,919.20  | 99.80%  | 2 | 2  | 3  | 0.03% | 13.40% | EALENA<br>NTNTEV<br>LK                         | 4.14 | 1,545.78 |
| Control | 6018 | CHMP4 B protein                          | gi 1168745<br>09,gi 19036<br>0743                  | 24,919.20  | 99.80%  | 2 | 2  | 3  | 0.03% | 13.40% | QLAQID<br>GTLSTIE<br>FQR                       | 3.24 | 1,819.96 |
| Control | 6018 | SSR1 protein                             | gi 1515536<br>10,gi 15612<br>0891,gi 187<br>611488 | 32,036.80  | 100.00% | 4 | 5  | 20 | 0.20% | 21.70% | FLVGFT<br>NK                                   | 2.42 | 925.5142 |
| Control | 6018 | SSR1 protein                             | gi 1515536<br>10,gi 15612<br>0891,gi 187<br>611488 | 32,036.80  | 100.00% | 4 | 5  | 20 | 0.20% | 21.70% | GEDFPA<br>NNIVK                                | 3.54 | 1,203.60 |
| Control | 6018 | SSR1 protein                             | gi 1515536<br>10,gi 15612<br>0891,gi 187<br>611488 | 32,036.80  | 100.00% | 4 | 5  | 20 | 0.20% | 21.70% | GTEDFIV<br>ESLDASF<br>R                        | 4.52 | 1,685.80 |
| Control | 6018 | SSR1 protein                             | gi 1515536<br>10,gi 15612<br>0891,gi 187<br>611488 | 32,036.80  | 100.00% | 4 | 5  | 20 | 0.20% | 21.70% | QATFEY<br>SFIPAEP<br>MGGRPF<br>GLVINLN<br>YK   | 2.48 | 3,175.59 |
| Control | 6018 | EH-domain containin g 2                  | gi 1140517<br>16,gi 86822<br>020                   | 61,201.30  | 100.00% | 9 | 12 | 12 | 0.12% | 25.40% | FGTFHSP<br>ALEDAD<br>FDGKPM<br>VLVAGQ<br>YSTGK | 3.7  | 3,201.52 |

|         |      |                                        |                                                 |           |         |   |    |    |       |        |                                   |          |
|---------|------|----------------------------------------|-------------------------------------------------|-----------|---------|---|----|----|-------|--------|-----------------------------------|----------|
| Control | 6018 | EH-domain containin g 2                | gi 114051716,gi 86822020                        | 61,201.30 | 100.00% | 9 | 12 | 12 | 0.12% | 25.40% | GYDFPA VLR 2.37                   | 1,037.54 |
| Control | 6018 | EH-domain containin g 2                | gi 114051716,gi 86822020                        | 61,201.30 | 100.00% | 9 | 12 | 12 | 0.12% | 25.40% | LEGHGL PTNLPR 3.11                | 1,303.71 |
| Control | 6018 | EH-domain containin g 2                | gi 114051716,gi 86822020                        | 61,201.30 | 100.00% | 9 | 12 | 12 | 0.12% | 25.40% | LFELEEQ DLFR 4.45                 | 1,438.72 |
| Control | 6018 | EH-domain containin g 2                | gi 114051716,gi 86822020                        | 61,201.30 | 100.00% | 9 | 12 | 12 | 0.12% | 25.40% | LFELEEQ DLFRDIQ GLPR 4.07         | 2,218.15 |
| Control | 6018 | EH-domain containin g 2                | gi 114051716,gi 86822020                        | 61,201.30 | 100.00% | 9 | 12 | 12 | 0.12% | 25.40% | LSDVDR DGMLDD EEFALAS HLIEAK 3.58 | 2,805.33 |
| Control | 6018 | EH-domain containin g 2                | gi 114051716,gi 86822020                        | 61,201.30 | 100.00% | 9 | 12 | 12 | 0.12% | 25.40% | MQELLM AHDFTK 2.22                | 1,463.70 |
| Control | 6018 | EH-domain containin g 2                | gi 114051716,gi 86822020                        | 61,201.30 | 100.00% | 9 | 12 | 12 | 0.12% | 25.40% | SKYDEIF YNLAPA DGK 4.15           | 1,830.89 |
| Control | 6018 | EH-domain containin g 2                | gi 114051716,gi 86822020                        | 61,201.30 | 100.00% | 9 | 12 | 12 | 0.12% | 25.40% | TSFIQYL LEQEVPSR 3.36             | 1,866.96 |
| Control | 6018 | GTP-binding protein MX2                | gi 13430404,gi 27806835,gi 75066885             | 81,436.40 | 99.80%  | 2 | 2  | 2  | 0.02% | 5.21%  | ALGVEQ DLALPAI AVIGDQ SSGK 3.55   | 2,252.21 |
| Control | 6018 | GTP-binding protein MX2                | gi 13430404,gi 27806835,gi 75066885             | 81,436.40 | 99.80%  | 2 | 2  | 2  | 0.02% | 5.21%  | SSVLEAL SGVALP R 4.9              | 1,398.80 |
| Control | 6018 | coiled-coil-helix domain containin g 3 | gi 59858339,gi 62510470,gi 74354006,gi 78365273 | 26,082.40 | 100.00% | 8 | 8  | 13 | 0.13% | 29.50% | KQDAFY KEQLAR 3.74                | 1,496.79 |
| Control | 6018 | coiled-coil-helix domain containin g 3 | gi 59858339,gi 62510470,gi 74354006,gi 78365273 | 26,082.40 | 100.00% | 8 | 8  | 13 | 0.13% | 29.50% | LSENVID R 2.65                    | 945.5    |
| Control | 6018 | coiled-coil-helix domain containin g 3 | gi 59858339,gi 62510470,gi 74354006,gi 78365273 | 26,082.40 | 100.00% | 8 | 8  | 13 | 0.13% | 29.50% | QNTQQT LSCSAL ASQYMR 4.84         | 2,045.94 |
| Control | 6018 | coiled-coil-helix domain containin g 3 | gi 59858339,gi 62510470,gi 74354006,gi 78365273 | 26,082.40 | 100.00% | 8 | 8  | 13 | 0.13% | 29.50% | RVAEEL ALEQAK 3.21                | 1,356.75 |

|         |      |                                                                                                                                     |           |         |    |    |    |       |        |                                        |      |          |
|---------|------|-------------------------------------------------------------------------------------------------------------------------------------|-----------|---------|----|----|----|-------|--------|----------------------------------------|------|----------|
| Control | 6018 | coiled-coil-helix-9,gi 5985833<br>coiled-coil-helix-70,gi 74354<br>coiled-coil-helix-006,gi 7836<br>domain 5273<br>containin<br>g 3 | 26,082.40 | 100.00% | 8  | 8  | 13 | 0.13% | 29.50% | RVAEEL<br>ALEQAK<br>K                  | 4.68 | 1,484.84 |
| Control | 6018 | coiled-coil-helix-9,gi 5985833<br>coiled-coil-helix-70,gi 74354<br>coiled-coil-helix-006,gi 7836<br>domain 5273<br>containin<br>g 3 | 26,082.40 | 100.00% | 8  | 8  | 13 | 0.13% | 29.50% | RVTFEA<br>DENENIT<br>VVK               | 3.29 | 1,863.94 |
| Control | 6018 | coiled-coil-helix-9,gi 5985833<br>coiled-coil-helix-70,gi 74354<br>coiled-coil-helix-006,gi 7836<br>domain 5273<br>containin<br>g 3 | 26,082.40 | 100.00% | 8  | 8  | 13 | 0.13% | 29.50% | VAEELA<br>LEQAK                        | 4.03 | 1,200.65 |
| Control | 6018 | coiled-coil-helix-9,gi 5985833<br>coiled-coil-helix-70,gi 74354<br>coiled-coil-helix-006,gi 7836<br>domain 5273<br>containin<br>g 3 | 26,082.40 | 100.00% | 8  | 8  | 13 | 0.13% | 29.50% | VAEELA<br>LEQAKK                       | 4.13 | 1,328.74 |
| Control | 6018 | integrin beta 1<br>gi 1111831<br>55,gi 21856<br>3327                                                                                | 88,075.70 | 100.00% | 11 | 14 | 29 | 0.28% | 18.50% | IGFGSFV<br>EK                          | 2.25 | 983.5197 |
| Control | 6018 | integrin beta 1<br>gi 1111831<br>55,gi 21856<br>3327                                                                                | 88,075.70 | 100.00% | 11 | 14 | 29 | 0.28% | 18.50% | LLVFSTD<br>AGFHFA<br>GDGK              | 2.57 | 1,781.89 |
| Control | 6018 | integrin beta 1<br>gi 1111831<br>55,gi 21856<br>3327                                                                                | 88,075.70 | 100.00% | 11 | 14 | 29 | 0.28% | 18.50% | LPEGVTI<br>NYK                         | 3.45 | 1,133.62 |
| Control | 6018 | integrin beta 1<br>gi 1111831<br>55,gi 21856<br>3327                                                                                | 88,075.70 | 100.00% | 11 | 14 | 29 | 0.28% | 18.50% | LQPEDIT<br>QIQPQL<br>VLQLR             | 5.99 | 2,260.27 |
| Control | 6018 | integrin beta 1<br>gi 1111831<br>55,gi 21856<br>3327                                                                                | 88,075.70 | 100.00% | 11 | 14 | 29 | 0.28% | 18.50% | LSENNIQ<br>TIFAVTE<br>EFQPVY<br>K      | 4.84 | 2,470.25 |
| Control | 6018 | integrin beta 1<br>gi 1111831<br>55,gi 21856<br>3327                                                                                | 88,075.70 | 100.00% | 11 | 14 | 29 | 0.28% | 18.50% | NVLSLT<br>DKGEVF<br>NELVGK             | 4.87 | 1,962.05 |
| Control | 6018 | integrin beta 1<br>gi 1111831<br>55,gi 21856<br>3327                                                                                | 88,075.70 | 100.00% | 11 | 14 | 29 | 0.28% | 18.50% | SAVTTV<br>VNPKEY<br>GK                 | 4    | 1,492.80 |
| Control | 6018 | integrin beta 1<br>gi 1111831<br>55,gi 21856<br>3327                                                                                | 88,075.70 | 100.00% | 11 | 14 | 29 | 0.28% | 18.50% | SGEPQTF<br>TLK                         | 2.51 | 1,107.57 |
| Control | 6018 | integrin beta 1<br>gi 1111831<br>55,gi 21856<br>3327                                                                                | 88,075.70 | 100.00% | 11 | 14 | 29 | 0.28% | 18.50% | SKGTAE<br>KLQPEDI<br>TQIQPQQ<br>LVLQLR | 3.12 | 2,961.64 |
| Control | 6018 | integrin beta 1<br>gi 1111831<br>55,gi 21856<br>3327                                                                                | 88,075.70 | 100.00% | 11 | 14 | 29 | 0.28% | 18.50% | SLGTDL<br>MNEMR                        | 2.17 | 1,282.58 |
| Control | 6018 | integrin beta 1<br>gi 1111831<br>55,gi 21856<br>3327                                                                                | 88,075.70 | 100.00% | 11 | 14 | 29 | 0.28% | 18.50% | TVMPYI<br>STTPAK                       | 2.63 | 1,324.68 |
| Control | 6018 | TPM3 protein<br>gi 7915347<br>2                                                                                                     | 29,015.30 | 100.00% | 4  | 4  | 4  | 0.04% | 11.30% | IQLVEEE<br>LDR                         | 3.33 | 1,243.65 |



|         |      |                                                                                                                                                                                                            |                                                                 |           |         |   |   |   |       |        |                              |          |
|---------|------|------------------------------------------------------------------------------------------------------------------------------------------------------------------------------------------------------------|-----------------------------------------------------------------|-----------|---------|---|---|---|-------|--------|------------------------------|----------|
| Control | 6018 | TPM3<br>protein                                                                                                                                                                                            | gi 7915347<br>2                                                 | 29,015.30 | 100.00% | 4 | 4 | 4 | 0.04% | 11.30% | IQLVEEE 4<br>LDRAQE<br>R     | 1,727.89 |
| Control | 6018 | TPM3<br>protein                                                                                                                                                                                            | gi 7915347<br>2                                                 | 29,015.30 | 100.00% | 4 | 4 | 4 | 0.04% | 11.30% | RIQLVEE 3.04<br>ELDRAQ<br>ER | 1,883.99 |
| Control | 6018 | TPM3<br>protein                                                                                                                                                                                            | gi 7915347<br>2                                                 | 29,015.30 | 100.00% | 4 | 4 | 4 | 0.04% | 11.30% | YSQKED 3.48<br>KYEEEIK       | 1,688.80 |
| Control | 6018 | RecName<br>:<br>Full=Volt<br>age-<br>dependen<br>t anion-<br>selective<br>channel<br>protein 3;<br>Short=V<br>DAC-3;<br>AltName:<br>Full=Out<br>er<br>mitochon<br>drial<br>membran<br>e protein<br>porin 3 | gi 1312445<br>2,gi 148878<br>077,gi 2780<br>7415,gi 881<br>0224 | 30,853.30 | 100.00% | 3 | 4 | 5 | 0.05% | 12.30% | LSQNNF 3.6<br>ALGYK          | 1,254.65 |
| Control | 6018 | RecName<br>:<br>Full=Volt<br>age-<br>dependen<br>t anion-<br>selective<br>channel<br>protein 3;<br>Short=V<br>DAC-3;<br>AltName:<br>Full=Out<br>er<br>mitochon<br>drial<br>membran<br>e protein<br>porin 3 | gi 1312445<br>2,gi 148878<br>077,gi 2780<br>7415,gi 881<br>0224 | 30,853.30 | 100.00% | 3 | 4 | 5 | 0.05% | 12.30% | LTLDTIF 3.78<br>VPNTGK       | 1,418.79 |

|         |      |                                                                                                                                                                                                            |                                                                 |           |         |   |   |    |       |        |                                              |      |          |
|---------|------|------------------------------------------------------------------------------------------------------------------------------------------------------------------------------------------------------------|-----------------------------------------------------------------|-----------|---------|---|---|----|-------|--------|----------------------------------------------|------|----------|
| Control | 6018 | RecName<br>:<br>Full=Volt<br>age-<br>dependen<br>t anion-<br>selective<br>channel<br>protein 3;<br>Short=V<br>DAC-3;<br>AltName:<br>Full=Out<br>er<br>mitochon<br>drial<br>membran<br>e protein<br>porin 3 | gi 1312445<br>2,gi 148878<br>077,gi 2780<br>7415,gi 881<br>0224 | 30,853.30 | 100.00% | 3 | 4 | 5  | 0.05% | 12.30% | LTLDTIF<br>VPNTGK<br>K                       | 3.36 | 1,546.88 |
| Control | 6018 | RecName<br>:<br>Full=Volt<br>age-<br>dependen<br>t anion-<br>selective<br>channel<br>protein 3;<br>Short=V<br>DAC-3;<br>AltName:<br>Full=Out<br>er<br>mitochon<br>drial<br>membran<br>e protein<br>porin 3 | gi 1312445<br>2,gi 148878<br>077,gi 2780<br>7415,gi 881<br>0224 | 30,853.30 | 100.00% | 3 | 4 | 5  | 0.05% | 12.30% | LTLSALI<br>DGK                               | 3.22 | 1,030.61 |
| Control | 6018 | SLC25A<br>3 protein                                                                                                                                                                                        | gi 1515560<br>64                                                | 39,986.50 | 100.00% | 4 | 6 | 13 | 0.13% | 11.90% | IQTQPGY<br>ANTLR                             | 3.59 | 1,361.72 |
| Control | 6018 | SLC25A<br>3 protein                                                                                                                                                                                        | gi 1515560<br>64                                                | 39,986.50 | 100.00% | 4 | 6 | 13 | 0.13% | 11.90% | LPRPPPP<br>EMPESL<br>K                       | 4.78 | 1,603.85 |
| Control | 6018 | SLC25A<br>3 protein                                                                                                                                                                                        | gi 1515560<br>64                                                | 39,986.50 | 100.00% | 4 | 6 | 13 | 0.13% | 11.90% | LPRPPPP<br>EMPESL<br>KK                      | 3.87 | 1,731.95 |
| Control | 6018 | SLC25A<br>3 protein                                                                                                                                                                                        | gi 1515560<br>64                                                | 39,986.50 | 100.00% | 4 | 6 | 13 | 0.13% | 11.90% | VLYSNM<br>LGEENA<br>YLWR                     | 2.65 | 1,973.94 |
| Control | 6018 | Mitogen-<br>activated<br>protein<br>kinase<br>kinase 1<br>interactin<br>g protein<br>1                                                                                                                     | gi 1096582<br>69,gi 11549<br>6109,gi 122<br>133616              | 13,632.00 | 99.80%  | 2 | 2 | 2  | 0.02% | 30.60% | ELAPLFE<br>ELR                               | 2.42 | 1,216.66 |
| Control | 6018 | Mitogen-<br>activated<br>protein<br>kinase<br>kinase 1<br>interactin<br>g protein<br>1                                                                                                                     | gi 1096582<br>69,gi 11549<br>6109,gi 122<br>133616              | 13,632.00 | 99.80%  | 2 | 2 | 2  | 0.02% | 30.60% | VANDNA<br>PEHALR<br>PGFLSTF<br>ALATDQ<br>GSK | 2.69 | 2,927.46 |

|         |      |                                                                                                                                                                        |                                                  |           |         |   |   |   |       |        |                                      |          |
|---------|------|------------------------------------------------------------------------------------------------------------------------------------------------------------------------|--------------------------------------------------|-----------|---------|---|---|---|-------|--------|--------------------------------------|----------|
| Control | 6018 | ALCAM/<br>CD166                                                                                                                                                        | gi 1311130<br>4,gi 413867<br>84,gi 47605<br>539  | 64,749.10 | 100.00% | 3 | 3 | 3 | 0.03% | 6.35%  | SVQYDD 2.2<br>VPEYKD<br>R            | 1,613.74 |
| Control | 6018 | ALCAM/<br>CD166                                                                                                                                                        | gi 1311130<br>4,gi 413867<br>84,gi 47605<br>539  | 64,749.10 | 100.00% | 3 | 3 | 3 | 0.03% | 6.35%  | VDVPQN 2.73<br>LMFGK                 | 1,263.64 |
| Control | 6018 | ALCAM/<br>CD166                                                                                                                                                        | gi 1311130<br>4,gi 413867<br>84,gi 47605<br>539  | 64,749.10 | 100.00% | 3 | 3 | 3 | 0.03% | 6.35%  | VFKQPS 2.33<br>KPEIVSK               | 1,486.86 |
| Control | 6018 | RecName<br>:<br>Full=40S<br>ribosomal<br>protein<br>SA;<br>AltName:<br>Full=Lam<br>inin<br>receptor<br>1;<br>AltName:<br>Full=p40;<br>AltName:<br>Full=Prot<br>ein C10 | gi 1220660<br>07,gi 28189<br>773,gi 7358<br>7277 | 18,591.70 | 99.80%  | 2 | 2 | 2 | 0.02% | 17.50% | AIVAIEN 3.64<br>PADVSVI<br>SSR       | 1,740.95 |
| Control | 6018 | RecName<br>:<br>Full=40S<br>ribosomal<br>protein<br>SA;<br>AltName:<br>Full=Lam<br>inin<br>receptor<br>1;<br>AltName:<br>Full=p40;<br>AltName:<br>Full=Prot<br>ein C10 | gi 1220660<br>07,gi 28189<br>773,gi 7358<br>7277 | 18,591.70 | 99.80%  | 2 | 2 | 2 | 0.02% | 17.50% | FAAATG 4.85<br>ATPIAGR               | 1,203.65 |
| Control | 6018 | alpha<br>isoform<br>of<br>regulator<br>y subunit<br>A,<br>protein<br>phosphat<br>ase 2                                                                                 | gi 1462317<br>14,gi 79153<br>525,gi 8269<br>7383 | 65,273.60 | 99.80%  | 2 | 2 | 2 | 0.02% | 5.60%  | IGPILDN 2.2<br>STLQSE<br>VKPVLE<br>K | 2,180.22 |
| Control | 6018 | alpha<br>isoform<br>of<br>regulator<br>y subunit<br>A,<br>protein<br>phosphat<br>ase 2                                                                                 | gi 1462317<br>14,gi 79153<br>525,gi 8269<br>7383 | 65,273.60 | 99.80%  | 2 | 2 | 2 | 0.02% | 5.60%  | VLAMSG 2.62<br>DPNYLH<br>R           | 1,488.73 |

|         |      |                                                                                                                                                                                                                                                         |           |         |   |   |   |       |        |                                               |      |          |
|---------|------|---------------------------------------------------------------------------------------------------------------------------------------------------------------------------------------------------------------------------------------------------------|-----------|---------|---|---|---|-------|--------|-----------------------------------------------|------|----------|
| Control | 6018 | tyrosine 3-gi 2780736<br>monoxy 7,gi 455790<br>genase/tr 8,gi 455791<br>yptophan 3,gi 455791<br>5- 4,gi 455791<br>monoxy 5,gi 455791<br>genase 6,gi 493027<br>activation 3,gi 493027<br>protein, 4,gi 520008<br>zeta 86,gi 73587<br>polypepti 275<br>de | 27,727.90 | 100.00% | 5 | 6 | 8 | 0.08% | 31.80% | GIVDQS<br>QQAYQE<br>AFEISK                    | 4.25 | 2,040.99 |
| Control | 6018 | tyrosine 3-gi 2780736<br>monoxy 7,gi 455790<br>genase/tr 8,gi 455791<br>yptophan 3,gi 455791<br>5- 4,gi 455791<br>monoxy 5,gi 455791<br>genase 6,gi 493027<br>activation 3,gi 493027<br>protein, 4,gi 520008<br>zeta 86,gi 73587<br>polypepti 275<br>de | 27,727.90 | 100.00% | 5 | 6 | 8 | 0.08% | 31.80% | GIVDQS<br>QQAYQE<br>AFEISKK                   | 2.73 | 2,169.08 |
| Control | 6018 | tyrosine 3-gi 2780736<br>monoxy 7,gi 455790<br>genase/tr 8,gi 455791<br>yptophan 3,gi 455791<br>5- 4,gi 455791<br>monoxy 5,gi 455791<br>genase 6,gi 493027<br>activation 3,gi 493027<br>protein, 4,gi 520008<br>zeta 86,gi 73587<br>polypepti 275<br>de | 27,727.90 | 100.00% | 5 | 6 | 8 | 0.08% | 31.80% | LAEQAE<br>RYDDM<br>AACMK                      | 3.11 | 1,860.79 |
| Control | 6018 | tyrosine 3-gi 2780736<br>monoxy 7,gi 455790<br>genase/tr 8,gi 455791<br>yptophan 3,gi 455791<br>5- 4,gi 455791<br>monoxy 5,gi 455791<br>genase 6,gi 493027<br>activation 3,gi 493027<br>protein, 4,gi 520008<br>zeta 86,gi 73587<br>polypepti 275<br>de | 27,727.90 | 100.00% | 5 | 6 | 8 | 0.08% | 31.80% | SVTEQG<br>AELSNE<br>ER                        | 4.93 | 1,548.71 |
| Control | 6018 | tyrosine 3-gi 2780736<br>monoxy 7,gi 455790<br>genase/tr 8,gi 455791<br>yptophan 3,gi 455791<br>5- 4,gi 455791<br>monoxy 5,gi 455791<br>genase 6,gi 493027<br>activation 3,gi 493027<br>protein, 4,gi 520008<br>zeta 86,gi 73587<br>polypepti 275<br>de | 27,727.90 | 100.00% | 5 | 6 | 8 | 0.08% | 31.80% | TAFDEAI<br>AELDTL<br>SEESYK<br>DSTLIM<br>QLLR | 5.05 | 3,318.63 |

|         |      |                                             |                                                                  |           |         |   |   |   |       |        |                                          |          |
|---------|------|---------------------------------------------|------------------------------------------------------------------|-----------|---------|---|---|---|-------|--------|------------------------------------------|----------|
| Control | 6018 | PREDIC TED: similar to ribosomal protein L7 | gi 1199199<br>84,gi 61553<br>181,gi 6246<br>0552,gi 716<br>49267 | 29,152.80 | 100.00% | 5 | 5 | 6 | 0.06% | 20.20% | IALTDNA 3.49<br>LIAR                     | 1,170.68 |
| Control | 6018 | PREDIC TED: similar to ribosomal protein L7 | gi 1199199<br>84,gi 61553<br>181,gi 6246<br>0552,gi 716<br>49267 | 29,152.80 | 100.00% | 5 | 5 | 6 | 0.06% | 20.20% | KVPAVP 2.32<br>ETLK                      | 1,081.66 |
| Control | 6018 | PREDIC TED: similar to ribosomal protein L7 | gi 1199199<br>84,gi 61553<br>181,gi 6246<br>0552,gi 716<br>49267 | 29,152.80 | 100.00% | 5 | 5 | 6 | 0.06% | 20.20% | KVPAVP 2.64<br>ETLKK                     | 1,209.76 |
| Control | 6018 | PREDIC TED: similar to ribosomal protein L7 | gi 1199199<br>84,gi 61553<br>181,gi 6246<br>0552,gi 716<br>49267 | 29,152.80 | 100.00% | 5 | 5 | 6 | 0.06% | 20.20% | SVNELIY 2.79<br>KR                       | 1,121.63 |
| Control | 6018 | PREDIC TED: similar to ribosomal protein L7 | gi 1199199<br>84,gi 61553<br>181,gi 6246<br>0552,gi 716<br>49267 | 29,152.80 | 100.00% | 5 | 5 | 6 | 0.06% | 20.20% | TTHFVE 3.04<br>GGDAGN<br>REDQIN<br>R     | 2,115.98 |
| Control | 6018 | TAPBPL protein                              | gi 1515536<br>00,gi 15612<br>0889                                | 47,099.80 | 99.80%  | 2 | 2 | 2 | 0.02% | 7.47%  | LPLSPQG 2.72<br>TVR                      | 1,067.62 |
| Control | 6018 | TAPBPL protein                              | gi 1515536<br>00,gi 15612<br>0889                                | 47,099.80 | 99.80%  | 2 | 2 | 2 | 0.02% | 7.47%  | QVPVPD 3.54<br>DGSLEG<br>LTDFQV<br>DTLTK | 2,474.23 |
| Control | 6018 | 90-kDa heat shock protein alpha             | gi 3439234<br>3,gi 605927<br>92,gi 75072<br>500                  | 84,716.20 | 100.00% | 3 | 3 | 4 | 0.04% | 12.70% | ADLNNL 4.23<br>GTIAK                     | 1,242.71 |
| Control | 6018 | 90-kDa heat shock protein alpha             | gi 3439234<br>3,gi 605927<br>92,gi 75072<br>500                  | 84,716.20 | 100.00% | 3 | 3 | 4 | 0.04% | 12.70% | EDQTEY 2.7<br>LEER                       | 1,311.57 |
| Control | 6018 | 90-kDa heat shock protein alpha             | gi 3439234<br>3,gi 605927<br>92,gi 75072<br>500                  | 84,716.20 | 100.00% | 3 | 3 | 4 | 0.04% | 12.70% | GVVDSE 4.57<br>DLPLNIS<br>R              | 1,513.79 |
| Control | 6018 | 90-kDa heat shock protein alpha             | gi 3439234<br>3,gi 605927<br>92,gi 75072<br>500                  | 84,716.20 | 100.00% | 3 | 3 | 4 | 0.04% | 12.70% | HLEINPD 3.49<br>HSIIETL<br>R             | 1,786.94 |
| Control | 6018 | 90-kDa heat shock protein alpha             | gi 3439234<br>3,gi 605927<br>92,gi 75072<br>500                  | 84,716.20 | 100.00% | 3 | 3 | 4 | 0.04% | 12.70% | NPDDITN 3.6<br>EEYGEF<br>YK              | 1,833.78 |
| Control | 6018 | 90-kDa heat shock protein alpha             | gi 3439234<br>3,gi 605927<br>92,gi 75072<br>500                  | 84,716.20 | 100.00% | 3 | 3 | 4 | 0.04% | 12.70% | TLTIVDT 4.31<br>GIGMTK                   | 1,365.73 |

|         |      |                                                                                                                         |                                                                                     |           |         |   |    |    |       |        |                                              |      |          |
|---------|------|-------------------------------------------------------------------------------------------------------------------------|-------------------------------------------------------------------------------------|-----------|---------|---|----|----|-------|--------|----------------------------------------------|------|----------|
| Control | 6018 | 90-kDa<br>heat<br>shock<br>protein<br>alpha                                                                             | gi 3439234<br>3,gi 605927<br>92,gi 75072<br>500                                     | 84,716.20 | 100.00% | 3 | 3  | 4  | 0.04% | 12.70% | YESLTD<br>PSKLDS<br>GK                       | 3.95 | 1,539.75 |
| Control | 6018 | PREDIC<br>TED:<br>similar to<br>histone<br>cluster 1,<br>H2bd                                                           | gi 1199157<br>07,gi 11991<br>5717,gi 119<br>915727,gi 1<br>19936491,g<br>i 82697375 | 13,888.60 | 100.00% | 4 | 4  | 13 | 0.13% | 30.20% | AMGIMN<br>SFVNDIF<br>ER                      | 2.85 | 1,759.81 |
| Control | 6018 | PREDIC<br>TED:<br>similar to<br>histone<br>cluster 1,<br>H2bd                                                           | gi 1199157<br>07,gi 11991<br>5717,gi 119<br>915727,gi 1<br>19936491,g<br>i 82697375 | 13,888.60 | 100.00% | 4 | 4  | 13 | 0.13% | 30.20% | ESYSVY<br>VYK                                | 2.3  | 1,137.55 |
| Control | 6018 | PREDIC<br>TED:<br>similar to<br>histone<br>cluster 1,<br>H2bd                                                           | gi 1199157<br>07,gi 11991<br>5717,gi 119<br>915727,gi 1<br>19936491,g<br>i 82697375 | 13,888.60 | 100.00% | 4 | 4  | 13 | 0.13% | 30.20% | KESYSV<br>YVYK                               | 3.27 | 1,265.64 |
| Control | 6018 | PREDIC<br>TED:<br>similar to<br>histone<br>cluster 1,<br>H2bd                                                           | gi 1199157<br>07,gi 11991<br>5717,gi 119<br>915727,gi 1<br>19936491,g<br>i 82697375 | 13,888.60 | 100.00% | 4 | 4  | 13 | 0.13% | 30.20% | STITSREI<br>QTAVR                            | 2.96 | 1,461.80 |
| Control | 6018 | pyruvate<br>kinase 3                                                                                                    | gi 1462317<br>36,gi 19467<br>0470,gi 735<br>87283                                   | 61,410.20 | 100.00% | 3 | 3  | 3  | 0.03% | 9.20%  | EATESFA<br>SDPILYR<br>PVAVAL<br>DTKGPEI<br>R | 4.04 | 3,045.59 |
| Control | 6018 | pyruvate<br>kinase 3                                                                                                    | gi 1462317<br>36,gi 19467<br>0470,gi 735<br>87283                                   | 61,410.20 | 100.00% | 3 | 3  | 3  | 0.03% | 9.20%  | GDLGIEI<br>PAEK                              | 3.22 | 1,141.61 |
| Control | 6018 | pyruvate<br>kinase 3                                                                                                    | gi 1462317<br>36,gi 19467<br>0470,gi 735<br>87283                                   | 61,410.20 | 100.00% | 3 | 3  | 3  | 0.03% | 9.20%  | IYVDDG<br>LISLLVK                            | 4    | 1,447.84 |
| Control | 6018 | guanine<br>nucleotid<br>e binding<br>protein<br>(G<br>protein),<br>alpha<br>inhibiting<br>activity<br>polypepti<br>de 2 | gi 1982821<br>35                                                                    | 40,460.10 | 100.00% | 8 | 10 | 19 | 0.19% | 25.60% | AMGNLQ<br>IDFADPS<br>R                       | 4.36 | 1,534.73 |
| Control | 6018 | guanine<br>nucleotid<br>e binding<br>protein<br>(G<br>protein),<br>alpha<br>inhibiting<br>activity<br>polypepti<br>de 2 | gi 1982821<br>35                                                                    | 40,460.10 | 100.00% | 8 | 10 | 19 | 0.19% | 25.60% | AMGNLQ<br>IDFADPS<br>RADDAR                  | 2.83 | 2,078.96 |

|         |      |                                                                                                                         |                  |           |         |   |    |    |       |        |                                |      |          |
|---------|------|-------------------------------------------------------------------------------------------------------------------------|------------------|-----------|---------|---|----|----|-------|--------|--------------------------------|------|----------|
| Control | 6018 | guanine<br>nucleotid<br>e binding<br>protein<br>(G<br>protein),<br>alpha<br>inhibiting<br>activity<br>polypepti<br>de 2 | gi 1982821<br>35 | 40,460.10 | 100.00% | 8 | 10 | 19 | 0.19% | 25.60% | AVVYSN<br>TIQSIMA<br>IVK       | 3.56 | 1,752.96 |
| Control | 6018 | guanine<br>nucleotid<br>e binding<br>protein<br>(G<br>protein),<br>alpha<br>inhibiting<br>activity<br>polypepti<br>de 2 | gi 1982821<br>35 | 40,460.10 | 100.00% | 8 | 10 | 19 | 0.19% | 25.60% | EYQLND<br>SAAYYL<br>NDLER      | 5.22 | 2,076.95 |
| Control | 6018 | guanine<br>nucleotid<br>e binding<br>protein<br>(G<br>protein),<br>alpha<br>inhibiting<br>activity<br>polypepti<br>de 2 | gi 1982821<br>35 | 40,460.10 | 100.00% | 8 | 10 | 19 | 0.19% | 25.60% | IAQSDYI<br>PTQQDV<br>LR        | 3.7  | 1,746.90 |
| Control | 6018 | guanine<br>nucleotid<br>e binding<br>protein<br>(G<br>protein),<br>alpha<br>inhibiting<br>activity<br>polypepti<br>de 2 | gi 1982821<br>35 | 40,460.10 | 100.00% | 8 | 10 | 19 | 0.19% | 25.60% | LLLLGA<br>GESGK                | 3.36 | 1,057.63 |
| Control | 6018 | guanine<br>nucleotid<br>e binding<br>protein<br>(G<br>protein),<br>alpha<br>inhibiting<br>activity<br>polypepti<br>de 2 | gi 1982821<br>35 | 40,460.10 | 100.00% | 8 | 10 | 19 | 0.19% | 25.60% | SREYQL<br>NDSAA<br>YLNDLE<br>R | 4.91 | 2,320.08 |
| Control | 6018 | guanine<br>nucleotid<br>e binding<br>protein<br>(G<br>protein),<br>alpha<br>inhibiting<br>activity<br>polypepti<br>de 2 | gi 1982821<br>35 | 40,460.10 | 100.00% | 8 | 10 | 19 | 0.19% | 25.60% | YDEAAS<br>YIQSK                | 2.91 | 1,274.59 |

|         |      |                                                                                                                                                  |                                                                  |           |         |   |   |   |       |        |                                                     |          |
|---------|------|--------------------------------------------------------------------------------------------------------------------------------------------------|------------------------------------------------------------------|-----------|---------|---|---|---|-------|--------|-----------------------------------------------------|----------|
| Control | 6018 | Paraoxon<br>ase 2                                                                                                                                | gi 1099399<br>19,gi 61553<br>203,gi 6188<br>8862,gi 716<br>48804 | 39,404.60 | 100.00% | 3 | 4 | 6 | 0.06% | 12.70% | LLIGHTLY 2.57<br>HR                                 | 1,085.65 |
| Control | 6018 | Paraoxon<br>ase 2                                                                                                                                | gi 1099399<br>19,gi 61553<br>203,gi 6188<br>8862,gi 716<br>48804 | 39,404.60 | 100.00% | 3 | 4 | 6 | 0.06% | 12.70% | VVAEGF 4.43<br>DSANGI<br>NISPKK                     | 1,961.00 |
| Control | 6018 | Paraoxon<br>ase 2                                                                                                                                | gi 1099399<br>19,gi 61553<br>203,gi 6188<br>8862,gi 716<br>48804 | 39,404.60 | 100.00% | 3 | 4 | 6 | 0.06% | 12.70% | YIYVADI 2.23<br>LAHEIHV<br>LEK                      | 2,026.10 |
| Control | 6018 | RecName<br>:<br>Full=Co<br>mplement<br>component<br>1 Q<br>subcomp<br>onent-<br>binding<br>protein,<br>mitochon<br>drial;<br>Flags:<br>Precursor | gi 1153117<br>84,gi 74354<br>078,gi 7773<br>6001                 | 30,588.80 | 100.00% | 4 | 5 | 8 | 0.08% | 24.50% | AEEQEP 4.46<br>ELTSTPN<br>FVVEVT<br>K               | 2,247.10 |
| Control | 6018 | RecName<br>:<br>Full=Co<br>mplement<br>component<br>1 Q<br>subcomp<br>onent-<br>binding<br>protein,<br>mitochon<br>drial;<br>Flags:<br>Precursor | gi 1153117<br>84,gi 74354<br>078,gi 7773<br>6001                 | 30,588.80 | 100.00% | 4 | 5 | 8 | 0.08% | 24.50% | AFVDFL 1.97<br>SDEIKKE<br>K                         | 1,669.83 |
| Control | 6018 | RecName<br>:<br>Full=Co<br>mplement<br>component<br>1 Q<br>subcomp<br>onent-<br>binding<br>protein,<br>mitochon<br>drial;<br>Flags:<br>Precursor | gi 1153117<br>84,gi 74354<br>078,gi 7773<br>6001                 | 30,588.80 | 100.00% | 4 | 5 | 8 | 0.08% | 24.50% | GVDNTF 4.74<br>ADELVE<br>LSTALE<br>HQEYISF<br>LEDLK | 3,425.66 |



|         |      |                                                                                                                                                  |                                                                     |           |         |   |   |   |       |        |                                                             |          |
|---------|------|--------------------------------------------------------------------------------------------------------------------------------------------------|---------------------------------------------------------------------|-----------|---------|---|---|---|-------|--------|-------------------------------------------------------------|----------|
| Control | 6018 | RecName<br>:<br>Full=Co<br>mplement<br>component<br>1 Q<br>subcomp<br>onent-<br>binding<br>protein,<br>mitochon<br>drial;<br>Flags:<br>Precursor | gi 1153117<br>84,gi 74354<br>078,gi 7773<br>6001                    | 30,588.80 | 100.00% | 4 | 5 | 8 | 0.08% | 24.50% | GVDNTF 4.04<br>ADELVE<br>LSTALE<br>HQEYISF<br>LEDLKG<br>FVK | 3,856.92 |
| Control | 6018 | ARF1<br>protein                                                                                                                                  | gi 1463273<br>84,gi 28603<br>778,gi 5985<br>8233,gi 627<br>51462    | 20,583.70 | 99.80%  | 2 | 2 | 2 | 0.02% | 16.00% | ILMVGL 2.85<br>DAAGK                                        | 1,103.61 |
| Control | 6018 | ARF1<br>protein                                                                                                                                  | gi 1463273<br>84,gi 28603<br>778,gi 5985<br>8233,gi 627<br>51462    | 20,583.70 | 99.80%  | 2 | 2 | 2 | 0.02% | 16.00% | MLAEDE 3.6<br>LRDAVL<br>LVFANK                              | 2,063.08 |
| Control | 6018 | RecName<br>:<br>Full=Ann<br>exin A3;<br>AltName:<br>Full=Ann<br>exin-3;<br>AltName:<br>Full=Ann<br>exin III                                      | gi 1152998<br>47,gi 74356<br>332,gi 7836<br>9184                    | 36,125.00 | 99.80%  | 2 | 2 | 2 | 0.02% | 5.57%  | SEIDLLD 2.83<br>IR                                          | 1,073.58 |
| Control | 6018 | RecName<br>:<br>Full=Ann<br>exin A3;<br>AltName:<br>Full=Ann<br>exin-3;<br>AltName:<br>Full=Ann<br>exin III                                      | gi 1152998<br>47,gi 74356<br>332,gi 7836<br>9184                    | 36,125.00 | 99.80%  | 2 | 2 | 2 | 0.02% | 5.57%  | TLISILTE 2.55<br>R                                          | 1,045.63 |
| Control | 6018 | Catenin<br>(cadherin-<br>associate<br>d<br>protein),<br>beta 1,<br>88kDa                                                                         | gi 1113046<br>24,gi 11549<br>7488,gi 122<br>145603,gi 1<br>52941124 | 85,493.00 | 100.00% | 5 | 6 | 9 | 0.09% | 11.00% | GLNTIPL 3.79<br>FVQLLY<br>SPIENIQ<br>R                      | 2,428.36 |
| Control | 6018 | Catenin<br>(cadherin-<br>associate<br>d<br>protein),<br>beta 1,<br>88kDa                                                                         | gi 1113046<br>24,gi 11549<br>7488,gi 122<br>145603,gi 1<br>52941124 | 85,493.00 | 100.00% | 5 | 6 | 9 | 0.09% | 11.00% | LHYGLP 3.01<br>VVVK                                         | 1,124.68 |

|         |      |                                                                                           |            |           |         |   |   |   |       |        |                                                   |          |
|---------|------|-------------------------------------------------------------------------------------------|------------|-----------|---------|---|---|---|-------|--------|---------------------------------------------------|----------|
| Control | 6018 | Catenin (cadherin-24,gi 11549 associate 7488,gi 122 d 145603,gi 1 protein), beta 1, 88kDa | gi 1113046 | 85,493.00 | 100.00% | 5 | 6 | 9 | 0.09% | 11.00% | LLNDED 3.08<br>QVVVVK                             | 1,385.73 |
| Control | 6018 | Catenin (cadherin-24,gi 11549 associate 7488,gi 122 d 145603,gi 1 protein), beta 1, 88kDa | gi 1113046 | 85,493.00 | 100.00% | 5 | 6 | 9 | 0.09% | 11.00% | MLGSPV 3.31<br>DSVLFY<br>AITLHN<br>LLLHQE<br>GAK  | 3,083.62 |
| Control | 6018 | Catenin (cadherin-24,gi 11549 associate 7488,gi 122 d 145603,gi 1 protein), beta 1, 88kDa | gi 1113046 | 85,493.00 | 100.00% | 5 | 6 | 9 | 0.09% | 11.00% | TSMGGT 4.45<br>QQQFVE<br>GVR                      | 1,640.77 |
| Control | 6018 | CDP-diacylglycerol synthase (phosphatidate cytidyltransferase 2)                          | gi 1173065 | 51,340.60 | 100.00% | 4 | 4 | 4 | 0.04% | 15.30% | EPEAPPE 2.05<br>DKESES<br>EAKADG<br>ETASDS<br>ESR | 2,977.27 |
| Control | 6018 | CDP-diacylglycerol synthase (phosphatidate cytidyltransferase 2)                          | gi 1173065 | 51,340.60 | 100.00% | 4 | 4 | 4 | 0.04% | 15.30% | LVQQFL 1.71<br>TLRPDQ<br>QLHIFNT<br>LK            | 2,552.44 |
| Control | 6018 | CDP-diacylglycerol synthase (phosphatidate cytidyltransferase 2)                          | gi 1173065 | 51,340.60 | 100.00% | 4 | 4 | 4 | 0.04% | 15.30% | SHLTDK 3.37<br>GMLTAA<br>TEDK                     | 1,733.84 |
| Control | 6018 | CDP-diacylglycerol synthase (phosphatidate cytidyltransferase 2)                          | gi 1173065 | 51,340.60 | 100.00% | 4 | 4 | 4 | 0.04% | 15.30% | VAREPE 2.42<br>APPEDK<br>ESESEAK                  | 2,097.99 |
| Control | 6018 | SET translocation (myeloid leukemia-associated)                                           | gi 1529411 | 32,099.40 | 99.80%  | 2 | 2 | 2 | 0.02% | 8.66%  | IDFYFDE 3.27<br>NPYFEN<br>K                       | 1,840.81 |

|         |      |                                                                      |                                                  |            |         |    |    |    |       |       |                                    |      |          |
|---------|------|----------------------------------------------------------------------|--------------------------------------------------|------------|---------|----|----|----|-------|-------|------------------------------------|------|----------|
| Control | 6018 | SET<br>translocat<br>ion<br>(myeloid<br>leukemia-<br>associate<br>d) | gi 1529411<br>92.gi 83638<br>675.gi 8437<br>0163 | 32,099.40  | 99.80%  | 2  | 2  | 2  | 0.02% | 8.66% | VEVTEF<br>EDIK                     | 3.67 | 1,208.60 |
| Control | 6018 | PREDIC<br>TED:<br>collagen,<br>type XII,<br>alpha 1<br>isoform 1     | gi 1946697<br>78                                 | 351,243.80 | 100.00% | 10 | 10 | 11 | 0.11% | 5.05% | FNQMLN<br>QIPNDY<br>HSSR           | 3.99 | 1,979.90 |
| Control | 6018 | PREDIC<br>TED:<br>collagen,<br>type XII,<br>alpha 1<br>isoform 1     | gi 1946697<br>78                                 | 351,243.80 | 100.00% | 10 | 10 | 11 | 0.11% | 5.05% | GLTSSEP<br>VSIMEK                  | 3.13 | 1,393.69 |
| Control | 6018 | PREDIC<br>TED:<br>collagen,<br>type XII,<br>alpha 1<br>isoform 1     | gi 1946697<br>78                                 | 351,243.80 | 100.00% | 10 | 10 | 11 | 0.11% | 5.05% | GPGDLE<br>APSNLV<br>LSER           | 4.06 | 1,653.84 |
| Control | 6018 | PREDIC<br>TED:<br>collagen,<br>type XII,<br>alpha 1<br>isoform 1     | gi 1946697<br>78                                 | 351,243.80 | 100.00% | 10 | 10 | 11 | 0.11% | 5.05% | IYSPV<br>GDPIDEY<br>TTVPGR         | 3.65 | 2,193.11 |
| Control | 6018 | PREDIC<br>TED:<br>collagen,<br>type XII,<br>alpha 1<br>isoform 1     | gi 1946697<br>78                                 | 351,243.80 | 100.00% | 10 | 10 | 11 | 0.11% | 5.05% | ITYQPST<br>GEGNEQ<br>TTTIGGR       | 4.58 | 2,110.01 |
| Control | 6018 | PREDIC<br>TED:<br>collagen,<br>type XII,<br>alpha 1<br>isoform 1     | gi 1946697<br>78                                 | 351,243.80 | 100.00% | 10 | 10 | 11 | 0.11% | 5.05% | IVEVFEI<br>GPK                     | 2.74 | 1,130.65 |
| Control | 6018 | PREDIC<br>TED:<br>collagen,<br>type XII,<br>alpha 1<br>isoform 1     | gi 1946697<br>78                                 | 351,243.80 | 100.00% | 10 | 10 | 11 | 0.11% | 5.05% | LKPDTP<br>YTITVSS<br>LYPDGE<br>GGR | 3.53 | 2,366.19 |
| Control | 6018 | PREDIC<br>TED:<br>collagen,<br>type XII,<br>alpha 1<br>isoform 1     | gi 1946697<br>78                                 | 351,243.80 | 100.00% | 10 | 10 | 11 | 0.11% | 5.05% | NIGVEVF<br>SLGIK                   | 3.32 | 1,275.73 |
| Control | 6018 | PREDIC<br>TED:<br>collagen,<br>type XII,<br>alpha 1<br>isoform 1     | gi 1946697<br>78                                 | 351,243.80 | 100.00% | 10 | 10 | 11 | 0.11% | 5.05% | NNVILQP<br>LQPDTP<br>YK            | 3.68 | 1,739.93 |
| Control | 6018 | PREDIC<br>TED:<br>collagen,<br>type XII,<br>alpha 1<br>isoform 1     | gi 1946697<br>78                                 | 351,243.80 | 100.00% | 10 | 10 | 11 | 0.11% | 5.05% | SLPADVI<br>HTVIENL<br>QPETK        | 2.88 | 2,104.13 |

|         |      |                                                                                                                    |                                                      |           |         |   |   |   |       |        |                                         |          |
|---------|------|--------------------------------------------------------------------------------------------------------------------|------------------------------------------------------|-----------|---------|---|---|---|-------|--------|-----------------------------------------|----------|
| Control | 6018 | V-ral<br>simian<br>leukemia<br>viral<br>oncogene<br>homolog<br>A (ras<br>related)                                  | gi 7358651<br>3,gi 777362<br>31,gi 95768<br>203      | 23,522.20 | 100.00% | 3 | 4 | 5 | 0.05% | 13.10% | ANVDKV 4.93<br>FFDLMR                   | 1,470.74 |
| Control | 6018 | V-ral<br>simian<br>leukemia<br>viral<br>oncogene<br>homolog<br>A (ras<br>related)                                  | gi 7358651<br>3,gi 777362<br>31,gi 95768<br>203      | 23,522.20 | 100.00% | 3 | 4 | 5 | 0.05% | 13.10% | VFFDLM 2.07<br>R                        | 943.4707 |
| Control | 6018 | V-ral<br>simian<br>leukemia<br>viral<br>oncogene<br>homolog<br>A (ras<br>related)                                  | gi 7358651<br>3,gi 777362<br>31,gi 95768<br>203      | 23,522.20 | 100.00% | 3 | 4 | 5 | 0.05% | 13.10% | VKEDEN 5.18<br>VPFLLV<br>GNK            | 1,700.92 |
| Control | 6018 | NADH<br>dehydrog<br>enase<br>(ubiquino<br>ne) 39<br>kDa<br>subunit                                                 | gi 230,gi 28<br>603782,gi 4<br>64254,gi 74<br>267974 | 37,737.50 | 99.80%  | 2 | 2 | 2 | 0.02% | 10.60% | LLQYAD 3.66<br>ALEHLLS<br>TGQGVV<br>LER | 2,425.31 |
| Control | 6018 | NADH<br>dehydrog<br>enase<br>(ubiquino<br>ne) 39<br>kDa<br>subunit                                                 | gi 230,gi 28<br>603782,gi 4<br>64254,gi 74<br>267974 | 37,737.50 | 99.80%  | 2 | 2 | 2 | 0.02% | 10.60% | LQYGPL 3.49<br>AYILGEK                  | 1,464.81 |
| Control | 6018 | PREDIC<br>TED:<br>similar to<br>small<br>GTP<br>binding<br>protein<br>RAB23                                        | gi 1946775<br>45                                     | 37,951.40 | 99.80%  | 2 | 2 | 3 | 0.03% | 9.91%  | LKQQIAE 4.18<br>NPESMH<br>SSSNK         | 2,043.98 |
| Control | 6018 | PREDIC<br>TED:<br>similar to<br>small<br>GTP<br>binding<br>protein<br>RAB23                                        | gi 1946775<br>45                                     | 37,951.40 | 99.80%  | 2 | 2 | 3 | 0.03% | 9.91%  | VVAEVG 3.88<br>DIPTALV<br>QNK           | 1,652.92 |
| Control | 6018 | RecName<br>:<br>Full=Tra<br>nsmembr<br>ane<br>emp24<br>domain-<br>containin<br>g protein<br>I; Flags:<br>Precursor | gi 1141522<br>89,gi 83638<br>714,gi 8437<br>0158     | 25,119.90 | 99.80%  | 2 | 4 | 6 | 0.06% | 11.50% | KADGVH 3.94<br>TVEPTE<br>AGDYK          | 1,816.87 |

|         |      |                                                                            |                                                                                              |           |         |   |   |   |       |        |                        |      |          |
|---------|------|----------------------------------------------------------------------------|----------------------------------------------------------------------------------------------|-----------|---------|---|---|---|-------|--------|------------------------|------|----------|
| Control | 6018 | RecName : Full=Transmembrane domain-containing protein 1; Flags: Precursor | gi 114152289,gi 83638714,gi 84370158                                                         | 25,119.90 | 99.80%  | 2 | 4 | 6 | 0.06% | 11.50% | SIQVLTL LR             | 3.08 | 1,042.66 |
| Control | 6018 | growth and transformation-dependent protein                                | gi 114051522,gi 126258169,gi 84201630                                                        | 17,719.20 | 100.00% | 3 | 3 | 3 | 0.03% | 20.50% | FKKEDEI PETVSFE MLDAAK | 3.34 | 2,343.14 |
| Control | 6018 | growth and transformation-dependent protein                                | gi 114051522,gi 126258169,gi 84201630                                                        | 17,719.20 | 100.00% | 3 | 3 | 3 | 0.03% | 20.50% | NETLTSL NLEK           | 2.64 | 1,261.66 |
| Control | 6018 | growth and transformation-dependent protein                                | gi 114051522,gi 126258169,gi 84201630                                                        | 17,719.20 | 100.00% | 3 | 3 | 3 | 0.03% | 20.50% | RNETLT SLNLEK          | 3.74 | 1,417.76 |
| Control | 6018 | unnamed protein product                                                    | gi 110292444,gi 1351907,gi 148744077,gi 162648,gi 2190337,gi 23307791,gi 30794280,gi 3336842 | 69,296.20 | 100.00% | 5 | 6 | 7 | 0.07% | 9.72%  | DAFLGS FLYEYS R        | 4.52 | 1,567.74 |
| Control | 6018 | unnamed protein product                                                    | gi 110292444,gi 1351907,gi 148744077,gi 162648,gi 2190337,gi 23307791,gi 30794280,gi 3336842 | 69,296.20 | 100.00% | 5 | 6 | 7 | 0.07% | 9.72%  | FKDLGE EHFk            | 3.56 | 1,249.62 |
| Control | 6018 | unnamed protein product                                                    | gi 110292444,gi 1351907,gi 148744077,gi 162648,gi 2190337,gi 23307791,gi 30794280,gi 3336842 | 69,296.20 | 100.00% | 5 | 6 | 7 | 0.07% | 9.72%  | HLVDEP QNLIK           | 3.22 | 1,305.72 |
| Control | 6018 | unnamed protein product                                                    | gi 110292444,gi 1351907,gi 148744077,gi 162648,gi 2190337,gi 23307791,gi 30794280,gi 3336842 | 69,296.20 | 100.00% | 5 | 6 | 7 | 0.07% | 9.72%  | KVPQVS TPTLVE VSR      | 4.17 | 1,639.94 |

|         |      |                                                      |                                                                                              |           |         |    |    |    |       |        |                                        |      |          |
|---------|------|------------------------------------------------------|----------------------------------------------------------------------------------------------|-----------|---------|----|----|----|-------|--------|----------------------------------------|------|----------|
| Control | 6018 | unnamed protein product                              | gi 110292444,gi 1351907,gi 148744077,gi 162648,gi 2190337,gi 23307791,gi 30794280,gi 3336842 | 69,296.20 | 100.00% | 5  | 6  | 7  | 0.07% | 9.72%  | LVNELT EFAK                            | 3.36 | 1,163.63 |
| Control | 6018 | polymerase I and transcript release factor isoform 2 | gi 162287374                                                                                 | 43,446.30 | 100.00% | 12 | 15 | 32 | 0.31% | 26.90% | IIGAVDQ IQLTQA QLEER                   | 4.82 | 2,025.10 |
| Control | 6018 | polymerase I and transcript release factor isoform 2 | gi 162287374                                                                                 | 43,446.30 | 100.00% | 12 | 15 | 32 | 0.31% | 26.90% | IREGQVE VLK                            | 3.92 | 1,170.68 |
| Control | 6018 | polymerase I and transcript release factor isoform 2 | gi 162287374                                                                                 | 43,446.30 | 100.00% | 12 | 15 | 32 | 0.31% | 26.90% | KLEVNE AELLR                           | 4.4  | 1,313.74 |
| Control | 6018 | polymerase I and transcript release factor isoform 2 | gi 162287374                                                                                 | 43,446.30 | 100.00% | 12 | 15 | 32 | 0.31% | 26.90% | KSFTPD HVVYAR                          | 2.85 | 1,419.74 |
| Control | 6018 | polymerase I and transcript release factor isoform 2 | gi 162287374                                                                                 | 43,446.30 | 100.00% | 12 | 15 | 32 | 0.31% | 26.90% | LEVNEA ELLR                            | 3.36 | 1,185.65 |
| Control | 6018 | polymerase I and transcript release factor isoform 2 | gi 162287374                                                                                 | 43,446.30 | 100.00% | 12 | 15 | 32 | 0.31% | 26.90% | QAEMEG AVQSIQ GELSK                    | 4.26 | 1,820.87 |
| Control | 6018 | polymerase I and transcript release factor isoform 2 | gi 162287374                                                                                 | 43,446.30 | 100.00% | 12 | 15 | 32 | 0.31% | 26.90% | SDQVNG VLVLSLL DK                      | 4.06 | 1,599.90 |
| Control | 6018 | polymerase I and transcript release factor isoform 2 | gi 162287374                                                                                 | 43,446.30 | 100.00% | 12 | 15 | 32 | 0.31% | 26.90% | SDQVNG VLVLSLL DKIIIGAV DQIQLT QAQLEER | 5.54 | 3,605.98 |
| Control | 6018 | polymerase I and transcript release factor isoform 2 | gi 162287374                                                                                 | 43,446.30 | 100.00% | 12 | 15 | 32 | 0.31% | 26.90% | SFTPDH VVYAR                           | 3.07 | 1,291.64 |
| Control | 6018 | polymerase I and transcript release factor isoform 2 | gi 162287374                                                                                 | 43,446.30 | 100.00% | 12 | 15 | 32 | 0.31% | 26.90% | VMIYQD EVK                             | 3.21 | 1,140.56 |

|         |      |                                                      |                                       |           |         |    |    |    |       |        |                              |      |          |
|---------|------|------------------------------------------------------|---------------------------------------|-----------|---------|----|----|----|-------|--------|------------------------------|------|----------|
| Control | 6018 | polymerase I and transcript release factor isoform 2 | gi 162287374                          | 43,446.30 | 100.00% | 12 | 15 | 32 | 0.31% | 26.90% | VMIYQD<br>EVKLLPA<br>K       | 3.57 | 1,549.83 |
| Control | 6018 | polymerase I and transcript release factor isoform 2 | gi 162287374                          | 43,446.30 | 100.00% | 12 | 15 | 32 | 0.31% | 26.90% | VPPFTFH<br>VK                | 1.97 | 1,071.60 |
| Control | 6018 | RNA binding motif (RNP1, RRM) protein 3              | gi 73587236,gi 77735675               | 9,735.50  | 100.00% | 3  | 3  | 3  | 0.03% | 55.60% | ALEDHF<br>SSFGPIS<br>EVVVVK  | 4.93 | 2,060.07 |
| Control | 6018 | RNA binding motif (RNP1, RRM) protein 3              | gi 73587236,gi 77735675               | 9,735.50  | 100.00% | 3  | 3  | 3  | 0.03% | 55.60% | GFGFITF<br>TNPEHA<br>SNAMR   | 3.57 | 2,012.93 |
| Control | 6018 | RNA binding motif (RNP1, RRM) protein 3              | gi 73587236,gi 77735675               | 9,735.50  | 100.00% | 3  | 3  | 3  | 0.03% | 55.60% | LFVGGL<br>NFNTDE<br>R        | 3.48 | 1,481.74 |
| Control | 6018 | ITGA3 protein                                        | gi 151556279,gi 156120449             | 45,035.90 | 99.80%  | 2  | 2  | 2  | 0.02% | 6.34%  | EAGNPG<br>SLFGYS<br>VALHR    | 4.05 | 1,774.89 |
| Control | 6018 | ITGA3 protein                                        | gi 151556279,gi 156120449             | 45,035.90 | 99.80%  | 2  | 2  | 2  | 0.02% | 6.34%  | YLLLAG<br>APR                | 2.73 | 973.583  |
| Control | 6018 | B-cell receptor-associated protein 31                | gi 59858303,gi 62460574,gi 74354925   | 27,884.40 | 100.00% | 3  | 6  | 13 | 0.13% | 16.70% | KYMEEN<br>DLLKK              | 4.37 | 1,426.72 |
| Control | 6018 | B-cell receptor-associated protein 31                | gi 59858303,gi 62460574,gi 74354925   | 27,884.40 | 100.00% | 3  | 6  | 13 | 0.13% | 16.70% | LQAAVD<br>GPSDKK<br>EE       | 3.31 | 1,486.74 |
| Control | 6018 | B-cell receptor-associated protein 31                | gi 59858303,gi 62460574,gi 74354925   | 27,884.40 | 100.00% | 3  | 6  | 13 | 0.13% | 16.70% | VNLQNN<br>PGAVEH<br>FHMK     | 3.99 | 1,850.90 |
| Control | 6018 | RecName : Full=Prohibitin-2                          | gi 109892820,gi 114051223,gi 87578149 | 33,340.80 | 100.00% | 14 | 18 | 65 | 0.63% | 56.90% | AKDFSLI<br>LDDVAI<br>TELSFSR | 4.77 | 2,240.18 |
| Control | 6018 | RecName : Full=Prohibitin-2                          | gi 109892820,gi 114051223,gi 87578149 | 33,340.80 | 100.00% | 14 | 18 | 65 | 0.63% | 56.90% | AQVSLLI<br>R                 | 2.6  | 899.5673 |
| Control | 6018 | RecName : Full=Prohibitin-2                          | gi 109892820,gi 114051223,gi 87578149 | 33,340.80 | 100.00% | 14 | 18 | 65 | 0.63% | 56.90% | DLQMVN<br>ISLR               | 3.47 | 1,204.64 |
| Control | 6018 | RecName : Full=Prohibitin-2                          | gi 109892820,gi 114051223,gi 87578149 | 33,340.80 | 100.00% | 14 | 18 | 65 | 0.63% | 56.90% | ESVFTV<br>EGGHR              | 2.67 | 1,217.59 |

|         |      |                                       |                                                    |           |         |    |    |    |       |        |                                                  |          |
|---------|------|---------------------------------------|----------------------------------------------------|-----------|---------|----|----|----|-------|--------|--------------------------------------------------|----------|
| Control | 6018 | RecName<br>:<br>Full=Pro<br>hibitin-2 | gi 1098928<br>20,gi 11405<br>1223,gi 875<br>78149  | 33,340.80 | 100.00% | 14 | 18 | 65 | 0.63% | 56.90% | FNASQLI 3.87<br>TQR                              | 1,177.63 |
| Control | 6018 | RecName<br>:<br>Full=Pro<br>hibitin-2 | gi 1098928<br>20,gi 11405<br>1223,gi 875<br>78149  | 33,340.80 | 100.00% | 14 | 18 | 65 | 0.63% | 56.90% | IGGVQQ 4.49<br>DTILAEG<br>LHFR                   | 1,853.99 |
| Control | 6018 | RecName<br>:<br>Full=Pro<br>hibitin-2 | gi 1098928<br>20,gi 11405<br>1223,gi 875<br>78149  | 33,340.80 | 100.00% | 14 | 18 | 65 | 0.63% | 56.90% | IPWFQYP 3.69<br>IYDIR                            | 1,723.92 |
| Control | 6018 | RecName<br>:<br>Full=Pro<br>hibitin-2 | gi 1098928<br>20,gi 11405<br>1223,gi 875<br>78149  | 33,340.80 | 100.00% | 14 | 18 | 65 | 0.63% | 56.90% | IVQAEG 4.01<br>EAEAAR                            | 1,243.63 |
| Control | 6018 | RecName<br>:<br>Full=Pro<br>hibitin-2 | gi 1098928<br>20,gi 11405<br>1223,gi 875<br>78149  | 33,340.80 | 100.00% | 14 | 18 | 65 | 0.63% | 56.90% | IYLTAD 4.96<br>NLVLNL<br>QDESFT<br>R             | 2,225.15 |
| Control | 6018 | RecName<br>:<br>Full=Pro<br>hibitin-2 | gi 1098928<br>20,gi 11405<br>1223,gi 875<br>78149  | 33,340.80 | 100.00% | 14 | 18 | 65 | 0.63% | 56.90% | LGLDYE 3.07<br>ER                                | 994.4841 |
| Control | 6018 | RecName<br>:<br>Full=Pro<br>hibitin-2 | gi 1098928<br>20,gi 11405<br>1223,gi 875<br>78149  | 33,340.80 | 100.00% | 14 | 18 | 65 | 0.63% | 56.90% | LLLGAG 5.37<br>AVAYGI<br>R                       | 1,273.76 |
| Control | 6018 | RecName<br>:<br>Full=Pro<br>hibitin-2 | gi 1098928<br>20,gi 11405<br>1223,gi 875<br>78149  | 33,340.80 | 100.00% | 14 | 18 | 65 | 0.63% | 56.90% | QKIVQA 4.05<br>EGEAEA<br>AR                      | 1,499.78 |
| Control | 6018 | RecName<br>:<br>Full=Pro<br>hibitin-2 | gi 1098928<br>20,gi 11405<br>1223,gi 875<br>78149  | 33,340.80 | 100.00% | 14 | 18 | 65 | 0.63% | 56.90% | VLPSIVN 2.56<br>EVLK                             | 1,210.74 |
| Control | 6018 | RecName<br>:<br>Full=Pro<br>hibitin-2 | gi 1098928<br>20,gi 11405<br>1223,gi 875<br>78149  | 33,340.80 | 100.00% | 14 | 18 | 65 | 0.63% | 56.90% | VLSRPN 3.52<br>AMELPS<br>MYQR                    | 1,907.95 |
| Control | 6018 | TAP1<br>protein                       | gi 1515570<br>07                                   | 81,933.30 | 100.00% | 4  | 6  | 10 | 0.10% | 8.13%  | GVVGAA 3.3<br>LGFR                               | 946.5469 |
| Control | 6018 | TAP1<br>protein                       | gi 1515570<br>07                                   | 81,933.30 | 100.00% | 4  | 6  | 10 | 0.10% | 8.13%  | SSQVAIE 3.77<br>VLSAMP<br>TVR                    | 1,703.90 |
| Control | 6018 | TAP1<br>protein                       | gi 1515570<br>07                                   | 81,933.30 | 100.00% | 4  | 6  | 10 | 0.10% | 8.13%  | STVAAL 4.64<br>LQNLQY<br>PTEGQV<br>LLDGEP<br>LPK | 2,894.55 |
| Control | 6018 | TAP1<br>protein                       | gi 1515570<br>07                                   | 81,933.30 | 100.00% | 4  | 6  | 10 | 0.10% | 8.13%  | SVLFITQ 2.6<br>R                                 | 963.5622 |
| Control | 6018 | MOSPD2<br>protein                     | gi 1515560<br>11,gi 15536<br>9632,gi 156<br>120441 | 56,360.50 | 99.80%  | 2  | 2  | 2  | 0.02% | 6.50%  | ALIVLTN 2.69<br>VTK                              | 1,071.68 |
| Control | 6018 | MOSPD2<br>protein                     | gi 1515560<br>11,gi 15536<br>9632,gi 156<br>120441 | 56,360.50 | 99.80%  | 2  | 2  | 2  | 0.02% | 6.50%  | GPLLHIS 3.12<br>PAEELYF<br>GSTDG<br>EK           | 2,347.15 |



|         |      |                                                                                                                                                                                                                                                                                                                                                           |           |         |   |    |    |       |        |                                  |          |
|---------|------|-----------------------------------------------------------------------------------------------------------------------------------------------------------------------------------------------------------------------------------------------------------------------------------------------------------------------------------------------------------|-----------|---------|---|----|----|-------|--------|----------------------------------|----------|
| Control | 6018 | RecName gi 113948,g<br>: i 162779,g <br>Full=Ann 27807289,g<br>exin A2; i 59858385,<br>AltName: gi 7358698<br>Full=Ann 2<br>exin-2;<br>AltName:<br>Full=Ann<br>exin II;<br>AltName:<br>Full=Lip<br>ocortin<br>II;<br>AltName:<br>Full=Cal<br>pactin I<br>heavy<br>chain;<br>AltName:<br>Full=Chr<br>omobindi<br>n-8;<br>AltName:<br>Full=p36;<br>AltName: | 38,523.90 | 100.00% | 9 | 11 | 13 | 0.13% | 35.40% | AEDGSVI 3.91<br>DYELID<br>QDAR   | 1,908.88 |
| Control | 6018 | RecName gi 113948,g<br>: i 162779,g <br>Full=Ann 27807289,g<br>exin A2; i 59858385,<br>AltName: gi 7358698<br>Full=Ann 2<br>exin-2;<br>AltName:<br>Full=Ann<br>exin II;<br>AltName:<br>Full=Lip<br>ocortin<br>II;<br>AltName:<br>Full=Cal<br>pactin I<br>heavy<br>chain;<br>AltName:<br>Full=Chr<br>omobindi<br>n-8;<br>AltName:<br>Full=p36;<br>AltName: | 38,523.90 | 100.00% | 9 | 11 | 13 | 0.13% | 35.40% | AYTNFD 4.61<br>AERDAL<br>NIETAIK | 2,155.07 |

|         |      |                                                                                                                                                                                                                                                                                                                                                           |           |         |   |    |    |       |        |                                 |          |
|---------|------|-----------------------------------------------------------------------------------------------------------------------------------------------------------------------------------------------------------------------------------------------------------------------------------------------------------------------------------------------------------|-----------|---------|---|----|----|-------|--------|---------------------------------|----------|
| Control | 6018 | RecName gi 113948,g<br>: i 162779,g <br>Full=Ann 27807289,g<br>exin A2; i 59858385,<br>AltName: gi 7358698<br>Full=Ann 2<br>exin-2;<br>AltName:<br>Full=Ann<br>exin II;<br>AltName:<br>Full=Lip<br>ocortin<br>II;<br>AltName:<br>Full=Cal<br>pactin I<br>heavy<br>chain;<br>AltName:<br>Full=Chr<br>omobindi<br>n-8;<br>AltName:<br>Full=p36;<br>AltName: | 38,523.90 | 100.00% | 9 | 11 | 13 | 0.13% | 35.40% | GVDEVT 4.32<br>IVNLTN<br>R      | 1,542.85 |
| Control | 6018 | RecName gi 113948,g<br>: i 162779,g <br>Full=Ann 27807289,g<br>exin A2; i 59858385,<br>AltName: gi 7358698<br>Full=Ann 2<br>exin-2;<br>AltName:<br>Full=Ann<br>exin II;<br>AltName:<br>Full=Lip<br>ocortin<br>II;<br>AltName:<br>Full=Cal<br>pactin I<br>heavy<br>chain;<br>AltName:<br>Full=Chr<br>omobindi<br>n-8;<br>AltName:<br>Full=p36;<br>AltName: | 38,523.90 | 100.00% | 9 | 11 | 13 | 0.13% | 35.40% | LSLEGD 4.56<br>HSTPPSA<br>YGSVK | 1,844.90 |

|         |      |                                                                                                                                                                                                                                                                                                                                                           |           |         |   |    |    |       |        |                            |      |          |
|---------|------|-----------------------------------------------------------------------------------------------------------------------------------------------------------------------------------------------------------------------------------------------------------------------------------------------------------------------------------------------------------|-----------|---------|---|----|----|-------|--------|----------------------------|------|----------|
| Control | 6018 | RecName gi 113948,g<br>: i 162779,g <br>Full=Ann 27807289,g<br>exin A2; i 59858385,<br>AltName: gi 7358698<br>Full=Ann 2<br>exin-2;<br>AltName:<br>Full=Ann<br>exin II;<br>AltName:<br>Full=Lip<br>ocortin<br>II;<br>AltName:<br>Full=Cal<br>pactin I<br>heavy<br>chain;<br>AltName:<br>Full=Chr<br>omobindi<br>n-8;<br>AltName:<br>Full=p36;<br>AltName: | 38,523.90 | 100.00% | 9 | 11 | 13 | 0.13% | 35.40% | RAEDGS<br>VIDYELI<br>DQDAR | 5.54 | 2,064.98 |
| Control | 6018 | RecName gi 113948,g<br>: i 162779,g <br>Full=Ann 27807289,g<br>exin A2; i 59858385,<br>AltName: gi 7358698<br>Full=Ann 2<br>exin-2;<br>AltName:<br>Full=Ann<br>exin II;<br>AltName:<br>Full=Lip<br>ocortin<br>II;<br>AltName:<br>Full=Cal<br>pactin I<br>heavy<br>chain;<br>AltName:<br>Full=Chr<br>omobindi<br>n-8;<br>AltName:<br>Full=p36;<br>AltName: | 38,523.90 | 100.00% | 9 | 11 | 13 | 0.13% | 35.40% | SALSGH<br>LETVILG<br>LLK   | 4.25 | 1,650.98 |

|         |      |                                                                                                                                                                                                                                                                                                                                                           |           |         |   |    |    |       |        |                                |          |
|---------|------|-----------------------------------------------------------------------------------------------------------------------------------------------------------------------------------------------------------------------------------------------------------------------------------------------------------------------------------------------------------|-----------|---------|---|----|----|-------|--------|--------------------------------|----------|
| Control | 6018 | RecName gi 113948,g<br>: i 162779,g <br>Full=Ann 27807289,g<br>exin A2; i 59858385,<br>AltName: gi 7358698<br>Full=Ann 2<br>exin-2;<br>AltName:<br>Full=Ann<br>exin II;<br>AltName:<br>Full=Lip<br>ocortin<br>II;<br>AltName:<br>Full=Cal<br>pactin I<br>heavy<br>chain;<br>AltName:<br>Full=Chr<br>omobindi<br>n-8;<br>AltName:<br>Full=p36;<br>AltName: | 38,523.90 | 100.00% | 9 | 11 | 13 | 0.13% | 35.40% | SLYYYYIQ 3.33<br>QDTKGD<br>YQK | 2,012.96 |
| Control | 6018 | RecName gi 113948,g<br>: i 162779,g <br>Full=Ann 27807289,g<br>exin A2; i 59858385,<br>AltName: gi 7358698<br>Full=Ann 2<br>exin-2;<br>AltName:<br>Full=Ann<br>exin II;<br>AltName:<br>Full=Lip<br>ocortin<br>II;<br>AltName:<br>Full=Cal<br>pactin I<br>heavy<br>chain;<br>AltName:<br>Full=Chr<br>omobindi<br>n-8;<br>AltName:<br>Full=p36;<br>AltName: | 38,523.90 | 100.00% | 9 | 11 | 13 | 0.13% | 35.40% | TDLEKDI 5.28<br>VSDTSG<br>DFRK | 1,925.95 |

|         |      |                                                                                                                                                                                                                                                                                                                                                           |           |         |   |    |    |       |        |                                   |          |
|---------|------|-----------------------------------------------------------------------------------------------------------------------------------------------------------------------------------------------------------------------------------------------------------------------------------------------------------------------------------------------------------|-----------|---------|---|----|----|-------|--------|-----------------------------------|----------|
| Control | 6018 | RecName gi 113948,g<br>: i 162779,gj<br>Full=Ann 27807289,g<br>exin A2; i 59858385,<br>AltName: gi 7358698<br>Full=Ann 2<br>exin-2;<br>AltName:<br>Full=Ann<br>exin II;<br>AltName:<br>Full=Lip<br>ocortin<br>II;<br>AltName:<br>Full=Cal<br>pactin I<br>heavy<br>chain;<br>AltName:<br>Full=Chr<br>omobindi<br>n-8;<br>AltName:<br>Full=p36;<br>AltName: | 38,523.90 | 100.00% | 9 | 11 | 13 | 0.13% | 35.40% | TKGVDE 3.65<br>VTIVNIL<br>TNR     | 1,771.99 |
| Control | 6018 | RecName gi 1102830<br>: 11,gj 27806<br>Full=Try 353,gj 7435<br>ptophanyl-4933,gj 825<br>tRNA<br>synthetas<br>e,<br>cytoplas<br>mic;<br>AltName:<br>Full=Try<br>ptophan--<br>tRNA<br>ligase;<br>Short=Tr<br>pRS                                                                                                                                            | 53,712.80 | 100.00% | 4 | 6  | 7  | 0.07% | 13.90% | ELIEVLQ 3.13<br>PLIAEHQ<br>AR     | 1,859.04 |
| Control | 6018 | RecName gi 1102830<br>: 11,gj 27806<br>Full=Try 353,gj 7435<br>ptophanyl-4933,gj 825<br>tRNA<br>synthetas<br>e,<br>cytoplas<br>mic;<br>AltName:<br>Full=Try<br>ptophan--<br>tRNA<br>ligase;<br>Short=Tr<br>pRS                                                                                                                                            | 53,712.80 | 100.00% | 4 | 6  | 7  | 0.07% | 13.90% | ISFPAIQ 3.8<br>AAPSFNS<br>SFPQIFR | 2,325.20 |

|         |      |                                                                                                                                                                   |                                |         |   |   |   |       |        |                          |      |          |
|---------|------|-------------------------------------------------------------------------------------------------------------------------------------------------------------------|--------------------------------|---------|---|---|---|-------|--------|--------------------------|------|----------|
| Control | 6018 | RecName gi 1102830 : 11.gi 27806 Full=Try 353.gi 7435 ptophanyl:4933.gi 825 tRNA synthetas e, cytoplas mic; AltName: Full=Try ptophan-- tRNA ligase; Short=Tr pRS | 53,712.80                      | 100.00% | 4 | 6 | 7 | 0.07% | 13.90% | MSASDP NSSIFLT DTAK      | 3.69 | 1,800.83 |
| Control | 6018 | RecName gi 1102830 : 11.gi 27806 Full=Try 353.gi 7435 ptophanyl:4933.gi 825 tRNA synthetas e, cytoplas mic; AltName: Full=Try ptophan-- tRNA ligase; Short=Tr pRS | 53,712.80                      | 100.00% | 4 | 6 | 7 | 0.07% | 13.90% | NAAKDE IDSAVK            | 3.24 | 1,260.64 |
| Control | 6018 | PREDIC TED: 65 similar to Transme mbrane protein 16F                                                                                                              | gi 1198922 106,290.10          | 99.80%  | 2 | 2 | 2 | 0.02% | 4.72%  | LLQVDE SIKPEQ EFFTAPF EK | 3.13 | 2,608.35 |
| Control | 6018 | PREDIC TED: 65 similar to Transme mbrane protein 16F                                                                                                              | gi 1198922 106,290.10          | 99.80%  | 2 | 2 | 2 | 0.02% | 4.72%  | TPEFEEF NGKPDS LYFNDG QR | 4.43 | 2,490.12 |
| Control | 6018 | VAPB protein                                                                                                                                                      | gi 1260107 27,140.50           | 100.00% | 5 | 6 | 8 | 0.08% | 16.90% | ALSSSLD DTEVK            | 3.15 | 1,264.63 |
| Control | 6018 | VAPB protein                                                                                                                                                      | 84.gi 12927 0105.gi 160 210887 | 100.00% | 5 | 6 | 8 | 0.08% | 16.90% | ALSSSLD DTEVKK           | 4.33 | 1,392.72 |
| Control | 6018 | VAPB protein                                                                                                                                                      | gi 1260107 27,140.50           | 100.00% | 5 | 6 | 8 | 0.08% | 16.90% | FRGPFT DVVTTN LK         | 4.88 | 1,594.86 |
| Control | 6018 | VAPB protein                                                                                                                                                      | 84.gi 12927 0105.gi 160 210887 | 100.00% | 5 | 6 | 8 | 0.08% | 16.90% | GPFTDV VTTNLK            | 4.12 | 1,291.69 |
| Control | 6018 | VAPB protein                                                                                                                                                      | gi 1260107 27,140.50           | 100.00% | 5 | 6 | 8 | 0.08% | 16.90% | VEQVLS LEPQHE LK         | 4.73 | 1,648.89 |
| Control | 6018 | VAPB protein                                                                                                                                                      | 84.gi 12927 0105.gi 160 210887 | 100.00% | 5 | 6 | 8 | 0.08% | 16.90% |                          |      |          |

|         |      |                                                                                                         |                                       |           |         |   |   |   |       |        |                                                   |      |          |
|---------|------|---------------------------------------------------------------------------------------------------------|---------------------------------------|-----------|---------|---|---|---|-------|--------|---------------------------------------------------|------|----------|
| Control | 6018 | moesin                                                                                                  | gi 114050715,gi 118583148,gi 87578169 | 67,959.00 | 100.00% | 3 | 3 | 4 | 0.04% | 10.10% | APDFVF<br>YAPR                                    | 3.65 | 1,182.59 |
| Control | 6018 | moesin                                                                                                  | gi 114050715,gi 118583148,gi 87578169 | 67,959.00 | 100.00% | 3 | 3 | 4 | 0.04% | 10.10% | FYPEDV<br>SEELIQD<br>ITQR                         | 2.56 | 2,082.00 |
| Control | 6018 | moesin                                                                                                  | gi 114050715,gi 118583148,gi 87578169 | 67,959.00 | 100.00% | 3 | 3 | 4 | 0.04% | 10.10% | TAMSTP<br>HVAEPA<br>ENEQDE<br>QDENG<br>EASAE<br>R | 5.73 | 3,342.43 |
| Control | 6018 | PDZ and LIM domain 1                                                                                    | gi 148877479                          | 35,802.30 | 99.80%  | 2 | 2 | 3 | 0.03% | 13.40% | SAVPFT<br>ASPASS<br>APR                           | 4.29 | 1,532.77 |
| Control | 6018 | PDZ and LIM domain 1                                                                                    | gi 148877479                          | 35,802.30 | 99.80%  | 2 | 2 | 3 | 0.03% | 13.40% | VITNQY<br>NNPAGL<br>YSSENI<br>SFNNAL<br>ESK       | 3.1  | 3,074.47 |
| Control | 6018 | PREDICTED: similar to Keratin, type I cytoskeletal 24 (Cytokeratin-24) (Keratin-24) (Type I keratin-24) | gi 194676109                          | 55,111.70 | 99.80%  | 2 | 3 | 4 | 0.04% | 5.33%  | KVLDDL<br>TMTR                                    | 3.23 | 1,207.64 |
| Control | 6018 | PREDICTED: similar to Keratin, type I cytoskeletal 24 (Cytokeratin-24) (Keratin-24) (Type I keratin-24) | gi 194676109                          | 55,111.70 | 99.80%  | 2 | 3 | 4 | 0.04% | 5.33%  | SDLEMQ<br>IESLTEE<br>LAYLK                        | 3.86 | 2,112.04 |
| Control | 6018 | H2A histone family, member Y                                                                            | gi 114052404,gi 87578157              | 39,516.80 | 99.80%  | 2 | 4 | 6 | 0.06% | 13.70% | AASADS<br>TTEGTP<br>ADGFTV<br>LSTK                | 4.73 | 2,127.01 |
| Control | 6018 | H2A histone family, member Y                                                                            | gi 114052404,gi 87578157              | 39,516.80 | 99.80%  | 2 | 4 | 6 | 0.06% | 13.70% | IGVGAP<br>VYMAA<br>VLEYLT<br>AEILELA<br>GNAAR     | 5.75 | 2,991.59 |
| Control | 6018 | PREDICTED: transmembrane protein 33 isoform 2                                                           | gi 119893815,gi 119922774             | 27,968.00 | 99.80%  | 2 | 2 | 2 | 0.02% | 8.10%  | ALLANA<br>LTSALR                                  | 4.11 | 1,213.73 |

|         |      |                                                                                                     |                                                                                    |           |         |   |   |    |       |        |                           |      |          |
|---------|------|-----------------------------------------------------------------------------------------------------|------------------------------------------------------------------------------------|-----------|---------|---|---|----|-------|--------|---------------------------|------|----------|
| Control | 6018 | PREDICTED: transmembrane protein 33 isoform 2                                                       | gi 119893815,gi 119922774                                                          | 27,968.00 | 99.80%  | 2 | 2 | 2  | 0.02% | 8.10%  | LPHFQLS<br>R              | 2.39 | 997.5578 |
| Control | 6018 | Chain A, Crystallization And Structure Determination Of Bovine Profilin At 2.0 Angstroms Resolution | gi 157833536,gi 157878211,gi 576369,gi 59858521,gi 6228870,gi 62751593,gi 73586531 | 15,039.50 | 100.00% | 5 | 5 | 10 | 0.10% | 45.00% | DSLLQD<br>GEFTMD<br>LR    | 3.62 | 1,655.76 |
| Control | 6018 | Chain A, Crystallization And Structure Determination Of Bovine Profilin At 2.0 Angstroms Resolution | gi 157833536,gi 157878211,gi 576369,gi 59858521,gi 6228870,gi 62751593,gi 73586531 | 15,039.50 | 100.00% | 5 | 5 | 10 | 0.10% | 45.00% | SSFFVNG<br>LTLGGQ<br>K    | 4.62 | 1,454.76 |
| Control | 6018 | Chain A, Crystallization And Structure Determination Of Bovine Profilin At 2.0 Angstroms Resolution | gi 157833536,gi 157878211,gi 576369,gi 59858521,gi 6228870,gi 62751593,gi 73586531 | 15,039.50 | 100.00% | 5 | 5 | 10 | 0.10% | 45.00% | STGGAP<br>TFNITVT<br>MTAK | 4.05 | 1,712.85 |
| Control | 6018 | Chain A, Crystallization And Structure Determination Of Bovine Profilin At 2.0 Angstroms Resolution | gi 157833536,gi 157878211,gi 576369,gi 59858521,gi 6228870,gi 62751593,gi 73586531 | 15,039.50 | 100.00% | 5 | 5 | 10 | 0.10% | 45.00% | TFVNITP<br>AEVGILV<br>GK  | 5.08 | 1,657.95 |



|         |      |                                                                                                     |                                                                                   |            |         |   |   |    |       |        |                                               |      |          |
|---------|------|-----------------------------------------------------------------------------------------------------|-----------------------------------------------------------------------------------|------------|---------|---|---|----|-------|--------|-----------------------------------------------|------|----------|
| Control | 6018 | Chain A, Crystallization And Structure Determination Of Bovine Profilin At 2.0 Angstroms Resolution | gi 157833536,gi 157878211,gi 576369,gi 59858521,gi 628870,gi 62751593,gi 73586531 | 15,039.50  | 100.00% | 5 | 5 | 10 | 0.10% | 45.00% | TFVNITP<br>AEVGILV<br>GKDR                    | 3.02 | 1,929.08 |
| Control | 6018 | PREDICTED: ATPase type 13A1 isoform 1                                                               | gi 76620985                                                                       | 132,577.20 | 99.80%  | 2 | 3 | 3  | 0.03% | 2.92%  | FLPVAFP<br>VGNAFS<br>FYQSNR                   | 4.59 | 2,161.09 |
| Control | 6018 | PREDICTED: ATPase type 13A1 isoform 1                                                               | gi 76620985                                                                       | 132,577.20 | 99.80%  | 2 | 3 | 3  | 0.03% | 2.92%  | SIDGISE<br>PLAQGS<br>PK                       | 3.79 | 1,585.81 |
| Control | 6018 | Cell adhesion molecule 1                                                                            | gi 83638798,gi 84370145                                                           | 45,751.20  | 99.90%  | 2 | 2 | 3  | 0.03% | 7.19%  | GADDAA<br>DADTAI<br>NAEGGQ<br>NNSEEK<br>K     | 3.62 | 2,604.17 |
| Control | 6018 | Cell adhesion molecule 1                                                                            | gi 83638798,gi 84370145                                                           | 45,751.20  | 99.90%  | 2 | 2 | 3  | 0.03% | 7.19%  | GADDAA<br>DADTAI<br>NAEGGQ<br>NNSEEK<br>KEYFI | 5.23 | 3,156.42 |
| Control | 6018 | Brain abundant membrane attached signal protein 1                                                   | gi 115304757,gi 1930063,gi 27807507,gi 6686271                                    | 22,992.60  | 100.00% | 2 | 2 | 3  | 0.03% | 12.80% | AQAPAA<br>PADEVK<br>PAETPA<br>ANSDQT<br>VAVK  | 3.37 | 2,747.38 |
| Control | 6018 | Brain abundant membrane attached signal protein 1                                                   | gi 115304757,gi 1930063,gi 27807507,gi 6686271                                    | 22,992.60  | 100.00% | 2 | 2 | 3  | 0.03% | 12.80% | AQAPAA<br>PADEVK<br>PAETPA<br>ANSDQT<br>VAVKE | 2.96 | 2,876.43 |
| Control | 6018 | Heme oxygenase (decycling) 1                                                                        | gi 158455152,gi 59858301,gi 62460520,gi 73919958                                  | 32,922.40  | 100.00% | 4 | 6 | 8  | 0.08% | 25.30% | ALNLPSS<br>GGLAF<br>FTFPNIA<br>SATK           | 5.42 | 2,453.27 |
| Control | 6018 | Heme oxygenase (decycling) 1                                                                        | gi 158455152,gi 59858301,gi 62460520,gi 73919958                                  | 32,922.40  | 100.00% | 4 | 6 | 8  | 0.08% | 25.30% | LVMASL<br>YHIYVA<br>LEEEIER                   | 3.98 | 2,294.17 |
| Control | 6018 | Heme oxygenase (decycling) 1                                                                        | gi 158455152,gi 59858301,gi 62460520,gi 73919958                                  | 32,922.40  | 100.00% | 4 | 6 | 8  | 0.08% | 25.30% | NKENPV<br>YTPLYFP<br>EELHR                    | 6.72 | 2,246.12 |

|         |      |                                                                          |                                                  |            |         |   |   |   |       |        |                                                |      |          |
|---------|------|--------------------------------------------------------------------------|--------------------------------------------------|------------|---------|---|---|---|-------|--------|------------------------------------------------|------|----------|
| Control | 6018 | Heme oxygenase (decyclin g) 1                                            | gi 158455152,gi 59858301,gi 62460520,gi 73919958 | 32,922.40  | 100.00% | 4 | 6 | 8 | 0.08% | 25.30% | YLGDLS<br>GGQVLK                               | 2.87 | 1,249.68 |
| Control | 6018 | HADHA protein                                                            | gi 74268185                                      | 83,232.60  | 100.00% | 3 | 3 | 3 | 0.03% | 6.68%  | DAMFSN<br>LIGQLDY<br>R                         | 3.19 | 1,658.78 |
| Control | 6018 | HADHA protein                                                            | gi 74268185                                      | 83,232.60  | 100.00% | 3 | 3 | 3 | 0.03% | 6.68%  | MPSQPD<br>VSSDEDI<br>QYR                       | 3.07 | 1,882.81 |
| Control | 6018 | HADHA protein                                                            | gi 74268185                                      | 83,232.60  | 100.00% | 3 | 3 | 3 | 0.03% | 6.68%  | TVLGSP<br>EVLLGIL<br>PGAGAT<br>QR              | 3.81 | 2,049.17 |
| Control | 6018 | RecName : Full=Thrombospondin-1; Flags: Precursor                        | gi 12644428,gi 2244707,gi 41386685               | 129,515.10 | 100.00% | 4 | 4 | 4 | 0.04% | 4.70%  | FVFGTTP<br>EDILR                               | 3.16 | 1,394.73 |
| Control | 6018 | RecName : Full=Thrombospondin-1; Flags: Precursor                        | gi 12644428,gi 2244707,gi 41386685               | 129,515.10 | 100.00% | 4 | 4 | 4 | 0.04% | 4.70%  | GGVNDN<br>FQGVLQ<br>NVR                        | 4.08 | 1,616.81 |
| Control | 6018 | RecName : Full=Thrombospondin-1; Flags: Precursor                        | gi 12644428,gi 2244707,gi 41386685               | 129,515.10 | 100.00% | 4 | 4 | 4 | 0.04% | 4.70%  | IEDANLI<br>PPVDPK<br>K                         | 2.91 | 1,548.86 |
| Control | 6018 | RecName : Full=Thrombospondin-1; Flags: Precursor                        | gi 12644428,gi 2244707,gi 41386685               | 129,515.10 | 100.00% | 4 | 4 | 4 | 0.04% | 4.70%  | KVTEEN<br>KELANE<br>LR                         | 3.01 | 1,672.89 |
| Control | 6018 | RecName : Full=Thioredoxin domain-containing protein 4; Flags: Precursor | gi 108861917,gi 74354589,gi 78042524             | 46,819.40  | 100.00% | 4 | 6 | 6 | 0.06% | 23.90% | EDTESLE<br>IFQNEVA<br>R                        | 3.39 | 1,779.84 |
| Control | 6018 | RecName : Full=Thioredoxin domain-containing protein 4; Flags: Precursor | gi 108861917,gi 74354589,gi 78042524             | 46,819.40  | 100.00% | 4 | 6 | 6 | 0.06% | 23.90% | FSQMLH<br>PIFEEAS<br>NVIKEE<br>YPNANQ<br>VVFAR | 5.24 | 3,523.73 |

|         |      |                                                                                                                                                                                         |                                                                                                                                        |           |         |   |   |   |       |        |                                                             |          |
|---------|------|-----------------------------------------------------------------------------------------------------------------------------------------------------------------------------------------|----------------------------------------------------------------------------------------------------------------------------------------|-----------|---------|---|---|---|-------|--------|-------------------------------------------------------------|----------|
| Control | 6018 | RecName<br>:<br>Full=Thi<br>oredoxin<br>domain-<br>containin<br>g protein<br>4; Flags:<br>Precursor                                                                                     | gi 1088619<br>17,gi 74354<br>589,gi 7804<br>2524                                                                                       | 46,819.40 | 100.00% | 4 | 6 | 6 | 0.06% | 23.90% | LHREFH 2.28<br>HGPDPPT<br>DTAPGE<br>EVQDVA<br>SSPPES<br>FQK | 3,728.72 |
| Control | 6018 | RecName<br>:<br>Full=Thi<br>oredoxin<br>domain-<br>containin<br>g protein<br>4; Flags:<br>Precursor                                                                                     | gi 1088619<br>17,gi 74354<br>589,gi 7804<br>2524                                                                                       | 46,819.40 | 100.00% | 4 | 6 | 6 | 0.06% | 23.90% | SDPIQEL 4.58<br>HDLAEIT<br>TPDR                             | 2,050.01 |
| Control | 6018 | RecName<br>:<br>Full=Mit<br>ochondri<br>al 2-<br>oxoglutar<br>ate/malat<br>e carrier<br>protein;<br>Short=O<br>GCP;<br>AltName:<br>Full=Solu<br>te carrier<br>family 25<br>member<br>11 | gi 126664,g<br>i 14623167<br>6,gi 148744<br>036,gi 1488<br>78065,gi 16<br>3432,gi 163<br>434,gi 2780<br>7211,gi 32,<br>gi 5985797<br>7 | 33,881.70 | 100.00% | 4 | 5 | 6 | 0.06% | 22.50% | AVIGMT 3.64<br>AGATGA<br>FVGTPA<br>EVALIR                   | 2,289.23 |
| Control | 6018 | RecName<br>:<br>Full=Mit<br>ochondri<br>al 2-<br>oxoglutar<br>ate/malat<br>e carrier<br>protein;<br>Short=O<br>GCP;<br>AltName:<br>Full=Solu<br>te carrier<br>family 25<br>member<br>11 | gi 126664,g<br>i 14623167<br>6,gi 148744<br>036,gi 1488<br>78065,gi 16<br>3432,gi 163<br>434,gi 2780<br>7211,gi 32,<br>gi 5985797<br>7 | 33,881.70 | 100.00% | 4 | 5 | 6 | 0.06% | 22.50% | AVVVNA 3.18<br>AQLASY<br>SQSK                               | 1,635.87 |

|         |      |                                                                                                                                                                                         |                                                                                                                                        |           |         |   |    |    |       |        |                                      |      |          |
|---------|------|-----------------------------------------------------------------------------------------------------------------------------------------------------------------------------------------|----------------------------------------------------------------------------------------------------------------------------------------|-----------|---------|---|----|----|-------|--------|--------------------------------------|------|----------|
| Control | 6018 | RecName<br>:<br>Full=Mit<br>ochondri<br>al 2-<br>oxoglutar<br>ate/malat<br>e carrier<br>protein;<br>Short=O<br>GCP;<br>AltName:<br>Full=Solu<br>te carrier<br>family 25<br>member<br>11 | gi 126664.g<br>i 14623167<br>6,gi 148744<br>036,gi 1488<br>78065,gi 16<br>3432,gi 163<br>434,gi 2780<br>7211,gi 32,<br>gi 5985797<br>7 | 33,881.70 | 100.00% | 4 | 5  | 6  | 0.06% | 22.50% | FLFGGL<br>AGMGAT<br>VVFVQPL<br>DLVK  | 4.16 | 2,296.24 |
| Control | 6018 | RecName<br>:<br>Full=Mit<br>ochondri<br>al 2-<br>oxoglutar<br>ate/malat<br>e carrier<br>protein;<br>Short=O<br>GCP;<br>AltName:<br>Full=Solu<br>te carrier<br>family 25<br>member<br>11 | gi 126664.g<br>i 14623167<br>6,gi 148744<br>036,gi 1488<br>78065,gi 16<br>3432,gi 163<br>434,gi 2780<br>7211,gi 32,<br>gi 5985797<br>7 | 33,881.70 | 100.00% | 4 | 5  | 6  | 0.06% | 22.50% | NVFNAL<br>FR                         | 2.34 | 980.5311 |
| Control | 6018 | ER lipid<br>raft<br>associate<br>d 2                                                                                                                                                    | gi 1140510<br>93,gi 12213<br>4590,gi 920<br>97476                                                                                      | 37,713.20 | 100.00% | 3 | 3  | 4  | 0.04% | 14.20% | GGALLT<br>STSGPGF<br>HLMLPFI<br>TSYK | 2.83 | 2,511.30 |
| Control | 6018 | ER lipid<br>raft<br>associate<br>d 2                                                                                                                                                    | gi 1140510<br>93,gi 12213<br>4590,gi 920<br>97476                                                                                      | 37,713.20 | 100.00% | 3 | 3  | 4  | 0.04% | 14.20% | SVQTTL<br>QTDEVK                     | 2.82 | 1,348.70 |
| Control | 6018 | ER lipid<br>raft<br>associate<br>d 2                                                                                                                                                    | gi 1140510<br>93,gi 12213<br>4590,gi 920<br>97476                                                                                      | 37,713.20 | 100.00% | 3 | 3  | 4  | 0.04% | 14.20% | VAQVAE<br>ITFGQK                     | 2.93 | 1,290.71 |
| Control | 6018 | GLI<br>pathogen<br>esis-<br>related 2                                                                                                                                                   | gi 1113070<br>81,gi 11549<br>7826                                                                                                      | 17,191.20 | 100.00% | 2 | 2  | 2  | 0.02% | 16.90% | ASASDG<br>SSFVVA<br>R                | 2.59 | 1,253.61 |
| Control | 6018 | GLI<br>pathogen<br>esis-<br>related 2                                                                                                                                                   | gi 1113070<br>81,gi 11549<br>7826                                                                                                      | 17,191.20 | 100.00% | 2 | 2  | 2  | 0.02% | 16.90% | EAQQYS<br>EALAST<br>R                | 3.42 | 1,453.69 |
| Control | 6018 | ATAD3A<br>protein                                                                                                                                                                       | gi 1572788<br>89,gi 15742<br>8048,gi 162<br>416153                                                                                     | 66,090.40 | 100.00% | 8 | 10 | 13 | 0.13% | 17.70% | ATLNAF<br>LHR                        | 2.84 | 1,042.58 |
| Control | 6018 | ATAD3A<br>protein                                                                                                                                                                       | gi 1572788<br>89,gi 15742<br>8048,gi 162<br>416153                                                                                     | 66,090.40 | 100.00% | 8 | 10 | 13 | 0.13% | 17.70% | GLLLFV<br>DEADAF<br>LR               | 3.26 | 1,578.85 |
| Control | 6018 | ATAD3A<br>protein                                                                                                                                                                       | gi 1572788<br>89,gi 15742<br>8048,gi 162<br>416153                                                                                     | 66,090.40 | 100.00% | 8 | 10 | 13 | 0.13% | 17.70% | ITVLEAL<br>R                         | 2.67 | 914.567  |

|         |      |                                           |                                                 |           |         |   |    |    |       |        |                                    |      |          |
|---------|------|-------------------------------------------|-------------------------------------------------|-----------|---------|---|----|----|-------|--------|------------------------------------|------|----------|
| Control | 6018 | ATAD3A protein                            | gi 157278889,gi 157428048,gi 162416153          | 66,090.40 | 100.00% | 8 | 10 | 13 | 0.13% | 17.70% | LKEYEA<br>AVEQLK<br>GDQIR          | 4.21 | 1,990.06 |
| Control | 6018 | ATAD3A protein                            | gi 157278889,gi 157428048,gi 162416153          | 66,090.40 | 100.00% | 8 | 10 | 13 | 0.13% | 17.70% | NVLMYG<br>PPGTGK                   | 3.35 | 1,249.62 |
| Control | 6018 | ATAD3A protein                            | gi 157278889,gi 157428048,gi 162416153          | 66,090.40 | 100.00% | 8 | 10 | 13 | 0.13% | 17.70% | QQQLLN<br>EENLR                    | 2.64 | 1,384.72 |
| Control | 6018 | ATAD3A protein                            | gi 157278889,gi 157428048,gi 162416153          | 66,090.40 | 100.00% | 8 | 10 | 13 | 0.13% | 17.70% | RLLSKP<br>QDALEG<br>VVLSPSL<br>EAR | 3.55 | 2,378.34 |
| Control | 6018 | ATAD3A protein                            | gi 157278889,gi 157428048,gi 162416153          | 66,090.40 | 100.00% | 8 | 10 | 13 | 0.13% | 17.70% | TAGTLF<br>GEGFR                    | 3.68 | 1,155.58 |
| Control | 6018 | glucose-regulated protein GRP94 precursor | gi 16041057,gi 27807263,gi 33301108,gi 75775556 | 92,411.40 | 100.00% | 9 | 10 | 13 | 0.13% | 12.90% | DISTNYY<br>ASQK                    | 3.06 | 1,289.60 |
| Control | 6018 | glucose-regulated protein GRP94 precursor | gi 16041057,gi 27807263,gi 33301108,gi 75775556 | 92,411.40 | 100.00% | 9 | 10 | 13 | 0.13% | 12.90% | EEASDY<br>LELDTIK                  | 3.69 | 1,525.73 |
| Control | 6018 | glucose-regulated protein GRP94 precursor | gi 16041057,gi 27807263,gi 33301108,gi 75775556 | 92,411.40 | 100.00% | 9 | 10 | 13 | 0.13% | 12.90% | ELISNAS<br>DALDK                   | 3.35 | 1,275.64 |
| Control | 6018 | glucose-regulated protein GRP94 precursor | gi 16041057,gi 27807263,gi 33301108,gi 75775556 | 92,411.40 | 100.00% | 9 | 10 | 13 | 0.13% | 12.90% | ELISNAS<br>DALDKI<br>R             | 3.7  | 1,544.83 |
| Control | 6018 | glucose-regulated protein GRP94 precursor | gi 16041057,gi 27807263,gi 33301108,gi 75775556 | 92,411.40 | 100.00% | 9 | 10 | 13 | 0.13% | 12.90% | FQSSH<br>PSDMTS<br>LDQYVE<br>R     | 5.34 | 2,280.00 |
| Control | 6018 | glucose-regulated protein GRP94 precursor | gi 16041057,gi 27807263,gi 33301108,gi 75775556 | 92,411.40 | 100.00% | 9 | 10 | 13 | 0.13% | 12.90% | GVVDS<br>DLPLNV<br>SR              | 4.71 | 1,485.75 |
| Control | 6018 | glucose-regulated protein GRP94 precursor | gi 16041057,gi 27807263,gi 33301108,gi 75775556 | 92,411.40 | 100.00% | 9 | 10 | 13 | 0.13% | 12.90% | LIINSLY<br>K                       | 2.32 | 963.5874 |
| Control | 6018 | glucose-regulated protein GRP94 precursor | gi 16041057,gi 27807263,gi 33301108,gi 75775556 | 92,411.40 | 100.00% | 9 | 10 | 13 | 0.13% | 12.90% | NLLHVT<br>DTGVG<br>MTR             | 4.41 | 1,529.77 |

|         |      |                                           |                                                 |            |         |   |    |    |       |        |                      |      |          |
|---------|------|-------------------------------------------|-------------------------------------------------|------------|---------|---|----|----|-------|--------|----------------------|------|----------|
| Control | 6018 | glucose-regulated protein GRP94 precursor | gi 16041057,gi 27807263,gi 33301108,gi 75775556 | 92,411.40  | 100.00% | 9 | 10 | 13 | 0.13% | 12.90% | SILFVPT SAPR         | 3.08 | 1,187.68 |
| Control | 6018 | PREDIC TED: similar to catenin, delta 1   | gi 194673532                                    | 106,846.20 | 100.00% | 9 | 9  | 10 | 0.10% | 11.20% | ALSAIAD LLTNEHER     | 2.76 | 1,652.86 |
| Control | 6018 | PREDIC TED: similar to catenin, delta 1   | gi 194673532                                    | 106,846.20 | 100.00% | 9 | 9  | 10 | 0.10% | 11.20% | APSRQD VYGPQPQVR     | 4.16 | 1,697.87 |
| Control | 6018 | PREDIC TED: similar to catenin, delta 1   | gi 194673532                                    | 106,846.20 | 100.00% | 9 | 9  | 10 | 0.10% | 11.20% | FHPEPY GLEDDQR       | 2.93 | 1,602.72 |
| Control | 6018 | PREDIC TED: similar to catenin, delta 1   | gi 194673532                                    | 106,846.20 | 100.00% | 9 | 9  | 10 | 0.10% | 11.20% | FVGDA DLER           | 2.56 | 1,021.50 |
| Control | 6018 | PREDIC TED: similar to catenin, delta 1   | gi 194673532                                    | 106,846.20 | 100.00% | 9 | 9  | 10 | 0.10% | 11.20% | KPTEDP TNDTVDFPKR    | 4.5  | 1,859.91 |
| Control | 6018 | PREDIC TED: similar to catenin, delta 1   | gi 194673532                                    | 106,846.20 | 100.00% | 9 | 9  | 10 | 0.10% | 11.20% | NFHYP DGYSR          | 2.8  | 1,352.60 |
| Control | 6018 | PREDIC TED: similar to catenin, delta 1   | gi 194673532                                    | 106,846.20 | 100.00% | 9 | 9  | 10 | 0.10% | 11.20% | QDVYGP QPQVR         | 2.62 | 1,286.65 |
| Control | 6018 | PREDIC TED: similar to catenin, delta 1   | gi 194673532                                    | 106,846.20 | 100.00% | 9 | 9  | 10 | 0.10% | 11.20% | SLDNNY STLNER        | 3.07 | 1,425.66 |
| Control | 6018 | PREDIC TED: similar to catenin, delta 1   | gi 194673532                                    | 106,846.20 | 100.00% | 9 | 9  | 10 | 0.10% | 11.20% | VSPQDA SPLLANGTLTR   | 2.96 | 1,739.93 |
| Control | 6018 | FK506 binding protein 11, 19 kDa          | gi 114053349,gi 122138212,gi 82571590           | 22,457.80  | 100.00% | 5 | 6  | 14 | 0.14% | 15.30% | DPLVIEL GQK          | 3.35 | 1,111.64 |
| Control | 6018 | FK506 binding protein 11, 19 kDa          | gi 114053349,gi 122138212,gi 82571590           | 22,457.80  | 100.00% | 5 | 6  | 14 | 0.14% | 15.30% | IFDTSLT RDPLVIE LGQK | 5.17 | 2,045.13 |
| Control | 6018 | FK506 binding protein 11, 19 kDa          | gi 114053349,gi 122138212,gi 82571590           | 22,457.80  | 100.00% | 5 | 6  | 14 | 0.14% | 15.30% | RVIIPSH LAYGK        | 4.84 | 1,353.80 |

|         |      |                                              |                                        |            |         |   |   |    |       |        |                                     |      |          |
|---------|------|----------------------------------------------|----------------------------------------|------------|---------|---|---|----|-------|--------|-------------------------------------|------|----------|
| Control | 6018 | FK506 binding protein 11, 19 kDa             | gi 114053349,gi 122138212,gi 82571590  | 22,457.80  | 100.00% | 5 | 6 | 14 | 0.14% | 15.30% | VIIPSHL<br>AYGK                     | 2.78 | 1,197.70 |
| Control | 6018 | FK506 binding protein 11, 19 kDa             | gi 114053349,gi 122138212,gi 82571590  | 22,457.80  | 100.00% | 5 | 6 | 14 | 0.14% | 15.30% | VIIPSHL<br>AYGKR                    | 1.95 | 1,353.80 |
| Control | 6018 | SPTLC2 protein                               | gi 148745525,gi 149642795              | 62,871.50  | 100.00% | 2 | 2 | 3  | 0.03% | 6.58%  | EEQKDF<br>VSLYQD<br>FENFYT<br>R     | 4.05 | 2,458.12 |
| Control | 6018 | SPTLC2 protein                               | gi 148745525,gi 149642795              | 62,871.50  | 100.00% | 2 | 2 | 3  | 0.03% | 6.58%  | NIGVVV<br>VGFPAT<br>PIESR           | 6.04 | 1,868.06 |
| Control | 6018 | endoglin                                     | gi 11549710,gi 92097469                | 69,885.10  | 99.80%  | 2 | 3 | 6  | 0.06% | 3.25%  | FSLLR                               | 1.75 | 782.4559 |
| Control | 6018 | endoglin                                     | gi 11549710,gi 92097469                | 69,885.10  | 99.80%  | 2 | 3 | 6  | 0.06% | 3.25%  | LQAPGIP<br>LQLAYD<br>SK             | 4.56 | 1,613.89 |
| Control | 6018 | PREDICTED: similar to neuropilin-1 isoform 1 | gi 76632212,gi 76632226                | 102,993.80 | 100.00% | 3 | 3 | 4  | 0.04% | 5.31%  | DKLNPQ<br>STYSEA                    | 3.58 | 1,352.63 |
| Control | 6018 | PREDICTED: similar to neuropilin-1 isoform 1 | gi 76632212,gi 76632226                | 102,993.80 | 100.00% | 3 | 3 | 4  | 0.04% | 5.31%  | SFEGNN<br>NYDTPE<br>LR              | 4.21 | 1,655.73 |
| Control | 6018 | PREDICTED: similar to neuropilin-1 isoform 1 | gi 76632212,gi 76632226                | 102,993.80 | 100.00% | 3 | 3 | 4  | 0.04% | 5.31%  | TGPIQDH<br>TGDGNFI<br>YSQADE<br>NQQ | 5.54 | 2,535.14 |
| Control | 6018 | PREDICTED: similar to pincher isoform 1      | gi 76627466                            | 61,009.90  | 100.00% | 3 | 3 | 3  | 0.03% | 7.96%  | GGTGAD<br>PVQTVT<br>GGLR            | 3.72 | 1,485.77 |
| Control | 6018 | PREDICTED: similar to pincher isoform 1      | gi 76627466                            | 61,009.90  | 100.00% | 3 | 3 | 3  | 0.03% | 7.96%  | LIEAVDN<br>MLTNK                    | 3.38 | 1,376.71 |
| Control | 6018 | PREDICTED: similar to pincher isoform 1      | gi 76627466                            | 61,009.90  | 100.00% | 3 | 3 | 3  | 0.03% | 7.96%  | SISIIDSP<br>GILSGEK                 | 4.02 | 1,515.83 |
| Control | 6018 | RPS7 protein                                 | gi 148877374,gi 149642623,gi 205806695 | 22,109.50  | 100.00% | 3 | 3 | 4  | 0.04% | 17.50% | DVNFEF<br>PEFQL                     | 2.98 | 1,384.64 |
| Control | 6018 | RPS7 protein                                 | gi 148877374,gi 149642623,gi 205806695 | 22,109.50  | 100.00% | 3 | 3 | 4  | 0.04% | 17.50% | TLTAVH<br>DAILEDL<br>VFPSEIV<br>GK  | 4.33 | 2,367.28 |
| Control | 6018 | RPS7 protein                                 | gi 148877374,gi 149642623,gi 205806695 | 22,109.50  | 100.00% | 3 | 3 | 4  | 0.04% | 17.50% | TLTAVH<br>DAILEDL<br>VFPSEIV<br>GKR | 4.73 | 2,523.38 |

|         |      |                                                                                                         |                                                                                                 |           |         |   |   |   |       |        |                                                   |          |
|---------|------|---------------------------------------------------------------------------------------------------------|-------------------------------------------------------------------------------------------------|-----------|---------|---|---|---|-------|--------|---------------------------------------------------|----------|
| Control | 6018 | ERGIC<br>and golgi<br>2                                                                                 | gi 1139121<br>14,gi 11549<br>7448                                                               | 42,596.10 | 99.80%  | 2 | 2 | 2 | 0.02% | 9.28%  | IDHLSFG 3.55<br>ELVPGII<br>NPLDGT<br>EK           | 2,364.25 |
| Control | 6018 | ERGIC<br>and golgi<br>2                                                                                 | gi 1139121<br>14,gi 11549<br>7448                                                               | 42,596.10 | 99.80%  | 2 | 2 | 2 | 0.02% | 9.28%  | ISADTHQ 2.44<br>FAVTER                            | 1,474.73 |
| Control | 6018 | heme<br>oxygenas<br>e<br>(decyclin<br>g) 2                                                              | gi 1644487<br>21                                                                                | 37,538.70 | 100.00% | 3 | 4 | 4 | 0.04% | 14.10% | AFEFNM 3.92<br>QVFNEL<br>DQAGSL<br>LAK            | 2,388.15 |
| Control | 6018 | heme<br>oxygenas<br>e<br>(decyclin<br>g) 2                                                              | gi 1644487<br>21                                                                                | 37,538.70 | 100.00% | 3 | 4 | 4 | 0.04% | 14.10% | LPTQDG 2.55<br>LPVHDG<br>K                        | 1,376.72 |
| Control | 6018 | heme<br>oxygenas<br>e<br>(decyclin<br>g) 2                                                              | gi 1644487<br>21                                                                                | 37,538.70 | 100.00% | 3 | 4 | 4 | 0.04% | 14.10% | YMGDLS 3.02<br>GGQVLK<br>K                        | 1,411.73 |
| Control | 6018 | endotheli<br>al<br>differenti<br>ation,<br>sphingoli<br>pid G-<br>protein-<br>coupled<br>receptor,<br>1 | gi 5985811<br>9,gi 606502<br>08,gi 60650<br>268,gi 6188<br>9066,gi 750<br>70049,gi 88<br>954151 | 42,933.90 | 99.80%  | 2 | 2 | 2 | 0.02% | 10.70% | FTRPIIA 4.77<br>GMEFSR                            | 1,540.79 |
| Control | 6018 | endotheli<br>al<br>differenti<br>ation,<br>sphingoli<br>pid G-<br>protein-<br>coupled<br>receptor,<br>1 | gi 5985811<br>9,gi 606502<br>08,gi 60650<br>268,gi 6188<br>9066,gi 750<br>70049,gi 88<br>954151 | 42,933.90 | 99.80%  | 2 | 2 | 2 | 0.02% | 10.70% | SDNSSH 4.05<br>PQKDDG<br>DNPETI<br>MSSGNV<br>NSSS | 2,922.19 |
| Control | 6018 | PREDIC<br>TED:<br>similar to<br>mKIAA4<br>036<br>protein<br>isoform 2                                   | gi 1199175<br>18                                                                                | 67,513.30 | 100.00% | 3 | 4 | 4 | 0.04% | 8.01%  | SISYHE 4.09<br>TLGEAL<br>QGVELE<br>FSGLDIK        | 2,872.44 |
| Control | 6018 | PREDIC<br>TED:<br>similar to<br>mKIAA4<br>036<br>protein<br>isoform 2                                   | gi 1199175<br>18                                                                                | 67,513.30 | 100.00% | 3 | 4 | 4 | 0.04% | 8.01%  | VNAVPR 2.13<br>PIPEK                              | 1,219.72 |
| Control | 6018 | PREDIC<br>TED:<br>similar to<br>mKIAA4<br>036<br>protein<br>isoform 2                                   | gi 1199175<br>18                                                                                | 67,513.30 | 100.00% | 3 | 4 | 4 | 0.04% | 8.01%  | YLDPSFF 2.35<br>QHR                               | 1,309.63 |



|         |      |                                                                                                                                    |            |           |         |   |   |   |       |        |                         |      |          |
|---------|------|------------------------------------------------------------------------------------------------------------------------------------|------------|-----------|---------|---|---|---|-------|--------|-------------------------|------|----------|
| Control | 6018 | PREDICTED:<br>similar to<br>Transmembrane<br>emp24<br>domain-containing<br>protein 2<br>precursor<br>(Membrane<br>protein<br>p24A) | gi 1946746 | 22,715.40 | 99.80%  | 2 | 2 | 9 | 0.09% | 12.40% | IVMFTID<br>IGEAPK       | 3.97 | 1,449.77 |
| Control | 6018 | PREDICTED:<br>similar to<br>Transmembrane<br>emp24<br>domain-containing<br>protein 2<br>precursor<br>(Membrane<br>protein<br>p24A) | gi 1946746 | 22,715.40 | 99.80%  | 2 | 2 | 9 | 0.09% | 12.40% | YTFAAH<br>MDGTY<br>K    | 4    | 1,420.62 |
| Control | 6018 | PREDICTED:<br>integrin,<br>beta 3<br>(platelet<br>glycoprotein<br>IIIa,<br>antigen<br>CD61)<br>isoform 1                           | gi 7667065 | 86,518.30 | 100.00% | 5 | 7 | 7 | 0.07% | 6.12%  | EATSTFT<br>NITYR        | 3.46 | 1,403.68 |
| Control | 6018 | PREDICTED:<br>integrin,<br>beta 3<br>(platelet<br>glycoprotein<br>IIIa,<br>antigen<br>CD61)<br>isoform 1                           | gi 7667065 | 86,518.30 | 100.00% | 5 | 7 | 7 | 0.07% | 6.12%  | GTGDSS<br>QITQVSP<br>QR | 3.97 | 1,560.76 |
| Control | 6018 | PREDICTED:<br>integrin,<br>beta 3<br>(platelet<br>glycoprotein<br>IIIa,<br>antigen<br>CD61)<br>isoform 1                           | gi 7667065 | 86,518.30 | 100.00% | 5 | 7 | 7 | 0.07% | 6.12%  | HVLTLT<br>DQVTR         | 3.04 | 1,282.71 |

|         |      |                                                                                                    |                                                                  |           |         |   |   |    |       |        |                                       |      |          |
|---------|------|----------------------------------------------------------------------------------------------------|------------------------------------------------------------------|-----------|---------|---|---|----|-------|--------|---------------------------------------|------|----------|
| Control | 6018 | PREDICTED:<br>integrin,<br>beta 3<br>(platelet<br>glycoprotein IIIa,<br>antigen CD61)<br>isoform 1 | gi 7667065<br>7                                                  | 86,518.30 | 100.00% | 5 | 7 | 7  | 0.07% | 6.12%  | ILEARPL<br>SDKGTG<br>DSSQITQ<br>VSPQR | 6.1  | 2,683.40 |
| Control | 6018 | PREDICTED:<br>integrin,<br>beta 3<br>(platelet<br>glycoprotein IIIa,<br>antigen CD61)<br>isoform 1 | gi 7667065<br>7                                                  | 86,518.30 | 100.00% | 5 | 7 | 7  | 0.07% | 6.12%  | PLSDKG<br>TGDSSQI<br>TQVSPQ<br>R      | 5.58 | 2,101.05 |
| Control | 6018 | heat shock<br>90kDa<br>protein 1,<br>beta                                                          | gi 1186018<br>68,gi 34392<br>345,gi 7507<br>2499,gi 957<br>67684 | 83,238.20 | 100.00% | 7 | 7 | 11 | 0.11% | 14.80% | ADLVNN<br>LGTIAK                      | 3.67 | 1,228.69 |
| Control | 6018 | heat shock<br>90kDa<br>protein 1,<br>beta                                                          | gi 1186018<br>68,gi 34392<br>345,gi 7507<br>2499,gi 957<br>67684 | 83,238.20 | 100.00% | 7 | 7 | 11 | 0.11% | 14.80% | EDQTEY<br>LEER                        | 2.7  | 1,311.57 |
| Control | 6018 | heat shock<br>90kDa<br>protein 1,<br>beta                                                          | gi 1186018<br>68,gi 34392<br>345,gi 7507<br>2499,gi 957<br>67684 | 83,238.20 | 100.00% | 7 | 7 | 11 | 0.11% | 14.80% | ELISNAS<br>DALDK                      | 3.35 | 1,275.64 |
| Control | 6018 | heat shock<br>90kDa<br>protein 1,<br>beta                                                          | gi 1186018<br>68,gi 34392<br>345,gi 7507<br>2499,gi 957<br>67684 | 83,238.20 | 100.00% | 7 | 7 | 11 | 0.11% | 14.80% | ELISNAS<br>DALDKI<br>R                | 3.7  | 1,544.83 |
| Control | 6018 | heat shock<br>90kDa<br>protein 1,<br>beta                                                          | gi 1186018<br>68,gi 34392<br>345,gi 7507<br>2499,gi 957<br>67684 | 83,238.20 | 100.00% | 7 | 7 | 11 | 0.11% | 14.80% | GVVDSE<br>DLPLNIS<br>R                | 4.57 | 1,513.79 |
| Control | 6018 | heat shock<br>90kDa<br>protein 1,<br>beta                                                          | gi 1186018<br>68,gi 34392<br>345,gi 7507<br>2499,gi 957<br>67684 | 83,238.20 | 100.00% | 7 | 7 | 11 | 0.11% | 14.80% | HSQFIGY<br>PITLYLE<br>K               | 2.97 | 1,808.96 |
| Control | 6018 | heat shock<br>90kDa<br>protein 1,<br>beta                                                          | gi 1186018<br>68,gi 34392<br>345,gi 7507<br>2499,gi 957<br>67684 | 83,238.20 | 100.00% | 7 | 7 | 11 | 0.11% | 14.80% | NPDDITQ<br>EEYGEF<br>YK               | 2.83 | 1,847.80 |
| Control | 6018 | heat shock<br>90kDa<br>protein 1,<br>beta                                                          | gi 1186018<br>68,gi 34392<br>345,gi 7507<br>2499,gi 957<br>67684 | 83,238.20 | 100.00% | 7 | 7 | 11 | 0.11% | 14.80% | TLTLVD<br>TGIGMT<br>K                 | 4.31 | 1,365.73 |
| Control | 6018 | heat shock<br>90kDa<br>protein 1,<br>beta                                                          | gi 1186018<br>68,gi 34392<br>345,gi 7507<br>2499,gi 957<br>67684 | 83,238.20 | 100.00% | 7 | 7 | 11 | 0.11% | 14.80% | YESLTD<br>PSKLDS<br>GK                | 3.95 | 1,539.75 |



|         |      |                                                                                                                                                                                                                                                                               |                                                      |           |         |   |   |       |        |            |                              |         |          |
|---------|------|-------------------------------------------------------------------------------------------------------------------------------------------------------------------------------------------------------------------------------------------------------------------------------|------------------------------------------------------|-----------|---------|---|---|-------|--------|------------|------------------------------|---------|----------|
| Control | 6018 | RecName gi 1141585 :<br>76,gi 14618<br>Full=Adi ponectin;<br>AltName:<br>Full=Adi pocyte,<br>C1q and collagen domain-<br>containin g protein;<br>AltName:<br>Full=30 kDa adipocyte complem ent-<br>related protein;<br>AltName:<br>Full=Adi pocyte complem ent-<br>related 30 | 26,115.60                                            | 100.00%   | 3       | 4 | 5 | 0.05% | 16.20% | SAFSVG LER | 2.24                         | 965.505 |          |
| Control | 6018 | Solute carrier family 1 (neutral amino acid transporter), member 5                                                                                                                                                                                                            | gi 1153052 16,gi 15145 909,gi 2154 1958,gi 278 07087 | 56,431.20 | 99.80%  | 2 | 2 | 3     | 0.03%  | 4.45%      | EVLDSFL DLVR                 | 2.76    | 1,305.71 |
| Control | 6018 | Solute carrier family 1 (neutral amino acid transporter), member 5                                                                                                                                                                                                            | gi 1153052 16,gi 15145 909,gi 2154 1958,gi 278 07087 | 56,431.20 | 99.80%  | 2 | 2 | 3     | 0.03%  | 4.45%      | NIFPSNL VSAAFR               | 2.31    | 1,435.77 |
| Control | 6018 | PREDICTED: protein disulfide isomerase family A, member 6 isoform 7                                                                                                                                                                                                           | gi 1199039 61,gi 15155 3573                          | 64,497.70 | 100.00% | 5 | 5 | 5     | 0.05%  | 14.20%     | ALDLFS DNAPPP ELLEIINE DVAKK | 2.51    | 2,751.45 |
| Control | 6018 | PREDICTED: protein disulfide isomerase family A, member 6 isoform 7                                                                                                                                                                                                           | gi 1199039 61,gi 15155 3573                          | 64,497.70 | 100.00% | 5 | 5 | 5     | 0.05%  | 14.20%     | GSFSEQ GINEFLR               | 3.79    | 1,483.72 |

|         |      |                                                                      |                                                                                                                        |           |         |   |   |   |       |        |                                                                 |      |          |
|---------|------|----------------------------------------------------------------------|------------------------------------------------------------------------------------------------------------------------|-----------|---------|---|---|---|-------|--------|-----------------------------------------------------------------|------|----------|
| Control | 6018 | PREDIC TED: protein disulfide isomerase family A, member 6 isoform 7 | gi 119903961.gi 151553573                                                                                              | 64,497.70 | 100.00% | 5 | 5 | 5 | 0.05% | 14.20% | GSTAPV<br>GGGAFP<br>TISTR                                       | 3.49 | 1,575.81 |
| Control | 6018 | PREDIC TED: protein disulfide isomerase family A, member 6 isoform 7 | gi 119903961.gi 151553573                                                                                              | 64,497.70 | 100.00% | 5 | 5 | 5 | 0.05% | 14.20% | LAAVDA<br>TVNQVL<br>ASR                                         | 3.58 | 1,527.85 |
| Control | 6018 | PREDIC TED: protein disulfide isomerase family A, member 6 isoform 7 | gi 119903961.gi 151553573                                                                                              | 64,497.70 | 100.00% | 5 | 5 | 5 | 0.05% | 14.20% | TGEAIV<br>DAALSA<br>LR                                          | 2.68 | 1,386.76 |
| Control | 6018 | hypothetical protein LOC506149                                       | gi 114052080.gi 122136337.gi 85057041                                                                                  | 11,432.50 | 99.80%  | 2 | 2 | 3 | 0.03% | 22.40% | MSFGLL<br>R                                                     | 2.03 | 839.4445 |
| Control | 6018 | hypothetical protein LOC506149                                       | gi 114052080.gi 122136337.gi 85057041                                                                                  | 11,432.50 | 99.80%  | 2 | 2 | 3 | 0.03% | 22.40% | VFSIVIPF<br>LYVGTLI<br>SK                                       | 2.8  | 1,896.12 |
| Control | 6018 | cytochrome c oxidase subunit 2                                       | gi 33321665.gi 7098804.gi 70988032.gi 70988046.gi 70988060.gi 70988074.gi 70988088.gi 70988102.gi 70988116.gi 70988130 | 26,004.80 | 99.80%  | 2 | 3 | 3 | 0.03% | 24.20% | ILYMMD<br>EINNPSL<br>TVK                                        | 3.65 | 1,896.94 |
| Control | 6018 | cytochrome c oxidase subunit 2                                       | gi 33321665.gi 7098804.gi 70988032.gi 70988046.gi 70988060.gi 70988074.gi 70988088.gi 70988102.gi 70988116.gi 70988130 | 26,004.80 | 99.80%  | 2 | 3 | 3 | 0.03% | 24.20% | LNQTTL<br>MSSRPG<br>LYYGQC<br>SEICGSN<br>HSFMPIV<br>LELVPL<br>K | 2.99 | 4,342.14 |

|         |      |                                                                                  |                                                                           |            |         |    |    |    |       |        |                                                       |      |          |
|---------|------|----------------------------------------------------------------------------------|---------------------------------------------------------------------------|------------|---------|----|----|----|-------|--------|-------------------------------------------------------|------|----------|
| Control | 6018 | Deoxyribonuclease 71 I-like 1                                                    | gi 1515535                                                                | 35,175.30  | 99.80%  | 2  | 2  | 2  | 0.02% | 8.86%  | IVLHGE<br>HLQSLLR                                     | 2.24 | 1,514.88 |
| Control | 6018 | Deoxyribonuclease 71 I-like 1                                                    | gi 1515535                                                                | 35,175.30  | 99.80%  | 2  | 2  | 2  | 0.02% | 8.86%  | VLPSLVLP<br>VPLHTT<br>PK                              | 3.89 | 1,614.00 |
| ATP     | 6006 | Chain B, Subcomplex Of The Stator Of Bovine Mitochondrial Atp Synthase           | gi 1105910<br>27,gi 110591030,gi 114686,gi 27807305,gi 599873,gi 74356487 | 18,544.10  | 99.80%  | 2  | 2  | 2  | 0.02% | 19.40% | IQEYEKE<br>LEK                                        | 3.29 | 1,308.67 |
| ATP     | 6006 | Chain B, Subcomplex Of The Stator Of Bovine Mitochondrial Atp Synthase           | gi 1105910<br>27,gi 110591030,gi 114686,gi 27807305,gi 599873,gi 74356487 | 18,544.10  | 99.80%  | 2  | 2  | 2  | 0.02% | 19.40% | NIIPFDQ<br>MTIEDL<br>NEVFPE<br>TK                     | 2.52 | 2,509.22 |
| ATP     | 6006 | PREDICTED: integrin, alpha 5 (fibronectin receptor, alpha polypeptide) isoform 3 | gi 1946670<br>41                                                          | 119,589.00 | 100.00% | 10 | 11 | 17 | 0.18% | 15.20% | AQILLDC<br>GEDNIC<br>VPDLQL<br>EVFGEQ<br>NHVYLG<br>DK | 4.26 | 3,687.77 |
| ATP     | 6006 | PREDICTED: integrin, alpha 5 (fibronectin receptor, alpha polypeptide) isoform 3 | gi 1946670<br>41                                                          | 119,589.00 | 100.00% | 10 | 11 | 17 | 0.18% | 15.20% | DLDGNG<br>YPDLVIG<br>SFGVDK                           | 3.65 | 1,980.96 |
| ATP     | 6006 | PREDICTED: integrin, alpha 5 (fibronectin receptor, alpha polypeptide) isoform 3 | gi 1946670<br>41                                                          | 119,589.00 | 100.00% | 10 | 11 | 17 | 0.18% | 15.20% | DVPGRS<br>PASSGP<br>QILK                              | 3.96 | 1,608.87 |
| ATP     | 6006 | PREDICTED: integrin, alpha 5 (fibronectin receptor, alpha polypeptide) isoform 3 | gi 1946670<br>41                                                          | 119,589.00 | 100.00% | 10 | 11 | 17 | 0.18% | 15.20% | FGSSLTP<br>LGDLDQ<br>DGYNDV<br>AIGAAF<br>GGENR        | 3.68 | 3,056.42 |

|     |      |                                                                                                                   |                  |            |         |    |    |    |       |        |                                    |      |          |
|-----|------|-------------------------------------------------------------------------------------------------------------------|------------------|------------|---------|----|----|----|-------|--------|------------------------------------|------|----------|
| ATP | 6006 | PREDIC<br>TED:<br>integrin,<br>alpha 5<br>(fibronect<br>in<br>receptor,<br>alpha<br>polypepti<br>de)<br>isoform 3 | gi 1946670<br>41 | 119,589.00 | 100.00% | 10 | 11 | 17 | 0.18% | 15.20% | GGRDLD<br>GNGYPD<br>LIVGSFG<br>VDK | 3.09 | 2,251.10 |
| ATP | 6006 | PREDIC<br>TED:<br>integrin,<br>alpha 5<br>(fibronect<br>in<br>receptor,<br>alpha<br>polypepti<br>de)<br>isoform 3 | gi 1946670<br>41 | 119,589.00 | 100.00% | 10 | 11 | 17 | 0.18% | 15.20% | LAGMEP<br>TPTLTLT<br>GQDEFG<br>R   | 4.59 | 2,150.04 |
| ATP | 6006 | PREDIC<br>TED:<br>integrin,<br>alpha 5<br>(fibronect<br>in<br>receptor,<br>alpha<br>polypepti<br>de)<br>isoform 3 | gi 1946670<br>41 | 119,589.00 | 100.00% | 10 | 11 | 17 | 0.18% | 15.20% | QATLTQ<br>LLIQNG<br>AR             | 4.05 | 1,627.91 |
| ATP | 6006 | PREDIC<br>TED:<br>integrin,<br>alpha 5<br>(fibronect<br>in<br>receptor,<br>alpha<br>polypepti<br>de)<br>isoform 3 | gi 1946670<br>41 | 119,589.00 | 100.00% | 10 | 11 | 17 | 0.18% | 15.20% | TIQFDFQ<br>ILSK                    | 3.15 | 1,339.73 |
| ATP | 6006 | PREDIC<br>TED:<br>integrin,<br>alpha 5<br>(fibronect<br>in<br>receptor,<br>alpha<br>polypepti<br>de)<br>isoform 3 | gi 1946670<br>41 | 119,589.00 | 100.00% | 10 | 11 | 17 | 0.18% | 15.20% | VTAPPE<br>AEYSGL<br>VR             | 3.35 | 1,488.77 |
| ATP | 6006 | PREDIC<br>TED:<br>integrin,<br>alpha 5<br>(fibronect<br>in<br>receptor,<br>alpha<br>polypepti<br>de)<br>isoform 3 | gi 1946670<br>41 | 119,589.00 | 100.00% | 10 | 11 | 17 | 0.18% | 15.20% | VYIYLQ<br>R                        | 2.7  | 954.5407 |

|     |      |                                                                          |                                                                                                 |           |         |   |   |   |       |        |                                                  |          |
|-----|------|--------------------------------------------------------------------------|-------------------------------------------------------------------------------------------------|-----------|---------|---|---|---|-------|--------|--------------------------------------------------|----------|
| ATP | 6006 | PREDICTED:<br>similar to EGF-like repeats and discoidin I-like domains 3 | gi 119895885                                                                                    | 52,071.20 | 100.00% | 2 | 2 | 2 | 0.02% | 9.03%  | DKVFQG 3.2<br>NFDNDT<br>HRK                      | 1,820.87 |
| ATP | 6006 | PREDICTED:<br>similar to EGF-like repeats and discoidin I-like domains 3 | gi 119895885                                                                                    | 52,071.20 | 100.00% | 2 | 2 | 2 | 0.02% | 9.03%  | GTNEDM 3.23<br>VFHGNV<br>DNNTPY<br>ANSFTPP<br>IK | 2,995.35 |
| ATP | 6006 | caveolin-1                                                               | gi 1840144,<br>gi 2493547,<br>gi 2780671<br>5,gi 383227<br>01,gi 56181<br>138                   | 20,577.50 | 100.00% | 2 | 4 | 9 | 0.09% | 14.00% | YVDSEG 2.64<br>HLYTVPI<br>R                      | 1,648.83 |
| ATP | 6006 | caveolin-1                                                               | gi 1840144,<br>gi 2493547,<br>gi 2780671<br>5,gi 383227<br>01,gi 56181<br>138                   | 20,577.50 | 100.00% | 2 | 4 | 9 | 0.09% | 14.00% | YVDSEG 5.57<br>HLYTVPI<br>REQGNI<br>YKPNNK       | 2,934.47 |
| ATP | 6006 | RTN3 protein                                                             | gi 115305093,gi 12213<br>2179,gi 146<br>231798,gi 1<br>51554368,gi 32880223,<br>gi 3832759<br>4 | 25,478.60 | 99.80%  | 2 | 3 | 4 | 0.04% | 5.49%  | TQIDHY 3.41<br>VGIAR                             | 1,272.67 |
| ATP | 6006 | RTN3 protein                                                             | gi 115305093,gi 12213<br>2179,gi 146<br>231798,gi 1<br>51554368,gi 32880223,<br>gi 3832759<br>4 | 25,478.60 | 99.80%  | 2 | 3 | 4 | 0.04% | 5.49%  | YKTQID 3.54<br>HYVGIA<br>R                       | 1,563.83 |
| ATP | 6006 | LMAN2 protein                                                            | gi 151553875,gi 15537<br>2333                                                                   | 40,385.10 | 100.00% | 6 | 7 | 8 | 0.08% | 23.40% | DNFHGL 3.45<br>AIFLDY<br>PNDETT<br>ER            | 2,468.14 |
| ATP | 6006 | LMAN2 protein                                                            | gi 151553875,gi 15537<br>2333                                                                   | 40,385.10 | 100.00% | 6 | 7 | 8 | 0.08% | 23.40% | DNVDDP 3.22<br>TGNFR                             | 1,249.54 |
| ATP | 6006 | LMAN2 protein                                                            | gi 151553875,gi 15537<br>2333                                                                   | 40,385.10 | 100.00% | 6 | 7 | 8 | 0.08% | 23.40% | DRLVPG 2.69<br>PVFGSK                            | 1,271.71 |
| ATP | 6006 | LMAN2 protein                                                            | gi 151553875,gi 15537<br>2333                                                                   | 40,385.10 | 100.00% | 6 | 7 | 8 | 0.08% | 23.40% | LPTGY 4.91<br>FGASAG<br>TGDLS<br>NHDIISM<br>K    | 2,746.27 |
| ATP | 6006 | LMAN2 protein                                                            | gi 151553875,gi 15537<br>2333                                                                   | 40,385.10 | 100.00% | 6 | 7 | 8 | 0.08% | 23.40% | NRDHT 3.24<br>FLAVR                              | 1,343.68 |
| ATP | 6006 | LMAN2 protein                                                            | gi 151553875,gi 15537<br>2333                                                                   | 40,385.10 | 100.00% | 6 | 7 | 8 | 0.08% | 23.40% | SPKDNV 3.99<br>DDPTGN<br>FR                      | 1,561.72 |



|     |      |                                                                           |                                                                                            |            |         |    |    |    |       |        |                                 |          |
|-----|------|---------------------------------------------------------------------------|--------------------------------------------------------------------------------------------|------------|---------|----|----|----|-------|--------|---------------------------------|----------|
| ATP | 6006 | RPS9 protein                                                              | gi 151554648,gi 151554779,gi 155372029,gi 189044386,gi 190576593,gi 197215709,gi 217418300 | 22,574.50  | 99.70%  | 2  | 2  | 2  | 0.02% | 9.79%  | LIGEYGL 2.25 R                  | 920.5201 |
| ATP | 6006 | RPS9 protein                                                              | gi 151554648,gi 151554779,gi 155372029,gi 189044386,gi 190576593,gi 197215709,gi 217418300 | 22,574.50  | 99.70%  | 2  | 2  | 2  | 0.02% | 9.79%  | QVVNIPS 2.59 FIVR               | 1,271.75 |
| ATP | 6006 | PREDICTED: similar to polypeptide of N-acetylgalactosaminyltransferase 2  | gi 119918373                                                                               | 64,740.20  | 100.00% | 3  | 3  | 4  | 0.04% | 6.83%  | EIILVDD 3.39 YSNDPE DGALLG K    | 2,176.07 |
| ATP | 6006 | PREDICTED: similar to polypeptide of N-acetylgalactosaminyltransferase 2  | gi 119918373                                                                               | 64,740.20  | 100.00% | 3  | 3  | 4  | 0.04% | 6.83%  | EIILVDD 3.62 YSNDPE DGALLG KIEK | 2,546.29 |
| ATP | 6006 | PREDICTED: similar to polypeptide of N-acetylgalactosaminyltransferase 2  | gi 119918373                                                                               | 64,740.20  | 100.00% | 3  | 3  | 4  | 0.04% | 6.83%  | QHPYTF 3.14 PGGSGT VFAR         | 1,721.84 |
| ATP | 6006 | ATPase, Na <sup>+</sup> /K <sup>+</sup> transporting, alpha 1 polypeptide | gi 115305284,gi 116003819,gi 122132194                                                     | 112,627.60 | 100.00% | 25 | 44 | 68 | 0.72% | 26.20% | ADIGVA 4.92 MGIAGS DVSK         | 1,506.75 |
| ATP | 6006 | ATPase, Na <sup>+</sup> /K <sup>+</sup> transporting, alpha 1 polypeptide | gi 115305284,gi 116003819,gi 122132194                                                     | 112,627.60 | 100.00% | 25 | 44 | 68 | 0.72% | 26.20% | AVAGDA 4.07 SESALLK             | 1,231.65 |
| ATP | 6006 | ATPase, Na <sup>+</sup> /K <sup>+</sup> transporting, alpha 1 polypeptide | gi 115305284,gi 116003819,gi 122132194                                                     | 112,627.60 | 100.00% | 25 | 44 | 68 | 0.72% | 26.20% | AVFQAN 3.52 QDNLPIL K           | 1,570.86 |

|     |      |                                                  |                                        |            |         |    |    |    |       |        |                           |      |          |
|-----|------|--------------------------------------------------|----------------------------------------|------------|---------|----|----|----|-------|--------|---------------------------|------|----------|
| ATP | 6006 | ATPase, Na+/K+ transporting, alpha 1 polypeptide | gi 115305284.gi 116003819.gi 122132194 | 112,627.60 | 100.00% | 25 | 44 | 68 | 0.72% | 26.20% | AVFQAN QDNLPILKR          | 2.36 | 1,726.96 |
| ATP | 6006 | ATPase, Na+/K+ transporting, alpha 1 polypeptide | gi 115305284.gi 116003819.gi 122132194 | 112,627.60 | 100.00% | 25 | 44 | 68 | 0.72% | 26.20% | EQPLDE ELKDAFQAYLELGGLGER | 3.9  | 2,834.38 |
| ATP | 6006 | ATPase, Na+/K+ transporting, alpha 1 polypeptide | gi 115305284.gi 116003819.gi 122132194 | 112,627.60 | 100.00% | 25 | 44 | 68 | 0.72% | 26.20% | EVSMDD HKLSLDELHR         | 3.79 | 1,939.92 |
| ATP | 6006 | ATPase, Na+/K+ transporting, alpha 1 polypeptide | gi 115305284.gi 116003819.gi 122132194 | 112,627.60 | 100.00% | 25 | 44 | 68 | 0.72% | 26.20% | EVSMDD HKLSLDELHRK        | 2.75 | 2,068.01 |
| ATP | 6006 | ATPase, Na+/K+ transporting, alpha 1 polypeptide | gi 115305284.gi 116003819.gi 122132194 | 112,627.60 | 100.00% | 25 | 44 | 68 | 0.72% | 26.20% | GIVVYT GDR                | 2.74 | 979.5208 |
| ATP | 6006 | ATPase, Na+/K+ transporting, alpha 1 polypeptide | gi 115305284.gi 116003819.gi 122132194 | 112,627.60 | 100.00% | 25 | 44 | 68 | 0.72% | 26.20% | GIVVYT GDRTVMGR           | 1.69 | 1,539.80 |
| ATP | 6006 | ATPase, Na+/K+ transporting, alpha 1 polypeptide | gi 115305284.gi 116003819.gi 122132194 | 112,627.60 | 100.00% | 25 | 44 | 68 | 0.72% | 26.20% | GVGIISE GNETVEDIAAR       | 4.84 | 1,829.92 |
| ATP | 6006 | ATPase, Na+/K+ transporting, alpha 1 polypeptide | gi 115305284.gi 116003819.gi 122132194 | 112,627.60 | 100.00% | 25 | 44 | 68 | 0.72% | 26.20% | IVEIPFNS TNK              | 2.87 | 1,261.68 |
| ATP | 6006 | ATPase, Na+/K+ transporting, alpha 1 polypeptide | gi 115305284.gi 116003819.gi 122132194 | 112,627.60 | 100.00% | 25 | 44 | 68 | 0.72% | 26.20% | IVEIPFNS TNKYQLSIHK       | 2.15 | 2,131.15 |
| ATP | 6006 | ATPase, Na+/K+ transporting, alpha 1 polypeptide | gi 115305284.gi 116003819.gi 122132194 | 112,627.60 | 100.00% | 25 | 44 | 68 | 0.72% | 26.20% | KADIGV AMGIAGSDVSK        | 4.26 | 1,634.84 |

|     |      |                                                  |                                        |            |         |    |    |    |       |        |                                                    |          |
|-----|------|--------------------------------------------------|----------------------------------------|------------|---------|----|----|----|-------|--------|----------------------------------------------------|----------|
| ATP | 6006 | ATPase, Na+/K+ transporting, alpha 1 polypeptide | gi 115305284.gi 116003819.gi 122132194 | 112,627.60 | 100.00% | 25 | 44 | 68 | 0.72% | 26.20% | LNIPVSQ 4.68<br>VNPR                               | 1,236.71 |
| ATP | 6006 | ATPase, Na+/K+ transporting, alpha 1 polypeptide | gi 115305284.gi 116003819.gi 122132194 | 112,627.60 | 100.00% | 25 | 44 | 68 | 0.72% | 26.20% | LSLDEL 2.55<br>HR                                  | 982.5317 |
| ATP | 6006 | ATPase, Na+/K+ transporting, alpha 1 polypeptide | gi 115305284.gi 116003819.gi 122132194 | 112,627.60 | 100.00% | 25 | 44 | 68 | 0.72% | 26.20% | MSINAE 3.78<br>EVVVGD<br>LVEVK                     | 1,846.95 |
| ATP | 6006 | ATPase, Na+/K+ transporting, alpha 1 polypeptide | gi 115305284.gi 116003819.gi 122132194 | 112,627.60 | 100.00% | 25 | 44 | 68 | 0.72% | 26.20% | NMVPQQ 3.5<br>ALVIR                                | 1,284.71 |
| ATP | 6006 | ATPase, Na+/K+ transporting, alpha 1 polypeptide | gi 115305284.gi 116003819.gi 122132194 | 112,627.60 | 100.00% | 25 | 44 | 68 | 0.72% | 26.20% | QAADMI 3.54<br>LLDDNF<br>ASIVTGV<br>EEGR           | 2,480.20 |
| ATP | 6006 | ATPase, Na+/K+ transporting, alpha 1 polypeptide | gi 115305284.gi 116003819.gi 122132194 | 112,627.60 | 100.00% | 25 | 44 | 68 | 0.72% | 26.20% | QAADMI 5.3<br>LLDDNF<br>ASIVTGV<br>EEGLIF<br>DNLKK | 3,451.78 |
| ATP | 6006 | ATPase, Na+/K+ transporting, alpha 1 polypeptide | gi 115305284.gi 116003819.gi 122132194 | 112,627.60 | 100.00% | 25 | 44 | 68 | 0.72% | 26.20% | QGAIVA 4.79<br>VTGDGV<br>NDSPAL<br>K               | 1,811.95 |
| ATP | 6006 | ATPase, Na+/K+ transporting, alpha 1 polypeptide | gi 115305284.gi 116003819.gi 122132194 | 112,627.60 | 100.00% | 25 | 44 | 68 | 0.72% | 26.20% | QGAIVA 3.83<br>VTGDGV<br>NDSPAL<br>KK              | 1,940.05 |
| ATP | 6006 | ATPase, Na+/K+ transporting, alpha 1 polypeptide | gi 115305284.gi 116003819.gi 122132194 | 112,627.60 | 100.00% | 25 | 44 | 68 | 0.72% | 26.20% | RAVAGD 3.01<br>ASESALL<br>K                        | 1,387.75 |
| ATP | 6006 | ATPase, Na+/K+ transporting, alpha 1 polypeptide | gi 115305284.gi 116003819.gi 122132194 | 112,627.60 | 100.00% | 25 | 44 | 68 | 0.72% | 26.20% | SPDFTNE 4.22<br>NPLETR                             | 1,519.70 |

|     |      |                                                                                                     |                                          |            |         |    |    |    |       |        |                                    |      |          |
|-----|------|-----------------------------------------------------------------------------------------------------|------------------------------------------|------------|---------|----|----|----|-------|--------|------------------------------------|------|----------|
| ATP | 6006 | ATPase, Na+/K+ transporting, alpha 1 polypeptide                                                    | gi 115305284,gi 116003819,gi 122132194   | 112,627.60 | 100.00% | 25 | 44 | 68 | 0.72% | 26.20% | VDNSSL<br>TGESEP<br>QTR            | 3.62 | 1,619.75 |
| ATP | 6006 | ATPase, Na+/K+ transporting, alpha 1 polypeptide                                                    | gi 115305284,gi 116003819,gi 122132194   | 112,627.60 | 100.00% | 25 | 44 | 68 | 0.72% | 26.20% | VIMVTG<br>DHPITAK                  | 4.6  | 1,397.75 |
| ATP | 6006 | PREDICTED: similar to C4b-binding protein alpha chain precursor (C4bp) (Proline-rich protein) (PRP) | gi 76677514                              | 21,762.00  | 100.00% | 3  | 4  | 4  | 0.04% | 15.40% | DQYVSP<br>ETVTVR                   | 3.09 | 1,393.70 |
| ATP | 6006 | PREDICTED: similar to C4b-binding protein alpha chain precursor (C4bp) (Proline-rich protein) (PRP) | gi 76677514                              | 21,762.00  | 100.00% | 3  | 4  | 4  | 0.04% | 15.40% | LSLEIEK<br>LEQEKR                  | 1.78 | 1,614.91 |
| ATP | 6006 | PREDICTED: similar to C4b-binding protein alpha chain precursor (C4bp) (Proline-rich protein) (PRP) | gi 76677514                              | 21,762.00  | 100.00% | 3  | 4  | 4  | 0.04% | 15.40% | LSVEKD<br>QYVSPE<br>TVTTR          | 3.69 | 1,950.02 |
| ATP | 6006 | COL18A1 protein                                                                                     | gi 133778103,gi 134085613,gi 157742960   | 135,049.70 | 100.00% | 2  | 2  | 2  | 0.02% | 2.33%  | LFVAQA<br>GGADPE<br>KFQGLIS<br>ELR | 4.49 | 2,346.25 |
| ATP | 6006 | COL18A1 protein                                                                                     | gi 133778103,gi 134085613,gi 157742960   | 135,049.70 | 100.00% | 2  | 2  | 2  | 0.02% | 2.33%  | LQDLYSI<br>VR                      | 3.18 | 1,106.62 |
| ATP | 6006 | NADH dehydrogenase                                                                                  | gi 256,gi 28461255,gi 400533,gi 73587329 | 20,946.90  | 100.00% | 3  | 3  | 3  | 0.03% | 25.60% | AFDLLV<br>DRPVTL<br>VR             | 2.38 | 1,613.94 |

|     |      |                              |                                                                                                                                      |           |         |   |    |    |       |        |                                |          |
|-----|------|------------------------------|--------------------------------------------------------------------------------------------------------------------------------------|-----------|---------|---|----|----|-------|--------|--------------------------------|----------|
| ATP | 6006 | NADH dehydrogenase           | gi 256,gi 461255,gi 00533,gi 587329                                                                                                  | 20,946.90 | 100.00% | 3 | 3  | 3  | 0.03% | 25.60% | AYQDRY 3.01<br>HDLGAH<br>YSAR  | 1,922.89 |
| ATP | 6006 | NADH dehydrogenase           | gi 256,gi 461255,gi 00533,gi 587329                                                                                                  | 20,946.90 | 100.00% | 3 | 3  | 3  | 0.03% | 25.60% | DYKVDQ 3.02<br>EIVNIIQE<br>R   | 1,861.97 |
| ATP | 6006 | ribosomal protein L18        | gi 5985845,gi 9,gi 627520,gi 12,gi 75060,gi 915,gi 7577,gi 5560,gi 73893                                                             | 21,518.10 | 99.80%  | 2 | 3  | 3  | 0.03% | 11.20% | TNRPPLS 3.27<br>LSR            | 1,140.65 |
| ATP | 6006 | ribosomal protein L18        | gi 5985845,gi 9,gi 627520,gi 12,gi 75060,gi 915,gi 7577,gi 5560,gi 73893                                                             | 21,518.10 | 99.80%  | 2 | 3  | 3  | 0.03% | 11.20% | TNSTFN 2.84<br>QVVVK           | 1,250.67 |
| ATP | 6006 | endothelin-converting enzyme | gi 1092971,gi 1248291,gi 88,gi 19035,gi 9620,gi 229,gi 9388,gi 229,gi 9395,gi 307,gi 94312,gi 53,gi 5075,gi 688,gi 290,gi 8976,gi 02 | 85,603.70 | 100.00% | 7 | 10 | 13 | 0.14% | 13.30% | AFEESLS 2.44<br>TLK            | 1,124.58 |
| ATP | 6006 | endothelin-converting enzyme | gi 1092971,gi 1248291,gi 88,gi 19035,gi 9620,gi 229,gi 9388,gi 229,gi 9395,gi 307,gi 94312,gi 53,gi 5075,gi 688,gi 290,gi 8976,gi 02 | 85,603.70 | 100.00% | 7 | 10 | 13 | 0.14% | 13.30% | HTLGENI 4.14<br>ADNGGL<br>K    | 1,438.73 |
| ATP | 6006 | endothelin-converting enzyme | gi 1092971,gi 1248291,gi 88,gi 19035,gi 9620,gi 229,gi 9388,gi 229,gi 9395,gi 307,gi 94312,gi 53,gi 5075,gi 688,gi 290,gi 8976,gi 02 | 85,603.70 | 100.00% | 7 | 10 | 13 | 0.14% | 13.30% | NEIVFPA 3.88<br>GILQAPF<br>YTR | 1,936.03 |
| ATP | 6006 | endothelin-converting enzyme | gi 1092971,gi 1248291,gi 88,gi 19035,gi 9620,gi 229,gi 9388,gi 229,gi 9395,gi 307,gi 94312,gi 53,gi 5075,gi 688,gi 290,gi 8976,gi 02 | 85,603.70 | 100.00% | 7 | 10 | 13 | 0.14% | 13.30% | RRDEELI 2.28<br>YHK            | 1,358.72 |
| ATP | 6006 | endothelin-converting enzyme | gi 1092971,gi 1248291,gi 88,gi 19035,gi 9620,gi 229,gi 9388,gi 229,gi 9395,gi 307,gi 94312,gi 53,gi 5075,gi 688,gi 290,gi 8976,gi 02 | 85,603.70 | 100.00% | 7 | 10 | 13 | 0.14% | 13.30% | TPESHE 4.07<br>GLITDPH<br>SPSR | 1,946.92 |

|     |      |                                                                          |                                                                                                            |            |         |   |    |    |       |        |                                                        |      |          |
|-----|------|--------------------------------------------------------------------------|------------------------------------------------------------------------------------------------------------|------------|---------|---|----|----|-------|--------|--------------------------------------------------------|------|----------|
| ATP | 6006 | endothelin-convertinogen enzyme                                          | gi 1092971, gi 1248291, gi 190359620, gi 2299388, gi 2299395, gi 30794312, gi 535075, gi 688290, gi 897602 | 85,603.70  | 100.00% | 7 | 10 | 13 | 0.14% | 13.30% | VFNDYT<br>AVPDLY<br>FENAMR                             | 3.47 | 2,181.00 |
| ATP | 6006 | endothelin-convertinogen enzyme                                          | gi 1092971, gi 1248291, gi 190359620, gi 2299388, gi 2299395, gi 30794312, gi 535075, gi 688290, gi 897602 | 85,603.70  | 100.00% | 7 | 10 | 13 | 0.14% | 13.30% | VLTYGL<br>NYMVQL<br>GK                                 | 2.85 | 1,614.86 |
| ATP | 6006 | secretory carrier membrane protein 3 isoform 1                           | gi 61553277, gi 71649517, gi 73586519, gi 78369651                                                         | 38,260.60  | 99.80%  | 2 | 3  | 3  | 0.03% | 9.80%  | AQQEFA<br>AGVFSN<br>PAVR                               | 3.92 | 1,691.85 |
| ATP | 6006 | secretory carrier membrane protein 3 isoform 1                           | gi 61553277, gi 71649517, gi 73586519, gi 78369651                                                         | 38,260.60  | 99.80%  | 2 | 3  | 3  | 0.03% | 9.80%  | TAAANA<br>AAGAAE<br>NAFRAP                             | 2.71 | 1,644.81 |
| ATP | 6006 | anchor attachment protein 1                                              | gi 61555046, gi 66792846, gi 74267686                                                                      | 67,439.00  | 99.80%  | 2 | 2  | 2  | 0.02% | 3.89%  | KLFPDE<br>THER                                         | 2.97 | 1,368.69 |
| ATP | 6006 | anchor attachment protein 1                                              | gi 61555046, gi 66792846, gi 74267686                                                                      | 67,439.00  | 99.80%  | 2 | 2  | 2  | 0.02% | 3.89%  | SVGLEV<br>YTQSFS<br>R                                  | 3.84 | 1,472.74 |
| ATP | 6006 | PRKCD BP protein                                                         | gi 133778193, gi 134085797, gi 187611336                                                                   | 27,468.60  | 100.00% | 4 | 5  | 5  | 0.05% | 14.20% | GHAAPT<br>PTPVKPP<br>R                                 | 2.73 | 1,425.80 |
| ATP | 6006 | PRKCD BP protein                                                         | gi 133778193, gi 134085797, gi 187611336                                                                   | 27,468.60  | 100.00% | 4 | 5  | 5  | 0.05% | 14.20% | KGHAAP<br>TPTPVKPP<br>PR                               | 1.93 | 1,553.89 |
| ATP | 6006 | PRKCD BP protein                                                         | gi 133778193, gi 134085797, gi 187611336                                                                   | 27,468.60  | 100.00% | 4 | 5  | 5  | 0.05% | 14.20% | LEANHG<br>LLVAR                                        | 3.37 | 1,192.68 |
| ATP | 6006 | PRKCD BP protein                                                         | gi 133778193, gi 134085797, gi 187611336                                                                   | 27,468.60  | 100.00% | 4 | 5  | 5  | 0.05% | 14.20% | RIQSNLG<br>ALSR                                        | 3.08 | 1,214.70 |
| ATP | 6006 | PREDICTED: similar to Thrombospondin type-1 domain-containing protein 7A | gi 194665998                                                                                               | 183,582.80 | 99.80%  | 2 | 2  | 2  | 0.02% | 2.91%  | GNQTAL<br>CGGGVQ<br>TREAAC<br>VQANEN<br>LLSLNT<br>HKDK | 2.94 | 3,632.75 |

|     |      |                                                                           |            |            |         |    |    |    |       |        |                         |      |          |
|-----|------|---------------------------------------------------------------------------|------------|------------|---------|----|----|----|-------|--------|-------------------------|------|----------|
| ATP | 6006 | PREDIC TED: similar to Thrombospondin type-1 domain-containing protein 7A | gi 1946659 | 183,582.80 | 99.80%  | 2  | 2  | 2  | 0.02% | 2.91%  | LKPLTL AYDGDA DM        | 4.64 | 1,538.74 |
| ATP | 6006 | SCAMP2 protein                                                            | gi 1515547 | 36,685.40  | 99.80%  | 2  | 2  | 2  | 0.02% | 9.76%  | ELQNTV ANLHVR           | 2.24 | 1,393.75 |
| ATP | 6006 | SCAMP2 protein                                                            | gi 1515547 | 36,685.40  | 99.80%  | 2  | 2  | 2  | 0.02% | 9.76%  | TGASFQ QAQEEF SQGIFSS R | 2.54 | 2,205.02 |
| ATP | 6006 | PREDIC TED: similar to Histone H4 replacement                             | gi 1199157 | 11,349.70  | 100.00% | 14 | 26 | 95 | 1.00% | 62.10% | DNIQGIT KPAIR           | 4.08 | 1,325.75 |
| ATP | 6006 | PREDIC TED: similar to Histone H4 replacement                             | gi 1199157 | 11,349.70  | 100.00% | 14 | 26 | 95 | 1.00% | 62.10% | DNIQGIT KPAIRR          | 2.45 | 1,481.85 |
| ATP | 6006 | PREDIC TED: similar to Histone H4 replacement                             | gi 1199157 | 11,349.70  | 100.00% | 14 | 26 | 95 | 1.00% | 62.10% | ISGLIYE ETR             | 4.19 | 1,180.62 |
| ATP | 6006 | PREDIC TED: similar to Histone H4 replacement                             | gi 1199157 | 11,349.70  | 100.00% | 14 | 26 | 95 | 1.00% | 62.10% | ISGLIYE ETRGVL K        | 4.57 | 1,577.89 |
| ATP | 6006 | PREDIC TED: similar to Histone H4 replacement                             | gi 1199157 | 11,349.70  | 100.00% | 14 | 26 | 95 | 1.00% | 62.10% | KTVTAM DVVYAL K         | 4.56 | 1,454.79 |

|     |      |                                                           |                                                                                                             |           |         |    |    |    |       |        |                          |          |
|-----|------|-----------------------------------------------------------|-------------------------------------------------------------------------------------------------------------|-----------|---------|----|----|----|-------|--------|--------------------------|----------|
| ATP | 6006 | PREDIC TED: similar to Histone H4 replacem ent CG3379- PC | gi 1199157 09,gi 11991 5719,gi 119 915738,gi 7 6613952,gi  76616306,g i 76631252, gi 7663126 2,gi 766317 17 | 11,349.70 | 100.00% | 14 | 26 | 95 | 1.00% | 62.10% | KTVTAM 3.98 DVVYAL KR    | 1,610.89 |
| ATP | 6006 | PREDIC TED: similar to Histone H4 replacem ent CG3379- PC | gi 1199157 09,gi 11991 5719,gi 119 915738,gi 7 6613952,gi  76616306,g i 76631252, gi 7663126 2,gi 766317 17 | 11,349.70 | 100.00% | 14 | 26 | 95 | 1.00% | 62.10% | RISGLIY 3.31 EETRGV LK   | 1,733.99 |
| ATP | 6006 | PREDIC TED: similar to Histone H4 replacem ent CG3379- PC | gi 1199157 09,gi 11991 5719,gi 119 915738,gi 7 6613952,gi  76616306,g i 76631252, gi 7663126 2,gi 766317 17 | 11,349.70 | 100.00% | 14 | 26 | 95 | 1.00% | 62.10% | RKTVTA 3.96 MDVVY ALK    | 1,610.89 |
| ATP | 6006 | PREDIC TED: similar to Histone H4 replacem ent CG3379- PC | gi 1199157 09,gi 11991 5719,gi 119 915738,gi 7 6613952,gi  76616306,g i 76631252, gi 7663126 2,gi 766317 17 | 11,349.70 | 100.00% | 14 | 26 | 95 | 1.00% | 62.10% | TVTAMD 4.08 VVYALK       | 1,326.70 |
| ATP | 6006 | PREDIC TED: similar to Histone H4 replacem ent CG3379- PC | gi 1199157 09,gi 11991 5719,gi 119 915738,gi 7 6613952,gi  76616306,g i 76631252, gi 7663126 2,gi 766317 17 | 11,349.70 | 100.00% | 14 | 26 | 95 | 1.00% | 62.10% | TVTAMD 3.25 VVYALK R     | 1,482.80 |
| ATP | 6006 | PREDIC TED: similar to Histone H4 replacem ent CG3379- PC | gi 1199157 09,gi 11991 5719,gi 119 915738,gi 7 6613952,gi  76616306,g i 76631252, gi 7663126 2,gi 766317 17 | 11,349.70 | 100.00% | 14 | 26 | 95 | 1.00% | 62.10% | VFLENVI 3.72 R           | 989.5778 |
| ATP | 6006 | PREDIC TED: similar to Histone H4 replacem ent CG3379- PC | gi 1199157 09,gi 11991 5719,gi 119 915738,gi 7 6613952,gi  76616306,g i 76631252, gi 7663126 2,gi 766317 17 | 11,349.70 | 100.00% | 14 | 26 | 95 | 1.00% | 62.10% | VFLENVI 5.34 RDAVY TEHAK | 2,105.10 |



|     |      |                                                                     |                                                                                                                                                                                                                                                                                                                                                                                                                                                                                                                                                                                                                                                                                                                                                                                                                                                                                                                                                                                                                                                                                                                                                                                                                                                                                                                                                                                                                                                                                                                                                                                                                                                                                                                                                                                                                                                                                                                                                                                                                                                                                                                                                                                                                                                                                                                                                                                                                                                                                                                                                                                                                                                                                                                                                                                                                                                                                                                                                                                                                                                                                                                                                                                                                                                                                                                                                                                                                                                                                                                                                                                                                                                                                                                                                                                                                                                                                                                                                                                                                                                                                                                                                        |           |         |    |    |    |       |        |                                  |          |
|-----|------|---------------------------------------------------------------------|--------------------------------------------------------------------------------------------------------------------------------------------------------------------------------------------------------------------------------------------------------------------------------------------------------------------------------------------------------------------------------------------------------------------------------------------------------------------------------------------------------------------------------------------------------------------------------------------------------------------------------------------------------------------------------------------------------------------------------------------------------------------------------------------------------------------------------------------------------------------------------------------------------------------------------------------------------------------------------------------------------------------------------------------------------------------------------------------------------------------------------------------------------------------------------------------------------------------------------------------------------------------------------------------------------------------------------------------------------------------------------------------------------------------------------------------------------------------------------------------------------------------------------------------------------------------------------------------------------------------------------------------------------------------------------------------------------------------------------------------------------------------------------------------------------------------------------------------------------------------------------------------------------------------------------------------------------------------------------------------------------------------------------------------------------------------------------------------------------------------------------------------------------------------------------------------------------------------------------------------------------------------------------------------------------------------------------------------------------------------------------------------------------------------------------------------------------------------------------------------------------------------------------------------------------------------------------------------------------------------------------------------------------------------------------------------------------------------------------------------------------------------------------------------------------------------------------------------------------------------------------------------------------------------------------------------------------------------------------------------------------------------------------------------------------------------------------------------------------------------------------------------------------------------------------------------------------------------------------------------------------------------------------------------------------------------------------------------------------------------------------------------------------------------------------------------------------------------------------------------------------------------------------------------------------------------------------------------------------------------------------------------------------------------------------------------------------------------------------------------------------------------------------------------------------------------------------------------------------------------------------------------------------------------------------------------------------------------------------------------------------------------------------------------------------------------------------------------------------------------------------------------------------|-----------|---------|----|----|----|-------|--------|----------------------------------|----------|
| ATP | 6006 | PREDIC TED: similar to Histone H4 replacement CG3379-PC             | gi 119915709,gi 119915719,gi 119915738,gi 119915752,gi 119915766,gi 119915780,gi 119915794,gi 119915808,gi 119915822,gi 119915836,gi 119915850,gi 119915864,gi 119915878,gi 119915892,gi 119915906,gi 119915920,gi 119915934,gi 119915948,gi 119915962,gi 119915976,gi 119915990,gi 119916004,gi 119916018,gi 119916032,gi 119916046,gi 119916060,gi 119916074,gi 119916088,gi 119916102,gi 119916116,gi 119916130,gi 119916144,gi 119916158,gi 119916172,gi 119916186,gi 119916200,gi 119916214,gi 119916228,gi 119916242,gi 119916256,gi 119916270,gi 119916284,gi 119916298,gi 119916312,gi 119916326,gi 119916340,gi 119916354,gi 119916368,gi 119916382,gi 119916396,gi 119916410,gi 119916424,gi 119916438,gi 119916452,gi 119916466,gi 119916480,gi 119916494,gi 119916508,gi 119916522,gi 119916536,gi 119916550,gi 119916564,gi 119916578,gi 119916592,gi 119916606,gi 119916620,gi 119916634,gi 119916648,gi 119916662,gi 119916676,gi 119916690,gi 119916704,gi 119916718,gi 119916732,gi 119916746,gi 119916760,gi 119916774,gi 119916788,gi 119916802,gi 119916816,gi 119916830,gi 119916844,gi 119916858,gi 119916872,gi 119916886,gi 119916900,gi 119916914,gi 119916928,gi 119916942,gi 119916956,gi 119916970,gi 119916984,gi 119916998,gi 119917012,gi 119917026,gi 119917040,gi 119917054,gi 119917068,gi 119917082,gi 119917096,gi 119917110,gi 119917124,gi 119917138,gi 119917152,gi 119917166,gi 119917180,gi 119917194,gi 119917208,gi 119917222,gi 119917236,gi 119917250,gi 119917264,gi 119917278,gi 119917292,gi 119917306,gi 119917320,gi 119917334,gi 119917348,gi 119917362,gi 119917376,gi 119917390,gi 119917404,gi 119917418,gi 119917432,gi 119917446,gi 119917460,gi 119917474,gi 119917488,gi 119917502,gi 119917516,gi 119917530,gi 119917544,gi 119917558,gi 119917572,gi 119917586,gi 119917600,gi 119917614,gi 119917628,gi 119917642,gi 119917656,gi 119917670,gi 119917684,gi 119917698,gi 119917712,gi 119917726,gi 119917740,gi 119917754,gi 119917768,gi 119917782,gi 119917796,gi 119917810,gi 119917824,gi 119917838,gi 119917852,gi 119917866,gi 119917880,gi 119917894,gi 119917908,gi 119917922,gi 119917936,gi 119917950,gi 119917964,gi 119917978,gi 119917992,gi 119918006,gi 119918020,gi 119918034,gi 119918048,gi 119918062,gi 119918076,gi 119918090,gi 119918104,gi 119918118,gi 119918132,gi 119918146,gi 119918160,gi 119918174,gi 119918188,gi 119918202,gi 119918216,gi 119918230,gi 119918244,gi 119918258,gi 119918272,gi 119918286,gi 119918300,gi 119918314,gi 119918328,gi 119918342,gi 119918356,gi 119918370,gi 119918384,gi 119918398,gi 119918412,gi 119918426,gi 119918440,gi 119918454,gi 119918468,gi 119918482,gi 119918496,gi 119918510,gi 119918524,gi 119918538,gi 119918552,gi 119918566,gi 119918580,gi 119918594,gi 119918608,gi 119918622,gi 119918636,gi 119918650,gi 119918664,gi 119918678,gi 119918692,gi 119918706,gi 119918720,gi 119918734,gi 119918748,gi 119918762,gi 119918776,gi 119918790,gi 119918804,gi 119918818,gi 119918832,gi 119918846,gi 119918860,gi 119918874,gi 119918888,gi 119918902,gi 119918916,gi 119918930,gi 119918944,gi 119918958,gi 119918972,gi 119918986,gi 119919000,gi 119919014,gi 119919028,gi 119919042,gi 119919056,gi 119919070,gi 119919084,gi 119919098,gi 119919112,gi 119919126,gi 119919140,gi 119919154,gi 119919168,gi 119919182,gi 119919196,gi 119919210,gi 119919224,gi 119919238,gi 119919252,gi 119919266,gi 119919280,gi 119919294,gi 119919308,gi 119919322,gi 119919336,gi 119919350,gi 119919364,gi 119919378,gi 119919392,gi 119919406,gi 119919420,gi 119919434,gi 119919448,gi 119919462,gi 119919476,gi 119919490,gi 119919504,gi 119919518,gi 119919532,gi 119919546,gi 119919560,gi 119919574,gi 119919588,gi 119919602,gi 119919616,gi 119919630,gi 119919644,gi 119919658,gi 119919672,gi 119919686,gi 119919700,gi 119919714,gi 119919728,gi 119919742,gi 119919756,gi 119919770,gi 119919784,gi 119919798,gi 119919812,gi 119919826,gi 119919840,gi 119919854,gi 119919868,gi 119919882,gi 119919896,gi 119919910,gi 119919924,gi 119919938,gi 119919952,gi 119919966,gi 119919980,gi 119920000 | 11,349.70 | 100.00% | 14 | 26 | 95 | 1.00% | 62.10% | VFLENVI 4.96<br>RDAVTY<br>TEHAKR | 2,261.20 |
| ATP | 6006 | PREDIC TED: similar to Histone H4 replacement CG3379-PC             | gi 119915709,gi 119915719,gi 119915738,gi 119915752,gi 119915766,gi 119915780,gi 119915794,gi 119915808,gi 119915822,gi 119915836,gi 119915850,gi 119915864,gi 119915878,gi 119915892,gi 119915906,gi 119915920,gi 119915934,gi 119915948,gi 119915962,gi 119915976,gi 119915990,gi 119916004,gi 119916018,gi 119916032,gi 119916046,gi 119916060,gi 119916074,gi 119916088,gi 119916102,gi 119916116,gi 119916130,gi 119916144,gi 119916158,gi 119916172,gi 119916186,gi 119916200,gi 119916214,gi 119916228,gi 119916242,gi 119916256,gi 119916270,gi 119916284,gi 119916298,gi 119916312,gi 119916326,gi 119916340,gi 119916354,gi 119916368,gi 119916382,gi 119916396,gi 119916410,gi 119916424,gi 119916438,gi 119916452,gi 119916466,gi 119916480,gi 119916494,gi 119916508,gi 119916522,gi 119916536,gi 119916550,gi 119916564,gi 119916578,gi 119916592,gi 119916606,gi 119916620,gi 119916634,gi 119916648,gi 119916662,gi 119916676,gi 119916690,gi 119916704,gi 119916718,gi 119916732,gi 119916746,gi 119916760,gi 119916774,gi 119916788,gi 119916802,gi 119916816,gi 119916830,gi 119916844,gi 119916858,gi 119916872,gi 119916886,gi 119916900,gi 119916914,gi 119916928,gi 119916942,gi 119916956,gi 119916970,gi 119916984,gi 119916998,gi 119917012,gi 119917026,gi 119917040,gi 119917054,gi 119917068,gi 119917082,gi 119917096,gi 119917110,gi 119917124,gi 119917138,gi 119917152,gi 119917166,gi 119917180,gi 119917194,gi 119917208,gi 119917222,gi 119917236,gi 119917250,gi 119917264,gi 119917278,gi 119917292,gi 119917306,gi 119917320,gi 119917334,gi 119917348,gi 119917362,gi 119917376,gi 119917390,gi 119917404,gi 119917418,gi 119917432,gi 119917446,gi 119917460,gi 119917474,gi 119917488,gi 119917502,gi 119917516,gi 119917530,gi 119917544,gi 119917558,gi 119917572,gi 119917586,gi 119917600,gi 119917614,gi 119917628,gi 119917642,gi 119917656,gi 119917670,gi 119917684,gi 119917698,gi 119917712,gi 119917726,gi 119917740,gi 119917754,gi 119917768,gi 119917782,gi 119917796,gi 119917810,gi 119917824,gi 119917838,gi 119917852,gi 119917866,gi 119917880,gi 119917894,gi 119917908,gi 119917922,gi 119917936,gi 119917950,gi 119917964,gi 119917978,gi 119917992,gi 119918006,gi 119918020,gi 119918034,gi 119918048,gi 119918062,gi 119918076,gi 119918090,gi 119918104,gi 119918118,gi 119918132,gi 119918146,gi 119918160,gi 119918174,gi 119918188,gi 119918202,gi 119918216,gi 119918230,gi 119918244,gi 119918258,gi 119918272,gi 119918286,gi 119918300,gi 119918314,gi 119918328,gi 119918342,gi 119918356,gi 119918370,gi 119918384,gi 119918398,gi 119918412,gi 119918426,gi 119918440,gi 119918454,gi 119918468,gi 119918482,gi 119918496,gi 119918510,gi 119918524,gi 119918538,gi 119918552,gi 119918566,gi 119918580,gi 119918594,gi 119918608,gi 119918622,gi 119918636,gi 119918650,gi 119918664,gi 119918678,gi 119918692,gi 119918706,gi 119918720,gi 119918734,gi 119918748,gi 119918762,gi 119918776,gi 119918790,gi 119918804,gi 119918818,gi 119918832,gi 119918846,gi 119918860,gi 119918874,gi 119918888,gi 119918902,gi 119918916,gi 119918930,gi 119918944,gi 119918958,gi 119918972,gi 119918986,gi 119919000                                                                                                                                                                                                                                                                                                                                                                                                                                                                                                                                                                                                                                                                                                                                                                                                                                                                                                                                                            | 11,349.70 | 100.00% | 14 | 26 | 95 | 1.00% | 62.10% | VLRDNI 4.31<br>QGITKPA<br>IR     | 1,694.01 |
| ATP | 6006 | RecName : Full=Cleft lip and palate transmembrane protein 1 homolog | gi 110278913,gi 114051439,gi 84708720                                                                                                                                                                                                                                                                                                                                                                                                                                                                                                                                                                                                                                                                                                                                                                                                                                                                                                                                                                                                                                                                                                                                                                                                                                                                                                                                                                                                                                                                                                                                                                                                                                                                                                                                                                                                                                                                                                                                                                                                                                                                                                                                                                                                                                                                                                                                                                                                                                                                                                                                                                                                                                                                                                                                                                                                                                                                                                                                                                                                                                                                                                                                                                                                                                                                                                                                                                                                                                                                                                                                                                                                                                                                                                                                                                                                                                                                                                                                                                                                                                                                                                                  | 75,864.60 | 99.80%  | 2  | 3  | 3  | 0.03% | 4.48%  | ALNTFID 4.01<br>DLFAFVI<br>K     | 1,726.94 |
| ATP | 6006 | RecName : Full=Cleft lip and palate transmembrane protein 1 homolog | gi 110278913,gi 114051439,gi 84708720                                                                                                                                                                                                                                                                                                                                                                                                                                                                                                                                                                                                                                                                                                                                                                                                                                                                                                                                                                                                                                                                                                                                                                                                                                                                                                                                                                                                                                                                                                                                                                                                                                                                                                                                                                                                                                                                                                                                                                                                                                                                                                                                                                                                                                                                                                                                                                                                                                                                                                                                                                                                                                                                                                                                                                                                                                                                                                                                                                                                                                                                                                                                                                                                                                                                                                                                                                                                                                                                                                                                                                                                                                                                                                                                                                                                                                                                                                                                                                                                                                                                                                                  | 75,864.60 | 99.80%  | 2  | 3  | 3  | 0.03% | 4.48%  | NLLTGE 3.25<br>TEADPE<br>MIK     | 1,676.81 |
| ATP | 6006 | inner membrane protein, mitochondrial                               | gi 152941206                                                                                                                                                                                                                                                                                                                                                                                                                                                                                                                                                                                                                                                                                                                                                                                                                                                                                                                                                                                                                                                                                                                                                                                                                                                                                                                                                                                                                                                                                                                                                                                                                                                                                                                                                                                                                                                                                                                                                                                                                                                                                                                                                                                                                                                                                                                                                                                                                                                                                                                                                                                                                                                                                                                                                                                                                                                                                                                                                                                                                                                                                                                                                                                                                                                                                                                                                                                                                                                                                                                                                                                                                                                                                                                                                                                                                                                                                                                                                                                                                                                                                                                                           | 83,035.60 | 100.00% | 8  | 10 | 12 | 0.13% | 16.60% | ALEHHR 2.86<br>SEIQAEQ<br>DR     | 1,818.88 |
| ATP | 6006 | inner membrane protein, mitochondrial                               | gi 152941206                                                                                                                                                                                                                                                                                                                                                                                                                                                                                                                                                                                                                                                                                                                                                                                                                                                                                                                                                                                                                                                                                                                                                                                                                                                                                                                                                                                                                                                                                                                                                                                                                                                                                                                                                                                                                                                                                                                                                                                                                                                                                                                                                                                                                                                                                                                                                                                                                                                                                                                                                                                                                                                                                                                                                                                                                                                                                                                                                                                                                                                                                                                                                                                                                                                                                                                                                                                                                                                                                                                                                                                                                                                                                                                                                                                                                                                                                                                                                                                                                                                                                                                                           | 83,035.60 | 100.00% | 8  | 10 | 12 | 0.13% | 16.60% | AVDEEA 2.55<br>DALLK             | 1,115.59 |
| ATP | 6006 | inner membrane protein, mitochondrial                               | gi 152941206                                                                                                                                                                                                                                                                                                                                                                                                                                                                                                                                                                                                                                                                                                                                                                                                                                                                                                                                                                                                                                                                                                                                                                                                                                                                                                                                                                                                                                                                                                                                                                                                                                                                                                                                                                                                                                                                                                                                                                                                                                                                                                                                                                                                                                                                                                                                                                                                                                                                                                                                                                                                                                                                                                                                                                                                                                                                                                                                                                                                                                                                                                                                                                                                                                                                                                                                                                                                                                                                                                                                                                                                                                                                                                                                                                                                                                                                                                                                                                                                                                                                                                                                           | 83,035.60 | 100.00% | 8  | 10 | 12 | 0.13% | 16.60% | LAQQEK 3.95<br>QEQVKI<br>ESLAK   | 1,970.09 |
| ATP | 6006 | inner membrane protein, mitochondrial                               | gi 152941206                                                                                                                                                                                                                                                                                                                                                                                                                                                                                                                                                                                                                                                                                                                                                                                                                                                                                                                                                                                                                                                                                                                                                                                                                                                                                                                                                                                                                                                                                                                                                                                                                                                                                                                                                                                                                                                                                                                                                                                                                                                                                                                                                                                                                                                                                                                                                                                                                                                                                                                                                                                                                                                                                                                                                                                                                                                                                                                                                                                                                                                                                                                                                                                                                                                                                                                                                                                                                                                                                                                                                                                                                                                                                                                                                                                                                                                                                                                                                                                                                                                                                                                                           | 83,035.60 | 100.00% | 8  | 10 | 12 | 0.13% | 16.60% | QHIALAL 4.2<br>EK                | 1,022.60 |
| ATP | 6006 | inner membrane protein, mitochondrial                               | gi 152941206                                                                                                                                                                                                                                                                                                                                                                                                                                                                                                                                                                                                                                                                                                                                                                                                                                                                                                                                                                                                                                                                                                                                                                                                                                                                                                                                                                                                                                                                                                                                                                                                                                                                                                                                                                                                                                                                                                                                                                                                                                                                                                                                                                                                                                                                                                                                                                                                                                                                                                                                                                                                                                                                                                                                                                                                                                                                                                                                                                                                                                                                                                                                                                                                                                                                                                                                                                                                                                                                                                                                                                                                                                                                                                                                                                                                                                                                                                                                                                                                                                                                                                                                           | 83,035.60 | 100.00% | 8  | 10 | 12 | 0.13% | 16.60% | SVIENAK 4.64<br>KEEVAG<br>AK     | 1,572.86 |
| ATP | 6006 | inner membrane protein, mitochondrial                               | gi 152941206                                                                                                                                                                                                                                                                                                                                                                                                                                                                                                                                                                                                                                                                                                                                                                                                                                                                                                                                                                                                                                                                                                                                                                                                                                                                                                                                                                                                                                                                                                                                                                                                                                                                                                                                                                                                                                                                                                                                                                                                                                                                                                                                                                                                                                                                                                                                                                                                                                                                                                                                                                                                                                                                                                                                                                                                                                                                                                                                                                                                                                                                                                                                                                                                                                                                                                                                                                                                                                                                                                                                                                                                                                                                                                                                                                                                                                                                                                                                                                                                                                                                                                                                           | 83,035.60 | 100.00% | 8  | 10 | 12 | 0.13% | 16.60% | TASADL 3.25<br>PTVPLGS<br>AVEAIR | 1,868.01 |

|     |      |                                                       |                                                             |           |         |   |    |    |       |        |                                                          |      |          |
|-----|------|-------------------------------------------------------|-------------------------------------------------------------|-----------|---------|---|----|----|-------|--------|----------------------------------------------------------|------|----------|
| ATP | 6006 | inner membrane protein, mitochondrial                 | gi 152941206                                                | 83,035.60 | 100.00% | 8 | 10 | 12 | 0.13% | 16.60% | TDHPET<br>GEGKPK<br>PATSEEA<br>SSTSVR                    | 3.61 | 2,598.23 |
| ATP | 6006 | inner membrane protein, mitochondrial                 | gi 152941206                                                | 83,035.60 | 100.00% | 8 | 10 | 12 | 0.13% | 16.60% | VVSQYH<br>ELVVQAR                                        | 4.6  | 1,527.83 |
| ATP | 6006 | Endoplasmic reticulum protein 29                      | gi 109658363,gi 115495555,gi 143811387                      | 28,789.90 | 99.80%  | 2 | 2  | 2  | 0.02% | 17.80% | GHGIYL<br>GMPGCL<br>PAYDTL<br>AGEFIRA<br>SGVEAR<br>QSLLK | 3.01 | 3,806.94 |
| ATP | 6006 | Endoplasmic reticulum protein 29                      | gi 109658363,gi 115495555,gi 143811387                      | 28,789.90 | 99.80%  | 2 | 2  | 2  | 0.02% | 17.80% | SLNILTA<br>FQK                                           | 3.33 | 1,134.65 |
| ATP | 6006 | ATAD1 protein                                         | gi 154426126,gi 76671592                                    | 41,750.40 | 99.80%  | 2 | 3  | 3  | 0.03% | 11.40% | EYVNST<br>SEESH<br>EDEIRPV<br>QQQDLHR                    | 2.5  | 3,140.42 |
| ATP | 6006 | ATAD1 protein                                         | gi 154426126,gi 76671592                                    | 41,750.40 | 99.80%  | 2 | 3  | 3  | 0.03% | 11.40% | LQPSIIFI<br>DEIDSFLR                                     | 4.1  | 1,906.03 |
| ATP | 6006 | PREDICTED: similar to CUB domain containing protein 1 | gi 194677155                                                | 93,109.80 | 100.00% | 3 | 3  | 3  | 0.03% | 4.31%  | AFMIIQE<br>QR                                            | 3.07 | 1,151.59 |
| ATP | 6006 | PREDICTED: similar to CUB domain containing protein 1 | gi 194677155                                                | 93,109.80 | 100.00% | 3 | 3  | 3  | 0.03% | 4.31%  | LSLALVP<br>AQK                                           | 2.69 | 1,039.65 |
| ATP | 6006 | PREDICTED: similar to CUB domain containing protein 1 | gi 194677155                                                | 93,109.80 | 100.00% | 3 | 3  | 3  | 0.03% | 4.31%  | STDTPLL<br>DAHEPT<br>EPGE                                | 2.59 | 1,808.82 |
| ATP | 6006 | Mitochondrial carrier homolog 2 (C. elegans)          | gi 151554706,gi 28603744,gi 59858227,gi 67461083,gi 7959093 | 33,276.60 | 100.00% | 3 | 5  | 5  | 0.05% | 13.50% | GLFTGL<br>TPR                                            | 2.61 | 961.5467 |
| ATP | 6006 | Mitochondrial carrier homolog 2 (C. elegans)          | gi 151554706,gi 28603744,gi 59858227,gi 67461083,gi 7959093 | 33,276.60 | 100.00% | 3 | 5  | 5  | 0.05% | 13.50% | SAATLIT<br>HPFHVIT<br>LR                                 | 3.24 | 1,777.01 |

|     |      |                                                         |                                                             |           |         |    |    |    |       |        |                                     |      |          |
|-----|------|---------------------------------------------------------|-------------------------------------------------------------|-----------|---------|----|----|----|-------|--------|-------------------------------------|------|----------|
| ATP | 6006 | Mitochondrial carrier homolog 2 (C. elegans)            | gi 151554706,gi 28603744,gi 59858227,gi 67461083,gi 7959093 | 33,276.60 | 100.00% | 3  | 5  | 5  | 0.05% | 13.50% | VLIQVG<br>YEPLAPT<br>VGR            | 3.72 | 1,711.97 |
| ATP | 6006 | PREDICTED: similar to cytoskeleton-associated protein 4 | gi 119892686                                                | 64,511.50 | 100.00% | 36 | 53 | 83 | 0.87% | 54.70% | AAALRP<br>EEDGAF<br>RPSEAFE<br>TLQK | 3.62 | 2,533.27 |
| ATP | 6006 | PREDICTED: similar to cytoskeleton-associated protein 4 | gi 119892686                                                | 64,511.50 | 100.00% | 36 | 53 | 83 | 0.87% | 54.70% | AEESAA<br>HLPEEIR                   | 3.31 | 1,451.71 |
| ATP | 6006 | PREDICTED: similar to cytoskeleton-associated protein 4 | gi 119892686                                                | 64,511.50 | 100.00% | 36 | 53 | 83 | 0.87% | 54.70% | AEESAA<br>HLPEEIR<br>R              | 3.14 | 1,607.81 |
| ATP | 6006 | PREDICTED: similar to cytoskeleton-associated protein 4 | gi 119892686                                                | 64,511.50 | 100.00% | 36 | 53 | 83 | 0.87% | 54.70% | AEESAA<br>HLPEEIR<br>RLEEEL<br>GQLK | 3.31 | 2,647.37 |
| ATP | 6006 | PREDICTED: similar to cytoskeleton-associated protein 4 | gi 119892686                                                | 64,511.50 | 100.00% | 36 | 53 | 83 | 0.87% | 54.70% | ALKEVV<br>KEIQTSV<br>K              | 4.09 | 1,571.94 |
| ATP | 6006 | PREDICTED: similar to cytoskeleton-associated protein 4 | gi 119892686                                                | 64,511.50 | 100.00% | 36 | 53 | 83 | 0.87% | 54.70% | ASVGQV<br>ESDLK                     | 3.56 | 1,132.58 |
| ATP | 6006 | PREDICTED: similar to cytoskeleton-associated protein 4 | gi 119892686                                                | 64,511.50 | 100.00% | 36 | 53 | 83 | 0.87% | 54.70% | ASVGQV<br>ESDLKM<br>LR              | 2.61 | 1,548.81 |
| ATP | 6006 | PREDICTED: similar to cytoskeleton-associated protein 4 | gi 119892686                                                | 64,511.50 | 100.00% | 36 | 53 | 83 | 0.87% | 54.70% | DLSDGIH<br>VVK                      | 2.71 | 1,082.58 |

|     |      |                                                                |            |           |         |    |    |    |       |        |                                  |      |          |
|-----|------|----------------------------------------------------------------|------------|-----------|---------|----|----|----|-------|--------|----------------------------------|------|----------|
| ATP | 6006 | PREDIC TED: 86<br>similar to cytoskeleton-associated protein 4 | gi 1198926 | 64,511.50 | 100.00% | 36 | 53 | 83 | 0.87% | 54.70% | EELGQG<br>LQGVEQ<br>K            | 3.7  | 1,414.72 |
| ATP | 6006 | PREDIC TED: 86<br>similar to cytoskeleton-associated protein 4 | gi 1198926 | 64,511.50 | 100.00% | 36 | 53 | 83 | 0.87% | 54.70% | ELVSLK<br>QEQR                   | 3.48 | 1,357.74 |
| ATP | 6006 | PREDIC TED: 86<br>similar to cytoskeleton-associated protein 4 | gi 1198926 | 64,511.50 | 100.00% | 36 | 53 | 83 | 0.87% | 54.70% | ERDFTSL<br>ENTVEE<br>R           | 4.56 | 1,724.81 |
| ATP | 6006 | PREDIC TED: 86<br>similar to cytoskeleton-associated protein 4 | gi 1198926 | 64,511.50 | 100.00% | 36 | 53 | 83 | 0.87% | 54.70% | ERDFTSL<br>ENTVEE<br>RLTELT<br>K | 4.26 | 2,410.21 |
| ATP | 6006 | PREDIC TED: 86<br>similar to cytoskeleton-associated protein 4 | gi 1198926 | 64,511.50 | 100.00% | 36 | 53 | 83 | 0.87% | 54.70% | FKEAAD<br>SEHHTL<br>QALTEK       | 4.7  | 2,055.01 |
| ATP | 6006 | PREDIC TED: 86<br>similar to cytoskeleton-associated protein 4 | gi 1198926 | 64,511.50 | 100.00% | 36 | 53 | 83 | 0.87% | 54.70% | GLGEAQ<br>LSLAGD<br>VDELK        | 3.8  | 1,714.89 |
| ATP | 6006 | PREDIC TED: 86<br>similar to cytoskeleton-associated protein 4 | gi 1198926 | 64,511.50 | 100.00% | 36 | 53 | 83 | 0.87% | 54.70% | GLGEAQ<br>LSLAGD<br>VDELKR       | 4.54 | 1,870.99 |
| ATP | 6006 | PREDIC TED: 86<br>similar to cytoskeleton-associated protein 4 | gi 1198926 | 64,511.50 | 100.00% | 36 | 53 | 83 | 0.87% | 54.70% | GLGEAQ<br>LSLAGD<br>VDELKR<br>R  | 1.99 | 2,027.09 |

|     |      |                                                                                  |                  |           |         |    |    |    |       |        |                                                     |      |          |
|-----|------|----------------------------------------------------------------------------------|------------------|-----------|---------|----|----|----|-------|--------|-----------------------------------------------------|------|----------|
| ATP | 6006 | PREDIC<br>TED:<br>similar to<br>cytoskele<br>ton-<br>associate<br>d protein<br>4 | gi 1198926<br>86 | 64,511.50 | 100.00% | 36 | 53 | 83 | 0.87% | 54.70% | GLLEDL<br>RNLDLR                                    | 1.98 | 1,428.74 |
| ATP | 6006 | PREDIC<br>TED:<br>similar to<br>cytoskele<br>ton-<br>associate<br>d protein<br>4 | gi 1198926<br>86 | 64,511.50 | 100.00% | 36 | 53 | 83 | 0.87% | 54.70% | GLLEDL<br>RNLDLR<br>LFVK                            | 3.08 | 1,916.06 |
| ATP | 6006 | PREDIC<br>TED:<br>similar to<br>cytoskele<br>ton-<br>associate<br>d protein<br>4 | gi 1198926<br>86 | 64,511.50 | 100.00% | 36 | 53 | 83 | 0.87% | 54.70% | ILRAEES<br>AAHLPE<br>EIR                            | 3.69 | 1,833.98 |
| ATP | 6006 | PREDIC<br>TED:<br>similar to<br>cytoskele<br>ton-<br>associate<br>d protein<br>4 | gi 1198926<br>86 | 64,511.50 | 100.00% | 36 | 53 | 83 | 0.87% | 54.70% | ILRAEES<br>AAHLPE<br>EIRR                           | 2.95 | 1,990.08 |
| ATP | 6006 | PREDIC<br>TED:<br>similar to<br>cytoskele<br>ton-<br>associate<br>d protein<br>4 | gi 1198926<br>86 | 64,511.50 | 100.00% | 36 | 53 | 83 | 0.87% | 54.70% | KPPAP<br>QQHPP<br>PAPHPQ<br>QQHPPQ<br>HPQNQA<br>HGK | 3.29 | 3,630.83 |
| ATP | 6006 | PREDIC<br>TED:<br>similar to<br>cytoskele<br>ton-<br>associate<br>d protein<br>4 | gi 1198926<br>86 | 64,511.50 | 100.00% | 36 | 53 | 83 | 0.87% | 54.70% | LEEELG<br>QLK                                       | 3    | 1,058.57 |
| ATP | 6006 | PREDIC<br>TED:<br>similar to<br>cytoskele<br>ton-<br>associate<br>d protein<br>4 | gi 1198926<br>86 | 64,511.50 | 100.00% | 36 | 53 | 83 | 0.87% | 54.70% | LQNEILK<br>DLSGDIH<br>VVK                           | 3.66 | 1,921.08 |
| ATP | 6006 | PREDIC<br>TED:<br>similar to<br>cytoskele<br>ton-<br>associate<br>d protein<br>4 | gi 1198926<br>86 | 64,511.50 | 100.00% | 36 | 53 | 83 | 0.87% | 54.70% | LQNEILK<br>DLSGDIH<br>VVKDAR                        | 3.59 | 2,263.24 |

|     |      |                                                                |            |           |         |    |    |    |       |        |                                                 |      |          |
|-----|------|----------------------------------------------------------------|------------|-----------|---------|----|----|----|-------|--------|-------------------------------------------------|------|----------|
| ATP | 6006 | PREDIC TED: 86<br>similar to cytoskeleton-associated protein 4 | gi 1198926 | 64,511.50 | 100.00% | 36 | 53 | 83 | 0.87% | 54.70% | LQSVED<br>GVQAAR                                | 3.86 | 1,272.65 |
| ATP | 6006 | PREDIC TED: 86<br>similar to cytoskeleton-associated protein 4 | gi 1198926 | 64,511.50 | 100.00% | 36 | 53 | 83 | 0.87% | 54.70% | QREELG<br>QGLQGV<br>EQK                         | 5.15 | 1,698.88 |
| ATP | 6006 | PREDIC TED: 86<br>similar to cytoskeleton-associated protein 4 | gi 1198926 | 64,511.50 | 100.00% | 36 | 53 | 83 | 0.87% | 54.70% | QREELG<br>QGLQGV<br>EQKVQS<br>LQATFG<br>TFESLVR | 4.04 | 3,462.80 |
| ATP | 6006 | PREDIC TED: 86<br>similar to cytoskeleton-associated protein 4 | gi 1198926 | 64,511.50 | 100.00% | 36 | 53 | 83 | 0.87% | 54.70% | RLEEL<br>GQLK                                   | 3.32 | 1,214.67 |
| ATP | 6006 | PREDIC TED: 86<br>similar to cytoskeleton-associated protein 4 | gi 1198926 | 64,511.50 | 100.00% | 36 | 53 | 83 | 0.87% | 54.70% | SINDNIAI<br>FTDVQK                              | 3.04 | 1,577.82 |
| ATP | 6006 | PREDIC TED: 86<br>similar to cytoskeleton-associated protein 4 | gi 1198926 | 64,511.50 | 100.00% | 36 | 53 | 83 | 0.87% | 54.70% | SINDNIAI<br>FTDVQK<br>R                         | 4.24 | 1,733.92 |
| ATP | 6006 | PREDIC TED: 86<br>similar to cytoskeleton-associated protein 4 | gi 1198926 | 64,511.50 | 100.00% | 36 | 53 | 83 | 0.87% | 54.70% | STIQTME<br>SDVYTE<br>VK                         | 3.3  | 1,746.81 |
| ATP | 6006 | PREDIC TED: 86<br>similar to cytoskeleton-associated protein 4 | gi 1198926 | 64,511.50 | 100.00% | 36 | 53 | 83 | 0.87% | 54.70% | STIQTME<br>SDVYTE<br>VKELVS<br>LKQEQQ<br>R      | 3.74 | 3,085.54 |

|     |      |                                                       |                                     |           |         |    |    |    |       |        |                                                    |          |
|-----|------|-------------------------------------------------------|-------------------------------------|-----------|---------|----|----|----|-------|--------|----------------------------------------------------|----------|
| ATP | 6006 | PREDIC TED: similar to cytoskeletal protein 4         | gi 119892686                        | 64,511.50 | 100.00% | 36 | 53 | 83 | 0.87% | 54.70% | TAVDSL 2.73<br>VAYSVK                              | 1,252.68 |
| ATP | 6006 | PREDIC TED: similar to cytoskeletal protein 4         | gi 119892686                        | 64,511.50 | 100.00% | 36 | 53 | 83 | 0.87% | 54.70% | TAVDSL 4.2<br>VAYSVK<br>IETNENN<br>LESAK           | 2,595.31 |
| ATP | 6006 | PREDIC TED: similar to cytoskeletal protein 4         | gi 119892686                        | 64,511.50 | 100.00% | 36 | 53 | 83 | 0.87% | 54.70% | VQEQVH 3.45<br>TLLGR                               | 1,279.71 |
| ATP | 6006 | PREDIC TED: similar to cytoskeletal protein 4         | gi 119892686                        | 64,511.50 | 100.00% | 36 | 53 | 83 | 0.87% | 54.70% | VQSLQA 5.12<br>TFGTFES<br>LVR                      | 1,782.94 |
| ATP | 6006 | similar to peptidylprolyl isomerase A (cyclophilin A) | gi 28189771,gi 58760424,gi 75948300 | 17,851.80 | 99.80%  | 2  | 3  | 3  | 0.03% | 16.50% | SIYGEKF 2.51<br>DDENFIL<br>K                       | 1,817.90 |
| ATP | 6006 | similar to peptidylprolyl isomerase A (cyclophilin A) | gi 28189771,gi 58760424,gi 75948300 | 17,851.80 | 99.80%  | 2  | 3  | 3  | 0.03% | 16.50% | VSFELFA 3.36<br>DKVPK                              | 1,379.76 |
| ATP | 6006 | TMED7 protein                                         | gi 134025246,gi 157428116           | 25,318.00 | 100.00% | 3  | 3  | 3  | 0.03% | 18.20% | LEDPDG 2.35<br>NVLYK                               | 1,262.63 |
| ATP | 6006 | TMED7 protein                                         | gi 134025246,gi 157428116           | 25,318.00 | 100.00% | 3  | 3  | 3  | 0.03% | 18.20% | SVIDYQT 2.62<br>HFR                                | 1,265.63 |
| ATP | 6006 | TMED7 protein                                         | gi 134025246,gi 157428116           | 25,318.00 | 100.00% | 3  | 3  | 3  | 0.03% | 18.20% | TVYFDF 2.99<br>QVGEDP<br>PLFPSEN<br>R              | 2,357.11 |
| ATP | 6006 | Prohibitor                                            | gi 74354527,gi 77736091,gi 88909243 | 29,786.60 | 100.00% | 11 | 13 | 17 | 0.18% | 46.30% | AATFGLI 3.64<br>LDDVSL<br>THLTFG<br>KEFTEA<br>VEAK | 3,123.63 |
| ATP | 6006 | Prohibitor                                            | gi 74354527,gi 77736091,gi 88909243 | 29,786.60 | 100.00% | 11 | 13 | 17 | 0.18% | 46.30% | DLQNVN 4.04<br>ITLR                                | 1,185.66 |
| ATP | 6006 | Prohibitor                                            | gi 74354527,gi 77736091,gi 88909243 | 29,786.60 | 100.00% | 11 | 13 | 17 | 0.18% | 46.30% | FDAGELI 3.92<br>TQR                                | 1,149.59 |

|     |      |                                                                      |                                                                |           |         |    |    |    |       |        |                                     |      |          |
|-----|------|----------------------------------------------------------------------|----------------------------------------------------------------|-----------|---------|----|----|----|-------|--------|-------------------------------------|------|----------|
| ATP | 6006 | Prohibiti<br>n                                                       | gi 7435452<br>7,gi 777360<br>91,gi 88909<br>243                | 29,786.60 | 100.00% | 11 | 13 | 17 | 0.18% | 46.30% | IFTSIGE<br>DYDER                    | 3.57 | 1,444.66 |
| ATP | 6006 | Prohibiti<br>n                                                       | gi 7435452<br>7,gi 777360<br>91,gi 88909<br>243                | 29,786.60 | 100.00% | 11 | 13 | 17 | 0.18% | 46.30% | IFTSIGE<br>DYDERV<br>LPSITTEI<br>LK | 2.65 | 2,639.38 |
| ATP | 6006 | Prohibiti<br>n                                                       | gi 7435452<br>7,gi 777360<br>91,gi 88909<br>243                | 29,786.60 | 100.00% | 11 | 13 | 17 | 0.18% | 46.30% | ILFRPVA<br>SQLPR                    | 3.17 | 1,396.84 |
| ATP | 6006 | Prohibiti<br>n                                                       | gi 7435452<br>7,gi 777360<br>91,gi 88909<br>243                | 29,786.60 | 100.00% | 11 | 13 | 17 | 0.18% | 46.30% | KLEAAE<br>DIAYQLS<br>R              | 3.82 | 1,606.84 |
| ATP | 6006 | Prohibiti<br>n                                                       | gi 7435452<br>7,gi 777360<br>91,gi 88909<br>243                | 29,786.60 | 100.00% | 11 | 13 | 17 | 0.18% | 46.30% | NITYLPA<br>GQSVLL<br>QLPQ           | 4.19 | 1,855.03 |
| ATP | 6006 | Prohibiti<br>n                                                       | gi 7435452<br>7,gi 777360<br>91,gi 88909<br>243                | 29,786.60 | 100.00% | 11 | 13 | 17 | 0.18% | 46.30% | NVPVITG<br>SKDLQN<br>VNITLR         | 5.19 | 2,081.17 |
| ATP | 6006 | Prohibiti<br>n                                                       | gi 7435452<br>7,gi 777360<br>91,gi 88909<br>243                | 29,786.60 | 100.00% | 11 | 13 | 17 | 0.18% | 46.30% | SRNITYL<br>PAGQSV<br>LLQLPQ         | 4.09 | 2,098.17 |
| ATP | 6006 | Prohibiti<br>n                                                       | gi 7435452<br>7,gi 777360<br>91,gi 88909<br>243                | 29,786.60 | 100.00% | 11 | 13 | 17 | 0.18% | 46.30% | VLPSITT<br>EILK                     | 2.53 | 1,213.74 |
| ATP | 6006 | ras-<br>related<br>C3<br>botulinu<br>m toxin<br>substrate<br>1       | gi 2780644<br>3,gi 517027<br>85,gi 60070<br>14,gi 73587<br>375 | 21,432.60 | 100.00% | 3  | 4  | 5  | 0.05% | 14.10% | KLTPITY<br>PQGLAM<br>AK             | 2.94 | 1,647.91 |
| ATP | 6006 | ras-<br>related<br>C3<br>botulinu<br>m toxin<br>substrate<br>1       | gi 2780644<br>3,gi 517027<br>85,gi 60070<br>14,gi 73587<br>375 | 21,432.60 | 100.00% | 3  | 4  | 5  | 0.05% | 14.10% | LDLRDD<br>KDTIEK                    | 2.1  | 1,460.76 |
| ATP | 6006 | ras-<br>related<br>C3<br>botulinu<br>m toxin<br>substrate<br>1       | gi 2780644<br>3,gi 517027<br>85,gi 60070<br>14,gi 73587<br>375 | 21,432.60 | 100.00% | 3  | 4  | 5  | 0.05% | 14.10% | LTPITYP<br>QGLAMA<br>K              | 3.27 | 1,519.82 |
| ATP | 6006 | RecName<br>:<br>Full=Hist<br>one H1.1;<br>AltName:<br>Full=CT<br>L-1 | gi 121903                                                      | 10,347.40 | 100.00% | 3  | 4  | 4  | 0.04% | 27.90% | ALAAAG<br>YDVEKN<br>NSR             | 4.65 | 1,578.79 |



|     |      |                                                                                                      |           |         |   |   |   |       |        |                                      |          |
|-----|------|------------------------------------------------------------------------------------------------------|-----------|---------|---|---|---|-------|--------|--------------------------------------|----------|
| ATP | 6006 | RecName gi 121903 :<br>Full=Histone H1.1;<br>AltName: Full=CTL-1                                     | 10,347.40 | 100.00% | 3 | 4 | 4 | 0.04% | 27.90% | KALAAA 4.5<br>GYDVEK<br>NNSR         | 1,706.88 |
| ATP | 6006 | RecName gi 121903 :<br>Full=Histone H1.1;<br>AltName: Full=CTL-1                                     | 10,347.40 | 100.00% | 3 | 4 | 4 | 0.04% | 27.90% | KASGPP 3.24<br>VSELITK               | 1,326.76 |
| ATP | 6006 | GNAS complex locus gi 1139122 07,gi 74268 384                                                        | 45,691.40 | 100.00% | 5 | 5 | 5 | 0.05% | 19.80% | ILHVNGF 5.4<br>NGEGGE<br>EDPQAA<br>R | 2,110.00 |
| ATP | 6006 | GNAS complex locus gi 1139122 07,gi 74268 384                                                        | 45,691.40 | 100.00% | 5 | 5 | 5 | 0.05% | 19.80% | LLLLGA 3.7<br>GESGK                  | 1,057.63 |
| ATP | 6006 | GNAS complex locus gi 1139122 07,gi 74268 384                                                        | 45,691.40 | 100.00% | 5 | 5 | 5 | 0.05% | 19.80% | SKIEDYF 2.41<br>PEFAR                | 1,501.73 |
| ATP | 6006 | GNAS complex locus gi 1139122 07,gi 74268 384                                                        | 45,691.40 | 100.00% | 5 | 5 | 5 | 0.05% | 19.80% | VLTSGIF 2.54<br>ETK                  | 1,094.61 |
| ATP | 6006 | GNAS complex locus gi 1139122 07,gi 74268 384                                                        | 45,691.40 | 100.00% | 5 | 5 | 5 | 0.05% | 19.80% | YFIRDEF 1.5<br>LR                    | 1,258.66 |
| ATP | 6006 | GNAS complex locus gi 1139122 07,gi 74268 384                                                        | 45,691.40 | 100.00% | 5 | 5 | 5 | 0.05% | 19.80% | YTPPED 1.92<br>ATPEPG<br>EDPR        | 1,774.78 |
| ATP | 6006 | PREDICTED: gi 1946719 15<br>similar to Transmembrane 9 superfamily member 2 precursor (p76), partial | 72,962.00 | 100.00% | 2 | 4 | 4 | 0.04% | 4.40%  | IYYHVV 4.36<br>ETGSMG<br>AR          | 1,598.76 |
| ATP | 6006 | PREDICTED: gi 1946719 15<br>similar to Transmembrane 9 superfamily member 2 precursor (p76), partial | 72,962.00 | 100.00% | 2 | 4 | 4 | 0.04% | 4.40%  | RPSENL 4.74<br>GQVLFG<br>ER          | 1,601.84 |
| ATP | 6006 | interferon stimulated gene 17 [Ovis aries] gi 1208240 2,gi 576191 83                                 | 17,482.10 | 100.00% | 3 | 3 | 3 | 0.03% | 19.70% | EVLQEG 4<br>VPLVHQ<br>GLK            | 1,645.93 |

|     |      |                                                |                                                                   |            |         |    |    |    |       |        |                                |      |          |
|-----|------|------------------------------------------------|-------------------------------------------------------------------|------------|---------|----|----|----|-------|--------|--------------------------------|------|----------|
| ATP | 6006 | interferon stimulate d gene 17 83 [Ovis aries] | gi 1208240_2,gi 576191                                            | 17,482.10  | 100.00% | 3  | 3  | 3  | 0.03% | 19.70% | INVPAFQ QR                     | 2.54 | 1,072.59 |
| ATP | 6006 | interferon stimulate d gene 17 83 [Ovis aries] | gi 1208240_2,gi 576191                                            | 17,482.10  | 100.00% | 3  | 3  | 3  | 0.03% | 19.70% | LAHLDS REVLQE GVPLVH QGLK      | 2.78 | 2,438.35 |
| ATP | 6006 | RPL12 protein                                  | gi 1487441_91,gi 42564_206,gi 4543_0019,gi 471_17092,gi 74_354972 | 17,801.10  | 99.80%  | 2  | 2  | 2  | 0.02% | 18.80% | HSGNITF DEIVNIA R              | 3.23 | 1,685.86 |
| ATP | 6006 | RPL12 protein                                  | gi 1487441_91,gi 42564_206,gi 4543_0019,gi 471_17092,gi 74_354972 | 17,801.10  | 99.80%  | 2  | 2  | 2  | 0.02% | 18.80% | QAQIEV VPSASA LIK              | 3.41 | 1,666.97 |
| ATP | 6006 | RecName : Full=Cate nin alpha- 1               | gi 1141492_56,gi 75773_615,gi 7836_9272                           | 100,117.00 | 100.00% | 16 | 20 | 27 | 0.28% | 28.60% | AEVQNL GGELVV SGVDSA MSLIQA AK | 3.68 | 2,602.34 |
| ATP | 6006 | RecName : Full=Cate nin alpha- 1               | gi 1141492_56,gi 75773_615,gi 7836_9272                           | 100,117.00 | 100.00% | 16 | 20 | 27 | 0.28% | 28.60% | AHVLA A SVEQAT ENFLEK GDK      | 3.56 | 2,257.15 |
| ATP | 6006 | RecName : Full=Cate nin alpha- 1               | gi 1141492_56,gi 75773_615,gi 7836_9272                           | 100,117.00 | 100.00% | 16 | 20 | 27 | 0.28% | 28.60% | ALKPEV DKLNIM AAK              | 2.38 | 1,656.94 |
| ATP | 6006 | RecName : Full=Cate nin alpha- 1               | gi 1141492_56,gi 75773_615,gi 7836_9272                           | 100,117.00 | 100.00% | 16 | 20 | 27 | 0.28% | 28.60% | ESQFLKE ELVAAV EDVRK           | 2.2  | 2,090.11 |
| ATP | 6006 | RecName : Full=Cate nin alpha- 1               | gi 1141492_56,gi 75773_615,gi 7836_9272                           | 100,117.00 | 100.00% | 16 | 20 | 27 | 0.28% | 28.60% | GKGPLK NTSDVIS AAK             | 3.24 | 1,585.89 |
| ATP | 6006 | RecName : Full=Cate nin alpha- 1               | gi 1141492_56,gi 75773_615,gi 7836_9272                           | 100,117.00 | 100.00% | 16 | 20 | 27 | 0.28% | 28.60% | HVNPVQ ALSEFK AMDSI            | 2.91 | 1,901.94 |
| ATP | 6006 | RecName : Full=Cate nin alpha- 1               | gi 1141492_56,gi 75773_615,gi 7836_9272                           | 100,117.00 | 100.00% | 16 | 20 | 27 | 0.28% | 28.60% | IAEQVAS FQEEK                  | 3.71 | 1,378.68 |
| ATP | 6006 | RecName : Full=Cate nin alpha- 1               | gi 1141492_56,gi 75773_615,gi 7836_9272                           | 100,117.00 | 100.00% | 16 | 20 | 27 | 0.28% | 28.60% | LLILAD MADVY K                 | 3.27 | 1,380.74 |
| ATP | 6006 | RecName : Full=Cate nin alpha- 1               | gi 1141492_56,gi 75773_615,gi 7836_9272                           | 100,117.00 | 100.00% | 16 | 20 | 27 | 0.28% | 28.60% | NAGTEQ DLGIQY K                | 2.72 | 1,436.70 |

|     |      |                                                                                                                      |                                                     |         |    |    |    |       |        |                                         |          |
|-----|------|----------------------------------------------------------------------------------------------------------------------|-----------------------------------------------------|---------|----|----|----|-------|--------|-----------------------------------------|----------|
| ATP | 6006 | RecName gi 1141492 : 56,gi 75773 Full=Cate 615,gi 7836 nin alpha- 9272 1                                             | 100,117.00                                          | 100.00% | 16 | 20 | 27 | 0.28% | 28.60% | NLMNAV 2.92 VQTVK                       | 1,232.67 |
| ATP | 6006 | RecName gi 1141492 : 56,gi 75773 Full=Cate 615,gi 7836 nin alpha- 9272 1                                             | 100,117.00                                          | 100.00% | 16 | 20 | 27 | 0.28% | 28.60% | QALQDL 2.92 LSEYMG NAGRK                | 1,909.94 |
| ATP | 6006 | RecName gi 1141492 : 56,gi 75773 Full=Cate 615,gi 7836 nin alpha- 9272 1                                             | 100,117.00                                          | 100.00% | 16 | 20 | 27 | 0.28% | 28.60% | QIIVDPL 3.28 SFSEER                     | 1,532.80 |
| ATP | 6006 | RecName gi 1141492 : 56,gi 75773 Full=Cate 615,gi 7836 nin alpha- 9272 1                                             | 100,117.00                                          | 100.00% | 16 | 20 | 27 | 0.28% | 28.60% | TSVQTE 3.78 DDQLIA GQSAR                | 1,818.88 |
| ATP | 6006 | RecName gi 1141492 : 56,gi 75773 Full=Cate 615,gi 7836 nin alpha- 9272 1                                             | 100,117.00                                          | 100.00% | 16 | 20 | 27 | 0.28% | 28.60% | VIHVVTS 4.57 EMDNYE PGVYTE K            | 2,326.09 |
| ATP | 6006 | RecName gi 1141492 : 56,gi 75773 Full=Cate 615,gi 7836 nin alpha- 9272 1                                             | 100,117.00                                          | 100.00% | 16 | 20 | 27 | 0.28% | 28.60% | VKAEVQ 4.54 NLGGEL VVSGVD SAMSLIQ AAK   | 2,829.50 |
| ATP | 6006 | RecName gi 1141492 : 56,gi 75773 Full=Cate 615,gi 7836 nin alpha- 9272 1                                             | 100,117.00                                          | 100.00% | 16 | 20 | 27 | 0.28% | 28.60% | VLTDVAV 4.03 DDITSID DFLAVS ENHILED VNK | 3,200.58 |
| ATP | 6006 | RecName gi 1098952 : 13,gi 74354 Full=Tra 058,gi 7773 nsmembr 6477 ane and coiled-coil domain- containin g protein 1 | 21,158.30                                           | 99.80%  | 2  | 2  | 2  | 0.02% | 15.40% | LPFTPLS 3.77 YIQGLSH R                  | 1,728.94 |
| ATP | 6006 | RecName gi 1098952 : 13,gi 74354 Full=Tra 058,gi 7773 nsmembr 6477 ane and coiled-coil domain- containin g protein 1 | 21,158.30                                           | 99.80%  | 2  | 2  | 2  | 0.02% | 15.40% | QAGGFL 2.88 GPPPPSG K                   | 1,309.69 |
| ATP | 6006 | Heat shock 70kDa protein 5 (glucose-regulated protein, 78kDa)                                                        | gi 1113084 72,383.60 68,gi 11549 5027,gi 152 941210 | 100.00% | 20 | 31 | 37 | 0.39% | 33.40% | AKFEEL 4.89 NMDLFR                      | 1,528.75 |

|     |      |                                                               |                                           |           |         |    |    |    |       |        |                           |      |          |
|-----|------|---------------------------------------------------------------|-------------------------------------------|-----------|---------|----|----|----|-------|--------|---------------------------|------|----------|
| ATP | 6006 | Heat shock 70kDa protein 5 (glucose-regulated protein, 78kDa) | gi 1113084.68.gi 11549.5027.gi 152.941210 | 72,383.60 | 100.00% | 20 | 31 | 37 | 0.39% | 33.40% | DAGTIA<br>GLNVMR          | 3.25 | 1,233.63 |
| ATP | 6006 | Heat shock 70kDa protein 5 (glucose-regulated protein, 78kDa) | gi 1113084.68.gi 11549.5027.gi 152.941210 | 72,383.60 | 100.00% | 20 | 31 | 37 | 0.39% | 33.40% | ELEEIVQ<br>PIISK          | 3.42 | 1,397.79 |
| ATP | 6006 | Heat shock 70kDa protein 5 (glucose-regulated protein, 78kDa) | gi 1113084.68.gi 11549.5027.gi 152.941210 | 72,383.60 | 100.00% | 20 | 31 | 37 | 0.39% | 33.40% | FEELNM<br>DLFR            | 3.11 | 1,329.61 |
| ATP | 6006 | Heat shock 70kDa protein 5 (glucose-regulated protein, 78kDa) | gi 1113084.68.gi 11549.5027.gi 152.941210 | 72,383.60 | 100.00% | 20 | 31 | 37 | 0.39% | 33.40% | IDTRNEL<br>ESYAYS<br>LK   | 4.24 | 1,801.90 |
| ATP | 6006 | Heat shock 70kDa protein 5 (glucose-regulated protein, 78kDa) | gi 1113084.68.gi 11549.5027.gi 152.941210 | 72,383.60 | 100.00% | 20 | 31 | 37 | 0.39% | 33.40% | IINEPTA<br>AAIAYG<br>LDK  | 4.01 | 1,659.90 |
| ATP | 6006 | Heat shock 70kDa protein 5 (glucose-regulated protein, 78kDa) | gi 1113084.68.gi 11549.5027.gi 152.941210 | 72,383.60 | 100.00% | 20 | 31 | 37 | 0.39% | 33.40% | IINEPTA<br>AAIAYG<br>LDKR | 3.83 | 1,816.00 |
| ATP | 6006 | Heat shock 70kDa protein 5 (glucose-regulated protein, 78kDa) | gi 1113084.68.gi 11549.5027.gi 152.941210 | 72,383.60 | 100.00% | 20 | 31 | 37 | 0.39% | 33.40% | ITITNDQ<br>NRLTPE<br>EIER | 3.51 | 2,042.05 |
| ATP | 6006 | Heat shock 70kDa protein 5 (glucose-regulated protein, 78kDa) | gi 1113084.68.gi 11549.5027.gi 152.941210 | 72,383.60 | 100.00% | 20 | 31 | 37 | 0.39% | 33.40% | ITPSYVA<br>FTPEGER        | 3.18 | 1,566.78 |

|     |      |                                                               |                                           |           |         |    |    |    |       |        |                      |      |          |
|-----|------|---------------------------------------------------------------|-------------------------------------------|-----------|---------|----|----|----|-------|--------|----------------------|------|----------|
| ATP | 6006 | Heat shock 70kDa protein 5 (glucose-regulated protein, 78kDa) | gi 1113084.68.gi 11549.5027.gi 152.941210 | 72,383.60 | 100.00% | 20 | 31 | 37 | 0.39% | 33.40% | KKELEEI VQPIISK      | 3.81 | 1,653.98 |
| ATP | 6006 | Heat shock 70kDa protein 5 (glucose-regulated protein, 78kDa) | gi 1113084.68.gi 11549.5027.gi 152.941210 | 72,383.60 | 100.00% | 20 | 31 | 37 | 0.39% | 33.40% | KSQIFST ASDNQP TVTIK | 3.48 | 1,965.03 |
| ATP | 6006 | Heat shock 70kDa protein 5 (glucose-regulated protein, 78kDa) | gi 1113084.68.gi 11549.5027.gi 152.941210 | 72,383.60 | 100.00% | 20 | 31 | 37 | 0.39% | 33.40% | KVTHAV VTVPAY FNDAQR | 3.39 | 2,016.07 |
| ATP | 6006 | Heat shock 70kDa protein 5 (glucose-regulated protein, 78kDa) | gi 1113084.68.gi 11549.5027.gi 152.941210 | 72,383.60 | 100.00% | 20 | 31 | 37 | 0.39% | 33.40% | MVNDAAE KFAEED KK    | 3    | 1,669.77 |
| ATP | 6006 | Heat shock 70kDa protein 5 (glucose-regulated protein, 78kDa) | gi 1113084.68.gi 11549.5027.gi 152.941210 | 72,383.60 | 100.00% | 20 | 31 | 37 | 0.39% | 33.40% | NQLTSN PENTVF DAK    | 3.36 | 1,677.81 |
| ATP | 6006 | Heat shock 70kDa protein 5 (glucose-regulated protein, 78kDa) | gi 1113084.68.gi 11549.5027.gi 152.941210 | 72,383.60 | 100.00% | 20 | 31 | 37 | 0.39% | 33.40% | NQLTSN PENTVF DAKR   | 3.73 | 1,833.91 |
| ATP | 6006 | Heat shock 70kDa protein 5 (glucose-regulated protein, 78kDa) | gi 1113084.68.gi 11549.5027.gi 152.941210 | 72,383.60 | 100.00% | 20 | 31 | 37 | 0.39% | 33.40% | SQIFSTA SDNQPT VTIK  | 3.34 | 1,836.93 |
| ATP | 6006 | Heat shock 70kDa protein 5 (glucose-regulated protein, 78kDa) | gi 1113084.68.gi 11549.5027.gi 152.941210 | 72,383.60 | 100.00% | 20 | 31 | 37 | 0.39% | 33.40% | TFAPEEI SAMVLT K     | 4.15 | 1,552.79 |

|     |      |                                                               |                                                                                                             |           |         |    |    |    |       |        |                                          |          |
|-----|------|---------------------------------------------------------------|-------------------------------------------------------------------------------------------------------------|-----------|---------|----|----|----|-------|--------|------------------------------------------|----------|
| ATP | 6006 | Heat shock 70kDa protein 5 (glucose-regulated protein, 78kDa) | gi 1113084.68.gi 11549.5027.gi 152.941210                                                                   | 72,383.60 | 100.00% | 20 | 31 | 37 | 0.39% | 33.40% | TKPYIQV 4.17<br>DVGGGQ<br>TK             | 1,590.85 |
| ATP | 6006 | Heat shock 70kDa protein 5 (glucose-regulated protein, 78kDa) | gi 1113084.68.gi 11549.5027.gi 152.941210                                                                   | 72,383.60 | 100.00% | 20 | 31 | 37 | 0.39% | 33.40% | VLEDSD 5.91<br>LKKSDID<br>EIVLVG<br>GSTR | 2,488.31 |
| ATP | 6006 | Heat shock 70kDa protein 5 (glucose-regulated protein, 78kDa) | gi 1113084.68.gi 11549.5027.gi 152.941210                                                                   | 72,383.60 | 100.00% | 20 | 31 | 37 | 0.39% | 33.40% | VTHAVV 3.49<br>TVPAYF<br>NDAQR           | 1,887.97 |
| ATP | 6006 | Junction plakoglobin in                                       | gi 1096581.66.gi 15739.1363.gi 158.065994.gi 2.0336613.gi 211637709.gi 2181030.15.gi 51316.492.gi 5159.1897 | 81,804.10 | 100.00% | 6  | 7  | 7  | 0.07% | 12.10% | LNTIPLF 4.35<br>VQLLYS<br>SVENIQR        | 2,347.30 |
| ATP | 6006 | Junction plakoglobin in                                       | gi 1096581.66.gi 15739.1363.gi 158.065994.gi 2.0336613.gi 211637709.gi 2181030.15.gi 51316.492.gi 5159.1897 | 81,804.10 | 100.00% | 6  | 7  | 7  | 0.07% | 12.10% | LNYGIPA 2.32<br>IVK                      | 1,087.65 |
| ATP | 6006 | Junction plakoglobin in                                       | gi 1096581.66.gi 15739.1363.gi 158.065994.gi 2.0336613.gi 211637709.gi 2181030.15.gi 51316.492.gi 5159.1897 | 81,804.10 | 100.00% | 6  | 7  | 7  | 0.07% | 12.10% | LVQLLV 2.37<br>K                         | 812.5605 |
| ATP | 6006 | Junction plakoglobin in                                       | gi 1096581.66.gi 15739.1363.gi 158.065994.gi 2.0336613.gi 211637709.gi 2181030.15.gi 51316.492.gi 5159.1897 | 81,804.10 | 100.00% | 6  | 7  | 7  | 0.07% | 12.10% | NLSDVA 2.49<br>TKQEGL<br>ESVLK           | 1,830.98 |

|     |      |                                                 |                                                                                                                                          |           |         |   |   |   |       |        |                                                                      |          |
|-----|------|-------------------------------------------------|------------------------------------------------------------------------------------------------------------------------------------------|-----------|---------|---|---|---|-------|--------|----------------------------------------------------------------------|----------|
| ATP | 6006 | Junction<br>plakoglob<br>in                     | gi 1096581<br>66,gi 15739<br>1363,gi 158<br>065994,gi 2<br>0336613,gi <br>211637709,<br>gi 2181030<br>15,gi 51316<br>492,gi 5159<br>1897 | 81,804.10 | 100.00% | 6 | 7 | 7 | 0.07% | 12.10% | SAIVHLI 3.03<br>NYQDDA<br>ELATR                                      | 2,029.04 |
| ATP | 6006 | Junction<br>plakoglob<br>in                     | gi 1096581<br>66,gi 15739<br>1363,gi 158<br>065994,gi 2<br>0336613,gi <br>211637709,<br>gi 2181030<br>15,gi 51316<br>492,gi 5159<br>1897 | 81,804.10 | 100.00% | 6 | 7 | 7 | 0.07% | 12.10% | TLVTQN 3.14<br>SGVEALI<br>HAILR                                      | 1,935.10 |
| ATP | 6006 | tubulin,<br>beta 6                              | gi 1140521<br>48,gi 87578<br>360                                                                                                         | 49,882.10 | 99.80%  | 2 | 2 | 2 | 0.02% | 27.80% | AALVLDL 3.14<br>EPGTMD<br>SVR                                        | 1,589.78 |
| ATP | 6006 | tubulin,<br>beta 6                              | gi 1140521<br>48,gi 87578<br>360                                                                                                         | 49,882.10 | 99.80%  | 2 | 2 | 2 | 0.02% | 27.80% | GHYTEG 3.22<br>AELVDS<br>VLDVVR<br>K                                 | 2,087.08 |
| ATP | 6006 | tubulin,<br>beta 6                              | gi 1140521<br>48,gi 87578<br>360                                                                                                         | 49,882.10 | 99.80%  | 2 | 2 | 2 | 0.02% | 27.80% | LAVNMV 3.84<br>PFPR                                                  | 1,159.63 |
| ATP | 6006 | tubulin,<br>beta 6                              | gi 1140521<br>48,gi 87578<br>360                                                                                                         | 49,882.10 | 99.80%  | 2 | 2 | 2 | 0.02% | 27.80% | LHFFMP 3.24<br>GFAPLT<br>AR                                          | 1,620.84 |
| ATP | 6006 | tubulin,<br>beta 6                              | gi 1140521<br>48,gi 87578<br>360                                                                                                         | 49,882.10 | 99.80%  | 2 | 2 | 2 | 0.02% | 27.80% | MSATFIG 2.81<br>NSTAIQE<br>LFKR                                      | 2,030.04 |
| ATP | 6006 | tubulin,<br>beta 6                              | gi 1140521<br>48,gi 87578<br>360                                                                                                         | 49,882.10 | 99.80%  | 2 | 2 | 2 | 0.02% | 27.80% | VSDTVV 3.15<br>EPYNAT<br>LSVHQL<br>VENTDE<br>TYCIDNE<br>ALYDICF<br>R | 4,479.06 |
| ATP | 6006 | tubulin,<br>beta 6                              | gi 1140521<br>48,gi 87578<br>360                                                                                                         | 49,882.10 | 99.80%  | 2 | 2 | 2 | 0.02% | 27.80% | YLTVAA 2.35<br>VFR                                                   | 1,039.59 |
| ATP | 6006 | phospholi<br>pid<br>scramblas<br>e 3            | gi 1140514<br>05,gi 12041<br>9474,gi 920<br>98369                                                                                        | 32,206.90 | 99.80%  | 2 | 3 | 3 | 0.03% | 10.90% | EALTDT 2.74<br>DDFGLQ<br>FPLDLD<br>VR                                | 2,280.10 |
| ATP | 6006 | phospholi<br>pid<br>scramblas<br>e 3            | gi 1140514<br>05,gi 12041<br>9474,gi 920<br>98369                                                                                        | 32,206.90 | 99.80%  | 2 | 3 | 3 | 0.03% | 10.90% | FSIQDAD 2.48<br>RQTLLR                                               | 1,562.83 |
| ATP | 6006 | PREDIC<br>TED:<br>similar to<br>histone,<br>H2A | gi 7665118<br>1,gi 766896<br>92                                                                                                          | 14,148.10 | 99.80%  | 2 | 2 | 3 | 0.03% | 35.40% | AGLQFP 3.16<br>VGR                                                   | 944.5313 |
| ATP | 6006 | PREDIC<br>TED:<br>similar to<br>histone,<br>H2A | gi 7665118<br>1,gi 766896<br>92                                                                                                          | 14,148.10 | 99.80%  | 2 | 2 | 3 | 0.03% | 35.40% | HLQLAIR 2.43                                                         | 850.5258 |

|     |      |                                                 |                                                                   |           |         |   |    |    |       |        |                                          |          |
|-----|------|-------------------------------------------------|-------------------------------------------------------------------|-----------|---------|---|----|----|-------|--------|------------------------------------------|----------|
| ATP | 6006 | PREDIC<br>TED:<br>similar to<br>histone,<br>H2A | gi 7665118<br>1,gi 766896<br>92                                   | 14,148.10 | 99.80%  | 2 | 2  | 3  | 0.03% | 35.40% | HLQLAIR 3.81<br>NDEELN<br>KLLGR          | 2,132.19 |
| ATP | 6006 | PREDIC<br>TED:<br>similar to<br>histone,<br>H2A | gi 7665118<br>1,gi 766896<br>92                                   | 14,148.10 | 99.80%  | 2 | 2  | 3  | 0.03% | 35.40% | NDEELN 3.02<br>KLLGR                     | 1,300.69 |
| ATP | 6006 | PREDIC<br>TED:<br>similar to<br>histone,<br>H2A | gi 7665118<br>1,gi 766896<br>92                                   | 14,148.10 | 99.80%  | 2 | 2  | 3  | 0.03% | 35.40% | VTIAQG 5.02<br>GVLPNIQ<br>AVLLPK         | 1,931.17 |
| ATP | 6006 | syntaxin<br>7                                   | gi 1181508<br>40,gi 12214<br>0829,gi 735<br>86654                 | 29,638.60 | 100.00% | 3 | 3  | 3  | 0.03% | 13.00% | EFGSLPT 2.95<br>TPSDQR                   | 1,434.69 |
| ATP | 6006 | syntaxin<br>7                                   | gi 1181508<br>40,gi 12214<br>0829,gi 735<br>86654                 | 29,638.60 | 100.00% | 3 | 3  | 3  | 0.03% | 13.00% | TLNQLG 3.61<br>TPQDSPE<br>LR             | 1,668.86 |
| ATP | 6006 | syntaxin<br>7                                   | gi 1181508<br>40,gi 12214<br>0829,gi 735<br>86654                 | 29,638.60 | 100.00% | 3 | 3  | 3  | 0.03% | 13.00% | TLNQLG 2.3<br>TPQDSPE<br>LRQQLQ<br>QK    | 2,422.27 |
| ATP | 6006 | SEC11<br>homolog<br>A (S.<br>cerevisiae<br>)    | gi 1515546<br>19,gi 27806<br>149,gi 5403<br>9632,gi 697<br>9934   | 20,607.80 | 100.00% | 5 | 6  | 6  | 0.06% | 29.10% | FLTKGD 2.44<br>NNAVDD<br>RGLYK           | 1,925.97 |
| ATP | 6006 | SEC11<br>homolog<br>A (S.<br>cerevisiae<br>)    | gi 1515546<br>19,gi 27806<br>149,gi 5403<br>9632,gi 697<br>9934   | 20,607.80 | 100.00% | 5 | 6  | 6  | 0.06% | 29.10% | GDLLFL 2.98<br>TNRVED<br>PIR             | 1,757.95 |
| ATP | 6006 | SEC11<br>homolog<br>A (S.<br>cerevisiae<br>)    | gi 1515546<br>19,gi 27806<br>149,gi 5403<br>9632,gi 697<br>9934   | 20,607.80 | 100.00% | 5 | 6  | 6  | 0.06% | 29.10% | GDLLFL 3.52<br>TNRVED<br>PIRVGEI<br>VVFR | 2,657.48 |
| ATP | 6006 | SEC11<br>homolog<br>A (S.<br>cerevisiae<br>)    | gi 1515546<br>19,gi 27806<br>149,gi 5403<br>9632,gi 697<br>9934   | 20,607.80 | 100.00% | 5 | 6  | 6  | 0.06% | 29.10% | MLSLDF 1.95<br>LDDVRR                    | 1,495.76 |
| ATP | 6006 | SEC11<br>homolog<br>A (S.<br>cerevisiae<br>)    | gi 1515546<br>19,gi 27806<br>149,gi 5403<br>9632,gi 697<br>9934   | 20,607.80 | 100.00% | 5 | 6  | 6  | 0.06% | 29.10% | VGEIVVF 2.5<br>R                         | 918.5407 |
| ATP | 6006 | PREDIC<br>TED:<br>brain<br>protein<br>44        | gi 1198890<br>10,gi 19466<br>5199                                 | 14,264.40 | 99.80%  | 2 | 4  | 4  | 0.04% | 18.90% | LRPLYN 3.67<br>HPAGPR                    | 1,390.77 |
| ATP | 6006 | PREDIC<br>TED:<br>brain<br>protein<br>44        | gi 1198890<br>10,gi 19466<br>5199                                 | 14,264.40 | 99.80%  | 2 | 4  | 4  | 0.04% | 18.90% | VLDKVE 3.48<br>LLLPEK                    | 1,395.85 |
| ATP | 6006 | SLC3A2<br>protein                               | gi 1153049<br>25,gi 16444<br>8600,gi 598<br>57795,gi 74<br>354296 | 63,166.50 | 100.00% | 9 | 11 | 13 | 0.14% | 17.70% | EDFESLL 1.68<br>HSAK                     | 1,275.62 |



|     |      |                                            |                                                   |           |         |   |    |    |       |        |                                                  |      |          |
|-----|------|--------------------------------------------|---------------------------------------------------|-----------|---------|---|----|----|-------|--------|--------------------------------------------------|------|----------|
| ATP | 6006 | SLC3A2 protein                             | gi 115304925,gi 164448600,gi 59857795,gi 74354296 | 63,166.50 | 100.00% | 9 | 11 | 13 | 0.14% | 17.70% | FLVVLN<br>FGDVGQ<br>LAR                          | 4.96 | 1,647.92 |
| ATP | 6006 | SLC3A2 protein                             | gi 115304925,gi 164448600,gi 59857795,gi 74354296 | 63,166.50 | 100.00% | 9 | 11 | 13 | 0.14% | 17.70% | FTGLSKE<br>ELLK                                  | 3.53 | 1,264.71 |
| ATP | 6006 | SLC3A2 protein                             | gi 115304925,gi 164448600,gi 59857795,gi 74354296 | 63,166.50 | 100.00% | 9 | 11 | 13 | 0.14% | 17.70% | LLIAGTD<br>SSDLQQI<br>LR                         | 4.58 | 1,742.97 |
| ATP | 6006 | SLC3A2 protein                             | gi 115304925,gi 164448600,gi 59857795,gi 74354296 | 63,166.50 | 100.00% | 9 | 11 | 13 | 0.14% | 17.70% | NQEDDL<br>TETNLE<br>QIDPIFG<br>SK                | 4.44 | 2,406.13 |
| ATP | 6006 | SLC3A2 protein                             | gi 115304925,gi 164448600,gi 59857795,gi 74354296 | 63,166.50 | 100.00% | 9 | 11 | 13 | 0.14% | 17.70% | NQEDDL<br>TETNLE<br>QIDPIFG<br>SKEDFES<br>LLHSAK | 4.77 | 3,662.73 |
| ATP | 6006 | SLC3A2 protein                             | gi 115304925,gi 164448600,gi 59857795,gi 74354296 | 63,166.50 | 100.00% | 9 | 11 | 13 | 0.14% | 17.70% | SVSEDR<br>LLIAGTD<br>SSDLQQI<br>LR               | 4.77 | 2,416.27 |
| ATP | 6006 | SLC3A2 protein                             | gi 115304925,gi 164448600,gi 59857795,gi 74354296 | 63,166.50 | 100.00% | 9 | 11 | 13 | 0.14% | 17.70% | VDLLLS<br>TQPGR                                  | 2.44 | 1,198.68 |
| ATP | 6006 | SLC3A2 protein                             | gi 115304925,gi 164448600,gi 59857795,gi 74354296 | 63,166.50 | 100.00% | 9 | 11 | 13 | 0.14% | 17.70% | VILDLT<br>NYK                                    | 3.53 | 1,175.67 |
| ATP | 6006 | MHC class I antigen                        | gi 84095083                                       | 40,657.50 | 100.00% | 5 | 7  | 13 | 0.14% | 19.30% | EGEDQT<br>QDMELV<br>ETRPSG<br>DGTFQK             | 2.32 | 2,713.19 |
| ATP | 6006 | MHC class I antigen                        | gi 84095083                                       | 40,657.50 | 100.00% | 5 | 7  | 13 | 0.14% | 19.30% | FIAVGY<br>VDDTQF<br>VR                           | 4.62 | 1,629.83 |
| ATP | 6006 | MHC class I antigen                        | gi 84095083                                       | 40,657.50 | 100.00% | 5 | 7  | 13 | 0.14% | 19.30% | GYRQDA<br>YDGRDY<br>IALNEDL<br>R                 | 4.02 | 2,403.13 |
| ATP | 6006 | MHC class I antigen                        | gi 84095083                                       | 40,657.50 | 100.00% | 5 | 7  | 13 | 0.14% | 19.30% | QDAYDG<br>RDYIAL<br>NEDLR                        | 3.03 | 2,026.95 |
| ATP | 6006 | MHC class I antigen                        | gi 84095083                                       | 40,657.50 | 100.00% | 5 | 7  | 13 | 0.14% | 19.30% | YLENGK<br>DTLLR                                  | 2.07 | 1,321.71 |
| ATP | 6006 | eukaryotic translation elongation factor 2 | gi 115497900,gi 74353984,gi 88909609              | 95,352.20 | 100.00% | 3 | 3  | 3  | 0.03% | 4.31%  | ALLELQ<br>LEPEELY<br>QTFQR                       | 3.4  | 2,220.15 |

|     |      |                                                                                                                                                                                         |                                      |           |         |   |   |   |       |       |                  |      |          |
|-----|------|-----------------------------------------------------------------------------------------------------------------------------------------------------------------------------------------|--------------------------------------|-----------|---------|---|---|---|-------|-------|------------------|------|----------|
| ATP | 6006 | eukaryotic translation elongation factor 2                                                                                                                                              | gi 115497900,gi 74353984,gi 88909609 | 95,352.20 | 100.00% | 3 | 3 | 3 | 0.03% | 4.31% | FSVSPV VR        | 2.04 | 890.5093 |
| ATP | 6006 | eukaryotic translation elongation factor 2                                                                                                                                              | gi 115497900,gi 74353984,gi 88909609 | 95,352.20 | 100.00% | 3 | 3 | 3 | 0.03% | 4.31% | VFGSLV STGLK     | 2.98 | 1,107.64 |
| ATP | 6006 | RecName: Full=Serine palmitoyl transferase 1; AltName: Full=Serine-palmitoyl-CoA transferase 1; Short=SP T1; Short=SP T1; AltName: Full=Long chain base biosynthesis protein 1; Short=L | gi 122139929,gi 75948211,gi 77736443 | 52,771.80 | 99.80%  | 2 | 4 | 4 | 0.04% | 5.92% | LLKEQEI EDQKNP R | 3.79 | 1,739.93 |
| ATP | 6006 | RecName: Full=Serine palmitoyl transferase 1; AltName: Full=Serine-palmitoyl-CoA transferase 1; Short=SP T1; Short=SP T1; AltName: Full=Long chain base biosynthesis protein 1; Short=L | gi 122139929,gi 75948211,gi 77736443 | 52,771.80 | 99.80%  | 2 | 4 | 4 | 0.04% | 5.92% | VVVTVE QTEEDL EK | 2.98 | 1,617.82 |

|     |      |                                                                                                                                                                                             |                                                  |           |        |   |   |   |       |       |                  |      |          |
|-----|------|---------------------------------------------------------------------------------------------------------------------------------------------------------------------------------------------|--------------------------------------------------|-----------|--------|---|---|---|-------|-------|------------------|------|----------|
| ATP | 6006 | RecName :<br>Full=Syn<br>aptic<br>glycoprotein SC2;<br>AltName:<br>Full=Trans-2,3-enoyl-CoA reductase<br>;<br>Short=TE<br>R                                                                 | gi 1221409<br>18,gi 73586<br>600,gi 7773<br>6441 | 36,056.10 | 99.80% | 2 | 2 | 2 | 0.02% | 7.79% | LPVGGT<br>ATLYFR | 4.05 | 1,338.74 |
| ATP | 6006 | RecName :<br>Full=Syn<br>aptic<br>glycoprotein SC2;<br>AltName:<br>Full=Trans-2,3-enoyl-CoA reductase<br>;<br>Short=TE<br>R                                                                 | gi 1221409<br>18,gi 73586<br>600,gi 7773<br>6441 | 36,056.10 | 99.80% | 2 | 2 | 2 | 0.02% | 7.79% | MKHYEV<br>EILDAK | 3.46 | 1,491.75 |
| ATP | 6006 | RecName :<br>Full=Calcium/calm<br>odulin-dependent protein kinase type II beta chain;<br>Short=CaM-kinase II beta chain;<br>Short=CaM kinase II subunit beta;<br>Short=CaMK-II subunit beta | gi 1185724<br>89,gi 75773<br>666,gi 7836<br>9262 | 60,464.50 | 99.80% | 2 | 2 | 2 | 0.02% | 9.23% | DLKPEN<br>LLLASK | 2.71 | 1,340.78 |

|     |      |                                                                                                                                                                                                                                                                         |                      |         |   |    |    |       |        |                                                                |      |          |
|-----|------|-------------------------------------------------------------------------------------------------------------------------------------------------------------------------------------------------------------------------------------------------------------------------|----------------------|---------|---|----|----|-------|--------|----------------------------------------------------------------|------|----------|
| ATP | 6006 | RecName gi 1185724 :<br>89.gi 75773<br>Full=Calcium/calm<br>odulin-<br>dependen<br>t protein<br>kinase<br>type II<br>beta<br>chain;<br>Short=Ca<br>M-kinase<br>II beta<br>chain;<br>Short=Ca<br>M kinase<br>II subunit<br>beta;<br>Short=Ca<br>MK-II<br>subunit<br>beta | 60,464.50            | 99.80%  | 2 | 2  | 2  | 0.02% | 9.23%  | LYQQIK<br>AGAYDF<br>PSPEWD<br>TVTPEA<br>KNLINQ<br>MLTINP<br>AK | 3.42 | 4,321.19 |
| ATP | 6006 | PREDIC TED: 4<br>similar to<br>Calpain-5<br>(nCL-3)<br>(htra-3)<br>isoform 1                                                                                                                                                                                            | gi 7663613 72,988.00 | 99.90%  | 2 | 2  | 2  | 0.02% | 4.69%  | ANADDL<br>QALHTL<br>HLR                                        | 3.53 | 1,687.89 |
| ATP | 6006 | PREDIC TED: 4<br>similar to<br>Calpain-5<br>(nCL-3)<br>(htra-3)<br>isoform 1                                                                                                                                                                                            | gi 7663613 72,988.00 | 99.90%  | 2 | 2  | 2  | 0.02% | 4.69%  | NSRQPS<br>DLPGTV<br>AVR                                        | 3.09 | 1,596.85 |
| ATP | 6006 | RAB5C, member<br>RAS oncogene<br>family                                                                                                                                                                                                                                 | gi 1096591 23,448.70 | 100.00% | 7 | 10 | 13 | 0.14% | 41.20% | AVEFQE<br>AQAYAE<br>DNSLLF<br>METSACK                          | 4.27 | 2,708.24 |
| ATP | 6006 | RAB5C, member<br>RAS oncogene<br>family                                                                                                                                                                                                                                 | gi 1096591 23,448.70 | 100.00% | 7 | 10 | 13 | 0.14% | 41.20% | GVDLQE<br>NNPASR                                               | 2.03 | 1,299.63 |
| ATP | 6006 | RAB5C, member<br>RAS oncogene<br>family                                                                                                                                                                                                                                 | gi 1096591 23,448.70 | 100.00% | 7 | 10 | 13 | 0.14% | 41.20% | KLPKNE<br>PQNAAG<br>APGR                                       | 3.27 | 1,647.89 |
| ATP | 6006 | RAB5C, member<br>RAS oncogene<br>family                                                                                                                                                                                                                                 | gi 1096591 23,448.70 | 100.00% | 7 | 10 | 13 | 0.14% | 41.20% | LVLLGE<br>SAVGK                                                | 2.87 | 1,085.66 |
| ATP | 6006 | RAB5C, member<br>RAS oncogene<br>family                                                                                                                                                                                                                                 | gi 1096591 23,448.70 | 100.00% | 7 | 10 | 13 | 0.14% | 41.20% | NRGVDL<br>QENNPA<br>SR                                         | 4.8  | 1,569.77 |

|     |      |                                                                                                                                             |                                                                                                           |           |         |   |    |    |       |        |                                 |          |
|-----|------|---------------------------------------------------------------------------------------------------------------------------------------------|-----------------------------------------------------------------------------------------------------------|-----------|---------|---|----|----|-------|--------|---------------------------------|----------|
| ATP | 6006 | RAB5C, member<br>RAS oncogene<br>family                                                                                                     | gi 1096591<br>70,gi 61553<br>191,gi 7505<br>2596,gi 777<br>36431                                          | 23,448.70 | 100.00% | 7 | 10 | 13 | 0.14% | 41.20% | QASPNIV 3.65<br>IALAGN<br>K     | 1,395.80 |
| ATP | 6006 | RAB5C, member<br>RAS oncogene<br>family                                                                                                     | gi 1096591<br>70,gi 61553<br>191,gi 7505<br>2596,gi 777<br>36431                                          | 23,448.70 | 100.00% | 7 | 10 | 13 | 0.14% | 41.20% | YHSLAP 2.55<br>MYR              | 1,316.61 |
| ATP | 6006 | PREDIC TED:<br>similar to<br>RAB6A,<br>member<br>RAS<br>oncogene<br>family<br>isoform 2                                                     | gi 1199075<br>95,gi 11990<br>7597                                                                         | 23,545.30 | 100.00% | 3 | 4  | 7  | 0.07% | 21.60% | ELNVMF 3.3<br>IETSAK            | 1,397.70 |
| ATP | 6006 | PREDIC TED:<br>similar to<br>RAB6A,<br>member<br>RAS<br>oncogene<br>family<br>isoform 2                                                     | gi 1199075<br>95,gi 11990<br>7597                                                                         | 23,545.30 | 100.00% | 3 | 4  | 7  | 0.07% | 21.60% | GSDVIIM 3.5<br>LVGNKT<br>DLADKR | 2,061.10 |
| ATP | 6006 | PREDIC TED:<br>similar to<br>RAB6A,<br>member<br>RAS<br>oncogene<br>family<br>isoform 2                                                     | gi 1199075<br>95,gi 11990<br>7597                                                                         | 23,545.30 | 100.00% | 3 | 4  | 7  | 0.07% | 21.60% | VAAALP 2.17<br>GMESTQ<br>DR     | 1,461.70 |
| ATP | 6006 | Chain F,<br>Cadmium Ion<br>Binding<br>Structure<br>Of<br>Bovine<br>Heart<br>Cytochrome C<br>Oxidase<br>In The<br>Fully<br>Oxidized<br>State | gi 1492415<br>41,gi 14924<br>1554,gi 149<br>241571,gi 1<br>49241584,g<br>i 14924160<br>1,gi 149241<br>614 | 10,651.90 | 99.80%  | 2 | 2  | 2  | 0.02% | 12.20% | GQDPYN 2.8<br>ILAPK             | 1,215.64 |
| ATP | 6006 | Chain F,<br>Cadmium Ion<br>Binding<br>Structure<br>Of<br>Bovine<br>Heart<br>Cytochrome C<br>Oxidase<br>In The<br>Fully<br>Oxidized<br>State | gi 1492415<br>41,gi 14924<br>1554,gi 149<br>241571,gi 1<br>49241584,g<br>i 14924160<br>1,gi 149241<br>614 | 10,651.90 | 99.80%  | 2 | 2  | 2  | 0.02% | 12.20% | KGQDPY 2.97<br>NILAPK           | 1,343.73 |

|     |      |                                                                  |            |           |        |   |   |   |       |        |                             |      |          |
|-----|------|------------------------------------------------------------------|------------|-----------|--------|---|---|---|-------|--------|-----------------------------|------|----------|
| ATP | 6006 | PREDIC TED: 88<br>similar to Actin, cytoplasmic 2 (Beta-actin-2) | gi 1946763 | 41,854.80 | 99.80% | 2 | 5 | 8 | 0.08% | 28.50% | DLTDYL MK                   | 2.38 | 1,014.48 |
| ATP | 6006 | PREDIC TED: 88<br>similar to Actin, cytoplasmic 2 (Beta-actin-2) | gi 1946763 | 41,854.80 | 99.80% | 2 | 5 | 8 | 0.08% | 28.50% | GYSFTT TAER                 | 3.24 | 1,132.53 |
| ATP | 6006 | PREDIC TED: 88<br>similar to Actin, cytoplasmic 2 (Beta-actin-2) | gi 1946763 | 41,854.80 | 99.80% | 2 | 5 | 8 | 0.08% | 28.50% | GYSFTT TAEREIV R            | 1.81 | 1,629.82 |
| ATP | 6006 | PREDIC TED: 88<br>similar to Actin, cytoplasmic 2 (Beta-actin-2) | gi 1946763 | 41,854.80 | 99.80% | 2 | 5 | 8 | 0.08% | 28.50% | HQGVM VGMGQ KDCYVG DEAQSK   | 3.01 | 2,383.05 |
| ATP | 6006 | PREDIC TED: 88<br>similar to Actin, cytoplasmic 2 (Beta-actin-2) | gi 1946763 | 41,854.80 | 99.80% | 2 | 5 | 8 | 0.08% | 28.50% | HQGVM VGMGQ KDCYVG DEAQSK R | 4.14 | 2,539.15 |
| ATP | 6006 | PREDIC TED: 88<br>similar to Actin, cytoplasmic 2 (Beta-actin-2) | gi 1946763 | 41,854.80 | 99.80% | 2 | 5 | 8 | 0.08% | 28.50% | IKIAPPE R                   | 2.89 | 1,036.65 |
| ATP | 6006 | PREDIC TED: 88<br>similar to Actin, cytoplasmic 2 (Beta-actin-2) | gi 1946763 | 41,854.80 | 99.80% | 2 | 5 | 8 | 0.08% | 28.50% | IKIAPPE RK                  | 2.84 | 1,164.75 |
| ATP | 6006 | PREDIC TED: 88<br>similar to Actin, cytoplasmic 2 (Beta-actin-2) | gi 1946763 | 41,854.80 | 99.80% | 2 | 5 | 8 | 0.08% | 28.50% | LDLAGR DLTDYL MK            | 3.45 | 1,639.84 |

|     |      |                                                                       |                                      |            |         |   |    |    |       |        |                                                |      |          |
|-----|------|-----------------------------------------------------------------------|--------------------------------------|------------|---------|---|----|----|-------|--------|------------------------------------------------|------|----------|
| ATP | 6006 | PREDICTED:<br>similar to<br>Actin,<br>cytoplasmic 2<br>(Beta-actin-2) | gi 194676388                         | 41,854.80  | 99.80%  | 2 | 5  | 8  | 0.08% | 28.50% | SYELPD<br>GQVITIG<br>NER                       | 4    | 1,790.89 |
| ATP | 6006 | PREDICTED:<br>similar to<br>Actin,<br>cytoplasmic 2<br>(Beta-actin-2) | gi 194676388                         | 41,854.80  | 99.80%  | 2 | 5  | 8  | 0.08% | 28.50% | TTGIVM<br>DSGDGV<br>THTVPIY<br>EGYALP<br>HAILR | 5.71 | 3,199.61 |
| ATP | 6006 | Transducin (beta)-like 2                                              | gi 112362303,gi 115495815            | 49,894.00  | 99.80%  | 2 | 2  | 2  | 0.02% | 5.83%  | APIVNIGI<br>ADTGK                              | 3.51 | 1,268.72 |
| ATP | 6006 | Transducin (beta)-like 2                                              | gi 112362303,gi 115495815            | 49,894.00  | 99.80%  | 2 | 2  | 2  | 0.02% | 5.83%  | LQQQLT<br>QAQEAL<br>K                          | 2.89 | 1,498.82 |
| ATP | 6006 | Hexokinase 1                                                          | gi 154426122,gi 33332343,gi 60592784 | 102,191.60 | 100.00% | 8 | 12 | 12 | 0.13% | 11.00% | FKASGV<br>EGTDVV<br>K                          | 4.28 | 1,336.71 |
| ATP | 6006 | Hexokinase 1                                                          | gi 154426122,gi 33332343,gi 60592784 | 102,191.60 | 100.00% | 8 | 12 | 12 | 0.13% | 11.00% | GKFNTS<br>DVSAIEK                              | 3.22 | 1,395.71 |
| ATP | 6006 | Hexokinase 1                                                          | gi 154426122,gi 33332343,gi 60592784 | 102,191.60 | 100.00% | 8 | 12 | 12 | 0.13% | 11.00% | KIDKYL<br>YAMR                                 | 2.57 | 1,316.70 |
| ATP | 6006 | Hexokinase 1                                                          | gi 154426122,gi 33332343,gi 60592784 | 102,191.60 | 100.00% | 8 | 12 | 12 | 0.13% | 11.00% | LSDETL<br>DIMNR                                | 3.51 | 1,435.71 |
| ATP | 6006 | Hexokinase 1                                                          | gi 154426122,gi 33332343,gi 60592784 | 102,191.60 | 100.00% | 8 | 12 | 12 | 0.13% | 11.00% | NKEGLH<br>NAKEIL<br>R                          | 3.4  | 1,622.90 |
| ATP | 6006 | Hexokinase 1                                                          | gi 154426122,gi 33332343,gi 60592784 | 102,191.60 | 100.00% | 8 | 12 | 12 | 0.13% | 11.00% | QIEETLA<br>HFSLTK                              | 3.5  | 1,516.80 |
| ATP | 6006 | Hexokinase 1                                                          | gi 154426122,gi 33332343,gi 60592784 | 102,191.60 | 100.00% | 8 | 12 | 12 | 0.13% | 11.00% | SANLVA<br>ATLGAIL<br>SR                        | 4.31 | 1,456.85 |
| ATP | 6006 | Hexokinase 1                                                          | gi 154426122,gi 33332343,gi 60592784 | 102,191.60 | 100.00% | 8 | 12 | 12 | 0.13% | 11.00% | TTVGVD<br>GSLYK                                | 2.57 | 1,139.59 |
| ATP | 6006 | RecName: Full=Cadherin-13; Flags: Precursor                           | gi 110832787,gi 77567834,gi 78369244 | 78,179.40  | 100.00% | 3 | 5  | 5  | 0.05% | 6.87%  | INENTGS<br>VSVTR                               | 3.23 | 1,276.65 |
| ATP | 6006 | RecName: Full=Cadherin-13; Flags: Precursor                           | gi 110832787,gi 77567834,gi 78369244 | 78,179.40  | 100.00% | 3 | 5  | 5  | 0.05% | 6.87%  | SIVVSPIL<br>IPENQR                             | 3.95 | 1,564.91 |

|     |      |                                                                                                                                                                                                               |           |         |   |   |   |       |        |                                     |      |          |
|-----|------|---------------------------------------------------------------------------------------------------------------------------------------------------------------------------------------------------------------|-----------|---------|---|---|---|-------|--------|-------------------------------------|------|----------|
| ATP | 6006 | RecName gi 1108327 :<br>87,gi 77567<br>Full=Cad 834,gi 7836<br>herin-13; 9244<br>Flags:<br>Precursor                                                                                                          | 78,179.40 | 100.00% | 3 | 5 | 5 | 0.05% | 6.87%  | TLEGPV<br>PLEVIVI<br>DQNDNR<br>PIFR | 3.23 | 2,634.43 |
| ATP | 6006 | EGF, gi 1153051<br>latrophili 44,gi 11600<br>n and 4035<br>seven<br>transmem<br>brane<br>domain<br>containin<br>g 1                                                                                           | 77,458.50 | 99.80%  | 2 | 2 | 2 | 0.02% | 3.34%  | IRHIEEP<br>VALLR                    | 4.06 | 1,445.86 |
| ATP | 6006 | EGF, gi 1153051<br>latrophili 44,gi 11600<br>n and 4035<br>seven<br>transmem<br>brane<br>domain<br>containin<br>g 1                                                                                           | 77,458.50 | 99.80%  | 2 | 2 | 2 | 0.02% | 3.34%  | LIHTAEQ<br>ATLR                     | 3.18 | 1,252.70 |
| ATP | 6006 | PREDIC gi 1198932<br>TED: 24<br>similar to<br>ER<br>lumen<br>protein<br>retaining<br>receptor<br>3 (KDEL<br>receptor<br>3)<br>(KDEL<br>endoplas<br>mic<br>reticulum<br>protein<br>retention<br>receptor<br>3) | 24,969.50 | 99.80%  | 2 | 2 | 2 | 0.02% | 11.20% | ILGDLSH<br>LLAMILL<br>LGK           | 4.6  | 1,836.10 |
| ATP | 6006 | PREDIC gi 1198932<br>TED: 24<br>similar to<br>ER<br>lumen<br>protein<br>retaining<br>receptor<br>3 (KDEL<br>receptor<br>3)<br>(KDEL<br>endoplas<br>mic<br>reticulum<br>protein<br>retention<br>receptor<br>3) | 24,969.50 | 99.80%  | 2 | 2 | 2 | 0.02% | 11.20% | LSLPMPI                             | 1.83 | 786.4432 |



|     |      |                                                                                                                                                                                                           |           |         |    |    |    |       |        |                                             |          |
|-----|------|-----------------------------------------------------------------------------------------------------------------------------------------------------------------------------------------------------------|-----------|---------|----|----|----|-------|--------|---------------------------------------------|----------|
| ATP | 6006 | RecName gi 115421,g<br>: i 19467806<br>Full=Cad 8,gi 664894<br>herin-2;<br>AltName:<br>Full=Neu<br>ral<br>cadherin;<br>Short=N-<br>cadherin;<br>AltName:<br>CD_antig<br>en=CD32<br>5; Flags:<br>Precursor | 96,830.40 | 100.00% | 11 | 14 | 14 | 0.15% | 22.10% | FAIQTDP 3.51<br>NSNDGL<br>VTVVKPI<br>DFETNR | 2,890.46 |
| ATP | 6006 | RecName gi 115421,g<br>: i 19467806<br>Full=Cad 8,gi 664894<br>herin-2;<br>AltName:<br>Full=Neu<br>ral<br>cadherin;<br>Short=N-<br>cadherin;<br>AltName:<br>CD_antig<br>en=CD32<br>5; Flags:<br>Precursor | 96,830.40 | 100.00% | 11 | 14 | 14 | 0.15% | 22.10% | FLEAGIY 3.16<br>EVPIITD<br>SGNPPK           | 2,273.21 |
| ATP | 6006 | RecName gi 115421,g<br>: i 19467806<br>Full=Cad 8,gi 664894<br>herin-2;<br>AltName:<br>Full=Neu<br>ral<br>cadherin;<br>Short=N-<br>cadherin;<br>AltName:<br>CD_antig<br>en=CD32<br>5; Flags:<br>Precursor | 96,830.40 | 100.00% | 11 | 14 | 14 | 0.15% | 22.10% | GPPFQEL 2.5<br>VR                           | 1,042.57 |

|     |      |                                                                                                                                                                                                           |           |         |    |    |    |       |        |                               |          |
|-----|------|-----------------------------------------------------------------------------------------------------------------------------------------------------------------------------------------------------------|-----------|---------|----|----|----|-------|--------|-------------------------------|----------|
| ATP | 6006 | RecName gi 115421,g<br>: i 19467806<br>Full=Cad 8,gi 664894<br>herin-2;<br>AltName:<br>Full=Neu<br>ral<br>cadherin;<br>Short=N-<br>cadherin;<br>AltName:<br>CD_antig<br>en=CD32<br>5; Flags:<br>Precursor | 96,830.40 | 100.00% | 11 | 14 | 14 | 0.15% | 22.10% | LDERPIH 2.38<br>AEPQYP<br>VR  | 1,819.95 |
| ATP | 6006 | RecName gi 115421,g<br>: i 19467806<br>Full=Cad 8,gi 664894<br>herin-2;<br>AltName:<br>Full=Neu<br>ral<br>cadherin;<br>Short=N-<br>cadherin;<br>AltName:<br>CD_antig<br>en=CD32<br>5; Flags:<br>Precursor | 96,830.40 | 100.00% | 11 | 14 | 14 | 0.15% | 22.10% | MYVLTV 3.12<br>AAENQV<br>PLAK | 1,762.94 |
| ATP | 6006 | RecName gi 115421,g<br>: i 19467806<br>Full=Cad 8,gi 664894<br>herin-2;<br>AltName:<br>Full=Neu<br>ral<br>cadherin;<br>Short=N-<br>cadherin;<br>AltName:<br>CD_antig<br>en=CD32<br>5; Flags:<br>Precursor | 96,830.40 | 100.00% | 11 | 14 | 14 | 0.15% | 22.10% | QLLIDPE 2.61<br>DDVR          | 1,312.67 |

|     |      |                                                                                                                                                                                                           |           |         |    |    |    |       |        |                                                              |          |
|-----|------|-----------------------------------------------------------------------------------------------------------------------------------------------------------------------------------------------------------|-----------|---------|----|----|----|-------|--------|--------------------------------------------------------------|----------|
| ATP | 6006 | RecName gi 115421,g<br>: i 19467806<br>Full=Cad 8,gi 664894<br>herin-2;<br>AltName:<br>Full=Neu<br>ral<br>cadherin;<br>Short=N-<br>cadherin;<br>AltName:<br>CD_antig<br>en=CD32<br>5; Flags:<br>Precursor | 96,830.40 | 100.00% | 11 | 14 | 14 | 0.15% | 22.10% | QLLIDPE 2.01<br>DDVRDN<br>ILK                                | 1,896.01 |
| ATP | 6006 | RecName gi 115421,g<br>: i 19467806<br>Full=Cad 8,gi 664894<br>herin-2;<br>AltName:<br>Full=Neu<br>ral<br>cadherin;<br>Short=N-<br>cadherin;<br>AltName:<br>CD_antig<br>en=CD32<br>5; Flags:<br>Precursor | 96,830.40 | 100.00% | 11 | 14 | 14 | 0.15% | 22.10% | SAAPHP 4.4<br>GDIGDFI<br>NEGLK                               | 1,837.91 |
| ATP | 6006 | RecName gi 115421,g<br>: i 19467806<br>Full=Cad 8,gi 664894<br>herin-2;<br>AltName:<br>Full=Neu<br>ral<br>cadherin;<br>Short=N-<br>cadherin;<br>AltName:<br>CD_antig<br>en=CD32<br>5; Flags:<br>Precursor | 96,830.40 | 100.00% | 11 | 14 | 14 | 0.15% | 22.10% | YDEEGG 4.67<br>GEEDQD<br>YDLSQL<br>QQPDTV<br>EPDAIKP<br>VGIR | 3,905.78 |

|     |      |                                                                                                                                                                                                                                                                                                    |           |         |    |    |    |       |        |                                                            |      |          |
|-----|------|----------------------------------------------------------------------------------------------------------------------------------------------------------------------------------------------------------------------------------------------------------------------------------------------------|-----------|---------|----|----|----|-------|--------|------------------------------------------------------------|------|----------|
| ATP | 6006 | RecName gi 115421.g<br>:<br>Full=Cad<br>herin-2;<br>AltName:<br>Full=Neu<br>ral<br>cadherin;<br>Short=N-<br>cadherin;<br>AltName:<br>CD_antig<br>en=CD32<br>5; Flags:<br>Precursor                                                                                                                 | 96,830.40 | 100.00% | 11 | 14 | 14 | 0.15% | 22.10% | YSVTGP<br>GADQPP<br>TGIFIINP<br>ISGQLSV<br>TKPLDR          | 3.22 | 3,438.83 |
| ATP | 6006 | RecName gi 115421.g<br>:<br>Full=Cad<br>herin-2;<br>AltName:<br>Full=Neu<br>ral<br>cadherin;<br>Short=N-<br>cadherin;<br>AltName:<br>CD_antig<br>en=CD32<br>5; Flags:<br>Precursor                                                                                                                 | 96,830.40 | 100.00% | 11 | 14 | 14 | 0.15% | 22.10% | YSVTGP<br>GADQPP<br>TGIFIINP<br>ISGQLSV<br>TKPLDR<br>ELIAR | 3.65 | 4,021.18 |
| ATP | 6006 | RecName gi 1099400<br>:<br>Full=Cyt<br>ochrome<br>c1, heme<br>protein,<br>mitochon<br>drial;<br>AltName:<br>Full=Ubi<br>quinol-<br>cytochro<br>me-c<br>reductase<br>complex<br>cytochro<br>me c1<br>subunit;<br>Short=Cy<br>tochrome<br>c-1;<br>AltName:<br>Full=Cyt<br>ochrome<br>b-c1<br>complex | 35,279.50 | 99.90%  | 2  | 3  | 4  | 0.04% | 11.10% | LSDYFP<br>KPYPNP<br>EAAR                                   | 3.68 | 1,864.92 |

|     |      |                                                                                                                                                                                                      |                                                                                                               |           |         |   |    |    |       |        |                                                                       |          |
|-----|------|------------------------------------------------------------------------------------------------------------------------------------------------------------------------------------------------------|---------------------------------------------------------------------------------------------------------------|-----------|---------|---|----|----|-------|--------|-----------------------------------------------------------------------|----------|
| ATP | 6006 | RecName : Full=Cytochrome c1, heme protein, mitochondrial; AltName: Full=Ubiquinol-cytochrome-c reductase complex cytochrome c1 subunit; Short=Cytochrome c-1; AltName: Full=Cytochrome b-c1 complex | gi 109940069,gi 114793904,gi 71042588,gi 75765182,gi 75765193,gi 82407279,gi 82407290,gi 83638779,gi 84000289 | 35,279.50 | 99.90%  | 2 | 3  | 4  | 0.04% | 11.10% | MGLKM 2.7<br>LLMMGL<br>LLPLVY<br>AMK                                  | 2,266.26 |
| ATP | 6006 | F1-F0-ATPase                                                                                                                                                                                         | gi 162701,gi 231615,gi 28603752,gi 74268301                                                                   | 8,303.10  | 100.00% | 3 | 4  | 7  | 0.07% | 40.80% | ELAEAQ 3.86<br>EDTILK                                                 | 1,359.70 |
| ATP | 6006 | F1-F0-ATPase                                                                                                                                                                                         | gi 162701,gi 231615,gi 28603752,gi 74268301                                                                   | 8,303.10  | 100.00% | 3 | 4  | 7  | 0.07% | 40.80% | RIERELA 2.66<br>EAQEDTILK                                             | 1,914.03 |
| ATP | 6006 | F1-F0-ATPase                                                                                                                                                                                         | gi 162701,gi 231615,gi 28603752,gi 74268301                                                                   | 8,303.10  | 100.00% | 3 | 4  | 7  | 0.07% | 40.80% | YSALFL 4.07<br>GMAYGAK                                                | 1,407.70 |
| ATP | 6006 | P4HB protein                                                                                                                                                                                         | gi 148878430,gi 152941196                                                                                     | 57,187.70 | 100.00% | 8 | 10 | 10 | 0.11% | 27.10% | FDEGRN 2.66<br>NFEGEV<br>TKEK                                         | 1,898.89 |
| ATP | 6006 | P4HB protein                                                                                                                                                                                         | gi 148878430,gi 152941196                                                                                     | 57,187.70 | 100.00% | 8 | 10 | 10 | 0.11% | 27.10% | FLESGG 5.48<br>QDGAGD<br>DDDLED<br>LEEAEPP<br>DLEEDD<br>DQKAVK<br>DEL | 4,394.84 |
| ATP | 6006 | P4HB protein                                                                                                                                                                                         | gi 148878430,gi 152941196                                                                                     | 57,187.70 | 100.00% | 8 | 10 | 10 | 0.11% | 27.10% | GNFDEA 1.64<br>LAAHK                                                  | 1,172.57 |
| ATP | 6006 | P4HB protein                                                                                                                                                                                         | gi 148878430,gi 152941196                                                                                     | 57,187.70 | 100.00% | 8 | 10 | 10 | 0.11% | 27.10% | HNQLPL 3.9<br>VIEFTEQ<br>TAPK                                         | 1,965.04 |
| ATP | 6006 | P4HB protein                                                                                                                                                                                         | gi 148878430,gi 152941196                                                                                     | 57,187.70 | 100.00% | 8 | 10 | 10 | 0.11% | 27.10% | ILFIFIDS 2.12<br>DHTDNQR                                              | 1,833.91 |
| ATP | 6006 | P4HB protein                                                                                                                                                                                         | gi 148878430,gi 152941196                                                                                     | 57,187.70 | 100.00% | 8 | 10 | 10 | 0.11% | 27.10% | LITLEEE 2.74<br>MTK                                                   | 1,222.62 |
| ATP | 6006 | P4HB protein                                                                                                                                                                                         | gi 148878430,gi 152941196                                                                                     | 57,187.70 | 100.00% | 8 | 10 | 10 | 0.11% | 27.10% | VDATEE 3.35<br>SDLAQQ<br>YGVR                                         | 1,780.83 |
| ATP | 6006 | P4HB protein                                                                                                                                                                                         | gi 148878430,gi 152941196                                                                                     | 57,187.70 | 100.00% | 8 | 10 | 10 | 0.11% | 27.10% | YQLDKD 3.4<br>GVVLFK<br>K                                             | 1,552.87 |

|     |      |                                                                                    |                       |         |   |   |   |       |        |                              |      |          |
|-----|------|------------------------------------------------------------------------------------|-----------------------|---------|---|---|---|-------|--------|------------------------------|------|----------|
| ATP | 6006 | RecName gi 1088609 : 22,gi 75773 Full=Ras-827,gi 7836 related 9332 protein Rab-11B | 24,471.00             | 100.00% | 3 | 4 | 5 | 0.05% | 16.10% | FTRNEF NLESK                 | 3.65 | 1,384.69 |
| ATP | 6006 | RecName gi 1088609 : 22,gi 75773 Full=Ras-827,gi 7836 related 9332 protein Rab-11B | 24,471.00             | 100.00% | 3 | 4 | 5 | 0.05% | 16.10% | GAVGAL LVYDIA K              | 3.49 | 1,289.75 |
| ATP | 6006 | RecName gi 1088609 : 22,gi 75773 Full=Ras-827,gi 7836 related 9332 protein Rab-11B | 24,471.00             | 100.00% | 3 | 4 | 5 | 0.05% | 16.10% | VVLIGDS GVVK                 | 2.54 | 1,043.61 |
| ATP | 6006 | translocas e of inner mitochon drial membran e 50 homolog                          | gi 1106656 40,747.80  | 99.80%  | 2 | 2 | 2 | 0.02% | 9.72%  | IPDEFDN DPILVQQ LR           | 3.14 | 1,911.98 |
| ATP | 6006 | translocas e of inner mitochon drial membran e 50 homolog                          | gi 1106656 40,747.80  | 99.80%  | 2 | 2 | 2 | 0.02% | 9.72%  | TVLEHY ALEEDP LEAFKQ R       | 2.63 | 2,288.16 |
| ATP | 6006 | PREDIC TED: ATP-binding cassette, sub-family B (MDR/TAP), member 1                 | gi 1946853 144,522.00 | 100.00% | 3 | 3 | 3 | 0.03% | 3.57%  | ILLLDEA TSALDT ESEAVV QAALDK | 3.35 | 2,615.37 |
| ATP | 6006 | PREDIC TED: ATP-binding cassette, sub-family B (MDR/TAP), member 1                 | gi 1946853 144,522.00 | 100.00% | 3 | 3 | 3 | 0.03% | 3.57%  | STVVQL LER                   | 2.53 | 1,044.60 |
| ATP | 6006 | PREDIC TED: ATP-binding cassette, sub-family B (MDR/TAP), member 1                 | gi 1946853 144,522.00 | 100.00% | 3 | 3 | 3 | 0.03% | 3.57%  | YGREDV TMDEIQ K              | 3.33 | 1,599.73 |

|     |      |                                                                                             |                                                                                                                                                                           |            |         |   |   |   |       |        |                                                                     |          |
|-----|------|---------------------------------------------------------------------------------------------|---------------------------------------------------------------------------------------------------------------------------------------------------------------------------|------------|---------|---|---|---|-------|--------|---------------------------------------------------------------------|----------|
| ATP | 6006 | PREDIC TED:<br>similar to<br>DIP2<br>disco-<br>interactin<br>g protein<br>2<br>homolog<br>B | gi 1198921<br>37                                                                                                                                                          | 171,462.20 | 99.80%  | 2 | 2 | 2 | 0.02% | 3.24%  | DLGQIEE 3.16<br>NDLVR                                               | 1,400.70 |
| ATP | 6006 | PREDIC TED:<br>similar to<br>DIP2<br>disco-<br>interactin<br>g protein<br>2<br>homolog<br>B | gi 1198921<br>37                                                                                                                                                          | 171,462.20 | 99.80%  | 2 | 2 | 2 | 0.02% | 3.24%  | GEPLGVI 3.6<br>CNWPPA<br>LESALQ<br>RWGTTQ<br>AKCPCL<br>TALDVT<br>GK | 4,124.08 |
| ATP | 6006 | ATP synthase, H+ transporting, mitochondrial F1 complex, gamma polypeptide 1                | gi 1154954<br>11,gi 15842<br>8988,gi 158<br>428995,gi 1<br>58429005,g<br>i 15842901<br>2,gi 158429<br>019,gi 1584<br>29026,gi 15<br>8431072,gi <br>543874,gi 7<br>4268047 | 33,055.70  | 100.00% | 3 | 3 | 3 | 0.03% | 19.10% | NASEMI 3.66<br>DKLTLT<br>FNR                                        | 1,768.89 |
| ATP | 6006 | ATP synthase, H+ transporting, mitochondrial F1 complex, gamma polypeptide 1                | gi 1154954<br>11,gi 15842<br>8988,gi 158<br>428995,gi 1<br>58429005,g<br>i 15842901<br>2,gi 158429<br>019,gi 1584<br>29026,gi 15<br>8431072,gi <br>543874,gi 7<br>4268047 | 33,055.70  | 100.00% | 3 | 3 | 3 | 0.03% | 19.10% | TEEKPIF 4.33<br>SLDTISS<br>AESMSIY<br>DDIDAD<br>VLR                 | 3,376.60 |
| ATP | 6006 | ATP synthase, H+ transporting, mitochondrial F1 complex, gamma polypeptide 1                | gi 1154954<br>11,gi 15842<br>8988,gi 158<br>428995,gi 1<br>58429005,g<br>i 15842901<br>2,gi 158429<br>019,gi 1584<br>29026,gi 15<br>8431072,gi <br>543874,gi 7<br>4268047 | 33,055.70  | 100.00% | 3 | 3 | 3 | 0.03% | 19.10% | VYGVGS 4.07<br>LALYEK                                               | 1,298.70 |
| ATP | 6006 | transgelin 2                                                                                | gi 5985829<br>5,gi 618888<br>74,gi 73919<br>851                                                                                                                           | 22,408.90  | 100.00% | 2 | 2 | 3 | 0.03% | 17.10% | TLMNLG 3.16<br>GLAVAR                                               | 1,231.68 |
| ATP | 6006 | transgelin 2                                                                                | gi 5985829<br>5,gi 618888<br>74,gi 73919<br>851                                                                                                                           | 22,408.90  | 100.00% | 2 | 2 | 3 | 0.03% | 17.10% | YFSDNQ 4.82<br>LQEGKN<br>VIGLQM<br>GTNR                             | 2,528.22 |

|     |      |                                                                                                            |            |           |         |   |   |   |       |       |                          |      |          |
|-----|------|------------------------------------------------------------------------------------------------------------|------------|-----------|---------|---|---|---|-------|-------|--------------------------|------|----------|
| ATP | 6006 | PREDIC TED: 09<br>similar to Heparan sulfate 2-O-sulfotransferase 1 (2-O-sulfotransferase) (2OST), partial | gi 1198899 | 37,063.70 | 99.80%  | 2 | 2 | 2 | 0.02% | 8.28% | EKDGDLYILAQNF<br>FYEK    | 3.34 | 2,093.02 |
| ATP | 6006 | PREDIC TED: 09<br>similar to Heparan sulfate 2-O-sulfotransferase 1 (2-O-sulfotransferase) (2OST), partial | gi 1198899 | 37,063.70 | 99.80%  | 2 | 2 | 2 | 0.02% | 8.28% | LVSYYY<br>FLR            | 2.37 | 1,223.65 |
| ATP | 6006 | PREDIC TED: 52<br>similar to transferri n receptor                                                         | gi 1198796 | 85,420.40 | 100.00% | 7 | 8 | 9 | 0.09% | 9.75% | FVKEMN<br>LFR            | 2.53 | 1,199.62 |
| ATP | 6006 | PREDIC TED: 52<br>similar to transferri n receptor                                                         | gi 1198796 | 85,420.40 | 100.00% | 7 | 8 | 9 | 0.09% | 9.75% | IMKVEY<br>HLLSPY<br>VSPR | 4.53 | 1,948.04 |
| ATP | 6006 | PREDIC TED: 52<br>similar to transferri n receptor                                                         | gi 1198796 | 85,420.40 | 100.00% | 7 | 8 | 9 | 0.09% | 9.75% | LAADEE<br>ENVDSN<br>MR   | 3.01 | 1,608.68 |
| ATP | 6006 | PREDIC TED: 52<br>similar to transferri n receptor                                                         | gi 1198796 | 85,420.40 | 100.00% | 7 | 8 | 9 | 0.09% | 9.75% | MLNENS<br>YVPR           | 2.11 | 1,238.58 |
| ATP | 6006 | PREDIC TED: 52<br>similar to transferri n receptor                                                         | gi 1198796 | 85,420.40 | 100.00% | 7 | 8 | 9 | 0.09% | 9.75% | SSVGTSL<br>LLTLAR        | 2.51 | 1,317.77 |
| ATP | 6006 | PREDIC TED: 52<br>similar to transferri n receptor                                                         | gi 1198796 | 85,420.40 | 100.00% | 7 | 8 | 9 | 0.09% | 9.75% | VEYHLL<br>SPYVSPR        | 3.71 | 1,559.82 |
| ATP | 6006 | PREDIC TED: 52<br>similar to transferri n receptor                                                         | gi 1198796 | 85,420.40 | 100.00% | 7 | 8 | 9 | 0.09% | 9.75% | VSASPLL<br>YSLIEK        | 4.52 | 1,419.81 |



|     |      |                                                                                         |                                                              |           |         |   |   |   |       |        |                             |          |
|-----|------|-----------------------------------------------------------------------------------------|--------------------------------------------------------------|-----------|---------|---|---|---|-------|--------|-----------------------------|----------|
| ATP | 6006 | Leucine rich repeat containing family, member A                                         | gi 115304767,gi 116003833                                    | 93,997.70 | 100.00% | 3 | 3 | 3 | 0.03% | 3.58%  | FIVIDGL 2.4 R               | 932.5565 |
| ATP | 6006 | Leucine rich repeat containing family, member A                                         | gi 115304767,gi 116003833                                    | 93,997.70 | 100.00% | 3 | 3 | 3 | 0.03% | 3.58%  | IEAPALA 2.7 FLR             | 1,100.65 |
| ATP | 6006 | Leucine rich repeat containing family, member A                                         | gi 115304767,gi 116003833                                    | 93,997.70 | 100.00% | 3 | 3 | 3 | 0.03% | 3.58%  | MANLTE 2.89 LELIR           | 1,318.70 |
| ATP | 6006 | Caveolin 2                                                                              | gi 157279219,gi 38322700,gi 51512145,gi 56119130,gi 66774044 | 18,142.30 | 100.00% | 3 | 3 | 6 | 0.06% | 27.20% | ADVQLF 2.91 MDDDSY SR       | 1,677.71 |
| ATP | 6006 | Caveolin 2                                                                              | gi 157279219,gi 38322700,gi 51512145,gi 56119130,gi 66774044 | 18,142.30 | 100.00% | 3 | 3 | 6 | 0.06% | 27.20% | SFSSVSL 3.98 QLSHD          | 1,306.63 |
| ATP | 6006 | Caveolin 2                                                                              | gi 157279219,gi 38322700,gi 51512145,gi 56119130,gi 66774044 | 18,142.30 | 100.00% | 3 | 3 | 6 | 0.06% | 27.20% | VG FEDVI 2.63 AEPVST HSF DK | 1,976.96 |
| ATP | 6006 | guanine nucleotide binding protein (G protein), alpha inhibiting activity polypeptide 3 | gi 146231724,gi 77736299                                     | 40,519.40 | 99.80%  | 2 | 2 | 2 | 0.02% | 10.20% | ISQTNYI 2.83 PTQQDV LR      | 1,775.93 |
| ATP | 6006 | guanine nucleotide binding protein (G protein), alpha inhibiting activity polypeptide 3 | gi 146231724,gi 77736299                                     | 40,519.40 | 99.80%  | 2 | 2 | 2 | 0.02% | 10.20% | LKIDFGE 3.83 AAR            | 1,119.62 |

|     |      |                                                                                                                                                                                                                           |                                                         |           |         |   |   |   |       |        |                                      |      |          |
|-----|------|---------------------------------------------------------------------------------------------------------------------------------------------------------------------------------------------------------------------------|---------------------------------------------------------|-----------|---------|---|---|---|-------|--------|--------------------------------------|------|----------|
| ATP | 6006 | guanine<br>nucleotide<br>binding<br>protein<br>(G<br>protein),<br>alpha<br>inhibiting<br>activity<br>polypeptide<br>3                                                                                                     | gi 1462317<br>24,gi 77736                               | 40,519.40 | 99.80%  | 2 | 2 | 2 | 0.02% | 10.20% | LLLLGA<br>GESGK                      | 3.7  | 1,057.63 |
| ATP | 6006 | Chromosome<br>9<br>open<br>reading<br>frame 46<br>ortholog                                                                                                                                                                | gi 7435452<br>9,gi 777357                               | 17,091.30 | 99.80%  | 2 | 2 | 2 | 0.02% | 17.00% | GMITFES<br>LEK                       | 3.28 | 1,170.57 |
| ATP | 6006 | Chromosome<br>9<br>open<br>reading<br>frame 46<br>ortholog                                                                                                                                                                | gi 7435452<br>9,gi 777357                               | 17,091.30 | 99.80%  | 2 | 2 | 2 | 0.02% | 17.00% | MKGEAE<br>NILETEK<br>SK              | 3.66 | 1,722.86 |
| ATP | 6006 | RecName:<br>Full=Guanine<br>nucleotide-<br>binding<br>protein<br>subunit<br>alpha-11;<br>Short=G-<br>protein<br>subunit<br>alpha-11;<br>Short=G<br>alpha-11;<br>AltName:<br>Full=G-<br>protein<br>subunit<br>GL2<br>alpha | gi 1169852,<br>gi 1337774<br>82,gi 21756<br>8,gi 278057 | 41,360.90 | 100.00% | 5 | 5 | 6 | 0.06% | 24.90% | DLLEDKI<br>LHSHLV<br>DYFPEF<br>DGPQR | 2.07 | 2,883.43 |



|     |      |                                                                                                                                                                                                                                   |                                                                           |         |   |   |   |       |        |                                   |      |          |
|-----|------|-----------------------------------------------------------------------------------------------------------------------------------------------------------------------------------------------------------------------------------|---------------------------------------------------------------------------|---------|---|---|---|-------|--------|-----------------------------------|------|----------|
| ATP | 6006 | RecName<br>:<br>Full=Gua<br>nine<br>nucleotid<br>e-binding<br>protein<br>subunit<br>alpha-11;<br>Short=G-<br>protein<br>subunit<br>alpha-11;<br>Short=G<br>alpha-11;<br>AltName:<br>Full=G-<br>protein<br>subunit<br>GL2<br>alpha | gi 1169852, 41,360.90<br>gi 1337774<br>82,gi 21756<br>8,gi 278057<br>95   | 100.00% | 5 | 5 | 6 | 0.06% | 24.90% | LLLLGT<br>GESGK                   | 3.43 | 1,087.64 |
| ATP | 6006 | RecName<br>:<br>Full=Gua<br>nine<br>nucleotid<br>e-binding<br>protein<br>subunit<br>alpha-11;<br>Short=G-<br>protein<br>subunit<br>alpha-11;<br>Short=G<br>alpha-11;<br>AltName:<br>Full=G-<br>protein<br>subunit<br>GL2<br>alpha | gi 1169852, 41,360.90<br>gi 1337774<br>82,gi 21756<br>8,gi 278057<br>95   | 100.00% | 5 | 5 | 6 | 0.06% | 24.90% | VRVPTT<br>GIIEYPF<br>DLENIIF<br>R | 5.2  | 2,492.36 |
| ATP | 6006 | mitochon<br>drial<br>NADH:u<br>biquinon<br>e<br>oxidored<br>uctase<br>B16.6<br>subunit                                                                                                                                            | gi 1586461 16,655.90<br>6,gi 201390<br>62,gi 28603<br>804,gi 7426<br>8330 | 100.00% | 3 | 4 | 4 | 0.04% | 28.50% | IALMPLL<br>QAEKDR<br>R            | 2.28 | 1,669.94 |
| ATP | 6006 | mitochon<br>drial<br>NADH:u<br>biquinon<br>e<br>oxidored<br>uctase<br>B16.6<br>subunit                                                                                                                                            | gi 1586461 16,655.90<br>6,gi 201390<br>62,gi 28603<br>804,gi 7426<br>8330 | 100.00% | 3 | 4 | 4 | 0.04% | 28.50% | LQIEDFE<br>AR                     | 2.58 | 1,120.56 |

|     |      |                                                            |                                                                 |           |         |   |    |    |       |        |                                                                      |          |
|-----|------|------------------------------------------------------------|-----------------------------------------------------------------|-----------|---------|---|----|----|-------|--------|----------------------------------------------------------------------|----------|
| ATP | 6006 | mitochondrial NADH:ubiquinone oxidoreductase B16.6 subunit | gi 15864616,gi 20139062,gi 28603804,gi 74268330                 | 16,655.90 | 100.00% | 3 | 4  | 4  | 0.04% | 28.50% | VKQDMP 4.29<br>PVGGYG<br>PIDYKR                                      | 2,036.03 |
| ATP | 6006 | basigin                                                    | gi 115496127,gi 120419551,gi 154425710,gi 156713141,gi 73587049 | 29,754.80 | 100.00% | 4 | 4  | 4  | 0.04% | 21.80% | FFVVSSE 2.95<br>SR                                                   | 1,057.53 |
| ATP | 6006 | basigin                                                    | gi 115496127,gi 120419551,gi 154425710,gi 156713141,gi 73587049 | 29,754.80 | 100.00% | 4 | 4  | 4  | 0.04% | 21.80% | RKPDEV 5.11<br>LDDEDI<br>GSAPLK                                      | 1,997.02 |
| ATP | 6006 | basigin                                                    | gi 115496127,gi 120419551,gi 154425710,gi 156713141,gi 73587049 | 29,754.80 | 100.00% | 4 | 4  | 4  | 0.04% | 21.80% | TELHIPN 3.06<br>VDLK                                                 | 1,278.71 |
| ATP | 6006 | basigin                                                    | gi 115496127,gi 120419551,gi 154425710,gi 156713141,gi 73587049 | 29,754.80 | 100.00% | 4 | 4  | 4  | 0.04% | 21.80% | VLKEDA 2.63<br>LPDLKT<br>EYEVDS<br>EDR                               | 2,464.21 |
| ATP | 6006 | Tubulin, beta 2C                                           | gi 75773583,gi 77736271                                         | 49,812.70 | 100.00% | 9 | 10 | 11 | 0.12% | 33.30% | AVLVLDL 3.53<br>EPGTMD<br>SVR                                        | 1,617.82 |
| ATP | 6006 | Tubulin, beta 2C                                           | gi 75773583,gi 77736271                                         | 49,812.70 | 100.00% | 9 | 10 | 11 | 0.12% | 33.30% | GHYTEG 3.22<br>AELVDS<br>VLDVVR<br>K                                 | 2,087.08 |
| ATP | 6006 | Tubulin, beta 2C                                           | gi 75773583,gi 77736271                                         | 49,812.70 | 100.00% | 9 | 10 | 11 | 0.12% | 33.30% | IMNTFSV 3<br>VPSPK                                                   | 1,335.70 |
| ATP | 6006 | Tubulin, beta 2C                                           | gi 75773583,gi 77736271                                         | 49,812.70 | 100.00% | 9 | 10 | 11 | 0.12% | 33.30% | INVYYN 3.35<br>EATGGK                                                | 1,328.65 |
| ATP | 6006 | Tubulin, beta 2C                                           | gi 75773583,gi 77736271                                         | 49,812.70 | 100.00% | 9 | 10 | 11 | 0.12% | 33.30% | LAVNMV 3.84<br>PFPR                                                  | 1,159.63 |
| ATP | 6006 | Tubulin, beta 2C                                           | gi 75773583,gi 77736271                                         | 49,812.70 | 100.00% | 9 | 10 | 11 | 0.12% | 33.30% | LHFFMP 3.49<br>GFAPLTS<br>R                                          | 1,636.83 |
| ATP | 6006 | Tubulin, beta 2C                                           | gi 75773583,gi 77736271                                         | 49,812.70 | 100.00% | 9 | 10 | 11 | 0.12% | 33.30% | MSATFIG 2.81<br>NSTAIQE<br>LFKR                                      | 2,030.04 |
| ATP | 6006 | Tubulin, beta 2C                                           | gi 75773583,gi 77736271                                         | 49,812.70 | 100.00% | 9 | 10 | 11 | 0.12% | 33.30% | VSDTVV 3.15<br>EPYNAT<br>LSVHQL<br>VENTDE<br>TYCIDNE<br>ALYDICF<br>R | 4,479.06 |
| ATP | 6006 | Tubulin, beta 2C                                           | gi 75773583,gi 77736271                                         | 49,812.70 | 100.00% | 9 | 10 | 11 | 0.12% | 33.30% | YLTVA 2.35<br>VFR                                                    | 1,039.59 |

|     |      |                                                                                                                                                                                                                                                                                                                           |           |         |   |   |   |       |        |                                        |          |
|-----|------|---------------------------------------------------------------------------------------------------------------------------------------------------------------------------------------------------------------------------------------------------------------------------------------------------------------------------|-----------|---------|---|---|---|-------|--------|----------------------------------------|----------|
| ATP | 6006 | RecName gi 1098925<br>: 06.gi 73587<br>Full=LA 265.gi 7773<br>G1 6279<br>longevity<br>assurance<br>homolog<br>2                                                                                                                                                                                                           | 44,887.70 | 100.00% | 3 | 3 | 4 | 0.04% | 12.10% | LRAPPNP 3.42<br>TLEHFY<br>MTSGKQ<br>PK | 2,428.24 |
| ATP | 6006 | RecName gi 1098925<br>: 06.gi 73587<br>Full=LA 265.gi 7773<br>G1 6279<br>longevity<br>assurance<br>homolog<br>2                                                                                                                                                                                                           | 44,887.70 | 100.00% | 3 | 3 | 4 | 0.04% | 12.10% | NRPLAN 3.71<br>GHPIINN<br>NHR          | 1,836.97 |
| ATP | 6006 | RecName gi 1098925<br>: 06.gi 73587<br>Full=LA 265.gi 7773<br>G1 6279<br>longevity<br>assurance<br>homolog<br>2                                                                                                                                                                                                           | 44,887.70 | 100.00% | 3 | 3 | 4 | 0.04% | 12.10% | QADVEL 2.09<br>LSR                     | 1,030.55 |
| ATP | 6006 | RecName gi 2152742<br>: 38.gi 27806<br>Full=Pept 469.gi 5292<br>idyl- 42.gi 59858<br>prolyl cis- 297.gi 7426<br>trans 8324<br>isomerase<br>B;<br>Short=PP<br>Iase;<br>Short=Ro<br>tamase;<br>AltName:<br>Full=Cyc<br>lophilin<br>B;<br>AltName:<br>Full=S-<br>cyclophili<br>n;<br>Short=SC<br>YLP;<br>Flags:<br>Precursor | 23,726.00 | 99.80%  | 2 | 2 | 2 | 0.02% | 12.50% | TVDNFV 3.54<br>ALATGE<br>K             | 1,364.71 |

|     |      |                                                                                                                                                                                                                                                                                                       |                                                                                |           |         |   |   |   |       |        |                                       |          |
|-----|------|-------------------------------------------------------------------------------------------------------------------------------------------------------------------------------------------------------------------------------------------------------------------------------------------------------|--------------------------------------------------------------------------------|-----------|---------|---|---|---|-------|--------|---------------------------------------|----------|
| ATP | 6006 | RecName<br>:<br>Full=Pept<br>idyl-<br>prolyl cis-<br>trans<br>isomerase<br>B;<br>Short=PP<br>Iase;<br>Short=Ro<br>tamase;<br>AltName:<br>Full=Cyc<br>lophilin<br>B;<br>AltName:<br>Full=S-<br>cyclophili<br>n;<br>Short=SC<br>YLP;<br>Flags:<br>Precursor                                             | gi 2152742<br>38,gi 27806<br>469,gi 5292<br>42,gi 59858<br>297,gi 7426<br>8324 | 23,726.00 | 99.80%  | 2 | 2 | 2 | 0.02% | 12.50% | VIKDFMI 3.77<br>QGGDFT<br>R           | 1,642.83 |
| ATP | 6006 | FLOT2<br>protein                                                                                                                                                                                                                                                                                      | gi 1515536<br>23,gi 16445<br>2939                                              | 46,976.90 | 100.00% | 4 | 4 | 4 | 0.04% | 14.00% | LLAELPA 2.22<br>SVHALT<br>GVDLSK      | 1,934.10 |
| ATP | 6006 | FLOT2<br>protein                                                                                                                                                                                                                                                                                      | gi 1515536<br>23,gi 16445<br>2939                                              | 46,976.90 | 100.00% | 4 | 4 | 4 | 0.04% | 14.00% | MALVLD 3.67<br>ALPR                   | 1,114.63 |
| ATP | 6006 | FLOT2<br>protein                                                                                                                                                                                                                                                                                      | gi 1515536<br>23,gi 16445<br>2939                                              | 46,976.90 | 100.00% | 4 | 4 | 4 | 0.04% | 14.00% | QVLLAQ 2.92<br>AEA EK                 | 1,199.66 |
| ATP | 6006 | FLOT2<br>protein                                                                                                                                                                                                                                                                                      | gi 1515536<br>23,gi 16445<br>2939                                              | 46,976.90 | 100.00% | 4 | 4 | 4 | 0.04% | 14.00% | SILGTLT 3.07<br>VEQIYQ<br>DRDQFA<br>K | 2,325.21 |
| ATP | 6006 | PREDIC<br>TED:<br>similar to<br>1-<br>acylglyce<br>rophosph<br>ocholine<br>O-<br>acyltransf<br>erase 1<br>(Lung-<br>type acyl-<br>CoA:lyso<br>phosphati<br>dylcholin<br>e<br>acyltransf<br>erase 1)<br>(Lysopho<br>sphatidyl<br>choline<br>acyltransf<br>erase 1)<br>(Acyltran<br>sferase-<br>like 2) | gi 1946764<br>22                                                               | 54,069.40 | 99.80%  | 2 | 2 | 2 | 0.02% | 5.98%  | MFGSQD 2.42<br>GSVEEH<br>ALSSILK      | 2,050.98 |

|     |      |                                                                                                                                                                                                                                                                                            |                                                                                                                                                                                    |            |         |   |   |   |       |        |                                      |      |          |
|-----|------|--------------------------------------------------------------------------------------------------------------------------------------------------------------------------------------------------------------------------------------------------------------------------------------------|------------------------------------------------------------------------------------------------------------------------------------------------------------------------------------|------------|---------|---|---|---|-------|--------|--------------------------------------|------|----------|
| ATP | 6006 | PREDIC TED:<br>similar to<br>1-acylglyce<br>rophosph<br>ocholine<br>O-acyltransf<br>erase 1<br>(Lung-<br>type acyl-<br>CoA:lyso<br>phosphati<br>dylcholin<br>e<br>acyltransf<br>erase 1)<br>(Lysopho<br>sphatidyl<br>choline<br>acyltransf<br>erase 1)<br>(Acyltran<br>sferase-<br>like 2) | gi 1946764<br>22                                                                                                                                                                   | 54,069.40  | 99.80%  | 2 | 2 | 2 | 0.02% | 5.98%  | TLDTIQL<br>AFK                       | 2.7  | 1,149.65 |
| ATP | 6006 | Chain C,<br>Subcomp<br>lex Of<br>The<br>Stator Of<br>Bovine<br>Mitochon<br>drial Atp<br>Synthase                                                                                                                                                                                           | gi 1105910<br>28,gi 11059<br>1031,gi 114<br>687,gi 1630<br>36,gi 27807<br>291,gi 5567<br>0489,gi 735<br>86602                                                                      | 12,514.70  | 99.90%  | 2 | 2 | 3 | 0.03% | 22.20% | QTSGGP<br>VDAGPE<br>YQQDL<br>RELFK   | 3.42 | 2,550.21 |
| ATP | 6006 | Chain C,<br>Subcomp<br>lex Of<br>The<br>Stator Of<br>Bovine<br>Mitochon<br>drial Atp<br>Synthase                                                                                                                                                                                           | gi 1105910<br>28,gi 11059<br>1031,gi 114<br>687,gi 1630<br>36,gi 27807<br>291,gi 5567<br>0489,gi 735<br>86602                                                                      | 12,514.70  | 99.90%  | 2 | 2 | 3 | 0.03% | 22.20% | RQTSGG<br>PVDAGP<br>EYQQDL<br>DRELFK | 3.44 | 2,706.31 |
| ATP | 6006 | RecName<br>:<br>Full=Clat<br>hrin<br>heavy<br>chain 1                                                                                                                                                                                                                                      | gi 1705915,<br>gi 2780668<br>9,gi 565545<br>48,gi 56554<br>549,gi 5655<br>4550,gi 565<br>54551,gi 56<br>554552,gi 5<br>6554553,gi <br>56554554,g<br>i 56554555,<br>gi 5655455<br>6 | 186,919.60 | 100.00% | 5 | 6 | 6 | 0.06% | 5.34%  | AFMTAD<br>LPNELIE<br>LLEK            | 3.72 | 1,963.01 |



|     |      |                                                       |                                                                                                                                                                                    |            |         |   |   |   |       |       |                                      |      |          |
|-----|------|-------------------------------------------------------|------------------------------------------------------------------------------------------------------------------------------------------------------------------------------------|------------|---------|---|---|---|-------|-------|--------------------------------------|------|----------|
| ATP | 6006 | RecName<br>:<br>Full=Clat<br>hrin<br>heavy<br>chain 1 | gi 1705915,<br>gi 2780668<br>9,gi 565545<br>48,gi 56554<br>549,gi 5655<br>4550,gi 565<br>54551,gi 56<br>554552,gi 5<br>6554553,gi <br>56554554,g<br>i 56554555,<br>gi 5655455<br>6 | 186,919.60 | 100.00% | 5 | 6 | 6 | 0.06% | 5.34% | ISGETIF<br>VTAPHE<br>ATAGIIG<br>VNR  | 3.9  | 2,353.25 |
| ATP | 6006 | RecName<br>:<br>Full=Clat<br>hrin<br>heavy<br>chain 1 | gi 1705915,<br>gi 2780668<br>9,gi 565545<br>48,gi 56554<br>549,gi 5655<br>4550,gi 565<br>54551,gi 56<br>554552,gi 5<br>6554553,gi <br>56554554,g<br>i 56554555,<br>gi 5655455<br>6 | 186,919.60 | 100.00% | 5 | 6 | 6 | 0.06% | 5.34% | KFDVNT<br>SAVQVLI<br>EHIGNL<br>DR    | 4.51 | 2,368.26 |
| ATP | 6006 | RecName<br>:<br>Full=Clat<br>hrin<br>heavy<br>chain 1 | gi 1705915,<br>gi 2780668<br>9,gi 565545<br>48,gi 56554<br>549,gi 5655<br>4550,gi 565<br>54551,gi 56<br>554552,gi 5<br>6554553,gi <br>56554554,g<br>i 56554555,<br>gi 5655455<br>6 | 186,919.60 | 100.00% | 5 | 6 | 6 | 0.06% | 5.34% | LLYNNV<br>SNFGR                      | 3.64 | 1,296.67 |
| ATP | 6006 | RecName<br>:<br>Full=Clat<br>hrin<br>heavy<br>chain 1 | gi 1705915,<br>gi 2780668<br>9,gi 565545<br>48,gi 56554<br>549,gi 5655<br>4550,gi 565<br>54551,gi 56<br>554552,gi 5<br>6554553,gi <br>56554554,g<br>i 56554555,<br>gi 5655455<br>6 | 186,919.60 | 100.00% | 5 | 6 | 6 | 0.06% | 5.34% | RPISADS<br>AIMNPA<br>SK              | 3.03 | 1,573.80 |
| ATP | 6006 | coiled-<br>coil<br>domain<br>containin<br>g 47        | gi 1462318<br>52,gi 73586<br>661,gi 7836<br>9308,gi 970<br>45772                                                                                                                   | 55,725.10  | 99.80%  | 2 | 2 | 2 | 0.02% | 6.83% | ELLESNF<br>TLVGDD<br>GTNKEA<br>TSTGK | 3.15 | 2,526.22 |
| ATP | 6006 | coiled-<br>coil<br>domain<br>containin<br>g 47        | gi 1462318<br>52,gi 73586<br>661,gi 7836<br>9308,gi 970<br>45772                                                                                                                   | 55,725.10  | 99.80%  | 2 | 2 | 2 | 0.02% | 6.83% | QDLLNV<br>LAR                        | 2.18 | 1,041.61 |

|     |      |                                                                                  |                                               |           |         |   |    |    |       |        |                                         |          |
|-----|------|----------------------------------------------------------------------------------|-----------------------------------------------|-----------|---------|---|----|----|-------|--------|-----------------------------------------|----------|
| ATP | 6006 | hydroxyst<br>eroid (17-<br>beta)<br>dehydrog<br>enase 11                         | gi 1140528<br>gi 86438<br>493                 | 35,077.20 | 100.00% | 5 | 7  | 7  | 0.07% | 17.70% | ALTEELS 3.2<br>ALKR                     | 1,230.71 |
| ATP | 6006 | hydroxyst<br>eroid (17-<br>beta)<br>dehydrog<br>enase 11                         | gi 1140528<br>gi 86438<br>493                 | 35,077.20 | 100.00% | 5 | 7  | 7  | 0.07% | 17.70% | FDAVIG 2.26<br>YK                       | 912.4826 |
| ATP | 6006 | hydroxyst<br>eroid (17-<br>beta)<br>dehydrog<br>enase 11                         | gi 1140528<br>gi 86438<br>493                 | 35,077.20 | 100.00% | 5 | 7  | 7  | 0.07% | 17.70% | KSVTGEI 4.87<br>VLITGA<br>GHGIGR        | 1,865.06 |
| ATP | 6006 | hydroxyst<br>eroid (17-<br>beta)<br>dehydrog<br>enase 11                         | gi 1140528<br>gi 86438<br>493                 | 35,077.20 | 100.00% | 5 | 7  | 7  | 0.07% | 17.70% | NPSTSLG 4.38<br>PTLEPEE<br>VVNK         | 1,910.97 |
| ATP | 6006 | hydroxyst<br>eroid (17-<br>beta)<br>dehydrog<br>enase 11                         | gi 1140528<br>gi 86438<br>493                 | 35,077.20 | 100.00% | 5 | 7  | 7  | 0.07% | 17.70% | SVTGEIV 3.51<br>LITGAG<br>HGIGR         | 1,736.97 |
| ATP | 6006 | Ribosom<br>al protein<br>S3                                                      | gi 7426822<br>gi 774042<br>90,gi 91207<br>641 | 26,670.50 | 100.00% | 4 | 4  | 4  | 0.04% | 24.70% | AELNEFL 2.86<br>TR                      | 1,092.57 |
| ATP | 6006 | Ribosom<br>al protein<br>S3                                                      | gi 7426822<br>gi 774042<br>90,gi 91207<br>641 | 26,670.50 | 100.00% | 4 | 4  | 4  | 0.04% | 24.70% | ELAEDG 3.29<br>YSGVEV<br>R              | 1,423.67 |
| ATP | 6006 | Ribosom<br>al protein<br>S3                                                      | gi 7426822<br>gi 774042<br>90,gi 91207<br>641 | 26,670.50 | 100.00% | 4 | 4  | 4  | 0.04% | 24.70% | FVDGLM 4.66<br>IHSGDPV<br>NYYVDT<br>AVR | 2,484.19 |
| ATP | 6006 | Ribosom<br>al protein<br>S3                                                      | gi 7426822<br>gi 774042<br>90,gi 91207<br>641 | 26,670.50 | 100.00% | 4 | 4  | 4  | 0.04% | 24.70% | GKKPEP 2.93<br>PAMPQP<br>VPTA           | 1,589.80 |
| ATP | 6006 | Leucine<br>zipper-EF<br>hand<br>containin<br>g<br>transmem<br>brane<br>protein 1 | gi 1113086<br>gi 11549<br>7920                | 81,801.70 | 100.00% | 2 | 2  | 2  | 0.02% | 4.10%  | FLQDTIE 3.59<br>EMALK                   | 1,453.72 |
| ATP | 6006 | Leucine<br>zipper-EF<br>hand<br>containin<br>g<br>transmem<br>brane<br>protein 1 | gi 1113086<br>gi 11549<br>7920                | 81,801.70 | 100.00% | 2 | 2  | 2  | 0.02% | 4.10%  | KLEEGG 2.8<br>PVYSPP<br>AQAAVR          | 1,868.99 |
| ATP | 6006 | voltage-<br>dependen<br>t anion<br>channel 1                                     | gi 8810220,<br>gi 9011186<br>3                | 30,723.80 | 100.00% | 9 | 13 | 23 | 0.24% | 38.90% | GLKLTf 3.67<br>DSSFSPN<br>TGKK          | 1,826.96 |
| ATP | 6006 | voltage-<br>dependen<br>t anion<br>channel 1                                     | gi 8810220,<br>gi 9011186<br>3                | 30,723.80 | 100.00% | 9 | 13 | 23 | 0.24% | 38.90% | LTFDSSF 3.78<br>SPNTGK                  | 1,400.67 |

|     |      |                                   |                                                                                         |           |         |   |    |    |       |        |                                          |          |
|-----|------|-----------------------------------|-----------------------------------------------------------------------------------------|-----------|---------|---|----|----|-------|--------|------------------------------------------|----------|
| ATP | 6006 | voltage-dependent anion channel 1 | gi8810220, gi9011186                                                                    | 30,723.80 | 100.00% | 9 | 13 | 23 | 0.24% | 38.90% | LTFDSSF 2.26<br>SPNTGK<br>K              | 1,528.76 |
| ATP | 6006 | voltage-dependent anion channel 1 | gi8810220, gi9011186                                                                    | 30,723.80 | 100.00% | 9 | 13 | 23 | 0.24% | 38.90% | LTLSALL 3.09<br>DGK                      | 1,030.61 |
| ATP | 6006 | voltage-dependent anion channel 1 | gi8810220, gi9011186                                                                    | 30,723.80 | 100.00% | 9 | 13 | 23 | 0.24% | 38.90% | LTLSALL 3.39<br>DGKNVN<br>AGGHK          | 1,808.00 |
| ATP | 6006 | voltage-dependent anion channel 1 | gi8810220, gi9011186                                                                    | 30,723.80 | 100.00% | 9 | 13 | 23 | 0.24% | 38.90% | TDEFQL 3.42<br>HTNVND<br>GTEFGG<br>SIYQK | 2,600.19 |
| ATP | 6006 | voltage-dependent anion channel 1 | gi8810220, gi9011186                                                                    | 30,723.80 | 100.00% | 9 | 13 | 23 | 0.24% | 38.90% | TKSENG 4.02<br>LEFTSSG<br>SANTET<br>TK   | 2,189.02 |
| ATP | 6006 | voltage-dependent anion channel 1 | gi8810220, gi9011186                                                                    | 30,723.80 | 100.00% | 9 | 13 | 23 | 0.24% | 38.90% | VNSSLI 4.67<br>GLGYTQ<br>TLKPGIK         | 2,103.18 |
| ATP | 6006 | voltage-dependent anion channel 1 | gi8810220, gi9011186                                                                    | 30,723.80 | 100.00% | 9 | 13 | 23 | 0.24% | 38.90% | VTQSNF 3.57<br>AVGYK                     | 1,213.62 |
| ATP | 6006 | voltage-dependent anion channel 2 | gi5985840, gi1,gi621771, gi48,gi73586, gi695,gi8574, gi295,gi8810, gi222,gi9011, gi1864 | 31,602.50 | 100.00% | 8 | 10 | 19 | 0.20% | 31.30% | DIFNKGK 3.55<br>GFGLVK                   | 1,441.78 |
| ATP | 6006 | voltage-dependent anion channel 2 | gi5985840, gi1,gi621771, gi48,gi73586, gi695,gi8574, gi295,gi8810, gi222,gi9011, gi1864 | 31,602.50 | 100.00% | 8 | 10 | 19 | 0.20% | 31.30% | GFGFGL 2.04<br>VK                        | 824.4666 |
| ATP | 6006 | voltage-dependent anion channel 2 | gi5985840, gi1,gi621771, gi48,gi73586, gi695,gi8574, gi295,gi8810, gi222,gi9011, gi1864 | 31,602.50 | 100.00% | 8 | 10 | 19 | 0.20% | 31.30% | LTFDITF 3.72<br>SPNTGK                   | 1,428.70 |
| ATP | 6006 | voltage-dependent anion channel 2 | gi5985840, gi1,gi621771, gi48,gi73586, gi695,gi8574, gi295,gi8810, gi222,gi9011, gi1864 | 31,602.50 | 100.00% | 8 | 10 | 19 | 0.20% | 31.30% | LTFDITF 2.54<br>SPNTGK<br>K              | 1,556.80 |
| ATP | 6006 | voltage-dependent anion channel 2 | gi5985840, gi1,gi621771, gi48,gi73586, gi695,gi8574, gi295,gi8810, gi222,gi9011, gi1864 | 31,602.50 | 100.00% | 8 | 10 | 19 | 0.20% | 31.30% | LTLSAL 3.3<br>VDGK                       | 1,016.60 |
| ATP | 6006 | voltage-dependent anion channel 2 | gi5985840, gi1,gi621771, gi48,gi73586, gi695,gi8574, gi295,gi8810, gi222,gi9011, gi1864 | 31,602.50 | 100.00% | 8 | 10 | 19 | 0.20% | 31.30% | TGDFQL 4.21<br>HTNVND<br>GTEFGG<br>SIYQK | 2,528.17 |

|     |      |                                                      |                                                            |            |         |   |    |    |       |        |                                                             |          |
|-----|------|------------------------------------------------------|------------------------------------------------------------|------------|---------|---|----|----|-------|--------|-------------------------------------------------------------|----------|
| ATP | 6006 | voltage-dependent anion channel 2                    | gi 59858401,gi 62177148,gi 73586695,gi 8810222,gi 90111864 | 31,602.50  | 100.00% | 8 | 10 | 19 | 0.20% | 31.30% | VNSSLI 5.45<br>GVGYTQ<br>TLRPGV<br>K                        | 2,103.16 |
| ATP | 6006 | voltage-dependent anion channel 2                    | gi 59858401,gi 62177148,gi 73586695,gi 8810222,gi 90111864 | 31,602.50  | 100.00% | 8 | 10 | 19 | 0.20% | 31.30% | YQLDPT 3.51<br>ASISAK                                       | 1,293.67 |
| ATP | 6006 | endothelial cell-specific molecule 2                 | gi 114053335,gi 86438024                                   | 20,621.00  | 99.80%  | 2 | 3  | 5  | 0.05% | 13.20% | ESEDPQ 4.05<br>KPGSSG<br>LSESGT<br>ANGEK                    | 2,378.06 |
| ATP | 6006 | endothelial cell-specific molecule 2                 | gi 114053335,gi 86438024                                   | 20,621.00  | 99.80%  | 2 | 3  | 5  | 0.05% | 13.20% | NKESED 2.19<br>PQKPGS<br>SGLSESG<br>STANGE<br>K             | 2,620.20 |
| ATP | 6006 | PREDICTED: similar to leucyl/cystinyl aminopeptidase | gi 119895933                                               | 119,380.70 | 100.00% | 4 | 5  | 5  | 0.05% | 5.44%  | GFPLVT 2.08<br>VQR                                          | 1,016.59 |
| ATP | 6006 | PREDICTED: similar to leucyl/cystinyl aminopeptidase | gi 119895933                                               | 119,380.70 | 100.00% | 4 | 5  | 5  | 0.05% | 5.44%  | GLGEHE 4.5<br>LDEDEE<br>DYESSA<br>K                         | 2,151.88 |
| ATP | 6006 | PREDICTED: similar to leucyl/cystinyl aminopeptidase | gi 119895933                                               | 119,380.70 | 100.00% | 4 | 5  | 5  | 0.05% | 5.44%  | IFGELSS 3.44<br>YEDFLD<br>AR                                | 1,761.83 |
| ATP | 6006 | PREDICTED: similar to leucyl/cystinyl aminopeptidase | gi 119895933                                               | 119,380.70 | 100.00% | 4 | 5  | 5  | 0.05% | 5.44%  | KYFAAT 3.31<br>QFEPLA<br>AR                                 | 1,612.85 |
| ATP | 6006 | CYB5B protein                                        | gi 158455068,gi 76640228                                   | 26,782.70  | 99.80%  | 2 | 2  | 2  | 0.02% | 22.40% | FLDEHP 4.09<br>GGEEVL<br>MEQAGG<br>DATESFE<br>DVGHSS<br>DAR | 3,634.55 |
| ATP | 6006 | CYB5B protein                                        | gi 158455068,gi 76640228                                   | 26,782.70  | 99.80%  | 2 | 2  | 2  | 0.02% | 22.40% | QYYIGD 2.48<br>VHPNDL<br>KPGGGS<br>K                        | 2,045.01 |

|     |      |                                                                                   |                                                                                           |           |         |   |   |   |       |        |                                                       |      |          |
|-----|------|-----------------------------------------------------------------------------------|-------------------------------------------------------------------------------------------|-----------|---------|---|---|---|-------|--------|-------------------------------------------------------|------|----------|
| ATP | 6006 | Chain B, Crystal Structure Of Bovine Heart Mitochondrial Bcl With Jg144 Inhibitor | gi 114793902,gi 27807143,gi 300,gi 401248,gi 59858351,gi 73586962,gi 82407277,gi 82407288 | 46,506.00 | 100.00% | 3 | 3 | 3 | 0.03% | 9.11%  | MALIGL<br>GVSHPV<br>LK                                | 2.18 | 1,450.85 |
| ATP | 6006 | Chain B, Crystal Structure Of Bovine Heart Mitochondrial Bcl With Jg144 Inhibitor | gi 114793902,gi 27807143,gi 300,gi 401248,gi 59858351,gi 73586962,gi 82407277,gi 82407288 | 46,506.00 | 100.00% | 3 | 3 | 3 | 0.03% | 9.11%  | QVAEQF<br>LNIR                                        | 2.86 | 1,217.66 |
| ATP | 6006 | Chain B, Crystal Structure Of Bovine Heart Mitochondrial Bcl With Jg144 Inhibitor | gi 114793902,gi 27807143,gi 300,gi 401248,gi 59858351,gi 73586962,gi 82407277,gi 82407288 | 46,506.00 | 100.00% | 3 | 3 | 3 | 0.03% | 9.11%  | TIAQGN<br>LSNPDV<br>QAAK                              | 3.98 | 1,626.84 |
| ATP | 6006 | Flotillin 1                                                                       | gi 115305033,gi 116004001,gi 118572320,gi 75775078                                        | 47,334.80 | 100.00% | 6 | 6 | 7 | 0.07% | 21.50% | AQQVAV<br>QEQEIAR                                     | 3.68 | 1,469.77 |
| ATP | 6006 | Flotillin 1                                                                       | gi 115305033,gi 116004001,gi 118572320,gi 75775078                                        | 47,334.80 | 100.00% | 6 | 6 | 7 | 0.07% | 21.50% | ITLVSSG<br>SGAMGA<br>AK                               | 4.81 | 1,365.70 |
| ATP | 6006 | Flotillin 1                                                                       | gi 115305033,gi 116004001,gi 118572320,gi 75775078                                        | 47,334.80 | 100.00% | 6 | 6 | 7 | 0.07% | 21.50% | MRGEAE<br>AFAIGAR                                     | 3.39 | 1,394.68 |
| ATP | 6006 | Flotillin 1                                                                       | gi 115305033,gi 116004001,gi 118572320,gi 75775078                                        | 47,334.80 | 100.00% | 6 | 6 | 7 | 0.07% | 21.50% | VASSDL<br>VNMGIS<br>VVSYTL<br>KDIHDD<br>QDYLHS<br>LGK | 2.97 | 3,635.79 |
| ATP | 6006 | Flotillin 1                                                                       | gi 115305033,gi 116004001,gi 118572320,gi 75775078                                        | 47,334.80 | 100.00% | 6 | 6 | 7 | 0.07% | 21.50% | VTGEVL<br>DILSR                                       | 3.21 | 1,201.68 |

|     |      |                                                                                                 |                                                    |            |         |   |   |   |       |        |                                 |      |          |
|-----|------|-------------------------------------------------------------------------------------------------|----------------------------------------------------|------------|---------|---|---|---|-------|--------|---------------------------------|------|----------|
| ATP | 6006 | Flotillin 1                                                                                     | gi 115305033,gi 116004001,gi 118572320,gi 75775078 | 47,334.80  | 100.00% | 6 | 6 | 7 | 0.07% | 21.50% | VTGEVL<br>DILSRLP<br>ESVER      | 3.61 | 2,012.10 |
| ATP | 6006 | glutathione peroxidase 8                                                                        | gi 114052907,gi 122143886,gi 84708688              | 23,965.80  | 99.80%  | 2 | 3 | 3 | 0.03% | 11.00% | ILGSEAE<br>PAFR                 | 2.88 | 1,189.62 |
| ATP | 6006 | glutathione peroxidase 8                                                                        | gi 114052907,gi 122143886,gi 84708688              | 23,965.80  | 99.80%  | 2 | 3 | 3 | 0.03% | 11.00% | NNFGVT<br>FPIPHK                | 3.39 | 1,420.74 |
| ATP | 6006 | PREDICTED: similar to Neuroblast differentiation-associated protein AHNAK (Desmoyokin), partial | gi 194687805                                       | 140,614.00 | 99.80%  | 2 | 2 | 2 | 0.02% | 2.54%  | FSMPGF<br>KGEAPE<br>VDVNLP<br>K | 2.52 | 2,064.01 |
| ATP | 6006 | PREDICTED: similar to Neuroblast differentiation-associated protein AHNAK (Desmoyokin), partial | gi 194687805                                       | 140,614.00 | 99.80%  | 2 | 2 | 2 | 0.02% | 2.54%  | ISMPDV<br>DLNLKG<br>PK          | 2.91 | 1,542.82 |
| ATP | 6006 | ANXA6 protein                                                                                   | gi 154426044,gi 157151716,gi 160332337             | 75,893.80  | 100.00% | 8 | 8 | 8 | 0.08% | 15.90% | EMSGDV<br>RDVFVA<br>IVQSVK      | 3.54 | 1,995.02 |
| ATP | 6006 | ANXA6 protein                                                                                   | gi 154426044,gi 157151716,gi 160332337             | 75,893.80  | 100.00% | 8 | 8 | 8 | 0.08% | 15.90% | GLGTDE<br>DTIIDIA<br>HR         | 2.82 | 1,738.90 |
| ATP | 6006 | ANXA6 protein                                                                                   | gi 154426044,gi 157151716,gi 160332337             | 75,893.80  | 100.00% | 8 | 8 | 8 | 0.08% | 15.90% | GTVRPA<br>GDFNPD<br>ADAK        | 3.18 | 1,630.78 |
| ATP | 6006 | ANXA6 protein                                                                                   | gi 154426044,gi 157151716,gi 160332337             | 75,893.80  | 100.00% | 8 | 8 | 8 | 0.08% | 15.90% | ILISLAT<br>GNREEG<br>GEDRER     | 3.72 | 2,115.08 |
| ATP | 6006 | ANXA6 protein                                                                                   | gi 154426044,gi 157151716,gi 160332337             | 75,893.80  | 100.00% | 8 | 8 | 8 | 0.08% | 15.90% | NKPLFF<br>ADKLYK                | 3.98 | 1,483.83 |
| ATP | 6006 | ANXA6 protein                                                                                   | gi 154426044,gi 157151716,gi 160332337             | 75,893.80  | 100.00% | 8 | 8 | 8 | 0.08% | 15.90% | SEIDLLN<br>IR                   | 2.42 | 1,072.60 |
| ATP | 6006 | ANXA6 protein                                                                                   | gi 154426044,gi 157151716,gi 160332337             | 75,893.80  | 100.00% | 8 | 8 | 8 | 0.08% | 15.90% | SEIDLLN<br>IRR                  | 1.74 | 1,228.70 |

|     |      |                                                               |                                                    |           |         |   |   |    |       |        |                                                                  |      |          |
|-----|------|---------------------------------------------------------------|----------------------------------------------------|-----------|---------|---|---|----|-------|--------|------------------------------------------------------------------|------|----------|
| ATP | 6006 | ANXA6 protein                                                 | gi 154426044,gi 157151716,gi 160332337             | 75,893.80 | 100.00% | 8 | 8 | 8  | 0.08% | 15.90% | SLHQAIE<br>GDTSGH<br>FLK                                         | 3.36 | 1,739.87 |
| ATP | 6006 | dolichyl-diphosphooligosaccharide-protein glycosyltransferase | gi 110665590,gi 151555878,gi 155371877,gi 15275740 | 48,774.90 | 100.00% | 6 | 7 | 10 | 0.11% | 20.50% | GFVLTFK                                                          | 2.05 | 811.4713 |
| ATP | 6006 | dolichyl-diphosphooligosaccharide-protein glycosyltransferase | gi 110665590,gi 151555878,gi 155371877,gi 15275740 | 48,774.90 | 100.00% | 6 | 7 | 10 | 0.11% | 20.50% | GVGMV<br>ADPDNP<br>LVLILT<br>GSSTSYS<br>FFPDKPI<br>TQYPHA<br>VGK | 5.52 | 4,350.16 |
| ATP | 6006 | dolichyl-diphosphooligosaccharide-protein glycosyltransferase | gi 110665590,gi 151555878,gi 155371877,gi 15275740 | 48,774.90 | 100.00% | 6 | 7 | 10 | 0.11% | 20.50% | LPDVYG<br>VFQFK                                                  | 2.98 | 1,312.69 |
| ATP | 6006 | dolichyl-diphosphooligosaccharide-protein glycosyltransferase | gi 110665590,gi 151555878,gi 155371877,gi 15275740 | 48,774.90 | 100.00% | 6 | 7 | 10 | 0.11% | 20.50% | SSLNPIL<br>FR                                                    | 2.8  | 1,046.60 |
| ATP | 6006 | dolichyl-diphosphooligosaccharide-protein glycosyltransferase | gi 110665590,gi 151555878,gi 155371877,gi 15275740 | 48,774.90 | 100.00% | 6 | 7 | 10 | 0.11% | 20.50% | TADDPS<br>LSLIK                                                  | 2.91 | 1,159.62 |
| ATP | 6006 | dolichyl-diphosphooligosaccharide-protein glycosyltransferase | gi 110665590,gi 151555878,gi 155371877,gi 15275740 | 48,774.90 | 100.00% | 6 | 7 | 10 | 0.11% | 20.50% | TLVLLD<br>NLNLR                                                  | 3.15 | 1,283.77 |
| ATP | 6006 | reticulon 4 isoform 2                                         | gi 164259354,gi 92096636                           | 40,940.20 | 100.00% | 3 | 4 | 5  | 0.05% | 7.92%  | GPLPAA<br>PLAAPE<br>R                                            | 3.33 | 1,259.71 |
| ATP | 6006 | reticulon 4 isoform 2                                         | gi 164259354,gi 92096636                           | 40,940.20 | 100.00% | 3 | 4 | 5  | 0.05% | 7.92%  | HQAQID<br>HYLGLA<br>NK                                           | 3.97 | 1,607.83 |
| ATP | 6006 | reticulon 4 isoform 2                                         | gi 164259354,gi 92096636                           | 40,940.20 | 100.00% | 3 | 4 | 5  | 0.05% | 7.92%  | HQAQID<br>HYLGLA<br>NKNVK                                        | 3.95 | 1,949.04 |
| ATP | 6006 | ATL3 protein                                                  | gi 148745456,gi 154707918                          | 60,294.70 | 100.00% | 3 | 6 | 7  | 0.07% | 8.32%  | IYQGED<br>LPHPK                                                  | 3.2  | 1,296.66 |
| ATP | 6006 | ATL3 protein                                                  | gi 148745456,gi 154707918                          | 60,294.70 | 100.00% | 3 | 6 | 7  | 0.07% | 8.32%  | LQVKEH<br>QHEEIQ<br>NVR                                          | 3.39 | 1,886.98 |
| ATP | 6006 | ATL3 protein                                                  | gi 148745456,gi 154707918                          | 60,294.70 | 100.00% | 3 | 6 | 7  | 0.07% | 8.32%  | SMLQAT<br>AEANNL<br>AAAASA<br>K                                  | 5.18 | 1,848.91 |

|     |      |                                                                                                     |                                       |           |         |    |    |    |       |        |                        |      |          |
|-----|------|-----------------------------------------------------------------------------------------------------|---------------------------------------|-----------|---------|----|----|----|-------|--------|------------------------|------|----------|
| ATP | 6006 | Poliovirus receptor-related 2 (herpesvirus entry mediator B)                                        | gi 109658349,gi 115497936             | 43,243.10 | 100.00% | 3  | 3  | 3  | 0.03% | 9.68%  | ETQGSGLPLPGTVTVTSR     | 3.67 | 1,686.87 |
| ATP | 6006 | Poliovirus receptor-related 2 (herpesvirus entry mediator B)                                        | gi 109658349,gi 115497936             | 43,243.10 | 100.00% | 3  | 3  | 3  | 0.03% | 9.68%  | LLPVILSVR              | 2.15 | 1,009.68 |
| ATP | 6006 | Poliovirus receptor-related 2 (herpesvirus entry mediator B)                                        | gi 109658349,gi 115497936             | 43,243.10 | 100.00% | 3  | 3  | 3  | 0.03% | 9.68%  | YTVTPLSEADGVK          | 2.93 | 1,379.71 |
| ATP | 6006 | Lamin A/C                                                                                           | gi 74354719,gi 77404182               | 65,105.20 | 100.00% | 3  | 3  | 3  | 0.03% | 6.64%  | IRIDSLSAQLSQLQK        | 2.92 | 1,699.97 |
| ATP | 6006 | Lamin A/C                                                                                           | gi 74354719,gi 77404182               | 65,105.20 | 100.00% | 3  | 3  | 3  | 0.03% | 6.64%  | LADALQELR              | 2.43 | 1,028.57 |
| ATP | 6006 | Lamin A/C                                                                                           | gi 74354719,gi 77404182               | 65,105.20 | 100.00% | 3  | 3  | 3  | 0.03% | 6.64%  | VAVEEVDEEGKFR          | 2.29 | 1,605.81 |
| ATP | 6006 | serpin peptidase inhibitor, clade H (heat shock protein 47), member 1, (collagen binding protein 1) | gi 114051505,gi 116256076,gi 86821084 | 46,490.00 | 100.00% | 13 | 16 | 19 | 0.20% | 42.60% | AVAISLPK               | 2.53 | 798.5084 |
| ATP | 6006 | serpin peptidase inhibitor, clade H (heat shock protein 47), member 1, (collagen binding protein 1) | gi 114051505,gi 116256076,gi 86821084 | 46,490.00 | 100.00% | 13 | 16 | 19 | 0.20% | 42.60% | AVLSAEQLRDDEVHAGLLELLR | 5.64 | 2,391.26 |



|     |      |                                                                                                                                         |                                                   |           |         |    |    |    |       |        |                                                 |          |
|-----|------|-----------------------------------------------------------------------------------------------------------------------------------------|---------------------------------------------------|-----------|---------|----|----|----|-------|--------|-------------------------------------------------|----------|
| ATP | 6006 | serpin<br>peptidase<br>inhibitor,<br>clade H<br>(heat<br>shock<br>protein<br>47),<br>member<br>1,<br>(collagen<br>binding<br>protein 1) | gi 1140515<br>05,gi 11625<br>6076,gi 868<br>21084 | 46,490.00 | 100.00% | 13 | 16 | 19 | 0.20% | 42.60% | DQAVEN 4.67<br>ILLSPVV<br>VASSLG<br>LVSLGG<br>K | 2,565.45 |
| ATP | 6006 | serpin<br>peptidase<br>inhibitor,<br>clade H<br>(heat<br>shock<br>protein<br>47),<br>member<br>1,<br>(collagen<br>binding<br>protein 1) | gi 1140515<br>05,gi 11625<br>6076,gi 868<br>21084 | 46,490.00 | 100.00% | 13 | 16 | 19 | 0.20% | 42.60% | DTQSGS 2.06<br>LLFIGR                           | 1,293.68 |
| ATP | 6006 | serpin<br>peptidase<br>inhibitor,<br>clade H<br>(heat<br>shock<br>protein<br>47),<br>member<br>1,<br>(collagen<br>binding<br>protein 1) | gi 1140515<br>05,gi 11625<br>6076,gi 868<br>21084 | 46,490.00 | 100.00% | 13 | 16 | 19 | 0.20% | 42.60% | GVVEVT 3.82<br>HDLQK                            | 1,224.66 |
| ATP | 6006 | serpin<br>peptidase<br>inhibitor,<br>clade H<br>(heat<br>shock<br>protein<br>47),<br>member<br>1,<br>(collagen<br>binding<br>protein 1) | gi 1140515<br>05,gi 11625<br>6076,gi 868<br>21084 | 46,490.00 | 100.00% | 13 | 16 | 19 | 0.20% | 42.60% | HLAGLG 5.22<br>LTEAIDK<br>NK                    | 1,579.88 |

|     |      |                                                                                                                                         |                                                   |           |         |    |    |    |       |        |                                  |      |          |
|-----|------|-----------------------------------------------------------------------------------------------------------------------------------------|---------------------------------------------------|-----------|---------|----|----|----|-------|--------|----------------------------------|------|----------|
| ATP | 6006 | serpin<br>peptidase<br>inhibitor,<br>clade H<br>(heat<br>shock<br>protein<br>47),<br>member<br>1,<br>(collagen<br>binding<br>protein 1) | gi 1140515<br>05,gi 11625<br>6076,gi 868<br>21084 | 46,490.00 | 100.00% | 13 | 16 | 19 | 0.20% | 42.60% | HLAGLG<br>LTEAIDK<br>NKADLS<br>R | 5.59 | 2,122.16 |
| ATP | 6006 | serpin<br>peptidase<br>inhibitor,<br>clade H<br>(heat<br>shock<br>protein<br>47),<br>member<br>1,<br>(collagen<br>binding<br>protein 1) | gi 1140515<br>05,gi 11625<br>6076,gi 868<br>21084 | 46,490.00 | 100.00% | 13 | 16 | 19 | 0.20% | 42.60% | KPAAAA<br>APGTAE<br>KLSPK        | 3.93 | 1,607.91 |
| ATP | 6006 | serpin<br>peptidase<br>inhibitor,<br>clade H<br>(heat<br>shock<br>protein<br>47),<br>member<br>1,<br>(collagen<br>binding<br>protein 1) | gi 1140515<br>05,gi 11625<br>6076,gi 868<br>21084 | 46,490.00 | 100.00% | 13 | 16 | 19 | 0.20% | 42.60% | LFYADH<br>PFIFLVR                | 1.77 | 1,637.88 |
| ATP | 6006 | serpin<br>peptidase<br>inhibitor,<br>clade H<br>(heat<br>shock<br>protein<br>47),<br>member<br>1,<br>(collagen<br>binding<br>protein 1) | gi 1140515<br>05,gi 11625<br>6076,gi 868<br>21084 | 46,490.00 | 100.00% | 13 | 16 | 19 | 0.20% | 42.60% | LSSLIIM<br>PHHVEP<br>LER         | 2.62 | 2,000.10 |

|     |      |                                                                                                                                         |                                                   |           |         |    |    |    |       |        |                              |      |          |
|-----|------|-----------------------------------------------------------------------------------------------------------------------------------------|---------------------------------------------------|-----------|---------|----|----|----|-------|--------|------------------------------|------|----------|
| ATP | 6006 | serpin<br>peptidase<br>inhibitor,<br>clade H<br>(heat<br>shock<br>protein<br>47),<br>member<br>1,<br>(collagen<br>binding<br>protein 1) | gi 1140515<br>05,gi 11625<br>6076,gi 868<br>21084 | 46,490.00 | 100.00% | 13 | 16 | 19 | 0.20% | 42.60% | LSSLIIIM<br>PHHVEP<br>LERLEK | 3.45 | 2,370.32 |
| ATP | 6006 | serpin<br>peptidase<br>inhibitor,<br>clade H<br>(heat<br>shock<br>protein<br>47),<br>member<br>1,<br>(collagen<br>binding<br>protein 1) | gi 1140515<br>05,gi 11625<br>6076,gi 868<br>21084 | 46,490.00 | 100.00% | 13 | 16 | 19 | 0.20% | 42.60% | LYGPSS<br>VSFAED<br>FVR      | 4.1  | 1,673.82 |
| ATP | 6006 | serpin<br>peptidase<br>inhibitor,<br>clade H<br>(heat<br>shock<br>protein<br>47),<br>member<br>1,<br>(collagen<br>binding<br>protein 1) | gi 1140515<br>05,gi 11625<br>6076,gi 868<br>21084 | 46,490.00 | 100.00% | 13 | 16 | 19 | 0.20% | 42.60% | SAGLAF<br>SLYQAM<br>AK       | 4.3  | 1,473.74 |
| ATP | 6006 | PREDIC<br>TED:<br>transmem<br>brane<br>emp24<br>protein<br>transport<br>domain<br>containin<br>g 4                                      | gi 1946663<br>84                                  | 37,465.50 | 100.00% | 2  | 3  | 3  | 0.03% | 5.07%  | QLLDQV<br>EQIQK              | 2.86 | 1,341.74 |
| ATP | 6006 | PREDIC<br>TED:<br>transmem<br>brane<br>emp24<br>protein<br>transport<br>domain<br>containin<br>g 4                                      | gi 1946663<br>84                                  | 37,465.50 | 100.00% | 2  | 3  | 3  | 0.03% | 5.07%  | QLLDQV<br>EQIQKE<br>QDYQR    | 3.4  | 2,161.09 |

|     |      |                                                                              |                                                                               |            |         |    |    |    |       |        |                                                  |          |
|-----|------|------------------------------------------------------------------------------|-------------------------------------------------------------------------------|------------|---------|----|----|----|-------|--------|--------------------------------------------------|----------|
| ATP | 6006 | NNT<br>protein                                                               | gi 1337774<br>77,gi 16339<br>7,gi 163410<br>.gi 1720455<br>66,gi 27806<br>831 | 113,839.20 | 100.00% | 9  | 12 | 15 | 0.16% | 14.00% | AVVLAA 2.71<br>NHFGR                             | 1,154.64 |
| ATP | 6006 | NNT<br>protein                                                               | gi 1337774<br>77,gi 16339<br>7,gi 163410<br>.gi 1720455<br>66,gi 27806<br>831 | 113,839.20 | 100.00% | 9  | 12 | 15 | 0.16% | 14.00% | GITHIGY 3.01<br>TDLPSR                           | 1,429.74 |
| ATP | 6006 | NNT<br>protein                                                               | gi 1337774<br>77,gi 16339<br>7,gi 163410<br>.gi 1720455<br>66,gi 27806<br>831 | 113,839.20 | 100.00% | 9  | 12 | 15 | 0.16% | 14.00% | GTVVVM 3.79<br>KDGQVI<br>FPAPTPK                 | 1,901.02 |
| ATP | 6006 | NNT<br>protein                                                               | gi 1337774<br>77,gi 16339<br>7,gi 163410<br>.gi 1720455<br>66,gi 27806<br>831 | 113,839.20 | 100.00% | 9  | 12 | 15 | 0.16% | 14.00% | MATQAS 4.39<br>TLYSNNI<br>TK                     | 1,658.81 |
| ATP | 6006 | NNT<br>protein                                                               | gi 1337774<br>77,gi 16339<br>7,gi 163410<br>.gi 1720455<br>66,gi 27806<br>831 | 113,839.20 | 100.00% | 9  | 12 | 15 | 0.16% | 14.00% | QLTVGV 2.96<br>PKEIFQN<br>EKR                    | 1,886.05 |
| ATP | 6006 | NNT<br>protein                                                               | gi 1337774<br>77,gi 16339<br>7,gi 163410<br>.gi 1720455<br>66,gi 27806<br>831 | 113,839.20 | 100.00% | 9  | 12 | 15 | 0.16% | 14.00% | SLGVGY 4.4<br>AAVDNP<br>IFYKPNT<br>AMLLGD<br>AKK | 2,969.54 |
| ATP | 6006 | NNT<br>protein                                                               | gi 1337774<br>77,gi 16339<br>7,gi 163410<br>.gi 1720455<br>66,gi 27806<br>831 | 113,839.20 | 100.00% | 9  | 12 | 15 | 0.16% | 14.00% | TVAELE 3.38<br>AEKAATI<br>TPFRK                  | 1,975.09 |
| ATP | 6006 | NNT<br>protein                                                               | gi 1337774<br>77,gi 16339<br>7,gi 163410<br>.gi 1720455<br>66,gi 27806<br>831 | 113,839.20 | 100.00% | 9  | 12 | 15 | 0.16% | 14.00% | VALSPA 5.4<br>GVQALV<br>K                        | 1,252.76 |
| ATP | 6006 | NNT<br>protein                                                               | gi 1337774<br>77,gi 16339<br>7,gi 163410<br>.gi 1720455<br>66,gi 27806<br>831 | 113,839.20 | 100.00% | 9  | 12 | 15 | 0.16% | 14.00% | VTIAQG 4.7<br>YDALSS<br>MANIAG<br>YK             | 2,089.03 |
| ATP | 6006 | Transme<br>mbrane<br>emp24-<br>like<br>traffickin<br>g protein<br>10 (yeast) | gi 1337781<br>87,gi 59858<br>463,gi 6290<br>1402,gi 949<br>66895              | 24,810.80  | 100.00% | 10 | 14 | 19 | 0.20% | 35.20% | GTGRIPD 3.74<br>QLVILD<br>MK                     | 1,655.92 |
| ATP | 6006 | Transme<br>mbrane<br>emp24-<br>like<br>traffickin<br>g protein<br>10 (yeast) | gi 1337781<br>87,gi 59858<br>463,gi 6290<br>1402,gi 949<br>66895              | 24,810.80  | 100.00% | 10 | 14 | 19 | 0.20% | 35.20% | IPDQLVI 3.65<br>LDMK                             | 1,300.72 |

|     |      |                                                          |                                                  |           |         |    |    |    |       |        |                       |      |          |
|-----|------|----------------------------------------------------------|--------------------------------------------------|-----------|---------|----|----|----|-------|--------|-----------------------|------|----------|
| ATP | 6006 | Transmembrane emp24-like traffickin g protein 10 (yeast) | gi 133778187,gi 59858463,gi 62901402,gi 94966895 | 24,810.80 | 100.00% | 10 | 14 | 19 | 0.20% | 35.20% | IPDQLVI LDMKHG VEAK   | 3.09 | 1,922.04 |
| ATP | 6006 | Transmembrane emp24-like traffickin g protein 10 (yeast) | gi 133778187,gi 59858463,gi 62901402,gi 94966895 | 24,810.80 | 100.00% | 10 | 14 | 19 | 0.20% | 35.20% | ITDSAGH ILYSK         | 4.6  | 1,304.68 |
| ATP | 6006 | Transmembrane emp24-like traffickin g protein 10 (yeast) | gi 133778187,gi 59858463,gi 62901402,gi 94966895 | 24,810.80 | 100.00% | 10 | 14 | 19 | 0.20% | 35.20% | ITDSAGH ILYSKED ATK   | 4.48 | 1,848.93 |
| ATP | 6006 | Transmembrane emp24-like traffickin g protein 10 (yeast) | gi 133778187,gi 59858463,gi 62901402,gi 94966895 | 24,810.80 | 100.00% | 10 | 14 | 19 | 0.20% | 35.20% | ITDSAGH ILYSKED ATKGK | 4.45 | 2,034.05 |
| ATP | 6006 | Transmembrane emp24-like traffickin g protein 10 (yeast) | gi 133778187,gi 59858463,gi 62901402,gi 94966895 | 24,810.80 | 100.00% | 10 | 14 | 19 | 0.20% | 35.20% | LKPLEV ELR            | 3.6  | 1,096.67 |
| ATP | 6006 | Transmembrane emp24-like traffickin g protein 10 (yeast) | gi 133778187,gi 59858463,gi 62901402,gi 94966895 | 24,810.80 | 100.00% | 10 | 14 | 19 | 0.20% | 35.20% | NYEEIA KVEK           | 3.09 | 1,222.63 |
| ATP | 6006 | Transmembrane emp24-like traffickin g protein 10 (yeast) | gi 133778187,gi 59858463,gi 62901402,gi 94966895 | 24,810.80 | 100.00% | 10 | 14 | 19 | 0.20% | 35.20% | RLEDLSE SIVNDFA YMK   | 5.08 | 2,045.99 |
| ATP | 6006 | Transmembrane emp24-like traffickin g protein 10 (yeast) | gi 133778187,gi 59858463,gi 62901402,gi 94966895 | 24,810.80 | 100.00% | 10 | 14 | 19 | 0.20% | 35.20% | RLEDLSE SIVNDFA YMCK  | 4.91 | 2,174.08 |
| ATP | 6006 | signal recognition particle receptor                     | gi 115497558,gi 122139924,gi 75773717            | 69,879.80 | 99.80%  | 2  | 2  | 2  | 0.02% | 4.23%  | NQGFVDV VLVDTA GR     | 4.2  | 1,490.76 |

|     |      |                                                                     |                                       |            |         |   |   |   |       |        |                                              |      |          |
|-----|------|---------------------------------------------------------------------|---------------------------------------|------------|---------|---|---|---|-------|--------|----------------------------------------------|------|----------|
| ATP | 6006 | signal recognition particle receptor                                | gi 115497558,gi 122139924,gi 75773717 | 69,879.80  | 99.80%  | 2 | 2 | 2 | 0.02% | 4.23%  | VMGTFS<br>TVTSTV<br>K                        | 2.75 | 1,373.70 |
| ATP | 6006 | solute carrier family 4, sodium bicarbonate cotransporter, member 7 | gi 219282724                          | 135,822.00 | 100.00% | 6 | 6 | 6 | 0.06% | 9.11%  | FLFLLG<br>PAGK                               | 3.35 | 1,175.72 |
| ATP | 6006 | solute carrier family 4, sodium bicarbonate cotransporter, member 7 | gi 219282724                          | 135,822.00 | 100.00% | 6 | 6 | 6 | 0.06% | 9.11%  | GPDEEA<br>VVDLGK                             | 3.47 | 1,228.61 |
| ATP | 6006 | solute carrier family 4, sodium bicarbonate cotransporter, member 7 | gi 219282724                          | 135,822.00 | 100.00% | 6 | 6 | 6 | 0.06% | 9.11%  | KIPSGAE<br>ASNVLV<br>GEVDFL<br>ERPPIAF<br>VR | 3.05 | 3,026.67 |
| ATP | 6006 | solute carrier family 4, sodium bicarbonate cotransporter, member 7 | gi 219282724                          | 135,822.00 | 100.00% | 6 | 6 | 6 | 0.06% | 9.11%  | LAPAVL<br>LSGLTE<br>VPVPTR                   | 3.76 | 1,833.08 |
| ATP | 6006 | solute carrier family 4, sodium bicarbonate cotransporter, member 7 | gi 219282724                          | 135,822.00 | 100.00% | 6 | 6 | 6 | 0.06% | 9.11%  | MLQAGE<br>DTVHLP<br>FEGGSL<br>QIPVK          | 2.77 | 2,595.35 |
| ATP | 6006 | solute carrier family 4, sodium bicarbonate cotransporter, member 7 | gi 219282724                          | 135,822.00 | 100.00% | 6 | 6 | 6 | 0.06% | 9.11%  | TSSTVN<br>TKFEKE<br>ELESHR                   | 3.21 | 2,122.04 |
| ATP | 6006 | emerin                                                              | gi 37781186,gi 42733600,gi 74356375   | 29,454.80  | 100.00% | 4 | 6 | 6 | 0.06% | 23.00% | FSDLDS<br>ASVDS<br>MYDLPK                    | 2.59 | 2,020.87 |

|     |      |                                           |                                      |           |         |   |    |    |       |        |                                    |          |
|-----|------|-------------------------------------------|--------------------------------------|-----------|---------|---|----|----|-------|--------|------------------------------------|----------|
| ATP | 6006 | emerin                                    | gi 37781186,gi 42733600,gi 74356375  | 29,454.80 | 100.00% | 4 | 6  | 6  | 0.06% | 23.00% | FSDLDS 4.71                        | 3,196.49 |
|     |      |                                           |                                      |           |         |   |    |    |       |        | ASVDS<br>MYDLPK<br>KEDALL<br>YQSK  |          |
| ATP | 6006 | emerin                                    | gi 37781186,gi 42733600,gi 74356375  | 29,454.80 | 100.00% | 4 | 6  | 6  | 0.06% | 23.00% | GFRQPS 4.93                        | 1,887.91 |
|     |      |                                           |                                      |           |         |   |    |    |       |        | ASLSDA<br>DPFHR                    |          |
| ATP | 6006 | emerin                                    | gi 37781186,gi 42733600,gi 74356375  | 29,454.80 | 100.00% | 4 | 6  | 6  | 0.06% | 23.00% | GYNDDY 3.33                        | 1,888.79 |
|     |      |                                           |                                      |           |         |   |    |    |       |        | YEESYL<br>TTR                      |          |
| ATP | 6006 | RecName : Full=Ras-related protein Rab-7a | gi 108860919,gi 74354082,gi 78045539 | 23,526.10 | 100.00% | 5 | 5  | 6  | 0.06% | 24.20% | ATIGADF 2.54                       | 1,036.57 |
|     |      |                                           |                                      |           |         |   |    |    |       |        | LTK                                |          |
| ATP | 6006 | RecName : Full=Ras-related protein Rab-7a | gi 108860919,gi 74354082,gi 78045539 | 23,526.10 | 100.00% | 5 | 5  | 6  | 0.06% | 24.20% | DPENFPF 4.25                       | 1,475.75 |
|     |      |                                           |                                      |           |         |   |    |    |       |        | VVLGNK                             |          |
| ATP | 6006 | RecName : Full=Ras-related protein Rab-7a | gi 108860919,gi 74354082,gi 78045539 | 23,526.10 | 100.00% | 5 | 5  | 6  | 0.06% | 24.20% | DPENFPF 3.79                       | 2,216.13 |
|     |      |                                           |                                      |           |         |   |    |    |       |        | VVLGNK<br>IDLENR                   |          |
| ATP | 6006 | RecName : Full=Ras-related protein Rab-7a | gi 108860919,gi 74354082,gi 78045539 | 23,526.10 | 100.00% | 5 | 5  | 6  | 0.06% | 24.20% | FQSLGV 2.91                        | 1,187.62 |
|     |      |                                           |                                      |           |         |   |    |    |       |        | AFYR                               |          |
| ATP | 6006 | RecName : Full=Ras-related protein Rab-7a | gi 108860919,gi 74354082,gi 78045539 | 23,526.10 | 100.00% | 5 | 5  | 6  | 0.06% | 24.20% | VIILGDS 2.65                       | 1,057.63 |
|     |      |                                           |                                      |           |         |   |    |    |       |        | GVGK                               |          |
| ATP | 6006 | heat shock 70kDa protein 8                | gi 146231704                         | 71,224.20 | 100.00% | 8 | 11 | 11 | 0.12% | 16.80% | ARFEEL 4.26                        | 1,480.75 |
|     |      |                                           |                                      |           |         |   |    |    |       |        | NADLFR                             |          |
| ATP | 6006 | heat shock 70kDa protein 8                | gi 146231704                         | 71,224.20 | 100.00% | 8 | 11 | 11 | 0.12% | 16.80% | ARFEEL 2.87                        | 2,320.19 |
|     |      |                                           |                                      |           |         |   |    |    |       |        | NADLFR<br>GTLDPV<br>EK             |          |
| ATP | 6006 | heat shock 70kDa protein 8                | gi 146231704                         | 71,224.20 | 100.00% | 8 | 11 | 11 | 0.12% | 16.80% | FEELNA 2.44                        | 1,253.62 |
|     |      |                                           |                                      |           |         |   |    |    |       |        | DLFR                               |          |
| ATP | 6006 | heat shock 70kDa protein 8                | gi 146231704                         | 71,224.20 | 100.00% | 8 | 11 | 11 | 0.12% | 16.80% | IINEPTA 4.01                       | 1,659.90 |
|     |      |                                           |                                      |           |         |   |    |    |       |        | AAIAYG<br>LDK                      |          |
| ATP | 6006 | heat shock 70kDa protein 8                | gi 146231704                         | 71,224.20 | 100.00% | 8 | 11 | 11 | 0.12% | 16.80% | MKEIAE 3.76                        | 3,231.64 |
|     |      |                                           |                                      |           |         |   |    |    |       |        | AYLGKT<br>VTNAV<br>TVPAYF<br>NDSQR |          |
| ATP | 6006 | heat shock 70kDa protein 8                | gi 146231704                         | 71,224.20 | 100.00% | 8 | 11 | 11 | 0.12% | 16.80% | NQVAM 3.38                         | 1,665.79 |
|     |      |                                           |                                      |           |         |   |    |    |       |        | NPTNTV<br>FDAQ                     |          |

|     |      |                                     |                                       |           |         |    |    |    |       |        |                      |      |          |
|-----|------|-------------------------------------|---------------------------------------|-----------|---------|----|----|----|-------|--------|----------------------|------|----------|
| ATP | 6006 | heat shock 70kDa protein 8          | gi 146231704                          | 71,224.20 | 100.00% | 8  | 11 | 11 | 0.12% | 16.80% | STAGDT HLGGED FDNR   | 2.93 | 1,691.73 |
| ATP | 6006 | heat shock 70kDa protein 8          | gi 146231704                          | 71,224.20 | 100.00% | 8  | 11 | 11 | 0.12% | 16.80% | TTPSYV AFTDTE R      | 3.39 | 1,487.70 |
| ATP | 6006 | heat shock 70kDa protein 8          | gi 146231704                          | 71,224.20 | 100.00% | 8  | 11 | 11 | 0.12% | 16.80% | TVTNAV VTPPAY FNDSQR | 2.68 | 1,982.00 |
| ATP | 6006 | solute carrier family 25, member A6 | gi 119936593,gi 151557097,gi 32189336 | 32,860.40 | 100.00% | 10 | 15 | 24 | 0.25% | 26.80% | AAAYFGI YDTAK        | 2.86 | 1,219.60 |
| ATP | 6006 | solute carrier family 25, member A6 | gi 119936593,gi 151557097,gi 32189336 | 32,860.40 | 100.00% | 10 | 15 | 24 | 0.25% | 26.80% | DFLAGGI AAAISK       | 4.9  | 1,233.68 |
| ATP | 6006 | solute carrier family 25, member A6 | gi 119936593,gi 151557097,gi 32189336 | 32,860.40 | 100.00% | 10 | 15 | 24 | 0.25% | 26.80% | GMGGAF VLVLYD ELK    | 2.91 | 1,627.84 |
| ATP | 6006 | solute carrier family 25, member A6 | gi 119936593,gi 151557097,gi 32189336 | 32,860.40 | 100.00% | 10 | 15 | 24 | 0.25% | 26.80% | GMGGAF VLVLYD ELKK   | 2.88 | 1,755.94 |
| ATP | 6006 | solute carrier family 25, member A6 | gi 119936593,gi 151557097,gi 32189336 | 32,860.40 | 100.00% | 10 | 15 | 24 | 0.25% | 26.80% | GMGGAF VLVLYD ELKKVI | 2.47 | 1,968.09 |
| ATP | 6006 | solute carrier family 25, member A6 | gi 119936593,gi 151557097,gi 32189336 | 32,860.40 | 100.00% | 10 | 15 | 24 | 0.25% | 26.80% | QIFLGGV DKR          | 2.46 | 1,132.65 |
| ATP | 6006 | solute carrier family 25, member A6 | gi 119936593,gi 151557097,gi 32189336 | 32,860.40 | 100.00% | 10 | 15 | 24 | 0.25% | 26.80% | VKLLLQ VQHASK        | 3.83 | 1,363.84 |
| ATP | 6006 | solute carrier family 25, member A6 | gi 119936593,gi 151557097,gi 32189336 | 32,860.40 | 100.00% | 10 | 15 | 24 | 0.25% | 26.80% | YFPTQA LNFAFK        | 4.71 | 1,446.74 |
| ATP | 6006 | solute carrier family 25, member A6 | gi 119936593,gi 151557097,gi 32189336 | 32,860.40 | 100.00% | 10 | 15 | 24 | 0.25% | 26.80% | YFPTQA LNFAFK DK     | 3.09 | 1,689.86 |



|     |      |                                                                             |                                       |            |         |    |    |    |       |        |                       |      |          |
|-----|------|-----------------------------------------------------------------------------|---------------------------------------|------------|---------|----|----|----|-------|--------|-----------------------|------|----------|
| ATP | 6006 | solute carrier family 25, member A6                                         | gi 119936593,gi 151557097,gi 32189336 | 32,860.40  | 100.00% | 10 | 15 | 24 | 0.25% | 26.80% | YFPTQA LNFAFK DKYK    | 3.89 | 1,981.02 |
| ATP | 6006 | PREDICTED: insulin-like growth factor 1 receptor                            | gi 119913553                          | 135,693.80 | 100.00% | 3  | 4  | 4  | 0.04% | 3.90%  | AVTLTM VENDHIR        | 2.42 | 1,514.76 |
| ATP | 6006 | PREDICTED: insulin-like growth factor 1 receptor                            | gi 119913553                          | 135,693.80 | 100.00% | 3  | 4  | 4  | 0.04% | 3.90%  | SLRPEM ENNPVL APPSLSK | 3.29 | 2,095.09 |
| ATP | 6006 | PREDICTED: insulin-like growth factor 1 receptor                            | gi 119913553                          | 135,693.80 | 100.00% | 3  | 4  | 4  | 0.04% | 3.90%  | TEAEKQ AEKEEA EYR     | 3.34 | 1,810.85 |
| ATP | 6006 | PREDICTED: similar to filamin B, beta (actin binding protein 278) isoform 7 | gi 194677296                          | 277,977.20 | 100.00% | 8  | 8  | 8  | 0.08% | 4.07%  | FADEHV PGSPFTV K      | 2.45 | 1,530.76 |
| ATP | 6006 | PREDICTED: similar to filamin B, beta (actin binding protein 278) isoform 7 | gi 194677296                          | 277,977.20 | 100.00% | 8  | 8  | 8  | 0.08% | 4.07%  | IVGPGLG SGVR          | 2.54 | 1,011.59 |
| ATP | 6006 | PREDICTED: similar to filamin B, beta (actin binding protein 278) isoform 7 | gi 194677296                          | 277,977.20 | 100.00% | 8  | 8  | 8  | 0.08% | 4.07%  | LIALLEV LSQK          | 2.79 | 1,226.77 |
| ATP | 6006 | PREDICTED: similar to filamin B, beta (actin binding protein 278) isoform 7 | gi 194677296                          | 277,977.20 | 100.00% | 8  | 8  | 8  | 0.08% | 4.07%  | SPFTVG VAAPLD LSR     | 3.81 | 1,529.83 |

|     |      |                                                                              |                        |            |         |   |   |   |       |       |                                 |      |          |
|-----|------|------------------------------------------------------------------------------|------------------------|------------|---------|---|---|---|-------|-------|---------------------------------|------|----------|
| ATP | 6006 | PREDIC TED: similar to filamin B, beta (actin binding protein 278) isoform 7 | gi 1946772_96          | 277,977.20 | 100.00% | 8 | 8 | 8 | 0.08% | 4.07% | VSFAGD TIPK                     | 2.64 | 1,034.55 |
| ATP | 6006 | PREDIC TED: similar to filamin B, beta (actin binding protein 278) isoform 7 | gi 1946772_96          | 277,977.20 | 100.00% | 8 | 8 | 8 | 0.08% | 4.07% | VTEAEIV PVGK                    | 2.82 | 1,141.65 |
| ATP | 6006 | PREDIC TED: similar to filamin B, beta (actin binding protein 278) isoform 7 | gi 1946772_96          | 277,977.20 | 100.00% | 8 | 8 | 8 | 0.08% | 4.07% | VTVLFA GQHISK                   | 2.17 | 1,299.74 |
| ATP | 6006 | PREDIC TED: similar to filamin B, beta (actin binding protein 278) isoform 7 | gi 1946772_96          | 277,977.20 | 100.00% | 8 | 8 | 8 | 0.08% | 4.07% | YTPTQQ GNMQVL VTYGGD PIPK       | 4.61 | 2,423.19 |
| ATP | 6006 | plasma membran e calcium-55 transporti ng ATPase                             | gi 1458276_2,gi 278072 | 134,738.10 | 100.00% | 3 | 3 | 3 | 0.03% | 7.62% | EAGHGT QKEIPE EELAED VEEIDH AER | 3.52 | 3,189.45 |
| ATP | 6006 | plasma membran e calcium-55 transporti ng ATPase                             | gi 1458276_2,gi 278072 | 134,738.10 | 100.00% | 3 | 3 | 3 | 0.03% | 7.62% | IDESSLT GESDHV K                | 2.32 | 1,516.71 |
| ATP | 6006 | plasma membran e calcium-55 transporti ng ATPase                             | gi 1458276_2,gi 278072 | 134,738.10 | 100.00% | 3 | 3 | 3 | 0.03% | 7.62% | QVVAVT GDGTND GPALK             | 3.35 | 1,641.84 |
| ATP | 6006 | plasma membran e calcium-55 transporti ng ATPase                             | gi 1458276_2,gi 278072 | 134,738.10 | 100.00% | 3 | 3 | 3 | 0.03% | 7.62% | QVVAVT GDGTND GPALKK            | 2.17 | 1,769.94 |
| ATP | 6006 | plasma membran e calcium-55 transporti ng ATPase                             | gi 1458276_2,gi 278072 | 134,738.10 | 100.00% | 3 | 3 | 3 | 0.03% | 7.62% | SLDKDP LLLSGT HVMEGS GR         | 3.91 | 2,128.07 |

|     |      |                                                           |                                                 |            |         |   |   |   |       |       |                                                   |          |
|-----|------|-----------------------------------------------------------|-------------------------------------------------|------------|---------|---|---|---|-------|-------|---------------------------------------------------|----------|
| ATP | 6006 | plasma membrane calcium-55 transporting ATPase            | gi 14582762,gi 278072                           | 134,738.10 | 100.00% | 3 | 3 | 3 | 0.03% | 7.62% | SSLYEGL 3.4<br>EKPESR                             | 1,494.74 |
| ATP | 6006 | UNC84B protein                                            | gi 151553917,gi 156121283                       | 81,429.80  | 99.80%  | 2 | 3 | 5 | 0.05% | 3.43% | EAVASL 2.81<br>GLTLQR                             | 1,257.72 |
| ATP | 6006 | UNC84B protein                                            | gi 151553917,gi 156121283                       | 81,429.80  | 99.80%  | 2 | 3 | 5 | 0.05% | 3.43% | IRPTAVT 2.82<br>LEHVPK                            | 1,460.86 |
| ATP | 6006 | MYO1C protein                                             | gi 146186525,gi 147906576,gi 397403,gi 90109868 | 118,133.10 | 100.00% | 6 | 7 | 7 | 0.07% | 8.75% | DQAVMI 1.93<br>SGESGA<br>GKTEAT<br>KR             | 2,052.00 |
| ATP | 6006 | MYO1C protein                                             | gi 146186525,gi 147906576,gi 397403,gi 90109868 | 118,133.10 | 100.00% | 6 | 7 | 7 | 0.07% | 8.75% | HLGYKP 2.49<br>EEYKMG<br>R                        | 1,623.80 |
| ATP | 6006 | MYO1C protein                                             | gi 146186525,gi 147906576,gi 397403,gi 90109868 | 118,133.10 | 100.00% | 6 | 7 | 7 | 0.07% | 8.75% | LLGVEG 2.22<br>STLR                               | 1,044.60 |
| ATP | 6006 | MYO1C protein                                             | gi 146186525,gi 147906576,gi 397403,gi 90109868 | 118,133.10 | 100.00% | 6 | 7 | 7 | 0.07% | 8.75% | LLQSNP 3.46<br>VLEAFG<br>NAK                      | 1,600.87 |
| ATP | 6006 | MYO1C protein                                             | gi 146186525,gi 147906576,gi 397403,gi 90109868 | 118,133.10 | 100.00% | 6 | 7 | 7 | 0.07% | 8.75% | MSLLEL 3.14<br>VEILK                              | 1,303.75 |
| ATP | 6006 | MYO1C protein                                             | gi 146186525,gi 147906576,gi 397403,gi 90109868 | 118,133.10 | 100.00% | 6 | 7 | 7 | 0.07% | 8.75% | VLQALG 2.53<br>SEPIQYA<br>VPVVKY<br>DR            | 2,345.29 |
| ATP | 6006 | PREDICTED: similar to Ras-interacting protein 1 isoform 2 | gi 76642189                                     | 103,383.20 | 99.80%  | 2 | 2 | 2 | 0.02% | 4.26% | AASGGA 4.09<br>ALASPG<br>PGSGSG<br>TPAGSG<br>GKER | 2,312.12 |
| ATP | 6006 | PREDICTED: similar to Ras-interacting protein 1 isoform 2 | gi 76642189                                     | 103,383.20 | 99.80%  | 2 | 2 | 2 | 0.02% | 4.26% | IFGAGLA 3.43<br>SGANYK                            | 1,268.66 |
| ATP | 6006 | PREDICTED: NOMO3-like protein isoform 2                   | gi 119916799,gi 119916801                       | 134,079.40 | 100.00% | 4 | 4 | 4 | 0.04% | 4.83% | GQPLGP 3.26<br>AGVQVS<br>LR                       | 1,378.78 |
| ATP | 6006 | PREDICTED: NOMO3-like protein isoform 2                   | gi 119916799,gi 119916801                       | 134,079.40 | 100.00% | 4 | 4 | 4 | 0.04% | 4.83% | SQYDFV 2.83<br>LPQVSFT<br>AAGYHK                  | 2,158.06 |

|     |      |                                              |                                                 |            |         |   |    |    |       |        |                              |      |          |
|-----|------|----------------------------------------------|-------------------------------------------------|------------|---------|---|----|----|-------|--------|------------------------------|------|----------|
| ATP | 6006 | PREDICTED:<br>NOMO3-like protein isoform 2   | gi 119916799,gi 119916801                       | 134,079.40 | 100.00% | 4 | 4  | 4  | 0.04% | 4.83%  | SSIDSEPALVLGPLK              | 3.31 | 1,525.85 |
| ATP | 6006 | PREDICTED:<br>NOMO3-like protein isoform 2   | gi 119916799,gi 119916801                       | 134,079.40 | 100.00% | 4 | 4  | 4  | 0.04% | 4.83%  | VQVMVPEAETR                  | 2.74 | 1,274.64 |
| ATP | 6006 | vesicle-associated membrane protein 3        | gi 114052342,gi 122136203,gi 86822282           | 11,517.30  | 100.00% | 7 | 12 | 15 | 0.16% | 51.00% | ADALQAGASQFETSAAK            | 4.12 | 1,665.81 |
| ATP | 6006 | vesicle-associated membrane protein 3        | gi 114052342,gi 122136203,gi 86822282           | 11,517.30  | 100.00% | 7 | 12 | 15 | 0.16% | 51.00% | DQKLSELDADRADALQAGASQFETSAAK | 4.38 | 2,865.39 |
| ATP | 6006 | vesicle-associated membrane protein 3        | gi 114052342,gi 122136203,gi 86822282           | 11,517.30  | 100.00% | 7 | 12 | 15 | 0.16% | 51.00% | LQQTQNVQDEVVDIMR             | 4.44 | 1,931.95 |
| ATP | 6006 | vesicle-associated membrane protein 3        | gi 114052342,gi 122136203,gi 86822282           | 11,517.30  | 100.00% | 7 | 12 | 15 | 0.16% | 51.00% | LSELDDRADALQAGASQFETSAAK     | 5.63 | 2,494.21 |
| ATP | 6006 | vesicle-associated membrane protein 3        | gi 114052342,gi 122136203,gi 86822282           | 11,517.30  | 100.00% | 7 | 12 | 15 | 0.16% | 51.00% | RLQQTQNVQDEVVDIMR            | 4.24 | 2,088.05 |
| ATP | 6006 | vesicle-associated membrane protein 3        | gi 114052342,gi 122136203,gi 86822282           | 11,517.30  | 100.00% | 7 | 12 | 15 | 0.16% | 51.00% | VNVDKVLER                    | 3.51 | 1,071.62 |
| ATP | 6006 | vesicle-associated membrane protein 3        | gi 114052342,gi 122136203,gi 86822282           | 11,517.30  | 100.00% | 7 | 12 | 15 | 0.16% | 51.00% | VNVDKVLERDQK                 | 2.63 | 1,442.80 |
| ATP | 6006 | transmembrane protein 24 domain containing 9 | gi 59858491,gi 74267997,gi 77736600,gi 81175032 | 27,280.40  | 100.00% | 6 | 10 | 15 | 0.16% | 16.20% | DKLSELQLR                    | 2.7  | 1,101.63 |
| ATP | 6006 | transmembrane protein 24 domain containing 9 | gi 59858491,gi 74267997,gi 77736600,gi 81175032 | 27,280.40  | 100.00% | 6 | 10 | 15 | 0.16% | 16.20% | FSLFAGGMLR                   | 3.07 | 1,114.57 |

|     |      |                                                                                       |                                                                 |            |         |   |    |    |       |        |                                 |      |          |
|-----|------|---------------------------------------------------------------------------------------|-----------------------------------------------------------------|------------|---------|---|----|----|-------|--------|---------------------------------|------|----------|
| ATP | 6006 | transmembrane emp24 protein transport domain containin g 9                            | gi 5985849<br>1,gi 742679<br>97,gi 77736<br>600,gi 8117<br>5032 | 27,280.40  | 100.00% | 6 | 10 | 15 | 0.16% | 16.20% | QLVEQV<br>EQIQK                 | 3.22 | 1,341.74 |
| ATP | 6006 | transmembrane emp24 protein transport domain containin g 9                            | gi 5985849<br>1,gi 742679<br>97,gi 77736<br>600,gi 8117<br>5032 | 27,280.40  | 100.00% | 6 | 10 | 15 | 0.16% | 16.20% | QLVEQV<br>EQIQKE<br>QNYQR       | 3.94 | 2,160.10 |
| ATP | 6006 | transmembrane emp24 protein transport domain containin g 9                            | gi 5985849<br>1,gi 742679<br>97,gi 77736<br>600,gi 8117<br>5032 | 27,280.40  | 100.00% | 6 | 10 | 15 | 0.16% | 16.20% | VRQLVE<br>QVEQIQ<br>K           | 2.79 | 1,596.91 |
| ATP | 6006 | transmembrane emp24 protein transport domain containin g 9                            | gi 5985849<br>1,gi 742679<br>97,gi 77736<br>600,gi 8117<br>5032 | 27,280.40  | 100.00% | 6 | 10 | 15 | 0.16% | 16.20% | VRQLVE<br>QVEQIQ<br>KEQNYQ<br>R | 5.22 | 2,415.27 |
| ATP | 6006 | PCDH1 protein                                                                         | gi 1340251<br>43,gi 13994<br>7544                               | 114,931.40 | 100.00% | 3 | 3  | 3  | 0.03% | 4.81%  | GLFTISP<br>ETGEIR               | 2.66 | 1,419.75 |
| ATP | 6006 | PCDH1 protein                                                                         | gi 1340251<br>43,gi 13994<br>7544                               | 114,931.40 | 100.00% | 3 | 3  | 3  | 0.03% | 4.81%  | NTGLITV<br>QGPVDR<br>EDLSTLR    | 2.73 | 2,184.16 |
| ATP | 6006 | PCDH1 protein                                                                         | gi 1340251<br>43,gi 13994<br>7544                               | 114,931.40 | 100.00% | 3 | 3  | 3  | 0.03% | 4.81%  | SPKPVK<br>PVEDED<br>ETGLQK      | 4.04 | 1,996.02 |
| ATP | 6006 | KRT4 protein                                                                          | gi 1340247<br>68                                                | 58,029.30  | 100.00% | 4 | 4  | 9  | 0.09% | 9.47%  | FASFIDK<br>VR                   | 2.12 | 1,082.60 |
| ATP | 6006 | KRT4 protein                                                                          | gi 1340247<br>68                                                | 58,029.30  | 100.00% | 4 | 4  | 9  | 0.09% | 9.47%  | LALDIEI<br>ATYR                 | 4.64 | 1,277.71 |
| ATP | 6006 | KRT4 protein                                                                          | gi 1340247<br>68                                                | 58,029.30  | 100.00% | 4 | 4  | 9  | 0.09% | 9.47%  | NEISELN<br>R                    | 3.4  | 974.4901 |
| ATP | 6006 | KRT4 protein                                                                          | gi 1340247<br>68                                                | 58,029.30  | 100.00% | 4 | 4  | 9  | 0.09% | 9.47%  | NLDLDSI<br>IAEVR                | 3.57 | 1,357.73 |
| ATP | 6006 | KRT4 protein                                                                          | gi 1340247<br>68                                                | 58,029.30  | 100.00% | 4 | 4  | 9  | 0.09% | 9.47%  | RTELEA<br>ALQKAK                | 3.43 | 1,357.78 |
| ATP | 6006 | PREDICTED: similar to solute carrier family 30 (zinc transporter), member 1 isoform 1 | gi 7663814<br>9                                                 | 55,359.70  | 99.80%  | 2 | 2  | 2  | 0.02% | 7.51%  | ESALILL<br>QTVPK                | 3.14 | 1,311.79 |

|     |      |                                                                                          |                           |           |         |    |    |    |       |        |                                       |      |          |
|-----|------|------------------------------------------------------------------------------------------|---------------------------|-----------|---------|----|----|----|-------|--------|---------------------------------------|------|----------|
| ATP | 6006 | PREDICTED:<br>similar to solute carrier family 30 (zinc transporter), member 1 isoform 1 | gi 76638149               | 55,359.70 | 99.80%  | 2  | 2  | 2  | 0.02% | 7.51%  | HKDVFH<br>NHGIHA<br>TTIQPEF<br>ASVGSK | 2.18 | 2,846.50 |
| ATP | 6006 | RAB1A, member 48                                                                         | gi 120419448              | 22,660.40 | 100.00% | 5  | 7  | 12 | 0.13% | 25.90% | EFADSL<br>GIPFLET<br>SAK              | 4    | 1,724.87 |
| ATP | 6006 | RAB1A, member 48                                                                         | gi 120419448              | 22,660.40 | 100.00% | 5  | 7  | 12 | 0.13% | 25.90% | KVVDYD<br>TAKEFA<br>DSLGIPF<br>LETSAK | 4.82 | 2,730.42 |
| ATP | 6006 | RAB1A, member 48                                                                         | gi 120419448              | 22,660.40 | 100.00% | 5  | 7  | 12 | 0.13% | 25.90% | LLLIGDS<br>GVGK                       | 3.14 | 1,071.64 |
| ATP | 6006 | RAB1A, member 48                                                                         | gi 120419448              | 22,660.40 | 100.00% | 5  | 7  | 12 | 0.13% | 25.90% | NATNVE<br>QSFMTM<br>AAEIK             | 3.19 | 1,900.88 |
| ATP | 6006 | RAB1A, member 48                                                                         | gi 120419448              | 22,660.40 | 100.00% | 5  | 7  | 12 | 0.13% | 25.90% | VVDYTT<br>AKEFAD<br>SLGIPFL<br>ETSAK  | 3.31 | 2,602.33 |
| ATP | 6006 | LMNB1 protein                                                                            | gi 154425605.gi 157074106 | 66,404.60 | 100.00% | 15 | 22 | 26 | 0.27% | 32.40% | ALYETE<br>LADAR                       | 3.06 | 1,251.62 |
| ATP | 6006 | LMNB1 protein                                                                            | gi 154425605.gi 157074106 | 66,404.60 | 100.00% | 15 | 22 | 26 | 0.27% | 32.40% | IESLSSQ<br>LSNLQK                     | 3.2  | 1,446.78 |
| ATP | 6006 | LMNB1 protein                                                                            | gi 154425605.gi 157074106 | 66,404.60 | 100.00% | 15 | 22 | 26 | 0.27% | 32.40% | IQELEDL<br>LAK                        | 2.91 | 1,171.66 |
| ATP | 6006 | LMNB1 protein                                                                            | gi 154425605.gi 157074106 | 66,404.60 | 100.00% | 15 | 22 | 26 | 0.27% | 32.40% | IQELEDL<br>LAKER                      | 2.44 | 1,456.80 |
| ATP | 6006 | LMNB1 protein                                                                            | gi 154425605.gi 157074106 | 66,404.60 | 100.00% | 15 | 22 | 26 | 0.27% | 32.40% | LALDME<br>ISAYRK                      | 2.46 | 1,425.74 |
| ATP | 6006 | LMNB1 protein                                                                            | gi 154425605.gi 157074106 | 66,404.60 | 100.00% | 15 | 22 | 26 | 0.27% | 32.40% | LAQALH<br>EMREQH<br>DAQVK             | 3.35 | 2,020.00 |
| ATP | 6006 | LMNB1 protein                                                                            | gi 154425605.gi 157074106 | 66,404.60 | 100.00% | 15 | 22 | 26 | 0.27% | 32.40% | LAVYID<br>KVR                         | 2.46 | 1,076.65 |
| ATP | 6006 | LMNB1 protein                                                                            | gi 154425605.gi 157074106 | 66,404.60 | 100.00% | 15 | 22 | 26 | 0.27% | 32.40% | LLEGEEDL<br>RLK                       | 3.1  | 1,215.66 |
| ATP | 6006 | LMNB1 protein                                                                            | gi 154425605.gi 157074106 | 66,404.60 | 100.00% | 15 | 22 | 26 | 0.27% | 32.40% | LREYEA<br>ALNSK                       | 3.36 | 1,293.68 |
| ATP | 6006 | LMNB1 protein                                                                            | gi 154425605.gi 157074106 | 66,404.60 | 100.00% | 15 | 22 | 26 | 0.27% | 32.40% | LVEVDS<br>GRQIEYE<br>YK               | 2.44 | 1,827.91 |

|     |      |                                                         |                                                                                                                                                           |           |         |    |    |    |       |        |                                                |      |          |
|-----|------|---------------------------------------------------------|-----------------------------------------------------------------------------------------------------------------------------------------------------------|-----------|---------|----|----|----|-------|--------|------------------------------------------------|------|----------|
| ATP | 6006 | LMNB1<br>protein                                        | gi 1544256<br>05,gi 15707<br>4106                                                                                                                         | 66,404.60 | 100.00% | 15 | 22 | 26 | 0.27% | 32.40% | LYKEEL<br>EQTYHA<br>K                          | 4.41 | 1,651.83 |
| ATP | 6006 | LMNB1<br>protein                                        | gi 1544256<br>05,gi 15707<br>4106                                                                                                                         | 66,404.60 | 100.00% | 15 | 22 | 26 | 0.27% | 32.40% | MRIESLS<br>SQLSNL<br>QK                        | 3.01 | 1,749.92 |
| ATP | 6006 | LMNB1<br>protein                                        | gi 1544256<br>05,gi 15707<br>4106                                                                                                                         | 66,404.60 | 100.00% | 15 | 22 | 26 | 0.27% | 32.40% | NMYEEE<br>INETR                                | 3.08 | 1,443.61 |
| ATP | 6006 | LMNB1<br>protein                                        | gi 1544256<br>05,gi 15707<br>4106                                                                                                                         | 66,404.60 | 100.00% | 15 | 22 | 26 | 0.27% | 32.40% | SLESDLE<br>DLKDQI<br>AQLEAS<br>LAAAK           | 5.09 | 2,558.32 |
| ATP | 6006 | LMNB1<br>protein                                        | gi 1544256<br>05,gi 15707<br>4106                                                                                                                         | 66,404.60 | 100.00% | 15 | 22 | 26 | 0.27% | 32.40% | TTIPEEE<br>EEEEEA<br>AEVAVE<br>EELFHQ<br>QGAPR | 4.15 | 3,425.55 |
| ATP | 6006 | RecName<br>:<br>Full=40S<br>ribosomal<br>protein<br>S27 | gi 1088609<br>58,gi 14823<br>1402,gi 858<br>12223,gi 86<br>827527                                                                                         | 9,442.90  | 99.80%  | 2  | 2  | 2  | 0.02% | 31.00% | DLLHPSP<br>EEEKRRK                             | 2.47 | 1,577.83 |
| ATP | 6006 | RecName<br>:<br>Full=40S<br>ribosomal<br>protein<br>S27 | gi 1088609<br>58,gi 14823<br>1402,gi 858<br>12223,gi 86<br>827527                                                                                         | 9,442.90  | 99.80%  | 2  | 2  | 2  | 0.02% | 31.00% | LVQSPN<br>SYFMDV<br>K                          | 2.34 | 1,543.75 |
| ATP | 6006 | CALM3<br>protein                                        | gi 1113085<br>39,gi 11405<br>3089,gi 115<br>305083,gi 1<br>57831834,g<br>i 15787966<br>9,gi 194671<br>098,gi 2818<br>9857,gi 490<br>37473,gi 86<br>822265 | 19,973.60 | 99.80%  | 2  | 2  | 2  | 0.02% | 17.00% | MKDTDS<br>EEEIREA<br>FR                        | 2.65 | 1,871.84 |
| ATP | 6006 | CALM3<br>protein                                        | gi 1113085<br>39,gi 11405<br>3089,gi 115<br>305083,gi 1<br>57831834,g<br>i 15787966<br>9,gi 194671<br>098,gi 2818<br>9857,gi 490<br>37473,gi 86<br>822265 | 19,973.60 | 99.80%  | 2  | 2  | 2  | 0.02% | 17.00% | VFDKDG<br>NGYISA<br>AELR                       | 3.1  | 1,754.87 |

|     |      |                                                                                                                                                                                                                                                                                                               |                                                                     |           |         |   |   |   |       |        |                                      |      |          |
|-----|------|---------------------------------------------------------------------------------------------------------------------------------------------------------------------------------------------------------------------------------------------------------------------------------------------------------------|---------------------------------------------------------------------|-----------|---------|---|---|---|-------|--------|--------------------------------------|------|----------|
| ATP | 6006 | RecName<br>: gi 117120.g<br>Full=Cyt<br>ochrome<br>c oxidase<br>polypepti<br>de 7A2,<br>mitochon<br>drial;<br>AltName:<br>Full=Cyt<br>ochrome<br>c oxidase<br>polypepti<br>de VIIa-<br>liver/hear<br>t;<br>Short=Cy<br>tochrome<br>c oxidase<br>subunit<br>VIIa-L;<br>Short=VI<br>IIC;<br>Flags:<br>Precursor | gi 117120.g<br>: i 28461241,<br>gi 488158.g<br>i 74354141           | 9,305.40  | 99.80%  | 2 | 2 | 2 | 0.02% | 27.70% | GGIADA<br>LLYR                       | 3.17 | 1,048.58 |
| ATP | 6006 | RecName<br>: gi 117120.g<br>Full=Cyt<br>ochrome<br>c oxidase<br>polypepti<br>de 7A2,<br>mitochon<br>drial;<br>AltName:<br>Full=Cyt<br>ochrome<br>c oxidase<br>polypepti<br>de VIIa-<br>liver/hear<br>t;<br>Short=Cy<br>tochrome<br>c oxidase<br>subunit<br>VIIa-L;<br>Short=VI<br>IIC;<br>Flags:<br>Precursor | gi 117120.g<br>: i 28461241,<br>gi 488158.g<br>i 74354141           | 9,305.40  | 99.80%  | 2 | 2 | 2 | 0.02% | 27.70% | LFQEDN<br>GIPVHLK                    | 2.34 | 1,509.81 |
| ATP | 6006 | RecName<br>: gi 1102876<br>Full=NA<br>DPH--<br>cytochro<br>me P450<br>reductase<br>;<br>Short=CP<br>R;<br>Short=P4<br>50R                                                                                                                                                                                     | gi 1102876<br>: 86,gi 14623<br>1834,gi 742<br>68199,gi 78<br>369374 | 77,249.90 | 100.00% | 6 | 6 | 6 | 0.06% | 13.70% | ATTPVI<br>MVGPGT<br>GVAPFIG<br>FIQER | 4.68 | 2,474.31 |



|     |      |                                                                                                                |                                                                   |           |         |   |   |   |       |        |                                         |          |
|-----|------|----------------------------------------------------------------------------------------------------------------|-------------------------------------------------------------------|-----------|---------|---|---|---|-------|--------|-----------------------------------------|----------|
| ATP | 6006 | RecName<br>:<br>Full=NA<br>DPH--<br>cytochro<br>me P450<br>reductase<br>;<br>Short=CP<br>R;<br>Short=P4<br>50R | gi 1102876<br>86,gi 14623<br>1834,gi 742<br>68199,gi 78<br>369374 | 77,249.90 | 100.00% | 6 | 6 | 6 | 0.06% | 13.70% | GMAADP 2.55<br>EEYDLA<br>DLSSLPE<br>IEK | 2,409.10 |
| ATP | 6006 | RecName<br>:<br>Full=NA<br>DPH--<br>cytochro<br>me P450<br>reductase<br>;<br>Short=CP<br>R;<br>Short=P4<br>50R | gi 1102876<br>86,gi 14623<br>1834,gi 742<br>68199,gi 78<br>369374 | 77,249.90 | 100.00% | 6 | 6 | 6 | 0.06% | 13.70% | HLMHLE 3.02<br>LDISDSK                  | 1,553.76 |
| ATP | 6006 | RecName<br>:<br>Full=NA<br>DPH--<br>cytochro<br>me P450<br>reductase<br>;<br>Short=CP<br>R;<br>Short=P4<br>50R | gi 1102876<br>86,gi 14623<br>1834,gi 742<br>68199,gi 78<br>369374 | 77,249.90 | 100.00% | 6 | 6 | 6 | 0.06% | 13.70% | NPFLAV 3.95<br>VTTNR                    | 1,231.68 |
| ATP | 6006 | RecName<br>:<br>Full=NA<br>DPH--<br>cytochro<br>me P450<br>reductase<br>;<br>Short=CP<br>R;<br>Short=P4<br>50R | gi 1102876<br>86,gi 14623<br>1834,gi 742<br>68199,gi 78<br>369374 | 77,249.90 | 100.00% | 6 | 6 | 6 | 0.06% | 13.70% | TALTYY 2.08<br>LDITNPP<br>R             | 1,637.85 |
| ATP | 6006 | RecName<br>:<br>Full=NA<br>DPH--<br>cytochro<br>me P450<br>reductase<br>;<br>Short=CP<br>R;<br>Short=P4<br>50R | gi 1102876<br>86,gi 14623<br>1834,gi 742<br>68199,gi 78<br>369374 | 77,249.90 | 100.00% | 6 | 6 | 6 | 0.06% | 13.70% | YAVFAL 2.52<br>GNK                      | 982.5356 |
| ATP | 6006 | TXNDC1<br>0 protein                                                                                            | gi 1515540<br>48,gi 15612<br>1223                                 | 51,713.50 | 100.00% | 2 | 2 | 2 | 0.02% | 6.61%  | LLKGDG 2.64<br>AYNYRG<br>PR             | 1,635.90 |
| ATP | 6006 | TXNDC1<br>0 protein                                                                                            | gi 1515540<br>48,gi 15612<br>1223                                 | 51,713.50 | 100.00% | 2 | 2 | 2 | 0.02% | 6.61%  | MDATSY 3.8<br>SSIASEF<br>GVR            | 1,736.78 |
| ATP | 6006 | MTCH1<br>protein                                                                                               | gi 1544261<br>80,gi 15707<br>4126                                 | 41,499.70 | 100.00% | 3 | 3 | 3 | 0.03% | 8.74%  | KVLYLP 3.03<br>SFFTYA<br>K              | 1,576.88 |

|     |      |                                                                                                               |                                   |           |         |    |    |    |       |        |                                  |      |          |
|-----|------|---------------------------------------------------------------------------------------------------------------|-----------------------------------|-----------|---------|----|----|----|-------|--------|----------------------------------|------|----------|
| ATP | 6006 | MTCH1<br>protein                                                                                              | gi 1544261<br>80,gi 15707<br>4126 | 41,499.70 | 100.00% | 3  | 3  | 3  | 0.03% | 8.74%  | LMSNAL<br>STVTR                  | 3.05 | 1,208.63 |
| ATP | 6006 | MTCH1<br>protein                                                                                              | gi 1544261<br>80,gi 15707<br>4126 | 41,499.70 | 100.00% | 3  | 3  | 3  | 0.03% | 8.74%  | YSGVLS<br>SIGK                   | 2.05 | 1,010.55 |
| ATP | 6006 | non-<br>muscle<br>myosin<br>heavy<br>chain                                                                    | gi 3205211                        | 72,354.70 | 100.00% | 8  | 10 | 10 | 0.11% | 16.60% | ALEEAM<br>EQKAEL<br>ER           | 3.45 | 1,662.80 |
| ATP | 6006 | non-<br>muscle<br>myosin<br>heavy<br>chain                                                                    | gi 3205211                        | 72,354.70 | 100.00% | 8  | 10 | 10 | 0.11% | 16.60% | ANLQID<br>QLNTDL<br>NLER         | 3.98 | 1,869.97 |
| ATP | 6006 | non-<br>muscle<br>myosin<br>heavy<br>chain                                                                    | gi 3205211                        | 72,354.70 | 100.00% | 8  | 10 | 10 | 0.11% | 16.60% | ELEDAT<br>ETADAM<br>NR           | 2.82 | 1,581.67 |
| ATP | 6006 | non-<br>muscle<br>myosin<br>heavy<br>chain                                                                    | gi 3205211                        | 72,354.70 | 100.00% | 8  | 10 | 10 | 0.11% | 16.60% | ELEDAT<br>ETADAM<br>NREVSS<br>LK | 2.46 | 2,225.02 |
| ATP | 6006 | non-<br>muscle<br>myosin<br>heavy<br>chain                                                                    | gi 3205211                        | 72,354.70 | 100.00% | 8  | 10 | 10 | 0.11% | 16.60% | IAQLEEQ<br>LDNETK<br>ER          | 4.72 | 1,815.91 |
| ATP | 6006 | non-<br>muscle<br>myosin<br>heavy<br>chain                                                                    | gi 3205211                        | 72,354.70 | 100.00% | 8  | 10 | 10 | 0.11% | 16.60% | KFDQLL<br>AEEK                   | 2.69 | 1,220.65 |
| ATP | 6006 | non-<br>muscle<br>myosin<br>heavy<br>chain                                                                    | gi 3205211                        | 72,354.70 | 100.00% | 8  | 10 | 10 | 0.11% | 16.60% | QISTLHA<br>QVTDMR                | 2.2  | 1,515.76 |
| ATP | 6006 | non-<br>muscle<br>myosin<br>heavy<br>chain                                                                    | gi 3205211                        | 72,354.70 | 100.00% | 8  | 10 | 10 | 0.11% | 16.60% | QLEEAE<br>EEAQRA<br>NASR         | 2.94 | 1,830.86 |
| ATP | 6006 | PREDIC<br>TED:<br>08<br>similar to<br>keratin 2<br>(epiderm<br>al<br>ichthyosi<br>s bullosa<br>of<br>Siemens) | gi 1198921<br>08                  | 64,293.10 | 99.80%  | 2  | 3  | 5  | 0.05% | 3.89%  | FLEQQN<br>QVLQTK                 | 4.12 | 1,475.79 |
| ATP | 6006 | PREDIC<br>TED:<br>08<br>similar to<br>keratin 2<br>(epiderm<br>al<br>ichthyosi<br>s bullosa<br>of<br>Siemens) | gi 1198921<br>08                  | 64,293.10 | 99.80%  | 2  | 3  | 5  | 0.05% | 3.89%  | TAAENE<br>FVTLKK                 | 3.04 | 1,350.73 |
| ATP | 6006 | RPN1<br>protein                                                                                               | gi 1267173<br>91,gi 12927<br>7520 | 68,335.00 | 100.00% | 14 | 18 | 25 | 0.26% | 31.70% | AASFLL<br>ALEPELE<br>AR          | 4.03 | 1,629.88 |

|     |      |                                                                                                 |                                   |            |         |    |    |    |       |        |                                                                      |          |
|-----|------|-------------------------------------------------------------------------------------------------|-----------------------------------|------------|---------|----|----|----|-------|--------|----------------------------------------------------------------------|----------|
| ATP | 6006 | RPN1<br>protein                                                                                 | gi 1267173<br>91.gi 12927<br>7520 | 68,335.00  | 100.00% | 14 | 18 | 25 | 0.26% | 31.70% | DTYIENE 2.82<br>KLISGK                                               | 1,509.78 |
| ATP | 6006 | RPN1<br>protein                                                                                 | gi 1267173<br>91.gi 12927<br>7520 | 68,335.00  | 100.00% | 14 | 18 | 25 | 0.26% | 31.70% | FTVKLP 3.24<br>VALDPG<br>AK                                          | 1,602.93 |
| ATP | 6006 | RPN1<br>protein                                                                                 | gi 1267173<br>91.gi 12927<br>7520 | 68,335.00  | 100.00% | 14 | 18 | 25 | 0.26% | 31.70% | HFDETV 3.15<br>NRYK                                                  | 1,308.63 |
| ATP | 6006 | RPN1<br>protein                                                                                 | gi 1267173<br>91.gi 12927<br>7520 | 68,335.00  | 100.00% | 14 | 18 | 25 | 0.26% | 31.70% | IDHILDA 2.26<br>L                                                    | 909.5042 |
| ATP | 6006 | RPN1<br>protein                                                                                 | gi 1267173<br>91.gi 12927<br>7520 | 68,335.00  | 100.00% | 14 | 18 | 25 | 0.26% | 31.70% | ISVIVEA 3.17<br>VYTHVL<br>QPYPYPTQI<br>TQSEK                         | 2,843.52 |
| ATP | 6006 | RPN1<br>protein                                                                                 | gi 1267173<br>91.gi 12927<br>7520 | 68,335.00  | 100.00% | 14 | 18 | 25 | 0.26% | 31.70% | LPVALD 2.09<br>PGAK                                                  | 980.5777 |
| ATP | 6006 | RPN1<br>protein                                                                                 | gi 1267173<br>91.gi 12927<br>7520 | 68,335.00  | 100.00% | 14 | 18 | 25 | 0.26% | 31.70% | LVDHVF 3.06<br>DEQVIDS<br>LTVK                                       | 1,957.03 |
| ATP | 6006 | RPN1<br>protein                                                                                 | gi 1267173<br>91.gi 12927<br>7520 | 68,335.00  | 100.00% | 14 | 18 | 25 | 0.26% | 31.70% | NIQVDSP 3.37<br>YEISR                                                | 1,420.71 |
| ATP | 6006 | RPN1<br>protein                                                                                 | gi 1267173<br>91.gi 12927<br>7520 | 68,335.00  | 100.00% | 14 | 18 | 25 | 0.26% | 31.70% | QFVVFE 3.13<br>GNHYFY<br>SPYPTK                                      | 2,223.05 |
| ATP | 6006 | RPN1<br>protein                                                                                 | gi 1267173<br>91.gi 12927<br>7520 | 68,335.00  | 100.00% | 14 | 18 | 25 | 0.26% | 31.70% | SEDLLD 3.51<br>YGPFR                                                 | 1,311.62 |
| ATP | 6006 | RPN1<br>protein                                                                                 | gi 1267173<br>91.gi 12927<br>7520 | 68,335.00  | 100.00% | 14 | 18 | 25 | 0.26% | 31.70% | VHSENN 4.5<br>SPFLTIT<br>SMTR                                        | 1,949.94 |
| ATP | 6006 | RPN1<br>protein                                                                                 | gi 1267173<br>91.gi 12927<br>7520 | 68,335.00  | 100.00% | 14 | 18 | 25 | 0.26% | 31.70% | VTAEVV 5.85<br>LAHAGS<br>GSSPR                                       | 1,637.86 |
| ATP | 6006 | RPN1<br>protein                                                                                 | gi 1267173<br>91.gi 12927<br>7520 | 68,335.00  | 100.00% | 14 | 18 | 25 | 0.26% | 31.70% | YDYQRQ 2.58<br>PDSGVS<br>SVR                                         | 1,756.82 |
| ATP | 6006 | PREDIC<br>TED:<br>similar to<br>tetraspani<br>n 9                                               | gi 1198931<br>28                  | 26,633.40  | 99.80%  | 2  | 2  | 2  | 0.02% | 23.80% | DLKEGL 3.3<br>LLYNSE<br>NNVGLK                                       | 2,019.08 |
| ATP | 6006 | PREDIC<br>TED:<br>similar to<br>tetraspani<br>n 9                                               | gi 1198931<br>28                  | 26,633.40  | 99.80%  | 2  | 2  | 2  | 0.02% | 23.80% | VTQWFA 2.77<br>DNKHVL<br>GTVGMC<br>LLITQIL<br>GMAFSM<br>TLFQHIH<br>R | 4,473.29 |
| ATP | 6006 | Family<br>with<br>sequence<br>similarity<br>62 (C2<br>domain<br>containin<br>g),<br>member<br>A | gi 1173061<br>90.gi 11815<br>0984 | 123,012.90 | 100.00% | 6  | 7  | 7  | 0.07% | 8.32%  | ALTLGA 2.92<br>LTLPLAR                                               | 1,309.82 |

|     |      |                                                                     |                                              |            |         |   |   |   |       |       |                                   |      |          |
|-----|------|---------------------------------------------------------------------|----------------------------------------------|------------|---------|---|---|---|-------|-------|-----------------------------------|------|----------|
| ATP | 6006 | Family with sequence similarity 62 (C2 domain containing), member A | gi 117306190,gi 118150984                    | 123,012.90 | 100.00% | 6 | 7 | 7 | 0.07% | 8.32% | GNKEPN<br>PMVQLSI<br>QDVTQE<br>SK | 5.01 | 2,358.16 |
| ATP | 6006 | Family with sequence similarity 62 (C2 domain containing), member A | gi 117306190,gi 118150984                    | 123,012.90 | 100.00% | 6 | 7 | 7 | 0.07% | 8.32% | LHVLEA<br>QDLIAK                  | 3.64 | 1,349.78 |
| ATP | 6006 | Family with sequence similarity 62 (C2 domain containing), member A | gi 117306190,gi 118150984                    | 123,012.90 | 100.00% | 6 | 7 | 7 | 0.07% | 8.32% | LLAETV<br>APAVR                   | 2.79 | 1,139.68 |
| ATP | 6006 | Family with sequence similarity 62 (C2 domain containing), member A | gi 117306190,gi 118150984                    | 123,012.90 | 100.00% | 6 | 7 | 7 | 0.07% | 8.32% | LLVPLVP<br>DLQDVA<br>QLR          | 2.79 | 1,789.06 |
| ATP | 6006 | Family with sequence similarity 62 (C2 domain containing), member A | gi 117306190,gi 118150984                    | 123,012.90 | 100.00% | 6 | 7 | 7 | 0.07% | 8.32% | LTHSDSP<br>PEAPAG<br>PLGQVK       | 3.45 | 1,900.98 |
| ATP | 6006 | CD9 molecule                                                        | gi 151556398,gi 162821,gi 27806911,gi 399217 | 25,240.80  | 99.80%  | 2 | 2 | 4 | 0.04% | 6.19% | EVQKFY<br>EDTYNK<br>LK            | 2.6  | 1,804.91 |
| ATP | 6006 | CD9 molecule                                                        | gi 151556398,gi 162821,gi 27806911,gi 399217 | 25,240.80  | 99.80%  | 2 | 2 | 4 | 0.04% | 6.19% | FYEDTY<br>NKLK                    | 2.49 | 1,320.65 |
| ATP | 6006 | GANAB protein                                                       | gi 151553519,gi 194679898                    | 109,455.80 | 100.00% | 2 | 2 | 2 | 0.02% | 3.31% | LSFQHD<br>PETSVELI<br>LR          | 4.21 | 1,754.94 |
| ATP | 6006 | GANAB protein                                                       | gi 151553519,gi 194679898                    | 109,455.80 | 100.00% | 2 | 2 | 2 | 0.02% | 3.31% | VVIIGAG<br>KPATVV<br>LQTK         | 3.33 | 1,694.06 |
| ATP | 6006 | Myosin ID                                                           | gi 109659303,gi 115497786,gi 122145769       | 115,924.40 | 100.00% | 4 | 4 | 4 | 0.04% | 4.97% | DVIDKQ<br>HTEQEA<br>SYGR          | 3.81 | 1,875.88 |

|     |      |                                                                                                                                                                                         |                                        |            |         |   |   |   |       |       |                                    |      |          |
|-----|------|-----------------------------------------------------------------------------------------------------------------------------------------------------------------------------------------|----------------------------------------|------------|---------|---|---|---|-------|-------|------------------------------------|------|----------|
| ATP | 6006 | Myosin ID                                                                                                                                                                               | gi 109659303,gi 115497786,gi 122145769 | 115,924.40 | 100.00% | 4 | 4 | 4 | 0.04% | 4.97% | LNQPQP<br>DFTK                     | 2.6  | 1,187.61 |
| ATP | 6006 | Myosin ID                                                                                                                                                                               | gi 109659303,gi 115497786,gi 122145769 | 115,924.40 | 100.00% | 4 | 4 | 4 | 0.04% | 4.97% | SFHSFYQ<br>LLQGGS<br>DQMLR         | 4.31 | 2,130.01 |
| ATP | 6006 | Myosin ID                                                                                                                                                                               | gi 109659303,gi 115497786,gi 122145769 | 115,924.40 | 100.00% | 4 | 4 | 4 | 0.04% | 4.97% | TVATGR<br>DVIDKQ<br>HTEQEA<br>SYGR | 3.1  | 2,461.21 |
| ATP | 6006 | Chromosome 20 open reading frame 3 ortholog                                                                                                                                             | gi 74268319,gi 78369434                | 46,074.40  | 99.80%  | 2 | 2 | 2 | 0.02% | 7.28% | GGADV<br>VENLPG<br>FPDNIR          | 2.55 | 1,916.95 |
| ATP | 6006 | Chromosome 20 open reading frame 3 ortholog                                                                                                                                             | gi 74268319,gi 78369434                | 46,074.40  | 99.80%  | 2 | 2 | 2 | 0.02% | 7.28% | LLLSSET<br>PIEGR                   | 3.93 | 1,314.73 |
| ATP | 6006 | PREDICTED: similar to Alpha-mannosidase 2 (Alpha-mannosidase II) (Mannosyl-oligosaccharide 1,3-1,6-alpha-mannosidase) (MAN II) (Golgi alpha-mannosidase II) (Mannosidase alpha class 2A | gi 119896006                           | 130,855.40 | 100.00% | 2 | 2 | 2 | 0.02% | 1.48% | TTVVLA<br>PLGDDF<br>R              | 3.37 | 1,403.75 |

|     |      |                                                                                                                                                                                                                  |                                                                                                                                           |            |         |   |   |   |       |        |                                  |      |          |
|-----|------|------------------------------------------------------------------------------------------------------------------------------------------------------------------------------------------------------------------|-------------------------------------------------------------------------------------------------------------------------------------------|------------|---------|---|---|---|-------|--------|----------------------------------|------|----------|
| ATP | 6006 | PREDIC TED: 06<br>similar to<br>Alpha-mannosidase 2<br>(Alpha-mannosidase II)<br>(Mannosyl-oligosaccharide 1,3-1,6-alpha-mannosidase)<br>(MAN II)<br>(Golgi alpha-mannosidase II)<br>(Mannosidase alpha class 2A | gi 1198960                                                                                                                                | 130,855.40 | 100.00% | 2 | 2 | 2 | 0.02% | 1.48%  | TTVVLA<br>PLGDDF<br>RYTER        | 2.91 | 1,953.01 |
| ATP | 6006 | RecName : Full=Cytochrome c oxidase subunit 4 isoform 1, mitochondrial; AltName: Full=Cytochrome c oxidase subunit IV isoform 1; Short=Cytochrome c oxidase polypeptide IV;                                      | gi 117085.gi 14924153<br>9,gi 149241552,gi 149241569,gi 149241582,gi 149241599,gi 149241612,gi 47824862,gi 506389,gi 59858423,gi 74354123 | 19,554.00  | 100.00% | 5 | 6 | 7 | 0.07% | 24.30% | AHGSVV<br>KSEDYA<br>LPSYVD<br>RR | 3.68 | 2,249.13 |

|     |      |                                                                                                                                                                                                                                                                                                                                                                                                                                        |           |         |   |   |   |       |        |                     |          |
|-----|------|----------------------------------------------------------------------------------------------------------------------------------------------------------------------------------------------------------------------------------------------------------------------------------------------------------------------------------------------------------------------------------------------------------------------------------------|-----------|---------|---|---|---|-------|--------|---------------------|----------|
| ATP | 6006 | RecName gi 117085.g<br>: i 14924153<br>Full=Cyt 9,gi 149241<br>ochrome 552,gi 1492<br>c oxidase 41569,gi 14<br>subunit 4 9241582,gi <br>isoform 149241599,<br>1, gi 1492416<br>mitochon 12,gi 47824<br>drial; 862,gi 5063<br>AltName: 89,gi 59858<br>Full=Cyt 423,gi 7435<br>ochrome 4123<br>c oxidase<br>subunit<br>IV<br>isoform<br>1;<br>Short=C<br>OX IV-1;<br>AltName:<br>Full=Cyt<br>ochrome<br>c oxidase<br>polypepti<br>de IV; | 19,554.00 | 100.00% | 5 | 6 | 7 | 0.07% | 24.30% | DYPLPD 1.8<br>VAHVK | 1,253.65 |
| ATP | 6006 | RecName gi 117085.g<br>: i 14924153<br>Full=Cyt 9,gi 149241<br>ochrome 552,gi 1492<br>c oxidase 41569,gi 14<br>subunit 4 9241582,gi <br>isoform 149241599,<br>1, gi 1492416<br>mitochon 12,gi 47824<br>drial; 862,gi 5063<br>AltName: 89,gi 59858<br>Full=Cyt 423,gi 7435<br>ochrome 4123<br>c oxidase<br>subunit<br>IV<br>isoform<br>1;<br>Short=C<br>OX IV-1;<br>AltName:<br>Full=Cyt<br>ochrome<br>c oxidase<br>polypepti<br>de IV; | 19,554.00 | 100.00% | 5 | 6 | 7 | 0.07% | 24.30% | FKESFAE 2.37<br>MNR | 1,274.58 |

|     |      |                                                                                                                                                                                                                                                                                      |                                                                                                                                                                                       |           |         |   |    |    |       |        |                                 |      |          |
|-----|------|--------------------------------------------------------------------------------------------------------------------------------------------------------------------------------------------------------------------------------------------------------------------------------------|---------------------------------------------------------------------------------------------------------------------------------------------------------------------------------------|-----------|---------|---|----|----|-------|--------|---------------------------------|------|----------|
| ATP | 6006 | RecName<br>:<br>Full=Cyt<br>ochrome<br>c oxidase<br>subunit 4<br>isoform<br>1,<br>mitochon<br>drial;<br>AltName:<br>Full=Cyt<br>ochrome<br>c oxidase<br>subunit<br>IV<br>isoform<br>1;<br>Short=C<br>OX IV-1;<br>AltName:<br>Full=Cyt<br>ochrome<br>c oxidase<br>polypepti<br>de IV; | gi 117085.g<br>i 14924153<br>9,gi 149241<br>552,gi 1492<br>41569,gi 14<br>9241582,gi <br>149241599,<br>gi 1492416<br>12,gi 47824<br>862,gi 5063<br>89,gi 59858<br>423,gi 7435<br>4123 | 19,554.00 | 100.00% | 5 | 6  | 7  | 0.07% | 24.30% | SEDYAL<br>PSYVDR                | 3.26 | 1,414.65 |
| ATP | 6006 | RecName<br>:<br>Full=Cyt<br>ochrome<br>c oxidase<br>subunit 4<br>isoform<br>1,<br>mitochon<br>drial;<br>AltName:<br>Full=Cyt<br>ochrome<br>c oxidase<br>polypepti<br>de IV;                                                                                                          | gi 117085.g<br>i 14924153<br>9,gi 149241<br>552,gi 1492<br>41569,gi 14<br>9241582,gi <br>149241599,<br>gi 1492416<br>12,gi 47824<br>862,gi 5063<br>89,gi 59858<br>423,gi 7435<br>4123 | 19,554.00 | 100.00% | 5 | 6  | 7  | 0.07% | 24.30% | SEDYAL<br>PSYVDR<br>R           | 2.05 | 1,570.75 |
| ATP | 6006 | Canx<br>protein                                                                                                                                                                                                                                                                      | gi 1572791<br>43,gi 15778<br>5567                                                                                                                                                     | 67,759.10 | 100.00% | 9 | 13 | 18 | 0.19% | 15.00% | APVPTG<br>EVYFAD<br>SFDR        | 3.2  | 1,770.83 |
| ATP | 6006 | Canx<br>protein                                                                                                                                                                                                                                                                      | gi 1572791<br>43,gi 15778<br>5567                                                                                                                                                     | 67,759.10 | 100.00% | 9 | 13 | 18 | 0.19% | 15.00% | IPNPDDF<br>EDLEPFK              | 2.35 | 1,707.83 |
| ATP | 6006 | Canx<br>protein                                                                                                                                                                                                                                                                      | gi 1572791<br>43,gi 15778<br>5567                                                                                                                                                     | 67,759.10 | 100.00% | 9 | 13 | 18 | 0.19% | 15.00% | KIPNPDF<br>FEDLEPF<br>K         | 4.69 | 1,835.92 |
| ATP | 6006 | Canx<br>protein                                                                                                                                                                                                                                                                      | gi 1572791<br>43,gi 15778<br>5567                                                                                                                                                     | 67,759.10 | 100.00% | 9 | 13 | 18 | 0.19% | 15.00% | LPGDKG<br>LVLMSR                | 3.6  | 1,301.72 |
| ATP | 6006 | Canx<br>protein                                                                                                                                                                                                                                                                      | gi 1572791<br>43,gi 15778<br>5567                                                                                                                                                     | 67,759.10 | 100.00% | 9 | 13 | 18 | 0.19% | 15.00% | TDAPQP<br>DVKEDE<br>EEKEEE<br>K | 3.49 | 2,245.00 |



|     |      |                                                  |                           |            |         |    |    |    |       |        |                            |      |          |
|-----|------|--------------------------------------------------|---------------------------|------------|---------|----|----|----|-------|--------|----------------------------|------|----------|
| ATP | 6006 | Canx protein                                     | gi 157279143,gi 157785567 | 67,759.10  | 100.00% | 9  | 13 | 18 | 0.19% | 15.00% | TPELNL DQFHDK              | 4.23 | 1,456.71 |
| ATP | 6006 | Canx protein                                     | gi 157279143,gi 157785567 | 67,759.10  | 100.00% | 9  | 13 | 18 | 0.19% | 15.00% | TPELNL DQFHDK TPYTIMF GPKD | 4.03 | 2,723.30 |
| ATP | 6006 | Canx protein                                     | gi 157279143,gi 157785567 | 67,759.10  | 100.00% | 9  | 13 | 18 | 0.19% | 15.00% | TPYTIMF GPKD               | 3.47 | 1,285.61 |
| ATP | 6006 | Canx protein                                     | gi 157279143,gi 157785567 | 67,759.10  | 100.00% | 9  | 13 | 18 | 0.19% | 15.00% | VTYKAP VPTGEV YFADSF DR    | 4.13 | 2,262.11 |
| ATP | 6006 | embryo-specific fibronectin 1 transcript variant | gi 220028657,gi 76610126  | 262,401.30 | 100.00% | 14 | 19 | 23 | 0.24% | 11.00% | GATYNII VEAVK              | 2.61 | 1,277.71 |
| ATP | 6006 | embryo-specific fibronectin 1 transcript variant | gi 220028657,gi 76610126  | 262,401.30 | 100.00% | 14 | 19 | 23 | 0.24% | 11.00% | GDSPAS SKPVSIN YR          | 2.8  | 1,577.79 |
| ATP | 6006 | embryo-specific fibronectin 1 transcript variant | gi 220028657,gi 76610126  | 262,401.30 | 100.00% | 14 | 19 | 23 | 0.24% | 11.00% | GLRPGV VYEQQL ISVQHY GQR   | 5.36 | 2,356.25 |
| ATP | 6006 | embryo-specific fibronectin 1 transcript variant | gi 220028657,gi 76610126  | 262,401.30 | 100.00% | 14 | 19 | 23 | 0.24% | 11.00% | NLQPGS EYAVSL VAVK         | 3.16 | 1,674.91 |
| ATP | 6006 | embryo-specific fibronectin 1 transcript variant | gi 220028657,gi 76610126  | 262,401.30 | 100.00% | 14 | 19 | 23 | 0.24% | 11.00% | NTFAEV TGLSPG VTYHFK       | 3.82 | 1,967.99 |
| ATP | 6006 | embryo-specific fibronectin 1 transcript variant | gi 220028657,gi 76610126  | 262,401.30 | 100.00% | 14 | 19 | 23 | 0.24% | 11.00% | QYNVGP AASQYP LR           | 3.44 | 1,563.79 |
| ATP | 6006 | embryo-specific fibronectin 1 transcript variant | gi 220028657,gi 76610126  | 262,401.30 | 100.00% | 14 | 19 | 23 | 0.24% | 11.00% | RPGAEP GNEGST AHSYNQ YSQR  | 5.56 | 2,406.08 |
| ATP | 6006 | embryo-specific fibronectin 1 transcript variant | gi 220028657,gi 76610126  | 262,401.30 | 100.00% | 14 | 19 | 23 | 0.24% | 11.00% | SSPVVID ASTAIDA PSNLR      | 3.87 | 1,913.00 |
| ATP | 6006 | embryo-specific fibronectin 1 transcript variant | gi 220028657,gi 76610126  | 262,401.30 | 100.00% | 14 | 19 | 23 | 0.24% | 11.00% | SYTITGL QPGTDY K           | 3.67 | 1,543.76 |

|     |      |                                                  |                                       |            |         |    |    |    |       |        |                                                                  |      |          |
|-----|------|--------------------------------------------------|---------------------------------------|------------|---------|----|----|----|-------|--------|------------------------------------------------------------------|------|----------|
| ATP | 6006 | embryo-specific fibronectin 1 transcript variant | gi 220028657,gi 76610126              | 262,401.30 | 100.00% | 14 | 19 | 23 | 0.24% | 11.00% | SYTITGL<br>QPGTDY<br>KIHLTYL<br>NDNAR                            | 4.39 | 2,854.44 |
| ATP | 6006 | embryo-specific fibronectin 1 transcript variant | gi 220028657,gi 76610126              | 262,401.30 | 100.00% | 14 | 19 | 23 | 0.24% | 11.00% | TEIDKPS<br>QMQVT<br>DVQDNS<br>ISVR                               | 6.14 | 2,506.21 |
| ATP | 6006 | embryo-specific fibronectin 1 transcript variant | gi 220028657,gi 76610126              | 262,401.30 | 100.00% | 14 | 19 | 23 | 0.24% | 11.00% | TKTETIT<br>GFQVDA<br>IPANGQT<br>PIQR                             | 3.59 | 2,586.35 |
| ATP | 6006 | embryo-specific fibronectin 1 transcript variant | gi 220028657,gi 76610126              | 262,401.30 | 100.00% | 14 | 19 | 23 | 0.24% | 11.00% | TPFITNP<br>GYDTGN<br>GIQLPGT<br>SGQQPS<br>LGQQMI<br>FEEHGF<br>RR | 3.16 | 4,392.11 |
| ATP | 6006 | embryo-specific fibronectin 1 transcript variant | gi 220028657,gi 76610126              | 262,401.30 | 100.00% | 14 | 19 | 23 | 0.24% | 11.00% | VPGTSA<br>SATLTG<br>LTR                                          | 4.51 | 1,431.78 |
| ATP | 6006 | nicalin 44,903                                   | gi 115494944,gi 94534903              | 63,091.10  | 100.00% | 3  | 5  | 5  | 0.05% | 8.72%  | AAQLVD<br>KDGTF<br>STLEHY<br>LSR                                 | 4.31 | 2,364.22 |
| ATP | 6006 | nicalin 44,903                                   | gi 115494944,gi 94534903              | 63,091.10  | 100.00% | 3  | 5  | 5  | 0.05% | 8.72%  | MQQYDL<br>QGQPYG<br>TR                                           | 3.8  | 1,700.77 |
| ATP | 6006 | nicalin 44,903                                   | gi 115494944,gi 94534903              | 63,091.10  | 100.00% | 3  | 5  | 5  | 0.05% | 8.72%  | RLPAFTL<br>SHLQSH<br>R                                           | 3.47 | 1,662.92 |
| ATP | 6006 | translocase of outer mitochondrial membrane 40   | gi 115495635,gi 122134275,gi 94534905 | 37,707.00  | 100.00% | 4  | 5  | 6  | 0.06% | 18.60% | KLPPLPL<br>TLALGA<br>FLNHR                                       | 2.43 | 1,971.19 |
| ATP | 6006 | translocase of outer mitochondrial membrane 40   | gi 115495635,gi 122134275,gi 94534905 | 37,707.00  | 100.00% | 4  | 5  | 6  | 0.06% | 18.60% | KLPPLPL<br>TLALGA<br>FLNHRK                                      | 2.95 | 2,099.29 |
| ATP | 6006 | translocase of outer mitochondrial membrane 40   | gi 115495635,gi 122134275,gi 94534905 | 37,707.00  | 100.00% | 4  | 5  | 6  | 0.06% | 18.60% | QLSPTEA<br>FPVLVG<br>DMDNSG<br>SLNAQVI<br>HQLGPG<br>LR           | 3.71 | 3,576.81 |
| ATP | 6006 | translocase of outer mitochondrial membrane 40   | gi 115495635,gi 122134275,gi 94534905 | 37,707.00  | 100.00% | 4  | 5  | 6  | 0.06% | 18.60% | RPGEEG<br>AVMSLA<br>GK                                           | 2.81 | 1,417.71 |

|     |      |                                                                   |              |            |         |    |    |    |       |        |                                                 |      |          |
|-----|------|-------------------------------------------------------------------|--------------|------------|---------|----|----|----|-------|--------|-------------------------------------------------|------|----------|
| ATP | 6006 | PREDICTED: ATPase, Ca++ transporting, plasma membrane 4 isoform 5 | gi 119908026 | 133,777.70 | 100.00% | 10 | 10 | 10 | 0.11% | 10.90% | AFHSSL<br>HESIQKP<br>K                          | 2.76 | 1,608.85 |
| ATP | 6006 | PREDICTED: ATPase, Ca++ transporting, plasma membrane 4 isoform 5 | gi 119908026 | 133,777.70 | 100.00% | 10 | 10 | 10 | 0.11% | 10.90% | GIIDSTV<br>GDQR                                 | 3.18 | 1,160.59 |
| ATP | 6006 | PREDICTED: ATPase, Ca++ transporting, plasma membrane 4 isoform 5 | gi 119908026 | 133,777.70 | 100.00% | 10 | 10 | 10 | 0.11% | 10.90% | IDESSLT<br>GESDHV<br>K                          | 2.32 | 1,516.71 |
| ATP | 6006 | PREDICTED: ATPase, Ca++ transporting, plasma membrane 4 isoform 5 | gi 119908026 | 133,777.70 | 100.00% | 10 | 10 | 10 | 0.11% | 10.90% | LKTNPV<br>EGLSGN<br>PADLEK                      | 5.01 | 1,881.99 |
| ATP | 6006 | PREDICTED: ATPase, Ca++ transporting, plasma membrane 4 isoform 5 | gi 119908026 | 133,777.70 | 100.00% | 10 | 10 | 10 | 0.11% | 10.90% | QVVAVT<br>GDGTND<br>GPALK                       | 3.35 | 1,641.84 |
| ATP | 6006 | PREDICTED: ATPase, Ca++ transporting, plasma membrane 4 isoform 5 | gi 119908026 | 133,777.70 | 100.00% | 10 | 10 | 10 | 0.11% | 10.90% | QVVAVT<br>GDGTND<br>GPALKK                      | 2.17 | 1,769.94 |
| ATP | 6006 | PREDICTED: ATPase, Ca++ transporting, plasma membrane 4 isoform 5 | gi 119908026 | 133,777.70 | 100.00% | 10 | 10 | 10 | 0.11% | 10.90% | RAPLHSP<br>PSQHYTI<br>IFNTFVL<br>MQLFNE<br>INSR | 3.62 | 3,686.89 |

|     |      |                                                                    |                                                                                           |            |         |    |    |    |       |        |                               |      |          |
|-----|------|--------------------------------------------------------------------|-------------------------------------------------------------------------------------------|------------|---------|----|----|----|-------|--------|-------------------------------|------|----------|
| ATP | 6006 | PREDIC TED: ATPase, Ca++ transporting, plasma membrane 4 isoform 5 | gi 119908026                                                                              | 133,777.70 | 100.00% | 10 | 10 | 10 | 0.11% | 10.90% | TNPVEG LSGNPA DLEK            | 3.31 | 1,640.81 |
| ATP | 6006 | PREDIC TED: ATPase, Ca++ transporting, plasma membrane 4 isoform 5 | gi 119908026                                                                              | 133,777.70 | 100.00% | 10 | 10 | 10 | 0.11% | 10.90% | TQDGVA LEIQPLN SQEGIDS EEKEK  | 3    | 2,757.34 |
| ATP | 6006 | PREDIC TED: ATPase, Ca++ transporting, plasma membrane 4 isoform 5 | gi 119908026                                                                              | 133,777.70 | 100.00% | 10 | 10 | 10 | 0.11% | 10.90% | TQDGVA LEIQPLN SQEGIDS EEKEKK | 4.56 | 2,885.44 |
| ATP | 6006 | PREDIC TED: similar to histone H2aj                                | gi 119915559,gi 119915725,gi 11991939855,gi 198282091,gi 76619954,gi 76631269,gi 76633542 | 14,074.00  | 100.00% | 3  | 4  | 9  | 0.09% | 26.90% | AGLQFP VGR                    | 3.16 | 944.5313 |
| ATP | 6006 | PREDIC TED: similar to histone H2aj                                | gi 119915559,gi 119915725,gi 11991939855,gi 198282091,gi 76619954,gi 76631269,gi 76633542 | 14,074.00  | 100.00% | 3  | 4  | 9  | 0.09% | 26.90% | HLQLAIR                       | 2.43 | 850.5258 |
| ATP | 6006 | PREDIC TED: similar to histone H2aj                                | gi 119915559,gi 119915725,gi 11991939855,gi 198282091,gi 76619954,gi 76631269,gi 76633542 | 14,074.00  | 100.00% | 3  | 4  | 9  | 0.09% | 26.90% | VTIAQG GVLPNIQ AVLLPK         | 5.02 | 1,931.17 |
| ATP | 6006 | phosphatidic acid phosphate type 2A                                | gi 122692411,gi 81674095                                                                  | 32,253.70  | 99.80%  | 2  | 4  | 5  | 0.05% | 10.20% | KEEDSH TTLHETP TTGNHYR        | 4.37 | 2,353.08 |
| ATP | 6006 | phosphatidic acid phosphate type 2A                                | gi 122692411,gi 81674095                                                                  | 32,253.70  | 99.80%  | 2  | 4  | 5  | 0.05% | 10.20% | NNYIATI YK                    | 2.41 | 1,099.58 |

|     |      |                                                                                                                                                                                                                              |                                                   |           |         |    |    |    |       |        |                                                  |      |          |
|-----|------|------------------------------------------------------------------------------------------------------------------------------------------------------------------------------------------------------------------------------|---------------------------------------------------|-----------|---------|----|----|----|-------|--------|--------------------------------------------------|------|----------|
| ATP | 6006 | Plexin domain containin g 2                                                                                                                                                                                                  | gi 117306639,gi 118150958                         | 59,450.20 | 99.80%  | 2  | 2  | 2  | 0.02% | 5.08%  | VGLSDA<br>FVVVHR                                 | 3.76 | 1,298.72 |
| ATP | 6006 | Plexin domain containin g 2                                                                                                                                                                                                  | gi 117306639,gi 118150958                         | 59,450.20 | 99.80%  | 2  | 2  | 2  | 0.02% | 5.08%  | VNLSFD<br>FPFYGHF<br>LR                          | 2.59 | 1,858.93 |
| ATP | 6006 | NADH dehydrog enase (ubiquino ne) 1 alpha subcompl ex, 4, 9kDa                                                                                                                                                               | gi 28461259,gi 400648,gi 560,gi 73586733          | 9,307.30  | 99.80%  | 2  | 2  | 2  | 0.02% | 22.00% | FYSVNV<br>DYSK                                   | 2.92 | 1,221.58 |
| ATP | 6006 | NADH dehydrog enase (ubiquino ne) 1 alpha subcompl ex, 4, 9kDa                                                                                                                                                               | gi 28461259,gi 400648,gi 560,gi 73586733          | 9,307.30  | 99.80%  | 2  | 2  | 2  | 0.02% | 22.00% | LGPNDQ<br>YKFYSV<br>NVDYSK                       | 2.84 | 2,137.02 |
| ATP | 6006 | RecName : Full=Doli chyl- diphosph ooligosac charide-- protein glycosyltr ansferase subunit 2; AltName: Full=Doli chyl- diphosph ooligosac charide-- protein glycosyltr ansferase 63 kDa subunit; AltName: Full=Rib ophorin- | gi 122140231,gi 146231756,gi 74267729,gi 77736155 | 69,197.20 | 100.00% | 12 | 17 | 23 | 0.24% | 30.90% | ASLDRPF<br>TSLESFAF<br>YSIVGLS<br>SLGAQV<br>PDVK | 2.46 | 3,254.69 |

|     |      |                                                                                                                                                                                                                                                                                                                    |                                                                   |           |         |    |    |    |       |        |                                                 |          |
|-----|------|--------------------------------------------------------------------------------------------------------------------------------------------------------------------------------------------------------------------------------------------------------------------------------------------------------------------|-------------------------------------------------------------------|-----------|---------|----|----|----|-------|--------|-------------------------------------------------|----------|
| ATP | 6006 | RecName gi 1221402<br>:<br>Full=Doli<br>chyl-<br>diphosph<br>ooligosac<br>charide--<br>protein<br>glycosyltr<br>ansferase<br>subunit<br>2;<br>AltName:<br>Full=Doli<br>chyl-<br>diphosph<br>ooligosac<br>charide--<br>protein<br>glycosyltr<br>ansferase<br>63 kDa<br>subunit;<br>AltName:<br>Full=Rib<br>ophorin- | gi 1221402<br>31.gi 14623<br>1756.gi 742<br>67729.gi 77<br>736155 | 69,197.20 | 100.00% | 12 | 17 | 23 | 0.24% | 30.90% | ISTEVGI 2.65<br>TNVDLS<br>TVDKDQ<br>SIAPK       | 2,530.33 |
| ATP | 6006 | RecName gi 1221402<br>:<br>Full=Doli<br>chyl-<br>diphosph<br>ooligosac<br>charide--<br>protein<br>glycosyltr<br>ansferase<br>subunit<br>2;<br>AltName:<br>Full=Doli<br>chyl-<br>diphosph<br>ooligosac<br>charide--<br>protein<br>glycosyltr<br>ansferase<br>63 kDa<br>subunit;<br>AltName:<br>Full=Rib<br>ophorin- | gi 1221402<br>31.gi 14623<br>1756.gi 742<br>67729.gi 77<br>736155 | 69,197.20 | 100.00% | 12 | 17 | 23 | 0.24% | 30.90% | LMDHVG 4.01<br>TEPSIKE<br>DQVIQL<br>MNAIFS<br>K | 2,959.49 |

|     |      |                                                                                                                                                                                                                                                                                                        |                                                                   |           |         |    |    |    |       |        |                                         |          |
|-----|------|--------------------------------------------------------------------------------------------------------------------------------------------------------------------------------------------------------------------------------------------------------------------------------------------------------|-------------------------------------------------------------------|-----------|---------|----|----|----|-------|--------|-----------------------------------------|----------|
| ATP | 6006 | RecName gi 1221402<br>:<br>Full=Doli<br>chyl-<br>diphosph<br>ooligosac<br>charide--<br>protein<br>glycosyltr<br>ansferase<br>subunit<br>2;<br>AltName:<br>Full=Doli<br>chyl-<br>diphosph<br>ooligosac<br>charide--<br>protein<br>glycosyltr<br>ansferase<br>63 kDa<br>subunit;<br>AltName:<br>Full=Rib | gi 1221402<br>31.gi 14623<br>1756.gi 742<br>67729.gi 77<br>736155 | 69,197.20 | 100.00% | 12 | 17 | 23 | 0.24% | 30.90% | LQVTNV 5.68<br>LSQPLTQ<br>ATVK          | 1,840.05 |
| ATP | 6006 | RecName gi 1221402<br>:<br>Full=Doli<br>chyl-<br>diphosph<br>ooligosac<br>charide--<br>protein<br>glycosyltr<br>ansferase<br>subunit<br>2;<br>AltName:<br>Full=Doli<br>chyl-<br>diphosph<br>ooligosac<br>charide--<br>protein<br>glycosyltr<br>ansferase<br>63 kDa<br>subunit;<br>AltName:<br>Full=Rib | gi 1221402<br>31.gi 14623<br>1756.gi 742<br>67729.gi 77<br>736155 | 69,197.20 | 100.00% | 12 | 17 | 23 | 0.24% | 30.90% | LQVTNV 3.38<br>LSQPLTQ<br>ATVKLE<br>HAK | 2,418.37 |

|     |      |                                                                                                                                                                                                                                                                                                                    |           |         |    |    |    |       |        |                                             |      |          |
|-----|------|--------------------------------------------------------------------------------------------------------------------------------------------------------------------------------------------------------------------------------------------------------------------------------------------------------------------|-----------|---------|----|----|----|-------|--------|---------------------------------------------|------|----------|
| ATP | 6006 | RecName gi 1221402<br>:<br>Full=Doli<br>chyl-<br>diphosph<br>ooligosac<br>charide--<br>protein<br>glycosyltr<br>ansferase<br>subunit<br>2;<br>AltName:<br>Full=Doli<br>chyl-<br>diphosph<br>ooligosac<br>charide--<br>protein<br>glycosyltr<br>ansferase<br>63 kDa<br>subunit;<br>AltName:<br>Full=Rib<br>ophorin- | 69,197.20 | 100.00% | 12 | 17 | 23 | 0.24% | 30.90% | LSKEET<br>VLATVQ<br>ALQTAS<br>YLSQQA<br>DLR | 4.57 | 2,963.57 |
| ATP | 6006 | RecName gi 1221402<br>:<br>Full=Doli<br>chyl-<br>diphosph<br>ooligosac<br>charide--<br>protein<br>glycosyltr<br>ansferase<br>subunit<br>2;<br>AltName:<br>Full=Doli<br>chyl-<br>diphosph<br>ooligosac<br>charide--<br>protein<br>glycosyltr<br>ansferase<br>63 kDa<br>subunit;<br>AltName:<br>Full=Rib<br>ophorin- | 69,197.20 | 100.00% | 12 | 17 | 23 | 0.24% | 30.90% | NFESLSE<br>AFSVAS<br>AAAALS<br>ENR          | 3.27 | 2,271.09 |



|     |      |                                                                                                                                                                                                                                                                                                     |           |         |    |    |    |       |        |                        |      |          |
|-----|------|-----------------------------------------------------------------------------------------------------------------------------------------------------------------------------------------------------------------------------------------------------------------------------------------------------|-----------|---------|----|----|----|-------|--------|------------------------|------|----------|
| ATP | 6006 | RecName gi 1221402 :<br>Full=Doli<br>chyl-<br>diphosph<br>ooligosac<br>charide--<br>protein<br>glycosyltr<br>ansferase<br>subunit<br>2;<br>AltName:<br>Full=Doli<br>chyl-<br>diphosph<br>ooligosac<br>charide--<br>protein<br>glycosyltr<br>ansferase<br>63 kDa<br>subunit;<br>AltName:<br>Full=Rib | 69,197.20 | 100.00% | 12 | 17 | 23 | 0.24% | 30.90% | SIVEEIE<br>DLVAR       | 4.01 | 1,372.73 |
| ATP | 6006 | RecName gi 1221402 :<br>Full=Doli<br>chyl-<br>diphosph<br>ooligosac<br>charide--<br>protein<br>glycosyltr<br>ansferase<br>subunit<br>2;<br>AltName:<br>Full=Doli<br>chyl-<br>diphosph<br>ooligosac<br>charide--<br>protein<br>glycosyltr<br>ansferase<br>63 kDa<br>subunit;<br>AltName:<br>Full=Rib | 69,197.20 | 100.00% | 12 | 17 | 23 | 0.24% | 30.90% | TGQEVV<br>FVAEPD<br>SK | 3.07 | 1,505.75 |

|     |      |                                                                                                                                                                                                                                          |           |         |    |    |    |       |        |                                             |          |
|-----|------|------------------------------------------------------------------------------------------------------------------------------------------------------------------------------------------------------------------------------------------|-----------|---------|----|----|----|-------|--------|---------------------------------------------|----------|
| ATP | 6006 | RecName gi 1221402 : 31.gi 14623 Full=Doli chyl- diphosph oligosac charide-- protein glycosyltr ansferase subunit 2; AltName: Full=Doli chyl- diphosph oligosac charide-- protein glycosyltr ansferase 63 kDa subunit; AltName: Full=Rib | 69,197.20 | 100.00% | 12 | 17 | 23 | 0.24% | 30.90% | VEGDNR 3.92<br>YIANTV<br>ELR                | 1,748.89 |
| ATP | 6006 | RecName gi 1221402 : 31.gi 14623 Full=Doli chyl- diphosph oligosac charide-- protein glycosyltr ansferase subunit 2; AltName: Full=Doli chyl- diphosph oligosac charide-- protein glycosyltr ansferase 63 kDa subunit; AltName: Full=Rib | 69,197.20 | 100.00% | 12 | 17 | 23 | 0.24% | 30.90% | VKISTEV 3.62<br>GITNVD<br>LSTVDK<br>DQSIAPK | 2,757.49 |

|     |      |                                                                                                                                                                                                                                                                                                                    |            |         |    |    |    |       |        |                                     |      |          |
|-----|------|--------------------------------------------------------------------------------------------------------------------------------------------------------------------------------------------------------------------------------------------------------------------------------------------------------------------|------------|---------|----|----|----|-------|--------|-------------------------------------|------|----------|
| ATP | 6006 | RecName gi 1221402<br>:<br>Full=Doli<br>chyl-<br>diphosph<br>ooligosac<br>charide--<br>protein<br>glycosyltr<br>ansferase<br>subunit<br>2;<br>AltName:<br>Full=Doli<br>chyl-<br>diphosph<br>ooligosac<br>charide--<br>protein<br>glycosyltr<br>ansferase<br>63 kDa<br>subunit;<br>AltName:<br>Full=Rib<br>ophorin- | 69,197.20  | 100.00% | 12 | 17 | 23 | 0.24% | 30.90% | YIANTV<br>ELR                       | 2.87 | 1,078.59 |
| ATP | 6006 | PREDIC gi 1199131<br>TED:<br>integrin,<br>alpha 2<br>(CD49B,<br>alpha 2<br>subunit<br>of VLA-2<br>receptor)                                                                                                                                                                                                        | 148,911.70 | 99.80%  | 2  | 2  | 2  | 0.02% | 1.98%  | ALSESQE<br>ENMADN<br>SVNLK          | 2.32 | 1,994.90 |
| ATP | 6006 | PREDIC gi 1199131<br>TED:<br>integrin,<br>alpha 2<br>(CD49B,<br>alpha 2<br>subunit<br>of VLA-2<br>receptor)                                                                                                                                                                                                        | 148,911.70 | 99.80%  | 2  | 2  | 2  | 0.02% | 1.98%  | VVFNLN<br>TFK                       | 2.47 | 1,081.60 |
| ATP | 6006 | STT3B gi 1461866<br>protein<br>21,gi 14823<br>5371                                                                                                                                                                                                                                                                 | 93,202.50  | 100.00% | 3  | 3  | 4  | 0.04% | 4.99%  | ENPPVE<br>DSSDED<br>DKRNPG<br>NLYDK | 2.64 | 2,633.16 |
| ATP | 6006 | STT3B gi 1461866<br>protein<br>21,gi 14823<br>5371                                                                                                                                                                                                                                                                 | 93,202.50  | 100.00% | 3  | 3  | 4  | 0.04% | 4.99%  | HVTEQE<br>KTEEGL<br>GPNIK           | 4.17 | 1,908.97 |
| ATP | 6006 | STT3B gi 1461866<br>protein<br>21,gi 14823<br>5371                                                                                                                                                                                                                                                                 | 93,202.50  | 100.00% | 3  | 3  | 4  | 0.04% | 4.99%  | KHVTEQ<br>EKTEEG<br>LGPNIK          | 3.38 | 2,037.06 |
| ATP | 6006 | Synaptoja gi 7435405<br>nin 2<br>binding<br>protein<br>20                                                                                                                                                                                                                                                          | 15,792.00  | 99.80%  | 2  | 2  | 2  | 0.02% | 19.30% | LQEGDK<br>ILSVNGQ<br>DLK            | 3.46 | 1,756.94 |
| ATP | 6006 | Synaptoja gi 7435405<br>nin 2<br>binding<br>protein<br>20                                                                                                                                                                                                                                                          | 15,792.00  | 99.80%  | 2  | 2  | 2  | 0.02% | 19.30% | NLLHQD<br>AVDLFR                    | 3    | 1,440.76 |

|     |      |                          |                                        |            |         |    |    |    |       |        |                                                             |          |
|-----|------|--------------------------|----------------------------------------|------------|---------|----|----|----|-------|--------|-------------------------------------------------------------|----------|
| ATP | 6006 | ADPGK protein            | gi 126010731,gi 126722892,gi 205686178 | 54,066.80  | 99.80%  | 2  | 2  | 2  | 0.02% | 9.66%  | FFSDKET 3.23<br>FHDIQ<br>VASEFPE<br>AQHYVG<br>GNAALI<br>GQK | 3,851.87 |
| ATP | 6006 | ADPGK protein            | gi 126010731,gi 126722892,gi 205686178 | 54,066.80  | 99.80%  | 2  | 2  | 2  | 0.02% | 9.66%  | NDLEEA 2.28<br>FVHFMG<br>K                                  | 1,552.71 |
| ATP | 6006 | integrin alpha-V subunit | gi 11596385,gi 124056464               | 116,117.20 | 100.00% | 18 | 21 | 35 | 0.37% | 27.30% | AGTQLL 3.3<br>AGLR                                          | 999.5947 |
| ATP | 6006 | integrin alpha-V subunit | gi 11596385,gi 124056464               | 116,117.20 | 100.00% | 18 | 21 | 35 | 0.37% | 27.30% | AQNQGE 3.03<br>GAYEAE<br>LIVSIPLQ<br>ADFIGV<br>VR           | 2,987.55 |
| ATP | 6006 | integrin alpha-V subunit | gi 11596385,gi 124056464               | 116,117.20 | 100.00% | 18 | 21 | 35 | 0.37% | 27.30% | ASGDFQ 2.92<br>TIKLNGF<br>EVFAR                             | 2,000.02 |
| ATP | 6006 | integrin alpha-V subunit | gi 11596385,gi 124056464               | 116,117.20 | 100.00% | 18 | 21 | 35 | 0.37% | 27.30% | ENPETEE 2.98<br>DVGPVV<br>QHIELR                            | 2,353.13 |
| ATP | 6006 | integrin alpha-V subunit | gi 11596385,gi 124056464               | 116,117.20 | 100.00% | 18 | 21 | 35 | 0.37% | 27.30% | FDLQIQS 2.79<br>SNLFDK                                      | 1,554.78 |
| ATP | 6006 | integrin alpha-V subunit | gi 11596385,gi 124056464               | 116,117.20 | 100.00% | 18 | 21 | 35 | 0.37% | 27.30% | FGSAIAP 4.39<br>LGDLQ<br>DGFNDI<br>AIAAPY<br>GGEDKK         | 3,165.54 |
| ATP | 6006 | integrin alpha-V subunit | gi 11596385,gi 124056464               | 116,117.20 | 100.00% | 18 | 21 | 35 | 0.37% | 27.30% | FSVHQQ 4.45<br>SEMDTS<br>VK                                 | 1,638.74 |
| ATP | 6006 | integrin alpha-V subunit | gi 11596385,gi 124056464               | 116,117.20 | 100.00% | 18 | 21 | 35 | 0.37% | 27.30% | GALPTK 4.52<br>LDFQVE<br>LLDKL<br>K                         | 2,141.26 |
| ATP | 6006 | integrin alpha-V subunit | gi 11596385,gi 124056464               | 116,117.20 | 100.00% | 18 | 21 | 35 | 0.37% | 27.30% | GATDID 4.67<br>KNGYPD<br>LIVGAFG<br>VDR                     | 2,293.15 |
| ATP | 6006 | integrin alpha-V subunit | gi 11596385,gi 124056464               | 116,117.20 | 100.00% | 18 | 21 | 35 | 0.37% | 27.30% | GIVYIFN 4.48<br>GRPTGL<br>NAVPSQI<br>LEGK                   | 2,543.40 |
| ATP | 6006 | integrin alpha-V subunit | gi 11596385,gi 124056464               | 116,117.20 | 100.00% | 18 | 21 | 35 | 0.37% | 27.30% | IYIGDDN 3.32<br>PLTLIVK                                     | 1,573.88 |
| ATP | 6006 | integrin alpha-V subunit | gi 11596385,gi 124056464               | 116,117.20 | 100.00% | 18 | 21 | 35 | 0.37% | 27.30% | LNGFEV 2.67<br>FAR                                          | 1,052.55 |
| ATP | 6006 | integrin alpha-V subunit | gi 11596385,gi 124056464               | 116,117.20 | 100.00% | 18 | 21 | 35 | 0.37% | 27.30% | MFLLVG 3.55<br>APK                                          | 991.5647 |
| ATP | 6006 | integrin alpha-V subunit | gi 11596385,gi 124056464               | 116,117.20 | 100.00% | 18 | 21 | 35 | 0.37% | 27.30% | SSASFNV 3.21<br>IEFPYK                                      | 1,488.74 |
| ATP | 6006 | integrin alpha-V subunit | gi 11596385,gi 124056464               | 116,117.20 | 100.00% | 18 | 21 | 35 | 0.37% | 27.30% | TLGMVY 2.8<br>IYDGK                                         | 1,275.63 |
| ATP | 6006 | integrin alpha-V subunit | gi 11596385,gi 124056464               | 116,117.20 | 100.00% | 18 | 21 | 35 | 0.37% | 27.30% | VRPPQE 2.34<br>EQEREQ<br>LQPHEN<br>GEGNSE<br>T              | 2,917.33 |

|     |      |                                                                   |                                                                                                                                                |            |         |    |    |    |       |        |                                    |      |          |
|-----|------|-------------------------------------------------------------------|------------------------------------------------------------------------------------------------------------------------------------------------|------------|---------|----|----|----|-------|--------|------------------------------------|------|----------|
| ATP | 6006 | integrin<br>alpha-V<br>subunit                                    | gi 1159638<br>5,gi 124056<br>464                                                                                                               | 116,117.20 | 100.00% | 18 | 21 | 35 | 0.37% | 27.30% | VYSIKY<br>NNQLAT<br>R              | 3.59 | 1,569.84 |
| ATP | 6006 | integrin<br>alpha-V<br>subunit                                    | gi 1159638<br>5,gi 124056<br>464                                                                                                               | 116,117.20 | 100.00% | 18 | 21 | 35 | 0.37% | 27.30% | YKENPE<br>TEEDVG<br>PVVQHI<br>YELR | 4.11 | 2,644.29 |
| ATP | 6006 | PREDIC<br>TED:<br>similar to<br>60S<br>ribosomal<br>protein<br>L9 | gi 1199043<br>84,gi 11990<br>5715,gi 164<br>420694,gi 7<br>6607197,gi <br>91207745                                                             | 21,858.70  | 100.00% | 3  | 3  | 3  | 0.03% | 17.20% | FLDGIYV<br>SEK                     | 2.99 | 1,170.60 |
| ATP | 6006 | PREDIC<br>TED:<br>similar to<br>60S<br>ribosomal<br>protein<br>L9 | gi 1199043<br>84,gi 11990<br>5715,gi 164<br>420694,gi 7<br>6607197,gi <br>91207745                                                             | 21,858.70  | 100.00% | 3  | 3  | 3  | 0.03% | 17.20% | MKTILS<br>NQTVDIP<br>ENVDIN<br>LK  | 2.5  | 2,401.26 |
| ATP | 6006 | PREDIC<br>TED:<br>similar to<br>60S<br>ribosomal<br>protein<br>L9 | gi 1199043<br>84,gi 11990<br>5715,gi 164<br>420694,gi 7<br>6607197,gi <br>91207745                                                             | 21,858.70  | 100.00% | 3  | 3  | 3  | 0.03% | 17.20% | TILSNQT<br>VDIPENV<br>DINLKG<br>R  | 2.69 | 2,339.26 |
| ATP | 6006 | H(+)-<br>transporti<br>ng ATP<br>synthase                         | gi 102,gi 11<br>4402,gi 158<br>429020,gi 1<br>58429021,g<br>i 15842902<br>2,gi 158431<br>066,gi 1584<br>31067,gi 15<br>8431068,gi <br>27807237 | 55,248.00  | 100.00% | 9  | 9  | 10 | 0.11% | 22.50% | AVDSL<br>PIGR                      | 2.88 | 1,026.59 |
| ATP | 6006 | H(+)-<br>transporti<br>ng ATP<br>synthase                         | gi 102,gi 11<br>4402,gi 158<br>429020,gi 1<br>58429021,g<br>i 15842902<br>2,gi 158431<br>066,gi 1584<br>31067,gi 15<br>8431068,gi <br>27807237 | 55,248.00  | 100.00% | 9  | 9  | 10 | 0.11% | 22.50% | FENAFLS<br>HVISQH<br>QALLSK        | 3.12 | 2,169.15 |
| ATP | 6006 | H(+)-<br>transporti<br>ng ATP<br>synthase                         | gi 102,gi 11<br>4402,gi 158<br>429020,gi 1<br>58429021,g<br>i 15842902<br>2,gi 158431<br>066,gi 1584<br>31067,gi 15<br>8431068,gi <br>27807237 | 55,248.00  | 100.00% | 9  | 9  | 10 | 0.11% | 22.50% | ILGADTS<br>VDLEET<br>GR            | 3.44 | 1,575.79 |

|     |      |                                           |                                                                                                                                                |           |         |   |   |    |       |        |                                         |          |
|-----|------|-------------------------------------------|------------------------------------------------------------------------------------------------------------------------------------------------|-----------|---------|---|---|----|-------|--------|-----------------------------------------|----------|
| ATP | 6006 | H(+)-<br>transporti<br>ng ATP<br>synthase | gi 102,gi 11<br>4402,gi 158<br>429020,gi 1<br>58429021,g<br>i 15842902<br>2,gi 158431<br>066,gi 1584<br>31067,gi 15<br>8431068,gi <br>27807237 | 55,248.00 | 100.00% | 9 | 9 | 10 | 0.11% | 22.50% | ISVREPM 2.83<br>QTGIK                   | 1,374.74 |
| ATP | 6006 | H(+)-<br>transporti<br>ng ATP<br>synthase | gi 102,gi 11<br>4402,gi 158<br>429020,gi 1<br>58429021,g<br>i 15842902<br>2,gi 158431<br>066,gi 1584<br>31067,gi 15<br>8431068,gi <br>27807237 | 55,248.00 | 100.00% | 9 | 9 | 10 | 0.11% | 22.50% | ITKFENA 4.35<br>FLSHVIS<br>QHQALL<br>SK | 2,511.37 |
| ATP | 6006 | H(+)-<br>transporti<br>ng ATP<br>synthase | gi 102,gi 11<br>4402,gi 158<br>429020,gi 1<br>58429021,g<br>i 15842902<br>2,gi 158431<br>066,gi 1584<br>31067,gi 15<br>8431068,gi <br>27807237 | 55,248.00 | 100.00% | 9 | 9 | 10 | 0.11% | 22.50% | TGAIVD 3.91<br>VPVGEE<br>LLGR           | 1,624.89 |
| ATP | 6006 | H(+)-<br>transporti<br>ng ATP<br>synthase | gi 102,gi 11<br>4402,gi 158<br>429020,gi 1<br>58429021,g<br>i 15842902<br>2,gi 158431<br>066,gi 1584<br>31067,gi 15<br>8431068,gi <br>27807237 | 55,248.00 | 100.00% | 9 | 9 | 10 | 0.11% | 22.50% | TSIAIDTI 2.68<br>INQK                   | 1,316.74 |
| ATP | 6006 | H(+)-<br>transporti<br>ng ATP<br>synthase | gi 102,gi 11<br>4402,gi 158<br>429020,gi 1<br>58429021,g<br>i 15842902<br>2,gi 158431<br>066,gi 1584<br>31067,gi 15<br>8431068,gi <br>27807237 | 55,248.00 | 100.00% | 9 | 9 | 10 | 0.11% | 22.50% | VLSIGDG 2.52<br>IAR                     | 1,000.58 |
| ATP | 6006 | H(+)-<br>transporti<br>ng ATP<br>synthase | gi 102,gi 11<br>4402,gi 158<br>429020,gi 1<br>58429021,g<br>i 15842902<br>2,gi 158431<br>066,gi 1584<br>31067,gi 15<br>8431068,gi <br>27807237 | 55,248.00 | 100.00% | 9 | 9 | 10 | 0.11% | 22.50% | VVDALG 4.88<br>NAIDGK<br>GPIGSK         | 1,710.94 |

|     |      |                                              |                                                   |           |         |   |   |    |       |        |                                                    |          |
|-----|------|----------------------------------------------|---------------------------------------------------|-----------|---------|---|---|----|-------|--------|----------------------------------------------------|----------|
| ATP | 6006 | SEC22 vesicle traffickin g protein homolog B | gi 115496488,gi 74354583                          | 28,710.00 | 100.00% | 7 | 9 | 10 | 0.11% | 41.80% | IMVANIE 3.69<br>EVLQR                              | 1,430.77 |
| ATP | 6006 | SEC22 vesicle traffickin g protein homolog B | gi 115496488,gi 74354583                          | 28,710.00 | 100.00% | 7 | 9 | 10 | 0.11% | 41.80% | IMVANIE 2.32<br>EVLQRG<br>EALSAL<br>DSK            | 2,402.26 |
| ATP | 6006 | SEC22 vesicle traffickin g protein homolog B | gi 115496488,gi 74354583                          | 28,710.00 | 100.00% | 7 | 9 | 10 | 0.11% | 41.80% | KLAFAY 3.38<br>LEDLHS<br>EFDEQH<br>GK              | 2,377.15 |
| ATP | 6006 | SEC22 vesicle traffickin g protein homolog B | gi 115496488,gi 74354583                          | 28,710.00 | 100.00% | 7 | 9 | 10 | 0.11% | 41.80% | KVPTVS 3.01<br>RPYSFIE<br>FDTYIQK                  | 2,418.27 |
| ATP | 6006 | SEC22 vesicle traffickin g protein homolog B | gi 115496488,gi 74354583                          | 28,710.00 | 100.00% | 7 | 9 | 10 | 0.11% | 41.80% | NLGSINT 4.19<br>ELQDVQ<br>R                        | 1,586.81 |
| ATP | 6006 | SEC22 vesicle traffickin g protein homolog B | gi 115496488,gi 74354583                          | 28,710.00 | 100.00% | 7 | 9 | 10 | 0.11% | 41.80% | VADGLP 3.39<br>LAASMQ<br>EDEQSG<br>R               | 1,989.92 |
| ATP | 6006 | SEC22 vesicle traffickin g protein homolog B | gi 115496488,gi 74354583                          | 28,710.00 | 100.00% | 7 | 9 | 10 | 0.11% | 41.80% | VADGLP 5.48<br>LAASMQ<br>EDEQSG<br>RDLQQY<br>QSQAK | 3,179.49 |
| ATP | 6006 | GTP-binding protein (smg p21B)               | gi 163722,gi 28461271,gi 4711772,gi 2,gi 74354581 | 20,806.90 | 100.00% | 4 | 6 | 8  | 0.08% | 19.60% | INVNEIF 3.32<br>YDLVR                              | 1,494.80 |
| ATP | 6006 | GTP-binding protein (smg p21B)               | gi 163722,gi 28461271,gi 4711772,gi 2,gi 74354581 | 20,806.90 | 100.00% | 4 | 6 | 8  | 0.08% | 19.60% | LVVLGS 2.84<br>GGVGK                               | 985.6042 |
| ATP | 6006 | GTP-binding protein (smg p21B)               | gi 163722,gi 28461271,gi 4711772,gi 2,gi 74354581 | 20,806.90 | 100.00% | 4 | 6 | 8  | 0.08% | 19.60% | SKINVNE 3.95<br>IFYDLVR                            | 1,709.92 |
| ATP | 6006 | GTP-binding protein (smg p21B)               | gi 163722,gi 28461271,gi 4711772,gi 2,gi 74354581 | 20,806.90 | 100.00% | 4 | 6 | 8  | 0.08% | 19.60% | YDPTIED 2.55<br>SYRK                               | 1,386.65 |
| ATP | 6006 | metadherin                                   | gi 114051299,gi 89994114                          | 64,037.90 | 99.80%  | 2 | 2 | 2  | 0.02% | 5.83%  | KREEAA 3.01<br>AAAPAP<br>AADDQG<br>VLK             | 2,079.08 |
| ATP | 6006 | metadherin                                   | gi 114051299,gi 89994114                          | 64,037.90 | 99.80%  | 2 | 2 | 2  | 0.02% | 5.83%  | TISTSDP 2.66<br>ADALIK                             | 1,331.71 |

|     |      |                                                                              |                       |        |   |   |   |       |        |                                          |          |
|-----|------|------------------------------------------------------------------------------|-----------------------|--------|---|---|---|-------|--------|------------------------------------------|----------|
| ATP | 6006 | RecName : Full=ATP synthase subunit g, mitochondrial; Short=ATPase subunit g | gi 2493093, 11,604.00 | 99.80% | 2 | 4 | 6 | 0.06% | 19.20% | APALVN 3.8<br>AAVTYS<br>KPR              | 1,557.87 |
| ATP | 6006 | RecName : Full=ATP synthase subunit g, mitochondrial; Short=ATPase subunit g | gi 2493093, 11,604.00 | 99.80% | 2 | 4 | 6 | 0.06% | 19.20% | NLAEKA 6.46<br>PALVNA<br>AVTYSK<br>PR    | 2,113.18 |
| ATP | 6006 | RecName : Full=ATP synthase subunit g, mitochondrial; Short=ATPase subunit g | gi 1585085, 42,125.60 | 99.90% | 2 | 2 | 3 | 0.03% | 15.30% | LLLLGT 3.43<br>GESGK                     | 1,087.64 |
| ATP | 6006 | RecName : Full=ATP synthase subunit g, mitochondrial; Short=ATPase subunit g | gi 1585085, 42,125.60 | 99.90% | 2 | 2 | 3 | 0.03% | 15.30% | VRVPTT 5.37<br>GIIEYPF<br>DLQSVIF<br>R   | 2,450.34 |
| ATP | 6006 | RecName : Full=ATP synthase subunit g, mitochondrial; Short=ATPase subunit g | gi 1585085, 42,125.60 | 99.90% | 2 | 2 | 3 | 0.03% | 15.30% | YYLNDL 3.27<br>DRVADP<br>AYLPTQ<br>QDVLR | 2,738.38 |
| ATP | 6006 | PREDICTED: similar to CDW92 antigen isoform 1                                | gi 1199009, 72,875.80 | 99.80% | 2 | 2 | 2 | 0.02% | 4.73%  | LPVPAS 3.68<br>APIPFH<br>R               | 1,548.87 |
| ATP | 6006 | PREDICTED: similar to CDW92 antigen isoform 1                                | gi 1199009, 72,875.80 | 99.80% | 2 | 2 | 2 | 0.02% | 4.73%  | NAELEAI 2.9<br>PNSGMD<br>HTHR            | 1,907.87 |



|     |      |                                                                                                                                                                                                                                                                                  |                           |           |        |   |   |   |       |        |                                      |      |          |
|-----|------|----------------------------------------------------------------------------------------------------------------------------------------------------------------------------------------------------------------------------------------------------------------------------------|---------------------------|-----------|--------|---|---|---|-------|--------|--------------------------------------|------|----------|
| ATP | 6006 | PREDIC TED:<br>similar to<br>CAAX<br>prenyl<br>protease<br>1<br>homolog<br>(Prenyl<br>protein-<br>specific<br>endoprot<br>ease 1)<br>(Farnesyl<br>ated<br>proteins-<br>convertin<br>g enzyme<br>1) (FACE-<br>1) (Zinc<br>metallopr<br>oteinase<br>Ste24<br>homolog)<br>isoform 1 | gi 7661415<br>3           | 54,663.70 | 99.80% | 2 | 2 | 3 | 0.03% | 9.26%  | DIQEESG<br>MEPRND<br>GEGDSE<br>EIKAK | 3.56 | 2,679.17 |
| ATP | 6006 | PREDIC TED:<br>similar to<br>CAAX<br>prenyl<br>protease<br>1<br>homolog<br>(Prenyl<br>protein-<br>specific<br>endoprot<br>ease 1)<br>(Farnesyl<br>ated<br>proteins-<br>convertin<br>g enzyme<br>1) (FACE-<br>1) (Zinc<br>metallopr<br>oteinase<br>Ste24<br>homolog)<br>isoform 1 | gi 7661415<br>3           | 54,663.70 | 99.80% | 2 | 2 | 3 | 0.03% | 9.26%  | TTTHVP<br>LELGQI<br>MDSETF<br>EK     | 5.48 | 2,292.11 |
| ATP | 6006 | RecName<br>:<br>Full=60S<br>ribosomal<br>protein<br>L7a                                                                                                                                                                                                                          | gi 1088609<br>39,gi 14623 | 30,008.40 | 99.80% | 2 | 2 | 3 | 0.03% | 10.20% | LKVPPAI<br>NQFTQA<br>LDR             | 4.79 | 1,811.02 |
| ATP | 6006 | RecName<br>:<br>Full=60S<br>ribosomal<br>protein<br>L7a                                                                                                                                                                                                                          | gi 1088609<br>39,gi 14623 | 30,008.40 | 99.80% | 2 | 2 | 3 | 0.03% | 10.20% | NFGIGQ<br>DIQPK                      | 2.51 | 1,216.63 |

|     |      |                                                                                                                                                                                             |                                                  |           |         |   |   |   |       |        |                                            |      |          |
|-----|------|---------------------------------------------------------------------------------------------------------------------------------------------------------------------------------------------|--------------------------------------------------|-----------|---------|---|---|---|-------|--------|--------------------------------------------|------|----------|
| ATP | 6006 | RecName<br>:<br>Full=Euk<br>aryotic<br>initiation<br>factor 4A-<br>I;<br>Short=el<br>F-4A-I;<br>Short=el<br>F4A-I;<br>AltName:<br>Full=AT<br>P-<br>dependen<br>t RNA<br>helicase<br>eIF4A-1 | gi 1098924<br>71.gi 74268<br>155.gi 7773<br>5407 | 46,137.30 | 100.00% | 3 | 3 | 3 | 0.03% | 9.11%  | GFKDQI<br>YDIFQK                           | 2.87 | 1,501.77 |
| ATP | 6006 | RecName<br>:<br>Full=Euk<br>aryotic<br>initiation<br>factor 4A-<br>I;<br>Short=el<br>F-4A-I;<br>Short=el<br>F4A-I;<br>AltName:<br>Full=AT<br>P-<br>dependen<br>t RNA<br>helicase<br>eIF4A-1 | gi 1098924<br>71.gi 74268<br>155.gi 7773<br>5407 | 46,137.30 | 100.00% | 3 | 3 | 3 | 0.03% | 9.11%  | LQMEAP<br>HIIVGTP<br>GR                    | 2.64 | 1,634.87 |
| ATP | 6006 | RecName<br>:<br>Full=Euk<br>aryotic<br>initiation<br>factor 4A-<br>I;<br>Short=el<br>F-4A-I;<br>Short=el<br>F4A-I;<br>AltName:<br>Full=AT<br>P-<br>dependen<br>t RNA<br>helicase<br>eIF4A-1 | gi 1098924<br>71.gi 74268<br>155.gi 7773<br>5407 | 46,137.30 | 100.00% | 3 | 3 | 3 | 0.03% | 9.11%  | VLITDDL<br>LAR                             | 2.93 | 1,114.68 |
| ATP | 6006 | TMPO<br>protein                                                                                                                                                                             | gi 1461868<br>41.gi 14790<br>2328                | 42,927.20 | 100.00% | 5 | 6 | 7 | 0.07% | 23.80% | DVYVQL<br>YLQHLT<br>AR                     | 3.25 | 1,718.92 |
| ATP | 6006 | TMPO<br>protein                                                                                                                                                                             | gi 1461868<br>41.gi 14790<br>2328                | 42,927.20 | 100.00% | 5 | 6 | 7 | 0.07% | 23.80% | GPPDFSS<br>DEEREP<br>TPVLGS<br>GAAVAG<br>R | 5.12 | 2,598.24 |
| ATP | 6006 | TMPO<br>protein                                                                                                                                                                             | gi 1461868<br>41.gi 14790<br>2328                | 42,927.20 | 100.00% | 5 | 6 | 7 | 0.07% | 23.80% | HAAPILP<br>ITEFSDIP<br>R                   | 3.49 | 1,776.96 |

|     |      |                                |                                                    |            |         |   |   |   |       |        |                                   |      |          |
|-----|------|--------------------------------|----------------------------------------------------|------------|---------|---|---|---|-------|--------|-----------------------------------|------|----------|
| ATP | 6006 | TMPO<br>protein                | gi 1461868<br>41.gi 14790<br>2328                  | 42,927.20  | 100.00% | 5 | 6 | 7 | 0.07% | 23.80% | LKSELV<br>ANNVTL<br>PAGEQR<br>K   | 3.95 | 2,067.16 |
| ATP | 6006 | TMPO<br>protein                | gi 1461868<br>41.gi 14790<br>2328                  | 42,927.20  | 100.00% | 5 | 6 | 7 | 0.07% | 23.80% | SSTPLPT<br>ISSSVEN<br>TR          | 2.5  | 1,675.85 |
| ATP | 6006 | PREDIC<br>TED:<br>talin 1      | gi 1199005<br>17                                   | 269,759.80 | 100.00% | 8 | 8 | 8 | 0.08% | 5.47%  | GVGAAA<br>TAVTQA<br>LNELLQ<br>HVR | 4.2  | 2,119.16 |
| ATP | 6006 | PREDIC<br>TED:<br>talin 1      | gi 1199005<br>17                                   | 269,759.80 | 100.00% | 8 | 8 | 8 | 0.08% | 5.47%  | LAQAAQ<br>SSVATIT<br>R            | 4.19 | 1,416.78 |
| ATP | 6006 | PREDIC<br>TED:<br>talin 1      | gi 1199005<br>17                                   | 269,759.80 | 100.00% | 8 | 8 | 8 | 0.08% | 5.47%  | LLAALL<br>EDEGGS<br>GRPLLQ<br>AAK | 2.95 | 2,122.19 |
| ATP | 6006 | PREDIC<br>TED:<br>talin 1      | gi 1199005<br>17                                   | 269,759.80 | 100.00% | 8 | 8 | 8 | 0.08% | 5.47%  | LNEAAA<br>GLNQAA<br>TELVQA<br>SR  | 3.4  | 2,027.05 |
| ATP | 6006 | PREDIC<br>TED:<br>talin 1      | gi 1199005<br>17                                   | 269,759.80 | 100.00% | 8 | 8 | 8 | 0.08% | 5.47%  | MTKGIT<br>MATAKA<br>VAAGNS<br>CR  | 2.53 | 1,982.00 |
| ATP | 6006 | PREDIC<br>TED:<br>talin 1      | gi 1199005<br>17                                   | 269,759.80 | 100.00% | 8 | 8 | 8 | 0.08% | 5.47%  | TLSHPQ<br>QMALLD<br>QTK           | 3.2  | 1,726.88 |
| ATP | 6006 | PREDIC<br>TED:<br>talin 1      | gi 1199005<br>17                                   | 269,759.80 | 100.00% | 8 | 8 | 8 | 0.08% | 5.47%  | TMLESA<br>GGLIQT<br>AR            | 2.93 | 1,463.75 |
| ATP | 6006 | PREDIC<br>TED:<br>talin 1      | gi 1199005<br>17                                   | 269,759.80 | 100.00% | 8 | 8 | 8 | 0.08% | 5.47%  | VLGEAM<br>TGISQNA<br>K            | 3.09 | 1,434.73 |
| ATP | 6006 | SLC25A<br>12<br>protein        | gi 1515561<br>33.gi 15537<br>2111                  | 74,513.90  | 100.00% | 5 | 5 | 6 | 0.06% | 11.30% | FKPPSVA<br>VVQPK                  | 2.95 | 1,296.77 |
| ATP | 6006 | SLC25A<br>12<br>protein        | gi 1515561<br>33.gi 15537<br>2111                  | 74,513.90  | 100.00% | 5 | 5 | 6 | 0.06% | 11.30% | GLIPQLI<br>GVAPEK                 | 2.2  | 1,334.80 |
| ATP | 6006 | SLC25A<br>12<br>protein        | gi 1515561<br>33.gi 15537<br>2111                  | 74,513.90  | 100.00% | 5 | 5 | 6 | 0.06% | 11.30% | HLNYTE<br>FTQFLQE<br>LQLEHA<br>R  | 3.36 | 2,517.25 |
| ATP | 6006 | SLC25A<br>12<br>protein        | gi 1515561<br>33.gi 15537<br>2111                  | 74,513.90  | 100.00% | 5 | 5 | 6 | 0.06% | 11.30% | IAPLAEG<br>ALPYNL<br>AELQR        | 4.71 | 1,939.06 |
| ATP | 6006 | SLC25A<br>12<br>protein        | gi 1515561<br>33.gi 15537<br>2111                  | 74,513.90  | 100.00% | 5 | 5 | 6 | 0.06% | 11.30% | YLGLYN<br>DPNSNP<br>K             | 3.83 | 1,494.72 |
| ATP | 6006 | IKK<br>interactin<br>g protein | gi 1260106<br>33.gi 12616<br>5284.gi 193<br>806036 | 39,199.60  | 99.80%  | 2 | 2 | 2 | 0.02% | 6.88%  | METSEF<br>QGLQSK                  | 3.62 | 1,400.64 |
| ATP | 6006 | IKK<br>interactin<br>g protein | gi 1260106<br>33.gi 12616<br>5284.gi 193<br>806036 | 39,199.60  | 99.80%  | 2 | 2 | 2 | 0.02% | 6.88%  | NIGDLLS<br>SSIDR                  | 3.72 | 1,289.67 |
| ATP | 6006 | ALDH3A<br>2 protein            | gi 1515570<br>95.gi 15612<br>0617                  | 54,059.30  | 99.80%  | 2 | 2 | 2 | 0.02% | 4.95%  | IAFGGE<br>MDEATR                  | 2.95 | 1,312.58 |
| ATP | 6006 | ALDH3A<br>2 protein            | gi 1515570<br>95.gi 15612<br>0617                  | 54,059.30  | 99.80%  | 2 | 2 | 2 | 0.02% | 4.95%  | NADEAI<br>QFINER                  | 2.3  | 1,419.69 |

|     |      |                                                                                           |                                                                                 |           |         |   |   |   |       |        |                                                                |          |
|-----|------|-------------------------------------------------------------------------------------------|---------------------------------------------------------------------------------|-----------|---------|---|---|---|-------|--------|----------------------------------------------------------------|----------|
| ATP | 6006 | defender<br>against<br>cell death<br>1                                                    | gi 5985836<br>1,gi 739189<br>63,gi 74354<br>770,gi 7773<br>6467,gi 832<br>86811 | 12,477.50 | 99.80%  | 2 | 3 | 4 | 0.04% | 19.50% | ADFQGIS 3.01<br>PER                                            | 1,119.54 |
| ATP | 6006 | defender<br>against<br>cell death<br>1                                                    | gi 5985836<br>1,gi 739189<br>63,gi 74354<br>770,gi 7773<br>6467,gi 832<br>86811 | 12,477.50 | 99.80%  | 2 | 3 | 4 | 0.04% | 19.50% | FLEEYLS 2.41<br>ATPQR                                          | 1,453.73 |
| ATP | 6006 | PREDIC<br>TED:<br>heterogen<br>eous<br>nuclear<br>ribonucle<br>oprotein<br>M<br>isoform 2 | gi 1198948<br>63                                                                | 77,466.20 | 100.00% | 5 | 5 | 5 | 0.05% | 13.40% | AFITNIPF 2.77<br>DVK                                           | 1,264.69 |
| ATP | 6006 | PREDIC<br>TED:<br>heterogen<br>eous<br>nuclear<br>ribonucle<br>oprotein<br>M<br>isoform 2 | gi 1198948<br>63                                                                | 77,466.20 | 100.00% | 5 | 5 | 5 | 0.05% | 13.40% | GDFFPPE 4.46<br>RPQQLP<br>HGLGGI<br>GMGLGP<br>GGQPID<br>ANHNLK | 3,834.91 |
| ATP | 6006 | PREDIC<br>TED:<br>heterogen<br>eous<br>nuclear<br>ribonucle<br>oprotein<br>M<br>isoform 2 | gi 1198948<br>63                                                                | 77,466.20 | 100.00% | 5 | 5 | 5 | 0.05% | 13.40% | GGNRFE 4.37<br>PYANPT<br>KR                                    | 1,606.81 |
| ATP | 6006 | PREDIC<br>TED:<br>heterogen<br>eous<br>nuclear<br>ribonucle<br>oprotein<br>M<br>isoform 2 | gi 1198948<br>63                                                                | 77,466.20 | 100.00% | 5 | 5 | 5 | 0.05% | 13.40% | GNFGGS 4.36<br>FAGSFG<br>GAGGHA<br>PGVAR                       | 2,034.95 |
| ATP | 6006 | PREDIC<br>TED:<br>heterogen<br>eous<br>nuclear<br>ribonucle<br>oprotein<br>M<br>isoform 2 | gi 1198948<br>63                                                                | 77,466.20 | 100.00% | 5 | 5 | 5 | 0.05% | 13.40% | LKEVFS 3.87<br>MAGVV<br>VR                                     | 1,450.81 |
| ATP | 6006 | Prostagla<br>ndin I2<br>(prostacy<br>clin)<br>synthase<br>23                              | gi 1123623<br>85,gi 24933<br>72,gi 27806<br>107,gi 5385                         | 56,613.60 | 100.00% | 5 | 7 | 8 | 0.08% | 15.20% | ELQALT 2.55<br>DAMYTN<br>LR                                    | 1,654.81 |
| ATP | 6006 | Prostagla<br>ndin I2<br>(prostacy<br>clin)<br>synthase<br>23                              | gi 1123623<br>85,gi 24933<br>72,gi 27806<br>107,gi 5385                         | 56,613.60 | 100.00% | 5 | 7 | 8 | 0.08% | 15.20% | EVVADL 2.74<br>ALPMAD<br>GREFSLR                               | 2,105.07 |

|     |      |                                                        |                                                                 |           |         |   |   |   |       |        |                                                                 |      |          |
|-----|------|--------------------------------------------------------|-----------------------------------------------------------------|-----------|---------|---|---|---|-------|--------|-----------------------------------------------------------------|------|----------|
| ATP | 6006 | Prostagla<br>ndin I2<br>(prostacy<br>clin)<br>synthase | gi 1123623<br>85,gi 24933<br>72,gi 27806<br>107,gi 5385<br>23   | 56,613.60 | 100.00% | 5 | 7 | 8 | 0.08% | 15.20% | LLLFPFL<br>SPQKDP<br>EIYTDPE<br>VFK                             | 3.64 | 2,736.45 |
| ATP | 6006 | Prostagla<br>ndin I2<br>(prostacy<br>clin)<br>synthase | gi 1123623<br>85,gi 24933<br>72,gi 27806<br>107,gi 5385<br>23   | 56,613.60 | 100.00% | 5 | 7 | 8 | 0.08% | 15.20% | LLLFPFL<br>SPQKDP<br>EIYTDPE<br>VFKYNR                          | 4.07 | 3,169.66 |
| ATP | 6006 | Prostagla<br>ndin I2<br>(prostacy<br>clin)<br>synthase | gi 1123623<br>85,gi 24933<br>72,gi 27806<br>107,gi 5385<br>23   | 56,613.60 | 100.00% | 5 | 7 | 8 | 0.08% | 15.20% | VLDSMP<br>VLDSVL<br>SESLR                                       | 3.88 | 1,875.97 |
| ATP | 6006 | metallopr<br>oteinase                                  | gi 1044811,<br>gi 1577429<br>33,gi 27806<br>209,gi 2983<br>9751 | 84,171.20 | 100.00% | 4 | 5 | 5 | 0.05% | 7.35%  | AIDTIYQ<br>TTDFSGI<br>R                                         | 3.42 | 1,700.85 |
| ATP | 6006 | metallopr<br>oteinase                                  | gi 1044811,<br>gi 1577429<br>33,gi 27806<br>209,gi 2983<br>9751 | 84,171.20 | 100.00% | 4 | 5 | 5 | 0.05% | 7.35%  | EAVIAQI<br>SSHVK                                                | 2.33 | 1,281.72 |
| ATP | 6006 | metallopr<br>oteinase                                  | gi 1044811,<br>gi 1577429<br>33,gi 27806<br>209,gi 2983<br>9751 | 84,171.20 | 100.00% | 4 | 5 | 5 | 0.05% | 7.35%  | HYEGLS<br>YDVDSL<br>HQQ                                         | 4.9  | 1,790.83 |
| ATP | 6006 | metallopr<br>oteinase                                  | gi 1044811,<br>gi 1577429<br>33,gi 27806<br>209,gi 2983<br>9751 | 84,171.20 | 100.00% | 4 | 5 | 5 | 0.05% | 7.35%  | LPPPKPL<br>PGTLKR                                               | 1.74 | 1,413.89 |
| ATP | 6006 | tubulin,<br>beta                                       | gi 1140527<br>31,gi 14623<br>1774,gi 868<br>23832               | 49,652.60 | 100.00% | 3 | 3 | 4 | 0.04% | 32.70% | AILVDLE<br>PGTMDS<br>VR                                         | 3.25 | 1,631.83 |
| ATP | 6006 | tubulin,<br>beta                                       | gi 1140527<br>31,gi 14623<br>1774,gi 868<br>23832               | 49,652.60 | 100.00% | 3 | 3 | 4 | 0.04% | 32.70% | ALTVPE<br>LTQQVF<br>DAK                                         | 3.55 | 1,659.90 |
| ATP | 6006 | tubulin,<br>beta                                       | gi 1140527<br>31,gi 14623<br>1774,gi 868<br>23832               | 49,652.60 | 100.00% | 3 | 3 | 4 | 0.04% | 32.70% | GHYTEG<br>AELVDS<br>VLDVVR<br>K                                 | 3.22 | 2,087.08 |
| ATP | 6006 | tubulin,<br>beta                                       | gi 1140527<br>31,gi 14623<br>1774,gi 868<br>23832               | 49,652.60 | 100.00% | 3 | 3 | 4 | 0.04% | 32.70% | IMNTFSV<br>VPSPK                                                | 3    | 1,335.70 |
| ATP | 6006 | tubulin,<br>beta                                       | gi 1140527<br>31,gi 14623<br>1774,gi 868<br>23832               | 49,652.60 | 100.00% | 3 | 3 | 4 | 0.04% | 32.70% | ISVYYNE<br>ATGGK                                                | 3.28 | 1,301.64 |
| ATP | 6006 | tubulin,<br>beta                                       | gi 1140527<br>31,gi 14623<br>1774,gi 868<br>23832               | 49,652.60 | 100.00% | 3 | 3 | 4 | 0.04% | 32.70% | LAVNMV<br>PFPR                                                  | 3.84 | 1,159.63 |
| ATP | 6006 | tubulin,<br>beta                                       | gi 1140527<br>31,gi 14623<br>1774,gi 868<br>23832               | 49,652.60 | 100.00% | 3 | 3 | 4 | 0.04% | 32.70% | LHFFMP<br>GFAPLTS<br>R                                          | 3.49 | 1,636.83 |
| ATP | 6006 | tubulin,<br>beta                                       | gi 1140527<br>31,gi 14623<br>1774,gi 868<br>23832               | 49,652.60 | 100.00% | 3 | 3 | 4 | 0.04% | 32.70% | VSDTVV<br>EPYNAT<br>LSVHQL<br>VENTDE<br>TYCIDNE<br>ALYDICF<br>R | 3.15 | 4,479.06 |

|     |      |                                                         |                                                                         |            |         |    |    |     |       |        |                                  |          |
|-----|------|---------------------------------------------------------|-------------------------------------------------------------------------|------------|---------|----|----|-----|-------|--------|----------------------------------|----------|
| ATP | 6006 | tubulin, beta                                           | gi 114052731,gi 146231774,gi 86823832                                   | 49,652.60  | 100.00% | 3  | 3  | 4   | 0.04% | 32.70% | YLTVAA 2.35<br>VFR               | 1,039.59 |
| ATP | 6006 | melanoma cell adhesion molecule                         | gi 2323281                                                              | 9,468.30   | 99.80%  | 2  | 3  | 5   | 0.05% | 38.40% | APGDQG 2.69<br>EKYIDLR<br>H      | 1,598.79 |
| ATP | 6006 | melanoma cell adhesion molecule                         | gi 2323281                                                              | 9,468.30   | 99.80%  | 2  | 3  | 5   | 0.05% | 38.40% | SDKLPEE 4.9<br>MGLLQG<br>SSGDKR  | 2,063.01 |
| ATP | 6006 | Hemoglobin, gamma 2                                     | gi 158455008,gi 160333301,gi 3934                                       | 15,841.20  | 100.00% | 5  | 6  | 369 | 3.88% | 47.60% | AAVTSL 2.47<br>FAK               | 907.5247 |
| ATP | 6006 | Hemoglobin, gamma 2                                     | gi 158455008,gi 160333301,gi 3934                                       | 15,841.20  | 100.00% | 5  | 6  | 369 | 3.88% | 47.60% | FFESFGD 3.97<br>LSSADAI<br>LGNPK | 2,014.98 |
| ATP | 6006 | Hemoglobin, gamma 2                                     | gi 158455008,gi 160333301,gi 3934                                       | 15,841.20  | 100.00% | 5  | 6  | 369 | 3.88% | 47.60% | LLGNVL 4.93<br>VVVLAR            | 1,265.83 |
| ATP | 6006 | Hemoglobin, gamma 2                                     | gi 158455008,gi 160333301,gi 3934                                       | 15,841.20  | 100.00% | 5  | 6  | 369 | 3.88% | 47.60% | RFGSEFS 2.74<br>PELQASF<br>QK    | 1,857.91 |
| ATP | 6006 | Hemoglobin, gamma 2                                     | gi 158455008,gi 160333301,gi 3934                                       | 15,841.20  | 100.00% | 5  | 6  | 369 | 3.88% | 47.60% | VKVDEV 4.16<br>GGEALG<br>R       | 1,328.72 |
| ATP | 6006 | Ribosomal protein L6                                    | gi 126717393,gi 58760432,gi 6153343,gi 61533350,gi 67461090,gi 72534798 | 32,672.90  | 99.80%  | 2  | 2  | 2   | 0.02% | 10.50% | AVPQLQ 2.17<br>GYLR              | 1,144.65 |
| ATP | 6006 | Ribosomal protein L6                                    | gi 126717393,gi 58760432,gi 6153343,gi 61533350,gi 67461090,gi 72534798 | 32,672.90  | 99.80%  | 2  | 2  | 2   | 0.02% | 10.50% | HQGEIF 3.13<br>DTEREK<br>YEITEQR | 2,537.19 |
| ATP | 6006 | PREDICTED: filamin A, alpha (actin binding protein 280) | gi 194680254                                                            | 276,424.10 | 100.00% | 12 | 12 | 12  | 0.13% | 7.95%  | AFGPGL 4.36<br>QGSAG<br>SPAR     | 1,429.72 |
| ATP | 6006 | PREDICTED: filamin A, alpha (actin binding protein 280) | gi 194680254                                                            | 276,424.10 | 100.00% | 12 | 12 | 12  | 0.13% | 7.95%  | ANLPQS 2.86<br>FQVDTS<br>K       | 1,434.72 |

|     |      |                                                                               |                  |            |         |    |    |    |       |       |                                     |      |          |
|-----|------|-------------------------------------------------------------------------------|------------------|------------|---------|----|----|----|-------|-------|-------------------------------------|------|----------|
| ATP | 6006 | PREDIC<br>TED:<br>filamin<br>A, alpha<br>(actin<br>binding<br>protein<br>280) | gi 1946802<br>54 | 276,424.10 | 100.00% | 12 | 12 | 12 | 0.13% | 7.95% | AYGPGIE<br>PTGNMV<br>K              | 3.06 | 1,449.70 |
| ATP | 6006 | PREDIC<br>TED:<br>filamin<br>A, alpha<br>(actin<br>binding<br>protein<br>280) | gi 1946802<br>54 | 276,424.10 | 100.00% | 12 | 12 | 12 | 0.13% | 7.95% | FNEEHIP<br>DSPFVV<br>PVASPS<br>GDAR | 3.05 | 2,467.19 |
| ATP | 6006 | PREDIC<br>TED:<br>filamin<br>A, alpha<br>(actin<br>binding<br>protein<br>280) | gi 1946802<br>54 | 276,424.10 | 100.00% | 12 | 12 | 12 | 0.13% | 7.95% | GAGTGG<br>LGLAVE<br>GPSEAK          | 3.78 | 1,570.81 |
| ATP | 6006 | PREDIC<br>TED:<br>filamin<br>A, alpha<br>(actin<br>binding<br>protein<br>280) | gi 1946802<br>54 | 276,424.10 | 100.00% | 12 | 12 | 12 | 0.13% | 7.95% | IANLQT<br>DLSDGL<br>R               | 2.82 | 1,415.75 |
| ATP | 6006 | PREDIC<br>TED:<br>filamin<br>A, alpha<br>(actin<br>binding<br>protein<br>280) | gi 1946802<br>54 | 276,424.10 | 100.00% | 12 | 12 | 12 | 0.13% | 7.95% | LIALLEV<br>LSQK                     | 2.79 | 1,226.77 |
| ATP | 6006 | PREDIC<br>TED:<br>filamin<br>A, alpha<br>(actin<br>binding<br>protein<br>280) | gi 1946802<br>54 | 276,424.10 | 100.00% | 12 | 12 | 12 | 0.13% | 7.95% | LTVSSLQ<br>ESGLK                    | 3.08 | 1,261.70 |
| ATP | 6006 | PREDIC<br>TED:<br>filamin<br>A, alpha<br>(actin<br>binding<br>protein<br>280) | gi 1946802<br>54 | 276,424.10 | 100.00% | 12 | 12 | 12 | 0.13% | 7.95% | SPFEVY<br>VDKSQG<br>DASK            | 3    | 1,756.84 |
| ATP | 6006 | PREDIC<br>TED:<br>filamin<br>A, alpha<br>(actin<br>binding<br>protein<br>280) | gi 1946802<br>54 | 276,424.10 | 100.00% | 12 | 12 | 12 | 0.13% | 7.95% | SPFSVG<br>VSPSLDL<br>SK             | 3.43 | 1,519.80 |

|     |      |                                                         |                                    |            |         |    |    |    |       |        |                                             |          |
|-----|------|---------------------------------------------------------|------------------------------------|------------|---------|----|----|----|-------|--------|---------------------------------------------|----------|
| ATP | 6006 | PREDICTED: filamin A, alpha (actin binding protein 280) | gi194680254                        | 276,424.10 | 100.00% | 12 | 12 | 12 | 0.13% | 7.95%  | VAQPAIT 2.38<br>DNKDGT<br>VTVR              | 1,784.95 |
| ATP | 6006 | PREDICTED: filamin A, alpha (actin binding protein 280) | gi194680254                        | 276,424.10 | 100.00% | 12 | 12 | 12 | 0.13% | 7.95%  | VTAQGP 4.63<br>GLEPSG<br>NIANK              | 1,652.86 |
| ATP | 6006 | PREDICTED: filamin A, alpha (actin binding protein 280) | gi194680254                        | 276,424.10 | 100.00% | 12 | 12 | 12 | 0.13% | 7.95%  | YTPVQQ 3.23<br>GPVGIN<br>VTYGGD<br>AIPK     | 2,274.18 |
| ATP | 6006 | NRAS protein                                            | gi146186548,gi148226664            | 21,211.30  | 100.00% | 3  | 3  | 3  | 0.03% | 25.90% | SALTIQL 2.76<br>IQNHFV<br>DEYDPTI<br>EDSYRK | 3,095.53 |
| ATP | 6006 | NRAS protein                                            | gi146186548,gi148226664            | 21,211.30  | 100.00% | 3  | 3  | 3  | 0.03% | 25.90% | SFADINL 2.65<br>YR                          | 1,098.56 |
| ATP | 6006 | NRAS protein                                            | gi146186548,gi148226664            | 21,211.30  | 100.00% | 3  | 3  | 3  | 0.03% | 25.90% | TRQGVV 3.18<br>DAFYTL<br>VR                 | 1,654.85 |
| ATP | 6006 | synaptosomal-associated protein 23                      | gi115496868,gi152941114,gi83405332 | 23,209.50  | 100.00% | 7  | 12 | 17 | 0.18% | 29.90% | ANQVTD 3.16<br>ESLESTR                      | 1,449.68 |
| ATP | 6006 | synaptosomal-associated protein 23                      | gi115496868,gi152941114,gi83405332 | 23,209.50  | 100.00% | 7  | 12 | 17 | 0.18% | 29.90% | ANQVTD 2.8<br>ESLESTR<br>R                  | 1,605.78 |
| ATP | 6006 | synaptosomal-associated protein 23                      | gi115496868,gi152941114,gi83405332 | 23,209.50  | 100.00% | 7  | 12 | 17 | 0.18% | 29.90% | ILGLAIE 3.58<br>SQDAGI<br>K                 | 1,427.81 |
| ATP | 6006 | synaptosomal-associated protein 23                      | gi115496868,gi152941114,gi83405332 | 23,209.50  | 100.00% | 7  | 12 | 17 | 0.18% | 29.90% | TITMLDE 3.14<br>QGEQLK                      | 1,521.75 |
| ATP | 6006 | synaptosomal-associated protein 23                      | gi115496868,gi152941114,gi83405332 | 23,209.50  | 100.00% | 7  | 12 | 17 | 0.18% | 29.90% | TITMLDE 2.54<br>QGEQLK<br>R                 | 1,677.85 |
| ATP | 6006 | synaptosomal-associated protein 23                      | gi115496868,gi152941114,gi83405332 | 23,209.50  | 100.00% | 7  | 12 | 17 | 0.18% | 29.90% | VTNGQP 3.21<br>QQATAG<br>AASGGY<br>IK       | 1,918.96 |
| ATP | 6006 | synaptosomal-associated protein 23                      | gi115496868,gi152941114,gi83405332 | 23,209.50  | 100.00% | 7  | 12 | 17 | 0.18% | 29.90% | VTNGQP 2.94<br>QQATAG<br>AASGGY<br>IKR      | 2,075.06 |



|     |      |                                                                              |                                        |           |         |   |    |    |       |       |                                                  |          |
|-----|------|------------------------------------------------------------------------------|----------------------------------------|-----------|---------|---|----|----|-------|-------|--------------------------------------------------|----------|
| ATP | 6006 | Solute carrier family 1 (glutamate/neutral amino acid transporter), member 4 | gi 124828540,gi 126158903,gi 145566947 | 55,991.00 | 99.80%  | 2 | 2  | 2  | 0.02% | 7.55% | NLFPSNL 3.06<br>VVAAFR                           | 1,447.81 |
| ATP | 6006 | Solute carrier family 1 (glutamate/neutral amino acid transporter), member 4 | gi 124828540,gi 126158903,gi 145566947 | 55,991.00 | 99.80%  | 2 | 2  | 2  | 0.02% | 7.55% | SSETNG 3.63<br>YLDSAQ<br>EGPAAG<br>PGEPGT<br>TAR | 2,620.18 |
| ATP | 6006 | PREDICTED: ubiquitin C isoform 12                                            | gi 76638716                            | 77,556.00 | 100.00% | 6 | 10 | 16 | 0.17% | 7.97% | ESTLHL 2.74<br>VLR                               | 1,067.62 |
| ATP | 6006 | PREDICTED: ubiquitin C isoform 12                                            | gi 76638716                            | 77,556.00 | 100.00% | 6 | 10 | 16 | 0.17% | 7.97% | IQDKEGI 2.6<br>PPDQQR                            | 1,523.78 |
| ATP | 6006 | PREDICTED: ubiquitin C isoform 12                                            | gi 76638716                            | 77,556.00 | 100.00% | 6 | 10 | 16 | 0.17% | 7.97% | QLEDGR 3.27<br>TLSDYNI<br>QK                     | 1,779.89 |
| ATP | 6006 | PREDICTED: ubiquitin C isoform 12                                            | gi 76638716                            | 77,556.00 | 100.00% | 6 | 10 | 16 | 0.17% | 7.97% | TITLEVE 3.04<br>PSDTIEN<br>VK                    | 1,787.93 |
| ATP | 6006 | PREDICTED: ubiquitin C isoform 12                                            | gi 76638716                            | 77,556.00 | 100.00% | 6 | 10 | 16 | 0.17% | 7.97% | TITLEVE 3.74<br>PSDTIEN<br>VKAK                  | 1,987.06 |
| ATP | 6006 | PREDICTED: ubiquitin C isoform 12                                            | gi 76638716                            | 77,556.00 | 100.00% | 6 | 10 | 16 | 0.17% | 7.97% | TLSDYNI 4.17<br>QKESTL<br>HLVLR                  | 2,130.16 |
| ATP | 6006 | TPA: predicted NADPH oxidase-5                                               | gi 151427572,gi 155372001              | 86,454.40 | 99.90%  | 2 | 3  | 5  | 0.05% | 3.71% | AIGLQM 3.39<br>ALDLLA<br>K                       | 1,372.79 |
| ATP | 6006 | TPA: predicted NADPH oxidase-5                                               | gi 151427572,gi 155372001              | 86,454.40 | 99.90%  | 2 | 3  | 5  | 0.05% | 3.71% | MAALHI 3.92<br>VEVNLL<br>PSK                     | 1,650.92 |

|     |      |                                                                                                                                                    |            |         |    |    |    |       |        |                                 |          |
|-----|------|----------------------------------------------------------------------------------------------------------------------------------------------------|------------|---------|----|----|----|-------|--------|---------------------------------|----------|
| ATP | 6006 | RecName gi 1098948 : 69,gi 73586 Full=Sma 929,gi 7805 ll nuclear 0059 ribonucle oprotein Sm D1; Short=S m-D1; AltName: Full=snR NP core protein D1 | 13,263.90  | 99.80%  | 2  | 3  | 4  | 0.04% | 27.70% | NREPVQ 3.32 LETLSIR             | 1,554.86 |
| ATP | 6006 | RecName gi 1098948 : 69,gi 73586 Full=Sma 929,gi 7805 ll nuclear 0059 ribonucle oprotein Sm D1; Short=S m-D1; AltName: Full=snR NP core protein D1 | 13,263.90  | 99.80%  | 2  | 3  | 4  | 0.04% | 27.70% | YFILPDS 4.18 LPLDTLL VDVEPK     | 2,287.25 |
| ATP | 6006 | RecName gi 1221400 : 85,gi 74356 Full=Synt 383,gi 7805 axin-4 0061                                                                                 | 34,382.50  | 99.90%  | 2  | 2  | 2  | 0.02% | 10.10% | AIEPQKE 3.9 EADENY NSVNTR       | 2,207.02 |
| ATP | 6006 | RecName gi 1221400 : 85,gi 74356 Full=Synt 383,gi 7805 axin-4 0061                                                                                 | 34,382.50  | 99.90%  | 2  | 2  | 2  | 0.02% | 10.10% | NILSSAD 3.15 YVER               | 1,266.63 |
| ATP | 6006 | PREDIC TED: 9 ATPase, Ca++ transporti ng, cardiac muscle, slow twitch 2 isoform 1                                                                  | 109,762.30 | 100.00% | 13 | 15 | 21 | 0.22% | 18.40% | AFTGRE 3.72 FDELSPS AQR         | 1,810.87 |
| ATP | 6006 | PREDIC TED: 9 ATPase, Ca++ transporti ng, cardiac muscle, slow twitch 2 isoform 1                                                                  | 109,762.30 | 100.00% | 13 | 15 | 21 | 0.22% | 18.40% | AKDIVP 3.23 GDIVEIA VGDKVP ADIR | 2,390.33 |

|     |      |                                                                               |             |            |         |    |    |    |       |        |                            |      |          |
|-----|------|-------------------------------------------------------------------------------|-------------|------------|---------|----|----|----|-------|--------|----------------------------|------|----------|
| ATP | 6006 | PREDICTED: ATPase, Ca++ transporting, cardiac muscle, slow twitch 2 isoform 1 | gi 76639019 | 109,762.30 | 100.00% | 13 | 15 | 21 | 0.22% | 18.40% | AMGVV<br>VATGVN<br>TEIGK   | 4.18 | 1,561.83 |
| ATP | 6006 | PREDICTED: ATPase, Ca++ transporting, cardiac muscle, slow twitch 2 isoform 1 | gi 76639019 | 109,762.30 | 100.00% | 13 | 15 | 21 | 0.22% | 18.40% | EEMNLE<br>DSANFIK          | 2.86 | 1,555.69 |
| ATP | 6006 | PREDICTED: ATPase, Ca++ transporting, cardiac muscle, slow twitch 2 isoform 1 | gi 76639019 | 109,762.30 | 100.00% | 13 | 15 | 21 | 0.22% | 18.40% | EFTLEFS<br>R               | 1.99 | 1,028.50 |
| ATP | 6006 | PREDICTED: ATPase, Ca++ transporting, cardiac muscle, slow twitch 2 isoform 1 | gi 76639019 | 109,762.30 | 100.00% | 13 | 15 | 21 | 0.22% | 18.40% | KSEIGIA<br>MGSGTA<br>VAK   | 4.79 | 1,535.81 |
| ATP | 6006 | PREDICTED: ATPase, Ca++ transporting, cardiac muscle, slow twitch 2 isoform 1 | gi 76639019 | 109,762.30 | 100.00% | 13 | 15 | 21 | 0.22% | 18.40% | MNVFDT<br>ELK              | 2.49 | 1,112.53 |
| ATP | 6006 | PREDICTED: ATPase, Ca++ transporting, cardiac muscle, slow twitch 2 isoform 1 | gi 76639019 | 109,762.30 | 100.00% | 13 | 15 | 21 | 0.22% | 18.40% | NAENAIE<br>ALKEYE<br>PEMGK | 2.94 | 2,051.96 |

|     |      |                                                                                                                |            |            |         |    |    |    |       |        |                                               |      |          |
|-----|------|----------------------------------------------------------------------------------------------------------------|------------|------------|---------|----|----|----|-------|--------|-----------------------------------------------|------|----------|
| ATP | 6006 | PREDICTED: ATPase, Ca++ transporting, cardiac muscle, slow twitch 2 isoform 1                                  | gi 7663901 | 109,762.30 | 100.00% | 13 | 15 | 21 | 0.22% | 18.40% | NMLFSG<br>TNIAAG<br>K                         | 2.73 | 1,339.67 |
| ATP | 6006 | PREDICTED: ATPase, Ca++ transporting, cardiac muscle, slow twitch 2 isoform 1                                  | gi 7663901 | 109,762.30 | 100.00% | 13 | 15 | 21 | 0.22% | 18.40% | SEIGIAM<br>GSGTAV<br>AK                       | 4.25 | 1,407.72 |
| ATP | 6006 | PREDICTED: ATPase, Ca++ transporting, cardiac muscle, slow twitch 2 isoform 1                                  | gi 7663901 | 109,762.30 | 100.00% | 13 | 15 | 21 | 0.22% | 18.40% | TASEMV<br>LADDNF<br>STIVAAV<br>EEGR           | 3.48 | 2,441.15 |
| ATP | 6006 | PREDICTED: ATPase, Ca++ transporting, cardiac muscle, slow twitch 2 isoform 1                                  | gi 7663901 | 109,762.30 | 100.00% | 13 | 15 | 21 | 0.22% | 18.40% | VDQSILT<br>GESVSVI<br>K                       | 4.38 | 1,574.86 |
| ATP | 6006 | PREDICTED: ATPase, Ca++ transporting, cardiac muscle, slow twitch 2 isoform 1                                  | gi 7663901 | 109,762.30 | 100.00% | 13 | 15 | 21 | 0.22% | 18.40% | VGSTKV<br>PMTPGV<br>K                         | 2.97 | 1,316.72 |
| ATP | 6006 | PREDICTED: similar to solute carrier family 7 (cationic amino acid transporter, y+ system), member 2 isoform 2 | gi 1946791 | 71,681.50  | 100.00% | 3  | 5  | 5  | 0.05% | 7.75%  | HSLEGN<br>PRDEED<br>DDEDMY<br>SDNINA<br>ATEEK | 6.05 | 3,354.35 |

|     |      |                                                                                                                       |                               |            |         |   |   |   |       |       |                               |          |
|-----|------|-----------------------------------------------------------------------------------------------------------------------|-------------------------------|------------|---------|---|---|---|-------|-------|-------------------------------|----------|
| ATP | 6006 | PREDIC TED: 97<br>similar to solute carrier family 7 (cationic amino acid transporter, y+ system), member 2 isoform 2 | gi 1946791                    | 71,681.50  | 100.00% | 3 | 5 | 5 | 0.05% | 7.75% | IVTLDL 3.09<br>EDTK           | 1,233.66 |
| ATP | 6006 | PREDIC TED: 97<br>similar to solute carrier family 7 (cationic amino acid transporter, y+ system), member 2 isoform 2 | gi 1946791                    | 71,681.50  | 100.00% | 3 | 5 | 5 | 0.05% | 7.75% | NLSLPFI 2.42<br>FHEK          | 1,344.73 |
| ATP | 6006 | ENDOD 1 protein                                                                                                       | gi 1544255<br>75,gi 156523150 | 54,851.30  | 99.80%  | 2 | 2 | 2 | 0.02% | 4.20% | ILEVVN 4.22<br>QVQDEE<br>R    | 1,570.81 |
| ATP | 6006 | ENDOD 1 protein                                                                                                       | gi 1544255<br>75,gi 156523150 | 54,851.30  | 99.80%  | 2 | 2 | 2 | 0.02% | 4.20% | IPVYSAF 2.12<br>R             | 952.525  |
| ATP | 6006 | PREDIC TED: 45<br>similar to hCG1980 844                                                                              | gi 1946749                    | 298,419.90 | 100.00% | 3 | 3 | 3 | 0.03% | 1.29% | LDLKDIP 3.52<br>NAIR          | 1,267.74 |
| ATP | 6006 | PREDIC TED: 45<br>similar to hCG1980 844                                                                              | gi 1946749                    | 298,419.90 | 100.00% | 3 | 3 | 3 | 0.03% | 1.29% | QLQPNE 3.49<br>EADYLG<br>VR   | 1,631.80 |
| ATP | 6006 | PREDIC TED: 45<br>similar to hCG1980 844                                                                              | gi 1946749                    | 298,419.90 | 100.00% | 3 | 3 | 3 | 0.03% | 1.29% | YLLTQE 2.95<br>LLR            | 1,148.67 |
| ATP | 6006 | PREDIC TED: 4<br>similar to karyopherin beta 1 isoform 2                                                              | gi 7664462                    | 97,210.30  | 100.00% | 2 | 2 | 2 | 0.02% | 3.54% | AAVENL 3.63<br>PTFLVEL<br>SR  | 1,658.91 |
| ATP | 6006 | PREDIC TED: 4<br>similar to karyopherin beta 1 isoform 2                                                              | gi 7664462                    | 97,210.30  | 100.00% | 2 | 2 | 2 | 0.02% | 3.54% | LLETTD 2.35<br>RPDGHQ<br>NNLR | 1,878.94 |

|     |      |                                                                           |            |            |         |   |   |    |       |        |                      |      |          |
|-----|------|---------------------------------------------------------------------------|------------|------------|---------|---|---|----|-------|--------|----------------------|------|----------|
| ATP | 6006 | PREDIC TED: 74<br>similar to potassium-chloride cotransporter-1 isoform 2 | gi 1946750 | 120,598.40 | 99.90%  | 2 | 2 | 2  | 0.02% | 1.75%  | DNIIPFLR             | 2.12 | 987.5623 |
| ATP | 6006 | PREDIC TED: 74<br>similar to potassium-chloride cotransporter-1 isoform 2 | gi 1946750 | 120,598.40 | 99.90%  | 2 | 2 | 2  | 0.02% | 1.75%  | LVLNLM PGPPK         | 2.92 | 1,194.69 |
| ATP | 6006 | PREDIC TED: 53<br>similar to ephrin receptor EphA2                        | gi 1198889 | 107,900.50 | 100.00% | 9 | 9 | 10 | 0.11% | 10.80% | EKDGEF SVLQLV GMLR   | 3.46 | 1,836.95 |
| ATP | 6006 | PREDIC TED: 53<br>similar to ephrin receptor EphA2                        | gi 1198889 | 107,900.50 | 100.00% | 9 | 9 | 10 | 0.11% | 10.80% | EVVLLD FAAAK         | 2.76 | 1,175.67 |
| ATP | 6006 | PREDIC TED: 53<br>similar to ephrin receptor EphA2                        | gi 1198889 | 107,900.50 | 100.00% | 9 | 9 | 10 | 0.11% | 10.80% | FADIVSI LDK          | 3.73 | 1,120.63 |
| ATP | 6006 | PREDIC TED: 53<br>similar to ephrin receptor EphA2                        | gi 1198889 | 107,900.50 | 100.00% | 9 | 9 | 10 | 0.11% | 10.80% | FADIVSI LDKLIR       | 3.33 | 1,502.89 |
| ATP | 6006 | PREDIC TED: 53<br>similar to ephrin receptor EphA2                        | gi 1198889 | 107,900.50 | 100.00% | 9 | 9 | 10 | 0.11% | 10.80% | IDTIAPD EITGSSD FEAR | 4.12 | 1,936.91 |
| ATP | 6006 | PREDIC TED: 53<br>similar to ephrin receptor EphA2                        | gi 1198889 | 107,900.50 | 100.00% | 9 | 9 | 10 | 0.11% | 10.80% | TLADFD PR            | 2.44 | 934.463  |
| ATP | 6006 | PREDIC TED: 53<br>similar to ephrin receptor EphA2                        | gi 1198889 | 107,900.50 | 100.00% | 9 | 9 | 10 | 0.11% | 10.80% | TYVDPH TYEDPN QAVLK  | 1.96 | 1,989.96 |
| ATP | 6006 | PREDIC TED: 53<br>similar to ephrin receptor EphA2                        | gi 1198889 | 107,900.50 | 100.00% | 9 | 9 | 10 | 0.11% | 10.80% | VIGAGEF GEVYK        | 2.58 | 1,268.65 |

|     |      |                                                       |                                                   |            |         |   |    |    |       |        |                                    |          |
|-----|------|-------------------------------------------------------|---------------------------------------------------|------------|---------|---|----|----|-------|--------|------------------------------------|----------|
| ATP | 6006 | PREDICTED:<br>similar to ephrin receptor EphA2        | gi 119888953                                      | 107,900.50 | 100.00% | 9 | 9  | 10 | 0.11% | 10.80% | YSEPPLG LTR 2.51                   | 1,132.60 |
| ATP | 6006 | Progesterone receptor membrane component 1            | gi 109659385,gi 115495221,gi 116248575,gi 7689365 | 21,605.30  | 100.00% | 4 | 4  | 5  | 0.05% | 23.20% | DFTPAEL R 2.05                     | 948.4786 |
| ATP | 6006 | Progesterone receptor membrane component 1            | gi 109659385,gi 115495221,gi 116248575,gi 7689365 | 21,605.30  | 100.00% | 4 | 4  | 5  | 0.05% | 23.20% | FYGPEG PYGVFA GR 2.63              | 1,516.72 |
| ATP | 6006 | Progesterone receptor membrane component 1            | gi 109659385,gi 115495221,gi 116248575,gi 7689365 | 21,605.30  | 100.00% | 4 | 4  | 5  | 0.05% | 23.20% | IVRGDQ PAASDS DDDEPP PLPR 4.48     | 2,347.12 |
| ATP | 6006 | Progesterone receptor membrane component 1            | gi 109659385,gi 115495221,gi 116248575,gi 7689365 | 21,605.30  | 100.00% | 4 | 4  | 5  | 0.05% | 23.20% | KFYGPE GPYGVF AGR 4.51             | 1,644.82 |
| ATP | 6006 | PTPN1 protein                                         | gi 151556032,gi 154152077                         | 49,019.80  | 100.00% | 3 | 3  | 3  | 0.03% | 8.24%  | FSYLAVI EGAK 3.78                  | 1,197.65 |
| ATP | 6006 | PTPN1 protein                                         | gi 151556032,gi 154152077                         | 49,019.80  | 100.00% | 3 | 3  | 3  | 0.03% | 8.24%  | QLELEN LMSRETR 2.68                | 1,634.82 |
| ATP | 6006 | PTPN1 protein                                         | gi 151556032,gi 154152077                         | 49,019.80  | 100.00% | 3 | 3  | 3  | 0.03% | 8.24%  | YRDVSP FDHSR 3.64                  | 1,378.65 |
| ATP | 6006 | PREDICTED:<br>heat shock 60kDa protein 1 (chaperonin) | gi 119888228                                      | 75,015.00  | 99.90%  | 2 | 3  | 3  | 0.03% | 5.12%  | LVQDVA NNTNEE AGDGTT TATVLA R 5.17 | 2,560.25 |
| ATP | 6006 | PREDICTED:<br>heat shock 60kDa protein 1 (chaperonin) | gi 119888228                                      | 75,015.00  | 99.90%  | 2 | 3  | 3  | 0.03% | 5.12%  | TLKIPA MTIAK 2.18                  | 1,202.72 |
| ATP | 6006 | CYB5R3 protein                                        | gi 148877441,gi 157151718,gi 162941,gi 1709233    | 33,973.70  | 100.00% | 9 | 15 | 23 | 0.24% | 35.70% | DILLRPE LEELR 2.55                 | 1,495.85 |
| ATP | 6006 | CYB5R3 protein                                        | gi 148877441,gi 157151718,gi 162941,gi 1709233    | 33,973.70  | 100.00% | 9 | 15 | 23 | 0.24% | 35.70% | GPNGLL VYQGK 3.78                  | 1,145.63 |

|     |      |                                           |                                                                |            |         |   |    |    |       |        |                                             |      |          |
|-----|------|-------------------------------------------|----------------------------------------------------------------|------------|---------|---|----|----|-------|--------|---------------------------------------------|------|----------|
| ATP | 6006 | CYB5R3 protein                            | gi 1488774<br>41.gi 15715<br>1718.gi 162<br>941.gi 1709<br>233 | 33,973.70  | 100.00% | 9 | 15 | 23 | 0.24% | 35.70% | IDGNLVI<br>RPYTPV<br>SSDDDK<br>GFVDLVI<br>K | 2.87 | 2,975.57 |
| ATP | 6006 | CYB5R3 protein                            | gi 1488774<br>41.gi 15715<br>1718.gi 162<br>941.gi 1709<br>233 | 33,973.70  | 100.00% | 9 | 15 | 23 | 0.24% | 35.70% | IGDTIEF<br>R                                | 2.57 | 950.4943 |
| ATP | 6006 | CYB5R3 protein                            | gi 1488774<br>41.gi 15715<br>1718.gi 162<br>941.gi 1709<br>233 | 33,973.70  | 100.00% | 9 | 15 | 23 | 0.24% | 35.70% | IGDTIEF<br>RGPNGL<br>LVYQGK                 | 2.85 | 2,077.11 |
| ATP | 6006 | CYB5R3 protein                            | gi 1488774<br>41.gi 15715<br>1718.gi 162<br>941.gi 1709<br>233 | 33,973.70  | 100.00% | 9 | 15 | 23 | 0.24% | 35.70% | LIDKEVI<br>SHDTR                            | 3.89 | 1,425.77 |
| ATP | 6006 | CYB5R3 protein                            | gi 1488774<br>41.gi 15715<br>1718.gi 162<br>941.gi 1709<br>233 | 33,973.70  | 100.00% | 9 | 15 | 23 | 0.24% | 35.70% | LIDKEVI<br>SHDTRR                           | 2.91 | 1,581.87 |
| ATP | 6006 | CYB5R3 protein                            | gi 1488774<br>41.gi 15715<br>1718.gi 162<br>941.gi 1709<br>233 | 33,973.70  | 100.00% | 9 | 15 | 23 | 0.24% | 35.70% | STPAITL<br>ENPDIKY<br>PLR                   | 4.42 | 1,928.05 |
| ATP | 6006 | CYB5R3 protein                            | gi 1488774<br>41.gi 15715<br>1718.gi 162<br>941.gi 1709<br>233 | 33,973.70  | 100.00% | 9 | 15 | 23 | 0.24% | 35.70% | SVGMI<br>GGTGITP<br>MLQVIR                  | 5.11 | 1,917.03 |
| ATP | 6006 | endothelial cell adhesion molecule        | gi 1181512<br>18.gi 11991<br>9027.gi 868<br>23868              | 41,779.80  | 100.00% | 3 | 5  | 5  | 0.05% | 9.34%  | ALEEPA<br>NDIKED<br>AIAPR                   | 3.53 | 1,851.94 |
| ATP | 6006 | endothelial cell adhesion molecule        | gi 1181512<br>18.gi 11991<br>9027.gi 868<br>23868              | 41,779.80  | 100.00% | 3 | 5  | 5  | 0.05% | 9.34%  | GKALEE<br>PANDIKE<br>DAIAPR                 | 4.35 | 2,037.06 |
| ATP | 6006 | endothelial cell adhesion molecule        | gi 1181512<br>18.gi 11991<br>9027.gi 868<br>23868              | 41,779.80  | 100.00% | 3 | 5  | 5  | 0.05% | 9.34%  | GSDTISK<br>NGTLSS<br>VTSAR                  | 3.22 | 1,780.90 |
| ATP | 6006 | PREDICTED: heparan sulfate proteoglycan 2 | gi 1198889<br>79                                               | 467,987.40 | 100.00% | 5 | 5  | 5  | 0.05% | 1.94%  | GTLEPV<br>QRPDVV<br>LVGAGH<br>R             | 3.25 | 2,000.10 |
| ATP | 6006 | PREDICTED: heparan sulfate proteoglycan 2 | gi 1198889<br>79                                               | 467,987.40 | 100.00% | 5 | 5  | 5  | 0.05% | 1.94%  | HPTPLAL<br>GQFHTV<br>TLLR                   | 3.14 | 1,901.08 |
| ATP | 6006 | PREDICTED: heparan sulfate proteoglycan 2 | gi 1198889<br>79                                               | 467,987.40 | 100.00% | 5 | 5  | 5  | 0.05% | 1.94%  | LRPGIVQ<br>SGGIVR                           | 3.72 | 1,351.82 |



|     |      |                                            |            |            |         |    |    |    |       |        |                                           |          |
|-----|------|--------------------------------------------|------------|------------|---------|----|----|----|-------|--------|-------------------------------------------|----------|
| ATP | 6006 | PREDIC TED: heparan sulfate proteoglycan 2 | gi 1198889 | 467,987.40 | 100.00% | 5  | 5  | 5  | 0.05% | 1.94%  | LRSPVISI 6.08<br>DPPSSTV<br>QQGQDA<br>SFK | 2,557.33 |
| ATP | 6006 | PREDIC TED: heparan sulfate proteoglycan 2 | gi 1198889 | 467,987.40 | 100.00% | 5  | 5  | 5  | 0.05% | 1.94%  | SVVPQG 2.25<br>GPHSLR                     | 1,233.67 |
| ATP | 6006 | PREDIC TED: keratin 19 isoform 8           | gi 1946761 | 51,863.50  | 100.00% | 13 | 15 | 17 | 0.18% | 28.10% | ALEEAN 2.73<br>ADLEVK                     | 1,301.66 |
| ATP | 6006 | PREDIC TED: keratin 19 isoform 8           | gi 1946761 | 51,863.50  | 100.00% | 13 | 15 | 17 | 0.18% | 28.10% | ASLENSL 3.15<br>EETKGR                    | 1,433.72 |
| ATP | 6006 | PREDIC TED: keratin 19 isoform 8           | gi 1946761 | 51,863.50  | 100.00% | 13 | 15 | 17 | 0.18% | 28.10% | ILNEMR 3.05<br>DQYEK                      | 1,438.70 |
| ATP | 6006 | PREDIC TED: keratin 19 isoform 8           | gi 1946761 | 51,863.50  | 100.00% | 13 | 15 | 17 | 0.18% | 28.10% | ILNEMR 3.56<br>DQYEKM<br>AEK              | 1,913.91 |
| ATP | 6006 | PREDIC TED: keratin 19 isoform 8           | gi 1946761 | 51,863.50  | 100.00% | 13 | 15 | 17 | 0.18% | 28.10% | LASYLD 3.06<br>KVR                        | 1,064.61 |
| ATP | 6006 | PREDIC TED: keratin 19 isoform 8           | gi 1946761 | 51,863.50  | 100.00% | 13 | 15 | 17 | 0.18% | 28.10% | LLEGED 5.06<br>AHLSSS<br>QFSSGS<br>QSSR   | 2,309.06 |
| ATP | 6006 | PREDIC TED: keratin 19 isoform 8           | gi 1946761 | 51,863.50  | 100.00% | 13 | 15 | 17 | 0.18% | 28.10% | QRPAEIK 3.12<br>DYSPYF<br>K               | 1,741.89 |
| ATP | 6006 | PREDIC TED: keratin 19 isoform 8           | gi 1946761 | 51,863.50  | 100.00% | 13 | 15 | 17 | 0.18% | 28.10% | TEELNR 3.77<br>EVATNS<br>ELVQSG<br>K      | 2,104.05 |
| ATP | 6006 | PREDIC TED: keratin 19 isoform 8           | gi 1946761 | 51,863.50  | 100.00% | 13 | 15 | 17 | 0.18% | 28.10% | TRLEQEI 3.86<br>ATYR                      | 1,379.73 |
| ATP | 6006 | PREDIC TED: keratin 19 isoform 8           | gi 1946761 | 51,863.50  | 100.00% | 13 | 15 | 17 | 0.18% | 28.10% | TRLEQEI 3.97<br>ATYRR                     | 1,535.83 |
| ATP | 6006 | PREDIC TED: keratin 19 isoform 8           | gi 1946761 | 51,863.50  | 100.00% | 13 | 15 | 17 | 0.18% | 28.10% | VLDELT 4<br>LAR                           | 1,029.59 |

|     |      |                                  |                                        |            |         |    |    |    |       |        |                                                     |          |
|-----|------|----------------------------------|----------------------------------------|------------|---------|----|----|----|-------|--------|-----------------------------------------------------|----------|
| ATP | 6006 | PREDIC TED: keratin 19 isoform 8 | gi 194676168                           | 51,863.50  | 100.00% | 13 | 15 | 17 | 0.18% | 28.10% | VTMQNL 2.46<br>NDRLAS<br>YLDK                       | 1,896.95 |
| ATP | 6006 | PREDIC TED: keratin 19 isoform 8 | gi 194676168                           | 51,863.50  | 100.00% | 13 | 15 | 17 | 0.18% | 28.10% | VTMQNL 2.2<br>NDRLAS<br>YLDKVR                      | 2,152.12 |
| ATP | 6006 | Transmembrane protein 49         | gi 111307060,gi 115496266,gi 122133514 | 46,165.40  | 99.80%  | 2  | 2  | 2  | 0.02% | 12.60% | LSGAEP 4.73<br>DDEEYQ<br>EFEEML<br>EHAETA<br>QDFASR | 3,489.46 |
| ATP | 6006 | Transmembrane protein 49         | gi 111307060,gi 115496266,gi 122133514 | 46,165.40  | 99.80%  | 2  | 2  | 2  | 0.02% | 12.60% | VAMNKE 4.59<br>QYNGNF<br>TDPSSV<br>NEK              | 2,388.08 |
| ATP | 6006 | KRT5 protein                     | gi 146186887,gi 56710317               | 62,920.60  | 100.00% | 6  | 10 | 15 | 0.16% | 11.60% | FASFIDK 2.12<br>VR                                  | 1,082.60 |
| ATP | 6006 | KRT5 protein                     | gi 146186887,gi 56710317               | 62,920.60  | 100.00% | 6  | 10 | 15 | 0.16% | 11.60% | NKYEDE 2.84<br>INKR                                 | 1,308.65 |
| ATP | 6006 | KRT5 protein                     | gi 146186887,gi 56710317               | 62,920.60  | 100.00% | 6  | 10 | 15 | 0.16% | 11.60% | SFSTASA 3.93<br>ITPSVSR                             | 1,410.72 |
| ATP | 6006 | KRT5 protein                     | gi 146186887,gi 56710317               | 62,920.60  | 100.00% | 6  | 10 | 15 | 0.16% | 11.60% | SLDLDSII 4.84<br>AEVK                               | 1,302.72 |
| ATP | 6006 | KRT5 protein                     | gi 146186887,gi 56710317               | 62,920.60  | 100.00% | 6  | 10 | 15 | 0.16% | 11.60% | TEAESW 4.58<br>YQTKYE<br>ELQQTA<br>GR               | 2,418.12 |
| ATP | 6006 | KRT5 protein                     | gi 146186887,gi 56710317               | 62,920.60  | 100.00% | 6  | 10 | 15 | 0.16% | 11.60% | TLNNKF 4.1<br>ASFIDKV<br>R                          | 1,652.91 |
| ATP | 6006 | CLPTM1 L protein                 | gi 126010733,gi 126723356,gi 187470818 | 62,084.20  | 99.80%  | 2  | 2  | 2  | 0.02% | 6.69%  | MTVIWR 2.25<br>GLWPTF<br>QFGTYS<br>ESERR            | 2,847.40 |
| ATP | 6006 | CLPTM1 L protein                 | gi 126010733,gi 126723356,gi 187470818 | 62,084.20  | 99.80%  | 2  | 2  | 2  | 0.02% | 6.69%  | SSTELPL 2.71<br>TVSYDK                              | 1,439.73 |
| ATP | 6006 | PREDIC TED: similar to CG2943-PA | gi 119888913                           | 115,925.80 | 100.00% | 4  | 4  | 4  | 0.04% | 7.92%  | ALVQTE 3.96<br>DHLLFL<br>QQLAGR                     | 2,165.21 |
| ATP | 6006 | PREDIC TED: similar to CG2943-PA | gi 119888913                           | 115,925.80 | 100.00% | 4  | 4  | 4  | 0.04% | 7.92%  | HLLVGL 4.54<br>PSGAILS<br>LPK                       | 1,614.99 |
| ATP | 6006 | PREDIC TED: similar to CG2943-PA | gi 119888913                           | 115,925.80 | 100.00% | 4  | 4  | 4  | 0.04% | 7.92%  | QLHELA 2.67<br>PSIFFYL<br>VDADQG<br>R               | 2,319.18 |
| ATP | 6006 | PREDIC TED: similar to CG2943-PA | gi 119888913                           | 115,925.80 | 100.00% | 4  | 4  | 4  | 0.04% | 7.92%  | RPEIPTE 3.29<br>QSREEN<br>LIPYSPD<br>VQIHAE<br>R    | 3,203.61 |

|     |      |                                                                              |                                                    |           |         |   |   |   |       |        |                                     |      |          |
|-----|------|------------------------------------------------------------------------------|----------------------------------------------------|-----------|---------|---|---|---|-------|--------|-------------------------------------|------|----------|
| ATP | 6006 | SFXN3<br>protein                                                             | gi 1515541<br>23,gi 15612<br>0541,gi 206<br>558262 | 35,690.00 | 100.00% | 3 | 4 | 5 | 0.05% | 14.00% | AQIQEQ<br>NPSIEVV<br>YYNK           | 3.91 | 2,023.01 |
| ATP | 6006 | SFXN3<br>protein                                                             | gi 1515541<br>23,gi 15612<br>0541,gi 206<br>558262 | 35,690.00 | 100.00% | 3 | 4 | 5 | 0.05% | 14.00% | ELQVGIP<br>VTNEQG<br>QR             | 2.49 | 1,667.87 |
| ATP | 6006 | SFXN3<br>protein                                                             | gi 1515541<br>23,gi 15612<br>0541,gi 206<br>558262 | 35,690.00 | 100.00% | 3 | 4 | 5 | 0.05% | 14.00% | NLLLSG<br>AQLEAS<br>R               | 4.7  | 1,371.76 |
| ATP | 6006 | RecName<br>:<br>Full=CD<br>81<br>antigen;<br>AltName:<br>CD_antig<br>en=CD81 | gi 1221409<br>14,gi 73586<br>978,gi 7804<br>2548   | 25,835.90 | 99.80%  | 2 | 3 | 3 | 0.03% | 9.75%  | DVKQFY<br>DQALQQ<br>AIVDDD<br>ANNAK | 4.59 | 2,609.25 |
| ATP | 6006 | RecName<br>:<br>Full=CD<br>81<br>antigen;<br>AltName:<br>CD_antig<br>en=CD81 | gi 1221409<br>14,gi 73586<br>978,gi 7804<br>2548   | 25,835.90 | 99.80%  | 2 | 3 | 3 | 0.03% | 9.75%  | QFYDQA<br>LQQAIV<br>DDDANN<br>AK    | 5.18 | 2,267.06 |
| ATP | 6006 | RAB21,<br>member<br>RAS<br>oncogene<br>family                                | gi 1096581<br>86,gi 11549<br>6760,gi 122<br>144675 | 24,128.60 | 99.80%  | 2 | 2 | 2 | 0.02% | 12.20% | FHALGPI<br>YYR                      | 2.89 | 1,236.65 |
| ATP | 6006 | RAB21,<br>member<br>RAS<br>oncogene<br>family                                | gi 1096581<br>86,gi 11549<br>6760,gi 122<br>144675 | 24,128.60 | 99.80%  | 2 | 2 | 2 | 0.02% | 12.20% | HVSIQEA<br>ESYAES<br>VGAK           | 3.87 | 1,804.87 |
| ATP | 6006 | 2',5'-<br>oligoaden<br>ylate<br>synthetas<br>e 1,<br>40/46kDa                | gi 1584549<br>90,gi 37953<br>332,gi 9496<br>7004   | 45,118.40 | 100.00% | 4 | 5 | 6 | 0.06% | 12.90% | ALSFVL<br>R                         | 1.9  | 805.493  |
| ATP | 6006 | 2',5'-<br>oligoaden<br>ylate<br>synthetas<br>e 1,<br>40/46kDa                | gi 1584549<br>90,gi 37953<br>332,gi 9496<br>7004   | 45,118.40 | 100.00% | 4 | 5 | 6 | 0.06% | 12.90% | LNQAVE<br>FDVLPA<br>FDALGQ<br>LTK   | 5.06 | 2,289.21 |
| ATP | 6006 | 2',5'-<br>oligoaden<br>ylate<br>synthetas<br>e 1,<br>40/46kDa                | gi 1584549<br>90,gi 37953<br>332,gi 9496<br>7004   | 45,118.40 | 100.00% | 4 | 5 | 6 | 0.06% | 12.90% | PRPVILD<br>PADPTG<br>NVAGK          | 3.65 | 1,816.99 |
| ATP | 6006 | 2',5'-<br>oligoaden<br>ylate<br>synthetas<br>e 1,<br>40/46kDa                | gi 1584549<br>90,gi 37953<br>332,gi 9496<br>7004   | 45,118.40 | 100.00% | 4 | 5 | 6 | 0.06% | 12.90% | QLAKPR<br>PVILDPA<br>DPTGNV<br>AGK  | 2.38 | 2,257.27 |

|     |      |                   |                                                  |           |         |    |    |    |       |        |                                                |      |          |
|-----|------|-------------------|--------------------------------------------------|-----------|---------|----|----|----|-------|--------|------------------------------------------------|------|----------|
| ATP | 6006 | Actin,<br>gamma 1 | gi 1515543<br>60,gi 74354<br>242,gi 7581<br>2932 | 41,775.90 | 100.00% | 16 | 26 | 52 | 0.55% | 48.80% | AVFPSIV<br>GRPR                                | 3.17 | 1,198.71 |
| ATP | 6006 | Actin,<br>gamma 1 | gi 1515543<br>60,gi 74354<br>242,gi 7581<br>2932 | 41,775.90 | 100.00% | 16 | 26 | 52 | 0.55% | 48.80% | DLTDYL<br>MK                                   | 2.38 | 1,014.48 |
| ATP | 6006 | Actin,<br>gamma 1 | gi 1515543<br>60,gi 74354<br>242,gi 7581<br>2932 | 41,775.90 | 100.00% | 16 | 26 | 52 | 0.55% | 48.80% | DLYANT<br>VLSGGT<br>TMYPGI<br>ADR              | 4.71 | 2,231.07 |
| ATP | 6006 | Actin,<br>gamma 1 | gi 1515543<br>60,gi 74354<br>242,gi 7581<br>2932 | 41,775.90 | 100.00% | 16 | 26 | 52 | 0.55% | 48.80% | EITALAP<br>STMK                                | 2.81 | 1,161.62 |
| ATP | 6006 | Actin,<br>gamma 1 | gi 1515543<br>60,gi 74354<br>242,gi 7581<br>2932 | 41,775.90 | 100.00% | 16 | 26 | 52 | 0.55% | 48.80% | GYSFTT<br>TAER                                 | 3.24 | 1,132.53 |
| ATP | 6006 | Actin,<br>gamma 1 | gi 1515543<br>60,gi 74354<br>242,gi 7581<br>2932 | 41,775.90 | 100.00% | 16 | 26 | 52 | 0.55% | 48.80% | GYSFTT<br>TAEREIV<br>R                         | 1.81 | 1,629.82 |
| ATP | 6006 | Actin,<br>gamma 1 | gi 1515543<br>60,gi 74354<br>242,gi 7581<br>2932 | 41,775.90 | 100.00% | 16 | 26 | 52 | 0.55% | 48.80% | HQGVM<br>VGMGQ<br>KDSYVG<br>DEAQS<br>K<br>R    | 3.13 | 2,507.18 |
| ATP | 6006 | Actin,<br>gamma 1 | gi 1515543<br>60,gi 74354<br>242,gi 7581<br>2932 | 41,775.90 | 100.00% | 16 | 26 | 52 | 0.55% | 48.80% | IKIAPPE<br>R                                   | 2.89 | 1,036.65 |
| ATP | 6006 | Actin,<br>gamma 1 | gi 1515543<br>60,gi 74354<br>242,gi 7581<br>2932 | 41,775.90 | 100.00% | 16 | 26 | 52 | 0.55% | 48.80% | IKIAPPE<br>RK                                  | 2.84 | 1,164.75 |
| ATP | 6006 | Actin,<br>gamma 1 | gi 1515543<br>60,gi 74354<br>242,gi 7581<br>2932 | 41,775.90 | 100.00% | 16 | 26 | 52 | 0.55% | 48.80% | KDLYAN<br>TVLSGG<br>TTMYPG<br>IADR             | 5.18 | 2,359.16 |
| ATP | 6006 | Actin,<br>gamma 1 | gi 1515543<br>60,gi 74354<br>242,gi 7581<br>2932 | 41,775.90 | 100.00% | 16 | 26 | 52 | 0.55% | 48.80% | LDLAGR<br>DLTDYL<br>MK                         | 3.45 | 1,639.84 |
| ATP | 6006 | Actin,<br>gamma 1 | gi 1515543<br>60,gi 74354<br>242,gi 7581<br>2932 | 41,775.90 | 100.00% | 16 | 26 | 52 | 0.55% | 48.80% | QEYDES<br>GPSIVHR                              | 2.88 | 1,516.70 |
| ATP | 6006 | Actin,<br>gamma 1 | gi 1515543<br>60,gi 74354<br>242,gi 7581<br>2932 | 41,775.90 | 100.00% | 16 | 26 | 52 | 0.55% | 48.80% | QEYDES<br>GPSIVHR<br>K                         | 2.52 | 1,644.80 |
| ATP | 6006 | Actin,<br>gamma 1 | gi 1515543<br>60,gi 74354<br>242,gi 7581<br>2932 | 41,775.90 | 100.00% | 16 | 26 | 52 | 0.55% | 48.80% | SYELPD<br>GQVITIG<br>NER                       | 4    | 1,790.89 |
| ATP | 6006 | Actin,<br>gamma 1 | gi 1515543<br>60,gi 74354<br>242,gi 7581<br>2932 | 41,775.90 | 100.00% | 16 | 26 | 52 | 0.55% | 48.80% | TTGIVM<br>DSGDGV<br>THTVPIY<br>EGYALP<br>HAILR | 5.71 | 3,199.61 |
| ATP | 6006 | Actin,<br>gamma 1 | gi 1515543<br>60,gi 74354<br>242,gi 7581<br>2932 | 41,775.90 | 100.00% | 16 | 26 | 52 | 0.55% | 48.80% | VAPEEH<br>PVLLTE<br>APLNPK                     | 4.32 | 1,954.06 |
| ATP | 6006 | PDIA3<br>protein  | gi 1461869<br>33,gi 14823<br>0374                | 56,913.80 | 100.00% | 14 | 16 | 18 | 0.19% | 30.90% | EATNPP<br>VIQEEKP<br>K                         | 3.26 | 1,579.83 |

|     |      |                   |                                   |           |         |    |    |    |       |        |                                            |          |
|-----|------|-------------------|-----------------------------------|-----------|---------|----|----|----|-------|--------|--------------------------------------------|----------|
| ATP | 6006 | PDIA3<br>protein  | gi 1461869<br>33,gi 14823<br>0374 | 56,913.80 | 100.00% | 14 | 16 | 18 | 0.19% | 30.90% | ELSDFIS 2.1<br>YLK                         | 1,214.63 |
| ATP | 6006 | PDIA3<br>protein  | gi 1461869<br>33,gi 14823<br>0374 | 56,913.80 | 100.00% | 14 | 16 | 18 | 0.19% | 30.90% | ELSDFIS 1.49<br>YLKR                       | 1,370.73 |
| ATP | 6006 | PDIA3<br>protein  | gi 1461869<br>33,gi 14823<br>0374 | 56,913.80 | 100.00% | 14 | 16 | 18 | 0.19% | 30.90% | FLEDYF 3.45<br>DGNLKR                      | 1,516.74 |
| ATP | 6006 | PDIA3<br>protein  | gi 1461869<br>33,gi 14823<br>0374 | 56,913.80 | 100.00% | 14 | 16 | 18 | 0.19% | 30.90% | FVMQEE 2.71<br>FSR                         | 1,188.54 |
| ATP | 6006 | PDIA3<br>protein  | gi 1461869<br>33,gi 14823<br>0374 | 56,913.80 | 100.00% | 14 | 16 | 18 | 0.19% | 30.90% | GFPTIYF 3.06<br>SPANKK                     | 1,469.78 |
| ATP | 6006 | PDIA3<br>protein  | gi 1461869<br>33,gi 14823<br>0374 | 56,913.80 | 100.00% | 14 | 16 | 18 | 0.19% | 30.90% | IFRDGEE 5.02<br>SGAYDG<br>PR               | 1,668.76 |
| ATP | 6006 | PDIA3<br>protein  | gi 1461869<br>33,gi 14823<br>0374 | 56,913.80 | 100.00% | 14 | 16 | 18 | 0.19% | 30.90% | KLHFAV 2.23<br>ASR                         | 1,028.60 |
| ATP | 6006 | PDIA3<br>protein  | gi 1461869<br>33,gi 14823<br>0374 | 56,913.80 | 100.00% | 14 | 16 | 18 | 0.19% | 30.90% | KTFSHEL 3.66<br>SDFGLES<br>TTGEIPV<br>VAVR | 2,719.39 |
| ATP | 6006 | PDIA3<br>protein  | gi 1461869<br>33,gi 14823<br>0374 | 56,913.80 | 100.00% | 14 | 16 | 18 | 0.19% | 30.90% | LRKDPNI 3.31<br>VIK                        | 1,266.79 |
| ATP | 6006 | PDIA3<br>protein  | gi 1461869<br>33,gi 14823<br>0374 | 56,913.80 | 100.00% | 14 | 16 | 18 | 0.19% | 30.90% | MDATAN 4.38<br>DVPSPY<br>EVR               | 1,680.75 |
| ATP | 6006 | PDIA3<br>protein  | gi 1461869<br>33,gi 14823<br>0374 | 56,913.80 | 100.00% | 14 | 16 | 18 | 0.19% | 30.90% | TFSHEL 3.21<br>DFGLEST<br>TGEIPVV<br>AVR   | 2,591.30 |
| ATP | 6006 | PDIA3<br>protein  | gi 1461869<br>33,gi 14823<br>0374 | 56,913.80 | 100.00% | 14 | 16 | 18 | 0.19% | 30.90% | VDCTAN 2.76<br>TNTCNK<br>YGVSGY<br>PTLK    | 2,349.09 |
| ATP | 6006 | PDIA3<br>protein  | gi 1461869<br>33,gi 14823<br>0374 | 56,913.80 | 100.00% | 14 | 16 | 18 | 0.19% | 30.90% | YGVSGY 2.34<br>PTLK                        | 1,084.57 |
| ATP | 6006 | PECAM1<br>protein | gi 1113085<br>31                  | 82,597.50 | 100.00% | 8  | 11 | 20 | 0.21% | 10.60% | APVHFTI 2.52<br>EK                         | 1,041.57 |
| ATP | 6006 | PECAM1<br>protein | gi 1113085<br>31                  | 82,597.50 | 100.00% | 8  | 11 | 20 | 0.21% | 10.60% | APVHFTI 2.48<br>EKFELNI<br>R               | 1,814.00 |
| ATP | 6006 | PECAM1<br>protein | gi 1113085<br>31                  | 82,597.50 | 100.00% | 8  | 11 | 20 | 0.21% | 10.60% | FHIIEG 2.56<br>K                           | 940.5252 |
| ATP | 6006 | PECAM1<br>protein | gi 1113085<br>31                  | 82,597.50 | 100.00% | 8  | 11 | 20 | 0.21% | 10.60% | GTETVY 2.85<br>SEIR                        | 1,154.57 |
| ATP | 6006 | PECAM1<br>protein | gi 1113085<br>31                  | 82,597.50 | 100.00% | 8  | 11 | 20 | 0.21% | 10.60% | KADPDF 2.22<br>VENRYS<br>R                 | 1,596.78 |
| ATP | 6006 | PECAM1<br>protein | gi 1113085<br>31                  | 82,597.50 | 100.00% | 8  | 11 | 20 | 0.21% | 10.60% | PAVPLL 2.6<br>NSNNEK                       | 1,295.70 |
| ATP | 6006 | PECAM1<br>protein | gi 1113085<br>31                  | 82,597.50 | 100.00% | 8  | 11 | 20 | 0.21% | 10.60% | QMPVE 3.32<br>MSRPAV<br>PLLNSN<br>NEK      | 2,270.13 |
| ATP | 6006 | PECAM1<br>protein | gi 1113085<br>31                  | 82,597.50 | 100.00% | 8  | 11 | 20 | 0.21% | 10.60% | RNTESY 3.69<br>LIPHVR                      | 1,484.80 |
| ATP | 6006 | vimentin          | gi 1103475<br>70                  | 53,710.80 | 100.00% | 28 | 37 | 49 | 0.52% | 48.90% | DGQVIN 2.55<br>ETSQHH<br>DDLE              | 1,836.80 |
| ATP | 6006 | vimentin          | gi 1103475<br>70                  | 53,710.80 | 100.00% | 28 | 37 | 49 | 0.52% | 48.90% | EEAESTL 2.92<br>QSFR                       | 1,296.61 |

|     |      |          |                  |           |         |    |    |    |       |        |                                                             |          |
|-----|------|----------|------------------|-----------|---------|----|----|----|-------|--------|-------------------------------------------------------------|----------|
| ATP | 6006 | vimentin | gi 1103475<br>70 | 53,710.80 | 100.00% | 28 | 37 | 49 | 0.52% | 48.90% | EAEESTL 3.44<br>QSFQRD<br>VDNASL<br>AR                      | 2,366.12 |
| ATP | 6006 | vimentin | gi 1103475<br>70 | 53,710.80 | 100.00% | 28 | 37 | 49 | 0.52% | 48.90% | ETNLDS 3.24<br>LPLVDT<br>HSK                                | 1,668.84 |
| ATP | 6006 | vimentin | gi 1103475<br>70 | 53,710.80 | 100.00% | 28 | 37 | 49 | 0.52% | 48.90% | ETNLDS 3.32<br>LPLVDT<br>HSKR                               | 1,824.95 |
| ATP | 6006 | vimentin | gi 1103475<br>70 | 53,710.80 | 100.00% | 28 | 37 | 49 | 0.52% | 48.90% | EYQDLL 2.15<br>NVK                                          | 1,121.58 |
| ATP | 6006 | vimentin | gi 1103475<br>70 | 53,710.80 | 100.00% | 28 | 37 | 49 | 0.52% | 48.90% | FADLSE 3.99<br>AANR                                         | 1,093.53 |
| ATP | 6006 | vimentin | gi 1103475<br>70 | 53,710.80 | 100.00% | 28 | 37 | 49 | 0.52% | 48.90% | FADLSE 3.45<br>AANRNN<br>DALR                               | 1,776.86 |
| ATP | 6006 | vimentin | gi 1103475<br>70 | 53,710.80 | 100.00% | 28 | 37 | 49 | 0.52% | 48.90% | FANYID 2.63<br>KVR                                          | 1,125.61 |
| ATP | 6006 | vimentin | gi 1103475<br>70 | 53,710.80 | 100.00% | 28 | 37 | 49 | 0.52% | 48.90% | HLREYQ 4.95<br>DLLNVK                                       | 1,527.83 |
| ATP | 6006 | vimentin | gi 1103475<br>70 | 53,710.80 | 100.00% | 28 | 37 | 49 | 0.52% | 48.90% | ILLAELE 3.48<br>QLK                                         | 1,169.71 |
| ATP | 6006 | vimentin | gi 1103475<br>70 | 53,710.80 | 100.00% | 28 | 37 | 49 | 0.52% | 48.90% | ILLAELE 4.36<br>QLKGQG<br>K                                 | 1,539.91 |
| ATP | 6006 | vimentin | gi 1103475<br>70 | 53,710.80 | 100.00% | 28 | 37 | 49 | 0.52% | 48.90% | ISLPLPN 4.99<br>FSSLNLR                                     | 1,570.90 |
| ATP | 6006 | vimentin | gi 1103475<br>70 | 53,710.80 | 100.00% | 28 | 37 | 49 | 0.52% | 48.90% | ISLPLPN 4.09<br>FSSLNLR<br>ETNLDS<br>LPLVDT<br>HSKR         | 3,376.82 |
| ATP | 6006 | vimentin | gi 1103475<br>70 | 53,710.80 | 100.00% | 28 | 37 | 49 | 0.52% | 48.90% | KLHDEEI 4.59<br>QELQAQI<br>QEQHVQ<br>IDMDVS<br>KPDLT<br>ALR | 4,085.06 |
| ATP | 6006 | vimentin | gi 1103475<br>70 | 53,710.80 | 100.00% | 28 | 37 | 49 | 0.52% | 48.90% | KVESLQ 4.56<br>EEIAFLK                                      | 1,533.85 |
| ATP | 6006 | vimentin | gi 1103475<br>70 | 53,710.80 | 100.00% | 28 | 37 | 49 | 0.52% | 48.90% | KVESLQ 4.81<br>EEIAFLK<br>K                                 | 1,661.95 |
| ATP | 6006 | vimentin | gi 1103475<br>70 | 53,710.80 | 100.00% | 28 | 37 | 49 | 0.52% | 48.90% | LHDEEIQ 3.33<br>ELQAQIQ<br>EQHVQI<br>DMDVSK<br>PDLTAA<br>LR | 3,956.97 |
| ATP | 6006 | vimentin | gi 1103475<br>70 | 53,710.80 | 100.00% | 28 | 37 | 49 | 0.52% | 48.90% | LQEEML 3.05<br>QREEAE<br>STLQSF                             | 2,340.11 |
| ATP | 6006 | vimentin | gi 1103475<br>70 | 53,710.80 | 100.00% | 28 | 37 | 49 | 0.52% | 48.90% | LQEEML 4.14<br>QREEAE<br>STLQSF<br>QVDNA<br>SLAR            | 3,409.63 |
| ATP | 6006 | vimentin | gi 1103475<br>70 | 53,710.80 | 100.00% | 28 | 37 | 49 | 0.52% | 48.90% | MALDIEI 2.54<br>ATYR                                        | 1,311.66 |
| ATP | 6006 | vimentin | gi 1103475<br>70 | 53,710.80 | 100.00% | 28 | 37 | 49 | 0.52% | 48.90% | TYTSSP 4.06<br>GGVYAT<br>R                                  | 1,472.74 |
| ATP | 6006 | vimentin | gi 1103475<br>70 | 53,710.80 | 100.00% | 28 | 37 | 49 | 0.52% | 48.90% | TNEKVE 4.31<br>LQELND<br>R                                  | 1,587.80 |

|     |      |                                                |                                                                  |           |         |    |    |    |       |        |                                              |      |          |
|-----|------|------------------------------------------------|------------------------------------------------------------------|-----------|---------|----|----|----|-------|--------|----------------------------------------------|------|----------|
| ATP | 6006 | vimentin                                       | gi 1103475<br>70                                                 | 53,710.80 | 100.00% | 28 | 37 | 49 | 0.52% | 48.90% | TNEKVE<br>LQELND<br>RFANYI<br>DK             | 3.72 | 2,439.22 |
| ATP | 6006 | vimentin                                       | gi 1103475<br>70                                                 | 53,710.80 | 100.00% | 28 | 37 | 49 | 0.52% | 48.90% | VELQEL<br>NDR                                | 3.27 | 1,115.57 |
| ATP | 6006 | vimentin                                       | gi 1103475<br>70                                                 | 53,710.80 | 100.00% | 28 | 37 | 49 | 0.52% | 48.90% | VESLQE<br>EIAFLK                             | 3.1  | 1,405.76 |
| ATP | 6006 | vimentin                                       | gi 1103475<br>70                                                 | 53,710.80 | 100.00% | 28 | 37 | 49 | 0.52% | 48.90% | VEVERD<br>NLAEDI<br>MR                       | 3.31 | 1,704.82 |
| ATP | 6006 | vimentin                                       | gi 1103475<br>70                                                 | 53,710.80 | 100.00% | 28 | 37 | 49 | 0.52% | 48.90% | VEVERD<br>NLAEDI<br>MRLR                     | 2.33 | 1,974.01 |
| ATP | 6006 | Leucine<br>rich<br>repeat<br>containin<br>g 59 | gi 1096593<br>25,gi 59857<br>957,gi 7507<br>0060,gi 777<br>36103 | 34,862.40 | 100.00% | 5  | 8  | 13 | 0.14% | 20.60% | DKLDGN<br>ELDLSLS<br>DLNEVP<br>VK            | 3.03 | 2,313.18 |
| ATP | 6006 | Leucine<br>rich<br>repeat<br>containin<br>g 59 | gi 1096593<br>25,gi 59857<br>957,gi 7507<br>0060,gi 777<br>36103 | 34,862.40 | 100.00% | 5  | 8  | 13 | 0.14% | 20.60% | DKLDGN<br>ELDLSLS<br>DLNEVP<br>VKELAA<br>LPK | 6.32 | 3,035.62 |
| ATP | 6006 | Leucine<br>rich<br>repeat<br>containin<br>g 59 | gi 1096593<br>25,gi 59857<br>957,gi 7507<br>0060,gi 777<br>36103 | 34,862.40 | 100.00% | 5  | 8  | 13 | 0.14% | 20.60% | LRQLPA<br>DFGR                               | 2.52 | 1,172.65 |
| ATP | 6006 | Leucine<br>rich<br>repeat<br>containin<br>g 59 | gi 1096593<br>25,gi 59857<br>957,gi 7507<br>0060,gi 777<br>36103 | 34,862.40 | 100.00% | 5  | 8  | 13 | 0.14% | 20.60% | LVNLQH<br>LDLLNN<br>R                        | 3.67 | 1,561.88 |
| ATP | 6006 | Leucine<br>rich<br>repeat<br>containin<br>g 59 | gi 1096593<br>25,gi 59857<br>957,gi 7507<br>0060,gi 777<br>36103 | 34,862.40 | 100.00% | 5  | 8  | 13 | 0.14% | 20.60% | LVTLPVS<br>FAQLK                             | 4.69 | 1,315.80 |
| ATP | 6006 | 17,000<br>dalton<br>myosin<br>light<br>chain   | gi 578,gi 74<br>268209                                           | 16,942.80 | 99.80%  | 2  | 2  | 2  | 0.02% | 19.20% | ALGQNP<br>TNAEVL<br>K                        | 3.09 | 1,354.73 |
| ATP | 6006 | 17,000<br>dalton<br>myosin<br>light<br>chain   | gi 578,gi 74<br>268209                                           | 16,942.80 | 99.80%  | 2  | 2  | 2  | 0.02% | 19.20% | VLDFEH<br>FLPMLQ<br>TVAK                     | 2.91 | 1,904.00 |

|     |      |                                                                                                                                                                                                                                                                                                                 |           |         |   |   |   |       |       |                              |          |
|-----|------|-----------------------------------------------------------------------------------------------------------------------------------------------------------------------------------------------------------------------------------------------------------------------------------------------------------------|-----------|---------|---|---|---|-------|-------|------------------------------|----------|
| ATP | 6006 | RecName gi 1221440<br>: 79,gi 14623<br>Full=Stre 1780,gi 735<br>ss-70 86960,gi 77<br>protein, 735995<br>mitochon<br>drial;<br>AltName:<br>Full=75<br>kDa<br>glucose-<br>regulated<br>protein;<br>AltName:<br>Full=GR<br>P 75;<br>AltName:<br>Full=Hea<br>t shock<br>70 kDa<br>protein 9;<br>Flags:<br>Precursor | 73,724.40 | 100.00% | 4 | 4 | 4 | 0.04% | 7.66% | DAGQIS 3.47<br>GLNVLR        | 1,242.68 |
| ATP | 6006 | RecName gi 1221440<br>: 79,gi 14623<br>Full=Stre 1780,gi 735<br>ss-70 86960,gi 77<br>protein, 735995<br>mitochon<br>drial;<br>AltName:<br>Full=75<br>kDa<br>glucose-<br>regulated<br>protein;<br>AltName:<br>Full=GR<br>P 75;<br>AltName:<br>Full=Hea<br>t shock<br>70 kDa<br>protein 9;<br>Flags:<br>Precursor | 73,724.40 | 100.00% | 4 | 4 | 4 | 0.04% | 7.66% | ETGVDL 2.59<br>TKDNMA<br>LQR | 1,706.84 |



|     |      |                                                                                                                                                                                                                                                           |                                                                   |           |         |   |    |    |       |        |                                                      |      |          |
|-----|------|-----------------------------------------------------------------------------------------------------------------------------------------------------------------------------------------------------------------------------------------------------------|-------------------------------------------------------------------|-----------|---------|---|----|----|-------|--------|------------------------------------------------------|------|----------|
| ATP | 6006 | RecName<br>:<br>Full=Stre<br>ss-70<br>protein,<br>mitochon<br>drial;<br>AltName:<br>Full=75<br>kDa<br>glucose-<br>regulated<br>protein;<br>AltName:<br>Full=GR<br>P 75;<br>AltName:<br>Full=Hea<br>t shock<br>70 kDa<br>protein 9;<br>Flags:<br>Precursor | gi 1221440<br>79,gi 14623<br>1780,gi 735<br>86960,gi 77<br>735995 | 73,724.40 | 100.00% | 4 | 4  | 4  | 0.04% | 7.66%  | TTPSVV<br>AFTADG<br>ER                               | 3.45 | 1,450.72 |
| ATP | 6006 | RecName<br>:<br>Full=Stre<br>ss-70<br>protein,<br>mitochon<br>drial;<br>AltName:<br>Full=75<br>kDa<br>glucose-<br>regulated<br>protein;<br>AltName:<br>Full=GR<br>P 75;<br>AltName:<br>Full=Hea<br>t shock<br>70 kDa<br>protein 9;<br>Flags:<br>Precursor | gi 1221440<br>79,gi 14623<br>1780,gi 735<br>86960,gi 77<br>735995 | 73,724.40 | 100.00% | 4 | 4  | 4  | 0.04% | 7.66%  | VQQTQVQ<br>DLFGR                                     | 2.86 | 1,290.68 |
| ATP | 6006 | RAB14<br>protein                                                                                                                                                                                                                                          | gi 1584550<br>25,gi 19553<br>9521                                 | 23,879.60 | 100.00% | 8 | 10 | 11 | 0.12% | 53.50% | ADLEAQ<br>RDVITYE<br>EAK                             | 2.84 | 1,737.83 |
| ATP | 6006 | RAB14<br>protein                                                                                                                                                                                                                                          | gi 1584550<br>25,gi 19553<br>9521                                 | 23,879.60 | 100.00% | 8 | 10 | 11 | 0.12% | 53.50% | ADLEAQ<br>RDVITYE<br>EAKQFA<br>EENGLL<br>FLEASA<br>K | 4.12 | 3,485.71 |
| ATP | 6006 | RAB14<br>protein                                                                                                                                                                                                                                          | gi 1584550<br>25,gi 19553<br>9521                                 | 23,879.60 | 100.00% | 8 | 10 | 11 | 0.12% | 53.50% | GAAGAL<br>MVYDIT<br>R                                | 2.98 | 1,353.68 |
| ATP | 6006 | RAB14<br>protein                                                                                                                                                                                                                                          | gi 1584550<br>25,gi 19553<br>9521                                 | 23,879.60 | 100.00% | 8 | 10 | 11 | 0.12% | 53.50% | IYQNIQD<br>GSLDLN<br>AAESGV<br>QHKPSA<br>PQGGR       | 4.46 | 3,150.56 |

|     |      |                                                                                                        |                                                                                                                                                                                       |           |         |   |    |    |       |        |                                                      |          |
|-----|------|--------------------------------------------------------------------------------------------------------|---------------------------------------------------------------------------------------------------------------------------------------------------------------------------------------|-----------|---------|---|----|----|-------|--------|------------------------------------------------------|----------|
| ATP | 6006 | RAB14 protein                                                                                          | gi 158455025,gi 195539521                                                                                                                                                             | 23,879.60 | 100.00% | 8 | 10 | 11 | 0.12% | 53.50% | KIYQNIQ 6.03<br>DGSLDL<br>NAAESG<br>VQHKPS<br>APQGGR | 3,278.65 |
| ATP | 6006 | RAB14 protein                                                                                          | gi 158455025,gi 195539521                                                                                                                                                             | 23,879.60 | 100.00% | 8 | 10 | 11 | 0.12% | 53.50% | NLTNPN 4.59<br>TVIILIGN<br>K                         | 1,623.94 |
| ATP | 6006 | RAB14 protein                                                                                          | gi 158455025,gi 195539521                                                                                                                                                             | 23,879.60 | 100.00% | 8 | 10 | 11 | 0.12% | 53.50% | TGENVE 2.17<br>DAFLEA<br>AK                          | 1,493.71 |
| ATP | 6006 | RAB14 protein                                                                                          | gi 158455025,gi 195539521                                                                                                                                                             | 23,879.60 | 100.00% | 8 | 10 | 11 | 0.12% | 53.50% | YIIGDM 3.01<br>GVGK                                  | 1,181.62 |
| ATP | 6006 | RAB2A, member RAS oncogene family                                                                      | gi 109939903,gi 116734835                                                                                                                                                             | 20,833.10 | 100.00% | 4 | 5  | 6  | 0.06% | 27.50% | EHGLIF 2.83<br>METSAM                                | 1,378.67 |
| ATP | 6006 | RAB2A, member RAS oncogene family                                                                      | gi 109939903,gi 116734835                                                                                                                                                             | 20,833.10 | 100.00% | 4 | 5  | 6  | 0.06% | 27.50% | FQPVHD 4.07<br>LTIGVEF<br>GAR                        | 1,785.93 |
| ATP | 6006 | RAB2A, member RAS oncogene family                                                                      | gi 109939903,gi 116734835                                                                                                                                                             | 20,833.10 | 100.00% | 4 | 5  | 6  | 0.06% | 27.50% | GAAGAL 2.76<br>LVYDITR                               | 1,319.73 |
| ATP | 6006 | RAB2A, member RAS oncogene family                                                                      | gi 109939903,gi 116734835                                                                                                                                                             | 20,833.10 | 100.00% | 4 | 5  | 6  | 0.06% | 27.50% | YIIGDT 2.24<br>GVGK                                  | 1,135.64 |
| ATP | 6006 | RAB5A, member RAS oncogene family                                                                      | gi 113911876,gi 115495947,gi 122144200                                                                                                                                                | 23,670.90 | 100.00% | 2 | 3  | 3  | 0.03% | 21.90% | GVDLTE 2.52<br>PTQPTR                                | 1,313.67 |
| ATP | 6006 | RAB5A, member RAS oncogene family                                                                      | gi 113911876,gi 115495947,gi 122144200                                                                                                                                                | 23,670.90 | 100.00% | 2 | 3  | 3  | 0.03% | 21.90% | LVLLGE 2.87<br>SAVGK                                 | 1,085.66 |
| ATP | 6006 | RAB5A, member RAS oncogene family                                                                      | gi 113911876,gi 115495947,gi 122144200                                                                                                                                                | 23,670.90 | 100.00% | 2 | 3  | 3  | 0.03% | 21.90% | TSMNVN 4.25<br>EIFMAIA<br>K                          | 1,584.78 |
| ATP | 6006 | RAB5A, member RAS oncogene family                                                                      | gi 113911876,gi 115495947,gi 122144200                                                                                                                                                | 23,670.90 | 100.00% | 2 | 3  | 3  | 0.03% | 21.90% | YHSLAP 2.55<br>MYRR                                  | 1,316.61 |
| ATP | 6006 | Chain R, Cadmium Ion Binding Structure Of Bovine Heart Cytochrome C Oxidase In The Fully Reduced State | gi 149241523,gi 149241540,gi 149241553,gi 149241570,gi 149241583,gi 149241600,gi 149241613,gi 149241625,gi 149241638,gi 149241650,gi 149241663,gi 149241675,gi 149241688,gi 149241700 | 16,717.40 | 99.80%  | 2 | 3  | 4  | 0.04% | 29.60% | EIYPYVI 2.5<br>QELRPTL<br>NELGIST<br>PEELGL<br>DKV   | 3,428.82 |

|     |      |                                                                                                                                                                                                                                                                                                          |           |        |   |   |   |       |        |                                       |          |
|-----|------|----------------------------------------------------------------------------------------------------------------------------------------------------------------------------------------------------------------------------------------------------------------------------------------------------------|-----------|--------|---|---|---|-------|--------|---------------------------------------|----------|
| ATP | 6006 | Chain R, gi 1492415<br>Cadmium 23,gi 14924<br>Ion 1540,gi 149<br>Binding 241553,gi 1<br>Structure 49241570,g<br>Of i 14924158<br>Bovine 3,gi 149241<br>Heart 600,gi 1492<br>Cytochro 41613,gi 42<br>me C 564216,gi 5<br>Oxidase 0872151,gi <br>In The 60391934,g<br>Fully i 81674705<br>Reduced<br>State | 16,717.40 | 99.80% | 2 | 3 | 4 | 0.04% | 29.60% | GMNTLV 4.11<br>GYDLVP<br>EPK          | 1,648.83 |
| ATP | 6006 | apolipoprotein E gi 1102254<br>17,gi 15727<br>9088,gi 278<br>06739,gi 31<br>2893,gi 416<br>629,gi 5985<br>8471,gi 743<br>55004,gi 81                                                                                                                                                                     | 35,961.60 | 99.80% | 2 | 2 | 2 | 0.02% | 10.80% | AYKEEL 4.72<br>EGQLGP<br>MAQETQ<br>AR | 2,265.08 |
| ATP | 6006 | apolipoprotein E gi 1102254<br>17,gi 15727<br>9088,gi 278<br>06739,gi 31<br>2893,gi 416<br>629,gi 5985<br>8471,gi 743<br>55004,gi 81                                                                                                                                                                     | 35,961.60 | 99.80% | 2 | 2 | 2 | 0.02% | 10.80% | LAVYQA 3.11<br>GASEGA<br>ER           | 1,421.70 |
| ATP | 6006 | RecName gi 1221404<br>:<br>Full=Vesicle-associate<br>d<br>membrane protein<br>8;<br>Short=VAMP-8                                                                                                                                                                                                         | 11,339.40 | 99.80% | 2 | 2 | 2 | 0.02% | 33.00% | NKTEDL 4.92<br>EATSEHF<br>K           | 1,648.78 |
| ATP | 6006 | RecName gi 1221404<br>:<br>Full=Vesicle-associate<br>d<br>membrane protein<br>8;<br>Short=VAMP-8                                                                                                                                                                                                         | 11,339.40 | 99.80% | 2 | 2 | 2 | 0.02% | 33.00% | NLRDEV 3.21<br>EGVKNI<br>MTQNV<br>R   | 2,260.14 |
| ATP | 6006 | ANXA11 protein gi 1113069<br>40,gi 11396<br>9,gi 162674<br>,gi 2780622<br>1,gi 78                                                                                                                                                                                                                        | 54,002.00 | 99.80% | 2 | 2 | 2 | 0.02% | 8.75%  | GTITDAS 2.78<br>GFDPLR<br>DAEVL       | 2,033.03 |
| ATP | 6006 | ANXA11 protein gi 1113069<br>40,gi 11396<br>9,gi 162674<br>,gi 2780622<br>1,gi 78                                                                                                                                                                                                                        | 54,002.00 | 99.80% | 2 | 2 | 2 | 0.02% | 8.75%  | SEIDLLD 2.95<br>IR                    | 1,073.58 |
| ATP | 6006 | ANXA11 protein gi 1113069<br>40,gi 11396<br>9,gi 162674<br>,gi 2780622<br>1,gi 78                                                                                                                                                                                                                        | 54,002.00 | 99.80% | 2 | 2 | 2 | 0.02% | 8.75%  | SLYHDIT 3.98<br>GDTSGD<br>YRK         | 1,827.85 |

|     |      |                                                                                                                                                                                                                                                                                                                                                                             |           |         |   |   |   |       |        |                                           |          |
|-----|------|-----------------------------------------------------------------------------------------------------------------------------------------------------------------------------------------------------------------------------------------------------------------------------------------------------------------------------------------------------------------------------|-----------|---------|---|---|---|-------|--------|-------------------------------------------|----------|
| ATP | 6006 | RecName gi 1185973 : 73,gi 26418<br>Full=Ann 2,gi 615530<br>exin A1; 85,gi 73587<br>AltName: 269,gi 7385<br>Full=Ann 3762,gi 74<br>exin-1;<br>AltName:<br>Full=Ann<br>exin I;<br>AltName:<br>Full=Lip<br>ocortin I;<br>AltName:<br>Full=Cal<br>pactin II;<br>AltName:<br>Full=Chr<br>omobindi<br>n-9;<br>AltName:<br>Full=p35;<br>AltName:<br>Full=Pho<br>spholipas<br>e A2 | 38,935.40 | 100.00% | 3 | 3 | 3 | 0.03% | 17.10% | GDRSEE 5.37<br>LAVNDD<br>LADSDA<br>R      | 2,047.92 |
| ATP | 6006 | RecName gi 1185973 : 73,gi 26418<br>Full=Ann 2,gi 615530<br>exin A1; 85,gi 73587<br>AltName: 269,gi 7385<br>Full=Ann 3762,gi 74<br>exin-1;<br>AltName:<br>Full=Ann<br>exin I;<br>AltName:<br>Full=Lip<br>ocortin I;<br>AltName:<br>Full=Cal<br>pactin II;<br>AltName:<br>Full=Chr<br>omobindi<br>n-9;<br>AltName:<br>Full=p35;<br>AltName:<br>Full=Pho<br>spholipas<br>e A2 | 38,935.40 | 100.00% | 3 | 3 | 3 | 0.03% | 17.10% | GGPGSA 2.85<br>VSPYPTF<br>NPSSDV<br>EALHK | 2,414.16 |

|     |      |                                                                                                                                                                                                                                                                                                                                                                                |            |         |   |   |   |       |        |                                      |          |
|-----|------|--------------------------------------------------------------------------------------------------------------------------------------------------------------------------------------------------------------------------------------------------------------------------------------------------------------------------------------------------------------------------------|------------|---------|---|---|---|-------|--------|--------------------------------------|----------|
| ATP | 6006 | RecName gi 1185973 :<br>73,gi 26418<br>Full=Ann 2,gi 615530<br>exin A1; 85,gi 73587<br>AltName: 269,gi 7385<br>Full=Ann 3762,gi 74<br>exin-1;<br>AltName:<br>Full=Ann<br>exin I;<br>AltName:<br>Full=Lip<br>ocortin I;<br>AltName:<br>Full=Cal<br>pactin II;<br>AltName:<br>Full=Chr<br>omobindi<br>n-9;<br>AltName:<br>Full=p35;<br>AltName:<br>Full=Pho<br>spholipas<br>e A2 | 38,935.40  | 100.00% | 3 | 3 | 3 | 0.03% | 17.10% | GLGTDE 3.5<br>DTLNEIL<br>ASR         | 1,703.84 |
| ATP | 6006 | LRRRC8C gi 1487452<br>protein 86,gi 14964<br>2813                                                                                                                                                                                                                                                                                                                              | 92,305.20  | 100.00% | 6 | 7 | 8 | 0.08% | 10.10% | IHSAALS 2.48<br>FLKENL<br>K          | 1,570.90 |
| ATP | 6006 | LRRRC8C gi 1487452<br>protein 86,gi 14964<br>2813                                                                                                                                                                                                                                                                                                                              | 92,305.20  | 100.00% | 6 | 7 | 8 | 0.08% | 10.10% | IPQAVV 3.25<br>DVSSHL<br>QK          | 1,520.84 |
| ATP | 6006 | LRRRC8C gi 1487452<br>protein 86,gi 14964<br>2813                                                                                                                                                                                                                                                                                                                              | 92,305.20  | 100.00% | 6 | 7 | 8 | 0.08% | 10.10% | QETGID 2.31<br>DIPDVK                | 1,329.65 |
| ATP | 6006 | LRRRC8C gi 1487452<br>protein 86,gi 14964<br>2813                                                                                                                                                                                                                                                                                                                              | 92,305.20  | 100.00% | 6 | 7 | 8 | 0.08% | 10.10% | SIEEIVSF 3.53<br>QHLR                | 1,457.77 |
| ATP | 6006 | LRRRC8C gi 1487452<br>protein 86,gi 14964<br>2813                                                                                                                                                                                                                                                                                                                              | 92,305.20  | 100.00% | 6 | 7 | 8 | 0.08% | 10.10% | SNTTQS 3.49<br>GPEGSL<br>VNSQSL<br>K | 1,933.95 |
| ATP | 6006 | LRRRC8C gi 1487452<br>protein 86,gi 14964<br>2813                                                                                                                                                                                                                                                                                                                              | 92,305.20  | 100.00% | 6 | 7 | 8 | 0.08% | 10.10% | YLDLSY 2.45<br>NDR                   | 1,271.63 |
| ATP | 6006 | PREDIC gi 1199117<br>TED: 77<br>similar to<br>MYB<br>binding<br>protein<br>1a                                                                                                                                                                                                                                                                                                  | 151,796.60 | 100.00% | 2 | 2 | 2 | 0.02% | 1.85%  | DLAAL 2.39<br>LLNTLFR                | 1,488.84 |
| ATP | 6006 | PREDIC gi 1199117<br>TED: 77<br>similar to<br>MYB<br>binding<br>protein<br>1a                                                                                                                                                                                                                                                                                                  | 151,796.60 | 100.00% | 2 | 2 | 2 | 0.02% | 1.85%  | TAGDRV 2.88<br>ETLYAR                | 1,351.70 |
| ATP | 6006 | Chain A, gi 1105908<br>Structure 46,gi 11059<br>Of 0847,gi 124<br>Mammali 056491,gi 8<br>an C3 3764016,gi <br>With An 86438252,g<br>Intact i 99028969<br>Thioester<br>At 3a<br>Resolutio<br>n                                                                                                                                                                                  | 187,214.10 | 99.80%  | 2 | 2 | 2 | 0.02% | 2.05%  | LYNVEA 2.91<br>TSYALL<br>ALLAR       | 1,881.05 |

|     |      |                                                                                                                                                        |                                                                            |            |         |   |   |   |       |       |                                |          |
|-----|------|--------------------------------------------------------------------------------------------------------------------------------------------------------|----------------------------------------------------------------------------|------------|---------|---|---|---|-------|-------|--------------------------------|----------|
| ATP | 6006 | Chain A, Structure Of Mammalian C3 With An Intact Thioester At 3a Resolution                                                                           | gi 110590846,gi 110590847,gi 124056491,gi 83764016,gi 86438252,gi 99028969 | 187,214.10 | 99.80%  | 2 | 2 | 2 | 0.02% | 2.05% | RPYTVAI 5.47<br>AAYALA<br>LLGK | 1,791.05 |
| ATP | 6006 | MGAT1 protein                                                                                                                                          | gi 154426138,gi 59858237,gi 62751783                                       | 51,684.70  | 100.00% | 3 | 3 | 3 | 0.03% | 8.05% | GIVSFLY 2.68<br>R              | 954.5407 |
| ATP | 6006 | MGAT1 protein                                                                                                                                          | gi 154426138,gi 59858237,gi 62751783                                       | 51,684.70  | 100.00% | 3 | 3 | 3 | 0.03% | 8.05% | LNQHFV 4.31<br>PFTQLDL<br>SYLR | 2,091.10 |
| ATP | 6006 | MGAT1 protein                                                                                                                                          | gi 154426138,gi 59858237,gi 62751783                                       | 51,684.70  | 100.00% | 3 | 3 | 3 | 0.03% | 8.05% | VYGAPL 2.35<br>LQVEK           | 1,216.69 |
| ATP | 6006 | PREDICTED: similar to Thioredoxin domain-containing protein 5 precursor (Thioredoxin-like protein p46) (Endoplasmic reticulum protein ERp46) isoform 1 | gi 119915902                                                               | 45,792.10  | 99.80%  | 2 | 2 | 2 | 0.02% | 4.55% | FFKPGQ 2.86<br>EAVK            | 1,150.63 |
| ATP | 6006 | PREDICTED: similar to Thioredoxin domain-containing protein 5 precursor (Thioredoxin-like protein p46) (Endoplasmic reticulum protein ERp46) isoform 1 | gi 119915902                                                               | 45,792.10  | 99.80%  | 2 | 2 | 2 | 0.02% | 4.55% | GYPTLL 2.03<br>LFR             | 1,079.62 |







|     |      |                                                                                                                                                                                                                                             |                                                  |           |         |   |   |    |       |        |                                           |          |
|-----|------|---------------------------------------------------------------------------------------------------------------------------------------------------------------------------------------------------------------------------------------------|--------------------------------------------------|-----------|---------|---|---|----|-------|--------|-------------------------------------------|----------|
| ATP | 6006 | RecName<br>:<br>Full=Tra<br>nslocon-<br>associate<br>d protein<br>subunit<br>delta;<br>Short=T<br>RAP-<br>delta;<br>AltName:<br>Full=Sig<br>nal<br>sequence<br>receptor<br>subunit<br>delta;<br>Short=SS<br>R-delta;<br>Flags:<br>Precursor | gi 1221371<br>13,gi 83638<br>548,gi 8437<br>0035 | 18,796.20 | 100.00% | 6 | 9 | 13 | 0.14% | 29.70% | VQNMAL 4.34<br>YADVSG<br>K                | 1,411.69 |
| ATP | 6006 | RecName<br>:<br>Full=Tra<br>nslocon-<br>associate<br>d protein<br>subunit<br>delta;<br>Short=T<br>RAP-<br>delta;<br>AltName:<br>Full=Sig<br>nal<br>sequence<br>receptor<br>subunit<br>delta;<br>Short=SS<br>R-delta;<br>Flags:<br>Precursor | gi 1221371<br>13,gi 83638<br>548,gi 8437<br>0035 | 18,796.20 | 100.00% | 6 | 9 | 13 | 0.14% | 29.70% | VQNMAL 3.5<br>YADVSG<br>KQFPVT<br>R       | 2,140.09 |
| ATP | 6006 | Transloca<br>se of<br>outer<br>mitochon<br>drial<br>membran<br>e 70<br>homolog<br>A (S.<br>cerevisiae<br>)                                                                                                                                  | gi 1153050<br>42,gi 11549<br>6634                | 67,553.40 | 100.00% | 3 | 4 | 4  | 0.04% | 7.72%  | ASPAPGS 3.26<br>GHPDGP<br>GTHLEM<br>NSLDR | 2,416.10 |

|     |      |                                                                          |                                      |           |         |   |   |   |       |        |                                  |      |          |
|-----|------|--------------------------------------------------------------------------|--------------------------------------|-----------|---------|---|---|---|-------|--------|----------------------------------|------|----------|
| ATP | 6006 | Translocase of outer mitochondrial membrane 70 homolog A (S. cerevisiae) | gi 115305042,gi 115496634            | 67,553.40 | 100.00% | 3 | 4 | 4 | 0.04% | 7.72%  | LRPESAL<br>AQAQK                 | 3.56 | 1,311.74 |
| ATP | 6006 | Translocase of outer mitochondrial membrane 70 homolog A (S. cerevisiae) | gi 115305042,gi 115496634            | 67,553.40 | 100.00% | 3 | 4 | 4 | 0.04% | 7.72%  | NVDLST<br>FYQNR                  | 3.15 | 1,356.65 |
| ATP | 6006 | lysosomal-associated membrane protein 2 isoform 1                        | gi 164420738,gi 74353978,gi 77736087 | 44,524.90 | 100.00% | 3 | 4 | 7 | 0.07% | 5.16%  | IPLNDIF<br>R                     | 3.07 | 987.5623 |
| ATP | 6006 | lysosomal-associated membrane protein 2 isoform 1                        | gi 164420738,gi 74353978,gi 77736087 | 44,524.90 | 100.00% | 3 | 4 | 7 | 0.07% | 5.16%  | VALKIPL<br>NDIFR                 | 3.91 | 1,398.85 |
| ATP | 6006 | lysosomal-associated membrane protein 2 isoform 1                        | gi 164420738,gi 74353978,gi 77736087 | 44,524.90 | 100.00% | 3 | 4 | 7 | 0.07% | 5.16%  | YLDFVF<br>AVK                    | 2.38 | 1,101.60 |
| ATP | 6006 | Nicastrin 1                                                              | gi 74267600,gi 77735901              | 79,055.00 | 99.80%  | 2 | 2 | 3 | 0.03% | 3.63%  | ALAGVA<br>TVLAR                  | 3.21 | 1,041.64 |
| ATP | 6006 | Nicastrin 1                                                              | gi 74267600,gi 77735901              | 79,055.00 | 99.80%  | 2 | 2 | 3 | 0.03% | 3.63%  | MATAGG<br>GCVADP<br>GSR          | 3.32 | 1,349.59 |
| ATP | 6006 | PGRMC2 protein 2895                                                      | gi 148744919,gi 149642895            | 23,693.20 | 100.00% | 4 | 4 | 9 | 0.09% | 18.80% | DFSLEQL<br>R                     | 2.4  | 1,007.52 |
| ATP | 6006 | PGRMC2 protein 2895                                                      | gi 148744919,gi 149642895            | 23,693.20 | 100.00% | 4 | 4 | 9 | 0.09% | 18.80% | FYGPAG<br>PYGIFAG<br>R           | 3.04 | 1,472.73 |
| ATP | 6006 | PGRMC2 protein 2895                                                      | gi 148744919,gi 149642895            | 23,693.20 | 100.00% | 4 | 4 | 9 | 0.09% | 18.80% | GLGAGA<br>GAGEES<br>PAASLPR      | 4.48 | 1,667.83 |
| ATP | 6006 | PGRMC2 protein 2895                                                      | gi 148744919,gi 149642895            | 23,693.20 | 100.00% | 4 | 4 | 9 | 0.09% | 18.80% | RGLGAG<br>AGAGEE<br>SPAASLP<br>R | 4.18 | 1,823.94 |

|     |      |                                                   |            |            |         |    |    |    |       |        |                                               |      |          |
|-----|------|---------------------------------------------------|------------|------------|---------|----|----|----|-------|--------|-----------------------------------------------|------|----------|
| ATP | 6006 | PREDIC TED: 41<br>similar to myoferlin isoform 12 | gi 1946789 | 234,648.00 | 100.00% | 29 | 35 | 39 | 0.41% | 20.30% | DQLKPT<br>QLLQNV<br>AR                        | 3.59 | 1,623.92 |
| ATP | 6006 | PREDIC TED: 41<br>similar to myoferlin isoform 12 | gi 1946789 | 234,648.00 | 100.00% | 29 | 35 | 39 | 0.41% | 20.30% | EYTGFP<br>DPYDEL<br>NSGKGE<br>GVAYR           | 2.18 | 2,564.16 |
| ATP | 6006 | PREDIC TED: 41<br>similar to myoferlin isoform 12 | gi 1946789 | 234,648.00 | 100.00% | 29 | 35 | 39 | 0.41% | 20.30% | FKGFPPP<br>VLSEDG<br>SSIR                     | 4.81 | 1,832.95 |
| ATP | 6006 | PREDIC TED: 41<br>similar to myoferlin isoform 12 | gi 1946789 | 234,648.00 | 100.00% | 29 | 35 | 39 | 0.41% | 20.30% | GNNPFF<br>DELFFY<br>NVHLTP<br>SELMDEI<br>ISIR | 4.3  | 3,473.67 |
| ATP | 6006 | PREDIC TED: 41<br>similar to myoferlin isoform 12 | gi 1946789 | 234,648.00 | 100.00% | 29 | 35 | 39 | 0.41% | 20.30% | HKDGSN<br>LPILPSQ<br>R                        | 2.91 | 1,561.84 |
| ATP | 6006 | PREDIC TED: 41<br>similar to myoferlin isoform 12 | gi 1946789 | 234,648.00 | 100.00% | 29 | 35 | 39 | 0.41% | 20.30% | ILHQHLG<br>PPEER                              | 3.71 | 1,425.76 |
| ATP | 6006 | PREDIC TED: 41<br>similar to myoferlin isoform 12 | gi 1946789 | 234,648.00 | 100.00% | 29 | 35 | 39 | 0.41% | 20.30% | ILVELST<br>LLEK                               | 3.56 | 1,257.77 |
| ATP | 6006 | PREDIC TED: 41<br>similar to myoferlin isoform 12 | gi 1946789 | 234,648.00 | 100.00% | 29 | 35 | 39 | 0.41% | 20.30% | IPAHQVL<br>YSTSGG<br>DASGK                    | 3.94 | 1,787.89 |
| ATP | 6006 | PREDIC TED: 41<br>similar to myoferlin isoform 12 | gi 1946789 | 234,648.00 | 100.00% | 29 | 35 | 39 | 0.41% | 20.30% | ISVYDY<br>DTFTR                               | 3.13 | 1,379.65 |
| ATP | 6006 | PREDIC TED: 41<br>similar to myoferlin isoform 12 | gi 1946789 | 234,648.00 | 100.00% | 29 | 35 | 39 | 0.41% | 20.30% | ISVYDY<br>DTFTRD<br>EK                        | 2.46 | 1,751.81 |
| ATP | 6006 | PREDIC TED: 41<br>similar to myoferlin isoform 12 | gi 1946789 | 234,648.00 | 100.00% | 29 | 35 | 39 | 0.41% | 20.30% | ISVYDY<br>DTFTRD<br>EKVGETI<br>IDLENR         | 2.6  | 2,991.46 |

|     |      |                                                   |            |            |         |    |    |    |       |        |                                          |          |
|-----|------|---------------------------------------------------|------------|------------|---------|----|----|----|-------|--------|------------------------------------------|----------|
| ATP | 6006 | PREDIC TED: 41<br>similar to myoferlin isoform 12 | gi 1946789 | 234,648.00 | 100.00% | 29 | 35 | 39 | 0.41% | 20.30% | IYRAEDI 3.04<br>PQMDDA<br>FSQTVK         | 2,243.07 |
| ATP | 6006 | PREDIC TED: 41<br>similar to myoferlin isoform 12 | gi 1946789 | 234,648.00 | 100.00% | 29 | 35 | 39 | 0.41% | 20.30% | LQSNIEA 2.7<br>LK                        | 1,015.58 |
| ATP | 6006 | PREDIC TED: 41<br>similar to myoferlin isoform 12 | gi 1946789 | 234,648.00 | 100.00% | 29 | 35 | 39 | 0.41% | 20.30% | NDVVGT 3.26<br>TYLHLS<br>K               | 1,446.76 |
| ATP | 6006 | PREDIC TED: 41<br>similar to myoferlin isoform 12 | gi 1946789 | 234,648.00 | 100.00% | 29 | 35 | 39 | 0.41% | 20.30% | NLGPPG 3.02<br>PPFNITP<br>R              | 1,476.80 |
| ATP | 6006 | PREDIC TED: 41<br>similar to myoferlin isoform 12 | gi 1946789 | 234,648.00 | 100.00% | 29 | 35 | 39 | 0.41% | 20.30% | NLMALD 3.31<br>KDSFSD<br>PYAHVS<br>FLHR  | 2,579.23 |
| ATP | 6006 | PREDIC TED: 41<br>similar to myoferlin isoform 12 | gi 1946789 | 234,648.00 | 100.00% | 29 | 35 | 39 | 0.41% | 20.30% | NLVDPF 3.53<br>VEVSFA<br>GK              | 1,521.79 |
| ATP | 6006 | PREDIC TED: 41<br>similar to myoferlin isoform 12 | gi 1946789 | 234,648.00 | 100.00% | 29 | 35 | 39 | 0.41% | 20.30% | SDENED 3.4<br>PSVVGE<br>FK               | 1,551.68 |
| ATP | 6006 | PREDIC TED: 41<br>similar to myoferlin isoform 12 | gi 1946789 | 234,648.00 | 100.00% | 29 | 35 | 39 | 0.41% | 20.30% | SLLTEA 4.32<br>DAGHTE<br>FTDEVY<br>QNESR | 2,612.17 |
| ATP | 6006 | PREDIC TED: 41<br>similar to myoferlin isoform 12 | gi 1946789 | 234,648.00 | 100.00% | 29 | 35 | 39 | 0.41% | 20.30% | SRALSQI 2.4<br>HEAAVR                    | 1,437.79 |
| ATP | 6006 | PREDIC TED: 41<br>similar to myoferlin isoform 12 | gi 1946789 | 234,648.00 | 100.00% | 29 | 35 | 39 | 0.41% | 20.30% | TLHSSFQ 3.55<br>PNISQGR                  | 1,571.79 |
| ATP | 6006 | PREDIC TED: 41<br>similar to myoferlin isoform 12 | gi 1946789 | 234,648.00 | 100.00% | 29 | 35 | 39 | 0.41% | 20.30% | TQGLVP 2.51<br>EHVETR                    | 1,365.71 |

|     |      |                                                   |                                                 |            |         |    |    |    |       |        |                                       |          |
|-----|------|---------------------------------------------------|-------------------------------------------------|------------|---------|----|----|----|-------|--------|---------------------------------------|----------|
| ATP | 6006 | PREDIC TED: 41<br>similar to myoferlin isoform 12 | gi 1946789                                      | 234,648.00 | 100.00% | 29 | 35 | 39 | 0.41% | 20.30% | VENTLE 2.14<br>VLNEK                  | 1,320.67 |
| ATP | 6006 | PREDIC TED: 41<br>similar to myoferlin isoform 12 | gi 1946789                                      | 234,648.00 | 100.00% | 29 | 35 | 39 | 0.41% | 20.30% | VENTLE 2.87<br>VLNEKE<br>ADERPA<br>GK | 2,274.13 |
| ATP | 6006 | PREDIC TED: 41<br>similar to myoferlin isoform 12 | gi 1946789                                      | 234,648.00 | 100.00% | 29 | 35 | 39 | 0.41% | 20.30% | VFLPKEE 3.71<br>LYMPPL<br>VIK         | 1,932.09 |
| ATP | 6006 | PREDIC TED: 41<br>similar to myoferlin isoform 12 | gi 1946789                                      | 234,648.00 | 100.00% | 29 | 35 | 39 | 0.41% | 20.30% | VGETIID 2.32<br>LENRFLS<br>R          | 1,761.95 |
| ATP | 6006 | PREDIC TED: 41<br>similar to myoferlin isoform 12 | gi 1946789                                      | 234,648.00 | 100.00% | 29 | 35 | 39 | 0.41% | 20.30% | VIEDRD 4.35<br>NYIPNTL<br>NPVFGR      | 2,232.14 |
| ATP | 6006 | PREDIC TED: 41<br>similar to myoferlin isoform 12 | gi 1946789                                      | 234,648.00 | 100.00% | 29 | 35 | 39 | 0.41% | 20.30% | VIELFD 2.96<br>NDQVGK<br>DEFLGR       | 2,207.13 |
| ATP | 6006 | PREDIC TED: 41<br>similar to myoferlin isoform 12 | gi 1946789                                      | 234,648.00 | 100.00% | 29 | 35 | 39 | 0.41% | 20.30% | VIVESAS 2.93<br>NIPK                  | 1,156.66 |
| ATP | 6006 | TXNDC1 3 protein                                  | gi 1488784<br>48,gi 14964<br>2897               | 38,865.40  | 100.00% | 3  | 3  | 3  | 0.03% | 12.10% | FFVTTL 2.62<br>AFFHAK                 | 1,525.82 |
| ATP | 6006 | TXNDC1 3 protein                                  | gi 1488784<br>48,gi 14964<br>2897               | 38,865.40  | 100.00% | 3  | 3  | 3  | 0.03% | 12.10% | VDVIQEP 3.2<br>GLSGR                  | 1,269.68 |
| ATP | 6006 | TXNDC1 3 protein                                  | gi 1488784<br>48,gi 14964<br>2897               | 38,865.40  | 100.00% | 3  | 3  | 3  | 0.03% | 12.10% | YRPGV 2.81<br>YEDLQN<br>YILEK         | 2,057.03 |
| ATP | 6006 | OCIA domain containin g 1                         | gi 5985850<br>9,gi 627518<br>43,gi 75040<br>205 | 27,811.90  | 100.00% | 3  | 3  | 3  | 0.03% | 17.80% | FKNLEN 3.23<br>SPLGEAL<br>R           | 1,587.85 |
| ATP | 6006 | OCIA domain containin g 1                         | gi 5985850<br>9,gi 627518<br>43,gi 75040<br>205 | 27,811.90  | 100.00% | 3  | 3  | 3  | 0.03% | 17.80% | NRESYE 3.15<br>VTLTHK                 | 1,476.74 |
| ATP | 6006 | OCIA domain containin g 1                         | gi 5985850<br>9,gi 627518<br>43,gi 75040<br>205 | 27,811.90  | 100.00% | 3  | 3  | 3  | 0.03% | 17.80% | SVPLAA 2.81<br>TSMLITQ<br>GLISK       | 1,846.04 |

|     |      |                                                                                                           |                                                                 |           |         |    |    |    |       |        |                                     |      |          |
|-----|------|-----------------------------------------------------------------------------------------------------------|-----------------------------------------------------------------|-----------|---------|----|----|----|-------|--------|-------------------------------------|------|----------|
| ATP | 6006 | RecName<br>:<br>Full=Het<br>erogeneo<br>us<br>nuclear<br>ribonucle<br>oprotein<br>K;<br>Short=hn<br>RNP K | gi 1088607<br>77.gi 74354<br>615.gi 7773<br>6071                | 51,003.40 | 100.00% | 3  | 3  | 3  | 0.03% | 10.80% | GSYGDL<br>GGPIIT<br>QVTIPK          | 4.06 | 1,917.03 |
| ATP | 6006 | RecName<br>:<br>Full=Het<br>erogeneo<br>us<br>nuclear<br>ribonucle<br>oprotein<br>K;<br>Short=hn<br>RNP K | gi 1088607<br>77.gi 74354<br>615.gi 7773<br>6071                | 51,003.40 | 100.00% | 3  | 3  | 3  | 0.03% | 10.80% | IILDLISE<br>SPIKGR                  | 2.84 | 1,553.93 |
| ATP | 6006 | RecName<br>:<br>Full=Het<br>erogeneo<br>us<br>nuclear<br>ribonucle<br>oprotein<br>K;<br>Short=hn<br>RNP K | gi 1088607<br>77.gi 74354<br>615.gi 7773<br>6071                | 51,003.40 | 100.00% | 3  | 3  | 3  | 0.03% | 10.80% | TDYNAS<br>VSVPS<br>SGPER            | 3.54 | 1,780.80 |
| ATP | 6006 | myristoyl<br>ated<br>alanine-<br>rich<br>protein<br>kinase C<br>substrate                                 | gi 1154954<br>97.gi 14887<br>2484.gi 163<br>340.gi 9453<br>4743 | 31,960.80 | 99.80%  | 2  | 2  | 2  | 0.02% | 6.87%  | GEATAE<br>RPGEAA<br>VASSPS<br>K     | 4.04 | 1,814.89 |
| ATP | 6006 | myristoyl<br>ated<br>alanine-<br>rich<br>protein<br>kinase C<br>substrate                                 | gi 1154954<br>97.gi 14887<br>2484.gi 163<br>340.gi 9453<br>4743 | 31,960.80 | 99.80%  | 2  | 2  | 2  | 0.02% | 6.87%  | TAAKGE<br>ATAERP<br>GEAAVA<br>SSPSK | 4.12 | 2,186.10 |
| ATP | 6006 | vascular<br>endotheli<br>al<br>cadherin<br>precursor                                                      | gi 3430529<br>9.gi 486753<br>81.gi 75071<br>940                 | 87,450.60 | 100.00% | 10 | 13 | 16 | 0.17% | 11.40% | KPLIGSV<br>LAK                      | 2.27 | 1,025.67 |
| ATP | 6006 | vascular<br>endotheli<br>al<br>cadherin<br>precursor                                                      | gi 3430529<br>9.gi 486753<br>81.gi 75071<br>940                 | 87,450.60 | 100.00% | 10 | 13 | 16 | 0.17% | 11.40% | NLESPSS<br>FTIK                     | 2.37 | 1,222.63 |
| ATP | 6006 | vascular<br>endotheli<br>al<br>cadherin<br>precursor                                                      | gi 3430529<br>9.gi 486753<br>81.gi 75071<br>940                 | 87,450.60 | 100.00% | 10 | 13 | 16 | 0.17% | 11.40% | RTSDKG<br>QFFGITK                   | 2.57 | 1,484.79 |

|     |      |                                         |                                                               |           |         |    |    |    |       |        |                                    |      |          |
|-----|------|-----------------------------------------|---------------------------------------------------------------|-----------|---------|----|----|----|-------|--------|------------------------------------|------|----------|
| ATP | 6006 | vascular endothelial cadherin precursor | gi 34305299,gi 48675381,gi 75071940                           | 87,450.60 | 100.00% | 10 | 13 | 16 | 0.17% | 11.40% | TSDKGQ FFGITK                      | 2.83 | 1,328.68 |
| ATP | 6006 | vascular endothelial cadherin precursor | gi 34305299,gi 48675381,gi 75071940                           | 87,450.60 | 100.00% | 10 | 13 | 16 | 0.17% | 11.40% | VDKNTG DVYALER                     | 3.97 | 1,479.74 |
| ATP | 6006 | vascular endothelial cadherin precursor | gi 34305299,gi 48675381,gi 75071940                           | 87,450.60 | 100.00% | 10 | 13 | 16 | 0.17% | 11.40% | VFRVDK NTGADVYALER                 | 2.45 | 1,881.98 |
| ATP | 6006 | vascular endothelial cadherin precursor | gi 34305299,gi 48675381,gi 75071940                           | 87,450.60 | 100.00% | 10 | 13 | 16 | 0.17% | 11.40% | VGSPPLG SLFVEDPDEPQNR              | 3.35 | 2,056.00 |
| ATP | 6006 | vascular endothelial cadherin precursor | gi 34305299,gi 48675381,gi 75071940                           | 87,450.60 | 100.00% | 10 | 13 | 16 | 0.17% | 11.40% | VGSPPLG SLFVEDPDEPQNRK             | 2.63 | 2,184.09 |
| ATP | 6006 | vascular endothelial cadherin precursor | gi 34305299,gi 48675381,gi 75071940                           | 87,450.60 | 100.00% | 10 | 13 | 16 | 0.17% | 11.40% | YSFVQG EYR                         | 2.78 | 1,148.54 |
| ATP | 6006 | vascular endothelial cadherin precursor | gi 34305299,gi 48675381,gi 75071940                           | 87,450.60 | 100.00% | 10 | 13 | 16 | 0.17% | 11.40% | YTFSVPE DIR                        | 2.69 | 1,226.61 |
| ATP | 6006 | EH-domain containing 1                  | gi 110331767,gi 158455084,gi 59858079,gi 62751751,gi 75070053 | 60,666.10 | 99.80%  | 2  | 2  | 2  | 0.02% | 9.36%  | IGPEPTT DSFIAMHGPTG VVPGN ALVVDP R | 3.56 | 3,288.66 |
| ATP | 6006 | EH-domain containing 1                  | gi 110331767,gi 158455084,gi 59858079,gi 62751751,gi 75070053 | 60,666.10 | 99.80%  | 2  | 2  | 2  | 0.02% | 9.36%  | LFEAEE QDLFKDI QSLPR               | 3.07 | 2,178.11 |
| ATP | 6006 | LOC515309 protein                       | gi 148878460,gi 149773584                                     | 31,548.40 | 100.00% | 3  | 4  | 4  | 0.04% | 15.20% | ASDYGM KLPILR                      | 2.54 | 1,379.74 |
| ATP | 6006 | LOC515309 protein                       | gi 148878460,gi 149773584                                     | 31,548.40 | 100.00% | 3  | 4  | 4  | 0.04% | 15.20% | KEEEEEEE EYDEG SNLKR               | 4.27 | 2,241.96 |
| ATP | 6006 | LOC515309 protein                       | gi 148878460,gi 149773584                                     | 31,548.40 | 100.00% | 3  | 4  | 4  | 0.04% | 15.20% | SNPEDQI LYQTER                     | 2.84 | 1,592.76 |
| ATP | 6006 | PREDICTED: lamin B2                     | gi 194668843                                                  | 70,532.10 | 100.00% | 3  | 3  | 3  | 0.03% | 12.10% | ALELEN DRLQLK                      | 3.15 | 1,441.80 |

|     |      |                                                                     |                                                  |           |         |   |   |   |       |        |                                              |      |          |
|-----|------|---------------------------------------------------------------------|--------------------------------------------------|-----------|---------|---|---|---|-------|--------|----------------------------------------------|------|----------|
| ATP | 6006 | PREDIC TED: lamin B2                                                | gi 194668843                                     | 70,532.10 | 100.00% | 3 | 3 | 3 | 0.03% | 12.10% | ETENGE<br>EGEDEA<br>AEFGEE<br>DLFHQQ<br>GDPR | 3.32 | 3,164.28 |
| ATP | 6006 | PREDIC TED: lamin B2                                                | gi 194668843                                     | 70,532.10 | 100.00% | 3 | 3 | 3 | 0.03% | 12.10% | LALDME<br>ISAYRK                             | 2.46 | 1,425.74 |
| ATP | 6006 | PREDIC TED: lamin B2                                                | gi 194668843                                     | 70,532.10 | 100.00% | 3 | 3 | 3 | 0.03% | 12.10% | LLEGE<br>RLK                                 | 3.1  | 1,215.66 |
| ATP | 6006 | PREDIC TED: lamin B2                                                | gi 194668843                                     | 70,532.10 | 100.00% | 3 | 3 | 3 | 0.03% | 12.10% | TTLVNA<br>DGEEVA<br>MR                       | 3.41 | 1,521.72 |
| ATP | 6006 | acyl-CoA synthetase long-chain family member 5                      | gi 115497154,gi 152941112,gi 94534758            | 76,013.10 | 100.00% | 3 | 3 | 3 | 0.03% | 5.86%  | ALVLISN<br>VEK                               | 2.63 | 1,085.66 |
| ATP | 6006 | acyl-CoA synthetase long-chain family member 5                      | gi 115497154,gi 152941112,gi 94534758            | 76,013.10 | 100.00% | 3 | 3 | 3 | 0.03% | 5.86%  | GAMLTH<br>ANIVSN<br>ASGFLK                   | 3.17 | 1,846.95 |
| ATP | 6006 | acyl-CoA synthetase long-chain family member 5                      | gi 115497154,gi 152941112,gi 94534758            | 76,013.10 | 100.00% | 3 | 3 | 3 | 0.03% | 5.86%  | TLKPTLF<br>PTVPR                             | 2.44 | 1,369.82 |
| ATP | 6006 | PREDIC TED: thrombomodulin                                          | gi 119905421                                     | 60,710.90 | 99.80%  | 2 | 2 | 2 | 0.02% | 4.84%  | GPATFL<br>AASR                               | 2.66 | 990.5367 |
| ATP | 6006 | PREDIC TED: thrombomodulin                                          | gi 119905421                                     | 60,710.90 | 99.80%  | 2 | 2 | 2 | 0.02% | 4.84%  | SSVAED<br>VISLLS<br>GDGPR                    | 2.71 | 1,814.95 |
| ATP | 6006 | transporter 2, ATP-binding cassette, sub-family B                   | gi 114051053,gi 19171652,gi 27806345,gi 63169160 | 79,287.60 | 100.00% | 2 | 2 | 2 | 0.02% | 4.31%  | LQTVQS<br>ADQVLV<br>LR                       | 3.6  | 1,569.90 |
| ATP | 6006 | transporter 2, ATP-binding cassette, sub-family B                   | gi 114051053,gi 19171652,gi 27806345,gi 63169160 | 79,287.60 | 100.00% | 2 | 2 | 2 | 0.02% | 4.31%  | QVVLVG<br>QEPVLFS<br>GSR                     | 4.34 | 1,814.02 |
| ATP | 6006 | ATP synthase, H+ transporting, mitochondrial F0 complex, subunit F2 | gi 165973956,gi 2493087,gi 81294315              | 10,254.50 | 99.80%  | 2 | 3 | 3 | 0.03% | 25.00% | DFTPSGI<br>AGAFQR                            | 2.35 | 1,366.68 |



|     |      |                                                                      |                                                                                         |           |         |   |   |   |       |        |                                             |          |
|-----|------|----------------------------------------------------------------------|-----------------------------------------------------------------------------------------|-----------|---------|---|---|---|-------|--------|---------------------------------------------|----------|
| ATP | 6006 | ATP synthase, H+ transporting, mitochondrial F0 complex, subunit F2  | gi 165973956,gi 2493087,gi 81294315                                                     | 10,254.50 | 99.80%  | 2 | 3 | 3 | 0.03% | 25.00% | YYNKYV NVK 2.42                             | 1,190.62 |
| ATP | 6006 | glutaminyl-peptide cyclotransferase-like                             | gi 110331975,gi 110331977,gi 112362220,gi 15495265,gi 122146335,gi 95768579,gi 95769160 | 41,828.70 | 99.80%  | 2 | 2 | 2 | 0.02% | 10.70% | ELRGPLI 4.01<br>GSLPEAR                     | 1,507.86 |
| ATP | 6006 | glutaminyl-peptide cyclotransferase-like                             | gi 110331975,gi 110331977,gi 112362220,gi 15495265,gi 122146335,gi 95768579,gi 95769160 | 41,828.70 | 99.80%  | 2 | 2 | 2 | 0.02% | 10.70% | IQAIELF 3.15<br>MLLDLL<br>GAPNPT<br>FYSHFPR | 3,019.58 |
| ATP | 6006 | RecName : Full=Malate dehydrogenase, mitochondrial; Flags: Precursor | gi 118572778,gi 81674781                                                                | 35,651.00 | 100.00% | 6 | 6 | 6 | 0.06% | 29.90% | AGAGSA 3.36<br>TLSMAY<br>AGAR               | 1,470.70 |
| ATP | 6006 | RecName : Full=Malate dehydrogenase, mitochondrial; Flags: Precursor | gi 118572778,gi 81674781                                                                | 35,651.00 | 100.00% | 6 | 6 | 6 | 0.06% | 29.90% | ANAFVA 4.19<br>ELKDLD<br>PAR                | 1,629.86 |
| ATP | 6006 | RecName : Full=Malate dehydrogenase, mitochondrial; Flags: Precursor | gi 118572778,gi 81674781                                                                | 35,651.00 | 100.00% | 6 | 6 | 6 | 0.06% | 29.90% | LTLYDIA 2.8<br>HTPGVA<br>ADLSHIE<br>TR      | 2,393.25 |

|     |      |                                                                                                                                                   |           |         |   |   |    |       |        |                                  |          |
|-----|------|---------------------------------------------------------------------------------------------------------------------------------------------------|-----------|---------|---|---|----|-------|--------|----------------------------------|----------|
| ATP | 6006 | RecName gi 1185727 :<br>78,gi 81674<br>Full=Mal 781<br>ate<br>dehydrog<br>enase,<br>mitochon<br>drial;<br>Flags:<br>Precursor                     | 35,651.00 | 100.00% | 6 | 6 | 6  | 0.06% | 29.90% | VAVLGA 2.31<br>SGGIGQP<br>LSLLLK | 1,793.09 |
| ATP | 6006 | RecName gi 1185727 :<br>78,gi 81674<br>Full=Mal 781<br>ate<br>dehydrog<br>enase,<br>mitochon<br>drial;<br>Flags:<br>Precursor                     | 35,651.00 | 100.00% | 6 | 6 | 6  | 0.06% | 29.90% | VNVPVI 3.33<br>GGHAGK            | 1,147.66 |
| ATP | 6006 | RecName gi 1185727 :<br>78,gi 81674<br>Full=Mal 781<br>ate<br>dehydrog<br>enase,<br>mitochon<br>drial;<br>Flags:<br>Precursor                     | 35,651.00 | 100.00% | 6 | 6 | 6  | 0.06% | 29.90% | VSPFEEK 2.85<br>MIAEAIP<br>ELK   | 1,947.01 |
| ATP | 6006 | Chain A, gi 1105910 24,651.00<br>Subcomp 26,gi 11059<br>lex Of 1029,gi 602<br>The 033<br>Stator Of<br>Bovine<br>Mitochon<br>drial Atp<br>Synthase | 24,651.00 | 100.00% | 6 | 8 | 15 | 0.16% | 31.30% | FGLIPEE 2.15<br>FFQFLYP<br>K     | 1,874.97 |
| ATP | 6006 | Chain A, gi 1105910 24,651.00<br>Subcomp 26,gi 11059<br>lex Of 1029,gi 602<br>The 033<br>Stator Of<br>Bovine<br>Mitochon<br>drial Atp<br>Synthase | 24,651.00 | 100.00% | 6 | 8 | 15 | 0.16% | 31.30% | HYLFDV 2.75<br>QR                | 1,077.55 |
| ATP | 6006 | Chain A, gi 1105910 24,651.00<br>Subcomp 26,gi 11059<br>lex Of 1029,gi 602<br>The 033<br>Stator Of<br>Bovine<br>Mitochon<br>drial Atp<br>Synthase | 24,651.00 | 100.00% | 6 | 8 | 15 | 0.16% | 31.30% | IAQLEEV 4.52<br>KQASIK           | 1,456.84 |

|     |      |                                                                         |                                                                                                          |           |         |   |   |    |       |        |                           |      |          |
|-----|------|-------------------------------------------------------------------------|----------------------------------------------------------------------------------------------------------|-----------|---------|---|---|----|-------|--------|---------------------------|------|----------|
| ATP | 6006 | Chain A, Subcomp lex Of The Stator Of Bovine Mitochondrial Atp Synthase | gi 110591026,gi 110591029,gi 602033                                                                      | 24,651.00 | 100.00% | 6 | 8 | 15 | 0.16% | 31.30% | NNIAMA LEV TYR            | 3.63 | 1,410.70 |
| ATP | 6006 | Chain A, Subcomp lex Of The Stator Of Bovine Mitochondrial Atp Synthase | gi 110591026,gi 110591029,gi 602033                                                                      | 24,651.00 | 100.00% | 6 | 8 | 15 | 0.16% | 31.30% | QIQDAID MEKSQQ ALVQK      | 3.67 | 2,089.06 |
| ATP | 6006 | Chain A, Subcomp lex Of The Stator Of Bovine Mitochondrial Atp Synthase | gi 110591026,gi 110591029,gi 602033                                                                      | 24,651.00 | 100.00% | 6 | 8 | 15 | 0.16% | 31.30% | QIQDAID MEKSQQ ALVQKR     | 2.71 | 2,245.16 |
| ATP | 6006 | PREDICTED: similar to oxysterol 7alpha-hydroxylase                      | gi 194672764                                                                                             | 90,479.20 | 99.90%  | 2 | 2 | 3  | 0.03% | 4.47%  | FLFGIPY PDS DVL FR        | 2.27 | 1,785.92 |
| ATP | 6006 | PREDICTED: similar to oxysterol 7alpha-hydroxylase                      | gi 194672764                                                                                             | 90,479.20 | 99.90%  | 2 | 2 | 3  | 0.03% | 4.47%  | MLT DSD LIDEIHS TYQFLQ GK | 3.95 | 2,470.18 |
| ATP | 6006 | p33/41 (annexin IV)                                                     | gi 1063258, gi 113956, gi 14278334, gi 1578299, gi 157830000, gi 163030, gi 216, gi 4837408, gi 74353976 | 35,872.70 | 100.00% | 3 | 3 | 3  | 0.03% | 11.90% | GLGTDD DTLIR              | 2.76 | 1,175.59 |
| ATP | 6006 | p33/41 (annexin IV)                                                     | gi 1063258, gi 113956, gi 14278334, gi 1578299, gi 157830000, gi 163030, gi 216, gi 4837408, gi 74353976 | 35,872.70 | 100.00% | 3 | 3 | 3  | 0.03% | 11.90% | GLGTDE DAIINVL AYR        | 2.92 | 1,719.89 |

|     |      |                                                                     |                                                                                                                                         |           |         |   |    |    |       |        |                                           |      |          |
|-----|------|---------------------------------------------------------------------|-----------------------------------------------------------------------------------------------------------------------------------------|-----------|---------|---|----|----|-------|--------|-------------------------------------------|------|----------|
| ATP | 6006 | p33/41<br>(annexin<br>IV)                                           | gi 1063258,<br>gi 113956,g<br>i 14278334,<br>gi 1578299<br>85,gi 15783<br>0000,gi 163<br>030,gi 216,<br>gi 4837408<br>3,gi 743539<br>76 | 35,872.70 | 100.00% | 3 | 3  | 3  | 0.03% | 11.90% | INQTYQ<br>LQYGR                           | 2.71 | 1,383.70 |
| ATP | 6006 | TUBA1B<br>protein                                                   | gi 1488780<br>19,gi 16880<br>4008                                                                                                       | 50,133.70 | 100.00% | 8 | 11 | 13 | 0.14% | 26.40% | AVFVDL<br>EPTVIDE<br>VR                   | 3.75 | 1,701.91 |
| ATP | 6006 | TUBA1B<br>protein                                                   | gi 1488780<br>19,gi 16880<br>4008                                                                                                       | 50,133.70 | 100.00% | 8 | 11 | 13 | 0.14% | 26.40% | DVNAAI<br>ATIK                            | 3.07 | 1,015.58 |
| ATP | 6006 | TUBA1B<br>protein                                                   | gi 1488780<br>19,gi 16880<br>4008                                                                                                       | 50,133.70 | 100.00% | 8 | 11 | 13 | 0.14% | 26.40% | EIIDLVL<br>DR                             | 2.43 | 1,085.62 |
| ATP | 6006 | TUBA1B<br>protein                                                   | gi 1488780<br>19,gi 16880<br>4008                                                                                                       | 50,133.70 | 100.00% | 8 | 11 | 13 | 0.14% | 26.40% | IHFPLAT<br>YAPVISA<br>EK                  | 3.24 | 1,756.96 |
| ATP | 6006 | TUBA1B<br>protein                                                   | gi 1488780<br>19,gi 16880<br>4008                                                                                                       | 50,133.70 | 100.00% | 8 | 11 | 13 | 0.14% | 26.40% | LISQIVSS<br>ITASLR                        | 4.07 | 1,487.88 |
| ATP | 6006 | TUBA1B<br>protein                                                   | gi 1488780<br>19,gi 16880<br>4008                                                                                                       | 50,133.70 | 100.00% | 8 | 11 | 13 | 0.14% | 26.40% | NLDIERP<br>TYTNLN<br>R                    | 2.5  | 1,718.88 |
| ATP | 6006 | TUBA1B<br>protein                                                   | gi 1488780<br>19,gi 16880<br>4008                                                                                                       | 50,133.70 | 100.00% | 8 | 11 | 13 | 0.14% | 26.40% | QLFHPE<br>QLITGKE<br>DAANNY<br>AR         | 3.41 | 2,415.21 |
| ATP | 6006 | TUBA1B<br>protein                                                   | gi 1488780<br>19,gi 16880<br>4008                                                                                                       | 50,133.70 | 100.00% | 8 | 11 | 13 | 0.14% | 26.40% | TIGGGD<br>DSFNTEF<br>SETGAG<br>K          | 2.6  | 2,007.89 |
| ATP | 6006 | PREDIC<br>TED:<br>similar to<br>transmem<br>brane<br>protein<br>165 | gi 7661992<br>4                                                                                                                         | 34,667.10 | 99.80%  | 2 | 2  | 3  | 0.03% | 13.30% | MSPDEG<br>QEELEE<br>VQAELK                | 3.25 | 2,076.93 |
| ATP | 6006 | PREDIC<br>TED:<br>similar to<br>transmem<br>brane<br>protein<br>165 | gi 7661992<br>4                                                                                                                         | 34,667.10 | 99.80%  | 2 | 2  | 3  | 0.03% | 13.30% | NKEPPA<br>PAQQLQ<br>PQPAAV<br>QGPEPA<br>R | 5.13 | 2,619.36 |

|     |      |                                                                                                                                                                                                                                                                                                                         |        |   |   |   |       |        |                           |      |          |
|-----|------|-------------------------------------------------------------------------------------------------------------------------------------------------------------------------------------------------------------------------------------------------------------------------------------------------------------------------|--------|---|---|---|-------|--------|---------------------------|------|----------|
| ATP | 6006 | RecName gi 1171870, 20,073.10<br>: gi 2846127<br>Full=NA 5,gi 599681<br>DH ,gi 8682766<br>dehydrog 4<br>enase<br>[ubiquino<br>ne] 1<br>alpha<br>subcompl<br>ex<br>subunit<br>8;<br>AltName:<br>Full=NA<br>DH-<br>ubiquino<br>ne<br>oxidored<br>uctase 19<br>kDa<br>subunit;<br>AltName:<br>Full=Co<br>mplex I-<br>19kD; | 99.80% | 2 | 2 | 2 | 0.02% | 18.60% | ARPEPN<br>PEVEGD<br>LKPAR | 6.5  | 1,874.97 |
| ATP | 6006 | RecName gi 1171870, 20,073.10<br>: gi 2846127<br>Full=NA 5,gi 599681<br>DH ,gi 8682766<br>dehydrog 4<br>enase<br>[ubiquino<br>ne] 1<br>alpha<br>subcompl<br>ex<br>subunit<br>8;<br>AltName:<br>Full=NA<br>DH-<br>ubiquino<br>ne<br>oxidored<br>uctase 19<br>kDa<br>subunit;<br>AltName:<br>Full=Co<br>mplex I-<br>19kD; | 99.80% | 2 | 2 | 2 | 0.02% | 18.60% | VKTDRP<br>LPENPY<br>HSR   | 4.31 | 1,808.94 |



























|     |      |                                                                                                                                                                                                                                               |                                                                   |            |         |    |    |    |       |        |                                   |      |          |
|-----|------|-----------------------------------------------------------------------------------------------------------------------------------------------------------------------------------------------------------------------------------------------|-------------------------------------------------------------------|------------|---------|----|----|----|-------|--------|-----------------------------------|------|----------|
| ATP | 6006 | RecName gi 266647<br>:<br>Full=Nitric oxide synthase, endothelial;<br>AltName: Full=Endothelial NOS;<br>Short=eNOS;<br>AltName: Full=EC-NOS;<br>AltName: Full=NO S type III;<br>Short=NO SIII;<br>AltName: Full=Constitutive NOS;<br>Short=cN | gi 266647                                                         | 133,270.00 | 100.00% | 23 | 30 | 38 | 0.40% | 18.70% | YRLSTQ<br>AEGLQL<br>LPGLIHV<br>HR | 2.56 | 2,401.35 |
| ATP | 6006 | solute carrier family 7 (cationic amino acid transporter, y+ system), member 1                                                                                                                                                                | gi 2094470<br>36,gi 88954<br>020                                  | 67,875.80  | 99.80%  | 2  | 2  | 2  | 0.02% | 4.29%  | VIYAMA<br>EDGLLF<br>K             | 2.85 | 1,485.77 |
| ATP | 6006 | solute carrier family 7 (cationic amino acid transporter, y+ system), member 1                                                                                                                                                                | gi 2094470<br>36,gi 88954<br>020                                  | 67,875.80  | 99.80%  | 2  | 2  | 2  | 0.02% | 4.29%  | YQPEQP<br>NTVYQ<br>MAR            | 2.13 | 1,740.80 |
| ATP | 6006 | PREDICTED: similar to eukaryotic translation elongation factor 1 alpha 1 isoform 1                                                                                                                                                            | gi 1199383<br>28,gi 14874<br>5492,gi 682<br>99807,gi 86<br>827651 | 50,141.20  | 100.00% | 7  | 8  | 9  | 0.09% | 19.30% | DMRQTV<br>AVGVK                   | 3.1  | 1,332.73 |
| ATP | 6006 | PREDICTED: similar to eukaryotic translation elongation factor 1 alpha 1 isoform 1                                                                                                                                                            | gi 1199383<br>28,gi 14874<br>5492,gi 682<br>99807,gi 86<br>827651 | 50,141.20  | 100.00% | 7  | 8  | 9  | 0.09% | 19.30% | EHALLA<br>YTLGVK                  | 3.57 | 1,314.74 |

|     |      |                                                                                     |                                                   |           |         |   |   |   |       |        |                             |      |          |
|-----|------|-------------------------------------------------------------------------------------|---------------------------------------------------|-----------|---------|---|---|---|-------|--------|-----------------------------|------|----------|
| ATP | 6006 | PREDIC TED: similar to eukaryotic translation elongation factor 1 alpha 1 isoform 1 | gi 119938328,gi 148745492,gi 68299807,gi 86827651 | 50,141.20 | 100.00% | 7 | 8 | 9 | 0.09% | 19.30% | IGGIGTV PVGR                | 3.58 | 1,025.61 |
| ATP | 6006 | PREDIC TED: similar to eukaryotic translation elongation factor 1 alpha 1 isoform 1 | gi 119938328,gi 148745492,gi 68299807,gi 86827651 | 50,141.20 | 100.00% | 7 | 8 | 9 | 0.09% | 19.30% | TIEKFEK EAAEMG K            | 2.71 | 1,626.80 |
| ATP | 6006 | PREDIC TED: similar to eukaryotic translation elongation factor 1 alpha 1 isoform 1 | gi 119938328,gi 148745492,gi 68299807,gi 86827651 | 50,141.20 | 100.00% | 7 | 8 | 9 | 0.09% | 19.30% | VETGVL KPGMVV TFAPVN VTTEVK | 5.06 | 2,531.38 |
| ATP | 6006 | PREDIC TED: similar to eukaryotic translation elongation factor 1 alpha 1 isoform 1 | gi 119938328,gi 148745492,gi 68299807,gi 86827651 | 50,141.20 | 100.00% | 7 | 8 | 9 | 0.09% | 19.30% | YYVTIID APGHR               | 2.56 | 1,404.73 |
| ATP | 6006 | PREDIC TED: similar to eukaryotic translation elongation factor 1 alpha 1 isoform 1 | gi 119938328,gi 148745492,gi 68299807,gi 86827651 | 50,141.20 | 100.00% | 7 | 8 | 9 | 0.09% | 19.30% | YYVTIID APGHRD FIK          | 2.35 | 1,908.00 |
| ATP | 6006 | cell division cycle 42 (GTP binding protein, 25kDa)                                 | gi 114052486,gi 122063301,gi 86821687             | 21,240.70 | 100.00% | 3 | 3 | 5 | 0.05% | 21.50% | GLKNVF DEAILAA LEPPEPK      | 3.44 | 2,151.17 |
| ATP | 6006 | cell division cycle 42 (GTP binding protein, 25kDa)                                 | gi 114052486,gi 122063301,gi 86821687             | 21,240.70 | 100.00% | 3 | 3 | 5 | 0.05% | 21.50% | NVFDEAI LAALEPP EPK         | 4.19 | 1,852.97 |

|     |      |                                                                                         |                                                   |           |         |   |   |   |       |        |                                           |          |
|-----|------|-----------------------------------------------------------------------------------------|---------------------------------------------------|-----------|---------|---|---|---|-------|--------|-------------------------------------------|----------|
| ATP | 6006 | cell<br>division<br>cycle 42<br>(GTP<br>binding<br>protein,<br>25kDa)                   | gi 1140524<br>86,gi 12206<br>3301,gi 868<br>21687 | 21,240.70 | 100.00% | 3 | 3 | 5 | 0.05% | 21.50% | TPFLLVG 3.59<br>TQIDLRD<br>DPSTIEK        | 2,358.26 |
| ATP | 6006 | RecName<br>:<br>Full=Gol<br>gi SNAP<br>receptor<br>complex<br>member<br>1               | gi 1089359<br>98,gi 83638<br>559,gi 8437<br>0083  | 28,524.90 | 99.80%  | 2 | 2 | 3 | 0.03% | 11.60% | ENMTSQ 3.91<br>RGMLKS<br>IQSK             | 1,837.93 |
| ATP | 6006 | RecName<br>:<br>Full=Gol<br>gi SNAP<br>receptor<br>complex<br>member<br>1               | gi 1089359<br>98,gi 83638<br>559,gi 8437<br>0083  | 28,524.90 | 99.80%  | 2 | 2 | 3 | 0.03% | 11.60% | RTEFLFK 2.8<br>EHDHLR                     | 1,693.91 |
| ATP | 6006 | minor<br>histocom<br>patibility<br>antigen<br>13                                        | gi 1644486<br>16                                  | 41,537.10 | 100.00% | 3 | 3 | 4 | 0.04% | 10.90% | GEVTEM 3.27<br>FSYEESN<br>PKDPAA<br>VTETR | 2,703.21 |
| ATP | 6006 | minor<br>histocom<br>patibility<br>antigen<br>13                                        | gi 1644486<br>16                                  | 41,537.10 | 100.00% | 3 | 3 | 4 | 0.04% | 10.90% | LVFPQD 2.22<br>LLEK                       | 1,201.68 |
| ATP | 6006 | minor<br>histocom<br>patibility<br>antigen<br>13                                        | gi 1644486<br>16                                  | 41,537.10 | 100.00% | 3 | 3 | 4 | 0.04% | 10.90% | SFEAPIK 3<br>LVFPQD<br>LLEK               | 1,974.09 |
| ATP | 6006 | PREDIC<br>TED:<br>similar to<br>vesicle<br>amine<br>transport<br>protein 1<br>isoform 1 | gi 7667127<br>8                                   | 42,822.00 | 100.00% | 4 | 4 | 4 | 0.04% | 14.70% | GVDIVM 4.24<br>DPLGGS<br>DTAK             | 1,590.77 |
| ATP | 6006 | PREDIC<br>TED:<br>similar to<br>vesicle<br>amine<br>transport<br>protein 1<br>isoform 1 | gi 7667127<br>8                                   | 42,822.00 | 100.00% | 4 | 4 | 4 | 0.04% | 14.70% | LLALYN 1.94<br>QGHIKP<br>R                | 1,522.89 |
| ATP | 6006 | PREDIC<br>TED:<br>similar to<br>vesicle<br>amine<br>transport<br>protein 1<br>isoform 1 | gi 7667127<br>8                                   | 42,822.00 | 100.00% | 4 | 4 | 4 | 0.04% | 14.70% | LQTRPA 3.24<br>APPAPG<br>TGQLTL<br>R      | 1,945.10 |
| ATP | 6006 | PREDIC<br>TED:<br>similar to<br>vesicle<br>amine<br>transport<br>protein 1<br>isoform 1 | gi 7667127<br>8                                   | 42,822.00 | 100.00% | 4 | 4 | 4 | 0.04% | 14.70% | VLLVPG 2.82<br>PEKEN                      | 1,194.67 |

|     |      |                                                                                                                                                |            |           |         |   |   |   |       |       |                                     |      |          |
|-----|------|------------------------------------------------------------------------------------------------------------------------------------------------|------------|-----------|---------|---|---|---|-------|-------|-------------------------------------|------|----------|
| ATP | 6006 | PREDIC TED: 42<br>similar to Feline leukemia virus subgroup C receptor-related protein 1 (Feline leukemia virus subgroup C receptor) (hFLVC R) | gi 1946742 | 59,731.10 | 100.00% | 3 | 3 | 3 | 0.03% | 7.73% | ATASGT<br>PDGPKT<br>PLAPEEE<br>TQAR | 4.06 | 2,324.14 |
| ATP | 6006 | PREDIC TED: 42<br>similar to Feline leukemia virus subgroup C receptor-related protein 1 (Feline leukemia virus subgroup C receptor) (hFLVC R) | gi 1946742 | 59,731.10 | 100.00% | 3 | 3 | 3 | 0.03% | 7.73% | DPGEET<br>PGGEGT<br>LVPR            | 3.45 | 1,610.77 |
| ATP | 6006 | PREDIC TED: 42<br>similar to Feline leukemia virus subgroup C receptor-related protein 1 (Feline leukemia virus subgroup C receptor) (hFLVC R) | gi 1946742 | 59,731.10 | 100.00% | 3 | 3 | 3 | 0.03% | 7.73% | LLPKDP<br>GEETPG<br>GEGTLV<br>PR    | 3.37 | 2,062.08 |

|     |      |                                                                                                                                                              |                                                 |           |        |   |   |   |       |        |                                                   |          |
|-----|------|--------------------------------------------------------------------------------------------------------------------------------------------------------------|-------------------------------------------------|-----------|--------|---|---|---|-------|--------|---------------------------------------------------|----------|
| ATP | 6006 | RecName gi 122572.g<br>:<br>Full=He<br>moglobin<br>subunit<br>beta;<br>AltName:<br>Full=He<br>moglobin<br>beta<br>chain;<br>AltName:<br>Full=Beta-<br>globin | gi 27819608,<br>gi 395                          | 15,936.20 | 99.80% | 2 | 3 | 9 | 0.09% | 28.30% | LLGNVL 4.93<br>VVVLAR                             | 1,265.83 |
| ATP | 6006 | RecName gi 122572.g<br>:<br>Full=He<br>moglobin<br>subunit<br>beta;<br>AltName:<br>Full=He<br>moglobin<br>beta<br>chain;<br>AltName:<br>Full=Beta-<br>globin | gi 27819608,<br>gi 395                          | 15,936.20 | 99.80% | 2 | 3 | 9 | 0.09% | 28.30% | LLGNVL 2.86<br>VVVLAR<br>NFGKEF<br>TPVLQA<br>DFQK | 3,115.77 |
| ATP | 6006 | RecName gi 122572.g<br>:<br>Full=He<br>moglobin<br>subunit<br>beta;<br>AltName:<br>Full=He<br>moglobin<br>beta<br>chain;<br>AltName:<br>Full=Beta-<br>globin | gi 27819608,<br>gi 395                          | 15,936.20 | 99.80% | 2 | 3 | 9 | 0.09% | 28.30% | NFGKEF 3.19<br>TPVLQA<br>DFQK                     | 1,868.95 |
| ATP | 6006 | RecName gi 122572.g<br>:<br>Full=He<br>moglobin<br>subunit<br>beta;<br>AltName:<br>Full=He<br>moglobin<br>beta<br>chain;<br>AltName:<br>Full=Beta-<br>globin | gi 27819608,<br>gi 395                          | 15,936.20 | 99.80% | 2 | 3 | 9 | 0.09% | 28.30% | VKVDEV 4.16<br>GGEALG<br>R                        | 1,328.72 |
| ATP | 6006 | H3<br>histone,<br>family<br>3A                                                                                                                               | gi 5985828<br>9,gi 621771<br>68,gi 95769<br>331 | 15,310.70 | 99.90% | 2 | 2 | 5 | 0.05% | 16.90% | EIAQDFK 3.05<br>TDLR                              | 1,335.69 |

|     |      |                                        |                                                               |            |         |   |   |   |       |        |                                         |          |
|-----|------|----------------------------------------|---------------------------------------------------------------|------------|---------|---|---|---|-------|--------|-----------------------------------------|----------|
| ATP | 6006 | H3 histone, family 3A                  | gi 59858289,gi 62177168,gi 95769331                           | 15,310.70  | 99.90%  | 2 | 2 | 5 | 0.05% | 16.90% | YRPGTV 2.4<br>ALREIR                    | 1,430.82 |
| ATP | 6006 | dihydroorotate dehydrogenase precursor | gi 110665638,gi 112362407,gi 59857979,gi 62751827,gi 75057853 | 42,758.80  | 99.80%  | 2 | 2 | 2 | 0.02% | 5.57%  | FTSLGLL 2.84<br>PR                      | 1,003.59 |
| ATP | 6006 | dihydroorotate dehydrogenase precursor | gi 110665638,gi 112362407,gi 59857979,gi 62751827,gi 75057853 | 42,758.80  | 99.80%  | 2 | 2 | 2 | 0.02% | 5.57%  | VFRLPE 2.97<br>DQAIINR                  | 1,570.87 |
| ATP | 6006 | calpactin I light chain                | gi 162785,gi 27807173,gi 46397705,gi 58760382,gi 74353914     | 11,185.50  | 99.80%  | 2 | 2 | 2 | 0.02% | 37.10% | FAGDKG 1.7<br>YLTKED<br>LR              | 1,612.83 |
| ATP | 6006 | calpactin I light chain                | gi 162785,gi 27807173,gi 46397705,gi 58760382,gi 74353914     | 11,185.50  | 99.80%  | 2 | 2 | 2 | 0.02% | 37.10% | VLMEKE 3.01<br>FPGFLEN<br>QKDPLA<br>VDK | 2,563.31 |
| ATP | 6006 | TM9SF4 protein                         | gi 146186797,gi 166063945,gi 172047290                        | 74,351.10  | 100.00% | 3 | 4 | 4 | 0.04% | 7.01%  | AENLGE 2.47<br>VLRGDR                   | 1,328.69 |
| ATP | 6006 | TM9SF4 protein                         | gi 146186797,gi 166063945,gi 172047290                        | 74,351.10  | 100.00% | 3 | 4 | 4 | 0.04% | 7.01%  | ISEDYYV 4.51<br>HLIADNL<br>PVATR        | 2,189.12 |
| ATP | 6006 | TM9SF4 protein                         | gi 146186797,gi 166063945,gi 172047290                        | 74,351.10  | 100.00% | 3 | 4 | 4 | 0.04% | 7.01%  | IVNTPFQ 3.66<br>VLMNSE<br>K             | 1,635.84 |
| ATP | 6006 | PREDICTED: plexin A2                   | gi 194674254                                                  | 210,938.30 | 100.00% | 5 | 5 | 5 | 0.05% | 3.85%  | FVDDLF 3.18<br>ETLFSTV<br>HR            | 1,825.91 |
| ATP | 6006 | PREDICTED: plexin A2                   | gi 194674254                                                  | 210,938.30 | 100.00% | 5 | 5 | 5 | 0.05% | 3.85%  | LEVHPSS 2.62<br>ISVSEHS<br>R            | 1,663.84 |
| ATP | 6006 | PREDICTED: plexin A2                   | gi 194674254                                                  | 210,938.30 | 100.00% | 5 | 5 | 5 | 0.05% | 3.85%  | LLQAAY 2.57<br>LAKPGD<br>ALAR           | 1,670.96 |
| ATP | 6006 | PREDICTED: plexin A2                   | gi 194674254                                                  | 210,938.30 | 100.00% | 5 | 5 | 5 | 0.05% | 3.85%  | LNTLMH 2.7<br>YQVSDR                    | 1,492.72 |
| ATP | 6006 | PREDICTED: plexin A2                   | gi 194674254                                                  | 210,938.30 | 100.00% | 5 | 5 | 5 | 0.05% | 3.85%  | QTSSYNI 3.28<br>PASASIS<br>R            | 1,581.79 |

|     |      |                                                                          |                                                                        |           |         |   |   |    |       |        |                                            |      |          |
|-----|------|--------------------------------------------------------------------------|------------------------------------------------------------------------|-----------|---------|---|---|----|-------|--------|--------------------------------------------|------|----------|
| ATP | 6006 | PREDICTED: similar to Glyceraldehyde-3-phosphate dehydrogenase isoform 2 | gi 119893091,gi 1841758,gi 2285903,gi 73587299,gi 77404273,gi 89573947 | 35,850.00 | 99.80%  | 2 | 2 | 4  | 0.04% | 11.70% | GAAQNII<br>PASTGA<br>AK                    | 3.22 | 1,369.74 |
| ATP | 6006 | PREDICTED: similar to Glyceraldehyde-3-phosphate dehydrogenase isoform 2 | gi 119893091,gi 1841758,gi 2285903,gi 73587299,gi 77404273,gi 89573947 | 35,850.00 | 99.80%  | 2 | 2 | 4  | 0.04% | 11.70% | VIHDHF<br>GIVEGL<br>MTTVHA<br>ITATQK       | 5.4  | 2,634.37 |
| ATP | 6006 | TMEM43 protein                                                           | gi 151556045,gi 156523072                                              | 44,774.20 | 100.00% | 3 | 3 | 3  | 0.03% | 12.70% | FFLSAGL<br>IDKVDN<br>FK                    | 2.15 | 1,713.92 |
| ATP | 6006 | TMEM43 protein                                                           | gi 151556045,gi 156523072                                              | 44,774.20 | 100.00% | 3 | 3 | 3  | 0.03% | 12.70% | LEDPHV<br>DIIR                             | 2.32 | 1,206.65 |
| ATP | 6006 | TMEM43 protein                                                           | gi 151556045,gi 156523072                                              | 44,774.20 | 100.00% | 3 | 3 | 3  | 0.03% | 12.70% | VSFSYA<br>GLSSDD<br>PDLGPA<br>HVVTVI<br>AR | 3.22 | 2,673.35 |
| ATP | 6006 | integral membrane protein 1                                              | gi 114051696,gi 122136222,gi 152941168,gi 86823970                     | 80,641.10 | 100.00% | 3 | 3 | 3  | 0.03% | 3.83%  | FLAEEGF<br>YK                              | 2.49 | 1,103.54 |
| ATP | 6006 | integral membrane protein 1                                              | gi 114051696,gi 122136222,gi 152941168,gi 86823970                     | 80,641.10 | 100.00% | 3 | 3 | 3  | 0.03% | 3.83%  | FYSLLDP<br>SYAK                            | 2.3  | 1,303.66 |
| ATP | 6006 | integral membrane protein 1                                              | gi 114051696,gi 122136222,gi 152941168,gi 86823970                     | 80,641.10 | 100.00% | 3 | 3 | 3  | 0.03% | 3.83%  | IIFDDFR                                    | 2.02 | 925.4779 |
| ATP | 6006 | Myeloid-associated differentiation marker                                | gi 111308557,gi 115497460                                              | 35,291.10 | 100.00% | 3 | 6 | 12 | 0.13% | 14.60% | ARPGEIT<br>GYMATV<br>PGLLK                 | 4.38 | 1,890.02 |
| ATP | 6006 | Myeloid-associated differentiation marker                                | gi 111308557,gi 115497460                                              | 35,291.10 | 100.00% | 3 | 6 | 12 | 0.13% | 14.60% | LVFVRV                                     | 2.05 | 732.4766 |
| ATP | 6006 | Myeloid-associated differentiation marker                                | gi 111308557,gi 115497460                                              | 35,291.10 | 100.00% | 3 | 6 | 12 | 0.13% | 14.60% | TTVTTT<br>MSSSSG<br>LGSPTIV<br>GSPR        | 4.86 | 2,240.11 |

|     |      |                                                                                                                                                                       |                                                                                               |            |        |   |   |   |       |        |                                 |          |
|-----|------|-----------------------------------------------------------------------------------------------------------------------------------------------------------------------|-----------------------------------------------------------------------------------------------|------------|--------|---|---|---|-------|--------|---------------------------------|----------|
| ATP | 6006 | ribosomal protein L24                                                                                                                                                 | gi 27806129,gi 28189314,gi 28189753,gi 2819757,gi 28189765,gi 3132823,gi 41019240,gi 74267598 | 17,630.30  | 99.80% | 2 | 2 | 2 | 0.02% | 16.00% | AITGASL 3.31<br>ADIMAK          | 1,277.68 |
| ATP | 6006 | ribosomal protein L24                                                                                                                                                 | gi 27806129,gi 28189314,gi 28189753,gi 2819757,gi 28189765,gi 3132823,gi 41019240,gi 74267598 | 17,630.30  | 99.80% | 2 | 2 | 2 | 0.02% | 16.00% | TDGKVF 3.96<br>QFLNAK           | 1,367.73 |
| ATP | 6006 | PREDICTED: similar to Atrial natriuretic peptide receptor A precursor (ANP-A) (ANPRA) (GC-A) (Guanylate cyclase) (NPR-A) (Atrial natriuretic peptide A-type receptor) | gi 194665089                                                                                  | 119,021.60 | 99.80% | 2 | 2 | 2 | 0.02% | 2.63%  | IITYKEP 3.42<br>DNPEYL<br>EFLQK | 2,240.15 |
| ATP | 6006 | PREDICTED: similar to Atrial natriuretic peptide receptor A precursor (ANP-A) (ANPRA) (GC-A) (Guanylate cyclase) (NPR-A) (Atrial natriuretic peptide A-type receptor) | gi 194665089                                                                                  | 119,021.60 | 99.80% | 2 | 2 | 2 | 0.02% | 2.63%  | MALALL 3.18<br>DAVR             | 1,088.61 |



|     |      |                                                                                                                                           |           |         |   |   |    |       |        |                        |          |
|-----|------|-------------------------------------------------------------------------------------------------------------------------------------------|-----------|---------|---|---|----|-------|--------|------------------------|----------|
| ATP | 6006 | PREDIC TED: gi 1946854 81.gi 19468 similar to 5483 Keratin 10 (epiderm olytic hyperkera tosis; keratosis palmaris et plantaris) isoform 2 | 54,832.90 | 100.00% | 7 | 8 | 13 | 0.14% | 12.00% | DAEAWF 2.73<br>NEK     | 1,109.49 |
| ATP | 6006 | PREDIC TED: gi 1946854 81.gi 19468 similar to 5483 Keratin 10 (epiderm olytic hyperkera tosis; keratosis palmaris et plantaris) isoform 2 | 54,832.90 | 100.00% | 7 | 8 | 13 | 0.14% | 12.00% | IRLENEI 4.48<br>QTYR   | 1,434.77 |
| ATP | 6006 | PREDIC TED: gi 1946854 81.gi 19468 similar to 5483 Keratin 10 (epiderm olytic hyperkera tosis; keratosis palmaris et plantaris) isoform 2 | 54,832.90 | 100.00% | 7 | 8 | 13 | 0.14% | 12.00% | LASYLD 3.06<br>KVR     | 1,064.61 |
| ATP | 6006 | PREDIC TED: gi 1946854 81.gi 19468 similar to 5483 Keratin 10 (epiderm olytic hyperkera tosis; keratosis palmaris et plantaris) isoform 2 | 54,832.90 | 100.00% | 7 | 8 | 13 | 0.14% | 12.00% | LENEIQT 3.62<br>YR     | 1,165.58 |
| ATP | 6006 | PREDIC TED: gi 1946854 81.gi 19468 similar to 5483 Keratin 10 (epiderm olytic hyperkera tosis; keratosis palmaris et plantaris) isoform 2 | 54,832.90 | 100.00% | 7 | 8 | 13 | 0.14% | 12.00% | QSLEASL 4.34<br>AETEGR | 1,390.68 |

|     |      |                                                                                                            |                                                 |           |         |   |   |    |       |        |                                              |      |          |
|-----|------|------------------------------------------------------------------------------------------------------------|-------------------------------------------------|-----------|---------|---|---|----|-------|--------|----------------------------------------------|------|----------|
| ATP | 6006 | PREDICTED: similar to Keratin 10 (epidermolytic hyperkeratosis; keratosis palmaris et plantaris) isoform 2 | gi 194685481.gi 194685481                       | 54,832.90 | 100.00% | 7 | 8 | 13 | 0.14% | 12.00% | RVLDEL TLTK                                  | 2.97 | 1,187.70 |
| ATP | 6006 | PREDICTED: similar to Keratin 10 (epidermolytic hyperkeratosis; keratosis palmaris et plantaris) isoform 2 | gi 194685481.gi 194685481                       | 54,832.90 | 100.00% | 7 | 8 | 13 | 0.14% | 12.00% | SQYEQL AEKNR                                 | 3.71 | 1,365.68 |
| ATP | 6006 | PREDICTED: similar to Keratin 10 (epidermolytic hyperkeratosis; keratosis palmaris et plantaris) isoform 2 | gi 194685481.gi 194685481                       | 54,832.90 | 100.00% | 7 | 8 | 13 | 0.14% | 12.00% | VLDELTLTK                                    | 3.84 | 1,031.60 |
| ATP | 6006 | MATR3 protein 3084                                                                                         | gi 134024643.gi 156523084                       | 93,810.30 | 99.80%  | 2 | 2 | 2  | 0.02% | 5.57%  | DLDELS RYPEDKI TPENLP QILLQLK                | 3.26 | 3,080.65 |
| ATP | 6006 | MATR3 protein 3084                                                                                         | gi 134024643.gi 156523084                       | 93,810.30 | 99.80%  | 2 | 2 | 2  | 0.02% | 5.57%  | YQLLQL VEPFGVI SNHLILN K                     | 2.77 | 2,438.38 |
| ATP | 6006 | Transferrin 6282                                                                                           | gi 113911795.gi 114326282                       | 77,721.80 | 99.80%  | 2 | 3 | 67 | 0.70% | 8.10%  | AISNNEA DAVTLD GGLVYE AGLKPN NLKPVV AEFHGT K | 2.7  | 3,952.05 |
| ATP | 6006 | Transferrin 6282                                                                                           | gi 113911795.gi 114326282                       | 77,721.80 | 99.80%  | 2 | 3 | 67 | 0.70% | 8.10%  | MDFELY LGYEYV TALQNL R                       | 4.85 | 2,338.14 |
| ATP | 6006 | Mannose-6-phosphate receptor (cation dependent)                                                            | gi 111308551.gi 119936494.gi 127292.gi 28461185 | 31,183.50 | 100.00% | 5 | 8 | 11 | 0.12% | 19.70% | GVGDDQ LGEESEE R                             | 3.84 | 1,519.65 |

|     |      |                                                                          |                                                                     |           |         |   |   |    |       |        |                                         |          |
|-----|------|--------------------------------------------------------------------------|---------------------------------------------------------------------|-----------|---------|---|---|----|-------|--------|-----------------------------------------|----------|
| ATP | 6006 | Mannose-6-phosphate receptor (cation dependent)                          | gi 111308551.gi 119936494.gi 127292.gi 28461185                     | 31,183.50 | 100.00% | 5 | 8 | 11 | 0.12% | 19.70% | GVGDDQ 2.75<br>LGESEEE<br>RDDHLL<br>PM  | 2,357.02 |
| ATP | 6006 | Mannose-6-phosphate receptor (cation dependent)                          | gi 111308551.gi 119936494.gi 127292.gi 28461185                     | 31,183.50 | 100.00% | 5 | 8 | 11 | 0.12% | 19.70% | HTLADN 4.5<br>FNPVSEER                  | 1,628.77 |
| ATP | 6006 | Mannose-6-phosphate receptor (cation dependent)                          | gi 111308551.gi 119936494.gi 127292.gi 28461185                     | 31,183.50 | 100.00% | 5 | 8 | 11 | 0.12% | 19.70% | HTLADN 3.84<br>FNPVSEER<br>RGK          | 1,813.88 |
| ATP | 6006 | Mannose-6-phosphate receptor (cation dependent)                          | gi 111308551.gi 119936494.gi 127292.gi 28461185                     | 31,183.50 | 100.00% | 5 | 8 | 11 | 0.12% | 19.70% | SFESTVG 3.7<br>QSPDMY<br>SYVFR          | 2,115.93 |
| ATP | 6006 | Plasminogen activator, urokinase receptor                                | gi 148745533.gi 157279223.gi 163803.gi 27806067.gi 465002.gi 545771 | 35,970.10 | 99.80%  | 2 | 2 | 3  | 0.03% | 6.67%  | GLRNPS 2.68<br>YTIR                     | 1,176.65 |
| ATP | 6006 | Plasminogen activator, urokinase receptor                                | gi 148745533.gi 157279223.gi 163803.gi 27806067.gi 465002.gi 545771 | 35,970.10 | 99.80%  | 2 | 2 | 3  | 0.03% | 6.67%  | SRDQCV 2.93<br>DVITHR                   | 1,428.70 |
| ATP | 6006 | ADP-ribosylation-like factor 6 interacting protein 5                     | gi 59858163.gi 62460474.gi 74354855.gi 75057806                     | 21,648.60 | 99.80%  | 2 | 2 | 3  | 0.03% | 13.80% | FARPDF 1.68<br>R                        | 908.4737 |
| ATP | 6006 | ADP-ribosylation-like factor 6 interacting protein 5                     | gi 59858163.gi 62460474.gi 74354855.gi 75057806                     | 21,648.60 | 99.80%  | 2 | 2 | 3  | 0.03% | 13.80% | TPMGIV 3.78<br>LDALEQ<br>QEETITK        | 2,132.08 |
| ATP | 6006 | Heterogeneous nuclear ribonucleoprotein U (scaffold attachment factor A) | gi 124828988.gi 125991756                                           | 90,435.30 | 100.00% | 4 | 5 | 7  | 0.07% | 10.30% | EKPYFPI 3.67<br>PEDYTFI<br>QNVPLE<br>DR | 2,710.34 |

|     |      |                                                                          |                                                                                                  |           |         |   |   |    |       |        |                                                      |      |          |
|-----|------|--------------------------------------------------------------------------|--------------------------------------------------------------------------------------------------|-----------|---------|---|---|----|-------|--------|------------------------------------------------------|------|----------|
| ATP | 6006 | Heterogeneous nuclear ribonucleoprotein U (scaffold attachment factor A) | gi 124828988,gi 125991756                                                                        | 90,435.30 | 100.00% | 4 | 5 | 7  | 0.07% | 10.30% | KAEVEG<br>KDLPEH<br>AVLK                             | 2.86 | 1,762.97 |
| ATP | 6006 | Heterogeneous nuclear ribonucleoprotein U (scaffold attachment factor A) | gi 124828988,gi 125991756                                                                        | 90,435.30 | 100.00% | 4 | 5 | 7  | 0.07% | 10.30% | LQAALD<br>DEEAGG<br>RPAMEP<br>GNGSLD<br>LGGDSA<br>GR | 6.06 | 3,142.43 |
| ATP | 6006 | Heterogeneous nuclear ribonucleoprotein U (scaffold attachment factor A) | gi 124828988,gi 125991756                                                                        | 90,435.30 | 100.00% | 4 | 5 | 7  | 0.07% | 10.30% | NFILDQT<br>NVSAAA<br>QR                              | 4.22 | 1,647.84 |
| ATP | 6006 | DPYSL3 protein                                                           | gi 154426078,gi 155371867                                                                        | 73,970.90 | 100.00% | 3 | 3 | 3  | 0.03% | 5.99%  | NLHQSG<br>FSLSGTQ<br>VDEGVR                          | 3.31 | 2,030.99 |
| ATP | 6006 | DPYSL3 protein                                                           | gi 154426078,gi 155371867                                                                        | 73,970.90 | 100.00% | 3 | 3 | 3  | 0.03% | 5.99%  | SAADLIS<br>QAR                                       | 3.02 | 1,031.55 |
| ATP | 6006 | DPYSL3 protein                                                           | gi 154426078,gi 155371867                                                                        | 73,970.90 | 100.00% | 3 | 3 | 3  | 0.03% | 5.99%  | TLDFDA<br>LSVGQR                                     | 2.39 | 1,321.67 |
| ATP | 6006 | RecName: Full=ATP synthase subunit beta, mitochondrial; Flags: Precursor | gi 114543,gi 158429023,gi 158429024,gi 158429025,gi 158431069,gi 158431070,gi 158431071,gi 28461 | 51,687.60 | 100.00% | 6 | 9 | 39 | 0.41% | 24.30% | AIAELGI<br>YPAVDP<br>LDSTSR                          | 3.97 | 1,988.03 |
| ATP | 6006 | RecName: Full=ATP synthase subunit beta, mitochondrial; Flags: Precursor | gi 114543,gi 158429023,gi 158429024,gi 158429025,gi 158431069,gi 158431070,gi 158431071,gi 28461 | 51,687.60 | 100.00% | 6 | 9 | 39 | 0.41% | 24.30% | FTQAGS<br>EVSALL<br>GR                               | 3.45 | 1,435.75 |

|     |      |                                                                                                           |                                                                                                                                                         |           |         |   |   |    |       |        |                                                   |          |
|-----|------|-----------------------------------------------------------------------------------------------------------|---------------------------------------------------------------------------------------------------------------------------------------------------------|-----------|---------|---|---|----|-------|--------|---------------------------------------------------|----------|
| ATP | 6006 | RecName<br>:<br>Full=AT<br>P<br>synthase<br>subunit<br>beta,<br>mitochon<br>drial;<br>Flags:<br>Precursor | gi 114543.g<br>i 15842902<br>3,gi 158429<br>024,gi 1584<br>29025,gi 15<br>8431069,gi <br>158431070,<br>gi 1584310<br>71,gi 28461<br>221,gi 9457<br>4271 | 51,687.60 | 100.00% | 6 | 9 | 39 | 0.41% | 24.30% | IVAVIGA 5.2<br>VVDVQF<br>DEGLPPI<br>LNALEV<br>QGR | 3,031.68 |
| ATP | 6006 | RecName<br>:<br>Full=AT<br>P<br>synthase<br>subunit<br>beta,<br>mitochon<br>drial;<br>Flags:<br>Precursor | gi 114543.g<br>i 15842902<br>3,gi 158429<br>024,gi 1584<br>29025,gi 15<br>8431069,gi <br>158431070,<br>gi 1584310<br>71,gi 28461<br>221,gi 9457<br>4271 | 51,687.60 | 100.00% | 6 | 9 | 39 | 0.41% | 24.30% | SLQDIIAI 3.69<br>LGMDEL<br>SEEDKL<br>TVSR         | 2,691.38 |
| ATP | 6006 | RecName<br>:<br>Full=AT<br>P<br>synthase<br>subunit<br>beta,<br>mitochon<br>drial;<br>Flags:<br>Precursor | gi 114543.g<br>i 15842902<br>3,gi 158429<br>024,gi 1584<br>29025,gi 15<br>8431069,gi <br>158431070,<br>gi 1584310<br>71,gi 28461<br>221,gi 9457<br>4271 | 51,687.60 | 100.00% | 6 | 9 | 39 | 0.41% | 24.30% | TIAMDG 2.86<br>TEGLVR                             | 1,278.64 |
| ATP | 6006 | RecName<br>:<br>Full=AT<br>P<br>synthase<br>subunit<br>beta,<br>mitochon<br>drial;<br>Flags:<br>Precursor | gi 114543.g<br>i 15842902<br>3,gi 158429<br>024,gi 1584<br>29025,gi 15<br>8431069,gi <br>158431070,<br>gi 1584310<br>71,gi 28461<br>221,gi 9457<br>4271 | 51,687.60 | 100.00% | 6 | 9 | 39 | 0.41% | 24.30% | VLDSGA 2.78<br>PIRIPVG<br>PETLGR                  | 1,947.10 |
| ATP | 6006 | RecName<br>:<br>Full=Sto<br>matin-<br>like<br>protein 2;<br>Short=SL<br>P-2                               | gi 1185738<br>93,gi 14874<br>5563,gi 816<br>74229,gi 84<br>000113<br>protein 2;<br>Short=SL<br>P-2                                                      | 38,715.70 | 99.80%  | 2 | 2 | 2  | 0.02% | 12.10% | ILEPGLN 2.54<br>ILIPVLD<br>R                      | 1,675.02 |
| ATP | 6006 | RecName<br>:<br>Full=Sto<br>matin-<br>like<br>protein 2;<br>Short=SL<br>P-2                               | gi 1185738<br>93,gi 14874<br>5563,gi 816<br>74229,gi 84<br>000113<br>protein 2;<br>Short=SL<br>P-2                                                      | 38,715.70 | 99.80%  | 2 | 2 | 2  | 0.02% | 12.10% | QAQILAS 3.75<br>EAEKAE<br>QINQAA<br>GEASAV<br>LAK | 2,839.48 |
| ATP | 6006 | SSR1<br>protein                                                                                           | gi 1515536<br>10,gi 15612<br>0891,gi 187<br>611488                                                                                                      | 32,036.80 | 99.80%  | 2 | 2 | 3  | 0.03% | 6.64%  | FLVGFT 2.55<br>NK                                 | 925.5142 |

|     |      |                                        |                                                 |           |         |   |    |    |       |        |                                                |      |          |
|-----|------|----------------------------------------|-------------------------------------------------|-----------|---------|---|----|----|-------|--------|------------------------------------------------|------|----------|
| ATP | 6006 | SSR1 protein                           | gi 151553610,gi 156120891,gi 187611488          | 32,036.80 | 99.80%  | 2 | 2  | 3  | 0.03% | 6.64%  | GEDFPA<br>NNIVK                                | 3.52 | 1,203.60 |
| ATP | 6006 | EH-domain containin g 2                | gi 114051716,gi 86822020                        | 61,201.30 | 100.00% | 6 | 6  | 6  | 0.06% | 17.30% | FGTFHSP<br>ALEDAD<br>FDGKPM<br>VLVAGQ<br>YSTGK | 4.38 | 3,201.52 |
| ATP | 6006 | EH-domain containin g 2                | gi 114051716,gi 86822020                        | 61,201.30 | 100.00% | 6 | 6  | 6  | 0.06% | 17.30% | GYDFPA<br>VLR                                  | 2.55 | 1,037.54 |
| ATP | 6006 | EH-domain containin g 2                | gi 114051716,gi 86822020                        | 61,201.30 | 100.00% | 6 | 6  | 6  | 0.06% | 17.30% | KLNPFG<br>NTFLNR                               | 3.23 | 1,420.77 |
| ATP | 6006 | EH-domain containin g 2                | gi 114051716,gi 86822020                        | 61,201.30 | 100.00% | 6 | 6  | 6  | 0.06% | 17.30% | LFELEEQ<br>DLFRDIQ<br>GLPR                     | 3.16 | 2,218.15 |
| ATP | 6006 | EH-domain containin g 2                | gi 114051716,gi 86822020                        | 61,201.30 | 100.00% | 6 | 6  | 6  | 0.06% | 17.30% | TSFIQYL<br>LEQEVV<br>GSR                       | 3.77 | 1,866.96 |
| ATP | 6006 | EH-domain containin g 2                | gi 114051716,gi 86822020                        | 61,201.30 | 100.00% | 6 | 6  | 6  | 0.06% | 17.30% | VVGTPV<br>VLR                                  | 1.84 | 969.5728 |
| ATP | 6006 | GTP-binding protein MX2                | gi 13430404,gi 27806835,gi 75066885             | 81,436.40 | 100.00% | 3 | 4  | 4  | 0.04% | 8.87%  | ALGVEQ<br>DLALPAI<br>AVIGDQ<br>SSGK            | 4.72 | 2,252.21 |
| ATP | 6006 | GTP-binding protein MX2                | gi 13430404,gi 27806835,gi 75066885             | 81,436.40 | 100.00% | 3 | 4  | 4  | 0.04% | 8.87%  | ATEELQ<br>QYGDDI<br>PSDEGD<br>KMFFLIE<br>K     | 3.53 | 3,034.39 |
| ATP | 6006 | GTP-binding protein MX2                | gi 13430404,gi 27806835,gi 75066885             | 81,436.40 | 100.00% | 3 | 4  | 4  | 0.04% | 8.87%  | SSVLEAL<br>SGVALP<br>R                         | 4.76 | 1,398.80 |
| ATP | 6006 | coiled-coil-helix domain containin g 3 | gi 59858339,gi 62510470,gi 74354006,gi 78365273 | 26,082.40 | 100.00% | 7 | 11 | 11 | 0.12% | 31.70% | ELDAEK<br>AFANEQ<br>LTR                        | 3.4  | 1,734.87 |
| ATP | 6006 | coiled-coil-helix domain containin g 3 | gi 59858339,gi 62510470,gi 74354006,gi 78365273 | 26,082.40 | 100.00% | 7 | 11 | 11 | 0.12% | 31.70% | KQDAFY<br>KEQLAR                               | 3.86 | 1,496.79 |
| ATP | 6006 | coiled-coil-helix domain containin g 3 | gi 59858339,gi 62510470,gi 74354006,gi 78365273 | 26,082.40 | 100.00% | 7 | 11 | 11 | 0.12% | 31.70% | LSENVID<br>RMKETS<br>PSGPK                     | 3    | 2,004.01 |

|     |      |                                                                                                                                     |           |         |    |    |    |       |        |                                        |      |          |
|-----|------|-------------------------------------------------------------------------------------------------------------------------------------|-----------|---------|----|----|----|-------|--------|----------------------------------------|------|----------|
| ATP | 6006 | coiled-coil-helix-9,gi 5985833<br>coiled-coil-helix-70,gi 74354<br>coiled-coil-helix-006,gi 7836<br>domain 5273<br>containin<br>g 3 | 26,082.40 | 100.00% | 7  | 11 | 11 | 0.12% | 31.70% | RVAEEL<br>ALEQAK<br>K                  | 5.07 | 1,484.84 |
| ATP | 6006 | coiled-coil-helix-9,gi 5985833<br>coiled-coil-helix-70,gi 74354<br>coiled-coil-helix-006,gi 7836<br>domain 5273<br>containin<br>g 3 | 26,082.40 | 100.00% | 7  | 11 | 11 | 0.12% | 31.70% | SSEFYK<br>VTTEQY<br>QK                 | 3.04 | 1,737.83 |
| ATP | 6006 | coiled-coil-helix-9,gi 5985833<br>coiled-coil-helix-70,gi 74354<br>coiled-coil-helix-006,gi 7836<br>domain 5273<br>containin<br>g 3 | 26,082.40 | 100.00% | 7  | 11 | 11 | 0.12% | 31.70% | VAEELA<br>LEQAK                        | 3.04 | 1,200.65 |
| ATP | 6006 | coiled-coil-helix-9,gi 5985833<br>coiled-coil-helix-70,gi 74354<br>coiled-coil-helix-006,gi 7836<br>domain 5273<br>containin<br>g 3 | 26,082.40 | 100.00% | 7  | 11 | 11 | 0.12% | 31.70% | VAEELA<br>LEQAKK                       | 3.75 | 1,328.74 |
| ATP | 6006 | integrin beta 1<br>gi 1111831<br>55,gi 21856<br>3327                                                                                | 88,075.70 | 100.00% | 12 | 17 | 30 | 0.32% | 17.50% | GTAEKL<br>QPEDITQ<br>IQPQQLV<br>LQLR   | 4.88 | 2,746.51 |
| ATP | 6006 | integrin beta 1<br>gi 1111831<br>55,gi 21856<br>3327                                                                                | 88,075.70 | 100.00% | 12 | 17 | 30 | 0.32% | 17.50% | IGFGSFV<br>EK                          | 2.56 | 983.5197 |
| ATP | 6006 | integrin beta 1<br>gi 1111831<br>55,gi 21856<br>3327                                                                                | 88,075.70 | 100.00% | 12 | 17 | 30 | 0.32% | 17.50% | LLVFSTD<br>AGFHFA<br>GDGK              | 2.12 | 1,781.89 |
| ATP | 6006 | integrin beta 1<br>gi 1111831<br>55,gi 21856<br>3327                                                                                | 88,075.70 | 100.00% | 12 | 17 | 30 | 0.32% | 17.50% | LPEGVTI<br>NYK                         | 3.22 | 1,133.62 |
| ATP | 6006 | integrin beta 1<br>gi 1111831<br>55,gi 21856<br>3327                                                                                | 88,075.70 | 100.00% | 12 | 17 | 30 | 0.32% | 17.50% | LQPEDIT<br>QIQPQQL<br>VLQLR            | 5.67 | 2,260.27 |
| ATP | 6006 | integrin beta 1<br>gi 1111831<br>55,gi 21856<br>3327                                                                                | 88,075.70 | 100.00% | 12 | 17 | 30 | 0.32% | 17.50% | LSENNIQ<br>TIFAVTE<br>EFQPVY<br>K      | 3.3  | 2,470.25 |
| ATP | 6006 | integrin beta 1<br>gi 1111831<br>55,gi 21856<br>3327                                                                                | 88,075.70 | 100.00% | 12 | 17 | 30 | 0.32% | 17.50% | LSENNIQ<br>TIFAVTE<br>EFQPVY<br>KELK   | 3.95 | 2,840.47 |
| ATP | 6006 | integrin beta 1<br>gi 1111831<br>55,gi 21856<br>3327                                                                                | 88,075.70 | 100.00% | 12 | 17 | 30 | 0.32% | 17.50% | NVLSLT<br>DKGEVF<br>NELVGK             | 4.49 | 1,962.05 |
| ATP | 6006 | integrin beta 1<br>gi 1111831<br>55,gi 21856<br>3327                                                                                | 88,075.70 | 100.00% | 12 | 17 | 30 | 0.32% | 17.50% | SAVTTV<br>VNPKEY<br>GK                 | 3.54 | 1,492.80 |
| ATP | 6006 | integrin beta 1<br>gi 1111831<br>55,gi 21856<br>3327                                                                                | 88,075.70 | 100.00% | 12 | 17 | 30 | 0.32% | 17.50% | SGEPQTF<br>TLK                         | 2.82 | 1,107.57 |
| ATP | 6006 | integrin beta 1<br>gi 1111831<br>55,gi 21856<br>3327                                                                                | 88,075.70 | 100.00% | 12 | 17 | 30 | 0.32% | 17.50% | SKGTAE<br>KLQPEDI<br>TQIQPQQ<br>LVLQLR | 4.09 | 2,961.64 |

|     |      |                                                                                                                                                                                                            |                                                 |           |         |    |    |    |       |        |                            |      |          |
|-----|------|------------------------------------------------------------------------------------------------------------------------------------------------------------------------------------------------------------|-------------------------------------------------|-----------|---------|----|----|----|-------|--------|----------------------------|------|----------|
| ATP | 6006 | integrin<br>beta 1                                                                                                                                                                                         | gi 111183155,gi 218563327                       | 88,075.70 | 100.00% | 12 | 17 | 30 | 0.32% | 17.50% | TVMPYI<br>STTPAK           | 2.99 | 1,324.68 |
| ATP | 6006 | TPM3<br>protein                                                                                                                                                                                            | gi 79153472                                     | 29,015.30 | 100.00% | 3  | 3  | 3  | 0.03% | 19.40% | HIAEEAD<br>RKYEEV<br>AR    | 2.47 | 1,815.90 |
| ATP | 6006 | TPM3<br>protein                                                                                                                                                                                            | gi 79153472                                     | 29,015.30 | 100.00% | 3  | 3  | 3  | 0.03% | 19.40% | KIQVLQ<br>QQADDA<br>EERAER | 3.01 | 2,127.08 |
| ATP | 6006 | TPM3<br>protein                                                                                                                                                                                            | gi 79153472                                     | 29,015.30 | 100.00% | 3  | 3  | 3  | 0.03% | 19.40% | RIQLVEE<br>ELDRAQ<br>ER    | 2.76 | 1,883.99 |
| ATP | 6006 | RecName<br>:<br>Full=Volt<br>age-<br>dependen<br>t anion-<br>selective<br>channel<br>protein 3;<br>Short=V<br>DAC-3;<br>AltName:<br>Full=Out<br>er<br>mitochon<br>drial<br>membran<br>e protein<br>porin 3 | gi 13124452,gi 148878077,gi 27807415,gi 8810224 | 30,853.30 | 100.00% | 7  | 11 | 11 | 0.12% | 27.50% | DVFNKG<br>YGFGMV<br>K      | 1.92 | 1,477.71 |
| ATP | 6006 | RecName<br>:<br>Full=Volt<br>age-<br>dependen<br>t anion-<br>selective<br>channel<br>protein 3;<br>Short=V<br>DAC-3;<br>AltName:<br>Full=Out<br>er<br>mitochon<br>drial<br>membran<br>e protein<br>porin 3 | gi 13124452,gi 148878077,gi 27807415,gi 8810224 | 30,853.30 | 100.00% | 7  | 11 | 11 | 0.12% | 27.50% | LSQNNF<br>ALGYK            | 2.92 | 1,254.65 |



|     |      |                                                                                                                                                                                                                                                                  |           |         |   |    |    |       |        |                             |          |
|-----|------|------------------------------------------------------------------------------------------------------------------------------------------------------------------------------------------------------------------------------------------------------------------|-----------|---------|---|----|----|-------|--------|-----------------------------|----------|
| ATP | 6006 | RecName gi 1312445 :<br>: 2,gi 148878<br>Full=Volt 077,gi 2780<br>age- 7415,gi 881<br>dependen 0224<br>t anion-<br>selective<br>channel<br>protein 3;<br>Short=V<br>DAC-3;<br>AltName:<br>Full=Out<br>er<br>mitochon<br>drial<br>membran<br>e protein<br>porin 3 | 30,853.30 | 100.00% | 7 | 11 | 11 | 0.12% | 27.50% | LTLDTIF 2.99<br>VPNTGK      | 1,418.79 |
| ATP | 6006 | RecName gi 1312445 :<br>: 2,gi 148878<br>Full=Volt 077,gi 2780<br>age- 7415,gi 881<br>dependen 0224<br>t anion-<br>selective<br>channel<br>protein 3;<br>Short=V<br>DAC-3;<br>AltName:<br>Full=Out<br>er<br>mitochon<br>drial<br>membran<br>e protein<br>porin 3 | 30,853.30 | 100.00% | 7 | 11 | 11 | 0.12% | 27.50% | LTLDTIF 3.12<br>VPNTGK<br>K | 1,546.88 |
| ATP | 6006 | RecName gi 1312445 :<br>: 2,gi 148878<br>Full=Volt 077,gi 2780<br>age- 7415,gi 881<br>dependen 0224<br>t anion-<br>selective<br>channel<br>protein 3;<br>Short=V<br>DAC-3;<br>AltName:<br>Full=Out<br>er<br>mitochon<br>drial<br>membran<br>e protein<br>porin 3 | 30,853.30 | 100.00% | 7 | 11 | 11 | 0.12% | 27.50% | LTLSALI 3.09<br>DGK         | 1,030.61 |

|     |      |                                                                                                                                                                                                                                                                |           |         |   |    |    |       |        |                                       |          |
|-----|------|----------------------------------------------------------------------------------------------------------------------------------------------------------------------------------------------------------------------------------------------------------------|-----------|---------|---|----|----|-------|--------|---------------------------------------|----------|
| ATP | 6006 | RecName gi 1312445 :<br>2,gi 148878<br>Full=Volt 077,gi 2780<br>age- 7415,gi 881<br>dependen 0224<br>t anion-<br>selective<br>channel<br>protein 3;<br>Short=V<br>DAC-3;<br>AltName:<br>Full=Out<br>er<br>mitochon<br>drial<br>membran<br>e protein<br>porin 3 | 30,853.30 | 100.00% | 7 | 11 | 11 | 0.12% | 27.50% | LTLSALI 3.31<br>DGKNFN<br>AGGHK       | 1,856.00 |
| ATP | 6006 | RecName gi 1312445 :<br>2,gi 148878<br>Full=Volt 077,gi 2780<br>age- 7415,gi 881<br>dependen 0224<br>t anion-<br>selective<br>channel<br>protein 3;<br>Short=V<br>DAC-3;<br>AltName:<br>Full=Out<br>er<br>mitochon<br>drial<br>membran<br>e protein<br>porin 3 | 30,853.30 | 100.00% | 7 | 11 | 11 | 0.12% | 27.50% | SKLSQN 3.56<br>NFALGY<br>K            | 1,469.77 |
| ATP | 6006 | RecName gi 1312445 :<br>2,gi 148878<br>Full=Volt 077,gi 2780<br>age- 7415,gi 881<br>dependen 0224<br>t anion-<br>selective<br>channel<br>protein 3;<br>Short=V<br>DAC-3;<br>AltName:<br>Full=Out<br>er<br>mitochon<br>drial<br>membran<br>e protein<br>porin 3 | 30,853.30 | 100.00% | 7 | 11 | 11 | 0.12% | 27.50% | VNNASLI 2.93<br>GLGYTQ<br>TLRPGV<br>K | 2,101.18 |
| ATP | 6006 | SLC25A gi 1515560 :<br>3 protein 64                                                                                                                                                                                                                            | 39,986.50 | 100.00% | 4 | 6  | 8  | 0.08% | 11.10% | IQTQPGY 3.98<br>ANTLR                 | 1,361.72 |
| ATP | 6006 | SLC25A gi 1515560 :<br>3 protein 64                                                                                                                                                                                                                            | 39,986.50 | 100.00% | 4 | 6  | 8  | 0.08% | 11.10% | LPRPPPP 4.19<br>EMPESL<br>K           | 1,603.85 |

|     |      |                                                                                      |                                                                                                                    |           |         |   |   |   |       |        |                                               |      |          |
|-----|------|--------------------------------------------------------------------------------------|--------------------------------------------------------------------------------------------------------------------|-----------|---------|---|---|---|-------|--------|-----------------------------------------------|------|----------|
| ATP | 6006 | SLC25A3 protein                                                                      | gi 151556064                                                                                                       | 39,986.50 | 100.00% | 4 | 6 | 8 | 0.08% | 11.10% | MYKEEG<br>LKAFYK                              | 3.87 | 1,522.76 |
| ATP | 6006 | SLC25A3 protein                                                                      | gi 151556064                                                                                                       | 39,986.50 | 100.00% | 4 | 6 | 8 | 0.08% | 11.10% | VRIQTQP<br>GYANTL<br>R                        | 3.62 | 1,616.89 |
| ATP | 6006 | Mitogen-activated protein kinase 1 interacting protein 1                             | gi 109658269,gi 115496109,gi 122133616                                                                             | 13,632.00 | 99.80%  | 2 | 2 | 2 | 0.02% | 41.10% | KLPSVE<br>GLHAIV<br>VSDRDG<br>VPVIK           | 2.48 | 2,428.39 |
| ATP | 6006 | Mitogen-activated protein kinase 1 interacting protein 1                             | gi 109658269,gi 115496109,gi 122133616                                                                             | 13,632.00 | 99.80%  | 2 | 2 | 2 | 0.02% | 41.10% | VANDNA<br>PEHALR<br>PGFLSTF<br>ALATDQ<br>GSK  | 3.24 | 2,927.46 |
| ATP | 6006 | tyrosine monoxygenase/tryptophan 5-monoxygenase activation protein, zeta polypeptide | 3-gi 27807367,gi 4557908,gi 4557913,gi 4557914,gi 4557915,gi 4557916,gi 4930273,gi 4930274,gi 52000886,gi 73587275 | 27,727.90 | 100.00% | 3 | 3 | 3 | 0.03% | 24.10% | LAEQAE<br>RYDDM<br>AACMK                      | 4.23 | 1,860.79 |
| ATP | 6006 | tyrosine monoxygenase/tryptophan 5-monoxygenase activation protein, zeta polypeptide | 3-gi 27807367,gi 4557908,gi 4557913,gi 4557914,gi 4557915,gi 4557916,gi 4930273,gi 4930274,gi 52000886,gi 73587275 | 27,727.90 | 100.00% | 3 | 3 | 3 | 0.03% | 24.10% | SVTEQG<br>AELSNE<br>ER                        | 4.08 | 1,548.71 |
| ATP | 6006 | tyrosine monoxygenase/tryptophan 5-monoxygenase activation protein, zeta polypeptide | 3-gi 27807367,gi 4557908,gi 4557913,gi 4557914,gi 4557915,gi 4557916,gi 4930273,gi 4930274,gi 52000886,gi 73587275 | 27,727.90 | 100.00% | 3 | 3 | 3 | 0.03% | 24.10% | TAFDEAI<br>AELDTL<br>SEESYK<br>DSTLIM<br>QLLR | 4.19 | 3,318.63 |
| ATP | 6006 | PREDICTED: similar to ribosomal protein L7                                           | gi 119919984,gi 61553181,gi 62460552,gi 71649267                                                                   | 29,152.80 | 100.00% | 4 | 4 | 4 | 0.04% | 16.90% | IALTDNA<br>LIAR                               | 3.75 | 1,170.68 |

|     |      |                                                |            |           |         |   |   |   |       |        |                                  |      |          |
|-----|------|------------------------------------------------|------------|-----------|---------|---|---|---|-------|--------|----------------------------------|------|----------|
| ATP | 6006 | PREDIC TED: similar to ribosomal protein L7    | gi 1199199 | 29,152.80 | 100.00% | 4 | 4 | 4 | 0.04% | 16.90% | KTTHFV<br>EGGDAG<br>NREDQI<br>NR | 2.92 | 2,244.08 |
| ATP | 6006 | PREDIC TED: similar to ribosomal protein L7    | gi 1199199 | 29,152.80 | 100.00% | 4 | 4 | 4 | 0.04% | 16.90% | KVPAVP<br>ETLKK                  | 3.13 | 1,209.76 |
| ATP | 6006 | PREDIC TED: similar to ribosomal protein L7    | gi 1199199 | 29,152.80 | 100.00% | 4 | 4 | 4 | 0.04% | 16.90% | TTHFVE<br>GGDAGN<br>REDQIN<br>R  | 2.51 | 2,115.98 |
| ATP | 6006 | 90-kDa heat shock protein alpha                | gi 3439234 | 84,716.20 | 100.00% | 3 | 3 | 3 | 0.03% | 9.41%  | ADLINNL<br>GTIAK                 | 3.2  | 1,242.71 |
| ATP | 6006 | 90-kDa heat shock protein alpha                | gi 3439234 | 84,716.20 | 100.00% | 3 | 3 | 3 | 0.03% | 9.41%  | GVVDSE<br>DLPLNIS<br>R           | 4.44 | 1,513.79 |
| ATP | 6006 | 90-kDa heat shock protein alpha                | gi 3439234 | 84,716.20 | 100.00% | 3 | 3 | 3 | 0.03% | 9.41%  | HLEINPD<br>HSIETL<br>R           | 2.97 | 1,786.94 |
| ATP | 6006 | 90-kDa heat shock protein alpha                | gi 3439234 | 84,716.20 | 100.00% | 3 | 3 | 3 | 0.03% | 9.41%  | NPDDITN<br>EEYGEF<br>YK          | 3.2  | 1,833.78 |
| ATP | 6006 | 90-kDa heat shock protein alpha                | gi 3439234 | 84,716.20 | 100.00% | 3 | 3 | 3 | 0.03% | 9.41%  | TLTIVDT<br>GIGMTK                | 3.76 | 1,365.73 |
| ATP | 6006 | PREDIC TED: similar to histone cluster 1, H2bd | gi 1199157 | 13,888.60 | 100.00% | 3 | 3 | 4 | 0.04% | 20.60% | KESYSV<br>YVYK                   | 2.66 | 1,265.64 |
| ATP | 6006 | PREDIC TED: similar to histone cluster 1, H2bd | gi 1199157 | 13,888.60 | 100.00% | 3 | 3 | 4 | 0.04% | 20.60% | SRKESY<br>SVYVYK                 | 4.5  | 1,508.77 |
| ATP | 6006 | PREDIC TED: similar to histone cluster 1, H2bd | gi 1199157 | 13,888.60 | 100.00% | 3 | 3 | 4 | 0.04% | 20.60% | VLKQVH<br>PDTGISS<br>K           | 3.7  | 1,508.84 |
| ATP | 6006 | pyruvate kinase 3                              | gi 1462317 | 61,410.20 | 99.80%  | 2 | 2 | 2 | 0.02% | 4.42%  | IISKIENH<br>EGVR                 | 2.48 | 1,394.78 |

|     |      |                                                                                         |                                       |           |         |   |    |    |       |        |                             |      |          |
|-----|------|-----------------------------------------------------------------------------------------|---------------------------------------|-----------|---------|---|----|----|-------|--------|-----------------------------|------|----------|
| ATP | 6006 | pyruvate kinase 3                                                                       | gi 146231736,gi 194670470,gi 73587283 | 61,410.20 | 99.80%  | 2 | 2  | 2  | 0.02% | 4.42%  | IYVDDG<br>LISLLVK           | 3.26 | 1,447.84 |
| ATP | 6006 | guanine nucleotide binding protein (G protein), alpha inhibiting activity polypeptide 2 | gi 198282135                          | 40,460.10 | 100.00% | 8 | 13 | 26 | 0.27% | 25.60% | AMGNLQ<br>IDFADPS<br>R      | 3.88 | 1,550.73 |
| ATP | 6006 | guanine nucleotide binding protein (G protein), alpha inhibiting activity polypeptide 2 | gi 198282135                          | 40,460.10 | 100.00% | 8 | 13 | 26 | 0.27% | 25.60% | AMGNLQ<br>IDFADPS<br>RADDAR | 3.16 | 2,078.96 |
| ATP | 6006 | guanine nucleotide binding protein (G protein), alpha inhibiting activity polypeptide 2 | gi 198282135                          | 40,460.10 | 100.00% | 8 | 13 | 26 | 0.27% | 25.60% | AVVYSN<br>TIQSIMA<br>IVK    | 4.17 | 1,736.96 |
| ATP | 6006 | guanine nucleotide binding protein (G protein), alpha inhibiting activity polypeptide 2 | gi 198282135                          | 40,460.10 | 100.00% | 8 | 13 | 26 | 0.27% | 25.60% | EYQLND<br>SAAYYL<br>NDLER   | 4.09 | 2,076.95 |
| ATP | 6006 | guanine nucleotide binding protein (G protein), alpha inhibiting activity polypeptide 2 | gi 198282135                          | 40,460.10 | 100.00% | 8 | 13 | 26 | 0.27% | 25.60% | IAQSDYI<br>PTQQDV<br>LR     | 3.78 | 1,746.90 |
| ATP | 6006 | guanine nucleotide binding protein (G protein), alpha inhibiting activity polypeptide 2 | gi 198282135                          | 40,460.10 | 100.00% | 8 | 13 | 26 | 0.27% | 25.60% | LLLLGA<br>GESGK             | 3.7  | 1,057.63 |

|     |      |                                                                                         |                                              |            |         |   |    |    |       |        |                                 |      |          |
|-----|------|-----------------------------------------------------------------------------------------|----------------------------------------------|------------|---------|---|----|----|-------|--------|---------------------------------|------|----------|
| ATP | 6006 | guanine nucleotide binding protein (G protein), alpha inhibiting activity polypeptide 2 | gi 198282135                                 | 40,460.10  | 100.00% | 8 | 13 | 26 | 0.27% | 25.60% | SREYQL<br>NDSAAY<br>YLNDLE<br>R | 4.24 | 2,320.08 |
| ATP | 6006 | guanine nucleotide binding protein (G protein), alpha inhibiting activity polypeptide 2 | gi 198282135                                 | 40,460.10  | 100.00% | 8 | 13 | 26 | 0.27% | 25.60% | YDEAAS<br>YIQSK                 | 2.73 | 1,274.59 |
| ATP | 6006 | FOLH1 protein                                                                           | gi 151553958,gi 156120365                    | 84,574.90  | 100.00% | 4 | 4  | 4  | 0.04% | 6.93%  | AFTDPL<br>GLPDRPF<br>YR         | 1.92 | 1,764.91 |
| ATP | 6006 | FOLH1 protein                                                                           | gi 151553958,gi 156120365                    | 84,574.90  | 100.00% | 4 | 4  | 4  | 0.04% | 6.93%  | IPHLAGT<br>EQNFQL<br>AK         | 3.97 | 1,666.89 |
| ATP | 6006 | FOLH1 protein                                                                           | gi 151553958,gi 156120365                    | 84,574.90  | 100.00% | 4 | 4  | 4  | 0.04% | 6.93%  | IYNVIGT<br>LR                   | 3.17 | 1,048.62 |
| ATP | 6006 | FOLH1 protein                                                                           | gi 151553958,gi 156120365                    | 84,574.90  | 100.00% | 4 | 4  | 4  | 0.04% | 6.93%  | LQDLDK<br>NNPILLR               | 2.67 | 1,551.89 |
| ATP | 6006 | TEK tyrosine kinase, endothelial                                                        | gi 113912159,gi 27806791,gi 296578,gi 730946 | 125,911.60 | 99.80%  | 2 | 2  | 2  | 0.02% | 2.13%  | NILVGE<br>NYVAK                 | 2.75 | 1,219.67 |
| ATP | 6006 | TEK tyrosine kinase, endothelial                                                        | gi 113912159,gi 27806791,gi 296578,gi 730946 | 125,911.60 | 99.80%  | 2 | 2  | 2  | 0.02% | 2.13%  | YIGGNLF<br>TSAFTR               | 2.68 | 1,446.74 |
| ATP | 6006 | Na/K-ATPase beta 1 subunit [synthetic construct]                                        | gi 22094876                                  | 35,156.20  | 100.00% | 3 | 3  | 5  | 0.05% | 9.54%  | SYMITYV<br>DNIDNFL<br>K         | 2.35 | 1,738.80 |
| ATP | 6006 | Na/K-ATPase beta 1 subunit [synthetic construct]                                        | gi 22094876                                  | 35,156.20  | 100.00% | 3 | 3  | 5  | 0.05% | 9.54%  | SYMITYV<br>DNIDNFL<br>KK        | 2.67 | 1,866.89 |
| ATP | 6006 | Na/K-ATPase beta 1 subunit [synthetic construct]                                        | gi 22094876                                  | 35,156.20  | 100.00% | 3 | 3  | 5  | 0.05% | 9.54%  | VAPPGL<br>TQIPQIQ<br>K          | 2.19 | 1,489.87 |
| ATP | 6006 | plastin 3                                                                               | gi 152941116                                 | 70,782.90  | 99.80%  | 2 | 2  | 2  | 0.02% | 3.97%  | AYFHLL<br>NQIAPK                | 3.21 | 1,414.78 |
| ATP | 6006 | plastin 3                                                                               | gi 152941116                                 | 70,782.90  | 99.80%  | 2 | 2  | 2  | 0.02% | 3.97%  | MINLSVP<br>DTIDER               | 2.88 | 1,518.75 |

|     |      |                                                                                                             |                                                  |           |         |   |   |   |       |        |                          |      |          |
|-----|------|-------------------------------------------------------------------------------------------------------------|--------------------------------------------------|-----------|---------|---|---|---|-------|--------|--------------------------|------|----------|
| ATP | 6006 | RecName<br>:<br>Full=Ann<br>exin A3;<br>AltName:<br>Full=Ann<br>exin-3;<br>AltName:<br>Full=Ann<br>exin III | gi 1152998<br>47.gi 74356<br>332.gi 7836<br>9184 | 36,125.00 | 100.00% | 6 | 7 | 7 | 0.07% | 19.50% | GAGTDE<br>FTLNR          | 3.38 | 1,180.56 |
| ATP | 6006 | RecName<br>:<br>Full=Ann<br>exin A3;<br>AltName:<br>Full=Ann<br>exin-3;<br>AltName:<br>Full=Ann<br>exin III | gi 1152998<br>47.gi 74356<br>332.gi 7836<br>9184 | 36,125.00 | 100.00% | 6 | 7 | 7 | 0.07% | 19.50% | GIGTDE<br>KTLISILT<br>ER | 4.18 | 1,745.96 |
| ATP | 6006 | RecName<br>:<br>Full=Ann<br>exin A3;<br>AltName:<br>Full=Ann<br>exin-3;<br>AltName:<br>Full=Ann<br>exin III | gi 1152998<br>47.gi 74356<br>332.gi 7836<br>9184 | 36,125.00 | 100.00% | 6 | 7 | 7 | 0.07% | 19.50% | LSGYSL<br>YSAIK          | 3.02 | 1,201.65 |
| ATP | 6006 | RecName<br>:<br>Full=Ann<br>exin A3;<br>AltName:<br>Full=Ann<br>exin-3;<br>AltName:<br>Full=Ann<br>exin III | gi 1152998<br>47.gi 74356<br>332.gi 7836<br>9184 | 36,125.00 | 100.00% | 6 | 7 | 7 | 0.07% | 19.50% | SEIDLLD<br>IR            | 2.95 | 1,073.58 |
| ATP | 6006 | RecName<br>:<br>Full=Ann<br>exin A3;<br>AltName:<br>Full=Ann<br>exin-3;<br>AltName:<br>Full=Ann<br>exin III | gi 1152998<br>47.gi 74356<br>332.gi 7836<br>9184 | 36,125.00 | 100.00% | 6 | 7 | 7 | 0.07% | 19.50% | SLGDEIS<br>SETSGDF<br>RK | 2.44 | 1,727.81 |

|     |      |                                                                                                                            |            |         |   |   |   |       |        |                                      |          |
|-----|------|----------------------------------------------------------------------------------------------------------------------------|------------|---------|---|---|---|-------|--------|--------------------------------------|----------|
| ATP | 6006 | RecName : gi 1152998 : 47,gi 74356 Full=Ann 332,gi 7836 exin A3; 9184 AltName: Full=Ann exin-3; AltName: Full=Ann exin III | 36,125.00  | 100.00% | 6 | 7 | 7 | 0.07% | 19.50% | TLISILTE 2.57 R                      | 1,045.63 |
| ATP | 6006 | Catenin (cadherin-24,gi 11549 associate 7488,gi 122 d 145603,gi 1 protein), beta 1, 88kDa                                  | 85,493.00  | 100.00% | 7 | 8 | 9 | 0.09% | 14.50% | GLNTIPL 4.6 FVQLLY SPIENIQ R         | 2,428.36 |
| ATP | 6006 | Catenin (cadherin-24,gi 11549 associate 7488,gi 122 d 145603,gi 1 protein), beta 1, 88kDa                                  | 85,493.00  | 100.00% | 7 | 8 | 9 | 0.09% | 14.50% | HAVVNL 4.61 INYQDD AELATR            | 2,042.03 |
| ATP | 6006 | Catenin (cadherin-24,gi 11549 associate 7488,gi 122 d 145603,gi 1 protein), beta 1, 88kDa                                  | 85,493.00  | 100.00% | 7 | 8 | 9 | 0.09% | 14.50% | LHYGLP 2.91 VVVK                     | 1,124.68 |
| ATP | 6006 | Catenin (cadherin-24,gi 11549 associate 7488,gi 122 d 145603,gi 1 protein), beta 1, 88kDa                                  | 85,493.00  | 100.00% | 7 | 8 | 9 | 0.09% | 14.50% | LILASG 2.75 GPQALV NIMR              | 1,782.03 |
| ATP | 6006 | Catenin (cadherin-24,gi 11549 associate 7488,gi 122 d 145603,gi 1 protein), beta 1, 88kDa                                  | 85,493.00  | 100.00% | 7 | 8 | 9 | 0.09% | 14.50% | LLNDED 2.98 QVVVNK                   | 1,385.73 |
| ATP | 6006 | Catenin (cadherin-24,gi 11549 associate 7488,gi 122 d 145603,gi 1 protein), beta 1, 88kDa                                  | 85,493.00  | 100.00% | 7 | 8 | 9 | 0.09% | 14.50% | LVQLLV 2.23 R                        | 840.5666 |
| ATP | 6006 | Catenin (cadherin-24,gi 11549 associate 7488,gi 122 d 145603,gi 1 protein), beta 1, 88kDa                                  | 85,493.00  | 100.00% | 7 | 8 | 9 | 0.09% | 14.50% | MLGSPV 4.07 DSVLFY AITLHN LLLHQE GAK | 3,083.62 |
| ATP | 6006 | PREDICTED: gi 1946697 : 78 collagen, type XII, alpha 1 isoform 1                                                           | 351,243.80 | 100.00% | 5 | 5 | 5 | 0.05% | 2.48%  | GLTSSEP 3.26 VSIMEK                  | 1,393.69 |



|     |      |                                                              |                                                                                                                  |            |         |   |   |   |       |        |                           |      |          |
|-----|------|--------------------------------------------------------------|------------------------------------------------------------------------------------------------------------------|------------|---------|---|---|---|-------|--------|---------------------------|------|----------|
| ATP | 6006 | PREDIC TED: collagen, type XII, alpha 1 isoform 1            | gi 194669778                                                                                                     | 351,243.80 | 100.00% | 5 | 5 | 5 | 0.05% | 2.48%  | GPGDLE APSNLV LSER        | 3.44 | 1,653.84 |
| ATP | 6006 | PREDIC TED: collagen, type XII, alpha 1 isoform 1            | gi 194669778                                                                                                     | 351,243.80 | 100.00% | 5 | 5 | 5 | 0.05% | 2.48%  | IIYSPTV GDPIDEY TTVPGR R  | 2.67 | 2,349.21 |
| ATP | 6006 | PREDIC TED: collagen, type XII, alpha 1 isoform 1            | gi 194669778                                                                                                     | 351,243.80 | 100.00% | 5 | 5 | 5 | 0.05% | 2.48%  | ITYQPST GEGNEQ TTTIGGR    | 3.22 | 2,110.01 |
| ATP | 6006 | PREDIC TED: collagen, type XII, alpha 1 isoform 1            | gi 194669778                                                                                                     | 351,243.80 | 100.00% | 5 | 5 | 5 | 0.05% | 2.48%  | IVEVFEI GPK               | 2.59 | 1,130.65 |
| ATP | 6006 | V-ral simian leukemia viral oncogene homolog A (ras related) | gi 73586513,gi 77736231,gi 95768203                                                                              | 23,522.20  | 100.00% | 3 | 4 | 4 | 0.04% | 14.10% | ANVDKV FFDLMR             | 4.1  | 1,470.74 |
| ATP | 6006 | V-ral simian leukemia viral oncogene homolog A (ras related) | gi 73586513,gi 77736231,gi 95768203                                                                              | 23,522.20  | 100.00% | 3 | 4 | 4 | 0.04% | 14.10% | TRANVD KVFFDL MR          | 2.88 | 1,727.89 |
| ATP | 6006 | V-ral simian leukemia viral oncogene homolog A (ras related) | gi 73586513,gi 77736231,gi 95768203                                                                              | 23,522.20  | 100.00% | 3 | 4 | 4 | 0.04% | 14.10% | VKEDEN VPFLLV GNK         | 3.24 | 1,700.92 |
| ATP | 6006 | ALDOA protein                                                | gi 151554749,gi 156120479                                                                                        | 39,418.80  | 99.80%  | 2 | 2 | 2 | 0.02% | 7.97%  | GILAADE STGSIK            | 2.8  | 1,332.70 |
| ATP | 6006 | ALDOA protein                                                | gi 151554749,gi 156120479                                                                                        | 39,418.80  | 99.80%  | 2 | 2 | 2 | 0.02% | 7.97%  | RLQSIGT ENTEEN RR         | 3.15 | 1,802.91 |
| ATP | 6006 | hemoglobin alpha chain                                       | gi 116812902,gi 126717493,gi 13634094,gi 194678485,gi 197724899,gi 197724901,gi 197724903,gi 6006421,gi 74268120 | 15,035.40  | 100.00% | 5 | 5 | 7 | 0.07% | 52.50% | AVEHLD DLPGAL SELSDLH AHK | 4.15 | 2,367.19 |

|     |      |                                                                                                                    |                                                                                                                                                          |           |         |   |   |   |       |        |                           |      |          |
|-----|------|--------------------------------------------------------------------------------------------------------------------|----------------------------------------------------------------------------------------------------------------------------------------------------------|-----------|---------|---|---|---|-------|--------|---------------------------|------|----------|
| ATP | 6006 | hemoglob<br>in alpha<br>chain                                                                                      | gi 1168129<br>02,gi 12671<br>7493,gi 136<br>34094,gi 19<br>4678485,gi <br>197724899,<br>gi 1977249<br>01,gi 19772<br>4903,gi 600<br>6421,gi 742<br>68120 | 15,035.40 | 100.00% | 5 | 5 | 7 | 0.07% | 52.50% | FLANVS<br>TVLTSK          | 3.53 | 1,279.73 |
| ATP | 6006 | hemoglob<br>in alpha<br>chain                                                                                      | gi 1168129<br>02,gi 12671<br>7493,gi 136<br>34094,gi 19<br>4678485,gi <br>197724899,<br>gi 1977249<br>01,gi 19772<br>4903,gi 600<br>6421,gi 742<br>68120 | 15,035.40 | 100.00% | 5 | 5 | 7 | 0.07% | 52.50% | MFLSFPT<br>TK             | 2.01 | 1,087.55 |
| ATP | 6006 | hemoglob<br>in alpha<br>chain                                                                                      | gi 1168129<br>02,gi 12671<br>7493,gi 136<br>34094,gi 19<br>4678485,gi <br>197724899,<br>gi 1977249<br>01,gi 19772<br>4903,gi 600<br>6421,gi 742<br>68120 | 15,035.40 | 100.00% | 5 | 5 | 7 | 0.07% | 52.50% | TYFPHF<br>DLSHGS<br>AQVK  | 2.59 | 1,833.89 |
| ATP | 6006 | hemoglob<br>in alpha<br>chain                                                                                      | gi 1168129<br>02,gi 12671<br>7493,gi 136<br>34094,gi 19<br>4678485,gi <br>197724899,<br>gi 1977249<br>01,gi 19772<br>4903,gi 600<br>6421,gi 742<br>68120 | 15,035.40 | 100.00% | 5 | 5 | 7 | 0.07% | 52.50% | VGGHAA<br>EYGAEA<br>LER   | 4.21 | 1,529.73 |
| ATP | 6006 | RecName<br>:<br>Full=Tra<br>nsmembr<br>ane<br>emp24<br>domain-<br>containin<br>g protein<br>1; Flags:<br>Precursor | gi 1141522<br>89,gi 83638<br>714,gi 8437<br>0158                                                                                                         | 25,119.90 | 99.80%  | 2 | 2 | 2 | 0.02% | 11.50% | KADGVH<br>TVEPTE<br>AGDYK | 3.64 | 1,816.87 |

|     |      |                                                                                                                 |                                                                                                                              |           |         |    |    |    |       |        |                                 |      |          |
|-----|------|-----------------------------------------------------------------------------------------------------------------|------------------------------------------------------------------------------------------------------------------------------|-----------|---------|----|----|----|-------|--------|---------------------------------|------|----------|
| ATP | 6006 | RecName :<br>Full=Tra<br>nsmembr<br>ane<br>emp24<br>domain-<br>containin<br>g protein<br>1; Flags:<br>Precursor | gi 1141522<br>89,gi 83638<br>714,gi 8437<br>0158                                                                             | 25,119.90 | 99.80%  | 2  | 2  | 2  | 0.02% | 11.50% | SIQVLTL<br>LR                   | 3.06 | 1,042.66 |
| ATP | 6006 | unnamed<br>protein<br>product                                                                                   | gi 1102924<br>44,gi 13519<br>07,gi 14874<br>4077,gi 162<br>648,gi 2190<br>337,gi 2330<br>7791,gi 307<br>94280,gi 33<br>36842 | 69,296.20 | 100.00% | 13 | 17 | 39 | 0.41% | 20.30% | ATEEQL<br>KTVMEN<br>FVAFVD<br>K | 4.06 | 2,215.10 |
| ATP | 6006 | unnamed<br>protein<br>product                                                                                   | gi 1102924<br>44,gi 13519<br>07,gi 14874<br>4077,gi 162<br>648,gi 2190<br>337,gi 2330<br>7791,gi 307<br>94280,gi 33<br>36842 | 69,296.20 | 100.00% | 13 | 17 | 39 | 0.41% | 20.30% | DAFLGS<br>FLYEYS<br>R           | 2.89 | 1,567.74 |
| ATP | 6006 | unnamed<br>protein<br>product                                                                                   | gi 1102924<br>44,gi 13519<br>07,gi 14874<br>4077,gi 162<br>648,gi 2190<br>337,gi 2330<br>7791,gi 307<br>94280,gi 33<br>36842 | 69,296.20 | 100.00% | 13 | 17 | 39 | 0.41% | 20.30% | FKDLGE<br>EHFK                  | 4.13 | 1,249.62 |
| ATP | 6006 | unnamed<br>protein<br>product                                                                                   | gi 1102924<br>44,gi 13519<br>07,gi 14874<br>4077,gi 162<br>648,gi 2190<br>337,gi 2330<br>7791,gi 307<br>94280,gi 33<br>36842 | 69,296.20 | 100.00% | 13 | 17 | 39 | 0.41% | 20.30% | HLVDEP<br>QNLIK                 | 3.3  | 1,305.72 |
| ATP | 6006 | unnamed<br>protein<br>product                                                                                   | gi 1102924<br>44,gi 13519<br>07,gi 14874<br>4077,gi 162<br>648,gi 2190<br>337,gi 2330<br>7791,gi 307<br>94280,gi 33<br>36842 | 69,296.20 | 100.00% | 13 | 17 | 39 | 0.41% | 20.30% | KQTALV<br>ELLK                  | 4.18 | 1,142.71 |

|     |      |                               |                                                                                                                              |           |         |    |    |    |       |        |                          |      |          |
|-----|------|-------------------------------|------------------------------------------------------------------------------------------------------------------------------|-----------|---------|----|----|----|-------|--------|--------------------------|------|----------|
| ATP | 6006 | unnamed<br>protein<br>product | gi 1102924<br>44,gi 13519<br>07,gi 14874<br>4077,gi 162<br>648,gi 2190<br>337,gi 2330<br>7791,gi 307<br>94280,gi 33<br>36842 | 69,296.20 | 100.00% | 13 | 17 | 39 | 0.41% | 20.30% | KVPQVS<br>TPTLVE<br>VSR  | 4.38 | 1,639.94 |
| ATP | 6006 | unnamed<br>protein<br>product | gi 1102924<br>44,gi 13519<br>07,gi 14874<br>4077,gi 162<br>648,gi 2190<br>337,gi 2330<br>7791,gi 307<br>94280,gi 33<br>36842 | 69,296.20 | 100.00% | 13 | 17 | 39 | 0.41% | 20.30% | LVNELT<br>EFAK           | 2.93 | 1,163.63 |
| ATP | 6006 | unnamed<br>protein<br>product | gi 1102924<br>44,gi 13519<br>07,gi 14874<br>4077,gi 162<br>648,gi 2190<br>337,gi 2330<br>7791,gi 307<br>94280,gi 33<br>36842 | 69,296.20 | 100.00% | 13 | 17 | 39 | 0.41% | 20.30% | QTALVE<br>LLK            | 1.94 | 1,014.62 |
| ATP | 6006 | unnamed<br>protein<br>product | gi 1102924<br>44,gi 13519<br>07,gi 14874<br>4077,gi 162<br>648,gi 2190<br>337,gi 2330<br>7791,gi 307<br>94280,gi 33<br>36842 | 69,296.20 | 100.00% | 13 | 17 | 39 | 0.41% | 20.30% | RHPEYA<br>VSVLLR         | 4.26 | 1,439.81 |
| ATP | 6006 | unnamed<br>protein<br>product | gi 1102924<br>44,gi 13519<br>07,gi 14874<br>4077,gi 162<br>648,gi 2190<br>337,gi 2330<br>7791,gi 307<br>94280,gi 33<br>36842 | 69,296.20 | 100.00% | 13 | 17 | 39 | 0.41% | 20.30% | RHPYFY<br>APELly<br>YANK | 4.11 | 2,045.03 |
| ATP | 6006 | unnamed<br>protein<br>product | gi 1102924<br>44,gi 13519<br>07,gi 14874<br>4077,gi 162<br>648,gi 2190<br>337,gi 2330<br>7791,gi 307<br>94280,gi 33<br>36842 | 69,296.20 | 100.00% | 13 | 17 | 39 | 0.41% | 20.30% | TVMENF<br>VAFVDK         | 2.95 | 1,415.69 |
| ATP | 6006 | unnamed<br>protein<br>product | gi 1102924<br>44,gi 13519<br>07,gi 14874<br>4077,gi 162<br>648,gi 2190<br>337,gi 2330<br>7791,gi 307<br>94280,gi 33<br>36842 | 69,296.20 | 100.00% | 13 | 17 | 39 | 0.41% | 20.30% | VPQVST<br>PTLVEV<br>SR   | 2.88 | 1,511.84 |

|     |      |                                                      |                                                                                              |           |         |    |    |    |       |        |                                 |          |
|-----|------|------------------------------------------------------|----------------------------------------------------------------------------------------------|-----------|---------|----|----|----|-------|--------|---------------------------------|----------|
| ATP | 6006 | unnamed protein product                              | gi 110292444,gi 1351907,gi 148744077,gi 162648,gi 2190337,gi 23307791,gi 30794280,gi 3336842 | 69,296.20 | 100.00% | 13 | 17 | 39 | 0.41% | 20.30% | YLYEIAR 2.7                     | 927.4934 |
| ATP | 6006 | polymerase I and transcript release factor isoform 2 | gi 162287374                                                                                 | 43,446.30 | 100.00% | 10 | 13 | 13 | 0.14% | 24.10% | IIGAVDQ 4.02<br>IQLTQA<br>QLEER | 2,025.10 |
| ATP | 6006 | polymerase I and transcript release factor isoform 2 | gi 162287374                                                                                 | 43,446.30 | 100.00% | 10 | 13 | 13 | 0.14% | 24.10% | IREGQVE 4.09<br>VLK             | 1,170.68 |
| ATP | 6006 | polymerase I and transcript release factor isoform 2 | gi 162287374                                                                                 | 43,446.30 | 100.00% | 10 | 13 | 13 | 0.14% | 24.10% | KLEVNE 3.62<br>AELLR            | 1,313.74 |
| ATP | 6006 | polymerase I and transcript release factor isoform 2 | gi 162287374                                                                                 | 43,446.30 | 100.00% | 10 | 13 | 13 | 0.14% | 24.10% | KLEVNE 2.38<br>AELLRR           | 1,469.84 |
| ATP | 6006 | polymerase I and transcript release factor isoform 2 | gi 162287374                                                                                 | 43,446.30 | 100.00% | 10 | 13 | 13 | 0.14% | 24.10% | KSFTPD 3.21<br>HVYAR            | 1,419.74 |
| ATP | 6006 | polymerase I and transcript release factor isoform 2 | gi 162287374                                                                                 | 43,446.30 | 100.00% | 10 | 13 | 13 | 0.14% | 24.10% | LEVNEA 3.03<br>ELLR             | 1,185.65 |
| ATP | 6006 | polymerase I and transcript release factor isoform 2 | gi 162287374                                                                                 | 43,446.30 | 100.00% | 10 | 13 | 13 | 0.14% | 24.10% | NFKVMI 2.09<br>YQDEVK<br>LPAK   | 1,939.04 |
| ATP | 6006 | polymerase I and transcript release factor isoform 2 | gi 162287374                                                                                 | 43,446.30 | 100.00% | 10 | 13 | 13 | 0.14% | 24.10% | QAEMEG 4.49<br>AVQSIQ<br>GELSK  | 1,820.87 |
| ATP | 6006 | polymerase I and transcript release factor isoform 2 | gi 162287374                                                                                 | 43,446.30 | 100.00% | 10 | 13 | 13 | 0.14% | 24.10% | VMIYQD 3.35<br>EVKLPA<br>K      | 1,549.83 |
| ATP | 6006 | polymerase I and transcript release factor isoform 2 | gi 162287374                                                                                 | 43,446.30 | 100.00% | 10 | 13 | 13 | 0.14% | 24.10% | VPPFTFH 1.97<br>VK              | 1,071.60 |

|     |      |                                                                            |                                                                                     |           |         |    |    |    |       |        |                                      |          |
|-----|------|----------------------------------------------------------------------------|-------------------------------------------------------------------------------------|-----------|---------|----|----|----|-------|--------|--------------------------------------|----------|
| ATP | 6006 | B-cell<br>receptor-<br>associate<br>d protein<br>31                        | gi 5985830<br>3,gi 624605<br>74,gi 74354<br>925                                     | 27,884.40 | 99.80%  | 2  | 2  | 3  | 0.03% | 11.00% | KYMEEN 3.52<br>DLLKK                 | 1,426.72 |
| ATP | 6006 | B-cell<br>receptor-<br>associate<br>d protein<br>31                        | gi 5985830<br>3,gi 624605<br>74,gi 74354<br>925                                     | 27,884.40 | 99.80%  | 2  | 2  | 3  | 0.03% | 11.00% | VNLQNN 2.57<br>PGAVEH<br>FHMK        | 1,850.90 |
| ATP | 6006 | ITGA3<br>protein                                                           | gi 1515562<br>79,gi 15612<br>0449                                                   | 45,035.90 | 99.80%  | 2  | 2  | 3  | 0.03% | 6.34%  | EAGNPG 3.48<br>SLFGYS<br>VALHR       | 1,774.89 |
| ATP | 6006 | ITGA3<br>protein                                                           | gi 1515562<br>79,gi 15612<br>0449                                                   | 45,035.90 | 99.80%  | 2  | 2  | 3  | 0.03% | 6.34%  | YLLLAG 3.66<br>APR                   | 973.583  |
| ATP | 6006 | PREDIC<br>TED:<br>similar to<br>ribosomal<br>protein<br>S4, X-<br>linked X | gi 1199012<br>81,gi 11993<br>0307,gi 119<br>934106,gi 1<br>94668343,g<br>i 76660997 | 29,434.70 | 99.80%  | 2  | 2  | 2  | 0.02% | 8.75%  | ERHPGS 2.82<br>FDVVHV<br>K           | 1,506.78 |
| ATP | 6006 | PREDIC<br>TED:<br>similar to<br>ribosomal<br>protein<br>S4, X-<br>linked X | gi 1199012<br>81,gi 11993<br>0307,gi 119<br>934106,gi 1<br>94668343,g<br>i 76660997 | 29,434.70 | 99.80%  | 2  | 2  | 2  | 0.02% | 8.75%  | TIRYPDP 3.2<br>LIK                   | 1,215.71 |
| ATP | 6006 | RecName<br>:<br>Full=Pro<br>hibitin-2                                      | gi 1098928<br>20,gi 11405<br>1223,gi 875<br>78149                                   | 33,340.80 | 100.00% | 14 | 15 | 22 | 0.23% | 57.50% | AKDFSLI 3.1<br>LDDVAI<br>TELSFSR     | 2,240.18 |
| ATP | 6006 | RecName<br>:<br>Full=Pro<br>hibitin-2                                      | gi 1098928<br>20,gi 11405<br>1223,gi 875<br>78149                                   | 33,340.80 | 100.00% | 14 | 15 | 22 | 0.23% | 57.50% | DLQMVN 3.14<br>ISLR                  | 1,204.64 |
| ATP | 6006 | RecName<br>:<br>Full=Pro<br>hibitin-2                                      | gi 1098928<br>20,gi 11405<br>1223,gi 875<br>78149                                   | 33,340.80 | 100.00% | 14 | 15 | 22 | 0.23% | 57.50% | ESVFTV 2.96<br>EGGHR                 | 1,217.59 |
| ATP | 6006 | RecName<br>:<br>Full=Pro<br>hibitin-2                                      | gi 1098928<br>20,gi 11405<br>1223,gi 875<br>78149                                   | 33,340.80 | 100.00% | 14 | 15 | 22 | 0.23% | 57.50% | FNASQLI 3.86<br>TQR                  | 1,177.63 |
| ATP | 6006 | RecName<br>:<br>Full=Pro<br>hibitin-2                                      | gi 1098928<br>20,gi 11405<br>1223,gi 875<br>78149                                   | 33,340.80 | 100.00% | 14 | 15 | 22 | 0.23% | 57.50% | IGGVQQ 3.05<br>DTILAEQ<br>LHFR       | 1,853.99 |
| ATP | 6006 | RecName<br>:<br>Full=Pro<br>hibitin-2                                      | gi 1098928<br>20,gi 11405<br>1223,gi 875<br>78149                                   | 33,340.80 | 100.00% | 14 | 15 | 22 | 0.23% | 57.50% | IVQAEG 3.74<br>EAEAAR                | 1,243.63 |
| ATP | 6006 | RecName<br>:<br>Full=Pro<br>hibitin-2                                      | gi 1098928<br>20,gi 11405<br>1223,gi 875<br>78149                                   | 33,340.80 | 100.00% | 14 | 15 | 22 | 0.23% | 57.50% | IYLTAD 4.65<br>NLVLNL<br>QDESFT<br>R | 2,225.15 |
| ATP | 6006 | RecName<br>:<br>Full=Pro<br>hibitin-2                                      | gi 1098928<br>20,gi 11405<br>1223,gi 875<br>78149                                   | 33,340.80 | 100.00% | 14 | 15 | 22 | 0.23% | 57.50% | KISSPTG 2.28<br>SKDLQM<br>VNISLR     | 2,090.13 |
| ATP | 6006 | RecName<br>:<br>Full=Pro<br>hibitin-2                                      | gi 1098928<br>20,gi 11405<br>1223,gi 875<br>78149                                   | 33,340.80 | 100.00% | 14 | 15 | 22 | 0.23% | 57.50% | LGLDYE 2.75<br>ER                    | 994.4841 |
| ATP | 6006 | RecName<br>:<br>Full=Pro<br>hibitin-2                                      | gi 1098928<br>20,gi 11405<br>1223,gi 875<br>78149                                   | 33,340.80 | 100.00% | 14 | 15 | 22 | 0.23% | 57.50% | LLLGAG 4.37<br>AVAYGI<br>R           | 1,273.76 |

|     |      |                                               |                                                                                  |           |         |    |    |    |       |        |                                                              |          |
|-----|------|-----------------------------------------------|----------------------------------------------------------------------------------|-----------|---------|----|----|----|-------|--------|--------------------------------------------------------------|----------|
| ATP | 6006 | RecName<br>:<br>Full=Pro<br>hibitin-2         | gi 1098928<br>20,gi 11405<br>1223,gi 875<br>78149                                | 33,340.80 | 100.00% | 14 | 15 | 22 | 0.23% | 57.50% | MLGEAL 2.45<br>SKNPGYI<br>K                                  | 1,536.81 |
| ATP | 6006 | RecName<br>:<br>Full=Pro<br>hibitin-2         | gi 1098928<br>20,gi 11405<br>1223,gi 875<br>78149                                | 33,340.80 | 100.00% | 14 | 15 | 22 | 0.23% | 57.50% | QKIVQA 5.54<br>EGEAEA<br>AR                                  | 1,499.78 |
| ATP | 6006 | RecName<br>:<br>Full=Pro<br>hibitin-2         | gi 1098928<br>20,gi 11405<br>1223,gi 875<br>78149                                | 33,340.80 | 100.00% | 14 | 15 | 22 | 0.23% | 57.50% | VLPSIVN 2.87<br>EVLK                                         | 1,210.74 |
| ATP | 6006 | RecName<br>:<br>Full=Pro<br>hibitin-2         | gi 1098928<br>20,gi 11405<br>1223,gi 875<br>78149                                | 33,340.80 | 100.00% | 14 | 15 | 22 | 0.23% | 57.50% | VLSRPN 3.36<br>AMELPS<br>MYQR                                | 1,907.95 |
| ATP | 6006 | TAP1<br>protein                               | gi 1515570<br>07                                                                 | 81,933.30 | 100.00% | 5  | 8  | 8  | 0.08% | 9.33%  | GVVGAA 3.36<br>LGFR                                          | 946.5469 |
| ATP | 6006 | TAP1<br>protein                               | gi 1515570<br>07                                                                 | 81,933.30 | 100.00% | 5  | 8  | 8  | 0.08% | 9.33%  | SFANEE 3.35<br>GEAQKF<br>R                                   | 1,512.71 |
| ATP | 6006 | TAP1<br>protein                               | gi 1515570<br>07                                                                 | 81,933.30 | 100.00% | 5  | 8  | 8  | 0.08% | 9.33%  | SSQVAIE 2.99<br>VLSAMP<br>TVR                                | 1,703.90 |
| ATP | 6006 | TAP1<br>protein                               | gi 1515570<br>07                                                                 | 81,933.30 | 100.00% | 5  | 8  | 8  | 0.08% | 9.33%  | STVAAL 4.29<br>LQNLYQ<br>PTEGQV<br>LLDGEP<br>LPK             | 2,894.55 |
| ATP | 6006 | TAP1<br>protein                               | gi 1515570<br>07                                                                 | 81,933.30 | 100.00% | 5  | 8  | 8  | 0.08% | 9.33%  | STVAAL 2.71<br>LQNLYQ<br>PTEGQV<br>LLDGEP<br>LPKYE<br>H<br>R | 3,479.82 |
| ATP | 6006 | PREDIC<br>TED:<br>similar to<br>keratin<br>6A | gi 1946873<br>33,gi 61870<br>938,gi 7661<br>7862,gi 766<br>17868,gi 76<br>689949 | 60,808.20 | 100.00% | 3  | 4  | 5  | 0.05% | 9.98%  | FASFIDK 2.12<br>VR                                           | 1,082.60 |
| ATP | 6006 | PREDIC<br>TED:<br>similar to<br>keratin<br>6A | gi 1946873<br>33,gi 61870<br>938,gi 7661<br>7862,gi 766<br>17868,gi 76<br>689949 | 60,808.20 | 100.00% | 3  | 4  | 5  | 0.05% | 9.98%  | LLKEYQ 3.27<br>ELMNVK                                        | 1,507.82 |
| ATP | 6006 | PREDIC<br>TED:<br>similar to<br>keratin<br>6A | gi 1946873<br>33,gi 61870<br>938,gi 7661<br>7862,gi 766<br>17868,gi 76<br>689949 | 60,808.20 | 100.00% | 3  | 4  | 5  | 0.05% | 9.98%  | NKYEDE 2.84<br>INKR                                          | 1,308.65 |
| ATP | 6006 | PREDIC<br>TED:<br>similar to<br>keratin<br>6A | gi 1946873<br>33,gi 61870<br>938,gi 7661<br>7862,gi 766<br>17868,gi 76<br>689949 | 60,808.20 | 100.00% | 3  | 4  | 5  | 0.05% | 9.98%  | NLDLDSI 3.82<br>IAEVK                                        | 1,329.73 |
| ATP | 6006 | PREDIC<br>TED:<br>similar to<br>keratin<br>6A | gi 1946873<br>33,gi 61870<br>938,gi 7661<br>7862,gi 766<br>17868,gi 76<br>689949 | 60,808.20 | 100.00% | 3  | 4  | 5  | 0.05% | 9.98%  | NLDLDSI 3.16<br>IAEVKA<br>QYEEIA<br>QR                       | 2,418.25 |

|     |      |                                                                                                                                                                                                                                                                             |                                                              |           |         |    |    |    |       |        |                            |      |          |
|-----|------|-----------------------------------------------------------------------------------------------------------------------------------------------------------------------------------------------------------------------------------------------------------------------------|--------------------------------------------------------------|-----------|---------|----|----|----|-------|--------|----------------------------|------|----------|
| ATP | 6006 | PREDICTED:<br>similar to<br>keratin<br>6A                                                                                                                                                                                                                                   | gi 194687333,gi 61870938,gi 76617862,gi 76617868,gi 76689949 | 60,808.20 | 100.00% | 3  | 4  | 5  | 0.05% | 9.98%  | TLNNKF<br>ASFIDKVR         | 4.1  | 1,652.91 |
| ATP | 6006 | signal<br>sequence<br>receptor,<br>gamma<br>(translocon-<br>associated<br>protein<br>gamma)                                                                                                                                                                                 | gi 116004307,gi 122140189,gi 74268139                        | 21,057.60 | 99.80%  | 2  | 3  | 5  | 0.05% | 9.73%  | GGPKQQ<br>SEEDLLL<br>QDFSR | 3.89 | 2,047.01 |
| ATP | 6006 | signal<br>sequence<br>receptor,<br>gamma<br>(translocon-<br>associated<br>protein<br>gamma)                                                                                                                                                                                 | gi 116004307,gi 122140189,gi 74268139                        | 21,057.60 | 99.80%  | 2  | 3  | 5  | 0.05% | 9.73%  | QQSEED<br>LLLQDFSR         | 3.36 | 1,707.82 |
| ATP | 6006 | RecName:<br>Full=Ann<br>exin A2;<br>AltName:<br>Full=Ann 2<br>exin-2;<br>AltName:<br>Full=Ann<br>exin II;<br>AltName:<br>Full=Lipocortin<br>II;<br>AltName:<br>Full=Calpactin I<br>heavy<br>chain;<br>AltName:<br>Full=Chromobindin-8;<br>AltName:<br>Full=p36;<br>AltName: | gi 113948,gi 162779,gi 27807289,gi 59858385,gi 7358698       | 38,523.90 | 100.00% | 16 | 22 | 24 | 0.25% | 50.10% | AEDGSVI<br>DYELID<br>QDAR  | 3.14 | 1,908.88 |



|     |      |                                                                                                                                                                                                                                                                                                                                                           |           |         |    |    |    |       |        |                                                 |          |
|-----|------|-----------------------------------------------------------------------------------------------------------------------------------------------------------------------------------------------------------------------------------------------------------------------------------------------------------------------------------------------------------|-----------|---------|----|----|----|-------|--------|-------------------------------------------------|----------|
| ATP | 6006 | RecName gi 113948,g<br>: i 162779,g <br>Full=Ann 27807289,g<br>exin A2; i 59858385,<br>AltName: gi 7358698<br>Full=Ann 2<br>exin-2;<br>AltName:<br>Full=Ann<br>exin II;<br>AltName:<br>Full=Lip<br>ocortin<br>II;<br>AltName:<br>Full=Cal<br>pactin I<br>heavy<br>chain;<br>AltName:<br>Full=Chr<br>omobindi<br>n-8;<br>AltName:<br>Full=p36;<br>AltName: | 38,523.90 | 100.00% | 16 | 22 | 24 | 0.25% | 50.10% | AEDGSVI 2.63<br>DYELID<br>QDARDL<br>YDAGVK<br>R | 2,926.41 |
| ATP | 6006 | RecName gi 113948,g<br>: i 162779,g <br>Full=Ann 27807289,g<br>exin A2; i 59858385,<br>AltName: gi 7358698<br>Full=Ann 2<br>exin-2;<br>AltName:<br>Full=Ann<br>exin II;<br>AltName:<br>Full=Lip<br>ocortin<br>II;<br>AltName:<br>Full=Cal<br>pactin I<br>heavy<br>chain;<br>AltName:<br>Full=Chr<br>omobindi<br>n-8;<br>AltName:<br>Full=p36;<br>AltName: | 38,523.90 | 100.00% | 16 | 22 | 24 | 0.25% | 50.10% | AYTNFD 4.04<br>AERDAL<br>NIETAIK                | 2,155.07 |

|     |      |                                                                                                                                                                                                                                                                                                                                                           |           |         |    |    |    |       |        |                                 |          |
|-----|------|-----------------------------------------------------------------------------------------------------------------------------------------------------------------------------------------------------------------------------------------------------------------------------------------------------------------------------------------------------------|-----------|---------|----|----|----|-------|--------|---------------------------------|----------|
| ATP | 6006 | RecName gi 113948,g<br>: i 162779,g <br>Full=Ann 27807289,g<br>exin A2; i 59858385,<br>AltName: gi 7358698<br>Full=Ann 2<br>exin-2;<br>AltName:<br>Full=Ann<br>exin II;<br>AltName:<br>Full=Lip<br>ocortin<br>II;<br>AltName:<br>Full=Cal<br>pactin I<br>heavy<br>chain;<br>AltName:<br>Full=Chr<br>omobindi<br>n-8;<br>AltName:<br>Full=p36;<br>AltName: | 38,523.90 | 100.00% | 16 | 22 | 24 | 0.25% | 50.10% | GVDEVT 4.9<br>IVNLTN<br>R       | 1,542.85 |
| ATP | 6006 | RecName gi 113948,g<br>: i 162779,g <br>Full=Ann 27807289,g<br>exin A2; i 59858385,<br>AltName: gi 7358698<br>Full=Ann 2<br>exin-2;<br>AltName:<br>Full=Ann<br>exin II;<br>AltName:<br>Full=Lip<br>ocortin<br>II;<br>AltName:<br>Full=Cal<br>pactin I<br>heavy<br>chain;<br>AltName:<br>Full=Chr<br>omobindi<br>n-8;<br>AltName:<br>Full=p36;<br>AltName: | 38,523.90 | 100.00% | 16 | 22 | 24 | 0.25% | 50.10% | LSLEGD 4.01<br>HSTPPSA<br>YGSVK | 1,844.90 |

|     |      |                                                                                                                                                                                                                                                                                                                                                           |           |         |    |    |    |       |        |                            |      |          |
|-----|------|-----------------------------------------------------------------------------------------------------------------------------------------------------------------------------------------------------------------------------------------------------------------------------------------------------------------------------------------------------------|-----------|---------|----|----|----|-------|--------|----------------------------|------|----------|
| ATP | 6006 | RecName gi 113948,g<br>: i 162779,g <br>Full=Ann 27807289,g<br>exin A2; i 59858385,<br>AltName: gi 7358698<br>Full=Ann 2<br>exin-2;<br>AltName:<br>Full=Ann<br>exin II;<br>AltName:<br>Full=Lip<br>ocortin<br>II;<br>AltName:<br>Full=Cal<br>pactin I<br>heavy<br>chain;<br>AltName:<br>Full=Chr<br>omobindi<br>n-8;<br>AltName:<br>Full=p36;<br>AltName: | 38,523.90 | 100.00% | 16 | 22 | 24 | 0.25% | 50.10% | QDIAFA<br>YQR              | 2.39 | 1,111.55 |
| ATP | 6006 | RecName gi 113948,g<br>: i 162779,g <br>Full=Ann 27807289,g<br>exin A2; i 59858385,<br>AltName: gi 7358698<br>Full=Ann 2<br>exin-2;<br>AltName:<br>Full=Ann<br>exin II;<br>AltName:<br>Full=Lip<br>ocortin<br>II;<br>AltName:<br>Full=Cal<br>pactin I<br>heavy<br>chain;<br>AltName:<br>Full=Chr<br>omobindi<br>n-8;<br>AltName:<br>Full=p36;<br>AltName: | 38,523.90 | 100.00% | 16 | 22 | 24 | 0.25% | 50.10% | RAEDGS<br>VIDYELI<br>DQDAR | 3.93 | 2,064.98 |

|     |      |                                                                                                                                                                                                                                                                                                                                                           |           |         |    |    |    |       |        |                                                 |          |
|-----|------|-----------------------------------------------------------------------------------------------------------------------------------------------------------------------------------------------------------------------------------------------------------------------------------------------------------------------------------------------------------|-----------|---------|----|----|----|-------|--------|-------------------------------------------------|----------|
| ATP | 6006 | RecName gi 113948,g<br>: i 162779,g <br>Full=Ann 27807289,g<br>exin A2; i 59858385,<br>AltName: gi 7358698<br>Full=Ann 2<br>exin-2;<br>AltName:<br>Full=Ann<br>exin II;<br>AltName:<br>Full=Lip<br>ocortin<br>II;<br>AltName:<br>Full=Cal<br>pactin I<br>heavy<br>chain;<br>AltName:<br>Full=Chr<br>omobindi<br>n-8;<br>AltName:<br>Full=p36;<br>AltName: | 38,523.90 | 100.00% | 16 | 22 | 24 | 0.25% | 50.10% | RAEDGS 4.01<br>VIDYELI<br>DQDARD<br>LYDAGV<br>K | 2,926.41 |
| ATP | 6006 | RecName gi 113948,g<br>: i 162779,g <br>Full=Ann 27807289,g<br>exin A2; i 59858385,<br>AltName: gi 7358698<br>Full=Ann 2<br>exin-2;<br>AltName:<br>Full=Ann<br>exin II;<br>AltName:<br>Full=Lip<br>ocortin<br>II;<br>AltName:<br>Full=Cal<br>pactin I<br>heavy<br>chain;<br>AltName:<br>Full=Chr<br>omobindi<br>n-8;<br>AltName:<br>Full=p36;<br>AltName: | 38,523.90 | 100.00% | 16 | 22 | 24 | 0.25% | 50.10% | SALSGH 3.74<br>LETVILG<br>LLK                   | 1,650.98 |

|     |      |                                                                                                                                                                                                                                                                                                                                                           |           |         |    |    |    |       |        |                               |          |
|-----|------|-----------------------------------------------------------------------------------------------------------------------------------------------------------------------------------------------------------------------------------------------------------------------------------------------------------------------------------------------------------|-----------|---------|----|----|----|-------|--------|-------------------------------|----------|
| ATP | 6006 | RecName gi 113948,g<br>: i 162779,g <br>Full=Ann 27807289,g<br>exin A2; i 59858385,<br>AltName: gi 7358698<br>Full=Ann 2<br>exin-2;<br>AltName:<br>Full=Ann<br>exin II;<br>AltName:<br>Full=Lip<br>ocortin<br>II;<br>AltName:<br>Full=Cal<br>pactin I<br>heavy<br>chain;<br>AltName:<br>Full=Chr<br>omobindi<br>n-8;<br>AltName:<br>Full=p36;<br>AltName: | 38,523.90 | 100.00% | 16 | 22 | 24 | 0.25% | 50.10% | SLYYYIQ 2.67<br>QDTKGD<br>YQK | 2,012.96 |
| ATP | 6006 | RecName gi 113948,g<br>: i 162779,g <br>Full=Ann 27807289,g<br>exin A2; i 59858385,<br>AltName: gi 7358698<br>Full=Ann 2<br>exin-2;<br>AltName:<br>Full=Ann<br>exin II;<br>AltName:<br>Full=Lip<br>ocortin<br>II;<br>AltName:<br>Full=Cal<br>pactin I<br>heavy<br>chain;<br>AltName:<br>Full=Chr<br>omobindi<br>n-8;<br>AltName:<br>Full=p36;<br>AltName: | 38,523.90 | 100.00% | 16 | 22 | 24 | 0.25% | 50.10% | SNEQRQ 5.24<br>DIAFAY<br>QR   | 1,725.83 |

|     |      |                                                                                                                                                                                                                                                                                                                                                           |           |         |    |    |    |       |        |                              |          |
|-----|------|-----------------------------------------------------------------------------------------------------------------------------------------------------------------------------------------------------------------------------------------------------------------------------------------------------------------------------------------------------------|-----------|---------|----|----|----|-------|--------|------------------------------|----------|
| ATP | 6006 | RecName gi 113948,g<br>: i 162779,g <br>Full=Ann 27807289,g<br>exin A2; i 59858385,<br>AltName: gi 7358698<br>Full=Ann 2<br>exin-2;<br>AltName:<br>Full=Ann<br>exin II;<br>AltName:<br>Full=Lip<br>ocortin<br>II;<br>AltName:<br>Full=Cal<br>pactin I<br>heavy<br>chain;<br>AltName:<br>Full=Chr<br>omobindi<br>n-8;<br>AltName:<br>Full=p36;<br>AltName: | 38,523.90 | 100.00% | 16 | 22 | 24 | 0.25% | 50.10% | SYSPYD 2.38<br>MLESIK        | 1,448.66 |
| ATP | 6006 | RecName gi 113948,g<br>: i 162779,g <br>Full=Ann 27807289,g<br>exin A2; i 59858385,<br>AltName: gi 7358698<br>Full=Ann 2<br>exin-2;<br>AltName:<br>Full=Ann<br>exin II;<br>AltName:<br>Full=Lip<br>ocortin<br>II;<br>AltName:<br>Full=Cal<br>pactin I<br>heavy<br>chain;<br>AltName:<br>Full=Chr<br>omobindi<br>n-8;<br>AltName:<br>Full=p36;<br>AltName: | 38,523.90 | 100.00% | 16 | 22 | 24 | 0.25% | 50.10% | TDLEKDI 3.2<br>VSDTSG<br>DFR | 1,797.85 |

|     |      |                                                                                                                                                                                                                                                                                                                                                           |           |         |    |    |    |       |        |                                |          |
|-----|------|-----------------------------------------------------------------------------------------------------------------------------------------------------------------------------------------------------------------------------------------------------------------------------------------------------------------------------------------------------------|-----------|---------|----|----|----|-------|--------|--------------------------------|----------|
| ATP | 6006 | RecName gi 113948,g<br>: i 162779,g <br>Full=Ann 27807289,g<br>exin A2; i 59858385,<br>AltName: gi 7358698<br>Full=Ann 2<br>exin-2;<br>AltName:<br>Full=Ann<br>exin II;<br>AltName:<br>Full=Lip<br>ocortin<br>II;<br>AltName:<br>Full=Cal<br>pactin I<br>heavy<br>chain;<br>AltName:<br>Full=Chr<br>omobindi<br>n-8;<br>AltName:<br>Full=p36;<br>AltName: | 38,523.90 | 100.00% | 16 | 22 | 24 | 0.25% | 50.10% | TDLEKDI 4.06<br>VSDTSG<br>DFRK | 1,925.95 |
| ATP | 6006 | RecName gi 113948,g<br>: i 162779,g <br>Full=Ann 27807289,g<br>exin A2; i 59858385,<br>AltName: gi 7358698<br>Full=Ann 2<br>exin-2;<br>AltName:<br>Full=Ann<br>exin II;<br>AltName:<br>Full=Lip<br>ocortin<br>II;<br>AltName:<br>Full=Cal<br>pactin I<br>heavy<br>chain;<br>AltName:<br>Full=Chr<br>omobindi<br>n-8;<br>AltName:<br>Full=p36;<br>AltName: | 38,523.90 | 100.00% | 16 | 22 | 24 | 0.25% | 50.10% | TKGVDE 4.24<br>VTIVNIL<br>TNR  | 1,771.99 |

|     |      |                                                                                                                                                                                                                                                                                                                                                           |           |         |    |    |    |       |        |                                   |          |
|-----|------|-----------------------------------------------------------------------------------------------------------------------------------------------------------------------------------------------------------------------------------------------------------------------------------------------------------------------------------------------------------|-----------|---------|----|----|----|-------|--------|-----------------------------------|----------|
| ATP | 6006 | RecName gi 113948,g<br>: i 162779,gj<br>Full=Ann 27807289,g<br>exin A2; i 59858385,<br>AltName: gi 7358698<br>Full=Ann 2<br>exin-2;<br>AltName:<br>Full=Ann<br>exin II;<br>AltName:<br>Full=Lip<br>ocortin<br>II;<br>AltName:<br>Full=Cal<br>pactin I<br>heavy<br>chain;<br>AltName:<br>Full=Chr<br>omobindi<br>n-8;<br>AltName:<br>Full=p36;<br>AltName: | 38,523.90 | 100.00% | 16 | 22 | 24 | 0.25% | 50.10% | TPAQYD 4.06<br>ASELKA<br>SMK      | 1,655.79 |
| ATP | 6006 | RecName gi 1102830<br>: 11,gj 27806<br>Full=Try 353,gj 7435<br>ptophanyl-4933,gj 825<br>tRNA<br>synthetas<br>e,<br>cytoplas<br>mic;<br>AltName:<br>Full=Try<br>ptophan--<br>tRNA<br>ligase;<br>Short=Tr<br>pRS                                                                                                                                            | 53,712.80 | 100.00% | 3  | 3  | 3  | 0.03% | 11.40% | ELIEVLQ 2.67<br>PLIAEHQ<br>AR     | 1,859.04 |
| ATP | 6006 | RecName gi 1102830<br>: 11,gj 27806<br>Full=Try 353,gj 7435<br>ptophanyl-4933,gj 825<br>tRNA<br>synthetas<br>e,<br>cytoplas<br>mic;<br>AltName:<br>Full=Try<br>ptophan--<br>tRNA<br>ligase;<br>Short=Tr<br>pRS                                                                                                                                            | 53,712.80 | 100.00% | 3  | 3  | 3  | 0.03% | 11.40% | ISFPAIQ 3.5<br>AAPSFNS<br>SFPQIFR | 2,325.20 |



|     |      |                                                                                                                                                                                                                |            |         |   |   |   |       |        |                                                        |      |          |
|-----|------|----------------------------------------------------------------------------------------------------------------------------------------------------------------------------------------------------------------|------------|---------|---|---|---|-------|--------|--------------------------------------------------------|------|----------|
| ATP | 6006 | RecName gi 1102830<br>: 11,gi 27806<br>Full=Try 353,gi 7435<br>ptophanyl-4933,gi 825<br>tRNA<br>synthetas<br>e,<br>cytoplas<br>mic;<br>AltName:<br>Full=Try<br>ptophan--<br>tRNA<br>ligase;<br>Short=Tr<br>pRS | 53,712.80  | 100.00% | 3 | 3 | 3 | 0.03% | 11.40% | MSASDP<br>NSSIFLT<br>DTAK                              | 3.48 | 1,800.83 |
| ATP | 6006 | PREDIC gi 1198922<br>TED: 65<br>similar to<br>Transme<br>mbrane<br>protein<br>16F                                                                                                                              | 106,290.10 | 99.80%  | 2 | 2 | 2 | 0.02% | 3.62%  | LLQVDE<br>SIKPEQ<br>EFFTAPF<br>EK                      | 2.52 | 2,608.35 |
| ATP | 6006 | PREDIC gi 1198922<br>TED: 65<br>similar to<br>Transme<br>mbrane<br>protein<br>16F                                                                                                                              | 106,290.10 | 99.80%  | 2 | 2 | 2 | 0.02% | 3.62%  | SLVDDK<br>LVFVK                                        | 2.15 | 1,262.74 |
| ATP | 6006 | VAPB gi 1260107<br>protein 84,gi 12927<br>0105,gi 160<br>210887                                                                                                                                                | 27,140.50  | 100.00% | 3 | 4 | 4 | 0.04% | 11.50% | FRGPFT<br>DVVTTN<br>LK                                 | 3.19 | 1,594.86 |
| ATP | 6006 | VAPB gi 1260107<br>protein 84,gi 12927<br>0105,gi 160<br>210887                                                                                                                                                | 27,140.50  | 100.00% | 3 | 4 | 4 | 0.04% | 11.50% | GPFTDV<br>VTTNLK                                       | 3.76 | 1,291.69 |
| ATP | 6006 | VAPB gi 1260107<br>protein 84,gi 12927<br>0105,gi 160<br>210887                                                                                                                                                | 27,140.50  | 100.00% | 3 | 4 | 4 | 0.04% | 11.50% | VEQVLS<br>LEPQHE<br>LK                                 | 4.55 | 1,648.89 |
| ATP | 6006 | moesin gi 1140507<br>15,gi 11858<br>3148,gi 875<br>78169                                                                                                                                                       | 67,959.00  | 100.00% | 6 | 7 | 7 | 0.07% | 16.50% | APDFVF<br>YAPR                                         | 3.27 | 1,182.59 |
| ATP | 6006 | moesin gi 1140507<br>15,gi 11858<br>3148,gi 875<br>78169                                                                                                                                                       | 67,959.00  | 100.00% | 6 | 7 | 7 | 0.07% | 16.50% | AQMVQE<br>DLEKTR<br>AELK                               | 2.14 | 1,904.97 |
| ATP | 6006 | moesin gi 1140507<br>15,gi 11858<br>3148,gi 875<br>78169                                                                                                                                                       | 67,959.00  | 100.00% | 6 | 7 | 7 | 0.07% | 16.50% | ERQEAE<br>EAKEAL<br>LQASQD<br>QK                       | 2.94 | 2,301.13 |
| ATP | 6006 | moesin gi 1140507<br>15,gi 11858<br>3148,gi 875<br>78169                                                                                                                                                       | 67,959.00  | 100.00% | 6 | 7 | 7 | 0.07% | 16.50% | FYPEDV<br>SEELIQD<br>ITQR                              | 2.53 | 2,082.00 |
| ATP | 6006 | moesin gi 1140507<br>15,gi 11858<br>3148,gi 875<br>78169                                                                                                                                                       | 67,959.00  | 100.00% | 6 | 7 | 7 | 0.07% | 16.50% | KAPDFV<br>FYAPR                                        | 3.08 | 1,310.69 |
| ATP | 6006 | moesin gi 1140507<br>15,gi 11858<br>3148,gi 875<br>78169                                                                                                                                                       | 67,959.00  | 100.00% | 6 | 7 | 7 | 0.07% | 16.50% | TAMSTP<br>HVAEPA<br>ENEQDE<br>QDENG<br>EASAE<br>L<br>R | 6.63 | 3,342.43 |

|     |      |                                                                                                                |                                                                                    |           |         |   |   |   |       |        |                      |      |          |
|-----|------|----------------------------------------------------------------------------------------------------------------|------------------------------------------------------------------------------------|-----------|---------|---|---|---|-------|--------|----------------------|------|----------|
| ATP | 6006 | PREDIC TED: 09<br>similar to Keratin, type I cytoskeletal 24 (Cytokeratin-24) (Keratin-24) (Type I keratin-24) | gi 194676109                                                                       | 55,111.70 | 99.80%  | 2 | 3 | 3 | 0.03% | 5.33%  | KVLDDL TMTR          | 3.42 | 1,207.64 |
| ATP | 6006 | PREDIC TED: 09<br>similar to Keratin, type I cytoskeletal 24 (Cytokeratin-24) (Keratin-24) (Type I keratin-24) | gi 194676109                                                                       | 55,111.70 | 99.80%  | 2 | 3 | 3 | 0.03% | 5.33%  | SDLEMQ IESLTEE LAYLK | 2.79 | 2,112.04 |
| ATP | 6006 | PREDIC TED: 15,gi 119922774<br>transmembrane protein 33 isoform 2                                              | gi 119893815,gi 119922774                                                          | 27,968.00 | 99.80%  | 2 | 2 | 2 | 0.02% | 8.10%  | ALLANA LTSALR        | 3.73 | 1,213.73 |
| ATP | 6006 | PREDIC TED: 15,gi 119922774<br>transmembrane protein 33 isoform 2                                              | gi 119893815,gi 119922774                                                          | 27,968.00 | 99.80%  | 2 | 2 | 2 | 0.02% | 8.10%  | LPHFQLS R            | 2.22 | 997.5578 |
| ATP | 6006 | Chain A, Crystallization And Structure Determination Of Bovine Profilin At 2.0 Angstroms Resolution            | gi 157833536,gi 157878211,gi 576369,gi 59858521,gi 6288870,gi 62751593,gi 73586531 | 15,039.50 | 100.00% | 5 | 6 | 8 | 0.08% | 45.00% | DSLLQD GEFTMD LR     | 3.21 | 1,655.76 |
| ATP | 6006 | Chain A, Crystallization And Structure Determination Of Bovine Profilin At 2.0 Angstroms Resolution            | gi 157833536,gi 157878211,gi 576369,gi 59858521,gi 6288870,gi 62751593,gi 73586531 | 15,039.50 | 100.00% | 5 | 6 | 8 | 0.08% | 45.00% | SSFFVNG LTLGGQ K     | 3.8  | 1,454.76 |

|     |      |                                                                                                                   |                                                                         |           |         |   |   |   |       |        |                                                         |      |          |
|-----|------|-------------------------------------------------------------------------------------------------------------------|-------------------------------------------------------------------------|-----------|---------|---|---|---|-------|--------|---------------------------------------------------------|------|----------|
| ATP | 6006 | Chain A, gi 1578335<br>Crystallization And Structure Determination Of Bovine Profilin At 2.0 Angstroms Resolution | 36,gi 157878211,gi 576369,gi 59858521,gi 628870,gi 62751593,gi 73586531 | 15,039.50 | 100.00% | 5 | 6 | 8 | 0.08% | 45.00% | STGGAP<br>TFNITVT<br>MTAK                               | 3.35 | 1,712.85 |
| ATP | 6006 | Chain A, gi 1578335<br>Crystallization And Structure Determination Of Bovine Profilin At 2.0 Angstroms Resolution | 36,gi 157878211,gi 576369,gi 59858521,gi 628870,gi 62751593,gi 73586531 | 15,039.50 | 100.00% | 5 | 6 | 8 | 0.08% | 45.00% | TFVNITP<br>AEVGILV<br>GK                                | 3.06 | 1,657.95 |
| ATP | 6006 | Chain A, gi 1578335<br>Crystallization And Structure Determination Of Bovine Profilin At 2.0 Angstroms Resolution | 36,gi 157878211,gi 576369,gi 59858521,gi 628870,gi 62751593,gi 73586531 | 15,039.50 | 100.00% | 5 | 6 | 8 | 0.08% | 45.00% | TFVNITP<br>AEVGILV<br>GKDR                              | 2.64 | 1,929.08 |
| ATP | 6006 | Brain abundant membrane attached signal protein 1                                                                 | gi 115304757,gi 1930063,gi 27807507,gi 6686271                          | 22,992.60 | 99.80%  | 2 | 3 | 3 | 0.03% | 28.20% | AQAPAA<br>PADEVK<br>PAETPA<br>ANSDQT<br>VAVKE           | 3.39 | 2,876.43 |
| ATP | 6006 | Brain abundant membrane attached signal protein 1                                                                 | gi 115304757,gi 1930063,gi 27807507,gi 6686271                          | 22,992.60 | 99.80%  | 2 | 3 | 3 | 0.03% | 28.20% | SDGAPA<br>SDSKPSS<br>TEAAPSS<br>KETPAA<br>TEAPSST<br>PK | 4.28 | 3,344.56 |
| ATP | 6006 | Heme oxygenase (decyclin g) 1                                                                                     | gi 158455152,gi 59858301,gi 62460520,gi 73919958                        | 32,922.40 | 99.80%  | 2 | 3 | 5 | 0.05% | 14.90% | ALNLPSS<br>GGLAF<br>FTFPNIA<br>SATK                     | 3.84 | 2,453.27 |
| ATP | 6006 | Heme oxygenase (decyclin g) 1                                                                                     | gi 158455152,gi 59858301,gi 62460520,gi 73919958                        | 32,922.40 | 99.80%  | 2 | 3 | 5 | 0.05% | 14.90% | LVMASL<br>YHIYVA<br>LEEEIER                             | 4.05 | 2,294.17 |

|     |      |                                                                                                                                                                                         |                           |           |         |   |   |   |       |        |                                    |      |          |
|-----|------|-----------------------------------------------------------------------------------------------------------------------------------------------------------------------------------------|---------------------------|-----------|---------|---|---|---|-------|--------|------------------------------------|------|----------|
| ATP | 6006 | annexin 5<br>60,gi 12047<br>4983,gi 260<br>137,gi 7358<br>6525                                                                                                                          | gi 1199365                | 36,057.60 | 100.00% | 3 | 3 | 3 | 0.03% | 13.40% | DLLDDL<br>KSELTG<br>KFEK           | 2.89 | 1,850.98 |
| ATP | 6006 | annexin 5<br>60,gi 12047<br>4983,gi 260<br>137,gi 7358<br>6525                                                                                                                          | gi 1199365                | 36,057.60 | 100.00% | 3 | 3 | 3 | 0.03% | 13.40% | GLGTDE<br>ESILTLL<br>TSR           | 2.04 | 1,704.90 |
| ATP | 6006 | annexin 5<br>60,gi 12047<br>4983,gi 260<br>137,gi 7358<br>6525                                                                                                                          | gi 1199365                | 36,057.60 | 100.00% | 3 | 3 | 3 | 0.03% | 13.40% | NFGTSL<br>YSMIK                    | 2.56 | 1,276.62 |
| ATP | 6006 | RecName<br>:<br>Full=Mit<br>ochondri<br>al 2-<br>oxoglutar<br>ate/malat<br>e carrier<br>protein;<br>Short=O<br>GCP;<br>AltName:<br>Full=Solu<br>te carrier<br>family 25<br>member<br>11 | gi 126664,g<br>i 14623167 | 33,881.70 | 100.00% | 3 | 3 | 3 | 0.03% | 14.80% | AVVVNA<br>AQLASY<br>SQSK           | 3.52 | 1,635.87 |
| ATP | 6006 | RecName<br>:<br>Full=Mit<br>ochondri<br>al 2-<br>oxoglutar<br>ate/malat<br>e carrier<br>protein;<br>Short=O<br>GCP;<br>AltName:<br>Full=Solu<br>te carrier<br>family 25<br>member<br>11 | gi 126664,g<br>i 14623167 | 33,881.70 | 100.00% | 3 | 3 | 3 | 0.03% | 14.80% | FLFGGL<br>AGMGAT<br>VFVQPL<br>DLVK | 3.87 | 2,296.24 |

|     |      |                                                                                                                                                                                         |                                                                                                                                        |           |         |   |   |   |       |        |                                  |      |          |
|-----|------|-----------------------------------------------------------------------------------------------------------------------------------------------------------------------------------------|----------------------------------------------------------------------------------------------------------------------------------------|-----------|---------|---|---|---|-------|--------|----------------------------------|------|----------|
| ATP | 6006 | RecName<br>:<br>Full=Mit<br>ochondri<br>al 2-<br>oxoglutar<br>ate/malat<br>e carrier<br>protein;<br>Short=O<br>GCP;<br>AltName:<br>Full=Solu<br>te carrier<br>family 25<br>member<br>11 | gi 126664.g<br>i 14623167<br>6,gi 148744<br>036,gi 1488<br>78065,gi 16<br>3432,gi 163<br>434,gi 2780<br>7211,gi 32,<br>gi 5985797<br>7 | 33,881.70 | 100.00% | 3 | 3 | 3 | 0.03% | 14.80% | NVFNAL<br>FR                     | 2.16 | 980.5311 |
| ATP | 6006 | ER lipid<br>raft<br>associate<br>d 2                                                                                                                                                    | gi 1140510<br>93,gi 12213<br>4590,gi 920<br>97476                                                                                      | 37,713.20 | 100.00% | 3 | 3 | 3 | 0.03% | 10.10% | LTPEYL<br>QLMK                   | 1.94 | 1,251.67 |
| ATP | 6006 | ER lipid<br>raft<br>associate<br>d 2                                                                                                                                                    | gi 1140510<br>93,gi 12213<br>4590,gi 920<br>97476                                                                                      | 37,713.20 | 100.00% | 3 | 3 | 3 | 0.03% | 10.10% | SVQTTL<br>QTDEVK                 | 3.19 | 1,348.70 |
| ATP | 6006 | ER lipid<br>raft<br>associate<br>d 2                                                                                                                                                    | gi 1140510<br>93,gi 12213<br>4590,gi 920<br>97476                                                                                      | 37,713.20 | 100.00% | 3 | 3 | 3 | 0.03% | 10.10% | VTKPNI<br>EAIRR                  | 1.93 | 1,393.83 |
| ATP | 6006 | GLI<br>pathogen<br>esis-<br>related 2                                                                                                                                                   | gi 1113070<br>81,gi 11549<br>7826                                                                                                      | 17,191.20 | 99.80%  | 2 | 2 | 2 | 0.02% | 16.90% | ASASD<br>SSFVVA<br>R             | 3.19 | 1,253.61 |
| ATP | 6006 | GLI<br>pathogen<br>esis-<br>related 2                                                                                                                                                   | gi 1113070<br>81,gi 11549<br>7826                                                                                                      | 17,191.20 | 99.80%  | 2 | 2 | 2 | 0.02% | 16.90% | EAQQYS<br>EALAST<br>R            | 2.87 | 1,453.69 |
| ATP | 6006 | ATAD3A<br>protein                                                                                                                                                                       | gi 1572788<br>89,gi 15742<br>8048,gi 162<br>416153                                                                                     | 66,090.40 | 100.00% | 4 | 5 | 5 | 0.05% | 7.51%  | ITVLEA<br>R                      | 2.84 | 914.567  |
| ATP | 6006 | ATAD3A<br>protein                                                                                                                                                                       | gi 1572788<br>89,gi 15742<br>8048,gi 162<br>416153                                                                                     | 66,090.40 | 100.00% | 4 | 5 | 5 | 0.05% | 7.51%  | ITVLEA<br>RHPIQV<br>R            | 1.7  | 1,732.02 |
| ATP | 6006 | ATAD3A<br>protein                                                                                                                                                                       | gi 1572788<br>89,gi 15742<br>8048,gi 162<br>416153                                                                                     | 66,090.40 | 100.00% | 4 | 5 | 5 | 0.05% | 7.51%  | LKEYEA<br>AVEQLK<br>GDQIR        | 4.51 | 1,990.06 |
| ATP | 6006 | ATAD3A<br>protein                                                                                                                                                                       | gi 1572788<br>89,gi 15742<br>8048,gi 162<br>416153                                                                                     | 66,090.40 | 100.00% | 4 | 5 | 5 | 0.05% | 7.51%  | NVLMYG<br>PPGTGK                 | 2.96 | 1,249.62 |
| ATP | 6006 | glucose-<br>regulated<br>protein<br>GRP94<br>precursor                                                                                                                                  | gi 1604105<br>7,gi 278072<br>63,gi 33301<br>108,gi 7577<br>5556                                                                        | 92,411.40 | 100.00% | 7 | 7 | 7 | 0.07% | 11.80% | AQAYQT<br>GKDISTN<br>YYASQK<br>K | 3.35 | 2,265.11 |
| ATP | 6006 | glucose-<br>regulated<br>protein<br>GRP94<br>precursor                                                                                                                                  | gi 1604105<br>7,gi 278072<br>63,gi 33301<br>108,gi 7577<br>5556                                                                        | 92,411.40 | 100.00% | 7 | 7 | 7 | 0.07% | 11.80% | ELISNA<br>DALDKI<br>R            | 2.98 | 1,544.83 |

|     |      |                                                                                  |                                                 |            |         |   |   |   |       |        |                       |      |          |
|-----|------|----------------------------------------------------------------------------------|-------------------------------------------------|------------|---------|---|---|---|-------|--------|-----------------------|------|----------|
| ATP | 6006 | glucose-regulated protein GRP94 precursor                                        | gi 16041057,gi 27807263,gi 33301108,gi 75775556 | 92,411.40  | 100.00% | 7 | 7 | 7 | 0.07% | 11.80% | FAFQAE VNR            | 2.94 | 1,081.54 |
| ATP | 6006 | glucose-regulated protein GRP94 precursor                                        | gi 16041057,gi 27807263,gi 33301108,gi 75775556 | 92,411.40  | 100.00% | 7 | 7 | 7 | 0.07% | 11.80% | FQSSH PSDMTS LDQYVE R | 5.14 | 2,280.00 |
| ATP | 6006 | glucose-regulated protein GRP94 precursor                                        | gi 16041057,gi 27807263,gi 33301108,gi 75775556 | 92,411.40  | 100.00% | 7 | 7 | 7 | 0.07% | 11.80% | LIINSLY K             | 2.48 | 963.5874 |
| ATP | 6006 | glucose-regulated protein GRP94 precursor                                        | gi 16041057,gi 27807263,gi 33301108,gi 75775556 | 92,411.40  | 100.00% | 7 | 7 | 7 | 0.07% | 11.80% | NLLHVT DTGVG MTR      | 3.13 | 1,529.77 |
| ATP | 6006 | glucose-regulated protein GRP94 precursor                                        | gi 16041057,gi 27807263,gi 33301108,gi 75775556 | 92,411.40  | 100.00% | 7 | 7 | 7 | 0.07% | 11.80% | SILFVPT SAPR          | 2.94 | 1,187.68 |
| ATP | 6006 | PREDICTED: similar to FXFD domain-containing ion transport regulator 5 isoform 1 | gi 76641186                                     | 18,921.80  | 99.80%  | 2 | 2 | 2 | 0.02% | 10.40% | EDDPFF YDETL R        | 3.26 | 1,661.70 |
| ATP | 6006 | PREDICTED: similar to FXFD domain-containing ion transport regulator 5 isoform 1 | gi 76641186                                     | 18,921.80  | 99.80%  | 2 | 2 | 2 | 0.02% | 10.40% | QPGSKE DDPFF YDETL R  | 3.05 | 2,158.96 |
| ATP | 6006 | PREDICTED: similar to catenin, delta 1                                           | gi 194673532                                    | 106,846.20 | 100.00% | 4 | 5 | 6 | 0.06% | 6.67%  | ALSAIAD LLTNEHER      | 3.27 | 1,652.86 |
| ATP | 6006 | PREDICTED: similar to catenin, delta 1                                           | gi 194673532                                    | 106,846.20 | 100.00% | 4 | 5 | 6 | 0.06% | 6.67%  | APSRQD VYGPQP QVR     | 4.49 | 1,697.87 |
| ATP | 6006 | PREDICTED: similar to catenin, delta 1                                           | gi 194673532                                    | 106,846.20 | 100.00% | 4 | 5 | 6 | 0.06% | 6.67%  | HYEDGY PGSGDN YGSLSR  | 3.71 | 1,973.83 |

|     |      |                                                   |                                                   |            |         |   |   |   |       |        |                                     |      |          |
|-----|------|---------------------------------------------------|---------------------------------------------------|------------|---------|---|---|---|-------|--------|-------------------------------------|------|----------|
| ATP | 6006 | PREDIC TED:<br>similar to catenin, delta 1        | gi 1946735<br>32                                  | 106,846.20 | 100.00% | 4 | 5 | 6 | 0.06% | 6.67%  | KPTEDP<br>TNDTVD<br>FPKR            | 3.88 | 1,859.91 |
| ATP | 6006 | FK506 binding protein 11, 19 kDa                  | gi 1140533<br>49,gi 12213<br>8212,gi 825<br>71590 | 22,457.80  | 100.00% | 3 | 5 | 5 | 0.05% | 15.30% | IFDTSLT<br>RDPLVIE<br>LGQK          | 5.21 | 2,045.13 |
| ATP | 6006 | FK506 binding protein 11, 19 kDa                  | gi 1140533<br>49,gi 12213<br>8212,gi 825<br>71590 | 22,457.80  | 100.00% | 3 | 5 | 5 | 0.05% | 15.30% | RVIIPSH<br>LAYGKR                   | 2.68 | 1,509.90 |
| ATP | 6006 | FK506 binding protein 11, 19 kDa                  | gi 1140533<br>49,gi 12213<br>8212,gi 825<br>71590 | 22,457.80  | 100.00% | 3 | 5 | 5 | 0.05% | 15.30% | VIIPSHL<br>AYGKR                    | 2.13 | 1,353.80 |
| ATP | 6006 | endoglin                                          | gi 1154971<br>10,gi 92097<br>469                  | 69,885.10  | 99.80%  | 2 | 3 | 5 | 0.05% | 3.25%  | FSFLLR                              | 1.75 | 782.4559 |
| ATP | 6006 | endoglin                                          | gi 1154971<br>10,gi 92097<br>469                  | 69,885.10  | 99.80%  | 2 | 3 | 5 | 0.05% | 3.25%  | LQAPGIP<br>LQLAYD<br>SK             | 4.68 | 1,613.89 |
| ATP | 6006 | SPTLC2 protein                                    | gi 1487455<br>25,gi 14964<br>2795                 | 62,871.50  | 100.00% | 3 | 4 | 4 | 0.04% | 8.72%  | AYLYLD<br>EAHSIGA<br>LGPTGR         | 2.32 | 2,004.02 |
| ATP | 6006 | SPTLC2 protein                                    | gi 1487455<br>25,gi 14964<br>2795                 | 62,871.50  | 100.00% | 3 | 4 | 4 | 0.04% | 8.72%  | LLKDAIV<br>YGQPR                    | 2.99 | 1,372.79 |
| ATP | 6006 | SPTLC2 protein                                    | gi 1487455<br>25,gi 14964<br>2795                 | 62,871.50  | 100.00% | 3 | 4 | 4 | 0.04% | 8.72%  | NIGVVV<br>VGFPAT<br>PIESR           | 4.47 | 1,868.06 |
| ATP | 6006 | PREDIC TED:<br>similar to neuropili n-1 isoform 1 | gi 7663221<br>2,gi 766322<br>26                   | 102,993.80 | 100.00% | 6 | 7 | 8 | 0.08% | 8.67%  | DKLNPQ<br>STYSEA                    | 2.59 | 1,352.63 |
| ATP | 6006 | PREDIC TED:<br>similar to neuropili n-1 isoform 1 | gi 7663221<br>2,gi 766322<br>26                   | 102,993.80 | 100.00% | 6 | 7 | 8 | 0.08% | 8.67%  | FVTAVG<br>TQGAISK                   | 3.39 | 1,278.71 |
| ATP | 6006 | PREDIC TED:<br>similar to neuropili n-1 isoform 1 | gi 7663221<br>2,gi 766322<br>26                   | 102,993.80 | 100.00% | 6 | 7 | 8 | 0.08% | 8.67%  | IAPSSFV<br>SSGPFLF<br>IK            | 3.29 | 1,696.93 |
| ATP | 6006 | PREDIC TED:<br>similar to neuropili n-1 isoform 1 | gi 7663221<br>2,gi 766322<br>26                   | 102,993.80 | 100.00% | 6 | 7 | 8 | 0.08% | 8.67%  | SFEGNN<br>NYDTPE<br>LR              | 3.3  | 1,655.73 |
| ATP | 6006 | PREDIC TED:<br>similar to neuropili n-1 isoform 1 | gi 7663221<br>2,gi 766322<br>26                   | 102,993.80 | 100.00% | 6 | 7 | 8 | 0.08% | 8.67%  | TGPIQDH<br>TGDGNFI<br>YSQADE<br>NQK | 4.87 | 2,535.14 |

|     |      |                                                 |                                          |            |         |   |   |    |       |        |                                                    |          |
|-----|------|-------------------------------------------------|------------------------------------------|------------|---------|---|---|----|-------|--------|----------------------------------------------------|----------|
| ATP | 6006 | PREDICTED:<br>similar to neuropilin-1 isoform 1 | gi 7663221<br>2,gi 766322                | 102,993.80 | 100.00% | 6 | 7 | 8  | 0.08% | 8.67%  | TGPIQDH 3.49<br>TG DGNFI<br>YSQADE<br>NQKGK        | 2,720.26 |
| ATP | 6006 | PREDICTED:<br>similar to pincher isoform 1      | gi 7662746<br>6                          | 61,009.90  | 100.00% | 8 | 8 | 10 | 0.11% | 20.60% | FGNAFL 2.64<br>NR                                  | 938.4842 |
| ATP | 6006 | PREDICTED:<br>similar to pincher isoform 1      | gi 7662746<br>6                          | 61,009.90  | 100.00% | 8 | 8 | 10 | 0.11% | 20.60% | FHEFHSP 3.1<br>ALEDAD<br>FENKPMI<br>LLVGQY<br>STGK | 3,436.65 |
| ATP | 6006 | PREDICTED:<br>similar to pincher isoform 1      | gi 7662746<br>6                          | 61,009.90  | 100.00% | 8 | 8 | 10 | 0.11% | 20.60% | GGTGAD 3.52<br>PVQTVT<br>GGLR                      | 1,485.77 |
| ATP | 6006 | PREDICTED:<br>similar to pincher isoform 1      | gi 7662746<br>6                          | 61,009.90  | 100.00% | 8 | 8 | 10 | 0.11% | 20.60% | LFEAEA 2.96<br>QDLFR                               | 1,338.67 |
| ATP | 6006 | PREDICTED:<br>similar to pincher isoform 1      | gi 7662746<br>6                          | 61,009.90  | 100.00% | 8 | 8 | 10 | 0.11% | 20.60% | LFEAEA 3.81<br>QDLFRDI<br>QSLPQK                   | 2,248.16 |
| ATP | 6006 | PREDICTED:<br>similar to pincher isoform 1      | gi 7662746<br>6                          | 61,009.90  | 100.00% | 8 | 8 | 10 | 0.11% | 20.60% | LIEAVDN 3.33<br>MLTNK                              | 1,376.71 |
| ATP | 6006 | PREDICTED:<br>similar to pincher isoform 1      | gi 7662746<br>6                          | 61,009.90  | 100.00% | 8 | 8 | 10 | 0.11% | 20.60% | SISIISP 3.81<br>GILSGEK                            | 1,515.83 |
| ATP | 6006 | PREDICTED:<br>similar to pincher isoform 1      | gi 7662746<br>6                          | 61,009.90  | 100.00% | 8 | 8 | 10 | 0.11% | 20.60% | YLLEQD 3.31<br>FPGMR                               | 1,384.66 |
| ATP | 6006 | RRAS2 protein                                   | gi 1487439<br>16,gi 14994<br>4707        | 23,381.60  | 99.80%  | 2 | 2 | 2  | 0.02% | 13.70% | LDILDTA 2.78<br>GQEEFG<br>AMR                      | 1,781.84 |
| ATP | 6006 | RRAS2 protein                                   | gi 1487439<br>16,gi 14994<br>4707        | 23,381.60  | 99.80%  | 2 | 2 | 2  | 0.02% | 13.70% | MNVVDQ 2.56<br>AFHELV<br>R                         | 1,474.71 |
| ATP | 6006 | adenine nucleotide                              | gi 1864249<br>6,gi 321893<br>34,gi 74355 | 32,938.60  | 99.80%  | 2 | 3 | 4  | 0.04% | 26.80% | AAAYFGI 2.86<br>YDTAK                              | 1,219.60 |
| ATP | 6006 | adenine nucleotide                              | gi 1864249<br>6,gi 321893<br>34,gi 74355 | 32,938.60  | 99.80%  | 2 | 3 | 4  | 0.04% | 26.80% | DFLAGG 4.45<br>VAAAIS<br>K                         | 1,219.67 |
| ATP | 6006 | adenine nucleotide                              | gi 1864249<br>6,gi 321893<br>34,gi 74355 | 32,938.60  | 99.80%  | 2 | 3 | 4  | 0.04% | 26.80% | GMGGAF 2.91<br>VLVLYD<br>EIK                       | 1,627.84 |



|     |      |                                                                       |                                          |           |         |   |   |   |       |        |                                             |          |
|-----|------|-----------------------------------------------------------------------|------------------------------------------|-----------|---------|---|---|---|-------|--------|---------------------------------------------|----------|
| ATP | 6006 | adenine<br>nucleotide<br>34,gi 74355<br>translocat<br>or 2            | gi 1864249<br>6,gi 321893                | 32,938.60 | 99.80%  | 2 | 3 | 4 | 0.04% | 26.80% | GMGGAF 2.88<br>VLVLYD<br>EIKK               | 1,755.94 |
| ATP | 6006 | adenine<br>nucleotide<br>34,gi 74355<br>translocat<br>or 2            | gi 1864249<br>6,gi 321893                | 32,938.60 | 99.80%  | 2 | 3 | 4 | 0.04% | 26.80% | GMGGAF 2.87<br>VLVLYD<br>EIKKFT             | 2,004.05 |
| ATP | 6006 | adenine<br>nucleotide<br>34,gi 74355<br>translocat<br>or 2            | gi 1864249<br>6,gi 321893                | 32,938.60 | 99.80%  | 2 | 3 | 4 | 0.04% | 26.80% | QIFLGGV 2.46<br>DKR                         | 1,132.65 |
| ATP | 6006 | adenine<br>nucleotide<br>34,gi 74355<br>translocat<br>or 2            | gi 1864249<br>6,gi 321893                | 32,938.60 | 99.80%  | 2 | 3 | 4 | 0.04% | 26.80% | VKLLLQ 3.83<br>VQHASK                       | 1,363.84 |
| ATP | 6006 | adenine<br>nucleotide<br>34,gi 74355<br>translocat<br>or 2            | gi 1864249<br>6,gi 321893                | 32,938.60 | 99.80%  | 2 | 3 | 4 | 0.04% | 26.80% | YFPTQA 4.71<br>LNFAFK                       | 1,446.74 |
| ATP | 6006 | adenine<br>nucleotide<br>34,gi 74355<br>translocat<br>or 2            | gi 1864249<br>6,gi 321893                | 32,938.60 | 99.80%  | 2 | 3 | 4 | 0.04% | 26.80% | YFPTQA 3.09<br>LNFAFK<br>DK                 | 1,689.86 |
| ATP | 6006 | adenine<br>nucleotide<br>34,gi 74355<br>translocat<br>or 2            | gi 1864249<br>6,gi 321893                | 32,938.60 | 99.80%  | 2 | 3 | 4 | 0.04% | 26.80% | YFPTQA 3.89<br>LNFAFK<br>DKYK               | 1,981.02 |
| ATP | 6006 | PREDIC<br>TED:<br>similar to<br>mKIAA4<br>036<br>protein<br>isoform 2 | gi 1199175<br>18                         | 67,513.30 | 100.00% | 2 | 2 | 2 | 0.02% | 6.13%  | SISHYHE 4.11<br>TLGEAL<br>QGVELE<br>FSGLDIK | 2,872.44 |
| ATP | 6006 | PREDIC<br>TED:<br>similar to<br>mKIAA4<br>036<br>protein<br>isoform 2 | gi 1199175<br>18                         | 67,513.30 | 100.00% | 2 | 2 | 2 | 0.02% | 6.13%  | YLDPSFF 1.79<br>QHR                         | 1,309.63 |
| ATP | 6006 | hypotheti<br>cal<br>protein<br>LOC516<br>334                          | gi 1154962<br>52,gi 15155<br>6904,gi 957 | 43,057.10 | 99.80%  | 2 | 2 | 2 | 0.02% | 3.62%  | ETAFEE 2.36<br>DVQLPR                       | 1,433.69 |
| ATP | 6006 | hypotheti<br>cal<br>protein<br>LOC516<br>334                          | gi 1154962<br>52,gi 15155<br>6904,gi 957 | 43,057.10 | 99.80%  | 2 | 2 | 2 | 0.02% | 3.62%  | MRETAF 3.29<br>EEDVQL<br>PR                 | 1,736.83 |

|     |      |                                                                                                                |            |           |         |   |    |    |       |        |                   |      |          |
|-----|------|----------------------------------------------------------------------------------------------------------------|------------|-----------|---------|---|----|----|-------|--------|-------------------|------|----------|
| ATP | 6006 | PREDIC TED: 20<br>similar to Transmembrane emp24 domain-containing protein 2 precursor (Membrane protein p24A) | gi 1946746 | 22,715.40 | 99.80%  | 2 | 3  | 4  | 0.04% | 12.40% | IVMFTID IGEAPK    | 3.39 | 1,449.77 |
| ATP | 6006 | PREDIC TED: 20<br>similar to Transmembrane emp24 domain-containing protein 2 precursor (Membrane protein p24A) | gi 1946746 | 22,715.40 | 99.80%  | 2 | 3  | 4  | 0.04% | 12.40% | YTFAAH MDGTY K    | 3.8  | 1,420.62 |
| ATP | 6006 | PREDIC TED: 7<br>integrin, beta 3 (platelet glycoprotein IIIa, antigen CD61)                                   | gi 7667065 | 86,518.30 | 100.00% | 7 | 10 | 12 | 0.13% | 8.16%  | EATSTFT NITYR     | 3.05 | 1,403.68 |
| ATP | 6006 | isoform 1<br>PREDIC TED: 7<br>integrin, beta 3 (platelet glycoprotein IIIa, antigen CD61)                      | gi 7667065 | 86,518.30 | 100.00% | 7 | 10 | 12 | 0.13% | 8.16%  | EATSTFT NITYRG T  | 3.3  | 1,561.75 |
| ATP | 6006 | isoform 1<br>PREDIC TED: 7<br>integrin, beta 3 (platelet glycoprotein IIIa, antigen CD61)                      | gi 7667065 | 86,518.30 | 100.00% | 7 | 10 | 12 | 0.13% | 8.16%  | GTGDSS QITQVSP QR | 3.07 | 1,560.76 |

|     |      |                                                                                   |            |           |         |   |    |    |       |        |                              |      |          |
|-----|------|-----------------------------------------------------------------------------------|------------|-----------|---------|---|----|----|-------|--------|------------------------------|------|----------|
| ATP | 6006 | PREDIC TED: integrin, beta 3 (platelet glycoprotein IIIa, antigen CD61) isoform 1 | gi 7667065 | 86,518.30 | 100.00% | 7 | 10 | 12 | 0.13% | 8.16%  | HVLTLT DQVTR                 | 3.33 | 1,282.71 |
| ATP | 6006 | PREDIC TED: integrin, beta 3 (platelet glycoprotein IIIa, antigen CD61) isoform 1 | gi 7667065 | 86,518.30 | 100.00% | 7 | 10 | 12 | 0.13% | 8.16%  | ILEARPL SDKGTG DSSQITQ VSPQR | 6.21 | 2,683.40 |
| ATP | 6006 | PREDIC TED: integrin, beta 3 (platelet glycoprotein IIIa, antigen CD61) isoform 1 | gi 7667065 | 86,518.30 | 100.00% | 7 | 10 | 12 | 0.13% | 8.16%  | LRPDDS KIFSVQV R             | 3.15 | 1,659.92 |
| ATP | 6006 | PREDIC TED: integrin, beta 3 (platelet glycoprotein IIIa, antigen CD61) isoform 1 | gi 7667065 | 86,518.30 | 100.00% | 7 | 10 | 12 | 0.13% | 8.16%  | PLSDKG TGDSSQI TQVSPQ R      | 4.55 | 2,101.05 |
| ATP | 6006 | heat shock 90kDa protein 1, beta                                                  | gi 1186018 | 83,238.20 | 100.00% | 5 | 7  | 9  | 0.09% | 11.50% | ADLVNN LGTIAK                | 3.14 | 1,228.69 |
| ATP | 6006 | heat shock 90kDa protein 1, beta                                                  | gi 1186018 | 83,238.20 | 100.00% | 5 | 7  | 9  | 0.09% | 11.50% | ELISNAS DALDKI R             | 2.98 | 1,544.83 |
| ATP | 6006 | heat shock 90kDa protein 1, beta                                                  | gi 1186018 | 83,238.20 | 100.00% | 5 | 7  | 9  | 0.09% | 11.50% | GVVDSE DLPLNIS R             | 4.44 | 1,513.79 |
| ATP | 6006 | heat shock 90kDa protein 1, beta                                                  | gi 1186018 | 83,238.20 | 100.00% | 5 | 7  | 9  | 0.09% | 11.50% | HLEINPD HPIVETL R            | 2.58 | 1,782.95 |
| ATP | 6006 | heat shock 90kDa protein 1, beta                                                  | gi 1186018 | 83,238.20 | 100.00% | 5 | 7  | 9  | 0.09% | 11.50% | NPDDITQ EEYGEF YK            | 3.35 | 1,847.80 |
| ATP | 6006 | heat shock 90kDa protein 1, beta                                                  | gi 1186018 | 83,238.20 | 100.00% | 5 | 7  | 9  | 0.09% | 11.50% | TLTLVD TGIGMT K              | 3.76 | 1,365.73 |

|     |      |                                                                     |                                                  |           |         |   |   |   |       |        |                                            |          |
|-----|------|---------------------------------------------------------------------|--------------------------------------------------|-----------|---------|---|---|---|-------|--------|--------------------------------------------|----------|
| ATP | 6006 | Solute carrier family 1 (neutral amino acid transporter), member 5  | gi 115305216,gi 15145909,gi 21541958,gi 27807087 | 56,431.20 | 99.80%  | 2 | 2 | 2 | 0.02% | 4.45%  | EVLDSFL 2.49<br>DLVR                       | 1,305.71 |
| ATP | 6006 | Solute carrier family 1 (neutral amino acid transporter), member 5  | gi 115305216,gi 15145909,gi 21541958,gi 27807087 | 56,431.20 | 99.80%  | 2 | 2 | 2 | 0.02% | 4.45%  | NIFPSNL 2.38<br>VSAAFR                     | 1,435.77 |
| ATP | 6006 | PREDICTED: protein disulfide isomerase family A, member 6 isoform 7 | gi 119903961,gi 151553573                        | 64,497.70 | 100.00% | 5 | 5 | 6 | 0.06% | 15.60% | ALDLFS 3.53<br>DNAPPP<br>ELLEIINE<br>DVAK  | 2,623.35 |
| ATP | 6006 | PREDICTED: protein disulfide isomerase family A, member 6 isoform 7 | gi 119903961,gi 151553573                        | 64,497.70 | 100.00% | 5 | 5 | 6 | 0.06% | 15.60% | GSFSEQ 3.15<br>GINEFLR                     | 1,483.72 |
| ATP | 6006 | PREDICTED: protein disulfide isomerase family A, member 6 isoform 7 | gi 119903961,gi 151553573                        | 64,497.70 | 100.00% | 5 | 5 | 6 | 0.06% | 15.60% | IFQKGES 4.25<br>PVDYDG<br>GR               | 1,667.80 |
| ATP | 6006 | PREDICTED: protein disulfide isomerase family A, member 6 isoform 7 | gi 119903961,gi 151553573                        | 64,497.70 | 100.00% | 5 | 5 | 6 | 0.06% | 15.60% | LAAVDA 3.08<br>TVNQVL<br>ASR               | 1,527.85 |
| ATP | 6006 | PREDICTED: protein disulfide isomerase family A, member 6 isoform 7 | gi 119903961,gi 151553573                        | 64,497.70 | 100.00% | 5 | 5 | 6 | 0.06% | 15.60% | VGAVDA 3.11<br>DKHQSL<br>GGQYGV<br>QGFPTIK | 2,572.32 |

|     |      |                                                                                  |                                                                                               |            |         |   |   |    |       |        |                                                                   |      |          |
|-----|------|----------------------------------------------------------------------------------|-----------------------------------------------------------------------------------------------|------------|---------|---|---|----|-------|--------|-------------------------------------------------------------------|------|----------|
| ATP | 6006 | Deoxyribonuclease 71 I-like 1                                                    | gi 1515535                                                                                    | 35,175.30  | 99.80%  | 2 | 3 | 3  | 0.03% | 7.91%  | IVLHGE<br>HLQSLLR                                                 | 2.51 | 1,514.88 |
| ATP | 6006 | Deoxyribonuclease 71 I-like 1                                                    | gi 1515535                                                                                    | 35,175.30  | 99.80%  | 2 | 3 | 3  | 0.03% | 7.91%  | VAREPV<br>LDTLVK                                                  | 3.57 | 1,339.79 |
| ATP | 6011 | TIMM23 protein                                                                   | gi 1340251<br>49,gi 13994<br>7578,gi 215<br>274655                                            | 21,809.90  | 100.00% | 3 | 3 | 5  | 0.05% | 32.50% | NVQILN<br>MVTR                                                    | 3.56 | 1,203.65 |
| ATP | 6011 | TIMM23 protein                                                                   | gi 1340251<br>49,gi 13994<br>7578,gi 215<br>274655                                            | 21,809.90  | 100.00% | 3 | 3 | 5  | 0.05% | 32.50% | TTGGLA<br>GFFGAG<br>GAGYSH<br>ADLAGV<br>PLTGMN<br>PLSPYLN<br>VDPR | 4.95 | 4,034.97 |
| ATP | 6011 | TIMM23 protein                                                                   | gi 1340251<br>49,gi 13994<br>7578,gi 215<br>274655                                            | 21,809.90  | 100.00% | 3 | 3 | 5  | 0.05% | 32.50% | YLVQDT<br>DEFILPT<br>GANK                                         | 2.94 | 1,923.97 |
| ATP | 6011 | Chain B, Subcomplex Of The Stator Of Bovine Mitochondrial Atp Synthase           | gi 1105910<br>27,gi 11059<br>1030,gi 114<br>686,gi 2780<br>7305,gi 599<br>873,gi 7435<br>6487 | 18,544.10  | 100.00% | 2 | 3 | 8  | 0.09% | 19.40% | IQEYEKE<br>LEK                                                    | 3.64 | 1,308.67 |
| ATP | 6011 | Chain B, Subcomplex Of The Stator Of Bovine Mitochondrial Atp Synthase           | gi 1105910<br>27,gi 11059<br>1030,gi 114<br>686,gi 2780<br>7305,gi 599<br>873,gi 7435<br>6487 | 18,544.10  | 100.00% | 2 | 3 | 8  | 0.09% | 19.40% | NIIPFDQ<br>MTIEDL<br>NEVFPE<br>TK                                 | 3.64 | 2,509.22 |
| ATP | 6011 | PREDICTED: integrin, alpha 5 (fibronectin receptor, alpha polypeptide) isoform 3 | gi 1946670<br>41                                                                              | 119,589.00 | 100.00% | 5 | 8 | 14 | 0.15% | 8.79%  | AQILLDC<br>GEDNIC<br>VPDLQL<br>EVFGEQ<br>NHVYLG<br>DK             | 3.8  | 3,687.77 |
| ATP | 6011 | PREDICTED: integrin, alpha 5 (fibronectin receptor, alpha polypeptide) isoform 3 | gi 1946670<br>41                                                                              | 119,589.00 | 100.00% | 5 | 8 | 14 | 0.15% | 8.79%  | DLDGNG<br>YDPLIVG<br>SFGVDK                                       | 3.78 | 1,980.96 |

|     |      |                                                                                                       |                                                                                                 |            |         |   |   |    |       |        |                                       |      |          |
|-----|------|-------------------------------------------------------------------------------------------------------|-------------------------------------------------------------------------------------------------|------------|---------|---|---|----|-------|--------|---------------------------------------|------|----------|
| ATP | 6011 | PREDICTED:<br>integrin,<br>alpha 5<br>(fibronectin<br>receptor,<br>alpha<br>polypeptide)<br>isoform 3 | gi 194667041                                                                                    | 119,589.00 | 100.00% | 5 | 8 | 14 | 0.15% | 8.79%  | LAGMEP<br>TPTLTLT<br>GQDEFG<br>R      | 5.17 | 2,150.04 |
| ATP | 6011 | PREDICTED:<br>integrin,<br>alpha 5<br>(fibronectin<br>receptor,<br>alpha<br>polypeptide)<br>isoform 3 | gi 194667041                                                                                    | 119,589.00 | 100.00% | 5 | 8 | 14 | 0.15% | 8.79%  | TIQDFDQ<br>ILSK                       | 2.64 | 1,339.73 |
| ATP | 6011 | PREDICTED:<br>integrin,<br>alpha 5<br>(fibronectin<br>receptor,<br>alpha<br>polypeptide)<br>isoform 3 | gi 194667041                                                                                    | 119,589.00 | 100.00% | 5 | 8 | 14 | 0.15% | 8.79%  | VTAPPE<br>AEYSGL<br>VR                | 3.06 | 1,488.77 |
| ATP | 6011 | caveolin-1                                                                                            | gi 1840144,<br>gi 2493547,<br>gi 2780671<br>5,gi 383227<br>01,gi 56181<br>138                   | 20,577.50  | 100.00% | 3 | 5 | 11 | 0.12% | 19.70% | ASFTTFT<br>VTK                        | 2.93 | 1,102.58 |
| ATP | 6011 | caveolin-1                                                                                            | gi 1840144,<br>gi 2493547,<br>gi 2780671<br>5,gi 383227<br>01,gi 56181<br>138                   | 20,577.50  | 100.00% | 3 | 5 | 11 | 0.12% | 19.70% | YVDSEG<br>HLYTVPI<br>R                | 3.73 | 1,648.83 |
| ATP | 6011 | caveolin-1                                                                                            | gi 1840144,<br>gi 2493547,<br>gi 2780671<br>5,gi 383227<br>01,gi 56181<br>138                   | 20,577.50  | 100.00% | 3 | 5 | 11 | 0.12% | 19.70% | YVDSEG<br>HLYTVPI<br>REQGNI<br>YKPNNK | 4.4  | 2,934.47 |
| ATP | 6011 | RTN3<br>protein                                                                                       | gi 115305093,gi 12213<br>2179,gi 146<br>231798,gi 1<br>51554368,gi 32880223,<br>gi 3832759<br>4 | 25,478.60  | 99.80%  | 2 | 4 | 4  | 0.04% | 5.49%  | TQIDHY<br>VGIAR                       | 2.67 | 1,272.67 |
| ATP | 6011 | RTN3<br>protein                                                                                       | gi 115305093,gi 12213<br>2179,gi 146<br>231798,gi 1<br>51554368,gi 32880223,<br>gi 3832759<br>4 | 25,478.60  | 99.80%  | 2 | 4 | 4  | 0.04% | 5.49%  | YKTQID<br>HYVGIA<br>R                 | 2.99 | 1,563.83 |

|     |      |                                                                             |                                        |            |         |    |    |    |       |        |                                            |      |          |
|-----|------|-----------------------------------------------------------------------------|----------------------------------------|------------|---------|----|----|----|-------|--------|--------------------------------------------|------|----------|
| ATP | 6011 | LMAN2 protein                                                               | gi 151553875,gi 155372333              | 40,385.10  | 100.00% | 4  | 5  | 6  | 0.07% | 17.00% | DNFHGL<br>AIFLDY<br>PNDETT<br>ER           | 4.33 | 2,468.14 |
| ATP | 6011 | LMAN2 protein                                                               | gi 151553875,gi 155372333              | 40,385.10  | 100.00% | 4  | 5  | 6  | 0.07% | 17.00% | DNVDDP<br>TGNFR                            | 2.85 | 1,249.54 |
| ATP | 6011 | LMAN2 protein                                                               | gi 151553875,gi 155372333              | 40,385.10  | 100.00% | 4  | 5  | 6  | 0.07% | 17.00% | LPTGY<br>FGASAG<br>TGDLSD<br>NHDIISM<br>K  | 5.1  | 2,746.27 |
| ATP | 6011 | LMAN2 protein                                                               | gi 151553875,gi 155372333              | 40,385.10  | 100.00% | 4  | 5  | 6  | 0.07% | 17.00% | SPKDNV<br>DDPTGN<br>FR                     | 3.83 | 1,561.72 |
| ATP | 6011 | PREDICTED: 1 similar to LOC512938 protein                                   | gi 61810221                            | 18,067.50  | 99.80%  | 2  | 2  | 2  | 0.02% | 22.20% | MPATLL<br>VTVHSE<br>KWKPM<br>TFPAHP<br>GDR | 2.19 | 2,962.51 |
| ATP | 6011 | PREDICTED: 1 similar to LOC512938 protein                                   | gi 61810221                            | 18,067.50  | 99.80%  | 2  | 2  | 2  | 0.02% | 22.20% | SIHLTLK<br>VVK                             | 2.58 | 1,137.74 |
| ATP | 6011 | PREDICTED: 73 similar to polypeptide of N-acetylgalactosaminyltransferase 2 | gi 119918373                           | 64,740.20  | 100.00% | 3  | 3  | 3  | 0.03% | 8.41%  | EILVDD<br>YSNDPE<br>DGALLG<br>K            | 3.24 | 2,176.07 |
| ATP | 6011 | PREDICTED: 73 similar to polypeptide of N-acetylgalactosaminyltransferase 2 | gi 119918373                           | 64,740.20  | 100.00% | 3  | 3  | 3  | 0.03% | 8.41%  | NKFNQV<br>ESDKLR                           | 2.93 | 1,477.78 |
| ATP | 6011 | PREDICTED: 73 similar to polypeptide of N-acetylgalactosaminyltransferase 2 | gi 119918373                           | 64,740.20  | 100.00% | 3  | 3  | 3  | 0.03% | 8.41%  | QHPYTF<br>PGGSGT<br>VFAR                   | 3.5  | 1,721.84 |
| ATP | 6011 | ATPase, Na+/K+ transporting, alpha 1 polypeptide                            | gi 115305284,gi 116003819,gi 122132194 | 112,627.60 | 100.00% | 18 | 24 | 46 | 0.50% | 23.80% | ADIGVA<br>MGIAGS<br>DVSK                   | 4.57 | 1,506.75 |
| ATP | 6011 | ATPase, Na+/K+ transporting, alpha 1 polypeptide                            | gi 115305284,gi 116003819,gi 122132194 | 112,627.60 | 100.00% | 18 | 24 | 46 | 0.50% | 23.80% | AVAGDA<br>SESALLK                          | 3.79 | 1,231.65 |

|     |      |                                                  |                                        |            |         |    |    |    |       |        |                              |      |          |
|-----|------|--------------------------------------------------|----------------------------------------|------------|---------|----|----|----|-------|--------|------------------------------|------|----------|
| ATP | 6011 | ATPase, Na+/K+ transporting, alpha 1 polypeptide | gi 115305284.gi 116003819.gi 122132194 | 112,627.60 | 100.00% | 18 | 24 | 46 | 0.50% | 23.80% | AVFQAN QDNLPIK               | 4.16 | 1,570.86 |
| ATP | 6011 | ATPase, Na+/K+ transporting, alpha 1 polypeptide | gi 115305284.gi 116003819.gi 122132194 | 112,627.60 | 100.00% | 18 | 24 | 46 | 0.50% | 23.80% | AVFQAN QDNLPIKR              | 2.36 | 1,726.96 |
| ATP | 6011 | ATPase, Na+/K+ transporting, alpha 1 polypeptide | gi 115305284.gi 116003819.gi 122132194 | 112,627.60 | 100.00% | 18 | 24 | 46 | 0.50% | 23.80% | DKYEPA AVSEHGDK              | 3.75 | 1,545.72 |
| ATP | 6011 | ATPase, Na+/K+ transporting, alpha 1 polypeptide | gi 115305284.gi 116003819.gi 122132194 | 112,627.60 | 100.00% | 18 | 24 | 46 | 0.50% | 23.80% | EQPLDE ELKDAF QNAYLE LGGLGER | 3.88 | 2,834.38 |
| ATP | 6011 | ATPase, Na+/K+ transporting, alpha 1 polypeptide | gi 115305284.gi 116003819.gi 122132194 | 112,627.60 | 100.00% | 18 | 24 | 46 | 0.50% | 23.80% | GVGIISE GNETVE DIAAR         | 5.71 | 1,829.92 |
| ATP | 6011 | ATPase, Na+/K+ transporting, alpha 1 polypeptide | gi 115305284.gi 116003819.gi 122132194 | 112,627.60 | 100.00% | 18 | 24 | 46 | 0.50% | 23.80% | IVEIPFNS TNK                 | 2.38 | 1,261.68 |
| ATP | 6011 | ATPase, Na+/K+ transporting, alpha 1 polypeptide | gi 115305284.gi 116003819.gi 122132194 | 112,627.60 | 100.00% | 18 | 24 | 46 | 0.50% | 23.80% | KADIGV AMGIAG SDVSK          | 5.55 | 1,634.84 |
| ATP | 6011 | ATPase, Na+/K+ transporting, alpha 1 polypeptide | gi 115305284.gi 116003819.gi 122132194 | 112,627.60 | 100.00% | 18 | 24 | 46 | 0.50% | 23.80% | LNIPVSQ VNPR                 | 3.25 | 1,236.71 |
| ATP | 6011 | ATPase, Na+/K+ transporting, alpha 1 polypeptide | gi 115305284.gi 116003819.gi 122132194 | 112,627.60 | 100.00% | 18 | 24 | 46 | 0.50% | 23.80% | LSLDEL HR                    | 2.64 | 982.5317 |
| ATP | 6011 | ATPase, Na+/K+ transporting, alpha 1 polypeptide | gi 115305284.gi 116003819.gi 122132194 | 112,627.60 | 100.00% | 18 | 24 | 46 | 0.50% | 23.80% | MSINAE EVVVGDLVEVK           | 3    | 1,846.95 |



|     |      |                                                  |                                          |            |         |    |    |    |       |        |                                     |      |          |
|-----|------|--------------------------------------------------|------------------------------------------|------------|---------|----|----|----|-------|--------|-------------------------------------|------|----------|
| ATP | 6011 | ATPase, Na+/K+ transporting, alpha 1 polypeptide | gi 115305284,gi 116003819,gi 122132194   | 112,627.60 | 100.00% | 18 | 24 | 46 | 0.50% | 23.80% | NMVPQQ<br>ALVIR                     | 2.63 | 1,284.71 |
| ATP | 6011 | ATPase, Na+/K+ transporting, alpha 1 polypeptide | gi 115305284,gi 116003819,gi 122132194   | 112,627.60 | 100.00% | 18 | 24 | 46 | 0.50% | 23.80% | QAADMI<br>LLDDNF<br>ASIVTGV<br>EEGR | 3.57 | 2,480.20 |
| ATP | 6011 | ATPase, Na+/K+ transporting, alpha 1 polypeptide | gi 115305284,gi 116003819,gi 122132194   | 112,627.60 | 100.00% | 18 | 24 | 46 | 0.50% | 23.80% | QGAIVA<br>VTGDGV<br>NDSPAL<br>KK    | 2.66 | 1,940.05 |
| ATP | 6011 | ATPase, Na+/K+ transporting, alpha 1 polypeptide | gi 115305284,gi 116003819,gi 122132194   | 112,627.60 | 100.00% | 18 | 24 | 46 | 0.50% | 23.80% | SPDFTNE<br>NPLETR                   | 4.44 | 1,519.70 |
| ATP | 6011 | ATPase, Na+/K+ transporting, alpha 1 polypeptide | gi 115305284,gi 116003819,gi 122132194   | 112,627.60 | 100.00% | 18 | 24 | 46 | 0.50% | 23.80% | VDNSSL<br>TGESEP<br>QTR             | 3.75 | 1,619.75 |
| ATP | 6011 | ATPase, Na+/K+ transporting, alpha 1 polypeptide | gi 115305284,gi 116003819,gi 122132194   | 112,627.60 | 100.00% | 18 | 24 | 46 | 0.50% | 23.80% | VIMVTG<br>DHPITAK                   | 4.2  | 1,397.75 |
| ATP | 6011 | COL18A1 protein                                  | gi 133778103,gi 134085613,gi 157742960   | 135,049.70 | 99.80%  | 2  | 2  | 2  | 0.02% | 2.33%  | LFVAQA<br>GGADPE<br>KFQGLIS<br>ELR  | 4.66 | 2,346.25 |
| ATP | 6011 | COL18A1 protein                                  | gi 133778103,gi 134085613,gi 157742960   | 135,049.70 | 99.80%  | 2  | 2  | 2  | 0.02% | 2.33%  | LQDLYSI<br>VR                       | 3.04 | 1,106.62 |
| ATP | 6011 | NADH dehydrogenase                               | gi 256,gi 28461255,gi 400533,gi 73587329 | 20,946.90  | 100.00% | 5  | 6  | 7  | 0.08% | 27.80% | AFDLLV<br>DRPVTL<br>VR              | 2.88 | 1,613.94 |
| ATP | 6011 | NADH dehydrogenase                               | gi 256,gi 28461255,gi 400533,gi 73587329 | 20,946.90  | 100.00% | 5  | 6  | 7  | 0.08% | 27.80% | DYKVDQ<br>EIVNIHQE<br>R             | 3.88 | 1,861.97 |
| ATP | 6011 | NADH dehydrogenase                               | gi 256,gi 28461255,gi 400533,gi 73587329 | 20,946.90  | 100.00% | 5  | 6  | 7  | 0.08% | 27.80% | RTPAPSP<br>QTSLPNP<br>ITYLTK        | 2.97 | 2,182.19 |
| ATP | 6011 | NADH dehydrogenase                               | gi 256,gi 28461255,gi 400533,gi 73587329 | 20,946.90  | 100.00% | 5  | 6  | 7  | 0.08% | 27.80% | TPAPSPQ<br>TSLPNPI<br>TYLTK         | 4.98 | 2,026.09 |
| ATP | 6011 | NADH dehydrogenase                               | gi 256,gi 28461255,gi 400533,gi 73587329 | 20,946.90  | 100.00% | 5  | 6  | 7  | 0.08% | 27.80% | VDQEIV<br>NIQER                     | 2.99 | 1,455.78 |

|     |      |                                                                                                                                                                                                               |                                                                                 |           |        |   |   |   |       |        |                               |          |
|-----|------|---------------------------------------------------------------------------------------------------------------------------------------------------------------------------------------------------------------|---------------------------------------------------------------------------------|-----------|--------|---|---|---|-------|--------|-------------------------------|----------|
| ATP | 6011 | ribosomal protein L18                                                                                                                                                                                         | gi 5985845<br>9,gi 627520<br>12,gi 75060<br>915,gi 7577<br>5560,gi 895<br>73893 | 21,518.10 | 99.80% | 2 | 2 | 3 | 0.03% | 12.20% | ILTFDQL 4.2<br>ALDSPK         | 1,460.80 |
| ATP | 6011 | ribosomal protein L18                                                                                                                                                                                         | gi 5985845<br>9,gi 627520<br>12,gi 75060<br>915,gi 7577<br>5560,gi 895<br>73893 | 21,518.10 | 99.80% | 2 | 2 | 3 | 0.03% | 12.20% | TNRPPLS 3.36<br>LSR           | 1,140.65 |
| ATP | 6011 | RecName :<br>Full=Isocitrate dehydrogenase<br>[NADP], mitochondrial;<br>Short=IDH;<br>AltName: Full=Oxalosuccinate decarboxylase;<br>AltName: Full=NA DP(+)-specific ICDH;<br>AltName: Full=IDP ;<br>AltName: | gi 1098919<br>34,gi 28461<br>205,gi 430,<br>gi 7358732                          | 50,807.00 | 99.80% | 2 | 2 | 2 | 0.02% | 6.42%  | LNEHFL 4.25<br>NTSDFL<br>DTIK | 1,906.95 |
| ATP | 6011 | RecName :<br>Full=Isocitrate dehydrogenase<br>[NADP], mitochondrial;<br>Short=IDH;<br>AltName: Full=Oxalosuccinate decarboxylase;<br>AltName: Full=NA DP(+)-specific ICDH;<br>AltName: Full=IDP ;<br>AltName: | gi 1098919<br>34,gi 28461<br>205,gi 430,<br>gi 7358732                          | 50,807.00 | 99.80% | 2 | 2 | 2 | 0.02% | 6.42%  | TIEAEAA 4.09<br>HGTVTR        | 1,355.69 |

|     |      |                                 |                                                                                                                   |           |         |   |    |    |       |        |                                                                      |          |
|-----|------|---------------------------------|-------------------------------------------------------------------------------------------------------------------|-----------|---------|---|----|----|-------|--------|----------------------------------------------------------------------|----------|
| ATP | 6011 | endothelin-convertinogen enzyme | gi1092971, gi1248291, 88, gi19035, 9620, gi229, 9388, gi229, 9395, gi307, 94312, gi53, 5075, gi688, 290, gi897602 | 85,603.70 | 100.00% | 8 | 10 | 15 | 0.16% | 15.40% | AFEESLS 3.06<br>TLK                                                  | 1,124.58 |
| ATP | 6011 | endothelin-convertinogen enzyme | gi1092971, gi1248291, 88, gi19035, 9620, gi229, 9388, gi229, 9395, gi307, 94312, gi53, 5075, gi688, 290, gi897602 | 85,603.70 | 100.00% | 8 | 10 | 15 | 0.16% | 15.40% | APNRDQ 2.75<br>WSMTPP<br>MVNAY<br>YSPTKN<br>EIVFPAG<br>ILQAPFY<br>TR | 4,487.20 |
| ATP | 6011 | endothelin-convertinogen enzyme | gi1092971, gi1248291, 88, gi19035, 9620, gi229, 9388, gi229, 9395, gi307, 94312, gi53, 5075, gi688, 290, gi897602 | 85,603.70 | 100.00% | 8 | 10 | 15 | 0.16% | 15.40% | ELDKVF 3.44<br>NDYTAV<br>PDLYFE<br>NAMR                              | 2,666.24 |
| ATP | 6011 | endothelin-convertinogen enzyme | gi1092971, gi1248291, 88, gi19035, 9620, gi229, 9388, gi229, 9395, gi307, 94312, gi53, 5075, gi688, 290, gi897602 | 85,603.70 | 100.00% | 8 | 10 | 15 | 0.16% | 15.40% | HTLGENI 4.21<br>ADNGGL<br>K                                          | 1,438.73 |
| ATP | 6011 | endothelin-convertinogen enzyme | gi1092971, gi1248291, 88, gi19035, 9620, gi229, 9388, gi229, 9395, gi307, 94312, gi53, 5075, gi688, 290, gi897602 | 85,603.70 | 100.00% | 8 | 10 | 15 | 0.16% | 15.40% | NEIVFPA 4.85<br>GILQAPF<br>YTR                                       | 1,936.03 |
| ATP | 6011 | endothelin-convertinogen enzyme | gi1092971, gi1248291, 88, gi19035, 9620, gi229, 9388, gi229, 9395, gi307, 94312, gi53, 5075, gi688, 290, gi897602 | 85,603.70 | 100.00% | 8 | 10 | 15 | 0.16% | 15.40% | TPESHE 4.79<br>GLITDPH<br>SPSR                                       | 1,946.92 |
| ATP | 6011 | endothelin-convertinogen enzyme | gi1092971, gi1248291, 88, gi19035, 9620, gi229, 9388, gi229, 9395, gi307, 94312, gi53, 5075, gi688, 290, gi897602 | 85,603.70 | 100.00% | 8 | 10 | 15 | 0.16% | 15.40% | VFNDYT 3.45<br>AVPDLY<br>FENAMR                                      | 2,181.00 |

|     |      |                                                |                                                                                                    |           |         |   |    |    |       |        |                                       |          |
|-----|------|------------------------------------------------|----------------------------------------------------------------------------------------------------|-----------|---------|---|----|----|-------|--------|---------------------------------------|----------|
| ATP | 6011 | endothelin-converting enzyme                   | gi 1092971,gi 1248291,gi 190359620,gi 2299388,gi 2299395,gi 30794312,gi 535075,gi 688290,gi 897602 | 85,603.70 | 100.00% | 8 | 10 | 15 | 0.16% | 15.40% | VLTYGL 3.61<br>NYMVQL<br>GK           | 1,614.86 |
| ATP | 6011 | RecName : Full=60S ribosomal protein L5        | gi 108862056,gi 119900687,gi 119905361,gi 61552973,gi 75775327,gi 78369655                         | 34,262.40 | 99.80%  | 2 | 2  | 2  | 0.02% | 8.75%  | GAVDGG 2.24<br>LSIPHST<br>K           | 1,338.70 |
| ATP | 6011 | RecName : Full=60S ribosomal protein L5        | gi 108862056,gi 119900687,gi 119905361,gi 61552973,gi 75775327,gi 78369655                         | 34,262.40 | 99.80%  | 2 | 2  | 2  | 0.02% | 8.75%  | YLIEEDE 3.08<br>DAYKK                 | 1,515.72 |
| ATP | 6011 | secretory carrier membrane protein 3 isoform 1 | gi 61553277,gi 71649517,gi 73586519,gi 78369651                                                    | 38,348.80 | 99.80%  | 2 | 2  | 2  | 0.02% | 10.40% | AQQEFA 4.19<br>AGVFSN<br>PAVR         | 1,691.85 |
| ATP | 6011 | secretory carrier membrane protein 3 isoform 1 | gi 61553277,gi 71649517,gi 73586519,gi 78369651                                                    | 38,348.80 | 99.80%  | 2 | 2  | 2  | 0.02% | 10.40% | NYGSYS 5.84<br>TQASTA<br>AATAEL<br>LK | 2,047.00 |
| ATP | 6011 | PRKCD BP protein                               | gi 133778193,gi 134085797,gi 187611336                                                             | 27,468.60 | 100.00% | 5 | 7  | 14 | 0.15% | 23.10% | GHAAPT 3.39<br>PTPVKPP<br>R           | 1,425.80 |
| ATP | 6011 | PRKCD BP protein                               | gi 133778193,gi 134085797,gi 187611336                                                             | 27,468.60 | 100.00% | 5 | 7  | 14 | 0.15% | 23.10% | LATMLE 3<br>TLR                       | 1,063.58 |
| ATP | 6011 | PRKCD BP protein                               | gi 133778193,gi 134085797,gi 187611336                                                             | 27,468.60 | 100.00% | 5 | 7  | 14 | 0.15% | 23.10% | LEANHG 3.11<br>LLVAR                  | 1,192.68 |
| ATP | 6011 | PRKCD BP protein                               | gi 133778193,gi 134085797,gi 187611336                                                             | 27,468.60 | 100.00% | 5 | 7  | 14 | 0.15% | 23.10% | RIQSNLG 3.14<br>ALSR                  | 1,214.70 |
| ATP | 6011 | PRKCD BP protein                               | gi 133778193,gi 134085797,gi 187611336                                                             | 27,468.60 | 100.00% | 5 | 7  | 14 | 0.15% | 23.10% | SHDTTS 5.17<br>NTLAQL<br>LAK          | 1,599.83 |
| ATP | 6011 | vacuolar system associated protein-60          | gi 1215746,gi 152941134,gi 2493459,gi 33340013,gi 41386727,gi 74356454                             | 60,133.40 | 99.80%  | 2 | 3  | 5  | 0.05% | 4.50%  | SLEDQV 2.76<br>EVLK                   | 1,187.63 |

|     |      |                                                           |                                                                                                                                         |           |         |    |    |     |       |        |                        |      |          |
|-----|------|-----------------------------------------------------------|-----------------------------------------------------------------------------------------------------------------------------------------|-----------|---------|----|----|-----|-------|--------|------------------------|------|----------|
| ATP | 6011 | vacuolar system associate d protein-60                    | gi 1215746, gi 1529411, gi 24934, gi 33340, gi 4138, gi 743, gi 56454                                                                   | 60,133.40 | 99.80%  | 2  | 3  | 5   | 0.05% | 4.50%  | TLKEEA<br>EKPEEA<br>AK | 2.53 | 1,572.81 |
| ATP | 6011 | PREDIC TED: similar to Histone H4 replacem ent CG3379- PC | gi 1199157, gi 09, gi 11991, gi 5719, gi 119, gi 915738, gi 7, gi 6613952, gi 76616306, gi 76631252, gi 7663126, gi 2, gi 766317, gi 17 | 11,349.70 | 100.00% | 11 | 17 | 137 | 1.49% | 56.30% | DAVTTYT<br>EHAK        | 2.35 | 1,134.54 |
| ATP | 6011 | PREDIC TED: similar to Histone H4 replacem ent CG3379- PC | gi 1199157, gi 09, gi 11991, gi 5719, gi 119, gi 915738, gi 7, gi 6613952, gi 76616306, gi 76631252, gi 7663126, gi 2, gi 766317, gi 17 | 11,349.70 | 100.00% | 11 | 17 | 137 | 1.49% | 56.30% | DNIQGIT<br>KPAIR       | 3    | 1,325.75 |
| ATP | 6011 | PREDIC TED: similar to Histone H4 replacem ent CG3379- PC | gi 1199157, gi 09, gi 11991, gi 5719, gi 119, gi 915738, gi 7, gi 6613952, gi 76616306, gi 76631252, gi 7663126, gi 2, gi 766317, gi 17 | 11,349.70 | 100.00% | 11 | 17 | 137 | 1.49% | 56.30% | ISGLIYE<br>ETR         | 4.17 | 1,180.62 |
| ATP | 6011 | PREDIC TED: similar to Histone H4 replacem ent CG3379- PC | gi 1199157, gi 09, gi 11991, gi 5719, gi 119, gi 915738, gi 7, gi 6613952, gi 76616306, gi 76631252, gi 7663126, gi 2, gi 766317, gi 17 | 11,349.70 | 100.00% | 11 | 17 | 137 | 1.49% | 56.30% | KTVTAM<br>DVVYAL<br>K  | 4.78 | 1,438.80 |
| ATP | 6011 | PREDIC TED: similar to Histone H4 replacem ent CG3379- PC | gi 1199157, gi 09, gi 11991, gi 5719, gi 119, gi 915738, gi 7, gi 6613952, gi 76616306, gi 76631252, gi 7663126, gi 2, gi 766317, gi 17 | 11,349.70 | 100.00% | 11 | 17 | 137 | 1.49% | 56.30% | KTVTAM<br>DVVYAL<br>KR | 5.23 | 1,610.89 |
| ATP | 6011 | PREDIC TED: similar to Histone H4 replacem ent CG3379- PC | gi 1199157, gi 09, gi 11991, gi 5719, gi 119, gi 915738, gi 7, gi 6613952, gi 76616306, gi 76631252, gi 7663126, gi 2, gi 766317, gi 17 | 11,349.70 | 100.00% | 11 | 17 | 137 | 1.49% | 56.30% | RISGLIY<br>EETR        | 3.09 | 1,336.72 |



|     |      |                                                     |                                   |           |         |    |    |    |       |        |                                                    |          |
|-----|------|-----------------------------------------------------|-----------------------------------|-----------|---------|----|----|----|-------|--------|----------------------------------------------------|----------|
| ATP | 6011 | inner<br>membran<br>e protein,<br>mitochon<br>drial | gi 1529412<br>06                  | 83,035.60 | 100.00% | 13 | 16 | 24 | 0.26% | 24.40% | AVDEAA 2.53<br>DALLK                               | 1,115.59 |
| ATP | 6011 | inner<br>membran<br>e protein,<br>mitochon<br>drial | gi 1529412<br>06                  | 83,035.60 | 100.00% | 13 | 16 | 24 | 0.26% | 24.40% | ELDSITP 3.47<br>EVLPGW<br>K                        | 1,583.83 |
| ATP | 6011 | inner<br>membran<br>e protein,<br>mitochon<br>drial | gi 1529412<br>06                  | 83,035.60 | 100.00% | 13 | 16 | 24 | 0.26% | 24.40% | KAVDEA 3.49<br>ADALLK                              | 1,243.69 |
| ATP | 6011 | inner<br>membran<br>e protein,<br>mitochon<br>drial | gi 1529412<br>06                  | 83,035.60 | 100.00% | 13 | 16 | 24 | 0.26% | 24.40% | LAEQEL 2.92<br>QFR                                 | 1,133.60 |
| ATP | 6011 | inner<br>membran<br>e protein,<br>mitochon<br>drial | gi 1529412<br>06                  | 83,035.60 | 100.00% | 13 | 16 | 24 | 0.26% | 24.40% | LSQEQV 2.14<br>DNFTLDI<br>NTAYAR                   | 2,198.07 |
| ATP | 6011 | inner<br>membran<br>e protein,<br>mitochon<br>drial | gi 1529412<br>06                  | 83,035.60 | 100.00% | 13 | 16 | 24 | 0.26% | 24.40% | MKTASA 3.95<br>DLPTVPL<br>GSAVEAI<br>R             | 2,143.14 |
| ATP | 6011 | inner<br>membran<br>e protein,<br>mitochon<br>drial | gi 1529412<br>06                  | 83,035.60 | 100.00% | 13 | 16 | 24 | 0.26% | 24.40% | QHIALAL 4.04<br>EK                                 | 1,022.60 |
| ATP | 6011 | inner<br>membran<br>e protein,<br>mitochon<br>drial | gi 1529412<br>06                  | 83,035.60 | 100.00% | 13 | 16 | 24 | 0.26% | 24.40% | QKGDTS 3.61<br>ASTTAG<br>DTLSVP<br>APVVQH<br>EELIK | 2,979.53 |
| ATP | 6011 | inner<br>membran<br>e protein,<br>mitochon<br>drial | gi 1529412<br>06                  | 83,035.60 | 100.00% | 13 | 16 | 24 | 0.26% | 24.40% | SVIENAK 3.16<br>KEEVAG<br>AK                       | 1,572.86 |
| ATP | 6011 | inner<br>membran<br>e protein,<br>mitochon<br>drial | gi 1529412<br>06                  | 83,035.60 | 100.00% | 13 | 16 | 24 | 0.26% | 24.40% | TASADL 4.39<br>PTVPLGS<br>AVEAIR                   | 1,868.01 |
| ATP | 6011 | inner<br>membran<br>e protein,<br>mitochon<br>drial | gi 1529412<br>06                  | 83,035.60 | 100.00% | 13 | 16 | 24 | 0.26% | 24.40% | TDHPET 4.01<br>GEGKPK<br>PATSEEA<br>SSTSVR         | 2,598.23 |
| ATP | 6011 | inner<br>membran<br>e protein,<br>mitochon<br>drial | gi 1529412<br>06                  | 83,035.60 | 100.00% | 13 | 16 | 24 | 0.26% | 24.40% | VQEQL 3.59<br>KYEFEQ<br>DLSEK                      | 2,142.02 |
| ATP | 6011 | inner<br>membran<br>e protein,<br>mitochon<br>drial | gi 1529412<br>06                  | 83,035.60 | 100.00% | 13 | 16 | 24 | 0.26% | 24.40% | VVSQYH 4.67<br>ELVVQA<br>R                         | 1,527.83 |
| ATP | 6011 | SCARB2<br>protein                                   | gi 1515561<br>35,gi 15612<br>0953 | 53,968.70 | 99.80%  | 2  | 2  | 3  | 0.03% | 6.49%  | GQGSTD 2.56<br>EGTADE<br>RAPLIR                    | 1,872.90 |

|     |      |                                              |                                                             |           |         |    |    |    |       |        |                                          |      |          |
|-----|------|----------------------------------------------|-------------------------------------------------------------|-----------|---------|----|----|----|-------|--------|------------------------------------------|------|----------|
| ATP | 6011 | SCARB2 protein                               | gi 151556135,gi 156120953                                   | 53,968.70 | 99.80%  | 2  | 2  | 3  | 0.03% | 6.49%  | HDVSPY<br>FGLFYG<br>K                    | 3.46 | 1,529.74 |
| ATP | 6011 | Chromosome 1 open reading frame 77 ortholog  | gi 74354304,gi 78369392,gi 85540961                         | 26,409.90 | 99.80%  | 2  | 2  | 2  | 0.02% | 11.70% | EQLDNQ<br>LDAYMS<br>K                    | 3.5  | 1,570.71 |
| ATP | 6011 | Chromosome 1 open reading frame 77 ortholog  | gi 74354304,gi 78369392,gi 85540961                         | 26,409.90 | 99.80%  | 2  | 2  | 2  | 0.02% | 11.70% | LAQQME<br>NRPSVQ<br>AALK                 | 2.76 | 1,799.94 |
| ATP | 6011 | ATAD1 protein                                | gi 154426126,gi 76671592                                    | 41,750.40 | 99.80%  | 2  | 3  | 3  | 0.03% | 11.40% | EYVNST<br>SEESH<br>EDEIRPV<br>QQDLH<br>R | 3.28 | 3,140.42 |
| ATP | 6011 | ATAD1 protein                                | gi 154426126,gi 76671592                                    | 41,750.40 | 99.80%  | 2  | 3  | 3  | 0.03% | 11.40% | LQPSIIFI<br>DEIDSFL<br>R                 | 3.51 | 1,906.03 |
| ATP | 6011 | Mitochondrial carrier homolog 2 (C. elegans) | gi 151554706,gi 28603744,gi 59858227,gi 67461083,gi 7959093 | 33,276.60 | 100.00% | 4  | 6  | 6  | 0.07% | 20.80% | GLFTGL<br>TPR                            | 2.27 | 961.5467 |
| ATP | 6011 | Mitochondrial carrier homolog 2 (C. elegans) | gi 151554706,gi 28603744,gi 59858227,gi 67461083,gi 7959093 | 33,276.60 | 100.00% | 4  | 6  | 6  | 0.07% | 20.80% | QVCQLP<br>GLFCYA<br>QHIASID<br>GKR       | 2.86 | 2,447.23 |
| ATP | 6011 | Mitochondrial carrier homolog 2 (C. elegans) | gi 151554706,gi 28603744,gi 59858227,gi 67461083,gi 7959093 | 33,276.60 | 100.00% | 4  | 6  | 6  | 0.07% | 20.80% | SAATLIT<br>HPFHVIT<br>LR                 | 2.38 | 1,777.01 |
| ATP | 6011 | Mitochondrial carrier homolog 2 (C. elegans) | gi 151554706,gi 28603744,gi 59858227,gi 67461083,gi 7959093 | 33,276.60 | 100.00% | 4  | 6  | 6  | 0.07% | 20.80% | VLIQVQ<br>YEPLAPT<br>VGR                 | 3.67 | 1,711.97 |
| ATP | 6011 | PREDICTED: similar to cytoskeletal protein 4 | gi 119892686                                                | 64,511.50 | 100.00% | 29 | 38 | 80 | 0.87% | 46.20% | AAALRP<br>EEDGAF<br>RPSEAFE<br>TLQK      | 2.89 | 2,533.27 |
| ATP | 6011 | PREDICTED: similar to cytoskeletal protein 4 | gi 119892686                                                | 64,511.50 | 100.00% | 29 | 38 | 80 | 0.87% | 46.20% | AEESAA<br>HLPEEIR                        | 2.67 | 1,451.71 |



|     |      |                                                                |            |           |         |    |    |    |       |        |                    |      |          |
|-----|------|----------------------------------------------------------------|------------|-----------|---------|----|----|----|-------|--------|--------------------|------|----------|
| ATP | 6011 | PREDIC TED: 86<br>similar to cytoskeleton-associated protein 4 | gi 1198926 | 64,511.50 | 100.00% | 29 | 38 | 80 | 0.87% | 46.20% | AEESAA HLPEEIR R   | 2.84 | 1,607.81 |
| ATP | 6011 | PREDIC TED: 86<br>similar to cytoskeleton-associated protein 4 | gi 1198926 | 64,511.50 | 100.00% | 29 | 38 | 80 | 0.87% | 46.20% | ASVGQV ESDLK       | 3.36 | 1,132.58 |
| ATP | 6011 | PREDIC TED: 86<br>similar to cytoskeleton-associated protein 4 | gi 1198926 | 64,511.50 | 100.00% | 29 | 38 | 80 | 0.87% | 46.20% | DFTSLEN TVEER      | 2.85 | 1,439.66 |
| ATP | 6011 | PREDIC TED: 86<br>similar to cytoskeleton-associated protein 4 | gi 1198926 | 64,511.50 | 100.00% | 29 | 38 | 80 | 0.87% | 46.20% | DLSDGIH VVK        | 2.65 | 1,082.58 |
| ATP | 6011 | PREDIC TED: 86<br>similar to cytoskeleton-associated protein 4 | gi 1198926 | 64,511.50 | 100.00% | 29 | 38 | 80 | 0.87% | 46.20% | EAADSE HHTLQA LTEK | 3.64 | 1,779.85 |
| ATP | 6011 | PREDIC TED: 86<br>similar to cytoskeleton-associated protein 4 | gi 1198926 | 64,511.50 | 100.00% | 29 | 38 | 80 | 0.87% | 46.20% | EELGQG LQGVEQ K    | 3.87 | 1,414.72 |
| ATP | 6011 | PREDIC TED: 86<br>similar to cytoskeleton-associated protein 4 | gi 1198926 | 64,511.50 | 100.00% | 29 | 38 | 80 | 0.87% | 46.20% | ELVSLK QEQQR       | 3.57 | 1,357.74 |
| ATP | 6011 | PREDIC TED: 86<br>similar to cytoskeleton-associated protein 4 | gi 1198926 | 64,511.50 | 100.00% | 29 | 38 | 80 | 0.87% | 46.20% | ERDFTSL ENTVEE R   | 4.13 | 1,724.81 |

|     |      |                                                                |            |           |         |    |    |    |       |        |                            |      |          |
|-----|------|----------------------------------------------------------------|------------|-----------|---------|----|----|----|-------|--------|----------------------------|------|----------|
| ATP | 6011 | PREDIC TED: 86<br>similar to cytoskeleton-associated protein 4 | gi 1198926 | 64,511.50 | 100.00% | 29 | 38 | 80 | 0.87% | 46.20% | EVVKEI<br>QTSVK            | 3.26 | 1,259.72 |
| ATP | 6011 | PREDIC TED: 86<br>similar to cytoskeleton-associated protein 4 | gi 1198926 | 64,511.50 | 100.00% | 29 | 38 | 80 | 0.87% | 46.20% | FKEAAD<br>SEHHTL<br>QALTEK | 4.28 | 2,055.01 |
| ATP | 6011 | PREDIC TED: 86<br>similar to cytoskeleton-associated protein 4 | gi 1198926 | 64,511.50 | 100.00% | 29 | 38 | 80 | 0.87% | 46.20% | GLGEAQ<br>LSLAGD<br>VDELK  | 5.13 | 1,714.89 |
| ATP | 6011 | PREDIC TED: 86<br>similar to cytoskeleton-associated protein 4 | gi 1198926 | 64,511.50 | 100.00% | 29 | 38 | 80 | 0.87% | 46.20% | GLGEAQ<br>LSLAGD<br>VDELKR | 3.3  | 1,870.99 |
| ATP | 6011 | PREDIC TED: 86<br>similar to cytoskeleton-associated protein 4 | gi 1198926 | 64,511.50 | 100.00% | 29 | 38 | 80 | 0.87% | 46.20% | GLLEDL<br>RNLDLR           | 2.32 | 1,428.74 |
| ATP | 6011 | PREDIC TED: 86<br>similar to cytoskeleton-associated protein 4 | gi 1198926 | 64,511.50 | 100.00% | 29 | 38 | 80 | 0.87% | 46.20% | GLLEDL<br>RNLDLR<br>LFVK   | 2.16 | 1,916.06 |
| ATP | 6011 | PREDIC TED: 86<br>similar to cytoskeleton-associated protein 4 | gi 1198926 | 64,511.50 | 100.00% | 29 | 38 | 80 | 0.87% | 46.20% | IETNENN<br>LESAK           | 3.23 | 1,361.65 |
| ATP | 6011 | PREDIC TED: 86<br>similar to cytoskeleton-associated protein 4 | gi 1198926 | 64,511.50 | 100.00% | 29 | 38 | 80 | 0.87% | 46.20% | ILRAEES<br>AAHLPE<br>EIR   | 3.04 | 1,833.98 |

|     |      |                                                                |            |           |         |    |    |    |       |        |                                |      |          |
|-----|------|----------------------------------------------------------------|------------|-----------|---------|----|----|----|-------|--------|--------------------------------|------|----------|
| ATP | 6011 | PREDIC TED: 86<br>similar to cytoskeleton-associated protein 4 | gi 1198926 | 64,511.50 | 100.00% | 29 | 38 | 80 | 0.87% | 46.20% | LEEELG QLK                     | 2.94 | 1,058.57 |
| ATP | 6011 | PREDIC TED: 86<br>similar to cytoskeleton-associated protein 4 | gi 1198926 | 64,511.50 | 100.00% | 29 | 38 | 80 | 0.87% | 46.20% | LQNEILK DLSDGIH VVK            | 5.61 | 1,921.08 |
| ATP | 6011 | PREDIC TED: 86<br>similar to cytoskeleton-associated protein 4 | gi 1198926 | 64,511.50 | 100.00% | 29 | 38 | 80 | 0.87% | 46.20% | LQSVED GVQAAR                  | 3.61 | 1,272.65 |
| ATP | 6011 | PREDIC TED: 86<br>similar to cytoskeleton-associated protein 4 | gi 1198926 | 64,511.50 | 100.00% | 29 | 38 | 80 | 0.87% | 46.20% | QREELG QGLQGV EQK              | 2.7  | 1,698.88 |
| ATP | 6011 | PREDIC TED: 86<br>similar to cytoskeleton-associated protein 4 | gi 1198926 | 64,511.50 | 100.00% | 29 | 38 | 80 | 0.87% | 46.20% | RLEEEL GQLK                    | 3.49 | 1,214.67 |
| ATP | 6011 | PREDIC TED: 86<br>similar to cytoskeleton-associated protein 4 | gi 1198926 | 64,511.50 | 100.00% | 29 | 38 | 80 | 0.87% | 46.20% | SINDNIAI FTDVQK                | 5.02 | 1,577.82 |
| ATP | 6011 | PREDIC TED: 86<br>similar to cytoskeleton-associated protein 4 | gi 1198926 | 64,511.50 | 100.00% | 29 | 38 | 80 | 0.87% | 46.20% | STIQTME SDVYTE VK              | 3.75 | 1,746.81 |
| ATP | 6011 | PREDIC TED: 86<br>similar to cytoskeleton-associated protein 4 | gi 1198926 | 64,511.50 | 100.00% | 29 | 38 | 80 | 0.87% | 46.20% | STIQTME SDVYTE VKELVS LKQEQQ R | 2.97 | 3,085.54 |

|     |      |                                                         |                                                                        |           |         |    |    |    |       |        |                    |      |          |
|-----|------|---------------------------------------------------------|------------------------------------------------------------------------|-----------|---------|----|----|----|-------|--------|--------------------|------|----------|
| ATP | 6011 | PREDICTED: similar to cytoskeleton-associated protein 4 | gi 119892686                                                           | 64,511.50 | 100.00% | 29 | 38 | 80 | 0.87% | 46.20% | TAVDSL VAYSVK      | 3.82 | 1,252.68 |
| ATP | 6011 | PREDICTED: similar to cytoskeleton-associated protein 4 | gi 119892686                                                           | 64,511.50 | 100.00% | 29 | 38 | 80 | 0.87% | 46.20% | VQEQVH TLLGR       | 3.04 | 1,279.71 |
| ATP | 6011 | PREDICTED: similar to cytoskeleton-associated protein 4 | gi 119892686                                                           | 64,511.50 | 100.00% | 29 | 38 | 80 | 0.87% | 46.20% | VQSLQA TFGTFES LVR | 5.82 | 1,782.94 |
| ATP | 6011 | similar to peptidylprolyl isomerase A (cyclophilin A)   | gi 28189771,gi 58760424,gi 75948                                       | 17,851.80 | 100.00% | 3  | 4  | 4  | 0.04% | 16.50% | FDDENFI LK         | 2.56 | 1,140.56 |
| ATP | 6011 | similar to peptidylprolyl isomerase A (cyclophilin A)   | gi 28189771,gi 58760424,gi 75948                                       | 17,851.80 | 100.00% | 3  | 4  | 4  | 0.04% | 16.50% | SIYGEKF DDENFIL K  | 4.3  | 1,817.90 |
| ATP | 6011 | similar to peptidylprolyl isomerase A (cyclophilin A)   | gi 28189771,gi 58760424,gi 75948                                       | 17,851.80 | 100.00% | 3  | 4  | 4  | 0.04% | 16.50% | VSFELFA DKVPK      | 3.45 | 1,379.76 |
| ATP | 6011 | Clusterin                                               | gi 109939936,gi 116530,gi 146231734,gi 151555910,gi 163115,gi 27806907 | 51,096.70 | 100.00% | 4  | 4  | 5  | 0.05% | 9.11%  | KLLSSS EEAK        | 2.47 | 1,230.73 |
| ATP | 6011 | Clusterin                                               | gi 109939936,gi 116530,gi 146231734,gi 151555910,gi 163115,gi 27806907 | 51,096.70 | 100.00% | 4  | 4  | 5  | 0.05% | 9.11%  | KLLSSS EEAKK       | 4.26 | 1,358.83 |
| ATP | 6011 | Clusterin                                               | gi 109939936,gi 116530,gi 146231734,gi 151555910,gi 163115,gi 27806907 | 51,096.70 | 100.00% | 4  | 4  | 5  | 0.05% | 9.11%  | LYDQLL QSYQQK      | 4.15 | 1,526.79 |

|     |      |                                                                |                                                                        |           |         |    |    |    |       |        |                                      |      |          |
|-----|------|----------------------------------------------------------------|------------------------------------------------------------------------|-----------|---------|----|----|----|-------|--------|--------------------------------------|------|----------|
| ATP | 6011 | Clusterin                                                      | gi 109939936,gi 116530,gi 146231734,gi 151555910,gi 163115,gi 27806907 | 51,096.70 | 100.00% | 4  | 4  | 5  | 0.05% | 9.11%  | RPQDTQ<br>YYSPFSS<br>FPR             | 3.84 | 1,975.93 |
| ATP | 6011 | TMED7 protein                                                  | gi 134025246,gi 157428116                                              | 25,318.00 | 100.00% | 3  | 3  | 4  | 0.04% | 18.70% | KQYDSY<br>TFTASK                     | 3.73 | 1,438.68 |
| ATP | 6011 | TMED7 protein                                                  | gi 134025246,gi 157428116                                              | 25,318.00 | 100.00% | 3  | 3  | 4  | 0.04% | 18.70% | SVIDYQT<br>HFR                       | 2.76 | 1,265.63 |
| ATP | 6011 | TMED7 protein                                                  | gi 134025246,gi 157428116                                              | 25,318.00 | 100.00% | 3  | 3  | 4  | 0.04% | 18.70% | TVYFDF<br>QVGEDP<br>PLFPSEN<br>R     | 3.26 | 2,357.11 |
| ATP | 6011 | Prohibiti<br>n                                                 | gi 74354527,gi 77736091,gi 88909243                                    | 29,786.60 | 100.00% | 11 | 14 | 23 | 0.25% | 61.00% | AAELIAN<br>SLATAG<br>DGLIELR         | 5.2  | 1,998.09 |
| ATP | 6011 | Prohibiti<br>n                                                 | gi 74354527,gi 77736091,gi 88909243                                    | 29,786.60 | 100.00% | 11 | 14 | 23 | 0.25% | 61.00% | AATFGLI<br>LDDVSL<br>THLTFG<br>K     | 2.79 | 2,119.14 |
| ATP | 6011 | Prohibiti<br>n                                                 | gi 74354527,gi 77736091,gi 88909243                                    | 29,786.60 | 100.00% | 11 | 14 | 23 | 0.25% | 61.00% | DLQNVN<br>ITLR                       | 4.09 | 1,185.66 |
| ATP | 6011 | Prohibiti<br>n                                                 | gi 74354527,gi 77736091,gi 88909243                                    | 29,786.60 | 100.00% | 11 | 14 | 23 | 0.25% | 61.00% | FDAGELI<br>TQR                       | 4.08 | 1,149.59 |
| ATP | 6011 | Prohibiti<br>n                                                 | gi 74354527,gi 77736091,gi 88909243                                    | 29,786.60 | 100.00% | 11 | 14 | 23 | 0.25% | 61.00% | FGLALA<br>VAGGVV<br>NSALYN<br>VDAGHR | 4.75 | 2,371.25 |
| ATP | 6011 | Prohibiti<br>n                                                 | gi 74354527,gi 77736091,gi 88909243                                    | 29,786.60 | 100.00% | 11 | 14 | 23 | 0.25% | 61.00% | IFTSIGE<br>DYDER                     | 3.43 | 1,444.66 |
| ATP | 6011 | Prohibiti<br>n                                                 | gi 74354527,gi 77736091,gi 88909243                                    | 29,786.60 | 100.00% | 11 | 14 | 23 | 0.25% | 61.00% | ILFRPVA<br>SQLPR                     | 2.8  | 1,396.84 |
| ATP | 6011 | Prohibiti<br>n                                                 | gi 74354527,gi 77736091,gi 88909243                                    | 29,786.60 | 100.00% | 11 | 14 | 23 | 0.25% | 61.00% | KLEAAE<br>DIA YQLS<br>R              | 5.37 | 1,606.84 |
| ATP | 6011 | Prohibiti<br>n                                                 | gi 74354527,gi 77736091,gi 88909243                                    | 29,786.60 | 100.00% | 11 | 14 | 23 | 0.25% | 61.00% | NITYLPA<br>GQSVLL<br>QLPQ            | 4.45 | 1,855.03 |
| ATP | 6011 | Prohibiti<br>n                                                 | gi 74354527,gi 77736091,gi 88909243                                    | 29,786.60 | 100.00% | 11 | 14 | 23 | 0.25% | 61.00% | QVAQQE<br>AERARF<br>VVEK             | 2.98 | 1,888.00 |
| ATP | 6011 | Prohibiti<br>n                                                 | gi 74354527,gi 77736091,gi 88909243                                    | 29,786.60 | 100.00% | 11 | 14 | 23 | 0.25% | 61.00% | VLPSITT<br>EILK                      | 2.76 | 1,213.74 |
| ATP | 6011 | ras-<br>related<br>C3<br>botulinu<br>m toxin<br>substrate<br>1 | gi 27806443,gi 51702785,gi 6007014,gi 73587375                         | 21,432.60 | 99.90%  | 2  | 4  | 4  | 0.04% | 7.81%  | KLTPITY<br>PQGLAM<br>AK              | 2.53 | 1,647.91 |

|     |      |                                                   |                                                                                                                                          |           |         |   |   |   |       |        |                           |      |          |
|-----|------|---------------------------------------------------|------------------------------------------------------------------------------------------------------------------------------------------|-----------|---------|---|---|---|-------|--------|---------------------------|------|----------|
| ATP | 6011 | ras-related C3 botulinum toxin substrate 1        | gi 27806443,gi 51702785,gi 6007014,gi 73587375                                                                                           | 21,432.60 | 99.90%  | 2 | 4 | 4 | 0.04% | 7.81%  | LTPITYP<br>QGLAMA<br>K    | 3.61 | 1,519.82 |
| ATP | 6011 | Interferon induced transmembrane protein 1 (9-27) | gi 112362418,gi 118151192,gi 118151350,gi 18151354,gi 119919513,gi 14279576,gi 14279578,gi 148744152,gi 32480628,gi 73586549,gi 73587371 | 13,631.00 | 99.80%  | 2 | 2 | 3 | 0.03% | 13.70% | KMVGDI<br>TGAQSY<br>ASTAK | 3.87 | 1,743.86 |
| ATP | 6011 | Interferon induced transmembrane protein 1 (9-27) | gi 112362418,gi 118151192,gi 118151350,gi 18151354,gi 119919513,gi 14279576,gi 14279578,gi 148744152,gi 32480628,gi 73586549,gi 73587371 | 13,631.00 | 99.80%  | 2 | 2 | 3 | 0.03% | 13.70% | MVGDIT<br>GAQSYA<br>STAK  | 5.75 | 1,615.76 |
| ATP | 6011 | RecName : Full=Histone H1.1; AltName: Full=CT L-1 | gi 121903                                                                                                                                | 10,347.40 | 100.00% | 6 | 8 | 8 | 0.09% | 51.90% | ALAAAG<br>YDVEK           | 3.09 | 1,107.57 |
| ATP | 6011 | RecName : Full=Histone H1.1; AltName: Full=CT L-1 | gi 121903                                                                                                                                | 10,347.40 | 100.00% | 6 | 8 | 8 | 0.09% | 51.90% | ALAAAG<br>YDVEKN<br>NSR   | 4.17 | 1,578.79 |
| ATP | 6011 | RecName : Full=Histone H1.1; AltName: Full=CT L-1 | gi 121903                                                                                                                                | 10,347.40 | 100.00% | 6 | 8 | 8 | 0.09% | 51.90% | ASGPPV<br>SELITK          | 3.35 | 1,198.67 |

|     |      |                                                                                                                               |           |         |   |   |   |       |        |                                       |          |
|-----|------|-------------------------------------------------------------------------------------------------------------------------------|-----------|---------|---|---|---|-------|--------|---------------------------------------|----------|
| ATP | 6011 | RecName gi 121903<br>:<br>Full=Hist<br>one H1.1;<br>AltName:<br>Full=CT<br>L-1                                                | 10,347.40 | 100.00% | 6 | 8 | 8 | 0.09% | 51.90% | KASGPP 2.9<br>VSELITK                 | 1,326.76 |
| ATP | 6011 | RecName gi 121903<br>:<br>Full=Hist<br>one H1.1;<br>AltName:<br>Full=CT<br>L-1                                                | 10,347.40 | 100.00% | 6 | 8 | 8 | 0.09% | 51.90% | SETAPA 3.42<br>APAAAP<br>PAEK         | 1,478.75 |
| ATP | 6011 | RecName gi 121903<br>:<br>Full=Hist<br>one H1.1;<br>AltName:<br>Full=CT<br>L-1                                                | 10,347.40 | 100.00% | 6 | 8 | 8 | 0.09% | 51.90% | SGVSLA 3.19<br>ALKK                   | 973.6041 |
| ATP | 6011 | GNAS<br>complex<br>locus<br>gi 1139122<br>07_gi 74268<br>384                                                                  | 45,691.40 | 100.00% | 3 | 3 | 3 | 0.03% | 14.20% | ILHVNGF 3.76<br>NGEGGE<br>EDPQAA<br>R | 2,110.00 |
| ATP | 6011 | GNAS<br>complex<br>locus<br>gi 1139122<br>07_gi 74268<br>384                                                                  | 45,691.40 | 100.00% | 3 | 3 | 3 | 0.03% | 14.20% | LLLLGA 3.54<br>GESGK                  | 1,057.63 |
| ATP | 6011 | GNAS<br>complex<br>locus<br>gi 1139122<br>07_gi 74268<br>384                                                                  | 45,691.40 | 100.00% | 3 | 3 | 3 | 0.03% | 14.20% | YFIRDEF 1.88<br>LR                    | 1,258.66 |
| ATP | 6011 | GNAS<br>complex<br>locus<br>gi 1139122<br>07_gi 74268<br>384                                                                  | 45,691.40 | 100.00% | 3 | 3 | 3 | 0.03% | 14.20% | YTPPED 2.88<br>ATPEPG<br>EDPR         | 1,774.78 |
| ATP | 6011 | PREDIC<br>TED:<br>15<br>similar to<br>Transme<br>mbrane 9<br>superfami<br>ly<br>member<br>2<br>precursor<br>(p76),<br>partial | 72,962.00 | 100.00% | 3 | 4 | 5 | 0.05% | 4.40%  | IYYHVV 4.22<br>ETGSMG<br>AR           | 1,598.76 |
| ATP | 6011 | PREDIC<br>TED:<br>15<br>similar to<br>Transme<br>mbrane 9<br>superfami<br>ly<br>member<br>2<br>precursor<br>(p76),<br>partial | 72,962.00 | 100.00% | 3 | 4 | 5 | 0.05% | 4.40%  | PSENLG 4.25<br>QVLFGE<br>R            | 1,445.74 |

|     |      |                                                                                            |                                          |            |         |    |    |    |       |        |                                                    |          |
|-----|------|--------------------------------------------------------------------------------------------|------------------------------------------|------------|---------|----|----|----|-------|--------|----------------------------------------------------|----------|
| ATP | 6011 | PREDIC TED: 15<br>similar to Transmembrane 9 superfamily member 2 precursor (p76), partial | gi 1946719                               | 72,962.00  | 100.00% | 3  | 4  | 5  | 0.05% | 4.40%  | RPSENL 4.21<br>GQVLFGER                            | 1,601.84 |
| ATP | 6011 | interferon stimulate d gene 17 83<br>[Ovis aries]                                          | gi 1208240<br>2,gi 576191                | 17,482.10  | 100.00% | 3  | 3  | 3  | 0.03% | 22.90% | EVLQEG 3.96<br>VPLVHQ<br>GLK                       | 1,645.93 |
| ATP | 6011 | interferon stimulate d gene 17 83<br>[Ovis aries]                                          | gi 1208240<br>2,gi 576191                | 17,482.10  | 100.00% | 3  | 3  | 3  | 0.03% | 22.90% | INVPAFQ 2.79<br>QR                                 | 1,072.59 |
| ATP | 6011 | interferon stimulate d gene 17 83<br>[Ovis aries]                                          | gi 1208240<br>2,gi 576191                | 17,482.10  | 100.00% | 3  | 3  | 3  | 0.03% | 22.90% | MLGGEE 2.4<br>ILVPLR                               | 1,342.74 |
| ATP | 6011 | UPF0404 protein C11orf59 homolog                                                           | gi 1221403<br>64,gi 74267<br>677,gi 7773 | 17,713.10  | 99.80%  | 2  | 2  | 2  | 0.02% | 26.70% | LPPLPSL 5.1<br>TSQPHQ<br>VLASEP<br>VPFSDL<br>QQVSR | 3,267.74 |
| ATP | 6011 | UPF0404 protein C11orf59 homolog                                                           | gi 1221403<br>64,gi 74267<br>677,gi 7773 | 17,713.10  | 99.80%  | 2  | 2  | 2  | 0.02% | 26.70% | TDEQAL 3.92<br>LSSILAK                             | 1,388.76 |
| ATP | 6011 | Nucleobindin 2                                                                             | gi 1139121<br>61,gi 11549<br>6067        | 49,171.70  | 99.80%  | 2  | 2  | 2  | 0.02% | 8.19%  | LHDVNS 3.76<br>DGFLDE<br>QELEALF<br>TK             | 2,420.16 |
| ATP | 6011 | Nucleobindin 2                                                                             | gi 1139121<br>61,gi 11549<br>6067        | 49,171.70  | 99.80%  | 2  | 2  | 2  | 0.02% | 8.19%  | QVIDVL 3.39<br>ETDSHF<br>R                         | 1,558.79 |
| ATP | 6011 | RecName : Full=Cate nin alpha- 1                                                           | gi 1141492<br>56,gi 75773<br>615,gi 7836 | 100,117.00 | 100.00% | 11 | 11 | 13 | 0.14% | 20.40% | AEVQNL 4.03<br>GGELVV<br>SGVDSA<br>MSLIQA<br>AK    | 2,602.34 |
| ATP | 6011 | RecName : Full=Cate nin alpha- 1                                                           | gi 1141492<br>56,gi 75773<br>615,gi 7836 | 100,117.00 | 100.00% | 11 | 11 | 13 | 0.14% | 20.40% | AIMAQL 3.16<br>PQEQL                               | 1,272.66 |
| ATP | 6011 | RecName : Full=Cate nin alpha- 1                                                           | gi 1141492<br>56,gi 75773<br>615,gi 7836 | 100,117.00 | 100.00% | 11 | 11 | 13 | 0.14% | 20.40% | ALKPEV 2.64<br>DKLNIM<br>AAK                       | 1,656.94 |
| ATP | 6011 | RecName : Full=Cate nin alpha- 1                                                           | gi 1141492<br>56,gi 75773<br>615,gi 7836 | 100,117.00 | 100.00% | 11 | 11 | 13 | 0.14% | 20.40% | ESQFLKE 4.26<br>ELVAAV<br>EDVRK                    | 2,090.11 |
| ATP | 6011 | RecName : Full=Cate nin alpha- 1                                                           | gi 1141492<br>56,gi 75773<br>615,gi 7836 | 100,117.00 | 100.00% | 11 | 11 | 13 | 0.14% | 20.40% | IAEQVAS 3.31<br>FQEEK                              | 1,378.68 |



|     |      |                                                                                                                     |            |         |    |    |    |       |        |                                                     |          |
|-----|------|---------------------------------------------------------------------------------------------------------------------|------------|---------|----|----|----|-------|--------|-----------------------------------------------------|----------|
| ATP | 6011 | RecName gi 1141492 : 56,gi 75773 Full=Cate 615,gi 7836 nin alpha- 9272 1                                            | 100,117.00 | 100.00% | 11 | 11 | 13 | 0.14% | 20.40% | NAGTEQ 3.06<br>DLGIQY<br>K                          | 1,436.70 |
| ATP | 6011 | RecName gi 1141492 : 56,gi 75773 Full=Cate 615,gi 7836 nin alpha- 9272 1                                            | 100,117.00 | 100.00% | 11 | 11 | 13 | 0.14% | 20.40% | NLMNAV 3.33<br>VQTVK                                | 1,232.67 |
| ATP | 6011 | RecName gi 1141492 : 56,gi 75773 Full=Cate 615,gi 7836 nin alpha- 9272 1                                            | 100,117.00 | 100.00% | 11 | 11 | 13 | 0.14% | 20.40% | QIIVDPL 2.96<br>SFSEER                              | 1,532.80 |
| ATP | 6011 | RecName gi 1141492 : 56,gi 75773 Full=Cate 615,gi 7836 nin alpha- 9272 1                                            | 100,117.00 | 100.00% | 11 | 11 | 13 | 0.14% | 20.40% | TSVQTE 3.85<br>DDQLIA<br>GQSAR                      | 1,818.88 |
| ATP | 6011 | RecName gi 1141492 : 56,gi 75773 Full=Cate 615,gi 7836 nin alpha- 9272 1                                            | 100,117.00 | 100.00% | 11 | 11 | 13 | 0.14% | 20.40% | VIHVVTS 4.51<br>EMDNYE<br>PGVYTE<br>K               | 2,326.09 |
| ATP | 6011 | RecName gi 1141492 : 56,gi 75773 Full=Cate 615,gi 7836 nin alpha- 9272 1                                            | 100,117.00 | 100.00% | 11 | 11 | 13 | 0.14% | 20.40% | VLTDVAV 4.51<br>DDITSID<br>DFLAVS<br>ENHILED<br>VNK | 3,200.58 |
| ATP | 6011 | VAMP (vesicle-associate d membran e protein)-associate d protein A, 33kDa gi 1113046 48,gi 11549 6338,gi 121 957506 | 27,838.90  | 99.80%  | 2  | 4  | 6  | 0.07% | 11.20% | FKGPF 4.52<br>DVVTN<br>LK                           | 1,566.85 |
| ATP | 6011 | VAMP (vesicle-associate d membran e protein)-associate d protein A, 33kDa gi 1113046 48,gi 11549 6338,gi 121 957506 | 27,838.90  | 99.80%  | 2  | 4  | 6  | 0.07% | 11.20% | GPFTDV 4.06<br>VTTNLK                               | 1,291.69 |
| ATP | 6011 | VAMP (vesicle-associate d membran e protein)-associate d protein A, 33kDa gi 1113046 48,gi 11549 6338,gi 121 957506 | 27,838.90  | 99.80%  | 2  | 4  | 6  | 0.07% | 11.20% | HEQILVL 4.28<br>DPPTDL<br>K                         | 1,617.89 |

|     |      |                                                                                         |                                                    |           |         |    |    |       |        |                         |                            |          |          |
|-----|------|-----------------------------------------------------------------------------------------|----------------------------------------------------|-----------|---------|----|----|-------|--------|-------------------------|----------------------------|----------|----------|
| ATP | 6011 | RecName gi 1098952 :<br>Full=Tra nsmembrane and coiled-coil domain-containing protein 1 | 21,158.30                                          | 99.90%    | 2       | 2  | 2  | 0.02% | 15.40% | LPFTPLS<br>YIQGLSH<br>R | 4                          | 1,728.94 |          |
| ATP | 6011 | RecName gi 1098952 :<br>Full=Tra nsmembrane and coiled-coil domain-containing protein 1 | 21,158.30                                          | 99.90%    | 2       | 2  | 2  | 0.02% | 15.40% | QAGGFL<br>GPPPPSG<br>K  | 2.8                        | 1,309.69 |          |
| ATP | 6011 | Heat shock 70kDa protein 5 (glucose-regulated protein, 78kDa)                           | gi 1113084<br>68,gi 11549<br>5027,gi 152<br>941210 | 72,383.60 | 100.00% | 22 | 29 | 45    | 0.49%  | 37.90%                  | AKFEEL<br>NMDLFR           | 4.48     | 1,528.75 |
| ATP | 6011 | Heat shock 70kDa protein 5 (glucose-regulated protein, 78kDa)                           | gi 1113084<br>68,gi 11549<br>5027,gi 152<br>941210 | 72,383.60 | 100.00% | 22 | 29 | 45    | 0.49%  | 37.90%                  | DAGTIA<br>GLNVMR           | 3.83     | 1,233.63 |
| ATP | 6011 | Heat shock 70kDa protein 5 (glucose-regulated protein, 78kDa)                           | gi 1113084<br>68,gi 11549<br>5027,gi 152<br>941210 | 72,383.60 | 100.00% | 22 | 29 | 45    | 0.49%  | 37.90%                  | DNHLLG<br>TFDLTGI<br>PPAPR | 2.7      | 1,934.01 |
| ATP | 6011 | Heat shock 70kDa protein 5 (glucose-regulated protein, 78kDa)                           | gi 1113084<br>68,gi 11549<br>5027,gi 152<br>941210 | 72,383.60 | 100.00% | 22 | 29 | 45    | 0.49%  | 37.90%                  | ELEEIVQ<br>PIISK           | 4.06     | 1,397.79 |
| ATP | 6011 | Heat shock 70kDa protein 5 (glucose-regulated protein, 78kDa)                           | gi 1113084<br>68,gi 11549<br>5027,gi 152<br>941210 | 72,383.60 | 100.00% | 22 | 29 | 45    | 0.49%  | 37.90%                  | FEELNM<br>DLFR             | 3.3      | 1,329.61 |
| ATP | 6011 | Heat shock 70kDa protein 5 (glucose-regulated protein, 78kDa)                           | gi 1113084<br>68,gi 11549<br>5027,gi 152<br>941210 | 72,383.60 | 100.00% | 22 | 29 | 45    | 0.49%  | 37.90%                  | IDTRNEL<br>ESYAYS<br>LK    | 3.43     | 1,801.90 |

|     |      |                                                               |                                           |           |         |    |    |    |       |        |                                 |          |
|-----|------|---------------------------------------------------------------|-------------------------------------------|-----------|---------|----|----|----|-------|--------|---------------------------------|----------|
| ATP | 6011 | Heat shock 70kDa protein 5 (glucose-regulated protein, 78kDa) | gi 1113084.68.gi 11549.5027.gi 152.941210 | 72,383.60 | 100.00% | 22 | 29 | 45 | 0.49% | 37.90% | IEIESFYE 4.27<br>GEDFSE<br>TLTR | 2,164.99 |
| ATP | 6011 | Heat shock 70kDa protein 5 (glucose-regulated protein, 78kDa) | gi 1113084.68.gi 11549.5027.gi 152.941210 | 72,383.60 | 100.00% | 22 | 29 | 45 | 0.49% | 37.90% | IINEPTA 4.5<br>AAIAYG<br>LDK    | 1,659.90 |
| ATP | 6011 | Heat shock 70kDa protein 5 (glucose-regulated protein, 78kDa) | gi 1113084.68.gi 11549.5027.gi 152.941210 | 72,383.60 | 100.00% | 22 | 29 | 45 | 0.49% | 37.90% | IINEPTA 3.18<br>AAIAYG<br>LDKR  | 1,816.00 |
| ATP | 6011 | Heat shock 70kDa protein 5 (glucose-regulated protein, 78kDa) | gi 1113084.68.gi 11549.5027.gi 152.941210 | 72,383.60 | 100.00% | 22 | 29 | 45 | 0.49% | 37.90% | ITPSYVA 3.45<br>FTPEGER         | 1,566.78 |
| ATP | 6011 | Heat shock 70kDa protein 5 (glucose-regulated protein, 78kDa) | gi 1113084.68.gi 11549.5027.gi 152.941210 | 72,383.60 | 100.00% | 22 | 29 | 45 | 0.49% | 37.90% | KKELEEI 3.93<br>VQPIISK         | 1,653.98 |
| ATP | 6011 | Heat shock 70kDa protein 5 (glucose-regulated protein, 78kDa) | gi 1113084.68.gi 11549.5027.gi 152.941210 | 72,383.60 | 100.00% | 22 | 29 | 45 | 0.49% | 37.90% | MKETAE 3.66<br>AYLGKK           | 1,384.71 |
| ATP | 6011 | Heat shock 70kDa protein 5 (glucose-regulated protein, 78kDa) | gi 1113084.68.gi 11549.5027.gi 152.941210 | 72,383.60 | 100.00% | 22 | 29 | 45 | 0.49% | 37.90% | MVNDAE 3.25<br>KFAEED<br>KK     | 1,669.77 |
| ATP | 6011 | Heat shock 70kDa protein 5 (glucose-regulated protein, 78kDa) | gi 1113084.68.gi 11549.5027.gi 152.941210 | 72,383.60 | 100.00% | 22 | 29 | 45 | 0.49% | 37.90% | NELESY 2.94<br>AYSLK            | 1,316.64 |

|     |      |                                                               |                                           |           |         |    |    |    |       |        |                                     |      |          |
|-----|------|---------------------------------------------------------------|-------------------------------------------|-----------|---------|----|----|----|-------|--------|-------------------------------------|------|----------|
| ATP | 6011 | Heat shock 70kDa protein 5 (glucose-regulated protein, 78kDa) | gi 1113084.68.gi 11549.5027.gi 152.941210 | 72,383.60 | 100.00% | 22 | 29 | 45 | 0.49% | 37.90% | NQLTSN<br>PENTVF<br>DAK             | 4.76 | 1,677.81 |
| ATP | 6011 | Heat shock 70kDa protein 5 (glucose-regulated protein, 78kDa) | gi 1113084.68.gi 11549.5027.gi 152.941210 | 72,383.60 | 100.00% | 22 | 29 | 45 | 0.49% | 37.90% | NQLTSN<br>PENTVF<br>DAKR            | 4.17 | 1,833.91 |
| ATP | 6011 | Heat shock 70kDa protein 5 (glucose-regulated protein, 78kDa) | gi 1113084.68.gi 11549.5027.gi 152.941210 | 72,383.60 | 100.00% | 22 | 29 | 45 | 0.49% | 37.90% | SDIDEIV<br>LVGGST<br>R              | 2.84 | 1,460.76 |
| ATP | 6011 | Heat shock 70kDa protein 5 (glucose-regulated protein, 78kDa) | gi 1113084.68.gi 11549.5027.gi 152.941210 | 72,383.60 | 100.00% | 22 | 29 | 45 | 0.49% | 37.90% | SQIFSTA<br>SDNQPT<br>VTIK           | 3.82 | 1,836.93 |
| ATP | 6011 | Heat shock 70kDa protein 5 (glucose-regulated protein, 78kDa) | gi 1113084.68.gi 11549.5027.gi 152.941210 | 72,383.60 | 100.00% | 22 | 29 | 45 | 0.49% | 37.90% | TFAPEEI<br>SAMVLT<br>K              | 3.24 | 1,552.79 |
| ATP | 6011 | Heat shock 70kDa protein 5 (glucose-regulated protein, 78kDa) | gi 1113084.68.gi 11549.5027.gi 152.941210 | 72,383.60 | 100.00% | 22 | 29 | 45 | 0.49% | 37.90% | TKPYIQV<br>DVGGGQ<br>TK             | 4.26 | 1,590.85 |
| ATP | 6011 | Heat shock 70kDa protein 5 (glucose-regulated protein, 78kDa) | gi 1113084.68.gi 11549.5027.gi 152.941210 | 72,383.60 | 100.00% | 22 | 29 | 45 | 0.49% | 37.90% | VLESDS<br>LKKSDID<br>EIVLVG<br>GSTR | 5.92 | 2,488.31 |
| ATP | 6011 | Heat shock 70kDa protein 5 (glucose-regulated protein, 78kDa) | gi 1113084.68.gi 11549.5027.gi 152.941210 | 72,383.60 | 100.00% | 22 | 29 | 45 | 0.49% | 37.90% | VTHAVV<br>TVPAYF<br>NDAQR           | 4.03 | 1,887.97 |

|     |      |                             |                                                                                                                                          |           |         |   |   |    |       |        |                                             |      |          |
|-----|------|-----------------------------|------------------------------------------------------------------------------------------------------------------------------------------|-----------|---------|---|---|----|-------|--------|---------------------------------------------|------|----------|
| ATP | 6011 | Junction<br>plakoglob<br>in | gi 1096581<br>66,gi 15739<br>1363,gi 158<br>065994,gi 2<br>0336613,gi <br>211637709,<br>gi 2181030<br>15,gi 51316<br>492,gi 5159<br>1897 | 81,804.10 | 100.00% | 8 | 9 | 10 | 0.11% | 18.40% | ALMGSP<br>QLVAAV<br>VR                      | 3.55 | 1,427.80 |
| ATP | 6011 | Junction<br>plakoglob<br>in | gi 1096581<br>66,gi 15739<br>1363,gi 158<br>065994,gi 2<br>0336613,gi <br>211637709,<br>gi 2181030<br>15,gi 51316<br>492,gi 5159<br>1897 | 81,804.10 | 100.00% | 8 | 9 | 10 | 0.11% | 18.40% | LLNDED<br>PVVVTK                            | 2.87 | 1,341.73 |
| ATP | 6011 | Junction<br>plakoglob<br>in | gi 1096581<br>66,gi 15739<br>1363,gi 158<br>065994,gi 2<br>0336613,gi <br>211637709,<br>gi 2181030<br>15,gi 51316<br>492,gi 5159<br>1897 | 81,804.10 | 100.00% | 8 | 9 | 10 | 0.11% | 18.40% | LNTIPLF<br>VQLLYS<br>SVENIQR                | 4.37 | 2,347.30 |
| ATP | 6011 | Junction<br>plakoglob<br>in | gi 1096581<br>66,gi 15739<br>1363,gi 158<br>065994,gi 2<br>0336613,gi <br>211637709,<br>gi 2181030<br>15,gi 51316<br>492,gi 5159<br>1897 | 81,804.10 | 100.00% | 8 | 9 | 10 | 0.11% | 18.40% | LNYGIPA<br>IVK                              | 2.47 | 1,087.65 |
| ATP | 6011 | Junction<br>plakoglob<br>in | gi 1096581<br>66,gi 15739<br>1363,gi 158<br>065994,gi 2<br>0336613,gi <br>211637709,<br>gi 2181030<br>15,gi 51316<br>492,gi 5159<br>1897 | 81,804.10 | 100.00% | 8 | 9 | 10 | 0.11% | 18.40% | MLSSPV<br>ESVLFY<br>AITLHN<br>LLLYQE<br>GAK | 3.85 | 3,153.65 |
| ATP | 6011 | Junction<br>plakoglob<br>in | gi 1096581<br>66,gi 15739<br>1363,gi 158<br>065994,gi 2<br>0336613,gi <br>211637709,<br>gi 2181030<br>15,gi 51316<br>492,gi 5159<br>1897 | 81,804.10 | 100.00% | 8 | 9 | 10 | 0.11% | 18.40% | NLSDVA<br>TKQEGL<br>ESVLK                   | 2.87 | 1,830.98 |

|     |      |                                                         |                                                                                                                                          |           |         |   |   |    |       |        |                                                                 |      |          |
|-----|------|---------------------------------------------------------|------------------------------------------------------------------------------------------------------------------------------------------|-----------|---------|---|---|----|-------|--------|-----------------------------------------------------------------|------|----------|
| ATP | 6011 | Junction<br>plakoglob<br>in                             | gi 1096581<br>66,gi 15739<br>1363,gi 158<br>065994,gi 2<br>0336613,gi <br>211637709,<br>gi 2181030<br>15,gi 51316<br>492,gi 5159<br>1897 | 81,804.10 | 100.00% | 8 | 9 | 10 | 0.11% | 18.40% | SAIVHLI<br>NYQDDA<br>ELATR                                      | 4.31 | 2,029.04 |
| ATP | 6011 | Junction<br>plakoglob<br>in                             | gi 1096581<br>66,gi 15739<br>1363,gi 158<br>065994,gi 2<br>0336613,gi <br>211637709,<br>gi 2181030<br>15,gi 51316<br>492,gi 5159<br>1897 | 81,804.10 | 100.00% | 8 | 9 | 10 | 0.11% | 18.40% | TLVTQN<br>SGVEALI<br>HAILR                                      | 2.87 | 1,935.10 |
| ATP | 6011 | tubulin,<br>beta 6                                      | gi 1140521<br>48,gi 87578<br>360                                                                                                         | 49,882.10 | 99.80%  | 2 | 2 | 2  | 0.02% | 23.80% | AALVDL<br>EPGTMD<br>SVR                                         | 3.83 | 1,589.78 |
| ATP | 6011 | tubulin,<br>beta 6                                      | gi 1140521<br>48,gi 87578<br>360                                                                                                         | 49,882.10 | 99.80%  | 2 | 2 | 2  | 0.02% | 23.80% | GHYTEG<br>AELVDS<br>VLDVVR                                      | 3.5  | 1,958.98 |
| ATP | 6011 | tubulin,<br>beta 6                                      | gi 1140521<br>48,gi 87578<br>360                                                                                                         | 49,882.10 | 99.80%  | 2 | 2 | 2  | 0.02% | 23.80% | GHYTEG<br>AELVDS<br>VLDVVR                                      | 3.56 | 2,087.08 |
| ATP | 6011 | tubulin,<br>beta 6                                      | gi 1140521<br>48,gi 87578<br>360                                                                                                         | 49,882.10 | 99.80%  | 2 | 2 | 2  | 0.02% | 23.80% | K<br>LAVNMV<br>PFPR                                             | 3.53 | 1,159.63 |
| ATP | 6011 | tubulin,<br>beta 6                                      | gi 1140521<br>48,gi 87578<br>360                                                                                                         | 49,882.10 | 99.80%  | 2 | 2 | 2  | 0.02% | 23.80% | LHFFMP<br>GFAPLT<br>AR                                          | 3.35 | 1,620.84 |
| ATP | 6011 | tubulin,<br>beta 6                                      | gi 1140521<br>48,gi 87578<br>360                                                                                                         | 49,882.10 | 99.80%  | 2 | 2 | 2  | 0.02% | 23.80% | VSDTVV<br>EPYNAT<br>LSVHQL<br>VENTDE<br>TYCIDNE<br>ALYDICF<br>R | 4.25 | 4,479.06 |
| ATP | 6011 | tubulin,<br>beta 6                                      | gi 1140521<br>48,gi 87578<br>360                                                                                                         | 49,882.10 | 99.80%  | 2 | 2 | 2  | 0.02% | 23.80% | YLTVAA<br>VFR                                                   | 2.56 | 1,039.59 |
| ATP | 6011 | RecName<br>:<br>Full=60S<br>ribosomal<br>protein<br>L11 | gi 1088609<br>25,gi 11549<br>7634,gi 742<br>68362                                                                                        | 20,235.20 | 99.80%  | 2 | 2 | 2  | 0.02% | 12.90% | VLEQLT<br>GQTPVF<br>SK                                          | 4.33 | 1,546.85 |
| ATP | 6011 | RecName<br>:<br>Full=60S<br>ribosomal<br>protein<br>L11 | gi 1088609<br>25,gi 11549<br>7634,gi 742<br>68362                                                                                        | 20,235.20 | 99.80%  | 2 | 2 | 2  | 0.02% | 12.90% | YDGILP<br>GK                                                    | 2.54 | 975.5512 |
| ATP | 6011 | syntaxin<br>7                                           | gi 1181508<br>40,gi 12214<br>0829,gi 735<br>86654                                                                                        | 29,638.60 | 99.80%  | 2 | 2 | 2  | 0.02% | 10.70% | EFGSLPT<br>TPSDQR                                               | 2.33 | 1,434.69 |
| ATP | 6011 | syntaxin<br>7                                           | gi 1181508<br>40,gi 12214<br>0829,gi 735<br>86654                                                                                        | 29,638.60 | 99.80%  | 2 | 2 | 2  | 0.02% | 10.70% | TLNQLG<br>TPQDSPE<br>LR                                         | 4.05 | 1,668.86 |

|     |      |                                              |                                                                   |           |         |   |    |    |       |        |                                                  |      |          |
|-----|------|----------------------------------------------|-------------------------------------------------------------------|-----------|---------|---|----|----|-------|--------|--------------------------------------------------|------|----------|
| ATP | 6011 | SEC11<br>homolog<br>A (S.<br>cerevisiae<br>) | gi 1515546<br>19,gi 27806<br>149,gi 5403<br>9632,gi 697<br>9934   | 20,607.80 | 100.00% | 4 | 5  | 8  | 0.09% | 19.60% | GDLLFL<br>TNR                                    | 2.97 | 1,048.58 |
| ATP | 6011 | SEC11<br>homolog<br>A (S.<br>cerevisiae<br>) | gi 1515546<br>19,gi 27806<br>149,gi 5403<br>9632,gi 697<br>9934   | 20,607.80 | 100.00% | 4 | 5  | 8  | 0.09% | 19.60% | GDLLFL<br>TNRVED<br>PIR                          | 3.76 | 1,757.95 |
| ATP | 6011 | SEC11<br>homolog<br>A (S.<br>cerevisiae<br>) | gi 1515546<br>19,gi 27806<br>149,gi 5403<br>9632,gi 697<br>9934   | 20,607.80 | 100.00% | 4 | 5  | 8  | 0.09% | 19.60% | MLSLDF<br>LDDVRR                                 | 2.24 | 1,495.76 |
| ATP | 6011 | SEC11<br>homolog<br>A (S.<br>cerevisiae<br>) | gi 1515546<br>19,gi 27806<br>149,gi 5403<br>9632,gi 697<br>9934   | 20,607.80 | 100.00% | 4 | 5  | 8  | 0.09% | 19.60% | VGEIVVF<br>R                                     | 2.88 | 918.5407 |
| ATP | 6011 | PREDIC<br>TED:<br>brain<br>protein<br>44     | gi 1198890<br>10,gi 19466<br>5199                                 | 14,264.40 | 99.80%  | 2 | 4  | 6  | 0.07% | 18.90% | LRPLYN<br>HPAGPR                                 | 3.3  | 1,390.77 |
| ATP | 6011 | PREDIC<br>TED:<br>brain<br>protein<br>44     | gi 1198890<br>10,gi 19466<br>5199                                 | 14,264.40 | 99.80%  | 2 | 4  | 6  | 0.07% | 18.90% | VLDKVE<br>LLLPEK                                 | 3.59 | 1,395.85 |
| ATP | 6011 | SLC3A2<br>protein                            | gi 1153049<br>25,gi 16444<br>8600,gi 598<br>57795,gi 74<br>354296 | 63,166.50 | 100.00% | 8 | 10 | 13 | 0.14% | 16.60% | EDFESLL<br>HSAK                                  | 3.29 | 1,275.62 |
| ATP | 6011 | SLC3A2<br>protein                            | gi 1153049<br>25,gi 16444<br>8600,gi 598<br>57795,gi 74<br>354296 | 63,166.50 | 100.00% | 8 | 10 | 13 | 0.14% | 16.60% | FLVVLN<br>FGDVGQ<br>LAR                          | 4.15 | 1,647.92 |
| ATP | 6011 | SLC3A2<br>protein                            | gi 1153049<br>25,gi 16444<br>8600,gi 598<br>57795,gi 74<br>354296 | 63,166.50 | 100.00% | 8 | 10 | 13 | 0.14% | 16.60% | FTGLSKE<br>ELLK                                  | 3.08 | 1,264.71 |
| ATP | 6011 | SLC3A2<br>protein                            | gi 1153049<br>25,gi 16444<br>8600,gi 598<br>57795,gi 74<br>354296 | 63,166.50 | 100.00% | 8 | 10 | 13 | 0.14% | 16.60% | LLIAGTD<br>SSDLQQI<br>LR                         | 4.52 | 1,742.97 |
| ATP | 6011 | SLC3A2<br>protein                            | gi 1153049<br>25,gi 16444<br>8600,gi 598<br>57795,gi 74<br>354296 | 63,166.50 | 100.00% | 8 | 10 | 13 | 0.14% | 16.60% | NQEDDL<br>TETNLE<br>QIDPIFG<br>SK                | 4.78 | 2,406.13 |
| ATP | 6011 | SLC3A2<br>protein                            | gi 1153049<br>25,gi 16444<br>8600,gi 598<br>57795,gi 74<br>354296 | 63,166.50 | 100.00% | 8 | 10 | 13 | 0.14% | 16.60% | NQEDDL<br>TETNLE<br>QIDPIFG<br>SKEDFES<br>LLHSAK | 3.71 | 3,662.73 |
| ATP | 6011 | SLC3A2<br>protein                            | gi 1153049<br>25,gi 16444<br>8600,gi 598<br>57795,gi 74<br>354296 | 63,166.50 | 100.00% | 8 | 10 | 13 | 0.14% | 16.60% | VDLLLS<br>TQPGR                                  | 3.45 | 1,198.68 |

|     |      |                                                                                                  |                                                   |           |         |   |    |    |       |        |                            |      |          |
|-----|------|--------------------------------------------------------------------------------------------------|---------------------------------------------------|-----------|---------|---|----|----|-------|--------|----------------------------|------|----------|
| ATP | 6011 | SLC3A2 protein                                                                                   | gi 115304925,gi 164448600,gi 59857795,gi 74354296 | 63,166.50 | 100.00% | 8 | 10 | 13 | 0.14% | 16.60% | VILDLT<br>NYK              | 3.2  | 1,175.67 |
| ATP | 6011 | MHC class I antigen                                                                              | gi 84095083                                       | 40,657.50 | 100.00% | 6 | 8  | 59 | 0.64% | 19.30% | DYIALNE<br>DLR             | 3.77 | 1,221.61 |
| ATP | 6011 | MHC class I antigen                                                                              | gi 84095083                                       | 40,657.50 | 100.00% | 6 | 8  | 59 | 0.64% | 19.30% | FIAVGY<br>VDDTQF<br>VR     | 4.62 | 1,629.83 |
| ATP | 6011 | MHC class I antigen                                                                              | gi 84095083                                       | 40,657.50 | 100.00% | 6 | 8  | 59 | 0.64% | 19.30% | VQHEGL<br>QEPLTLR          | 4.18 | 1,519.82 |
| ATP | 6011 | MHC class I antigen                                                                              | gi 84095083                                       | 40,657.50 | 100.00% | 6 | 8  | 59 | 0.64% | 19.30% | WAALVV<br>PSGEEQ<br>R      | 3.12 | 1,441.74 |
| ATP | 6011 | MHC class I antigen                                                                              | gi 84095083                                       | 40,657.50 | 100.00% | 6 | 8  | 59 | 0.64% | 19.30% | YFYTAV<br>SR               | 2.48 | 1,006.50 |
| ATP | 6011 | MHC class I antigen                                                                              | gi 84095083                                       | 40,657.50 | 100.00% | 6 | 8  | 59 | 0.64% | 19.30% | YLENGK<br>DTLLR            | 3.32 | 1,321.71 |
| ATP | 6011 | DDR GK domain containin g 1                                                                      | gi 115496153,gi 94534940                          | 35,649.00 | 99.80%  | 2 | 2  | 2  | 0.02% | 9.58%  | FIYTPPEE<br>LAAVAN<br>FIR  | 5.32 | 1,967.06 |
| ATP | 6011 | DDR GK domain containin g 1                                                                      | gi 115496153,gi 94534940                          | 35,649.00 | 99.80%  | 2 | 2  | 2  | 0.02% | 9.58%  | LRLEEE<br>QKEEEE<br>R      | 2.6  | 1,716.84 |
| ATP | 6011 | eukaryotic translation elongation factor 2                                                       | gi 115497900,gi 74353984,gi 88909609              | 95,352.20 | 99.80%  | 2 | 2  | 2  | 0.02% | 3.38%  | ALLELQ<br>LEPEELY<br>QTFQR | 4.59 | 2,220.15 |
| ATP | 6011 | eukaryotic translation elongation factor 2                                                       | gi 115497900,gi 74353984,gi 88909609              | 95,352.20 | 99.80%  | 2 | 2  | 2  | 0.02% | 3.38%  | VFSGLV<br>STGLK            | 2.62 | 1,107.64 |
| ATP | 6011 | RecName: Full=Synaptic glycoprotein SC2; AltName: Full=Trans-2,3-enoyl-CoA reductase; Short=TE R | gi 122140918,gi 73586600,gi 77736441              | 36,056.10 | 99.80%  | 2 | 2  | 2  | 0.02% | 7.14%  | LPVGGT<br>ATLYFR           | 3.36 | 1,338.74 |



|     |      |                                                                                                                                                   |                                                                                  |           |         |   |   |   |       |        |                                      |      |          |
|-----|------|---------------------------------------------------------------------------------------------------------------------------------------------------|----------------------------------------------------------------------------------|-----------|---------|---|---|---|-------|--------|--------------------------------------|------|----------|
| ATP | 6011 | RecName<br>:<br>Full=Syn<br>aptic<br>glycoprot<br>ein SC2;<br>AltName:<br>Full=Tra<br>ns-2,3-<br>enoyl-<br>CoA<br>reductase<br>;<br>Short=TE<br>R | gi 1221409<br>18,gi 73586<br>600,gi 7773<br>6441                                 | 36,056.10 | 99.80%  | 2 | 2 | 2 | 0.02% | 7.14%  | SLKDED<br>VLQK                       | 2.43 | 1,174.63 |
| ATP | 6011 | RecName<br>:<br>Full=Gal<br>ectin-9                                                                                                               | gi 1221450<br>68,gi 59858<br>325,gi 6275<br>1460,gi 757<br>75171,gi 87<br>044899 | 39,329.70 | 99.80%  | 2 | 2 | 3 | 0.03% | 9.30%  | NLPAINN<br>LEVGGD<br>IQLTHV<br>QT    | 5.39 | 2,246.18 |
| ATP | 6011 | RecName<br>:<br>Full=Gal<br>ectin-9                                                                                                               | gi 1221450<br>68,gi 59858<br>325,gi 6275<br>1460,gi 757<br>75171,gi 87<br>044899 | 39,329.70 | 99.80%  | 2 | 2 | 3 | 0.03% | 9.30%  | SGSDIAF<br>HLNPR                     | 2.77 | 1,313.66 |
| ATP | 6011 | PREDIC<br>TED:<br>similar to<br>Calpain-5<br>(nCL-3)<br>(htra-3)<br>isoform 1                                                                     | gi 7663613<br>4                                                                  | 72,988.00 | 99.80%  | 2 | 2 | 2 | 0.02% | 5.16%  | ANADDL<br>QALHTL<br>HLR              | 2.85 | 1,687.89 |
| ATP | 6011 | PREDIC<br>TED:<br>similar to<br>Calpain-5<br>(nCL-3)<br>(htra-3)<br>isoform 1                                                                     | gi 7663613<br>4                                                                  | 72,988.00 | 99.80%  | 2 | 2 | 2 | 0.02% | 5.16%  | VLFEDEP<br>NFPATD<br>DSLYYK          | 3.95 | 2,134.00 |
| ATP | 6011 | RAB5C,<br>member<br>RAS<br>oncogene<br>family                                                                                                     | gi 1096591<br>70,gi 61553<br>191,gi 7505<br>2596,gi 777<br>36431                 | 23,448.70 | 100.00% | 4 | 4 | 5 | 0.05% | 28.20% | AVEFQE<br>AQAYAE<br>DNSLLF<br>METSAC | 3.11 | 2,708.24 |
| ATP | 6011 | RAB5C,<br>member<br>RAS<br>oncogene<br>family                                                                                                     | gi 1096591<br>70,gi 61553<br>191,gi 7505<br>2596,gi 777<br>36431                 | 23,448.70 | 100.00% | 4 | 4 | 5 | 0.05% | 28.20% | GVDLQE<br>NNPASR                     | 3.35 | 1,299.63 |
| ATP | 6011 | RAB5C,<br>member<br>RAS<br>oncogene<br>family                                                                                                     | gi 1096591<br>70,gi 61553<br>191,gi 7505<br>2596,gi 777<br>36431                 | 23,448.70 | 100.00% | 4 | 4 | 5 | 0.05% | 28.20% | LVLLGE<br>SAVGK                      | 3.36 | 1,085.66 |
| ATP | 6011 | RAB5C,<br>member<br>RAS<br>oncogene<br>family                                                                                                     | gi 1096591<br>70,gi 61553<br>191,gi 7505<br>2596,gi 777<br>36431                 | 23,448.70 | 100.00% | 4 | 4 | 5 | 0.05% | 28.20% | QASPNIV<br>IALAGN<br>K               | 2.8  | 1,395.80 |

|     |      |                                                                                            |                                   |           |         |   |   |    |       |        |                             |      |          |
|-----|------|--------------------------------------------------------------------------------------------|-----------------------------------|-----------|---------|---|---|----|-------|--------|-----------------------------|------|----------|
| ATP | 6011 | PREDIC<br>TED:<br>similar to<br>RAB6A,<br>member<br>RAS<br>oncogene<br>family<br>isoform 2 | gi 1199075<br>95.gi 11990<br>7597 | 23,545.30 | 100.00% | 6 | 7 | 16 | 0.17% | 32.70% | ELNVMF<br>IETSAK            | 3.68 | 1,397.70 |
| ATP | 6011 | PREDIC<br>TED:<br>similar to<br>RAB6A,<br>member<br>RAS<br>oncogene<br>family<br>isoform 2 | gi 1199075<br>95.gi 11990<br>7597 | 23,545.30 | 100.00% | 6 | 7 | 16 | 0.17% | 32.70% | GSDVIIM<br>LVGNK            | 3.33 | 1,261.68 |
| ATP | 6011 | PREDIC<br>TED:<br>similar to<br>RAB6A,<br>member<br>RAS<br>oncogene<br>family<br>isoform 2 | gi 1199075<br>95.gi 11990<br>7597 | 23,545.30 | 100.00% | 6 | 7 | 16 | 0.17% | 32.70% | GSDVIIM<br>LVGNKT<br>DLADKR | 2.55 | 2,061.10 |
| ATP | 6011 | PREDIC<br>TED:<br>similar to<br>RAB6A,<br>member<br>RAS<br>oncogene<br>family<br>isoform 2 | gi 1199075<br>95.gi 11990<br>7597 | 23,545.30 | 100.00% | 6 | 7 | 16 | 0.17% | 32.70% | LQLWDT<br>AGQER             | 2.72 | 1,316.66 |
| ATP | 6011 | PREDIC<br>TED:<br>similar to<br>RAB6A,<br>member<br>RAS<br>oncogene<br>family<br>isoform 2 | gi 1199075<br>95.gi 11990<br>7597 | 23,545.30 | 100.00% | 6 | 7 | 16 | 0.17% | 32.70% | LVFLGE<br>QSVGK             | 2.74 | 1,176.66 |
| ATP | 6011 | PREDIC<br>TED:<br>similar to<br>RAB6A,<br>member<br>RAS<br>oncogene<br>family<br>isoform 2 | gi 1199075<br>95.gi 11990<br>7597 | 23,545.30 | 100.00% | 6 | 7 | 16 | 0.17% | 32.70% | RVAAAL<br>PGMEST<br>QDR     | 2.93 | 1,617.80 |
| ATP | 6011 | PREDIC<br>TED:<br>similar to<br>RAB6A,<br>member<br>RAS<br>oncogene<br>family<br>isoform 2 | gi 1199075<br>95.gi 11990<br>7597 | 23,545.30 | 100.00% | 6 | 7 | 16 | 0.17% | 32.70% | VAAALP<br>GMESTQ<br>DR      | 2.68 | 1,461.70 |

|     |      |                                                                                                                                                                                                                                     |           |         |   |   |   |       |        |                                        |          |
|-----|------|-------------------------------------------------------------------------------------------------------------------------------------------------------------------------------------------------------------------------------------|-----------|---------|---|---|---|-------|--------|----------------------------------------|----------|
| ATP | 6011 | Chain F, gi 1492415<br>Cadmium 41,gi 14924<br>Ion 1554,gi 149<br>Binding 241571,gi 1<br>Structure 49241584,g<br>Of i 14924160<br>Bovine 1,gi 149241<br>Heart 614<br>Cytochrome C<br>Oxidase<br>In The<br>Fully<br>Oxidized<br>State | 10,651.90 | 100.00% | 3 | 3 | 3 | 0.03% | 30.60% | ASGGGV 3.78<br>PTDEEQ<br>ATGLER        | 1,773.83 |
| ATP | 6011 | Chain F, gi 1492415<br>Cadmium 41,gi 14924<br>Ion 1554,gi 149<br>Binding 241571,gi 1<br>Structure 49241584,g<br>Of i 14924160<br>Bovine 1,gi 149241<br>Heart 614<br>Cytochrome C<br>Oxidase<br>In The<br>Fully<br>Oxidized<br>State | 10,651.90 | 100.00% | 3 | 3 | 3 | 0.03% | 30.60% | GQDPYN 3.16<br>ILAPK                   | 1,215.64 |
| ATP | 6011 | Chain F, gi 1492415<br>Cadmium 41,gi 14924<br>Ion 1554,gi 149<br>Binding 241571,gi 1<br>Structure 49241584,g<br>Of i 14924160<br>Bovine 1,gi 149241<br>Heart 614<br>Cytochrome C<br>Oxidase<br>In The<br>Fully<br>Oxidized<br>State | 10,651.90 | 100.00% | 3 | 3 | 3 | 0.03% | 30.60% | KGQDPY 2.81<br>NILAPK                  | 1,343.73 |
| ATP | 6011 | PREDICTED: 88<br>similar to<br>Actin,<br>cytoplasmic 2<br>(Beta-actin-2)                                                                                                                                                            | 41,854.80 | 99.80%  | 2 | 3 | 4 | 0.04% | 27.10% | DLTDYL 2.34<br>MK                      | 1,014.48 |
| ATP | 6011 | PREDICTED: 88<br>similar to<br>Actin,<br>cytoplasmic 2<br>(Beta-actin-2)                                                                                                                                                            | 41,854.80 | 99.80%  | 2 | 3 | 4 | 0.04% | 27.10% | GYSFTT 3.61<br>TAER                    | 1,132.53 |
| ATP | 6011 | PREDICTED: 88<br>similar to<br>Actin,<br>cytoplasmic 2<br>(Beta-actin-2)                                                                                                                                                            | 41,854.80 | 99.80%  | 2 | 3 | 4 | 0.04% | 27.10% | HQGVM 2.8<br>VGMGQ<br>KDCYVG<br>DEAQSK | 2,383.05 |

|     |      |                                                                                             |                                                 |           |         |   |   |   |       |        |                                                |      |          |
|-----|------|---------------------------------------------------------------------------------------------|-------------------------------------------------|-----------|---------|---|---|---|-------|--------|------------------------------------------------|------|----------|
| ATP | 6011 | PREDICTED:<br>similar to<br>Actin,<br>cytoplasmic 2<br>(Beta-actin-2)                       | gi 194676388                                    | 41,854.80 | 99.80%  | 2 | 3 | 4 | 0.04% | 27.10% | HQGVV<br>VGMGQ<br>KDCYVG<br>DEAQS<br>KR        | 2.79 | 2,539.15 |
| ATP | 6011 | PREDICTED:<br>similar to<br>Actin,<br>cytoplasmic 2<br>(Beta-actin-2)                       | gi 194676388                                    | 41,854.80 | 99.80%  | 2 | 3 | 4 | 0.04% | 27.10% | IKIAPPE<br>R                                   | 2.45 | 1,036.65 |
| ATP | 6011 | PREDICTED:<br>similar to<br>Actin,<br>cytoplasmic 2<br>(Beta-actin-2)                       | gi 194676388                                    | 41,854.80 | 99.80%  | 2 | 3 | 4 | 0.04% | 27.10% | LDLAGR<br>DLTDYL<br>MK                         | 3    | 1,639.84 |
| ATP | 6011 | PREDICTED:<br>similar to<br>Actin,<br>cytoplasmic 2<br>(Beta-actin-2)                       | gi 194676388                                    | 41,854.80 | 99.80%  | 2 | 3 | 4 | 0.04% | 27.10% | SYELPD<br>GQVITIG<br>NER                       | 4.26 | 1,790.89 |
| ATP | 6011 | PREDICTED:<br>similar to<br>Actin,<br>cytoplasmic 2<br>(Beta-actin-2)                       | gi 194676388                                    | 41,854.80 | 99.80%  | 2 | 3 | 4 | 0.04% | 27.10% | TTGIVM<br>DSGDGV<br>THTVPIY<br>EGYALP<br>HAILR | 5.42 | 3,183.61 |
| ATP | 6011 | tyrosine 3-monooxygenase/tryptophan 5-monooxygenase activation protein, epsilon polypeptide | gi 27806197,gi 3676399,gi 7115379,gi 735865-683 | 29,157.00 | 100.00% | 2 | 3 | 6 | 0.07% | 15.70% | AAFDDA<br>IAELDTL<br>SEESYK<br>DSTLIM<br>QLLR  | 4.79 | 3,274.60 |
| ATP | 6011 | tyrosine 3-monooxygenase/tryptophan 5-monooxygenase activation protein, epsilon polypeptide | gi 27806197,gi 3676399,gi 7115379,gi 735865-683 | 29,157.00 | 100.00% | 2 | 3 | 6 | 0.07% | 15.70% | EAAENS<br>LVAYK                                | 2.22 | 1,194.60 |

|     |      |                                                                                 |                                                                 |            |         |    |    |    |       |        |                                   |      |          |
|-----|------|---------------------------------------------------------------------------------|-----------------------------------------------------------------|------------|---------|----|----|----|-------|--------|-----------------------------------|------|----------|
| ATP | 6011 | RecName<br>:<br>Full=Coil<br>ed-coil<br>domain-<br>containin<br>g protein<br>56 | gi 1089359<br>63,gi 74268<br>043,gi 7773<br>6311                | 11,689.70  | 99.80%  | 2  | 2  | 2  | 0.02% | 20.80% | EKLTPA<br>QLQFMR                  | 2.73 | 1,477.78 |
| ATP | 6011 | RecName<br>:<br>Full=Coil<br>ed-coil<br>domain-<br>containin<br>g protein<br>56 | gi 1089359<br>63,gi 74268<br>043,gi 7773<br>6311                | 11,689.70  | 99.80%  | 2  | 2  | 2  | 0.02% | 20.80% | FLDELE<br>DEAK                    | 3.13 | 1,208.57 |
| ATP | 6011 | proteaso<br>me<br>activator<br>28 alpha<br>subunit                              | gi 6313965<br>0,gi 739218<br>36,gi 86821<br>522,gi 9168<br>0535 | 28,675.80  | 99.80%  | 2  | 2  | 2  | 0.02% | 10.40% | APLDIPV<br>PDPVKE<br>K            | 2.44 | 1,517.86 |
| ATP | 6011 | proteaso<br>me<br>activator<br>28 alpha<br>subunit                              | gi 6313965<br>0,gi 739218<br>36,gi 86821<br>522,gi 9168<br>0535 | 28,675.80  | 99.80%  | 2  | 2  | 2  | 0.02% | 10.40% | QLVHEL<br>DEAEYR                  | 2.38 | 1,501.73 |
| ATP | 6011 | Hexokina<br>se 1                                                                | gi 1544261<br>22,gi 33332<br>343,gi 6059<br>2784                | 102,191.60 | 100.00% | 11 | 13 | 17 | 0.19% | 13.50% | GAAMVT<br>AVAYR                   | 3.27 | 1,125.57 |
| ATP | 6011 | Hexokina<br>se 1                                                                | gi 1544261<br>22,gi 33332<br>343,gi 6059<br>2784                | 102,191.60 | 100.00% | 11 | 13 | 17 | 0.19% | 13.50% | GDFIALD<br>LGGSSFR                | 3.29 | 1,454.73 |
| ATP | 6011 | Hexokina<br>se 1                                                                | gi 1544261<br>22,gi 33332<br>343,gi 6059<br>2784                | 102,191.60 | 100.00% | 11 | 13 | 17 | 0.19% | 13.50% | GKFNTS<br>DVSAIEK                 | 3.99 | 1,395.71 |
| ATP | 6011 | Hexokina<br>se 1                                                                | gi 1544261<br>22,gi 33332<br>343,gi 6059<br>2784                | 102,191.60 | 100.00% | 11 | 13 | 17 | 0.19% | 13.50% | LSDETL<br>DIMNR                   | 4.01 | 1,435.71 |
| ATP | 6011 | Hexokina<br>se 1                                                                | gi 1544261<br>22,gi 33332<br>343,gi 6059<br>2784                | 102,191.60 | 100.00% | 11 | 13 | 17 | 0.19% | 13.50% | LVDEFSL<br>NSGK                   | 3.01 | 1,208.62 |
| ATP | 6011 | Hexokina<br>se 1                                                                | gi 1544261<br>22,gi 33332<br>343,gi 6059<br>2784                | 102,191.60 | 100.00% | 11 | 13 | 17 | 0.19% | 13.50% | QIEETLA<br>HFSLTK                 | 3.68 | 1,516.80 |
| ATP | 6011 | Hexokina<br>se 1                                                                | gi 1544261<br>22,gi 33332<br>343,gi 6059<br>2784                | 102,191.60 | 100.00% | 11 | 13 | 17 | 0.19% | 13.50% | SANLVA<br>ATLGAIL<br>SR           | 4.49 | 1,456.85 |
| ATP | 6011 | Hexokina<br>se 1                                                                | gi 1544261<br>22,gi 33332<br>343,gi 6059<br>2784                | 102,191.60 | 100.00% | 11 | 13 | 17 | 0.19% | 13.50% | SIPDGSE<br>KGFIAL<br>DLGGSS<br>FR | 3.47 | 2,268.11 |
| ATP | 6011 | Hexokina<br>se 1                                                                | gi 1544261<br>22,gi 33332<br>343,gi 6059<br>2784                | 102,191.60 | 100.00% | 11 | 13 | 17 | 0.19% | 13.50% | TTVGVD<br>GSLYK                   | 2.73 | 1,139.59 |
| ATP | 6011 | Hexokina<br>se 1                                                                | gi 1544261<br>22,gi 33332<br>343,gi 6059<br>2784                | 102,191.60 | 100.00% | 11 | 13 | 17 | 0.19% | 13.50% | YLSQIES<br>DR                     | 2.33 | 1,110.54 |
| ATP | 6011 | Hexokina<br>se 1                                                                | gi 1544261<br>22,gi 33332<br>343,gi 6059<br>2784                | 102,191.60 | 100.00% | 11 | 13 | 17 | 0.19% | 13.50% | YLSQIES<br>DRLALL<br>QVR          | 2.36 | 1,904.06 |

|     |      |                                                                                                           |           |         |   |   |   |       |       |                                   |          |
|-----|------|-----------------------------------------------------------------------------------------------------------|-----------|---------|---|---|---|-------|-------|-----------------------------------|----------|
| ATP | 6011 | RecName gi 1108327 :<br>87.gi 77567<br>Full=Cad 834.gi 7836<br>herin-13; 9244<br>Flags:<br>Precursor      | 78,179.40 | 100.00% | 3 | 4 | 5 | 0.05% | 5.19% | DIQGS LQ 3.24<br>DIFK             | 1,263.66 |
| ATP | 6011 | RecName gi 1108327 :<br>87.gi 77567<br>Full=Cad 834.gi 7836<br>herin-13; 9244<br>Flags:<br>Precursor      | 78,179.40 | 100.00% | 3 | 4 | 5 | 0.05% | 5.19% | INENTGS 3.43<br>VSVTR             | 1,276.65 |
| ATP | 6011 | RecName gi 1108327 :<br>87.gi 77567<br>Full=Cad 834.gi 7836<br>herin-13; 9244<br>Flags:<br>Precursor      | 78,179.40 | 100.00% | 3 | 4 | 5 | 0.05% | 5.19% | SIVVSPIL 3.85<br>IPENQR           | 1,564.91 |
| ATP | 6011 | EGF, gi 1153051 :<br>latrophilin and seven<br>transmembrane domain<br>containing 1<br>44.gi 11600<br>4035 | 77,458.50 | 100.00% | 3 | 3 | 5 | 0.05% | 4.35% | HIEEPVA 2.38<br>LLR               | 1,176.67 |
| ATP | 6011 | EGF, gi 1153051 :<br>latrophilin and seven<br>transmembrane domain<br>containing 1<br>44.gi 11600<br>4035 | 77,458.50 | 100.00% | 3 | 3 | 5 | 0.05% | 4.35% | LIHTAEQ 3.76<br>ATLR              | 1,252.70 |
| ATP | 6011 | EGF, gi 1153051 :<br>latrophilin and seven<br>transmembrane domain<br>containing 1<br>44.gi 11600<br>4035 | 77,458.50 | 100.00% | 3 | 3 | 5 | 0.05% | 4.35% | VTFTLS 2.69<br>HIK                | 1,045.60 |
| ATP | 6011 | PREDICTED: gi 7665865 :<br>7<br>similar to program<br>med cell death 8<br>isoform 2                       | 66,854.50 | 99.80%  | 2 | 2 | 2 | 0.02% | 4.89% | ISGLGLT 3.71<br>PEEK              | 1,143.63 |
| ATP | 6011 | PREDICTED: gi 7665865 :<br>7<br>similar to program<br>med cell death 8<br>isoform 2                       | 66,854.50 | 99.80%  | 2 | 2 | 2 | 0.02% | 4.89% | VLI VSED 2.78<br>PELPYM<br>RPPLSK | 2,199.17 |

|     |      |                                                                                                                                                                                                           |           |         |   |    |    |       |        |                                             |          |
|-----|------|-----------------------------------------------------------------------------------------------------------------------------------------------------------------------------------------------------------|-----------|---------|---|----|----|-------|--------|---------------------------------------------|----------|
| ATP | 6011 | RecName gi 115421.g<br>: i 19467806<br>Full=Cad 8,gi 664894<br>herin-2;<br>AltName:<br>Full=Neu<br>ral<br>cadherin;<br>Short=N-<br>cadherin;<br>AltName:<br>CD_antig<br>en=CD32<br>5; Flags:<br>Precursor | 96,830.40 | 100.00% | 8 | 11 | 13 | 0.14% | 19.80% | FAIQTDP 3.48<br>NSNDGL<br>VTVVKPI<br>DFETNR | 2,890.46 |
| ATP | 6011 | RecName gi 115421.g<br>: i 19467806<br>Full=Cad 8,gi 664894<br>herin-2;<br>AltName:<br>Full=Neu<br>ral<br>cadherin;<br>Short=N-<br>cadherin;<br>AltName:<br>CD_antig<br>en=CD32<br>5; Flags:<br>Precursor | 96,830.40 | 100.00% | 8 | 11 | 13 | 0.14% | 19.80% | FLEAGIY 3.84<br>EVPIITD<br>SGNPPK           | 2,273.21 |
| ATP | 6011 | RecName gi 115421.g<br>: i 19467806<br>Full=Cad 8,gi 664894<br>herin-2;<br>AltName:<br>Full=Neu<br>ral<br>cadherin;<br>Short=N-<br>cadherin;<br>AltName:<br>CD_antig<br>en=CD32<br>5; Flags:<br>Precursor | 96,830.40 | 100.00% | 8 | 11 | 13 | 0.14% | 19.80% | GPPFQEL 2.27<br>VR                          | 1,042.57 |

|     |      |                                                                                                                                                                                                           |           |         |   |    |    |       |        |                                |          |
|-----|------|-----------------------------------------------------------------------------------------------------------------------------------------------------------------------------------------------------------|-----------|---------|---|----|----|-------|--------|--------------------------------|----------|
| ATP | 6011 | RecName gi 115421.g<br>: i 19467806<br>Full=Cad 8,gi 664894<br>herin-2;<br>AltName:<br>Full=Neu<br>ral<br>cadherin;<br>Short=N-<br>cadherin;<br>AltName:<br>CD_antig<br>en=CD32<br>5; Flags:<br>Precursor | 96,830.40 | 100.00% | 8 | 11 | 13 | 0.14% | 19.80% | MYVLTV 3.31<br>AAENQV<br>PLAK  | 1,762.94 |
| ATP | 6011 | RecName gi 115421.g<br>: i 19467806<br>Full=Cad 8,gi 664894<br>herin-2;<br>AltName:<br>Full=Neu<br>ral<br>cadherin;<br>Short=N-<br>cadherin;<br>AltName:<br>CD_antig<br>en=CD32<br>5; Flags:<br>Precursor | 96,830.40 | 100.00% | 8 | 11 | 13 | 0.14% | 19.80% | QLLIDPE 2.03<br>DDVRDN<br>ILK  | 1,896.01 |
| ATP | 6011 | RecName gi 115421.g<br>: i 19467806<br>Full=Cad 8,gi 664894<br>herin-2;<br>AltName:<br>Full=Neu<br>ral<br>cadherin;<br>Short=N-<br>cadherin;<br>AltName:<br>CD_antig<br>en=CD32<br>5; Flags:<br>Precursor | 96,830.40 | 100.00% | 8 | 11 | 13 | 0.14% | 19.80% | SAAPHP 4.6<br>GDIGDFI<br>NEGLK | 1,837.91 |



|     |      |                                                                                                                         |                                                  |           |         |   |    |    |       |        |                                                         |      |          |
|-----|------|-------------------------------------------------------------------------------------------------------------------------|--------------------------------------------------|-----------|---------|---|----|----|-------|--------|---------------------------------------------------------|------|----------|
| ATP | 6011 | RecName : Full=Cadherin-2; AltName: Full=Neural cadherin; Short=N-cadherin; AltName: CD_antigen=CD325; Flags: Precursor | gi 115421.gi 19467806                            | 96,830.40 | 100.00% | 8 | 11 | 13 | 0.14% | 19.80% | YDEEGG<br>GEEDQD<br>YDLSQL<br>QQPDTV<br>EPDAIKP<br>VGIR | 6.43 | 3,905.78 |
| ATP | 6011 | RecName : Full=Cadherin-2; AltName: Full=Neural cadherin; Short=N-cadherin; AltName: CD_antigen=CD325; Flags: Precursor | gi 115421.gi 19467806                            | 96,830.40 | 100.00% | 8 | 11 | 13 | 0.14% | 19.80% | YSVTGP<br>GADQPP<br>TGIFIINP<br>ISGQLSV<br>TKPLDR       | 3.86 | 3,438.83 |
| ATP | 6011 | mitochondrial short-chain enoyl-coenzyme A hydratase 1 precursor                                                        | gi 6155349.7.gi 70778822.gi 73919274.gi 83638650 | 31,226.90 | 99.80%  | 2 | 2  | 2  | 0.02% | 11.70% | AQFGQP<br>EILIGTIP<br>GAGGTQ<br>R                       | 4.91 | 2,111.12 |
| ATP | 6011 | mitochondrial short-chain enoyl-coenzyme A hydratase 1 precursor                                                        | gi 6155349.7.gi 70778822.gi 73919274.gi 83638650 | 31,226.90 | 99.80%  | 2 | 2  | 2  | 0.02% | 11.70% | NSNVGLI<br>QLNRPK                                       | 3.74 | 1,452.83 |
| ATP | 6011 | F1-F0-ATPase                                                                                                            | gi 162701.gi 231615.gi 28603752.gi 74268301      | 8,303.10  | 100.00% | 4 | 5  | 12 | 0.13% | 56.30% | ELAEAQ<br>EDTILK                                        | 4.28 | 1,359.70 |
| ATP | 6011 | F1-F0-ATPase                                                                                                            | gi 162701.gi 231615.gi 28603752.gi 74268301      | 8,303.10  | 100.00% | 4 | 5  | 12 | 0.13% | 56.30% | IERELAE<br>AQEDTIL<br>K                                 | 3.93 | 1,757.93 |

|     |      |                                                  |                                             |           |         |    |    |    |       |        |                                                                       |          |
|-----|------|--------------------------------------------------|---------------------------------------------|-----------|---------|----|----|----|-------|--------|-----------------------------------------------------------------------|----------|
| ATP | 6011 | F1-F0-ATPase                                     | gi 162701.gi 231615.gi 28603752.gi 74268301 | 8,303.10  | 100.00% | 4  | 5  | 12 | 0.13% | 56.30% | MVPPVQ 2.18<br>VSPLIK                                                 | 1,323.77 |
| ATP | 6011 | F1-F0-ATPase                                     | gi 162701.gi 231615.gi 28603752.gi 74268301 | 8,303.10  | 100.00% | 4  | 5  | 12 | 0.13% | 56.30% | YSALFL 4.17<br>GMAYG<br>AK                                            | 1,407.70 |
| ATP | 6011 | DnaJ (Hsp40) homolog, subfamily 915 C, member 19 | gi 7358709.8.gi 777358.gi 83305             | 12,481.10 | 99.80%  | 2  | 2  | 2  | 0.02% | 27.60% | EAALILG 3.02<br>VSPTAN<br>K                                           | 1,383.78 |
| ATP | 6011 | DnaJ (Hsp40) homolog, subfamily 915 C, member 19 | gi 7358709.8.gi 777358.gi 83305             | 12,481.10 | 99.80%  | 2  | 2  | 2  | 0.02% | 27.60% | IMLLNH 3.58<br>PDKGGS<br>PYIAAK                                       | 1,941.03 |
| ATP | 6011 | P4HB protein                                     | gi 1488784.30.gi 152941196                  | 57,187.70 | 100.00% | 11 | 13 | 15 | 0.16% | 31.60% | FLESGG 4.81<br>QDGAGD<br>DDDLED<br>LEEAEPP<br>DLEEDD<br>DQK           | 3,739.49 |
| ATP | 6011 | P4HB protein                                     | gi 1488784.30.gi 152941196                  | 57,187.70 | 100.00% | 11 | 13 | 15 | 0.16% | 31.60% | FLESGG 6.33<br>QDGAGD<br>DDDLED<br>LEEAEPP<br>DLEEDD<br>DQKAVK<br>DEL | 4,394.84 |
| ATP | 6011 | P4HB protein                                     | gi 1488784.30.gi 152941196                  | 57,187.70 | 100.00% | 11 | 13 | 15 | 0.16% | 31.60% | GNFDEA 3.1<br>LAAHK                                                   | 1,172.57 |
| ATP | 6011 | P4HB protein                                     | gi 1488784.30.gi 152941196                  | 57,187.70 | 100.00% | 11 | 13 | 15 | 0.16% | 31.60% | HNQLPL 4.39<br>VIEFTEQ<br>TAPK                                        | 1,965.04 |
| ATP | 6011 | P4HB protein                                     | gi 1488784.30.gi 152941196                  | 57,187.70 | 100.00% | 11 | 13 | 15 | 0.16% | 31.60% | ILEFFGL 1.99<br>K                                                     | 966.566  |
| ATP | 6011 | P4HB protein                                     | gi 1488784.30.gi 152941196                  | 57,187.70 | 100.00% | 11 | 13 | 15 | 0.16% | 31.60% | ILFIFIDS 1.85<br>DHTDNQ<br>R                                          | 1,833.91 |
| ATP | 6011 | P4HB protein                                     | gi 1488784.30.gi 152941196                  | 57,187.70 | 100.00% | 11 | 13 | 15 | 0.16% | 31.60% | LITLEEE 2.47<br>MTK                                                   | 1,222.62 |
| ATP | 6011 | P4HB protein                                     | gi 1488784.30.gi 152941196                  | 57,187.70 | 100.00% | 11 | 13 | 15 | 0.16% | 31.60% | NFEEVA 3.72<br>FDEKK                                                  | 1,355.65 |
| ATP | 6011 | P4HB protein                                     | gi 1488784.30.gi 152941196                  | 57,187.70 | 100.00% | 11 | 13 | 15 | 0.16% | 31.60% | QFLLA 4.45<br>EAIDDIP<br>FGITSNS<br>DVFSK                             | 2,698.36 |
| ATP | 6011 | P4HB protein                                     | gi 1488784.30.gi 152941196                  | 57,187.70 | 100.00% | 11 | 13 | 15 | 0.16% | 31.60% | YKPESD 3.7<br>ELTAEK                                                  | 1,409.68 |
| ATP | 6011 | P4HB protein                                     | gi 1488784.30.gi 152941196                  | 57,187.70 | 100.00% | 11 | 13 | 15 | 0.16% | 31.60% | YQLDKD 2.92<br>GVVLFK                                                 | 1,424.78 |

|     |      |                                                                             |                                                                  |           |         |   |   |   |       |        |                                      |          |
|-----|------|-----------------------------------------------------------------------------|------------------------------------------------------------------|-----------|---------|---|---|---|-------|--------|--------------------------------------|----------|
| ATP | 6011 | RecName<br>:<br>Full=Ras-<br>related<br>protein<br>Rab-11B                  | gi 1088609<br>22,gi 75773<br>827,gi 7836<br>9332                 | 24,471.00 | 100.00% | 5 | 5 | 9 | 0.10% | 23.40% | GAVGAL 3.98<br>LVYDIA<br>K           | 1,289.75 |
| ATP | 6011 | RecName<br>:<br>Full=Ras-<br>related<br>protein<br>Rab-11B                  | gi 1088609<br>22,gi 75773<br>827,gi 7836<br>9332                 | 24,471.00 | 100.00% | 5 | 5 | 9 | 0.10% | 23.40% | HLTYEN 2.22<br>VER                   | 1,160.57 |
| ATP | 6011 | RecName<br>:<br>Full=Ras-<br>related<br>protein<br>Rab-11B                  | gi 1088609<br>22,gi 75773<br>827,gi 7836<br>9332                 | 24,471.00 | 100.00% | 5 | 5 | 9 | 0.10% | 23.40% | NILTEIY 2.4<br>R                     | 1,021.57 |
| ATP | 6011 | RecName<br>:<br>Full=Ras-<br>related<br>protein<br>Rab-11B                  | gi 1088609<br>22,gi 75773<br>827,gi 7836<br>9332                 | 24,471.00 | 100.00% | 5 | 5 | 9 | 0.10% | 23.40% | STIGVEF 2.78<br>ATR                  | 1,080.57 |
| ATP | 6011 | RecName<br>:<br>Full=Ras-<br>related<br>protein<br>Rab-11B                  | gi 1088609<br>22,gi 75773<br>827,gi 7836<br>9332                 | 24,471.00 | 100.00% | 5 | 5 | 9 | 0.10% | 23.40% | VVLIGDS 2.82<br>GVGK                 | 1,043.61 |
| ATP | 6011 | SEPT11<br>protein                                                           | gi 1260108<br>11,gi 12672<br>3403,gi 162<br>416046               | 48,974.60 | 100.00% | 3 | 3 | 3 | 0.03% | 9.88%  | AAAQLL 5.26<br>QSQAQQ<br>SGAQQT<br>K | 1,957.01 |
| ATP | 6011 | SEPT11<br>protein                                                           | gi 1260108<br>11,gi 12672<br>3403,gi 162<br>416046               | 48,974.60 | 100.00% | 3 | 3 | 3 | 0.03% | 9.88%  | FESDPAT 2.61<br>HNEPGV<br>R          | 1,555.71 |
| ATP | 6011 | SEPT11<br>protein                                                           | gi 1260108<br>11,gi 12672<br>3403,gi 162<br>416046               | 48,974.60 | 100.00% | 3 | 3 | 3 | 0.03% | 9.88%  | VNIPIIA 2.26<br>K                    | 980.6504 |
| ATP | 6011 | translocas<br>e of inner<br>mitochon<br>drial<br>membran<br>e 50<br>homolog | gi 1106656<br>40,gi 74268<br>127,gi 7804<br>2512,gi 833<br>05921 | 40,747.80 | 100.00% | 4 | 4 | 4 | 0.04% | 15.00% | IPDEFDN 4.43<br>DPILVQQ<br>LR        | 1,911.98 |
| ATP | 6011 | translocas<br>e of inner<br>mitochon<br>drial<br>membran<br>e 50<br>homolog | gi 1106656<br>40,gi 74268<br>127,gi 7804<br>2512,gi 833<br>05921 | 40,747.80 | 100.00% | 4 | 4 | 4 | 0.04% | 15.00% | QNLFFSS 2.6<br>LTSR                  | 1,299.67 |
| ATP | 6011 | translocas<br>e of inner<br>mitochon<br>drial<br>membran<br>e 50<br>homolog | gi 1106656<br>40,gi 74268<br>127,gi 7804<br>2512,gi 833<br>05921 | 40,747.80 | 100.00% | 4 | 4 | 4 | 0.04% | 15.00% | TVLEHY 3.69<br>ALEEDP<br>LEAFK       | 2,004.00 |

|     |      |                                                                                      |                                                                                                                                    |           |         |   |   |    |       |        |                         |      |          |
|-----|------|--------------------------------------------------------------------------------------|------------------------------------------------------------------------------------------------------------------------------------|-----------|---------|---|---|----|-------|--------|-------------------------|------|----------|
| ATP | 6011 | translocase of inner mitochondrial membrane 50 homolog                               | gi 110665640,gi 74268127,gi 78042512,gi 83305921                                                                                   | 40,747.80 | 100.00% | 4 | 4 | 4  | 0.04% | 15.00% | VLLDLS<br>AFLK          | 2.76 | 1,118.68 |
| ATP | 6011 | AFG3 ATPase family gene 3-like 2                                                     | gi 114051125,gi 118572819,gi 86820707                                                                                              | 89,372.80 | 100.00% | 4 | 4 | 4  | 0.04% | 5.34%  | GLGYAQ<br>YLPR          | 2.86 | 1,137.61 |
| ATP | 6011 | AFG3 ATPase family gene 3-like 2                                                     | gi 114051125,gi 118572819,gi 86820707                                                                                              | 89,372.80 | 100.00% | 4 | 4 | 4  | 0.04% | 5.34%  | GMGGLF<br>SVGETT<br>AK  | 3.25 | 1,370.66 |
| ATP | 6011 | AFG3 ATPase family gene 3-like 2                                                     | gi 114051125,gi 118572819,gi 86820707                                                                                              | 89,372.80 | 100.00% | 4 | 4 | 4  | 0.04% | 5.34%  | VGQISFD<br>LPR          | 2.95 | 1,131.62 |
| ATP | 6011 | AFG3 ATPase family gene 3-like 2                                                     | gi 114051125,gi 118572819,gi 86820707                                                                                              | 89,372.80 | 100.00% | 4 | 4 | 4  | 0.04% | 5.34%  | VSEEIFF<br>GR           | 3.14 | 1,083.55 |
| ATP | 6011 | ATP synthase, H+ transporting, mitochondrial F1 complex, gamma subunit polypeptide 1 | gi 115495411,gi 158428988,gi 158428995,gi 158429005,gi 158429012,gi 158429019,gi 158429026,gi 158431072,gi 15843874,gi 15844268047 | 30,124.50 | 100.00% | 7 | 8 | 11 | 0.12% | 45.20% | HLIIGVS<br>SDR          | 2.62 | 1,096.61 |
| ATP | 6011 | ATP synthase, H+ transporting, mitochondrial F1 complex, gamma subunit polypeptide 1 | gi 115495411,gi 158428988,gi 158428995,gi 158429005,gi 158429012,gi 158429019,gi 158429026,gi 158431072,gi 15843874,gi 15844268047 | 30,124.50 | 100.00% | 7 | 8 | 11 | 0.12% | 45.20% | IIGVGDK<br>IR           | 2.61 | 970.6046 |
| ATP | 6011 | ATP synthase, H+ transporting, mitochondrial F1 complex, gamma subunit polypeptide 1 | gi 115495411,gi 158428988,gi 158428995,gi 158429005,gi 158429012,gi 158429019,gi 158429026,gi 158431072,gi 15843874,gi 15844268047 | 30,124.50 | 100.00% | 7 | 8 | 11 | 0.12% | 45.20% | NASEMI<br>DKLTLT<br>FNR | 3.11 | 1,768.89 |

|     |      |                                                                          |                                                                                                                                   |           |         |   |   |    |       |        |                                                 |      |          |
|-----|------|--------------------------------------------------------------------------|-----------------------------------------------------------------------------------------------------------------------------------|-----------|---------|---|---|----|-------|--------|-------------------------------------------------|------|----------|
| ATP | 6011 | ATP synthase, H+ transport mitochondrial F1 complex, gamma polypeptide 1 | gi 115495411.gi 158428988.gi 158428995.gi 158429005.gi 158429012.gi 158429019.gi 158429026.gi 158431072.gi 15843874.gi 1584268047 | 30,124.50 | 100.00% | 7 | 8 | 11 | 0.12% | 45.20% | NYQEYS<br>LANIYY<br>SLK                         | 3.44 | 1,981.99 |
| ATP | 6011 | ATP synthase, H+ transport mitochondrial F1 complex, gamma polypeptide 1 | gi 115495411.gi 158428988.gi 158428995.gi 158429005.gi 158429012.gi 158429019.gi 158429026.gi 158431072.gi 15843874.gi 1584268047 | 30,124.50 | 100.00% | 7 | 8 | 11 | 0.12% | 45.20% | RPPTFG<br>DASVIAL<br>ELLNSG<br>YEFDEG<br>SIIFNR | 4.83 | 3,427.72 |
| ATP | 6011 | ATP synthase, H+ transport mitochondrial F1 complex, gamma polypeptide 1 | gi 115495411.gi 158428988.gi 158428995.gi 158429005.gi 158429012.gi 158429019.gi 158429026.gi 158431072.gi 15843874.gi 1584268047 | 30,124.50 | 100.00% | 7 | 8 | 11 | 0.12% | 45.20% | TEEKPIF<br>SLDTISS<br>AESMSIY<br>DDIDAD<br>VLR  | 5.93 | 3,376.60 |
| ATP | 6011 | ATP synthase, H+ transport mitochondrial F1 complex, gamma polypeptide 1 | gi 115495411.gi 158428988.gi 158428995.gi 158429005.gi 158429012.gi 158429019.gi 158429026.gi 158431072.gi 15843874.gi 1584268047 | 30,124.50 | 100.00% | 7 | 8 | 11 | 0.12% | 45.20% | VYGVGS<br>LALYEK                                | 3.07 | 1,298.70 |
| ATP | 6011 | transgelin 2                                                             | gi 59858295.gi 61888874.gi 73919851                                                                                               | 22,408.90 | 100.00% | 3 | 4 | 4  | 0.04% | 18.60% | QMEQIS<br>QFLQAA<br>ER                          | 3.98 | 1,694.82 |
| ATP | 6011 | transgelin 2                                                             | gi 59858295.gi 61888874.gi 73919851                                                                                               | 22,408.90 | 100.00% | 3 | 4 | 4  | 0.04% | 18.60% | TLMNLG<br>GLAVAR                                | 3.97 | 1,231.68 |
| ATP | 6011 | transgelin 2                                                             | gi 59858295.gi 61888874.gi 73919851                                                                                               | 22,408.90 | 100.00% | 3 | 4 | 4  | 0.04% | 18.60% | YFSDNQ<br>LQEGK                                 | 2.73 | 1,328.61 |

|     |      |                                                                                                            |            |           |         |   |   |   |       |        |                    |      |          |
|-----|------|------------------------------------------------------------------------------------------------------------|------------|-----------|---------|---|---|---|-------|--------|--------------------|------|----------|
| ATP | 6011 | PREDIC TED: 09<br>similar to Heparan sulfate 2-O-sulfotransferase 1 (2-O-sulfotransferase) (2OST), partial | gi 1198899 | 37,063.70 | 99.80%  | 2 | 2 | 3 | 0.03% | 6.69%  | LVSYYY FLR         | 2.72 | 1,223.65 |
| ATP | 6011 | PREDIC TED: 09<br>similar to Heparan sulfate 2-O-sulfotransferase 1 (2-O-sulfotransferase) (2OST), partial | gi 1198899 | 37,063.70 | 99.80%  | 2 | 2 | 3 | 0.03% | 6.69%  | NNPVMS LQDQVR      | 3.45 | 1,416.69 |
| ATP | 6011 | PREDIC TED: 52<br>similar to transferri n receptor                                                         | gi 1198796 | 85,420.40 | 100.00% | 7 | 7 | 8 | 0.09% | 10.70% | IMKVEY HLLSPY VSPR | 2.6  | 1,948.04 |
| ATP | 6011 | PREDIC TED: 52<br>similar to transferri n receptor                                                         | gi 1198796 | 85,420.40 | 100.00% | 7 | 7 | 8 | 0.09% | 10.70% | LAADEE ENVDSN MR   | 3.73 | 1,608.68 |
| ATP | 6011 | PREDIC TED: 52<br>similar to transferri n receptor                                                         | gi 1198796 | 85,420.40 | 100.00% | 7 | 7 | 8 | 0.09% | 10.70% | MLNENS YVPR        | 2.79 | 1,238.58 |
| ATP | 6011 | PREDIC TED: 52<br>similar to transferri n receptor                                                         | gi 1198796 | 85,420.40 | 100.00% | 7 | 7 | 8 | 0.09% | 10.70% | SAFSNLF GGEPLS YTR | 4.05 | 1,745.85 |
| ATP | 6011 | PREDIC TED: 52<br>similar to transferri n receptor                                                         | gi 1198796 | 85,420.40 | 100.00% | 7 | 7 | 8 | 0.09% | 10.70% | SSVGTSL LLTLAR     | 2.21 | 1,317.77 |
| ATP | 6011 | PREDIC TED: 52<br>similar to transferri n receptor                                                         | gi 1198796 | 85,420.40 | 100.00% | 7 | 7 | 8 | 0.09% | 10.70% | VEYHLL SPYVSPR     | 3.52 | 1,559.82 |
| ATP | 6011 | PREDIC TED: 52<br>similar to transferri n receptor                                                         | gi 1198796 | 85,420.40 | 100.00% | 7 | 7 | 8 | 0.09% | 10.70% | VSASPLL YSLIEK     | 3.58 | 1,419.81 |

|     |      |                                             |                                                              |            |         |   |   |    |       |        |                                                  |          |
|-----|------|---------------------------------------------|--------------------------------------------------------------|------------|---------|---|---|----|-------|--------|--------------------------------------------------|----------|
| ATP | 6011 | Caveolin 2                                  | gi 157279219,gi 38322700,gi 51512145,gi 56119130,gi 66774044 | 18,142.30  | 100.00% | 3 | 3 | 5  | 0.05% | 27.20% | ADVQLF 2.7<br>MDDDSY<br>SR                       | 1,677.71 |
| ATP | 6011 | Caveolin 2                                  | gi 157279219,gi 38322700,gi 51512145,gi 56119130,gi 66774044 | 18,142.30  | 100.00% | 3 | 3 | 5  | 0.05% | 27.20% | SFSSVSL 2.99<br>QLSHD                            | 1,306.63 |
| ATP | 6011 | Caveolin 2                                  | gi 157279219,gi 38322700,gi 51512145,gi 56119130,gi 66774044 | 18,142.30  | 100.00% | 3 | 3 | 5  | 0.05% | 27.20% | VG FEDVI 3.88<br>AEPVST<br>HSFDK                 | 1,976.96 |
| ATP | 6011 | calcium binding protein P22                 | gi 115497570,gi 122142989,gi 152941188,gi 74354201           | 22,425.20  | 100.00% | 2 | 2 | 2  | 0.02% | 14.40% | IINAFFPE 3.23<br>GEDQVN<br>FR                    | 1,895.93 |
| ATP | 6011 | calcium binding protein P22                 | gi 115497570,gi 122142989,gi 152941188,gi 74354201           | 22,425.20  | 100.00% | 2 | 2 | 2  | 0.02% | 14.40% | IPELAINP 3.78<br>LGDR                            | 1,307.73 |
| ATP | 6011 | ACTN4 protein                               | gi 146186472,gi 148238040,gi 162416099                       | 104,913.30 | 99.80%  | 2 | 2 | 2  | 0.02% | 4.50%  | LSNRPAF 3.11<br>MPSEGK                           | 1,449.72 |
| ATP | 6011 | ACTN4 protein                               | gi 146186472,gi 148238040,gi 162416099                       | 104,913.30 | 99.80%  | 2 | 2 | 2  | 0.02% | 4.50%  | SIVDYKP 2.8<br>NLDLLE<br>QQHQLI<br>QEALIFD<br>NK | 3,324.75 |
| ATP | 6011 | Chromosome 9 open reading frame 46 ortholog | gi 74354529,gi 77735799                                      | 17,091.30  | 99.80%  | 2 | 3 | 3  | 0.03% | 15.60% | GMITFES 2.87<br>LEK                              | 1,170.57 |
| ATP | 6011 | Chromosome 9 open reading frame 46 ortholog | gi 74354529,gi 77735799                                      | 17,091.30  | 99.80%  | 2 | 3 | 3  | 0.03% | 15.60% | MKGEAE 4.23<br>NILETEK                           | 1,507.73 |
| ATP | 6011 | STAT1 protein 44                            | gi 154426144                                                 | 86,914.50  | 99.80%  | 2 | 2 | 2  | 0.02% | 3.35%  | ELSAVTF 3.19<br>PDIIR                            | 1,360.75 |
| ATP | 6011 | STAT1 protein 44                            | gi 154426144                                                 | 86,914.50  | 99.80%  | 2 | 2 | 2  | 0.02% | 3.35%  | VMAAEN 3.69<br>IPENPLK                           | 1,441.74 |
| ATP | 6011 | non-classical MHC class I antigen           | gi 157785629,gi 83638606                                     | 38,884.20  | 100.00% | 4 | 4 | 14 | 0.15% | 22.20% | DYLALN 3.77<br>EDLR                              | 1,221.61 |
| ATP | 6011 | non-classical MHC class I antigen           | gi 157785629,gi 83638606                                     | 38,884.20  | 100.00% | 4 | 4 | 14 | 0.15% | 22.20% | FITVGYV 3.58<br>DDTQFV<br>R                      | 1,659.84 |

|     |      |                                                                                                                                                                     |                                                 |           |         |   |   |    |       |        |                                           |          |
|-----|------|---------------------------------------------------------------------------------------------------------------------------------------------------------------------|-------------------------------------------------|-----------|---------|---|---|----|-------|--------|-------------------------------------------|----------|
| ATP | 6011 | non-classical MHC class I antigen                                                                                                                                   | gi 157785629,gi 83638606                        | 38,884.20 | 100.00% | 4 | 4 | 14 | 0.15% | 22.20% | NGEDQT 2.76<br>QDMELV<br>ETRPSG<br>DGTFQK | 2,698.19 |
| ATP | 6011 | non-classical MHC class I antigen                                                                                                                                   | gi 157785629,gi 83638606                        | 38,884.20 | 100.00% | 4 | 4 | 14 | 0.15% | 22.20% | VQHEGL 4.18<br>QEPLTLR                    | 1,519.82 |
| ATP | 6011 | non-classical MHC class I antigen                                                                                                                                   | gi 157785629,gi 83638606                        | 38,884.20 | 100.00% | 4 | 4 | 14 | 0.15% | 22.20% | YFLTAV 2.55<br>SR                         | 956.5199 |
| ATP | 6011 | non-classical MHC class I antigen                                                                                                                                   | gi 157785629,gi 83638606                        | 38,884.20 | 100.00% | 4 | 4 | 14 | 0.15% | 22.20% | YFLTAV 3.23<br>SRPGLG<br>EPR              | 1,662.90 |
| ATP | 6011 | RecName : Full=Guanine nucleotide e-binding protein subunit alpha-11; Short=G-protein subunit alpha-11; Short=G alpha-11; AltName: Full=G-protein subunit GL2 alpha | gi 1169852,gi 1337774,gi 82,gi 217568,gi 278057 | 41,360.90 | 100.00% | 3 | 3 | 3  | 0.03% | 12.70% | DTILQLN 2.6<br>LK                         | 1,057.63 |
| ATP | 6011 | RecName : Full=Guanine nucleotide e-binding protein subunit alpha-11; Short=G-protein subunit alpha-11; Short=G alpha-11; AltName: Full=G-protein subunit GL2 alpha | gi 1169852,gi 1337774,gi 82,gi 217568,gi 278057 | 41,360.90 | 100.00% | 3 | 3 | 3  | 0.03% | 12.70% | IATSGYL 3.82<br>PTQQDV<br>LR              | 1,661.89 |



|     |      |                                                                                                                                                                                                                                   |                                        |            |        |   |   |       |        |                                   |                    |          |          |
|-----|------|-----------------------------------------------------------------------------------------------------------------------------------------------------------------------------------------------------------------------------------|----------------------------------------|------------|--------|---|---|-------|--------|-----------------------------------|--------------------|----------|----------|
| ATP | 6011 | RecName<br>:<br>Full=Gua<br>nine<br>nucleotid<br>e-binding<br>protein<br>subunit<br>alpha-11;<br>Short=G-<br>protein<br>subunit<br>alpha-11;<br>Short=G<br>alpha-11;<br>AltName:<br>Full=G-<br>protein<br>subunit<br>GL2<br>alpha | gi 1169852, 41,360.90                  | 100.00%    | 3      | 3 | 3 | 0.03% | 12.70% | VRVPTT<br>GIIEYPF<br>DLENIIF<br>R | 5.53               | 2,492.36 |          |
| ATP | 6011 | RecName<br>:<br>Full=Hex<br>okinase-<br>I;<br>AltName:<br>Full=Hex<br>okinase<br>type I;<br>Short=H<br>K I;<br>AltName:<br>Full=Brain<br>form<br>hexokinase                                                                       | gi 123891,g<br>i 163152,gi<br>27805797 | 103,049.20 | 99.80% | 2 | 2 | 2     | 0.02%  | 10.60%                            | GAAMVT<br>AVAYR    | 3.27     | 1,125.57 |
| ATP | 6011 | RecName<br>:<br>Full=Hex<br>okinase-<br>I;<br>AltName:<br>Full=Hex<br>okinase<br>type I;<br>Short=H<br>K I;<br>AltName:<br>Full=Brain<br>form<br>hexokinase                                                                       | gi 123891,g<br>i 163152,gi<br>27805797 | 103,049.20 | 99.80% | 2 | 2 | 2     | 0.02%  | 10.60%                            | GDFIALD<br>LGGSSFR | 3.29     | 1,454.73 |

|     |      |                                                                                                                                                                                                  |            |        |   |   |   |       |        |                                                                      |          |
|-----|------|--------------------------------------------------------------------------------------------------------------------------------------------------------------------------------------------------|------------|--------|---|---|---|-------|--------|----------------------------------------------------------------------|----------|
| ATP | 6011 | RecName gi 123891.g<br>: i 163152.gi<br>Full=Hex 27805797<br>okinase-<br>I;<br>AltName:<br>Full=Hex<br>okinase<br>type I;<br>Short=H<br>K I;<br>AltName:<br>Full=Brain<br>form<br>hexokina<br>se | 103,049.20 | 99.80% | 2 | 2 | 2 | 0.02% | 10.60% | GKFNTS 3.99<br>DVSAIEK                                               | 1,395.71 |
| ATP | 6011 | RecName gi 123891.g<br>: i 163152.gi<br>Full=Hex 27805797<br>okinase-<br>I;<br>AltName:<br>Full=Hex<br>okinase<br>type I;<br>Short=H<br>K I;<br>AltName:<br>Full=Brain<br>form<br>hexokina<br>se | 103,049.20 | 99.80% | 2 | 2 | 2 | 0.02% | 10.60% | KETNSN 2.19<br>ATVNML<br>PSFLRSIP<br>DGTEDG<br>DFLALD<br>LGGTNF<br>R | 4,213.05 |
| ATP | 6011 | RecName gi 123891.g<br>: i 163152.gi<br>Full=Hex 27805797<br>okinase-<br>I;<br>AltName:<br>Full=Hex<br>okinase<br>type I;<br>Short=H<br>K I;<br>AltName:<br>Full=Brain<br>form<br>hexokina<br>se | 103,049.20 | 99.80% | 2 | 2 | 2 | 0.02% | 10.60% | LSDETL 4.01<br>DIMNR                                                 | 1,435.71 |

|     |      |                                                                                                                                                                                                  |            |         |   |   |   |       |        |                                         |          |
|-----|------|--------------------------------------------------------------------------------------------------------------------------------------------------------------------------------------------------|------------|---------|---|---|---|-------|--------|-----------------------------------------|----------|
| ATP | 6011 | RecName gi 123891.g<br>: i 163152.gi<br>Full=Hex 27805797<br>okinase-<br>I;<br>AltName:<br>Full=Hex<br>okinase<br>type I;<br>Short=H<br>K I;<br>AltName:<br>Full=Brain<br>form<br>hexokina<br>se | 103,049.20 | 99.80%  | 2 | 2 | 2 | 0.02% | 10.60% | SIPDGSE 3.47<br>KGDFIAL<br>DLGGSS<br>FR | 2,268.11 |
| ATP | 6011 | RecName gi 123891.g<br>: i 163152.gi<br>Full=Hex 27805797<br>okinase-<br>I;<br>AltName:<br>Full=Hex<br>okinase<br>type I;<br>Short=H<br>K I;<br>AltName:<br>Full=Brain<br>form<br>hexokina<br>se | 103,049.20 | 99.80%  | 2 | 2 | 2 | 0.02% | 10.60% | SIPDGTE 3.91<br>DGDFLA<br>LDLGGT<br>NFR | 2,310.09 |
| ATP | 6011 | mitochon<br>drial gi 1586461<br>6,gi 201390<br>NADH:u 62,gi 28603<br>biquinon 804,gi 7426<br>e 8330<br>oxidored<br>uctase<br>B16.6<br>subunit                                                    | 16,655.90  | 100.00% | 3 | 4 | 5 | 0.05% | 26.40% | IALMPLL 3.44<br>QAEK                    | 1,242.71 |
| ATP | 6011 | mitochon<br>drial gi 1586461<br>6,gi 201390<br>NADH:u 62,gi 28603<br>biquinon 804,gi 7426<br>e 8330<br>oxidored<br>uctase<br>B16.6<br>subunit                                                    | 16,655.90  | 100.00% | 3 | 4 | 5 | 0.05% | 26.40% | LQIEDFE 2.85<br>AR                      | 1,120.56 |
| ATP | 6011 | mitochon<br>drial gi 1586461<br>6,gi 201390<br>NADH:u 62,gi 28603<br>biquinon 804,gi 7426<br>e 8330<br>oxidored<br>uctase<br>B16.6<br>subunit                                                    | 16,655.90  | 100.00% | 3 | 4 | 5 | 0.05% | 26.40% | VKQDMP 4.08<br>PVGGYG<br>PIDYKR         | 2,036.03 |

|     |      |                                                                                                                                    |                                                                                 |           |         |    |    |    |       |        |                                               |      |          |
|-----|------|------------------------------------------------------------------------------------------------------------------------------------|---------------------------------------------------------------------------------|-----------|---------|----|----|----|-------|--------|-----------------------------------------------|------|----------|
| ATP | 6011 | Tyrosine<br>3-<br>monooxy<br>genase/tr<br>yptophan<br>5-<br>monooxy<br>genase<br>activation<br>protein,<br>beta<br>polypepti<br>de | gi 1113070<br>57,gi 11543<br>2055,gi 285<br>2383,gi 711<br>53774                | 28,065.10 | 100.00% | 3  | 4  | 5  | 0.05% | 25.60% | AVTEQG<br>HELSNE<br>ER                        | 2.31 | 1,598.74 |
| ATP | 6011 | Tyrosine<br>3-<br>monooxy<br>genase/tr<br>yptophan<br>5-<br>monooxy<br>genase<br>activation<br>protein,<br>beta<br>polypepti<br>de | gi 1113070<br>57,gi 11543<br>2055,gi 285<br>2383,gi 711<br>53774                | 28,065.10 | 100.00% | 3  | 4  | 5  | 0.05% | 25.60% | QTTVSN<br>SQQAYQ<br>EAFEISK<br>K              | 3.05 | 2,287.12 |
| ATP | 6011 | Tyrosine<br>3-<br>monooxy<br>genase/tr<br>yptophan<br>5-<br>monooxy<br>genase<br>activation<br>protein,<br>beta<br>polypepti<br>de | gi 1113070<br>57,gi 11543<br>2055,gi 285<br>2383,gi 711<br>53774                | 28,065.10 | 100.00% | 3  | 4  | 5  | 0.05% | 25.60% | TAFDEAI<br>AELDTL<br>NEESYK<br>DSTLIM<br>QLLR | 3.91 | 3,345.64 |
| ATP | 6011 | basigin                                                                                                                            | gi 1154961<br>27,gi 12041<br>9551,gi 154<br>425710,gi 1<br>56713141,gi 73587049 | 29,754.80 | 100.00% | 4  | 4  | 5  | 0.05% | 21.80% | FFVVSSE<br>SR                                 | 3.09 | 1,057.53 |
| ATP | 6011 | basigin                                                                                                                            | gi 1154961<br>27,gi 12041<br>9551,gi 154<br>425710,gi 1<br>56713141,gi 73587049 | 29,754.80 | 100.00% | 4  | 4  | 5  | 0.05% | 21.80% | RKPDEV<br>LDDEDI<br>GSAPLK                    | 5.59 | 1,997.02 |
| ATP | 6011 | basigin                                                                                                                            | gi 1154961<br>27,gi 12041<br>9551,gi 154<br>425710,gi 1<br>56713141,gi 73587049 | 29,754.80 | 100.00% | 4  | 4  | 5  | 0.05% | 21.80% | TELHIPN<br>VDLK                               | 2.48 | 1,278.71 |
| ATP | 6011 | basigin                                                                                                                            | gi 1154961<br>27,gi 12041<br>9551,gi 154<br>425710,gi 1<br>56713141,gi 73587049 | 29,754.80 | 100.00% | 4  | 4  | 5  | 0.05% | 21.80% | VLKEDA<br>LPDLKT<br>EYEVDS<br>EDR             | 4.95 | 2,464.21 |
| ATP | 6011 | Tubulin,<br>beta 2C                                                                                                                | gi 7577358<br>3,gi 777362<br>71                                                 | 49,812.70 | 100.00% | 12 | 12 | 16 | 0.17% | 40.40% | AVLVDL<br>EPGTMD<br>SVR                       | 3.02 | 1,617.82 |

|     |      |                                          |                                  |           |         |    |    |    |       |        |                                                                 |      |          |
|-----|------|------------------------------------------|----------------------------------|-----------|---------|----|----|----|-------|--------|-----------------------------------------------------------------|------|----------|
| ATP | 6011 | Tubulin, beta 2C                         | gi 7577358<br>3,gi 777362<br>71  | 49,812.70 | 100.00% | 12 | 12 | 16 | 0.17% | 40.40% | EAESCD<br>CLQGFQ<br>LTHSLG<br>GGTGSG<br>MGTLIS<br>K             | 3.88 | 3,213.49 |
| ATP | 6011 | Tubulin, beta 2C                         | gi 7577358<br>3,gi 777362<br>71  | 49,812.70 | 100.00% | 12 | 12 | 16 | 0.17% | 40.40% | EVDEQM<br>LNVQNK                                                | 2.82 | 1,462.68 |
| ATP | 6011 | Tubulin, beta 2C                         | gi 7577358<br>3,gi 777362<br>71  | 49,812.70 | 100.00% | 12 | 12 | 16 | 0.17% | 40.40% | GHYTEG<br>AELVDS<br>VLDVVR                                      | 3.5  | 1,958.98 |
| ATP | 6011 | Tubulin, beta 2C                         | gi 7577358<br>3,gi 777362<br>71  | 49,812.70 | 100.00% | 12 | 12 | 16 | 0.17% | 40.40% | GHYTEG<br>AELVDS<br>VLDVVR<br>K                                 | 3.56 | 2,087.08 |
| ATP | 6011 | Tubulin, beta 2C                         | gi 7577358<br>3,gi 777362<br>71  | 49,812.70 | 100.00% | 12 | 12 | 16 | 0.17% | 40.40% | IMNTFSV<br>VPSPK                                                | 3.78 | 1,335.70 |
| ATP | 6011 | Tubulin, beta 2C                         | gi 7577358<br>3,gi 777362<br>71  | 49,812.70 | 100.00% | 12 | 12 | 16 | 0.17% | 40.40% | IREEYPD<br>RIMNTFS<br>VVPSPK                                    | 3.08 | 2,394.21 |
| ATP | 6011 | Tubulin, beta 2C                         | gi 7577358<br>3,gi 777362<br>71  | 49,812.70 | 100.00% | 12 | 12 | 16 | 0.17% | 40.40% | ISEQFTA<br>MFR                                                  | 3    | 1,245.59 |
| ATP | 6011 | Tubulin, beta 2C                         | gi 7577358<br>3,gi 777362<br>71  | 49,812.70 | 100.00% | 12 | 12 | 16 | 0.17% | 40.40% | LAVNMV<br>PFPR                                                  | 3.53 | 1,159.63 |
| ATP | 6011 | Tubulin, beta 2C                         | gi 7577358<br>3,gi 777362<br>71  | 49,812.70 | 100.00% | 12 | 12 | 16 | 0.17% | 40.40% | LHFFMP<br>GFAPLTS<br>R                                          | 3.38 | 1,636.83 |
| ATP | 6011 | Tubulin, beta 2C                         | gi 7577358<br>3,gi 777362<br>71  | 49,812.70 | 100.00% | 12 | 12 | 16 | 0.17% | 40.40% | VSDTVV<br>EPYNAT<br>LSVHQL<br>VENTDE<br>TYCIDNE<br>ALYDICF<br>R | 4.25 | 4,479.06 |
| ATP | 6011 | Tubulin, beta 2C                         | gi 7577358<br>3,gi 777362<br>71  | 49,812.70 | 100.00% | 12 | 12 | 16 | 0.17% | 40.40% | YLTVAA<br>VFR                                                   | 2.56 | 1,039.59 |
| ATP | 6011 | chromatin<br>modifyin<br>g protein<br>4C | gi 1140517<br>54,gi 87578<br>327 | 26,417.80 | 99.80%  | 2  | 2  | 2  | 0.02% | 12.30% | EALENS<br>YTNTEV<br>LK                                          | 3.32 | 1,610.79 |
| ATP | 6011 | chromatin<br>modifyin<br>g protein<br>4C | gi 1140517<br>54,gi 87578<br>327 | 26,417.80 | 99.80%  | 2  | 2  | 2  | 0.02% | 12.30% | LPNAPSS<br>SLPAQP<br>DR                                         | 3.66 | 1,549.80 |

|     |      |                                                                                                                                                                                                                                                                                                                           |           |         |   |   |   |       |        |                             |          |
|-----|------|---------------------------------------------------------------------------------------------------------------------------------------------------------------------------------------------------------------------------------------------------------------------------------------------------------------------------|-----------|---------|---|---|---|-------|--------|-----------------------------|----------|
| ATP | 6011 | RecName gi 2152742 :<br>38,gi 27806<br>Full=Pept 469,gi 5292<br>idyl- 42,gi 59858<br>prolyl cis- 297,gi 7426<br>trans 8324<br>isomerase<br>B;<br>Short=PP<br>Iase;<br>Short=Ro<br>tamase;<br>AltName:<br>Full=Cyc<br>lophilin<br>B;<br>AltName:<br>Full=S-<br>cyclophili<br>n;<br>Short=SC<br>YLP;<br>Flags:<br>Precursor | 23,726.00 | 99.90%  | 2 | 2 | 3 | 0.03% | 12.50% | TVDNFV 4.53<br>ALATGE<br>K  | 1,364.71 |
| ATP | 6011 | RecName gi 2152742 :<br>38,gi 27806<br>Full=Pept 469,gi 5292<br>idyl- 42,gi 59858<br>prolyl cis- 297,gi 7426<br>trans 8324<br>isomerase<br>B;<br>Short=PP<br>Iase;<br>Short=Ro<br>tamase;<br>AltName:<br>Full=Cyc<br>lophilin<br>B;<br>AltName:<br>Full=S-<br>cyclophili<br>n;<br>Short=SC<br>YLP;<br>Flags:<br>Precursor | 23,726.00 | 99.90%  | 2 | 2 | 3 | 0.03% | 12.50% | VIKDFMI 3.25<br>QGGDFT<br>R | 1,642.83 |
| ATP | 6011 | FLOT2 gi 1515536 23,gi 16445<br>protein 2939                                                                                                                                                                                                                                                                              | 46,976.90 | 100.00% | 4 | 4 | 4 | 0.04% | 10.70% | MALVLD 3.44<br>ALPR         | 1,114.63 |
| ATP | 6011 | FLOT2 gi 1515536 23,gi 16445<br>protein 2939                                                                                                                                                                                                                                                                              | 46,976.90 | 100.00% | 4 | 4 | 4 | 0.04% | 10.70% | NVVLQT 1.94<br>LEGHLR       | 1,378.78 |
| ATP | 6011 | FLOT2 gi 1515536 23,gi 16445<br>protein 2939                                                                                                                                                                                                                                                                              | 46,976.90 | 100.00% | 4 | 4 | 4 | 0.04% | 10.70% | QVLLAQ 2.82<br>AEAEEK       | 1,199.66 |
| ATP | 6011 | FLOT2 gi 1515536 23,gi 16445<br>protein 2939                                                                                                                                                                                                                                                                              | 46,976.90 | 100.00% | 4 | 4 | 4 | 0.04% | 10.70% | VDEIVV 2.85<br>LSGDNS<br>K  | 1,374.71 |

|     |      |                                                                                                                                                                   |                      |        |   |   |   |       |        |                                     |      |          |
|-----|------|-------------------------------------------------------------------------------------------------------------------------------------------------------------------|----------------------|--------|---|---|---|-------|--------|-------------------------------------|------|----------|
| ATP | 6011 | RecName gi 1162485 : 78,gi 74268 Full=GPI 100,gi 7773 transamid 5383 ase compone nt PIG-S; AltName: Full=Phosphatidylinositol-glycan biosynthesis class S protein | 61,769.20            | 99.80% | 2 | 2 | 2 | 0.02% | 8.11%  | APLPYS QISGLNS LK                   | 3.83 | 1,587.87 |
| ATP | 6011 | RecName gi 1162485 : 78,gi 74268 Full=GPI 100,gi 7773 transamid 5383 ase compone nt PIG-S; AltName: Full=Phosphatidylinositol-glycan biosynthesis class S protein | 61,769.20            | 99.80% | 2 | 2 | 2 | 0.02% | 8.11%  | LMVPVT VVFTQE SVPLDD QEKL PFT VVHER | 4.46 | 3,468.81 |
| ATP | 6011 | PREDICTED: phosphoenolpyruvate carboxylase 2 (mitochondrial) isoform 1                                                                                            | gi 1946703 70,632.70 | 99.80% | 2 | 2 | 2 | 0.02% | 3.91%  | EVLAELEALEGR                        | 2.54 | 1,328.71 |
| ATP | 6011 | PREDICTED: phosphoenolpyruvate carboxylase 2 (mitochondrial) isoform 1                                                                                            | gi 1946703 70,632.70 | 99.80% | 2 | 2 | 2 | 0.02% | 3.91%  | SYLTEQ VNQDLPK                      | 3.26 | 1,534.77 |
| ATP | 6011 | PREDICTED: similar to mCG107 isoform 1                                                                                                                            | gi 1198892 13,725.00 | 99.80% | 2 | 2 | 2 | 0.02% | 15.20% | AALQEL LSK                          | 3.28 | 972.5725 |

|     |      |                                                                         |                                                                                        |           |         |   |   |   |       |        |                                                 |          |
|-----|------|-------------------------------------------------------------------------|----------------------------------------------------------------------------------------|-----------|---------|---|---|---|-------|--------|-------------------------------------------------|----------|
| ATP | 6011 | PREDICTED:<br>similar to<br>mCG10725<br>isoform 1                       | gi 119889261,gi 119912821,gi 194673249,gi 58760422,gi 70778964,gi 74354988,gi 75052080 | 13,725.00 | 99.80%  | 2 | 2 | 2 | 0.02% | 15.20% | LITPAVV 2.13<br>SER                             | 1,084.64 |
| ATP | 6011 | YWHAG protein                                                           | gi 157279400,gi 157744500,gi 2852385,gi 71153781                                       | 28,285.10 | 99.80%  | 2 | 2 | 2 | 0.02% | 17.40% | NVTELN 4.11<br>EPLSNEER                         | 1,643.79 |
| ATP | 6011 | YWHAG protein                                                           | gi 157279400,gi 157744500,gi 2852385,gi 71153781                                       | 28,285.10 | 99.80%  | 2 | 2 | 2 | 0.02% | 17.40% | TAFDDAI 3<br>AELDTL<br>NEDSYK<br>DSTLIM<br>QLLR | 3,317.61 |
| ATP | 6011 | Chain C, Subcomp lex Of The Stator Of Bovine Mitochondrial Atp Synthase | gi 110591028,gi 110591031,gi 114687,gi 163036,gi 27807291,gi 55670489,gi 73586602      | 12,514.70 | 100.00% | 5 | 5 | 7 | 0.08% | 44.40% | ADMNTF 3.25<br>PNFTFED<br>PKFEVV<br>EKPQS       | 2,833.30 |
| ATP | 6011 | Chain C, Subcomp lex Of The Stator Of Bovine Mitochondrial Atp Synthase | gi 110591028,gi 110591031,gi 114687,gi 163036,gi 27807291,gi 55670489,gi 73586602      | 12,514.70 | 100.00% | 5 | 5 | 7 | 0.08% | 44.40% | QTSGGP 4.06<br>VDAGPE<br>YQDDLDR                | 2,032.92 |
| ATP | 6011 | Chain C, Subcomp lex Of The Stator Of Bovine Mitochondrial Atp Synthase | gi 110591028,gi 110591031,gi 114687,gi 163036,gi 27807291,gi 55670489,gi 73586602      | 12,514.70 | 100.00% | 5 | 5 | 7 | 0.08% | 44.40% | QTSGGP 3.48<br>VDAGPE<br>YQDDL<br>RELFK         | 2,550.21 |
| ATP | 6011 | Chain C, Subcomp lex Of The Stator Of Bovine Mitochondrial Atp Synthase | gi 110591028,gi 110591031,gi 114687,gi 163036,gi 27807291,gi 55670489,gi 73586602      | 12,514.70 | 100.00% | 5 | 5 | 7 | 0.08% | 44.40% | RQTSGG 4.11<br>PVDAGP<br>EYQDDL<br>DR           | 2,189.02 |
| ATP | 6011 | Chain C, Subcomp lex Of The Stator Of Bovine Mitochondrial Atp Synthase | gi 110591028,gi 110591031,gi 114687,gi 163036,gi 27807291,gi 55670489,gi 73586602      | 12,514.70 | 100.00% | 5 | 5 | 7 | 0.08% | 44.40% | RQTSGG 4.99<br>PVDAGP<br>EYQDDL<br>DRELFK       | 2,706.31 |



|     |      |                                                                |                                                                                                                                                                                    |            |         |   |   |   |       |        |                                           |      |          |
|-----|------|----------------------------------------------------------------|------------------------------------------------------------------------------------------------------------------------------------------------------------------------------------|------------|---------|---|---|---|-------|--------|-------------------------------------------|------|----------|
| ATP | 6011 | heterogen<br>eous<br>nuclear<br>ribonucle<br>oprotein<br>A2/B1 | gi 1140517<br>56,gi 12214<br>5945,gi 875<br>78315                                                                                                                                  | 35,988.50  | 99.80%  | 2 | 3 | 3 | 0.03% | 13.20% | GFGFVT<br>FDDHDP<br>VDKIVL<br>QK          | 2.98 | 2,277.16 |
| ATP | 6011 | heterogen<br>eous<br>nuclear<br>ribonucle<br>oprotein<br>A2/B1 | gi 1140517<br>56,gi 12214<br>5945,gi 875<br>78315                                                                                                                                  | 35,988.50  | 99.80%  | 2 | 3 | 3 | 0.03% | 13.20% | NMGGPY<br>GGGNYG<br>PGGSGG<br>SGGYGG<br>R | 5.21 | 2,205.90 |
| ATP | 6011 | RecName<br>:<br>Full=Clat<br>hrin<br>heavy<br>chain 1          | gi 1705915,<br>gi 2780668<br>9,gi 565545<br>48,gi 56554<br>549,gi 5655<br>4550,gi 565<br>54551,gi 56<br>554552,gi 5<br>6554553,gi <br>56554554,g<br>i 56554555,<br>gi 5655455<br>6 | 186,919.60 | 100.00% | 9 | 9 | 9 | 0.10% | 9.20%  | ISGETIF<br>VTAPHE<br>ATAGIIG<br>VNR       | 4.1  | 2,353.25 |
| ATP | 6011 | RecName<br>:<br>Full=Clat<br>hrin<br>heavy<br>chain 1          | gi 1705915,<br>gi 2780668<br>9,gi 565545<br>48,gi 56554<br>549,gi 5655<br>4550,gi 565<br>54551,gi 56<br>554552,gi 5<br>6554553,gi <br>56554554,g<br>i 56554555,<br>gi 5655455<br>6 | 186,919.60 | 100.00% | 9 | 9 | 9 | 0.10% | 9.20%  | IYIDSN<br>NPER                            | 2.66 | 1,334.63 |
| ATP | 6011 | RecName<br>:<br>Full=Clat<br>hrin<br>heavy<br>chain 1          | gi 1705915,<br>gi 2780668<br>9,gi 565545<br>48,gi 56554<br>549,gi 5655<br>4550,gi 565<br>54551,gi 56<br>554552,gi 5<br>6554553,gi <br>56554554,g<br>i 56554555,<br>gi 5655455<br>6 | 186,919.60 | 100.00% | 9 | 9 | 9 | 0.10% | 9.20%  | KFDVNT<br>SAVQVLI<br>EHIGNL<br>DR         | 4.08 | 2,368.26 |
| ATP | 6011 | RecName<br>:<br>Full=Clat<br>hrin<br>heavy<br>chain 1          | gi 1705915,<br>gi 2780668<br>9,gi 565545<br>48,gi 56554<br>549,gi 5655<br>4550,gi 565<br>54551,gi 56<br>554552,gi 5<br>6554553,gi <br>56554554,g<br>i 56554555,<br>gi 5655455<br>6 | 186,919.60 | 100.00% | 9 | 9 | 9 | 0.10% | 9.20%  | LAELEEF<br>INGPNN<br>AHIQVQ<br>GDR        | 2.99 | 2,464.22 |

|     |      |                                                       |                                                                                                                                                                                    |            |         |   |   |   |       |       |                                 |      |          |
|-----|------|-------------------------------------------------------|------------------------------------------------------------------------------------------------------------------------------------------------------------------------------------|------------|---------|---|---|---|-------|-------|---------------------------------|------|----------|
| ATP | 6011 | RecName<br>:<br>Full=Clat<br>hrin<br>heavy<br>chain 1 | gi 1705915,<br>gi 2780668<br>9,gi 565545<br>48,gi 56554<br>549,gi 5655<br>4550,gi 565<br>54551,gi 56<br>554552,gi 5<br>6554553,gi <br>56554554,g<br>i 56554555,<br>gi 5655455<br>6 | 186,919.60 | 100.00% | 9 | 9 | 9 | 0.10% | 9.20% | LASTLV<br>HLGEYQ<br>AAVDGA<br>R | 2.88 | 1,971.03 |
| ATP | 6011 | RecName<br>:<br>Full=Clat<br>hrin<br>heavy<br>chain 1 | gi 1705915,<br>gi 2780668<br>9,gi 565545<br>48,gi 56554<br>549,gi 5655<br>4550,gi 565<br>54551,gi 56<br>554552,gi 5<br>6554553,gi <br>56554554,g<br>i 56554555,<br>gi 5655455<br>6 | 186,919.60 | 100.00% | 9 | 9 | 9 | 0.10% | 9.20% | NNLAGA<br>EELFAR                | 3.01 | 1,304.66 |
| ATP | 6011 | RecName<br>:<br>Full=Clat<br>hrin<br>heavy<br>chain 1 | gi 1705915,<br>gi 2780668<br>9,gi 565545<br>48,gi 56554<br>549,gi 5655<br>4550,gi 565<br>54551,gi 56<br>554552,gi 5<br>6554553,gi <br>56554554,g<br>i 56554555,<br>gi 5655455<br>6 | 186,919.60 | 100.00% | 9 | 9 | 9 | 0.10% | 9.20% | RPISADS<br>AIMNPA<br>SK         | 3.71 | 1,573.80 |
| ATP | 6011 | RecName<br>:<br>Full=Clat<br>hrin<br>heavy<br>chain 1 | gi 1705915,<br>gi 2780668<br>9,gi 565545<br>48,gi 56554<br>549,gi 5655<br>4550,gi 565<br>54551,gi 56<br>554552,gi 5<br>6554553,gi <br>56554554,g<br>i 56554555,<br>gi 5655455<br>6 | 186,919.60 | 100.00% | 9 | 9 | 9 | 0.10% | 9.20% | TLQIFNI<br>EMK                  | 2.86 | 1,252.66 |
| ATP | 6011 | RecName<br>:<br>Full=Clat<br>hrin<br>heavy<br>chain 1 | gi 1705915,<br>gi 2780668<br>9,gi 565545<br>48,gi 56554<br>549,gi 5655<br>4550,gi 565<br>54551,gi 56<br>554552,gi 5<br>6554553,gi <br>56554554,g<br>i 56554555,<br>gi 5655455<br>6 | 186,919.60 | 100.00% | 9 | 9 | 9 | 0.10% | 9.20% | TSIDAYD<br>NFDNISL<br>AQR       | 2.64 | 1,942.91 |

|     |      |                                                                  |                                                     |           |         |   |   |    |       |        |                                 |          |
|-----|------|------------------------------------------------------------------|-----------------------------------------------------|-----------|---------|---|---|----|-------|--------|---------------------------------|----------|
| ATP | 6011 | hydroxysteroid (17-beta) dehydrogenase 11                        | gi 114052807.gi 86438493                            | 35,077.20 | 99.80%  | 2 | 4 | 4  | 0.04% | 11.40% | NPSTSLG 4.86<br>PTLEPEE<br>VVNK | 1,910.97 |
| ATP | 6011 | hydroxysteroid (17-beta) dehydrogenase 11                        | gi 114052807.gi 86438493                            | 35,077.20 | 99.80%  | 2 | 4 | 4  | 0.04% | 11.40% | SVTGEIV 4.45<br>LITGAG<br>HGIGR | 1,736.97 |
| ATP | 6011 | pre-B-cell leukemia transcript ion factor interactin g protein 1 | gi 110331795.gi 115497324.gi 151554897.gi 158706093 | 80,239.50 | 99.80%  | 2 | 2 | 2  | 0.02% | 3.71%  | ALESEL 3.01<br>QQLR             | 1,186.64 |
| ATP | 6011 | pre-B-cell leukemia transcript ion factor interactin g protein 1 | gi 110331795.gi 115497324.gi 151554897.gi 158706093 | 80,239.50 | 99.80%  | 2 | 2 | 2  | 0.02% | 3.71%  | EQGPTG 3.96<br>QEPPSPGF<br>LEQK | 1,828.87 |
| ATP | 6011 | Ribosomal protein S3                                             | gi 74268226.gi 77404290.gi 91207641                 | 26,670.50 | 99.80%  | 2 | 2 | 2  | 0.02% | 10.30% | AELNEFL 2.63<br>TR              | 1,092.57 |
| ATP | 6011 | Ribosomal protein S3                                             | gi 74268226.gi 77404290.gi 91207641                 | 26,670.50 | 99.80%  | 2 | 2 | 2  | 0.02% | 10.30% | GGKPEP 3.26<br>PAMPQP<br>VPTA   | 1,589.80 |
| ATP | 6011 | Leucine zipper-EF hand containin g transmembrane protein 1       | gi 111308604.gi 115497920                           | 81,801.70 | 100.00% | 7 | 8 | 10 | 0.11% | 13.50% | ADDKLI 4.29<br>AEEGVD<br>SLNVK  | 1,815.93 |
| ATP | 6011 | Leucine zipper-EF hand containin g transmembrane protein 1       | gi 111308604.gi 115497920                           | 81,801.70 | 100.00% | 7 | 8 | 10 | 0.11% | 13.50% | AMYLPE 2.8<br>TLSPAD<br>QLK     | 1,692.85 |
| ATP | 6011 | Leucine zipper-EF hand containin g transmembrane protein 1       | gi 111308604.gi 115497920                           | 81,801.70 | 100.00% | 7 | 8 | 10 | 0.11% | 13.50% | DFSVFFQ 2.32<br>K               | 1,017.50 |
| ATP | 6011 | Leucine zipper-EF hand containin g transmembrane protein 1       | gi 111308604.gi 115497920                           | 81,801.70 | 100.00% | 7 | 8 | 10 | 0.11% | 13.50% | FLQDTIE 4.4<br>EMALK            | 1,453.72 |

|     |      |                                                            |                        |           |         |    |    |    |       |        |                                          |          |
|-----|------|------------------------------------------------------------|------------------------|-----------|---------|----|----|----|-------|--------|------------------------------------------|----------|
| ATP | 6011 | Leucine zipper-EF-hand containin g transmembrane protein 1 | gi 1113086             | 81,801.70 | 100.00% | 7  | 8  | 10 | 0.11% | 13.50% | IRETGER 2.62<br>PSNEEIM<br>R             | 1,832.89 |
| ATP | 6011 | Leucine zipper-EF-hand containin g transmembrane protein 1 | gi 1113086             | 81,801.70 | 100.00% | 7  | 8  | 10 | 0.11% | 13.50% | KLEEGG 3.69<br>PVYSPP<br>AQAAVR          | 1,868.99 |
| ATP | 6011 | Leucine zipper-EF-hand containin g transmembrane protein 1 | gi 1113086             | 81,801.70 | 100.00% | 7  | 8  | 10 | 0.11% | 13.50% | LLELQSI 4.41<br>GTNNFL<br>R              | 1,617.90 |
| ATP | 6011 | voltage-dependen t anion channel 1                         | gi 8810220, gi 9011186 | 30,723.80 | 100.00% | 10 | 12 | 41 | 0.45% | 41.30% | GYGFGLI 2.08<br>K                        | 854.4772 |
| ATP | 6011 | voltage-dependen t anion channel 1                         | gi 8810220, gi 9011186 | 30,723.80 | 100.00% | 10 | 12 | 41 | 0.45% | 41.30% | LTFDSSF 3.46<br>SPNTGK<br>K              | 1,528.76 |
| ATP | 6011 | voltage-dependen t anion channel 1                         | gi 8810220, gi 9011186 | 30,723.80 | 100.00% | 10 | 12 | 41 | 0.45% | 41.30% | LTLSALL 3.27<br>DGK                      | 1,030.61 |
| ATP | 6011 | voltage-dependen t anion channel 1                         | gi 8810220, gi 9011186 | 30,723.80 | 100.00% | 10 | 12 | 41 | 0.45% | 41.30% | LTLSALL 2.74<br>DGKNVN<br>AGGHK          | 1,808.00 |
| ATP | 6011 | voltage-dependen t anion channel 1                         | gi 8810220, gi 9011186 | 30,723.80 | 100.00% | 10 | 12 | 41 | 0.45% | 41.30% | SENGLEF 4.49<br>TSSGSA<br>NTETTK         | 1,959.88 |
| ATP | 6011 | voltage-dependen t anion channel 1                         | gi 8810220, gi 9011186 | 30,723.80 | 100.00% | 10 | 12 | 41 | 0.45% | 41.30% | SRVTQS 3.15<br>NFAVGY<br>K               | 1,456.75 |
| ATP | 6011 | voltage-dependen t anion channel 1                         | gi 8810220, gi 9011186 | 30,723.80 | 100.00% | 10 | 12 | 41 | 0.45% | 41.30% | TDEFQL 6.02<br>HTNVND<br>GTEFGG<br>SIYQK | 2,600.19 |
| ATP | 6011 | voltage-dependen t anion channel 1                         | gi 8810220, gi 9011186 | 30,723.80 | 100.00% | 10 | 12 | 41 | 0.45% | 41.30% | TKSENG 5.07<br>LEFTSSG<br>SANTET<br>TK   | 2,189.02 |
| ATP | 6011 | voltage-dependen t anion channel 1                         | gi 8810220, gi 9011186 | 30,723.80 | 100.00% | 10 | 12 | 41 | 0.45% | 41.30% | VNSSLI 4.74<br>GLGYTQ<br>TLKPGIK         | 2,103.18 |
| ATP | 6011 | voltage-dependen t anion channel 1                         | gi 8810220, gi 9011186 | 30,723.80 | 100.00% | 10 | 12 | 41 | 0.45% | 41.30% | VTQSNF 4.18<br>AVGYK                     | 1,213.62 |

|     |      |                                                      |                                                                       |            |         |   |   |    |       |        |                               |      |          |
|-----|------|------------------------------------------------------|-----------------------------------------------------------------------|------------|---------|---|---|----|-------|--------|-------------------------------|------|----------|
| ATP | 6011 | voltage-dependent anion channel 2                    | gi 59858401,gi 62177148,gi 73586695,gi 8574295,gi 8810222,gi 90111864 | 31,602.50  | 100.00% | 5 | 6 | 16 | 0.17% | 26.90% | LTFDITF SPNTGK K              | 3.01 | 1,556.80 |
| ATP | 6011 | voltage-dependent anion channel 2                    | gi 59858401,gi 62177148,gi 73586695,gi 8574295,gi 8810222,gi 90111864 | 31,602.50  | 100.00% | 5 | 6 | 16 | 0.17% | 26.90% | LTLALSAL VDGK                 | 3.54 | 1,016.60 |
| ATP | 6011 | voltage-dependent anion channel 2                    | gi 59858401,gi 62177148,gi 73586695,gi 8574295,gi 8810222,gi 90111864 | 31,602.50  | 100.00% | 5 | 6 | 16 | 0.17% | 26.90% | TGDFQL HTNVND GTEFGG SIYQK    | 4.59 | 2,528.17 |
| ATP | 6011 | voltage-dependent anion channel 2                    | gi 59858401,gi 62177148,gi 73586695,gi 8574295,gi 8810222,gi 90111864 | 31,602.50  | 100.00% | 5 | 6 | 16 | 0.17% | 26.90% | VNSSLI GVGYTQ TLRPGV K        | 5.17 | 2,103.16 |
| ATP | 6011 | voltage-dependent anion channel 2                    | gi 59858401,gi 62177148,gi 73586695,gi 8574295,gi 8810222,gi 90111864 | 31,602.50  | 100.00% | 5 | 6 | 16 | 0.17% | 26.90% | YQLDPT ASISAK                 | 3.28 | 1,293.67 |
| ATP | 6011 | Trx-like protein                                     | gi 109726696,gi 115494922,gi 122145628,gi 126920889,gi 146231808      | 31,563.90  | 99.80%  | 2 | 2 | 2  | 0.02% | 8.27%  | LLPESQ PLKK                   | 2.47 | 1,239.73 |
| ATP | 6011 | Trx-like protein                                     | gi 109726696,gi 115494922,gi 122145628,gi 126920889,gi 146231808      | 31,563.90  | 99.80%  | 2 | 2 | 2  | 0.02% | 8.27%  | VDVTEQ PGLSGR                 | 4.31 | 1,257.64 |
| ATP | 6011 | endothelial cell-specific molecule 2                 | gi 114053335,gi 86438024                                              | 20,621.00  | 99.80%  | 2 | 3 | 4  | 0.04% | 13.20% | ESEDPO KPGSSG LSESGT ANGEK    | 4.05 | 2,378.06 |
| ATP | 6011 | endothelial cell-specific molecule 2                 | gi 114053335,gi 86438024                                              | 20,621.00  | 99.80%  | 2 | 3 | 4  | 0.04% | 13.20% | NKESD POKPGS SGLSESG STANGE K | 3.01 | 2,620.20 |
| ATP | 6011 | PREDICTED: similar to leucyl/cystinyl aminopeptidase | gi 119895933                                                          | 119,380.70 | 100.00% | 4 | 5 | 6  | 0.07% | 4.68%  | DEQYTA LSNMPK                 | 2.98 | 1,412.64 |

|     |      |                                                                                     |                                                                                           |            |         |   |   |   |       |        |                                                                   |      |          |
|-----|------|-------------------------------------------------------------------------------------|-------------------------------------------------------------------------------------------|------------|---------|---|---|---|-------|--------|-------------------------------------------------------------------|------|----------|
| ATP | 6011 | PREDIC TED: 33<br>similar to leucyl/cystinyl aminopeptidase                         | gi 1198959                                                                                | 119,380.70 | 100.00% | 4 | 5 | 6 | 0.07% | 4.68%  | GLGEHE<br>LDEDEE<br>DYESSA<br>K                                   | 5.15 | 2,151.88 |
| ATP | 6011 | PREDIC TED: 33<br>similar to leucyl/cystinyl aminopeptidase                         | gi 1198959                                                                                | 119,380.70 | 100.00% | 4 | 5 | 6 | 0.07% | 4.68%  | IFGELSS<br>YEDFLD<br>AR                                           | 3.75 | 1,761.83 |
| ATP | 6011 | PREDIC TED: 33<br>similar to leucyl/cystinyl aminopeptidase                         | gi 1198959                                                                                | 119,380.70 | 100.00% | 4 | 5 | 6 | 0.07% | 4.68%  | IKRDEQ<br>YTALSN<br>MPK                                           | 4.23 | 1,809.92 |
| ATP | 6011 | PREDIC TED: 9<br>similar to Zinc finger protein basonuclin-1                        | gi 7664705                                                                                | 111,795.20 | 99.70%  | 2 | 2 | 2 | 0.02% | 2.48%  | IEKETME<br>TADEKR                                                 | 2.66 | 1,595.76 |
| ATP | 6011 | PREDIC TED: 9<br>similar to Zinc finger protein basonuclin-1                        | gi 7664705                                                                                | 111,795.20 | 99.70%  | 2 | 2 | 2 | 0.02% | 2.48%  | VEPCVP<br>FPDYIK                                                  | 2.22 | 1,406.70 |
| ATP | 6011 | Chain B, Crystal Structure Of Bovine Heart Mitochondrial Bcl-2 With Jg144 Inhibitor | gi 114793902,gi 27807143,gi 300,gi 401248,gi 59858351,gi 73586962,gi 82407277,gi 82407288 | 46,506.00  | 100.00% | 6 | 6 | 6 | 0.07% | 25.50% | EQNGDS<br>LVHAAL<br>VAESAAI<br>GSAEAN<br>AFSVLQ<br>HVLGAG<br>PHVK | 2.94 | 4,065.08 |
| ATP | 6011 | Chain B, Crystal Structure Of Bovine Heart Mitochondrial Bcl-2 With Jg144 Inhibitor | gi 114793902,gi 27807143,gi 300,gi 401248,gi 59858351,gi 73586962,gi 82407277,gi 82407288 | 46,506.00  | 100.00% | 6 | 6 | 6 | 0.07% | 25.50% | GSNATS<br>SLYQAV<br>AK                                            | 2.72 | 1,396.71 |

|     |      |                                                                                   |                                                                                           |           |         |   |   |   |       |        |                           |      |          |
|-----|------|-----------------------------------------------------------------------------------|-------------------------------------------------------------------------------------------|-----------|---------|---|---|---|-------|--------|---------------------------|------|----------|
| ATP | 6011 | Chain B, Crystal Structure Of Bovine Heart Mitochondrial Bcl With Jg144 Inhibitor | gi 114793902,gi 27807143,gi 300,gi 401248,gi 59858351,gi 73586962,gi 82407277,gi 82407288 | 46,506.00 | 100.00% | 6 | 6 | 6 | 0.07% | 25.50% | MALIGL<br>GVSHPV<br>LK    | 3.08 | 1,450.85 |
| ATP | 6011 | Chain B, Crystal Structure Of Bovine Heart Mitochondrial Bcl With Jg144 Inhibitor | gi 114793902,gi 27807143,gi 300,gi 401248,gi 59858351,gi 73586962,gi 82407277,gi 82407288 | 46,506.00 | 100.00% | 6 | 6 | 6 | 0.07% | 25.50% | QVAEQF<br>LNIR            | 2.57 | 1,217.66 |
| ATP | 6011 | Chain B, Crystal Structure Of Bovine Heart Mitochondrial Bcl With Jg144 Inhibitor | gi 114793902,gi 27807143,gi 300,gi 401248,gi 59858351,gi 73586962,gi 82407277,gi 82407288 | 46,506.00 | 100.00% | 6 | 6 | 6 | 0.07% | 25.50% | SMAASG<br>NLGHTP<br>FIDEL | 2.36 | 1,775.83 |
| ATP | 6011 | Chain B, Crystal Structure Of Bovine Heart Mitochondrial Bcl With Jg144 Inhibitor | gi 114793902,gi 27807143,gi 300,gi 401248,gi 59858351,gi 73586962,gi 82407277,gi 82407288 | 46,506.00 | 100.00% | 6 | 6 | 6 | 0.07% | 25.50% | TIAQGN<br>LSNPDV<br>QAAK  | 3.92 | 1,626.84 |
| ATP | 6011 | Chain A, Crystal Structure Of Bovine Heart Mitochondrial Bcl With Jg144 Inhibitor | gi 114793901,gi 71042575,gi 71042585,gi 7565179,gi 75765190,gi 82407287                   | 49,194.40 | 100.00% | 4 | 4 | 4 | 0.04% | 14.80% | DVILQEL<br>QENDTS<br>MR   | 2.78 | 1,806.85 |

|     |      |                                                                                   |                                                                         |           |         |   |   |   |       |        |                                      |      |          |
|-----|------|-----------------------------------------------------------------------------------|-------------------------------------------------------------------------|-----------|---------|---|---|---|-------|--------|--------------------------------------|------|----------|
| ATP | 6011 | Chain A, Crystal Structure Of Bovine Heart Mitochondrial Bcl With Jg144 Inhibitor | gi 114793901,gi 71042575,gi 71042585,gi 7565179,gi 75765190,gi 82407287 | 49,194.40 | 100.00% | 4 | 4 | 4 | 0.04% | 14.80% | EVESMG<br>AHLNAY<br>STR              | 2.73 | 1,680.76 |
| ATP | 6011 | Chain A, Crystal Structure Of Bovine Heart Mitochondrial Bcl With Jg144 Inhibitor | gi 114793901,gi 71042575,gi 71042585,gi 7565179,gi 75765190,gi 82407287 | 49,194.40 | 100.00% | 4 | 4 | 4 | 0.04% | 14.80% | MVLAAA<br>GGLEHR                     | 3.52 | 1,240.65 |
| ATP | 6011 | Chain A, Crystal Structure Of Bovine Heart Mitochondrial Bcl With Jg144 Inhibitor | gi 114793901,gi 71042575,gi 71042585,gi 7565179,gi 75765190,gi 82407287 | 49,194.40 | 100.00% | 4 | 4 | 4 | 0.04% | 14.80% | TATYAQ<br>ALQSVP<br>ETQVSQ<br>LDNGLR | 3.49 | 2,590.31 |
| ATP | 6011 | NADH dehydrogenase (ubiquinone) Fe-S protein 1, 75kDa (NADH-coenzyme Q reductase) | gi 111308529,gi 128825,gi 163414,gi 2780735                             | 79,425.10 | 100.00% | 3 | 3 | 3 | 0.03% | 6.19%  | ILQDIAS<br>GSHFES<br>QVLQEA<br>K     | 3.77 | 2,168.13 |
| ATP | 6011 | NADH dehydrogenase (ubiquinone) Fe-S protein 1, 75kDa (NADH-coenzyme Q reductase) | gi 111308529,gi 128825,gi 163414,gi 2780735                             | 79,425.10 | 100.00% | 3 | 3 | 3 | 0.03% | 6.19%  | NRLEEV<br>SPNLVR                     | 2.83 | 1,425.78 |



|     |      |                                                                                   |                                                    |           |         |   |    |    |       |        |                                       |          |
|-----|------|-----------------------------------------------------------------------------------|----------------------------------------------------|-----------|---------|---|----|----|-------|--------|---------------------------------------|----------|
| ATP | 6011 | NADH dehydrogenase (ubiquinone) Fe-S protein 1, 75kDa (NADH-coenzyme Q reductase) | gi 111308529,gi 128825,gi 163414,gi 27807355       | 79,425.10 | 100.00% | 3 | 3  | 3  | 0.03% | 6.19%  | VALIGSP 3.22<br>VDLTYR                | 1,403.79 |
| ATP | 6011 | Flotillin 1                                                                       | gi 115305033,gi 116004001,gi 118572320,gi 75775078 | 47,334.80 | 100.00% | 9 | 12 | 15 | 0.16% | 30.40% | AQQVAV 3.84<br>QEQEIAR                | 1,469.77 |
| ATP | 6011 | Flotillin 1                                                                       | gi 115305033,gi 116004001,gi 118572320,gi 75775078 | 47,334.80 | 100.00% | 9 | 12 | 15 | 0.16% | 30.40% | DIHDDQ 2.87<br>DYLHSL<br>GK           | 1,655.77 |
| ATP | 6011 | Flotillin 1                                                                       | gi 115305033,gi 116004001,gi 118572320,gi 75775078 | 47,334.80 | 100.00% | 9 | 12 | 15 | 0.16% | 30.40% | ISLNTLT 2.93<br>LNVK                  | 1,215.73 |
| ATP | 6011 | Flotillin 1                                                                       | gi 115305033,gi 116004001,gi 118572320,gi 75775078 | 47,334.80 | 100.00% | 9 | 12 | 15 | 0.16% | 30.40% | ITLVSSG 4.42<br>SGAMGA<br>AK          | 1,365.70 |
| ATP | 6011 | Flotillin 1                                                                       | gi 115305033,gi 116004001,gi 118572320,gi 75775078 | 47,334.80 | 100.00% | 9 | 12 | 15 | 0.16% | 30.40% | KAEAFQ 4.44<br>LYQEAA<br>QLDMLL<br>EK | 2,355.19 |
| ATP | 6011 | Flotillin 1                                                                       | gi 115305033,gi 116004001,gi 118572320,gi 75775078 | 47,334.80 | 100.00% | 9 | 12 | 15 | 0.16% | 30.40% | SQLIMQ 4.55<br>AEAEAE<br>AVR          | 1,661.82 |
| ATP | 6011 | Flotillin 1                                                                       | gi 115305033,gi 116004001,gi 118572320,gi 75775078 | 47,334.80 | 100.00% | 9 | 12 | 15 | 0.16% | 30.40% | TEAEIAH 5.29<br>IALETLE<br>GHQR       | 2,018.03 |
| ATP | 6011 | Flotillin 1                                                                       | gi 115305033,gi 116004001,gi 118572320,gi 75775078 | 47,334.80 | 100.00% | 9 | 12 | 15 | 0.16% | 30.40% | VSAQYL 3.72<br>SEIEMA<br>K            | 1,484.73 |
| ATP | 6011 | Flotillin 1                                                                       | gi 115305033,gi 116004001,gi 118572320,gi 75775078 | 47,334.80 | 100.00% | 9 | 12 | 15 | 0.16% | 30.40% | VTGEVL 3.04<br>DILSR                  | 1,201.68 |

|     |      |                                                                                                  |                                                                           |            |         |   |   |   |       |        |                    |      |          |
|-----|------|--------------------------------------------------------------------------------------------------|---------------------------------------------------------------------------|------------|---------|---|---|---|-------|--------|--------------------|------|----------|
| ATP | 6011 | PREDIC TED: similar to ribosomal protein S24                                                     | gi 119914811.gi 194677142.gi 58760477.gi 70778760.gi 74268388.gi 91207637 | 15,283.40  | 99.80%  | 2 | 2 | 2 | 0.02% | 20.50% | KQMVID VLHPGK      | 3.41 | 1,380.77 |
| ATP | 6011 | PREDIC TED: similar to ribosomal protein S24                                                     | gi 119914811.gi 194677142.gi 58760477.gi 70778760.gi 74268388.gi 91207637 | 15,283.40  | 99.80%  | 2 | 2 | 2 | 0.02% | 20.50% | TTGFGM IYDSL DY AK | 3.66 | 1,697.77 |
| ATP | 6011 | similar to 40S ribosomal protein S18                                                             | gi 28189422.gi 28189549.gi 28189799.gi 74268023.gi 75812924.gi 91207636   | 15,380.70  | 100.00% | 3 | 3 | 4 | 0.04% | 25.20% | IAFAITAI K         | 2.28 | 947.5925 |
| ATP | 6011 | similar to 40S ribosomal protein S18                                                             | gi 28189422.gi 28189549.gi 28189799.gi 74268023.gi 75812924.gi 91207636   | 15,380.70  | 100.00% | 3 | 3 | 4 | 0.04% | 25.20% | RAGELT EDEVER      | 4.51 | 1,403.68 |
| ATP | 6011 | similar to 40S ribosomal protein S18                                                             | gi 28189422.gi 28189549.gi 28189799.gi 74268023.gi 75812924.gi 91207636   | 15,380.70  | 100.00% | 3 | 3 | 4 | 0.04% | 25.20% | YSQVLA NGLDNK      | 3.78 | 1,321.67 |
| ATP | 6011 | glutathione peroxidase 8                                                                         | gi 114052907.gi 122143886.gi 84708688                                     | 23,965.80  | 99.80%  | 2 | 3 | 3 | 0.03% | 11.00% | ILGSEAE PAFR       | 3.62 | 1,189.62 |
| ATP | 6011 | glutathione peroxidase 8                                                                         | gi 114052907.gi 122143886.gi 84708688                                     | 23,965.80  | 99.80%  | 2 | 3 | 3 | 0.03% | 11.00% | NNFGVT FPIPHK      | 2.73 | 1,420.74 |
| ATP | 6011 | PREDIC TED: similar to Neuroblast differentiation-associated protein AHNAK (Desmoyokin), partial | gi 194687805                                                              | 140,614.00 | 99.80%  | 2 | 2 | 2 | 0.02% | 2.31%  | ISMPDV DLNLKG PK   | 2.99 | 1,542.82 |

|     |      |                                                                                                    |                                       |            |         |   |   |    |       |        |                                                                  |      |          |
|-----|------|----------------------------------------------------------------------------------------------------|---------------------------------------|------------|---------|---|---|----|-------|--------|------------------------------------------------------------------|------|----------|
| ATP | 6011 | PREDICTED:<br>similar to Neuroblast differentiation-associated protein AHNAK (Desmoyokin), partial | gi 194687805                          | 140,614.00 | 99.80%  | 2 | 2 | 2  | 0.02% | 2.31%  | VDIEAPD<br>VSLEGPE<br>GK                                         | 3.17 | 1,654.82 |
| ATP | 6011 | dolichyldiphosphooligosaccharide-proteinglycosyltransferase                                        | gi 110665590,gi 151555878,gi 15275740 | 48,774.90  | 100.00% | 6 | 8 | 13 | 0.14% | 25.50% | GVGMV<br>ADPDNP<br>LVLDILT<br>GSSTSYS<br>FFPKPI<br>TQYPHA<br>VGK | 4.57 | 4,350.16 |
| ATP | 6011 | dolichyldiphosphooligosaccharide-proteinglycosyltransferase                                        | gi 110665590,gi 151555878,gi 15275740 | 48,774.90  | 100.00% | 6 | 8 | 13 | 0.14% | 25.50% | LPDVYV<br>VFQFK                                                  | 3.56 | 1,312.69 |
| ATP | 6011 | dolichyldiphosphooligosaccharide-proteinglycosyltransferase                                        | gi 110665590,gi 151555878,gi 15275740 | 48,774.90  | 100.00% | 6 | 8 | 13 | 0.14% | 25.50% | SSLNPIL<br>FR                                                    | 2.44 | 1,046.60 |
| ATP | 6011 | dolichyldiphosphooligosaccharide-proteinglycosyltransferase                                        | gi 110665590,gi 151555878,gi 15275740 | 48,774.90  | 100.00% | 6 | 8 | 13 | 0.14% | 25.50% | TADDPS<br>LSLIK                                                  | 3.14 | 1,159.62 |
| ATP | 6011 | dolichyldiphosphooligosaccharide-proteinglycosyltransferase                                        | gi 110665590,gi 151555878,gi 15275740 | 48,774.90  | 100.00% | 6 | 8 | 13 | 0.14% | 25.50% | TAVIDH<br>HNYDVS<br>DLGQHT<br>LIVADTE<br>NLLK                    | 6.12 | 3,231.63 |
| ATP | 6011 | dolichyldiphosphooligosaccharide-proteinglycosyltransferase                                        | gi 110665590,gi 151555878,gi 15275740 | 48,774.90  | 100.00% | 6 | 8 | 13 | 0.14% | 25.50% | TLVLLD<br>NLNLR                                                  | 3.45 | 1,283.77 |
| ATP | 6011 | reticulon 4 isoform 2                                                                              | gi 164259354,gi 92096636              | 40,940.20  | 99.80%  | 2 | 2 | 3  | 0.03% | 7.12%  | GPLPAA<br>PLAAPE<br>R                                            | 2.78 | 1,259.71 |
| ATP | 6011 | reticulon 4 isoform 2                                                                              | gi 164259354,gi 92096636              | 40,940.20  | 99.80%  | 2 | 2 | 3  | 0.03% | 7.12%  | HQAQID<br>HYLGLA<br>NK                                           | 4.33 | 1,607.83 |
| ATP | 6011 | ATL3 protein                                                                                       | gi 148745456,gi 154707918             | 60,294.70  | 100.00% | 4 | 6 | 6  | 0.07% | 12.90% | ALASILL<br>QDHIR                                                 | 3.27 | 1,349.79 |
| ATP | 6011 | ATL3 protein                                                                                       | gi 148745456,gi 154707918             | 60,294.70  | 100.00% | 4 | 6 | 6  | 0.07% | 12.90% | IYQGED<br>LPHPK                                                  | 3.13 | 1,296.66 |

|     |      |                                                                                                    |                                            |           |         |   |    |    |       |        |                                                   |          |
|-----|------|----------------------------------------------------------------------------------------------------|--------------------------------------------|-----------|---------|---|----|----|-------|--------|---------------------------------------------------|----------|
| ATP | 6011 | ATL3<br>protein                                                                                    | gi 1487454<br>56,gi 15470<br>7918          | 60,294.70 | 100.00% | 4 | 6  | 6  | 0.07% | 12.90% | LKDIASE 2.79<br>FKEQLQ<br>TLILHVL<br>NPANLM<br>EK | 3,251.77 |
| ATP | 6011 | ATL3<br>protein                                                                                    | gi 1487454<br>56,gi 15470<br>7918          | 60,294.70 | 100.00% | 4 | 6  | 6  | 0.07% | 12.90% | SMLQAT 4.29<br>AEANNL<br>AAAASA<br>K              | 1,848.91 |
| ATP | 6011 | RecName<br>:<br>Full=Glut<br>athione S-<br>transferas<br>e P;<br>AltName:<br>Full=GS<br>T class-pi | gi 121744,g<br>i 29135329,<br>gi 404,gi 74 | 23,595.90 | 99.80%  | 2 | 3  | 3  | 0.03% | 15.70% | ALPQHL 2.37<br>KPFETLL<br>SQNK                    | 1,964.10 |
| ATP | 6011 | RecName<br>:<br>Full=Glut<br>athione S-<br>transferas<br>e P;<br>AltName:<br>Full=GS<br>T class-pi | gi 121744,g<br>i 29135329,<br>gi 404,gi 74 | 23,595.90 | 99.80%  | 2 | 3  | 3  | 0.03% | 15.70% | FQDGDL 5.07<br>TLYQSN<br>AILR                     | 1,853.94 |
| ATP | 6011 | Polioviru<br>s receptor-<br>related 2<br>(herpesvi<br>rus entry<br>mediator<br>B)                  | gi 1096583<br>9,gi 11549<br>7936           | 43,243.10 | 100.00% | 3 | 3  | 3  | 0.03% | 13.60% | ETQGSQ 4.39<br>PLPGTV<br>TVTSR                    | 1,686.87 |
| ATP | 6011 | Polioviru<br>s receptor-<br>related 2<br>(herpesvi<br>rus entry<br>mediator<br>B)                  | gi 1096583<br>9,gi 11549<br>7936           | 43,243.10 | 100.00% | 3 | 3  | 3  | 0.03% | 13.60% | VIAQPQ 2.51<br>NHAEKQ<br>EVTFNL<br>DPVPVA<br>R    | 2,800.47 |
| ATP | 6011 | Polioviru<br>s receptor-<br>related 2<br>(herpesvi<br>rus entry<br>mediator<br>B)                  | gi 1096583<br>9,gi 11549<br>7936           | 43,243.10 | 100.00% | 3 | 3  | 3  | 0.03% | 13.60% | YTVTPL 3.08<br>SEADGV<br>K                        | 1,379.71 |
| ATP | 6011 | Lamin<br>A/C                                                                                       | gi 7435471<br>9,gi 774041<br>82            | 65,105.20 | 100.00% | 9 | 10 | 10 | 0.11% | 19.90% | IRIDSLS 3.31<br>AQLSQL<br>QK                      | 1,699.97 |
| ATP | 6011 | Lamin<br>A/C                                                                                       | gi 7435471<br>9,gi 774041<br>82            | 65,105.20 | 100.00% | 9 | 10 | 10 | 0.11% | 19.90% | LADALQ 2.96<br>ELR                                | 1,028.57 |
| ATP | 6011 | Lamin<br>A/C                                                                                       | gi 7435471<br>9,gi 774041<br>82            | 65,105.20 | 100.00% | 9 | 10 | 10 | 0.11% | 19.90% | LKDLEA 3.49<br>LLNSK                              | 1,243.73 |
| ATP | 6011 | Lamin<br>A/C                                                                                       | gi 7435471<br>9,gi 774041<br>82            | 65,105.20 | 100.00% | 9 | 10 | 10 | 0.11% | 19.90% | LQEKED 4.57<br>LQELND<br>R                        | 1,629.81 |
| ATP | 6011 | Lamin<br>A/C                                                                                       | gi 7435471<br>9,gi 774041<br>82            | 65,105.20 | 100.00% | 9 | 10 | 10 | 0.11% | 19.90% | LQTLKE 2.85<br>ELDFQK                             | 1,491.81 |

|     |      |                                                                                                     |                                                   |           |         |    |    |    |       |        |                                            |      |          |
|-----|------|-----------------------------------------------------------------------------------------------------|---------------------------------------------------|-----------|---------|----|----|----|-------|--------|--------------------------------------------|------|----------|
| ATP | 6011 | Lamin A/C                                                                                           | gi 7435471<br>9,gi 774041<br>82                   | 65,105.20 | 100.00% | 9  | 10 | 10 | 0.11% | 19.90% | LRDLED<br>SLAR                             | 2.8  | 1,187.64 |
| ATP | 6011 | Lamin A/C                                                                                           | gi 7435471<br>9,gi 774041<br>82                   | 65,105.20 | 100.00% | 9  | 10 | 10 | 0.11% | 19.90% | MQQQLD<br>EYQELL<br>DIK                    | 3.45 | 1,909.92 |
| ATP | 6011 | Lamin A/C                                                                                           | gi 7435471<br>9,gi 774041<br>82                   | 65,105.20 | 100.00% | 9  | 10 | 10 | 0.11% | 19.90% | QNGDDP<br>LLTYRFP<br>PK                    | 2.56 | 1,760.90 |
| ATP | 6011 | Lamin A/C                                                                                           | gi 7435471<br>9,gi 774041<br>82                   | 65,105.20 | 100.00% | 9  | 10 | 10 | 0.11% | 19.90% | TALINST<br>GEEVAM<br>R                     | 2.8  | 1,507.74 |
| ATP | 6011 | serpin peptidase inhibitor, clade H (heat shock protein 47), member 1, (collagen binding protein 1) | gi 1140515<br>05,gi 11625<br>6076,gi 868<br>21084 | 46,490.00 | 100.00% | 12 | 15 | 26 | 0.28% | 36.80% | AVAISLP<br>K                               | 2.39 | 798.5084 |
| ATP | 6011 | serpin peptidase inhibitor, clade H (heat shock protein 47), member 1, (collagen binding protein 1) | gi 1140515<br>05,gi 11625<br>6076,gi 868<br>21084 | 46,490.00 | 100.00% | 12 | 15 | 26 | 0.28% | 36.80% | AVLSAE<br>QLRDDE<br>VHAGLG<br>ELLR         | 4.56 | 2,391.26 |
| ATP | 6011 | serpin peptidase inhibitor, clade H (heat shock protein 47), member 1, (collagen binding protein 1) | gi 1140515<br>05,gi 11625<br>6076,gi 868<br>21084 | 46,490.00 | 100.00% | 12 | 15 | 26 | 0.28% | 36.80% | DQAVEN<br>ILLSPVV<br>VASSLG<br>LVSLGG<br>K | 5.29 | 2,565.45 |

|     |      |                                                                                                                                         |                                                   |           |         |    |    |    |       |        |                         |      |          |
|-----|------|-----------------------------------------------------------------------------------------------------------------------------------------|---------------------------------------------------|-----------|---------|----|----|----|-------|--------|-------------------------|------|----------|
| ATP | 6011 | serpin<br>peptidase<br>inhibitor,<br>clade H<br>(heat<br>shock<br>protein<br>47),<br>member<br>1,<br>(collagen<br>binding<br>protein 1) | gi 1140515<br>05,gi 11625<br>6076,gi 868<br>21084 | 46,490.00 | 100.00% | 12 | 15 | 26 | 0.28% | 36.80% | DTQSGS<br>LLFIGR        | 2.83 | 1,293.68 |
| ATP | 6011 | serpin<br>peptidase<br>inhibitor,<br>clade H<br>(heat<br>shock<br>protein<br>47),<br>member<br>1,<br>(collagen<br>binding<br>protein 1) | gi 1140515<br>05,gi 11625<br>6076,gi 868<br>21084 | 46,490.00 | 100.00% | 12 | 15 | 26 | 0.28% | 36.80% | GVVEVT<br>HDLQK         | 4    | 1,224.66 |
| ATP | 6011 | serpin<br>peptidase<br>inhibitor,<br>clade H<br>(heat<br>shock<br>protein<br>47),<br>member<br>1,<br>(collagen<br>binding<br>protein 1) | gi 1140515<br>05,gi 11625<br>6076,gi 868<br>21084 | 46,490.00 | 100.00% | 12 | 15 | 26 | 0.28% | 36.80% | HLAGLG<br>LTEAIDK       | 3.15 | 1,337.74 |
| ATP | 6011 | serpin<br>peptidase<br>inhibitor,<br>clade H<br>(heat<br>shock<br>protein<br>47),<br>member<br>1,<br>(collagen<br>binding<br>protein 1) | gi 1140515<br>05,gi 11625<br>6076,gi 868<br>21084 | 46,490.00 | 100.00% | 12 | 15 | 26 | 0.28% | 36.80% | HLAGLG<br>LTEAIDK<br>NK | 5.84 | 1,579.88 |

|     |      |                                                                                                                                         |                                                   |           |         |    |    |    |       |        |                                |          |
|-----|------|-----------------------------------------------------------------------------------------------------------------------------------------|---------------------------------------------------|-----------|---------|----|----|----|-------|--------|--------------------------------|----------|
| ATP | 6011 | serpin<br>peptidase<br>inhibitor,<br>clade H<br>(heat<br>shock<br>protein<br>47),<br>member<br>1,<br>(collagen<br>binding<br>protein 1) | gi 1140515<br>05,gi 11625<br>6076,gi 868<br>21084 | 46,490.00 | 100.00% | 12 | 15 | 26 | 0.28% | 36.80% | KAVAIISL 3.32<br>PK            | 926.6034 |
| ATP | 6011 | serpin<br>peptidase<br>inhibitor,<br>clade H<br>(heat<br>shock<br>protein<br>47),<br>member<br>1,<br>(collagen<br>binding<br>protein 1) | gi 1140515<br>05,gi 11625<br>6076,gi 868<br>21084 | 46,490.00 | 100.00% | 12 | 15 | 26 | 0.28% | 36.80% | LFYADH 2.54<br>PFIFLVR         | 1,637.88 |
| ATP | 6011 | serpin<br>peptidase<br>inhibitor,<br>clade H<br>(heat<br>shock<br>protein<br>47),<br>member<br>1,<br>(collagen<br>binding<br>protein 1) | gi 1140515<br>05,gi 11625<br>6076,gi 868<br>21084 | 46,490.00 | 100.00% | 12 | 15 | 26 | 0.28% | 36.80% | LSSLIIIM 2.45<br>PHHVEP<br>LER | 2,000.10 |
| ATP | 6011 | serpin<br>peptidase<br>inhibitor,<br>clade H<br>(heat<br>shock<br>protein<br>47),<br>member<br>1,<br>(collagen<br>binding<br>protein 1) | gi 1140515<br>05,gi 11625<br>6076,gi 868<br>21084 | 46,490.00 | 100.00% | 12 | 15 | 26 | 0.28% | 36.80% | LYGPSS 3.98<br>VSFAED<br>FVR   | 1,673.82 |

|     |      |                                                                                                                                         |                                                                               |            |         |    |    |    |       |        |                             |      |          |
|-----|------|-----------------------------------------------------------------------------------------------------------------------------------------|-------------------------------------------------------------------------------|------------|---------|----|----|----|-------|--------|-----------------------------|------|----------|
| ATP | 6011 | serpin<br>peptidase<br>inhibitor,<br>clade H<br>(heat<br>shock<br>protein<br>47),<br>member<br>1,<br>(collagen<br>binding<br>protein 1) | gi 1140515<br>05,gi 11625<br>6076,gi 868<br>21084                             | 46,490.00  | 100.00% | 12 | 15 | 26 | 0.28% | 36.80% | SAGLAF<br>SLYQAM<br>AK      | 4.45 | 1,473.74 |
| ATP | 6011 | PREDIC<br>TED:<br>hypotheti<br>cal<br>protein                                                                                           | gi 1946673<br>11                                                              | 68,113.30  | 100.00% | 3  | 4  | 4  | 0.04% | 4.97%  | ELESQIS<br>ELQEDL<br>ESER   | 3.84 | 2,033.95 |
| ATP | 6011 | PREDIC<br>TED:<br>hypotheti<br>cal<br>protein                                                                                           | gi 1946673<br>11                                                              | 68,113.30  | 100.00% | 3  | 4  | 4  | 0.04% | 4.97%  | IRELESQ<br>ISELQED<br>LESER | 3.8  | 2,303.14 |
| ATP | 6011 | PREDIC<br>TED:<br>hypotheti<br>cal<br>protein                                                                                           | gi 1946673<br>11                                                              | 68,113.30  | 100.00% | 3  | 4  | 4  | 0.04% | 4.97%  | XXXXXXX<br>XXXXXX           | 3.36 | 1,240.02 |
| ATP | 6011 | PREDIC<br>TED:<br>transmem<br>brane<br>emp24<br>protein<br>transport<br>domain<br>containin<br>g 4                                      | gi 1946663<br>84                                                              | 37,465.50  | 99.70%  | 2  | 2  | 3  | 0.03% | 5.97%  | DKLTEL<br>QLR               | 2.69 | 1,115.64 |
| ATP | 6011 | PREDIC<br>TED:<br>transmem<br>brane<br>emp24<br>protein<br>transport<br>domain<br>containin<br>g 4                                      | gi 1946663<br>84                                                              | 37,465.50  | 99.70%  | 2  | 2  | 3  | 0.03% | 5.97%  | QLLDQV<br>EQIQK             | 3.91 | 1,341.74 |
| ATP | 6011 | NNT<br>protein                                                                                                                          | gi 1337774<br>77,gi 16339<br>7,gi 163410<br>,gi 1720455<br>66,gi 27806<br>831 | 113,839.20 | 100.00% | 11 | 12 | 17 | 0.19% | 14.60% | DGQVIFP<br>APTPK            | 2.58 | 1,269.68 |
| ATP | 6011 | NNT<br>protein                                                                                                                          | gi 1337774<br>77,gi 16339<br>7,gi 163410<br>,gi 1720455<br>66,gi 27806<br>831 | 113,839.20 | 100.00% | 11 | 12 | 17 | 0.19% | 14.60% | EVLASD<br>LVVK              | 2.68 | 1,072.62 |
| ATP | 6011 | NNT<br>protein                                                                                                                          | gi 1337774<br>77,gi 16339<br>7,gi 163410<br>,gi 1720455<br>66,gi 27806<br>831 | 113,839.20 | 100.00% | 11 | 12 | 17 | 0.19% | 14.60% | FFTGQIT<br>AAGK             | 3.22 | 1,140.60 |



|     |      |                                                                              |                                                                               |            |         |    |    |    |       |        |                                                  |          |
|-----|------|------------------------------------------------------------------------------|-------------------------------------------------------------------------------|------------|---------|----|----|----|-------|--------|--------------------------------------------------|----------|
| ATP | 6011 | NNT<br>protein                                                               | gi 1337774<br>77,gi 16339<br>7,gi 163410<br>,gi 1720455<br>66,gi 27806<br>831 | 113,839.20 | 100.00% | 11 | 12 | 17 | 0.19% | 14.60% | GITHIGY 3.52<br>TDLPSR                           | 1,429.74 |
| ATP | 6011 | NNT<br>protein                                                               | gi 1337774<br>77,gi 16339<br>7,gi 163410<br>,gi 1720455<br>66,gi 27806<br>831 | 113,839.20 | 100.00% | 11 | 12 | 17 | 0.19% | 14.60% | GTVVM 3.4<br>KDGQVI<br>FPAPTPK                   | 1,901.02 |
| ATP | 6011 | NNT<br>protein                                                               | gi 1337774<br>77,gi 16339<br>7,gi 163410<br>,gi 1720455<br>66,gi 27806<br>831 | 113,839.20 | 100.00% | 11 | 12 | 17 | 0.19% | 14.60% | MATQAS 5.23<br>TLYSNNI<br>TK                     | 1,658.81 |
| ATP | 6011 | NNT<br>protein                                                               | gi 1337774<br>77,gi 16339<br>7,gi 163410<br>,gi 1720455<br>66,gi 27806<br>831 | 113,839.20 | 100.00% | 11 | 12 | 17 | 0.19% | 14.60% | SLGAEPL 2.91<br>EVDLK                            | 1,270.69 |
| ATP | 6011 | NNT<br>protein                                                               | gi 1337774<br>77,gi 16339<br>7,gi 163410<br>,gi 1720455<br>66,gi 27806<br>831 | 113,839.20 | 100.00% | 11 | 12 | 17 | 0.19% | 14.60% | SLGVGY 3.93<br>AAVDNP<br>IFYKPNT<br>AMLLGD<br>AK | 2,841.45 |
| ATP | 6011 | NNT<br>protein                                                               | gi 1337774<br>77,gi 16339<br>7,gi 163410<br>,gi 1720455<br>66,gi 27806<br>831 | 113,839.20 | 100.00% | 11 | 12 | 17 | 0.19% | 14.60% | TSGTLIS 3.11<br>FIYPAQN<br>PDLLNK                | 2,192.16 |
| ATP | 6011 | NNT<br>protein                                                               | gi 1337774<br>77,gi 16339<br>7,gi 163410<br>,gi 1720455<br>66,gi 27806<br>831 | 113,839.20 | 100.00% | 11 | 12 | 17 | 0.19% | 14.60% | VALSPA 3<br>GVQALV<br>K                          | 1,252.76 |
| ATP | 6011 | NNT<br>protein                                                               | gi 1337774<br>77,gi 16339<br>7,gi 163410<br>,gi 1720455<br>66,gi 27806<br>831 | 113,839.20 | 100.00% | 11 | 12 | 17 | 0.19% | 14.60% | VTIAQG 4.29<br>YDALSS<br>MANIAG<br>YK            | 2,089.03 |
| ATP | 6011 | Transme<br>mbrane<br>emp24-<br>like<br>traffickin<br>g protein<br>10 (yeast) | gi 1337781<br>87,gi 59858<br>463,gi 6290<br>1402,gi 949<br>66895              | 24,810.80  | 100.00% | 8  | 13 | 23 | 0.25% | 32.40% | IPDQLVI 4.21<br>LDMK                             | 1,300.72 |
| ATP | 6011 | Transme<br>mbrane<br>emp24-<br>like<br>traffickin<br>g protein<br>10 (yeast) | gi 1337781<br>87,gi 59858<br>463,gi 6290<br>1402,gi 949<br>66895              | 24,810.80  | 100.00% | 8  | 13 | 23 | 0.25% | 32.40% | IPDQLVI 2.7<br>LDMKHG<br>VEAK                    | 1,922.04 |

|     |      |                                                          |                                                     |           |         |   |    |    |       |        |                      |      |          |
|-----|------|----------------------------------------------------------|-----------------------------------------------------|-----------|---------|---|----|----|-------|--------|----------------------|------|----------|
| ATP | 6011 | Transmembrane emp24-like traffickin g protein 10 (yeast) | gi 133778187,gi 59858463,gi 62901402,gi 94966895    | 24,810.80 | 100.00% | 8 | 13 | 23 | 0.25% | 32.40% | ITDSAGH ILYSK        | 4.69 | 1,304.68 |
| ATP | 6011 | Transmembrane emp24-like traffickin g protein 10 (yeast) | gi 133778187,gi 59858463,gi 62901402,gi 94966895    | 24,810.80 | 100.00% | 8 | 13 | 23 | 0.25% | 32.40% | ITDSAGH ILYSKED ATK  | 5.62 | 1,848.93 |
| ATP | 6011 | Transmembrane emp24-like traffickin g protein 10 (yeast) | gi 133778187,gi 59858463,gi 62901402,gi 94966895    | 24,810.80 | 100.00% | 8 | 13 | 23 | 0.25% | 32.40% | LKPLEV ELR           | 3.68 | 1,096.67 |
| ATP | 6011 | Transmembrane emp24-like traffickin g protein 10 (yeast) | gi 133778187,gi 59858463,gi 62901402,gi 94966895    | 24,810.80 | 100.00% | 8 | 13 | 23 | 0.25% | 32.40% | NYEEIA KVEK          | 3.32 | 1,222.63 |
| ATP | 6011 | Transmembrane emp24-like traffickin g protein 10 (yeast) | gi 133778187,gi 59858463,gi 62901402,gi 94966895    | 24,810.80 | 100.00% | 8 | 13 | 23 | 0.25% | 32.40% | RLEDLSE SIVNDFA YMK  | 3.62 | 2,045.99 |
| ATP | 6011 | Transmembrane emp24-like traffickin g protein 10 (yeast) | gi 133778187,gi 59858463,gi 62901402,gi 94966895    | 24,810.80 | 100.00% | 8 | 13 | 23 | 0.25% | 32.40% | RLEDLSE SIVNDFA YMKK | 5.24 | 2,174.08 |
| ATP | 6011 | signal recognition particle receptor                     | gi 115497558,gi 122139924,gi 75773717               | 69,879.80 | 100.00% | 3 | 3  | 3  | 0.03% | 5.63%  | LIDGIVL TK           | 2.45 | 971.6138 |
| ATP | 6011 | signal recognition particle receptor                     | gi 115497558,gi 122139924,gi 75773717               | 69,879.80 | 100.00% | 3 | 3  | 3  | 0.03% | 5.63%  | NQGFVDV VLVDTA GR    | 3.77 | 1,490.76 |
| ATP | 6011 | signal recognition particle receptor                     | gi 115497558,gi 122139924,gi 75773717               | 69,879.80 | 100.00% | 3 | 3  | 3  | 0.03% | 5.63%  | VMGTFS TVTSTV K      | 2.74 | 1,373.70 |
| ATP | 6011 | CAPZA1 protein                                           | gi 133777466,gi 134085807,gi 152941212,gi 218563517 | 32,913.90 | 99.80%  | 2 | 2  | 2  | 0.02% | 9.79%  | FITHAPP GEFNEV FNDVR | 3.29 | 2,089.01 |

|     |      |                                           |                                                     |            |         |   |   |   |       |        |                                 |      |          |
|-----|------|-------------------------------------------|-----------------------------------------------------|------------|---------|---|---|---|-------|--------|---------------------------------|------|----------|
| ATP | 6011 | CAPZA1 protein                            | gi 133777466,gi 134085807,gi 152941212,gi 218563517 | 32,913.90  | 99.80%  | 2 | 2 | 2 | 0.02% | 9.79%  | LLLND NLLR                      | 2.92 | 1,197.70 |
| ATP | 6011 | Stromal interaction molecule 1            | gi 154426132,gi 61555683,gi 75057528,gi 78369570    | 77,134.40  | 99.80%  | 2 | 2 | 2 | 0.02% | 5.42%  | DLTHSD SESSLH MSDR              | 3.48 | 1,832.77 |
| ATP | 6011 | Stromal interaction molecule 1            | gi 154426132,gi 61555683,gi 75057528,gi 78369570    | 77,134.40  | 99.80%  | 2 | 2 | 2 | 0.02% | 5.42%  | KAAAE DNGSIG ETDSSPGR           | 3.71 | 2,119.94 |
| ATP | 6011 | emerin                                    | gi 37781186,gi 42733600,gi 74356375                 | 29,454.80  | 100.00% | 5 | 5 | 6 | 0.07% | 22.60% | FSDLDS ASVDS MYDLPK             | 3.58 | 2,020.87 |
| ATP | 6011 | emerin                                    | gi 37781186,gi 42733600,gi 74356375                 | 29,454.80  | 100.00% | 5 | 5 | 6 | 0.07% | 22.60% | FSDLDS ASVDS MYDLPK KEDALL YQSK | 3.27 | 3,196.49 |
| ATP | 6011 | emerin                                    | gi 37781186,gi 42733600,gi 74356375                 | 29,454.80  | 100.00% | 5 | 5 | 6 | 0.07% | 22.60% | GFRQPS ASLSDA DPFHR             | 3.72 | 1,887.91 |
| ATP | 6011 | emerin                                    | gi 37781186,gi 42733600,gi 74356375                 | 29,454.80  | 100.00% | 5 | 5 | 6 | 0.07% | 22.60% | LSPSS ASSFSYR                   | 1.75 | 1,472.70 |
| ATP | 6011 | emerin                                    | gi 37781186,gi 42733600,gi 74356375                 | 29,454.80  | 100.00% | 5 | 5 | 6 | 0.07% | 22.60% | QPSASL DADPFHR                  | 2.11 | 1,527.72 |
| ATP | 6011 | Lu-ECAM-1                                 | gi 2623765,gi 2623767,gi 30794326                   | 100,991.10 | 100.00% | 3 | 3 | 3 | 0.03% | 4.75%  | QESYDQ ADVIVA NPYLK             | 3.74 | 1,952.96 |
| ATP | 6011 | Lu-ECAM-1                                 | gi 2623765,gi 2623767,gi 30794326                   | 100,991.10 | 100.00% | 3 | 3 | 3 | 0.03% | 4.75%  | SGSITQ AIQLESK                  | 4.78 | 1,489.79 |
| ATP | 6011 | Lu-ECAM-1                                 | gi 2623765,gi 2623767,gi 30794326                   | 100,991.10 | 100.00% | 3 | 3 | 3 | 0.03% | 4.75%  | YGDDPY TLQYGR                   | 3.54 | 1,447.65 |
| ATP | 6011 | RecName : Full=Ras-related protein Rab-7a | gi 108860919,gi 74354082,gi 78045539                | 23,526.10  | 100.00% | 4 | 4 | 5 | 0.05% | 25.60% | ATIGADF LTK                     | 2.22 | 1,036.57 |
| ATP | 6011 | RecName : Full=Ras-related protein Rab-7a | gi 108860919,gi 74354082,gi 78045539                | 23,526.10  | 100.00% | 4 | 4 | 5 | 0.05% | 25.60% | DPENFP VVLGNK                   | 4.23 | 1,475.75 |
| ATP | 6011 | RecName : Full=Ras-related protein Rab-7a | gi 108860919,gi 74354082,gi 78045539                | 23,526.10  | 100.00% | 4 | 4 | 5 | 0.05% | 25.60% | FQSLGV AFYR                     | 2.81 | 1,187.62 |

|     |      |                                                                                             |                      |         |    |    |    |       |        |                                  |      |          |
|-----|------|---------------------------------------------------------------------------------------------|----------------------|---------|----|----|----|-------|--------|----------------------------------|------|----------|
| ATP | 6011 | RecName gi 1088609 :<br>19,gi 74354<br>Full=Ras-082,gi 7804<br>related<br>protein<br>Rab-7a | 23,526.10            | 100.00% | 4  | 4  | 5  | 0.05% | 25.60% | NALKQE<br>TEVELY<br>NEFPEPI<br>K | 3.52 | 2,391.21 |
| ATP | 6011 | heat shock<br>70kDa<br>protein 8                                                            | gi 1462317 71,224.20 | 100.00% | 11 | 14 | 16 | 0.17% | 21.10% | ARFEEL<br>NADLFR                 | 2.77 | 1,480.75 |
| ATP | 6011 | heat shock<br>70kDa<br>protein 8                                                            | gi 1462317 71,224.20 | 100.00% | 11 | 14 | 16 | 0.17% | 21.10% | DAGTIA<br>GLNVLR                 | 3.58 | 1,199.67 |
| ATP | 6011 | heat shock<br>70kDa<br>protein 8                                                            | gi 1462317 71,224.20 | 100.00% | 11 | 14 | 16 | 0.17% | 21.10% | FEELNA<br>DLFR                   | 2.31 | 1,253.62 |
| ATP | 6011 | heat shock<br>70kDa<br>protein 8                                                            | gi 1462317 71,224.20 | 100.00% | 11 | 14 | 16 | 0.17% | 21.10% | IINEPTA<br>AAIAYG<br>LDK         | 4.5  | 1,659.90 |
| ATP | 6011 | heat shock<br>70kDa<br>protein 8                                                            | gi 1462317 71,224.20 | 100.00% | 11 | 14 | 16 | 0.17% | 21.10% | IINEPTA<br>AAIAYG<br>LDKK        | 2.55 | 1,787.99 |
| ATP | 6011 | heat shock<br>70kDa<br>protein 8                                                            | gi 1462317 71,224.20 | 100.00% | 11 | 14 | 16 | 0.17% | 21.10% | LLQDFD<br>NGK                    | 2.5  | 1,081.57 |
| ATP | 6011 | heat shock<br>70kDa<br>protein 8                                                            | gi 1462317 71,224.20 | 100.00% | 11 | 14 | 16 | 0.17% | 21.10% | NQVAM<br>NPTNTV<br>FDAQ          | 4.14 | 1,665.79 |
| ATP | 6011 | heat shock<br>70kDa<br>protein 8                                                            | gi 1462317 71,224.20 | 100.00% | 11 | 14 | 16 | 0.17% | 21.10% | NSLESY<br>AFNMK                  | 2.88 | 1,319.59 |
| ATP | 6011 | heat shock<br>70kDa<br>protein 8                                                            | gi 1462317 71,224.20 | 100.00% | 11 | 14 | 16 | 0.17% | 21.10% | SFYPEEV<br>SSMVL<br>K            | 3.24 | 1,632.78 |
| ATP | 6011 | heat shock<br>70kDa<br>protein 8                                                            | gi 1462317 71,224.20 | 100.00% | 11 | 14 | 16 | 0.17% | 21.10% | STAGDT<br>HLGGED<br>FDNR         | 3.08 | 1,691.73 |
| ATP | 6011 | heat shock<br>70kDa<br>protein 8                                                            | gi 1462317 71,224.20 | 100.00% | 11 | 14 | 16 | 0.17% | 21.10% | TTPSYV<br>AFTDTE<br>R            | 3.33 | 1,487.70 |
| ATP | 6011 | heat shock<br>70kDa<br>protein 8                                                            | gi 1462317 71,224.20 | 100.00% | 11 | 14 | 16 | 0.17% | 21.10% | TVTNAV<br>VTVPAY<br>FNDSQR       | 3.63 | 1,982.00 |
| ATP | 6011 | solute carrier family 25, member A6                                                         | gi 1199365 32,860.40 | 100.00% | 9  | 11 | 34 | 0.37% | 27.90% | AAAYFGI<br>YDTAK                 | 3.61 | 1,219.60 |
| ATP | 6011 | solute carrier family 25, member A6                                                         | gi 1199365 32,860.40 | 100.00% | 9  | 11 | 34 | 0.37% | 27.90% | DFLAGGI<br>AAAISK                | 4.91 | 1,233.68 |

|     |      |                                                                             |                                       |            |         |   |    |    |       |        |                           |          |
|-----|------|-----------------------------------------------------------------------------|---------------------------------------|------------|---------|---|----|----|-------|--------|---------------------------|----------|
| ATP | 6011 | solute carrier family 25, member A6                                         | gi 119936593,gi 151557097,gi 32189336 | 32,860.40  | 100.00% | 9 | 11 | 34 | 0.37% | 27.90% | EQGVLS FWR 2.4            | 1,121.57 |
| ATP | 6011 | solute carrier family 25, member A6                                         | gi 119936593,gi 151557097,gi 32189336 | 32,860.40  | 100.00% | 9 | 11 | 34 | 0.37% | 27.90% | GMGGAF VLVLYD ELK 4.71    | 1,627.84 |
| ATP | 6011 | solute carrier family 25, member A6                                         | gi 119936593,gi 151557097,gi 32189336 | 32,860.40  | 100.00% | 9 | 11 | 34 | 0.37% | 27.90% | GMGGAF VLVLYD ELKK 4.62   | 1,755.94 |
| ATP | 6011 | solute carrier family 25, member A6                                         | gi 119936593,gi 151557097,gi 32189336 | 32,860.40  | 100.00% | 9 | 11 | 34 | 0.37% | 27.90% | LLLQVQ HASK 2.93          | 1,136.68 |
| ATP | 6011 | solute carrier family 25, member A6                                         | gi 119936593,gi 151557097,gi 32189336 | 32,860.40  | 100.00% | 9 | 11 | 34 | 0.37% | 27.90% | QIFLGGV DKR 2.24          | 1,132.65 |
| ATP | 6011 | solute carrier family 25, member A6                                         | gi 119936593,gi 151557097,gi 32189336 | 32,860.40  | 100.00% | 9 | 11 | 34 | 0.37% | 27.90% | YFPTQA LNFAFK 3.82        | 1,446.74 |
| ATP | 6011 | solute carrier family 25, member A6                                         | gi 119936593,gi 151557097,gi 32189336 | 32,860.40  | 100.00% | 9 | 11 | 34 | 0.37% | 27.90% | YFPTQA LNFAFK DK 3.93     | 1,689.86 |
| ATP | 6011 | PREDICTED: similar to filamin B, beta (actin binding protein 278) isoform 7 | gi 194677296                          | 277,977.20 | 100.00% | 8 | 8  | 8  | 0.09% | 5.53%  | FADEHV PGSPFTV K 3.43     | 1,530.76 |
| ATP | 6011 | PREDICTED: similar to filamin B, beta (actin binding protein 278) isoform 7 | gi 194677296                          | 277,977.20 | 100.00% | 8 | 8  | 8  | 0.09% | 5.53%  | GAGIGG LGITVEG PSESK 3.24 | 1,628.85 |

|     |      |                                                                                       |                                       |            |         |   |   |   |       |       |                                                            |          |
|-----|------|---------------------------------------------------------------------------------------|---------------------------------------|------------|---------|---|---|---|-------|-------|------------------------------------------------------------|----------|
| ATP | 6011 | PREDIC TED: 96<br>similar to filamin B, beta (actin binding protein 278)<br>isoform 7 | gi 1946772                            | 277,977.20 | 100.00% | 8 | 8 | 8 | 0.09% | 5.53% | GLVEPV 6.06<br>NVVDNG<br>DGTHTV<br>TYTPSQ<br>EGPYMV<br>SVK | 3,505.68 |
| ATP | 6011 | PREDIC TED: 96<br>similar to filamin B, beta (actin binding protein 278)<br>isoform 7 | gi 1946772                            | 277,977.20 | 100.00% | 8 | 8 | 8 | 0.09% | 5.53% | GQHVTG 3.09<br>SPFQFTV<br>GPLGEG<br>GAHK                   | 2,308.15 |
| ATP | 6011 | PREDIC TED: 96<br>similar to filamin B, beta (actin binding protein 278)<br>isoform 7 | gi 1946772                            | 277,977.20 | 100.00% | 8 | 8 | 8 | 0.09% | 5.53% | IFAQDG 3<br>DGQPIDI<br>QMK                                 | 1,791.86 |
| ATP | 6011 | PREDIC TED: 96<br>similar to filamin B, beta (actin binding protein 278)<br>isoform 7 | gi 1946772                            | 277,977.20 | 100.00% | 8 | 8 | 8 | 0.09% | 5.53% | LIALLEV 2.56<br>LSQK                                       | 1,226.77 |
| ATP | 6011 | PREDIC TED: 96<br>similar to filamin B, beta (actin binding protein 278)<br>isoform 7 | gi 1946772                            | 277,977.20 | 100.00% | 8 | 8 | 8 | 0.09% | 5.53% | SPFEVQ 4.24<br>VGPEAG<br>MQK                               | 1,619.77 |
| ATP | 6011 | PREDIC TED: 96<br>similar to filamin B, beta (actin binding protein 278)<br>isoform 7 | gi 1946772                            | 277,977.20 | 100.00% | 8 | 8 | 8 | 0.09% | 5.53% | VLFAQS 3.6<br>EIPTSFP<br>R                                 | 1,591.85 |
| ATP | 6011 | septin 2                                                                              | gi 114052905,gi 122069932,gi 84708845 | 41,554.10  | 99.80%  | 2 | 2 | 2 | 0.02% | 9.14% | ASIPFSV 2.73<br>VGSNQLI<br>EAK                             | 1,759.96 |
| ATP | 6011 | septin 2                                                                              | gi 114052905,gi 122069932,gi 84708845 | 41,554.10  | 99.80%  | 2 | 2 | 2 | 0.02% | 9.14% | KVENED 4.21<br>MNKDQI<br>LLEK                              | 1,961.99 |

|     |      |                                                                                                      |                                                 |            |         |   |   |   |       |        |                                                      |          |
|-----|------|------------------------------------------------------------------------------------------------------|-------------------------------------------------|------------|---------|---|---|---|-------|--------|------------------------------------------------------|----------|
| ATP | 6011 | plasma<br>membran<br>e calcium-55<br>transporti<br>ng<br>ATPase                                      | gi 1458276<br>2,gi 278072                       | 134,738.10 | 100.00% | 3 | 3 | 3 | 0.03% | 6.48%  | EANHDG 3.09<br>DFGITLA<br>ELR                        | 1,757.85 |
| ATP | 6011 | plasma<br>membran<br>e calcium-55<br>transporti<br>ng<br>ATPase                                      | gi 1458276<br>2,gi 278072                       | 134,738.10 | 100.00% | 3 | 3 | 3 | 0.03% | 6.48%  | GIIDSTV 2.82<br>SEQR                                 | 1,204.62 |
| ATP | 6011 | plasma<br>membran<br>e calcium-55<br>transporti<br>ng<br>ATPase                                      | gi 1458276<br>2,gi 278072                       | 134,738.10 | 100.00% | 3 | 3 | 3 | 0.03% | 6.48%  | KADVGF 3.28<br>AMGIAG<br>TDVAK                       | 1,666.85 |
| ATP | 6011 | plasma<br>membran<br>e calcium-55<br>transporti<br>ng<br>ATPase                                      | gi 1458276<br>2,gi 278072                       | 134,738.10 | 100.00% | 3 | 3 | 3 | 0.03% | 6.48%  | QVVAVT 4.91<br>GDGTND<br>GPALK                       | 1,641.84 |
| ATP | 6011 | plasma<br>membran<br>e calcium-55<br>transporti<br>ng<br>ATPase                                      | gi 1458276<br>2,gi 278072                       | 134,738.10 | 100.00% | 3 | 3 | 3 | 0.03% | 6.48%  | SATSSSP 3.19<br>GSPHLHL<br>ETSL                      | 1,757.86 |
| ATP | 6011 | PREDIC<br>TED:<br>similar to<br>Ras<br>GTPase-<br>activating-<br>like<br>protein<br>IQGAP1<br>(p195) | gi 1946767<br>12                                | 182,771.10 | 99.80%  | 2 | 2 | 2 | 0.02% | 2.06%  | IIGNLLY 2.52<br>YR                                   | 1,124.65 |
| ATP | 6011 | PREDIC<br>TED:<br>similar to<br>Ras<br>GTPase-<br>activating-<br>like<br>protein<br>IQGAP1<br>(p195) | gi 1946767<br>12                                | 182,771.10 | 99.80%  | 2 | 2 | 2 | 0.02% | 2.06%  | VNLLAA 4.56<br>LTNIDLA<br>LEQGS<br>PALFK             | 2,482.39 |
| ATP | 6011 | UNC84B<br>protein                                                                                    | gi 1515539<br>17,gi 15612<br>1283               | 81,429.80  | 99.80%  | 2 | 3 | 3 | 0.03% | 4.26%  | IRPTAVT 3.01<br>LEHVPK                               | 1,460.86 |
| ATP | 6011 | UNC84B<br>protein                                                                                    | gi 1515539<br>17,gi 15612<br>1283               | 81,429.80  | 99.80%  | 2 | 3 | 3 | 0.03% | 4.26%  | LEGQLA 3.43<br>GLRQEL<br>AALTLK                      | 1,924.12 |
| ATP | 6011 | heat<br>shock<br>protein<br>beta-1                                                                   | gi 7103740<br>5,gi 743548<br>63,gi 85542<br>053 | 22,375.10  | 100.00% | 4 | 4 | 4 | 0.04% | 31.80% | KYTLPP 3.83<br>GVDPTL<br>VSSSLSP<br>EGTLTV<br>EAPLPK | 3,193.72 |
| ATP | 6011 | heat<br>shock<br>protein<br>beta-1                                                                   | gi 7103740<br>5,gi 743548<br>63,gi 85542<br>053 | 22,375.10  | 100.00% | 4 | 4 | 4 | 0.04% | 31.80% | LFDQAF 3.58<br>GLPR                                  | 1,163.62 |
| ATP | 6011 | heat<br>shock<br>protein<br>beta-1                                                                   | gi 7103740<br>5,gi 743548<br>63,gi 85542<br>053 | 22,375.10  | 100.00% | 4 | 4 | 4 | 0.04% | 31.80% | QLSSGV 4.34<br>SEIQQTA<br>DR                         | 1,618.80 |

|     |      |                                                          |                                                 |            |         |   |   |   |       |        |                             |      |          |
|-----|------|----------------------------------------------------------|-------------------------------------------------|------------|---------|---|---|---|-------|--------|-----------------------------|------|----------|
| ATP | 6011 | heat shock protein beta-1                                | gi 71037405,gi 74354863,gi 85542053             | 22,375.10  | 100.00% | 4 | 4 | 4 | 0.04% | 31.80% | RVPFSLLR                    | 2.3  | 987.6098 |
| ATP | 6011 | ribosomal protein L4                                     | gi 61553010,gi 62460480,gi 73917531,gi 74267758 | 47,395.70  | 99.80%  | 2 | 2 | 2 | 0.02% | 8.53%  | APIRPDI VNFVHT NLR          | 2.2  | 1,862.04 |
| ATP | 6011 | ribosomal protein L4                                     | gi 61553010,gi 62460480,gi 73917531,gi 74267758 | 47,395.70  | 99.80%  | 2 | 2 | 2 | 0.02% | 8.53%  | IEEVPEL PLVVED KVEGYK K     | 1.77 | 2,313.26 |
| ATP | 6011 | PREDICTED: similar to carnitine palmitoyl transferase 1C | gi 194679924                                    | 80,680.30  | 99.80%  | 2 | 2 | 2 | 0.02% | 3.81%  | LPVPAV QDTVNR               | 2.83 | 1,308.73 |
| ATP | 6011 | PREDICTED: similar to carnitine palmitoyl transferase 1C | gi 194679924                                    | 80,680.30  | 99.80%  | 2 | 2 | 2 | 0.02% | 3.81%  | MTALAQ DFAVNL GPR           | 3.25 | 1,619.82 |
| ATP | 6011 | MYOIC protein                                            | gi 146186525,gi 147906576,gi 397403,gi 90109868 | 118,133.10 | 100.00% | 5 | 5 | 5 | 0.05% | 7.98%  | LLGVEG STL                  | 2.79 | 1,044.60 |
| ATP | 6011 | MYOIC protein                                            | gi 146186525,gi 147906576,gi 397403,gi 90109868 | 118,133.10 | 100.00% | 5 | 5 | 5 | 0.05% | 7.98%  | LLQSNP VLEAFG NAKTLR NDNSSR | 2.61 | 2,644.38 |
| ATP | 6011 | MYOIC protein                                            | gi 146186525,gi 147906576,gi 397403,gi 90109868 | 118,133.10 | 100.00% | 5 | 5 | 5 | 0.05% | 7.98%  | MSLLEL VEILK                | 3.4  | 1,303.75 |
| ATP | 6011 | MYOIC protein                                            | gi 146186525,gi 147906576,gi 397403,gi 90109868 | 118,133.10 | 100.00% | 5 | 5 | 5 | 0.05% | 7.98%  | VLQALG SEPIQYA VPVVK        | 3.5  | 1,911.10 |
| ATP | 6011 | MYOIC protein                                            | gi 146186525,gi 147906576,gi 397403,gi 90109868 | 118,133.10 | 100.00% | 5 | 5 | 5 | 0.05% | 7.98%  | VNNININ QGSITFA GGPR        | 3.52 | 1,928.99 |
| ATP | 6011 | PREDICTED: NOMO3-like protein isoform 2                  | gi 119916799,gi 119916801                       | 134,079.40 | 100.00% | 4 | 4 | 4 | 0.04% | 5.07%  | GQPLGP AGVQVSLR             | 3.53 | 1,378.78 |
| ATP | 6011 | PREDICTED: NOMO3-like protein isoform 2                  | gi 119916799,gi 119916801                       | 134,079.40 | 100.00% | 4 | 4 | 4 | 0.04% | 5.07%  | SSIDSEP ALVLGPLK            | 3.65 | 1,525.85 |



|     |      |                                                            |                                                     |            |         |   |   |    |       |        |                                                  |          |
|-----|------|------------------------------------------------------------|-----------------------------------------------------|------------|---------|---|---|----|-------|--------|--------------------------------------------------|----------|
| ATP | 6011 | PREDIC TED: NOMO3- like protein isoform 2                  | gi 1199167 99,gi 11991 6801                         | 134,079.40 | 100.00% | 4 | 4 | 4  | 0.04% | 5.07%  | VLNGPE 4.28<br>GEGVPD<br>AVVTLN<br>SQIK          | 2,236.18 |
| ATP | 6011 | PREDIC TED: NOMO3- like protein isoform 2                  | gi 1199167 99,gi 11991 6801                         | 134,079.40 | 100.00% | 4 | 4 | 4  | 0.04% | 5.07%  | VQVMVP 2.92<br>EAETR                             | 1,274.64 |
| ATP | 6011 | vesicle-associate d membrane protein 3                     | gi 1140523 42,gi 12213 6203,gi 868 22282            | 11,517.30  | 100.00% | 4 | 6 | 9  | 0.10% | 39.40% | ADALQA 3.6<br>GASQFE<br>TSAAK                    | 1,665.81 |
| ATP | 6011 | vesicle-associate d membrane protein 3                     | gi 1140523 42,gi 12213 6203,gi 868 22282            | 11,517.30  | 100.00% | 4 | 6 | 9  | 0.10% | 39.40% | LQQTQN 5.38<br>QVDEVV<br>DIMR                    | 1,931.95 |
| ATP | 6011 | vesicle-associate d membrane protein 3                     | gi 1140523 42,gi 12213 6203,gi 868 22282            | 11,517.30  | 100.00% | 4 | 6 | 9  | 0.10% | 39.40% | LSELDD 5.4<br>RADALQ<br>AGASQF<br>ETSAAK         | 2,494.21 |
| ATP | 6011 | vesicle-associate d membrane protein 3                     | gi 1140523 42,gi 12213 6203,gi 868 22282            | 11,517.30  | 100.00% | 4 | 6 | 9  | 0.10% | 39.40% | RLQQTQ 4.87<br>NQVDEV<br>VDIMR                   | 2,088.05 |
| ATP | 6011 | transmembrane emp24 protein transport domain containin g 9 | gi 5985849 1,gi 742679 97,gi 77736 600,gi 8117 5032 | 27,280.40  | 100.00% | 7 | 7 | 13 | 0.14% | 27.70% | DKLSEL 2.86<br>QLR                               | 1,101.63 |
| ATP | 6011 | transmembrane emp24 protein transport domain containin g 9 | gi 5985849 1,gi 742679 97,gi 77736 600,gi 8117 5032 | 27,280.40  | 100.00% | 7 | 7 | 13 | 0.14% | 27.70% | EEYQPA 2.75<br>TPGLGM<br>FVEVKD<br>PEDK          | 2,495.17 |
| ATP | 6011 | transmembrane emp24 protein transport domain containin g 9 | gi 5985849 1,gi 742679 97,gi 77736 600,gi 8117 5032 | 27,280.40  | 100.00% | 7 | 7 | 13 | 0.14% | 27.70% | EEYQPA 2.96<br>TPGLGM<br>FVEVKD<br>PEDKVIL<br>AR | 3,047.54 |
| ATP | 6011 | transmembrane emp24 protein transport domain containin g 9 | gi 5985849 1,gi 742679 97,gi 77736 600,gi 8117 5032 | 27,280.40  | 100.00% | 7 | 7 | 13 | 0.14% | 27.70% | FSLFAG 3.46<br>GMLR                              | 1,114.57 |

|     |      |                                                            |                                                                 |           |         |    |    |    |       |        |                                      |      |          |
|-----|------|------------------------------------------------------------|-----------------------------------------------------------------|-----------|---------|----|----|----|-------|--------|--------------------------------------|------|----------|
| ATP | 6011 | transmembrane emp24 protein transport domain containin g 9 | gi 5985849<br>1,gi 742679<br>97,gi 77736<br>600,gi 8117<br>5032 | 27,280.40 | 100.00% | 7  | 7  | 13 | 0.14% | 27.70% | QLVEQV<br>EQIQK                      | 4.45 | 1,341.74 |
| ATP | 6011 | transmembrane emp24 protein transport domain containin g 9 | gi 5985849<br>1,gi 742679<br>97,gi 77736<br>600,gi 8117<br>5032 | 27,280.40 | 100.00% | 7  | 7  | 13 | 0.14% | 27.70% | QLVEQV<br>EQIQKE<br>QNYQR            | 3.31 | 2,160.10 |
| ATP | 6011 | transmembrane emp24 protein transport domain containin g 9 | gi 5985849<br>1,gi 742679<br>97,gi 77736<br>600,gi 8117<br>5032 | 27,280.40 | 100.00% | 7  | 7  | 13 | 0.14% | 27.70% | QREEYQ<br>PATPGL<br>GMFVEV<br>KDPEDK | 3.53 | 2,779.32 |
| ATP | 6011 | RAB1A, member 48 RAS oncogene family                       | gi 1204194<br>48                                                | 22,660.40 | 100.00% | 4  | 6  | 11 | 0.12% | 36.10% | EFADSL<br>GIPFLET<br>SAK             | 3.98 | 1,724.87 |
| ATP | 6011 | RAB1A, member 48 RAS oncogene family                       | gi 1204194<br>48                                                | 22,660.40 | 100.00% | 4  | 6  | 11 | 0.12% | 36.10% | FADDTY<br>TESYISTI<br>GVDFK          | 2.44 | 2,172.00 |
| ATP | 6011 | RAB1A, member 48 RAS oncogene family                       | gi 1204194<br>48                                                | 22,660.40 | 100.00% | 4  | 6  | 11 | 0.12% | 36.10% | LLLIGDS<br>GVGK                      | 3.3  | 1,071.64 |
| ATP | 6011 | RAB1A, member 48 RAS oncogene family                       | gi 1204194<br>48                                                | 22,660.40 | 100.00% | 4  | 6  | 11 | 0.12% | 36.10% | LQIWDT<br>AGQER                      | 2.72 | 1,316.66 |
| ATP | 6011 | RAB1A, member 48 RAS oncogene family                       | gi 1204194<br>48                                                | 22,660.40 | 100.00% | 4  | 6  | 11 | 0.12% | 36.10% | NATNVE<br>QSFMTM<br>AAEIK            | 2.56 | 1,900.88 |
| ATP | 6011 | LMNB1 protein 4106                                         | gi 1544256<br>05,gi 15707<br>4106                               | 66,404.60 | 100.00% | 11 | 15 | 21 | 0.23% | 26.80% | FKAEHD<br>QLLLNY<br>AK               | 3.01 | 1,689.90 |
| ATP | 6011 | LMNB1 protein 4106                                         | gi 1544256<br>05,gi 15707<br>4106                               | 66,404.60 | 100.00% | 11 | 15 | 21 | 0.23% | 26.80% | IESLSSQ<br>LSNLQK                    | 4.38 | 1,446.78 |
| ATP | 6011 | LMNB1 protein 4106                                         | gi 1544256<br>05,gi 15707<br>4106                               | 66,404.60 | 100.00% | 11 | 15 | 21 | 0.23% | 26.80% | IQELEDL<br>LAK                       | 3.2  | 1,171.66 |
| ATP | 6011 | LMNB1 protein 4106                                         | gi 1544256<br>05,gi 15707<br>4106                               | 66,404.60 | 100.00% | 11 | 15 | 21 | 0.23% | 26.80% | LALDME<br>ISAYRK                     | 2.67 | 1,425.74 |
| ATP | 6011 | LMNB1 protein 4106                                         | gi 1544256<br>05,gi 15707<br>4106                               | 66,404.60 | 100.00% | 11 | 15 | 21 | 0.23% | 26.80% | LAQALH<br>EMREQH<br>DAQVK            | 2.38 | 2,020.00 |
| ATP | 6011 | LMNB1 protein 4106                                         | gi 1544256<br>05,gi 15707<br>4106                               | 66,404.60 | 100.00% | 11 | 15 | 21 | 0.23% | 26.80% | LREYEA<br>ALNSK                      | 3.2  | 1,293.68 |

|     |      |                                                         |                                                                                                                                                           |           |         |    |    |    |       |        |                                                |      |          |
|-----|------|---------------------------------------------------------|-----------------------------------------------------------------------------------------------------------------------------------------------------------|-----------|---------|----|----|----|-------|--------|------------------------------------------------|------|----------|
| ATP | 6011 | LMNB1<br>protein                                        | gi 1544256<br>05,gi 15707<br>4106                                                                                                                         | 66,404.60 | 100.00% | 11 | 15 | 21 | 0.23% | 26.80% | LYKEEL<br>EQTYHA<br>K                          | 3.83 | 1,651.83 |
| ATP | 6011 | LMNB1<br>protein                                        | gi 1544256<br>05,gi 15707<br>4106                                                                                                                         | 66,404.60 | 100.00% | 11 | 15 | 21 | 0.23% | 26.80% | MRIESLS<br>SQLSNL<br>QK                        | 3.44 | 1,749.92 |
| ATP | 6011 | LMNB1<br>protein                                        | gi 1544256<br>05,gi 15707<br>4106                                                                                                                         | 66,404.60 | 100.00% | 11 | 15 | 21 | 0.23% | 26.80% | NMYEEE<br>INETR                                | 3.39 | 1,443.61 |
| ATP | 6011 | LMNB1<br>protein                                        | gi 1544256<br>05,gi 15707<br>4106                                                                                                                         | 66,404.60 | 100.00% | 11 | 15 | 21 | 0.23% | 26.80% | SLESDLE<br>DLKDQI<br>AQLEAS<br>LAAAK           | 5.35 | 2,558.32 |
| ATP | 6011 | LMNB1<br>protein                                        | gi 1544256<br>05,gi 15707<br>4106                                                                                                                         | 66,404.60 | 100.00% | 11 | 15 | 21 | 0.23% | 26.80% | TTIPEEE<br>EEEEEA<br>AEVAVE<br>EELFHQ<br>QGAPR | 4.46 | 3,425.55 |
| ATP | 6011 | RecName<br>:<br>Full=40S<br>ribosomal<br>protein<br>S20 | gi 1088609<br>55,gi 61822<br>677,gi 7358<br>7131,gi 777<br>35823                                                                                          | 13,355.00 | 100.00% | 3  | 4  | 4  | 0.04% | 22.70% | DTGKTP<br>VEPEVAI<br>HR                        | 3.71 | 1,648.87 |
| ATP | 6011 | RecName<br>:<br>Full=40S<br>ribosomal<br>protein<br>S20 | gi 1088609<br>55,gi 61822<br>677,gi 7358<br>7131,gi 777<br>35823                                                                                          | 13,355.00 | 100.00% | 3  | 4  | 4  | 0.04% | 22.70% | LIDLHSP<br>SEIVK                               | 1.93 | 1,350.76 |
| ATP | 6011 | RecName<br>:<br>Full=40S<br>ribosomal<br>protein<br>S20 | gi 1088609<br>55,gi 61822<br>677,gi 7358<br>7131,gi 777<br>35823                                                                                          | 13,355.00 | 100.00% | 3  | 4  | 4  | 0.04% | 22.70% | TPVEPE<br>VAIHR                                | 4.14 | 1,247.67 |
| ATP | 6011 | peroxired<br>oxin 1                                     | gi 1240784<br>5,gi 151556<br>396,gi 2780<br>6081,gi 281<br>89861,gi 59<br>858511,gi 6<br>6773956                                                          | 22,148.30 | 99.80%  | 2  | 2  | 2  | 0.02% | 11.10% | GLFIIDD<br>KGILR                               | 2.74 | 1,359.80 |
| ATP | 6011 | peroxired<br>oxin 1                                     | gi 1240784<br>5,gi 151556<br>396,gi 2780<br>6081,gi 281<br>89861,gi 59<br>858511,gi 6<br>6773956                                                          | 22,148.30 | 99.80%  | 2  | 2  | 2  | 0.02% | 11.10% | TIAQDY<br>GVLK                                 | 2.68 | 1,107.60 |
| ATP | 6011 | CALM3<br>protein                                        | gi 1113085<br>39,gi 11405<br>3089,gi 115<br>305083,gi 1<br>57831834,g<br>i 15787966<br>9,gi 194671<br>098,gi 2818<br>9857,gi 490<br>37473,gi 86<br>822265 | 19,973.60 | 100.00% | 3  | 5  | 7  | 0.08% | 26.40% | EAFSLFD<br>KDG DGT<br>ITTK                     | 2.85 | 1,844.89 |

|     |      |                                                                                                                                                                                                                                                                                                   |                                                                                                                                                           |           |         |   |   |   |       |        |                               |          |
|-----|------|---------------------------------------------------------------------------------------------------------------------------------------------------------------------------------------------------------------------------------------------------------------------------------------------------|-----------------------------------------------------------------------------------------------------------------------------------------------------------|-----------|---------|---|---|---|-------|--------|-------------------------------|----------|
| ATP | 6011 | CALM3<br>protein                                                                                                                                                                                                                                                                                  | gi 1113085<br>39,gi 11405<br>3089,gi 115<br>305083,gi 1<br>57831834,g<br>i 15787966<br>9,gi 194671<br>098,gi 2818<br>9857,gi 490<br>37473,gi 86<br>822265 | 19,973.60 | 100.00% | 3 | 5 | 7 | 0.08% | 26.40% | MKDTDS 2.55<br>EEEIREA<br>FR  | 1,871.84 |
| ATP | 6011 | CALM3<br>protein                                                                                                                                                                                                                                                                                  | gi 1113085<br>39,gi 11405<br>3089,gi 115<br>305083,gi 1<br>57831834,g<br>i 15787966<br>9,gi 194671<br>098,gi 2818<br>9857,gi 490<br>37473,gi 86<br>822265 | 19,973.60 | 100.00% | 3 | 5 | 7 | 0.08% | 26.40% | VFDKDG 4.87<br>NGYISA<br>AELR | 1,754.87 |
| ATP | 6011 | RecName<br>:<br>Full=Cyt<br>ochrome<br>c oxidase<br>polypepti<br>de 7A2,<br>mitochon<br>drial;<br>AltName:<br>Full=Cyt<br>ochrome<br>c oxidase<br>polypepti<br>de VIIa-<br>liver/hear<br>t;<br>Short=Cy<br>tochrome<br>c oxidase<br>subunit<br>VIIa-L;<br>Short=VI<br>IIC;<br>Flags:<br>Precursor | gi 117120,g<br>i 28461241,<br>gi 488158,g<br>i 74354141                                                                                                   | 9,305.40  | 99.80%  | 2 | 3 | 5 | 0.05% | 27.70% | GGIADA 3.32<br>LLYR           | 1,048.58 |

|     |      |                                                                                                                                                                                                                                                                                                   |                                                                                                                           |           |         |   |   |   |       |        |                                           |          |
|-----|------|---------------------------------------------------------------------------------------------------------------------------------------------------------------------------------------------------------------------------------------------------------------------------------------------------|---------------------------------------------------------------------------------------------------------------------------|-----------|---------|---|---|---|-------|--------|-------------------------------------------|----------|
| ATP | 6011 | RecName<br>:<br>Full=Cyt<br>ochrome<br>c oxidase<br>polypepti<br>de 7A2,<br>mitochon<br>drial;<br>AltName:<br>Full=Cyt<br>ochrome<br>c oxidase<br>polypepti<br>de VIIa-<br>liver/hear<br>t;<br>Short=Cy<br>tochrome<br>c oxidase<br>subunit<br>VIIa-L;<br>Short=VI<br>IIC;<br>Flags:<br>Precursor | gi 117120.g<br>i 28461241,<br>gi 488158.g<br>i 74354141                                                                   | 9,305.40  | 99.80%  | 2 | 3 | 5 | 0.05% | 27.70% | LFQEDN 2.73<br>GIPVHLK                    | 1,509.81 |
| ATP | 6011 | RecName<br>:<br>Full=NA<br>DPH--<br>cytochro<br>me P450<br>reductase<br>;<br>Short=CP<br>R;<br>Short=P4<br>50R                                                                                                                                                                                    | gi 1102876<br>86,gi 14623<br>1834,gi 742<br>68199,gi 78<br>369374                                                         | 77,249.90 | 100.00% | 2 | 2 | 2 | 0.02% | 6.76%  | ATTPVI 4.06<br>MVGPGT<br>GVAPFIG<br>FIQER | 2,474.31 |
| ATP | 6011 | RecName<br>:<br>Full=NA<br>DPH--<br>cytochro<br>me P450<br>reductase<br>;<br>Short=CP<br>R;<br>Short=P4<br>50R                                                                                                                                                                                    | gi 1102876<br>86,gi 14623<br>1834,gi 742<br>68199,gi 78<br>369374                                                         | 77,249.90 | 100.00% | 2 | 2 | 2 | 0.02% | 6.76%  | GMAADP 4.17<br>EEYDLA<br>DLSSLPE<br>IEK   | 2,409.10 |
| ATP | 6011 | MTCH1<br>protein                                                                                                                                                                                                                                                                                  | gi 1544261<br>80,gi 15707<br>4126                                                                                         | 41,499.70 | 100.00% | 2 | 2 | 2 | 0.02% | 8.23%  | LLIQVGH 2.87<br>EPMPPTI<br>GTNVLG<br>R    | 2,258.23 |
| ATP | 6011 | MTCH1<br>protein                                                                                                                                                                                                                                                                                  | gi 1544261<br>80,gi 15707<br>4126                                                                                         | 41,499.70 | 100.00% | 2 | 2 | 2 | 0.02% | 8.23%  | LMSNAL 3.15<br>STVTR                      | 1,208.63 |
| ATP | 6011 | RecName<br>:<br>Full=Hist<br>one<br>H2A.V;<br>AltName:<br>Full=H2<br>A.F/Z                                                                                                                                                                                                                        | gi 1099400<br>32,gi 16315<br>0,gi 278073<br>73,gi 410,gi<br> 81674301,<br>gi 8167475<br>5,gi 832884<br>07,gi 84000<br>371 | 13,535.20 | 100.00% | 3 | 6 | 8 | 0.09% | 41.40% | ATIAGG 3.76<br>GVIPHIH<br>K               | 1,370.79 |

|     |      |                                                                                                                                                                                 |                      |         |    |    |    |       |        |                                                    |          |
|-----|------|---------------------------------------------------------------------------------------------------------------------------------------------------------------------------------|----------------------|---------|----|----|----|-------|--------|----------------------------------------------------|----------|
| ATP | 6011 | RecName gi 1099400<br>: 32,gi 16315<br>Full=Hist 0,gi 278073<br>one 73,gi 410,gi<br>H2A.V;  81674301,<br>AltName: gi 8167475<br>Full=H2 5,gi 832884<br>A.F/Z 07,gi 84000<br>371 | 13,535.20            | 100.00% | 3  | 6  | 8  | 0.09% | 41.40% | GDEELD 3.01<br>SLIK                                | 1,118.56 |
| ATP | 6011 | RecName gi 1099400<br>: 32,gi 16315<br>Full=Hist 0,gi 278073<br>one 73,gi 410,gi<br>H2A.V;  81674301,<br>AltName: gi 8167475<br>Full=H2 5,gi 832884<br>A.F/Z 07,gi 84000<br>371 | 13,535.20            | 100.00% | 3  | 6  | 8  | 0.09% | 41.40% | VGATAA 4.75<br>VYSAAIL<br>EYLTAE<br>VLELAG<br>NASK | 2,895.54 |
| ATP | 6011 | non-<br>muscle<br>myosin<br>heavy<br>chain                                                                                                                                      | gi 3205211 72,354.70 | 100.00% | 10 | 13 | 15 | 0.16% | 22.40% | ALEEAM 3.83<br>EQKAEL<br>ER                        | 1,662.80 |
| ATP | 6011 | non-<br>muscle<br>myosin<br>heavy<br>chain                                                                                                                                      | gi 3205211 72,354.70 | 100.00% | 10 | 13 | 15 | 0.16% | 22.40% | ANLQID 4.81<br>QLNTDL<br>NLER                      | 1,869.97 |
| ATP | 6011 | non-<br>muscle<br>myosin<br>heavy<br>chain                                                                                                                                      | gi 3205211 72,354.70 | 100.00% | 10 | 13 | 15 | 0.16% | 22.40% | ELEDAT 3.54<br>ETADAM<br>NR                        | 1,581.67 |
| ATP | 6011 | non-<br>muscle<br>myosin<br>heavy<br>chain                                                                                                                                      | gi 3205211 72,354.70 | 100.00% | 10 | 13 | 15 | 0.16% | 22.40% | IAQLEEE 4.03<br>LEEEQG<br>NTELVN<br>DR             | 2,458.16 |
| ATP | 6011 | non-<br>muscle<br>myosin<br>heavy<br>chain                                                                                                                                      | gi 3205211 72,354.70 | 100.00% | 10 | 13 | 15 | 0.16% | 22.40% | IAQLEEQ 3.85<br>LDNETK                             | 1,530.76 |
| ATP | 6011 | non-<br>muscle<br>myosin<br>heavy<br>chain                                                                                                                                      | gi 3205211 72,354.70 | 100.00% | 10 | 13 | 15 | 0.16% | 22.40% | IAQLEEQ 2.61<br>LDNETK<br>ER                       | 1,815.91 |
| ATP | 6011 | non-<br>muscle<br>myosin<br>heavy<br>chain                                                                                                                                      | gi 3205211 72,354.70 | 100.00% | 10 | 13 | 15 | 0.16% | 22.40% | LKDVLL 3.62<br>QVDDER<br>R                         | 1,598.89 |
| ATP | 6011 | non-<br>muscle<br>myosin<br>heavy<br>chain                                                                                                                                      | gi 3205211 72,354.70 | 100.00% | 10 | 13 | 15 | 0.16% | 22.40% | NAEQYK 3.23<br>DQADKA<br>STR                       | 1,724.82 |
| ATP | 6011 | non-<br>muscle<br>myosin<br>heavy<br>chain                                                                                                                                      | gi 3205211 72,354.70 | 100.00% | 10 | 13 | 15 | 0.16% | 22.40% | QAQQR 4.38<br>DELADEI<br>ANSSGK                    | 2,088.98 |
| ATP | 6011 | non-<br>muscle<br>myosin<br>heavy<br>chain                                                                                                                                      | gi 3205211 72,354.70 | 100.00% | 10 | 13 | 15 | 0.16% | 22.40% | QISTLHA 2.57<br>QVTDNR                             | 1,515.76 |

|     |      |                                                                      |                                                   |            |         |    |    |    |       |        |                                               |          |
|-----|------|----------------------------------------------------------------------|---------------------------------------------------|------------|---------|----|----|----|-------|--------|-----------------------------------------------|----------|
| ATP | 6011 | NADH dehydrogenase                                                   | gi 240,gi 28461207,gi 400384,gi 74267733          | 15,035.50  | 99.80%  | 2  | 2  | 2  | 0.02% | 14.80% | FFHETEA 2.75<br>PRPK                          | 1,358.69 |
| ATP | 6011 | NADH dehydrogenase                                                   | gi 240,gi 28461207,gi 400384,gi 74267733          | 15,035.50  | 99.80%  | 2  | 2  | 2  | 0.02% | 14.80% | VVDLLVI 2.05<br>K                             | 898.5973 |
| ATP | 6011 | RPN1 protein                                                         | gi 126717391,gi 129277520                         | 68,335.00  | 100.00% | 12 | 17 | 28 | 0.31% | 30.40% | AASFLL 4.75<br>ALEPELE<br>AR                  | 1,629.88 |
| ATP | 6011 | RPN1 protein                                                         | gi 126717391,gi 129277520                         | 68,335.00  | 100.00% | 12 | 17 | 28 | 0.31% | 30.40% | IDHILDA 2.49<br>L                             | 909.5042 |
| ATP | 6011 | RPN1 protein                                                         | gi 126717391,gi 129277520                         | 68,335.00  | 100.00% | 12 | 17 | 28 | 0.31% | 30.40% | ISVIVEA 3.22<br>VYTHVL<br>QPYPYPTQI<br>TQSEK  | 2,843.52 |
| ATP | 6011 | RPN1 protein                                                         | gi 126717391,gi 129277520                         | 68,335.00  | 100.00% | 12 | 17 | 28 | 0.31% | 30.40% | LPVALD 1.78<br>PGAK                           | 980.5777 |
| ATP | 6011 | RPN1 protein                                                         | gi 126717391,gi 129277520                         | 68,335.00  | 100.00% | 12 | 17 | 28 | 0.31% | 30.40% | LVDHVF 3.21<br>DEQVIDS<br>LTVK                | 1,957.03 |
| ATP | 6011 | RPN1 protein                                                         | gi 126717391,gi 129277520                         | 68,335.00  | 100.00% | 12 | 17 | 28 | 0.31% | 30.40% | NIQVDSP 3.48<br>YEISR                         | 1,420.71 |
| ATP | 6011 | RPN1 protein                                                         | gi 126717391,gi 129277520                         | 68,335.00  | 100.00% | 12 | 17 | 28 | 0.31% | 30.40% | QFVVFE 4.18<br>GNHYFY<br>SPYPTK               | 2,223.05 |
| ATP | 6011 | RPN1 protein                                                         | gi 126717391,gi 129277520                         | 68,335.00  | 100.00% | 12 | 17 | 28 | 0.31% | 30.40% | SEDLDD 4.18<br>YGPFR                          | 1,311.62 |
| ATP | 6011 | RPN1 protein                                                         | gi 126717391,gi 129277520                         | 68,335.00  | 100.00% | 12 | 17 | 28 | 0.31% | 30.40% | THYIVG 4.2<br>YNLPSY<br>EYLYNL<br>GDQYAL<br>K | 2,997.47 |
| ATP | 6011 | RPN1 protein                                                         | gi 126717391,gi 129277520                         | 68,335.00  | 100.00% | 12 | 17 | 28 | 0.31% | 30.40% | TVDLSS 3.1<br>HLAK                            | 1,070.58 |
| ATP | 6011 | RPN1 protein                                                         | gi 126717391,gi 129277520                         | 68,335.00  | 100.00% | 12 | 17 | 28 | 0.31% | 30.40% | VHSENN 4.29<br>SPFLTIT<br>SMTR                | 1,949.94 |
| ATP | 6011 | RPN1 protein                                                         | gi 126717391,gi 129277520                         | 68,335.00  | 100.00% | 12 | 17 | 28 | 0.31% | 30.40% | VTAEVV 5.37<br>LAHAGS<br>GSSPR                | 1,637.86 |
| ATP | 6011 | RecName : Full=60S ribosomal L8                                      | gi 108860941,gi 154426156,gi 74267654,gi 77736197 | 28,006.80  | 99.80%  | 2  | 2  | 2  | 0.02% | 6.61%  | ASGNYA 1.88<br>TVISHNP<br>ETK                 | 1,688.82 |
| ATP | 6011 | RecName : Full=60S ribosomal protein L8                              | gi 108860941,gi 154426156,gi 74267654,gi 77736197 | 28,006.80  | 99.80%  | 2  | 2  | 2  | 0.02% | 6.61%  | ASGNYA 3.12<br>TVISHNP<br>ETKK                | 1,816.92 |
| ATP | 6011 | Family with sequence similarity 62 (C2 domain containin g), member A | gi 117306190,gi 118150984                         | 123,012.90 | 100.00% | 3  | 3  | 3  | 0.03% | 4.61%  | ALTLGA 2.81<br>LTLPLAR                        | 1,309.82 |

|     |      |                                                                                                                      |                                        |            |         |   |   |   |       |        |                                          |          |
|-----|------|----------------------------------------------------------------------------------------------------------------------|----------------------------------------|------------|---------|---|---|---|-------|--------|------------------------------------------|----------|
| ATP | 6011 | Family with sequence similarity 62 (C2 domain containin g), member A                                                 | gi 117306190,gi 118150984              | 123,012.90 | 100.00% | 3 | 3 | 3 | 0.03% | 4.61%  | GEGSGT 4.36<br>LGSLSLP<br>LSELLVA<br>DR  | 2,171.16 |
| ATP | 6011 | Family with sequence similarity 62 (C2 domain containin g), member A                                                 | gi 117306190,gi 118150984              | 123,012.90 | 100.00% | 3 | 3 | 3 | 0.03% | 4.61%  | LLVPLVP 2.44<br>DLQDVA<br>QLR            | 1,789.06 |
| ATP | 6011 | GANAB protein                                                                                                        | gi 151553519,gi 194679898              | 109,455.80 | 100.00% | 7 | 7 | 7 | 0.08% | 13.10% | ALLDSL 2.33<br>QLGPDA<br>LTVHLIN<br>EVTK | 2,460.37 |
| ATP | 6011 | GANAB protein                                                                                                        | gi 151553519,gi 194679898              | 109,455.80 | 100.00% | 7 | 7 | 7 | 0.08% | 13.10% | LKVTEG 2.65<br>GEPYR                     | 1,248.66 |
| ATP | 6011 | GANAB protein                                                                                                        | gi 151553519,gi 194679898              | 109,455.80 | 100.00% | 7 | 7 | 7 | 0.08% | 13.10% | LSFQHD 4.38<br>PETSVLI<br>LR             | 1,754.94 |
| ATP | 6011 | GANAB protein                                                                                                        | gi 151553519,gi 194679898              | 109,455.80 | 100.00% | 7 | 7 | 7 | 0.08% | 13.10% | MLDYLQ 4.95<br>GSGETP<br>QTDVR           | 1,925.89 |
| ATP | 6011 | GANAB protein                                                                                                        | gi 151553519,gi 194679898              | 109,455.80 | 100.00% | 7 | 7 | 7 | 0.08% | 13.10% | QYASLT 3.61<br>GTQALP<br>PLFSLGY<br>HQSR | 2,535.30 |
| ATP | 6011 | GANAB protein                                                                                                        | gi 151553519,gi 194679898              | 109,455.80 | 100.00% | 7 | 7 | 7 | 0.08% | 13.10% | VVIIGAG 3.98<br>KPATVV<br>LQTK           | 1,694.06 |
| ATP | 6011 | GANAB protein                                                                                                        | gi 151553519,gi 194679898              | 109,455.80 | 100.00% | 7 | 7 | 7 | 0.08% | 13.10% | YHGPQT 4.3<br>LYLPVT<br>LSSIPVF<br>QR    | 2,416.30 |
| ATP | 6011 | Myosin ID                                                                                                            | gi 109659303,gi 115497786,gi 122145769 | 115,924.40 | 99.80%  | 2 | 2 | 2 | 0.02% | 2.58%  | DVIDKQ 4.36<br>HTEQEA<br>SYGR            | 1,875.88 |
| ATP | 6011 | Myosin ID                                                                                                            | gi 109659303,gi 115497786,gi 122145769 | 115,924.40 | 99.80%  | 2 | 2 | 2 | 0.02% | 2.58%  | LNQPQP 2.43<br>DFTK                      | 1,187.61 |
| ATP | 6011 | RecName : Full=Pyr uvate dehydrog enase E1 compone nt subunit beta, mitochon drial; Short=P DHE1-B; Flags: Precursor | gi 116242689,gi 151556071,gi 164420789 | 39,108.20  | 99.90%  | 2 | 2 | 2 | 0.02% | 8.91%  | EAINQG 2.84<br>MDEELE<br>RDEK            | 1,921.84 |



|     |      |                                                                                                                                                                                                                                                                                      |                                                                                                                                                 |           |         |   |   |    |       |        |                               |          |
|-----|------|--------------------------------------------------------------------------------------------------------------------------------------------------------------------------------------------------------------------------------------------------------------------------------------|-------------------------------------------------------------------------------------------------------------------------------------------------|-----------|---------|---|---|----|-------|--------|-------------------------------|----------|
| ATP | 6011 | RecName<br>:<br>Full=Pyr<br>uvate<br>dehydrog<br>enase E1<br>compone<br>nt<br>subunit<br>beta,<br>mitochon<br>drial;<br>Short=P<br>DHE1-B;<br>Flags:<br>Precursor                                                                                                                    | gi 1162426<br>89,gi 15155<br>6071,gi 164<br>420789                                                                                              | 39,108.20 | 99.90%  | 2 | 2 | 2  | 0.02% | 8.91%  | IMEGPAF 4.19<br>NFLDAP<br>AVR | 1,763.88 |
| ATP | 6011 | RecName<br>:<br>Full=Cyt<br>ochrome<br>c oxidase<br>subunit 4<br>isoform<br>1,<br>mitochon<br>drial;<br>AltName:<br>Full=Cyt<br>ochrome<br>c oxidase<br>subunit<br>IV<br>isoform<br>1;<br>Short=C<br>OX IV-1;<br>AltName:<br>Full=Cyt<br>ochrome<br>c oxidase<br>polypepti<br>de IV; | gi 117085,g<br>i 14924153<br>9,gi 149241<br>552,gi 1492<br>41569,gi 14<br>9241582,gi <br>149241599,<br>gi 1492416<br>12,gi 47824<br>862,gi 5063 | 19,554.00 | 100.00% | 4 | 5 | 16 | 0.17% | 20.10% | DYPLPD 2.59<br>VAHVK          | 1,253.65 |
| ATP | 6011 | RecName<br>:<br>Full=Cyt<br>ochrome<br>c oxidase<br>subunit 4<br>isoform<br>1,<br>mitochon<br>drial;<br>AltName:<br>Full=Cyt<br>ochrome<br>c oxidase<br>subunit<br>IV<br>isoform<br>1;<br>Short=C<br>OX IV-1;<br>AltName:<br>Full=Cyt<br>ochrome<br>c oxidase<br>polypepti<br>de IV; | gi 117085,g<br>i 14924153<br>9,gi 149241<br>552,gi 1492<br>41569,gi 14<br>9241582,gi <br>149241599,<br>gi 1492416<br>12,gi 47824<br>862,gi 5063 | 19,554.00 | 100.00% | 4 | 5 | 16 | 0.17% | 20.10% | FKESFAE 3.98<br>MNR           | 1,274.58 |

|     |      |                                                                                                                                                                                                                                                                                      |                                                                                                                                                                                       |           |         |   |    |    |       |        |                                     |      |          |
|-----|------|--------------------------------------------------------------------------------------------------------------------------------------------------------------------------------------------------------------------------------------------------------------------------------------|---------------------------------------------------------------------------------------------------------------------------------------------------------------------------------------|-----------|---------|---|----|----|-------|--------|-------------------------------------|------|----------|
| ATP | 6011 | RecName<br>:<br>Full=Cyt<br>ochrome<br>c oxidase<br>subunit 4<br>isoform<br>1,<br>mitochon<br>drial;<br>AltName:<br>Full=Cyt<br>ochrome<br>c oxidase<br>subunit<br>IV<br>isoform<br>1;<br>Short=C<br>OX IV-1;<br>AltName:<br>Full=Cyt<br>ochrome<br>c oxidase<br>polypepti<br>de IV; | gi 117085.g<br>i 14924153<br>9,gi 149241<br>552,gi 1492<br>41569,gi 14<br>9241582,gi <br>149241599,<br>gi 1492416<br>12,gi 47824<br>862,gi 5063<br>89,gi 59858<br>423,gi 7435<br>4123 | 19,554.00 | 100.00% | 4 | 5  | 16 | 0.17% | 20.10% | SEDYAL<br>PSYVDR                    | 3.66 | 1,414.65 |
| ATP | 6011 | RecName<br>:<br>Full=Cyt<br>ochrome<br>c oxidase<br>subunit 4<br>isoform<br>1,<br>mitochon<br>drial;<br>AltName:<br>Full=Cyt<br>ochrome<br>c oxidase<br>polypepti<br>de IV;                                                                                                          | gi 117085.g<br>i 14924153<br>9,gi 149241<br>552,gi 1492<br>41569,gi 14<br>9241582,gi <br>149241599,<br>gi 1492416<br>12,gi 47824<br>862,gi 5063<br>89,gi 59858<br>423,gi 7435<br>4123 | 19,554.00 | 100.00% | 4 | 5  | 16 | 0.17% | 20.10% | SEDYAL<br>PSYVDR<br>R               | 2.14 | 1,570.75 |
| ATP | 6011 | Canx<br>protein                                                                                                                                                                                                                                                                      | gi 1572791<br>43,gi 15778<br>5567                                                                                                                                                     | 67,759.10 | 100.00% | 6 | 10 | 18 | 0.20% | 11.10% | APVPTG<br>EVYFAD<br>SFDR            | 3.95 | 1,770.83 |
| ATP | 6011 | Canx<br>protein                                                                                                                                                                                                                                                                      | gi 1572791<br>43,gi 15778<br>5567                                                                                                                                                     | 67,759.10 | 100.00% | 6 | 10 | 18 | 0.20% | 11.10% | KIPNPDF<br>FEDLEPF<br>K             | 5.69 | 1,835.92 |
| ATP | 6011 | Canx<br>protein                                                                                                                                                                                                                                                                      | gi 1572791<br>43,gi 15778<br>5567                                                                                                                                                     | 67,759.10 | 100.00% | 6 | 10 | 18 | 0.20% | 11.10% | LPGDKG<br>LVLMSR                    | 2.09 | 1,301.72 |
| ATP | 6011 | Canx<br>protein                                                                                                                                                                                                                                                                      | gi 1572791<br>43,gi 15778<br>5567                                                                                                                                                     | 67,759.10 | 100.00% | 6 | 10 | 18 | 0.20% | 11.10% | TPELNL<br>DQFHDK                    | 3.34 | 1,456.71 |
| ATP | 6011 | Canx<br>protein                                                                                                                                                                                                                                                                      | gi 1572791<br>43,gi 15778<br>5567                                                                                                                                                     | 67,759.10 | 100.00% | 6 | 10 | 18 | 0.20% | 11.10% | TPELNL<br>DQFHDK<br>TPYTIMF<br>GPKD | 4.38 | 2,723.30 |

|     |      |                                                  |                                        |            |         |    |    |    |       |        |                                           |          |
|-----|------|--------------------------------------------------|----------------------------------------|------------|---------|----|----|----|-------|--------|-------------------------------------------|----------|
| ATP | 6011 | Canx protein                                     | gi 157279143,gi 157785567              | 67,759.10  | 100.00% | 6  | 10 | 18 | 0.20% | 11.10% | TPYTIMF 3.58<br>GPDK                      | 1,285.61 |
| ATP | 6011 | Nucleobindin 1                                   | gi 112362164,gi 115497814,gi 122142168 | 54,964.80  | 100.00% | 9  | 10 | 17 | 0.19% | 29.10% | AKMDA 2.44<br>QQEPNIQ<br>LDHLNL<br>LK     | 2,335.21 |
| ATP | 6011 | Nucleobindin 1                                   | gi 112362164,gi 115497814,gi 122142168 | 54,964.80  | 100.00% | 9  | 10 | 17 | 0.19% | 29.10% | DLELLIQ 2.97<br>TATR                      | 1,272.72 |
| ATP | 6011 | Nucleobindin 1                                   | gi 112362164,gi 115497814,gi 122142168 | 54,964.80  | 100.00% | 9  | 10 | 17 | 0.19% | 29.10% | ELQQAV 3.47<br>LQMEQR                     | 1,488.75 |
| ATP | 6011 | Nucleobindin 1                                   | gi 112362164,gi 115497814,gi 122142168 | 54,964.80  | 100.00% | 9  | 10 | 17 | 0.19% | 29.10% | KQQQQS 3.3<br>HNNPAP<br>GPEGQL<br>K       | 2,086.04 |
| ATP | 6011 | Nucleobindin 1                                   | gi 112362164,gi 115497814,gi 122142168 | 54,964.80  | 100.00% | 9  | 10 | 17 | 0.19% | 29.10% | LVTLEEF 2.79<br>LASTQR                    | 1,506.82 |
| ATP | 6011 | Nucleobindin 1                                   | gi 112362164,gi 115497814,gi 122142168 | 54,964.80  | 100.00% | 9  | 10 | 17 | 0.19% | 29.10% | TFFILHDI 3.8<br>NSDGVL<br>DEQELE<br>ALFTK | 2,894.45 |
| ATP | 6011 | Nucleobindin 1                                   | gi 112362164,gi 115497814,gi 122142168 | 54,964.80  | 100.00% | 9  | 10 | 17 | 0.19% | 29.10% | VNVPGS 2.62<br>QAQLK                      | 1,140.64 |
| ATP | 6011 | Nucleobindin 1                                   | gi 112362164,gi 115497814,gi 122142168 | 54,964.80  | 100.00% | 9  | 10 | 17 | 0.19% | 29.10% | YLESLG 3.28<br>EEQRK                      | 1,351.69 |
| ATP | 6011 | Nucleobindin 1                                   | gi 112362164,gi 115497814,gi 122142168 | 54,964.80  | 100.00% | 9  | 10 | 17 | 0.19% | 29.10% | YLQEVI 3.62<br>NVLETD<br>GHFR             | 1,932.98 |
| ATP | 6011 | nicalin                                          | gi 115494944,gi 94534903               | 63,091.10  | 99.80%  | 2  | 2  | 2  | 0.02% | 6.23%  | AAQLVD 6<br>KDGTF<br>STLEHY<br>LSR        | 2,364.22 |
| ATP | 6011 | nicalin                                          | gi 115494944,gi 94534903               | 63,091.10  | 99.80%  | 2  | 2  | 2  | 0.02% | 6.23%  | MQQYDL 4.57<br>QGQPYG<br>TR               | 1,700.77 |
| ATP | 6011 | embryo-specific fibronectin 1 transcript variant | gi 220028657,gi 76610126               | 262,401.30 | 100.00% | 21 | 25 | 29 | 0.32% | 16.00% | DDKESV 3.03<br>PISDTIIP<br>AVPPPT<br>DLR  | 2,475.30 |
| ATP | 6011 | embryo-specific fibronectin 1 transcript variant | gi 220028657,gi 76610126               | 262,401.30 | 100.00% | 21 | 25 | 29 | 0.32% | 16.00% | DLQFVE 3.46<br>VTDVK                      | 1,292.67 |
| ATP | 6011 | embryo-specific fibronectin 1 transcript variant | gi 220028657,gi 76610126               | 262,401.30 | 100.00% | 21 | 25 | 29 | 0.32% | 16.00% | EINLAPD 4.47<br>SSSVVV<br>SGLMVA<br>TK    | 2,133.11 |
| ATP | 6011 | embryo-specific fibronectin 1 transcript variant | gi 220028657,gi 76610126               | 262,401.30 | 100.00% | 21 | 25 | 29 | 0.32% | 16.00% | GATYNII 3.27<br>VEAVK                     | 1,277.71 |

|     |      |                                                  |                          |            |         |    |    |    |       |        |                                      |      |          |
|-----|------|--------------------------------------------------|--------------------------|------------|---------|----|----|----|-------|--------|--------------------------------------|------|----------|
| ATP | 6011 | embryo-specific fibronectin 1 transcript variant | gi 220028657,gi 76610126 | 262,401.30 | 100.00% | 21 | 25 | 29 | 0.32% | 16.00% | GDSPAS<br>SKPVSIN<br>YR              | 4.1  | 1,577.79 |
| ATP | 6011 | embryo-specific fibronectin 1 transcript variant | gi 220028657,gi 76610126 | 262,401.30 | 100.00% | 21 | 25 | 29 | 0.32% | 16.00% | GLAFTD<br>VDVDSI<br>K                | 3.06 | 1,379.71 |
| ATP | 6011 | embryo-specific fibronectin 1 transcript variant | gi 220028657,gi 76610126 | 262,401.30 | 100.00% | 21 | 25 | 29 | 0.32% | 16.00% | GLRPGV<br>VYEGQL<br>ISVQHY<br>GQR    | 5.16 | 2,356.25 |
| ATP | 6011 | embryo-specific fibronectin 1 transcript variant | gi 220028657,gi 76610126 | 262,401.30 | 100.00% | 21 | 25 | 29 | 0.32% | 16.00% | NLQPGS<br>EYAVSL<br>VAVK             | 4.54 | 1,674.91 |
| ATP | 6011 | embryo-specific fibronectin 1 transcript variant | gi 220028657,gi 76610126 | 262,401.30 | 100.00% | 21 | 25 | 29 | 0.32% | 16.00% | NSITLTN<br>LNPSTE<br>YVVSIV<br>ALNSK | 4.03 | 2,547.37 |
| ATP | 6011 | embryo-specific fibronectin 1 transcript variant | gi 220028657,gi 76610126 | 262,401.30 | 100.00% | 21 | 25 | 29 | 0.32% | 16.00% | NTFAEV<br>TGLSPG<br>VTYHFK           | 4.83 | 1,967.99 |
| ATP | 6011 | embryo-specific fibronectin 1 transcript variant | gi 220028657,gi 76610126 | 262,401.30 | 100.00% | 21 | 25 | 29 | 0.32% | 16.00% | QYNVGP<br>AASQYP<br>LR               | 3.86 | 1,563.79 |
| ATP | 6011 | embryo-specific fibronectin 1 transcript variant | gi 220028657,gi 76610126 | 262,401.30 | 100.00% | 21 | 25 | 29 | 0.32% | 16.00% | RPGAEP<br>GNEGST<br>AHSYNQ<br>YSQR   | 5.11 | 2,406.08 |
| ATP | 6011 | embryo-specific fibronectin 1 transcript variant | gi 220028657,gi 76610126 | 262,401.30 | 100.00% | 21 | 25 | 29 | 0.32% | 16.00% | SSPVVID<br>ASTAIDA<br>PSNLR          | 3.71 | 1,913.00 |
| ATP | 6011 | embryo-specific fibronectin 1 transcript variant | gi 220028657,gi 76610126 | 262,401.30 | 100.00% | 21 | 25 | 29 | 0.32% | 16.00% | STATISG<br>LKPGVD<br>YTITVY<br>AVTGR | 3.5  | 2,470.32 |
| ATP | 6011 | embryo-specific fibronectin 1 transcript variant | gi 220028657,gi 76610126 | 262,401.30 | 100.00% | 21 | 25 | 29 | 0.32% | 16.00% | SYTITGL<br>QPGTDY<br>K               | 3.8  | 1,543.76 |

|     |      |                                                  |                                       |            |         |    |    |    |       |        |                                                                  |      |          |
|-----|------|--------------------------------------------------|---------------------------------------|------------|---------|----|----|----|-------|--------|------------------------------------------------------------------|------|----------|
| ATP | 6011 | embryo-specific fibronectin 1 transcript variant | gi 220028657,gi 76610126              | 262,401.30 | 100.00% | 21 | 25 | 29 | 0.32% | 16.00% | TEIDKPS<br>QMQVT<br>DVQDNS<br>ISVR                               | 6.16 | 2,506.21 |
| ATP | 6011 | embryo-specific fibronectin 1 transcript variant | gi 220028657,gi 76610126              | 262,401.30 | 100.00% | 21 | 25 | 29 | 0.32% | 16.00% | TETITGF<br>QVDAIP<br>ANGQTPI<br>QR                               | 3.53 | 2,357.21 |
| ATP | 6011 | embryo-specific fibronectin 1 transcript variant | gi 220028657,gi 76610126              | 262,401.30 | 100.00% | 21 | 25 | 29 | 0.32% | 16.00% | TKTETIT<br>GFQVDA<br>IPANGQT<br>PIQR                             | 3.51 | 2,586.35 |
| ATP | 6011 | embryo-specific fibronectin 1 transcript variant | gi 220028657,gi 76610126              | 262,401.30 | 100.00% | 21 | 25 | 29 | 0.32% | 16.00% | TPFITNP<br>GYDTGN<br>GIQLPGT<br>SGQQPS<br>LGQQMI<br>FEEHGF<br>RR | 3.16 | 4,392.11 |
| ATP | 6011 | embryo-specific fibronectin 1 transcript variant | gi 220028657,gi 76610126              | 262,401.30 | 100.00% | 21 | 25 | 29 | 0.32% | 16.00% | VDVIPV<br>NLPGEH<br>GQR                                          | 2.52 | 1,629.87 |
| ATP | 6011 | embryo-specific fibronectin 1 transcript variant | gi 220028657,gi 76610126              | 262,401.30 | 100.00% | 21 | 25 | 29 | 0.32% | 16.00% | VPGTSA<br>SATLTG<br>LTR                                          | 4.64 | 1,431.78 |
| ATP | 6011 | translocation of outer mitochondrial membrane 40 | gi 115495635,gi 122134275,gi 94534905 | 37,707.00  | 100.00% | 4  | 6  | 10 | 0.11% | 22.70% | KLPLPL<br>TLALGA<br>FLNHR                                        | 3.45 | 1,971.19 |
| ATP | 6011 | translocation of outer mitochondrial membrane 40 | gi 115495635,gi 122134275,gi 94534905 | 37,707.00  | 100.00% | 4  | 6  | 10 | 0.11% | 22.70% | MQDTSV<br>SFGYQL<br>DLPK                                         | 3.94 | 1,844.87 |
| ATP | 6011 | translocation of outer mitochondrial membrane 40 | gi 115495635,gi 122134275,gi 94534905 | 37,707.00  | 100.00% | 4  | 6  | 10 | 0.11% | 22.70% | QLSPTEA<br>FPVLVG<br>DMDNSG<br>SLNAQVI<br>HQLPG<br>LR            | 4.32 | 3,576.81 |
| ATP | 6011 | translocation of outer mitochondrial membrane 40 | gi 115495635,gi 122134275,gi 94534905 | 37,707.00  | 100.00% | 4  | 6  | 10 | 0.11% | 22.70% | RPGEEG<br>AVMSLA<br>GK                                           | 3.06 | 1,417.71 |

|     |      |                                                                    |                                                                                                 |            |         |   |   |    |       |        |                                |          |
|-----|------|--------------------------------------------------------------------|-------------------------------------------------------------------------------------------------|------------|---------|---|---|----|-------|--------|--------------------------------|----------|
| ATP | 6011 | PREDIC TED: ATPase, Ca++ transporting, plasma membrane 4 isoform 5 | gi 1199080 26                                                                                   | 133,777.70 | 100.00% | 4 | 4 | 4  | 0.04% | 5.30%  | KADVGF 3.28<br>AMGIAG<br>TDVAK | 1,666.85 |
| ATP | 6011 | PREDIC TED: ATPase, Ca++ transporting, plasma membrane 4 isoform 5 | gi 1199080 26                                                                                   | 133,777.70 | 100.00% | 4 | 4 | 4  | 0.04% | 5.30%  | QVVAVT 4.91<br>GDGTND<br>GPALK | 1,641.84 |
| ATP | 6011 | PREDIC TED: ATPase, Ca++ transporting, plasma membrane 4 isoform 5 | gi 1199080 26                                                                                   | 133,777.70 | 100.00% | 4 | 4 | 4  | 0.04% | 5.30%  | TNPVEG 2.95<br>LSGNPA<br>DLEK  | 1,640.81 |
| ATP | 6011 | PREDIC TED: ATPase, Ca++ transporting, plasma membrane 4 isoform 5 | gi 1199080 26                                                                                   | 133,777.70 | 100.00% | 4 | 4 | 4  | 0.04% | 5.30%  | TPLLDE 3.6<br>QEEEIFE<br>K     | 1,719.83 |
| ATP | 6011 | PREDIC TED: similar to histone H2aj cluster 1,                     | gi 1199155 59,gi 11991 5725,gi 119 939855,gi 1 98282091,gi 1 76619954,gi 7663126 9,gi 766335 42 | 14,074.00  | 100.00% | 6 | 8 | 29 | 0.32% | 35.40% | AGLQFP 3.25<br>VGR             | 944.5313 |
| ATP | 6011 | PREDIC TED: similar to histone H2aj cluster 1,                     | gi 1199155 59,gi 11991 5725,gi 119 939855,gi 1 98282091,gi 1 76619954,gi 7663126 9,gi 766335 42 | 14,074.00  | 100.00% | 6 | 8 | 29 | 0.32% | 35.40% | HLQLAIR 2.59                   | 850.5258 |
| ATP | 6011 | PREDIC TED: similar to histone H2aj cluster 1,                     | gi 1199155 59,gi 11991 5725,gi 119 939855,gi 1 98282091,gi 1 76619954,gi 7663126 9,gi 766335 42 | 14,074.00  | 100.00% | 6 | 8 | 29 | 0.32% | 35.40% | HLQLAIR 2.61<br>NDEELN<br>K    | 1,692.90 |

|     |      |                                                |                                                                                         |           |         |   |   |    |       |        |                                  |          |
|-----|------|------------------------------------------------|-----------------------------------------------------------------------------------------|-----------|---------|---|---|----|-------|--------|----------------------------------|----------|
| ATP | 6011 | PREDIC TED: similar to histone cluster 1, H2aj | gi 119915559,gi 119915725,gi 119939855,gi 198282091,gi 76619954,gi 76631269,gi 76633542 | 14,074.00 | 100.00% | 6 | 8 | 29 | 0.32% | 35.40% | HLQLAIR 2.73<br>NDEELN<br>KLLGK  | 2,104.19 |
| ATP | 6011 | PREDIC TED: similar to histone cluster 1, H2aj | gi 119915559,gi 119915725,gi 119939855,gi 198282091,gi 76619954,gi 76631269,gi 76633542 | 14,074.00 | 100.00% | 6 | 8 | 29 | 0.32% | 35.40% | NDEELN 3.86<br>KLLGK             | 1,272.68 |
| ATP | 6011 | PREDIC TED: similar to histone cluster 1, H2aj | gi 119915559,gi 119915725,gi 119939855,gi 198282091,gi 76619954,gi 76631269,gi 76633542 | 14,074.00 | 100.00% | 6 | 8 | 29 | 0.32% | 35.40% | VTIAQG 5.09<br>GVLPNIQ<br>AVLLPK | 1,931.17 |
| ATP | 6011 | cpn10 protein                                  | gi 1167,gi 27805927,gi 47606334,gi 74354139                                             | 10,913.70 | 99.80%  | 2 | 2 | 2  | 0.02% | 25.50% | VLQATV 3.31<br>VAVGSG<br>SK      | 1,315.76 |
| ATP | 6011 | cpn10 protein                                  | gi 1167,gi 27805927,gi 47606334,gi 74354139                                             | 10,913.70 | 99.80%  | 2 | 2 | 2  | 0.02% | 25.50% | VVLDDK 2.43<br>DYFLFR            | 1,529.80 |
| ATP | 6011 | Plexin domain containin g 2                    | gi 117306639,gi 118150958                                                               | 59,450.20 | 100.00% | 3 | 3 | 3  | 0.03% | 8.29%  | EIPVLVT 4.83<br>QISSTNH<br>PVK   | 1,862.04 |
| ATP | 6011 | Plexin domain containin g 2                    | gi 117306639,gi 118150958                                                               | 59,450.20 | 100.00% | 3 | 3 | 3  | 0.03% | 8.29%  | VGLSDA 4.56<br>FVVVHR            | 1,298.72 |
| ATP | 6011 | Plexin domain containin g 2                    | gi 117306639,gi 118150958                                                               | 59,450.20 | 100.00% | 3 | 3 | 3  | 0.03% | 8.29%  | VNLSFD 3.2<br>FPFYGHF<br>LR      | 1,858.93 |

|     |      |                                                                                                                                                                                                                                                                                                                                                               |           |         |    |    |    |       |        |                                                       |          |
|-----|------|---------------------------------------------------------------------------------------------------------------------------------------------------------------------------------------------------------------------------------------------------------------------------------------------------------------------------------------------------------------|-----------|---------|----|----|----|-------|--------|-------------------------------------------------------|----------|
| ATP | 6011 | RecName gi 1221402<br>: 31.gi 14623<br>Full=Doli 1756.gi 742<br>chyl- 67729.gi 77<br>diphosph 736155<br>ooligosac<br>charide--<br>protein<br>glycosyltr<br>ansferase<br>subunit<br>2;<br>AltName:<br>Full=Doli<br>chyl-<br>diphosph<br>ooligosac<br>charide--<br>protein<br>glycosyltr<br>ansferase<br>63 kDa<br>subunit;<br>AltName:<br>Full=Rib<br>ophorin- | 69,197.20 | 100.00% | 15 | 21 | 30 | 0.33% | 39.10% | ASLDRPF 4.71<br>TSLESFAF<br>YSIVGLS<br>SLGAQV<br>PDVK | 3,254.69 |
| ATP | 6011 | RecName gi 1221402<br>: 31.gi 14623<br>Full=Doli 1756.gi 742<br>chyl- 67729.gi 77<br>diphosph 736155<br>ooligosac<br>charide--<br>protein<br>glycosyltr<br>ansferase<br>subunit<br>2;<br>AltName:<br>Full=Doli<br>chyl-<br>diphosph<br>ooligosac<br>charide--<br>protein<br>glycosyltr<br>ansferase<br>63 kDa<br>subunit;<br>AltName:<br>Full=Rib<br>ophorin- | 69,197.20 | 100.00% | 15 | 21 | 30 | 0.33% | 39.10% | EETVLA 3<br>TVQALQ<br>TASYLS<br>QQADLR                | 2,635.36 |



|     |      |                                                                                                                                                                                                                                                                                                                                                            |           |         |    |    |    |       |        |                      |          |
|-----|------|------------------------------------------------------------------------------------------------------------------------------------------------------------------------------------------------------------------------------------------------------------------------------------------------------------------------------------------------------------|-----------|---------|----|----|----|-------|--------|----------------------|----------|
| ATP | 6011 | RecName gi 1221402 : 31.gi 14623<br>Full=Doli 1756.gi 742<br>chyl- 67729.gi 77<br>diphosph 736155<br>ooligosac<br>charide--<br>protein<br>glycosyltr<br>ansferase<br>subunit<br>2;<br>AltName:<br>Full=Doli<br>chyl-<br>diphosph<br>ooligosac<br>charide--<br>protein<br>glycosyltr<br>ansferase<br>63 kDa<br>subunit;<br>AltName:<br>Full=Rib<br>ophorin- | 69,197.20 | 100.00% | 15 | 21 | 30 | 0.33% | 39.10% | FELDTSE 2.42<br>R    | 996.4633 |
| ATP | 6011 | RecName gi 1221402 : 31.gi 14623<br>Full=Doli 1756.gi 742<br>chyl- 67729.gi 77<br>diphosph 736155<br>ooligosac<br>charide--<br>protein<br>glycosyltr<br>ansferase<br>subunit<br>2;<br>AltName:<br>Full=Doli<br>chyl-<br>diphosph<br>ooligosac<br>charide--<br>protein<br>glycosyltr<br>ansferase<br>63 kDa<br>subunit;<br>AltName:<br>Full=Rib<br>ophorin- | 69,197.20 | 100.00% | 15 | 21 | 30 | 0.33% | 39.10% | FSSGYY 3.53<br>DFSVK | 1,299.59 |

|     |      |                                                                                                                                                                                                                                                                                                                 |           |         |    |    |    |       |        |                                      |      |          |
|-----|------|-----------------------------------------------------------------------------------------------------------------------------------------------------------------------------------------------------------------------------------------------------------------------------------------------------------------|-----------|---------|----|----|----|-------|--------|--------------------------------------|------|----------|
| ATP | 6011 | RecName gi 1221402 :<br>Full=Doli<br>chyl-<br>diphosph<br>ooligosac<br>charide--<br>protein<br>glycosyltr<br>ansferase<br>subunit<br>2;<br>AltName:<br>Full=Doli<br>chyl-<br>diphosph<br>ooligosac<br>charide--<br>protein<br>glycosyltr<br>ansferase<br>63 kDa<br>subunit;<br>AltName:<br>Full=Rib<br>ophorin- | 69,197.20 | 100.00% | 15 | 21 | 30 | 0.33% | 39.10% | ISTEVGI<br>TNVDLS<br>TVDKDQ<br>SIAPK | 5.37 | 2,530.33 |
| ATP | 6011 | RecName gi 1221402 :<br>Full=Doli<br>chyl-<br>diphosph<br>ooligosac<br>charide--<br>protein<br>glycosyltr<br>ansferase<br>subunit<br>2;<br>AltName:<br>Full=Doli<br>chyl-<br>diphosph<br>ooligosac<br>charide--<br>protein<br>glycosyltr<br>ansferase<br>63 kDa<br>subunit;<br>AltName:<br>Full=Rib<br>ophorin- | 69,197.20 | 100.00% | 15 | 21 | 30 | 0.33% | 39.10% | KNFESLS<br>EAFSVA<br>SAAAAL<br>SENR  | 3.36 | 2,399.18 |

|     |      |                                                                                                                                                                                                                                                                                                                                                               |           |         |    |    |    |       |        |                                                 |          |
|-----|------|---------------------------------------------------------------------------------------------------------------------------------------------------------------------------------------------------------------------------------------------------------------------------------------------------------------------------------------------------------------|-----------|---------|----|----|----|-------|--------|-------------------------------------------------|----------|
| ATP | 6011 | RecName gi 1221402<br>: 31.gi 14623<br>Full=Doli 1756.gi 742<br>chyl- 67729.gi 77<br>diphosph 736155<br>ooligosac<br>charide--<br>protein<br>glycosyltr<br>ansferase<br>subunit<br>2;<br>AltName:<br>Full=Doli<br>chyl-<br>diphosph<br>ooligosac<br>charide--<br>protein<br>glycosyltr<br>ansferase<br>63 kDa<br>subunit;<br>AltName:<br>Full=Rib<br>ophorin- | 69,197.20 | 100.00% | 15 | 21 | 30 | 0.33% | 39.10% | LDELGG 3.7<br>VYLQFE<br>EGLETT<br>ALFVAA<br>TYK | 2,977.51 |
| ATP | 6011 | RecName gi 1221402<br>: 31.gi 14623<br>Full=Doli 1756.gi 742<br>chyl- 67729.gi 77<br>diphosph 736155<br>ooligosac<br>charide--<br>protein<br>glycosyltr<br>ansferase<br>subunit<br>2;<br>AltName:<br>Full=Doli<br>chyl-<br>diphosph<br>ooligosac<br>charide--<br>protein<br>glycosyltr<br>ansferase<br>63 kDa<br>subunit;<br>AltName:<br>Full=Rib<br>ophorin- | 69,197.20 | 100.00% | 15 | 21 | 30 | 0.33% | 39.10% | LMDHVG 3.18<br>TEPSIKE<br>DQVIQL<br>MNAIFS<br>K | 2,959.49 |

|     |      |                                                                                                                                                                                                                                                                                                                    |           |         |    |    |    |       |        |                                                  |          |
|-----|------|--------------------------------------------------------------------------------------------------------------------------------------------------------------------------------------------------------------------------------------------------------------------------------------------------------------------|-----------|---------|----|----|----|-------|--------|--------------------------------------------------|----------|
| ATP | 6011 | RecName gi 1221402<br>:<br>Full=Doli<br>chyl-<br>diphosph<br>ooligosac<br>charide--<br>protein<br>glycosyltr<br>ansferase<br>subunit<br>2;<br>AltName:<br>Full=Doli<br>chyl-<br>diphosph<br>ooligosac<br>charide--<br>protein<br>glycosyltr<br>ansferase<br>63 kDa<br>subunit;<br>AltName:<br>Full=Rib<br>ophorin- | 69,197.20 | 100.00% | 15 | 21 | 30 | 0.33% | 39.10% | LQVTNV 4.97<br>LSQPLTQ<br>ATVK                   | 1,840.05 |
| ATP | 6011 | RecName gi 1221402<br>:<br>Full=Doli<br>chyl-<br>diphosph<br>ooligosac<br>charide--<br>protein<br>glycosyltr<br>ansferase<br>subunit<br>2;<br>AltName:<br>Full=Doli<br>chyl-<br>diphosph<br>ooligosac<br>charide--<br>protein<br>glycosyltr<br>ansferase<br>63 kDa<br>subunit;<br>AltName:<br>Full=Rib<br>ophorin- | 69,197.20 | 100.00% | 15 | 21 | 30 | 0.33% | 39.10% | LSKEET 5.76<br>VLATVQ<br>ALQTAS<br>YLSQQA<br>DLR | 2,963.57 |

|     |      |                                                                                                                                                                                                                                                                                                                 |           |         |    |    |    |       |        |                                    |      |          |
|-----|------|-----------------------------------------------------------------------------------------------------------------------------------------------------------------------------------------------------------------------------------------------------------------------------------------------------------------|-----------|---------|----|----|----|-------|--------|------------------------------------|------|----------|
| ATP | 6011 | RecName gi 1221402 :<br>Full=Doli<br>chyl-<br>diphosph<br>ooligosac<br>charide--<br>protein<br>glycosyltr<br>ansferase<br>subunit<br>2;<br>AltName:<br>Full=Doli<br>chyl-<br>diphosph<br>ooligosac<br>charide--<br>protein<br>glycosyltr<br>ansferase<br>63 kDa<br>subunit;<br>AltName:<br>Full=Rib<br>ophorin- | 69,197.20 | 100.00% | 15 | 21 | 30 | 0.33% | 39.10% | NFESLSE<br>AFSVAS<br>AAAALS<br>ENR | 3.55 | 2,271.09 |
| ATP | 6011 | RecName gi 1221402 :<br>Full=Doli<br>chyl-<br>diphosph<br>ooligosac<br>charide--<br>protein<br>glycosyltr<br>ansferase<br>subunit<br>2;<br>AltName:<br>Full=Doli<br>chyl-<br>diphosph<br>ooligosac<br>charide--<br>protein<br>glycosyltr<br>ansferase<br>63 kDa<br>subunit;<br>AltName:<br>Full=Rib<br>ophorin- | 69,197.20 | 100.00% | 15 | 21 | 30 | 0.33% | 39.10% | SIVEEIE<br>DLVAR                   | 4    | 1,372.73 |

|     |      |                                                                                                                                                                                                                                                                                                                                                               |           |         |    |    |    |       |        |                                                   |          |
|-----|------|---------------------------------------------------------------------------------------------------------------------------------------------------------------------------------------------------------------------------------------------------------------------------------------------------------------------------------------------------------------|-----------|---------|----|----|----|-------|--------|---------------------------------------------------|----------|
| ATP | 6011 | RecName gi 1221402<br>: 31.gi 14623<br>Full=Doli 1756.gi 742<br>chyl- 67729.gi 77<br>diphosph 736155<br>ooligosac<br>charide--<br>protein<br>glycosyltr<br>ansferase<br>subunit<br>2;<br>AltName:<br>Full=Doli<br>chyl-<br>diphosph<br>ooligosac<br>charide--<br>protein<br>glycosyltr<br>ansferase<br>63 kDa<br>subunit;<br>AltName:<br>Full=Rib<br>ophorin- | 69,197.20 | 100.00% | 15 | 21 | 30 | 0.33% | 39.10% | TGQEVV 3.63<br>FVAEPD<br>SK                       | 1,505.75 |
| ATP | 6011 | RecName gi 1221402<br>: 31.gi 14623<br>Full=Doli 1756.gi 742<br>chyl- 67729.gi 77<br>diphosph 736155<br>ooligosac<br>charide--<br>protein<br>glycosyltr<br>ansferase<br>subunit<br>2;<br>AltName:<br>Full=Doli<br>chyl-<br>diphosph<br>ooligosac<br>charide--<br>protein<br>glycosyltr<br>ansferase<br>63 kDa<br>subunit;<br>AltName:<br>Full=Rib<br>ophorin- | 69,197.20 | 100.00% | 15 | 21 | 30 | 0.33% | 39.10% | TSFTLIG 2.35<br>DVFELN<br>FMNVKF<br>SSGYD<br>FSVK | 3,355.62 |

|     |      |                                                                                                                                                                                                                                                                                                                 |                                                  |           |         |    |    |    |       |        |                                                               |      |          |
|-----|------|-----------------------------------------------------------------------------------------------------------------------------------------------------------------------------------------------------------------------------------------------------------------------------------------------------------------|--------------------------------------------------|-----------|---------|----|----|----|-------|--------|---------------------------------------------------------------|------|----------|
| ATP | 6011 | RecName gi 1221402 :<br>Full=Doli<br>chyl-<br>diphosph<br>ooligosac<br>charide--<br>protein<br>glycosyltr<br>ansferase<br>subunit<br>2;<br>AltName:<br>Full=Doli<br>chyl-<br>diphosph<br>ooligosac<br>charide--<br>protein<br>glycosyltr<br>ansferase<br>63 kDa<br>subunit;<br>AltName:<br>Full=Rib<br>ophorin- | gi 14623<br>1756,gi 742<br>67729,gi 77<br>736155 | 69,197.20 | 100.00% | 15 | 21 | 30 | 0.33% | 39.10% | YIANTV<br>ELR                                                 | 3.23 | 1,078.59 |
| ATP | 6011 | RecName gi 1173072 :<br>Full=60S<br>acidic<br>ribosomal<br>protein<br>P2                                                                                                                                                                                                                                        | gi 2780752<br>3,gi 600177<br>.gi 8257175<br>5    | 11,684.40 | 100.00% | 6  | 7  | 7  | 0.08% | 73.90% | ILDSVGI<br>EADDDR<br>LNK                                      | 5.1  | 1,772.90 |
| ATP | 6011 | RecName gi 1173072 :<br>Full=60S<br>acidic<br>ribosomal<br>protein<br>P2                                                                                                                                                                                                                                        | gi 2780752<br>3,gi 600177<br>.gi 8257175<br>5    | 11,684.40 | 100.00% | 6  | 7  | 7  | 0.08% | 73.90% | KILDSVG<br>IEADDD<br>RLNK                                     | 3.02 | 1,901.00 |
| ATP | 6011 | RecName gi 1173072 :<br>Full=60S<br>acidic<br>ribosomal<br>protein<br>P2                                                                                                                                                                                                                                        | gi 2780752<br>3,gi 600177<br>.gi 8257175<br>5    | 11,684.40 | 100.00% | 6  | 7  | 7  | 0.08% | 73.90% | LASVPA<br>GGAVAV<br>SAAPGS<br>AAPAAG<br>SAPAAA<br>EEK         | 3.49 | 2,774.43 |
| ATP | 6011 | RecName gi 1173072 :<br>Full=60S<br>acidic<br>ribosomal<br>protein<br>P2                                                                                                                                                                                                                                        | gi 2780752<br>3,gi 600177<br>.gi 8257175<br>5    | 11,684.40 | 100.00% | 6  | 7  | 7  | 0.08% | 73.90% | LASVPA<br>GGAVAV<br>SAAPGS<br>AAPAAG<br>SAPAAA<br>EEKKEE<br>K | 3.69 | 3,288.71 |
| ATP | 6011 | RecName gi 1173072 :<br>Full=60S<br>acidic<br>ribosomal<br>protein<br>P2                                                                                                                                                                                                                                        | gi 2780752<br>3,gi 600177<br>.gi 8257175<br>5    | 11,684.40 | 100.00% | 6  | 7  | 7  | 0.08% | 73.90% | NIEDVIA<br>QGIGK                                              | 3.66 | 1,256.68 |
| ATP | 6011 | RecName gi 1173072 :<br>Full=60S<br>acidic<br>ribosomal<br>protein<br>P2                                                                                                                                                                                                                                        | gi 2780752<br>3,gi 600177<br>.gi 8257175<br>5    | 11,684.40 | 100.00% | 6  | 7  | 7  | 0.08% | 73.90% | YVASYL<br>LAALGG<br>NSSPSA<br>K                               | 4.59 | 1,868.98 |

|     |      |                                                                                                                                                                                |            |           |        |   |   |   |       |       |                                |          |
|-----|------|--------------------------------------------------------------------------------------------------------------------------------------------------------------------------------|------------|-----------|--------|---|---|---|-------|-------|--------------------------------|----------|
| ATP | 6011 | PREDIC TED: 34<br>similar to Calcium-binding mitochondrial carrier protein Aralar2 (Mitochondrial aspartate glutamate carrier 2) (Solute carrier family 25 member 13) (Citrin) | gi 1198907 | 74,177.70 | 99.80% | 2 | 3 | 3 | 0.03% | 7.70% | GLLPQLL 2.35<br>GVAPEK         | 1,334.80 |
| ATP | 6011 | PREDIC TED: 34<br>similar to Calcium-binding mitochondrial carrier protein Aralar2 (Mitochondrial aspartate glutamate carrier 2) (Solute carrier family 25 member 13) (Citrin) | gi 1198907 | 74,177.70 | 99.80% | 2 | 3 | 3 | 0.03% | 7.70% | IAPLEEG 3.8<br>TLPFNLA<br>EAQR | 1,969.04 |
| ATP | 6011 | PREDIC TED: 34<br>similar to Calcium-binding mitochondrial carrier protein Aralar2 (Mitochondrial aspartate glutamate carrier 2) (Solute carrier family 25 member 13) (Citrin) | gi 1198907 | 74,177.70 | 99.80% | 2 | 3 | 3 | 0.03% | 7.70% | LTVNDF 2.32<br>VR              | 963.5258 |



|     |      |                                                                                                                                                                                             |                                                    |           |         |   |   |   |       |        |                              |          |
|-----|------|---------------------------------------------------------------------------------------------------------------------------------------------------------------------------------------------|----------------------------------------------------|-----------|---------|---|---|---|-------|--------|------------------------------|----------|
| ATP | 6011 | PREDIC TED: 34<br>similar to Calcium-binding mitochondrial carrier protein Aralar2 (Mitochondrial aspartate glutamate carrier 2) (Solute carrier family 25 member 13) (Citrin)              | gi 1198907                                         | 74,177.70 | 99.80%  | 2 | 3 | 3 | 0.03% | 7.70%  | YLNIFGE 4<br>SQPNPK          | 1,506.76 |
| ATP | 6011 | RecName : Full=Dna J homolog subfamily B member 11; AltName: Full=ER-associate d dnaJ protein 3; AltName: Full=ERj 3p; AltName: Full=ERd j3; AltName: Full=ER-associate d Hsp40 co-chaperon | gi 1221407<br>: 49.gi 73587<br>163.gi 7773<br>5491 | 40,486.60 | 100.00% | 3 | 3 | 3 | 0.03% | 18.40% | FQDLGA 2.83<br>AYEVL<br>DSEK | 1,771.84 |

|     |      |                                                                                                                                                                                                                                     |           |         |   |   |   |       |        |                                               |          |
|-----|------|-------------------------------------------------------------------------------------------------------------------------------------------------------------------------------------------------------------------------------------|-----------|---------|---|---|---|-------|--------|-----------------------------------------------|----------|
| ATP | 6011 | RecName gi 1221407 : 49,gi 73587 Full=Dna 163,gi 7773 J 5491 homolog subfamily B member 11; AltName: Full=ER-associate d dnaJ protein 3; AltName: Full=ERj 3p; AltName: Full=ERd j3; AltName: Full=ER-associate d Hsp40 co-chaperon | 40,486.60 | 100.00% | 3 | 3 | 3 | 0.03% | 18.40% | FQMTQE 3.21 VVCDEC PNVK                       | 1,885.81 |
| ATP | 6011 | RecName gi 1221407 : 49,gi 73587 Full=Dna 163,gi 7773 J 5491 homolog subfamily B member 11; AltName: Full=ER-associate d dnaJ protein 3; AltName: Full=ERj 3p; AltName: Full=ERd j3; AltName: Full=ER-associate d Hsp40 co-chaperon | 40,486.60 | 100.00% | 3 | 3 | 3 | 0.03% | 18.40% | TLEVEIE 3.63 PGVRDG MEYPPFIG EGEPHV DGEPGD LR | 3,754.75 |
| ATP | 6011 | FXDYD domain containin g ion transport regulator 6 gi 7577507 0,gi 777357 53,gi 91206 665                                                                                                                                           | 10,447.10 | 99.80%  | 2 | 2 | 2 | 0.02% | 26.30% | APGDEE 3.88 AQVENL VTANAT EPQK                | 2,311.11 |
| ATP | 6011 | FXDYD domain containin g ion transport regulator 6 gi 7577507 0,gi 777357 53,gi 91206 665                                                                                                                                           | 10,447.10 | 99.80%  | 2 | 2 | 2 | 0.02% | 26.30% | APGDEE 4.53 AQVENL VTANAT EPQKAE N            | 2,625.23 |
| ATP | 6011 | Synaptoja nin 2 binding protein gi 7435405 4,gi 783694 20                                                                                                                                                                           | 15,792.00 | 99.80%  | 2 | 4 | 7 | 0.08% | 19.30% | LQEGDK 5.41 ILSVNGQ DLK                       | 1,756.94 |

|     |      |                                        |                                                |            |         |    |    |    |       |        |                                                  |      |          |
|-----|------|----------------------------------------|------------------------------------------------|------------|---------|----|----|----|-------|--------|--------------------------------------------------|------|----------|
| ATP | 6011 | Synaptojanin 2 binding protein         | gi 74354054,gi 78369420                        | 15,792.00  | 99.80%  | 2  | 4  | 7  | 0.08% | 19.30% | NLLHQD<br>AVDLFR                                 | 3.81 | 1,440.76 |
| ATP | 6011 | integrin alpha-V subunit               | gi 11596385,gi 124056464                       | 116,117.20 | 100.00% | 13 | 18 | 33 | 0.36% | 19.70% | DYAKDD<br>PLEFK                                  | 3.09 | 1,340.64 |
| ATP | 6011 | integrin alpha-V subunit               | gi 11596385,gi 124056464                       | 116,117.20 | 100.00% | 13 | 18 | 33 | 0.36% | 19.70% | FDLQIQS<br>SNLFDK                                | 3.93 | 1,554.78 |
| ATP | 6011 | integrin alpha-V subunit               | gi 11596385,gi 124056464                       | 116,117.20 | 100.00% | 13 | 18 | 33 | 0.36% | 19.70% | FDLQIQS<br>SNLFDK<br>VSPVVS<br>YK                | 3.81 | 2,414.26 |
| ATP | 6011 | integrin alpha-V subunit               | gi 11596385,gi 124056464                       | 116,117.20 | 100.00% | 13 | 18 | 33 | 0.36% | 19.70% | FGSAIAP<br>LGDLDDQ<br>DGFNDI<br>AIAAPY<br>GGEDKK | 3.88 | 3,165.54 |
| ATP | 6011 | integrin alpha-V subunit               | gi 11596385,gi 124056464                       | 116,117.20 | 100.00% | 13 | 18 | 33 | 0.36% | 19.70% | FVSHQQ<br>SEMDTS<br>VK                           | 4.09 | 1,638.74 |
| ATP | 6011 | integrin alpha-V subunit               | gi 11596385,gi 124056464                       | 116,117.20 | 100.00% | 13 | 18 | 33 | 0.36% | 19.70% | GATDID<br>KNGYPD<br>LIVGAFG<br>VDR               | 4.02 | 2,293.15 |
| ATP | 6011 | integrin alpha-V subunit               | gi 11596385,gi 124056464                       | 116,117.20 | 100.00% | 13 | 18 | 33 | 0.36% | 19.70% | GIVYIFN<br>GRPTGL<br>NAVPSQI<br>LEGK             | 4.29 | 2,543.40 |
| ATP | 6011 | integrin alpha-V subunit               | gi 11596385,gi 124056464                       | 116,117.20 | 100.00% | 13 | 18 | 33 | 0.36% | 19.70% | IYIGDDN<br>PLTLIVK                               | 4.06 | 1,573.88 |
| ATP | 6011 | integrin alpha-V subunit               | gi 11596385,gi 124056464                       | 116,117.20 | 100.00% | 13 | 18 | 33 | 0.36% | 19.70% | MFLLVG<br>APK                                    | 3.42 | 991.5647 |
| ATP | 6011 | integrin alpha-V subunit               | gi 11596385,gi 124056464                       | 116,117.20 | 100.00% | 13 | 18 | 33 | 0.36% | 19.70% | PTGLNA<br>VPSQILE<br>GK                          | 3.85 | 1,523.84 |
| ATP | 6011 | integrin alpha-V subunit               | gi 11596385,gi 124056464                       | 116,117.20 | 100.00% | 13 | 18 | 33 | 0.36% | 19.70% | SSASFNV<br>IEFPYK                                | 3.95 | 1,488.74 |
| ATP | 6011 | integrin alpha-V subunit               | gi 11596385,gi 124056464                       | 116,117.20 | 100.00% | 13 | 18 | 33 | 0.36% | 19.70% | VRPPQE<br>EQEREQ<br>LQPHE<br>GEGNSE<br>T         | 2.14 | 2,917.33 |
| ATP | 6011 | integrin alpha-V subunit               | gi 11596385,gi 124056464                       | 116,117.20 | 100.00% | 13 | 18 | 33 | 0.36% | 19.70% | YKENPE<br>TEEDVG<br>PVVQHI<br>YELR               | 6.24 | 2,644.29 |
| ATP | 6011 | poly(A) binding protein, cytoplasmic 1 | gi 41386798,gi 47117093,gi 74268035,gi 8979741 | 70,653.30  | 100.00% | 3  | 3  | 3  | 0.03% | 6.60%  | ALDTMN<br>FDVIK                                  | 2.65 | 1,282.64 |
| ATP | 6011 | poly(A) binding protein, cytoplasmic 1 | gi 41386798,gi 47117093,gi 74268035,gi 8979741 | 70,653.30  | 100.00% | 3  | 3  | 3  | 0.03% | 6.60%  | IVATKPL<br>YVALAQ<br>R                           | 3.61 | 1,542.94 |
| ATP | 6011 | poly(A) binding protein, cytoplasmic 1 | gi 41386798,gi 47117093,gi 74268035,gi 8979741 | 70,653.30  | 100.00% | 3  | 3  | 3  | 0.03% | 6.60%  | SLGYAY<br>VNFQQP<br>ADAER                        | 3.68 | 1,928.91 |

|     |      |                                                                                                                                                           |                                                  |           |         |   |   |   |       |       |                                      |          |
|-----|------|-----------------------------------------------------------------------------------------------------------------------------------------------------------|--------------------------------------------------|-----------|---------|---|---|---|-------|-------|--------------------------------------|----------|
| ATP | 6011 | RecName<br>:<br>Full=Mo<br>nocarbox<br>ylate<br>transport<br>er 1;<br>Short=M<br>CT 1;<br>AltName:<br>Full=Solu<br>te carrier<br>family 16<br>member<br>1 | gi 1221399<br>73,gi 77567<br>740,gi 8261<br>7542 | 54,281.70 | 100.00% | 4 | 4 | 5 | 0.05% | 6.99% | ESKDEE 2.38<br>TNVDVA<br>EKPK        | 1,817.88 |
| ATP | 6011 | RecName<br>:<br>Full=Mo<br>nocarbox<br>ylate<br>transport<br>er 1;<br>Short=M<br>CT 1;<br>AltName:<br>Full=Solu<br>te carrier<br>family 16<br>member<br>1 | gi 1221399<br>73,gi 77567<br>740,gi 8261<br>7542 | 54,281.70 | 100.00% | 4 | 4 | 5 | 0.05% | 6.99% | GASDAN 3.54<br>TDLIGG<br>NPK         | 1,429.69 |
| ATP | 6011 | RecName<br>:<br>Full=Mo<br>nocarbox<br>ylate<br>transport<br>er 1;<br>Short=M<br>CT 1;<br>AltName:<br>Full=Solu<br>te carrier<br>family 16<br>member<br>1 | gi 1221399<br>73,gi 77567<br>740,gi 8261<br>7542 | 54,281.70 | 100.00% | 4 | 4 | 5 | 0.05% | 6.99% | GASDAN 3.14<br>TDLIGG<br>NPKEEK      | 1,815.87 |
| ATP | 6011 | RecName<br>:<br>Full=Mo<br>nocarbox<br>ylate<br>transport<br>er 1;<br>Short=M<br>CT 1;<br>AltName:<br>Full=Solu<br>te carrier<br>family 16<br>member<br>1 | gi 1221399<br>73,gi 77567<br>740,gi 8261<br>7542 | 54,281.70 | 100.00% | 4 | 4 | 5 | 0.05% | 6.99% | GASDAN 2.74<br>TDLIGG<br>NPKEEK<br>K | 1,943.97 |

|     |      |                                                                                                    |                                                                                                                                                  |           |         |    |    |    |       |        |                                               |      |          |
|-----|------|----------------------------------------------------------------------------------------------------|--------------------------------------------------------------------------------------------------------------------------------------------------|-----------|---------|----|----|----|-------|--------|-----------------------------------------------|------|----------|
| ATP | 6011 | PREDICTED:<br>similar to<br>program<br>med cell<br>death 6<br>interactin<br>g protein<br>isoform 1 | gi 119914274                                                                                                                                     | 96,862.00 | 99.80%  | 2  | 2  | 2  | 0.02% | 4.69%  | EPSAPSI<br>PTPTYQS<br>SPAGGH<br>APTPTP<br>APR | 2.17 | 2,966.46 |
| ATP | 6011 | PREDICTED:<br>similar to<br>program<br>med cell<br>death 6<br>interactin<br>g protein<br>isoform 1 | gi 119914274                                                                                                                                     | 96,862.00 | 99.80%  | 2  | 2  | 2  | 0.02% | 4.69%  | NIQVSH<br>QEFSK                               | 3.53 | 1,316.66 |
| ATP | 6011 | Actin<br>related<br>protein<br>2/3<br>complex,<br>subunit 4,<br>20kDa                              | gi 109939945,gi 115495705,gi 1192/3361249,gi 149243014,gi 149243029,gi 149243036,gi 149243043,gi 149243050,gi 149243057,gi 149243064,gi 56966197 | 19,649.40 | 99.80%  | 2  | 2  | 2  | 0.02% | 11.30% | AENFFIL<br>R                                  | 2.25 | 1,009.55 |
| ATP | 6011 | Actin<br>related<br>protein<br>2/3<br>complex,<br>subunit 4,<br>20kDa                              | gi 109939945,gi 115495705,gi 1192/3361249,gi 149243014,gi 149243029,gi 149243036,gi 149243043,gi 149243050,gi 149243057,gi 149243064,gi 56966197 | 19,649.40 | 99.80%  | 2  | 2  | 2  | 0.02% | 11.30% | ELLQNP<br>VTISR                               | 3.37 | 1,268.76 |
| ATP | 6011 | H(+)-<br>transporting<br>ATP<br>synthase                                                           | gi 102,gi 114402,gi 158429020,gi 158429022,gi 158431066,gi 158431067,gi 158431068,gi 27807237                                                    | 55,248.00 | 100.00% | 19 | 24 | 43 | 0.47% | 46.70% | AVDSL<br>PIGR                                 | 3.56 | 1,026.59 |
| ATP | 6011 | H(+)-<br>transporting<br>ATP<br>synthase                                                           | gi 102,gi 114402,gi 158429020,gi 158429022,gi 158431066,gi 158431067,gi 158431068,gi 27807237                                                    | 55,248.00 | 100.00% | 19 | 24 | 43 | 0.47% | 46.70% | EAYPGD<br>VFYLHS<br>R                         | 2.82 | 1,553.74 |

|     |      |                                           |                                                                                                                                                |           |         |    |    |    |       |        |                                         |          |
|-----|------|-------------------------------------------|------------------------------------------------------------------------------------------------------------------------------------------------|-----------|---------|----|----|----|-------|--------|-----------------------------------------|----------|
| ATP | 6011 | H(+)-<br>transporti<br>ng ATP<br>synthase | gi 102,gi 11<br>4402,gi 158<br>429020,gi 1<br>58429021,g<br>i 15842902<br>2,gi 158431<br>066,gi 1584<br>31067,gi 15<br>8431068,gi <br>27807237 | 55,248.00 | 100.00% | 19 | 24 | 43 | 0.47% | 46.70% | EVAafa 4.72<br>QFGSDL<br>DAATQQ<br>LLSR | 2,338.17 |
| ATP | 6011 | H(+)-<br>transporti<br>ng ATP<br>synthase | gi 102,gi 11<br>4402,gi 158<br>429020,gi 1<br>58429021,g<br>i 15842902<br>2,gi 158431<br>066,gi 1584<br>31067,gi 15<br>8431068,gi <br>27807237 | 55,248.00 | 100.00% | 19 | 24 | 43 | 0.47% | 46.70% | FENaFLS 3.17<br>HVISQH<br>QALLSK        | 2,169.15 |
| ATP | 6011 | H(+)-<br>transporti<br>ng ATP<br>synthase | gi 102,gi 11<br>4402,gi 158<br>429020,gi 1<br>58429021,g<br>i 15842902<br>2,gi 158431<br>066,gi 1584<br>31067,gi 15<br>8431068,gi <br>27807237 | 55,248.00 | 100.00% | 19 | 24 | 43 | 0.47% | 46.70% | GIRPAIN 3.62<br>VGLSVS<br>R             | 1,438.85 |
| ATP | 6011 | H(+)-<br>transporti<br>ng ATP<br>synthase | gi 102,gi 11<br>4402,gi 158<br>429020,gi 1<br>58429021,g<br>i 15842902<br>2,gi 158431<br>066,gi 1584<br>31067,gi 15<br>8431068,gi <br>27807237 | 55,248.00 | 100.00% | 19 | 24 | 43 | 0.47% | 46.70% | GMSLNL 4.07<br>EPDNVG<br>VVVFGN<br>DK   | 2,120.03 |
| ATP | 6011 | H(+)-<br>transporti<br>ng ATP<br>synthase | gi 102,gi 11<br>4402,gi 158<br>429020,gi 1<br>58429021,g<br>i 15842902<br>2,gi 158431<br>066,gi 1584<br>31067,gi 15<br>8431068,gi <br>27807237 | 55,248.00 | 100.00% | 19 | 24 | 43 | 0.47% | 46.70% | GYLDKL 1.89<br>EPSK                     | 1,149.62 |
| ATP | 6011 | H(+)-<br>transporti<br>ng ATP<br>synthase | gi 102,gi 11<br>4402,gi 158<br>429020,gi 1<br>58429021,g<br>i 15842902<br>2,gi 158431<br>066,gi 1584<br>31067,gi 15<br>8431068,gi <br>27807237 | 55,248.00 | 100.00% | 19 | 24 | 43 | 0.47% | 46.70% | HALIIYD 3.71<br>DLSK                    | 1,287.69 |

|     |      |                                           |                                                                                                                                                |           |         |    |    |    |       |        |                                         |          |
|-----|------|-------------------------------------------|------------------------------------------------------------------------------------------------------------------------------------------------|-----------|---------|----|----|----|-------|--------|-----------------------------------------|----------|
| ATP | 6011 | H(+)-<br>transporti<br>ng ATP<br>synthase | gi 102,gi 11<br>4402,gi 158<br>429020,gi 1<br>58429021,g<br>i 15842902<br>2,gi 158431<br>066,gi 1584<br>31067,gi 15<br>8431068,gi <br>27807237 | 55,248.00 | 100.00% | 19 | 24 | 43 | 0.47% | 46.70% | ILGADTS 4.26<br>VDLEET<br>GR            | 1,575.79 |
| ATP | 6011 | H(+)-<br>transporti<br>ng ATP<br>synthase | gi 102,gi 11<br>4402,gi 158<br>429020,gi 1<br>58429021,g<br>i 15842902<br>2,gi 158431<br>066,gi 1584<br>31067,gi 15<br>8431068,gi <br>27807237 | 55,248.00 | 100.00% | 19 | 24 | 43 | 0.47% | 46.70% | ITKFENA 3.32<br>FLSHVIS<br>QHQALL<br>SK | 2,511.37 |
| ATP | 6011 | H(+)-<br>transporti<br>ng ATP<br>synthase | gi 102,gi 11<br>4402,gi 158<br>429020,gi 1<br>58429021,g<br>i 15842902<br>2,gi 158431<br>066,gi 1584<br>31067,gi 15<br>8431068,gi <br>27807237 | 55,248.00 | 100.00% | 19 | 24 | 43 | 0.47% | 46.70% | LELAQY 2.6<br>R                         | 892.4887 |
| ATP | 6011 | H(+)-<br>transporti<br>ng ATP<br>synthase | gi 102,gi 11<br>4402,gi 158<br>429020,gi 1<br>58429021,g<br>i 15842902<br>2,gi 158431<br>066,gi 1584<br>31067,gi 15<br>8431068,gi <br>27807237 | 55,248.00 | 100.00% | 19 | 24 | 43 | 0.47% | 46.70% | LKEIVTN 3.52<br>FLAGFE<br>A             | 1,551.84 |
| ATP | 6011 | H(+)-<br>transporti<br>ng ATP<br>synthase | gi 102,gi 11<br>4402,gi 158<br>429020,gi 1<br>58429021,g<br>i 15842902<br>2,gi 158431<br>066,gi 1584<br>31067,gi 15<br>8431068,gi <br>27807237 | 55,248.00 | 100.00% | 19 | 24 | 43 | 0.47% | 46.70% | TGAIVD 4.28<br>VPVGEE<br>LLGR           | 1,624.89 |
| ATP | 6011 | H(+)-<br>transporti<br>ng ATP<br>synthase | gi 102,gi 11<br>4402,gi 158<br>429020,gi 1<br>58429021,g<br>i 15842902<br>2,gi 158431<br>066,gi 1584<br>31067,gi 15<br>8431068,gi <br>27807237 | 55,248.00 | 100.00% | 19 | 24 | 43 | 0.47% | 46.70% | TGTAEV 4.35<br>SSILEER                  | 1,391.70 |

|     |      |                                                                   |                                                                                                                                                |           |         |    |    |    |       |        |                                  |          |
|-----|------|-------------------------------------------------------------------|------------------------------------------------------------------------------------------------------------------------------------------------|-----------|---------|----|----|----|-------|--------|----------------------------------|----------|
| ATP | 6011 | H(+)-<br>transporti<br>ng ATP<br>synthase                         | gi 102,gi 11<br>4402,gi 158<br>429020,gi 1<br>58429021,g<br>i 15842902<br>2,gi 158431<br>066,gi 1584<br>31067,gi 15<br>8431068,gi <br>27807237 | 55,248.00 | 100.00% | 19 | 24 | 43 | 0.47% | 46.70% | TSIAIDTI 3.11<br>INQK            | 1,316.74 |
| ATP | 6011 | H(+)-<br>transporti<br>ng ATP<br>synthase                         | gi 102,gi 11<br>4402,gi 158<br>429020,gi 1<br>58429021,g<br>i 15842902<br>2,gi 158431<br>066,gi 1584<br>31067,gi 15<br>8431068,gi <br>27807237 | 55,248.00 | 100.00% | 19 | 24 | 43 | 0.47% | 46.70% | VGLKAP 3.02<br>GIIPR             | 1,120.72 |
| ATP | 6011 | H(+)-<br>transporti<br>ng ATP<br>synthase                         | gi 102,gi 11<br>4402,gi 158<br>429020,gi 1<br>58429021,g<br>i 15842902<br>2,gi 158431<br>066,gi 1584<br>31067,gi 15<br>8431068,gi <br>27807237 | 55,248.00 | 100.00% | 19 | 24 | 43 | 0.47% | 46.70% | VLSIGDG 2.42<br>IAR              | 1,000.58 |
| ATP | 6011 | H(+)-<br>transporti<br>ng ATP<br>synthase                         | gi 102,gi 11<br>4402,gi 158<br>429020,gi 1<br>58429021,g<br>i 15842902<br>2,gi 158431<br>066,gi 1584<br>31067,gi 15<br>8431068,gi <br>27807237 | 55,248.00 | 100.00% | 19 | 24 | 43 | 0.47% | 46.70% | VVDALG 3.49<br>NAIDGK            | 1,171.63 |
| ATP | 6011 | H(+)-<br>transporti<br>ng ATP<br>synthase                         | gi 102,gi 11<br>4402,gi 158<br>429020,gi 1<br>58429021,g<br>i 15842902<br>2,gi 158431<br>066,gi 1584<br>31067,gi 15<br>8431068,gi <br>27807237 | 55,248.00 | 100.00% | 19 | 24 | 43 | 0.47% | 46.70% | VVDALG 5.37<br>NAIDGK<br>GPIGSK  | 1,710.94 |
| ATP | 6011 | PREDIC<br>TED:<br>similar to<br>60S<br>ribosomal<br>protein<br>L9 | gi 1199043<br>84,gi 11990<br>5715,gi 164<br>420694,gi 7<br>6607197,gi <br>91207745                                                             | 21,858.70 | 99.80%  | 2  | 3  | 3  | 0.03% | 15.10% | FLDGIYV 3.06<br>SEK              | 1,170.60 |
| ATP | 6011 | PREDIC<br>TED:<br>similar to<br>60S<br>ribosomal<br>protein<br>L9 | gi 1199043<br>84,gi 11990<br>5715,gi 164<br>420694,gi 7<br>6607197,gi <br>91207745                                                             | 21,858.70 | 99.80%  | 2  | 3  | 3  | 0.03% | 15.10% | TILSNQT 4.35<br>VDIPENV<br>DINLK | 2,126.13 |



|     |      |                                              |                                                   |           |         |   |    |    |       |        |                                                    |          |
|-----|------|----------------------------------------------|---------------------------------------------------|-----------|---------|---|----|----|-------|--------|----------------------------------------------------|----------|
| ATP | 6011 | SEC22 vesicle traffickin g protein homolog B | gi 115496488,gi 74354583                          | 28,710.00 | 100.00% | 7 | 10 | 13 | 0.14% | 38.20% | IMVANIE 4.44<br>EVLQR                              | 1,430.77 |
| ATP | 6011 | SEC22 vesicle traffickin g protein homolog B | gi 115496488,gi 74354583                          | 28,710.00 | 100.00% | 7 | 10 | 13 | 0.14% | 38.20% | KLAFAY 5.11<br>LEDLHS<br>EFDEQH<br>GK              | 2,377.15 |
| ATP | 6011 | SEC22 vesicle traffickin g protein homolog B | gi 115496488,gi 74354583                          | 28,710.00 | 100.00% | 7 | 10 | 13 | 0.14% | 38.20% | KVPTVS 2.98<br>RPYSFIE<br>FDTYIQK                  | 2,418.27 |
| ATP | 6011 | SEC22 vesicle traffickin g protein homolog B | gi 115496488,gi 74354583                          | 28,710.00 | 100.00% | 7 | 10 | 13 | 0.14% | 38.20% | NLGSINT 5<br>ELQDVQ<br>R                           | 1,586.81 |
| ATP | 6011 | SEC22 vesicle traffickin g protein homolog B | gi 115496488,gi 74354583                          | 28,710.00 | 100.00% | 7 | 10 | 13 | 0.14% | 38.20% | RNLGSIN 3.4<br>TELQDV<br>QR                        | 1,742.91 |
| ATP | 6011 | SEC22 vesicle traffickin g protein homolog B | gi 115496488,gi 74354583                          | 28,710.00 | 100.00% | 7 | 10 | 13 | 0.14% | 38.20% | VADGLP 4.21<br>LAASMQ<br>EDEQSG<br>R               | 1,989.92 |
| ATP | 6011 | SEC22 vesicle traffickin g protein homolog B | gi 115496488,gi 74354583                          | 28,710.00 | 100.00% | 7 | 10 | 13 | 0.14% | 38.20% | VADGLP 4.51<br>LAASMQ<br>EDEQSG<br>RDLQQY<br>QSQAK | 3,179.49 |
| ATP | 6011 | GTP-binding protein (smg p21B)               | gi 163722,gi 28461271,gi 4711772,gi 2,gi 74354581 | 20,806.90 | 100.00% | 3 | 3  | 5  | 0.05% | 13.60% | INVNEIF 4.77<br>YDLVR                              | 1,494.80 |
| ATP | 6011 | GTP-binding protein (smg p21B)               | gi 163722,gi 28461271,gi 4711772,gi 2,gi 74354581 | 20,806.90 | 100.00% | 3 | 3  | 5  | 0.05% | 13.60% | LVVLGS 2.85<br>GGVGK                               | 985.6042 |
| ATP | 6011 | GTP-binding protein (smg p21B)               | gi 163722,gi 28461271,gi 4711772,gi 2,gi 74354581 | 20,806.90 | 100.00% | 3 | 3  | 5  | 0.05% | 13.60% | SKINVNE 4.02<br>IFYDLVR                            | 1,709.92 |
| ATP | 6011 | metadherin                                   | gi 114051299,gi 89994114                          | 64,037.90 | 100.00% | 3 | 4  | 4  | 0.04% | 7.89%  | KREEAA 3.26<br>AAAPAP<br>AADDQG<br>VLK             | 2,079.08 |
| ATP | 6011 | metadherin                                   | gi 114051299,gi 89994114                          | 64,037.90 | 100.00% | 3 | 4  | 4  | 0.04% | 7.89%  | TELGLD 3.18<br>LGLPEK                              | 1,284.70 |
| ATP | 6011 | metadherin                                   | gi 114051299,gi 89994114                          | 64,037.90 | 100.00% | 3 | 4  | 4  | 0.04% | 7.89%  | TISTSDP 2.98<br>ADALIK                             | 1,331.71 |

|     |      |                                                                              |                                               |           |         |   |   |    |       |        |                                      |      |          |
|-----|------|------------------------------------------------------------------------------|-----------------------------------------------|-----------|---------|---|---|----|-------|--------|--------------------------------------|------|----------|
| ATP | 6011 | Reticulocalbin 2, EF-hand calcium binding domain                             | gi 111304972,gi 115497628                     | 36,892.40 | 100.00% | 3 | 3 | 3  | 0.03% | 17.70% | ADYDRE<br>ALLGGQ<br>EEVDEY<br>VK     | 4.21 | 2,299.07 |
| ATP | 6011 | Reticulocalbin 2, EF-hand calcium binding domain                             | gi 111304972,gi 115497628                     | 36,892.40 | 100.00% | 3 | 3 | 3  | 0.03% | 17.70% | KLSEEEI<br>LENQDL<br>FLTSEAT<br>DYGR | 2.68 | 2,800.35 |
| ATP | 6011 | Reticulocalbin 2, EF-hand calcium binding domain                             | gi 111304972,gi 115497628                     | 36,892.40 | 100.00% | 3 | 3 | 3  | 0.03% | 17.70% | QLHDEY<br>FYHDEL                     | 3.05 | 1,608.70 |
| ATP | 6011 | RecName : Full=ATP synthase subunit g, mitochondrial; Short=ATPase subunit g | gi 2493093,gi 74354012,gi 7579922,gi 94400870 | 11,604.00 | 100.00% | 3 | 5 | 10 | 0.11% | 37.50% | APALVN<br>AAVTYS<br>KPR              | 3.69 | 1,557.87 |
| ATP | 6011 | RecName : Full=ATP synthase subunit g, mitochondrial; Short=ATPase subunit g | gi 2493093,gi 74354012,gi 7579922,gi 94400870 | 11,604.00 | 100.00% | 3 | 5 | 10 | 0.11% | 37.50% | NLAEKA<br>PALVNA<br>AVTYSK<br>PR     | 4.31 | 2,113.18 |
| ATP | 6011 | RecName : Full=ATP synthase subunit g, mitochondrial; Short=ATPase subunit g | gi 2493093,gi 74354012,gi 7579922,gi 94400870 | 11,604.00 | 100.00% | 3 | 5 | 10 | 0.11% | 37.50% | VELVPP<br>TPAEIPT<br>AIQSLK          | 3    | 2,003.14 |
| ATP | 6011 | guanine nucleotide binding protein (G protein), q polypeptide                | gi 158508558                                  | 42,125.60 | 100.00% | 3 | 3 | 3  | 0.03% | 16.20% | DTILQLN<br>LK                        | 2.6  | 1,057.63 |
| ATP | 6011 | guanine nucleotide binding protein (G protein), q polypeptide                | gi 158508558                                  | 42,125.60 | 100.00% | 3 | 3 | 3  | 0.03% | 16.20% | VADPAY<br>LPTQQD<br>VLR              | 3.61 | 1,685.89 |

|     |      |                                                                                                                                 |            |           |         |   |   |   |       |        |                                   |      |          |
|-----|------|---------------------------------------------------------------------------------------------------------------------------------|------------|-----------|---------|---|---|---|-------|--------|-----------------------------------|------|----------|
| ATP | 6011 | guanine nucleotide binding protein (G protein), q polypeptide                                                                   | gi 1585085 | 42,125.60 | 100.00% | 3 | 3 | 3 | 0.03% | 16.20% | VRVPTT<br>GIIEYPF<br>DLQSVIF<br>R | 5.7  | 2,450.34 |
| ATP | 6011 | guanine nucleotide binding protein (G protein), q polypeptide                                                                   | gi 1585085 | 42,125.60 | 100.00% | 3 | 3 | 3 | 0.03% | 16.20% | VSAFEN<br>PYVDAI<br>K             | 3.69 | 1,452.74 |
| ATP | 6011 | PREDICTED: similar to CDW92 antigen isoform 1                                                                                   | gi 1199009 | 72,875.80 | 99.90%  | 2 | 2 | 2 | 0.02% | 3.66%  | LPVPAS<br>APIFFH<br>R             | 3.46 | 1,548.87 |
| ATP | 6011 | PREDICTED: similar to CDW92 antigen isoform 1                                                                                   | gi 1199009 | 72,875.80 | 99.90%  | 2 | 2 | 2 | 0.02% | 3.66%  | VLMEFV<br>ENSR                    | 2.69 | 1,239.60 |
| ATP | 6011 | RecName: Full=Eukaryotic initiation factor 4A-I; Short=eIF4A-I; Short=eIF4A-I; AltName: Full=ATP-dependent RNA helicase eIF4A-1 | gi 1098924 | 46,137.30 | 100.00% | 4 | 4 | 4 | 0.04% | 14.00% | GFKDQI<br>YDIFQK                  | 3.93 | 1,501.77 |
| ATP | 6011 | RecName: Full=Eukaryotic initiation factor 4A-I; Short=eIF4A-I; Short=eIF4A-I; AltName: Full=ATP-dependent RNA helicase eIF4A-1 | gi 1098924 | 46,137.30 | 100.00% | 4 | 4 | 4 | 0.04% | 14.00% | GIYAYG<br>FEKPSAI<br>QQR          | 2.74 | 1,827.94 |

|     |      |                                                                                                                                                                                             |                                                   |           |         |   |   |   |       |        |                                  |      |          |
|-----|------|---------------------------------------------------------------------------------------------------------------------------------------------------------------------------------------------|---------------------------------------------------|-----------|---------|---|---|---|-------|--------|----------------------------------|------|----------|
| ATP | 6011 | RecName<br>:<br>Full=Euk<br>aryotic<br>initiation<br>factor 4A-<br>I;<br>Short=eI<br>F-4A-I;<br>Short=eI<br>F4A-I;<br>AltName:<br>Full=AT<br>P-<br>dependen<br>t RNA<br>helicase<br>eIF4A-1 | gi 1098924<br>71.gi 74268<br>155.gi 7773<br>5407  | 46,137.30 | 100.00% | 4 | 4 | 4 | 0.04% | 14.00% | GYDVIA<br>QAQSGT<br>GK           | 3.41 | 1,394.69 |
| ATP | 6011 | RecName<br>:<br>Full=Euk<br>aryotic<br>initiation<br>factor 4A-<br>I;<br>Short=eI<br>F-4A-I;<br>Short=eI<br>F4A-I;<br>AltName:<br>Full=AT<br>P-<br>dependen<br>t RNA<br>helicase<br>eIF4A-1 | gi 1098924<br>71.gi 74268<br>155.gi 7773<br>5407  | 46,137.30 | 100.00% | 4 | 4 | 4 | 0.04% | 14.00% | LQMEAP<br>HIIVGTP<br>GR          | 3.26 | 1,634.87 |
| ATP | 6011 | RecName<br>:<br>Full=Mit<br>ochondri<br>al Rho<br>GTPase<br>I;<br>Short=MI<br>RO-1;<br>AltName:<br>Full=Ras<br>homolog<br>gene<br>family<br>member<br>T1                                    | gi 1088607<br>95.gi 11405<br>1724.gi 886<br>82961 | 72,061.70 | 100.00% | 2 | 3 | 3 | 0.03% | 4.91%  | ISDQDN<br>DGTLND<br>AELNFF<br>QR | 3.97 | 2,312.04 |

|     |      |                                                                                                                         |                                       |           |         |    |    |    |       |        |                                                 |          |
|-----|------|-------------------------------------------------------------------------------------------------------------------------|---------------------------------------|-----------|---------|----|----|----|-------|--------|-------------------------------------------------|----------|
| ATP | 6011 | RecName :<br>Full=Mitochondrial<br>al Rho GTPase 1;<br>Short=MIRO-1;<br>AltName: Full=Ras homolog gene family member T1 | gi 108860795.gi 114051724.gi 88682961 | 72,061.70 | 100.00% | 2  | 3  | 3  | 0.03% | 4.91%  | NISELFY 2.69<br>YAQK                            | 1,375.69 |
| ATP | 6011 | TMPO protein                                                                                                            | gi 146186841.gi 147902328             | 42,927.20 | 100.00% | 8  | 11 | 15 | 0.16% | 27.00% | GAAGRP 2.15<br>LELSDFR                          | 1,388.73 |
| ATP | 6011 | TMPO protein                                                                                                            | gi 146186841.gi 147902328             | 42,927.20 | 100.00% | 8  | 11 | 15 | 0.16% | 27.00% | GPPDFSS 4.62<br>DEEREP<br>TPVLGS<br>GAAVAG<br>R | 2,598.24 |
| ATP | 6011 | TMPO protein                                                                                                            | gi 146186841.gi 147902328             | 42,927.20 | 100.00% | 8  | 11 | 15 | 0.16% | 27.00% | HAAPILP 3.17<br>ITEFSDIP<br>R                   | 1,776.96 |
| ATP | 6011 | TMPO protein                                                                                                            | gi 146186841.gi 147902328             | 42,927.20 | 100.00% | 8  | 11 | 15 | 0.16% | 27.00% | LKSELV 5.41<br>ANNVTL<br>PAGEQR                 | 1,939.06 |
| ATP | 6011 | TMPO protein                                                                                                            | gi 146186841.gi 147902328             | 42,927.20 | 100.00% | 8  | 11 | 15 | 0.16% | 27.00% | LKSELV 3.71<br>ANNVTL<br>PAGEQR<br>K            | 2,067.16 |
| ATP | 6011 | TMPO protein                                                                                                            | gi 146186841.gi 147902328             | 42,927.20 | 100.00% | 8  | 11 | 15 | 0.16% | 27.00% | SELVAN 4.3<br>NVTLPA<br>GEQR                    | 1,697.88 |
| ATP | 6011 | TMPO protein                                                                                                            | gi 146186841.gi 147902328             | 42,927.20 | 100.00% | 8  | 11 | 15 | 0.16% | 27.00% | SSTPLPT 2.99<br>ISSSVEN<br>TR                   | 1,675.85 |
| ATP | 6011 | TMPO protein                                                                                                            | gi 146186841.gi 147902328             | 42,927.20 | 100.00% | 8  | 11 | 15 | 0.16% | 27.00% | YGVNPG 3.1<br>PIVGTR                            | 1,330.71 |
| ATP | 6011 | SLC25A12 protein                                                                                                        | gi 151556133.gi 155372111             | 74,513.90 | 100.00% | 10 | 10 | 10 | 0.11% | 19.70% | FGLYLP 2.67<br>K                                | 837.487  |
| ATP | 6011 | SLC25A12 protein                                                                                                        | gi 151556133.gi 155372111             | 74,513.90 | 100.00% | 10 | 10 | 10 | 0.11% | 19.70% | FKPPSVA 3.44<br>VVQPK                           | 1,296.77 |
| ATP | 6011 | SLC25A12 protein                                                                                                        | gi 151556133.gi 155372111             | 74,513.90 | 100.00% | 10 | 10 | 10 | 0.11% | 19.70% | FTLGSV 3.98<br>AGAVGA<br>TAVYPID<br>LVK         | 2,149.19 |
| ATP | 6011 | SLC25A12 protein                                                                                                        | gi 151556133.gi 155372111             | 74,513.90 | 100.00% | 10 | 10 | 10 | 0.11% | 19.70% | GLIPQLI 2.35<br>GVAPEK                          | 1,334.80 |
| ATP | 6011 | SLC25A12 protein                                                                                                        | gi 151556133.gi 155372111             | 74,513.90 | 100.00% | 10 | 10 | 10 | 0.11% | 19.70% | HLNYTE 4.98<br>FTQFLQE<br>LQLEHA<br>R           | 2,517.25 |
| ATP | 6011 | SLC25A12 protein                                                                                                        | gi 151556133.gi 155372111             | 74,513.90 | 100.00% | 10 | 10 | 10 | 0.11% | 19.70% | IAPLAEG 3.77<br>ALPYNL<br>AELQR                 | 1,939.06 |
| ATP | 6011 | SLC25A12 protein                                                                                                        | gi 151556133.gi 155372111             | 74,513.90 | 100.00% | 10 | 10 | 10 | 0.11% | 19.70% | LATATF 3.28<br>AGIENK                           | 1,235.66 |

|     |      |                                                  |                                                             |            |         |    |    |    |       |        |                             |      |          |
|-----|------|--------------------------------------------------|-------------------------------------------------------------|------------|---------|----|----|----|-------|--------|-----------------------------|------|----------|
| ATP | 6011 | SLC25A12 protein                                 | gi 151556133,gi 155372111                                   | 74,513.90  | 100.00% | 10 | 10 | 10 | 0.11% | 19.70% | LTLDADIE R                  | 2.17 | 930.5256 |
| ATP | 6011 | SLC25A12 protein                                 | gi 151556133,gi 155372111                                   | 74,513.90  | 100.00% | 10 | 10 | 10 | 0.11% | 19.70% | LTVNDF VR                   | 2.32 | 963.5258 |
| ATP | 6011 | SLC25A12 protein                                 | gi 151556133,gi 155372111                                   | 74,513.90  | 100.00% | 10 | 10 | 10 | 0.11% | 19.70% | YLGLYN K                    | 4.07 | 1,494.72 |
| ATP | 6011 | RecName : Full=Cytochrome b5                     | gi 117806,gi 1372997,gi 15783077,gi 278066,gi 79160196      | 15,311.60  | 100.00% | 3  | 3  | 3  | 0.03% | 34.30% | EQAGGD ATENFE DVGHST DAR    | 2.79 | 2,205.93 |
| ATP | 6011 | RecName : Full=Cytochrome b5                     | gi 117806,gi 1372997,gi 15783077,gi 278066,gi 79160196      | 15,311.60  | 100.00% | 3  | 3  | 3  | 0.03% | 34.30% | FLEEHPG GEEVLR              | 2.32 | 1,511.75 |
| ATP | 6011 | RecName : Full=Cytochrome b5                     | gi 117806,gi 1372997,gi 15783077,gi 278066,gi 79160196      | 15,311.60  | 100.00% | 3  | 3  | 3  | 0.03% | 34.30% | TFIIGEL HPDDR               | 3.39 | 1,412.72 |
| ATP | 6011 | ALDH3A2 protein                                  | gi 151557095,gi 156120617                                   | 54,059.30  | 99.80%  | 2  | 2  | 2  | 0.02% | 4.95%  | IAFGGE MDEATR               | 3.04 | 1,312.58 |
| ATP | 6011 | ALDH3A2 protein                                  | gi 151557095,gi 156120617                                   | 54,059.30  | 99.80%  | 2  | 2  | 2  | 0.02% | 4.95%  | NADEAI QFINER               | 3.02 | 1,419.69 |
| ATP | 6011 | IKK interactin g protein                         | gi 126010633,gi 126165284,gi 193806036                      | 39,199.60  | 100.00% | 3  | 3  | 3  | 0.03% | 13.50% | LEPLVN DLTLR                | 2.45 | 1,282.74 |
| ATP | 6011 | IKK interactin g protein                         | gi 126010633,gi 126165284,gi 193806036                      | 39,199.60  | 100.00% | 3  | 3  | 3  | 0.03% | 13.50% | METSEF QGLQSK               | 3.89 | 1,400.64 |
| ATP | 6011 | IKK interactin g protein                         | gi 126010633,gi 126165284,gi 193806036                      | 39,199.60  | 100.00% | 3  | 3  | 3  | 0.03% | 13.50% | MSGLVT DVTSLT DSVQEL ENKIEK | 3.51 | 2,652.33 |
| ATP | 6011 | defender against cell death 1                    | gi 59858361,gi 73918963,gi 74354770,gi 77736467,gi 83286811 | 12,477.50  | 99.80%  | 2  | 2  | 4  | 0.04% | 19.50% | ADFQGIS PER                 | 3    | 1,119.54 |
| ATP | 6011 | defender against cell death 1                    | gi 59858361,gi 73918963,gi 74354770,gi 77736467,gi 83286811 | 12,477.50  | 99.80%  | 2  | 2  | 4  | 0.04% | 19.50% | FLEEYLS ATPQR               | 3.28 | 1,453.73 |
| ATP | 6011 | PREDICTED: similar to optic atrophy 1 isoform 16 | gi 194663697                                                | 115,574.20 | 100.00% | 2  | 2  | 2  | 0.02% | 3.31%  | GNSSESI EAIRDYE EEFFQNS K   | 3.89 | 2,579.15 |

|     |      |                                                                     |                                               |            |         |   |   |    |       |        |                                          |          |
|-----|------|---------------------------------------------------------------------|-----------------------------------------------|------------|---------|---|---|----|-------|--------|------------------------------------------|----------|
| ATP | 6011 | PREDICTED:<br>similar to optic atrophy 1 isoform 16                 | gi 194663697                                  | 115,574.20 | 100.00% | 2 | 2 | 2  | 0.02% | 3.31%  | TSVLEMI 2.75<br>AQAR                     | 1,234.65 |
| ATP | 6011 | Prostaglandin I2 (prostacyclin) synthase 23                         | gi 112362385,gi 2493372,gi 27806107,gi 538523 | 56,613.60  | 100.00% | 5 | 8 | 10 | 0.11% | 12.60% | ELQALT 3.7<br>DAMYTN LR                  | 1,654.81 |
| ATP | 6011 | Prostaglandin I2 (prostacyclin) synthase 23                         | gi 112362385,gi 2493372,gi 27806107,gi 538523 | 56,613.60  | 100.00% | 5 | 8 | 10 | 0.11% | 12.60% | LLLFPFL 2.47<br>SPQK                     | 1,302.78 |
| ATP | 6011 | Prostaglandin I2 (prostacyclin) synthase 23                         | gi 112362385,gi 2493372,gi 27806107,gi 538523 | 56,613.60  | 100.00% | 5 | 8 | 10 | 0.11% | 12.60% | LLLFPFL 2.48<br>SPQKDP<br>EIYTDPE<br>VFK | 2,736.45 |
| ATP | 6011 | Prostaglandin I2 (prostacyclin) synthase 23                         | gi 112362385,gi 2493372,gi 27806107,gi 538523 | 56,613.60  | 100.00% | 5 | 8 | 10 | 0.11% | 12.60% | LTAAPFI 2.7<br>TR                        | 989.5779 |
| ATP | 6011 | Prostaglandin I2 (prostacyclin) synthase 23                         | gi 112362385,gi 2493372,gi 27806107,gi 538523 | 56,613.60  | 100.00% | 5 | 8 | 10 | 0.11% | 12.60% | VLDSMP 4.16<br>VLDSVL<br>SESLR           | 1,875.97 |
| ATP | 6011 | PREDICTED:<br>heterogeneous nuclear ribonucleoprotein M isoform 2   | gi 119894863                                  | 77,466.20  | 100.00% | 3 | 3 | 3  | 0.03% | 6.03%  | AFITNIPF 2.35<br>DVK                     | 1,264.69 |
| ATP | 6011 | PREDICTED:<br>heterogeneous nuclear ribonucleoprotein M isoform 2   | gi 119894863                                  | 77,466.20  | 100.00% | 3 | 3 | 3  | 0.03% | 6.03%  | GNFGGS 3.72<br>FAGSFG<br>GAGGHA<br>PGVAR | 2,034.95 |
| ATP | 6011 | PREDICTED:<br>heterogeneous nuclear ribonucleoprotein M isoform 2   | gi 119894863                                  | 77,466.20  | 100.00% | 3 | 3 | 3  | 0.03% | 6.03%  | INEILSN 2.69<br>ALK                      | 1,114.65 |
| ATP | 6011 | PREDICTED:<br>similar to signal peptidase complex subunit 2 homolog | gi 194673376                                  | 24,871.10  | 99.80%  | 2 | 2 | 3  | 0.03% | 13.30% | FFDHSG 5.07<br>TLVMDA<br>YEPEISR         | 2,230.01 |

|     |      |                                                                     |                                       |           |         |   |   |   |       |        |                                                          |          |
|-----|------|---------------------------------------------------------------------|---------------------------------------|-----------|---------|---|---|---|-------|--------|----------------------------------------------------------|----------|
| ATP | 6011 | PREDICTED:<br>similar to signal peptidase complex subunit 2 homolog | gi 194673376                          | 24,871.10 | 99.80%  | 2 | 2 | 3 | 0.03% | 13.30% | YVENFG 2.87<br>LIDGR                                     | 1,282.64 |
| ATP | 6011 | KRT6A protein                                                       | gi 133778363,gi 134085706             | 60,803.10 | 99.80%  | 2 | 2 | 3 | 0.03% | 11.60% | AQYEEIA 2.63<br>QR                                       | 1,107.54 |
| ATP | 6011 | KRT6A protein                                                       | gi 133778363,gi 134085706             | 60,803.10 | 99.80%  | 2 | 2 | 3 | 0.03% | 11.60% | NKYEDE 3.37<br>INKR                                      | 1,308.65 |
| ATP | 6011 | KRT6A protein                                                       | gi 133778363,gi 134085706             | 60,803.10 | 99.80%  | 2 | 2 | 3 | 0.03% | 11.60% | NLDLDSI 4.82<br>IAEVK                                    | 1,329.73 |
| ATP | 6011 | KRT6A protein                                                       | gi 133778363,gi 134085706             | 60,803.10 | 99.80%  | 2 | 2 | 3 | 0.03% | 11.60% | QNLEPLF 3.73<br>EQYINN<br>LR                             | 1,890.97 |
| ATP | 6011 | KRT6A protein                                                       | gi 133778363,gi 134085706             | 60,803.10 | 99.80%  | 2 | 2 | 3 | 0.03% | 11.60% | WTLLQE 3.48<br>QGTK                                      | 1,203.64 |
| ATP | 6011 | KRT6A protein                                                       | gi 133778363,gi 134085706             | 60,803.10 | 99.80%  | 2 | 2 | 3 | 0.03% | 11.60% | YEELQV 2.67<br>TAGR                                      | 1,165.58 |
| ATP | 6011 | tubulin, beta                                                       | gi 114052731,gi 146231774,gi 86823832 | 49,652.60 | 100.00% | 3 | 3 | 6 | 0.07% | 46.60% | AILVDLE 4<br>PGTMDS<br>VR                                | 1,631.83 |
| ATP | 6011 | tubulin, beta                                                       | gi 114052731,gi 146231774,gi 86823832 | 49,652.60 | 100.00% | 3 | 3 | 6 | 0.07% | 46.60% | ALTVPE 3.57<br>LTQQVF<br>DAK                             | 1,659.90 |
| ATP | 6011 | tubulin, beta                                                       | gi 114052731,gi 146231774,gi 86823832 | 49,652.60 | 100.00% | 3 | 3 | 6 | 0.07% | 46.60% | EAESCD 3.88<br>CLQGFQ<br>LTHSLG<br>GGTGSG<br>MGTLIS<br>K | 3,213.49 |
| ATP | 6011 | tubulin, beta                                                       | gi 114052731,gi 146231774,gi 86823832 | 49,652.60 | 100.00% | 3 | 3 | 6 | 0.07% | 46.60% | EVDEQM 2.82<br>LNVQNK                                    | 1,462.68 |
| ATP | 6011 | tubulin, beta                                                       | gi 114052731,gi 146231774,gi 86823832 | 49,652.60 | 100.00% | 3 | 3 | 6 | 0.07% | 46.60% | GHYTEG 3.5<br>AELVDS<br>VLDVVR                           | 1,958.98 |
| ATP | 6011 | tubulin, beta                                                       | gi 114052731,gi 146231774,gi 86823832 | 49,652.60 | 100.00% | 3 | 3 | 6 | 0.07% | 46.60% | GHYTEG 3.56<br>AELVDS<br>VLDVVR<br>K                     | 2,087.08 |
| ATP | 6011 | tubulin, beta                                                       | gi 114052731,gi 146231774,gi 86823832 | 49,652.60 | 100.00% | 3 | 3 | 6 | 0.07% | 46.60% | IMNTFSV 3.78<br>VPSPK                                    | 1,335.70 |
| ATP | 6011 | tubulin, beta                                                       | gi 114052731,gi 146231774,gi 86823832 | 49,652.60 | 100.00% | 3 | 3 | 6 | 0.07% | 46.60% | IREEYPD 3.08<br>RIMNTFS<br>VVPSPK                        | 2,394.21 |
| ATP | 6011 | tubulin, beta                                                       | gi 114052731,gi 146231774,gi 86823832 | 49,652.60 | 100.00% | 3 | 3 | 6 | 0.07% | 46.60% | ISEQFTA 3<br>MFR                                         | 1,245.59 |
| ATP | 6011 | tubulin, beta                                                       | gi 114052731,gi 146231774,gi 86823832 | 49,652.60 | 100.00% | 3 | 3 | 6 | 0.07% | 46.60% | ISVYYNE 3.93<br>ATGGK                                    | 1,301.64 |



|     |      |                                                                                                                                                            |                                        |           |         |   |   |   |       |        |                                                                      |          |
|-----|------|------------------------------------------------------------------------------------------------------------------------------------------------------------|----------------------------------------|-----------|---------|---|---|---|-------|--------|----------------------------------------------------------------------|----------|
| ATP | 6011 | tubulin, beta                                                                                                                                              | gi 114052731,gi 146231774,gi 86823832  | 49,652.60 | 100.00% | 3 | 3 | 6 | 0.07% | 46.60% | LAVNMV 3.53<br>PFPR                                                  | 1,159.63 |
| ATP | 6011 | tubulin, beta                                                                                                                                              | gi 114052731,gi 146231774,gi 86823832  | 49,652.60 | 100.00% | 3 | 3 | 6 | 0.07% | 46.60% | LHFFMP 3.38<br>GFAPLTS<br>R                                          | 1,636.83 |
| ATP | 6011 | tubulin, beta                                                                                                                                              | gi 114052731,gi 146231774,gi 86823832  | 49,652.60 | 100.00% | 3 | 3 | 6 | 0.07% | 46.60% | VSDTVV 4.25<br>EPYNAT<br>LSVHQL<br>VENTDE<br>TYCIDNE<br>ALYDICF<br>R | 4,479.06 |
| ATP | 6011 | tubulin, beta                                                                                                                                              | gi 114052731,gi 146231774,gi 86823832  | 49,652.60 | 100.00% | 3 | 3 | 6 | 0.07% | 46.60% | YLTVA 2.56<br>VFR                                                    | 1,039.59 |
| ATP | 6011 | melanoma cell adhesion molecule                                                                                                                            | gi 2323281                             | 9,468.30  | 99.80%  | 2 | 3 | 6 | 0.07% | 22.10% | SDKLPEE 4.99<br>MGLLQG<br>SSGDK                                      | 1,906.91 |
| ATP | 6011 | melanoma cell adhesion molecule                                                                                                                            | gi 2323281                             | 9,468.30  | 99.80%  | 2 | 3 | 6 | 0.07% | 22.10% | SDKLPEE 4.4<br>MGLLQG<br>SSGDKR                                      | 2,063.01 |
| ATP | 6011 | RecName :<br>Full=Ornithine<br>aminotransferase,<br>mitochondrial;<br>AltName:<br>Full=Ornithine--<br>oxo-acid<br>aminotransferase;<br>Flags:<br>Precursor | gi 122140925,gi 73586966,gi 77735431   | 48,058.30 | 99.80%  | 2 | 2 | 2 | 0.02% | 5.24%  | GLLNAIV 2.78<br>IR                                                   | 968.6252 |
| ATP | 6011 | RecName :<br>Full=Ornithine<br>aminotransferase,<br>mitochondrial;<br>AltName:<br>Full=Ornithine--<br>oxo-acid<br>aminotransferase;<br>Flags:<br>Precursor | gi 122140925,gi 73586966,gi 77735431   | 48,058.30 | 99.80%  | 2 | 2 | 2 | 0.02% | 5.24%  | TVQGPP 3.64<br>SSDYIFER                                              | 1,595.77 |
| ATP | 6011 | RAP2B protein                                                                                                                                              | gi 134025188,gi 154425870,gi 156523174 | 20,470.40 | 99.80%  | 2 | 2 | 2 | 0.02% | 22.40% | EIEVDSS 2.8<br>PSVLEIL<br>DTAGTE<br>QFASMR                           | 2,840.35 |

|     |      |                                                         |                                              |            |         |    |    |     |       |        |                                      |      |          |
|-----|------|---------------------------------------------------------|----------------------------------------------|------------|---------|----|----|-----|-------|--------|--------------------------------------|------|----------|
| ATP | 6011 | RAP2B protein                                           | gi 134025188,gi 154425870,gi 156523174       | 20,470.40  | 99.80%  | 2  | 2  | 2   | 0.02% | 22.40% | VDLEGE<br>REVSFG<br>EGK              | 2.59 | 1,650.80 |
| ATP | 6011 | Hemoglobin, gamma 2                                     | gi 158455008,gi 160333301,gi 393,gi 62460494 | 15,841.20  | 100.00% | 3  | 5  | 106 | 1.16% | 25.50% | LLGNVL<br>VVVLAR                     | 5.08 | 1,265.83 |
| ATP | 6011 | Hemoglobin, gamma 2                                     | gi 158455008,gi 160333301,gi 393,gi 62460494 | 15,841.20  | 100.00% | 3  | 5  | 106 | 1.16% | 25.50% | VKVDEV<br>GGEALG<br>R                | 3.74 | 1,328.72 |
| ATP | 6011 | Hemoglobin, gamma 2                                     | gi 158455008,gi 160333301,gi 393,gi 62460494 | 15,841.20  | 100.00% | 3  | 5  | 106 | 1.16% | 25.50% | VVTGVA<br>NALAHR                     | 2.96 | 1,207.69 |
| ATP | 6011 | PREDICTED: filamin A, alpha (actin binding protein 280) | gi 194680254                                 | 276,424.10 | 100.00% | 10 | 10 | 10  | 0.11% | 6.99%  | AFGPGL<br>QGSAG<br>SPAR              | 4.44 | 1,429.72 |
| ATP | 6011 | PREDICTED: filamin A, alpha (actin binding protein 280) | gi 194680254                                 | 276,424.10 | 100.00% | 10 | 10 | 10  | 0.11% | 6.99%  | ANLPQS<br>FQVDTS<br>K                | 3.37 | 1,434.72 |
| ATP | 6011 | PREDICTED: filamin A, alpha (actin binding protein 280) | gi 194680254                                 | 276,424.10 | 100.00% | 10 | 10 | 10  | 0.11% | 6.99%  | AYGPGIE<br>PTGNMV<br>K               | 3.34 | 1,449.70 |
| ATP | 6011 | PREDICTED: filamin A, alpha (actin binding protein 280) | gi 194680254                                 | 276,424.10 | 100.00% | 10 | 10 | 10  | 0.11% | 6.99%  | FNEEHIP<br>DSPFVV<br>PVASPS<br>GDAR  | 3.65 | 2,467.19 |
| ATP | 6011 | PREDICTED: filamin A, alpha (actin binding protein 280) | gi 194680254                                 | 276,424.10 | 100.00% | 10 | 10 | 10  | 0.11% | 6.99%  | GAGTGG<br>LGLAVE<br>GPSEAK           | 4.4  | 1,570.81 |
| ATP | 6011 | PREDICTED: filamin A, alpha (actin binding protein 280) | gi 194680254                                 | 276,424.10 | 100.00% | 10 | 10 | 10  | 0.11% | 6.99%  | GLVEPV<br>DVVDNA<br>DGTQTV<br>NYVPSR | 2.8  | 2,544.26 |

|     |      |                                                            |                                       |            |         |    |    |    |       |        |                                    |      |          |
|-----|------|------------------------------------------------------------|---------------------------------------|------------|---------|----|----|----|-------|--------|------------------------------------|------|----------|
| ATP | 6011 | PREDICTED:<br>filamin A, alpha (actin binding protein 280) | gi 194680254                          | 276,424.10 | 100.00% | 10 | 10 | 10 | 0.11% | 6.99%  | IANLQTDLSDGLR                      | 3.76 | 1,415.75 |
| ATP | 6011 | PREDICTED:<br>filamin A, alpha (actin binding protein 280) | gi 194680254                          | 276,424.10 | 100.00% | 10 | 10 | 10 | 0.11% | 6.99%  | LIALLEVLQSK                        | 2.56 | 1,226.77 |
| ATP | 6011 | PREDICTED:<br>filamin A, alpha (actin binding protein 280) | gi 194680254                          | 276,424.10 | 100.00% | 10 | 10 | 10 | 0.11% | 6.99%  | LPQLPITNFSR                        | 2.24 | 1,285.73 |
| ATP | 6011 | PREDICTED:<br>filamin A, alpha (actin binding protein 280) | gi 194680254                          | 276,424.10 | 100.00% | 10 | 10 | 10 | 0.11% | 6.99%  | VTAQGP<br>GLEPSG<br>NIANK          | 4.28 | 1,652.86 |
| ATP | 6011 | PREDICTED:<br>filamin A, alpha (actin binding protein 280) | gi 194680254                          | 276,424.10 | 100.00% | 10 | 10 | 10 | 0.11% | 6.99%  | YTPVQQ<br>GPVGIN<br>VTYGGD<br>AIPK | 3.98 | 2,274.18 |
| ATP | 6011 | NRAS protein                                               | gi 146186548,gi 148226664             | 21,211.30  | 99.90%  | 2  | 2  | 2  | 0.02% | 11.10% | QGVEDA<br>FYTLVR                   | 3.25 | 1,397.71 |
| ATP | 6011 | NRAS protein                                               | gi 146186548,gi 148226664             | 21,211.30  | 99.90%  | 2  | 2  | 2  | 0.02% | 11.10% | SFADINLYR                          | 2.63 | 1,098.56 |
| ATP | 6011 | synaptosomal-associated protein 23                         | gi 115496868,gi 152941114,gi 83405332 | 23,209.50  | 100.00% | 6  | 9  | 16 | 0.17% | 29.40% | ANQVTD<br>ESLESTR                  | 3.51 | 1,449.68 |
| ATP | 6011 | synaptosomal-associated protein 23                         | gi 115496868,gi 152941114,gi 83405332 | 23,209.50  | 100.00% | 6  | 9  | 16 | 0.17% | 29.40% | ANQVTD<br>ESLESTR<br>R             | 1.85 | 1,605.78 |
| ATP | 6011 | synaptosomal-associated protein 23                         | gi 115496868,gi 152941114,gi 83405332 | 23,209.50  | 100.00% | 6  | 9  | 16 | 0.17% | 29.40% | ILGLAIE<br>SQDAGI<br>K             | 4.37 | 1,427.81 |
| ATP | 6011 | synaptosomal-associated protein 23                         | gi 115496868,gi 152941114,gi 83405332 | 23,209.50  | 100.00% | 6  | 9  | 16 | 0.17% | 29.40% | TITMLDE<br>QGEQLK                  | 4.27 | 1,521.75 |

|     |      |                                                                                                       |                                       |           |         |   |   |    |       |        |                                      |          |
|-----|------|-------------------------------------------------------------------------------------------------------|---------------------------------------|-----------|---------|---|---|----|-------|--------|--------------------------------------|----------|
| ATP | 6011 | synaptosomal-associated protein 23                                                                    | gi 115496868,gi 152941114,gi 83405332 | 23,209.50 | 100.00% | 6 | 9 | 16 | 0.17% | 29.40% | TITMLDE 2.89<br>QGEQLK<br>R          | 1,677.85 |
| ATP | 6011 | synaptosomal-associated protein 23                                                                    | gi 115496868,gi 152941114,gi 83405332 | 23,209.50 | 100.00% | 6 | 9 | 16 | 0.17% | 29.40% | VTNGQP 5.2<br>QQATAG<br>AASGGY<br>IK | 1,918.96 |
| ATP | 6011 | PREDICTED: ubiquitin C isoform 12                                                                     | gi 76638716                           | 77,556.00 | 100.00% | 4 | 5 | 16 | 0.17% | 8.12%  | AKIQDK 2.68<br>EGIPPDQ<br>QR         | 1,722.91 |
| ATP | 6011 | PREDICTED: ubiquitin C isoform 12                                                                     | gi 76638716                           | 77,556.00 | 100.00% | 4 | 5 | 16 | 0.17% | 8.12%  | ESTLHL 3.03<br>VLR                   | 1,067.62 |
| ATP | 6011 | PREDICTED: ubiquitin C isoform 12                                                                     | gi 76638716                           | 77,556.00 | 100.00% | 4 | 5 | 16 | 0.17% | 8.12%  | IQDKEGI 3.33<br>PPDQQR               | 1,523.78 |
| ATP | 6011 | PREDICTED: ubiquitin C isoform 12                                                                     | gi 76638716                           | 77,556.00 | 100.00% | 4 | 5 | 16 | 0.17% | 8.12%  | TITLEVE 2.88<br>PSDTIEN<br>VK        | 1,787.93 |
| ATP | 6011 | TPA: predicted NADPH oxidase-5                                                                        | gi 151427572,gi 155372001             | 86,454.40 | 99.80%  | 2 | 2 | 3  | 0.03% | 3.71%  | AIGLQM 3.78<br>ALDLLA<br>K           | 1,372.79 |
| ATP | 6011 | TPA: predicted NADPH oxidase-5                                                                        | gi 151427572,gi 155372001             | 86,454.40 | 99.80%  | 2 | 2 | 3  | 0.03% | 3.71%  | MAALHI 4.46<br>VEVNLL<br>PSK         | 1,650.92 |
| ATP | 6011 | RecName: Full=Small nuclear ribonucleoprotein Sm D1; Short=Sm-D1; AltName: Full=snRNP core protein D1 | gi 109894869,gi 73586929,gi 78050059  | 13,263.90 | 99.80%  | 2 | 4 | 5  | 0.05% | 27.70% | NREPVQ 4.27<br>LETLSIR               | 1,554.86 |

|     |      |                                                                                                                                                   |                                                  |            |         |    |    |    |       |        |                                     |      |          |
|-----|------|---------------------------------------------------------------------------------------------------------------------------------------------------|--------------------------------------------------|------------|---------|----|----|----|-------|--------|-------------------------------------|------|----------|
| ATP | 6011 | RecName<br>:<br>Full=Sma<br>ll nuclear<br>ribonucle<br>oprotein<br>Sm D1;<br>Short=S<br>m-D1;<br>AltName:<br>Full=snR<br>NP core<br>protein<br>D1 | gi 1098948<br>69,gi 73586<br>929,gi 7805<br>0059 | 13,263.90  | 99.80%  | 2  | 4  | 5  | 0.05% | 27.70% | YFILPDS<br>LPLDTLL<br>VDVEPK        | 4.43 | 2,287.25 |
| ATP | 6011 | RecName<br>:<br>Full=Synt<br>axin-4                                                                                                               | gi 1221400<br>85,gi 74356<br>383,gi 7805<br>0061 | 34,382.50  | 99.80%  | 2  | 2  | 3  | 0.03% | 10.10% | AIEPQKE<br>EADENY<br>NSVNTR         | 4.26 | 2,207.02 |
| ATP | 6011 | RecName<br>:<br>Full=Synt<br>axin-4                                                                                                               | gi 1221400<br>85,gi 74356<br>383,gi 7805<br>0061 | 34,382.50  | 99.80%  | 2  | 2  | 3  | 0.03% | 10.10% | VALVVH<br>PGTAR                     | 3.21 | 1,119.66 |
| ATP | 6011 | PREDIC<br>TED:<br>ATPase,<br>Ca++<br>transporti<br>ng,<br>cardiac<br>muscle,<br>slow<br>twitch 2<br>isoform 1                                     | gi 7663901<br>9                                  | 109,762.30 | 100.00% | 11 | 12 | 14 | 0.15% | 15.50% | AKDIVP<br>GDIVEIA<br>VGDKVP<br>ADIR | 3.51 | 2,390.33 |
| ATP | 6011 | PREDIC<br>TED:<br>ATPase,<br>Ca++<br>transporti<br>ng,<br>cardiac<br>muscle,<br>slow<br>twitch 2<br>isoform 1                                     | gi 7663901<br>9                                  | 109,762.30 | 100.00% | 11 | 12 | 14 | 0.15% | 15.50% | AMGVV<br>VATGVN<br>TEIGK            | 3.68 | 1,561.83 |
| ATP | 6011 | PREDIC<br>TED:<br>ATPase,<br>Ca++<br>transporti<br>ng,<br>cardiac<br>muscle,<br>slow<br>twitch 2<br>isoform 1                                     | gi 7663901<br>9                                  | 109,762.30 | 100.00% | 11 | 12 | 14 | 0.15% | 15.50% | EFTLEFS<br>R                        | 2.04 | 1,028.50 |
| ATP | 6011 | PREDIC<br>TED:<br>ATPase,<br>Ca++<br>transporti<br>ng,<br>cardiac<br>muscle,<br>slow<br>twitch 2<br>isoform 1                                     | gi 7663901<br>9                                  | 109,762.30 | 100.00% | 11 | 12 | 14 | 0.15% | 15.50% | ISLPVIL<br>MDETLK                   | 2.96 | 1,487.84 |

|     |      |                                                                               |            |            |         |    |    |    |       |        |                                         |      |          |
|-----|------|-------------------------------------------------------------------------------|------------|------------|---------|----|----|----|-------|--------|-----------------------------------------|------|----------|
| ATP | 6011 | PREDICTED: ATPase, Ca++ transporting, cardiac muscle, slow twitch 2 isoform 1 | gi 7663901 | 109,762.30 | 100.00% | 11 | 12 | 14 | 0.15% | 15.50% | KSEIGIA<br>MSGSTA<br>VAK                | 4.52 | 1,535.81 |
| ATP | 6011 | PREDICTED: ATPase, Ca++ transporting, cardiac muscle, slow twitch 2 isoform 1 | gi 7663901 | 109,762.30 | 100.00% | 11 | 12 | 14 | 0.15% | 15.50% | LDEFGE<br>QLSK                          | 3.11 | 1,165.57 |
| ATP | 6011 | PREDICTED: ATPase, Ca++ transporting, cardiac muscle, slow twitch 2 isoform 1 | gi 7663901 | 109,762.30 | 100.00% | 11 | 12 | 14 | 0.15% | 15.50% | NAENAIE<br>ALKEYE<br>PEMGK              | 3.03 | 2,051.96 |
| ATP | 6011 | PREDICTED: ATPase, Ca++ transporting, cardiac muscle, slow twitch 2 isoform 1 | gi 7663901 | 109,762.30 | 100.00% | 11 | 12 | 14 | 0.15% | 15.50% | NMLFSG<br>TNIAAG<br>K                   | 3.1  | 1,339.67 |
| ATP | 6011 | PREDICTED: ATPase, Ca++ transporting, cardiac muscle, slow twitch 2 isoform 1 | gi 7663901 | 109,762.30 | 100.00% | 11 | 12 | 14 | 0.15% | 15.50% | SEIGIAM<br>GSGTAV<br>AK                 | 4.59 | 1,407.72 |
| ATP | 6011 | PREDICTED: ATPase, Ca++ transporting, cardiac muscle, slow twitch 2 isoform 1 | gi 7663901 | 109,762.30 | 100.00% | 11 | 12 | 14 | 0.15% | 15.50% | TASEMV<br>LADDNF<br>STIVA<br>AV<br>EEGR | 3.82 | 2,441.15 |

|     |      |                                                                                                                |                                   |            |         |    |    |    |       |        |                                               |      |          |
|-----|------|----------------------------------------------------------------------------------------------------------------|-----------------------------------|------------|---------|----|----|----|-------|--------|-----------------------------------------------|------|----------|
| ATP | 6011 | PREDICTED: ATPase, Ca++ transporting, cardiac muscle, slow twitch 2 isoform 1                                  | gi 7663901                        | 109,762.30 | 100.00% | 11 | 12 | 14 | 0.15% | 15.50% | VDQSILTK<br>GESVSVI                           | 3.61 | 1,574.86 |
| ATP | 6011 | PREDICTED: similar to solute carrier family 7 (cationic amino acid transporter, y+ system), member 2 isoform 2 | gi 1946791                        | 71,681.50  | 100.00% | 3  | 4  | 4  | 0.04% | 6.08%  | DEEDDD<br>EDMYSD<br>NINAAT<br>EEK             | 6.23 | 2,463.91 |
| ATP | 6011 | PREDICTED: similar to solute carrier family 7 (cationic amino acid transporter, y+ system), member 2 isoform 2 | gi 1946791                        | 71,681.50  | 100.00% | 3  | 4  | 4  | 0.04% | 6.08%  | HSLEGN<br>PRDEED<br>DDEDMY<br>SDNINA<br>ATEEK | 6.75 | 3,354.35 |
| ATP | 6011 | PREDICTED: similar to solute carrier family 7 (cationic amino acid transporter, y+ system), member 2 isoform 2 | gi 1946791                        | 71,681.50  | 100.00% | 3  | 4  | 4  | 0.04% | 6.08%  | NLSLPFI<br>FHEK                               | 2.23 | 1,344.73 |
| ATP | 6011 | ENDOD 1 protein                                                                                                | gi 1544255<br>75,gi 15652<br>3150 | 54,851.30  | 100.00% | 4  | 4  | 4  | 0.04% | 9.80%  | FATLYST<br>QHR                                | 2.88 | 1,223.62 |
| ATP | 6011 | ENDOD 1 protein                                                                                                | gi 1544255<br>75,gi 15652<br>3150 | 54,851.30  | 100.00% | 4  | 4  | 4  | 0.04% | 9.80%  | FFYAGT<br>PPAGPA<br>AAAHVR                    | 2.51 | 1,800.92 |
| ATP | 6011 | ENDOD 1 protein                                                                                                | gi 1544255<br>75,gi 15652<br>3150 | 54,851.30  | 100.00% | 4  | 4  | 4  | 0.04% | 9.80%  | ILEVVN<br>QVQDEE<br>R                         | 4.23 | 1,570.81 |
| ATP | 6011 | ENDOD 1 protein                                                                                                | gi 1544255<br>75,gi 15652<br>3150 | 54,851.30  | 100.00% | 4  | 4  | 4  | 0.04% | 9.80%  | IPVYSAF<br>R                                  | 1.89 | 952.525  |

|     |      |                                                                  |                                                      |            |         |   |   |   |       |        |                            |      |          |
|-----|------|------------------------------------------------------------------|------------------------------------------------------|------------|---------|---|---|---|-------|--------|----------------------------|------|----------|
| ATP | 6011 | PREDIC TED: 45<br>similar to hCG1980 844                         | gi 1946749                                           | 298,419.90 | 99.80%  | 2 | 2 | 2 | 0.02% | 0.87%  | QLQPNE<br>EADYLG<br>VR     | 2.91 | 1,631.80 |
| ATP | 6011 | PREDIC TED: 45<br>similar to hCG1980 844                         | gi 1946749                                           | 298,419.90 | 99.80%  | 2 | 2 | 2 | 0.02% | 0.87%  | YLLTQE<br>LLR              | 2.85 | 1,148.67 |
| ATP | 6011 | PREDIC TED: 4<br>similar to karyopherin beta 1 isoform 2         | gi 7664462                                           | 97,210.30  | 100.00% | 3 | 3 | 3 | 0.03% | 5.25%  | AAVENL<br>PTFLVEL<br>SR    | 3.71 | 1,658.91 |
| ATP | 6011 | PREDIC TED: 4<br>similar to karyopherin beta 1 isoform 2         | gi 7664462                                           | 97,210.30  | 100.00% | 3 | 3 | 3 | 0.03% | 5.25%  | LAATNA<br>LLNSLEF<br>TK    | 4.56 | 1,605.88 |
| ATP | 6011 | PREDIC TED: 4<br>similar to karyopherin beta 1 isoform 2         | gi 7664462                                           | 97,210.30  | 100.00% | 3 | 3 | 3 | 0.03% | 5.25%  | LLETTD<br>RPDGHQ<br>NNLR   | 1.54 | 1,878.94 |
| ATP | 6011 | PREDIC TED: 65<br>similar to coiled-coil domain containin g 109A | gi 1199185                                           | 39,876.70  | 100.00% | 4 | 4 | 4 | 0.04% | 14.20% | DLLSHE<br>NAATLN<br>DVK    | 5.01 | 1,639.83 |
| ATP | 6011 | PREDIC TED: 65<br>similar to coiled-coil domain containin g 109A | gi 1199185                                           | 39,876.70  | 100.00% | 4 | 4 | 4 | 0.04% | 14.20% | DRQYLL<br>FFHK             | 3.66 | 1,366.73 |
| ATP | 6011 | PREDIC TED: 65<br>similar to coiled-coil domain containin g 109A | gi 1199185                                           | 39,876.70  | 100.00% | 4 | 4 | 4 | 0.04% | 14.20% | LEDLKE<br>QLAPLE<br>K      | 4.47 | 1,525.85 |
| ATP | 6011 | PREDIC TED: 65<br>similar to coiled-coil domain containin g 109A | gi 1199185                                           | 39,876.70  | 100.00% | 4 | 4 | 4 | 0.04% | 14.20% | LRDPLQ<br>VHLPLR           | 3.54 | 1,456.87 |
| ATP | 6011 | sorting and assembly machiner y compone nt 50 homolog            | gi 1140510<br>and 51.gi 87578<br>317.gi 9576<br>9210 | 52,025.30  | 99.80%  | 2 | 3 | 3 | 0.03% | 5.33%  | ETSYGL<br>SFFKPQP<br>GNFDR | 3.23 | 2,090.00 |



|     |      |                                                                            |                                                                   |            |         |   |   |   |       |        |                                   |      |          |
|-----|------|----------------------------------------------------------------------------|-------------------------------------------------------------------|------------|---------|---|---|---|-------|--------|-----------------------------------|------|----------|
| ATP | 6011 | sorting<br>and<br>assembly<br>machiner<br>y<br>compon<br>ent 50<br>homolog | gi 1140510<br>51,gi 87578<br>317,gi 9576<br>9210                  | 52,025.30  | 99.80%  | 2 | 3 | 3 | 0.03% | 5.33%  | LPNLLG<br>R                       | 1.99 | 782.4884 |
| ATP | 6011 | PREDIC<br>TED:<br>similar to<br>ephrin<br>receptor<br>EphA2                | gi 1198889<br>53                                                  | 107,900.50 | 100.00% | 5 | 5 | 5 | 0.05% | 6.05%  | FADIVSI<br>LDK                    | 3.04 | 1,120.63 |
| ATP | 6011 | PREDIC<br>TED:<br>similar to<br>ephrin<br>receptor<br>EphA2                | gi 1198889<br>53                                                  | 107,900.50 | 100.00% | 5 | 5 | 5 | 0.05% | 6.05%  | IAYSLG<br>LK                      | 2.61 | 977.6031 |
| ATP | 6011 | PREDIC<br>TED:<br>similar to<br>ephrin<br>receptor<br>EphA2                | gi 1198889<br>53                                                  | 107,900.50 | 100.00% | 5 | 5 | 5 | 0.05% | 6.05%  | IDTIAPD<br>EITGSSD<br>FEAR        | 3.69 | 1,936.91 |
| ATP | 6011 | PREDIC<br>TED:<br>similar to<br>ephrin<br>receptor<br>EphA2                | gi 1198889<br>53                                                  | 107,900.50 | 100.00% | 5 | 5 | 5 | 0.05% | 6.05%  | VIGAGEF<br>GEVYK                  | 3.3  | 1,268.65 |
| ATP | 6011 | PREDIC<br>TED:<br>similar to<br>ephrin<br>receptor<br>EphA2                | gi 1198889<br>53                                                  | 107,900.50 | 100.00% | 5 | 5 | 5 | 0.05% | 6.05%  | YSEPLG<br>LTR                     | 2.35 | 1,132.60 |
| ATP | 6011 | Progester<br>one<br>receptor<br>membran<br>e<br>compon<br>ent 1            | gi 1096593<br>85,gi 11549<br>5221,gi 116<br>248575,gi 7<br>689365 | 21,605.30  | 100.00% | 3 | 3 | 4 | 0.04% | 17.50% | FYGPEG<br>PYGVFA<br>GR            | 3.52 | 1,516.72 |
| ATP | 6011 | Progester<br>one<br>receptor<br>membran<br>e<br>compon<br>ent 1            | gi 1096593<br>85,gi 11549<br>5221,gi 116<br>248575,gi 7<br>689365 | 21,605.30  | 100.00% | 3 | 3 | 4 | 0.04% | 17.50% | GDQPAA<br>SDSDDD<br>EPPPLPR       | 3.72 | 1,978.86 |
| ATP | 6011 | Progester<br>one<br>receptor<br>membran<br>e<br>compon<br>ent 1            | gi 1096593<br>85,gi 11549<br>5221,gi 116<br>248575,gi 7<br>689365 | 21,605.30  | 100.00% | 3 | 3 | 4 | 0.04% | 17.50% | KFYGPE<br>GPYGVF<br>AGR           | 4.33 | 1,644.82 |
| ATP | 6011 | similar to<br>ribosomal<br>protein<br>L27                                  | gi 2818971<br>7,gi 471170<br>99,gi 74268<br>027,gi 7740<br>4275   | 15,780.40  | 99.80%  | 2 | 2 | 2 | 0.02% | 22.10% | NIDDGTS<br>DRPYSH<br>ALVAGI<br>DR | 3.72 | 2,272.10 |
| ATP | 6011 | similar to<br>ribosomal<br>protein<br>L27                                  | gi 2818971<br>7,gi 471170<br>99,gi 74268<br>027,gi 7740<br>4275   | 15,780.40  | 99.80%  | 2 | 2 | 2 | 0.02% | 22.10% | YSVDIPL<br>DK                     | 2.43 | 1,049.55 |

|     |      |                                                            |                                                                |           |         |   |   |    |       |        |                                                  |          |
|-----|------|------------------------------------------------------------|----------------------------------------------------------------|-----------|---------|---|---|----|-------|--------|--------------------------------------------------|----------|
| ATP | 6011 | PREDIC TED: 28<br>heat shock 60kDa protein 1 (chaperon in) | gi 1198882                                                     | 75,015.00 | 100.00% | 6 | 7 | 7  | 0.08% | 12.80% | GVMLAV 1.88<br>DAVIAEL<br>KK                     | 1,572.90 |
| ATP | 6011 | PREDIC TED: 28<br>heat shock 60kDa protein 1 (chaperon in) | gi 1198882                                                     | 75,015.00 | 100.00% | 6 | 7 | 7  | 0.08% | 12.80% | ISSVQSI 3.63<br>VPALEIA<br>NAHR                  | 1,905.06 |
| ATP | 6011 | PREDIC TED: 28<br>heat shock 60kDa protein 1 (chaperon in) | gi 1198882                                                     | 75,015.00 | 100.00% | 6 | 7 | 7  | 0.08% | 12.80% | KISSVQS 2.93<br>IVPALEI<br>ANAHR                 | 2,033.15 |
| ATP | 6011 | PREDIC TED: 28<br>heat shock 60kDa protein 1 (chaperon in) | gi 1198882                                                     | 75,015.00 | 100.00% | 6 | 7 | 7  | 0.08% | 12.80% | LVQDVA 5.89<br>NNTNEE<br>AGDGTT<br>TATVLA<br>R   | 2,560.25 |
| ATP | 6011 | PREDIC TED: 28<br>heat shock 60kDa protein 1 (chaperon in) | gi 1198882                                                     | 75,015.00 | 100.00% | 6 | 7 | 7  | 0.08% | 12.80% | TLNDEL 2.52<br>EIIEGMK<br>FDR                    | 1,938.95 |
| ATP | 6011 | PREDIC TED: 28<br>heat shock 60kDa protein 1 (chaperon in) | gi 1198882                                                     | 75,015.00 | 100.00% | 6 | 7 | 7  | 0.08% | 12.80% | VGEVIV 2.4<br>TKDDAM<br>LLK                      | 1,646.90 |
| ATP | 6011 | CYB5R3 protein                                             | gi 1488774<br>41,gi 15715<br>1718,gi 162<br>941,gi 1709<br>233 | 33,973.70 | 100.00% | 7 | 8 | 13 | 0.14% | 35.00% | DILLRPE 1.77<br>LEELRN<br>EHSAR                  | 2,190.16 |
| ATP | 6011 | CYB5R3 protein                                             | gi 1488774<br>41,gi 15715<br>1718,gi 162<br>941,gi 1709<br>233 | 33,973.70 | 100.00% | 7 | 8 | 13 | 0.14% | 35.00% | GPNGLL 3.73<br>VYQGK                             | 1,145.63 |
| ATP | 6011 | CYB5R3 protein                                             | gi 1488774<br>41,gi 15715<br>1718,gi 162<br>941,gi 1709<br>233 | 33,973.70 | 100.00% | 7 | 8 | 13 | 0.14% | 35.00% | IDGNLVI 2.87<br>RPYTPV<br>SSDDDK<br>GFVDLVI<br>K | 2,975.57 |
| ATP | 6011 | CYB5R3 protein                                             | gi 1488774<br>41,gi 15715<br>1718,gi 162<br>941,gi 1709<br>233 | 33,973.70 | 100.00% | 7 | 8 | 13 | 0.14% | 35.00% | LIDKEVI 3.27<br>SHDTR                            | 1,425.77 |

|     |      |                                           |                                                                |            |         |    |    |    |       |        |                                      |      |          |
|-----|------|-------------------------------------------|----------------------------------------------------------------|------------|---------|----|----|----|-------|--------|--------------------------------------|------|----------|
| ATP | 6011 | CYB5R3 protein                            | gi 1488774<br>41.gi 15715<br>1718.gi 162<br>941.gi 1709<br>233 | 33,973.70  | 100.00% | 7  | 8  | 13 | 0.14% | 35.00% | LIDKEVI<br>SHDTRR                    | 2.63 | 1,581.87 |
| ATP | 6011 | CYB5R3 protein                            | gi 1488774<br>41.gi 15715<br>1718.gi 162<br>941.gi 1709<br>233 | 33,973.70  | 100.00% | 7  | 8  | 13 | 0.14% | 35.00% | STPAITL<br>ENPDIKY<br>PLR            | 4.64 | 1,928.05 |
| ATP | 6011 | CYB5R3 protein                            | gi 1488774<br>41.gi 15715<br>1718.gi 162<br>941.gi 1709<br>233 | 33,973.70  | 100.00% | 7  | 8  | 13 | 0.14% | 35.00% | SVGMI<br>GGTGITP<br>MLQVIR           | 5.47 | 1,917.03 |
| ATP | 6011 | endothelial cell adhesion molecule        | gi 1181512<br>18.gi 11991<br>9027.gi 868<br>23868              | 41,779.80  | 99.80%  | 2  | 3  | 4  | 0.04% | 10.10% | ALEEPA<br>NDIKED<br>AIAPR            | 4.6  | 1,851.94 |
| ATP | 6011 | endothelial cell adhesion molecule        | gi 1181512<br>18.gi 11991<br>9027.gi 868<br>23868              | 41,779.80  | 99.80%  | 2  | 3  | 4  | 0.04% | 10.10% | SPSSQV<br>FFAPVL<br>DAIHGSL<br>SLK   | 3.6  | 2,397.28 |
| ATP | 6011 | PREDICTED: heparan sulfate proteoglycan 2 | gi 1198889<br>79                                               | 467,987.40 | 100.00% | 6  | 6  | 6  | 0.07% | 2.46%  | HPTPLAL<br>GQFHTV<br>TLLR            | 3.3  | 1,901.08 |
| ATP | 6011 | PREDICTED: heparan sulfate proteoglycan 2 | gi 1198889<br>79                                               | 467,987.40 | 100.00% | 6  | 6  | 6  | 0.07% | 2.46%  | IPGDQV<br>VSVVFIK                    | 3.94 | 1,400.81 |
| ATP | 6011 | PREDICTED: heparan sulfate proteoglycan 2 | gi 1198889<br>79                                               | 467,987.40 | 100.00% | 6  | 6  | 6  | 0.07% | 2.46%  | IQVVVLP<br>GATTPP<br>VR              | 4.07 | 1,546.93 |
| ATP | 6011 | PREDICTED: heparan sulfate proteoglycan 2 | gi 1198889<br>79                                               | 467,987.40 | 100.00% | 6  | 6  | 6  | 0.07% | 2.46%  | LDVEFK<br>PLAPDG<br>VLLFSG<br>GK     | 3.78 | 2,102.15 |
| ATP | 6011 | PREDICTED: heparan sulfate proteoglycan 2 | gi 1198889<br>79                                               | 467,987.40 | 100.00% | 6  | 6  | 6  | 0.07% | 2.46%  | LRSPVISI<br>DPPSSTV<br>QQGQDA<br>SFK | 6.09 | 2,557.33 |
| ATP | 6011 | PREDICTED: heparan sulfate proteoglycan 2 | gi 1198889<br>79                                               | 467,987.40 | 100.00% | 6  | 6  | 6  | 0.07% | 2.46%  | VVPYFT<br>QTPYSFL<br>PLPTIK          | 2.93 | 2,211.21 |
| ATP | 6011 | PREDICTED: keratin isoform 8              | gi 1946761<br>68                                               | 51,863.50  | 100.00% | 12 | 13 | 22 | 0.24% | 29.60% | ALEEAN<br>ADLEVK                     | 3.16 | 1,301.66 |
| ATP | 6011 | PREDICTED: keratin isoform 8              | gi 1946761<br>68                                               | 51,863.50  | 100.00% | 12 | 13 | 22 | 0.24% | 29.60% | ASLENSL<br>EETK                      | 2.39 | 1,220.60 |

|     |      |                                  |                                        |           |         |    |    |    |       |        |                                                     |          |
|-----|------|----------------------------------|----------------------------------------|-----------|---------|----|----|----|-------|--------|-----------------------------------------------------|----------|
| ATP | 6011 | PREDIC TED: keratin 19 isoform 8 | gi 194676168                           | 51,863.50 | 100.00% | 12 | 13 | 22 | 0.24% | 29.60% | ASLENSL 3.77<br>EETKGR                              | 1,433.72 |
| ATP | 6011 | PREDIC TED: keratin 19 isoform 8 | gi 194676168                           | 51,863.50 | 100.00% | 12 | 13 | 22 | 0.24% | 29.60% | GQVGGD 3.51<br>VNVEMD<br>AAPGVD<br>LSR              | 2,101.98 |
| ATP | 6011 | PREDIC TED: keratin 19 isoform 8 | gi 194676168                           | 51,863.50 | 100.00% | 12 | 13 | 22 | 0.24% | 29.60% | ILNEMR 3.5<br>DQYEK                                 | 1,438.70 |
| ATP | 6011 | PREDIC TED: keratin 19 isoform 8 | gi 194676168                           | 51,863.50 | 100.00% | 12 | 13 | 22 | 0.24% | 29.60% | LASYLD 3.26<br>KVR                                  | 1,064.61 |
| ATP | 6011 | PREDIC TED: keratin 19 isoform 8 | gi 194676168                           | 51,863.50 | 100.00% | 12 | 13 | 22 | 0.24% | 29.60% | LEQEIAT 3.71<br>YR                                  | 1,122.58 |
| ATP | 6011 | PREDIC TED: keratin 19 isoform 8 | gi 194676168                           | 51,863.50 | 100.00% | 12 | 13 | 22 | 0.24% | 29.60% | LLEGED 5.46<br>AHLSSS<br>QFSSGS<br>QSSR             | 2,309.06 |
| ATP | 6011 | PREDIC TED: keratin 19 isoform 8 | gi 194676168                           | 51,863.50 | 100.00% | 12 | 13 | 22 | 0.24% | 29.60% | QRPAEIK 3.12<br>DYSPYF<br>K                         | 1,741.89 |
| ATP | 6011 | PREDIC TED: keratin 19 isoform 8 | gi 194676168                           | 51,863.50 | 100.00% | 12 | 13 | 22 | 0.24% | 29.60% | TEELNR 6.01<br>EVATNS<br>ELVQSG<br>K                | 2,104.05 |
| ATP | 6011 | PREDIC TED: keratin 19 isoform 8 | gi 194676168                           | 51,863.50 | 100.00% | 12 | 13 | 22 | 0.24% | 29.60% | TRLEQEI 3.46<br>ATYR                                | 1,379.73 |
| ATP | 6011 | PREDIC TED: keratin 19 isoform 8 | gi 194676168                           | 51,863.50 | 100.00% | 12 | 13 | 22 | 0.24% | 29.60% | VLDELTA 4.3<br>LAR                                  | 1,029.59 |
| ATP | 6011 | PTBP1 protein                    | gi 158454983                           | 47,010.90 | 99.80%  | 2  | 2  | 2  | 0.02% | 8.97%  | KLPGDV 3.35<br>TEGEVIS<br>LGLPFG<br>K               | 2,056.13 |
| ATP | 6011 | PTBP1 protein                    | gi 158454983                           | 47,010.90 | 99.80%  | 2  | 2  | 2  | 0.02% | 8.97%  | NNQFQA 3.47<br>LLQYAD<br>PVSAQH<br>AK               | 2,243.12 |
| ATP | 6011 | Transmembrane protein 49         | gi 111307060,gi 115496266,gi 122133514 | 46,165.40 | 99.80%  | 2  | 2  | 3  | 0.03% | 11.30% | EQYNGN 4.07<br>FTDPSSV<br>NEK                       | 1,828.80 |
| ATP | 6011 | Transmembrane protein 49         | gi 111307060,gi 115496266,gi 122133514 | 46,165.40 | 99.80%  | 2  | 2  | 3  | 0.03% | 11.30% | LSGAEP 5.55<br>DDEEYQ<br>EFEEML<br>EHAETA<br>QDFASR | 3,489.46 |
| ATP | 6011 | KRT5 protein                     | gi 146186887,gi 56710317               | 62,920.60 | 100.00% | 8  | 12 | 55 | 0.60% | 13.00% | FASFIDK 2.21                                        | 827.4298 |

|     |      |                                                               |                                                    |            |         |   |    |    |       |        |                                        |          |
|-----|------|---------------------------------------------------------------|----------------------------------------------------|------------|---------|---|----|----|-------|--------|----------------------------------------|----------|
| ATP | 6011 | KRT5<br>protein                                               | gi 1461868<br>87,gi 56710<br>317                   | 62,920.60  | 100.00% | 8 | 12 | 55 | 0.60% | 13.00% | FASFIDK 1.68<br>VR                     | 1,082.60 |
| ATP | 6011 | KRT5<br>protein                                               | gi 1461868<br>87,gi 56710<br>317                   | 62,920.60  | 100.00% | 8 | 12 | 55 | 0.60% | 13.00% | LALDVEI 3.01<br>ATYR                   | 1,263.69 |
| ATP | 6011 | KRT5<br>protein                                               | gi 1461868<br>87,gi 56710<br>317                   | 62,920.60  | 100.00% | 8 | 12 | 55 | 0.60% | 13.00% | LRSEIDN 3.61<br>VKK                    | 1,201.69 |
| ATP | 6011 | KRT5<br>protein                                               | gi 1461868<br>87,gi 56710<br>317                   | 62,920.60  | 100.00% | 8 | 12 | 55 | 0.60% | 13.00% | NKYEDE 3.37<br>INKR                    | 1,308.65 |
| ATP | 6011 | KRT5<br>protein                                               | gi 1461868<br>87,gi 56710<br>317                   | 62,920.60  | 100.00% | 8 | 12 | 55 | 0.60% | 13.00% | SFSTASA 3.46<br>ITPSVSR                | 1,410.72 |
| ATP | 6011 | KRT5<br>protein                                               | gi 1461868<br>87,gi 56710<br>317                   | 62,920.60  | 100.00% | 8 | 12 | 55 | 0.60% | 13.00% | SLDLDSII 3.79<br>AEVK                  | 1,302.72 |
| ATP | 6011 | KRT5<br>protein                                               | gi 1461868<br>87,gi 56710<br>317                   | 62,920.60  | 100.00% | 8 | 12 | 55 | 0.60% | 13.00% | VDALMD 3.52<br>EINFMK                  | 1,441.67 |
| ATP | 6011 | PREDIC<br>TED:<br>similar to<br>CG2943-<br>CG2943-<br>PA      | gi 1198889<br>13                                   | 115,925.80 | 100.00% | 2 | 2  | 2  | 0.02% | 2.80%  | FNVEDG 2.81<br>EIVQQV<br>R             | 1,532.77 |
| ATP | 6011 | PREDIC<br>TED:<br>similar to<br>CG2943-<br>CG2943-<br>PA      | gi 1198889<br>13                                   | 115,925.80 | 100.00% | 2 | 2  | 2  | 0.02% | 2.80%  | NFPQAA 3.8<br>LVSFATT<br>GEK           | 1,680.86 |
| ATP | 6011 | SFXN3<br>protein                                              | gi 1515541<br>23,gi 15612<br>0541,gi 206<br>558262 | 35,690.00  | 100.00% | 3 | 3  | 3  | 0.03% | 14.00% | AQIQEQ 4<br>NPSIEVV<br>YYNK            | 2,023.01 |
| ATP | 6011 | SFXN3<br>protein                                              | gi 1515541<br>23,gi 15612<br>0541,gi 206<br>558262 | 35,690.00  | 100.00% | 3 | 3  | 3  | 0.03% | 14.00% | ELQVGIP 2.83<br>VTNEQG<br>QR           | 1,667.87 |
| ATP | 6011 | SFXN3<br>protein                                              | gi 1515541<br>23,gi 15612<br>0541,gi 206<br>558262 | 35,690.00  | 100.00% | 3 | 3  | 3  | 0.03% | 14.00% | NLLLSG 3.19<br>AQLEAS<br>R             | 1,371.76 |
| ATP | 6011 | RAB21,<br>member<br>RAS<br>oncogene<br>family                 | gi 1096581<br>86,gi 11549<br>6760,gi 122<br>144675 | 24,128.60  | 99.80%  | 2 | 2  | 2  | 0.02% | 12.20% | FHALGPI 2.47<br>YYR                    | 1,236.65 |
| ATP | 6011 | RAB21,<br>member<br>RAS<br>oncogene<br>family                 | gi 1096581<br>86,gi 11549<br>6760,gi 122<br>144675 | 24,128.60  | 99.80%  | 2 | 2  | 2  | 0.02% | 12.20% | HVSIQEA 2.95<br>ESYAES<br>VGAK         | 1,804.87 |
| ATP | 6011 | 2',5'-<br>oligoaden<br>ylate<br>synthetas<br>e 1,<br>40/46kDa | gi 1584549<br>90,gi 37953<br>332,gi 9496<br>7004   | 45,118.40  | 99.90%  | 2 | 2  | 2  | 0.02% | 9.51%  | LNQAVE 5.15<br>FDVLPA<br>FDALGQ<br>LTK | 2,289.21 |
| ATP | 6011 | 2',5'-<br>oligoaden<br>ylate<br>synthetas<br>e 1,<br>40/46kDa | gi 1584549<br>90,gi 37953<br>332,gi 9496<br>7004   | 45,118.40  | 99.90%  | 2 | 2  | 2  | 0.02% | 9.51%  | PVILDPA 3.64<br>DPTGNV<br>AGK          | 1,563.84 |

|     |      |                                                              |                                                                                                                                                                          |           |         |    |    |    |       |        |                                                |      |          |
|-----|------|--------------------------------------------------------------|--------------------------------------------------------------------------------------------------------------------------------------------------------------------------|-----------|---------|----|----|----|-------|--------|------------------------------------------------|------|----------|
| ATP | 6011 | ARP3<br>actin-<br>related<br>protein 3<br>homolog<br>(yeast) | gi 1153048<br>56,gi 14874<br>4289,gi 149<br>243031,gi 1<br>49243038,g<br>i 14924304<br>5,gi 149243<br>052,gi 1492<br>43059,gi 21<br>7422,gi 278<br>06335,gi 47<br>117646 | 47,353.80 | 99.80%  | 2  | 2  | 2  | 0.02% | 7.66%  | AEPEDH<br>YFLLTEP<br>PLNTPE<br>NR              | 3.18 | 2,482.19 |
| ATP | 6011 | ARP3<br>actin-<br>related<br>protein 3<br>homolog<br>(yeast) | gi 1153048<br>56,gi 14874<br>4289,gi 149<br>243031,gi 1<br>49243038,g<br>i 14924304<br>5,gi 149243<br>052,gi 1492<br>43059,gi 21<br>7422,gi 278<br>06335,gi 47<br>117646 | 47,353.80 | 99.80%  | 2  | 2  | 2  | 0.02% | 7.66%  | DITYFIQ<br>QLLR                                | 3.36 | 1,409.78 |
| ATP | 6011 | Actin,<br>gamma 1                                            | gi 1515543<br>60,gi 74354<br>242,gi 7581<br>2932                                                                                                                         | 41,775.90 | 100.00% | 14 | 21 | 49 | 0.53% | 49.30% | AVFPSIV<br>GRPR                                | 3.04 | 1,198.71 |
| ATP | 6011 | Actin,<br>gamma 1                                            | gi 1515543<br>60,gi 74354<br>242,gi 7581<br>2932                                                                                                                         | 41,775.90 | 100.00% | 14 | 21 | 49 | 0.53% | 49.30% | DLTDYL<br>MK                                   | 2.34 | 1,014.48 |
| ATP | 6011 | Actin,<br>gamma 1                                            | gi 1515543<br>60,gi 74354<br>242,gi 7581<br>2932                                                                                                                         | 41,775.90 | 100.00% | 14 | 21 | 49 | 0.53% | 49.30% | DLYANT<br>VLSGGT<br>TMYPGI<br>ADR              | 5.59 | 2,231.07 |
| ATP | 6011 | Actin,<br>gamma 1                                            | gi 1515543<br>60,gi 74354<br>242,gi 7581<br>2932                                                                                                                         | 41,775.90 | 100.00% | 14 | 21 | 49 | 0.53% | 49.30% | EITALAP<br>STMK                                | 3.13 | 1,177.61 |
| ATP | 6011 | Actin,<br>gamma 1                                            | gi 1515543<br>60,gi 74354<br>242,gi 7581<br>2932                                                                                                                         | 41,775.90 | 100.00% | 14 | 21 | 49 | 0.53% | 49.30% | FRCPEAL<br>FQPSFLG<br>MESCGI<br>HETTFN<br>SIMK | 4.42 | 3,436.58 |
| ATP | 6011 | Actin,<br>gamma 1                                            | gi 1515543<br>60,gi 74354<br>242,gi 7581<br>2932                                                                                                                         | 41,775.90 | 100.00% | 14 | 21 | 49 | 0.53% | 49.30% | GYSFTT<br>TAER                                 | 3.61 | 1,132.53 |
| ATP | 6011 | Actin,<br>gamma 1                                            | gi 1515543<br>60,gi 74354<br>242,gi 7581<br>2932                                                                                                                         | 41,775.90 | 100.00% | 14 | 21 | 49 | 0.53% | 49.30% | IKIAPPE<br>R                                   | 2.45 | 1,036.65 |
| ATP | 6011 | Actin,<br>gamma 1                                            | gi 1515543<br>60,gi 74354<br>242,gi 7581<br>2932                                                                                                                         | 41,775.90 | 100.00% | 14 | 21 | 49 | 0.53% | 49.30% | KDLYAN<br>TVLSGG<br>TTMYPG<br>IADR             | 6.65 | 2,359.16 |
| ATP | 6011 | Actin,<br>gamma 1                                            | gi 1515543<br>60,gi 74354<br>242,gi 7581<br>2932                                                                                                                         | 41,775.90 | 100.00% | 14 | 21 | 49 | 0.53% | 49.30% | LDLAGR<br>DLTDYL<br>MK                         | 3    | 1,639.84 |
| ATP | 6011 | Actin,<br>gamma 1                                            | gi 1515543<br>60,gi 74354<br>242,gi 7581<br>2932                                                                                                                         | 41,775.90 | 100.00% | 14 | 21 | 49 | 0.53% | 49.30% | QEYDES<br>GPSIVHR                              | 3.01 | 1,516.70 |

|     |      |                                                                                                                                                    |                                                              |           |         |    |    |    |       |        |                                                |      |          |
|-----|------|----------------------------------------------------------------------------------------------------------------------------------------------------|--------------------------------------------------------------|-----------|---------|----|----|----|-------|--------|------------------------------------------------|------|----------|
| ATP | 6011 | Actin, gamma 1                                                                                                                                     | gi 1515543242,gi 75812932                                    | 41,775.90 | 100.00% | 14 | 21 | 49 | 0.53% | 49.30% | QEYDES<br>GPSIVHR<br>K                         | 2.69 | 1,644.80 |
| ATP | 6011 | Actin, gamma 1                                                                                                                                     | gi 151554360,gi 74354242,gi 75812932                         | 41,775.90 | 100.00% | 14 | 21 | 49 | 0.53% | 49.30% | SYELPD<br>GOVITIG<br>NER                       | 4.26 | 1,790.89 |
| ATP | 6011 | Actin, gamma 1                                                                                                                                     | gi 151554360,gi 74354242,gi 75812932                         | 41,775.90 | 100.00% | 14 | 21 | 49 | 0.53% | 49.30% | TTGIVM<br>DSGDGV<br>THTVPIY<br>EGYALP<br>HAILR | 5.42 | 3,183.61 |
| ATP | 6011 | Actin, gamma 1                                                                                                                                     | gi 151554360,gi 74354242,gi 75812932                         | 41,775.90 | 100.00% | 14 | 21 | 49 | 0.53% | 49.30% | VAPEEH<br>PVLTE<br>APLNPK                      | 4.61 | 1,954.06 |
| ATP | 6011 | RecName :<br>Full=Peptidyl-tRNA hydrolase 2, mitochondrial;<br>Short=PTH 2;<br>AltName: Full=Bcl-2 inhibitor of transcription;<br>Flags: Precursor | gi 109892883,gi 116292141,gi 60650282,gi 73587109,gi 7735985 | 19,272.70 | 99.90%  | 2  | 2  | 2  | 0.02% | 16.20% | APDEET<br>LVELLT<br>HAK                        | 3.3  | 1,665.87 |
| ATP | 6011 | RecName :<br>Full=Peptidyl-tRNA hydrolase 2, mitochondrial;<br>Short=PTH 2;<br>AltName: Full=Bcl-2 inhibitor of transcription;<br>Flags: Precursor | gi 109892883,gi 116292141,gi 60650282,gi 73587109,gi 7735985 | 19,272.70 | 99.90%  | 2  | 2  | 2  | 0.02% | 16.20% | VLGLTV<br>SLIQDAG<br>R                         | 3.7  | 1,441.84 |
| ATP | 6011 | RCN1 protein                                                                                                                                       | gi 134024617,gi 157073966                                    | 38,734.90 | 99.80%  | 2  | 2  | 2  | 0.02% | 9.67%  | IVDRIDS<br>DGDGFV<br>TTEELK                    | 3.99 | 2,109.04 |
| ATP | 6011 | RCN1 protein                                                                                                                                       | gi 134024617,gi 157073966                                    | 38,734.90 | 99.80%  | 2  | 2  | 2  | 0.02% | 9.67%  | TFDQLT<br>SEESKER                              | 3.93 | 1,569.74 |

|     |      |                   |                                   |           |         |    |    |    |       |        |                                       |      |          |
|-----|------|-------------------|-----------------------------------|-----------|---------|----|----|----|-------|--------|---------------------------------------|------|----------|
| ATP | 6011 | PDIA3<br>protein  | gi 1461869<br>33,gi 14823<br>0374 | 56,913.80 | 100.00% | 17 | 20 | 25 | 0.27% | 36.00% | DLFSEA<br>HSEFLK                      | 3.7  | 1,422.69 |
| ATP | 6011 | PDIA3<br>protein  | gi 1461869<br>33,gi 14823<br>0374 | 56,913.80 | 100.00% | 17 | 20 | 25 | 0.27% | 36.00% | EATNPP<br>VIQEEKP<br>K                | 2.95 | 1,579.83 |
| ATP | 6011 | PDIA3<br>protein  | gi 1461869<br>33,gi 14823<br>0374 | 56,913.80 | 100.00% | 17 | 20 | 25 | 0.27% | 36.00% | ELSDFIS<br>YLK                        | 2.84 | 1,214.63 |
| ATP | 6011 | PDIA3<br>protein  | gi 1461869<br>33,gi 14823<br>0374 | 56,913.80 | 100.00% | 17 | 20 | 25 | 0.27% | 36.00% | FLEDYF<br>DGNLK                       | 3.12 | 1,360.64 |
| ATP | 6011 | PDIA3<br>protein  | gi 1461869<br>33,gi 14823<br>0374 | 56,913.80 | 100.00% | 17 | 20 | 25 | 0.27% | 36.00% | FLEDYF<br>DGNLKR                      | 2.11 | 1,516.74 |
| ATP | 6011 | PDIA3<br>protein  | gi 1461869<br>33,gi 14823<br>0374 | 56,913.80 | 100.00% | 17 | 20 | 25 | 0.27% | 36.00% | FVMQEE<br>FSR                         | 3.17 | 1,188.54 |
| ATP | 6011 | PDIA3<br>protein  | gi 1461869<br>33,gi 14823<br>0374 | 56,913.80 | 100.00% | 17 | 20 | 25 | 0.27% | 36.00% | GFPTIYF<br>SPANKK                     | 3.51 | 1,469.78 |
| ATP | 6011 | PDIA3<br>protein  | gi 1461869<br>33,gi 14823<br>0374 | 56,913.80 | 100.00% | 17 | 20 | 25 | 0.27% | 36.00% | IFRDGEE<br>SGAYDG<br>PR               | 5.09 | 1,668.76 |
| ATP | 6011 | PDIA3<br>protein  | gi 1461869<br>33,gi 14823<br>0374 | 56,913.80 | 100.00% | 17 | 20 | 25 | 0.27% | 36.00% | KLAPEY<br>EAAATR                      | 3.47 | 1,319.70 |
| ATP | 6011 | PDIA3<br>protein  | gi 1461869<br>33,gi 14823<br>0374 | 56,913.80 | 100.00% | 17 | 20 | 25 | 0.27% | 36.00% | KTFSHEL<br>SDFGLES<br>TTGEIPV<br>VAVR | 3.95 | 2,719.39 |
| ATP | 6011 | PDIA3<br>protein  | gi 1461869<br>33,gi 14823<br>0374 | 56,913.80 | 100.00% | 17 | 20 | 25 | 0.27% | 36.00% | LAPEYE<br>AAATR                       | 2.95 | 1,191.60 |
| ATP | 6011 | PDIA3<br>protein  | gi 1461869<br>33,gi 14823<br>0374 | 56,913.80 | 100.00% | 17 | 20 | 25 | 0.27% | 36.00% | LRKDPNI<br>VIAK                       | 3.22 | 1,266.79 |
| ATP | 6011 | PDIA3<br>protein  | gi 1461869<br>33,gi 14823<br>0374 | 56,913.80 | 100.00% | 17 | 20 | 25 | 0.27% | 36.00% | MDATAN<br>DVPSPY<br>EVR               | 4.84 | 1,680.75 |
| ATP | 6011 | PDIA3<br>protein  | gi 1461869<br>33,gi 14823<br>0374 | 56,913.80 | 100.00% | 17 | 20 | 25 | 0.27% | 36.00% | SEPIPES<br>NDGPVK                     | 2.82 | 1,368.66 |
| ATP | 6011 | PDIA3<br>protein  | gi 1461869<br>33,gi 14823<br>0374 | 56,913.80 | 100.00% | 17 | 20 | 25 | 0.27% | 36.00% | TADGIVS<br>HLKK                       | 1.82 | 1,168.67 |
| ATP | 6011 | PDIA3<br>protein  | gi 1461869<br>33,gi 14823<br>0374 | 56,913.80 | 100.00% | 17 | 20 | 25 | 0.27% | 36.00% | TFSHEL<br>DFGLEST<br>TGEIPVV<br>AVR   | 3.82 | 2,591.30 |
| ATP | 6011 | PDIA3<br>protein  | gi 1461869<br>33,gi 14823<br>0374 | 56,913.80 | 100.00% | 17 | 20 | 25 | 0.27% | 36.00% | YGVSGY<br>PTLK                        | 2.73 | 1,084.57 |
| ATP | 6011 | PECAM1<br>protein | gi 1113085<br>31                  | 82,597.50 | 100.00% | 6  | 8  | 25 | 0.27% | 8.94%  | APVHFTI<br>EK                         | 2.51 | 1,041.57 |
| ATP | 6011 | PECAM1<br>protein | gi 1113085<br>31                  | 82,597.50 | 100.00% | 6  | 8  | 25 | 0.27% | 8.94%  | CTVQVT<br>HQAQSF<br>PEIIIQK           | 2.95 | 2,170.13 |
| ATP | 6011 | PECAM1<br>protein | gi 1113085<br>31                  | 82,597.50 | 100.00% | 6  | 8  | 25 | 0.27% | 8.94%  | FHIIPEG<br>K                          | 2.87 | 940.5252 |
| ATP | 6011 | PECAM1<br>protein | gi 1113085<br>31                  | 82,597.50 | 100.00% | 6  | 8  | 25 | 0.27% | 8.94%  | GTETVY<br>SEIR                        | 2.87 | 1,154.57 |
| ATP | 6011 | PECAM1<br>protein | gi 1113085<br>31                  | 82,597.50 | 100.00% | 6  | 8  | 25 | 0.27% | 8.94%  | PAVPLL<br>NSNNEK                      | 2.25 | 1,295.70 |
| ATP | 6011 | PECAM1<br>protein | gi 1113085<br>31                  | 82,597.50 | 100.00% | 6  | 8  | 25 | 0.27% | 8.94%  | QMPVE<br>MSRPAV<br>PLLNSN<br>NEK      | 2.14 | 2,270.13 |



|     |      |                                                                |            |           |         |    |    |     |       |        |                                          |      |          |
|-----|------|----------------------------------------------------------------|------------|-----------|---------|----|----|-----|-------|--------|------------------------------------------|------|----------|
| ATP | 6011 | PREDIC TED: DEAD (Asp-Glu-Ala-Asp) box polypeptide 5 isoform 1 | gi 1199125 | 69,131.70 | 99.80%  | 2  | 2  | 2   | 0.02% | 3.58%  | APILIAT DVASR                            | 3.56 | 1,226.71 |
| ATP | 6011 | PREDIC TED: DEAD (Asp-Glu-Ala-Asp) box polypeptide 5 isoform 1 | gi 1199125 | 69,131.70 | 99.80%  | 2  | 2  | 2   | 0.02% | 3.58%  | QVSDLIS VLR                              | 2.38 | 1,129.66 |
| ATP | 6011 | RecName : Full=40S ribosomal protein S16                       | gi 1088609 | 16,427.90 | 99.90%  | 2  | 2  | 2   | 0.02% | 14.40% | GPLQSV QVFR                              | 3.26 | 1,187.65 |
| ATP | 6011 | RecName : Full=40S ribosomal protein S16                       | gi 1088609 | 16,427.90 | 99.90%  | 2  | 2  | 2   | 0.02% | 14.40% | LLEPVLL LGK                              | 2.26 | 1,094.72 |
| ATP | 6011 | vimentin 70                                                    | gi 1103475 | 53,710.80 | 100.00% | 30 | 46 | 123 | 1.34% | 63.70% | DGQVIN ETSQHH DDLE                       | 3.38 | 1,836.80 |
| ATP | 6011 | vimentin 70                                                    | gi 1103475 | 53,710.80 | 100.00% | 30 | 46 | 123 | 1.34% | 63.70% | DNLAEDI MR                               | 2.58 | 1,092.50 |
| ATP | 6011 | vimentin 70                                                    | gi 1103475 | 53,710.80 | 100.00% | 30 | 46 | 123 | 1.34% | 63.70% | EAAESTL QSFRQD VDNASL AR                 | 4.39 | 2,366.12 |
| ATP | 6011 | vimentin 70                                                    | gi 1103475 | 53,710.80 | 100.00% | 30 | 46 | 123 | 1.34% | 63.70% | EMEENF SVEAAN YQDTIG R                   | 4.2  | 2,218.96 |
| ATP | 6011 | vimentin 70                                                    | gi 1103475 | 53,710.80 | 100.00% | 30 | 46 | 123 | 1.34% | 63.70% | ETNLDS LPLVDT HSK                        | 3.62 | 1,668.84 |
| ATP | 6011 | vimentin 70                                                    | gi 1103475 | 53,710.80 | 100.00% | 30 | 46 | 123 | 1.34% | 63.70% | ETNLDS LPLVDT HSKR                       | 4.41 | 1,824.95 |
| ATP | 6011 | vimentin 70                                                    | gi 1103475 | 53,710.80 | 100.00% | 30 | 46 | 123 | 1.34% | 63.70% | EYQDLL NVK                               | 2.56 | 1,121.58 |
| ATP | 6011 | vimentin 70                                                    | gi 1103475 | 53,710.80 | 100.00% | 30 | 46 | 123 | 1.34% | 63.70% | FADLSE AANR                              | 4.22 | 1,093.53 |
| ATP | 6011 | vimentin 70                                                    | gi 1103475 | 53,710.80 | 100.00% | 30 | 46 | 123 | 1.34% | 63.70% | FANYID KVR                               | 2.2  | 1,125.61 |
| ATP | 6011 | vimentin 70                                                    | gi 1103475 | 53,710.80 | 100.00% | 30 | 46 | 123 | 1.34% | 63.70% | ILLAELE QLK                              | 4.09 | 1,169.71 |
| ATP | 6011 | vimentin 70                                                    | gi 1103475 | 53,710.80 | 100.00% | 30 | 46 | 123 | 1.34% | 63.70% | ILLAELE QKGGQ K                          | 4.44 | 1,539.91 |
| ATP | 6011 | vimentin 70                                                    | gi 1103475 | 53,710.80 | 100.00% | 30 | 46 | 123 | 1.34% | 63.70% | ISLPLPN FSSLNLR                          | 4.55 | 1,570.90 |
| ATP | 6011 | vimentin 70                                                    | gi 1103475 | 53,710.80 | 100.00% | 30 | 46 | 123 | 1.34% | 63.70% | KLHDEEI QELQAQI QEQHVQ IDMDVS KPDLTA ALR | 5.48 | 4,085.06 |

|     |      |                                                     |                  |            |         |    |    |     |       |        |                                                          |      |          |
|-----|------|-----------------------------------------------------|------------------|------------|---------|----|----|-----|-------|--------|----------------------------------------------------------|------|----------|
| ATP | 6011 | vimentin                                            | gi 1103475<br>70 | 53,710.80  | 100.00% | 30 | 46 | 123 | 1.34% | 63.70% | KVESLQ<br>EEIAFLK                                        | 5.67 | 1,533.85 |
| ATP | 6011 | vimentin                                            | gi 1103475<br>70 | 53,710.80  | 100.00% | 30 | 46 | 123 | 1.34% | 63.70% | KVESLQ<br>EEIAFLK<br>K                                   | 5.42 | 1,661.95 |
| ATP | 6011 | vimentin                                            | gi 1103475<br>70 | 53,710.80  | 100.00% | 30 | 46 | 123 | 1.34% | 63.70% | LHDEEIQ<br>ELQAQIQ<br>EQHVQI<br>DMDVSK<br>PDLTAA<br>LR   | 5.55 | 3,956.97 |
| ATP | 6011 | vimentin                                            | gi 1103475<br>70 | 53,710.80  | 100.00% | 30 | 46 | 123 | 1.34% | 63.70% | LLQDSV<br>DFSLAD<br>AINTEFK                              | 4.13 | 2,126.07 |
| ATP | 6011 | vimentin                                            | gi 1103475<br>70 | 53,710.80  | 100.00% | 30 | 46 | 123 | 1.34% | 63.70% | LQDEIQ<br>NMKEE<br>MAR                                   | 3.24 | 1,750.81 |
| ATP | 6011 | vimentin                                            | gi 1103475<br>70 | 53,710.80  | 100.00% | 30 | 46 | 123 | 1.34% | 63.70% | LQEEML<br>QREEAE<br>STLQSF                               | 4.61 | 2,340.11 |
| ATP | 6011 | vimentin                                            | gi 1103475<br>70 | 53,710.80  | 100.00% | 30 | 46 | 123 | 1.34% | 63.70% | LQEEML<br>QREEAE<br>STLQSF<br>QVDNA<br>SLAR              | 3.66 | 3,409.63 |
| ATP | 6011 | vimentin                                            | gi 1103475<br>70 | 53,710.80  | 100.00% | 30 | 46 | 123 | 1.34% | 63.70% | MALDIEI<br>ATYR                                          | 4.45 | 1,311.66 |
| ATP | 6011 | vimentin                                            | gi 1103475<br>70 | 53,710.80  | 100.00% | 30 | 46 | 123 | 1.34% | 63.70% | MALDIEI<br>ATYRK                                         | 2.37 | 1,439.76 |
| ATP | 6011 | vimentin                                            | gi 1103475<br>70 | 53,710.80  | 100.00% | 30 | 46 | 123 | 1.34% | 63.70% | MFGGPG<br>TASRPSS<br>TR                                  | 1.69 | 1,524.72 |
| ATP | 6011 | vimentin                                            | gi 1103475<br>70 | 53,710.80  | 100.00% | 30 | 46 | 123 | 1.34% | 63.70% | SRLGDL<br>YEEEMR                                         | 2.8  | 1,513.70 |
| ATP | 6011 | vimentin                                            | gi 1103475<br>70 | 53,710.80  | 100.00% | 30 | 46 | 123 | 1.34% | 63.70% | TLYTSSP<br>GGVYAT<br>R                                   | 3.93 | 1,472.74 |
| ATP | 6011 | vimentin                                            | gi 1103475<br>70 | 53,710.80  | 100.00% | 30 | 46 | 123 | 1.34% | 63.70% | TNEKVE<br>LQELND<br>R                                    | 4.65 | 1,587.80 |
| ATP | 6011 | vimentin                                            | gi 1103475<br>70 | 53,710.80  | 100.00% | 30 | 46 | 123 | 1.34% | 63.70% | TNEKVE<br>LQELND<br>RFANYI<br>DK                         | 3.5  | 2,439.22 |
| ATP | 6011 | vimentin                                            | gi 1103475<br>70 | 53,710.80  | 100.00% | 30 | 46 | 123 | 1.34% | 63.70% | VELQEL<br>NDR                                            | 3.09 | 1,115.57 |
| ATP | 6011 | vimentin                                            | gi 1103475<br>70 | 53,710.80  | 100.00% | 30 | 46 | 123 | 1.34% | 63.70% | VELQEL<br>NDRFAN<br>YIDK                                 | 2.47 | 1,966.99 |
| ATP | 6011 | vimentin                                            | gi 1103475<br>70 | 53,710.80  | 100.00% | 30 | 46 | 123 | 1.34% | 63.70% | VEVERD<br>NLAEDI<br>MR                                   | 4.03 | 1,688.83 |
| ATP | 6011 | PREDICTED:<br>dedicator<br>of<br>cytokines<br>is 11 | gi 1946807<br>28 | 237,960.50 | 99.80%  | 2  | 2  | 2   | 0.02% | 3.09%  | TQIYSDP<br>LRDLLM<br>FPMEDIS<br>ISVISRQ<br>R             | 2.75 | 3,339.71 |
| ATP | 6011 | PREDICTED:<br>dedicator<br>of<br>cytokines<br>is 11 | gi 1946807<br>28 | 237,960.50 | 99.80%  | 2  | 2  | 2   | 0.02% | 3.09%  | TWLDSM<br>AKIHIKN<br>GDFSEA<br>AMCYV<br>HVAALV<br>AEFLHR | 3.7  | 4,090.01 |

|     |      |                                                                                          |                                                      |           |         |   |   |    |       |        |                                                   |          |
|-----|------|------------------------------------------------------------------------------------------|------------------------------------------------------|-----------|---------|---|---|----|-------|--------|---------------------------------------------------|----------|
| ATP | 6011 | Leucine rich repeat containin g 59                                                       | gi 1096593 25,gi 59857 957,gi 7507 0060,gi 777 36103 | 34,862.40 | 100.00% | 4 | 6 | 11 | 0.12% | 17.30% | DKLDGN 6.28<br>ELDLSLS<br>DLNEVP<br>VK            | 2,313.18 |
| ATP | 6011 | Leucine rich repeat containin g 59                                                       | gi 1096593 25,gi 59857 957,gi 7507 0060,gi 777 36103 | 34,862.40 | 100.00% | 4 | 6 | 11 | 0.12% | 17.30% | DKLDGN 5.22<br>ELDLSLS<br>DLNEVP<br>VKELAA<br>LPK | 3,035.62 |
| ATP | 6011 | Leucine rich repeat containin g 59                                                       | gi 1096593 25,gi 59857 957,gi 7507 0060,gi 777 36103 | 34,862.40 | 100.00% | 4 | 6 | 11 | 0.12% | 17.30% | LVNLQH 3.35<br>LDLLNN<br>R                        | 1,561.88 |
| ATP | 6011 | Leucine rich repeat containin g 59                                                       | gi 1096593 25,gi 59857 957,gi 7507 0060,gi 777 36103 | 34,862.40 | 100.00% | 4 | 6 | 11 | 0.12% | 17.30% | LVTLPVS 3.27<br>FAQLK                             | 1,315.80 |
| ATP | 6011 | RecName : Full=CD GSH iron sulfur domain- containin g protein 1; AltName: Full=Mit oNEET | gi 1108257 57,gi 73587 067,gi 7740 4223              | 11,964.80 | 99.80%  | 2 | 3 | 4  | 0.04% | 26.40% | HNEETG 4.73<br>DNVGPLI<br>IK                      | 1,635.83 |
| ATP | 6011 | RecName : Full=CD GSH iron sulfur domain- containin g protein 1; AltName: Full=Mit oNEET | gi 1108257 57,gi 73587 067,gi 7740 4223              | 11,964.80 | 99.80%  | 2 | 3 | 4  | 0.04% | 26.40% | VVHAFD 3.11<br>MEDLGD<br>K                        | 1,491.68 |
| ATP | 6011 | 17,000 dalton myosin light chain                                                         | gi 578,gi 74 268209                                  | 16,942.80 | 100.00% | 4 | 4 | 4  | 0.04% | 35.10% | ALGQNP 3.17<br>TNAEVL<br>K                        | 1,354.73 |
| ATP | 6011 | 17,000 dalton myosin light chain                                                         | gi 578,gi 74 268209                                  | 16,942.80 | 100.00% | 4 | 4 | 4  | 0.04% | 35.10% | HVLVTL 2.64<br>GEK                                | 995.5885 |
| ATP | 6011 | 17,000 dalton myosin light chain                                                         | gi 578,gi 74 268209                                  | 16,942.80 | 100.00% | 4 | 4 | 4  | 0.04% | 35.10% | NKDQGT 3.55<br>YEDYVE<br>GLR                      | 1,786.82 |
| ATP | 6011 | 17,000 dalton myosin light chain                                                         | gi 578,gi 74 268209                                  | 16,942.80 | 100.00% | 4 | 4 | 4  | 0.04% | 35.10% | VLDFEH 3.09<br>FLPMLQ<br>TVAK                     | 1,904.00 |

|     |      |                                                                                                                                                                                                                                                                                                                 |           |         |   |   |   |       |        |                                         |          |
|-----|------|-----------------------------------------------------------------------------------------------------------------------------------------------------------------------------------------------------------------------------------------------------------------------------------------------------------------|-----------|---------|---|---|---|-------|--------|-----------------------------------------|----------|
| ATP | 6011 | RecName gi 1221440<br>: 79,gi 14623<br>Full=Stre 1780,gi 735<br>ss-70 86960,gi 77<br>protein, 735995<br>mitochon<br>drial;<br>AltName:<br>Full=75<br>kDa<br>glucose-<br>regulated<br>protein;<br>AltName:<br>Full=GR<br>P 75;<br>AltName:<br>Full=Hea<br>t shock<br>70 kDa<br>protein 9;<br>Flags:<br>Precursor | 73,724.40 | 100.00% | 8 | 8 | 9 | 0.10% | 18.00% | DAGQIS 4.12<br>GLNVLR                   | 1,242.68 |
| ATP | 6011 | RecName gi 1221440<br>: 79,gi 14623<br>Full=Stre 1780,gi 735<br>ss-70 86960,gi 77<br>protein, 735995<br>mitochon<br>drial;<br>AltName:<br>Full=75<br>kDa<br>glucose-<br>regulated<br>protein;<br>AltName:<br>Full=GR<br>P 75;<br>AltName:<br>Full=Hea<br>t shock<br>70 kDa<br>protein 9;<br>Flags:<br>Precursor | 73,724.40 | 100.00% | 8 | 8 | 9 | 0.10% | 18.00% | EQQIVIQ 2.75<br>SSGGLS<br>KDDIEN<br>MVK | 2,434.21 |

|     |      |                                                                                                                                                                                                                                                                                                                 |           |         |   |   |   |       |        |                             |          |
|-----|------|-----------------------------------------------------------------------------------------------------------------------------------------------------------------------------------------------------------------------------------------------------------------------------------------------------------------|-----------|---------|---|---|---|-------|--------|-----------------------------|----------|
| ATP | 6011 | RecName gi 1221440 :<br>79,gi 14623<br>Full=Stre 1780,gi 735<br>ss-70 86960,gi 77<br>protein, 735995<br>mitochon<br>drial;<br>AltName:<br>Full=75<br>kDa<br>glucose-<br>regulated<br>protein;<br>AltName:<br>Full=GR<br>P 75;<br>AltName:<br>Full=Hea<br>t shock<br>70 kDa<br>protein 9;<br>Flags:<br>Precursor | 73,724.40 | 100.00% | 8 | 8 | 9 | 0.10% | 18.00% | MKETAE 3.52<br>NYLGHT<br>AK | 1,608.77 |
| ATP | 6011 | RecName gi 1221440 :<br>79,gi 14623<br>Full=Stre 1780,gi 735<br>ss-70 86960,gi 77<br>protein, 735995<br>mitochon<br>drial;<br>AltName:<br>Full=75<br>kDa<br>glucose-<br>regulated<br>protein;<br>AltName:<br>Full=GR<br>P 75;<br>AltName:<br>Full=Hea<br>t shock<br>70 kDa<br>protein 9;<br>Flags:<br>Precursor | 73,724.40 | 100.00% | 8 | 8 | 9 | 0.10% | 18.00% | QAVTNP 3.21<br>NNTFYA<br>TK | 1,568.77 |

|     |      |                                                                                                                                                                                                                                                                                                                 |           |         |   |   |   |       |        |                                      |          |
|-----|------|-----------------------------------------------------------------------------------------------------------------------------------------------------------------------------------------------------------------------------------------------------------------------------------------------------------------|-----------|---------|---|---|---|-------|--------|--------------------------------------|----------|
| ATP | 6011 | RecName gi 1221440<br>: 79,gi 14623<br>Full=Stre 1780,gi 735<br>ss-70 86960,gi 77<br>protein, 735995<br>mitochon<br>drial;<br>AltName:<br>Full=75<br>kDa<br>glucose-<br>regulated<br>protein;<br>AltName:<br>Full=GR<br>P 75;<br>AltName:<br>Full=Hea<br>t shock<br>70 kDa<br>protein 9;<br>Flags:<br>Precursor | 73,724.40 | 100.00% | 8 | 8 | 9 | 0.10% | 18.00% | STNGDT 4.08<br>FLGGED<br>FDQALL<br>R | 2,055.96 |
| ATP | 6011 | RecName gi 1221440<br>: 79,gi 14623<br>Full=Stre 1780,gi 735<br>ss-70 86960,gi 77<br>protein, 735995<br>mitochon<br>drial;<br>AltName:<br>Full=75<br>kDa<br>glucose-<br>regulated<br>protein;<br>AltName:<br>Full=GR<br>P 75;<br>AltName:<br>Full=Hea<br>t shock<br>70 kDa<br>protein 9;<br>Flags:<br>Precursor | 73,724.40 | 100.00% | 8 | 8 | 9 | 0.10% | 18.00% | TTPSVV 3.96<br>AFTADG<br>ER          | 1,450.72 |

|     |      |                                                                                                                                                                                                                                |                      |         |   |   |   |       |        |                               |          |
|-----|------|--------------------------------------------------------------------------------------------------------------------------------------------------------------------------------------------------------------------------------|----------------------|---------|---|---|---|-------|--------|-------------------------------|----------|
| ATP | 6011 | RecName gi 1221440 :<br>Full=Stre ss-70<br>protein, mitochondrial;<br>AltName: Full=75 kDa<br>glucose-regulated protein;<br>AltName: Full=GR P 75;<br>AltName: Full=Heart shock<br>70 kDa<br>protein 9;<br>Flags:<br>Precursor | 73,724.40            | 100.00% | 8 | 8 | 9 | 0.10% | 18.00% | VINEPTA 3.53<br>AALAYG<br>LDK | 1,645.88 |
| ATP | 6011 | RecName gi 1221440 :<br>Full=Stre ss-70<br>protein, mitochondrial;<br>AltName: Full=75 kDa<br>glucose-regulated protein;<br>AltName: Full=GR P 75;<br>AltName: Full=Heart shock<br>70 kDa<br>protein 9;<br>Flags:<br>Precursor | 73,724.40            | 100.00% | 8 | 8 | 9 | 0.10% | 18.00% | VQQTVQ 2.65<br>DLFGR          | 1,290.68 |
| ATP | 6011 | Actin, alpha, cardiac muscle 1                                                                                                                                                                                                 | gi 7358703 42,002.10 | 99.80%  | 2 | 2 | 2 | 0.02% | 23.90% | AVFPSIV 3.04<br>GRPR          | 1,198.71 |
| ATP | 6011 | Actin, alpha, cardiac muscle 1                                                                                                                                                                                                 | gi 7358703 42,002.10 | 99.80%  | 2 | 2 | 2 | 0.02% | 23.90% | DLTDYL 2.34<br>MK             | 1,014.48 |
| ATP | 6011 | Actin, alpha, cardiac muscle 1                                                                                                                                                                                                 | gi 7358703 42,002.10 | 99.80%  | 2 | 2 | 2 | 0.02% | 23.90% | EITALAP 3.13<br>STMK          | 1,177.61 |
| ATP | 6011 | Actin, alpha, cardiac muscle 1                                                                                                                                                                                                 | gi 7358703 42,002.10 | 99.80%  | 2 | 2 | 2 | 0.02% | 23.90% | IKIAPPE 2.45<br>R             | 1,036.65 |

|     |      |                                                           |                                                  |           |         |   |   |   |       |        |                                                |      |          |
|-----|------|-----------------------------------------------------------|--------------------------------------------------|-----------|---------|---|---|---|-------|--------|------------------------------------------------|------|----------|
| ATP | 6011 | Actin,<br>alpha,<br>cardiac<br>muscle 1                   | gi 7358703<br>9,gi 777361<br>17                  | 42,002.10 | 99.80%  | 2 | 2 | 2 | 0.02% | 23.90% | LDLAGR<br>DLTDYL<br>MK                         | 3    | 1,639.84 |
| ATP | 6011 | Actin,<br>alpha,<br>cardiac<br>muscle 1                   | gi 7358703<br>9,gi 777361<br>17                  | 42,002.10 | 99.80%  | 2 | 2 | 2 | 0.02% | 23.90% | QEYDEA<br>GPSIVHR                              | 2.27 | 1,500.71 |
| ATP | 6011 | Actin,<br>alpha,<br>cardiac<br>muscle 1                   | gi 7358703<br>9,gi 777361<br>17                  | 42,002.10 | 99.80%  | 2 | 2 | 2 | 0.02% | 23.90% | SYELPD<br>GQVITIG<br>NER                       | 4.26 | 1,790.89 |
| ATP | 6011 | Actin,<br>alpha,<br>cardiac<br>muscle 1                   | gi 7358703<br>9,gi 777361<br>17                  | 42,002.10 | 99.80%  | 2 | 2 | 2 | 0.02% | 23.90% | YPIEHGII<br>TNWDD<br>MEK                       | 3.6  | 1,976.91 |
| ATP | 6011 | RAB14<br>protein                                          | gi 1584550<br>25,gi 19553<br>9521                | 23,879.60 | 100.00% | 5 | 6 | 8 | 0.09% | 38.60% | GAAGAL<br>MVYDIT<br>R                          | 3.6  | 1,353.68 |
| ATP | 6011 | RAB14<br>protein                                          | gi 1584550<br>25,gi 19553<br>9521                | 23,879.60 | 100.00% | 5 | 6 | 8 | 0.09% | 38.60% | IYQNIQD<br>GSLDLN<br>AAESGV<br>QHKPSA<br>PQGGR | 4.29 | 3,150.56 |
| ATP | 6011 | RAB14<br>protein                                          | gi 1584550<br>25,gi 19553<br>9521                | 23,879.60 | 100.00% | 5 | 6 | 8 | 0.09% | 38.60% | LQIWDT<br>AGQER                                | 2.72 | 1,316.66 |
| ATP | 6011 | RAB14<br>protein                                          | gi 1584550<br>25,gi 19553<br>9521                | 23,879.60 | 100.00% | 5 | 6 | 8 | 0.09% | 38.60% | NLTNPN<br>TVIILIGN<br>K                        | 4.5  | 1,623.94 |
| ATP | 6011 | RAB14<br>protein                                          | gi 1584550<br>25,gi 19553<br>9521                | 23,879.60 | 100.00% | 5 | 6 | 8 | 0.09% | 38.60% | TGENVE<br>DAFLEA<br>AK                         | 3.28 | 1,493.71 |
| ATP | 6011 | RAB2A,<br>member<br>RAS<br>oncogene<br>family             | gi 1099399<br>03,gi 11673<br>4835                | 20,833.10 | 100.00% | 3 | 4 | 6 | 0.07% | 19.00% | EHGLIF<br>METSAC                               | 2.57 | 1,378.67 |
| ATP | 6011 | RAB2A,<br>member<br>RAS<br>oncogene<br>family             | gi 1099399<br>03,gi 11673<br>4835                | 20,833.10 | 100.00% | 3 | 4 | 6 | 0.07% | 19.00% | GAAGAL<br>LVYDITR                              | 3.75 | 1,319.73 |
| ATP | 6011 | RAB2A,<br>member<br>RAS<br>oncogene<br>family             | gi 1099399<br>03,gi 11673<br>4835                | 20,833.10 | 100.00% | 3 | 4 | 6 | 0.07% | 19.00% | YIIIGDT<br>GVGK                                | 2.52 | 1,135.64 |
| ATP | 6011 | RecName<br>:<br>Full=Pho<br>sphoglyc<br>erate<br>kinase 1 | gi 1088608<br>85,gi 74353<br>972,gi 7773<br>5551 | 44,520.20 | 100.00% | 3 | 3 | 3 | 0.03% | 12.50% | ALESPER<br>PFLAILG<br>GAK                      | 3.77 | 1,769.00 |
| ATP | 6011 | RecName<br>:<br>Full=Pho<br>sphoglyc<br>erate<br>kinase 1 | gi 1088608<br>85,gi 74353<br>972,gi 7773<br>5551 | 44,520.20 | 100.00% | 3 | 3 | 3 | 0.03% | 12.50% | VDFNVP<br>MKNNQI<br>TNNQR                      | 4.21 | 2,048.00 |
| ATP | 6011 | RecName<br>:<br>Full=Pho<br>sphoglyc<br>erate<br>kinase 1 | gi 1088608<br>85,gi 74353<br>972,gi 7773<br>5551 | 44,520.20 | 100.00% | 3 | 3 | 3 | 0.03% | 12.50% | VLNNME<br>IGTSLFD<br>EEGSK                     | 3.38 | 1,998.93 |



|     |      |                                                                                                                             |                                                                                                                                                                                            |           |         |   |   |    |       |        |                                                |      |          |
|-----|------|-----------------------------------------------------------------------------------------------------------------------------|--------------------------------------------------------------------------------------------------------------------------------------------------------------------------------------------|-----------|---------|---|---|----|-------|--------|------------------------------------------------|------|----------|
| ATP | 6011 | RAB5A, member<br>RAS oncogene<br>family                                                                                     | gi 1139118<br>76,gi 11549<br>5947,gi 122<br>144200                                                                                                                                         | 23,670.90 | 99.90%  | 2 | 3 | 4  | 0.04% | 17.20% | GVDLTE<br>PTQPTR                               | 3.11 | 1,313.67 |
| ATP | 6011 | RAB5A, member<br>RAS oncogene<br>family                                                                                     | gi 1139118<br>76,gi 11549<br>5947,gi 122<br>144200                                                                                                                                         | 23,670.90 | 99.90%  | 2 | 3 | 4  | 0.04% | 17.20% | LVLLGE<br>SAVGK                                | 3.36 | 1,085.66 |
| ATP | 6011 | RAB5A, member<br>RAS oncogene<br>family                                                                                     | gi 1139118<br>76,gi 11549<br>5947,gi 122<br>144200                                                                                                                                         | 23,670.90 | 99.90%  | 2 | 3 | 4  | 0.04% | 17.20% | TSMNVN<br>EIFMAIA<br>K                         | 4.13 | 1,584.78 |
| ATP | 6011 | Chain R, Cadmium<br>Ion Binding<br>Structure Of<br>Bovine Heart<br>Cytochrome C<br>Oxidase In The<br>Fully Reduced<br>State | gi 1492415<br>23,gi 14924<br>1540,gi 149<br>241553,gi 1<br>49241570,g<br>i 14924158<br>3,gi 149241<br>600,gi 1492<br>41613,gi 42<br>564216,gi 5<br>0872151,gi <br>60391934,g<br>i 81674705 | 16,717.40 | 100.00% | 5 | 6 | 18 | 0.20% | 36.80% | EIYPYVI<br>QELRPTL<br>NELGIST<br>PEELGL<br>DKV | 4.98 | 3,428.82 |
| ATP | 6011 | Chain R, Cadmium<br>Ion Binding<br>Structure Of<br>Bovine Heart<br>Cytochrome C<br>Oxidase In The<br>Fully Reduced<br>State | gi 1492415<br>23,gi 14924<br>1540,gi 149<br>241553,gi 1<br>49241570,g<br>i 14924158<br>3,gi 149241<br>600,gi 1492<br>41613,gi 42<br>564216,gi 5<br>0872151,gi <br>60391934,g<br>i 81674705 | 16,717.40 | 100.00% | 5 | 6 | 18 | 0.20% | 36.80% | GMNTLV<br>GYDLVP<br>EPK                        | 4.35 | 1,648.83 |
| ATP | 6011 | Chain R, Cadmium<br>Ion Binding<br>Structure Of<br>Bovine Heart<br>Cytochrome C<br>Oxidase In The<br>Fully Reduced<br>State | gi 1492415<br>23,gi 14924<br>1540,gi 149<br>241553,gi 1<br>49241570,g<br>i 14924158<br>3,gi 149241<br>600,gi 1492<br>41613,gi 42<br>564216,gi 5<br>0872151,gi <br>60391934,g<br>i 81674705 | 16,717.40 | 100.00% | 5 | 6 | 18 | 0.20% | 36.80% | KGMNTL<br>VGYDLV<br>PEPK                       | 3.79 | 1,776.92 |

|     |      |                                                                                                                                                                                                                                                                                                          |           |         |   |   |    |       |        |                            |          |
|-----|------|----------------------------------------------------------------------------------------------------------------------------------------------------------------------------------------------------------------------------------------------------------------------------------------------------------|-----------|---------|---|---|----|-------|--------|----------------------------|----------|
| ATP | 6011 | Chain R, gi 1492415<br>Cadmium 23,gi 14924<br>Ion 1540,gi 149<br>Binding 241553,gi 1<br>Structure 49241570,g<br>Of i 14924158<br>Bovine 3,gi 149241<br>Heart 600,gi 1492<br>Cytochro 41613,gi 42<br>me C 564216,gi 5<br>Oxidase 0872151,gi <br>In The 60391934,g<br>Fully i 81674705<br>Reduced<br>State | 16,717.40 | 100.00% | 5 | 6 | 18 | 0.20% | 36.80% | LNDFAV 3.19<br>AVR         | 992.5159 |
| ATP | 6011 | Chain R, gi 1492415<br>Cadmium 23,gi 14924<br>Ion 1540,gi 149<br>Binding 241553,gi 1<br>Structure 49241570,g<br>Of i 14924158<br>Bovine 3,gi 149241<br>Heart 600,gi 1492<br>Cytochro 41613,gi 42<br>me C 564216,gi 5<br>Oxidase 0872151,gi <br>In The 60391934,g<br>Fully i 81674705<br>Reduced<br>State | 16,717.40 | 100.00% | 5 | 6 | 18 | 0.20% | 36.80% | RLNDFA 3.65<br>SAVR        | 1,148.62 |
| ATP | 6011 | YME1L1 gi 1515571<br>protein 21,gi 15612<br>0349                                                                                                                                                                                                                                                         | 80,044.00 | 100.00% | 3 | 3 | 3  | 0.03% | 5.72%  | IKFDQSV 3.12<br>DPEIAR     | 1,630.88 |
| ATP | 6011 | YME1L1 gi 1515571<br>protein 21,gi 15612<br>0349                                                                                                                                                                                                                                                         | 80,044.00 | 100.00% | 3 | 3 | 3  | 0.03% | 5.72%  | LAETQH 2.75<br>TAPSFV<br>K | 1,428.75 |
| ATP | 6011 | YME1L1 gi 1515571<br>protein 21,gi 15612<br>0349                                                                                                                                                                                                                                                         | 80,044.00 | 100.00% | 3 | 3 | 3  | 0.03% | 5.72%  | LSPETQS 3.41<br>AIEQEIR    | 1,600.82 |
| ATP | 6011 | RecName gi 1221404<br>: 20,gi 74353<br>Full=Vesi 894,gi 7773<br>cle- 5533<br>associate<br>d<br>membran<br>e protein<br>8;<br>Short=V<br>AMP-8                                                                                                                                                            | 11,339.40 | 99.80%  | 2 | 3 | 4  | 0.04% | 24.00% | NKTEDL 4.8<br>EATSEHF<br>K | 1,648.78 |
| ATP | 6011 | RecName gi 1221404<br>: 20,gi 74353<br>Full=Vesi 894,gi 7773<br>cle- 5533<br>associate<br>d<br>membran<br>e protein<br>8;<br>Short=V<br>AMP-8                                                                                                                                                            | 11,339.40 | 99.80%  | 2 | 3 | 4  | 0.04% | 24.00% | NLRDEV 3.3<br>EGVK         | 1,158.61 |

|     |      |                                                                                                                                                                                                                                                                                                                                                                                |           |         |   |   |   |       |        |                                            |          |
|-----|------|--------------------------------------------------------------------------------------------------------------------------------------------------------------------------------------------------------------------------------------------------------------------------------------------------------------------------------------------------------------------------------|-----------|---------|---|---|---|-------|--------|--------------------------------------------|----------|
| ATP | 6011 | RecName gi 1185973 :<br>73,gi 26418<br>Full=Ann 2,gi 615530<br>exin A1; 85,gi 73587<br>AltName: 269,gi 7385<br>Full=Ann 3762,gi 74<br>exin-1;<br>AltName:<br>Full=Ann<br>exin I;<br>AltName:<br>Full=Lip<br>ocortin I;<br>AltName:<br>Full=Cal<br>pactin II;<br>AltName:<br>Full=Chr<br>omobindi<br>n-9;<br>AltName:<br>Full=p35;<br>AltName:<br>Full=Pho<br>spholipas<br>e A2 | 38,881.20 | 99.90%  | 2 | 2 | 2 | 0.02% | 10.10% | GDRSEE 5.5<br>LAVNDD<br>LADSDA<br>R        | 2,047.92 |
| ATP | 6011 | RecName gi 1185973 :<br>73,gi 26418<br>Full=Ann 2,gi 615530<br>exin A1; 85,gi 73587<br>AltName: 269,gi 7385<br>Full=Ann 3762,gi 74<br>exin-1;<br>AltName:<br>Full=Ann<br>exin I;<br>AltName:<br>Full=Lip<br>ocortin I;<br>AltName:<br>Full=Cal<br>pactin II;<br>AltName:<br>Full=Chr<br>omobindi<br>n-9;<br>AltName:<br>Full=p35;<br>AltName:<br>Full=Pho<br>spholipas<br>e A2 | 38,881.20 | 99.90%  | 2 | 2 | 2 | 0.02% | 10.10% | GLGTDE 3.55<br>DTLNEIL<br>ASR              | 1,703.84 |
| ATP | 6011 | LRRRC8C protein gi 1487452 :<br>86,gi 14964<br>2813                                                                                                                                                                                                                                                                                                                            | 92,305.20 | 100.00% | 5 | 5 | 5 | 0.05% | 10.80% | IPQAVV 1.62<br>DVSSHL<br>QK                | 1,520.84 |
| ATP | 6011 | LRRRC8C protein gi 1487452 :<br>86,gi 14964<br>2813                                                                                                                                                                                                                                                                                                                            | 92,305.20 | 100.00% | 5 | 5 | 5 | 0.05% | 10.80% | LELPLIM 3.24<br>LSGLPDT<br>VFEITEL<br>QSLK | 2,815.54 |
| ATP | 6011 | LRRRC8C protein gi 1487452 :<br>86,gi 14964<br>2813                                                                                                                                                                                                                                                                                                                            | 92,305.20 | 100.00% | 5 | 5 | 5 | 0.05% | 10.80% | NLEELY 4.03<br>LVGSL<br>HDIR               | 1,945.00 |
| ATP | 6011 | LRRRC8C protein gi 1487452 :<br>86,gi 14964<br>2813                                                                                                                                                                                                                                                                                                                            | 92,305.20 | 100.00% | 5 | 5 | 5 | 0.05% | 10.80% | SIEEIVSF 2.88<br>QHLR                      | 1,457.77 |
| ATP | 6011 | LRRRC8C protein gi 1487452 :<br>86,gi 14964<br>2813                                                                                                                                                                                                                                                                                                                            | 92,305.20 | 100.00% | 5 | 5 | 5 | 0.05% | 10.80% | SNTTQS 4.27<br>GPEGSL<br>VNSQSL<br>K       | 1,933.95 |

|     |      |                                                                                                                                                        |                                      |           |        |   |   |   |       |       |                          |      |          |
|-----|------|--------------------------------------------------------------------------------------------------------------------------------------------------------|--------------------------------------|-----------|--------|---|---|---|-------|-------|--------------------------|------|----------|
| ATP | 6011 | MGAT1 protein                                                                                                                                          | gi 154426138,gi 59858237,gi 62751783 | 51,684.70 | 99.80% | 2 | 2 | 2 | 0.02% | 6.04% | LPSDSAL<br>DDDPAS<br>LTR | 4.32 | 1,672.80 |
| ATP | 6011 | MGAT1 protein                                                                                                                                          | gi 154426138,gi 59858237,gi 62751783 | 51,684.70 | 99.80% | 2 | 2 | 2 | 0.02% | 6.04% | VYGAPL<br>LQVEK          | 2.24 | 1,216.69 |
| ATP | 6011 | PREDICTED: similar to Thioredoxin domain-containing protein 5 precursor (Thioredoxin-like protein p46) (Endoplasmic reticulum protein ERp46) isoform 1 | gi 119915902                         | 45,792.10 | 99.80% | 2 | 2 | 4 | 0.04% | 4.55% | FFKPGQ<br>EAVK           | 2.51 | 1,150.63 |
| ATP | 6011 | PREDICTED: similar to Thioredoxin domain-containing protein 5 precursor (Thioredoxin-like protein p46) (Endoplasmic reticulum protein ERp46) isoform 1 | gi 119915902                         | 45,792.10 | 99.80% | 2 | 2 | 4 | 0.04% | 4.55% | GYPTLL<br>LFR            | 2.4  | 1,079.62 |

|     |      |                                                                                                                                                                                                                                                                                     |           |         |   |   |    |       |        |                       |          |
|-----|------|-------------------------------------------------------------------------------------------------------------------------------------------------------------------------------------------------------------------------------------------------------------------------------------|-----------|---------|---|---|----|-------|--------|-----------------------|----------|
| ATP | 6011 | RecName gi 1221371 :<br>13.gi 83638<br>Full=Tra 548.gi 8437<br>nslocon- 0035<br>associate<br>d protein<br>subunit<br>delta;<br>Short=T<br>RAP-<br>delta;<br>AltName:<br>Full=Sig<br>nal<br>sequence<br>receptor<br>subunit<br>delta;<br>Short=SS<br>R-delta;<br>Flags:<br>Precursor | 18,796.20 | 100.00% | 4 | 6 | 18 | 0.20% | 25.60% | FFDEESY 3.51<br>SLLR  | 1,405.66 |
| ATP | 6011 | RecName gi 1221371 :<br>13.gi 83638<br>Full=Tra 548.gi 8437<br>nslocon- 0035<br>associate<br>d protein<br>subunit<br>delta;<br>Short=T<br>RAP-<br>delta;<br>AltName:<br>Full=Sig<br>nal<br>sequence<br>receptor<br>subunit<br>delta;<br>Short=SS<br>R-delta;<br>Flags:<br>Precursor | 18,796.20 | 100.00% | 4 | 6 | 18 | 0.20% | 25.60% | FFDEESY 2.45<br>SLLRK | 1,533.76 |

|     |      |                                                                                                                                                                                                                                             |                                                  |           |         |   |   |    |       |        |                                      |      |          |
|-----|------|---------------------------------------------------------------------------------------------------------------------------------------------------------------------------------------------------------------------------------------------|--------------------------------------------------|-----------|---------|---|---|----|-------|--------|--------------------------------------|------|----------|
| ATP | 6011 | RecName<br>:<br>Full=Tra<br>nslocon-<br>associate<br>d protein<br>subunit<br>delta;<br>Short=T<br>RAP-<br>delta;<br>AltName:<br>Full=Sig<br>nal<br>sequence<br>receptor<br>subunit<br>delta;<br>Short=SS<br>R-delta;<br>Flags:<br>Precursor | gi 1221371<br>13,gi 83638<br>548,gi 8437<br>0035 | 18,796.20 | 100.00% | 4 | 6 | 18 | 0.20% | 25.60% | NNEDVS<br>VIPPLFT<br>VSVDRH          | 5.49 | 2,138.09 |
| ATP | 6011 | RecName<br>:<br>Full=Tra<br>nslocon-<br>associate<br>d protein<br>subunit<br>delta;<br>Short=T<br>RAP-<br>delta;<br>AltName:<br>Full=Sig<br>nal<br>sequence<br>receptor<br>subunit<br>delta;<br>Short=SS<br>R-delta;<br>Flags:<br>Precursor | gi 1221371<br>13,gi 83638<br>548,gi 8437<br>0035 | 18,796.20 | 100.00% | 4 | 6 | 18 | 0.20% | 25.60% | VQNMAL<br>YADVSG<br>K                | 4.73 | 1,411.69 |
| ATP | 6011 | Translocase of<br>outer<br>mitochondrial<br>membrane 70<br>homolog A (S.<br>cerevisiae)                                                                                                                                                     | gi 1153050<br>42,gi 11549<br>6634                | 67,553.40 | 100.00% | 6 | 7 | 7  | 0.08% | 18.60% | ASPAPGS<br>GHPDGP<br>GTHLEM<br>NSLDR | 2.58 | 2,416.10 |

|     |      |                                                                          |                                      |           |         |   |   |   |       |        |                                                 |      |          |
|-----|------|--------------------------------------------------------------------------|--------------------------------------|-----------|---------|---|---|---|-------|--------|-------------------------------------------------|------|----------|
| ATP | 6011 | Translocase of outer mitochondrial membrane 70 homolog A (S. cerevisiae) | gi 115305042,gi 115496634            | 67,553.40 | 100.00% | 6 | 7 | 7 | 0.08% | 18.60% | LDNKKE<br>CLEDVT<br>AVCILEG<br>FQNQQS<br>MLLADK | 3.58 | 3,511.71 |
| ATP | 6011 | Translocase of outer mitochondrial membrane 70 homolog A (S. cerevisiae) | gi 115305042,gi 115496634            | 67,553.40 | 100.00% | 6 | 7 | 7 | 0.08% | 18.60% | LRPESAL<br>AQAQK                                | 3.39 | 1,311.74 |
| ATP | 6011 | Translocase of outer mitochondrial membrane 70 homolog A (S. cerevisiae) | gi 115305042,gi 115496634            | 67,553.40 | 100.00% | 6 | 7 | 7 | 0.08% | 18.60% | NVDLST<br>FYQNR                                 | 4.02 | 1,356.65 |
| ATP | 6011 | Translocase of outer mitochondrial membrane 70 homolog A (S. cerevisiae) | gi 115305042,gi 115496634            | 67,553.40 | 100.00% | 6 | 7 | 7 | 0.08% | 18.60% | SDEDKD<br>KEGEAL<br>EVK                         | 2.8  | 1,691.80 |
| ATP | 6011 | Translocase of outer mitochondrial membrane 70 homolog A (S. cerevisiae) | gi 115305042,gi 115496634            | 67,553.40 | 100.00% | 6 | 7 | 7 | 0.08% | 18.60% | SYFSSFT<br>DDIISQP<br>MLKGEK                    | 2.65 | 2,309.10 |
| ATP | 6011 | lysosomal-associated membrane protein 2 isoform 1                        | gi 164420738,gi 74353978,gi 77736087 | 44,524.90 | 100.00% | 3 | 3 | 6 | 0.07% | 5.16%  | IPLNDIF<br>R                                    | 3.21 | 987.5623 |

|     |      |                                                                                                                                                                                                          |                                                                                                                  |           |         |   |   |   |       |        |                                |          |
|-----|------|----------------------------------------------------------------------------------------------------------------------------------------------------------------------------------------------------------|------------------------------------------------------------------------------------------------------------------|-----------|---------|---|---|---|-------|--------|--------------------------------|----------|
| ATP | 6011 | lysosomal<br>l-<br>associate<br>d<br>membran<br>e protein<br>2 isoform<br>1                                                                                                                              | gi 1644207<br>38,gi 74353<br>978,gi 7773<br>6087                                                                 | 44,524.90 | 100.00% | 3 | 3 | 6 | 0.07% | 5.16%  | VALKIPL 3.6<br>NDIFR           | 1,398.85 |
| ATP | 6011 | lysosomal<br>l-<br>associate<br>d<br>membran<br>e protein<br>2 isoform<br>1                                                                                                                              | gi 1644207<br>38,gi 74353<br>978,gi 7773<br>6087                                                                 | 44,524.90 | 100.00% | 3 | 3 | 6 | 0.07% | 5.16%  | YLDFVF 2.39<br>AVK             | 1,101.60 |
| ATP | 6011 | Nicastrin                                                                                                                                                                                                | gi 7426760<br>0,gi 777359<br>01                                                                                  | 79,055.00 | 99.80%  | 2 | 2 | 2 | 0.02% | 2.65%  | ALAGVA 3.25<br>TVLAR           | 1,041.64 |
| ATP | 6011 | Nicastrin                                                                                                                                                                                                | gi 7426760<br>0,gi 777359<br>01                                                                                  | 79,055.00 | 99.80%  | 2 | 2 | 2 | 0.02% | 2.65%  | LLYGFL 2.6<br>VR               | 980.5928 |
| ATP | 6011 | RecName<br>:<br>Full=AT<br>P<br>synthase<br>subunit<br>O,<br>mitochon<br>drial;<br>AltName:<br>Full=Olig<br>omycin<br>sensitivit<br>y<br>conferral<br>protein;<br>Short=O<br>SCP;<br>Flags:<br>Precursor | gi 1438113<br>65,gi 15788<br>1386,gi 159<br>164706,gi 1<br>63451,gi 27<br>806307,gi 2<br>8189911,gi <br>74268299 | 23,332.20 | 100.00% | 3 | 4 | 5 | 0.05% | 19.70% | FSPLTSN 2.77<br>LINLLAE<br>NGR | 1,859.00 |
| ATP | 6011 | RecName<br>:<br>Full=AT<br>P<br>synthase<br>subunit<br>O,<br>mitochon<br>drial;<br>AltName:<br>Full=Olig<br>omycin<br>sensitivit<br>y<br>conferral<br>protein;<br>Short=O<br>SCP;<br>Flags:<br>Precursor | gi 1438113<br>65,gi 15788<br>1386,gi 159<br>164706,gi 1<br>63451,gi 27<br>806307,gi 2<br>8189911,gi <br>74268299 | 23,332.20 | 100.00% | 3 | 4 | 5 | 0.05% | 19.70% | LVRPPV 3.26<br>QIYGIEG<br>R    | 1,596.92 |



|     |      |                                                                                                                                                                                                          |                                                                                                                  |            |         |    |    |    |       |        |                                                    |          |
|-----|------|----------------------------------------------------------------------------------------------------------------------------------------------------------------------------------------------------------|------------------------------------------------------------------------------------------------------------------|------------|---------|----|----|----|-------|--------|----------------------------------------------------|----------|
| ATP | 6011 | RecName<br>:<br>Full=AT<br>P<br>synthase<br>subunit<br>O,<br>mitochon<br>drial;<br>AltName:<br>Full=Olig<br>omycin<br>sensitivit<br>y<br>conferral<br>protein;<br>Short=O<br>SCP;<br>Flags:<br>Precursor | gi 1438113<br>65,gi 15788<br>1386,gi 159<br>164706,gi 1<br>63451,gi 27<br>806307,gi 2<br>8189911,gi <br>74268299 | 23,332.20  | 100.00% | 3  | 4  | 5  | 0.05% | 19.70% | YATALY 2.5<br>SAASK                                | 1,145.58 |
| ATP | 6011 | PGRMC<br>2 protein                                                                                                                                                                                       | gi 1487449<br>19,gi 14964<br>2895                                                                                | 23,693.20  | 100.00% | 4  | 5  | 6  | 0.07% | 18.80% | DFSLEQL 2.94<br>R                                  | 1,007.52 |
| ATP | 6011 | PGRMC<br>2 protein                                                                                                                                                                                       | gi 1487449<br>19,gi 14964<br>2895                                                                                | 23,693.20  | 100.00% | 4  | 5  | 6  | 0.07% | 18.80% | FYGPAG 3.57<br>PYGIFAG<br>R                        | 1,472.73 |
| ATP | 6011 | PGRMC<br>2 protein                                                                                                                                                                                       | gi 1487449<br>19,gi 14964<br>2895                                                                                | 23,693.20  | 100.00% | 4  | 5  | 6  | 0.07% | 18.80% | GLGAGA 5.57<br>GAGEES<br>PAASLPR                   | 1,667.83 |
| ATP | 6011 | PGRMC<br>2 protein                                                                                                                                                                                       | gi 1487449<br>19,gi 14964<br>2895                                                                                | 23,693.20  | 100.00% | 4  | 5  | 6  | 0.07% | 18.80% | RGLGAG 3.75<br>AGAGEE<br>SPAASLP<br>R              | 1,823.94 |
| ATP | 6011 | PREDIC<br>TED:<br>similar to<br>myoferlin<br>isoform<br>12                                                                                                                                               | gi 1946789<br>41                                                                                                 | 234,648.00 | 100.00% | 20 | 24 | 30 | 0.33% | 15.80% | AEDIPQ 2.31<br>MDDAFS<br>QTVK                      | 1,810.82 |
| ATP | 6011 | PREDIC<br>TED:<br>similar to<br>myoferlin<br>isoform<br>12                                                                                                                                               | gi 1946789<br>41                                                                                                 | 234,648.00 | 100.00% | 20 | 24 | 30 | 0.33% | 15.80% | ALSQIHE 4.18<br>AAVR                               | 1,194.66 |
| ATP | 6011 | PREDIC<br>TED:<br>similar to<br>myoferlin<br>isoform<br>12                                                                                                                                               | gi 1946789<br>41                                                                                                 | 234,648.00 | 100.00% | 20 | 24 | 30 | 0.33% | 15.80% | EELYMP 3.08<br>PLVIK                               | 1,347.72 |
| ATP | 6011 | PREDIC<br>TED:<br>similar to<br>myoferlin<br>isoform<br>12                                                                                                                                               | gi 1946789<br>41                                                                                                 | 234,648.00 | 100.00% | 20 | 24 | 30 | 0.33% | 15.80% | FGKPDPI 4.06<br>VSVIFKD<br>EK                      | 1,819.00 |
| ATP | 6011 | PREDIC<br>TED:<br>similar to<br>myoferlin<br>isoform<br>12                                                                                                                                               | gi 1946789<br>41                                                                                                 | 234,648.00 | 100.00% | 20 | 24 | 30 | 0.33% | 15.80% | GNNPFF 3.41<br>DELFFY<br>NVHLTP<br>SELMDEI<br>ISIR | 3,473.67 |

|     |      |                                                   |            |            |         |    |    |    |       |        |                                     |      |          |
|-----|------|---------------------------------------------------|------------|------------|---------|----|----|----|-------|--------|-------------------------------------|------|----------|
| ATP | 6011 | PREDIC TED: 41<br>similar to myoferlin isoform 12 | gi 1946789 | 234,648.00 | 100.00% | 20 | 24 | 30 | 0.33% | 15.80% | IDVGFV<br>YDEPGH<br>AVMR            | 2.64 | 1,820.86 |
| ATP | 6011 | PREDIC TED: 41<br>similar to myoferlin isoform 12 | gi 1946789 | 234,648.00 | 100.00% | 20 | 24 | 30 | 0.33% | 15.80% | ILVELST<br>LLEK                     | 3.7  | 1,257.77 |
| ATP | 6011 | PREDIC TED: 41<br>similar to myoferlin isoform 12 | gi 1946789 | 234,648.00 | 100.00% | 20 | 24 | 30 | 0.33% | 15.80% | IYRAEDI<br>PQMDDA<br>FSQTVK         | 4.18 | 2,243.07 |
| ATP | 6011 | PREDIC TED: 41<br>similar to myoferlin isoform 12 | gi 1946789 | 234,648.00 | 100.00% | 20 | 24 | 30 | 0.33% | 15.80% | LQSNIEA<br>LK                       | 3.02 | 1,015.58 |
| ATP | 6011 | PREDIC TED: 41<br>similar to myoferlin isoform 12 | gi 1946789 | 234,648.00 | 100.00% | 20 | 24 | 30 | 0.33% | 15.80% | NLMALD<br>KDSFSD<br>PYAHVS<br>FLHR  | 3.57 | 2,579.23 |
| ATP | 6011 | PREDIC TED: 41<br>similar to myoferlin isoform 12 | gi 1946789 | 234,648.00 | 100.00% | 20 | 24 | 30 | 0.33% | 15.80% | NLVDPF<br>VEVSFA<br>GK              | 3.3  | 1,521.79 |
| ATP | 6011 | PREDIC TED: 41<br>similar to myoferlin isoform 12 | gi 1946789 | 234,648.00 | 100.00% | 20 | 24 | 30 | 0.33% | 15.80% | SLLTEA<br>DAGHTE<br>FTDEVY<br>QNESR | 4.79 | 2,612.17 |
| ATP | 6011 | PREDIC TED: 41<br>similar to myoferlin isoform 12 | gi 1946789 | 234,648.00 | 100.00% | 20 | 24 | 30 | 0.33% | 15.80% | TLHSSFQ<br>PNISQGR                  | 3.76 | 1,571.79 |
| ATP | 6011 | PREDIC TED: 41<br>similar to myoferlin isoform 12 | gi 1946789 | 234,648.00 | 100.00% | 20 | 24 | 30 | 0.33% | 15.80% | TQGLVP<br>EHVETR                    | 2.65 | 1,365.71 |
| ATP | 6011 | PREDIC TED: 41<br>similar to myoferlin isoform 12 | gi 1946789 | 234,648.00 | 100.00% | 20 | 24 | 30 | 0.33% | 15.80% | VENTLE<br>VLNEKE<br>ADERPA<br>GK    | 3.66 | 2,274.13 |
| ATP | 6011 | PREDIC TED: 41<br>similar to myoferlin isoform 12 | gi 1946789 | 234,648.00 | 100.00% | 20 | 24 | 30 | 0.33% | 15.80% | VGETIID<br>LENR                     | 3.04 | 1,258.66 |

|     |      |                                                                                                                             |                                                  |            |         |    |    |    |       |        |                                                                 |      |          |
|-----|------|-----------------------------------------------------------------------------------------------------------------------------|--------------------------------------------------|------------|---------|----|----|----|-------|--------|-----------------------------------------------------------------|------|----------|
| ATP | 6011 | PREDIC TED: 41<br>similar to myoferlin isoform 12                                                                           | gi 1946789                                       | 234,648.00 | 100.00% | 20 | 24 | 30 | 0.33% | 15.80% | VIEDRD<br>NYIPNTL<br>NPVFGR                                     | 3.98 | 2,232.14 |
| ATP | 6011 | PREDIC TED: 41<br>similar to myoferlin isoform 12                                                                           | gi 1946789                                       | 234,648.00 | 100.00% | 20 | 24 | 30 | 0.33% | 15.80% | VIIEFLD<br>NDQVGK<br>DEFLGR                                     | 3.12 | 2,207.13 |
| ATP | 6011 | PREDIC TED: 41<br>similar to myoferlin isoform 12                                                                           | gi 1946789                                       | 234,648.00 | 100.00% | 20 | 24 | 30 | 0.33% | 15.80% | VIVESAS<br>NIPK                                                 | 3.55 | 1,156.66 |
| ATP | 6011 | PREDIC TED: 41<br>similar to myoferlin isoform 12                                                                           | gi 1946789                                       | 234,648.00 | 100.00% | 20 | 24 | 30 | 0.33% | 15.80% | VSMFVL<br>GTGDEP<br>PPEKQD<br>RDNDSD<br>DVESNL<br>LLPAGIA<br>LR | 2.62 | 4,226.06 |
| ATP | 6011 | TXNDC1 3 protein<br>gi 1488784<br>48,gi 14964<br>2897                                                                       | gi 1488784                                       | 38,865.40  | 99.80%  | 2  | 2  | 2  | 0.02% | 7.18%  | FFVTTLTLP<br>AFFHAK                                             | 3.03 | 1,525.82 |
| ATP | 6011 | TXNDC1 3 protein<br>gi 1488784<br>48,gi 14964<br>2897                                                                       | gi 1488784                                       | 38,865.40  | 99.80%  | 2  | 2  | 2  | 0.02% | 7.18%  | VDVIQEP<br>GLSGR                                                | 2.75 | 1,269.68 |
| ATP | 6011 | OClA domain<br>gi 5985850<br>9,gi 627518<br>containin<br>g 1<br>43,gi 75040<br>205                                          | gi 5985850                                       | 27,811.90  | 100.00% | 2  | 2  | 2  | 0.02% | 18.60% | ADFREP<br>NAEVPR<br>PIPHIGA<br>DYIPTEE<br>ER                    | 4    | 3,218.59 |
| ATP | 6011 | OClA domain<br>gi 5985850<br>9,gi 627518<br>containin<br>g 1<br>43,gi 75040<br>205                                          | gi 5985850                                       | 27,811.90  | 100.00% | 2  | 2  | 2  | 0.02% | 18.60% | SVPLAA<br>TSMELITQ<br>GLISK                                     | 3.83 | 1,846.04 |
| ATP | 6011 | Na-K-Cl cotransporter<br>gi 2264408,<br>gi 2780751<br>1                                                                     | gi 2264408,<br>gi 2780751<br>1                   | 130,380.80 | 100.00% | 2  | 2  | 2  | 0.02% | 4.58%  | KPDVNW<br>GSSTQA<br>LTYLNA<br>LQHSIRL<br>SGVEDH<br>VK           | 2.63 | 3,663.89 |
| ATP | 6011 | Na-K-Cl cotransporter<br>gi 2264408,<br>gi 2780751<br>1                                                                     | gi 2264408,<br>gi 2780751<br>1                   | 130,380.80 | 100.00% | 2  | 2  | 2  | 0.02% | 4.58%  | LQEGLDI<br>SHLQGQ<br>EELLSSQ<br>EK                              | 4.21 | 2,481.25 |
| ATP | 6011 | RecName : Full=Heterogeneous nuclear ribonucleoprotein K; Short=hnRNP K<br>gi 1088607<br>77,gi 74354<br>615,gi 7773<br>6071 | gi 1088607<br>77,gi 74354<br>615,gi 7773<br>6071 | 51,003.40  | 100.00% | 4  | 4  | 5  | 0.05% | 14.00% | IDEPLEG<br>SEDRIITI<br>TGTQDQ<br>IQNAQY<br>LLQNSV<br>K          | 3.77 | 3,829.95 |

|     |      |                                                                                                           |                                                                 |           |         |   |   |   |       |        |                                                         |      |          |
|-----|------|-----------------------------------------------------------------------------------------------------------|-----------------------------------------------------------------|-----------|---------|---|---|---|-------|--------|---------------------------------------------------------|------|----------|
| ATP | 6011 | RecName<br>:<br>Full=Het<br>erogeneo<br>us<br>nuclear<br>ribonucle<br>oprotein<br>K;<br>Short=hn<br>RNP K | gi 1088607<br>77,gi 74354<br>615,gi 7773<br>6071                | 51,003.40 | 100.00% | 4 | 4 | 5 | 0.05% | 14.00% | ITITGTQ<br>DQIQNA<br>QYLLQN<br>SVK                      | 6.48 | 2,589.39 |
| ATP | 6011 | RecName<br>:<br>Full=Het<br>erogeneo<br>us<br>nuclear<br>ribonucle<br>oprotein<br>K;<br>Short=hn<br>RNP K | gi 1088607<br>77,gi 74354<br>615,gi 7773<br>6071                | 51,003.40 | 100.00% | 4 | 4 | 5 | 0.05% | 14.00% | RPAEDM<br>EEEQAF<br>KR                                  | 3.7  | 1,751.80 |
| ATP | 6011 | RecName<br>:<br>Full=Het<br>erogeneo<br>us<br>nuclear<br>ribonucle<br>oprotein<br>K;<br>Short=hn<br>RNP K | gi 1088607<br>77,gi 74354<br>615,gi 7773<br>6071                | 51,003.40 | 100.00% | 4 | 4 | 5 | 0.05% | 14.00% | TDYNAS<br>VSVPDS<br>SGPER                               | 3.67 | 1,780.80 |
| ATP | 6011 | myristoyl<br>ated<br>alanine-<br>rich<br>protein<br>kinase C<br>substrate                                 | gi 1154954<br>97,gi 14887<br>2484,gi 163<br>340,gi 9453<br>4743 | 31,960.80 | 99.80%  | 2 | 3 | 4 | 0.04% | 6.87%  | GEATAE<br>RPGAAA<br>VASSPS<br>K                         | 4.93 | 1,814.89 |
| ATP | 6011 | myristoyl<br>ated<br>alanine-<br>rich<br>protein<br>kinase C<br>substrate                                 | gi 1154954<br>97,gi 14887<br>2484,gi 163<br>340,gi 9453<br>4743 | 31,960.80 | 99.80%  | 2 | 3 | 4 | 0.04% | 6.87%  | TAAKGE<br>ATAERP<br>GAAAVA<br>SSPSK                     | 2.53 | 2,186.10 |
| ATP | 6011 | RecName<br>:<br>Full=Dna<br>J<br>homolog<br>subfamily<br>C<br>member<br>11                                | gi 1108081<br>98,gi 11405<br>0887,gi 847<br>08894               | 63,220.40 | 99.80%  | 2 | 2 | 2 | 0.02% | 9.48%  | GTISVGI<br>DATDLF<br>DRYEEE<br>YEDVSG<br>SGFPQIEI<br>NK | 3.35 | 3,893.82 |
| ATP | 6011 | RecName<br>:<br>Full=Dna<br>J<br>homolog<br>subfamily<br>C<br>member<br>11                                | gi 1108081<br>98,gi 11405<br>0887,gi 847<br>08894               | 63,220.40 | 99.80%  | 2 | 2 | 2 | 0.02% | 9.48%  | LFNLVH<br>QAYEVL<br>SDPQTR                              | 3.38 | 2,130.10 |

|     |      |                                                      |                                                 |           |         |   |    |    |       |        |                              |      |          |
|-----|------|------------------------------------------------------|-------------------------------------------------|-----------|---------|---|----|----|-------|--------|------------------------------|------|----------|
| ATP | 6011 | vascular<br>endotheli<br>al<br>cadherin<br>precursor | gi 3430529<br>9,gi 486753<br>81,gi 75071<br>940 | 87,450.60 | 100.00% | 8 | 10 | 12 | 0.13% | 14.20% | FKMLAE<br>LYGSDP<br>QEELVY   | 3.04 | 2,148.02 |
| ATP | 6011 | vascular<br>endotheli<br>al<br>cadherin<br>precursor | gi 3430529<br>9,gi 486753<br>81,gi 75071<br>940 | 87,450.60 | 100.00% | 8 | 10 | 12 | 0.13% | 14.20% | KPLIGSV<br>LAKDPD<br>AAQR    | 2.86 | 1,779.01 |
| ATP | 6011 | vascular<br>endotheli<br>al<br>cadherin<br>precursor | gi 3430529<br>9,gi 486753<br>81,gi 75071<br>940 | 87,450.60 | 100.00% | 8 | 10 | 12 | 0.13% | 14.20% | NLESPSS<br>FTIK              | 2.41 | 1,222.63 |
| ATP | 6011 | vascular<br>endotheli<br>al<br>cadherin<br>precursor | gi 3430529<br>9,gi 486753<br>81,gi 75071<br>940 | 87,450.60 | 100.00% | 8 | 10 | 12 | 0.13% | 14.20% | PSLYAQ<br>VQKPPR             | 2.17 | 1,383.77 |
| ATP | 6011 | vascular<br>endotheli<br>al<br>cadherin<br>precursor | gi 3430529<br>9,gi 486753<br>81,gi 75071<br>940 | 87,450.60 | 100.00% | 8 | 10 | 12 | 0.13% | 14.20% | TSDKGQ<br>FFGITK             | 3.47 | 1,328.68 |
| ATP | 6011 | vascular<br>endotheli<br>al<br>cadherin<br>precursor | gi 3430529<br>9,gi 486753<br>81,gi 75071<br>940 | 87,450.60 | 100.00% | 8 | 10 | 12 | 0.13% | 14.20% | VDKNTG<br>DVYALE<br>R        | 4.25 | 1,479.74 |
| ATP | 6011 | vascular<br>endotheli<br>al<br>cadherin<br>precursor | gi 3430529<br>9,gi 486753<br>81,gi 75071<br>940 | 87,450.60 | 100.00% | 8 | 10 | 12 | 0.13% | 14.20% | VGSPPLG<br>SLFVEDP<br>DEPQNR | 4.69 | 2,056.00 |
| ATP | 6011 | vascular<br>endotheli<br>al<br>cadherin<br>precursor | gi 3430529<br>9,gi 486753<br>81,gi 75071<br>940 | 87,450.60 | 100.00% | 8 | 10 | 12 | 0.13% | 14.20% | YSFVQG<br>EYR                | 2.94 | 1,148.54 |

|     |      |                                                                                                                                                                                                                                                                                                                               |           |         |   |   |   |       |        |                                 |          |
|-----|------|-------------------------------------------------------------------------------------------------------------------------------------------------------------------------------------------------------------------------------------------------------------------------------------------------------------------------------|-----------|---------|---|---|---|-------|--------|---------------------------------|----------|
| ATP | 6011 | RecName gi 1099400<br>: 77.gi 74354<br>Full=Alp 056.gi 8719<br>ha- 6501<br>enolase;<br>AltName:<br>Full=2-<br>phospho-<br>D-<br>glycerate<br>hydro-<br>lyase;<br>AltName:<br>Full=Non-<br>neural<br>enolase;<br>Short=N<br>NE;<br>AltName:<br>Full=Eno-<br>lase 1;<br>AltName:<br>Full=Pho-<br>sphopyru-<br>vate<br>hydratase | 47,309.10 | 100.00% | 3 | 3 | 3 | 0.03% | 10.80% | AAVPSG 2.54<br>ASTGIYE<br>ALELR | 1,804.94 |
| ATP | 6011 | RecName gi 1099400<br>: 77.gi 74354<br>Full=Alp 056.gi 8719<br>ha- 6501<br>enolase;<br>AltName:<br>Full=2-<br>phospho-<br>D-<br>glycerate<br>hydro-<br>lyase;<br>AltName:<br>Full=Non-<br>neural<br>enolase;<br>Short=N<br>NE;<br>AltName:<br>Full=Eno-<br>lase 1;<br>AltName:<br>Full=Pho-<br>sphopyru-<br>vate<br>hydratase | 47,309.10 | 100.00% | 3 | 3 | 3 | 0.03% | 10.80% | DATNVG 4.4<br>DEGGFA<br>PNILENK | 1,960.92 |

|     |      |                                                                                                                                                                                                    |                                           |           |         |   |   |   |       |        |                                                   |          |
|-----|------|----------------------------------------------------------------------------------------------------------------------------------------------------------------------------------------------------|-------------------------------------------|-----------|---------|---|---|---|-------|--------|---------------------------------------------------|----------|
| ATP | 6011 | RecName : Full=Alp ha- enolase; AltName: Full=2-phospho-D-glycerate hydro-lyase; AltName: Full=Non-neural enolase; Short=N NE; AltName: Full=Eno lase 1; AltName: Full=Pho sphopyru vate hydratase | gi 1099400 : 77,gi 74354 056,gi 8719 6501 | 47,309.10 | 100.00% | 3 | 3 | 3 | 0.03% | 10.80% | IGAEVY 2.71<br>HNLK                               | 1,143.62 |
| ATP | 6011 | LOC515309 protein                                                                                                                                                                                  | gi 1488784 60,gi 14977 3584               | 31,548.40 | 99.80%  | 2 | 3 | 3 | 0.03% | 11.00% | KEEEEEEE 4.58<br>EEYDEG<br>SNLKR                  | 2,241.96 |
| ATP | 6011 | LOC515309 protein                                                                                                                                                                                  | gi 1488784 60,gi 14977 3584               | 31,548.40 | 99.80%  | 2 | 3 | 3 | 0.03% | 11.00% | SNPEDQI 4.05<br>LYQTER                            | 1,592.76 |
| ATP | 6011 | PREDIC TED: lamin B2                                                                                                                                                                               | gi 1946688 43                             | 70,532.10 | 100.00% | 4 | 4 | 5 | 0.05% | 12.10% | ETENGE 3.23<br>EGEDEA<br>AEFGEE<br>DLFHQQ<br>GDPR | 3,164.28 |
| ATP | 6011 | PREDIC TED: lamin B2                                                                                                                                                                               | gi 1946688 43                             | 70,532.10 | 100.00% | 4 | 4 | 5 | 0.05% | 12.10% | LALDME 2.67<br>ISAYRK                             | 1,425.74 |
| ATP | 6011 | PREDIC TED: lamin B2                                                                                                                                                                               | gi 1946688 43                             | 70,532.10 | 100.00% | 4 | 4 | 5 | 0.05% | 12.10% | QVLEGE 2.22<br>EISYK                              | 1,294.65 |
| ATP | 6011 | PREDIC TED: lamin B2                                                                                                                                                                               | gi 1946688 43                             | 70,532.10 | 100.00% | 4 | 4 | 5 | 0.05% | 12.10% | TLYEAE 3.43<br>LADAR                              | 1,251.62 |
| ATP | 6011 | PREDIC TED: lamin B2                                                                                                                                                                               | gi 1946688 43                             | 70,532.10 | 100.00% | 4 | 4 | 5 | 0.05% | 12.10% | TTLVNA 4.05<br>DGEEVA<br>MR                       | 1,521.72 |
| ATP | 6011 | SCO cytochro me oxidase deficient homolog 1 (yeast)                                                                                                                                                | gi 1192239 14,gi 12269 2513,gi 134 035032 | 33,641.50 | 99.80%  | 2 | 3 | 4 | 0.04% | 12.10% | LIGLTGT 4.51<br>KEEIDQ<br>VAR                     | 1,742.97 |
| ATP | 6011 | SCO cytochro me oxidase deficient homolog 1 (yeast)                                                                                                                                                | gi 1192239 14,gi 12269 2513,gi 134 035032 | 33,641.50 | 99.80%  | 2 | 3 | 4 | 0.04% | 12.10% | SIGKPLL 3.55<br>GGPFSLT<br>THTGEP<br>K            | 2,137.17 |
| ATP | 6011 | PREDIC TED: thrombo modulin                                                                                                                                                                        | gi 1199054 21                             | 60,710.90 | 99.80%  | 2 | 2 | 3 | 0.03% | 4.84%  | GPATFL 2.55<br>AASR                               | 990.5367 |

|     |      |                                                                                |                                                  |           |         |   |   |    |       |        |                                                                    |      |          |
|-----|------|--------------------------------------------------------------------------------|--------------------------------------------------|-----------|---------|---|---|----|-------|--------|--------------------------------------------------------------------|------|----------|
| ATP | 6011 | PREDICTED:<br>thrombomodulin transporter 2, ATP-binding cassette, sub-family B | gi 119905421                                     | 60,710.90 | 99.80%  | 2 | 2 | 3  | 0.03% | 4.84%  | SSVAED<br>VISLLLS<br>GDGPR                                         | 3.71 | 1,814.95 |
| ATP | 6011 | transporter 2, ATP-binding cassette, sub-family B                              | gi 114051053,gi 19171652,gi 27806345,gi 63169160 | 79,287.60 | 100.00% | 4 | 5 | 5  | 0.05% | 12.70% | KPDLPPP<br>GTLAPP<br>TLQGR                                         | 2.72 | 1,855.04 |
| ATP | 6011 | transporter 2, ATP-binding cassette, sub-family B                              | gi 114051053,gi 19171652,gi 27806345,gi 63169160 | 79,287.60 | 100.00% | 4 | 5 | 5  | 0.05% | 12.70% | LQTVQS<br>ADQVLV<br>LR                                             | 3.47 | 1,569.90 |
| ATP | 6011 | transporter 2, ATP-binding cassette, sub-family B                              | gi 114051053,gi 19171652,gi 27806345,gi 63169160 | 79,287.60 | 100.00% | 4 | 5 | 5  | 0.05% | 12.70% | QVVLVG<br>QEPVLF<br>GSVR                                           | 4.7  | 1,814.02 |
| ATP | 6011 | transporter 2, ATP-binding cassette, sub-family B                              | gi 114051053,gi 19171652,gi 27806345,gi 63169160 | 79,287.60 | 100.00% | 4 | 5 | 5  | 0.05% | 12.70% | VNFQNV<br>SFAYPSR<br>PDQPAL<br>QGLTFT<br>LSPGQM<br>TALVGP<br>NGSGK | 2.57 | 4,408.20 |
| ATP | 6011 | RecName: Full=Malate dehydrogenase, mitochondrial; Flags: Precursor            | gi 118572778,gi 81674781                         | 35,651.00 | 100.00% | 7 | 9 | 10 | 0.11% | 27.80% | AGAGSA<br>TLMAY<br>AGAR                                            | 4.3  | 1,470.70 |
| ATP | 6011 | RecName: Full=Malate dehydrogenase, mitochondrial; Flags: Precursor            | gi 118572778,gi 81674781                         | 35,651.00 | 100.00% | 7 | 9 | 10 | 0.11% | 27.80% | ANAFVA<br>ELK                                                      | 2.56 | 962.5305 |
| ATP | 6011 | RecName: Full=Malate dehydrogenase, mitochondrial; Flags: Precursor            | gi 118572778,gi 81674781                         | 35,651.00 | 100.00% | 7 | 9 | 10 | 0.11% | 27.80% | ANAFVA<br>ELKDLL<br>PAR                                            | 3.54 | 1,629.86 |



|     |      |                                                                                                                                         |           |         |   |   |    |       |        |                                         |          |
|-----|------|-----------------------------------------------------------------------------------------------------------------------------------------|-----------|---------|---|---|----|-------|--------|-----------------------------------------|----------|
| ATP | 6011 | RecName gi 1185727 :<br>78,gi 81674<br>Full=Mal 781<br>ate<br>dehydrog<br>enase,<br>mitochon<br>drial;<br>Flags:<br>Precursor           | 35,651.00 | 100.00% | 7 | 9 | 10 | 0.11% | 27.80% | LTLYDIA 6.25<br>HTPGVA<br>ADLSHIE<br>TR | 2,393.25 |
| ATP | 6011 | RecName gi 1185727 :<br>78,gi 81674<br>Full=Mal 781<br>ate<br>dehydrog<br>enase,<br>mitochon<br>drial;<br>Flags:<br>Precursor           | 35,651.00 | 100.00% | 7 | 9 | 10 | 0.11% | 27.80% | MIAEAIP 2.97<br>ELK                     | 1,130.61 |
| ATP | 6011 | RecName gi 1185727 :<br>78,gi 81674<br>Full=Mal 781<br>ate<br>dehydrog<br>enase,<br>mitochon<br>drial;<br>Flags:<br>Precursor           | 35,651.00 | 100.00% | 7 | 9 | 10 | 0.11% | 27.80% | VAVLGA 4.23<br>SGGIGQP<br>LSLLLK        | 1,793.09 |
| ATP | 6011 | RecName gi 1185727 :<br>78,gi 81674<br>Full=Mal 781<br>ate<br>dehydrog<br>enase,<br>mitochon<br>drial;<br>Flags:<br>Precursor           | 35,651.00 | 100.00% | 7 | 9 | 10 | 0.11% | 27.80% | VNVPVI 3.6<br>GGHAGK                    | 1,147.66 |
| ATP | 6011 | Chain A, gi 1105910<br>Subcomp 26,gi 11059<br>lex Of 1029,gi 602<br>The 033<br>Stator Of<br>Bovine<br>Mitochon<br>drial Atp<br>Synthase | 24,651.00 | 100.00% | 5 | 6 | 18 | 0.20% | 26.20% | FGLIPEE 2.9<br>FFQFLYP<br>K             | 1,874.97 |
| ATP | 6011 | Chain A, gi 1105910<br>Subcomp 26,gi 11059<br>lex Of 1029,gi 602<br>The 033<br>Stator Of<br>Bovine<br>Mitochon<br>drial Atp<br>Synthase | 24,651.00 | 100.00% | 5 | 6 | 18 | 0.20% | 26.20% | HYLFDV 2.72<br>QR                       | 1,077.55 |

|     |      |                                                                                            |                                                                                                  |           |         |   |    |    |       |        |                                  |      |          |
|-----|------|--------------------------------------------------------------------------------------------|--------------------------------------------------------------------------------------------------|-----------|---------|---|----|----|-------|--------|----------------------------------|------|----------|
| ATP | 6011 | Chain A, Subcomp<br>lex Of The<br>Stator Of<br>Bovine<br>Mitochon<br>drial Atp<br>Synthase | gi 1105910<br>26,gi 11059<br>1029,gi 602<br>033                                                  | 24,651.00 | 100.00% | 5 | 6  | 18 | 0.20% | 26.20% | NNIAMA<br>LEVTYR                 | 3.88 | 1,410.70 |
| ATP | 6011 | Chain A, Subcomp<br>lex Of The<br>Stator Of<br>Bovine<br>Mitochon<br>drial Atp<br>Synthase | gi 1105910<br>26,gi 11059<br>1029,gi 602<br>033                                                  | 24,651.00 | 100.00% | 5 | 6  | 18 | 0.20% | 26.20% | PVPPLPE<br>HGGK                  | 2.06 | 1,127.62 |
| ATP | 6011 | Chain A, Subcomp<br>lex Of The<br>Stator Of<br>Bovine<br>Mitochon<br>drial Atp<br>Synthase | gi 1105910<br>26,gi 11059<br>1029,gi 602<br>033                                                  | 24,651.00 | 100.00% | 5 | 6  | 18 | 0.20% | 26.20% | QIQDAID<br>MEK                   | 2.65 | 1,206.57 |
| ATP | 6011 | Ribosomal protein<br>S8                                                                    | gi 1192241<br>10,gi 58760<br>384,gi 5985<br>8489,gi 707<br>78956,gi 74<br>268417,gi 7<br>5070020 | 24,188.40 | 99.80%  | 2 | 2  | 2  | 0.02% | 13.50% | IIDVVYN<br>ASNNEL<br>VR          | 5.24 | 1,718.91 |
| ATP | 6011 | Ribosomal protein<br>S8                                                                    | gi 1192241<br>10,gi 58760<br>384,gi 5985<br>8489,gi 707<br>78956,gi 74<br>268417,gi 7<br>5070020 | 24,188.40 | 99.80%  | 2 | 2  | 2  | 0.02% | 13.50% | ISSLLEE<br>QFQQGK                | 3.83 | 1,506.78 |
| ATP | 6011 | PREDICTED:<br>similar to<br>oxysterol<br>7alpha-<br>hydroxylase                            | gi 1946727<br>64                                                                                 | 90,479.20 | 100.00% | 3 | 3  | 3  | 0.03% | 6.82%  | AMAVLR<br>DEIDHLL<br>QSTGQK      | 3.86 | 2,141.10 |
| ATP | 6011 | PREDICTED:<br>similar to<br>oxysterol<br>7alpha-<br>hydroxylase                            | gi 1946727<br>64                                                                                 | 90,479.20 | 100.00% | 3 | 3  | 3  | 0.03% | 6.82%  | FLFGIPY<br>PDSVDL<br>FR          | 2.74 | 1,785.92 |
| ATP | 6011 | PREDICTED:<br>similar to<br>oxysterol<br>7alpha-<br>hydroxylase                            | gi 1946727<br>64                                                                                 | 90,479.20 | 100.00% | 3 | 3  | 3  | 0.03% | 6.82%  | MLTDS<br>LIDEIHS<br>TYQFLQ<br>GK | 3.18 | 2,470.18 |
| ATP | 6011 | TUBA1B protein                                                                             | gi 1488780<br>19,gi 16880<br>4008                                                                | 50,133.70 | 100.00% | 8 | 10 | 14 | 0.15% | 26.40% | AVFVDL<br>EPTVIDE<br>VR          | 4.59 | 1,701.91 |

|     |      |                                                                                                                                                                          |                                     |           |         |   |    |    |       |        |                                           |      |          |
|-----|------|--------------------------------------------------------------------------------------------------------------------------------------------------------------------------|-------------------------------------|-----------|---------|---|----|----|-------|--------|-------------------------------------------|------|----------|
| ATP | 6011 | TUBA1B protein                                                                                                                                                           | gi 148878019,gi 168804008           | 50,133.70 | 100.00% | 8 | 10 | 14 | 0.15% | 26.40% | DVNAAI<br>ATIK                            | 2.92 | 1,015.58 |
| ATP | 6011 | TUBA1B protein                                                                                                                                                           | gi 148878019,gi 168804008           | 50,133.70 | 100.00% | 8 | 10 | 14 | 0.15% | 26.40% | EIIDLVL<br>DR                             | 2.5  | 1,085.62 |
| ATP | 6011 | TUBA1B protein                                                                                                                                                           | gi 148878019,gi 168804008           | 50,133.70 | 100.00% | 8 | 10 | 14 | 0.15% | 26.40% | IHFPLAT<br>YAPVISA<br>EK                  | 2.52 | 1,756.96 |
| ATP | 6011 | TUBA1B protein                                                                                                                                                           | gi 148878019,gi 168804008           | 50,133.70 | 100.00% | 8 | 10 | 14 | 0.15% | 26.40% | LISQIVSS<br>ITASLR                        | 3.34 | 1,487.88 |
| ATP | 6011 | TUBA1B protein                                                                                                                                                           | gi 148878019,gi 168804008           | 50,133.70 | 100.00% | 8 | 10 | 14 | 0.15% | 26.40% | NLDIERP<br>TYTNLN<br>R                    | 3.34 | 1,718.88 |
| ATP | 6011 | TUBA1B protein                                                                                                                                                           | gi 148878019,gi 168804008           | 50,133.70 | 100.00% | 8 | 10 | 14 | 0.15% | 26.40% | QLFHPE<br>QLITGKE<br>DAANNY<br>AR         | 3.35 | 2,415.21 |
| ATP | 6011 | TUBA1B protein                                                                                                                                                           | gi 148878019,gi 168804008           | 50,133.70 | 100.00% | 8 | 10 | 14 | 0.15% | 26.40% | TIGGGD<br>DSFNTEF<br>SETGAG<br>K          | 3.87 | 2,007.89 |
| ATP | 6011 | PREDICTED: similar to transmembrane protein 165                                                                                                                          | gi 76619924                         | 34,667.10 | 99.80%  | 2 | 2  | 2  | 0.02% | 13.30% | MSPDEG<br>QEELEE<br>VQAELK                | 4.12 | 2,076.93 |
| ATP | 6011 | PREDICTED: similar to transmembrane protein 165                                                                                                                          | gi 76619924                         | 34,667.10 | 99.80%  | 2 | 2  | 2  | 0.02% | 13.30% | NKEPPA<br>PAQQLQ<br>PQPAAV<br>QGPEPA<br>R | 5.09 | 2,619.36 |
| ATP | 6011 | RecName: Full=NA DH dehydrogenase [ubiquinone] 1 alpha subcomplex subunit 8; AltName: Full=NA DH-ubiquinone oxidoreductase 19 kDa subunit; AltName: Full=Complex I-19kD; | gi 117187028461275,gi 5996818682766 | 20,073.10 | 99.80%  | 2 | 2  | 2  | 0.02% | 18.60% | ARPEPN<br>PEVEGD<br>LKPAP                 | 5.98 | 1,874.97 |

|     |      |                                                                                                                                                                                                                                                                                                              |            |            |         |    |    |    |       |        |                              |          |
|-----|------|--------------------------------------------------------------------------------------------------------------------------------------------------------------------------------------------------------------------------------------------------------------------------------------------------------------|------------|------------|---------|----|----|----|-------|--------|------------------------------|----------|
| ATP | 6011 | RecName gi 1171870, 20,073.10<br>:<br>Full=NA 5,gi 599681<br>DH .gi 8682766<br>dehydrog 4<br>enase<br>[ubiquino<br>ne] 1<br>alpha<br>subcompl<br>ex<br>subunit<br>8;<br>AltName:<br>Full=NA<br>DH-<br>ubiquino<br>ne<br>oxidored<br>uctase 19<br>kDa<br>subunit;<br>AltName:<br>Full=Co<br>mplex I-<br>19kD; | gi 2846127 | 20,073.10  | 99.80%  | 2  | 2  | 2  | 0.02% | 18.60% | VKTDRP 2.25<br>LPENPY<br>HSR | 1,808.94 |
| ATP | 6011 | RecName gi 266647<br>:<br>Full=Nitr<br>ic oxide<br>synthase,<br>endotheli<br>al;<br>AltName:<br>Full=End<br>othelial<br>NOS;<br>Short=eN<br>OS;<br>AltName:<br>Full=EC-<br>NOS;<br>AltName:<br>Full=NO<br>S type III;<br>Short=N<br>OSIII;<br>AltName:<br>Full=Con<br>stitutive<br>NOS;<br>Short=cN          | gi 266647  | 133,270.00 | 100.00% | 13 | 17 | 20 | 0.22% | 14.80% | AAAQDI 2.89<br>FSPK          | 1,047.55 |















|     |      |                                                                                     |            |           |         |   |   |   |       |        |                                      |      |          |
|-----|------|-------------------------------------------------------------------------------------|------------|-----------|---------|---|---|---|-------|--------|--------------------------------------|------|----------|
| ATP | 6011 | PREDIC TED: similar to eukaryotic translation elongation factor 1 alpha 1 isoform 1 | gi 1199383 | 50,141.20 | 100.00% | 4 | 5 | 7 | 0.08% | 11.00% | VETGVL<br>KPGMVV<br>TFAPVN<br>VTTEVK | 4.58 | 2,531.38 |
| ATP | 6011 | PREDIC TED: similar to eukaryotic translation elongation factor 1 alpha 1 isoform 1 | gi 1199383 | 50,141.20 | 100.00% | 4 | 5 | 7 | 0.08% | 11.00% | YYVTIID<br>APGHR                     | 3.54 | 1,404.73 |
| ATP | 6011 | PREDIC TED: similar to eukaryotic translation elongation factor 1 alpha 1 isoform 1 | gi 1199383 | 50,141.20 | 100.00% | 4 | 5 | 7 | 0.08% | 11.00% | YYVTIID<br>APGHRD<br>FIK             | 2.57 | 1,908.00 |
| ATP | 6011 | cell division cycle 42 (GTP binding protein, 25kDa)                                 | gi 1140524 | 21,240.70 | 99.80%  | 2 | 2 | 4 | 0.04% | 19.90% | NVFDEAI<br>LAALEPP<br>EPK            | 3.47 | 1,852.97 |
| ATP | 6011 | cell division cycle 42 (GTP binding protein, 25kDa)                                 | gi 1140524 | 21,240.70 | 99.80%  | 2 | 2 | 4 | 0.04% | 19.90% | TPFLLVG<br>TQIDLRD<br>DPSTIEK        | 2.91 | 2,358.26 |
| ATP | 6011 | RecName: Full=Golgi SNAP receptor complex member 1                                  | gi 1089359 | 28,524.90 | 99.80%  | 2 | 2 | 3 | 0.03% | 13.20% | ENMTSQ<br>RGMLKS<br>IQSK             | 3.24 | 1,837.93 |
| ATP | 6011 | RecName: Full=Golgi SNAP receptor complex member 1                                  | gi 1089359 | 28,524.90 | 99.80%  | 2 | 2 | 3 | 0.03% | 13.20% | MNTLAN<br>RFPVAVN<br>SLIQR           | 4.01 | 1,961.04 |
| ATP | 6011 | transcription factor EF1(A)                                                         | gi 162983  | 35,905.70 | 100.00% | 5 | 7 | 8 | 0.09% | 31.50% | EDGNEE<br>DKENQG<br>DETQGG<br>QPPQR  | 3.67 | 2,628.10 |

|     |      |                                                      |                                                                                   |           |         |   |   |   |       |        |                                                     |          |
|-----|------|------------------------------------------------------|-----------------------------------------------------------------------------------|-----------|---------|---|---|---|-------|--------|-----------------------------------------------------|----------|
| ATP | 6011 | transcript<br>ion factor<br>EF1(A)                   | gi 162983,<br>i 27807361,<br>gi 5404003<br>0,gi 868212<br>83                      | 35,905.70 | 100.00% | 5 | 7 | 8 | 0.09% | 31.50% | EDGNEE 2<br>DKENQG<br>DETQGG<br>QPPQRR              | 2,784.21 |
| ATP | 6011 | transcript<br>ion factor<br>EF1(A)                   | gi 162983,<br>i 27807361,<br>gi 5404003<br>0,gi 868212<br>83                      | 35,905.70 | 100.00% | 5 | 7 | 8 | 0.09% | 31.50% | GAEAAAN 4.35<br>VTGPGG<br>VPVQGS<br>K               | 1,695.87 |
| ATP | 6011 | transcript<br>ion factor<br>EF1(A)                   | gi 162983,<br>i 27807361,<br>gi 5404003<br>0,gi 868212<br>83                      | 35,905.70 | 100.00% | 5 | 7 | 8 | 0.09% | 31.50% | NYQQNY 5.52<br>QNSESG<br>EKNEGS<br>ESAPEG<br>QAQQR  | 3,257.40 |
| ATP | 6011 | transcript<br>ion factor<br>EF1(A)                   | gi 162983,<br>i 27807361,<br>gi 5404003<br>0,gi 868212<br>83                      | 35,905.70 | 100.00% | 5 | 7 | 8 | 0.09% | 31.50% | RPQYSN 3.52<br>PPVQGE<br>VMEGAD<br>NQGAGE<br>QGRPVR | 3,239.53 |
| ATP | 6011 | H3<br>histone,<br>family<br>3A                       | gi 5985828<br>9,gi 621771<br>68,gi 95769<br>331                                   | 15,310.70 | 99.80%  | 2 | 3 | 7 | 0.08% | 14.70% | EIAQDFK 3.24<br>TDLR                                | 1,335.69 |
| ATP | 6011 | H3<br>histone,<br>family<br>3A                       | gi 5985828<br>9,gi 621771<br>68,gi 95769<br>331                                   | 15,310.70 | 99.80%  | 2 | 3 | 7 | 0.08% | 14.70% | YRPGTV 2.24<br>ALR                                  | 1,032.59 |
| ATP | 6011 | dihydroor<br>otate<br>dehydrog<br>enase<br>precursor | gi 1106656<br>38,gi 11236<br>2407,gi 598<br>57979,gi 62<br>751827,gi 7<br>5057853 | 42,758.80 | 100.00% | 4 | 4 | 5 | 0.05% | 13.70% | FTSLGGLL 2.82<br>PR                                 | 1,003.59 |
| ATP | 6011 | dihydroor<br>otate<br>dehydrog<br>enase<br>precursor | gi 1106656<br>38,gi 11236<br>2407,gi 598<br>57979,gi 62<br>751827,gi 7<br>5057853 | 42,758.80 | 100.00% | 4 | 4 | 5 | 0.05% | 13.70% | LTEDGL 4.56<br>PLGINLG<br>K                         | 1,439.81 |
| ATP | 6011 | dihydroor<br>otate<br>dehydrog<br>enase<br>precursor | gi 1106656<br>38,gi 11236<br>2407,gi 598<br>57979,gi 62<br>751827,gi 7<br>5057853 | 42,758.80 | 100.00% | 4 | 4 | 5 | 0.05% | 13.70% | VFRLPE 4.16<br>DQAIINR                              | 1,570.87 |
| ATP | 6011 | dihydroor<br>otate<br>dehydrog<br>enase<br>precursor | gi 1106656<br>38,gi 11236<br>2407,gi 598<br>57979,gi 62<br>751827,gi 7<br>5057853 | 42,758.80 | 100.00% | 4 | 4 | 5 | 0.05% | 13.70% | VPIVGV 5.18<br>GGVSSG<br>QDALEK                     | 1,711.92 |
| ATP | 6011 | TM9SF4<br>protein                                    | gi 1461867<br>97,gi 16606<br>3945,gi 172<br>047290                                | 74,351.10 | 100.00% | 4 | 4 | 4 | 0.04% | 10.30% | AENLGE 2.5<br>VLRGDR                                | 1,328.69 |
| ATP | 6011 | TM9SF4<br>protein                                    | gi 1461867<br>97,gi 16606<br>3945,gi 172<br>047290                                | 74,351.10 | 100.00% | 4 | 4 | 4 | 0.04% | 10.30% | ISEDYYV 4.36<br>HLIADNL<br>PVATR                    | 2,189.12 |
| ATP | 6011 | TM9SF4<br>protein                                    | gi 1461867<br>97,gi 16606<br>3945,gi 172<br>047290                                | 74,351.10 | 100.00% | 4 | 4 | 4 | 0.04% | 10.30% | IVNTPFQ 3.84<br>VLMNSE<br>K                         | 1,635.84 |

|     |      |                                                                          |                                                                    |            |         |   |   |   |       |        |                                      |      |          |
|-----|------|--------------------------------------------------------------------------|--------------------------------------------------------------------|------------|---------|---|---|---|-------|--------|--------------------------------------|------|----------|
| ATP | 6011 | TM9SF4<br>protein                                                        | gi 1461867<br>97,gi 16606<br>3945,gi 172<br>047290                 | 74,351.10  | 100.00% | 4 | 4 | 4 | 0.04% | 10.30% | KCEVLC<br>GQSNKP<br>VTLTVE<br>QSR    | 3.14 | 2,319.18 |
| ATP | 6011 | PREDIC<br>TED:                                                           | gi 1946812<br>62                                                   | 204,931.90 | 99.90%  | 2 | 2 | 2 | 0.02% | 2.22%  | NLDTVQ<br>GSPLLV<br>GSDLLK           | 3.98 | 1,869.03 |
|     |      | similar to<br>plexin B2<br>isoform 1                                     |                                                                    |            |         |   |   |   |       |        |                                      |      |          |
| ATP | 6011 | PREDIC<br>TED:                                                           | gi 1946812<br>62                                                   | 204,931.90 | 99.90%  | 2 | 2 | 2 | 0.02% | 2.22%  | TPKLTH<br>DANETL<br>PLHLYV<br>KSAGK  | 3.53 | 2,533.38 |
|     |      | similar to<br>plexin B2<br>isoform 1                                     |                                                                    |            |         |   |   |   |       |        |                                      |      |          |
| ATP | 6011 | PREDIC<br>TED:                                                           | gi 1198930<br>91,gi 18417<br>58,gi 22859                           | 35,850.00  | 100.00% | 4 | 4 | 6 | 0.07% | 21.00% | AITIFQE<br>RDPANI<br>K               | 2.91 | 1,615.88 |
|     |      | Glycerald<br>ehyde-3-<br>phosphat<br>e<br>dehydrog<br>enase<br>isoform 2 | 03,gi 73587<br>299,gi 7740<br>4273,gi 895<br>73947                 |            |         |   |   |   |       |        |                                      |      |          |
| ATP | 6011 | PREDIC<br>TED:                                                           | gi 1198930<br>91,gi 18417<br>58,gi 22859                           | 35,850.00  | 100.00% | 4 | 4 | 6 | 0.07% | 21.00% | GAAQNII<br>PASTGA<br>AK              | 4.45 | 1,369.74 |
|     |      | Glycerald<br>ehyde-3-<br>phosphat<br>e<br>dehydrog<br>enase<br>isoform 2 | 03,gi 73587<br>299,gi 7740<br>4273,gi 895<br>73947                 |            |         |   |   |   |       |        |                                      |      |          |
| ATP | 6011 | PREDIC<br>TED:                                                           | gi 1198930<br>91,gi 18417<br>58,gi 22859                           | 35,850.00  | 100.00% | 4 | 4 | 6 | 0.07% | 21.00% | IVSNASC<br>TTNCLA<br>PLAK            | 2.57 | 1,705.86 |
|     |      | Glycerald<br>ehyde-3-<br>phosphat<br>e<br>dehydrog<br>enase<br>isoform 2 | 03,gi 73587<br>299,gi 7740<br>4273,gi 895<br>73947                 |            |         |   |   |   |       |        |                                      |      |          |
| ATP | 6011 | PREDIC<br>TED:                                                           | gi 1198930<br>91,gi 18417<br>58,gi 22859                           | 35,850.00  | 100.00% | 4 | 4 | 6 | 0.07% | 21.00% | VIHDHF<br>GIVEGL<br>MTTVHA<br>ITATQK | 3.22 | 2,634.37 |
|     |      | Glycerald<br>ehyde-3-<br>phosphat<br>e<br>dehydrog<br>enase<br>isoform 2 | 03,gi 73587<br>299,gi 7740<br>4273,gi 895<br>73947                 |            |         |   |   |   |       |        |                                      |      |          |
| ATP | 6011 | TMEM4<br>3 protein                                                       | gi 1515560<br>45,gi 15652<br>3072                                  | 44,774.20  | 99.80%  | 2 | 3 | 3 | 0.03% | 6.25%  | FFLSAGL<br>IDKVDN<br>FK              | 2.46 | 1,713.92 |
| ATP | 6011 | TMEM4<br>3 protein                                                       | gi 1515560<br>45,gi 15652<br>3072                                  | 44,774.20  | 99.80%  | 2 | 3 | 3 | 0.03% | 6.25%  | LEDPHV<br>DIIR                       | 2.87 | 1,206.65 |
| ATP | 6011 | intergral<br>membran<br>e protein<br>1                                   | gi 1140516<br>96,gi 12213<br>6222,gi 152<br>941168,gi 8<br>6823970 | 80,641.10  | 99.80%  | 2 | 2 | 2 | 0.02% | 3.69%  | FESVIHE<br>FDPYFN<br>YR              | 4.07 | 1,962.90 |

|     |      |                                                                                                            |                                                    |           |         |   |    |    |       |        |                                          |          |
|-----|------|------------------------------------------------------------------------------------------------------------|----------------------------------------------------|-----------|---------|---|----|----|-------|--------|------------------------------------------|----------|
| ATP | 6011 | intergral membrane protein 1                                                                               | gi 114051696,gi 122136222,gi 152941168,gi 86823970 | 80,641.10 | 99.80%  | 2 | 2  | 2  | 0.02% | 3.69%  | FYSLLDP 2.97<br>SYAK                     | 1,303.66 |
| ATP | 6011 | Myeloid-associated differentiation marker                                                                  | gi 111308557,gi 115497460                          | 35,291.10 | 99.80%  | 2 | 4  | 5  | 0.05% | 12.70% | ARPGEIT 3.67<br>GYMATV<br>PGLLK          | 1,890.02 |
| ATP | 6011 | Myeloid-associated differentiation marker                                                                  | gi 111308557,gi 115497460                          | 35,291.10 | 99.80%  | 2 | 4  | 5  | 0.05% | 12.70% | TTVTTT 4.35<br>MSSSSG<br>LGSPDIV<br>GSPR | 2,240.11 |
| ATP | 6011 | PREDICTED: similar to Keratin 10 (epidermolytic hyperkeratosis; keratosis palmaris et plantaris) isoform 2 | gi 194685481,gi 194685483                          | 54,832.90 | 100.00% | 8 | 10 | 36 | 0.39% | 14.10% | DAEAWF 3.05<br>NEK                       | 1,109.49 |
| ATP | 6011 | PREDICTED: similar to Keratin 10 (epidermolytic hyperkeratosis; keratosis palmaris et plantaris) isoform 2 | gi 194685481,gi 194685483                          | 54,832.90 | 100.00% | 8 | 10 | 36 | 0.39% | 14.10% | IRLENEI 4.44<br>QTYR                     | 1,434.77 |
| ATP | 6011 | PREDICTED: similar to Keratin 10 (epidermolytic hyperkeratosis; keratosis palmaris et plantaris) isoform 2 | gi 194685481,gi 194685483                          | 54,832.90 | 100.00% | 8 | 10 | 36 | 0.39% | 14.10% | LASYLD 3.26<br>KVR                       | 1,064.61 |

|     |      |                                                                                                                                              |           |         |   |    |    |       |        |                     |          |
|-----|------|----------------------------------------------------------------------------------------------------------------------------------------------|-----------|---------|---|----|----|-------|--------|---------------------|----------|
| ATP | 6011 | PREDIC TED: gi 1946854 81.gi 19468 similar to 5483<br>Keratin 10 (epiderm olytic hyperkera tosis; keratosis palmaris et plantaris) isoform 2 | 54,832.90 | 100.00% | 8 | 10 | 36 | 0.39% | 14.10% | LENEIQT 3.91 YR     | 1,165.58 |
| ATP | 6011 | PREDIC TED: gi 1946854 81.gi 19468 similar to 5483<br>Keratin 10 (epiderm olytic hyperkera tosis; keratosis palmaris et plantaris) isoform 2 | 54,832.90 | 100.00% | 8 | 10 | 36 | 0.39% | 14.10% | QSLEASL 4.43 AETEGR | 1,390.68 |
| ATP | 6011 | PREDIC TED: gi 1946854 81.gi 19468 similar to 5483<br>Keratin 10 (epiderm olytic hyperkera tosis; keratosis palmaris et plantaris) isoform 2 | 54,832.90 | 100.00% | 8 | 10 | 36 | 0.39% | 14.10% | QSVEADI 3.08 NGLR   | 1,201.62 |
| ATP | 6011 | PREDIC TED: gi 1946854 81.gi 19468 similar to 5483<br>Keratin 10 (epiderm olytic hyperkera tosis; keratosis palmaris et plantaris) isoform 2 | 54,832.90 | 100.00% | 8 | 10 | 36 | 0.39% | 14.10% | RVLDEL 2.91 TLTK    | 1,187.70 |
| ATP | 6011 | PREDIC TED: gi 1946854 81.gi 19468 similar to 5483<br>Keratin 10 (epiderm olytic hyperkera tosis; keratosis palmaris et plantaris) isoform 2 | 54,832.90 | 100.00% | 8 | 10 | 36 | 0.39% | 14.10% | SQYEQL 4.45 AEKNR   | 1,365.68 |

|     |      |                                                                                                                           |                                                 |           |         |   |    |    |       |        |                               |      |          |
|-----|------|---------------------------------------------------------------------------------------------------------------------------|-------------------------------------------------|-----------|---------|---|----|----|-------|--------|-------------------------------|------|----------|
| ATP | 6011 | PREDICTED:<br>similar to<br>Keratin 10<br>(epidermolytic hyperkeratosis;<br>keratosis palmaris et plantaris)<br>isoform 2 | gi 194685481.gi 194685483                       | 54,832.90 | 100.00% | 8 | 10 | 36 | 0.39% | 14.10% | VLDELT LTK                    | 3.79 | 1,031.60 |
| ATP | 6011 | MATR3 protein                                                                                                             | gi 134024643.gi 156523084                       | 93,810.30 | 99.80%  | 2 | 2  | 2  | 0.02% | 5.57%  | DLDELS RYPEDKI TPENLP QILLQLK | 3.34 | 3,080.65 |
| ATP | 6011 | MATR3 protein                                                                                                             | gi 134024643.gi 156523084                       | 93,810.30 | 99.80%  | 2 | 2  | 2  | 0.02% | 5.57%  | YQLLQL VEPFGVI SNHLILN K      | 3.51 | 2,438.38 |
| ATP | 6011 | Transferrin                                                                                                               | gi 113911795.gi 114326282                       | 77,721.80 | 100.00% | 2 | 2  | 2  | 0.02% | 3.41%  | DKPDNF QLFQSP HGK             | 3.99 | 1,757.86 |
| ATP | 6011 | Transferrin                                                                                                               | gi 113911795.gi 114326282                       | 77,721.80 | 100.00% | 2 | 2  | 2  | 0.02% | 3.41%  | YYGYTG AFR                    | 2.44 | 1,097.51 |
| ATP | 6011 | Mannose-6-phosphate receptor (cation dependent)                                                                           | gi 111308551.gi 119936494.gi 127292.gi 28461185 | 31,183.50 | 100.00% | 4 | 7  | 10 | 0.11% | 23.30% | GKESEK ELALLK                 | 3.93 | 1,344.77 |
| ATP | 6011 | Mannose-6-phosphate receptor (cation dependent)                                                                           | gi 111308551.gi 119936494.gi 127292.gi 28461185 | 31,183.50 | 100.00% | 4 | 7  | 10 | 0.11% | 23.30% | GVGDDQ LGEESEE RDDHLL PM      | 2.55 | 2,357.02 |
| ATP | 6011 | Mannose-6-phosphate receptor (cation dependent)                                                                           | gi 111308551.gi 119936494.gi 127292.gi 28461185 | 31,183.50 | 100.00% | 4 | 7  | 10 | 0.11% | 23.30% | HTLADN FNPVSEER               | 4.59 | 1,628.77 |
| ATP | 6011 | Mannose-6-phosphate receptor (cation dependent)                                                                           | gi 111308551.gi 119936494.gi 127292.gi 28461185 | 31,183.50 | 100.00% | 4 | 7  | 10 | 0.11% | 23.30% | SFESTVG QSPDMY SYVFR          | 3.56 | 2,115.93 |
| ATP | 6011 | ADP-ribosylation-like factor 6 interacting protein 5                                                                      | gi 59858163.gi 62460474.gi 74354855.gi 75057806 | 21,648.60 | 99.80%  | 2 | 3  | 3  | 0.03% | 13.80% | FARPDF R                      | 1.84 | 908.4737 |



|     |      |                                                                          |                                                 |           |         |   |   |   |       |        |                                                      |      |          |
|-----|------|--------------------------------------------------------------------------|-------------------------------------------------|-----------|---------|---|---|---|-------|--------|------------------------------------------------------|------|----------|
| ATP | 6011 | ADP-ribosylation-like factor 6 interacting protein 5                     | gi 59858163,gi 62460474,gi 74354855,gi 75057806 | 21,648.60 | 99.80%  | 2 | 3 | 3 | 0.03% | 13.80% | TPMGIV<br>LDALEQ<br>QEETITK                          | 6.07 | 2,132.08 |
| ATP | 6011 | Heterogeneous nuclear ribonucleoprotein U (scaffold attachment factor A) | gi 124828988,gi 125991756                       | 90,435.30 | 100.00% | 3 | 3 | 5 | 0.05% | 8.36%  | EKPYFPI<br>PEDYTFI<br>QNVPLE<br>DR                   | 5.13 | 2,710.34 |
| ATP | 6011 | Heterogeneous nuclear ribonucleoprotein U (scaffold attachment factor A) | gi 124828988,gi 125991756                       | 90,435.30 | 100.00% | 3 | 3 | 5 | 0.05% | 8.36%  | LQAALD<br>DEEAGG<br>RPAMEP<br>GNGLSD<br>LGGDSA<br>GR | 5.88 | 3,142.43 |
| ATP | 6011 | Heterogeneous nuclear ribonucleoprotein U (scaffold attachment factor A) | gi 124828988,gi 125991756                       | 90,435.30 | 100.00% | 3 | 3 | 5 | 0.05% | 8.36%  | NFIELDQT<br>NVSAAA<br>QR                             | 3.29 | 1,647.84 |
| ATP | 6011 | Ectonucleotidyl transferase 4 (putative function)                        | gi 124829038,gi 125630707,gi 171769867          | 51,147.90 | 100.00% | 3 | 3 | 3 | 0.03% | 9.27%  | ADYLQN<br>YEFPHL<br>QNFIK                            | 2.64 | 2,140.05 |
| ATP | 6011 | Ectonucleotidyl transferase 4 (putative function)                        | gi 124829038,gi 125630707,gi 171769867          | 51,147.90 | 100.00% | 3 | 3 | 3 | 0.03% | 9.27%  | LLVVSFD<br>GFR                                       | 2.95 | 1,166.66 |
| ATP | 6011 | Ectonucleotidyl transferase 4 (putative function)                        | gi 124829038,gi 125630707,gi 171769867          | 51,147.90 | 100.00% | 3 | 3 | 3 | 0.03% | 9.27%  | VLEEIDE<br>HIGELV<br>HR                              | 2.74 | 1,787.93 |
| ATP | 6011 | DPYSL3 protein                                                           | gi 154426078,gi 155371867                       | 73,970.90 | 100.00% | 5 | 5 | 5 | 0.05% | 10.50% | EESREPA<br>PASPAPA<br>GVEIR                          | 3.8  | 1,962.99 |

|     |      |                                                                                           |                                                                                                                  |           |         |    |    |    |       |        |                                            |          |
|-----|------|-------------------------------------------------------------------------------------------|------------------------------------------------------------------------------------------------------------------|-----------|---------|----|----|----|-------|--------|--------------------------------------------|----------|
| ATP | 6011 | DPYSL3 protein                                                                            | gi 154426078,gi 155371867                                                                                        | 73,970.90 | 100.00% | 5  | 5  | 5  | 0.05% | 10.50% | GMTTVD 2.84<br>DFFQGT<br>K                 | 1,462.65 |
| ATP | 6011 | DPYSL3 protein                                                                            | gi 154426078,gi 155371867                                                                                        | 73,970.90 | 100.00% | 5  | 5  | 5  | 0.05% | 10.50% | NHQSAA 3.97<br>EYNIFEG<br>MELR             | 2,024.91 |
| ATP | 6011 | DPYSL3 protein                                                                            | gi 154426078,gi 155371867                                                                                        | 73,970.90 | 100.00% | 5  | 5  | 5  | 0.05% | 10.50% | QIGDNLI 2.52<br>VPGGVK                     | 1,309.75 |
| ATP | 6011 | DPYSL3 protein                                                                            | gi 154426078,gi 155371867                                                                                        | 73,970.90 | 100.00% | 5  | 5  | 5  | 0.05% | 10.50% | SAADLIS 3.12<br>QAR                        | 1,031.55 |
| ATP | 6011 | TOMM2 2 protein                                                                           | gi 151556851,gi 154152189                                                                                        | 15,275.00 | 100.00% | 3  | 5  | 7  | 0.08% | 44.30% | GDAEKP 3.52<br>EEEELEE<br>DDEELD<br>ETLSER | 2,935.23 |
| ATP | 6011 | TOMM2 2 protein                                                                           | gi 151556851,gi 154152189                                                                                        | 15,275.00 | 100.00% | 3  | 5  | 7  | 0.08% | 44.30% | LQMEQQ 4.36<br>QQLQQR                      | 1,573.78 |
| ATP | 6011 | TOMM2 2 protein                                                                           | gi 151556851,gi 154152189                                                                                        | 15,275.00 | 100.00% | 3  | 5  | 7  | 0.08% | 44.30% | QILLGPN 3.9<br>TGLSGG<br>MPGALP<br>SLPGKI  | 2,404.33 |
| ATP | 6011 | RecName :<br>Full=ATP<br>synthase subunit beta,<br>mitochon drial;<br>Flags:<br>Precursor | gi 114543,gi 15842902<br>3,gi 158429024,gi 158429025,gi 158431069,gi 158431070,gi 158431071,gi 284619457<br>4271 | 51,687.60 | 100.00% | 19 | 25 | 44 | 0.48% | 69.90% | AIAELGI 4.53<br>YPAVDP<br>LDSTSR           | 1,988.03 |
| ATP | 6011 | RecName :<br>Full=ATP<br>synthase subunit beta,<br>mitochon drial;<br>Flags:<br>Precursor | gi 114543,gi 15842902<br>3,gi 158429024,gi 158429025,gi 158431069,gi 158431070,gi 158431071,gi 284619457<br>4271 | 51,687.60 | 100.00% | 19 | 25 | 44 | 0.48% | 69.90% | DQEQD 5.12<br>VLLFIDN<br>IFR               | 1,921.97 |
| ATP | 6011 | RecName :<br>Full=ATP<br>synthase subunit beta,<br>mitochon drial;<br>Flags:<br>Precursor | gi 114543,gi 15842902<br>3,gi 158429024,gi 158429025,gi 158431069,gi 158431070,gi 158431071,gi 284619457<br>4271 | 51,687.60 | 100.00% | 19 | 25 | 44 | 0.48% | 69.90% | FLSQPFQ 4.02<br>VAEVFT<br>GHLGK            | 2,005.05 |

|     |      |                                                                                                           |                                                                                                                                                         |           |         |    |    |    |       |        |                                                          |      |          |
|-----|------|-----------------------------------------------------------------------------------------------------------|---------------------------------------------------------------------------------------------------------------------------------------------------------|-----------|---------|----|----|----|-------|--------|----------------------------------------------------------|------|----------|
| ATP | 6011 | RecName<br>:<br>Full=AT<br>P<br>synthase<br>subunit<br>beta,<br>mitochon<br>drial;<br>Flags:<br>Precursor | gi 114543.g<br>i 15842902<br>3,gi 158429<br>024,gi 1584<br>29025,gi 15<br>8431069,gi <br>158431070,<br>gi 1584310<br>71,gi 28461<br>221,gi 9457<br>4271 | 51,687.60 | 100.00% | 19 | 25 | 44 | 0.48% | 69.90% | FTQAGS<br>EVSALL<br>GR                                   | 4.15 | 1,435.75 |
| ATP | 6011 | RecName<br>:<br>Full=AT<br>P<br>synthase<br>subunit<br>beta,<br>mitochon<br>drial;<br>Flags:<br>Precursor | gi 114543.g<br>i 15842902<br>3,gi 158429<br>024,gi 1584<br>29025,gi 15<br>8431069,gi <br>158431070,<br>gi 1584310<br>71,gi 28461<br>221,gi 9457<br>4271 | 51,687.60 | 100.00% | 19 | 25 | 44 | 0.48% | 69.90% | GFQQILA<br>GEYDHL<br>PEQAFY<br>MVGPIE<br>EAVAK           | 2.62 | 3,350.64 |
| ATP | 6011 | RecName<br>:<br>Full=AT<br>P<br>synthase<br>subunit<br>beta,<br>mitochon<br>drial;<br>Flags:<br>Precursor | gi 114543.g<br>i 15842902<br>3,gi 158429<br>024,gi 1584<br>29025,gi 15<br>8431069,gi <br>158431070,<br>gi 1584310<br>71,gi 28461<br>221,gi 9457<br>4271 | 51,687.60 | 100.00% | 19 | 25 | 44 | 0.48% | 69.90% | GSITSVQ<br>AIYVPA<br>DDLTPD<br>APATTF<br>AHLDAT<br>TVLSR | 2.67 | 3,714.89 |
| ATP | 6011 | RecName<br>:<br>Full=AT<br>P<br>synthase<br>subunit<br>beta,<br>mitochon<br>drial;<br>Flags:<br>Precursor | gi 114543.g<br>i 15842902<br>3,gi 158429<br>024,gi 1584<br>29025,gi 15<br>8431069,gi <br>158431070,<br>gi 1584310<br>71,gi 28461<br>221,gi 9457<br>4271 | 51,687.60 | 100.00% | 19 | 25 | 44 | 0.48% | 69.90% | IMDPNIV<br>GSEHYD<br>VAR                                 | 3.78 | 1,831.86 |
| ATP | 6011 | RecName<br>:<br>Full=AT<br>P<br>synthase<br>subunit<br>beta,<br>mitochon<br>drial;<br>Flags:<br>Precursor | gi 114543.g<br>i 15842902<br>3,gi 158429<br>024,gi 1584<br>29025,gi 15<br>8431069,gi <br>158431070,<br>gi 1584310<br>71,gi 28461<br>221,gi 9457<br>4271 | 51,687.60 | 100.00% | 19 | 25 | 44 | 0.48% | 69.90% | IMNVIGE<br>PIDER                                         | 3.56 | 1,401.70 |

|     |      |                                                                                                           |                                                                                                                                                         |           |         |    |    |    |       |        |                                               |      |          |
|-----|------|-----------------------------------------------------------------------------------------------------------|---------------------------------------------------------------------------------------------------------------------------------------------------------|-----------|---------|----|----|----|-------|--------|-----------------------------------------------|------|----------|
| ATP | 6011 | RecName<br>:<br>Full=AT<br>P<br>synthase<br>subunit<br>beta,<br>mitochon<br>drial;<br>Flags:<br>Precursor | gi 114543.g<br>i 15842902<br>3,gi 158429<br>024,gi 1584<br>29025,gi 15<br>8431069,gi <br>158431070,<br>gi 1584310<br>71,gi 28461<br>221,gi 9457<br>4271 | 51,687.60 | 100.00% | 19 | 25 | 44 | 0.48% | 69.90% | IMNVIGE<br>PIDERGP<br>IK                      | 3.69 | 1,796.96 |
| ATP | 6011 | RecName<br>:<br>Full=AT<br>P<br>synthase<br>subunit<br>beta,<br>mitochon<br>drial;<br>Flags:<br>Precursor | gi 114543.g<br>i 15842902<br>3,gi 158429<br>024,gi 1584<br>29025,gi 15<br>8431069,gi <br>158431070,<br>gi 1584310<br>71,gi 28461<br>221,gi 9457<br>4271 | 51,687.60 | 100.00% | 19 | 25 | 44 | 0.48% | 69.90% | IPSAVGY<br>QPTLAT<br>DMGTM<br>QER             | 4.58 | 2,282.08 |
| ATP | 6011 | RecName<br>:<br>Full=AT<br>P<br>synthase<br>subunit<br>beta,<br>mitochon<br>drial;<br>Flags:<br>Precursor | gi 114543.g<br>i 15842902<br>3,gi 158429<br>024,gi 1584<br>29025,gi 15<br>8431069,gi <br>158431070,<br>gi 1584310<br>71,gi 28461<br>221,gi 9457<br>4271 | 51,687.60 | 100.00% | 19 | 25 | 44 | 0.48% | 69.90% | IPVGPET<br>LGR                                | 3.01 | 1,038.59 |
| ATP | 6011 | RecName<br>:<br>Full=AT<br>P<br>synthase<br>subunit<br>beta,<br>mitochon<br>drial;<br>Flags:<br>Precursor | gi 114543.g<br>i 15842902<br>3,gi 158429<br>024,gi 1584<br>29025,gi 15<br>8431069,gi <br>158431070,<br>gi 1584310<br>71,gi 28461<br>221,gi 9457<br>4271 | 51,687.60 | 100.00% | 19 | 25 | 44 | 0.48% | 69.90% | IVAVIGA<br>VVDVQF<br>DEGLPPI<br>LNALEV<br>QGR | 4.21 | 3,031.68 |
| ATP | 6011 | RecName<br>:<br>Full=AT<br>P<br>synthase<br>subunit<br>beta,<br>mitochon<br>drial;<br>Flags:<br>Precursor | gi 114543.g<br>i 15842902<br>3,gi 158429<br>024,gi 1584<br>29025,gi 15<br>8431069,gi <br>158431070,<br>gi 1584310<br>71,gi 28461<br>221,gi 9457<br>4271 | 51,687.60 | 100.00% | 19 | 25 | 44 | 0.48% | 69.90% | LVLEVA<br>QHLGES<br>TVR                       | 4.94 | 1,650.92 |

|     |      |                                                                                                           |                                                                                                                                                         |           |         |    |    |    |       |        |                                             |      |          |
|-----|------|-----------------------------------------------------------------------------------------------------------|---------------------------------------------------------------------------------------------------------------------------------------------------------|-----------|---------|----|----|----|-------|--------|---------------------------------------------|------|----------|
| ATP | 6011 | RecName<br>:<br>Full=AT<br>P<br>synthase<br>subunit<br>beta,<br>mitochon<br>drial;<br>Flags:<br>Precursor | gi 114543.g<br>i 15842902<br>3,gi 158429<br>024,gi 1584<br>29025,gi 15<br>8431069,gi <br>158431070,<br>gi 1584310<br>71,gi 28461<br>221,gi 9457<br>4271 | 51,687.60 | 100.00% | 19 | 25 | 44 | 0.48% | 69.90% | QFAAIH<br>AEAPEF<br>VEMSVE<br>QEILVTG<br>IK | 5.39 | 3,002.52 |
| ATP | 6011 | RecName<br>:<br>Full=AT<br>P<br>synthase<br>subunit<br>beta,<br>mitochon<br>drial;<br>Flags:<br>Precursor | gi 114543.g<br>i 15842902<br>3,gi 158429<br>024,gi 1584<br>29025,gi 15<br>8431069,gi <br>158431070,<br>gi 1584310<br>71,gi 28461<br>221,gi 9457<br>4271 | 51,687.60 | 100.00% | 19 | 25 | 44 | 0.48% | 69.90% | TREGND<br>LYHEMI<br>ESGVINL<br>K            | 2.79 | 2,334.14 |
| ATP | 6011 | RecName<br>:<br>Full=AT<br>P<br>synthase<br>subunit<br>beta,<br>mitochon<br>drial;<br>Flags:<br>Precursor | gi 114543.g<br>i 15842902<br>3,gi 158429<br>024,gi 1584<br>29025,gi 15<br>8431069,gi <br>158431070,<br>gi 1584310<br>71,gi 28461<br>221,gi 9457<br>4271 | 51,687.60 | 100.00% | 19 | 25 | 44 | 0.48% | 69.90% | TVLIMEL<br>INNVAK                           | 4.07 | 1,473.83 |
| ATP | 6011 | RecName<br>:<br>Full=AT<br>P<br>synthase<br>subunit<br>beta,<br>mitochon<br>drial;<br>Flags:<br>Precursor | gi 114543.g<br>i 15842902<br>3,gi 158429<br>024,gi 1584<br>29025,gi 15<br>8431069,gi <br>158431070,<br>gi 1584310<br>71,gi 28461<br>221,gi 9457<br>4271 | 51,687.60 | 100.00% | 19 | 25 | 44 | 0.48% | 69.90% | VALTGL<br>TVAEYF<br>R                       | 4.17 | 1,439.79 |
| ATP | 6011 | RecName<br>:<br>Full=AT<br>P<br>synthase<br>subunit<br>beta,<br>mitochon<br>drial;<br>Flags:<br>Precursor | gi 114543.g<br>i 15842902<br>3,gi 158429<br>024,gi 1584<br>29025,gi 15<br>8431069,gi <br>158431070,<br>gi 1584310<br>71,gi 28461<br>221,gi 9457<br>4271 | 51,687.60 | 100.00% | 19 | 25 | 44 | 0.48% | 69.90% | VALVYG<br>QMNEPP<br>GAR                     | 3.6  | 1,617.81 |

|     |      |                                                                                                           |                                                                                                                                                         |            |         |    |    |    |       |        |                                   |      |          |
|-----|------|-----------------------------------------------------------------------------------------------------------|---------------------------------------------------------------------------------------------------------------------------------------------------------|------------|---------|----|----|----|-------|--------|-----------------------------------|------|----------|
| ATP | 6011 | RecName<br>:<br>Full=AT<br>P<br>synthase<br>subunit<br>beta,<br>mitochon<br>drial;<br>Flags:<br>Precursor | gi 114543,g<br>i 15842902<br>3,gi 158429<br>024,gi 1584<br>29025,gi 15<br>8431069,gi <br>158431070,<br>gi 1584310<br>71,gi 28461<br>221,gi 9457<br>4271 | 51,687.60  | 100.00% | 19 | 25 | 44 | 0.48% | 69.90% | VLDSGA<br>PIRIPVG<br>PETLGR       | 4.47 | 1,947.10 |
| ATP | 6011 | RecName<br>:<br>Full=Sto<br>matin-<br>like<br>protein 2;<br>Short=SL<br>P-2                               | gi 1185738<br>93,gi 14874<br>5563,gi 816<br>74229,gi 84<br>000113                                                                                       | 38,715.70  | 100.00% | 4  | 6  | 7  | 0.08% | 18.80% | AEQINQ<br>AAGEAS<br>AVLAK         | 4.48 | 1,670.87 |
| ATP | 6011 | RecName<br>:<br>Full=Sto<br>matin-<br>like<br>protein 2;<br>Short=SL<br>P-2                               | gi 1185738<br>93,gi 14874<br>5563,gi 816<br>74229,gi 84<br>000113                                                                                       | 38,715.70  | 100.00% | 4  | 6  | 7  | 0.08% | 18.80% | ASYGVE<br>DPEYAV<br>TQLAQT<br>TMR | 4.59 | 2,346.09 |
| ATP | 6011 | RecName<br>:<br>Full=Sto<br>matin-<br>like<br>protein 2;<br>Short=SL<br>P-2                               | gi 1185738<br>93,gi 14874<br>5563,gi 816<br>74229,gi 84<br>000113                                                                                       | 38,715.70  | 100.00% | 4  | 6  | 7  | 0.08% | 18.80% | ILEPGLN<br>ILIPVLD<br>R           | 4.31 | 1,675.02 |
| ATP | 6011 | RecName<br>:<br>Full=Sto<br>matin-<br>like<br>protein 2;<br>Short=SL<br>P-2                               | gi 1185738<br>93,gi 14874<br>5563,gi 816<br>74229,gi 84<br>000113                                                                                       | 38,715.70  | 100.00% | 4  | 6  | 7  | 0.08% | 18.80% | STDASL<br>DEELDR<br>VK            | 3.7  | 1,577.77 |
| ATP | 6011 | PREDIC<br>TED:<br>similar to<br>CD109,<br>partial                                                         | gi 1199213<br>75                                                                                                                                        | 142,518.70 | 100.00% | 2  | 3  | 3  | 0.03% | 2.59%  | SYSQSIL<br>LDLTDS<br>TLQTTL<br>K  | 3.91 | 2,227.17 |
| ATP | 6011 | PREDIC<br>TED:<br>similar to<br>CD109,<br>partial                                                         | gi 1199213<br>75                                                                                                                                        | 142,518.70 | 100.00% | 2  | 3  | 3  | 0.03% | 2.59%  | VGSPFEL<br>VVIGNK                 | 3.38 | 1,358.77 |
| ATP | 6011 | S100<br>calcium<br>binding<br>protein<br>A16                                                              | gi 1113075<br>29,gi 11549<br>7862,gi 122<br>142422                                                                                                      | 11,758.80  | 100.00% | 3  | 3  | 4  | 0.04% | 26.20% | AADKLI<br>QNLDAN<br>HDGR          | 2.58 | 1,750.88 |
| ATP | 6011 | S100<br>calcium<br>binding<br>protein<br>A16                                                              | gi 1113075<br>29,gi 11549<br>7862,gi 122<br>142422                                                                                                      | 11,758.80  | 100.00% | 3  | 3  | 4  | 0.04% | 26.20% | AVVVLV<br>ENFYK                   | 3.09 | 1,280.72 |

|     |      |                                  |                                        |           |         |   |   |    |       |        |                                                   |          |
|-----|------|----------------------------------|----------------------------------------|-----------|---------|---|---|----|-------|--------|---------------------------------------------------|----------|
| ATP | 6011 | S100 calcium binding protein A16 | gi 111307529,gi 115497862,gi 122142422 | 11,758.80 | 100.00% | 3 | 3 | 4  | 0.04% | 26.20% | LIQN LDA 2.59<br>NHDGR                            | 1,365.69 |
| ATP | 6011 | CHMP4 B protein                  | gi 116874509,gi 190360743              | 24,919.20 | 99.80%  | 2 | 2 | 3  | 0.03% | 13.40% | EALENA 3.84<br>NTNTEV<br>LK                       | 1,545.78 |
| ATP | 6011 | CHMP4 B protein                  | gi 116874509,gi 190360743              | 24,919.20 | 99.80%  | 2 | 2 | 3  | 0.03% | 13.40% | QLAQID 3.3<br>GTLSTIE<br>FQR                      | 1,819.96 |
| ATP | 6011 | EH-domain containin g 2          | gi 114051716,gi 86822020               | 61,201.30 | 100.00% | 5 | 5 | 5  | 0.05% | 13.60% | GYDFPA 2.48<br>VLR                                | 1,037.54 |
| ATP | 6011 | EH-domain containin g 2          | gi 114051716,gi 86822020               | 61,201.30 | 100.00% | 5 | 5 | 5  | 0.05% | 13.60% | LFELEE Q 4.42<br>DLFRDIQ<br>GLPR                  | 2,218.15 |
| ATP | 6011 | EH-domain containin g 2          | gi 114051716,gi 86822020               | 61,201.30 | 100.00% | 5 | 5 | 5  | 0.05% | 13.60% | LLEALD 4.19<br>EMLTHD<br>IAK                      | 1,727.89 |
| ATP | 6011 | EH-domain containin g 2          | gi 114051716,gi 86822020               | 61,201.30 | 100.00% | 5 | 5 | 5  | 0.05% | 13.60% | SKYDEIF 3.75<br>YNLAPA<br>DGK                     | 1,830.89 |
| ATP | 6011 | EH-domain containin g 2          | gi 114051716,gi 86822020               | 61,201.30 | 100.00% | 5 | 5 | 5  | 0.05% | 13.60% | TSFIQYL 3.36<br>LEQEV P<br>GSR                    | 1,866.96 |
| ATP | 6011 | SSR1 protein                     | gi 151553610,gi 156120891,gi 187611488 | 32,036.80 | 100.00% | 4 | 5 | 13 | 0.14% | 21.70% | FLVGFT 2.54<br>NK                                 | 925.5142 |
| ATP | 6011 | SSR1 protein                     | gi 151553610,gi 156120891,gi 187611488 | 32,036.80 | 100.00% | 4 | 5 | 13 | 0.14% | 21.70% | GEDFPA 3.86<br>NNIVK                              | 1,203.60 |
| ATP | 6011 | SSR1 protein                     | gi 151553610,gi 156120891,gi 187611488 | 32,036.80 | 100.00% | 4 | 5 | 13 | 0.14% | 21.70% | GTEDFIV 4.22<br>ESLDASF<br>R                      | 1,685.80 |
| ATP | 6011 | SSR1 protein                     | gi 151553610,gi 156120891,gi 187611488 | 32,036.80 | 100.00% | 4 | 5 | 13 | 0.14% | 21.70% | QATFEY 2.15<br>SFIPAEP<br>MGGRPF<br>GLVINLN<br>YK | 3,175.59 |
| ATP | 6011 | GTP-binding protein MX2          | gi 13430404,gi 27806835,gi 75066885    | 81,436.40 | 100.00% | 5 | 6 | 7  | 0.08% | 9.58%  | ALGVEQ 4.68<br>DLALPAI<br>AVIGDQ<br>SSGK          | 2,252.21 |
| ATP | 6011 | GTP-binding protein MX2          | gi 13430404,gi 27806835,gi 75066885    | 81,436.40 | 100.00% | 5 | 6 | 7  | 0.08% | 9.58%  | LTQAQQ 3.8<br>ALYEF P<br>HFK                      | 1,820.93 |
| ATP | 6011 | GTP-binding protein MX2          | gi 13430404,gi 27806835,gi 75066885    | 81,436.40 | 100.00% | 5 | 6 | 7  | 0.08% | 9.58%  | LTQAQQ 4.43<br>ALYEF P<br>HFKG                    | 1,877.95 |
| ATP | 6011 | GTP-binding protein MX2          | gi 13430404,gi 27806835,gi 75066885    | 81,436.40 | 100.00% | 5 | 6 | 7  | 0.08% | 9.58%  | SSVLEAL 4.6<br>SGVALP<br>R                        | 1,398.80 |
| ATP | 6011 | GTP-binding protein MX2          | gi 13430404,gi 27806835,gi 75066885    | 81,436.40 | 100.00% | 5 | 6 | 7  | 0.08% | 9.58%  | VAVENQ 4.51<br>PQDIGLQ<br>IK                      | 1,651.90 |

|     |      |                                                                                                                                     |           |         |   |    |    |       |        |                                       |          |
|-----|------|-------------------------------------------------------------------------------------------------------------------------------------|-----------|---------|---|----|----|-------|--------|---------------------------------------|----------|
| ATP | 6011 | coiled-coil-helix-9,gi 5985833<br>coiled-coil-helix-70,gi 74354<br>coiled-coil-helix-006,gi 7836<br>domain 5273<br>containin<br>g 3 | 26,082.40 | 100.00% | 5 | 5  | 10 | 0.11% | 26.00% | KQDAFY 4.78<br>KEQLAR                 | 1,496.79 |
| ATP | 6011 | coiled-coil-helix-9,gi 5985833<br>coiled-coil-helix-70,gi 74354<br>coiled-coil-helix-006,gi 7836<br>domain 5273<br>containin<br>g 3 | 26,082.40 | 100.00% | 5 | 5  | 10 | 0.11% | 26.00% | QNTQQT 3.82<br>LSCSAL<br>ASQYMR       | 2,045.94 |
| ATP | 6011 | coiled-coil-helix-9,gi 5985833<br>coiled-coil-helix-70,gi 74354<br>coiled-coil-helix-006,gi 7836<br>domain 5273<br>containin<br>g 3 | 26,082.40 | 100.00% | 5 | 5  | 10 | 0.11% | 26.00% | RVAEEL 5.44<br>ALEQAK<br>K            | 1,484.84 |
| ATP | 6011 | coiled-coil-helix-9,gi 5985833<br>coiled-coil-helix-70,gi 74354<br>coiled-coil-helix-006,gi 7836<br>domain 5273<br>containin<br>g 3 | 26,082.40 | 100.00% | 5 | 5  | 10 | 0.11% | 26.00% | RVTFEA 2.83<br>DENENIT<br>VVK         | 1,863.94 |
| ATP | 6011 | coiled-coil-helix-9,gi 5985833<br>coiled-coil-helix-70,gi 74354<br>coiled-coil-helix-006,gi 7836<br>domain 5273<br>containin<br>g 3 | 26,082.40 | 100.00% | 5 | 5  | 10 | 0.11% | 26.00% | VAEELA 4.56<br>LEQAK                  | 1,200.65 |
| ATP | 6011 | integrin beta 1<br>gi 1111831<br>55,gi 21856<br>3327                                                                                | 88,075.70 | 100.00% | 8 | 11 | 21 | 0.23% | 14.70% | IGFGSFV 2.47<br>EK                    | 983.5197 |
| ATP | 6011 | integrin beta 1<br>gi 1111831<br>55,gi 21856<br>3327                                                                                | 88,075.70 | 100.00% | 8 | 11 | 21 | 0.23% | 14.70% | LLVFSTD 2.91<br>AGFHFA<br>GDGK        | 1,781.89 |
| ATP | 6011 | integrin beta 1<br>gi 1111831<br>55,gi 21856<br>3327                                                                                | 88,075.70 | 100.00% | 8 | 11 | 21 | 0.23% | 14.70% | LQPEDIT 5.25<br>QIQPQL<br>VLQLR       | 2,260.27 |
| ATP | 6011 | integrin beta 1<br>gi 1111831<br>55,gi 21856<br>3327                                                                                | 88,075.70 | 100.00% | 8 | 11 | 21 | 0.23% | 14.70% | LENNIQ 4.25<br>TIFAVTE<br>EFQPVY<br>K | 2,470.25 |
| ATP | 6011 | integrin beta 1<br>gi 1111831<br>55,gi 21856<br>3327                                                                                | 88,075.70 | 100.00% | 8 | 11 | 21 | 0.23% | 14.70% | NVLSLT 5.2<br>DKGEVF<br>NELVGK        | 1,962.05 |
| ATP | 6011 | integrin beta 1<br>gi 1111831<br>55,gi 21856<br>3327                                                                                | 88,075.70 | 100.00% | 8 | 11 | 21 | 0.23% | 14.70% | SGEPQTF 2.48<br>TLK                   | 1,107.57 |
| ATP | 6011 | integrin beta 1<br>gi 1111831<br>55,gi 21856<br>3327                                                                                | 88,075.70 | 100.00% | 8 | 11 | 21 | 0.23% | 14.70% | SLGTDL 2.68<br>MNEMR                  | 1,282.58 |
| ATP | 6011 | integrin beta 1<br>gi 1111831<br>55,gi 21856<br>3327                                                                                | 88,075.70 | 100.00% | 8 | 11 | 21 | 0.23% | 14.70% | TVMPYI 2.77<br>STTPAK                 | 1,324.68 |
| ATP | 6011 | TPM3 protein 2<br>gi 7915347                                                                                                        | 29,015.30 | 100.00% | 6 | 7  | 7  | 0.08% | 25.40% | ALKDEE 3.71<br>KMELQE<br>IQLK         | 1,961.03 |
| ATP | 6011 | TPM3 protein 2<br>gi 7915347                                                                                                        | 29,015.30 | 100.00% | 6 | 7  | 7  | 0.08% | 25.40% | AREQAE 3.65<br>AEVASL<br>NRR          | 1,699.88 |
| ATP | 6011 | TPM3 protein 2<br>gi 7915347                                                                                                        | 29,015.30 | 100.00% | 6 | 7  | 7  | 0.08% | 25.40% | IQLVEEE 3.28<br>LDR                   | 1,243.65 |



|     |      |                                                                                                                                                                                                            |                           |           |         |   |   |   |       |        |                            |      |          |
|-----|------|------------------------------------------------------------------------------------------------------------------------------------------------------------------------------------------------------------|---------------------------|-----------|---------|---|---|---|-------|--------|----------------------------|------|----------|
| ATP | 6011 | TPM3<br>protein                                                                                                                                                                                            | gi 7915347<br>2           | 29,015.30 | 100.00% | 6 | 7 | 7 | 0.08% | 25.40% | IQLVEEE<br>LDRAQE<br>R     | 3.36 | 1,727.89 |
| ATP | 6011 | TPM3<br>protein                                                                                                                                                                                            | gi 7915347<br>2           | 29,015.30 | 100.00% | 6 | 7 | 7 | 0.08% | 25.40% | KIQVLQ<br>QQADDA<br>EERAER | 3.58 | 2,127.08 |
| ATP | 6011 | TPM3<br>protein                                                                                                                                                                                            | gi 7915347<br>2           | 29,015.30 | 100.00% | 6 | 7 | 7 | 0.08% | 25.40% | RIQLVEE<br>ELDRAQ<br>ER    | 3.36 | 1,883.99 |
| ATP | 6011 | RecName<br>:<br>Full=Volt<br>age-<br>dependen<br>t anion-<br>selective<br>channel<br>protein 3;<br>Short=V<br>DAC-3;<br>AltName:<br>Full=Out<br>er<br>mitochon<br>drial<br>membran<br>e protein<br>porin 3 | gi 1312445<br>2,gi 148878 | 30,853.30 | 100.00% | 4 | 5 | 6 | 0.07% | 19.40% | LSQNNF<br>ALGYK            | 3.6  | 1,254.65 |
| ATP | 6011 | RecName<br>:<br>Full=Volt<br>age-<br>dependen<br>t anion-<br>selective<br>channel<br>protein 3;<br>Short=V<br>DAC-3;<br>AltName:<br>Full=Out<br>er<br>mitochon<br>drial<br>membran<br>e protein<br>porin 3 | gi 1312445<br>2,gi 148878 | 30,853.30 | 100.00% | 4 | 5 | 6 | 0.07% | 19.40% | LTLDTIF<br>VPNTGK          | 2.98 | 1,418.79 |

|     |      |                                                                                                                                                                                                                                                                |            |           |         |   |   |       |        |                                       |                             |          |
|-----|------|----------------------------------------------------------------------------------------------------------------------------------------------------------------------------------------------------------------------------------------------------------------|------------|-----------|---------|---|---|-------|--------|---------------------------------------|-----------------------------|----------|
| ATP | 6011 | RecName gi 1312445 :<br>2,gi 148878<br>Full=Volt 077,gi 2780<br>age- 7415,gi 881<br>dependen 0224<br>t anion-<br>selective<br>channel<br>protein 3;<br>Short=V<br>DAC-3;<br>AltName:<br>Full=Out<br>er<br>mitochon<br>drial<br>membran<br>e protein<br>porin 3 | 30,853.30  | 100.00%   | 4       | 5 | 6 | 0.07% | 19.40% | LTLDTIF 3.62<br>VPNTGK<br>K           | 1,546.88                    |          |
| ATP | 6011 | RecName gi 1312445 :<br>2,gi 148878<br>Full=Volt 077,gi 2780<br>age- 7415,gi 881<br>dependen 0224<br>t anion-<br>selective<br>channel<br>protein 3;<br>Short=V<br>DAC-3;<br>AltName:<br>Full=Out<br>er<br>mitochon<br>drial<br>membran<br>e protein<br>porin 3 | 30,853.30  | 100.00%   | 4       | 5 | 6 | 0.07% | 19.40% | LTLSALI 3.27<br>DGK                   | 1,030.61                    |          |
| ATP | 6011 | RecName gi 1312445 :<br>2,gi 148878<br>Full=Volt 077,gi 2780<br>age- 7415,gi 881<br>dependen 0224<br>t anion-<br>selective<br>channel<br>protein 3;<br>Short=V<br>DAC-3;<br>AltName:<br>Full=Out<br>er<br>mitochon<br>drial<br>membran<br>e protein<br>porin 3 | 30,853.30  | 100.00%   | 4       | 5 | 6 | 0.07% | 19.40% | VNNASLI 4.28<br>GLGYTQ<br>TLRPGV<br>K | 2,101.18                    |          |
| ATP | 6011 | SLC25A 3 protein 64                                                                                                                                                                                                                                            | gi 1515560 | 39,986.50 | 100.00% | 4 | 7 | 9     | 0.10%  | 9.70%                                 | FGFYEV 2.08<br>FK           | 1,036.51 |
| ATP | 6011 | SLC25A 3 protein 64                                                                                                                                                                                                                                            | gi 1515560 | 39,986.50 | 100.00% | 4 | 7 | 9     | 0.10%  | 9.70%                                 | IQTQPGY 3.81<br>ANTLR       | 1,361.72 |
| ATP | 6011 | SLC25A 3 protein 64                                                                                                                                                                                                                                            | gi 1515560 | 39,986.50 | 100.00% | 4 | 7 | 9     | 0.10%  | 9.70%                                 | LPRPPPP 4.07<br>EMPESL<br>K | 1,603.85 |

|     |      |                                                                                                                        |                                      |            |         |   |   |   |       |        |                                   |      |          |
|-----|------|------------------------------------------------------------------------------------------------------------------------|--------------------------------------|------------|---------|---|---|---|-------|--------|-----------------------------------|------|----------|
| ATP | 6011 | SLC25A3 protein                                                                                                        | gi 151556064                         | 39,986.50  | 100.00% | 4 | 7 | 9 | 0.10% | 9.70%  | LPRPPPP<br>EMPESEL<br>KK          | 4.34 | 1,731.95 |
| ATP | 6011 | PREDICTED: similar to Desmoplakin (DP) (250/210 kDa paraneoplastic pemphigus antigen) isoform 1                        | gi 119915951                         | 332,372.60 | 99.80%  | 2 | 2 | 2 | 0.02% | 1.04%  | AQQIHS<br>QTSQQY<br>PLYDLD<br>LGK | 3.31 | 2,433.20 |
| ATP | 6011 | PREDICTED: similar to Desmoplakin (DP) (250/210 kDa paraneoplastic pemphigus antigen) isoform 1                        | gi 119915951                         | 332,372.60 | 99.80%  | 2 | 2 | 2 | 0.02% | 1.04%  | IEVLEEE<br>LR                     | 2.5  | 1,129.61 |
| ATP | 6011 | ALCAM/CD166                                                                                                            | gi 13111304,gi 41386784,gi 47605539  | 64,749.10  | 100.00% | 2 | 2 | 2 | 0.02% | 4.63%  | KSVQYD<br>DVPEYK<br>DR            | 2.26 | 1,741.84 |
| ATP | 6011 | ALCAM/CD166                                                                                                            | gi 13111304,gi 41386784,gi 47605539  | 64,749.10  | 100.00% | 2 | 2 | 2 | 0.02% | 4.63%  | VFKQPS<br>KPEIVSK                 | 2.84 | 1,486.86 |
| ATP | 6011 | RecName: Full=40S ribosomal protein SA; AltName: Full=Laminin receptor 1; AltName: Full=p40; AltName: Full=Protein C10 | gi 122066007,gi 28189773,gi 73587277 | 18,591.70  | 99.90%  | 2 | 2 | 2 | 0.02% | 17.50% | AIVAIEN<br>PADVSVI<br>SSR         | 3.86 | 1,740.95 |

|     |      |                                                                                                                                                                                                                                                           |           |         |   |   |   |       |        |                                                    |          |
|-----|------|-----------------------------------------------------------------------------------------------------------------------------------------------------------------------------------------------------------------------------------------------------------|-----------|---------|---|---|---|-------|--------|----------------------------------------------------|----------|
| ATP | 6011 | RecName gi 1220660<br>: 07.gi 28189<br>Full=40S 773.gi 7358<br>ribosomal 7277<br>protein<br>SA;<br>AltName:<br>Full=Lam<br>inin<br>receptor<br>1;<br>AltName:<br>Full=p40;<br>AltName:<br>Full=Prot<br>ein C10                                            | 18,591.70 | 99.90%  | 2 | 2 | 2 | 0.02% | 17.50% | FAAATG 4.67<br>ATPIAGR                             | 1,203.65 |
| ATP | 6011 | tyrosine 3-gi 2780736<br>monooxy 7.gi 455790<br>genase/tr 8.gi 455791<br>yptophan 3.gi 455791<br>5- 4.gi 455791<br>monooxy 5.gi 455791<br>genase 6.gi 493027<br>activation 3.gi 493027<br>protein, 4.gi 520008<br>zeta 86.gi 73587<br>polypepti 275<br>de | 27,727.90 | 100.00% | 3 | 4 | 5 | 0.05% | 24.10% | LAEQAE 3.89<br>RYDDM<br>AACMK                      | 1,860.79 |
| ATP | 6011 | tyrosine 3-gi 2780736<br>monooxy 7.gi 455790<br>genase/tr 8.gi 455791<br>yptophan 3.gi 455791<br>5- 4.gi 455791<br>monooxy 5.gi 455791<br>genase 6.gi 493027<br>activation 3.gi 493027<br>protein, 4.gi 520008<br>zeta 86.gi 73587<br>polypepti 275<br>de | 27,727.90 | 100.00% | 3 | 4 | 5 | 0.05% | 24.10% | SVTEQG 5.27<br>AELSNE<br>ER                        | 1,548.71 |
| ATP | 6011 | tyrosine 3-gi 2780736<br>monooxy 7.gi 455790<br>genase/tr 8.gi 455791<br>yptophan 3.gi 455791<br>5- 4.gi 455791<br>monooxy 5.gi 455791<br>genase 6.gi 493027<br>activation 3.gi 493027<br>protein, 4.gi 520008<br>zeta 86.gi 73587<br>polypepti 275<br>de | 27,727.90 | 100.00% | 3 | 4 | 5 | 0.05% | 24.10% | TAFDEAI 4.67<br>AELDTL<br>SEESYK<br>DSTLIM<br>QLLR | 3,318.63 |
| ATP | 6011 | PREDIC gi 1199199<br>TED: 84.gi 61553<br>similar to 181.gi 6246<br>ribosomal 0552.gi 716<br>protein 49267<br>L7                                                                                                                                           | 29,053.70 | 100.00% | 3 | 3 | 3 | 0.03% | 16.10% | IALTDNA 3.29<br>LIAR                               | 1,170.68 |

|     |      |                                                |                                                                                     |           |         |   |   |    |       |        |                                 |      |          |
|-----|------|------------------------------------------------|-------------------------------------------------------------------------------------|-----------|---------|---|---|----|-------|--------|---------------------------------|------|----------|
| ATP | 6011 | PREDIC TED: similar to ribosomal protein L7    | gi 1199199<br>84.gi 61553<br>181.gi 6246<br>0552.gi 716<br>49267                    | 29,053.70 | 100.00% | 3 | 3 | 3  | 0.03% | 16.10% | KVPAVP<br>ETLK                  | 2.36 | 1,081.66 |
| ATP | 6011 | PREDIC TED: similar to ribosomal protein L7    | gi 1199199<br>84.gi 61553<br>181.gi 6246<br>0552.gi 716<br>49267                    | 29,053.70 | 100.00% | 3 | 3 | 3  | 0.03% | 16.10% | TTHFVE<br>GGDAGN<br>REDQIN<br>R | 2.48 | 2,115.98 |
| ATP | 6011 | 90-kDa heat shock protein alpha                | gi 3439234<br>3.gi 605927<br>92.gi 75072<br>500                                     | 84,716.20 | 100.00% | 4 | 4 | 4  | 0.04% | 13.60% | ADLINNL<br>GTIAK                | 2.9  | 1,242.71 |
| ATP | 6011 | 90-kDa heat shock protein alpha                | gi 3439234<br>3.gi 605927<br>92.gi 75072<br>500                                     | 84,716.20 | 100.00% | 4 | 4 | 4  | 0.04% | 13.60% | GVVDSE<br>DLPLNIS<br>R          | 4.86 | 1,513.79 |
| ATP | 6011 | 90-kDa heat shock protein alpha                | gi 3439234<br>3.gi 605927<br>92.gi 75072<br>500                                     | 84,716.20 | 100.00% | 4 | 4 | 4  | 0.04% | 13.60% | HLEINPD<br>HSIITL<br>R          | 2.66 | 1,786.94 |
| ATP | 6011 | 90-kDa heat shock protein alpha                | gi 3439234<br>3.gi 605927<br>92.gi 75072<br>500                                     | 84,716.20 | 100.00% | 4 | 4 | 4  | 0.04% | 13.60% | HSQFIGY<br>PITLFVE<br>KER       | 3.03 | 2,064.09 |
| ATP | 6011 | 90-kDa heat shock protein alpha                | gi 3439234<br>3.gi 605927<br>92.gi 75072<br>500                                     | 84,716.20 | 100.00% | 4 | 4 | 4  | 0.04% | 13.60% | NPDDITN<br>EEYGEF<br>YK         | 3.93 | 1,833.78 |
| ATP | 6011 | 90-kDa heat shock protein alpha                | gi 3439234<br>3.gi 605927<br>92.gi 75072<br>500                                     | 84,716.20 | 100.00% | 4 | 4 | 4  | 0.04% | 13.60% | TLTIVDT<br>GIGMTK               | 4.55 | 1,365.73 |
| ATP | 6011 | 90-kDa heat shock protein alpha                | gi 3439234<br>3.gi 605927<br>92.gi 75072<br>500                                     | 84,716.20 | 100.00% | 4 | 4 | 4  | 0.04% | 13.60% | YESLTD<br>PSKLDS<br>GK          | 2.97 | 1,539.75 |
| ATP | 6011 | PREDIC TED: similar to histone cluster 1, H2bd | gi 1199157<br>07.gi 11991<br>5717.gi 119<br>915727.gi 1<br>19936491.g<br>i 82697375 | 13,888.60 | 100.00% | 3 | 3 | 10 | 0.11% | 19.80% | AMGIMN<br>SFVNDIF<br>ER         | 4.34 | 1,759.81 |
| ATP | 6011 | PREDIC TED: similar to histone cluster 1, H2bd | gi 1199157<br>07.gi 11991<br>5717.gi 119<br>915727.gi 1<br>19936491.g<br>i 82697375 | 13,888.60 | 100.00% | 3 | 3 | 10 | 0.11% | 19.80% | ESYSVY<br>VYK                   | 2.11 | 1,137.55 |
| ATP | 6011 | PREDIC TED: similar to histone cluster 1, H2bd | gi 1199157<br>07.gi 11991<br>5717.gi 119<br>915727.gi 1<br>19936491.g<br>i 82697375 | 13,888.60 | 100.00% | 3 | 3 | 10 | 0.11% | 19.80% | KESYSV<br>YVYK                  | 3.32 | 1,265.64 |

|     |      |                                                                                         |                                       |           |         |   |    |    |       |        |                                          |          |
|-----|------|-----------------------------------------------------------------------------------------|---------------------------------------|-----------|---------|---|----|----|-------|--------|------------------------------------------|----------|
| ATP | 6011 | pyruvate kinase 3                                                                       | gi 146231736,gi 194670470,gi 73587283 | 61,410.20 | 100.00% | 5 | 5  | 5  | 0.05% | 13.30% | EATESFA 2.33<br>SDPILYR<br>PVAVAL<br>DTK | 2,493.29 |
| ATP | 6011 | pyruvate kinase 3                                                                       | gi 146231736,gi 194670470,gi 73587283 | 61,410.20 | 100.00% | 5 | 5  | 5  | 0.05% | 13.30% | GDLGIEI 3.03<br>PAEK                     | 1,141.61 |
| ATP | 6011 | pyruvate kinase 3                                                                       | gi 146231736,gi 194670470,gi 73587283 | 61,410.20 | 100.00% | 5 | 5  | 5  | 0.05% | 13.30% | GVNLPG 3.34<br>AAVDLP<br>AVSEK           | 1,636.89 |
| ATP | 6011 | pyruvate kinase 3                                                                       | gi 146231736,gi 194670470,gi 73587283 | 61,410.20 | 100.00% | 5 | 5  | 5  | 0.05% | 13.30% | IYVDDG 3.58<br>LISLLVK                   | 1,447.84 |
| ATP | 6011 | pyruvate kinase 3                                                                       | gi 146231736,gi 194670470,gi 73587283 | 61,410.20 | 100.00% | 5 | 5  | 5  | 0.05% | 13.30% | LDIDSPPI 3.1<br>TAR                      | 1,197.65 |
| ATP | 6011 | guanine nucleotide binding protein (G protein), alpha inhibiting activity polypeptide 2 | gi 198282135                          | 40,460.10 | 100.00% | 8 | 10 | 18 | 0.20% | 25.60% | AMGNLQ 4.24<br>IDFADPS<br>R              | 1,550.73 |
| ATP | 6011 | guanine nucleotide binding protein (G protein), alpha inhibiting activity polypeptide 2 | gi 198282135                          | 40,460.10 | 100.00% | 8 | 10 | 18 | 0.20% | 25.60% | AMGNLQ 3.43<br>IDFADPS<br>RADDAR         | 2,078.96 |
| ATP | 6011 | guanine nucleotide binding protein (G protein), alpha inhibiting activity polypeptide 2 | gi 198282135                          | 40,460.10 | 100.00% | 8 | 10 | 18 | 0.20% | 25.60% | AVVYSN 3.95<br>TIQSIMA<br>IVK            | 1,752.96 |
| ATP | 6011 | guanine nucleotide binding protein (G protein), alpha inhibiting activity polypeptide 2 | gi 198282135                          | 40,460.10 | 100.00% | 8 | 10 | 18 | 0.20% | 25.60% | EYQLND 3.3<br>SAAYYL<br>NDLER            | 2,076.95 |

|     |      |                                                                                         |                                                                |           |         |   |    |    |       |        |                                    |      |          |
|-----|------|-----------------------------------------------------------------------------------------|----------------------------------------------------------------|-----------|---------|---|----|----|-------|--------|------------------------------------|------|----------|
| ATP | 6011 | guanine nucleotide binding protein (G protein), alpha inhibiting activity polypeptide 2 | gi 198282135                                                   | 40,460.10 | 100.00% | 8 | 10 | 18 | 0.20% | 25.60% | IAQSDYI<br>PTQQDV<br>LR            | 4.46 | 1,746.90 |
| ATP | 6011 | guanine nucleotide binding protein (G protein), alpha inhibiting activity polypeptide 2 | gi 198282135                                                   | 40,460.10 | 100.00% | 8 | 10 | 18 | 0.20% | 25.60% | LLLLGA<br>GESGK                    | 3.54 | 1,057.63 |
| ATP | 6011 | guanine nucleotide binding protein (G protein), alpha inhibiting activity polypeptide 2 | gi 198282135                                                   | 40,460.10 | 100.00% | 8 | 10 | 18 | 0.20% | 25.60% | SREYQL<br>NDSAAY<br>YLNDLE<br>R    | 5.04 | 2,320.08 |
| ATP | 6011 | guanine nucleotide binding protein (G protein), alpha inhibiting activity polypeptide 2 | gi 198282135                                                   | 40,460.10 | 100.00% | 8 | 10 | 18 | 0.20% | 25.60% | YDEAAS<br>YIQSK                    | 2.76 | 1,274.59 |
| ATP | 6011 | Paraoxonase 2                                                                           | gi 109939919,gi 61553203,gi 61888862,gi 71648804               | 39,404.60 | 100.00% | 2 | 3  | 4  | 0.04% | 7.91%  | LLIGTLY<br>HR                      | 1.72 | 1,085.65 |
| ATP | 6011 | Paraoxonase 2                                                                           | gi 109939919,gi 61553203,gi 61888862,gi 71648804               | 39,404.60 | 100.00% | 2 | 3  | 4  | 0.04% | 7.91%  | VVAEGF<br>DSANGI<br>NISPDKK        | 4.41 | 1,961.00 |
| ATP | 6011 | ILVBL protein                                                                           | gi 151557079,gi 154426224,gi 166233819,gi 59857973,gi 62751470 | 68,205.30 | 99.80%  | 2 | 2  | 2  | 0.02% | 5.85%  | AAQGLG<br>AQGLL<br>SR              | 3.42 | 1,354.78 |
| ATP | 6011 | ILVBL protein                                                                           | gi 151557079,gi 154426224,gi 166233819,gi 59857973,gi 62751470 | 68,205.30 | 99.80%  | 2 | 2  | 2  | 0.02% | 5.85%  | NAQIAQ<br>SPVLLG<br>GAASTL<br>LQNR | 3.81 | 2,335.31 |

|     |      |                                                                                                                                                                                           |                                                                  |           |        |   |   |       |        |                                                |                            |          |          |
|-----|------|-------------------------------------------------------------------------------------------------------------------------------------------------------------------------------------------|------------------------------------------------------------------|-----------|--------|---|---|-------|--------|------------------------------------------------|----------------------------|----------|----------|
| ATP | 6011 | RecName gi 1153117 :<br>84,gi 74354<br>Full=Co 078,gi 7773<br>mplement 6001<br>compone<br>nt 1 Q<br>subcomp<br>onent-<br>binding<br>protein,<br>mitochon<br>drial;<br>Flags:<br>Precursor | 30,588.80                                                        | 99.90%    | 2      | 3 | 4 | 0.04% | 18.00% | AEEQEP<br>ELTSTPN<br>FVVEVT<br>K               | 4.56                       | 2,247.10 |          |
| ATP | 6011 | RecName gi 1153117 :<br>84,gi 74354<br>Full=Co 078,gi 7773<br>mplement 6001<br>compone<br>nt 1 Q<br>subcomp<br>onent-<br>binding<br>protein,<br>mitochon<br>drial;<br>Flags:<br>Precursor | 30,588.80                                                        | 99.90%    | 2      | 3 | 4 | 0.04% | 18.00% | GVDNTF<br>ADELVE<br>LSTALE<br>HQEYISF<br>LEDLK | 5.45                       | 3,425.66 |          |
| ATP | 6011 | Na/K-<br>ATPase<br>beta 1<br>subunit<br>[synthetic<br>construct<br>]                                                                                                                      | gi 2209487<br>6                                                  | 35,156.20 | 99.80% | 2 | 2 | 2     | 0.02%  | 8.88%                                          | AYGENI<br>GYSEKD<br>R      | 3.85     | 1,501.69 |
| ATP | 6011 | Na/K-<br>ATPase<br>beta 1<br>subunit<br>[synthetic<br>construct<br>]                                                                                                                      | gi 2209487<br>6                                                  | 35,156.20 | 99.80% | 2 | 2 | 2     | 0.02%  | 8.88%                                          | VAPPGL<br>TQIPQIQ<br>K     | 3.21     | 1,489.87 |
| ATP | 6011 | vascular<br>cell<br>adhesion<br>molecule-<br>1 7D<br>variant                                                                                                                              | gi 1190751<br>1,gi 119904<br>48,gi 41386                         | 81,381.40 | 99.80% | 2 | 2 | 2     | 0.02%  | 3.25%                                          | LPIDEME<br>FELK            | 2.55     | 1,363.68 |
| ATP | 6011 | vascular<br>cell<br>adhesion<br>molecule-<br>1 7D<br>variant                                                                                                                              | gi 1190751<br>1,gi 119904<br>48,gi 41386                         | 81,381.40 | 99.80% | 2 | 2 | 2     | 0.02%  | 3.25%                                          | QSTQTL<br>YVNVAP<br>R      | 3.42     | 1,476.78 |
| ATP | 6011 | ARF1<br>protein                                                                                                                                                                           | gi 1463273<br>84,gi 28603<br>778,gi 5985<br>8233,gi 627<br>51462 | 20,583.70 | 99.90% | 2 | 2 | 2     | 0.02%  | 16.00%                                         | ILMVGL<br>DAAGK            | 3.41     | 1,103.61 |
| ATP | 6011 | ARF1<br>protein                                                                                                                                                                           | gi 1463273<br>84,gi 28603<br>778,gi 5985<br>8233,gi 627<br>51462 | 20,583.70 | 99.90% | 2 | 2 | 2     | 0.02%  | 16.00%                                         | MLAEDE<br>LRDAVL<br>LVFANK | 4.16     | 2,063.08 |



|     |      |                                                                     |                                                      |            |         |   |   |   |       |        |                                 |      |          |
|-----|------|---------------------------------------------------------------------|------------------------------------------------------|------------|---------|---|---|---|-------|--------|---------------------------------|------|----------|
| ATP | 6011 | Catenin (cadherin-24,gi 1113046 associate d protein), beta 1, 88kDa | gi 1113046-24,gi 115497488,gi 122145603,gi 152941124 | 85,493.00  | 100.00% | 5 | 6 | 9 | 0.10% | 11.40% | GLNTIPL FVQLLY SPIENIQ R        | 3.57 | 2,428.36 |
| ATP | 6011 | Catenin (cadherin-24,gi 1113046 associate d protein), beta 1, 88kDa | gi 1113046-24,gi 115497488,gi 122145603,gi 152941124 | 85,493.00  | 100.00% | 5 | 6 | 9 | 0.10% | 11.40% | HAVVNL INYQDD AELATR            | 3.15 | 2,042.03 |
| ATP | 6011 | Catenin (cadherin-24,gi 1113046 associate d protein), beta 1, 88kDa | gi 1113046-24,gi 115497488,gi 122145603,gi 152941124 | 85,493.00  | 100.00% | 5 | 6 | 9 | 0.10% | 11.40% | LHYGLP VVVK                     | 2.88 | 1,124.68 |
| ATP | 6011 | Catenin (cadherin-24,gi 1113046 associate d protein), beta 1, 88kDa | gi 1113046-24,gi 115497488,gi 122145603,gi 152941124 | 85,493.00  | 100.00% | 5 | 6 | 9 | 0.10% | 11.40% | LLNDED QVVVNK                   | 3.84 | 1,385.73 |
| ATP | 6011 | Catenin (cadherin-24,gi 1113046 associate d protein), beta 1, 88kDa | gi 1113046-24,gi 115497488,gi 122145603,gi 152941124 | 85,493.00  | 100.00% | 5 | 6 | 9 | 0.10% | 11.40% | MLGSPV DSVLFY AITLHN LLLHQE GAK | 3.62 | 3,083.62 |
| ATP | 6011 | PREDICTED: collagen, type XII, alpha 1 isoform 1                    | gi 194669778                                         | 351,243.80 | 100.00% | 3 | 3 | 3 | 0.03% | 1.58%  | GPGDLE APSNLV LSER              | 3.63 | 1,653.84 |
| ATP | 6011 | PREDICTED: collagen, type XII, alpha 1 isoform 1                    | gi 194669778                                         | 351,243.80 | 100.00% | 3 | 3 | 3 | 0.03% | 1.58%  | ITYQPST GEGNEQ TTTIGGR          | 4.43 | 2,110.01 |
| ATP | 6011 | PREDICTED: collagen, type XII, alpha 1 isoform 1                    | gi 194669778                                         | 351,243.80 | 100.00% | 3 | 3 | 3 | 0.03% | 1.58%  | NNVILQP LQPDP YK                | 3.37 | 1,739.93 |
| ATP | 6011 | V-ras simian leukemia viral oncogene homolog A (ras related)        | gi 73586513,gi 77736231,gi 95768203                  | 23,522.20  | 100.00% | 2 | 4 | 5 | 0.05% | 13.10% | ANVDKV FFDLMR                   | 4.53 | 1,470.74 |

|     |      |                                                                                                                    |                                                                                                                                                          |           |         |   |   |   |       |        |                                         |          |
|-----|------|--------------------------------------------------------------------------------------------------------------------|----------------------------------------------------------------------------------------------------------------------------------------------------------|-----------|---------|---|---|---|-------|--------|-----------------------------------------|----------|
| ATP | 6011 | V-ral<br>simian<br>leukemia<br>viral<br>oncogene<br>homolog<br>A (ras<br>related)                                  | gi 7358651<br>3,gi 777362<br>31,gi 95768<br>203                                                                                                          | 23,522.20 | 100.00% | 2 | 4 | 5 | 0.05% | 13.10% | VKEDEN 3.47<br>VPFLLV<br>GNK            | 1,700.92 |
| ATP | 6011 | hemoglob<br>in alpha<br>chain                                                                                      | gi 1168129<br>02,gi 12671<br>7493,gi 136<br>34094,gi 19<br>4678485,gi <br>197724899,<br>gi 1977249<br>01,gi 19772<br>4903,gi 600<br>6421,gi 742<br>68120 | 15,035.40 | 99.80%  | 2 | 2 | 2 | 0.02% | 22.00% | AVEHLD 3.12<br>DLPGAL<br>SELSDLH<br>AHK | 2,367.19 |
| ATP | 6011 | hemoglob<br>in alpha<br>chain                                                                                      | gi 1168129<br>02,gi 12671<br>7493,gi 136<br>34094,gi 19<br>4678485,gi <br>197724899,<br>gi 1977249<br>01,gi 19772<br>4903,gi 600<br>6421,gi 742<br>68120 | 15,035.40 | 99.80%  | 2 | 2 | 2 | 0.02% | 22.00% | MFLSFPT 2.4<br>TK                       | 1,087.55 |
| ATP | 6011 | RecName<br>:<br>Full=Tra<br>nsmembr<br>ane<br>emp24<br>domain-<br>containin<br>g protein<br>1; Flags:<br>Precursor | gi 1141522<br>89,gi 83638<br>714,gi 8437<br>0158                                                                                                         | 25,119.90 | 99.80%  | 2 | 2 | 3 | 0.03% | 11.50% | KADGVH 4.42<br>TVEPTE<br>AGDYK          | 1,816.87 |
| ATP | 6011 | RecName<br>:<br>Full=Tra<br>nsmembr<br>ane<br>emp24<br>domain-<br>containin<br>g protein<br>1; Flags:<br>Precursor | gi 1141522<br>89,gi 83638<br>714,gi 8437<br>0158                                                                                                         | 25,119.90 | 99.80%  | 2 | 2 | 3 | 0.03% | 11.50% | SIQVLTL 3.07<br>LR                      | 1,042.66 |
| ATP | 6011 | growth<br>and<br>transform<br>ation-<br>dependen<br>t protein                                                      | gi 1140515<br>22,gi 12625<br>8169,gi 842<br>01630                                                                                                        | 17,719.20 | 100.00% | 3 | 3 | 3 | 0.03% | 20.50% | FKKEDEI 5.31<br>PETVSFE<br>MLDAAK       | 2,343.14 |
| ATP | 6011 | growth<br>and<br>transform<br>ation-<br>dependen<br>t protein                                                      | gi 1140515<br>22,gi 12625<br>8169,gi 842<br>01630                                                                                                        | 17,719.20 | 100.00% | 3 | 3 | 3 | 0.03% | 20.50% | NETLTSL 2.82<br>NLEK                    | 1,261.66 |

|     |      |                                                            |                                       |           |         |    |    |    |       |        |                                 |      |          |
|-----|------|------------------------------------------------------------|---------------------------------------|-----------|---------|----|----|----|-------|--------|---------------------------------|------|----------|
| ATP | 6011 | growth and transformation-dependent protein                | gi 114051522,gi 126258169,gi 84201630 | 17,719.20 | 100.00% | 3  | 3  | 3  | 0.03% | 20.50% | RNETLT<br>SLNLEK                | 3.9  | 1,417.76 |
| ATP | 6011 | NADH:ubiquinone oxidoreductase ASH1 subunit [Homo sapiens] | gi 33150722                           | 21,747.60 | 100.00% | 3  | 3  | 3  | 0.03% | 24.70% | QYPYNN<br>LYLER                 | 2.28 | 1,472.72 |
| ATP | 6011 | NADH:ubiquinone oxidoreductase ASH1 subunit [Homo sapiens] | gi 33150722                           | 21,747.60 | 100.00% | 3  | 3  | 3  | 0.03% | 24.70% | TASHMT<br>KDMFPG<br>PYPR        | 2.82 | 1,835.86 |
| ATP | 6011 | NADH:ubiquinone oxidoreductase ASH1 subunit [Homo sapiens] | gi 33150722                           | 21,747.60 | 100.00% | 3  | 3  | 3  | 0.03% | 24.70% | VEDYEP<br>YPDDGM<br>GYGDYP<br>K | 3.2  | 2,225.89 |
| ATP | 6011 | polymerase I and transcript release factor isoform 2       | gi 162287374                          | 43,446.30 | 100.00% | 13 | 17 | 33 | 0.36% | 27.20% | IIGAVDQ<br>IQLTQA<br>QLEER      | 4.65 | 2,025.10 |
| ATP | 6011 | polymerase I and transcript release factor isoform 2       | gi 162287374                          | 43,446.30 | 100.00% | 13 | 17 | 33 | 0.36% | 27.20% | IREGQVE<br>VLK                  | 3.66 | 1,170.68 |
| ATP | 6011 | polymerase I and transcript release factor isoform 2       | gi 162287374                          | 43,446.30 | 100.00% | 13 | 17 | 33 | 0.36% | 27.20% | KLEVNE<br>AELLR                 | 4.41 | 1,313.74 |
| ATP | 6011 | polymerase I and transcript release factor isoform 2       | gi 162287374                          | 43,446.30 | 100.00% | 13 | 17 | 33 | 0.36% | 27.20% | KLEVNE<br>AELLRR                | 2.21 | 1,469.84 |
| ATP | 6011 | polymerase I and transcript release factor isoform 2       | gi 162287374                          | 43,446.30 | 100.00% | 13 | 17 | 33 | 0.36% | 27.20% | KSFTPD<br>HVYAR                 | 2.83 | 1,419.74 |
| ATP | 6011 | polymerase I and transcript release factor isoform 2       | gi 162287374                          | 43,446.30 | 100.00% | 13 | 17 | 33 | 0.36% | 27.20% | LEVNEA<br>ELLR                  | 3.79 | 1,185.65 |

|     |      |                                                      |                                                                                              |           |         |    |    |    |       |        |                                                            |          |
|-----|------|------------------------------------------------------|----------------------------------------------------------------------------------------------|-----------|---------|----|----|----|-------|--------|------------------------------------------------------------|----------|
| ATP | 6011 | polymerase I and transcript release factor isoform 2 | gi 162287374                                                                                 | 43,446.30 | 100.00% | 13 | 17 | 33 | 0.36% | 27.20% | QAEMEG 4.3<br>AVQSIQ<br>GELSK                              | 1,820.87 |
| ATP | 6011 | polymerase I and transcript release factor isoform 2 | gi 162287374                                                                                 | 43,446.30 | 100.00% | 13 | 17 | 33 | 0.36% | 27.20% | SDQVNG 3.17<br>VLVLSLL<br>DK                               | 1,599.90 |
| ATP | 6011 | polymerase I and transcript release factor isoform 2 | gi 162287374                                                                                 | 43,446.30 | 100.00% | 13 | 17 | 33 | 0.36% | 27.20% | SDQVNG 4.14<br>VLVLSLL<br>DKIIGAV<br>DQIQLT<br>QAQLEE<br>R | 3,605.98 |
| ATP | 6011 | polymerase I and transcript release factor isoform 2 | gi 162287374                                                                                 | 43,446.30 | 100.00% | 13 | 17 | 33 | 0.36% | 27.20% | SFTPDH 2.49<br>VVYAR                                       | 1,291.64 |
| ATP | 6011 | polymerase I and transcript release factor isoform 2 | gi 162287374                                                                                 | 43,446.30 | 100.00% | 13 | 17 | 33 | 0.36% | 27.20% | VMIYQD 2.77<br>EVK                                         | 1,140.56 |
| ATP | 6011 | polymerase I and transcript release factor isoform 2 | gi 162287374                                                                                 | 43,446.30 | 100.00% | 13 | 17 | 33 | 0.36% | 27.20% | VMIYQD 3.22<br>EVKLPA<br>K                                 | 1,549.83 |
| ATP | 6011 | polymerase I and transcript release factor isoform 2 | gi 162287374                                                                                 | 43,446.30 | 100.00% | 13 | 17 | 33 | 0.36% | 27.20% | VPPFTFH 2.1<br>VK                                          | 1,071.60 |
| ATP | 6011 | unnamed protein product                              | gi 110292444,gi 1351907,gi 148744077,gi 162648,gi 2190337,gi 23307791,gi 30794280,gi 3336842 | 69,296.20 | 100.00% | 6  | 7  | 10 | 0.11% | 11.40% | FKDLGE 4.41<br>EHFK                                        | 1,249.62 |
| ATP | 6011 | unnamed protein product                              | gi 110292444,gi 1351907,gi 148744077,gi 162648,gi 2190337,gi 23307791,gi 30794280,gi 3336842 | 69,296.20 | 100.00% | 6  | 7  | 10 | 0.11% | 11.40% | HLVDEP 2.68<br>QNLIK                                       | 1,305.72 |

|     |      |                                       |                                                                                              |           |         |    |    |    |       |        |                    |      |          |
|-----|------|---------------------------------------|----------------------------------------------------------------------------------------------|-----------|---------|----|----|----|-------|--------|--------------------|------|----------|
| ATP | 6011 | unnamed protein product               | gi 110292444,gi 1351907,gi 148744077,gi 162648,gi 2190337,gi 23307791,gi 30794280,gi 3336842 | 69,296.20 | 100.00% | 6  | 7  | 10 | 0.11% | 11.40% | KQTALV ELLK        | 3.01 | 1,142.71 |
| ATP | 6011 | unnamed protein product               | gi 110292444,gi 1351907,gi 148744077,gi 162648,gi 2190337,gi 23307791,gi 30794280,gi 3336842 | 69,296.20 | 100.00% | 6  | 7  | 10 | 0.11% | 11.40% | KVPQVS TPTLVE VSR  | 4.56 | 1,639.94 |
| ATP | 6011 | unnamed protein product               | gi 110292444,gi 1351907,gi 148744077,gi 162648,gi 2190337,gi 23307791,gi 30794280,gi 3336842 | 69,296.20 | 100.00% | 6  | 7  | 10 | 0.11% | 11.40% | LGEYGF QNALIV R    | 3.5  | 1,479.80 |
| ATP | 6011 | unnamed protein product               | gi 110292444,gi 1351907,gi 148744077,gi 162648,gi 2190337,gi 23307791,gi 30794280,gi 3336842 | 69,296.20 | 100.00% | 6  | 7  | 10 | 0.11% | 11.40% | LVNELT EFAK        | 3.52 | 1,163.63 |
| ATP | 6011 | B-cell receptor-associated protein 31 | gi 59858303,gi 62460574,gi 74354925                                                          | 27,884.40 | 100.00% | 4  | 7  | 11 | 0.12% | 16.70% | KYMEEN DLLKK       | 4.5  | 1,426.72 |
| ATP | 6011 | B-cell receptor-associated protein 31 | gi 59858303,gi 62460574,gi 74354925                                                          | 27,884.40 | 100.00% | 4  | 7  | 11 | 0.12% | 16.70% | LQAAVD GPSDKK EE   | 2.26 | 1,486.74 |
| ATP | 6011 | B-cell receptor-associated protein 31 | gi 59858303,gi 62460574,gi 74354925                                                          | 27,884.40 | 100.00% | 4  | 7  | 11 | 0.12% | 16.70% | VNLQNN PGAVEH FHMK | 3.67 | 1,850.90 |
| ATP | 6011 | B-cell receptor-associated protein 31 | gi 59858303,gi 62460574,gi 74354925                                                          | 27,884.40 | 100.00% | 4  | 7  | 11 | 0.12% | 16.70% | YMEEND LLKK        | 2.55 | 1,298.63 |
| ATP | 6011 | RecName : Full=Prohibitin-2           | gi 109892820,gi 114051223,gi 87578149                                                        | 33,340.80 | 100.00% | 11 | 14 | 38 | 0.41% | 46.80% | AQVSLLI R          | 2.45 | 899.5673 |
| ATP | 6011 | RecName : Full=Prohibitin-2           | gi 109892820,gi 114051223,gi 87578149                                                        | 33,340.80 | 100.00% | 11 | 14 | 38 | 0.41% | 46.80% | DLQMVN ISLR        | 3.42 | 1,204.64 |

|     |      |                                               |                                                                                  |           |         |    |    |    |       |        |                                          |          |
|-----|------|-----------------------------------------------|----------------------------------------------------------------------------------|-----------|---------|----|----|----|-------|--------|------------------------------------------|----------|
| ATP | 6011 | RecName<br>:<br>Full=Pro<br>hibitin-2         | gi 1098928<br>20,gi 11405<br>1223,gi 875<br>78149                                | 33,340.80 | 100.00% | 11 | 14 | 38 | 0.41% | 46.80% | ESVFTV 3.21<br>EGGHR                     | 1,217.59 |
| ATP | 6011 | RecName<br>:<br>Full=Pro<br>hibitin-2         | gi 1098928<br>20,gi 11405<br>1223,gi 875<br>78149                                | 33,340.80 | 100.00% | 11 | 14 | 38 | 0.41% | 46.80% | FNASQLI 3.97<br>TQR                      | 1,177.63 |
| ATP | 6011 | RecName<br>:<br>Full=Pro<br>hibitin-2         | gi 1098928<br>20,gi 11405<br>1223,gi 875<br>78149                                | 33,340.80 | 100.00% | 11 | 14 | 38 | 0.41% | 46.80% | IGGVQQ 4.83<br>DTILAEG<br>LHFR           | 1,853.99 |
| ATP | 6011 | RecName<br>:<br>Full=Pro<br>hibitin-2         | gi 1098928<br>20,gi 11405<br>1223,gi 875<br>78149                                | 33,340.80 | 100.00% | 11 | 14 | 38 | 0.41% | 46.80% | IPWFQYP 3.26<br>IYDIR                    | 1,723.92 |
| ATP | 6011 | RecName<br>:<br>Full=Pro<br>hibitin-2         | gi 1098928<br>20,gi 11405<br>1223,gi 875<br>78149                                | 33,340.80 | 100.00% | 11 | 14 | 38 | 0.41% | 46.80% | IVQAEG 4.05<br>EAEAAR                    | 1,243.63 |
| ATP | 6011 | RecName<br>:<br>Full=Pro<br>hibitin-2         | gi 1098928<br>20,gi 11405<br>1223,gi 875<br>78149                                | 33,340.80 | 100.00% | 11 | 14 | 38 | 0.41% | 46.80% | IYLTAD 6.12<br>NLVLNL<br>QDESFT<br>R     | 2,225.15 |
| ATP | 6011 | RecName<br>:<br>Full=Pro<br>hibitin-2         | gi 1098928<br>20,gi 11405<br>1223,gi 875<br>78149                                | 33,340.80 | 100.00% | 11 | 14 | 38 | 0.41% | 46.80% | LLLGAG 3.45<br>AVAYGI<br>R               | 1,273.76 |
| ATP | 6011 | RecName<br>:<br>Full=Pro<br>hibitin-2         | gi 1098928<br>20,gi 11405<br>1223,gi 875<br>78149                                | 33,340.80 | 100.00% | 11 | 14 | 38 | 0.41% | 46.80% | VLPSIVN 2.99<br>EVLK                     | 1,210.74 |
| ATP | 6011 | RecName<br>:<br>Full=Pro<br>hibitin-2         | gi 1098928<br>20,gi 11405<br>1223,gi 875<br>78149                                | 33,340.80 | 100.00% | 11 | 14 | 38 | 0.41% | 46.80% | VLSRPN 3.47<br>AMELPS<br>MYQR            | 1,907.95 |
| ATP | 6011 | TAP1<br>protein                               | gi 1515570<br>07                                                                 | 81,933.30 | 100.00% | 4  | 5  | 6  | 0.07% | 8.00%  | GVVGAA 3.1<br>LGFR                       | 946.5469 |
| ATP | 6011 | TAP1<br>protein                               | gi 1515570<br>07                                                                 | 81,933.30 | 100.00% | 4  | 5  | 6  | 0.07% | 8.00%  | IFEYLDLDR 2.26                           | 955.4884 |
| ATP | 6011 | TAP1<br>protein                               | gi 1515570<br>07                                                                 | 81,933.30 | 100.00% | 4  | 5  | 6  | 0.07% | 8.00%  | SSQVAIE 3.56<br>VLSAMP<br>TVR            | 1,703.90 |
| ATP | 6011 | TAP1<br>protein                               | gi 1515570<br>07                                                                 | 81,933.30 | 100.00% | 4  | 5  | 6  | 0.07% | 8.00%  | STVAAL 4.58<br>LQNLQ<br>PTEGQV<br>LLDGEP | 2,894.55 |
| ATP | 6011 | PREDIC<br>TED:<br>similar to<br>keratin<br>6A | gi 1946873<br>33,gi 61870<br>938,gi 7661<br>7862,gi 766<br>17868,gi 76<br>689949 | 60,808.20 | 100.00% | 3  | 4  | 5  | 0.05% | 11.60% | AQYEEIA 2.63<br>QR                       | 1,107.54 |
| ATP | 6011 | PREDIC<br>TED:<br>similar to<br>keratin<br>6A | gi 1946873<br>33,gi 61870<br>938,gi 7661<br>7862,gi 766<br>17868,gi 76<br>689949 | 60,808.20 | 100.00% | 3  | 4  | 5  | 0.05% | 11.60% | FASFIDK 2.21                             | 827.4298 |
| ATP | 6011 | PREDIC<br>TED:<br>similar to<br>keratin<br>6A | gi 1946873<br>33,gi 61870<br>938,gi 7661<br>7862,gi 766<br>17868,gi 76<br>689949 | 60,808.20 | 100.00% | 3  | 4  | 5  | 0.05% | 11.60% | FASFIDK 1.68<br>VR                       | 1,082.60 |

|     |      |                                                                                                                                                                                                                  |                                                              |           |         |    |    |    |       |        |                                          |          |
|-----|------|------------------------------------------------------------------------------------------------------------------------------------------------------------------------------------------------------------------|--------------------------------------------------------------|-----------|---------|----|----|----|-------|--------|------------------------------------------|----------|
| ATP | 6011 | PREDIC TED: similar to keratin 6A                                                                                                                                                                                | gi 194687333,gi 61870938,gi 76617862,gi 76617868,gi 76689949 | 60,808.20 | 100.00% | 3  | 4  | 5  | 0.05% | 11.60% | LALDVEI 3.01<br>ATYR                     | 1,263.69 |
| ATP | 6011 | PREDIC TED: similar to keratin 6A                                                                                                                                                                                | gi 194687333,gi 61870938,gi 76617862,gi 76617868,gi 76689949 | 60,808.20 | 100.00% | 3  | 4  | 5  | 0.05% | 11.60% | NKYEDE 3.37<br>INKR                      | 1,308.65 |
| ATP | 6011 | PREDIC TED: similar to keratin 6A                                                                                                                                                                                | gi 194687333,gi 61870938,gi 76617862,gi 76617868,gi 76689949 | 60,808.20 | 100.00% | 3  | 4  | 5  | 0.05% | 11.60% | NLDLDSI 4.82<br>IAEVK                    | 1,329.73 |
| ATP | 6011 | PREDIC TED: similar to keratin 6A                                                                                                                                                                                | gi 194687333,gi 61870938,gi 76617862,gi 76617868,gi 76689949 | 60,808.20 | 100.00% | 3  | 4  | 5  | 0.05% | 11.60% | QNLEPLF 3.73<br>EQYINN<br>LR             | 1,890.97 |
| ATP | 6011 | MOSPD2 protein                                                                                                                                                                                                   | gi 151556011,gi 155369632,gi 156120441                       | 56,360.50 | 99.80%  | 2  | 2  | 2  | 0.02% | 7.52%  | EMAVND 2.74<br>LTEASIP<br>R              | 1,561.75 |
| ATP | 6011 | MOSPD2 protein                                                                                                                                                                                                   | gi 151556011,gi 155369632,gi 156120441                       | 56,360.50 | 99.80%  | 2  | 2  | 2  | 0.02% | 7.52%  | GPLLHIS 3.42<br>PAEELYF<br>GSTDSG<br>EKK | 2,475.24 |
| ATP | 6011 | RecName : Full=Ann exin A2; AltName: Full=Ann 2 exin-2; AltName: Full=Ann exin II; AltName: Full=Lipocortin II; AltName: Full=Calpactin I heavy chain; AltName: Full=Chromobindin-8; AltName: Full=p36; AltName: | gi 113948,gi 162779,gi 27807289,gi 59858385,gi 7358698       | 38,523.90 | 100.00% | 10 | 12 | 14 | 0.15% | 34.20% | AEDGSVI 3.96<br>DYELID<br>QDAR           | 1,908.88 |

|     |      |                                                                                                                                                                                                                                                                                                                                                           |           |         |    |    |    |       |        |                                |          |
|-----|------|-----------------------------------------------------------------------------------------------------------------------------------------------------------------------------------------------------------------------------------------------------------------------------------------------------------------------------------------------------------|-----------|---------|----|----|----|-------|--------|--------------------------------|----------|
| ATP | 6011 | RecName gi 113948,g<br>: i 162779,g <br>Full=Ann 27807289,g<br>exin A2; i 59858385,<br>AltName: gi 7358698<br>Full=Ann 2<br>exin-2;<br>AltName:<br>Full=Ann<br>exin II;<br>AltName:<br>Full=Lip<br>ocortin<br>II;<br>AltName:<br>Full=Cal<br>pactin I<br>heavy<br>chain;<br>AltName:<br>Full=Chr<br>omobindi<br>n-8;<br>AltName:<br>Full=p36;<br>AltName: | 38,523.90 | 100.00% | 10 | 12 | 14 | 0.15% | 34.20% | GVDEVT 3.77<br>IVNLTN<br>R     | 1,542.85 |
| ATP | 6011 | RecName gi 113948,g<br>: i 162779,g <br>Full=Ann 27807289,g<br>exin A2; i 59858385,<br>AltName: gi 7358698<br>Full=Ann 2<br>exin-2;<br>AltName:<br>Full=Ann<br>exin II;<br>AltName:<br>Full=Lip<br>ocortin<br>II;<br>AltName:<br>Full=Cal<br>pactin I<br>heavy<br>chain;<br>AltName:<br>Full=Chr<br>omobindi<br>n-8;<br>AltName:<br>Full=p36;<br>AltName: | 38,523.90 | 100.00% | 10 | 12 | 14 | 0.15% | 34.20% | LSLEGD 5.6<br>HSTPPSA<br>YGSVK | 1,844.90 |



|     |      |                                                                                                                                                                                                                                                                                                                                                           |           |         |    |    |    |       |        |                            |      |          |
|-----|------|-----------------------------------------------------------------------------------------------------------------------------------------------------------------------------------------------------------------------------------------------------------------------------------------------------------------------------------------------------------|-----------|---------|----|----|----|-------|--------|----------------------------|------|----------|
| ATP | 6011 | RecName gi 113948,g<br>: i 162779,g <br>Full=Ann 27807289,g<br>exin A2; i 59858385,<br>AltName: gi 7358698<br>Full=Ann 2<br>exin-2;<br>AltName:<br>Full=Ann<br>exin II;<br>AltName:<br>Full=Lip<br>ocortin<br>II;<br>AltName:<br>Full=Cal<br>pactin I<br>heavy<br>chain;<br>AltName:<br>Full=Chr<br>omobindi<br>n-8;<br>AltName:<br>Full=p36;<br>AltName: | 38,523.90 | 100.00% | 10 | 12 | 14 | 0.15% | 34.20% | QDIAFA<br>YQR              | 2.68 | 1,111.55 |
| ATP | 6011 | RecName gi 113948,g<br>: i 162779,g <br>Full=Ann 27807289,g<br>exin A2; i 59858385,<br>AltName: gi 7358698<br>Full=Ann 2<br>exin-2;<br>AltName:<br>Full=Ann<br>exin II;<br>AltName:<br>Full=Lip<br>ocortin<br>II;<br>AltName:<br>Full=Cal<br>pactin I<br>heavy<br>chain;<br>AltName:<br>Full=Chr<br>omobindi<br>n-8;<br>AltName:<br>Full=p36;<br>AltName: | 38,523.90 | 100.00% | 10 | 12 | 14 | 0.15% | 34.20% | RAEDGS<br>VIDYELI<br>DQDAR | 4.94 | 2,064.98 |

|     |      |                                                                                                                                                                                                                                                                                                                                                           |           |         |    |    |    |       |        |                               |          |
|-----|------|-----------------------------------------------------------------------------------------------------------------------------------------------------------------------------------------------------------------------------------------------------------------------------------------------------------------------------------------------------------|-----------|---------|----|----|----|-------|--------|-------------------------------|----------|
| ATP | 6011 | RecName gi 113948,g<br>: i 162779,g <br>Full=Ann 27807289,g<br>exin A2; i 59858385,<br>AltName: gi 7358698<br>Full=Ann 2<br>exin-2;<br>AltName:<br>Full=Ann<br>exin II;<br>AltName:<br>Full=Lip<br>ocortin<br>II;<br>AltName:<br>Full=Cal<br>pactin I<br>heavy<br>chain;<br>AltName:<br>Full=Chr<br>omobindi<br>n-8;<br>AltName:<br>Full=p36;<br>AltName: | 38,523.90 | 100.00% | 10 | 12 | 14 | 0.15% | 34.20% | SALSGH 4.05<br>LETVILG<br>LLK | 1,650.98 |
| ATP | 6011 | RecName gi 113948,g<br>: i 162779,g <br>Full=Ann 27807289,g<br>exin A2; i 59858385,<br>AltName: gi 7358698<br>Full=Ann 2<br>exin-2;<br>AltName:<br>Full=Ann<br>exin II;<br>AltName:<br>Full=Lip<br>ocortin<br>II;<br>AltName:<br>Full=Cal<br>pactin I<br>heavy<br>chain;<br>AltName:<br>Full=Chr<br>omobindi<br>n-8;<br>AltName:<br>Full=p36;<br>AltName: | 38,523.90 | 100.00% | 10 | 12 | 14 | 0.15% | 34.20% | SLYYYIQ 3.32<br>QDTK          | 1,421.69 |

|     |      |                                                                                                                                                                                                                                                                                                                                                           |           |         |    |    |    |       |        |                               |          |
|-----|------|-----------------------------------------------------------------------------------------------------------------------------------------------------------------------------------------------------------------------------------------------------------------------------------------------------------------------------------------------------------|-----------|---------|----|----|----|-------|--------|-------------------------------|----------|
| ATP | 6011 | RecName gi 113948,g<br>: i 162779,g <br>Full=Ann 27807289,g<br>exin A2; i 59858385,<br>AltName: gi 7358698<br>Full=Ann 2<br>exin-2;<br>AltName:<br>Full=Ann<br>exin II;<br>AltName:<br>Full=Lip<br>ocortin<br>II;<br>AltName:<br>Full=Cal<br>pactin I<br>heavy<br>chain;<br>AltName:<br>Full=Chr<br>omobindi<br>n-8;<br>AltName:<br>Full=p36;<br>AltName: | 38,523.90 | 100.00% | 10 | 12 | 14 | 0.15% | 34.20% | SYSPYD 2.59<br>MLESIK<br>K    | 1,576.76 |
| ATP | 6011 | RecName gi 113948,g<br>: i 162779,g <br>Full=Ann 27807289,g<br>exin A2; i 59858385,<br>AltName: gi 7358698<br>Full=Ann 2<br>exin-2;<br>AltName:<br>Full=Ann<br>exin II;<br>AltName:<br>Full=Lip<br>ocortin<br>II;<br>AltName:<br>Full=Cal<br>pactin I<br>heavy<br>chain;<br>AltName:<br>Full=Chr<br>omobindi<br>n-8;<br>AltName:<br>Full=p36;<br>AltName: | 38,523.90 | 100.00% | 10 | 12 | 14 | 0.15% | 34.20% | TDLEKDI 2.64<br>VSDTSG<br>DFR | 1,797.85 |

|     |      |                                                                                                                                                                                                                                                                                                                                                           |           |         |    |    |    |       |        |                                |          |
|-----|------|-----------------------------------------------------------------------------------------------------------------------------------------------------------------------------------------------------------------------------------------------------------------------------------------------------------------------------------------------------------|-----------|---------|----|----|----|-------|--------|--------------------------------|----------|
| ATP | 6011 | RecName gi 113948,g<br>: i 162779,gj<br>Full=Ann 27807289,g<br>exin A2; i 59858385,<br>AltName: gi 7358698<br>Full=Ann 2<br>exin-2;<br>AltName:<br>Full=Ann<br>exin II;<br>AltName:<br>Full=Lip<br>ocortin<br>II;<br>AltName:<br>Full=Cal<br>pactin I<br>heavy<br>chain;<br>AltName:<br>Full=Chr<br>omobindi<br>n-8;<br>AltName:<br>Full=p36;<br>AltName: | 38,523.90 | 100.00% | 10 | 12 | 14 | 0.15% | 34.20% | TDLEKDI 5.94<br>VSDTSG<br>DFRK | 1,925.95 |
| ATP | 6011 | RecName gi 1102830<br>: gi 27806<br>Full=Try 353,gj 7435<br>ptophanyl-4933,gj 825<br>tRNA<br>synthetas<br>e,<br>cytoplas<br>mic;<br>AltName:<br>Full=Try<br>ptophan--<br>tRNA<br>ligase;<br>Short=Tr<br>pRS                                                                                                                                               | 53,712.80 | 100.00% | 4  | 5  | 6  | 0.07% | 13.50% | ELIEVLQ 2.54<br>PLIAEHQ<br>AR  | 1,859.04 |
| ATP | 6011 | RecName gi 1102830<br>: gi 27806<br>Full=Try 353,gj 7435<br>ptophanyl-4933,gj 825<br>tRNA<br>synthetas<br>e,<br>cytoplas<br>mic;<br>AltName:<br>Full=Try<br>ptophan--<br>tRNA<br>ligase;<br>Short=Tr<br>pRS                                                                                                                                               | 53,712.80 | 100.00% | 4  | 5  | 6  | 0.07% | 13.50% | GIDYDK 2.66<br>LIVR            | 1,191.67 |

|     |      |                                                                                                                                                                                                                |            |         |   |   |   |       |        |                                   |      |          |
|-----|------|----------------------------------------------------------------------------------------------------------------------------------------------------------------------------------------------------------------|------------|---------|---|---|---|-------|--------|-----------------------------------|------|----------|
| ATP | 6011 | RecName gi 1102830<br>: 11.gi 27806<br>Full=Try 353.gi 7435<br>ptophanyl:4933.gi 825<br>tRNA<br>synthetas<br>e,<br>cytoplas<br>mic;<br>AltName:<br>Full=Try<br>ptophan--<br>tRNA<br>ligase;<br>Short=Tr<br>pRS | 53,712.80  | 100.00% | 4 | 5 | 6 | 0.07% | 13.50% | ISFPAIQ<br>AAPSFSN<br>SFPQIFR     | 4.17 | 2,325.20 |
| ATP | 6011 | RecName gi 1102830<br>: 11.gi 27806<br>Full=Try 353.gi 7435<br>ptophanyl:4933.gi 825<br>tRNA<br>synthetas<br>e,<br>cytoplas<br>mic;<br>AltName:<br>Full=Try<br>ptophan--<br>tRNA<br>ligase;<br>Short=Tr<br>pRS | 53,712.80  | 100.00% | 4 | 5 | 6 | 0.07% | 13.50% | MSASDP<br>NSSIFLT<br>DTAK         | 4.2  | 1,800.83 |
| ATP | 6011 | PREDIC gi 1198922<br>TED: 65<br>similar to<br>Transme<br>mbrane<br>protein<br>16F                                                                                                                              | 106,290.10 | 99.80%  | 2 | 2 | 2 | 0.02% | 4.28%  | MNDFYI<br>QDRDTF<br>FNPATR        | 3.47 | 2,267.02 |
| ATP | 6011 | PREDIC gi 1198922<br>TED: 65<br>similar to<br>Transme<br>mbrane<br>protein<br>16F                                                                                                                              | 106,290.10 | 99.80%  | 2 | 2 | 2 | 0.02% | 4.28%  | TPEFEEF<br>NGKPDS<br>LYFNDG<br>QR | 4.13 | 2,490.12 |
| ATP | 6011 | VAPB gi 1260107<br>protein 84.gi 12927<br>0105.gi 160<br>210887                                                                                                                                                | 27,140.50  | 100.00% | 4 | 6 | 7 | 0.08% | 16.90% | ALSSSLD<br>DTEVKK                 | 3.93 | 1,392.72 |
| ATP | 6011 | VAPB gi 1260107<br>protein 84.gi 12927<br>0105.gi 160<br>210887                                                                                                                                                | 27,140.50  | 100.00% | 4 | 6 | 7 | 0.08% | 16.90% | FRGPFT<br>DVVTTN<br>LK            | 4.41 | 1,594.86 |
| ATP | 6011 | VAPB gi 1260107<br>protein 84.gi 12927<br>0105.gi 160<br>210887                                                                                                                                                | 27,140.50  | 100.00% | 4 | 6 | 7 | 0.08% | 16.90% | GPFTDV<br>VTTNLK                  | 4.06 | 1,291.69 |
| ATP | 6011 | VAPB gi 1260107<br>protein 84.gi 12927<br>0105.gi 160<br>210887                                                                                                                                                | 27,140.50  | 100.00% | 4 | 6 | 7 | 0.08% | 16.90% | VEQVLS<br>LEPQHE<br>LK            | 5.24 | 1,648.89 |
| ATP | 6011 | moesin gi 1140507<br>15.gi 11858<br>3148.gi 875<br>78169                                                                                                                                                       | 67,959.00  | 100.00% | 5 | 6 | 8 | 0.09% | 16.30% | AQMVQE<br>DLEKTR                  | 2.99 | 1,463.72 |

|     |      |                                                                                                         |                                       |           |         |   |   |    |       |        |                                                   |      |          |
|-----|------|---------------------------------------------------------------------------------------------------------|---------------------------------------|-----------|---------|---|---|----|-------|--------|---------------------------------------------------|------|----------|
| ATP | 6011 | moesin                                                                                                  | gi 114050715,gi 118583148,gi 87578169 | 67,959.00 | 100.00% | 5 | 6 | 8  | 0.09% | 16.30% | FYPEDV<br>SEELIQD<br>ITQR                         | 3.06 | 2,082.00 |
| ATP | 6011 | moesin                                                                                                  | gi 114050715,gi 118583148,gi 87578169 | 67,959.00 | 100.00% | 5 | 6 | 8  | 0.09% | 16.30% | TAMSTP<br>HVAEPA<br>ENEQDE<br>QDENG<br>EASAE<br>R | 6.91 | 3,342.43 |
| ATP | 6011 | moesin                                                                                                  | gi 114050715,gi 118583148,gi 87578169 | 67,959.00 | 100.00% | 5 | 6 | 8  | 0.09% | 16.30% | TQEQLA<br>LEMAEL<br>TAR                           | 3.32 | 1,719.86 |
| ATP | 6011 | moesin                                                                                                  | gi 114050715,gi 118583148,gi 87578169 | 67,959.00 | 100.00% | 5 | 6 | 8  | 0.09% | 16.30% | VTTMDA<br>ELEFAIQ<br>PNTTGK                       | 3.69 | 2,082.01 |
| ATP | 6011 | unnamed protein product [Mus musculus]                                                                  | gi 26331822                           | 79,759.60 | 99.80%  | 2 | 2 | 2  | 0.02% | 7.43%  | KPMVVL<br>GSSALQ<br>R                             | 3.13 | 1,401.79 |
| ATP | 6011 | unnamed protein product [Mus musculus]                                                                  | gi 26331822                           | 79,759.60 | 99.80%  | 2 | 2 | 2  | 0.02% | 7.43%  | NRLEEV<br>SPNLVR                                  | 2.83 | 1,425.78 |
| ATP | 6011 | unnamed protein product [Mus musculus]                                                                  | gi 26331822                           | 79,759.60 | 99.80%  | 2 | 2 | 2  | 0.02% | 7.43%  | PMVVVL<br>SSALQR<br>DDGAAI<br>LVAVSN<br>MVQK      | 2.67 | 2,885.52 |
| ATP | 6011 | unnamed protein product [Mus musculus]                                                                  | gi 26331822                           | 79,759.60 | 99.80%  | 2 | 2 | 2  | 0.02% | 7.43%  | VALIGSP<br>VDLTYR                                 | 3.22 | 1,403.79 |
| ATP | 6011 | PREDICTED: similar to Keratin, type I cytoskeletal 24 (Cytokeratin-24) (Keratin-24) (Type I keratin-24) | gi 194676109                          | 55,111.70 | 100.00% | 3 | 5 | 11 | 0.12% | 5.52%  | KVLDDL<br>TMTR                                    | 2.6  | 1,191.64 |
| ATP | 6011 | PREDICTED: similar to Keratin, type I cytoskeletal 24 (Cytokeratin-24) (Keratin-24) (Type I keratin-24) | gi 194676109                          | 55,111.70 | 100.00% | 3 | 5 | 11 | 0.12% | 5.52%  | SDLEMQ<br>IESLTEE<br>LAYLK                        | 4.51 | 2,112.04 |

|     |      |                                                                                                                |                                                                                    |           |         |   |   |    |       |        |                                               |      |          |
|-----|------|----------------------------------------------------------------------------------------------------------------|------------------------------------------------------------------------------------|-----------|---------|---|---|----|-------|--------|-----------------------------------------------|------|----------|
| ATP | 6011 | PREDIC TED: 09<br>similar to Keratin, type I cytoskeletal 24 (Cytokeratin-24) (Keratin-24) (Type I keratin-24) | gi 194676109                                                                       | 55,111.70 | 100.00% | 3 | 5 | 11 | 0.12% | 5.52%  | SDLEMQ<br>IESLTEE<br>LAYLKK                   | 3.84 | 2,240.14 |
| ATP | 6011 | H2A histone family, member Y                                                                                   | gi 114052404,gi 87578157                                                           | 39,516.80 | 99.80%  | 2 | 3 | 5  | 0.05% | 13.70% | AASADS<br>TTEGTP<br>ADGFTV<br>LSTK            | 4.67 | 2,127.01 |
| ATP | 6011 | H2A histone family, member Y                                                                                   | gi 114052404,gi 87578157                                                           | 39,516.80 | 99.80%  | 2 | 3 | 5  | 0.05% | 13.70% | IGVGAP<br>VYMAA<br>VLEYLT<br>AEILELA<br>GNAAR | 4.21 | 2,991.59 |
| ATP | 6011 | PREDIC TED: 15,gi 119922774<br>transmembrane protein 33 isoform 2                                              | gi 119893815,gi 119922774                                                          | 27,968.00 | 99.80%  | 2 | 2 | 2  | 0.02% | 8.10%  | ALLANA<br>LTSALR                              | 4.03 | 1,213.73 |
| ATP | 6011 | PREDIC TED: 15,gi 119922774<br>transmembrane protein 33 isoform 2                                              | gi 119893815,gi 119922774                                                          | 27,968.00 | 99.80%  | 2 | 2 | 2  | 0.02% | 8.10%  | LPHFQLS<br>R                                  | 2.24 | 997.5578 |
| ATP | 6011 | Chain A, Crystallization And Structure Determination Of Bovine Profilin At 2.0 Angstroms Resolution            | gi 157833536,gi 157878211,gi 576369,gi 59858521,gi 6288870,gi 62751593,gi 73586531 | 15,039.50 | 100.00% | 5 | 7 | 14 | 0.15% | 49.30% | DSLLQD<br>GEFTMD<br>LR                        | 3.95 | 1,655.76 |
| ATP | 6011 | Chain A, Crystallization And Structure Determination Of Bovine Profilin At 2.0 Angstroms Resolution            | gi 157833536,gi 157878211,gi 576369,gi 59858521,gi 6288870,gi 62751593,gi 73586531 | 15,039.50 | 100.00% | 5 | 7 | 14 | 0.15% | 49.30% | SSFFVNG<br>LTLGGQ<br>K                        | 4.88 | 1,454.76 |

|     |      |                                                                                                                   |                                                                         |           |         |   |   |    |       |        |                                                   |          |
|-----|------|-------------------------------------------------------------------------------------------------------------------|-------------------------------------------------------------------------|-----------|---------|---|---|----|-------|--------|---------------------------------------------------|----------|
| ATP | 6011 | Chain A, gi 1578335<br>Crystallization And Structure Determination Of Bovine Profilin At 2.0 Angstroms Resolution | 36,gi 157878211,gi 576369,gi 59858521,gi 628870,gi 62751593,gi 73586531 | 15,039.50 | 100.00% | 5 | 7 | 14 | 0.15% | 49.30% | STGGAP 4.46<br>TFNITVT<br>MTAK                    | 1,712.85 |
| ATP | 6011 | Chain A, gi 1578335<br>Crystallization And Structure Determination Of Bovine Profilin At 2.0 Angstroms Resolution | 36,gi 157878211,gi 576369,gi 59858521,gi 628870,gi 62751593,gi 73586531 | 15,039.50 | 100.00% | 5 | 7 | 14 | 0.15% | 49.30% | TFVNITP 4.9<br>AEVGILV<br>GK                      | 1,657.95 |
| ATP | 6011 | Chain A, gi 1578335<br>Crystallization And Structure Determination Of Bovine Profilin At 2.0 Angstroms Resolution | 36,gi 157878211,gi 576369,gi 59858521,gi 628870,gi 62751593,gi 73586531 | 15,039.50 | 100.00% | 5 | 7 | 14 | 0.15% | 49.30% | TLVLLM 2.38<br>GK                                 | 890.5382 |
| ATP | 6011 | Brain abundant membrane attached signal protein 1                                                                 | gi 115304757,gi 1930063,gi 27807507,gi 6686271                          | 22,992.60 | 99.80%  | 2 | 2 | 4  | 0.04% | 12.80% | AQAPAA 3.49<br>PADEVK<br>PAETPA<br>ANSDQT<br>VAVK | 2,747.38 |
| ATP | 6011 | Brain abundant membrane attached signal protein 1                                                                 | gi 115304757,gi 1930063,gi 27807507,gi 6686271                          | 22,992.60 | 99.80%  | 2 | 2 | 4  | 0.04% | 12.80% | AQAPAA 3.1<br>PADEVK<br>PAETPA<br>ANSDQT<br>VAVKE | 2,876.43 |
| ATP | 6011 | Heme oxygenase (decyclin g) 1                                                                                     | gi 158455152,gi 59858301,gi 62460520,gi 73919958                        | 32,922.40 | 100.00% | 5 | 7 | 9  | 0.10% | 25.60% | ALNLPSS 4.29<br>GGLAF<br>FTFPNIA<br>SATK          | 2,453.27 |
| ATP | 6011 | Heme oxygenase (decyclin g) 1                                                                                     | gi 158455152,gi 59858301,gi 62460520,gi 73919958                        | 32,922.40 | 100.00% | 5 | 7 | 9  | 0.10% | 25.60% | LVMASL 4.47<br>YHIYVA<br>LEEEIER                  | 2,294.17 |



|     |      |                                                                          |                                                  |           |         |   |   |   |       |        |                                                       |      |          |
|-----|------|--------------------------------------------------------------------------|--------------------------------------------------|-----------|---------|---|---|---|-------|--------|-------------------------------------------------------|------|----------|
| ATP | 6011 | Heme oxygenase (decyclin g) 1                                            | gi 158455152,gi 59858301,gi 62460520,gi 73919958 | 32,922.40 | 100.00% | 5 | 7 | 9 | 0.10% | 25.60% | NKENPV<br>YTPLYFP<br>EELHR                            | 6.44 | 2,246.12 |
| ATP | 6011 | Heme oxygenase (decyclin g) 1                                            | gi 158455152,gi 59858301,gi 62460520,gi 73919958 | 32,922.40 | 100.00% | 5 | 7 | 9 | 0.10% | 25.60% | YLGDLG<br>GGQVLLK                                     | 3.41 | 1,249.68 |
| ATP | 6011 | Heme oxygenase (decyclin g) 1                                            | gi 158455152,gi 59858301,gi 62460520,gi 73919958 | 32,922.40 | 100.00% | 5 | 7 | 9 | 0.10% | 25.60% | YLGDLG<br>GGQVLLK<br>K                                | 3.29 | 1,377.77 |
| ATP | 6011 | RecName : Full=Thioredoxin domain-containing protein 4; Flags: Precursor | gi 108861917,gi 74354589,gi 78042524             | 46,819.40 | 100.00% | 5 | 6 | 8 | 0.09% | 25.90% | ALADYI<br>R                                           | 1.85 | 821.4516 |
| ATP | 6011 | RecName : Full=Thioredoxin domain-containing protein 4; Flags: Precursor | gi 108861917,gi 74354589,gi 78042524             | 46,819.40 | 100.00% | 5 | 6 | 8 | 0.09% | 25.90% | FSQMLH<br>PIFEEAS<br>NVIKEE<br>YPNANQ<br>VVFAR        | 4.12 | 3,523.73 |
| ATP | 6011 | RecName : Full=Thioredoxin domain-containing protein 4; Flags: Precursor | gi 108861917,gi 74354589,gi 78042524             | 46,819.40 | 100.00% | 5 | 6 | 8 | 0.09% | 25.90% | HMYVFG<br>DFRDVLI<br>PGK                              | 2.43 | 1,909.96 |
| ATP | 6011 | RecName : Full=Thioredoxin domain-containing protein 4; Flags: Precursor | gi 108861917,gi 74354589,gi 78042524             | 46,819.40 | 100.00% | 5 | 6 | 8 | 0.09% | 25.90% | LHREFH<br>HGPDPT<br>DTAPGE<br>EVQDVA<br>SSPPSS<br>FQK | 2.21 | 3,728.72 |
| ATP | 6011 | RecName : Full=Thioredoxin domain-containing protein 4; Flags: Precursor | gi 108861917,gi 74354589,gi 78042524             | 46,819.40 | 100.00% | 5 | 6 | 8 | 0.09% | 25.90% | SDPIQEL<br>HDLAEIT<br>TPDR                            | 5.17 | 2,050.01 |

|     |      |                                                                                                                                                                                         |                                                                                                                                        |           |         |   |   |    |       |        |                                         |          |
|-----|------|-----------------------------------------------------------------------------------------------------------------------------------------------------------------------------------------|----------------------------------------------------------------------------------------------------------------------------------------|-----------|---------|---|---|----|-------|--------|-----------------------------------------|----------|
| ATP | 6011 | RecName<br>:<br>Full=Mit<br>ochondri<br>al 2-<br>oxoglutar<br>ate/malat<br>e carrier<br>protein;<br>Short=O<br>GCP;<br>AltName:<br>Full=Solu<br>te carrier<br>family 25<br>member<br>11 | gi 126664,g<br>i 14623167<br>6,gi 148744<br>036,gi 1488<br>78065,gi 16<br>3432,gi 163<br>434,gi 2780<br>7211,gi 32,<br>gi 5985797<br>7 | 33,881.70 | 99.80%  | 2 | 2 | 2  | 0.02% | 7.72%  | AVVVNA 3.57<br>AQLASY<br>SQSK           | 1,635.87 |
| ATP | 6011 | RecName<br>:<br>Full=Mit<br>ochondri<br>al 2-<br>oxoglutar<br>ate/malat<br>e carrier<br>protein;<br>Short=O<br>GCP;<br>AltName:<br>Full=Solu<br>te carrier<br>family 25<br>member<br>11 | gi 126664,g<br>i 14623167<br>6,gi 148744<br>036,gi 1488<br>78065,gi 16<br>3432,gi 163<br>434,gi 2780<br>7211,gi 32,<br>gi 5985797<br>7 | 33,881.70 | 99.80%  | 2 | 2 | 2  | 0.02% | 7.72%  | NVFNAL 2.39<br>FR                       | 980.5311 |
| ATP | 6011 | ER lipid<br>raft<br>associate<br>d 2                                                                                                                                                    | gi 1140510<br>93,gi 12213<br>4590,gi 920<br>97476                                                                                      | 37,713.20 | 100.00% | 3 | 3 | 4  | 0.04% | 10.70% | ISEIEDA 3.98<br>AFLAR                   | 1,334.70 |
| ATP | 6011 | ER lipid<br>raft<br>associate<br>d 2                                                                                                                                                    | gi 1140510<br>93,gi 12213<br>4590,gi 920<br>97476                                                                                      | 37,713.20 | 100.00% | 3 | 3 | 4  | 0.04% | 10.70% | SVQTTL 3.12<br>QTDEVK                   | 1,348.70 |
| ATP | 6011 | ER lipid<br>raft<br>associate<br>d 2                                                                                                                                                    | gi 1140510<br>93,gi 12213<br>4590,gi 920<br>97476                                                                                      | 37,713.20 | 100.00% | 3 | 3 | 4  | 0.04% | 10.70% | VAQVAE 2.87<br>ITFGQK                   | 1,290.71 |
| ATP | 6011 | GLI<br>pathogen<br>esis-<br>related 2                                                                                                                                                   | gi 1113070<br>81,gi 11549<br>7826                                                                                                      | 17,191.20 | 100.00% | 3 | 3 | 3  | 0.03% | 31.20% | ASASDG 4.43<br>SSFVVA<br>R              | 1,253.61 |
| ATP | 6011 | GLI<br>pathogen<br>esis-<br>related 2                                                                                                                                                   | gi 1113070<br>81,gi 11549<br>7826                                                                                                      | 17,191.20 | 100.00% | 3 | 3 | 3  | 0.03% | 31.20% | EAQQYS 2.85<br>EALAST<br>R              | 1,453.69 |
| ATP | 6011 | GLI<br>pathogen<br>esis-<br>related 2                                                                                                                                                   | gi 1113070<br>81,gi 11549<br>7826                                                                                                      | 17,191.20 | 100.00% | 3 | 3 | 3  | 0.03% | 31.20% | YFPAGN 1.69<br>VVNQGF<br>FEENVLP<br>PKK | 2,494.28 |
| ATP | 6011 | ATAD3A<br>protein                                                                                                                                                                       | gi 1572788<br>89,gi 15742<br>8048,gi 162<br>416153                                                                                     | 66,090.40 | 100.00% | 8 | 9 | 10 | 0.11% | 16.40% | ITVLEAL 2.8<br>R                        | 914.567  |
| ATP | 6011 | ATAD3A<br>protein                                                                                                                                                                       | gi 1572788<br>89,gi 15742<br>8048,gi 162<br>416153                                                                                     | 66,090.40 | 100.00% | 8 | 9 | 10 | 0.11% | 16.40% | LKEYEA 4.67<br>AVEQLK<br>GDQIR          | 1,990.06 |

|     |      |                                           |                                                 |           |         |   |    |    |       |        |                                    |      |          |
|-----|------|-------------------------------------------|-------------------------------------------------|-----------|---------|---|----|----|-------|--------|------------------------------------|------|----------|
| ATP | 6011 | ATAD3A protein                            | gi 157278889,gi 157428048,gi 162416153          | 66,090.40 | 100.00% | 8 | 9  | 10 | 0.11% | 16.40% | LLSKPQ<br>DALEGV<br>VLSPSLE<br>AR  | 4.52 | 2,222.24 |
| ATP | 6011 | ATAD3A protein                            | gi 157278889,gi 157428048,gi 162416153          | 66,090.40 | 100.00% | 8 | 9  | 10 | 0.11% | 16.40% | MYFDKY<br>VLKPAT<br>EGK            | 2.82 | 1,805.91 |
| ATP | 6011 | ATAD3A protein                            | gi 157278889,gi 157428048,gi 162416153          | 66,090.40 | 100.00% | 8 | 9  | 10 | 0.11% | 16.40% | NVLMYG<br>PPGTGK                   | 3.33 | 1,249.62 |
| ATP | 6011 | ATAD3A protein                            | gi 157278889,gi 157428048,gi 162416153          | 66,090.40 | 100.00% | 8 | 9  | 10 | 0.11% | 16.40% | QQQLLN<br>EENLR                    | 2.3  | 1,384.72 |
| ATP | 6011 | ATAD3A protein                            | gi 157278889,gi 157428048,gi 162416153          | 66,090.40 | 100.00% | 8 | 9  | 10 | 0.11% | 16.40% | RLLSKP<br>QDALEG<br>VVLSPSL<br>EAR | 2.73 | 2,378.34 |
| ATP | 6011 | ATAD3A protein                            | gi 157278889,gi 157428048,gi 162416153          | 66,090.40 | 100.00% | 8 | 9  | 10 | 0.11% | 16.40% | TAGTLF<br>GEGFR                    | 3.3  | 1,155.58 |
| ATP | 6011 | glucose-regulated protein GRP94 precursor | gi 16041057,gi 27807263,gi 33301108,gi 75775556 | 92,411.40 | 100.00% | 8 | 10 | 13 | 0.14% | 11.90% | DISTNYY<br>ASQK                    | 2.64 | 1,289.60 |
| ATP | 6011 | glucose-regulated protein GRP94 precursor | gi 16041057,gi 27807263,gi 33301108,gi 75775556 | 92,411.40 | 100.00% | 8 | 10 | 13 | 0.14% | 11.90% | ELISNAS<br>DALDKI<br>R             | 3.6  | 1,544.83 |
| ATP | 6011 | glucose-regulated protein GRP94 precursor | gi 16041057,gi 27807263,gi 33301108,gi 75775556 | 92,411.40 | 100.00% | 8 | 10 | 13 | 0.14% | 11.90% | FQSSHH<br>PSDMTS<br>LDQYVE<br>R    | 5.17 | 2,280.00 |
| ATP | 6011 | glucose-regulated protein GRP94 precursor | gi 16041057,gi 27807263,gi 33301108,gi 75775556 | 92,411.40 | 100.00% | 8 | 10 | 13 | 0.14% | 11.90% | GVVDS<br>DLPLNV<br>SR              | 4.99 | 1,485.75 |
| ATP | 6011 | glucose-regulated protein GRP94 precursor | gi 16041057,gi 27807263,gi 33301108,gi 75775556 | 92,411.40 | 100.00% | 8 | 10 | 13 | 0.14% | 11.90% | LIINSLY<br>K                       | 2.73 | 963.5874 |
| ATP | 6011 | glucose-regulated protein GRP94 precursor | gi 16041057,gi 27807263,gi 33301108,gi 75775556 | 92,411.40 | 100.00% | 8 | 10 | 13 | 0.14% | 11.90% | NLLHVT<br>DTGVG<br>MTR             | 4.18 | 1,529.77 |
| ATP | 6011 | glucose-regulated protein GRP94 precursor | gi 16041057,gi 27807263,gi 33301108,gi 75775556 | 92,411.40 | 100.00% | 8 | 10 | 13 | 0.14% | 11.90% | NLLHVT<br>DTGVG<br>MTREEL<br>VK    | 3.35 | 2,128.11 |

|     |      |                                                                                  |                                                 |            |         |   |    |    |       |        |                      |      |          |
|-----|------|----------------------------------------------------------------------------------|-------------------------------------------------|------------|---------|---|----|----|-------|--------|----------------------|------|----------|
| ATP | 6011 | glucose-regulated protein GRP94 precursor                                        | gi 16041057,gi 27807263,gi 33301108,gi 75775556 | 92,411.40  | 100.00% | 8 | 10 | 13 | 0.14% | 11.90% | SILFVPT SAPR         | 3.07 | 1,187.68 |
| ATP | 6011 | PREDICTED: similar to FXFD domain-containing ion transport regulator 5 isoform 1 | gi 76641186                                     | 18,921.80  | 99.80%  | 2 | 2  | 2  | 0.02% | 10.40% | EDDPFF YDETLR        | 3.54 | 1,661.70 |
| ATP | 6011 | PREDICTED: similar to FXFD domain-containing ion transport regulator 5 isoform 1 | gi 76641186                                     | 18,921.80  | 99.80%  | 2 | 2  | 2  | 0.02% | 10.40% | QPGSKE DDPFFY DEDTLR | 3.22 | 2,158.96 |
| ATP | 6011 | PREDICTED: similar to catenin, delta 1                                           | gi 194673532                                    | 106,846.20 | 100.00% | 8 | 9  | 11 | 0.12% | 9.90%  | ALSAIAD LLTNEHER     | 3.45 | 1,652.86 |
| ATP | 6011 | PREDICTED: similar to catenin, delta 1                                           | gi 194673532                                    | 106,846.20 | 100.00% | 8 | 9  | 11 | 0.12% | 9.90%  | APSRQD VYGPQP QVR    | 4.39 | 1,697.87 |
| ATP | 6011 | PREDICTED: similar to catenin, delta 1                                           | gi 194673532                                    | 106,846.20 | 100.00% | 8 | 9  | 11 | 0.12% | 9.90%  | FVGDAD LER           | 2.65 | 1,021.50 |
| ATP | 6011 | PREDICTED: similar to catenin, delta 1                                           | gi 194673532                                    | 106,846.20 | 100.00% | 8 | 9  | 11 | 0.12% | 9.90%  | KPTEDP TNDTVD FPKR   | 4.75 | 1,859.91 |
| ATP | 6011 | PREDICTED: similar to catenin, delta 1                                           | gi 194673532                                    | 106,846.20 | 100.00% | 8 | 9  | 11 | 0.12% | 9.90%  | NFHYPD DGYSR         | 2.26 | 1,352.60 |
| ATP | 6011 | PREDICTED: similar to catenin, delta 1                                           | gi 194673532                                    | 106,846.20 | 100.00% | 8 | 9  | 11 | 0.12% | 9.90%  | QDVYGP QPQVR         | 2.68 | 1,286.65 |
| ATP | 6011 | PREDICTED: similar to catenin, delta 1                                           | gi 194673532                                    | 106,846.20 | 100.00% | 8 | 9  | 11 | 0.12% | 9.90%  | SLDNNY STLNER        | 2.86 | 1,425.66 |
| ATP | 6011 | PREDICTED: similar to catenin, delta 1                                           | gi 194673532                                    | 106,846.20 | 100.00% | 8 | 9  | 11 | 0.12% | 9.90%  | VSPQDA SPLLAN GTLTR  | 3.73 | 1,739.93 |

|     |      |                                                |                                                 |            |         |   |   |    |       |        |                                         |      |          |
|-----|------|------------------------------------------------|-------------------------------------------------|------------|---------|---|---|----|-------|--------|-----------------------------------------|------|----------|
| ATP | 6011 | FK506 binding protein 11, 19 kDa               | gi 114053349,gi 122138212,gi 82571590           | 22,457.80  | 100.00% | 5 | 6 | 11 | 0.12% | 15.30% | DPLVIEL GQK                             | 3.37 | 1,111.64 |
| ATP | 6011 | FK506 binding protein 11, 19 kDa               | gi 114053349,gi 122138212,gi 82571590           | 22,457.80  | 100.00% | 5 | 6 | 11 | 0.12% | 15.30% | IFDTSLT RDPLVIE LGQK                    | 5.09 | 2,045.13 |
| ATP | 6011 | FK506 binding protein 11, 19 kDa               | gi 114053349,gi 122138212,gi 82571590           | 22,457.80  | 100.00% | 5 | 6 | 11 | 0.12% | 15.30% | RVIIPSH LAYGK                           | 4.87 | 1,353.80 |
| ATP | 6011 | FK506 binding protein 11, 19 kDa               | gi 114053349,gi 122138212,gi 82571590           | 22,457.80  | 100.00% | 5 | 6 | 11 | 0.12% | 15.30% | VIIPSHL AYGK                            | 3.02 | 1,197.70 |
| ATP | 6011 | FK506 binding protein 11, 19 kDa               | gi 114053349,gi 122138212,gi 82571590           | 22,457.80  | 100.00% | 5 | 6 | 11 | 0.12% | 15.30% | VIIPSHL AYGKR                           | 2.15 | 1,353.80 |
| ATP | 6011 | SPTLC2 protein                                 | gi 148745525,gi 149642795                       | 62,871.50  | 100.00% | 3 | 3 | 3  | 0.03% | 10.90% | EEQKDF VSLYQD FENFYT R                  | 4.09 | 2,458.12 |
| ATP | 6011 | SPTLC2 protein                                 | gi 148745525,gi 149642795                       | 62,871.50  | 100.00% | 3 | 3 | 3  | 0.03% | 10.90% | NIGVVV VGFPAT PIIESR                    | 4.47 | 1,868.06 |
| ATP | 6011 | SPTLC2 protein                                 | gi 148745525,gi 149642795                       | 62,871.50  | 100.00% | 3 | 3 | 3  | 0.03% | 10.90% | SSAAAA AAAAGQ IHHVTE NGGLYK             | 3.75 | 2,295.15 |
| ATP | 6011 | ribosomal S15-like protein                     | gi 58760350,gi 66792868,gi 74353853,gi 75060401 | 17,008.80  | 99.80%  | 2 | 2 | 2  | 0.02% | 33.80% | GVDLDDQ LLDMSY EQLMQL YSAR              | 3.1  | 2,604.23 |
| ATP | 6011 | ribosomal S15-like protein                     | gi 58760350,gi 66792868,gi 74353853,gi 75060401 | 17,008.80  | 99.80%  | 2 | 2 | 2  | 0.02% | 33.80% | TFNQVEI KPEMIG HYLGEF SITYKPV K         | 2.44 | 3,184.64 |
| ATP | 6011 | PREDIC TED: similar to neuropili n-1 isoform 1 | gi 76632212,gi 76632226                         | 102,993.80 | 100.00% | 4 | 4 | 4  | 0.04% | 8.99%  | DKLNPQ STYSEA                           | 3.44 | 1,352.63 |
| ATP | 6011 | PREDIC TED: similar to neuropili n-1 isoform 1 | gi 76632212,gi 76632226                         | 102,993.80 | 100.00% | 4 | 4 | 4  | 0.04% | 8.99%  | IESPGYL TSPGYP HSYHPS EKCEWL IQAPDPY QR | 1.74 | 3,945.85 |
| ATP | 6011 | PREDIC TED: similar to neuropili n-1 isoform 1 | gi 76632212,gi 76632226                         | 102,993.80 | 100.00% | 4 | 4 | 4  | 0.04% | 8.99%  | SFEGNN NYDTPE LR                        | 3.39 | 1,655.73 |

|     |      |                                                                         |                                                                                                 |            |         |   |   |   |       |        |                                                   |          |
|-----|------|-------------------------------------------------------------------------|-------------------------------------------------------------------------------------------------|------------|---------|---|---|---|-------|--------|---------------------------------------------------|----------|
| ATP | 6011 | PREDIC TED: similar to neuropilin-1 isoform 1                           | gi 7663221                                                                                      | 102,993.80 | 100.00% | 4 | 4 | 4 | 0.04% | 8.99%  | TGPIQDH 5.15<br>TG DGNFI<br>YSQADE<br>NQK         | 2,535.14 |
| ATP | 6011 | PREDIC TED: similar to pincher isoform 1                                | gi 7662746                                                                                      | 61,009.90  | 99.80%  | 2 | 2 | 3 | 0.03% | 4.26%  | LFEAEA 3.4<br>QDLFR                               | 1,338.67 |
| ATP | 6011 | PREDIC TED: similar to pincher isoform 1                                | gi 7662746                                                                                      | 61,009.90  | 99.80%  | 2 | 2 | 3 | 0.03% | 4.26%  | LIEAVDN 3.76<br>MLTNK                             | 1,376.71 |
| ATP | 6011 | RPS7 protein                                                            | gi 1488773<br>74,gi 14964<br>2623,gi 205<br>806695                                              | 22,109.50  | 100.00% | 3 | 3 | 4 | 0.04% | 23.70% | DVNF EF 3.27<br>PEFQL                             | 1,384.64 |
| ATP | 6011 | RPS7 protein                                                            | gi 1488773<br>74,gi 14964<br>2623,gi 205<br>806695                                              | 22,109.50  | 100.00% | 3 | 3 | 4 | 0.04% | 23.70% | KAIIFV P 3.97<br>VPQLK                            | 1,465.95 |
| ATP | 6011 | RPS7 protein                                                            | gi 1488773<br>74,gi 14964<br>2623,gi 205<br>806695                                              | 22,109.50  | 100.00% | 3 | 3 | 4 | 0.04% | 23.70% | TLTAVH 3.24<br>DAILEDL<br>VFPSEIV<br>GK           | 2,367.28 |
| ATP | 6011 | RRAS2 protein                                                           | gi 1487439<br>16,gi 14994<br>4707                                                               | 23,381.60  | 99.80%  | 2 | 3 | 3 | 0.03% | 13.70% | LDILD TA 4.17<br>GQEEFG<br>AMR                    | 1,781.84 |
| ATP | 6011 | RRAS2 protein                                                           | gi 1487439<br>16,gi 14994<br>4707                                                               | 23,381.60  | 99.80%  | 2 | 3 | 3 | 0.03% | 13.70% | MNV DQ 2.97<br>AFHELV<br>R                        | 1,474.71 |
| ATP | 6011 | endothelial differentiation, sphingolipid G-protein-coupled receptor, 1 | gi 5985811<br>9,gi 606502<br>08,gi 60650<br>268,gi 6188<br>9066,gi 750<br>70049,gi 88<br>954151 | 42,933.90  | 99.80%  | 2 | 2 | 2 | 0.02% | 10.70% | FTRPIA 5.08<br>GMEFSR                             | 1,540.79 |
| ATP | 6011 | endothelial differentiation, sphingolipid G-protein-coupled receptor, 1 | gi 5985811<br>9,gi 606502<br>08,gi 60650<br>268,gi 6188<br>9066,gi 750<br>70049,gi 88<br>954151 | 42,933.90  | 99.80%  | 2 | 2 | 2 | 0.02% | 10.70% | SDNSSH 4.32<br>PQKDDG<br>DNPETI<br>MSSGNV<br>NSSS | 2,922.19 |
| ATP | 6011 | PREDIC TED: similar to mKIAA4036 protein isoform 2                      | gi 1199175                                                                                      | 67,513.30  | 100.00% | 3 | 3 | 5 | 0.05% | 8.01%  | SISYHE 4.46<br>TLGEAL<br>QGVELE<br>FSGLDIK        | 2,872.44 |
| ATP | 6011 | PREDIC TED: similar to mKIAA4036 protein isoform 2                      | gi 1199175                                                                                      | 67,513.30  | 100.00% | 3 | 3 | 5 | 0.05% | 8.01%  | VNAVPR 2.04<br>PIPEK                              | 1,219.72 |

|     |      |                                                                                                                |            |           |         |   |   |    |       |        |                        |          |
|-----|------|----------------------------------------------------------------------------------------------------------------|------------|-----------|---------|---|---|----|-------|--------|------------------------|----------|
| ATP | 6011 | PREDIC TED: 18<br>similar to mKIAA4036 protein isoform 2                                                       | gi 1199175 | 67,513.30 | 100.00% | 3 | 3 | 5  | 0.05% | 8.01%  | YLDPSFF QHR 1.63       | 1,309.63 |
| ATP | 6011 | PREDIC TED: 20<br>similar to Transmembrane emp24 domain-containing protein 2 precursor (Membrane protein p24A) | gi 1946746 | 22,715.40 | 99.80%  | 2 | 3 | 8  | 0.09% | 12.40% | IVMFTID IGEAPK 4.02    | 1,449.77 |
| ATP | 6011 | PREDIC TED: 20<br>similar to Transmembrane emp24 domain-containing protein 2 precursor (Membrane protein p24A) | gi 1946746 | 22,715.40 | 99.80%  | 2 | 3 | 8  | 0.09% | 12.40% | YTFAAH MDGTY K 3.42    | 1,420.62 |
| ATP | 6011 | PREDIC TED: 7<br>integrin, beta 3 (platelet glycoprotein IIIa, antigen CD61) isoform 1                         | gi 7667065 | 86,518.30 | 100.00% | 6 | 8 | 11 | 0.12% | 7.91%  | EATSTFT NITYR 3.63     | 1,403.68 |
| ATP | 6011 | PREDIC TED: 7<br>integrin, beta 3 (platelet glycoprotein IIIa, antigen CD61) isoform 1                         | gi 7667065 | 86,518.30 | 100.00% | 6 | 8 | 11 | 0.12% | 7.91%  | GTGDSS QITQVSP QR 3.71 | 1,560.76 |
| ATP | 6011 | PREDIC TED: 7<br>integrin, beta 3 (platelet glycoprotein IIIa, antigen CD61) isoform 1                         | gi 7667065 | 86,518.30 | 100.00% | 6 | 8 | 11 | 0.12% | 7.91%  | HVLTLT DQVTR 3.71      | 1,282.71 |

|     |      |                                                                                                               |                                                                  |           |         |   |   |    |       |        |                                       |      |          |
|-----|------|---------------------------------------------------------------------------------------------------------------|------------------------------------------------------------------|-----------|---------|---|---|----|-------|--------|---------------------------------------|------|----------|
| ATP | 6011 | PREDIC<br>TED:<br>integrin,<br>beta 3<br>(platelet<br>glycoprot<br>ein IIIa,<br>antigen<br>CD61)<br>isoform 1 | gi 7667065<br>7                                                  | 86,518.30 | 100.00% | 6 | 8 | 11 | 0.12% | 7.91%  | ILEARPL<br>SDKGTG<br>DSSQITQ<br>VSPQR | 6.42 | 2,683.40 |
| ATP | 6011 | PREDIC<br>TED:<br>integrin,<br>beta 3<br>(platelet<br>glycoprot<br>ein IIIa,<br>antigen<br>CD61)<br>isoform 1 | gi 7667065<br>7                                                  | 86,518.30 | 100.00% | 6 | 8 | 11 | 0.12% | 7.91%  | NDASHL<br>LVFTTD<br>AK                | 4.54 | 1,531.78 |
| ATP | 6011 | PREDIC<br>TED:<br>integrin,<br>beta 3<br>(platelet<br>glycoprot<br>ein IIIa,<br>antigen<br>CD61)<br>isoform 1 | gi 7667065<br>7                                                  | 86,518.30 | 100.00% | 6 | 8 | 11 | 0.12% | 7.91%  | PLSDKG<br>TGDSSQI<br>TQVSPQ<br>R      | 5.38 | 2,101.05 |
| ATP | 6011 | heat<br>shock<br>90kDa<br>protein 1,<br>beta                                                                  | gi 1186018<br>68,gi 34392<br>345,gi 7507<br>2499,gi 957<br>67684 | 83,238.20 | 100.00% | 7 | 7 | 10 | 0.11% | 15.50% | ADLVNN<br>LGTIK                       | 3.54 | 1,228.69 |
| ATP | 6011 | heat<br>shock<br>90kDa<br>protein 1,<br>beta                                                                  | gi 1186018<br>68,gi 34392<br>345,gi 7507<br>2499,gi 957<br>67684 | 83,238.20 | 100.00% | 7 | 7 | 10 | 0.11% | 15.50% | ELISNAS<br>DALDKI<br>R                | 3.6  | 1,544.83 |
| ATP | 6011 | heat<br>shock<br>90kDa<br>protein 1,<br>beta                                                                  | gi 1186018<br>68,gi 34392<br>345,gi 7507<br>2499,gi 957<br>67684 | 83,238.20 | 100.00% | 7 | 7 | 10 | 0.11% | 15.50% | GVVDSE<br>DLPLNIS<br>R                | 4.86 | 1,513.79 |
| ATP | 6011 | heat<br>shock<br>90kDa<br>protein 1,<br>beta                                                                  | gi 1186018<br>68,gi 34392<br>345,gi 7507<br>2499,gi 957<br>67684 | 83,238.20 | 100.00% | 7 | 7 | 10 | 0.11% | 15.50% | HLEINPD<br>HPIVETL<br>R               | 4.35 | 1,782.95 |
| ATP | 6011 | heat<br>shock<br>90kDa<br>protein 1,<br>beta                                                                  | gi 1186018<br>68,gi 34392<br>345,gi 7507<br>2499,gi 957<br>67684 | 83,238.20 | 100.00% | 7 | 7 | 10 | 0.11% | 15.50% | HSQFIGY<br>PITLYLE<br>K               | 3.37 | 1,808.96 |
| ATP | 6011 | heat<br>shock<br>90kDa<br>protein 1,<br>beta                                                                  | gi 1186018<br>68,gi 34392<br>345,gi 7507<br>2499,gi 957<br>67684 | 83,238.20 | 100.00% | 7 | 7 | 10 | 0.11% | 15.50% | NPDDITQ<br>EEYGEF<br>YK               | 3.55 | 1,847.80 |
| ATP | 6011 | heat<br>shock<br>90kDa<br>protein 1,<br>beta                                                                  | gi 1186018<br>68,gi 34392<br>345,gi 7507<br>2499,gi 957<br>67684 | 83,238.20 | 100.00% | 7 | 7 | 10 | 0.11% | 15.50% | TLTLVD<br>TGIGMT<br>K                 | 4.55 | 1,365.73 |
| ATP | 6011 | heat<br>shock<br>90kDa<br>protein 1,<br>beta                                                                  | gi 1186018<br>68,gi 34392<br>345,gi 7507<br>2499,gi 957<br>67684 | 83,238.20 | 100.00% | 7 | 7 | 10 | 0.11% | 15.50% | YESLTD<br>PSKLDS<br>GK                | 2.97 | 1,539.75 |



|     |      |                                                                     |                                                  |           |         |   |   |   |       |        |                                                                       |          |
|-----|------|---------------------------------------------------------------------|--------------------------------------------------|-----------|---------|---|---|---|-------|--------|-----------------------------------------------------------------------|----------|
| ATP | 6011 | Solute carrier family 1 (neutral amino acid transporter), member 5  | gi 115305216,gi 15145909,gi 21541958,gi 27807087 | 56,431.20 | 99.80%  | 2 | 2 | 2 | 0.02% | 4.45%  | EVLDSFL 3.2<br>DLVR                                                   | 1,305.71 |
| ATP | 6011 | Solute carrier family 1 (neutral amino acid transporter), member 5  | gi 115305216,gi 15145909,gi 21541958,gi 27807087 | 56,431.20 | 99.80%  | 2 | 2 | 2 | 0.02% | 4.45%  | NIFPSNL 1.96<br>VSAAFR                                                | 1,435.77 |
| ATP | 6011 | PREDICTED: protein disulfide isomerase family A, member 6 isoform 7 | gi 119903961,gi 151553573                        | 64,497.70 | 100.00% | 3 | 3 | 4 | 0.04% | 9.15%  | ALDLFS 3.53<br>DNAPPP<br>ELLEIINE<br>DVAK                             | 2,623.35 |
| ATP | 6011 | PREDICTED: protein disulfide isomerase family A, member 6 isoform 7 | gi 119903961,gi 151553573                        | 64,497.70 | 100.00% | 3 | 3 | 4 | 0.04% | 9.15%  | GSFSEQ 3.94<br>GINEFLR                                                | 1,483.72 |
| ATP | 6011 | PREDICTED: protein disulfide isomerase family A, member 6 isoform 7 | gi 119903961,gi 151553573                        | 64,497.70 | 100.00% | 3 | 3 | 4 | 0.04% | 9.15%  | GSTAPV 4.62<br>GGGAFP<br>TISTR                                        | 1,575.81 |
| ATP | 6011 | Deoxyribonuclease I-like 1                                          | gi 151553571                                     | 35,175.30 | 99.80%  | 2 | 3 | 3 | 0.03% | 8.86%  | IVLHGE 2.06<br>HLQSLLR                                                | 1,514.88 |
| ATP | 6011 | Deoxyribonuclease I-like 1                                          | gi 151553571                                     | 35,175.30 | 99.80%  | 2 | 3 | 3 | 0.03% | 8.86%  | VLPSLVL 3.87<br>VPLHTT<br>PK                                          | 1,614.00 |
| ATP | 6018 | TIMM23 protein                                                      | gi 134025149,gi 139947578,gi 215274655           | 21,809.90 | 99.80%  | 2 | 2 | 2 | 0.02% | 27.80% | TTGGLA 4.3<br>GFFGAG<br>GAGYSH<br>ADLAGV<br>PLTGMN<br>PLSPYLN<br>VDPR | 4,034.97 |
| ATP | 6018 | TIMM23 protein                                                      | gi 134025149,gi 139947578,gi 215274655           | 21,809.90 | 99.80%  | 2 | 2 | 2 | 0.02% | 27.80% | YLVQDT 2.57<br>DEFILPT<br>GANK                                        | 1,923.97 |

|     |      |                                                                                  |                                                                       |            |         |   |    |    |       |        |                                                       |      |          |
|-----|------|----------------------------------------------------------------------------------|-----------------------------------------------------------------------|------------|---------|---|----|----|-------|--------|-------------------------------------------------------|------|----------|
| ATP | 6018 | TMEM15 protein                                                                   | gi 133777923,gi 134085844,gi 146186960,gi 218551717                   | 38,121.60  | 99.80%  | 2 | 2  | 3  | 0.03% | 6.84%  | RYDVGVA<br>PSSITISL<br>PGTDPQ<br>DAER                 | 3.92 | 2,545.25 |
| ATP | 6018 | TMEM15 protein                                                                   | gi 133777923,gi 134085844,gi 146186960,gi 218551717                   | 38,121.60  | 99.80%  | 2 | 2  | 3  | 0.03% | 6.84%  | YDVGAP<br>SSITISLP<br>GTDPQD<br>AER                   | 4.14 | 2,389.15 |
| ATP | 6018 | similar to translationally controlled tumor protein                              | gi 28189813,gi 59858437,gi 62177164,gi 62901141,gi 74356483           | 19,564.00  | 99.80%  | 2 | 3  | 3  | 0.03% | 15.70% | DLISHDE<br>MFSDIY<br>K                                | 2.67 | 1,728.78 |
| ATP | 6018 | similar to translationally controlled tumor protein                              | gi 28189813,gi 59858437,gi 62177164,gi 62901141,gi 74356483           | 19,564.00  | 99.80%  | 2 | 3  | 3  | 0.03% | 15.70% | VKPFMT<br>GAAEQI<br>K                                 | 2.68 | 1,435.76 |
| ATP | 6018 | Chain B, Subcomplex Of The Stator Of Bovine Mitochondrial Atp Synthase           | gi 110591027,gi 110591030,gi 114686,gi 27807305,gi 599873,gi 74356487 | 18,544.10  | 99.80%  | 2 | 3  | 4  | 0.03% | 19.40% | IQEYEKE<br>LEK                                        | 3.44 | 1,308.67 |
| ATP | 6018 | Chain B, Subcomplex Of The Stator Of Bovine Mitochondrial Atp Synthase           | gi 110591027,gi 110591030,gi 114686,gi 27807305,gi 599873,gi 74356487 | 18,544.10  | 99.80%  | 2 | 3  | 4  | 0.03% | 19.40% | NIIPFDQ<br>MTIEDL<br>NEVFPE<br>TK                     | 3.01 | 2,509.22 |
| ATP | 6018 | PREDICTED: integrin, alpha 5 (fibronectin receptor, alpha polypeptide) isoform 3 | gi 194667041                                                          | 119,589.00 | 100.00% | 7 | 10 | 18 | 0.15% | 13.20% | AQILLDC<br>GEDNIC<br>VPDLQL<br>EVFGEQ<br>NHVYLG<br>DK | 3.79 | 3,687.77 |
| ATP | 6018 | PREDICTED: integrin, alpha 5 (fibronectin receptor, alpha polypeptide) isoform 3 | gi 194667041                                                          | 119,589.00 | 100.00% | 7 | 10 | 18 | 0.15% | 13.20% | DLDGNG<br>YPDLIVG<br>SFGVDK                           | 4.19 | 1,980.96 |

|     |      |                                                                                  |                                                              |            |         |   |    |    |       |        |                                                       |      |          |
|-----|------|----------------------------------------------------------------------------------|--------------------------------------------------------------|------------|---------|---|----|----|-------|--------|-------------------------------------------------------|------|----------|
| ATP | 6018 | PREDICTED: integrin, alpha 5 (fibronectin receptor, alpha polypeptide) isoform 3 | gi 194667041                                                 | 119,589.00 | 100.00% | 7 | 10 | 18 | 0.15% | 13.20% | LAGMEP<br>TPTLTLT<br>GQDEFG<br>R                      | 6.06 | 2,150.04 |
| ATP | 6018 | PREDICTED: integrin, alpha 5 (fibronectin receptor, alpha polypeptide) isoform 3 | gi 194667041                                                 | 119,589.00 | 100.00% | 7 | 10 | 18 | 0.15% | 13.20% | QASSIYD<br>DSYLG<br>SVAVGE<br>FSGDDR<br>EDFVAG<br>VPK | 3.07 | 3,643.67 |
| ATP | 6018 | PREDICTED: integrin, alpha 5 (fibronectin receptor, alpha polypeptide) isoform 3 | gi 194667041                                                 | 119,589.00 | 100.00% | 7 | 10 | 18 | 0.15% | 13.20% | QATLTQ<br>LLIQNG<br>AR                                | 4.27 | 1,627.91 |
| ATP | 6018 | PREDICTED: integrin, alpha 5 (fibronectin receptor, alpha polypeptide) isoform 3 | gi 194667041                                                 | 119,589.00 | 100.00% | 7 | 10 | 18 | 0.15% | 13.20% | TIQDFDQ<br>ILSK                                       | 3.62 | 1,339.73 |
| ATP | 6018 | PREDICTED: integrin, alpha 5 (fibronectin receptor, alpha polypeptide) isoform 3 | gi 194667041                                                 | 119,589.00 | 100.00% | 7 | 10 | 18 | 0.15% | 13.20% | VTAPPE<br>AEYSG<br>VR                                 | 2.96 | 1,488.77 |
| ATP | 6018 | caveolin-1                                                                       | gi 1840144, gi 2493547, gi 2780671, gi 38322701, gi 56181138 | 20,577.50  | 100.00% | 3 | 5  | 11 | 0.09% | 19.70% | ASFTTFT<br>VTK                                        | 2.48 | 1,102.58 |
| ATP | 6018 | caveolin-1                                                                       | gi 1840144, gi 2493547, gi 2780671, gi 38322701, gi 56181138 | 20,577.50  | 100.00% | 3 | 5  | 11 | 0.09% | 19.70% | YVDSEG<br>HLYTVPI<br>R                                | 4.78 | 1,648.83 |

|     |      |                   |                                                                                  |           |         |   |   |    |       |        |                                           |      |          |
|-----|------|-------------------|----------------------------------------------------------------------------------|-----------|---------|---|---|----|-------|--------|-------------------------------------------|------|----------|
| ATP | 6018 | caveolin-1        | gi 1840144, gi 2493547, gi 27806715, gi 38322701, gi 56181138                    | 20,577.50 | 100.00% | 3 | 5 | 11 | 0.09% | 19.70% | YVDSEG<br>HLYTVPI<br>REQGNI<br>YKPNNK     | 4.84 | 2,934.47 |
| ATP | 6018 | RTN3 protein      | gi 115305093, gi 122132179, gi 146231798, gi 151554368, gi 32880223, gi 38327594 | 25,478.60 | 99.80%  | 2 | 4 | 4  | 0.03% | 5.49%  | TQIDHY<br>VGIAR                           | 2.22 | 1,272.67 |
| ATP | 6018 | RTN3 protein      | gi 115305093, gi 122132179, gi 146231798, gi 151554368, gi 32880223, gi 38327594 | 25,478.60 | 99.80%  | 2 | 4 | 4  | 0.03% | 5.49%  | YKTQID<br>HYVGIA<br>R                     | 2.69 | 1,563.83 |
| ATP | 6018 | LMAN2 protein     | gi 151553875, gi 155372333                                                       | 40,385.10 | 100.00% | 5 | 7 | 11 | 0.09% | 20.30% | DNFHGL<br>AIFLDY<br>PNDETT<br>ER          | 4.2  | 2,468.14 |
| ATP | 6018 | LMAN2 protein     | gi 151553875, gi 155372333                                                       | 40,385.10 | 100.00% | 5 | 7 | 11 | 0.09% | 20.30% | DNVDDP<br>TGNFR                           | 3.22 | 1,249.54 |
| ATP | 6018 | LMAN2 protein     | gi 151553875, gi 155372333                                                       | 40,385.10 | 100.00% | 5 | 7 | 11 | 0.09% | 20.30% | DRLVPG<br>PVFGSK                          | 1.97 | 1,271.71 |
| ATP | 6018 | LMAN2 protein     | gi 151553875, gi 155372333                                                       | 40,385.10 | 100.00% | 5 | 7 | 11 | 0.09% | 20.30% | LPTGYG<br>FGASAG<br>TGDLS<br>NHDIISM<br>K | 5.24 | 2,746.27 |
| ATP | 6018 | LMAN2 protein     | gi 151553875, gi 155372333                                                       | 40,385.10 | 100.00% | 5 | 7 | 11 | 0.09% | 20.30% | SPKDNV<br>DDPTGN<br>FR                    | 4.16 | 1,561.72 |
| ATP | 6018 | LOC789567 protein | gi 148878411, gi 155372329                                                       | 34,911.10 | 99.80%  | 2 | 3 | 3  | 0.03% | 4.81%  | SQDKLN<br>QVSSEIR                         | 4.33 | 1,503.78 |
| ATP | 6018 | LOC789567 protein | gi 148878411, gi 155372329                                                       | 34,911.10 | 99.80%  | 2 | 3 | 3  | 0.03% | 4.81%  | SQDKLN<br>QVSSEIR<br>EK                   | 3.27 | 1,760.91 |

|     |      |                                                                                                                                                                                                                     |            |           |         |   |   |   |       |       |                        |      |          |
|-----|------|---------------------------------------------------------------------------------------------------------------------------------------------------------------------------------------------------------------------|------------|-----------|---------|---|---|---|-------|-------|------------------------|------|----------|
| ATP | 6018 | PREDIC TED: 22<br>similar to Splicing factor, proline- and glutamine-rich (Polypyrimidine tract-binding protein-associate d-splicing factor) (PTB-associate d-splicing factor) (PSF) (DNA-binding p52/p100 complex, | gi 1946659 | 76,230.60 | 99.80%  | 2 | 2 | 2 | 0.02% | 3.96% | FATHAA ALSVR           | 3.57 | 1,143.63 |
| ATP | 6018 | PREDIC TED: 22<br>similar to Splicing factor, proline- and glutamine-rich (Polypyrimidine tract-binding protein-associate d-splicing factor) (PTB-associate d-splicing factor) (PSF) (DNA-binding p52/p100 complex, | gi 1946659 | 76,230.60 | 99.80%  | 2 | 2 | 2 | 0.02% | 3.96% | LFVGNL PADITED EFKR    | 2.49 | 1,964.01 |
| ATP | 6018 | PREDIC TED: 73<br>similar to polypeptide of N-acetylgalactosaminyltransferase 2                                                                                                                                     | gi 1199183 | 64,740.20 | 100.00% | 3 | 3 | 4 | 0.03% | 8.41% | EILVDD YSNDPE DGALLG K | 3.83 | 2,176.07 |
| ATP | 6018 | PREDIC TED: 73<br>similar to polypeptide of N-acetylgalactosaminyltransferase 2                                                                                                                                     | gi 1199183 | 64,740.20 | 100.00% | 3 | 3 | 4 | 0.03% | 8.41% | NKFNQV ESDKLR          | 2.91 | 1,477.78 |

|     |      |                                                                                   |                                        |            |         |    |    |    |       |        |                                           |      |          |
|-----|------|-----------------------------------------------------------------------------------|----------------------------------------|------------|---------|----|----|----|-------|--------|-------------------------------------------|------|----------|
| ATP | 6018 | PREDICTED:<br>similar to<br>polypeptide<br>de N-acetylgalactosaminyltransferase 2 | gi 119918373                           | 64,740.20  | 100.00% | 3  | 3  | 4  | 0.03% | 8.41%  | QHPYTF<br>PGGSGT<br>VFAR                  | 3.88 | 1,721.84 |
| ATP | 6018 | ATPase, Na+/K+ transporting, alpha 1 polypeptide                                  | gi 115305284,gi 116003819,gi 122132194 | 112,627.60 | 100.00% | 21 | 31 | 65 | 0.56% | 26.00% | ADIGVA<br>MGIAGS<br>DVSK                  | 4.61 | 1,506.75 |
| ATP | 6018 | ATPase, Na+/K+ transporting, alpha 1 polypeptide                                  | gi 115305284,gi 116003819,gi 122132194 | 112,627.60 | 100.00% | 21 | 31 | 65 | 0.56% | 26.00% | AVAGDA<br>SESALLK                         | 4.11 | 1,231.65 |
| ATP | 6018 | ATPase, Na+/K+ transporting, alpha 1 polypeptide                                  | gi 115305284,gi 116003819,gi 122132194 | 112,627.60 | 100.00% | 21 | 31 | 65 | 0.56% | 26.00% | AVFQAN<br>QDNLPI<br>LK                    | 4.18 | 1,570.86 |
| ATP | 6018 | ATPase, Na+/K+ transporting, alpha 1 polypeptide                                  | gi 115305284,gi 116003819,gi 122132194 | 112,627.60 | 100.00% | 21 | 31 | 65 | 0.56% | 26.00% | AVFQAN<br>QDNLPI<br>KR                    | 3.9  | 1,726.96 |
| ATP | 6018 | ATPase, Na+/K+ transporting, alpha 1 polypeptide                                  | gi 115305284,gi 116003819,gi 122132194 | 112,627.60 | 100.00% | 21 | 31 | 65 | 0.56% | 26.00% | DKYEPA<br>AVSEHG<br>DK                    | 4.47 | 1,545.72 |
| ATP | 6018 | ATPase, Na+/K+ transporting, alpha 1 polypeptide                                  | gi 115305284,gi 116003819,gi 122132194 | 112,627.60 | 100.00% | 21 | 31 | 65 | 0.56% | 26.00% | DMTPEQ<br>LDDILK                          | 2.3  | 1,417.69 |
| ATP | 6018 | ATPase, Na+/K+ transporting, alpha 1 polypeptide                                  | gi 115305284,gi 116003819,gi 122132194 | 112,627.60 | 100.00% | 21 | 31 | 65 | 0.56% | 26.00% | EQPLDE<br>ELKDAF<br>QNAYLE<br>LGGLGE<br>R | 3.83 | 2,834.38 |
| ATP | 6018 | ATPase, Na+/K+ transporting, alpha 1 polypeptide                                  | gi 115305284,gi 116003819,gi 122132194 | 112,627.60 | 100.00% | 21 | 31 | 65 | 0.56% | 26.00% | GGDRIP<br>ADLR                            | 2.47 | 1,069.58 |

|     |      |                                                  |                                        |            |         |    |    |    |       |        |                                     |      |          |
|-----|------|--------------------------------------------------|----------------------------------------|------------|---------|----|----|----|-------|--------|-------------------------------------|------|----------|
| ATP | 6018 | ATPase, Na+/K+ transporting, alpha 1 polypeptide | gi 115305284.gi 116003819.gi 122132194 | 112,627.60 | 100.00% | 21 | 31 | 65 | 0.56% | 26.00% | GVGIISE<br>GNETVE<br>DIAAR          | 5.29 | 1,829.92 |
| ATP | 6018 | ATPase, Na+/K+ transporting, alpha 1 polypeptide | gi 115305284.gi 116003819.gi 122132194 | 112,627.60 | 100.00% | 21 | 31 | 65 | 0.56% | 26.00% | IVEIPFNS<br>TNK                     | 2.6  | 1,261.68 |
| ATP | 6018 | ATPase, Na+/K+ transporting, alpha 1 polypeptide | gi 115305284.gi 116003819.gi 122132194 | 112,627.60 | 100.00% | 21 | 31 | 65 | 0.56% | 26.00% | KADIGV<br>AMGIAG<br>SDVSK           | 6.11 | 1,634.84 |
| ATP | 6018 | ATPase, Na+/K+ transporting, alpha 1 polypeptide | gi 115305284.gi 116003819.gi 122132194 | 112,627.60 | 100.00% | 21 | 31 | 65 | 0.56% | 26.00% | LNIPVSQ<br>VNPR                     | 3.39 | 1,236.71 |
| ATP | 6018 | ATPase, Na+/K+ transporting, alpha 1 polypeptide | gi 115305284.gi 116003819.gi 122132194 | 112,627.60 | 100.00% | 21 | 31 | 65 | 0.56% | 26.00% | LSLDEL<br>HR                        | 2.62 | 982.5317 |
| ATP | 6018 | ATPase, Na+/K+ transporting, alpha 1 polypeptide | gi 115305284.gi 116003819.gi 122132194 | 112,627.60 | 100.00% | 21 | 31 | 65 | 0.56% | 26.00% | MSINAE<br>EVVVG<br>LVEVK            | 3.27 | 1,846.95 |
| ATP | 6018 | ATPase, Na+/K+ transporting, alpha 1 polypeptide | gi 115305284.gi 116003819.gi 122132194 | 112,627.60 | 100.00% | 21 | 31 | 65 | 0.56% | 26.00% | NMVPQQ<br>ALVIR                     | 3.86 | 1,284.71 |
| ATP | 6018 | ATPase, Na+/K+ transporting, alpha 1 polypeptide | gi 115305284.gi 116003819.gi 122132194 | 112,627.60 | 100.00% | 21 | 31 | 65 | 0.56% | 26.00% | QAADMI<br>LLDDNF<br>ASIVTGV<br>EEGR | 3.81 | 2,480.20 |
| ATP | 6018 | ATPase, Na+/K+ transporting, alpha 1 polypeptide | gi 115305284.gi 116003819.gi 122132194 | 112,627.60 | 100.00% | 21 | 31 | 65 | 0.56% | 26.00% | QGAIVA<br>VTGDGV<br>NDSPAL<br>K     | 4.17 | 1,811.95 |
| ATP | 6018 | ATPase, Na+/K+ transporting, alpha 1 polypeptide | gi 115305284.gi 116003819.gi 122132194 | 112,627.60 | 100.00% | 21 | 31 | 65 | 0.56% | 26.00% | QGAIVA<br>VTGDGV<br>NDSPAL<br>KK    | 3.2  | 1,940.05 |

|     |      |                                                  |                                                             |            |         |    |    |    |       |        |                                         |          |
|-----|------|--------------------------------------------------|-------------------------------------------------------------|------------|---------|----|----|----|-------|--------|-----------------------------------------|----------|
| ATP | 6018 | ATPase, Na+/K+ transporting, alpha 1 polypeptide | gi 115305284,gi 116003819,gi 122132194                      | 112,627.60 | 100.00% | 21 | 31 | 65 | 0.56% | 26.00% | SPDFTNE 4.48<br>NPLETR                  | 1,519.70 |
| ATP | 6018 | ATPase, Na+/K+ transporting, alpha 1 polypeptide | gi 115305284,gi 116003819,gi 122132194                      | 112,627.60 | 100.00% | 21 | 31 | 65 | 0.56% | 26.00% | VDNSSL 4.18<br>TGESEP<br>QTR            | 1,619.75 |
| ATP | 6018 | ATPase, Na+/K+ transporting, alpha 1 polypeptide | gi 115305284,gi 116003819,gi 122132194                      | 112,627.60 | 100.00% | 21 | 31 | 65 | 0.56% | 26.00% | VIMVTG 4.08<br>DHPITAK                  | 1,397.75 |
| ATP | 6018 | PTPLAD 1 protein                                 | gi 154425645,gi 157074148,gi 166199295                      | 43,116.60  | 99.80%  | 2  | 3  | 4  | 0.03% | 8.56%  | FSFTLPY 2.18<br>PVK                     | 1,198.65 |
| ATP | 6018 | PTPLAD 1 protein                                 | gi 154425645,gi 157074148,gi 166199295                      | 43,116.60  | 99.80%  | 2  | 3  | 4  | 0.03% | 8.56%  | VELSDV 3.65<br>QNPAISI<br>TENVLH<br>FK  | 2,353.24 |
| ATP | 6018 | COL18A1 protein                                  | gi 133778103,gi 134085613,gi 157742960                      | 135,049.70 | 100.00% | 2  | 2  | 2  | 0.02% | 2.33%  | LFVAQA 5.74<br>GGADPE<br>KFQGLIS<br>ELR | 2,346.25 |
| ATP | 6018 | COL18A1 protein                                  | gi 133778103,gi 134085613,gi 157742960                      | 135,049.70 | 100.00% | 2  | 2  | 2  | 0.02% | 2.33%  | LQDLYSI 2.96<br>VR                      | 1,106.62 |
| ATP | 6018 | NADH dehydrogenase                               | gi 256,gi 28461255,gi 400533,gi 73587329                    | 20,946.90  | 100.00% | 3  | 4  | 4  | 0.03% | 27.30% | AFDLLV 2.06<br>DRPVTL<br>VR             | 1,613.94 |
| ATP | 6018 | NADH dehydrogenase                               | gi 256,gi 28461255,gi 400533,gi 73587329                    | 20,946.90  | 100.00% | 3  | 4  | 4  | 0.03% | 27.30% | DYKVDQ 4.21<br>EIVNIHQE<br>R            | 1,861.97 |
| ATP | 6018 | NADH dehydrogenase                               | gi 256,gi 28461255,gi 400533,gi 73587329                    | 20,946.90  | 100.00% | 3  | 4  | 4  | 0.03% | 27.30% | TPAPSPQ 4.29<br>TSLPNPI<br>TYLTK        | 2,026.09 |
| ATP | 6018 | ribosomal protein L18                            | gi 59858459,gi 62752012,gi 75060915,gi 75775560,gi 89573893 | 21,518.10  | 100.00% | 3  | 3  | 7  | 0.06% | 18.10% | ILTFDQL 4.11<br>ALDSPK                  | 1,460.80 |
| ATP | 6018 | ribosomal protein L18                            | gi 59858459,gi 62752012,gi 75060915,gi 75775560,gi 89573893 | 21,518.10  | 100.00% | 3  | 3  | 7  | 0.06% | 18.10% | TNRPPLS 3.38<br>LSR                     | 1,140.65 |
| ATP | 6018 | ribosomal protein L18                            | gi 59858459,gi 62752012,gi 75060915,gi 75775560,gi 89573893 | 21,518.10  | 100.00% | 3  | 3  | 7  | 0.06% | 18.10% | TNSTFN 2.95<br>QVVLK                    | 1,250.67 |



|     |      |                                                                                                                                                                                                                                      |           |         |   |   |   |       |       |                         |          |
|-----|------|--------------------------------------------------------------------------------------------------------------------------------------------------------------------------------------------------------------------------------------|-----------|---------|---|---|---|-------|-------|-------------------------|----------|
| ATP | 6018 | RecName gi 1098919 : 34,gi 28461 Full=Isoc itrate gi 7358732 dehydrog 3 enase [NADP], mitochon drial; Short=ID H; AltName: Full=Oxa losuccina te decarbox ylase; AltName: Full=NA DP(+)- specific ICDH; AltName: Full=IDP ; AltName: | 50,807.00 | 100.00% | 3 | 4 | 4 | 0.03% | 8.85% | LIDDMV 3.48 AQLVK       | 1,260.69 |
| ATP | 6018 | RecName gi 1098919 : 34,gi 28461 Full=Isoc itrate gi 7358732 dehydrog 3 enase [NADP], mitochon drial; Short=ID H; AltName: Full=Oxa losuccina te decarbox ylase; AltName: Full=NA DP(+)- specific ICDH; AltName: Full=IDP ; AltName: | 50,807.00 | 100.00% | 3 | 4 | 4 | 0.03% | 8.85% | LNEHFL 4.42 NTSDFL DTIK | 1,906.95 |

|     |      |                                                                                                                                                                                                                                                                                                   |                                                                                                                                          |           |         |   |    |       |       |                       |                                         |          |
|-----|------|---------------------------------------------------------------------------------------------------------------------------------------------------------------------------------------------------------------------------------------------------------------------------------------------------|------------------------------------------------------------------------------------------------------------------------------------------|-----------|---------|---|----|-------|-------|-----------------------|-----------------------------------------|----------|
| ATP | 6018 | RecName<br>: gi 1098919<br>Full=Isoc<br>itrate gi 7358732<br>dehydrog<br>enase<br>[NADP],<br>mitochon<br>drial;<br>Short=ID<br>H;<br>AltName:<br>Full=Oxa<br>losuccina<br>te<br>decarbox<br>ylase;<br>AltName:<br>Full=NA<br>DP(+)-<br>specific<br>ICDH;<br>AltName:<br>Full=IDP<br>;<br>AltName: | 50,807.00                                                                                                                                | 100.00%   | 3       | 4 | 4  | 0.03% | 8.85% | TIEAEAA 4.2<br>HGTVTR | 1,355.69                                |          |
| ATP | 6018 | endotheli<br>n-<br>convertin<br>g enzyme                                                                                                                                                                                                                                                          | gi 1092971,<br>gi 1248291<br>88,gi 19035<br>9620,gi 229<br>9388,gi 229<br>9395,gi 307<br>94312,gi 53<br>5075,gi 688<br>290,gi 8976<br>02 | 85,603.70 | 100.00% | 8 | 14 | 23    | 0.20% | 16.20%                | AFEESLS 2.76<br>TLK                     | 1,124.58 |
| ATP | 6018 | endotheli<br>n-<br>convertin<br>g enzyme                                                                                                                                                                                                                                                          | gi 1092971,<br>gi 1248291<br>88,gi 19035<br>9620,gi 229<br>9388,gi 229<br>9395,gi 307<br>94312,gi 53<br>5075,gi 688<br>290,gi 8976<br>02 | 85,603.70 | 100.00% | 8 | 14 | 23    | 0.20% | 16.20%                | ELDKVF 5.28<br>NDYTAV<br>PDLYFE<br>NAMR | 2,666.24 |
| ATP | 6018 | endotheli<br>n-<br>convertin<br>g enzyme                                                                                                                                                                                                                                                          | gi 1092971,<br>gi 1248291<br>88,gi 19035<br>9620,gi 229<br>9388,gi 229<br>9395,gi 307<br>94312,gi 53<br>5075,gi 688<br>290,gi 8976<br>02 | 85,603.70 | 100.00% | 8 | 14 | 23    | 0.20% | 16.20%                | HTLGENI 4.15<br>ADNGGL<br>K             | 1,438.73 |
| ATP | 6018 | endotheli<br>n-<br>convertin<br>g enzyme                                                                                                                                                                                                                                                          | gi 1092971,<br>gi 1248291<br>88,gi 19035<br>9620,gi 229<br>9388,gi 229<br>9395,gi 307<br>94312,gi 53<br>5075,gi 688<br>290,gi 8976<br>02 | 85,603.70 | 100.00% | 8 | 14 | 23    | 0.20% | 16.20%                | NEIVFPA 4.99<br>GILQAPF<br>YTR          | 1,936.03 |

|     |      |                                         |                                                                                                                                          |           |         |   |    |    |       |        |                                             |      |          |
|-----|------|-----------------------------------------|------------------------------------------------------------------------------------------------------------------------------------------|-----------|---------|---|----|----|-------|--------|---------------------------------------------|------|----------|
| ATP | 6018 | endothelin-converting enzyme            | gi 1092971, gi 1248291, gi 19035, gi 9620, gi 229, gi 9388, gi 229, gi 9395, gi 307, gi 94312, gi 53, gi 5075, gi 688, gi 290, gi 897602 | 85,603.70 | 100.00% | 8 | 14 | 23 | 0.20% | 16.20% | SSPNAL<br>NFGGIG<br>VVGHE<br>LTHAFD<br>DQGR | 3.2  | 2,894.42 |
| ATP | 6018 | endothelin-converting enzyme            | gi 1092971, gi 1248291, gi 19035, gi 9620, gi 229, gi 9388, gi 229, gi 9395, gi 307, gi 94312, gi 53, gi 5075, gi 688, gi 290, gi 897602 | 85,603.70 | 100.00% | 8 | 14 | 23 | 0.20% | 16.20% | TPESSHE<br>GLITDPH<br>SPSR                  | 4.63 | 1,946.92 |
| ATP | 6018 | endothelin-converting enzyme            | gi 1092971, gi 1248291, gi 19035, gi 9620, gi 229, gi 9388, gi 229, gi 9395, gi 307, gi 94312, gi 53, gi 5075, gi 688, gi 290, gi 897602 | 85,603.70 | 100.00% | 8 | 14 | 23 | 0.20% | 16.20% | VFNDYT<br>AVPDLY<br>FENAMR                  | 2.96 | 2,181.00 |
| ATP | 6018 | endothelin-converting enzyme            | gi 1092971, gi 1248291, gi 19035, gi 9620, gi 229, gi 9388, gi 229, gi 9395, gi 307, gi 94312, gi 53, gi 5075, gi 688, gi 290, gi 897602 | 85,603.70 | 100.00% | 8 | 14 | 23 | 0.20% | 16.20% | VLTYGL<br>NYMVQL<br>GK                      | 3.88 | 1,614.86 |
| ATP | 6018 | RecName : Full=60S ribosomal protein L5 | gi 1088620, gi 56, gi 11990, gi 0687, gi 119, gi 905361, gi 6, gi 1552973, gi 75775327, gi 78369655                                      | 34,327.50 | 99.80%  | 2 | 3  | 3  | 0.03% | 8.75%  | GAVDGG<br>LSIPHST<br>K                      | 4.56 | 1,338.70 |
| ATP | 6018 | RecName : Full=60S ribosomal protein L5 | gi 1088620, gi 56, gi 11990, gi 0687, gi 119, gi 905361, gi 6, gi 1552973, gi 75775327, gi 78369655                                      | 34,327.50 | 99.80%  | 2 | 3  | 3  | 0.03% | 8.75%  | YLIEEDE<br>DAYKK                            | 2.77 | 1,515.72 |
| ATP | 6018 | hydroxycyl-Coenzyme A dehydrogenase     | gi 1140524, gi 68, gi 19467, gi 8883, gi 868, gi 21535                                                                                   | 34,251.40 | 99.80%  | 2 | 2  | 2  | 0.02% | 7.67%  | FAGLHFF<br>NPVPLM<br>K                      | 3.08 | 1,633.86 |
| ATP | 6018 | hydroxycyl-Coenzyme A dehydrogenase     | gi 1140524, gi 68, gi 19467, gi 8883, gi 868, gi 21535                                                                                   | 34,251.40 | 99.80%  | 2 | 2  | 2  | 0.02% | 7.67%  | TFESLLD<br>FSR                              | 2.9  | 1,214.61 |

|     |      |                                                  |                                                                          |            |         |   |   |   |       |        |                                  |      |          |
|-----|------|--------------------------------------------------|--------------------------------------------------------------------------|------------|---------|---|---|---|-------|--------|----------------------------------|------|----------|
| ATP | 6018 | secretory carrier membrane protein 3 isoform 1   | gi 61553277,gi 71649517,gi 73586519,gi 78369651                          | 38,348.80  | 99.80%  | 2 | 2 | 2 | 0.02% | 9.22%  | AQQEFA<br>AGVFSN<br>PAVR         | 2.98 | 1,691.85 |
| ATP | 6018 | secretory carrier membrane protein 3 isoform 1   | gi 61553277,gi 71649517,gi 73586519,gi 78369651                          | 38,348.80  | 99.80%  | 2 | 2 | 2 | 0.02% | 9.22%  | TAAANA<br>AAGAAE<br>NAFR         | 4.5  | 1,476.72 |
| ATP | 6018 | ANO10 protein                                    | gi 154425799,gi 156120985                                                | 76,294.20  | 99.70%  | 2 | 2 | 2 | 0.02% | 3.79%  | ETLENQ<br>NLYLVG<br>ASK          | 3.34 | 1,678.86 |
| ATP | 6018 | ANO10 protein                                    | gi 154425799,gi 156120985                                                | 76,294.20  | 99.70%  | 2 | 2 | 2 | 0.02% | 3.79%  | LEFESLE<br>ALK                   | 2.38 | 1,178.63 |
| ATP | 6018 | PREDICTED: similar to mannose receptor, C type 2 | gi 119912531                                                             | 166,060.80 | 99.80%  | 2 | 2 | 2 | 0.02% | 1.83%  | GTDVRE<br>PDVSPQ<br>GR           | 3.44 | 1,512.74 |
| ATP | 6018 | PREDICTED: similar to mannose receptor, C type 2 | gi 119912531                                                             | 166,060.80 | 99.80%  | 2 | 2 | 2 | 0.02% | 1.83%  | TLGDQL<br>SLLGG<br>R             | 3.33 | 1,342.77 |
| ATP | 6018 | PRKCD BP protein                                 | gi 133778193,gi 134085797,gi 187611336                                   | 27,468.60  | 100.00% | 4 | 6 | 9 | 0.08% | 17.70% | LATMLE<br>TLR                    | 2.69 | 1,063.58 |
| ATP | 6018 | PRKCD BP protein                                 | gi 133778193,gi 134085797,gi 187611336                                   | 27,468.60  | 100.00% | 4 | 6 | 9 | 0.08% | 17.70% | LEANHG<br>LLVAR                  | 3.11 | 1,192.68 |
| ATP | 6018 | PRKCD BP protein                                 | gi 133778193,gi 134085797,gi 187611336                                   | 27,468.60  | 100.00% | 4 | 6 | 9 | 0.08% | 17.70% | RIQSNLG<br>ALSR                  | 3.24 | 1,214.70 |
| ATP | 6018 | PRKCD BP protein                                 | gi 133778193,gi 134085797,gi 187611336                                   | 27,468.60  | 100.00% | 4 | 6 | 9 | 0.08% | 17.70% | SHDTTS<br>NTLAQL<br>LAK          | 5.99 | 1,599.83 |
| ATP | 6018 | SCAMP2 protein                                   | gi 151554759,gi 156120987                                                | 36,685.40  | 99.80%  | 2 | 2 | 2 | 0.02% | 9.76%  | ELQNTV<br>ANLHVR                 | 2.08 | 1,393.75 |
| ATP | 6018 | SCAMP2 protein                                   | gi 151554759,gi 156120987                                                | 36,685.40  | 99.80%  | 2 | 2 | 2 | 0.02% | 9.76%  | TGASFQ<br>QAQEEF<br>SQGIFSS<br>R | 4.2  | 2,205.02 |
| ATP | 6018 | vacuolar system associated protein-60            | gi 121574634,gi 152941134,gi 2493459,gi 33340013,gi 41386727,gi 74356454 | 60,133.40  | 99.80%  | 2 | 3 | 5 | 0.04% | 4.50%  | SLEDQV<br>EVLV                   | 3.63 | 1,187.63 |
| ATP | 6018 | vacuolar system associated protein-60            | gi 121574634,gi 152941134,gi 2493459,gi 33340013,gi 41386727,gi 74356454 | 60,133.40  | 99.80%  | 2 | 3 | 5 | 0.04% | 4.50%  | TLKEEA<br>EKPEEA<br>AK           | 2.45 | 1,572.81 |

|     |      |                                                           |                                                                                                             |           |         |    |    |     |       |        |                       |          |
|-----|------|-----------------------------------------------------------|-------------------------------------------------------------------------------------------------------------|-----------|---------|----|----|-----|-------|--------|-----------------------|----------|
| ATP | 6018 | PREDIC TED: similar to Histone H4 replacem ent CG3379- PC | gi 1199157 09,gi 11991 5719,gi 119 915738,gi 7 6613952,gi  76616306,g i 76631252, gi 7663126 2,gi 766317 17 | 11,349.70 | 100.00% | 11 | 16 | 147 | 1.26% | 56.30% | DAVTTYT 2.97 EHAK     | 1,134.54 |
| ATP | 6018 | PREDIC TED: similar to Histone H4 replacem ent CG3379- PC | gi 1199157 09,gi 11991 5719,gi 119 915738,gi 7 6613952,gi  76616306,g i 76631252, gi 7663126 2,gi 766317 17 | 11,349.70 | 100.00% | 11 | 16 | 147 | 1.26% | 56.30% | DNIQGIT 2.84 KPAIR    | 1,325.75 |
| ATP | 6018 | PREDIC TED: similar to Histone H4 replacem ent CG3379- PC | gi 1199157 09,gi 11991 5719,gi 119 915738,gi 7 6613952,gi  76616306,g i 76631252, gi 7663126 2,gi 766317 17 | 11,349.70 | 100.00% | 11 | 16 | 147 | 1.26% | 56.30% | DNIQGIT 2.71 KPAIRR   | 1,481.85 |
| ATP | 6018 | PREDIC TED: similar to Histone H4 replacem ent CG3379- PC | gi 1199157 09,gi 11991 5719,gi 119 915738,gi 7 6613952,gi  76616306,g i 76631252, gi 7663126 2,gi 766317 17 | 11,349.70 | 100.00% | 11 | 16 | 147 | 1.26% | 56.30% | ISGLIYE 4.16 ETR      | 1,180.62 |
| ATP | 6018 | PREDIC TED: similar to Histone H4 replacem ent CG3379- PC | gi 1199157 09,gi 11991 5719,gi 119 915738,gi 7 6613952,gi  76616306,g i 76631252, gi 7663126 2,gi 766317 17 | 11,349.70 | 100.00% | 11 | 16 | 147 | 1.26% | 56.30% | KTVTAM 5.03 DVVYAL K  | 1,454.79 |
| ATP | 6018 | PREDIC TED: similar to Histone H4 replacem ent CG3379- PC | gi 1199157 09,gi 11991 5719,gi 119 915738,gi 7 6613952,gi  76616306,g i 76631252, gi 7663126 2,gi 766317 17 | 11,349.70 | 100.00% | 11 | 16 | 147 | 1.26% | 56.30% | KTVTAM 4.35 DVVYAL KR | 1,610.89 |
| ATP | 6018 | PREDIC TED: similar to Histone H4 replacem ent CG3379- PC | gi 1199157 09,gi 11991 5719,gi 119 915738,gi 7 6613952,gi  76616306,g i 76631252, gi 7663126 2,gi 766317 17 | 11,349.70 | 100.00% | 11 | 16 | 147 | 1.26% | 56.30% | TVTAMD 4.4 VVYALK     | 1,310.70 |



|     |      |                                                     |                  |           |         |    |    |    |       |        |                                                    |          |
|-----|------|-----------------------------------------------------|------------------|-----------|---------|----|----|----|-------|--------|----------------------------------------------------|----------|
| ATP | 6018 | inner<br>membran<br>e protein,<br>mitochon<br>drial | gi 1529412<br>06 | 83,035.60 | 100.00% | 14 | 16 | 23 | 0.20% | 28.00% | AVDEAA 2.97<br>DALLK                               | 1,115.59 |
| ATP | 6018 | inner<br>membran<br>e protein,<br>mitochon<br>drial | gi 1529412<br>06 | 83,035.60 | 100.00% | 14 | 16 | 23 | 0.20% | 28.00% | ELDSITP 3.76<br>EVLPGW<br>K                        | 1,583.83 |
| ATP | 6018 | inner<br>membran<br>e protein,<br>mitochon<br>drial | gi 1529412<br>06 | 83,035.60 | 100.00% | 14 | 16 | 23 | 0.20% | 28.00% | KVEEVR 2.06<br>DAMENE<br>MR                        | 1,751.81 |
| ATP | 6018 | inner<br>membran<br>e protein,<br>mitochon<br>drial | gi 1529412<br>06 | 83,035.60 | 100.00% | 14 | 16 | 23 | 0.20% | 28.00% | LAEQEL 2.69<br>QFR                                 | 1,133.60 |
| ATP | 6018 | inner<br>membran<br>e protein,<br>mitochon<br>drial | gi 1529412<br>06 | 83,035.60 | 100.00% | 14 | 16 | 23 | 0.20% | 28.00% | MKTASA 3.7<br>DLPTVPL<br>GSAVEAI<br>R              | 2,143.14 |
| ATP | 6018 | inner<br>membran<br>e protein,<br>mitochon<br>drial | gi 1529412<br>06 | 83,035.60 | 100.00% | 14 | 16 | 23 | 0.20% | 28.00% | QHIALAL 4.19<br>EK                                 | 1,022.60 |
| ATP | 6018 | inner<br>membran<br>e protein,<br>mitochon<br>drial | gi 1529412<br>06 | 83,035.60 | 100.00% | 14 | 16 | 23 | 0.20% | 28.00% | QKGDTS 2.36<br>ASTTAG<br>DTLSVP<br>APVVQH<br>EELIK | 2,979.53 |
| ATP | 6018 | inner<br>membran<br>e protein,<br>mitochon<br>drial | gi 1529412<br>06 | 83,035.60 | 100.00% | 14 | 16 | 23 | 0.20% | 28.00% | SEIQAEQ 2.38<br>DRKVEE<br>VR                       | 1,815.92 |
| ATP | 6018 | inner<br>membran<br>e protein,<br>mitochon<br>drial | gi 1529412<br>06 | 83,035.60 | 100.00% | 14 | 16 | 23 | 0.20% | 28.00% | SVIENAK 2.63<br>KEEVAG<br>AK                       | 1,572.86 |
| ATP | 6018 | inner<br>membran<br>e protein,<br>mitochon<br>drial | gi 1529412<br>06 | 83,035.60 | 100.00% | 14 | 16 | 23 | 0.20% | 28.00% | TASADL 4.49<br>PTVPLGS<br>AVEAIR                   | 1,868.01 |
| ATP | 6018 | inner<br>membran<br>e protein,<br>mitochon<br>drial | gi 1529412<br>06 | 83,035.60 | 100.00% | 14 | 16 | 23 | 0.20% | 28.00% | TDHPET 4.66<br>GEGKPK<br>PATSEEA<br>SSTSVR         | 2,598.23 |
| ATP | 6018 | inner<br>membran<br>e protein,<br>mitochon<br>drial | gi 1529412<br>06 | 83,035.60 | 100.00% | 14 | 16 | 23 | 0.20% | 28.00% | TIPYSDK 2.94<br>LFEMVL<br>GSPPYT<br>VPLPK          | 2,708.43 |
| ATP | 6018 | inner<br>membran<br>e protein,<br>mitochon<br>drial | gi 1529412<br>06 | 83,035.60 | 100.00% | 14 | 16 | 23 | 0.20% | 28.00% | VQEQL 2.93<br>KYEFEQ<br>DLSEKL<br>AEQLQ<br>FR      | 3,256.60 |
| ATP | 6018 | inner<br>membran<br>e protein,<br>mitochon<br>drial | gi 1529412<br>06 | 83,035.60 | 100.00% | 14 | 16 | 23 | 0.20% | 28.00% | VVSQYH 4.27<br>ELVVQA<br>R                         | 1,527.83 |

|     |      |                                              |                                                             |           |         |    |    |     |       |        |                                               |          |
|-----|------|----------------------------------------------|-------------------------------------------------------------|-----------|---------|----|----|-----|-------|--------|-----------------------------------------------|----------|
| ATP | 6018 | SCARB2 protein                               | gi 151556135,gi 156120953                                   | 53,968.70 | 100.00% | 3  | 3  | 3   | 0.03% | 10.30% | GQGSTD 2.13<br>EGTADE<br>RAPLIR               | 1,872.90 |
| ATP | 6018 | SCARB2 protein                               | gi 151556135,gi 156120953                                   | 53,968.70 | 100.00% | 3  | 3  | 3   | 0.03% | 10.30% | HDVSPY 3.18<br>FGLFYG<br>K                    | 1,529.74 |
| ATP | 6018 | SCARB2 protein                               | gi 151556135,gi 156120953                                   | 53,968.70 | 100.00% | 3  | 3  | 3   | 0.03% | 10.30% | NGAPIIM 3.14<br>SFPHFYQ<br>ADEK               | 2,080.98 |
| ATP | 6018 | Endoplasmic reticulum protein                | gi 109658363,gi 115495555,gi 14381138729                    | 28,789.90 | 100.00% | 3  | 3  | 3   | 0.03% | 14.30% | GALPLD 2.63<br>TITFYK                         | 1,338.73 |
| ATP | 6018 | Endoplasmic reticulum protein                | gi 109658363,gi 115495555,gi 14381138729                    | 28,789.90 | 100.00% | 3  | 3  | 3   | 0.03% | 14.30% | ILDQGE 4.04<br>DFPASE<br>MTR                  | 1,724.78 |
| ATP | 6018 | Endoplasmic reticulum protein                | gi 109658363,gi 115495555,gi 14381138729                    | 28,789.90 | 100.00% | 3  | 3  | 3   | 0.03% | 14.30% | SLNILTA 3.13<br>FQK                           | 1,134.65 |
| ATP | 6018 | ATAD1 protein                                | gi 154426126,gi 76671592                                    | 41,750.40 | 99.80%  | 2  | 3  | 4   | 0.03% | 11.40% | EYVNST 4.39<br>SEESH<br>EDEIRPV<br>QQDLH<br>R | 3,140.42 |
| ATP | 6018 | ATAD1 protein                                | gi 154426126,gi 76671592                                    | 41,750.40 | 99.80%  | 2  | 3  | 4   | 0.03% | 11.40% | LQPSIIFI 3.22<br>DEIDSFL<br>R                 | 1,906.03 |
| ATP | 6018 | Mitochondrial carrier homolog 2 (C. elegans) | gi 151554706,gi 28603744,gi 59858227,gi 67461083,gi 7959093 | 33,276.60 | 100.00% | 3  | 5  | 6   | 0.05% | 13.50% | GLFTGL 2.4<br>TPR                             | 961.5467 |
| ATP | 6018 | Mitochondrial carrier homolog 2 (C. elegans) | gi 151554706,gi 28603744,gi 59858227,gi 67461083,gi 7959093 | 33,276.60 | 100.00% | 3  | 5  | 6   | 0.05% | 13.50% | SAATLIT 3.65<br>HPFHVIT<br>LR                 | 1,777.01 |
| ATP | 6018 | Mitochondrial carrier homolog 2 (C. elegans) | gi 151554706,gi 28603744,gi 59858227,gi 67461083,gi 7959093 | 33,276.60 | 100.00% | 3  | 5  | 6   | 0.05% | 13.50% | VLIQVG 4.48<br>YEPLAPT<br>VGR                 | 1,711.97 |
| ATP | 6018 | PREDICTED: similar to cytoskeletal protein 4 | gi 119892686                                                | 64,511.50 | 100.00% | 29 | 44 | 101 | 0.86% | 46.50% | AAALRP 3.3<br>EEDGAF<br>RPSEAFE<br>TLQK       | 2,533.27 |
| ATP | 6018 | PREDICTED: similar to cytoskeletal protein 4 | gi 119892686                                                | 64,511.50 | 100.00% | 29 | 44 | 101 | 0.86% | 46.50% | AEESAA 3.88<br>HLPEEIR                        | 1,451.71 |



|     |      |                                                     |            |           |         |    |    |     |       |        |                    |      |          |
|-----|------|-----------------------------------------------------|------------|-----------|---------|----|----|-----|-------|--------|--------------------|------|----------|
| ATP | 6018 | PREDIC TED: 86<br>similar to cytoskeletal protein 4 | gi 1198926 | 64,511.50 | 100.00% | 29 | 44 | 101 | 0.86% | 46.50% | AEESAA HLPEEIR R   | 2.64 | 1,607.81 |
| ATP | 6018 | PREDIC TED: 86<br>similar to cytoskeletal protein 4 | gi 1198926 | 64,511.50 | 100.00% | 29 | 44 | 101 | 0.86% | 46.50% | ASVGQV ESDLK       | 3.55 | 1,132.58 |
| ATP | 6018 | PREDIC TED: 86<br>similar to cytoskeletal protein 4 | gi 1198926 | 64,511.50 | 100.00% | 29 | 44 | 101 | 0.86% | 46.50% | DLSDGIH VVK        | 2.89 | 1,082.58 |
| ATP | 6018 | PREDIC TED: 86<br>similar to cytoskeletal protein 4 | gi 1198926 | 64,511.50 | 100.00% | 29 | 44 | 101 | 0.86% | 46.50% | EAADSE HHTLQA LTEK | 4.4  | 1,779.85 |
| ATP | 6018 | PREDIC TED: 86<br>similar to cytoskeletal protein 4 | gi 1198926 | 64,511.50 | 100.00% | 29 | 44 | 101 | 0.86% | 46.50% | EELGQG LQVVEQ K    | 3.31 | 1,414.72 |
| ATP | 6018 | PREDIC TED: 86<br>similar to cytoskeletal protein 4 | gi 1198926 | 64,511.50 | 100.00% | 29 | 44 | 101 | 0.86% | 46.50% | ELVSLK QEQQR       | 3.1  | 1,357.74 |
| ATP | 6018 | PREDIC TED: 86<br>similar to cytoskeletal protein 4 | gi 1198926 | 64,511.50 | 100.00% | 29 | 44 | 101 | 0.86% | 46.50% | ERDFTSL ENTVEE R   | 4.11 | 1,724.81 |
| ATP | 6018 | PREDIC TED: 86<br>similar to cytoskeletal protein 4 | gi 1198926 | 64,511.50 | 100.00% | 29 | 44 | 101 | 0.86% | 46.50% | EVVKEI QTSVK       | 3.04 | 1,259.72 |

|     |      |                                                     |            |           |         |    |    |     |       |        |                      |      |          |
|-----|------|-----------------------------------------------------|------------|-----------|---------|----|----|-----|-------|--------|----------------------|------|----------|
| ATP | 6018 | PREDIC TED: 86<br>similar to cytoskeletal protein 4 | gi 1198926 | 64,511.50 | 100.00% | 29 | 44 | 101 | 0.86% | 46.50% | FKEAAD SEHHTL QALTEK | 3.66 | 2,055.01 |
| ATP | 6018 | PREDIC TED: 86<br>similar to cytoskeletal protein 4 | gi 1198926 | 64,511.50 | 100.00% | 29 | 44 | 101 | 0.86% | 46.50% | GLGEAQ LSLAGD VDELK  | 5.25 | 1,714.89 |
| ATP | 6018 | PREDIC TED: 86<br>similar to cytoskeletal protein 4 | gi 1198926 | 64,511.50 | 100.00% | 29 | 44 | 101 | 0.86% | 46.50% | GLGEAQ LSLAGD VDELKR | 4.04 | 1,870.99 |
| ATP | 6018 | PREDIC TED: 86<br>similar to cytoskeletal protein 4 | gi 1198926 | 64,511.50 | 100.00% | 29 | 44 | 101 | 0.86% | 46.50% | GLGEAQ LSLAGD VDELKR | 2.23 | 2,027.09 |
| ATP | 6018 | PREDIC TED: 86<br>similar to cytoskeletal protein 4 | gi 1198926 | 64,511.50 | 100.00% | 29 | 44 | 101 | 0.86% | 46.50% | GLLEDL RNDLDR        | 2.24 | 1,428.74 |
| ATP | 6018 | PREDIC TED: 86<br>similar to cytoskeletal protein 4 | gi 1198926 | 64,511.50 | 100.00% | 29 | 44 | 101 | 0.86% | 46.50% | GLLEDL RNDLDR LFVK   | 2.57 | 1,916.06 |
| ATP | 6018 | PREDIC TED: 86<br>similar to cytoskeletal protein 4 | gi 1198926 | 64,511.50 | 100.00% | 29 | 44 | 101 | 0.86% | 46.50% | IETNENN LESAK        | 3.44 | 1,361.65 |
| ATP | 6018 | PREDIC TED: 86<br>similar to cytoskeletal protein 4 | gi 1198926 | 64,511.50 | 100.00% | 29 | 44 | 101 | 0.86% | 46.50% | ILRAEES AAHLPE EIR   | 3.49 | 1,833.98 |

|     |      |                                                     |            |           |         |    |    |     |       |        |                     |      |          |
|-----|------|-----------------------------------------------------|------------|-----------|---------|----|----|-----|-------|--------|---------------------|------|----------|
| ATP | 6018 | PREDIC TED: 86<br>similar to cytoskeletal protein 4 | gi 1198926 | 64,511.50 | 100.00% | 29 | 44 | 101 | 0.86% | 46.50% | LEEELG QLK          | 3.49 | 1,058.57 |
| ATP | 6018 | PREDIC TED: 86<br>similar to cytoskeletal protein 4 | gi 1198926 | 64,511.50 | 100.00% | 29 | 44 | 101 | 0.86% | 46.50% | LQNEILK DLSDGIH VVK | 4.89 | 1,921.08 |
| ATP | 6018 | PREDIC TED: 86<br>similar to cytoskeletal protein 4 | gi 1198926 | 64,511.50 | 100.00% | 29 | 44 | 101 | 0.86% | 46.50% | LQSVED GVQAAR       | 3.69 | 1,272.65 |
| ATP | 6018 | PREDIC TED: 86<br>similar to cytoskeletal protein 4 | gi 1198926 | 64,511.50 | 100.00% | 29 | 44 | 101 | 0.86% | 46.50% | QREELG QGLQGV EQK   | 5.46 | 1,698.88 |
| ATP | 6018 | PREDIC TED: 86<br>similar to cytoskeletal protein 4 | gi 1198926 | 64,511.50 | 100.00% | 29 | 44 | 101 | 0.86% | 46.50% | RLEEEL GQLK         | 3.46 | 1,214.67 |
| ATP | 6018 | PREDIC TED: 86<br>similar to cytoskeletal protein 4 | gi 1198926 | 64,511.50 | 100.00% | 29 | 44 | 101 | 0.86% | 46.50% | SINDNIAI FTDVQK     | 5.23 | 1,577.82 |
| ATP | 6018 | PREDIC TED: 86<br>similar to cytoskeletal protein 4 | gi 1198926 | 64,511.50 | 100.00% | 29 | 44 | 101 | 0.86% | 46.50% | SINDNIAI FTDVQK R   | 2.93 | 1,733.92 |
| ATP | 6018 | PREDIC TED: 86<br>similar to cytoskeletal protein 4 | gi 1198926 | 64,511.50 | 100.00% | 29 | 44 | 101 | 0.86% | 46.50% | STIQTME SDVYTE VK   | 3.59 | 1,746.81 |

|     |      |                                                                |                                                                            |           |         |    |    |     |       |        |                                       |          |
|-----|------|----------------------------------------------------------------|----------------------------------------------------------------------------|-----------|---------|----|----|-----|-------|--------|---------------------------------------|----------|
| ATP | 6018 | PREDIC TED: 86<br>similar to cytoskeleton-associated protein 4 | gi 1198926                                                                 | 64,511.50 | 100.00% | 29 | 44 | 101 | 0.86% | 46.50% | TAVDSL 3.48<br>VAYSVK                 | 1,252.68 |
| ATP | 6018 | PREDIC TED: 86<br>similar to cytoskeleton-associated protein 4 | gi 1198926                                                                 | 64,511.50 | 100.00% | 29 | 44 | 101 | 0.86% | 46.50% | VQEQVH 4.22<br>TLLGR                  | 1,279.71 |
| ATP | 6018 | PREDIC TED: 86<br>similar to cytoskeleton-associated protein 4 | gi 1198926                                                                 | 64,511.50 | 100.00% | 29 | 44 | 101 | 0.86% | 46.50% | VQSLQA 4.13<br>TFGTFES<br>LVR         | 1,782.94 |
| ATP | 6018 | TMED7 protein 46,gi 157428116                                  | gi 1340252                                                                 | 25,318.00 | 100.00% | 3  | 4  | 5   | 0.04% | 20.40% | KQYDSY 3.65<br>TFTASK                 | 1,438.68 |
| ATP | 6018 | TMED7 protein 46,gi 157428116                                  | gi 1340252                                                                 | 25,318.00 | 100.00% | 3  | 4  | 5   | 0.04% | 20.40% | LEDPDG 2.74<br>NVLYKE<br>MKK          | 1,794.89 |
| ATP | 6018 | TMED7 protein 46,gi 157428116                                  | gi 1340252                                                                 | 25,318.00 | 100.00% | 3  | 4  | 5   | 0.04% | 20.40% | TVYFDF 2.04<br>QVGEDP<br>PLFPSEN<br>R | 2,357.11 |
| ATP | 6018 | similar to peptidylprolyl isomerase 300 A (cyclophilin A)      | gi 2818977<br>1,gi 587604<br>24,gi 75948                                   | 17,851.80 | 100.00% | 4  | 5  | 5   | 0.04% | 16.50% | FDDENFI 2.52<br>LK                    | 1,140.56 |
| ATP | 6018 | similar to peptidylprolyl isomerase 300 A (cyclophilin A)      | gi 2818977<br>1,gi 587604<br>24,gi 75948                                   | 17,851.80 | 100.00% | 4  | 5  | 5   | 0.04% | 16.50% | SIYGKFK 4.12<br>DDENFIL<br>K          | 1,817.90 |
| ATP | 6018 | similar to peptidylprolyl isomerase 300 A (cyclophilin A)      | gi 2818977<br>1,gi 587604<br>24,gi 75948                                   | 17,851.80 | 100.00% | 4  | 5  | 5   | 0.04% | 16.50% | VSFELFA 2.37<br>DK                    | 1,055.54 |
| ATP | 6018 | similar to peptidylprolyl isomerase 300 A (cyclophilin A)      | gi 2818977<br>1,gi 587604<br>24,gi 75948                                   | 17,851.80 | 100.00% | 4  | 5  | 5   | 0.04% | 16.50% | VSFELFA 2.66<br>DKVPK                 | 1,379.76 |
| ATP | 6018 | Clusterin                                                      | gi 1099399<br>36,gi 116530,gi 146231734,gi 151555910,gi 163115,gi 27806907 | 51,096.70 | 100.00% | 4  | 4  | 4   | 0.03% | 15.30% | KLLSSSL 3.06<br>EEAKK                 | 1,358.83 |

|     |      |                |                                                                                                |           |         |    |    |    |       |        |                                                    |          |
|-----|------|----------------|------------------------------------------------------------------------------------------------|-----------|---------|----|----|----|-------|--------|----------------------------------------------------|----------|
| ATP | 6018 | Clusterin      | gi 1099399<br>36,gi 11653<br>0,gi 146231<br>734,gi 1515<br>55910,gi 16<br>3115,gi 278<br>06907 | 51,096.70 | 100.00% | 4  | 4  | 4  | 0.03% | 15.30% | LFNSFPI 3.3<br>TVTVPQ<br>EVSSPNF<br>MENVAE<br>K    | 3,040.50 |
| ATP | 6018 | Clusterin      | gi 1099399<br>36,gi 11653<br>0,gi 146231<br>734,gi 1515<br>55910,gi 16<br>3115,gi 278<br>06907 | 51,096.70 | 100.00% | 4  | 4  | 4  | 0.03% | 15.30% | LYDQLL 4.06<br>QSYQQK                              | 1,526.79 |
| ATP | 6018 | Clusterin      | gi 1099399<br>36,gi 11653<br>0,gi 146231<br>734,gi 1515<br>55910,gi 16<br>3115,gi 278<br>06907 | 51,096.70 | 100.00% | 4  | 4  | 4  | 0.03% | 15.30% | RPQDTQ 3.42<br>YYSFSS<br>FPR                       | 1,975.93 |
| ATP | 6018 | Prohibiti<br>n | gi 7435452<br>7,gi 777360<br>91,gi 88909<br>243                                                | 29,786.60 | 100.00% | 11 | 14 | 32 | 0.27% | 58.50% | AAELIAN 4.01<br>SLATAG<br>DGLIELR                  | 1,998.09 |
| ATP | 6018 | Prohibiti<br>n | gi 7435452<br>7,gi 777360<br>91,gi 88909<br>243                                                | 29,786.60 | 100.00% | 11 | 14 | 32 | 0.27% | 58.50% | AATFGLI 2.24<br>LDDVSL<br>THLTFG<br>K              | 2,119.14 |
| ATP | 6018 | Prohibiti<br>n | gi 7435452<br>7,gi 777360<br>91,gi 88909<br>243                                                | 29,786.60 | 100.00% | 11 | 14 | 32 | 0.27% | 58.50% | AATFGLI 3.61<br>LDDVSL<br>THLTFG<br>KEFTEA<br>VEAK | 3,123.63 |
| ATP | 6018 | Prohibiti<br>n | gi 7435452<br>7,gi 777360<br>91,gi 88909<br>243                                                | 29,786.60 | 100.00% | 11 | 14 | 32 | 0.27% | 58.50% | DLQNVN 3.95<br>ITLR                                | 1,185.66 |
| ATP | 6018 | Prohibiti<br>n | gi 7435452<br>7,gi 777360<br>91,gi 88909<br>243                                                | 29,786.60 | 100.00% | 11 | 14 | 32 | 0.27% | 58.50% | FDAGELI 3.76<br>TQR                                | 1,149.59 |
| ATP | 6018 | Prohibiti<br>n | gi 7435452<br>7,gi 777360<br>91,gi 88909<br>243                                                | 29,786.60 | 100.00% | 11 | 14 | 32 | 0.27% | 58.50% | FGLALA 3.99<br>VAGGVV<br>NSALYN<br>VDAGHR          | 2,371.25 |
| ATP | 6018 | Prohibiti<br>n | gi 7435452<br>7,gi 777360<br>91,gi 88909<br>243                                                | 29,786.60 | 100.00% | 11 | 14 | 32 | 0.27% | 58.50% | IFTSIGE 3.42<br>DYDER                              | 1,444.66 |
| ATP | 6018 | Prohibiti<br>n | gi 7435452<br>7,gi 777360<br>91,gi 88909<br>243                                                | 29,786.60 | 100.00% | 11 | 14 | 32 | 0.27% | 58.50% | ILFRPVA 3.05<br>SQLPR                              | 1,396.84 |
| ATP | 6018 | Prohibiti<br>n | gi 7435452<br>7,gi 777360<br>91,gi 88909<br>243                                                | 29,786.60 | 100.00% | 11 | 14 | 32 | 0.27% | 58.50% | KLEAAE 4.36<br>DIAYQLS<br>R                        | 1,606.84 |
| ATP | 6018 | Prohibiti<br>n | gi 7435452<br>7,gi 777360<br>91,gi 88909<br>243                                                | 29,786.60 | 100.00% | 11 | 14 | 32 | 0.27% | 58.50% | NITYLPA 4.55<br>QQSVLL<br>QLPQ                     | 1,855.03 |
| ATP | 6018 | Prohibiti<br>n | gi 7435452<br>7,gi 777360<br>91,gi 88909<br>243                                                | 29,786.60 | 100.00% | 11 | 14 | 32 | 0.27% | 58.50% | VLPSITT 2.41<br>EILK                               | 1,213.74 |

|     |      |                                                   |                                                                                                                                          |           |         |   |   |   |       |        |                               |          |
|-----|------|---------------------------------------------------|------------------------------------------------------------------------------------------------------------------------------------------|-----------|---------|---|---|---|-------|--------|-------------------------------|----------|
| ATP | 6018 | ras-related C3 botulinum toxin substrate 1        | gi 27806443,gi 51702785,gi 6007014,gi 73587375                                                                                           | 21,432.60 | 99.90%  | 2 | 3 | 3 | 0.03% | 7.81%  | KLTPITY 2.86<br>PQGLAM<br>AK  | 1,647.91 |
| ATP | 6018 | ras-related C3 botulinum toxin substrate 1        | gi 27806443,gi 51702785,gi 6007014,gi 73587375                                                                                           | 21,432.60 | 99.90%  | 2 | 3 | 3 | 0.03% | 7.81%  | LTPITYP 3.36<br>QGLAMA<br>K   | 1,519.82 |
| ATP | 6018 | heterogeneous nuclear ribonucleoprotein D         | gi 146231918,gi 148230364,gi 148878011                                                                                                   | 32,830.70 | 99.80%  | 2 | 2 | 2 | 0.02% | 7.19%  | GFGFVL 2.37<br>FK             | 914.5135 |
| ATP | 6018 | heterogeneous nuclear ribonucleoprotein D         | gi 146231918,gi 148230364,gi 148878011                                                                                                   | 32,830.70 | 99.80%  | 2 | 2 | 2 | 0.02% | 7.19%  | IFVGGLS 4.1<br>PDTPEE<br>K    | 1,488.76 |
| ATP | 6018 | Interferon induced transmembrane protein 1 (9-27) | gi 112362418,gi 118151192,gi 118151350,gi 18151354,gi 119919513,gi 14279576,gi 14279578,gi 148744152,gi 32480628,gi 73586549,gi 73587371 | 13,631.00 | 99.80%  | 2 | 3 | 5 | 0.04% | 13.70% | KMVGDI 5.2<br>TGAQSY<br>ASTAK | 1,743.86 |
| ATP | 6018 | Interferon induced transmembrane protein 1 (9-27) | gi 112362418,gi 118151192,gi 118151350,gi 18151354,gi 119919513,gi 14279576,gi 14279578,gi 148744152,gi 32480628,gi 73586549,gi 73587371 | 13,631.00 | 99.80%  | 2 | 3 | 5 | 0.04% | 13.70% | MVGDIT 5.1<br>GAQSYA<br>STAK  | 1,615.76 |
| ATP | 6018 | RecName: Full=Histone H1.1; AltName: Full=CT L-1  | gi 121903                                                                                                                                | 10,347.40 | 100.00% | 5 | 6 | 8 | 0.07% | 51.00% | ALAAAG 3.08<br>YDVEK          | 1,107.57 |

|     |      |                                                                                            |           |         |   |   |   |       |        |                                           |          |
|-----|------|--------------------------------------------------------------------------------------------|-----------|---------|---|---|---|-------|--------|-------------------------------------------|----------|
| ATP | 6018 | RecName gi 121903 :<br>Full=Histone H1.1;<br>AltName: Full=CT L-1                          | 10,347.40 | 100.00% | 5 | 6 | 8 | 0.07% | 51.00% | ALAAAG 4.78<br>YDVEKN<br>NSR              | 1,578.79 |
| ATP | 6018 | RecName gi 121903 :<br>Full=Histone H1.1;<br>AltName: Full=CT L-1                          | 10,347.40 | 100.00% | 5 | 6 | 8 | 0.07% | 51.00% | ASGPPV 2.97<br>SELITK                     | 1,198.67 |
| ATP | 6018 | RecName gi 121903 :<br>Full=Histone H1.1;<br>AltName: Full=CT L-1                          | 10,347.40 | 100.00% | 5 | 6 | 8 | 0.07% | 51.00% | SETAPA 3.46<br>APAAAP<br>PAEK             | 1,478.75 |
| ATP | 6018 | RecName gi 121903 :<br>Full=Histone H1.1;<br>AltName: Full=CT L-1                          | 10,347.40 | 100.00% | 5 | 6 | 8 | 0.07% | 51.00% | SGVSLA 2.89<br>ALKK                       | 973.6041 |
| ATP | 6018 | GNAS complex locus gi 1139122 07,gi 74268 384                                              | 45,691.40 | 100.00% | 5 | 5 | 6 | 0.05% | 23.40% | ILHVNGF 5.69<br>NGEGGE<br>EDPQAA<br>R     | 2,110.00 |
| ATP | 6018 | GNAS complex locus gi 1139122 07,gi 74268 384                                              | 45,691.40 | 100.00% | 5 | 5 | 6 | 0.05% | 23.40% | LLLLGA 3.63<br>GESGK                      | 1,057.63 |
| ATP | 6018 | GNAS complex locus gi 1139122 07,gi 74268 384                                              | 45,691.40 | 100.00% | 5 | 5 | 6 | 0.05% | 23.40% | SKIEDYF 2.43<br>PEFAR                     | 1,501.73 |
| ATP | 6018 | GNAS complex locus gi 1139122 07,gi 74268 384                                              | 45,691.40 | 100.00% | 5 | 5 | 6 | 0.05% | 23.40% | VDYILSV 3.14<br>MNVPDF<br>DFPPEFY<br>EHAK | 2,888.35 |
| ATP | 6018 | GNAS complex locus gi 1139122 07,gi 74268 384                                              | 45,691.40 | 100.00% | 5 | 5 | 6 | 0.05% | 23.40% | YFIRDEF 2.1<br>LR                         | 1,258.66 |
| ATP | 6018 | GNAS complex locus gi 1139122 07,gi 74268 384                                              | 45,691.40 | 100.00% | 5 | 5 | 6 | 0.05% | 23.40% | YTTPED 3.16<br>ATPEPG<br>EDPR             | 1,774.78 |
| ATP | 6018 | PREDIC TED: 15<br>similar to Transmembrane 9 superfamily member 2 precursor (p76), partial | 72,962.00 | 99.80%  | 2 | 2 | 3 | 0.03% | 4.40%  | IYYHVV 3.65<br>ETGSMG<br>AR               | 1,598.76 |

|     |      |                                                                                                                                                                                                                                                                  |                                                                   |           |         |   |   |   |       |        |                                   |      |          |
|-----|------|------------------------------------------------------------------------------------------------------------------------------------------------------------------------------------------------------------------------------------------------------------------|-------------------------------------------------------------------|-----------|---------|---|---|---|-------|--------|-----------------------------------|------|----------|
| ATP | 6018 | PREDIC TED: 15<br>similar to<br>Transmembrane 9<br>superfamily<br>member 2<br>precursor (p76),<br>partial                                                                                                                                                        | gi 1946719                                                        | 72,962.00 | 99.80%  | 2 | 2 | 3 | 0.03% | 4.40%  | RPSENL<br>GQVLFG<br>ER            | 3.84 | 1,601.84 |
| ATP | 6018 | interferon stimulate d gene 17 83<br>[Ovis aries]                                                                                                                                                                                                                | gi 1208240<br>2,gi 576191                                         | 17,482.10 | 100.00% | 4 | 4 | 4 | 0.03% | 33.10% | EVLQEG<br>VPLVHQ<br>GLK           | 3.43 | 1,645.93 |
| ATP | 6018 | interferon stimulate d gene 17 83<br>[Ovis aries]                                                                                                                                                                                                                | gi 1208240<br>2,gi 576191                                         | 17,482.10 | 100.00% | 4 | 4 | 4 | 0.03% | 33.10% | INVPAFQ<br>QR                     | 2.89 | 1,072.59 |
| ATP | 6018 | interferon stimulate d gene 17 83<br>[Ovis aries]                                                                                                                                                                                                                | gi 1208240<br>2,gi 576191                                         | 17,482.10 | 100.00% | 4 | 4 | 4 | 0.03% | 33.10% | MLGGEE<br>ILVPLR                  | 2.69 | 1,342.74 |
| ATP | 6018 | interferon stimulate d gene 17 83<br>[Ovis aries]                                                                                                                                                                                                                | gi 1208240<br>2,gi 576191                                         | 17,482.10 | 100.00% | 4 | 4 | 4 | 0.03% | 33.10% | SSSYEV<br>QLTQTV<br>AVLK          | 3.97 | 1,752.94 |
| ATP | 6018 | PREDIC TED: 92,gi 12206<br>similar to 4341,gi 735<br>E3 86675,gi 77<br>ubiquitin-protein<br>ligase<br>MARCH 5<br>(Membrane-<br>associate d RING<br>finger<br>protein 5)<br>(Membrane-<br>associate d RING-<br>CH<br>protein V)<br>(MARCH H-V)<br>(RING<br>finger | gi 1199174<br>92,gi 12206<br>4341,gi 735<br>86675,gi 77<br>736375 | 29,755.90 | 99.80%  | 2 | 2 | 2 | 0.02% | 13.70% | ADPLFLL<br>IGLPTIP<br>VMLILG<br>K | 2.96 | 2,250.36 |



|     |      |                                                                                                                                                                       |            |           |        |   |   |   |       |        |                               |          |
|-----|------|-----------------------------------------------------------------------------------------------------------------------------------------------------------------------|------------|-----------|--------|---|---|---|-------|--------|-------------------------------|----------|
| ATP | 6018 | PREDIC TED: similar to E3 ubiquitin-protein ligase MARCH 5 (Membrane-associated RING finger protein 5) (Membrane-associated RING-CH protein V) (MARCH-V) (RING finger | gi 1199174 | 29,755.90 | 99.80% | 2 | 2 | 2 | 0.02% | 13.70% | IPAEANP 2.61<br>LADHVS<br>ATR | 1,661.86 |
| ATP | 6018 | RecName : Full=60S acidic ribosomal protein P0; AltName: Full=L10 E                                                                                                   | gi 1089358 | 34,353.40 | 99.80% | 2 | 2 | 2 | 0.02% | 6.92%  | IIQLDD YPK 3.69               | 1,217.68 |
| ATP | 6018 | RecName : Full=60S acidic ribosomal protein P0; AltName: Full=L10 E                                                                                                   | gi 1089358 | 34,353.40 | 99.80% | 2 | 2 | 2 | 0.02% | 6.92%  | TSFQAL GITTK 2.82             | 1,313.71 |
| ATP | 6018 | RPL12 protein                                                                                                                                                         | gi 1487441 | 17,801.10 | 99.80% | 2 | 2 | 2 | 0.02% | 15.20% | IGPLGLS PK 2.24               | 881.5457 |
| ATP | 6018 | RPL12 protein                                                                                                                                                         | gi 1487441 | 17,801.10 | 99.80% | 2 | 2 | 2 | 0.02% | 15.20% | QAQIEV VPSASA LIIK 4.24       | 1,666.97 |
| ATP | 6018 | Nucleobindin 2                                                                                                                                                        | gi 1139121 | 49,171.70 | 99.80% | 2 | 2 | 3 | 0.03% | 8.19%  | LHDVNS DGFLDE QELEALF TK 4.24 | 2,420.16 |
| ATP | 6018 | Nucleobindin 2                                                                                                                                                        | gi 1139121 | 49,171.70 | 99.80% | 2 | 2 | 3 | 0.03% | 8.19%  | QVIDVL ETDSHF R 3.63          | 1,558.79 |

|     |      |                                                                                                     |                                                    |            |         |    |    |    |       |        |                                                |      |          |
|-----|------|-----------------------------------------------------------------------------------------------------|----------------------------------------------------|------------|---------|----|----|----|-------|--------|------------------------------------------------|------|----------|
| ATP | 6018 | VAMP<br>(vesicle-<br>associate<br>d<br>membran<br>e protein)-<br>associate<br>d protein<br>A, 33kDa | gi 1113046<br>48,gi 11549<br>6338,gi 121<br>957506 | 27,838.90  | 99.80%  | 2  | 4  | 6  | 0.05% | 11.20% | FKGPFPT<br>DVVTTN<br>LK                        | 4.16 | 1,566.85 |
| ATP | 6018 | VAMP<br>(vesicle-<br>associate<br>d<br>membran<br>e protein)-<br>associate<br>d protein<br>A, 33kDa | gi 1113046<br>48,gi 11549<br>6338,gi 121<br>957506 | 27,838.90  | 99.80%  | 2  | 4  | 6  | 0.05% | 11.20% | GPFTDV<br>VTTNLK                               | 4.12 | 1,291.69 |
| ATP | 6018 | VAMP<br>(vesicle-<br>associate<br>d<br>membran<br>e protein)-<br>associate<br>d protein<br>A, 33kDa | gi 1113046<br>48,gi 11549<br>6338,gi 121<br>957506 | 27,838.90  | 99.80%  | 2  | 4  | 6  | 0.05% | 11.20% | HEQILVL<br>DPPTDL<br>K                         | 4.33 | 1,617.89 |
| ATP | 6018 | RecName<br>:<br>Full=Cate<br>nin alpha-<br>1                                                        | gi 1141492<br>56,gi 75773<br>615,gi 7836<br>9272   | 100,117.00 | 100.00% | 17 | 19 | 26 | 0.22% | 31.60% | AEVQNL<br>GGELVV<br>SGVDSA<br>MSLIQA<br>AK     | 5.48 | 2,602.34 |
| ATP | 6018 | RecName<br>:<br>Full=Cate<br>nin alpha-<br>1                                                        | gi 1141492<br>56,gi 75773<br>615,gi 7836<br>9272   | 100,117.00 | 100.00% | 17 | 19 | 26 | 0.22% | 31.60% | AHVLA<br>SVEQAT<br>ENFLEK                      | 3.83 | 1,957.00 |
| ATP | 6018 | RecName<br>:<br>Full=Cate<br>nin alpha-<br>1                                                        | gi 1141492<br>56,gi 75773<br>615,gi 7836<br>9272   | 100,117.00 | 100.00% | 17 | 19 | 26 | 0.22% | 31.60% | AIMAQL<br>PQEQL                                | 3.84 | 1,272.66 |
| ATP | 6018 | RecName<br>:<br>Full=Cate<br>nin alpha-<br>1                                                        | gi 1141492<br>56,gi 75773<br>615,gi 7836<br>9272   | 100,117.00 | 100.00% | 17 | 19 | 26 | 0.22% | 31.60% | ALKPEV<br>DKLNIM<br>AAK                        | 2.78 | 1,656.94 |
| ATP | 6018 | RecName<br>:<br>Full=Cate<br>nin alpha-<br>1                                                        | gi 1141492<br>56,gi 75773<br>615,gi 7836<br>9272   | 100,117.00 | 100.00% | 17 | 19 | 26 | 0.22% | 31.60% | ESQFLKE<br>ELVAAV<br>EDVRK                     | 4.85 | 2,090.11 |
| ATP | 6018 | RecName<br>:<br>Full=Cate<br>nin alpha-<br>1                                                        | gi 1141492<br>56,gi 75773<br>615,gi 7836<br>9272   | 100,117.00 | 100.00% | 17 | 19 | 26 | 0.22% | 31.60% | FTEQVE<br>AAVEAL<br>SSDPAQ<br>PMDENE<br>FIDASR | 5.1  | 3,312.49 |
| ATP | 6018 | RecName<br>:<br>Full=Cate<br>nin alpha-<br>1                                                        | gi 1141492<br>56,gi 75773<br>615,gi 7836<br>9272   | 100,117.00 | 100.00% | 17 | 19 | 26 | 0.22% | 31.60% | HVNPVQ<br>ALSEFK                               | 2.89 | 1,368.73 |

|     |      |                                                                                                                                                     |            |         |    |    |    |       |        |                                                    |          |
|-----|------|-----------------------------------------------------------------------------------------------------------------------------------------------------|------------|---------|----|----|----|-------|--------|----------------------------------------------------|----------|
| ATP | 6018 | RecName gi 1141492 :<br>56,gi 75773<br>Full=Cate 615,gi 7836<br>nin alpha- 9272<br>1                                                                | 100,117.00 | 100.00% | 17 | 19 | 26 | 0.22% | 31.60% | IAEQVAS 3.92<br>FQEEK                              | 1,378.68 |
| ATP | 6018 | RecName gi 1141492 :<br>56,gi 75773<br>Full=Cate 615,gi 7836<br>nin alpha- 9272<br>1                                                                | 100,117.00 | 100.00% | 17 | 19 | 26 | 0.22% | 31.60% | LLILAD 3.12<br>MADVY<br>K                          | 1,380.74 |
| ATP | 6018 | RecName gi 1141492 :<br>56,gi 75773<br>Full=Cate 615,gi 7836<br>nin alpha- 9272<br>1                                                                | 100,117.00 | 100.00% | 17 | 19 | 26 | 0.22% | 31.60% | NAGTEQ 3.65<br>DLGIQY<br>K                         | 1,436.70 |
| ATP | 6018 | RecName gi 1141492 :<br>56,gi 75773<br>Full=Cate 615,gi 7836<br>nin alpha- 9272<br>1                                                                | 100,117.00 | 100.00% | 17 | 19 | 26 | 0.22% | 31.60% | NLMNAV 3.98<br>VQTVK                               | 1,232.67 |
| ATP | 6018 | RecName gi 1141492 :<br>56,gi 75773<br>Full=Cate 615,gi 7836<br>nin alpha- 9272<br>1                                                                | 100,117.00 | 100.00% | 17 | 19 | 26 | 0.22% | 31.60% | QALQDL 3.99<br>LSEYMG<br>NAGR                      | 1,781.85 |
| ATP | 6018 | RecName gi 1141492 :<br>56,gi 75773<br>Full=Cate 615,gi 7836<br>nin alpha- 9272<br>1                                                                | 100,117.00 | 100.00% | 17 | 19 | 26 | 0.22% | 31.60% | QIIVDPL 3.7<br>SFSEER                              | 1,532.80 |
| ATP | 6018 | RecName gi 1141492 :<br>56,gi 75773<br>Full=Cate 615,gi 7836<br>nin alpha- 9272<br>1                                                                | 100,117.00 | 100.00% | 17 | 19 | 26 | 0.22% | 31.60% | SDALNS 3.56<br>AIDKMT<br>K                         | 1,409.69 |
| ATP | 6018 | RecName gi 1141492 :<br>56,gi 75773<br>Full=Cate 615,gi 7836<br>nin alpha- 9272<br>1                                                                | 100,117.00 | 100.00% | 17 | 19 | 26 | 0.22% | 31.60% | TSVQTE 4.52<br>DDQLIA<br>GQSAR                     | 1,818.88 |
| ATP | 6018 | RecName gi 1141492 :<br>56,gi 75773<br>Full=Cate 615,gi 7836<br>nin alpha- 9272<br>1                                                                | 100,117.00 | 100.00% | 17 | 19 | 26 | 0.22% | 31.60% | VIHVVTS 3.76<br>EMDNYE<br>PGVYTE<br>K              | 2,326.09 |
| ATP | 6018 | RecName gi 1141492 :<br>56,gi 75773<br>Full=Cate 615,gi 7836<br>nin alpha- 9272<br>1                                                                | 100,117.00 | 100.00% | 17 | 19 | 26 | 0.22% | 31.60% | VLTDVA 4.29<br>DDITSID<br>DFLAVS<br>ENHILED<br>VNK | 3,200.58 |
| ATP | 6018 | RecName gi 1098952 :<br>13,gi 74354<br>Full=Tra 058,gi 7773<br>nsmembr 6477<br>ane and<br>coiled-<br>coil<br>domain-<br>containin<br>g protein<br>1 | 21,158.30  | 99.80%  | 2  | 3  | 3  | 0.03% | 15.40% | LPFTPLS 3.66<br>YIQGLSH<br>R                       | 1,728.94 |

|     |      |                                                                          |                                        |           |         |    |    |    |       |        |                            |      |          |
|-----|------|--------------------------------------------------------------------------|----------------------------------------|-----------|---------|----|----|----|-------|--------|----------------------------|------|----------|
| ATP | 6018 | RecName : Full=Transmembrane and coiled-coil domain-containing protein 1 | gi 109895213,gi 74354058,gi 77736477   | 21,158.30 | 99.80%  | 2  | 3  | 3  | 0.03% | 15.40% | QAGGFL<br>GPPPPSG<br>K     | 2.51 | 1,309.69 |
| ATP | 6018 | Heat shock 70kDa protein 5 (glucose-regulated protein, 78kDa)            | gi 111308468,gi 115495027,gi 152941210 | 72,383.60 | 100.00% | 25 | 33 | 58 | 0.50% | 42.10% | AKFEEL<br>NMDLFR           | 4.68 | 1,528.75 |
| ATP | 6018 | Heat shock 70kDa protein 5 (glucose-regulated protein, 78kDa)            | gi 111308468,gi 115495027,gi 152941210 | 72,383.60 | 100.00% | 25 | 33 | 58 | 0.50% | 42.10% | DAGTIA<br>GLNVMR           | 3.84 | 1,233.63 |
| ATP | 6018 | Heat shock 70kDa protein 5 (glucose-regulated protein, 78kDa)            | gi 111308468,gi 115495027,gi 152941210 | 72,383.60 | 100.00% | 25 | 33 | 58 | 0.50% | 42.10% | DNHLLG<br>TFDLTGI<br>PPAPR | 2.8  | 1,934.01 |
| ATP | 6018 | Heat shock 70kDa protein 5 (glucose-regulated protein, 78kDa)            | gi 111308468,gi 115495027,gi 152941210 | 72,383.60 | 100.00% | 25 | 33 | 58 | 0.50% | 42.10% | EFFNGK<br>EPSR             | 2.3  | 1,210.59 |
| ATP | 6018 | Heat shock 70kDa protein 5 (glucose-regulated protein, 78kDa)            | gi 111308468,gi 115495027,gi 152941210 | 72,383.60 | 100.00% | 25 | 33 | 58 | 0.50% | 42.10% | ELEEIVQ<br>PIISK           | 3.58 | 1,397.79 |
| ATP | 6018 | Heat shock 70kDa protein 5 (glucose-regulated protein, 78kDa)            | gi 111308468,gi 115495027,gi 152941210 | 72,383.60 | 100.00% | 25 | 33 | 58 | 0.50% | 42.10% | FEELNM<br>DLFR             | 2.93 | 1,329.61 |
| ATP | 6018 | Heat shock 70kDa protein 5 (glucose-regulated protein, 78kDa)            | gi 111308468,gi 115495027,gi 152941210 | 72,383.60 | 100.00% | 25 | 33 | 58 | 0.50% | 42.10% | GVPQIEV<br>TFEIDVN<br>GILR | 3.14 | 1,999.09 |

|     |      |                                                               |                                           |           |         |    |    |    |       |        |                            |      |          |
|-----|------|---------------------------------------------------------------|-------------------------------------------|-----------|---------|----|----|----|-------|--------|----------------------------|------|----------|
| ATP | 6018 | Heat shock 70kDa protein 5 (glucose-regulated protein, 78kDa) | gi 1113084.68.gi 11549.5027.gi 152.941210 | 72,383.60 | 100.00% | 25 | 33 | 58 | 0.50% | 42.10% | IDTRNEL<br>ESYAYS<br>LK    | 4.24 | 1,801.90 |
| ATP | 6018 | Heat shock 70kDa protein 5 (glucose-regulated protein, 78kDa) | gi 1113084.68.gi 11549.5027.gi 152.941210 | 72,383.60 | 100.00% | 25 | 33 | 58 | 0.50% | 42.10% | IEIESFYE<br>GEDFSE<br>TLTR | 3.61 | 2,164.99 |
| ATP | 6018 | Heat shock 70kDa protein 5 (glucose-regulated protein, 78kDa) | gi 1113084.68.gi 11549.5027.gi 152.941210 | 72,383.60 | 100.00% | 25 | 33 | 58 | 0.50% | 42.10% | IINEPTA<br>AAIAYG<br>LDK   | 4.25 | 1,659.90 |
| ATP | 6018 | Heat shock 70kDa protein 5 (glucose-regulated protein, 78kDa) | gi 1113084.68.gi 11549.5027.gi 152.941210 | 72,383.60 | 100.00% | 25 | 33 | 58 | 0.50% | 42.10% | IINEPTA<br>AAIAYG<br>LDKR  | 4.45 | 1,816.00 |
| ATP | 6018 | Heat shock 70kDa protein 5 (glucose-regulated protein, 78kDa) | gi 1113084.68.gi 11549.5027.gi 152.941210 | 72,383.60 | 100.00% | 25 | 33 | 58 | 0.50% | 42.10% | ITPSYVA<br>FTPEGER         | 3.41 | 1,566.78 |
| ATP | 6018 | Heat shock 70kDa protein 5 (glucose-regulated protein, 78kDa) | gi 1113084.68.gi 11549.5027.gi 152.941210 | 72,383.60 | 100.00% | 25 | 33 | 58 | 0.50% | 42.10% | KKELEEI<br>VQPIISK         | 4.93 | 1,653.98 |
| ATP | 6018 | Heat shock 70kDa protein 5 (glucose-regulated protein, 78kDa) | gi 1113084.68.gi 11549.5027.gi 152.941210 | 72,383.60 | 100.00% | 25 | 33 | 58 | 0.50% | 42.10% | KSQIFST<br>ASDNQP<br>TVTIK | 3.59 | 1,965.03 |
| ATP | 6018 | Heat shock 70kDa protein 5 (glucose-regulated protein, 78kDa) | gi 1113084.68.gi 11549.5027.gi 152.941210 | 72,383.60 | 100.00% | 25 | 33 | 58 | 0.50% | 42.10% | KVTHAV<br>VTVPAY<br>FNDAQR | 2.36 | 2,016.07 |

|     |      |                                                               |                                           |           |         |    |    |    |       |        |                                |          |
|-----|------|---------------------------------------------------------------|-------------------------------------------|-----------|---------|----|----|----|-------|--------|--------------------------------|----------|
| ATP | 6018 | Heat shock 70kDa protein 5 (glucose-regulated protein, 78kDa) | gi 1113084.68.gi 11549.5027.gi 152.941210 | 72,383.60 | 100.00% | 25 | 33 | 58 | 0.50% | 42.10% | MKETAE 3.67<br>AYLGKK          | 1,384.71 |
| ATP | 6018 | Heat shock 70kDa protein 5 (glucose-regulated protein, 78kDa) | gi 1113084.68.gi 11549.5027.gi 152.941210 | 72,383.60 | 100.00% | 25 | 33 | 58 | 0.50% | 42.10% | MVNDAAE 3.58<br>KFAEED<br>KK   | 1,669.77 |
| ATP | 6018 | Heat shock 70kDa protein 5 (glucose-regulated protein, 78kDa) | gi 1113084.68.gi 11549.5027.gi 152.941210 | 72,383.60 | 100.00% | 25 | 33 | 58 | 0.50% | 42.10% | NELESY 3.65<br>AYSLK           | 1,316.64 |
| ATP | 6018 | Heat shock 70kDa protein 5 (glucose-regulated protein, 78kDa) | gi 1113084.68.gi 11549.5027.gi 152.941210 | 72,383.60 | 100.00% | 25 | 33 | 58 | 0.50% | 42.10% | NQLTSN 5.03<br>PENTVF<br>DAK   | 1,677.81 |
| ATP | 6018 | Heat shock 70kDa protein 5 (glucose-regulated protein, 78kDa) | gi 1113084.68.gi 11549.5027.gi 152.941210 | 72,383.60 | 100.00% | 25 | 33 | 58 | 0.50% | 42.10% | SDIDEIV 2.28<br>LVGGST<br>R    | 1,460.76 |
| ATP | 6018 | Heat shock 70kDa protein 5 (glucose-regulated protein, 78kDa) | gi 1113084.68.gi 11549.5027.gi 152.941210 | 72,383.60 | 100.00% | 25 | 33 | 58 | 0.50% | 42.10% | SQIFSTA 4.14<br>SDNQPT<br>VTIK | 1,836.93 |
| ATP | 6018 | Heat shock 70kDa protein 5 (glucose-regulated protein, 78kDa) | gi 1113084.68.gi 11549.5027.gi 152.941210 | 72,383.60 | 100.00% | 25 | 33 | 58 | 0.50% | 42.10% | TFAPEEI 4.23<br>SAMVLT<br>K    | 1,552.79 |
| ATP | 6018 | Heat shock 70kDa protein 5 (glucose-regulated protein, 78kDa) | gi 1113084.68.gi 11549.5027.gi 152.941210 | 72,383.60 | 100.00% | 25 | 33 | 58 | 0.50% | 42.10% | TKPYIQV 4.09<br>DVGGGQ<br>TK   | 1,590.85 |

|     |      |                                                               |                                                                                                      |           |         |    |    |    |       |        |                                             |      |          |
|-----|------|---------------------------------------------------------------|------------------------------------------------------------------------------------------------------|-----------|---------|----|----|----|-------|--------|---------------------------------------------|------|----------|
| ATP | 6018 | Heat shock 70kDa protein 5 (glucose-regulated protein, 78kDa) | gi 111308468,gi 115495027,gi 152941210                                                               | 72,383.60 | 100.00% | 25 | 33 | 58 | 0.50% | 42.10% | VLESDS<br>LKKSDID<br>EIVLVG<br>GSTR         | 5.46 | 2,488.31 |
| ATP | 6018 | Heat shock 70kDa protein 5 (glucose-regulated protein, 78kDa) | gi 111308468,gi 115495027,gi 152941210                                                               | 72,383.60 | 100.00% | 25 | 33 | 58 | 0.50% | 42.10% | VTHAVV<br>TVPAYF<br>NDAQR                   | 5.17 | 1,887.97 |
| ATP | 6018 | Junction plakoglobin in                                       | gi 109658166,gi 157391363,gi 158065994,gi 20336613,gi 211637709,gi 218103015,gi 51316492,gi 51591897 | 81,804.10 | 100.00% | 4  | 5  | 6  | 0.05% | 11.30% | LNTIPLF<br>VQLLYS<br>SVENIQR                | 4.09 | 2,347.30 |
| ATP | 6018 | Junction plakoglobin in                                       | gi 109658166,gi 157391363,gi 158065994,gi 20336613,gi 211637709,gi 218103015,gi 51316492,gi 51591897 | 81,804.10 | 100.00% | 4  | 5  | 6  | 0.05% | 11.30% | MLSSPV<br>ESVLFY<br>AITLHN<br>LLLYQE<br>GAK | 3.49 | 3,153.65 |
| ATP | 6018 | Junction plakoglobin in                                       | gi 109658166,gi 157391363,gi 158065994,gi 20336613,gi 211637709,gi 218103015,gi 51316492,gi 51591897 | 81,804.10 | 100.00% | 4  | 5  | 6  | 0.05% | 11.30% | SAIVHLI<br>NYQDDA<br>ELATR                  | 3.27 | 2,029.04 |
| ATP | 6018 | Junction plakoglobin in                                       | gi 109658166,gi 157391363,gi 158065994,gi 20336613,gi 211637709,gi 218103015,gi 51316492,gi 51591897 | 81,804.10 | 100.00% | 4  | 5  | 6  | 0.05% | 11.30% | TLVTQN<br>SGVEALI<br>HAILR                  | 2.57 | 1,935.10 |
| ATP | 6018 | tubulin, beta 6                                               | gi 114052148,gi 87578360                                                                             | 49,882.10 | 100.00% | 3  | 3  | 3  | 0.03% | 39.00% | AALVDL<br>EPGTMD<br>SVR                     | 3.75 | 1,589.78 |
| ATP | 6018 | tubulin, beta 6                                               | gi 114052148,gi 87578360                                                                             | 49,882.10 | 100.00% | 3  | 3  | 3  | 0.03% | 39.00% | ALTVPE<br>LTQQMF<br>DAK                     | 3.29 | 1,707.86 |
| ATP | 6018 | tubulin, beta 6                                               | gi 114052148,gi 87578360                                                                             | 49,882.10 | 100.00% | 3  | 3  | 3  | 0.03% | 39.00% | FPGQLN<br>ADLR                              | 2.72 | 1,130.60 |

|     |      |                                                                                                                                                                                                                        |                                                                   |           |         |   |   |   |       |        |                                                                     |          |
|-----|------|------------------------------------------------------------------------------------------------------------------------------------------------------------------------------------------------------------------------|-------------------------------------------------------------------|-----------|---------|---|---|---|-------|--------|---------------------------------------------------------------------|----------|
| ATP | 6018 | tubulin,<br>beta 6                                                                                                                                                                                                     | gi 1140521<br>48,gi 87578<br>360                                  | 49,882.10 | 100.00% | 3 | 3 | 3 | 0.03% | 39.00% | FPGQLN 2.7<br>ADLRK                                                 | 1,258.69 |
| ATP | 6018 | tubulin,<br>beta 6                                                                                                                                                                                                     | gi 1140521<br>48,gi 87578<br>360                                  | 49,882.10 | 100.00% | 3 | 3 | 3 | 0.03% | 39.00% | GHYTEG 4.05<br>AELVDS<br>VLDVVR                                     | 1,958.98 |
| ATP | 6018 | tubulin,<br>beta 6                                                                                                                                                                                                     | gi 1140521<br>48,gi 87578<br>360                                  | 49,882.10 | 100.00% | 3 | 3 | 3 | 0.03% | 39.00% | GHYTEG 4.32<br>AELVDS<br>VLDVVR<br>K                                | 2,087.08 |
| ATP | 6018 | tubulin,<br>beta 6                                                                                                                                                                                                     | gi 1140521<br>48,gi 87578<br>360                                  | 49,882.10 | 100.00% | 3 | 3 | 3 | 0.03% | 39.00% | LAVNMV 4.05<br>PFPR                                                 | 1,159.63 |
| ATP | 6018 | tubulin,<br>beta 6                                                                                                                                                                                                     | gi 1140521<br>48,gi 87578<br>360                                  | 49,882.10 | 100.00% | 3 | 3 | 3 | 0.03% | 39.00% | LHFFMP 3.76<br>GFAPLT<br>AR                                         | 1,620.84 |
| ATP | 6018 | tubulin,<br>beta 6                                                                                                                                                                                                     | gi 1140521<br>48,gi 87578<br>360                                  | 49,882.10 | 100.00% | 3 | 3 | 3 | 0.03% | 39.00% | LTTPTY 2.77<br>GDLNHL<br>VSATMS<br>GVTTSL<br>R                      | 2,651.33 |
| ATP | 6018 | tubulin,<br>beta 6                                                                                                                                                                                                     | gi 1140521<br>48,gi 87578<br>360                                  | 49,882.10 | 100.00% | 3 | 3 | 3 | 0.03% | 39.00% | MSATFIG 4.88<br>NSTAIQE<br>LFK                                      | 1,873.94 |
| ATP | 6018 | tubulin,<br>beta 6                                                                                                                                                                                                     | gi 1140521<br>48,gi 87578<br>360                                  | 49,882.10 | 100.00% | 3 | 3 | 3 | 0.03% | 39.00% | VSDTVV 4.3<br>EPYNAT<br>LSVHQL<br>VENTDE<br>TYCIDNE<br>ALYDICF<br>R | 4,479.06 |
| ATP | 6018 | tubulin,<br>beta 6                                                                                                                                                                                                     | gi 1140521<br>48,gi 87578<br>360                                  | 49,882.10 | 100.00% | 3 | 3 | 3 | 0.03% | 39.00% | YLTVAA 2.97<br>VFR                                                  | 1,039.59 |
| ATP | 6018 | RecName<br>:<br>Full=Rab<br>GDP<br>dissociati<br>on<br>inhibitor<br>beta;<br>Short=Ra<br>b GDI<br>beta;<br>AltName:<br>Full=Gua<br>nosine<br>diphosph<br>ate<br>dissociati<br>on<br>inhibitor<br>2;<br>Short=G<br>DI-2 | gi 1099397<br>13,gi 14623<br>1738,gi 757<br>73612,gi 76<br>253900 | 50,472.30 | 99.80%  | 2 | 2 | 2 | 0.02% | 6.74%  | FVSISDL 2.5<br>LVPK                                                 | 1,217.71 |



|     |      |                                                                                                                                                                                                                        |                                                                   |           |         |   |   |   |       |        |                                  |          |
|-----|------|------------------------------------------------------------------------------------------------------------------------------------------------------------------------------------------------------------------------|-------------------------------------------------------------------|-----------|---------|---|---|---|-------|--------|----------------------------------|----------|
| ATP | 6018 | RecName<br>:<br>Full=Rab<br>GDP<br>dissociati<br>on<br>inhibitor<br>beta;<br>Short=Ra<br>b GDI<br>beta;<br>AltName:<br>Full=Gua<br>nosine<br>diphosph<br>ate<br>dissociati<br>on<br>inhibitor<br>2;<br>Short=G<br>DI-2 | gi 1099397<br>13,gi 14623<br>1738,gi 757<br>73612,gi 76<br>253900 | 50,472.30 | 99.80%  | 2 | 2 | 2 | 0.02% | 6.74%  | SPYLYPL 4.58<br>YGLGEL<br>PQGFAR | 2,141.11 |
| ATP | 6018 | RecName<br>:<br>Full=60S<br>ribosomal<br>protein<br>L11                                                                                                                                                                | gi 1088609<br>25,gi 11549<br>7634,gi 742<br>68362                 | 20,235.20 | 99.80%  | 2 | 2 | 2 | 0.02% | 12.90% | VLEQLT 3.49<br>GQTPVF<br>SK      | 1,546.85 |
| ATP | 6018 | RecName<br>:<br>Full=60S<br>ribosomal<br>protein<br>L11                                                                                                                                                                | gi 1088609<br>25,gi 11549<br>7634,gi 742<br>68362                 | 20,235.20 | 99.80%  | 2 | 2 | 2 | 0.02% | 12.90% | YDGILP 2.43<br>GK                | 975.5512 |
| ATP | 6018 | syntaxin<br>7                                                                                                                                                                                                          | gi 1181508<br>40,gi 12214<br>0829,gi 735<br>86654                 | 29,638.60 | 99.80%  | 2 | 2 | 4 | 0.03% | 10.70% | EFGSLPT 3.69<br>TPSDQR           | 1,434.69 |
| ATP | 6018 | syntaxin<br>7                                                                                                                                                                                                          | gi 1181508<br>40,gi 12214<br>0829,gi 735<br>86654                 | 29,638.60 | 99.80%  | 2 | 2 | 4 | 0.03% | 10.70% | TLNQLG 5.15<br>TPQDSPE<br>LR     | 1,668.86 |
| ATP | 6018 | SEC11<br>homolog<br>A (S.<br>cerevisiae<br>)                                                                                                                                                                           | gi 1515546<br>19,gi 27806<br>149,gi 5403<br>9632,gi 697<br>9934   | 20,607.80 | 100.00% | 5 | 6 | 8 | 0.07% | 19.60% | GDLLFL 2.49<br>TNR               | 1,048.58 |
| ATP | 6018 | SEC11<br>homolog<br>A (S.<br>cerevisiae<br>)                                                                                                                                                                           | gi 1515546<br>19,gi 27806<br>149,gi 5403<br>9632,gi 697<br>9934   | 20,607.80 | 100.00% | 5 | 6 | 8 | 0.07% | 19.60% | GDLLFL 3.03<br>TNRVED<br>PIR     | 1,757.95 |
| ATP | 6018 | SEC11<br>homolog<br>A (S.<br>cerevisiae<br>)                                                                                                                                                                           | gi 1515546<br>19,gi 27806<br>149,gi 5403<br>9632,gi 697<br>9934   | 20,607.80 | 100.00% | 5 | 6 | 8 | 0.07% | 19.60% | MLSLDF 2.56<br>LDDVR             | 1,339.66 |
| ATP | 6018 | SEC11<br>homolog<br>A (S.<br>cerevisiae<br>)                                                                                                                                                                           | gi 1515546<br>19,gi 27806<br>149,gi 5403<br>9632,gi 697<br>9934   | 20,607.80 | 100.00% | 5 | 6 | 8 | 0.07% | 19.60% | MLSLDF 2.38<br>LDDVRR            | 1,495.76 |
| ATP | 6018 | SEC11<br>homolog<br>A (S.<br>cerevisiae<br>)                                                                                                                                                                           | gi 1515546<br>19,gi 27806<br>149,gi 5403<br>9632,gi 697<br>9934   | 20,607.80 | 100.00% | 5 | 6 | 8 | 0.07% | 19.60% | VGEIVVF 2.74<br>R                | 918.5407 |

|     |      |                                                                                                                                                |                                                   |            |         |   |   |    |       |        |                             |      |          |
|-----|------|------------------------------------------------------------------------------------------------------------------------------------------------|---------------------------------------------------|------------|---------|---|---|----|-------|--------|-----------------------------|------|----------|
| ATP | 6018 | CAND1 protein                                                                                                                                  | gi 154426008,gi 155372073,gi 182627583            | 136,363.10 | 100.00% | 4 | 4 | 4  | 0.03% | 5.20%  | IDLRPVL<br>GEGVPIL<br>ASFLR | 2.86 | 2,065.22 |
| ATP | 6018 | CAND1 protein                                                                                                                                  | gi 154426008,gi 155372073,gi 182627583            | 136,363.10 | 100.00% | 4 | 4 | 4  | 0.03% | 5.20%  | ISGSILN<br>ELIGLVR          | 4.7  | 1,483.88 |
| ATP | 6018 | CAND1 protein                                                                                                                                  | gi 154426008,gi 155372073,gi 182627583            | 136,363.10 | 100.00% | 4 | 4 | 4  | 0.03% | 5.20%  | MLTGPV<br>YSQSTA<br>LTHK    | 3.04 | 1,749.88 |
| ATP | 6018 | CAND1 protein                                                                                                                                  | gi 154426008,gi 155372073,gi 182627583            | 136,363.10 | 100.00% | 4 | 4 | 4  | 0.03% | 5.20%  | SVILEAF<br>SSPSEEV<br>K     | 3.35 | 1,621.83 |
| ATP | 6018 | RecName :<br>Full=Acy<br>l-protein<br>thioesterase 1;<br>AltName:<br>Full=Lys<br>ophospholipase 1;<br>AltName:<br>Full=Lys<br>ophospholipase I | gi 115311636,gi 75948308,gi 77736321              | 24,578.40  | 99.80%  | 2 | 2 | 2  | 0.02% | 10.40% | ASFPQGP<br>IGGVNR           | 1.99 | 1,299.68 |
| ATP | 6018 | RecName :<br>Full=Acy<br>l-protein<br>thioesterase 1;<br>AltName:<br>Full=Lys<br>ophospholipase 1;<br>AltName:<br>Full=Lys<br>ophospholipase I | gi 115311636,gi 75948308,gi 77736321              | 24,578.40  | 99.80%  | 2 | 2 | 2  | 0.02% | 10.40% | TLVNPA<br>NVTFR             | 2.43 | 1,231.68 |
| ATP | 6018 | PREDICTED: brain protein 44                                                                                                                    | gi 119889010,gi 194665199                         | 14,264.40  | 99.80%  | 2 | 4 | 6  | 0.05% | 18.90% | LRPLYN<br>HPAGPR            | 2.57 | 1,390.77 |
| ATP | 6018 | PREDICTED: brain protein 44                                                                                                                    | gi 119889010,gi 194665199                         | 14,264.40  | 99.80%  | 2 | 4 | 6  | 0.05% | 18.90% | VLDKVE<br>LLLPEK            | 3.92 | 1,395.85 |
| ATP | 6018 | SLC3A2 protein                                                                                                                                 | gi 115304925,gi 164448600,gi 59857795,gi 74354296 | 63,166.50  | 100.00% | 8 | 9 | 16 | 0.14% | 20.30% | FLVVLN<br>FGDVGQ<br>LAR     | 4.95 | 1,647.92 |
| ATP | 6018 | SLC3A2 protein                                                                                                                                 | gi 115304925,gi 164448600,gi 59857795,gi 74354296 | 63,166.50  | 100.00% | 8 | 9 | 16 | 0.14% | 20.30% | FTGLSKE<br>ELLK             | 3.63 | 1,264.71 |

|     |      |                     |                                                   |           |         |   |   |     |       |        |                                                       |          |
|-----|------|---------------------|---------------------------------------------------|-----------|---------|---|---|-----|-------|--------|-------------------------------------------------------|----------|
| ATP | 6018 | SLC3A2 protein      | gi 115304925,gi 164448600,gi 59857795,gi 74354296 | 63,166.50 | 100.00% | 8 | 9 | 16  | 0.14% | 20.30% | LLIAGTD 5.05<br>SSDLQQI<br>LR                         | 1,742.97 |
| ATP | 6018 | SLC3A2 protein      | gi 115304925,gi 164448600,gi 59857795,gi 74354296 | 63,166.50 | 100.00% | 8 | 9 | 16  | 0.14% | 20.30% | NQEDDL 5.02<br>TETNLE<br>QIDPIFG<br>SK                | 2,406.13 |
| ATP | 6018 | SLC3A2 protein      | gi 115304925,gi 164448600,gi 59857795,gi 74354296 | 63,166.50 | 100.00% | 8 | 9 | 16  | 0.14% | 20.30% | NQEDDL 4.72<br>TETNLE<br>QIDPIFG<br>SKEDFES<br>LLHSAK | 3,662.73 |
| ATP | 6018 | SLC3A2 protein      | gi 115304925,gi 164448600,gi 59857795,gi 74354296 | 63,166.50 | 100.00% | 8 | 9 | 16  | 0.14% | 20.30% | SLLHGD 3.8<br>FYDLSS<br>GPDLFS<br>YIR                 | 2,402.17 |
| ATP | 6018 | SLC3A2 protein      | gi 115304925,gi 164448600,gi 59857795,gi 74354296 | 63,166.50 | 100.00% | 8 | 9 | 16  | 0.14% | 20.30% | VDLLLS 3.37<br>TQPGR                                  | 1,198.68 |
| ATP | 6018 | SLC3A2 protein      | gi 115304925,gi 164448600,gi 59857795,gi 74354296 | 63,166.50 | 100.00% | 8 | 9 | 16  | 0.14% | 20.30% | VILDLT 3.07<br>NYK                                    | 1,175.67 |
| ATP | 6018 | MHC class I antigen | gi 84095083                                       | 40,657.50 | 100.00% | 7 | 9 | 111 | 0.95% | 24.00% | DYIALNE 3.09<br>DLR                                   | 1,221.61 |
| ATP | 6018 | MHC class I antigen | gi 84095083                                       | 40,657.50 | 100.00% | 7 | 9 | 111 | 0.95% | 24.00% | FIAVGY 5.33<br>VDDTQF<br>VR                           | 1,629.83 |
| ATP | 6018 | MHC class I antigen | gi 84095083                                       | 40,657.50 | 100.00% | 7 | 9 | 111 | 0.95% | 24.00% | IYTQAAS 6.27<br>SDSAQG<br>SDVSLT<br>VPK               | 2,225.09 |
| ATP | 6018 | MHC class I antigen | gi 84095083                                       | 40,657.50 | 100.00% | 7 | 9 | 111 | 0.95% | 24.00% | IYTQAAS 5.15<br>SDSAQG<br>SDVSLT<br>VPKV              | 2,324.16 |
| ATP | 6018 | MHC class I antigen | gi 84095083                                       | 40,657.50 | 100.00% | 7 | 9 | 111 | 0.95% | 24.00% | SWTAAD 4.15<br>TAAQIT<br>K                            | 1,363.69 |
| ATP | 6018 | MHC class I antigen | gi 84095083                                       | 40,657.50 | 100.00% | 7 | 9 | 111 | 0.95% | 24.00% | VQHEGL 3.86<br>QEPLTLR                                | 1,519.82 |
| ATP | 6018 | MHC class I antigen | gi 84095083                                       | 40,657.50 | 100.00% | 7 | 9 | 111 | 0.95% | 24.00% | WAALVV 2.68<br>PSGEEQ<br>R                            | 1,441.74 |

|     |      |                                                                                                                                                                                                                                     |           |         |   |   |   |       |       |                             |          |
|-----|------|-------------------------------------------------------------------------------------------------------------------------------------------------------------------------------------------------------------------------------------|-----------|---------|---|---|---|-------|-------|-----------------------------|----------|
| ATP | 6018 | RecName gi 1221399 : 29,gi 75948 Full=Seri 211,gi 7773 ne 6443 palmitoyl transferase 1; AltName: Full=Seri ne-palmitoyl-CoA transferase 1; Short=SP T 1; Short=SP T1; AltName: Full=Long chain base biosynthesis protein 1; Short=L | 52,771.80 | 100.00% | 3 | 3 | 3 | 0.03% | 8.88% | LLKEQEI 4.36<br>EDQKNP<br>R | 1,739.93 |
| ATP | 6018 | RecName gi 1221399 : 29,gi 75948 Full=Seri 211,gi 7773 ne 6443 palmitoyl transferase 1; AltName: Full=Seri ne-palmitoyl-CoA transferase 1; Short=SP T 1; Short=SP T1; AltName: Full=Long chain base biosynthesis protein 1; Short=L | 52,771.80 | 100.00% | 3 | 3 | 3 | 0.03% | 8.88% | VVVTVE 4.66<br>QTEEDL<br>EK | 1,617.82 |

|     |      |                                                                                                                                                                                                                                                     |            |           |         |   |   |   |       |       |                                                   |          |
|-----|------|-----------------------------------------------------------------------------------------------------------------------------------------------------------------------------------------------------------------------------------------------------|------------|-----------|---------|---|---|---|-------|-------|---------------------------------------------------|----------|
| ATP | 6018 | RecName :<br>Full=Serine<br>palmitoyl<br>transferase 1;<br>AltName:<br>Full=Serine-<br>palmitoyl-<br>CoA<br>transferase 1;<br>Short=SP<br>T1;<br>Short=SP<br>T1;<br>AltName:<br>Full=Long<br>chain<br>base<br>biosynthesis<br>protein 1;<br>Short=L | gi 1221399 | 52,771.80 | 100.00% | 3 | 3 | 3 | 0.03% | 8.88% | VVVTVE 3.24<br>QTEEDL<br>EKAASTI<br>SEVAQT<br>VLL | 3,001.58 |
| ATP | 6018 | eukaryotic<br>translation<br>elongation<br>factor 2                                                                                                                                                                                                 | gi 1154979 | 95,352.20 | 100.00% | 5 | 6 | 6 | 0.05% | 9.44% | ALLELQ 4.75<br>LEPEELY<br>QTFQR                   | 2,220.15 |
| ATP | 6018 | eukaryotic<br>translation<br>elongation<br>factor 2                                                                                                                                                                                                 | gi 1154979 | 95,352.20 | 100.00% | 5 | 6 | 6 | 0.05% | 9.44% | ARPPFD 4.8<br>GLAEDID<br>KGEVSAR                  | 2,143.08 |
| ATP | 6018 | eukaryotic<br>translation<br>elongation<br>factor 2                                                                                                                                                                                                 | gi 1154979 | 95,352.20 | 100.00% | 5 | 6 | 6 | 0.05% | 9.44% | EGIPALD 3.26<br>NFLDKL                            | 1,444.77 |
| ATP | 6018 | eukaryotic<br>translation<br>elongation<br>factor 2                                                                                                                                                                                                 | gi 1154979 | 95,352.20 | 100.00% | 5 | 6 | 6 | 0.05% | 9.44% | STAISLF 5.2<br>YELSEN<br>DLNFIK                   | 2,204.11 |
| ATP | 6018 | eukaryotic<br>translation<br>elongation<br>factor 2                                                                                                                                                                                                 | gi 1154979 | 95,352.20 | 100.00% | 5 | 6 | 6 | 0.05% | 9.44% | VFSGLV 2.64<br>STGLK                              | 1,107.64 |

|     |      |                                                                                                                                                   |                                                                                  |           |         |   |   |   |       |        |                                   |      |          |
|-----|------|---------------------------------------------------------------------------------------------------------------------------------------------------|----------------------------------------------------------------------------------|-----------|---------|---|---|---|-------|--------|-----------------------------------|------|----------|
| ATP | 6018 | RecName<br>:<br>Full=Syn<br>aptic<br>glycoprot<br>ein SC2;<br>AltName:<br>Full=Tra<br>ns-2,3-<br>enoyl-<br>CoA<br>reductase<br>;<br>Short=TE<br>R | gi 1221409<br>18,gi 73586<br>600,gi 7773<br>6441                                 | 36,056.10 | 100.00% | 3 | 3 | 3 | 0.03% | 11.70% | DYPPLR<br>MPIIPFLL                | 2.84 | 1,700.94 |
| ATP | 6018 | RecName<br>:<br>Full=Syn<br>aptic<br>glycoprot<br>ein SC2;<br>AltName:<br>Full=Tra<br>ns-2,3-<br>enoyl-<br>CoA<br>reductase<br>;<br>Short=TE<br>R | gi 1221409<br>18,gi 73586<br>600,gi 7773<br>6441                                 | 36,056.10 | 100.00% | 3 | 3 | 3 | 0.03% | 11.70% | LPVGT<br>ATLYFR                   | 4.01 | 1,338.74 |
| ATP | 6018 | RecName<br>:<br>Full=Syn<br>aptic<br>glycoprot<br>ein SC2;<br>AltName:<br>Full=Tra<br>ns-2,3-<br>enoyl-<br>CoA<br>reductase<br>;<br>Short=TE<br>R | gi 1221409<br>18,gi 73586<br>600,gi 7773<br>6441                                 | 36,056.10 | 100.00% | 3 | 3 | 3 | 0.03% | 11.70% | SLKDED<br>VLQK                    | 2.58 | 1,174.63 |
| ATP | 6018 | RecName<br>:<br>Full=Gal<br>ectin-9                                                                                                               | gi 1221450<br>68,gi 59858<br>325,gi 6275<br>1460,gi 757<br>75171,gi 87<br>044899 | 39,329.70 | 99.80%  | 2 | 2 | 3 | 0.03% | 9.30%  | NLPAINN<br>LEVGGD<br>IQLTHV<br>QT | 5.76 | 2,246.18 |
| ATP | 6018 | RecName<br>:<br>Full=Gal<br>ectin-9                                                                                                               | gi 1221450<br>68,gi 59858<br>325,gi 6275<br>1460,gi 757<br>75171,gi 87<br>044899 | 39,329.70 | 99.80%  | 2 | 2 | 3 | 0.03% | 9.30%  | SGSDIAF<br>HLNPR                  | 3.06 | 1,313.66 |
| ATP | 6018 | PREDIC<br>TED:<br>similar to<br>Calpain-5<br>(nCL-3)<br>(htra-3)<br>isoform 1                                                                     | gi 7663613<br>4                                                                  | 72,988.00 | 100.00% | 3 | 3 | 3 | 0.03% | 8.12%  | ANADDL<br>QALHTL<br>HLR           | 3.24 | 1,687.89 |

|     |      |                                                                               |                           |           |         |   |   |    |       |        |                             |      |          |
|-----|------|-------------------------------------------------------------------------------|---------------------------|-----------|---------|---|---|----|-------|--------|-----------------------------|------|----------|
| ATP | 6018 | PREDIC TED: 4<br>similar to Calpain-5 (nCL-3) (htra-3) isoform 1              | gi 7663613                | 72,988.00 | 100.00% | 3 | 3 | 3  | 0.03% | 8.12%  | VLFEDP<br>NFPATD<br>DSLYYK  | 3.26 | 2,134.00 |
| ATP | 6018 | PREDIC TED: 4<br>similar to Calpain-5 (nCL-3) (htra-3) isoform 1              | gi 7663613                | 72,988.00 | 100.00% | 3 | 3 | 3  | 0.03% | 8.12%  | YVIIPTT<br>FEPGHT<br>GEFLLR | 2.42 | 2,190.16 |
| ATP | 6018 | RAB5C, member<br>RAS oncogene family                                          | gi 1096591<br>70,gi 61553 | 23,448.70 | 100.00% | 5 | 5 | 10 | 0.09% | 29.20% | GVDLQE<br>NNPASR            | 2.94 | 1,299.63 |
| ATP | 6018 | RAB5C, member<br>RAS oncogene family                                          | gi 1096591<br>70,gi 61553 | 23,448.70 | 100.00% | 5 | 5 | 10 | 0.09% | 29.20% | KLPKNE<br>PQNAAG<br>APGR    | 2.96 | 1,647.89 |
| ATP | 6018 | RAB5C, member<br>RAS oncogene family                                          | gi 1096591<br>70,gi 61553 | 23,448.70 | 100.00% | 5 | 5 | 10 | 0.09% | 29.20% | LVLLGE<br>SAVGK             | 3.81 | 1,085.66 |
| ATP | 6018 | RAB5C, member<br>RAS oncogene family                                          | gi 1096591<br>70,gi 61553 | 23,448.70 | 100.00% | 5 | 5 | 10 | 0.09% | 29.20% | QASPNIV<br>IALAGN<br>K      | 3.29 | 1,395.80 |
| ATP | 6018 | RAB5C, member<br>RAS oncogene family                                          | gi 1096591<br>70,gi 61553 | 23,448.70 | 100.00% | 5 | 5 | 10 | 0.09% | 29.20% | YHSLAP<br>MYYYR             | 2.6  | 1,316.61 |
| ATP | 6018 | PREDIC TED: 7597<br>similar to RAB6A, member<br>RAS oncogene family isoform 2 | gi 1199075<br>95,gi 11990 | 23,545.30 | 100.00% | 6 | 6 | 12 | 0.10% | 27.40% | ELNVMF<br>IETSAK            | 3.32 | 1,397.70 |
| ATP | 6018 | PREDIC TED: 7597<br>similar to RAB6A, member<br>RAS oncogene family isoform 2 | gi 1199075<br>95,gi 11990 | 23,545.30 | 100.00% | 6 | 6 | 12 | 0.10% | 27.40% | GSDVIIM<br>LVGNK            | 2.86 | 1,261.68 |
| ATP | 6018 | PREDIC TED: 7597<br>similar to RAB6A, member<br>RAS oncogene family isoform 2 | gi 1199075<br>95,gi 11990 | 23,545.30 | 100.00% | 6 | 6 | 12 | 0.10% | 27.40% | GSDVIIM<br>LVGNKT<br>DLADKR | 4.17 | 2,061.10 |

|     |      |                                                                                                                                |                                              |          |
|-----|------|--------------------------------------------------------------------------------------------------------------------------------|----------------------------------------------|----------|
| ATP | 6018 | PREDIC TED: gi 1199075 23,545.30 100.00% 6 6 12 0.10% 27.40%<br>similar to 7597<br>RAB6A, member RAS oncogene family isoform 2 | LVFLGE 2.84<br>QSVGK                         | 1,176.66 |
| ATP | 6018 | PREDIC TED: gi 1199075 23,545.30 100.00% 6 6 12 0.10% 27.40%<br>similar to 7597<br>RAB6A, member RAS oncogene family isoform 2 | RVAAAL 2.63<br>PGMEST<br>QDR                 | 1,617.80 |
| ATP | 6018 | PREDIC TED: gi 1199075 23,545.30 100.00% 6 6 12 0.10% 27.40%<br>similar to 7597<br>RAB6A, member RAS oncogene family isoform 2 | VAAALP 2.49<br>GMESTQ<br>DR                  | 1,461.70 |
| ATP | 6018 | PREDIC TED: gi 1946763 41,854.80 99.80% 2 3 5 0.04% 27.40%<br>similar to Actin, cytoplas mic 2 (Beta-actin-2)                  | DLTDYL 2.57<br>MK                            | 1,014.48 |
| ATP | 6018 | PREDIC TED: gi 1946763 41,854.80 99.80% 2 3 5 0.04% 27.40%<br>similar to Actin, cytoplas mic 2 (Beta-actin-2)                  | GYSFTT 3.25<br>TAER                          | 1,132.53 |
| ATP | 6018 | PREDIC TED: gi 1946763 41,854.80 99.80% 2 3 5 0.04% 27.40%<br>similar to Actin, cytoplas mic 2 (Beta-actin-2)                  | HQGVM 2.67<br>VGMGQ<br>KDCYVG<br>DEAQSK      | 2,383.05 |
| ATP | 6018 | PREDIC TED: gi 1946763 41,854.80 99.80% 2 3 5 0.04% 27.40%<br>similar to Actin, cytoplas mic 2 (Beta-actin-2)                  | HQGVM 3.39<br>VGMGQ<br>KDCYVG<br>DEAQSK<br>R | 2,539.15 |
| ATP | 6018 | PREDIC TED: gi 1946763 41,854.80 99.80% 2 3 5 0.04% 27.40%<br>similar to Actin, cytoplas mic 2 (Beta-actin-2)                  | IKIAPPE 3.12<br>RK                           | 1,164.75 |



|     |      |                                                                                          |                                                           |           |         |   |   |   |       |        |                                    |      |          |
|-----|------|------------------------------------------------------------------------------------------|-----------------------------------------------------------|-----------|---------|---|---|---|-------|--------|------------------------------------|------|----------|
| ATP | 6018 | PREDIC TED: 88<br>similar to Actin, cytoplasmic 2 (Beta-actin-2)                         | gi 1946763                                                | 41,854.80 | 99.80%  | 2 | 3 | 5 | 0.04% | 27.40% | LDLAGR DLTDYL MK                   | 3.35 | 1,639.84 |
| ATP | 6018 | PREDIC TED: 88<br>similar to Actin, cytoplasmic 2 (Beta-actin-2)                         | gi 1946763                                                | 41,854.80 | 99.80%  | 2 | 3 | 5 | 0.04% | 27.40% | SYELPD GQVITIG NER                 | 3.84 | 1,790.89 |
| ATP | 6018 | PREDIC TED: 88<br>similar to Actin, cytoplasmic 2 (Beta-actin-2)                         | gi 1946763                                                | 41,854.80 | 99.80%  | 2 | 3 | 5 | 0.04% | 27.40% | TTGIVM DSGDGV THTVPIY EGYALP HAILR | 6.77 | 3,199.61 |
| ATP | 6018 | tyrosine monoxygenase/tryptophan 5-monooxygenase activation protein, epsilon polypeptide | 3-gi 2780619<br>7-gi 367639<br>9-gi 711537<br>79-gi 73586 | 29,157.00 | 100.00% | 4 | 5 | 7 | 0.06% | 29.80% | AAFDDA IAELDTL SEESYK DSTLIM QLLR  | 5.09 | 3,274.60 |
| ATP | 6018 | tyrosine monoxygenase/tryptophan 5-monooxygenase activation protein, epsilon polypeptide | 3-gi 2780619<br>7-gi 367639<br>9-gi 711537<br>79-gi 73586 | 29,157.00 | 100.00% | 4 | 5 | 7 | 0.06% | 29.80% | EAAENS LVAYK                       | 2.15 | 1,194.60 |
| ATP | 6018 | tyrosine monoxygenase/tryptophan 5-monooxygenase activation protein, epsilon polypeptide | 3-gi 2780619<br>7-gi 367639<br>9-gi 711537<br>79-gi 73586 | 29,157.00 | 100.00% | 4 | 5 | 7 | 0.06% | 29.80% | LICCDIL DVLDKH LIPAANT GESK        | 2.25 | 2,581.34 |

|     |      |                                                                                                                                                                                                   |           |         |   |   |   |       |        |                                                    |          |
|-----|------|---------------------------------------------------------------------------------------------------------------------------------------------------------------------------------------------------|-----------|---------|---|---|---|-------|--------|----------------------------------------------------|----------|
| ATP | 6018 | tyrosine 3-gi 2780619<br>monoxy 7,gi 367639<br>genase/tr 9,gi 711537<br>yptophan 79,gi 73586<br>5- 683<br>monoxy<br>genase<br>activation<br>protein,<br>epsilon<br>polypepti<br>de                | 29,157.00 | 100.00% | 4 | 5 | 7 | 0.06% | 29.80% | YLAEFA 3.07<br>TGNDRK                              | 1,384.69 |
| ATP | 6018 | tyrosine 3-gi 1181513<br>monoxy 30,gi 15294<br>genase/tr 1256,gi 154<br>yptophan 426168,gi 7<br>5- 4354028,gi <br>monoxy 82592596<br>genase<br>activation<br>protein,<br>theta<br>polypepti<br>de | 27,747.40 | 99.80%  | 2 | 2 | 2 | 0.02% | 17.60% | AVTEQG 4.99<br>AELSNE<br>ER                        | 1,532.72 |
| ATP | 6018 | tyrosine 3-gi 1181513<br>monoxy 30,gi 15294<br>genase/tr 1256,gi 154<br>yptophan 426168,gi 7<br>5- 4354028,gi <br>monoxy 82592596<br>genase<br>activation<br>protein,<br>theta<br>polypepti<br>de | 27,747.40 | 99.80%  | 2 | 2 | 2 | 0.02% | 17.60% | TAFDEAI 4.69<br>AELDTL<br>NEDSYK<br>DSTLIM<br>QLLR | 3,331.63 |
| ATP | 6018 | Transduc gi 1123623<br>in (beta)- 03,gi 11549<br>like 2 5815                                                                                                                                      | 49,894.00 | 100.00% | 3 | 3 | 3 | 0.03% | 7.85%  | APIVNIGI 3.45<br>ADTGK                             | 1,268.72 |
| ATP | 6018 | Transduc gi 1123623<br>in (beta)- 03,gi 11549<br>like 2 5815                                                                                                                                      | 49,894.00 | 100.00% | 3 | 3 | 3 | 0.03% | 7.85%  | LFHNTP 2.3<br>GYR                                  | 1,104.56 |
| ATP | 6018 | Transduc gi 1123623<br>in (beta)- 03,gi 11549<br>like 2 5815                                                                                                                                      | 49,894.00 | 100.00% | 3 | 3 | 3 | 0.03% | 7.85%  | LQQQLT 4.96<br>QAQEAL<br>K                         | 1,498.82 |
| ATP | 6018 | proteaso gi 6313965<br>me 0,gi 739218<br>activator 36,gi 86821<br>28 alpha 522,gi 9168<br>subunit 0535                                                                                            | 28,675.80 | 100.00% | 4 | 4 | 4 | 0.03% | 19.30% | APLDIPV 2.75<br>PDPVKE<br>K                        | 1,517.86 |
| ATP | 6018 | proteaso gi 6313965<br>me 0,gi 739218<br>activator 36,gi 86821<br>28 alpha 522,gi 9168<br>subunit 0535                                                                                            | 28,675.80 | 100.00% | 4 | 4 | 4 | 0.03% | 19.30% | LEGFHT 1.98<br>QISK                                | 1,159.61 |
| ATP | 6018 | proteaso gi 6313965<br>me 0,gi 739218<br>activator 36,gi 86821<br>28 alpha 522,gi 9168<br>subunit 0535                                                                                            | 28,675.80 | 100.00% | 4 | 4 | 4 | 0.03% | 19.30% | NAYAVL 2.81<br>YDIILK                              | 1,395.79 |
| ATP | 6018 | proteaso gi 6313965<br>me 0,gi 739218<br>activator 36,gi 86821<br>28 alpha 522,gi 9168<br>subunit 0535                                                                                            | 28,675.80 | 100.00% | 4 | 4 | 4 | 0.03% | 19.30% | QLVHEL 1.86<br>DEAEYR                              | 1,501.73 |

|     |      |                                                              |                                                  |            |         |    |    |    |       |        |                          |      |          |
|-----|------|--------------------------------------------------------------|--------------------------------------------------|------------|---------|----|----|----|-------|--------|--------------------------|------|----------|
| ATP | 6018 | Hexokina<br>se 1                                             | gi 1544261<br>22,gi 33332<br>343,gi 6059<br>2784 | 102,191.60 | 100.00% | 11 | 14 | 17 | 0.15% | 14.10% | FNTSDV<br>SAIEK          | 2.74 | 1,210.60 |
| ATP | 6018 | Hexokina<br>se 1                                             | gi 1544261<br>22,gi 33332<br>343,gi 6059<br>2784 | 102,191.60 | 100.00% | 11 | 14 | 17 | 0.15% | 14.10% | GDFIALD<br>LGGSSFR       | 3.56 | 1,454.73 |
| ATP | 6018 | Hexokina<br>se 1                                             | gi 1544261<br>22,gi 33332<br>343,gi 6059<br>2784 | 102,191.60 | 100.00% | 11 | 14 | 17 | 0.15% | 14.10% | GKFNTS<br>DVSAIEK        | 3.11 | 1,395.71 |
| ATP | 6018 | Hexokina<br>se 1                                             | gi 1544261<br>22,gi 33332<br>343,gi 6059<br>2784 | 102,191.60 | 100.00% | 11 | 14 | 17 | 0.15% | 14.10% | HIDLVE<br>GDEGR          | 3.59 | 1,239.60 |
| ATP | 6018 | Hexokina<br>se 1                                             | gi 1544261<br>22,gi 33332<br>343,gi 6059<br>2784 | 102,191.60 | 100.00% | 11 | 14 | 17 | 0.15% | 14.10% | ITPELLT<br>R             | 1.95 | 942.562  |
| ATP | 6018 | Hexokina<br>se 1                                             | gi 1544261<br>22,gi 33332<br>343,gi 6059<br>2784 | 102,191.60 | 100.00% | 11 | 14 | 17 | 0.15% | 14.10% | LSDETL<br>DIMNR          | 3.99 | 1,435.71 |
| ATP | 6018 | Hexokina<br>se 1                                             | gi 1544261<br>22,gi 33332<br>343,gi 6059<br>2784 | 102,191.60 | 100.00% | 11 | 14 | 17 | 0.15% | 14.10% | QIEETLA<br>HFSLTK        | 3.35 | 1,516.80 |
| ATP | 6018 | Hexokina<br>se 1                                             | gi 1544261<br>22,gi 33332<br>343,gi 6059<br>2784 | 102,191.60 | 100.00% | 11 | 14 | 17 | 0.15% | 14.10% | SANLVA<br>ATLGAIL<br>SR  | 3.57 | 1,456.85 |
| ATP | 6018 | Hexokina<br>se 1                                             | gi 1544261<br>22,gi 33332<br>343,gi 6059<br>2784 | 102,191.60 | 100.00% | 11 | 14 | 17 | 0.15% | 14.10% | TIYDKL<br>VDEFSL<br>NSGK | 2.32 | 1,828.93 |
| ATP | 6018 | Hexokina<br>se 1                                             | gi 1544261<br>22,gi 33332<br>343,gi 6059<br>2784 | 102,191.60 | 100.00% | 11 | 14 | 17 | 0.15% | 14.10% | TTVGVD<br>GSLYK          | 2.83 | 1,139.59 |
| ATP | 6018 | Hexokina<br>se 1                                             | gi 1544261<br>22,gi 33332<br>343,gi 6059<br>2784 | 102,191.60 | 100.00% | 11 | 14 | 17 | 0.15% | 14.10% | YLSQIES<br>DRLALL<br>QVR | 3.71 | 1,904.06 |
| ATP | 6018 | RecName<br>:<br>Full=Cad<br>herin-13;<br>Flags:<br>Precursor | gi 1108327<br>87,gi 77567<br>834,gi 7836<br>9244 | 78,179.40  | 100.00% | 5  | 6  | 8  | 0.07% | 8.56%  | DIQGS<br>LQ<br>DIFK      | 3.33 | 1,263.66 |
| ATP | 6018 | RecName<br>:<br>Full=Cad<br>herin-13;<br>Flags:<br>Precursor | gi 1108327<br>87,gi 77567<br>834,gi 7836<br>9244 | 78,179.40  | 100.00% | 5  | 6  | 8  | 0.07% | 8.56%  | INENTGS<br>VSVTR         | 3.89 | 1,276.65 |
| ATP | 6018 | RecName<br>:<br>Full=Cad<br>herin-13;<br>Flags:<br>Precursor | gi 1108327<br>87,gi 77567<br>834,gi 7836<br>9244 | 78,179.40  | 100.00% | 5  | 6  | 8  | 0.07% | 8.56%  | RSIVVSP<br>ILIPENQ<br>R  | 2.79 | 1,721.01 |

|     |      |                                                                                                                             |                                                  |            |         |   |   |   |       |        |                                          |          |
|-----|------|-----------------------------------------------------------------------------------------------------------------------------|--------------------------------------------------|------------|---------|---|---|---|-------|--------|------------------------------------------|----------|
| ATP | 6018 | RecName<br>:<br>Full=Cad<br>herin-13;<br>Flags:<br>Precursor                                                                | gi 1108327<br>87.gi 77567<br>834.gi 7836         | 78,179.40  | 100.00% | 5 | 6 | 8 | 0.07% | 8.56%  | SIVVSPIL 2.51<br>IPENQR                  | 1,564.91 |
| ATP | 6018 | RecName<br>:<br>Full=Cad<br>herin-13;<br>Flags:<br>Precursor                                                                | gi 1108327<br>87.gi 77567<br>834.gi 7836         | 78,179.40  | 100.00% | 5 | 6 | 8 | 0.07% | 8.56%  | TLEGPV 1.96<br>PLEVIVI<br>DQNDNR<br>PIFR | 2,634.43 |
| ATP | 6018 | alpha-<br>actinin 1                                                                                                         | gi 1452864<br>37.gi 77567<br>675.gi 7836<br>9242 | 102,966.00 | 100.00% | 3 | 3 | 4 | 0.03% | 8.18%  | FAIQDIS 3.91<br>VEETSA<br>K              | 1,537.77 |
| ATP | 6018 | alpha-<br>actinin 1                                                                                                         | gi 1452864<br>37.gi 77567<br>675.gi 7836<br>9242 | 102,966.00 | 100.00% | 3 | 3 | 4 | 0.03% | 8.18%  | IDQLEG 4.69<br>DHQLIQ<br>EALIFDN<br>K    | 2,339.19 |
| ATP | 6018 | alpha-<br>actinin 1                                                                                                         | gi 1452864<br>37.gi 77567<br>675.gi 7836<br>9242 | 102,966.00 | 100.00% | 3 | 3 | 4 | 0.03% | 8.18%  | LLETIDQ 4.81<br>LYLEYA<br>K              | 1,711.92 |
| ATP | 6018 | alpha-<br>actinin 1                                                                                                         | gi 1452864<br>37.gi 77567<br>675.gi 7836<br>9242 | 102,966.00 | 100.00% | 3 | 3 | 4 | 0.03% | 8.18%  | LSNRPAF 3<br>MPSEGR                      | 1,477.72 |
| ATP | 6018 | alpha-<br>actinin 1                                                                                                         | gi 1452864<br>37.gi 77567<br>675.gi 7836<br>9242 | 102,966.00 | 100.00% | 3 | 3 | 4 | 0.03% | 8.18%  | TINEVEN 2.69<br>QILTR                    | 1,429.76 |
| ATP | 6018 | PREDIC<br>TED:<br>similar to<br>Heteroge<br>neous<br>nuclear<br>ribonucle<br>oprotein<br>H<br>(hnRNP<br>H)<br>isoform<br>26 | gi 1946686<br>11                                 | 49,211.80  | 100.00% | 3 | 3 | 4 | 0.03% | 11.10% | ATENDI 4.09<br>YNFFSPL<br>NPVR           | 1,996.98 |
| ATP | 6018 | PREDIC<br>TED:<br>similar to<br>Heteroge<br>neous<br>nuclear<br>ribonucle<br>oprotein<br>H<br>(hnRNP<br>H)<br>isoform<br>26 | gi 1946686<br>11                                 | 49,211.80  | 100.00% | 3 | 3 | 4 | 0.03% | 11.10% | HTGPNS 4.45<br>PDTAND<br>GFVR            | 1,684.77 |

|     |      |                                                                                                                                                                        |                                          |           |         |   |   |    |       |        |                                        |      |          |
|-----|------|------------------------------------------------------------------------------------------------------------------------------------------------------------------------|------------------------------------------|-----------|---------|---|---|----|-------|--------|----------------------------------------|------|----------|
| ATP | 6018 | PREDIC<br>TED:<br>similar to<br>Heteroge<br>neous<br>nuclear<br>ribonucle<br>oprotein<br>H<br>(hnRNP<br>H)<br>isoform<br>26                                            | gi 1946686<br>11                         | 49,211.80 | 100.00% | 3 | 3 | 4  | 0.03% | 11.10% | STGEAF<br>VQFASQ<br>EIAEK              | 3.27 | 1,841.89 |
| ATP | 6018 | PREDIC<br>TED:<br>similar to<br>program<br>med cell<br>death 8<br>isoform 2                                                                                            | gi 7665865<br>7                          | 66,854.50 | 100.00% | 4 | 4 | 4  | 0.03% | 10.60% | ASGTEVI<br>QLFPEK<br>GNMGK             | 3.55 | 1,921.97 |
| ATP | 6018 | PREDIC<br>TED:<br>similar to<br>program<br>med cell<br>death 8<br>isoform 2                                                                                            | gi 7665865<br>7                          | 66,854.50 | 100.00% | 4 | 4 | 4  | 0.03% | 10.60% | ATSSALE<br>GEPEPQ<br>VR                | 2.84 | 1,570.77 |
| ATP | 6018 | PREDIC<br>TED:<br>similar to<br>program<br>med cell<br>death 8<br>isoform 2                                                                                            | gi 7665865<br>7                          | 66,854.50 | 100.00% | 4 | 4 | 4  | 0.03% | 10.60% | ISGLGLT<br>PEEK                        | 3.22 | 1,143.63 |
| ATP | 6018 | PREDIC<br>TED:<br>similar to<br>program<br>med cell<br>death 8<br>isoform 2                                                                                            | gi 7665865<br>7                          | 66,854.50 | 100.00% | 4 | 4 | 4  | 0.03% | 10.60% | KVETDH<br>IVAAVG<br>LEPNVE<br>LAK      | 2.74 | 2,232.22 |
| ATP | 6018 | RecName<br>:<br>Full=Cad<br>herin-2;<br>AltName:<br>Full=Neu<br>ral<br>cadherin;<br>Short=N-<br>cadherin;<br>AltName:<br>CD_antig<br>en=CD32<br>5; Flags:<br>Precursor | gi 115421.g<br>i 19467806<br>8,gi 664894 | 96,830.40 | 100.00% | 7 | 9 | 13 | 0.11% | 18.80% | FAIQTDP<br>NSNDGL<br>VTVVKPI<br>DFETNR | 3.08 | 2,890.46 |

|     |      |                                                                                                                                                                                    |           |         |   |   |    |       |        |                                   |          |
|-----|------|------------------------------------------------------------------------------------------------------------------------------------------------------------------------------------|-----------|---------|---|---|----|-------|--------|-----------------------------------|----------|
| ATP | 6018 | RecName gi 115421.g<br>:<br>Full=Cad<br>herin-2;<br>AltName:<br>Full=Neu<br>ral<br>cadherin;<br>Short=N-<br>cadherin;<br>AltName:<br>CD_antig<br>en=CD32<br>5; Flags:<br>Precursor | 96,830.40 | 100.00% | 7 | 9 | 13 | 0.11% | 18.80% | FLEAGIY 4.08<br>EVPIITD<br>SGNPPK | 2,273.21 |
| ATP | 6018 | RecName gi 115421.g<br>:<br>Full=Cad<br>herin-2;<br>AltName:<br>Full=Neu<br>ral<br>cadherin;<br>Short=N-<br>cadherin;<br>AltName:<br>CD_antig<br>en=CD32<br>5; Flags:<br>Precursor | 96,830.40 | 100.00% | 7 | 9 | 13 | 0.11% | 18.80% | QLLIDPE 2.18<br>DDVRDN<br>ILK     | 1,896.01 |
| ATP | 6018 | RecName gi 115421.g<br>:<br>Full=Cad<br>herin-2;<br>AltName:<br>Full=Neu<br>ral<br>cadherin;<br>Short=N-<br>cadherin;<br>AltName:<br>CD_antig<br>en=CD32<br>5; Flags:<br>Precursor | 96,830.40 | 100.00% | 7 | 9 | 13 | 0.11% | 18.80% | RLDERPI 2.47<br>HAEPQY<br>PVR     | 1,976.05 |

|     |      |                                                                                                                                                                        |                                                              |           |         |   |   |    |       |        |                                                         |      |          |
|-----|------|------------------------------------------------------------------------------------------------------------------------------------------------------------------------|--------------------------------------------------------------|-----------|---------|---|---|----|-------|--------|---------------------------------------------------------|------|----------|
| ATP | 6018 | RecName<br>:<br>Full=Cad<br>herin-2;<br>AltName:<br>Full=Neu<br>ral<br>cadherin;<br>Short=N-<br>cadherin;<br>AltName:<br>CD_antig<br>en=CD32<br>5; Flags:<br>Precursor | gi 115421.g<br>:<br>i 19467806<br>8,gi 664894                | 96,830.40 | 100.00% | 7 | 9 | 13 | 0.11% | 18.80% | SAAPHP<br>GDIGDFI<br>NEGLK                              | 5.3  | 1,837.91 |
| ATP | 6018 | RecName<br>:<br>Full=Cad<br>herin-2;<br>AltName:<br>Full=Neu<br>ral<br>cadherin;<br>Short=N-<br>cadherin;<br>AltName:<br>CD_antig<br>en=CD32<br>5; Flags:<br>Precursor | gi 115421.g<br>:<br>i 19467806<br>8,gi 664894                | 96,830.40 | 100.00% | 7 | 9 | 13 | 0.11% | 18.80% | YDEEGG<br>GEEDQD<br>YDLSQL<br>QQPDTV<br>EPDAIKP<br>VGIR | 5.21 | 3,905.78 |
| ATP | 6018 | RecName<br>:<br>Full=Cad<br>herin-2;<br>AltName:<br>Full=Neu<br>ral<br>cadherin;<br>Short=N-<br>cadherin;<br>AltName:<br>CD_antig<br>en=CD32<br>5; Flags:<br>Precursor | gi 115421.g<br>:<br>i 19467806<br>8,gi 664894                | 96,830.40 | 100.00% | 7 | 9 | 13 | 0.11% | 18.80% | YSVTGP<br>GADQPP<br>TGIFIINP<br>ISGQLSV<br>TKPLDR       | 4.91 | 3,438.83 |
| ATP | 6018 | F1-F0-<br>ATPase                                                                                                                                                       | gi 162701.g<br>:<br>i 231615,gi <br>28603752,g<br>i 74268301 | 8,303.10  | 99.80%  | 2 | 2 | 10 | 0.09% | 35.20% | ELAEAQ<br>EDTILK                                        | 4.34 | 1,359.70 |
| ATP | 6018 | F1-F0-<br>ATPase                                                                                                                                                       | gi 162701.g<br>:<br>i 231615,gi <br>28603752,g<br>i 74268301 | 8,303.10  | 99.80%  | 2 | 2 | 10 | 0.09% | 35.20% | YSALFL<br>GMAYG<br>AK                                   | 4.08 | 1,407.70 |

|     |      |                                                                        |                           |           |         |    |    |    |       |        |                                                                       |          |
|-----|------|------------------------------------------------------------------------|---------------------------|-----------|---------|----|----|----|-------|--------|-----------------------------------------------------------------------|----------|
| ATP | 6018 | PREDIC TED:<br>similar to ATP-binding cassette, sub-family B, member 7 | gi 194680502              | 83,040.70 | 100.00% | 4  | 4  | 5  | 0.04% | 13.30% | ADNDAG 4.62<br>NAAIDSL<br>LNYETV<br>K                                 | 2,094.00 |
| ATP | 6018 | PREDIC TED:<br>similar to ATP-binding cassette, sub-family B, member 7 | gi 194680502              | 83,040.70 | 100.00% | 4  | 4  | 5  | 0.04% | 13.30% | AMASPL 3.74<br>QITPQTA<br>TVAFDN<br>VHFEYIE<br>GQK                    | 3,222.58 |
| ATP | 6018 | PREDIC TED:<br>similar to ATP-binding cassette, sub-family B, member 7 | gi 194680502              | 83,040.70 | 100.00% | 4  | 4  | 5  | 0.04% | 13.30% | AVGVVP 5.39<br>QDAVLF<br>HNTIYY<br>NLLYGNI<br>SASPEEV<br>YAVAK        | 4,025.07 |
| ATP | 6018 | PREDIC TED:<br>similar to ATP-binding cassette, sub-family B, member 7 | gi 194680502              | 83,040.70 | 100.00% | 4  | 4  | 5  | 0.04% | 13.30% | QALIDM 3.33<br>NTLFTLL<br>K                                           | 1,636.90 |
| ATP | 6018 | P4HB protein                                                           | gi 148878430,gi 152941196 | 57,187.70 | 100.00% | 11 | 14 | 17 | 0.15% | 33.50% | FLESGG 5.23<br>QDGAGD<br>DDDLED<br>LEEAEPP<br>DLEEDD<br>DQKAVK<br>DEL | 4,394.84 |
| ATP | 6018 | P4HB protein                                                           | gi 148878430,gi 152941196 | 57,187.70 | 100.00% | 11 | 14 | 17 | 0.15% | 33.50% | GNFDEA 3.47<br>LAAHK                                                  | 1,172.57 |
| ATP | 6018 | P4HB protein                                                           | gi 148878430,gi 152941196 | 57,187.70 | 100.00% | 11 | 14 | 17 | 0.15% | 33.50% | HNQLPL 3.66<br>VIEFTEQ<br>TAPK                                        | 1,965.04 |
| ATP | 6018 | P4HB protein                                                           | gi 148878430,gi 152941196 | 57,187.70 | 100.00% | 11 | 14 | 17 | 0.15% | 33.50% | ILEFFGL 2.57<br>K                                                     | 966.566  |
| ATP | 6018 | P4HB protein                                                           | gi 148878430,gi 152941196 | 57,187.70 | 100.00% | 11 | 14 | 17 | 0.15% | 33.50% | LITLEEE 2.8<br>MTK                                                    | 1,222.62 |
| ATP | 6018 | P4HB protein                                                           | gi 148878430,gi 152941196 | 57,187.70 | 100.00% | 11 | 14 | 17 | 0.15% | 33.50% | NFEEVA 3.75<br>FDEKK                                                  | 1,355.65 |
| ATP | 6018 | P4HB protein                                                           | gi 148878430,gi 152941196 | 57,187.70 | 100.00% | 11 | 14 | 17 | 0.15% | 33.50% | QFLLA 4.91<br>EAIDDIP<br>FGITSNS<br>DVFSK                             | 2,698.36 |
| ATP | 6018 | P4HB protein                                                           | gi 148878430,gi 152941196 | 57,187.70 | 100.00% | 11 | 14 | 17 | 0.15% | 33.50% | THILLFL 2.58<br>PK                                                    | 1,081.68 |



|     |      |                                                                             |                                                                  |           |         |    |    |    |       |        |                                        |          |
|-----|------|-----------------------------------------------------------------------------|------------------------------------------------------------------|-----------|---------|----|----|----|-------|--------|----------------------------------------|----------|
| ATP | 6018 | P4HB<br>protein                                                             | gi 1488784<br>30,gi 15294<br>1196                                | 57,187.70 | 100.00% | 11 | 14 | 17 | 0.15% | 33.50% | VDATEE 4.28<br>SDLAQQ<br>YGVR          | 1,780.83 |
| ATP | 6018 | P4HB<br>protein                                                             | gi 1488784<br>30,gi 15294<br>1196                                | 57,187.70 | 100.00% | 11 | 14 | 17 | 0.15% | 33.50% | YKPESD 4.44<br>ELTAEK                  | 1,409.68 |
| ATP | 6018 | P4HB<br>protein                                                             | gi 1488784<br>30,gi 15294<br>1196                                | 57,187.70 | 100.00% | 11 | 14 | 17 | 0.15% | 33.50% | YQLDKD 3.53<br>GVVLFK                  | 1,424.78 |
| ATP | 6018 | RecName<br>:<br>Full=Ras-<br>related<br>protein<br>Rab-11B                  | gi 1088609<br>22,gi 75773<br>827,gi 7836<br>9332                 | 24,471.00 | 100.00% | 4  | 4  | 7  | 0.06% | 24.80% | GAVGAL 4.1<br>LVYDIA<br>K              | 1,289.75 |
| ATP | 6018 | RecName<br>:<br>Full=Ras-<br>related<br>protein<br>Rab-11B                  | gi 1088609<br>22,gi 75773<br>827,gi 7836<br>9332                 | 24,471.00 | 100.00% | 4  | 4  | 7  | 0.06% | 24.80% | HLTYEN 2.46<br>VER                     | 1,160.57 |
| ATP | 6018 | RecName<br>:<br>Full=Ras-<br>related<br>protein<br>Rab-11B                  | gi 1088609<br>22,gi 75773<br>827,gi 7836<br>9332                 | 24,471.00 | 100.00% | 4  | 4  | 7  | 0.06% | 24.80% | NNLSFIE 3.95<br>TSALDS<br>TNVEEA<br>FK | 2,329.12 |
| ATP | 6018 | RecName<br>:<br>Full=Ras-<br>related<br>protein<br>Rab-11B                  | gi 1088609<br>22,gi 75773<br>827,gi 7836<br>9332                 | 24,471.00 | 100.00% | 4  | 4  | 7  | 0.06% | 24.80% | VVLIGDS 3.29<br>GVGK                   | 1,043.61 |
| ATP | 6018 | SEPT11<br>protein                                                           | gi 1260108<br>11,gi 12672<br>3403,gi 162<br>416046               | 48,974.60 | 100.00% | 3  | 3  | 4  | 0.03% | 9.88%  | AAAQLL 5.8<br>QSQAQQ<br>SGAQQT<br>K    | 1,957.01 |
| ATP | 6018 | SEPT11<br>protein                                                           | gi 1260108<br>11,gi 12672<br>3403,gi 162<br>416046               | 48,974.60 | 100.00% | 3  | 3  | 4  | 0.03% | 9.88%  | FESDPAT 2.16<br>HNEPGV<br>R            | 1,555.71 |
| ATP | 6018 | SEPT11<br>protein                                                           | gi 1260108<br>11,gi 12672<br>3403,gi 162<br>416046               | 48,974.60 | 100.00% | 3  | 3  | 4  | 0.03% | 9.88%  | VNIPIIA 2.45<br>K                      | 980.6504 |
| ATP | 6018 | translocas<br>e of inner<br>mitochon<br>drial<br>membran<br>e 50<br>homolog | gi 1106656<br>40,gi 74268<br>127,gi 7804<br>2512,gi 833<br>05921 | 40,747.80 | 100.00% | 4  | 4  | 4  | 0.03% | 15.00% | IPDEFDN 4.44<br>DPILVQQ<br>LR          | 1,911.98 |
| ATP | 6018 | translocas<br>e of inner<br>mitochon<br>drial<br>membran<br>e 50<br>homolog | gi 1106656<br>40,gi 74268<br>127,gi 7804<br>2512,gi 833<br>05921 | 40,747.80 | 100.00% | 4  | 4  | 4  | 0.03% | 15.00% | QNLFFSS 2.47<br>LTSR                   | 1,299.67 |
| ATP | 6018 | translocas<br>e of inner<br>mitochon<br>drial<br>membran<br>e 50<br>homolog | gi 1106656<br>40,gi 74268<br>127,gi 7804<br>2512,gi 833<br>05921 | 40,747.80 | 100.00% | 4  | 4  | 4  | 0.03% | 15.00% | TVLEHY 2.58<br>ALEEDP<br>LEAFK         | 2,004.00 |

|     |      |                                                                   |                                                  |            |         |   |   |   |       |        |                                       |      |          |
|-----|------|-------------------------------------------------------------------|--------------------------------------------------|------------|---------|---|---|---|-------|--------|---------------------------------------|------|----------|
| ATP | 6018 | translocase of inner mitochondrial membrane 50 homolog            | gi 110665640,gi 74268127,gi 78042512,gi 83305921 | 40,747.80  | 100.00% | 4 | 4 | 4 | 0.03% | 15.00% | VLLDLS<br>AFLK                        | 3.03 | 1,118.68 |
| ATP | 6018 | PREDICTED: ATP-binding cassette, sub-family B (MDR/TAP), member 1 | gi 194685301                                     | 144,522.00 | 100.00% | 5 | 6 | 6 | 0.05% | 6.31%  | GNELEL<br>ENTPGE<br>SLSK              | 4.44 | 1,716.83 |
| ATP | 6018 | PREDICTED: ATP-binding cassette, sub-family B (MDR/TAP), member 1 | gi 194685301                                     | 144,522.00 | 100.00% | 5 | 6 | 6 | 0.05% | 6.31%  | ILLLDEA<br>TSALDT<br>ESEAVV<br>QAALDK | 5.05 | 2,615.37 |
| ATP | 6018 | PREDICTED: ATP-binding cassette, sub-family B (MDR/TAP), member 1 | gi 194685301                                     | 144,522.00 | 100.00% | 5 | 6 | 6 | 0.05% | 6.31%  | LPNKFD<br>TLVGER                      | 2.61 | 1,388.75 |
| ATP | 6018 | PREDICTED: ATP-binding cassette, sub-family B (MDR/TAP), member 1 | gi 194685301                                     | 144,522.00 | 100.00% | 5 | 6 | 6 | 0.05% | 6.31%  | LYDPTE<br>GMVSIQ<br>GQDIR             | 3.41 | 1,924.90 |
| ATP | 6018 | PREDICTED: ATP-binding cassette, sub-family B (MDR/TAP), member 1 | gi 194685301                                     | 144,522.00 | 100.00% | 5 | 6 | 6 | 0.05% | 6.31%  | YGREDV<br>TMDEIQ<br>K                 | 3.36 | 1,599.73 |
| ATP | 6018 | AFG3 ATPase family gene 3-like 2                                  | gi 114051125,gi 118572819,gi 86820707            | 89,372.80  | 100.00% | 6 | 6 | 7 | 0.06% | 9.44%  | GLGYAQ<br>YLPR                        | 3.16 | 1,137.61 |

|     |      |                                                                                                               |                                                                                                                                                                           |           |         |   |   |   |       |        |                                                      |          |
|-----|------|---------------------------------------------------------------------------------------------------------------|---------------------------------------------------------------------------------------------------------------------------------------------------------------------------|-----------|---------|---|---|---|-------|--------|------------------------------------------------------|----------|
| ATP | 6018 | AFG3<br>ATPase<br>family<br>gene 3-<br>like 2                                                                 | gi 1140511<br>25,gi 11857<br>2819,gi 868<br>20707                                                                                                                         | 89,372.80 | 100.00% | 6 | 6 | 7 | 0.06% | 9.44%  | GMGGLF 3.45<br>SVGETT<br>AK                          | 1,370.66 |
| ATP | 6018 | AFG3<br>ATPase<br>family<br>gene 3-<br>like 2                                                                 | gi 1140511<br>25,gi 11857<br>2819,gi 868<br>20707                                                                                                                         | 89,372.80 | 100.00% | 6 | 6 | 7 | 0.06% | 9.44%  | NLETLQ 3.47<br>QELGIEG<br>ENR                        | 1,842.92 |
| ATP | 6018 | AFG3<br>ATPase<br>family<br>gene 3-<br>like 2                                                                 | gi 1140511<br>25,gi 11857<br>2819,gi 868<br>20707                                                                                                                         | 89,372.80 | 100.00% | 6 | 6 | 7 | 0.06% | 9.44%  | VGQISFD 3.31<br>LPR                                  | 1,131.62 |
| ATP | 6018 | AFG3<br>ATPase<br>family<br>gene 3-<br>like 2                                                                 | gi 1140511<br>25,gi 11857<br>2819,gi 868<br>20707                                                                                                                         | 89,372.80 | 100.00% | 6 | 6 | 7 | 0.06% | 9.44%  | VSEEIFF 3.13<br>GR                                   | 1,083.55 |
| ATP | 6018 | AFG3<br>ATPase<br>family<br>gene 3-<br>like 2                                                                 | gi 1140511<br>25,gi 11857<br>2819,gi 868<br>20707                                                                                                                         | 89,372.80 | 100.00% | 6 | 6 | 7 | 0.06% | 9.44%  | VTQSAY 3.79<br>AQVQF<br>GMNEK                        | 1,929.94 |
| ATP | 6018 | ATP<br>synthase,<br>H+<br>transporti<br>ng,<br>mitochon<br>drial F1<br>complex,<br>gamma<br>polypepti<br>de 1 | gi 1154954<br>11,gi 15842<br>8988,gi 158<br>428995,gi 1<br>58429005,gi <br>15842901<br>2,gi 158429<br>019,gi 1584<br>29026,gi 15<br>8431072,gi <br>543874,gi 7<br>4268047 | 30,124.50 | 100.00% | 3 | 3 | 5 | 0.04% | 28.30% | NYQEYS 4.42<br>LANIYY<br>SLK                         | 1,981.99 |
| ATP | 6018 | ATP<br>synthase,<br>H+<br>transporti<br>ng,<br>mitochon<br>drial F1<br>complex,<br>gamma<br>polypepti<br>de 1 | gi 1154954<br>11,gi 15842<br>8988,gi 158<br>428995,gi 1<br>58429005,gi <br>15842901<br>2,gi 158429<br>019,gi 1584<br>29026,gi 15<br>8431072,gi <br>543874,gi 7<br>4268047 | 30,124.50 | 100.00% | 3 | 3 | 5 | 0.04% | 28.30% | RPPTFG 4.31<br>DASVIAL<br>ELLNSG<br>YEFDEG<br>SIIFNR | 3,427.72 |
| ATP | 6018 | ATP<br>synthase,<br>H+<br>transporti<br>ng,<br>mitochon<br>drial F1<br>complex,<br>gamma<br>polypepti<br>de 1 | gi 1154954<br>11,gi 15842<br>8988,gi 158<br>428995,gi 1<br>58429005,gi <br>15842901<br>2,gi 158429<br>019,gi 1584<br>29026,gi 15<br>8431072,gi <br>543874,gi 7<br>4268047 | 30,124.50 | 100.00% | 3 | 3 | 5 | 0.04% | 28.30% | TEEKPIF 7.18<br>SLDTISS<br>AESMSIY<br>DDIDAD<br>VLR  | 3,376.60 |
| ATP | 6018 | transgelin<br>2                                                                                               | gi 5985829<br>5,gi 618888<br>74,gi 73919<br>851                                                                                                                           | 22,408.90 | 100.00% | 3 | 4 | 6 | 0.05% | 18.60% | QMEQIS 3.74<br>QFLQAA<br>ER                          | 1,694.82 |



|     |      |                                                                         |                                                                                  |           |         |   |   |   |       |        |                                                   |          |
|-----|------|-------------------------------------------------------------------------|----------------------------------------------------------------------------------|-----------|---------|---|---|---|-------|--------|---------------------------------------------------|----------|
| ATP | 6018 | PREDICTED:<br>similar to<br>transferri<br>n<br>receptor                 | gi 1198796<br>52                                                                 | 85,420.40 | 100.00% | 5 | 5 | 7 | 0.06% | 7.28%  | VEYHLL 3<br>SPYVSPR                               | 1,559.82 |
| ATP | 6018 | PREDICTED:<br>similar to<br>transferri<br>n<br>receptor                 | gi 1198796<br>52                                                                 | 85,420.40 | 100.00% | 5 | 5 | 7 | 0.06% | 7.28%  | VSASPLL 2.66<br>YSLIEK                            | 1,419.81 |
| ATP | 6018 | Leucine<br>rich<br>repeat<br>containin<br>g 8<br>family,<br>member<br>A | gi 1153047<br>67,gi 11600<br>3833                                                | 93,997.70 | 100.00% | 4 | 4 | 4 | 0.03% | 8.64%  | ALSETV 2.65<br>VEESDP<br>KPAFSK                   | 1,933.98 |
| ATP | 6018 | Leucine<br>rich<br>repeat<br>containin<br>g 8<br>family,<br>member<br>A | gi 1153047<br>67,gi 11600<br>3833                                                | 93,997.70 | 100.00% | 4 | 4 | 4 | 0.03% | 8.64%  | IEAPALA 2.33<br>FLR                               | 1,100.65 |
| ATP | 6018 | Leucine<br>rich<br>repeat<br>containin<br>g 8<br>family,<br>member<br>A | gi 1153047<br>67,gi 11600<br>3833                                                | 93,997.70 | 100.00% | 4 | 4 | 4 | 0.03% | 8.64%  | MANLTE 3.33<br>LELIR                              | 1,318.70 |
| ATP | 6018 | Leucine<br>rich<br>repeat<br>containin<br>g 8<br>family,<br>member<br>A | gi 1153047<br>67,gi 11600<br>3833                                                | 93,997.70 | 100.00% | 4 | 4 | 4 | 0.03% | 8.64%  | YLDLSH 2.93<br>NNLTF<br>ADIGLLQ<br>SLQNL<br>VTANR | 3,424.82 |
| ATP | 6018 | TM9SF1<br>protein                                                       | gi 1340258<br>88,gi 13994<br>9144,gi 162<br>416063                               | 69,145.70 | 99.90%  | 2 | 2 | 2 | 0.02% | 3.47%  | SLSLGEV 3.22<br>LDGDR                             | 1,260.64 |
| ATP | 6018 | TM9SF1<br>protein                                                       | gi 1340258<br>88,gi 13994<br>9144,gi 162<br>416063                               | 69,145.70 | 99.90%  | 2 | 2 | 2 | 0.02% | 3.47%  | SLSLGEV 4.88<br>LDGDRM<br>AESLYEI<br>R            | 2,369.17 |
| ATP | 6018 | Caveolin<br>2                                                           | gi 1572792<br>19,gi 38322<br>700,gi 5151<br>2145,gi 561<br>19130,gi 66<br>774044 | 18,142.30 | 100.00% | 3 | 3 | 6 | 0.05% | 27.20% | ADVQLF 3.23<br>MDDDSY<br>SR                       | 1,677.71 |
| ATP | 6018 | Caveolin<br>2                                                           | gi 1572792<br>19,gi 38322<br>700,gi 5151<br>2145,gi 561<br>19130,gi 66<br>774044 | 18,142.30 | 100.00% | 3 | 3 | 6 | 0.05% | 27.20% | SFSSVSL 3.18<br>QLSHD                             | 1,306.63 |

|     |      |                                                              |                                                              |            |         |   |    |    |       |        |                                 |          |
|-----|------|--------------------------------------------------------------|--------------------------------------------------------------|------------|---------|---|----|----|-------|--------|---------------------------------|----------|
| ATP | 6018 | Caveolin 2                                                   | gi 157279219,gi 38322700,gi 51512145,gi 56119130,gi 66774044 | 18,142.30  | 100.00% | 3 | 3  | 6  | 0.05% | 27.20% | VGFEDVI 2.93<br>AEPVST<br>HSFDK | 1,976.96 |
| ATP | 6018 | solute carrier family 29 (nucleoside transporters), member 1 | gi 110331885,gi 73587285,gi 77735743                         | 49,866.60  | 99.80%  | 2 | 3  | 3  | 0.03% | 6.80%  | DIQASAS 3.72<br>PLAPSPE<br>R    | 1,538.78 |
| ATP | 6018 | solute carrier family 29 (nucleoside transporters), member 1 | gi 110331885,gi 73587285,gi 77735743                         | 49,866.60  | 99.80%  | 2 | 3  | 3  | 0.03% | 6.80%  | LEGPGE 4.15<br>QETKLD<br>LISK   | 1,756.93 |
| ATP | 6018 | calcium binding protein P22                                  | gi 115497570,gi 122142989,gi 152941188,gi 74354201           | 22,425.20  | 100.00% | 3 | 3  | 3  | 0.03% | 16.40% | ASTLLR 3.45<br>DEELEEI<br>KK    | 1,773.96 |
| ATP | 6018 | calcium binding protein P22                                  | gi 115497570,gi 122142989,gi 152941188,gi 74354201           | 22,425.20  | 100.00% | 3 | 3  | 3  | 0.03% | 16.40% | EDFQRIP 4.51<br>ELAINPL<br>GDR  | 1,983.03 |
| ATP | 6018 | calcium binding protein P22                                  | gi 115497570,gi 122142989,gi 152941188,gi 74354201           | 22,425.20  | 100.00% | 3 | 3  | 3  | 0.03% | 16.40% | IPELAINP 3.58<br>LGDR           | 1,307.73 |
| ATP | 6018 | ACTN4 protein                                                | gi 146186472,gi 148238040,gi 162416099                       | 104,913.30 | 100.00% | 9 | 10 | 11 | 0.09% | 16.50% | ETTDTD 3.46<br>TADQVI<br>ASFK   | 1,741.81 |
| ATP | 6018 | ACTN4 protein                                                | gi 146186472,gi 148238040,gi 162416099                       | 104,913.30 | 100.00% | 9 | 10 | 11 | 0.09% | 16.50% | FAIQDIS 3.91<br>VEETSA<br>K     | 1,537.77 |
| ATP | 6018 | ACTN4 protein                                                | gi 146186472,gi 148238040,gi 162416099                       | 104,913.30 | 100.00% | 9 | 10 | 11 | 0.09% | 16.50% | KDDPVT 3.86<br>NLNNAF<br>EVAEK  | 1,903.94 |
| ATP | 6018 | ACTN4 protein                                                | gi 146186472,gi 148238040,gi 162416099                       | 104,913.30 | 100.00% | 9 | 10 | 11 | 0.09% | 16.50% | LSNRPAF 3.44<br>MPSEGK          | 1,449.72 |
| ATP | 6018 | ACTN4 protein                                                | gi 146186472,gi 148238040,gi 162416099                       | 104,913.30 | 100.00% | 9 | 10 | 11 | 0.09% | 16.50% | MOPYQG 2.93<br>PDAVPG<br>ALDYK  | 1,808.85 |
| ATP | 6018 | ACTN4 protein                                                | gi 146186472,gi 148238040,gi 162416099                       | 104,913.30 | 100.00% | 9 | 10 | 11 | 0.09% | 16.50% | MLDAED 4.32<br>IVNTARP<br>DEK   | 1,832.87 |

|     |      |                                                |                                        |            |         |   |    |    |       |        |                                                   |          |
|-----|------|------------------------------------------------|----------------------------------------|------------|---------|---|----|----|-------|--------|---------------------------------------------------|----------|
| ATP | 6018 | ACTN4 protein                                  | gi 146186472,gi 148238040,gi 162416099 | 104,913.30 | 100.00% | 9 | 10 | 11 | 0.09% | 16.50% | SIVDYKP 5.14<br>NLDLLE<br>QQHQLI<br>QEALIFD<br>NK | 3,324.75 |
| ATP | 6018 | ACTN4 protein                                  | gi 146186472,gi 148238040,gi 162416099 | 104,913.30 | 100.00% | 9 | 10 | 11 | 0.09% | 16.50% | TINEVEN 2.69<br>QILTR                             | 1,429.76 |
| ATP | 6018 | ACTN4 protein                                  | gi 146186472,gi 148238040,gi 162416099 | 104,913.30 | 100.00% | 9 | 10 | 11 | 0.09% | 16.50% | VLAVNQ 2.24<br>ENEHLM<br>EDYER                    | 2,104.96 |
| ATP | 6018 | Chromosome 9 open reading frame 46 ortholog    | gi 74354529,gi 77735799                | 17,091.30  | 99.80%  | 2 | 3  | 4  | 0.03% | 15.60% | GMITFES 3.12<br>LEK                               | 1,170.57 |
| ATP | 6018 | Chromosome 9 open reading frame 46 ortholog    | gi 74354529,gi 77735799                | 17,091.30  | 99.80%  | 2 | 3  | 4  | 0.03% | 15.60% | MKGAEAE 4.2<br>NILETEK                            | 1,507.73 |
| ATP | 6018 | STAT1 protein 44                               | gi 154426144                           | 86,914.50  | 99.80%  | 2 | 2  | 2  | 0.02% | 3.35%  | ELSAVTF 2.77<br>PDIIR                             | 1,360.75 |
| ATP | 6018 | STAT1 protein 44                               | gi 154426144                           | 86,914.50  | 99.80%  | 2 | 2  | 2  | 0.02% | 3.35%  | VMAAEN 3.84<br>IPENPLK                            | 1,441.74 |
| ATP | 6018 | non-classical MHC class I antigen              | gi 157785629,gi 83638606               | 38,884.20  | 99.80%  | 2 | 2  | 3  | 0.03% | 21.90% | DYLALN 3.09<br>EDLR                               | 1,221.61 |
| ATP | 6018 | non-classical MHC class I antigen              | gi 157785629,gi 83638606               | 38,884.20  | 99.80%  | 2 | 2  | 3  | 0.03% | 21.90% | NGEDQT 3.05<br>QDMELV<br>ETRPSG<br>DGTFQK         | 2,698.19 |
| ATP | 6018 | non-classical MHC class I antigen              | gi 157785629,gi 83638606               | 38,884.20  | 99.80%  | 2 | 2  | 3  | 0.03% | 21.90% | SWTAAD 4.15<br>TAAQIT<br>K                        | 1,363.69 |
| ATP | 6018 | non-classical MHC class I antigen              | gi 157785629,gi 83638606               | 38,884.20  | 99.80%  | 2 | 2  | 3  | 0.03% | 21.90% | VQHEGL 3.86<br>QEPLTLR                            | 1,519.82 |
| ATP | 6018 | non-classical MHC class I antigen              | gi 157785629,gi 83638606               | 38,884.20  | 99.80%  | 2 | 2  | 3  | 0.03% | 21.90% | YFLTAV 3.3<br>SRPGLG<br>EPR                       | 1,662.90 |
| ATP | 6018 | LOC53976 protein 4098                          | gi 133778097,gi 157074098              | 83,155.80  | 99.80%  | 2 | 2  | 2  | 0.02% | 4.62%  | AVGFSS 2.67<br>GTENPH<br>GVK                      | 1,486.73 |
| ATP | 6018 | LOC53976 protein 4098                          | gi 133778097,gi 157074098              | 83,155.80  | 99.80%  | 2 | 2  | 2  | 0.02% | 4.62%  | LYSEEQP 2.74<br>QEAVPH<br>LEAALR                  | 2,180.10 |
| ATP | 6018 | v-ral simian leukemia viral oncogene homolog B | gi 146231722,gi 147900776,gi 148878477 | 23,421.00  | 99.80%  | 2 | 3  | 3  | 0.03% | 13.60% | AEEDKIP 3.38<br>LLVVG<br>K                        | 1,524.86 |

|     |      |                                                                                                                                                                                                                                   |                                                               |           |         |   |   |   |       |        |                              |          |
|-----|------|-----------------------------------------------------------------------------------------------------------------------------------------------------------------------------------------------------------------------------------|---------------------------------------------------------------|-----------|---------|---|---|---|-------|--------|------------------------------|----------|
| ATP | 6018 | v-ral<br>simian<br>leukemia<br>viral<br>oncogene<br>homolog<br>B                                                                                                                                                                  | gi 1462317<br>22,gi 14790<br>0776,gi 148<br>878477            | 23,421.00 | 99.80%  | 2 | 3 | 3 | 0.03% | 13.60% | ANVDKV 4.05<br>FFDLMR        | 1,470.74 |
| ATP | 6018 | v-ral<br>simian<br>leukemia<br>viral<br>oncogene<br>homolog<br>B                                                                                                                                                                  | gi 1462317<br>22,gi 14790<br>0776,gi 148<br>878477            | 23,421.00 | 99.80%  | 2 | 3 | 3 | 0.03% | 13.60% | VFFDLM 2.1<br>R              | 943.4707 |
| ATP | 6018 | v-ral<br>simian<br>leukemia<br>viral<br>oncogene<br>homolog<br>B                                                                                                                                                                  | gi 1462317<br>22,gi 14790<br>0776,gi 148<br>878477            | 23,421.00 | 99.80%  | 2 | 3 | 3 | 0.03% | 13.60% | VKAEED 2.9<br>KIPLLVV<br>GNK | 1,752.03 |
| ATP | 6018 | RecName<br>:<br>Full=Gua<br>nine<br>nucleotid<br>e-binding<br>protein<br>subunit<br>alpha-11;<br>Short=G-<br>protein<br>subunit<br>alpha-11;<br>Short=G<br>alpha-11;<br>AltName:<br>Full=G-<br>protein<br>subunit<br>GL2<br>alpha | gi 1169852,<br>gi 1337774<br>82,gi 21756<br>8,gi 278057<br>95 | 41,360.90 | 100.00% | 6 | 6 | 8 | 0.07% | 21.00% | DTILQLN 2.48<br>LK           | 1,057.63 |







|     |      |                                                                                                                                                                                                                                   |                                                                            |         |   |   |   |       |        |                                   |      |          |
|-----|------|-----------------------------------------------------------------------------------------------------------------------------------------------------------------------------------------------------------------------------------|----------------------------------------------------------------------------|---------|---|---|---|-------|--------|-----------------------------------|------|----------|
| ATP | 6018 | RecName<br>:<br>Full=Gua<br>nine<br>nucleotid<br>e-binding<br>protein<br>subunit<br>alpha-11;<br>Short=G-<br>protein<br>subunit<br>alpha-11;<br>Short=G<br>alpha-11;<br>AltName:<br>Full=G-<br>protein<br>subunit<br>GL2<br>alpha | gi 1169852, 41,360.90<br>gi 1337774<br>82,gi 21756<br>8,gi 278057<br>95    | 100.00% | 6 | 6 | 8 | 0.07% | 21.00% | VRVPTT<br>GIIEYPF<br>DLENIIF<br>R | 4.97 | 2,492.36 |
| ATP | 6018 | mitochon<br>drial<br>NADH:u<br>biquinon<br>e<br>oxidored<br>uctase<br>B16.6<br>subunit                                                                                                                                            | gi 1586461 16,655.90<br>6,gi 201390<br>62,gi 28603<br>804,gi 7426<br>8330  | 100.00% | 3 | 4 | 5 | 0.04% | 26.40% | IALMPLL<br>QAEK                   | 2.39 | 1,242.71 |
| ATP | 6018 | mitochon<br>drial<br>NADH:u<br>biquinon<br>e<br>oxidored<br>uctase<br>B16.6<br>subunit                                                                                                                                            | gi 1586461 16,655.90<br>6,gi 201390<br>62,gi 28603<br>804,gi 7426<br>8330  | 100.00% | 3 | 4 | 5 | 0.04% | 26.40% | LQIEDFE<br>AR                     | 2.81 | 1,120.56 |
| ATP | 6018 | mitochon<br>drial<br>NADH:u<br>biquinon<br>e<br>oxidored<br>uctase<br>B16.6<br>subunit                                                                                                                                            | gi 1586461 16,655.90<br>6,gi 201390<br>62,gi 28603<br>804,gi 7426<br>8330  | 100.00% | 3 | 4 | 5 | 0.04% | 26.40% | VKQDMP<br>PVGGYG<br>PIDYKR        | 4.75 | 2,036.03 |
| ATP | 6018 | Tyrosine<br>3-<br>monooxy<br>genase/tr<br>yptophan<br>5-<br>monooxy<br>genase<br>activation<br>protein,<br>beta<br>polypepti<br>de                                                                                                | gi 1113070 28,065.10<br>57,gi 11543<br>2055,gi 285<br>2383,gi 711<br>53774 | 99.80%  | 2 | 3 | 3 | 0.03% | 19.90% | QTTVSN<br>SQQAYQ<br>EAFEISK<br>K  | 3.21 | 2,287.12 |

|     |      |                                                                                                                                    |                                                                                     |           |         |    |    |    |       |        |                                                    |          |
|-----|------|------------------------------------------------------------------------------------------------------------------------------------|-------------------------------------------------------------------------------------|-----------|---------|----|----|----|-------|--------|----------------------------------------------------|----------|
| ATP | 6018 | Tyrosine<br>3-<br>monooxy<br>genase/tr<br>yptophan<br>5-<br>monooxy<br>genase<br>activation<br>protein,<br>beta<br>polypepti<br>de | gi 1113070<br>57,gi 11543<br>2055,gi 285<br>2383,gi 711<br>53774                    | 28,065.10 | 99.80%  | 2  | 3  | 3  | 0.03% | 19.90% | TAFDEAI 5.49<br>AELDTL<br>NEESYK<br>DSTLIM<br>QLLR | 3,345.64 |
| ATP | 6018 | basigin                                                                                                                            | gi 1154961<br>27,gi 12041<br>9551,gi 154<br>425710,gi 1<br>56713141,g<br>i 73587049 | 29,754.80 | 100.00% | 5  | 6  | 8  | 0.07% | 21.80% | FFVVSSE 3.14<br>SR                                 | 1,057.53 |
| ATP | 6018 | basigin                                                                                                                            | gi 1154961<br>27,gi 12041<br>9551,gi 154<br>425710,gi 1<br>56713141,g<br>i 73587049 | 29,754.80 | 100.00% | 5  | 6  | 8  | 0.07% | 21.80% | RKPDEV 5.15<br>LDDEDI<br>GSAPLK                    | 1,997.02 |
| ATP | 6018 | basigin                                                                                                                            | gi 1154961<br>27,gi 12041<br>9551,gi 154<br>425710,gi 1<br>56713141,g<br>i 73587049 | 29,754.80 | 100.00% | 5  | 6  | 8  | 0.07% | 21.80% | TELHIPN 2.81<br>VDLK                               | 1,278.71 |
| ATP | 6018 | basigin                                                                                                                            | gi 1154961<br>27,gi 12041<br>9551,gi 154<br>425710,gi 1<br>56713141,g<br>i 73587049 | 29,754.80 | 100.00% | 5  | 6  | 8  | 0.07% | 21.80% | VLKEDA 2.9<br>LPDLK                                | 1,240.72 |
| ATP | 6018 | basigin                                                                                                                            | gi 1154961<br>27,gi 12041<br>9551,gi 154<br>425710,gi 1<br>56713141,g<br>i 73587049 | 29,754.80 | 100.00% | 5  | 6  | 8  | 0.07% | 21.80% | VLKEDA 5.68<br>LPDLKT<br>EYEVDS<br>EDR             | 2,464.21 |
| ATP | 6018 | Tubulin,<br>beta 2C                                                                                                                | gi 7577358<br>3,gi 777362<br>71                                                     | 49,812.70 | 100.00% | 14 | 15 | 26 | 0.22% | 40.20% | ALTVPE 3.29<br>LTQQMF<br>DAK                       | 1,707.86 |
| ATP | 6018 | Tubulin,<br>beta 2C                                                                                                                | gi 7577358<br>3,gi 777362<br>71                                                     | 49,812.70 | 100.00% | 14 | 15 | 26 | 0.22% | 40.20% | AVLVDL 3.37<br>EPGTMD<br>SVR                       | 1,617.82 |
| ATP | 6018 | Tubulin,<br>beta 2C                                                                                                                | gi 7577358<br>3,gi 777362<br>71                                                     | 49,812.70 | 100.00% | 14 | 15 | 26 | 0.22% | 40.20% | FPGQLN 2.72<br>ADLR                                | 1,130.60 |
| ATP | 6018 | Tubulin,<br>beta 2C                                                                                                                | gi 7577358<br>3,gi 777362<br>71                                                     | 49,812.70 | 100.00% | 14 | 15 | 26 | 0.22% | 40.20% | FPGQLN 2.7<br>ADLRK                                | 1,258.69 |
| ATP | 6018 | Tubulin,<br>beta 2C                                                                                                                | gi 7577358<br>3,gi 777362<br>71                                                     | 49,812.70 | 100.00% | 14 | 15 | 26 | 0.22% | 40.20% | GHYTEG 4.05<br>AELVDS<br>VLDVVR                    | 1,958.98 |
| ATP | 6018 | Tubulin,<br>beta 2C                                                                                                                | gi 7577358<br>3,gi 777362<br>71                                                     | 49,812.70 | 100.00% | 14 | 15 | 26 | 0.22% | 40.20% | GHYTEG 4.32<br>AELVDS<br>VLDVVR<br>K               | 2,087.08 |
| ATP | 6018 | Tubulin,<br>beta 2C                                                                                                                | gi 7577358<br>3,gi 777362<br>71                                                     | 49,812.70 | 100.00% | 14 | 15 | 26 | 0.22% | 40.20% | IMNTFSV 3.92<br>VPSPK                              | 1,335.70 |

|     |      |                                                                                                                                                                             |                                                            |           |         |    |    |    |       |        |                                                                     |          |
|-----|------|-----------------------------------------------------------------------------------------------------------------------------------------------------------------------------|------------------------------------------------------------|-----------|---------|----|----|----|-------|--------|---------------------------------------------------------------------|----------|
| ATP | 6018 | Tubulin, beta 2C                                                                                                                                                            | gi 75773583,gi 77736271                                    | 49,812.70 | 100.00% | 14 | 15 | 26 | 0.22% | 40.20% | IREEYPD 2.87<br>RIMNTFS<br>VVPSPK                                   | 2,394.21 |
| ATP | 6018 | Tubulin, beta 2C                                                                                                                                                            | gi 75773583,gi 77736271                                    | 49,812.70 | 100.00% | 14 | 15 | 26 | 0.22% | 40.20% | ISEQFTA 2.79<br>MFR                                                 | 1,245.59 |
| ATP | 6018 | Tubulin, beta 2C                                                                                                                                                            | gi 75773583,gi 77736271                                    | 49,812.70 | 100.00% | 14 | 15 | 26 | 0.22% | 40.20% | LAVNMV 4.05<br>PFPR                                                 | 1,159.63 |
| ATP | 6018 | Tubulin, beta 2C                                                                                                                                                            | gi 75773583,gi 77736271                                    | 49,812.70 | 100.00% | 14 | 15 | 26 | 0.22% | 40.20% | LHFFMP 3.36<br>GFAPLTS<br>R                                         | 1,636.83 |
| ATP | 6018 | Tubulin, beta 2C                                                                                                                                                            | gi 75773583,gi 77736271                                    | 49,812.70 | 100.00% | 14 | 15 | 26 | 0.22% | 40.20% | MSATFIG 4.88<br>NSTAIQE<br>LFK                                      | 1,873.94 |
| ATP | 6018 | Tubulin, beta 2C                                                                                                                                                            | gi 75773583,gi 77736271                                    | 49,812.70 | 100.00% | 14 | 15 | 26 | 0.22% | 40.20% | VSDTVV 4.3<br>EPYNAT<br>LSVHQL<br>VENTDE<br>TYCIDNE<br>ALYDICF<br>R | 4,479.06 |
| ATP | 6018 | Tubulin, beta 2C                                                                                                                                                            | gi 75773583,gi 77736271                                    | 49,812.70 | 100.00% | 14 | 15 | 26 | 0.22% | 40.20% | YLTVA 2.97<br>VFR                                                   | 1,039.59 |
| ATP | 6018 | RecName : Full=Peptidyl-prolyl cis-trans isomerase B; Short=PP1ase; Short=Rotamase; AltName: Full=Cyclophilin B; AltName: Full=S-cyclophilin; Short=SCYLP; Flags: Precursor | gi 215274238,gi 27806469,gi 529242,gi 59858297,gi 74268324 | 23,726.00 | 100.00% | 2  | 2  | 4  | 0.03% | 12.50% | TVDNFV 4.06<br>ALATGE<br>K                                          | 1,364.71 |

|     |      |                                                                                                                                                                                                                                                           |                                                                                |           |         |   |   |    |       |        |                                      |          |
|-----|------|-----------------------------------------------------------------------------------------------------------------------------------------------------------------------------------------------------------------------------------------------------------|--------------------------------------------------------------------------------|-----------|---------|---|---|----|-------|--------|--------------------------------------|----------|
| ATP | 6018 | RecName<br>:<br>Full=Pept<br>idyl-<br>prolyl cis-<br>trans<br>isomerase<br>B;<br>Short=PP<br>Iase;<br>Short=Ro<br>tamase;<br>AltName:<br>Full=Cyc<br>lophilin<br>B;<br>AltName:<br>Full=S-<br>cyclophili<br>n;<br>Short=SC<br>YLP;<br>Flags:<br>Precursor | gi 2152742<br>38,gi 27806<br>469,gi 5292<br>42,gi 59858<br>297,gi 7426<br>8324 | 23,726.00 | 100.00% | 2 | 2 | 4  | 0.03% | 12.50% | VIKDFMI 3.51<br>QGGDFT<br>R          | 1,642.83 |
| ATP | 6018 | FLOT2<br>protein                                                                                                                                                                                                                                          | gi 1515536<br>23,gi 16445<br>2939                                              | 46,976.90 | 100.00% | 8 | 9 | 10 | 0.09% | 25.70% | DVYDKV 3.76<br>DYLSSL<br>GK          | 1,601.81 |
| ATP | 6018 | FLOT2<br>protein                                                                                                                                                                                                                                          | gi 1515536<br>23,gi 16445<br>2939                                              | 46,976.90 | 100.00% | 8 | 9 | 10 | 0.09% | 25.70% | LLAELPA 4.16<br>SVHALT<br>GVDLSK     | 1,934.10 |
| ATP | 6018 | FLOT2<br>protein                                                                                                                                                                                                                                          | gi 1515536<br>23,gi 16445<br>2939                                              | 46,976.90 | 100.00% | 8 | 9 | 10 | 0.09% | 25.70% | MALVLD 3.7<br>ALPR                   | 1,114.63 |
| ATP | 6018 | FLOT2<br>protein                                                                                                                                                                                                                                          | gi 1515536<br>23,gi 16445<br>2939                                              | 46,976.90 | 100.00% | 8 | 9 | 10 | 0.09% | 25.70% | NVVLQT 2.11<br>LEGHLR                | 1,378.78 |
| ATP | 6018 | FLOT2<br>protein                                                                                                                                                                                                                                          | gi 1515536<br>23,gi 16445<br>2939                                              | 46,976.90 | 100.00% | 8 | 9 | 10 | 0.09% | 25.70% | QVLLAQ 3.05<br>AEAEEK                | 1,199.66 |
| ATP | 6018 | FLOT2<br>protein                                                                                                                                                                                                                                          | gi 1515536<br>23,gi 16445<br>2939                                              | 46,976.90 | 100.00% | 8 | 9 | 10 | 0.09% | 25.70% | SILGTLT 2.85<br>VEQIQ<br>DRDQFA<br>K | 2,325.21 |
| ATP | 6018 | FLOT2<br>protein                                                                                                                                                                                                                                          | gi 1515536<br>23,gi 16445<br>2939                                              | 46,976.90 | 100.00% | 8 | 9 | 10 | 0.09% | 25.70% | TAEAQL 3.06<br>AYELQG<br>AR          | 1,520.77 |
| ATP | 6018 | FLOT2<br>protein                                                                                                                                                                                                                                          | gi 1515536<br>23,gi 16445<br>2939                                              | 46,976.90 | 100.00% | 8 | 9 | 10 | 0.09% | 25.70% | TDKELIA 2.43<br>TVR                  | 1,145.65 |
| ATP | 6018 | RecName<br>:<br>Full=GPI<br>transamid<br>ase<br>compone<br>nt PIG-S;<br>AltName:<br>Full=Pho<br>sphatidyl<br>nositol-<br>glycan<br>biosynthe<br>sis class<br>S protein                                                                                    | gi 1162485<br>78,gi 74268<br>100,gi 7773<br>5383                               | 61,769.20 | 100.00% | 3 | 4 | 4  | 0.03% | 11.90% | APLPYS 4.2<br>QISGLNS<br>LK          | 1,587.87 |

|     |      |                                                                                                                                                                                               |                       |         |   |   |   |       |        |                                                      |      |          |
|-----|------|-----------------------------------------------------------------------------------------------------------------------------------------------------------------------------------------------|-----------------------|---------|---|---|---|-------|--------|------------------------------------------------------|------|----------|
| ATP | 6018 | RecName gi 1162485 :<br>78,gi 74268<br>Full=GPI 100,gi 7773<br>transamid 5383<br>ase<br>componen<br>nt PIG-S;<br>AltName:<br>Full=Phosphatidylinositol-glycan biosynthesis class<br>S protein | 61,769.20             | 100.00% | 3 | 4 | 4 | 0.03% | 11.90% | LMVPVT<br>VVFTQE<br>SVPLDD<br>QEKLPT<br>VVHER        | 3.82 | 3,468.81 |
| ATP | 6018 | RecName gi 1162485 :<br>78,gi 74268<br>Full=GPI 100,gi 7773<br>transamid 5383<br>ase<br>componen<br>nt PIG-S;<br>AltName:<br>Full=Phosphatidylinositol-glycan biosynthesis class<br>S protein | 61,769.20             | 100.00% | 3 | 4 | 4 | 0.03% | 11.90% | SVENLA<br>TATTTL<br>TSLAQL<br>LGK                    | 4.62 | 2,132.18 |
| ATP | 6018 | PREDICTED:<br>8<br>similar to<br>ADAM metallopeptidase domain<br>17<br>isoform 1                                                                                                              | gi 7663029 92,981.40  | 99.80%  | 2 | 2 | 2 | 0.02% | 5.09%  | GYGIQIE<br>QIR                                       | 3.57 | 1,176.64 |
| ATP | 6018 | PREDICTED:<br>8<br>similar to<br>ADAM metallopeptidase domain<br>17<br>isoform 1                                                                                                              | gi 7663029 92,981.40  | 99.80%  | 2 | 2 | 2 | 0.02% | 5.09%  | MDTIQE<br>DPSTDS<br>HADEDG<br>FEKDPFP<br>NSSAAA<br>K | 2.6  | 3,468.47 |
| ATP | 6018 | PREDICTED:<br>29<br>similar to<br>Solute carrier family 12 member 7<br>(Electron neutral potassium-chloride cotransporter 4) (K-Cl cotransporter 4)                                           | gi 1946764 128,599.80 | 99.80%  | 2 | 2 | 2 | 0.02% | 2.61%  | DLQTFL<br>YHLR                                       | 2.89 | 1,305.70 |

|     |      |                                                                                                                                         |                                                                                   |            |        |   |   |   |       |        |                                               |      |          |
|-----|------|-----------------------------------------------------------------------------------------------------------------------------------------|-----------------------------------------------------------------------------------|------------|--------|---|---|---|-------|--------|-----------------------------------------------|------|----------|
| ATP | 6018 | PREDICTED:<br>similar to Solute carrier family 12 member 7 (Electron neutral potassium-chloride cotransporter 4) (K-Cl cotransporter 4) | gi 194676429                                                                      | 128,599.80 | 99.80% | 2 | 2 | 2 | 0.02% | 2.61%  | LANYTN<br>LSQGVV<br>EHEEAE<br>DSR             | 4.05 | 2,361.10 |
| ATP | 6018 | YWHAAG protein                                                                                                                          | gi 157279400,gi 157744500,gi 2852385,gi 71153781                                  | 28,235.10  | 99.80% | 2 | 2 | 2 | 0.02% | 17.40% | NVTELN<br>EPLSNEER                            | 4    | 1,643.79 |
| ATP | 6018 | YWHAAG protein                                                                                                                          | gi 157279400,gi 157744500,gi 2852385,gi 71153781                                  | 28,235.10  | 99.80% | 2 | 2 | 2 | 0.02% | 17.40% | TAFDDAI<br>AELDTL<br>NEDSYK<br>DSTLIM<br>QLLR | 4.23 | 3,317.61 |
| ATP | 6018 | Chain C, Subcomplex Of The Stator Of Bovine Mitochondrial Atp Synthase                                                                  | gi 110591028,gi 110591031,gi 114687,gi 163036,gi 27807291,gi 55670489,gi 73586602 | 12,514.70  | 99.80% | 2 | 2 | 2 | 0.02% | 43.50% | ADMNTF<br>PNFTFED<br>PKFEVV<br>EKPQS          | 3.01 | 2,833.30 |
| ATP | 6018 | Chain C, Subcomplex Of The Stator Of Bovine Mitochondrial Atp Synthase                                                                  | gi 110591028,gi 110591031,gi 114687,gi 163036,gi 27807291,gi 55670489,gi 73586602 | 12,514.70  | 99.80% | 2 | 2 | 2 | 0.02% | 43.50% | QTSGGP<br>VDAGPE<br>YQQDL<br>RELK             | 3.52 | 2,550.21 |
| ATP | 6018 | heterogeneous nuclear ribonucleoprotein A2/B1                                                                                           | gi 114051756,gi 122145945,gi 87578315                                             | 35,988.50  | 99.80% | 2 | 3 | 3 | 0.03% | 13.20% | GFGFVT<br>FDDHDP<br>VDKIVL<br>QK              | 2.67 | 2,277.16 |
| ATP | 6018 | heterogeneous nuclear ribonucleoprotein A2/B1                                                                                           | gi 114051756,gi 122145945,gi 87578315                                             | 35,988.50  | 99.80% | 2 | 3 | 3 | 0.03% | 13.20% | NMGGPY<br>GGGNYG<br>PGGSGG<br>SGGYGG<br>R     | 4.58 | 2,205.90 |



|     |      |                                                       |                                                                                                                                                                                    |            |         |   |    |    |       |       |                                          |          |
|-----|------|-------------------------------------------------------|------------------------------------------------------------------------------------------------------------------------------------------------------------------------------------|------------|---------|---|----|----|-------|-------|------------------------------------------|----------|
| ATP | 6018 | RecName<br>:<br>Full=Clat<br>hrin<br>heavy<br>chain 1 | gi 1705915,<br>gi 2780668<br>9,gi 565545<br>48,gi 56554<br>549,gi 5655<br>4550,gi 565<br>54551,gi 56<br>554552,gi 5<br>6554553,gi <br>56554554,g<br>i 56554555,<br>gi 5655455<br>6 | 186,919.60 | 100.00% | 7 | 10 | 11 | 0.09% | 7.24% | AFMTAD 2.78<br>LPNELIE<br>LLEK           | 1,963.01 |
| ATP | 6018 | RecName<br>:<br>Full=Clat<br>hrin<br>heavy<br>chain 1 | gi 1705915,<br>gi 2780668<br>9,gi 565545<br>48,gi 56554<br>549,gi 5655<br>4550,gi 565<br>54551,gi 56<br>554552,gi 5<br>6554553,gi <br>56554554,g<br>i 56554555,<br>gi 5655455<br>6 | 186,919.60 | 100.00% | 7 | 10 | 11 | 0.09% | 7.24% | ISGETIF 3.77<br>VTAPHE<br>ATAGIIG<br>VNR | 2,353.25 |
| ATP | 6018 | RecName<br>:<br>Full=Clat<br>hrin<br>heavy<br>chain 1 | gi 1705915,<br>gi 2780668<br>9,gi 565545<br>48,gi 56554<br>549,gi 5655<br>4550,gi 565<br>54551,gi 56<br>554552,gi 5<br>6554553,gi <br>56554554,g<br>i 56554555,<br>gi 5655455<br>6 | 186,919.60 | 100.00% | 7 | 10 | 11 | 0.09% | 7.24% | KFDVNT 5.41<br>SAVQVLI<br>EHIGNL<br>DR   | 2,368.26 |
| ATP | 6018 | RecName<br>:<br>Full=Clat<br>hrin<br>heavy<br>chain 1 | gi 1705915,<br>gi 2780668<br>9,gi 565545<br>48,gi 56554<br>549,gi 5655<br>4550,gi 565<br>54551,gi 56<br>554552,gi 5<br>6554553,gi <br>56554554,g<br>i 56554555,<br>gi 5655455<br>6 | 186,919.60 | 100.00% | 7 | 10 | 11 | 0.09% | 7.24% | NNLAGA 3.42<br>EELFAR                    | 1,304.66 |
| ATP | 6018 | RecName<br>:<br>Full=Clat<br>hrin<br>heavy<br>chain 1 | gi 1705915,<br>gi 2780668<br>9,gi 565545<br>48,gi 56554<br>549,gi 5655<br>4550,gi 565<br>54551,gi 56<br>554552,gi 5<br>6554553,gi <br>56554554,g<br>i 56554555,<br>gi 5655455<br>6 | 186,919.60 | 100.00% | 7 | 10 | 11 | 0.09% | 7.24% | RPISADS 3.44<br>AIMNPA<br>SK             | 1,573.80 |

|     |      |                                                                                                                                                         |                                                                                                                                                                                    |            |         |   |    |    |       |        |                                      |      |          |
|-----|------|---------------------------------------------------------------------------------------------------------------------------------------------------------|------------------------------------------------------------------------------------------------------------------------------------------------------------------------------------|------------|---------|---|----|----|-------|--------|--------------------------------------|------|----------|
| ATP | 6018 | RecName<br>:<br>Full=Clat<br>hrin<br>heavy<br>chain 1                                                                                                   | gi 1705915,<br>gi 2780668<br>9,gi 565545<br>48,gi 56554<br>549,gi 5655<br>4550,gi 565<br>54551,gi 56<br>554552,gi 5<br>6554553,gi <br>56554554,g<br>i 56554555,<br>gi 5655455<br>6 | 186,919.60 | 100.00% | 7 | 10 | 11 | 0.09% | 7.24%  | SVNESL<br>NNLFITE<br>EDYQAL<br>R     | 4.64 | 2,355.15 |
| ATP | 6018 | RecName<br>:<br>Full=Clat<br>hrin<br>heavy<br>chain 1                                                                                                   | gi 1705915,<br>gi 2780668<br>9,gi 565545<br>48,gi 56554<br>549,gi 5655<br>4550,gi 565<br>54551,gi 56<br>554552,gi 5<br>6554553,gi <br>56554554,g<br>i 56554555,<br>gi 5655455<br>6 | 186,919.60 | 100.00% | 7 | 10 | 11 | 0.09% | 7.24%  | TLQIFNI<br>EMK                       | 2.49 | 1,252.66 |
| ATP | 6018 | PREDIC<br>TED:<br>similar to<br>Tyrosine-<br>protein<br>kinase-<br>like 7<br>precursor<br>(Colon<br>carcinom<br>a kinase<br>4) (CCK-<br>4)<br>isoform 2 | gi 1199152<br>91                                                                                                                                                                   | 126,668.70 | 99.80%  | 2 | 2  | 2  | 0.02% | 2.52%  | HPASEA<br>AIQPLTQ<br>VTLR            | 3.51 | 1,832.00 |
| ATP | 6018 | PREDIC<br>TED:<br>similar to<br>Tyrosine-<br>protein<br>kinase-<br>like 7<br>precursor<br>(Colon<br>carcinom<br>a kinase<br>4) (CCK-<br>4)<br>isoform 2 | gi 1199152<br>91                                                                                                                                                                   | 126,668.70 | 99.80%  | 2 | 2  | 2  | 0.02% | 2.52%  | VVLAPQ<br>DVVVAR                     | 2.51 | 1,265.76 |
| ATP | 6018 | coiled-<br>coil<br>domain<br>containin<br>g 47                                                                                                          | gi 1462318<br>52,gi 73586<br>661,gi 7836<br>9308,gi 970<br>45772                                                                                                                   | 55,725.10  | 100.00% | 3 | 3  | 3  | 0.03% | 10.60% | ELLESNF<br>TLVGDD<br>GTNKEA<br>TSTGK | 3.39 | 2,526.22 |
| ATP | 6018 | coiled-<br>coil<br>domain<br>containin<br>g 47                                                                                                          | gi 1462318<br>52,gi 73586<br>661,gi 7836<br>9308,gi 970<br>45772                                                                                                                   | 55,725.10  | 100.00% | 3 | 3  | 3  | 0.03% | 10.60% | RQDLLN<br>VLAR                       | 3.05 | 1,197.71 |

|     |      |                                                                  |                                                     |           |         |   |   |   |       |        |                                        |          |
|-----|------|------------------------------------------------------------------|-----------------------------------------------------|-----------|---------|---|---|---|-------|--------|----------------------------------------|----------|
| ATP | 6018 | coiled-coil domain containin g 47                                | gi 146231852,gi 73586661,gi 78369308,gi 97045772    | 55,725.10 | 100.00% | 3 | 3 | 3 | 0.03% | 10.60% | TLLFTFN 2.26<br>VPGSGN<br>TYPK         | 1,855.96 |
| ATP | 6018 | hydroxysteroid (17-beta) dehydrogenase 11                        | gi 114052807,gi 86438493                            | 35,077.20 | 100.00% | 4 | 5 | 6 | 0.05% | 14.20% | FDAVIG 2.54<br>YK                      | 912.4826 |
| ATP | 6018 | hydroxysteroid (17-beta) dehydrogenase 11                        | gi 114052807,gi 86438493                            | 35,077.20 | 100.00% | 4 | 5 | 6 | 0.05% | 14.20% | KSVTGEI 3.61<br>VLITGA<br>GHGIGR       | 1,865.06 |
| ATP | 6018 | hydroxysteroid (17-beta) dehydrogenase 11                        | gi 114052807,gi 86438493                            | 35,077.20 | 100.00% | 4 | 5 | 6 | 0.05% | 14.20% | NPSTSLG 5.22<br>PTLEPEE<br>VVNK        | 1,910.97 |
| ATP | 6018 | hydroxysteroid (17-beta) dehydrogenase 11                        | gi 114052807,gi 86438493                            | 35,077.20 | 100.00% | 4 | 5 | 6 | 0.05% | 14.20% | SVTGEIV 4.69<br>LITGAG<br>HGIGR        | 1,736.97 |
| ATP | 6018 | pre-B-cell leukemia transcript ion factor interactin g protein 1 | gi 110331795,gi 115497324,gi 151554897,gi 158706093 | 80,239.50 | 99.80%  | 2 | 2 | 2 | 0.02% | 3.85%  | ALESEL 3.15<br>QQLR                    | 1,186.64 |
| ATP | 6018 | pre-B-cell leukemia transcript ion factor interactin g protein 1 | gi 110331795,gi 115497324,gi 151554897,gi 158706093 | 80,239.50 | 99.80%  | 2 | 2 | 2 | 0.02% | 3.85%  | LLQAQL 3.69<br>QAQKEE<br>LQSLMR        | 2,143.15 |
| ATP | 6018 | Ribosomal protein S3                                             | gi 74268226,gi 77404290,gi 91207641                 | 26,670.50 | 100.00% | 4 | 4 | 4 | 0.03% | 24.70% | AELNEFL 2.75<br>TR                     | 1,092.57 |
| ATP | 6018 | Ribosomal protein S3                                             | gi 74268226,gi 77404290,gi 91207641                 | 26,670.50 | 100.00% | 4 | 4 | 4 | 0.03% | 24.70% | DEILPTT 3.46<br>PISEQK                 | 1,470.77 |
| ATP | 6018 | Ribosomal protein S3                                             | gi 74268226,gi 77404290,gi 91207641                 | 26,670.50 | 100.00% | 4 | 4 | 4 | 0.03% | 24.70% | FVDGLM 5.3<br>IHSGDPV<br>NYYVDT<br>AVR | 2,484.19 |
| ATP | 6018 | Ribosomal protein S3                                             | gi 74268226,gi 77404290,gi 91207641                 | 26,670.50 | 100.00% | 4 | 4 | 4 | 0.03% | 24.70% | GGKPEP 2.97<br>PAMPQP<br>VPTA          | 1,589.80 |
| ATP | 6018 | Leucine zipper-EF hand containin g transmembrane protein 1       | gi 111308604,gi 115497920                           | 81,801.70 | 100.00% | 7 | 8 | 8 | 0.07% | 15.60% | ADDKLI 3.59<br>AEEGVD<br>SLNVK         | 1,815.93 |

|     |      |                                                             |                        |           |         |   |   |    |       |        |                            |      |          |
|-----|------|-------------------------------------------------------------|------------------------|-----------|---------|---|---|----|-------|--------|----------------------------|------|----------|
| ATP | 6018 | Leucine zipper-EF hand containin g transmem brane protein 1 | gi 1113086             | 81,801.70 | 100.00% | 7 | 8 | 8  | 0.07% | 15.60% | AMYLPE TLSPAD QLK          | 3.54 | 1,692.85 |
| ATP | 6018 | Leucine zipper-EF hand containin g transmem brane protein 1 | gi 1113086             | 81,801.70 | 100.00% | 7 | 8 | 8  | 0.07% | 15.60% | FLQDTIE EMALK              | 3.46 | 1,453.72 |
| ATP | 6018 | Leucine zipper-EF hand containin g transmem brane protein 1 | gi 1113086             | 81,801.70 | 100.00% | 7 | 8 | 8  | 0.07% | 15.60% | IRETGER PSNEEIM R          | 2.06 | 1,832.89 |
| ATP | 6018 | Leucine zipper-EF hand containin g transmem brane protein 1 | gi 1113086             | 81,801.70 | 100.00% | 7 | 8 | 8  | 0.07% | 15.60% | KLEEGG PVYSPP AQA AVR      | 3.17 | 1,868.99 |
| ATP | 6018 | Leucine zipper-EF hand containin g transmem brane protein 1 | gi 1113086             | 81,801.70 | 100.00% | 7 | 8 | 8  | 0.07% | 15.60% | LLELQSI GTNNFL R           | 4.33 | 1,617.90 |
| ATP | 6018 | Leucine zipper-EF hand containin g transmem brane protein 1 | gi 1113086             | 81,801.70 | 100.00% | 7 | 8 | 8  | 0.07% | 15.60% | LLSLASA LDDNKD GKVDID DLVK | 1.97 | 2,457.31 |
| ATP | 6018 | voltage-dependen t anion channel 1                          | gi 8810220, gi 9011186 | 30,723.80 | 100.00% | 8 | 9 | 47 | 0.40% | 37.80% | LTFDSSF SPNTGK             | 3.91 | 1,400.67 |
| ATP | 6018 | voltage-dependen t anion channel 1                          | gi 8810220, gi 9011186 | 30,723.80 | 100.00% | 8 | 9 | 47 | 0.40% | 37.80% | LTFDSSF SPNTGK K           | 3.67 | 1,528.76 |
| ATP | 6018 | voltage-dependen t anion channel 1                          | gi 8810220, gi 9011186 | 30,723.80 | 100.00% | 8 | 9 | 47 | 0.40% | 37.80% | LTLSALL DGK                | 3.89 | 1,030.61 |
| ATP | 6018 | voltage-dependen t anion channel 1                          | gi 8810220, gi 9011186 | 30,723.80 | 100.00% | 8 | 9 | 47 | 0.40% | 37.80% | LTLSALL DGKNVN AGGHK       | 3.17 | 1,808.00 |
| ATP | 6018 | voltage-dependen t anion channel 1                          | gi 8810220, gi 9011186 | 30,723.80 | 100.00% | 8 | 9 | 47 | 0.40% | 37.80% | TDEFQL HTNVND GTEFGG SIYQK | 5.53 | 2,600.19 |

|     |      |                                   |                                                                                                    |           |         |   |   |    |       |        |                                     |      |          |
|-----|------|-----------------------------------|----------------------------------------------------------------------------------------------------|-----------|---------|---|---|----|-------|--------|-------------------------------------|------|----------|
| ATP | 6018 | voltage-dependent anion channel 1 | gi 8810220, gi 9011186                                                                             | 30,723.80 | 100.00% | 8 | 9 | 47 | 0.40% | 37.80% | TKSENG<br>LEFTSSG<br>SANTET<br>TK   | 4.67 | 2,189.02 |
| ATP | 6018 | voltage-dependent anion channel 1 | gi 8810220, gi 9011186                                                                             | 30,723.80 | 100.00% | 8 | 9 | 47 | 0.40% | 37.80% | VNSSSLI<br>GLGYTQ<br>TLKPGIK        | 5.28 | 2,103.18 |
| ATP | 6018 | voltage-dependent anion channel 1 | gi 8810220, gi 9011186                                                                             | 30,723.80 | 100.00% | 8 | 9 | 47 | 0.40% | 37.80% | VTQSNF<br>AVGYK                     | 3.83 | 1,213.62 |
| ATP | 6018 | voltage-dependent anion channel 2 | gi 5985840, gi 621771, gi 48, gi 73586, gi 695, gi 8574, gi 295, gi 8810, gi 222, gi 9011, gi 1864 | 31,602.50 | 100.00% | 7 | 8 | 24 | 0.21% | 29.60% | GFGFGL<br>VK                        | 1.99 | 824.4666 |
| ATP | 6018 | voltage-dependent anion channel 2 | gi 5985840, gi 621771, gi 48, gi 73586, gi 695, gi 8574, gi 295, gi 8810, gi 222, gi 9011, gi 1864 | 31,602.50 | 100.00% | 7 | 8 | 24 | 0.21% | 29.60% | LTFDITF<br>SPNTGK                   | 3.83 | 1,428.70 |
| ATP | 6018 | voltage-dependent anion channel 2 | gi 5985840, gi 621771, gi 48, gi 73586, gi 695, gi 8574, gi 295, gi 8810, gi 222, gi 9011, gi 1864 | 31,602.50 | 100.00% | 7 | 8 | 24 | 0.21% | 29.60% | LTFDITF<br>SPNTGK<br>K              | 3.74 | 1,556.80 |
| ATP | 6018 | voltage-dependent anion channel 2 | gi 5985840, gi 621771, gi 48, gi 73586, gi 695, gi 8574, gi 295, gi 8810, gi 222, gi 9011, gi 1864 | 31,602.50 | 100.00% | 7 | 8 | 24 | 0.21% | 29.60% | LTLSAL<br>VDGK                      | 3.39 | 1,016.60 |
| ATP | 6018 | voltage-dependent anion channel 2 | gi 5985840, gi 621771, gi 48, gi 73586, gi 695, gi 8574, gi 295, gi 8810, gi 222, gi 9011, gi 1864 | 31,602.50 | 100.00% | 7 | 8 | 24 | 0.21% | 29.60% | TGDFQL<br>HTNVND<br>GTEFGG<br>SIYQK | 5.61 | 2,528.17 |
| ATP | 6018 | voltage-dependent anion channel 2 | gi 5985840, gi 621771, gi 48, gi 73586, gi 695, gi 8574, gi 295, gi 8810, gi 222, gi 9011, gi 1864 | 31,602.50 | 100.00% | 7 | 8 | 24 | 0.21% | 29.60% | VNSSSLI<br>GVGYTQ<br>TLRPGV<br>K    | 4.68 | 2,103.16 |
| ATP | 6018 | voltage-dependent anion channel 2 | gi 5985840, gi 621771, gi 48, gi 73586, gi 695, gi 8574, gi 295, gi 8810, gi 222, gi 9011, gi 1864 | 31,602.50 | 100.00% | 7 | 8 | 24 | 0.21% | 29.60% | YQLDPT<br>ASISAK                    | 3.13 | 1,293.67 |
| ATP | 6018 | Trx-like protein                  | gi 1097266, gi 96, gi 11549, gi 4922, gi 122, gi 145628, gi 126920889, gi 14623180, gi 8           | 31,563.90 | 99.90%  | 2 | 2 | 2  | 0.02% | 8.27%  | LLPESSQ<br>PLKK                     | 2.09 | 1,239.73 |

|     |      |                                                        |                                                                  |            |         |   |   |   |       |        |                                            |      |          |
|-----|------|--------------------------------------------------------|------------------------------------------------------------------|------------|---------|---|---|---|-------|--------|--------------------------------------------|------|----------|
| ATP | 6018 | Trx-like protein                                       | gi 109726696,gi 115494922,gi 122145628,gi 126920889,gi 146231808 | 31,563.90  | 99.90%  | 2 | 2 | 2 | 0.02% | 8.27%  | VDVTEQ<br>PGLSGR                           | 4.1  | 1,257.64 |
| ATP | 6018 | endothelial cell-specific molecule 2                   | gi 114053335,gi 86438024                                         | 20,621.00  | 99.80%  | 2 | 3 | 6 | 0.05% | 13.20% | ESEDPQ<br>KPGSSG<br>LSESGT<br>ANGEK        | 4.15 | 2,378.06 |
| ATP | 6018 | endothelial cell-specific molecule 2                   | gi 114053335,gi 86438024                                         | 20,621.00  | 99.80%  | 2 | 3 | 6 | 0.05% | 13.20% | NKESED<br>PQKPGS<br>SGLSESG<br>STANGE<br>K | 3.52 | 2,620.20 |
| ATP | 6018 | PREDICTED: similar to leucyl/cystinyl aminopeptidase   | gi 119895933                                                     | 119,380.70 | 100.00% | 5 | 6 | 8 | 0.07% | 7.45%  | ANLINNI<br>FELAGL<br>GK                    | 4.63 | 1,586.89 |
| ATP | 6018 | PREDICTED: similar to leucyl/cystinyl aminopeptidase   | gi 119895933                                                     | 119,380.70 | 100.00% | 5 | 6 | 8 | 0.07% | 7.45%  | GLGEHE<br>LDEDEE<br>DYESSA<br>K            | 4.99 | 2,151.88 |
| ATP | 6018 | PREDICTED: similar to leucyl/cystinyl aminopeptidase   | gi 119895933                                                     | 119,380.70 | 100.00% | 5 | 6 | 8 | 0.07% | 7.45%  | IFGELSS<br>YEDFLD<br>AR                    | 3.23 | 1,761.83 |
| ATP | 6018 | PREDICTED: similar to leucyl/cystinyl aminopeptidase   | gi 119895933                                                     | 119,380.70 | 100.00% | 5 | 6 | 8 | 0.07% | 7.45%  | IKRDEQ<br>YTALSN<br>MPK                    | 4.19 | 1,809.92 |
| ATP | 6018 | PREDICTED: similar to leucyl/cystinyl aminopeptidase   | gi 119895933                                                     | 119,380.70 | 100.00% | 5 | 6 | 8 | 0.07% | 7.45%  | KYFAAT<br>QFEPLA<br>AR                     | 3.46 | 1,612.85 |
| ATP | 6018 | PREDICTED: similar to Zinc finger protein basophilic-1 | gi 76647059                                                      | 111,795.20 | 99.80%  | 2 | 2 | 2 | 0.02% | 2.48%  | IEKETME<br>TADEKR                          | 3.59 | 1,595.76 |
| ATP | 6018 | PREDICTED: similar to Zinc finger protein basophilic-1 | gi 76647059                                                      | 111,795.20 | 99.80%  | 2 | 2 | 2 | 0.02% | 2.48%  | VEPCVP<br>FPDYIK                           | 2.29 | 1,406.70 |

|     |      |                                                                                   |                                                                                           |           |         |   |   |   |       |        |                                                                   |      |          |
|-----|------|-----------------------------------------------------------------------------------|-------------------------------------------------------------------------------------------|-----------|---------|---|---|---|-------|--------|-------------------------------------------------------------------|------|----------|
| ATP | 6018 | CYB5B protein                                                                     | gi 158455068,gi 76640228                                                                  | 26,782.70 | 99.80%  | 2 | 2 | 3 | 0.03% | 22.40% | FLDEHP<br>GGEEVL<br>MEQAGG<br>DATESFE<br>DVGHSS<br>DAR            | 4.18 | 3,634.55 |
| ATP | 6018 | CYB5B protein                                                                     | gi 158455068,gi 76640228                                                                  | 26,782.70 | 99.80%  | 2 | 2 | 3 | 0.03% | 22.40% | QYYIGD<br>VHPNDL<br>KPGGGS<br>K                                   | 2.66 | 2,045.01 |
| ATP | 6018 | Chain B, Crystal Structure Of Bovine Heart Mitochondrial Bcl With Jg144 Inhibitor | gi 114793902,gi 27807143,gi 300,gi 401248,gi 59858351,gi 73586962,gi 82407277,gi 82407288 | 46,506.00 | 100.00% | 3 | 3 | 4 | 0.03% | 16.20% | EQNGDS<br>LVHAAL<br>VAESAAI<br>GSAEAN<br>AFSVLQ<br>HVLGAG<br>PHVK | 3.46 | 4,065.08 |
| ATP | 6018 | Chain B, Crystal Structure Of Bovine Heart Mitochondrial Bcl With Jg144 Inhibitor | gi 114793902,gi 27807143,gi 300,gi 401248,gi 59858351,gi 73586962,gi 82407277,gi 82407288 | 46,506.00 | 100.00% | 3 | 3 | 4 | 0.03% | 16.20% | MALIGL<br>GVSHPV<br>LK                                            | 3.36 | 1,450.85 |
| ATP | 6018 | Chain B, Crystal Structure Of Bovine Heart Mitochondrial Bcl With Jg144 Inhibitor | gi 114793902,gi 27807143,gi 300,gi 401248,gi 59858351,gi 73586962,gi 82407277,gi 82407288 | 46,506.00 | 100.00% | 3 | 3 | 4 | 0.03% | 16.20% | TIAQGN<br>LSNPDV<br>QAAK                                          | 5.61 | 1,626.84 |
| ATP | 6018 | NADH dehydrogenase (ubiquinone) Fe-S protein 1, 75kDa (NADH-coenzyme Q reductase) | gi 111308529,gi 128825,gi 163414,gi 27807355                                              | 79,425.10 | 100.00% | 3 | 3 | 3 | 0.03% | 6.19%  | ILQDIAS<br>GSHPF5<br>QVLQEA<br>K                                  | 3.01 | 2,168.13 |

|     |      |                                                                                   |                                                    |           |         |    |    |    |       |        |                                       |          |
|-----|------|-----------------------------------------------------------------------------------|----------------------------------------------------|-----------|---------|----|----|----|-------|--------|---------------------------------------|----------|
| ATP | 6018 | NADH dehydrogenase (ubiquinone) Fe-S protein 1, 75kDa (NADH-coenzyme Q reductase) | gi 111308529,gi 128825,gi 163414,gi 27807355       | 79,425.10 | 100.00% | 3  | 3  | 3  | 0.03% | 6.19%  | NRLEEV 2.8<br>SPNLVLR                 | 1,425.78 |
| ATP | 6018 | NADH dehydrogenase (ubiquinone) Fe-S protein 1, 75kDa (NADH-coenzyme Q reductase) | gi 111308529,gi 128825,gi 163414,gi 27807355       | 79,425.10 | 100.00% | 3  | 3  | 3  | 0.03% | 6.19%  | VALIGSP 3.59<br>VDLTYR                | 1,403.79 |
| ATP | 6018 | Flotillin 1                                                                       | gi 115305033,gi 116004001,gi 118572320,gi 75775078 | 47,334.80 | 100.00% | 12 | 16 | 21 | 0.18% | 41.00% | AQQVAV 4.4<br>QEQEIAR                 | 1,469.77 |
| ATP | 6018 | Flotillin 1                                                                       | gi 115305033,gi 116004001,gi 118572320,gi 75775078 | 47,334.80 | 100.00% | 12 | 16 | 21 | 0.18% | 41.00% | DIHDDQ 3.42<br>DYLHSL<br>GK           | 1,655.77 |
| ATP | 6018 | Flotillin 1                                                                       | gi 115305033,gi 116004001,gi 118572320,gi 75775078 | 47,334.80 | 100.00% | 12 | 16 | 21 | 0.18% | 41.00% | ISLNTLT 3.43<br>LNVK                  | 1,215.73 |
| ATP | 6018 | Flotillin 1                                                                       | gi 115305033,gi 116004001,gi 118572320,gi 75775078 | 47,334.80 | 100.00% | 12 | 16 | 21 | 0.18% | 41.00% | ITLVSSG 4.59<br>SGAMGA<br>AK          | 1,365.70 |
| ATP | 6018 | Flotillin 1                                                                       | gi 115305033,gi 116004001,gi 118572320,gi 75775078 | 47,334.80 | 100.00% | 12 | 16 | 21 | 0.18% | 41.00% | KAEAFQ 4.08<br>LYQEAA<br>QLDMLL<br>EK | 2,355.19 |
| ATP | 6018 | Flotillin 1                                                                       | gi 115305033,gi 116004001,gi 118572320,gi 75775078 | 47,334.80 | 100.00% | 12 | 16 | 21 | 0.18% | 41.00% | LPQVAE 5.48<br>EISGPLT<br>SANK        | 1,753.93 |
| ATP | 6018 | Flotillin 1                                                                       | gi 115305033,gi 116004001,gi 118572320,gi 75775078 | 47,334.80 | 100.00% | 12 | 16 | 21 | 0.18% | 41.00% | LTGVSIS 2.6<br>QVNHKP<br>LR           | 1,648.95 |



|     |      |                                             |                                                                           |           |         |    |    |    |       |        |                                 |          |
|-----|------|---------------------------------------------|---------------------------------------------------------------------------|-----------|---------|----|----|----|-------|--------|---------------------------------|----------|
| ATP | 6018 | Flotillin 1                                 | gi 115305033,gi 116004001,gi 118572320,gi 75775078                        | 47,334.80 | 100.00% | 12 | 16 | 21 | 0.18% | 41.00% | MRGEAE 2.62<br>AFAIGAR          | 1,394.68 |
| ATP | 6018 | Flotillin 1                                 | gi 115305033,gi 116004001,gi 118572320,gi 75775078                        | 47,334.80 | 100.00% | 12 | 16 | 21 | 0.18% | 41.00% | SQLIMQ 5.1<br>AEAEAE<br>AVR     | 1,661.82 |
| ATP | 6018 | Flotillin 1                                 | gi 115305033,gi 116004001,gi 118572320,gi 75775078                        | 47,334.80 | 100.00% | 12 | 16 | 21 | 0.18% | 41.00% | TEAEIAH 5.06<br>IALETLE<br>GHQR | 2,018.03 |
| ATP | 6018 | Flotillin 1                                 | gi 115305033,gi 116004001,gi 118572320,gi 75775078                        | 47,334.80 | 100.00% | 12 | 16 | 21 | 0.18% | 41.00% | VSAQYL 3.14<br>SEIEMA<br>K      | 1,484.73 |
| ATP | 6018 | Flotillin 1                                 | gi 115305033,gi 116004001,gi 118572320,gi 75775078                        | 47,334.80 | 100.00% | 12 | 16 | 21 | 0.18% | 41.00% | VTGEVL 3.24<br>DILSR            | 1,201.68 |
| ATP | 6018 | PREDICTED: similar to ribosomal protein S24 | gi 119914811,gi 194677142,gi 58760477,gi 70778760,gi 74268388,gi 91207637 | 15,283.40 | 100.00% | 3  | 3  | 4  | 0.03% | 29.50% | KQMVID 3.68<br>VLHPGK           | 1,380.77 |
| ATP | 6018 | PREDICTED: similar to ribosomal protein S24 | gi 119914811,gi 194677142,gi 58760477,gi 70778760,gi 74268388,gi 91207637 | 15,283.40 | 100.00% | 3  | 3  | 4  | 0.03% | 29.50% | TTGFGM 2.93<br>IYDSLIDY<br>AK   | 1,697.77 |
| ATP | 6018 | PREDICTED: similar to ribosomal protein S24 | gi 119914811,gi 194677142,gi 58760477,gi 70778760,gi 74268388,gi 91207637 | 15,283.40 | 100.00% | 3  | 3  | 4  | 0.03% | 29.50% | TPDVIF 2.54<br>VFGFR            | 1,398.74 |
| ATP | 6018 | glutathione peroxidase 8                    | gi 114052907,gi 122143886,gi 84708688                                     | 23,965.80 | 99.80%  | 2  | 3  | 3  | 0.03% | 11.00% | ILGSEAE 3.49<br>PAFR            | 1,189.62 |
| ATP | 6018 | glutathione peroxidase 8                    | gi 114052907,gi 122143886,gi 84708688                                     | 23,965.80 | 99.80%  | 2  | 3  | 3  | 0.03% | 11.00% | NNFGVT 3.56<br>FPIPHK           | 1,420.74 |

|     |      |                                                                                                 |                                        |            |         |   |   |   |       |        |                                 |      |          |
|-----|------|-------------------------------------------------------------------------------------------------|----------------------------------------|------------|---------|---|---|---|-------|--------|---------------------------------|------|----------|
| ATP | 6018 | PREDICTED: similar to Neuroblast differentiation-associated protein AHNAK (Desmoyokin), partial | gi 194687805                           | 140,614.00 | 100.00% | 4 | 4 | 4 | 0.03% | 5.01%  | FSMPGF<br>KGEKPE<br>VDVNLP<br>K | 3.05 | 2,064.01 |
| ATP | 6018 | PREDICTED: similar to Neuroblast differentiation-associated protein AHNAK (Desmoyokin), partial | gi 194687805                           | 140,614.00 | 100.00% | 4 | 4 | 4 | 0.03% | 5.01%  | ISMPDV<br>DLNLKG<br>PK          | 2.87 | 1,542.82 |
| ATP | 6018 | PREDICTED: similar to Neuroblast differentiation-associated protein AHNAK (Desmoyokin), partial | gi 194687805                           | 140,614.00 | 100.00% | 4 | 4 | 4 | 0.03% | 5.01%  | VDIEAPD<br>VSLEGPE<br>GK        | 2.89 | 1,654.82 |
| ATP | 6018 | PREDICTED: similar to Neuroblast differentiation-associated protein AHNAK (Desmoyokin), partial | gi 194687805                           | 140,614.00 | 100.00% | 4 | 4 | 4 | 0.03% | 5.01%  | VDVEAP<br>DVSLEG<br>PEGK        | 3.19 | 1,640.80 |
| ATP | 6018 | Tumor protein p53 inducible protein 11                                                          | gi 111304979,gi 115496424              | 20,907.40  | 99.80%  | 2 | 2 | 2 | 0.02% | 13.80% | ISQVLGN<br>EIK                  | 2.99 | 1,100.63 |
| ATP | 6018 | Tumor protein p53 inducible protein 11                                                          | gi 111304979,gi 115496424              | 20,907.40  | 99.80%  | 2 | 2 | 2 | 0.02% | 13.80% | KILGVG<br>GEDDDG<br>EVHR        | 4.53 | 1,695.83 |
| ATP | 6018 | ANXA6 protein                                                                                   | gi 154426044,gi 157151716,gi 160332337 | 75,893.80  | 99.80%  | 2 | 2 | 2 | 0.02% | 4.75%  | GLGTDE<br>DTIIDIA<br>HR         | 2.05 | 1,738.90 |

|     |      |                                                               |                                                     |           |         |   |    |    |       |        |                                                                  |      |          |
|-----|------|---------------------------------------------------------------|-----------------------------------------------------|-----------|---------|---|----|----|-------|--------|------------------------------------------------------------------|------|----------|
| ATP | 6018 | ANXA6 protein                                                 | gi 154426044,gi 157151716,gi 160332337              | 75,893.80 | 99.80%  | 2 | 2  | 2  | 0.02% | 4.75%  | GTVRPA<br>GDFNPD<br>ADAK                                         | 3.03 | 1,630.78 |
| ATP | 6018 | dolichyl-diphosphooligosaccharide-protein glycosyltransferase | gi 110665590,gi 151555878,gi 155371877,gi 215275740 | 48,774.90 | 100.00% | 9 | 10 | 22 | 0.19% | 35.30% | GFVLTF<br>K                                                      | 2.08 | 811.4713 |
| ATP | 6018 | dolichyl-diphosphooligosaccharide-protein glycosyltransferase | gi 110665590,gi 151555878,gi 155371877,gi 215275740 | 48,774.90 | 100.00% | 9 | 10 | 22 | 0.19% | 35.30% | GVGMV<br>ADPDNP<br>LVLILT<br>GSSTSYS<br>FFPDKPI<br>TQYPHA<br>VGK | 5.36 | 4,350.16 |
| ATP | 6018 | dolichyl-diphosphooligosaccharide-protein glycosyltransferase | gi 110665590,gi 151555878,gi 155371877,gi 215275740 | 48,774.90 | 100.00% | 9 | 10 | 22 | 0.19% | 35.30% | LPDVYG<br>VFQFK                                                  | 3.79 | 1,312.69 |
| ATP | 6018 | dolichyl-diphosphooligosaccharide-protein glycosyltransferase | gi 110665590,gi 151555878,gi 155371877,gi 215275740 | 48,774.90 | 100.00% | 9 | 10 | 22 | 0.19% | 35.30% | SSLNPIL<br>FR                                                    | 2.58 | 1,046.60 |
| ATP | 6018 | dolichyl-diphosphooligosaccharide-protein glycosyltransferase | gi 110665590,gi 151555878,gi 155371877,gi 215275740 | 48,774.90 | 100.00% | 9 | 10 | 22 | 0.19% | 35.30% | TADDPS<br>LSLIK                                                  | 2.82 | 1,159.62 |
| ATP | 6018 | dolichyl-diphosphooligosaccharide-protein glycosyltransferase | gi 110665590,gi 151555878,gi 155371877,gi 215275740 | 48,774.90 | 100.00% | 9 | 10 | 22 | 0.19% | 35.30% | TAVIDH<br>HNYDVS<br>DLGQHT<br>LIVADTE<br>NLLK                    | 6.9  | 3,231.63 |
| ATP | 6018 | dolichyl-diphosphooligosaccharide-protein glycosyltransferase | gi 110665590,gi 151555878,gi 155371877,gi 215275740 | 48,774.90 | 100.00% | 9 | 10 | 22 | 0.19% | 35.30% | TLVLLD<br>NLNLR                                                  | 4.29 | 1,283.77 |
| ATP | 6018 | dolichyl-diphosphooligosaccharide-protein glycosyltransferase | gi 110665590,gi 151555878,gi 155371877,gi 215275740 | 48,774.90 | 100.00% | 9 | 10 | 22 | 0.19% | 35.30% | VIFSGSL<br>DFFSDAF<br>FNSAVQ<br>K                                | 2.94 | 2,326.14 |
| ATP | 6018 | dolichyl-diphosphooligosaccharide-protein glycosyltransferase | gi 110665590,gi 151555878,gi 155371877,gi 215275740 | 48,774.90 | 100.00% | 9 | 10 | 22 | 0.19% | 35.30% | YSQTGN<br>YELAVA<br>LSR                                          | 3.36 | 1,671.83 |
| ATP | 6018 | reticulon 4 isoform 2                                         | gi 164259354,gi 92096636                            | 40,940.20 | 100.00% | 3 | 4  | 6  | 0.05% | 10.30% | GPLPAA<br>PLAAPE<br>R                                            | 2.65 | 1,259.71 |

|     |      |                                                                                                    |                                            |           |         |   |    |    |       |        |                                                   |          |
|-----|------|----------------------------------------------------------------------------------------------------|--------------------------------------------|-----------|---------|---|----|----|-------|--------|---------------------------------------------------|----------|
| ATP | 6018 | reticulon<br>4 isoform<br>2                                                                        | gi 1642593<br>54,gi 92096<br>636           | 40,940.20 | 100.00% | 3 | 4  | 6  | 0.05% | 10.30% | HQAQID 4.4<br>HYLGLA<br>NK                        | 1,607.83 |
| ATP | 6018 | reticulon<br>4 isoform<br>2                                                                        | gi 1642593<br>54,gi 92096<br>636           | 40,940.20 | 100.00% | 3 | 4  | 6  | 0.05% | 10.30% | LFLVDD 3.6<br>LVDSLK                              | 1,376.77 |
| ATP | 6018 | ATL3<br>protein                                                                                    | gi 1487454<br>56,gi 15470<br>7918          | 60,294.70 | 100.00% | 8 | 10 | 16 | 0.14% | 21.80% | ALASILL 3.51<br>QDHIR                             | 1,349.79 |
| ATP | 6018 | ATL3<br>protein                                                                                    | gi 1487454<br>56,gi 15470<br>7918          | 60,294.70 | 100.00% | 8 | 10 | 16 | 0.14% | 21.80% | DQHSFE 2.81<br>LEEK                               | 1,261.57 |
| ATP | 6018 | ATL3<br>protein                                                                                    | gi 1487454<br>56,gi 15470<br>7918          | 60,294.70 | 100.00% | 8 | 10 | 16 | 0.14% | 21.80% | EQLQTLI 3.05<br>LHVLNP<br>ANLMEK                  | 2,220.21 |
| ATP | 6018 | ATL3<br>protein                                                                                    | gi 1487454<br>56,gi 15470<br>7918          | 60,294.70 | 100.00% | 8 | 10 | 16 | 0.14% | 21.80% | IYQGED 3.5<br>LPHPK                               | 1,296.66 |
| ATP | 6018 | ATL3<br>protein                                                                                    | gi 1487454<br>56,gi 15470<br>7918          | 60,294.70 | 100.00% | 8 | 10 | 16 | 0.14% | 21.80% | LAMDEIF 4.36<br>QKPFQT<br>LMFLVR                  | 2,343.22 |
| ATP | 6018 | ATL3<br>protein                                                                                    | gi 1487454<br>56,gi 15470<br>7918          | 60,294.70 | 100.00% | 8 | 10 | 16 | 0.14% | 21.80% | LKDIASE 4.91<br>FKEQLQ<br>TLILHVL<br>NPANLM<br>EK | 3,251.77 |
| ATP | 6018 | ATL3<br>protein                                                                                    | gi 1487454<br>56,gi 15470<br>7918          | 60,294.70 | 100.00% | 8 | 10 | 16 | 0.14% | 21.80% | SMLQAT 5.71<br>AEANNL<br>AAAASA<br>K              | 1,848.91 |
| ATP | 6018 | ATL3<br>protein                                                                                    | gi 1487454<br>56,gi 15470<br>7918          | 60,294.70 | 100.00% | 8 | 10 | 16 | 0.14% | 21.80% | VAVVLM 4.51<br>DTQGAF<br>DSQSTV<br>K              | 2,012.00 |
| ATP | 6018 | RecName<br>:<br>Full=Glut<br>athione S-<br>transferas<br>e P;<br>AltName:<br>Full=GS<br>T class-pi | gi 121744,g<br>i 29135329,<br>gi 404,gi 74 | 23,595.90 | 100.00% | 3 | 4  | 4  | 0.03% | 24.30% | ALPQHL 2.55<br>KPFETLL<br>SQNK                    | 1,964.10 |
| ATP | 6018 | RecName<br>:<br>Full=Glut<br>athione S-<br>transferas<br>e P;<br>AltName:<br>Full=GS<br>T class-pi | gi 121744,g<br>i 29135329,<br>gi 404,gi 74 | 23,595.90 | 100.00% | 3 | 4  | 4  | 0.03% | 24.30% | FQDGD L 3.17<br>TLYQSN<br>AILR                    | 1,853.94 |
| ATP | 6018 | RecName<br>:<br>Full=Glut<br>athione S-<br>transferas<br>e P;<br>AltName:<br>Full=GS<br>T class-pi | gi 121744,g<br>i 29135329,<br>gi 404,gi 74 | 23,595.90 | 100.00% | 3 | 4  | 4  | 0.03% | 24.30% | YVSLIYT 3.97<br>NYEAGK<br>EDYVK                   | 2,155.06 |

|     |      |                                                                                                     |                                       |           |         |    |    |    |       |        |                   |      |          |
|-----|------|-----------------------------------------------------------------------------------------------------|---------------------------------------|-----------|---------|----|----|----|-------|--------|-------------------|------|----------|
| ATP | 6018 | Poliovirus receptor-49 related 2 (herpesvirus entry mediator B)                                     | gi 10965837936                        | 43,243.10 | 100.00% | 3  | 3  | 3  | 0.03% | 9.68%  | ETQGSGLPLGTVTVTSR | 3.5  | 1,686.87 |
| ATP | 6018 | Poliovirus receptor-49 related 2 (herpesvirus entry mediator B)                                     | gi 10965837936                        | 43,243.10 | 100.00% | 3  | 3  | 3  | 0.03% | 9.68%  | LLPVILSVR         | 1.88 | 1,009.68 |
| ATP | 6018 | Poliovirus receptor-49 related 2 (herpesvirus entry mediator B)                                     | gi 10965837936                        | 43,243.10 | 100.00% | 3  | 3  | 3  | 0.03% | 9.68%  | YTVTPLSEADGVK     | 2.85 | 1,379.71 |
| ATP | 6018 | Lamin A/C                                                                                           | gi 74354719,gi 77404182               | 65,105.20 | 100.00% | 9  | 11 | 11 | 0.09% | 20.30% | AAYEAE LGDARK     | 3.28 | 1,293.64 |
| ATP | 6018 | Lamin A/C                                                                                           | gi 74354719,gi 77404182               | 65,105.20 | 100.00% | 9  | 11 | 11 | 0.09% | 20.30% | IRDSLSAQLSQLQK    | 3.91 | 1,699.97 |
| ATP | 6018 | Lamin A/C                                                                                           | gi 74354719,gi 77404182               | 65,105.20 | 100.00% | 9  | 11 | 11 | 0.09% | 20.30% | LADALQELR         | 3.12 | 1,028.57 |
| ATP | 6018 | Lamin A/C                                                                                           | gi 74354719,gi 77404182               | 65,105.20 | 100.00% | 9  | 11 | 11 | 0.09% | 20.30% | LKDLEALLNSK       | 3.3  | 1,243.73 |
| ATP | 6018 | Lamin A/C                                                                                           | gi 74354719,gi 77404182               | 65,105.20 | 100.00% | 9  | 11 | 11 | 0.09% | 20.30% | LQEKELQELNDR      | 4.73 | 1,629.81 |
| ATP | 6018 | Lamin A/C                                                                                           | gi 74354719,gi 77404182               | 65,105.20 | 100.00% | 9  | 11 | 11 | 0.09% | 20.30% | LQTLKEELDFQK      | 2.42 | 1,491.81 |
| ATP | 6018 | Lamin A/C                                                                                           | gi 74354719,gi 77404182               | 65,105.20 | 100.00% | 9  | 11 | 11 | 0.09% | 20.30% | MQQQLD EYQELL DIK | 3.68 | 1,909.92 |
| ATP | 6018 | Lamin A/C                                                                                           | gi 74354719,gi 77404182               | 65,105.20 | 100.00% | 9  | 11 | 11 | 0.09% | 20.30% | TALINST GEEVAM RK | 3.53 | 1,635.84 |
| ATP | 6018 | Lamin A/C                                                                                           | gi 74354719,gi 77404182               | 65,105.20 | 100.00% | 9  | 11 | 11 | 0.09% | 20.30% | VAVEEV DEEGKF VR  | 3.61 | 1,605.81 |
| ATP | 6018 | serpin peptidase inhibitor, clade H (heat shock protein 47), member 1, (collagen binding protein 1) | gi 114051505,gi 116256076,gi 86821084 | 46,490.00 | 100.00% | 11 | 15 | 27 | 0.23% | 36.80% | AVAISLPK          | 2.03 | 798.5084 |

|     |      |                                                                                                                                         |                                                   |           |         |    |    |    |       |        |                                            |      |          |
|-----|------|-----------------------------------------------------------------------------------------------------------------------------------------|---------------------------------------------------|-----------|---------|----|----|----|-------|--------|--------------------------------------------|------|----------|
| ATP | 6018 | serpin<br>peptidase<br>inhibitor,<br>clade H<br>(heat<br>shock<br>protein<br>47),<br>member<br>1,<br>(collagen<br>binding<br>protein 1) | gi 1140515<br>05,gi 11625<br>6076,gi 868<br>21084 | 46,490.00 | 100.00% | 11 | 15 | 27 | 0.23% | 36.80% | AVLSAE<br>QLRDDE<br>VHAGLG<br>ELLR         | 5.35 | 2,391.26 |
| ATP | 6018 | serpin<br>peptidase<br>inhibitor,<br>clade H<br>(heat<br>shock<br>protein<br>47),<br>member<br>1,<br>(collagen<br>binding<br>protein 1) | gi 1140515<br>05,gi 11625<br>6076,gi 868<br>21084 | 46,490.00 | 100.00% | 11 | 15 | 27 | 0.23% | 36.80% | DQAVEN<br>ILLSPVV<br>VASSLG<br>LVSLGG<br>K | 5.94 | 2,565.45 |
| ATP | 6018 | serpin<br>peptidase<br>inhibitor,<br>clade H<br>(heat<br>shock<br>protein<br>47),<br>member<br>1,<br>(collagen<br>binding<br>protein 1) | gi 1140515<br>05,gi 11625<br>6076,gi 868<br>21084 | 46,490.00 | 100.00% | 11 | 15 | 27 | 0.23% | 36.80% | DTQSGS<br>LLFIGR                           | 2.86 | 1,293.68 |
| ATP | 6018 | serpin<br>peptidase<br>inhibitor,<br>clade H<br>(heat<br>shock<br>protein<br>47),<br>member<br>1,<br>(collagen<br>binding<br>protein 1) | gi 1140515<br>05,gi 11625<br>6076,gi 868<br>21084 | 46,490.00 | 100.00% | 11 | 15 | 27 | 0.23% | 36.80% | GVVEVT<br>HDLQK                            | 3.94 | 1,224.66 |

|     |      |                                                                                                                                         |                                                   |           |         |    |    |    |       |        |                          |      |          |
|-----|------|-----------------------------------------------------------------------------------------------------------------------------------------|---------------------------------------------------|-----------|---------|----|----|----|-------|--------|--------------------------|------|----------|
| ATP | 6018 | serpin<br>peptidase<br>inhibitor,<br>clade H<br>(heat<br>shock<br>protein<br>47),<br>member<br>1,<br>(collagen<br>binding<br>protein 1) | gi 1140515<br>05,gi 11625<br>6076,gi 868<br>21084 | 46,490.00 | 100.00% | 11 | 15 | 27 | 0.23% | 36.80% | HLAGLG<br>LTEAIDK<br>NK  | 5.36 | 1,579.88 |
| ATP | 6018 | serpin<br>peptidase<br>inhibitor,<br>clade H<br>(heat<br>shock<br>protein<br>47),<br>member<br>1,<br>(collagen<br>binding<br>protein 1) | gi 1140515<br>05,gi 11625<br>6076,gi 868<br>21084 | 46,490.00 | 100.00% | 11 | 15 | 27 | 0.23% | 36.80% | KAVAIISL<br>PK           | 2.97 | 926.6034 |
| ATP | 6018 | serpin<br>peptidase<br>inhibitor,<br>clade H<br>(heat<br>shock<br>protein<br>47),<br>member<br>1,<br>(collagen<br>binding<br>protein 1) | gi 1140515<br>05,gi 11625<br>6076,gi 868<br>21084 | 46,490.00 | 100.00% | 11 | 15 | 27 | 0.23% | 36.80% | LFYADH<br>PFIFLVR        | 3.4  | 1,637.88 |
| ATP | 6018 | serpin<br>peptidase<br>inhibitor,<br>clade H<br>(heat<br>shock<br>protein<br>47),<br>member<br>1,<br>(collagen<br>binding<br>protein 1) | gi 1140515<br>05,gi 11625<br>6076,gi 868<br>21084 | 46,490.00 | 100.00% | 11 | 15 | 27 | 0.23% | 36.80% | LSSLIIM<br>PHHVEP<br>LER | 3.21 | 2,000.10 |

|     |      |                                                                                                                                         |                                                   |           |         |    |    |    |       |        |                                       |      |          |
|-----|------|-----------------------------------------------------------------------------------------------------------------------------------------|---------------------------------------------------|-----------|---------|----|----|----|-------|--------|---------------------------------------|------|----------|
| ATP | 6018 | serpin<br>peptidase<br>inhibitor,<br>clade H<br>(heat<br>shock<br>protein<br>47),<br>member<br>1,<br>(collagen<br>binding<br>protein 1) | gi 1140515<br>05,gi 11625<br>6076,gi 868<br>21084 | 46,490.00 | 100.00% | 11 | 15 | 27 | 0.23% | 36.80% | LYGPSS<br>VSFAED<br>FVR               | 4.34 | 1,673.82 |
| ATP | 6018 | serpin<br>peptidase<br>inhibitor,<br>clade H<br>(heat<br>shock<br>protein<br>47),<br>member<br>1,<br>(collagen<br>binding<br>protein 1) | gi 1140515<br>05,gi 11625<br>6076,gi 868<br>21084 | 46,490.00 | 100.00% | 11 | 15 | 27 | 0.23% | 36.80% | SAGLAF<br>SLYQAM<br>AK                | 3.88 | 1,473.74 |
| ATP | 6018 | PREDIC<br>TED:<br>hypotheti<br>cal<br>protein                                                                                           | gi 1946673<br>11                                  | 68,113.30 | 100.00% | 5  | 8  | 8  | 0.07% | 9.11%  | ELESQIS<br>ELQEDL<br>ESER             | 4.21 | 2,033.95 |
| ATP | 6018 | PREDIC<br>TED:<br>hypotheti<br>cal<br>protein                                                                                           | gi 1946673<br>11                                  | 68,113.30 | 100.00% | 5  | 8  | 8  | 0.07% | 9.11%  | IRELESQ<br>ISELQED<br>LESER           | 5.65 | 2,303.14 |
| ATP | 6018 | PREDIC<br>TED:<br>hypotheti<br>cal<br>protein                                                                                           | gi 1946673<br>11                                  | 68,113.30 | 100.00% | 5  | 8  | 8  | 0.07% | 9.11%  | KLEGDS<br>TDLNDQ<br>IAELQAQ<br>IAELK  | 5.35 | 2,642.35 |
| ATP | 6018 | PREDIC<br>TED:<br>hypotheti<br>cal<br>protein                                                                                           | gi 1946673<br>11                                  | 68,113.30 | 100.00% | 5  | 8  | 8  | 0.07% | 9.11%  | RKLEGD<br>STDLND<br>QIAELQA<br>QIAELK | 3.81 | 2,798.45 |
| ATP | 6018 | PREDIC<br>TED:<br>hypotheti<br>cal<br>protein                                                                                           | gi 1946673<br>11                                  | 68,113.30 | 100.00% | 5  | 8  | 8  | 0.07% | 9.11%  | XXXXXX<br>XXXXXX                      | 3.4  | 1,240.02 |
| ATP | 6018 | PREDIC<br>TED:<br>transmem<br>brane<br>emp24<br>protein<br>transport<br>domain<br>containin<br>g 4                                      | gi 1946663<br>84                                  | 37,465.50 | 100.00% | 3  | 4  | 4  | 0.03% | 7.76%  | DKLTEL<br>QLR                         | 3.36 | 1,115.64 |



|     |      |                                                                           |                                                                               |            |         |    |    |    |       |        |                                             |      |          |
|-----|------|---------------------------------------------------------------------------|-------------------------------------------------------------------------------|------------|---------|----|----|----|-------|--------|---------------------------------------------|------|----------|
| ATP | 6018 | PREDIC TED:<br>transmembrane emp24 protein transport domain containin g 4 | gi 1946663<br>84                                                              | 37,465.50  | 100.00% | 3  | 4  | 4  | 0.03% | 7.76%  | QLLDQV<br>EQIQK                             | 3.78 | 1,341.74 |
| ATP | 6018 | PREDIC TED:<br>transmembrane emp24 protein transport domain containin g 4 | gi 1946663<br>84                                                              | 37,465.50  | 100.00% | 3  | 4  | 4  | 0.03% | 7.76%  | QLLDQV<br>EQIQKE<br>QDYQR                   | 3.55 | 2,161.09 |
| ATP | 6018 | NNT protein                                                               | gi 1337774<br>77,gi 16339<br>7,gi 163410<br>.gi 1720455<br>66,gi 27806<br>831 | 113,839.20 | 100.00% | 11 | 15 | 22 | 0.19% | 14.70% | AVVLA<br>A<br>NHFR                          | 2.36 | 1,154.64 |
| ATP | 6018 | NNT protein                                                               | gi 1337774<br>77,gi 16339<br>7,gi 163410<br>.gi 1720455<br>66,gi 27806<br>831 | 113,839.20 | 100.00% | 11 | 15 | 22 | 0.19% | 14.70% | DGQVIFP<br>APTPK                            | 2.61 | 1,269.68 |
| ATP | 6018 | NNT protein                                                               | gi 1337774<br>77,gi 16339<br>7,gi 163410<br>.gi 1720455<br>66,gi 27806<br>831 | 113,839.20 | 100.00% | 11 | 15 | 22 | 0.19% | 14.70% | FFTQGIT<br>AAGK                             | 3.18 | 1,140.60 |
| ATP | 6018 | NNT protein                                                               | gi 1337774<br>77,gi 16339<br>7,gi 163410<br>.gi 1720455<br>66,gi 27806<br>831 | 113,839.20 | 100.00% | 11 | 15 | 22 | 0.19% | 14.70% | GITHIGY<br>TDLPSR                           | 4.61 | 1,429.74 |
| ATP | 6018 | NNT protein                                                               | gi 1337774<br>77,gi 16339<br>7,gi 163410<br>.gi 1720455<br>66,gi 27806<br>831 | 113,839.20 | 100.00% | 11 | 15 | 22 | 0.19% | 14.70% | GTVVM<br>KDGQVI<br>FPATPK                   | 3.24 | 1,901.02 |
| ATP | 6018 | NNT protein                                                               | gi 1337774<br>77,gi 16339<br>7,gi 163410<br>.gi 1720455<br>66,gi 27806<br>831 | 113,839.20 | 100.00% | 11 | 15 | 22 | 0.19% | 14.70% | MATQAS<br>TLYSNNI<br>TK                     | 5.63 | 1,658.81 |
| ATP | 6018 | NNT protein                                                               | gi 1337774<br>77,gi 16339<br>7,gi 163410<br>.gi 1720455<br>66,gi 27806<br>831 | 113,839.20 | 100.00% | 11 | 15 | 22 | 0.19% | 14.70% | SLGAEPL<br>EVDLK                            | 3.26 | 1,270.69 |
| ATP | 6018 | NNT protein                                                               | gi 1337774<br>77,gi 16339<br>7,gi 163410<br>.gi 1720455<br>66,gi 27806<br>831 | 113,839.20 | 100.00% | 11 | 15 | 22 | 0.19% | 14.70% | SLGVGY<br>AAVDNP<br>IFYKPNT<br>AMLLGD<br>AK | 2.99 | 2,841.45 |

|     |      |                                                          |                                                                               |            |         |    |    |    |       |        |                                  |      |          |
|-----|------|----------------------------------------------------------|-------------------------------------------------------------------------------|------------|---------|----|----|----|-------|--------|----------------------------------|------|----------|
| ATP | 6018 | NNT protein                                              | gi 1337774<br>77,gi 16339<br>7,gi 163410<br>,gi 1720455<br>66,gi 27806<br>831 | 113,839.20 | 100.00% | 11 | 15 | 22 | 0.19% | 14.70% | TSGTLIS<br>FIYPAQN<br>PDLLNK     | 3.2  | 2,192.16 |
| ATP | 6018 | NNT protein                                              | gi 1337774<br>77,gi 16339<br>7,gi 163410<br>,gi 1720455<br>66,gi 27806<br>831 | 113,839.20 | 100.00% | 11 | 15 | 22 | 0.19% | 14.70% | VALSPA<br>GVQALV<br>K            | 3.59 | 1,252.76 |
| ATP | 6018 | NNT protein                                              | gi 1337774<br>77,gi 16339<br>7,gi 163410<br>,gi 1720455<br>66,gi 27806<br>831 | 113,839.20 | 100.00% | 11 | 15 | 22 | 0.19% | 14.70% | VTIAQG<br>YDALSS<br>MANIAG<br>YK | 5    | 2,089.03 |
| ATP | 6018 | Transmembrane emp24-like traffickin g protein 10 (yeast) | gi 1337781<br>87,gi 59858<br>463,gi 6290<br>1402,gi 949<br>66895              | 24,810.80  | 100.00% | 8  | 13 | 27 | 0.23% | 29.70% | IPDQLVI<br>LDMK                  | 4.3  | 1,300.72 |
| ATP | 6018 | Transmembrane emp24-like traffickin g protein 10 (yeast) | gi 1337781<br>87,gi 59858<br>463,gi 6290<br>1402,gi 949<br>66895              | 24,810.80  | 100.00% | 8  | 13 | 27 | 0.23% | 29.70% | ITDSAGH<br>ILYSK                 | 4.78 | 1,304.68 |
| ATP | 6018 | Transmembrane emp24-like traffickin g protein 10 (yeast) | gi 1337781<br>87,gi 59858<br>463,gi 6290<br>1402,gi 949<br>66895              | 24,810.80  | 100.00% | 8  | 13 | 27 | 0.23% | 29.70% | ITDSAGH<br>ILYSKED<br>ATK        | 3.58 | 1,848.93 |
| ATP | 6018 | Transmembrane emp24-like traffickin g protein 10 (yeast) | gi 1337781<br>87,gi 59858<br>463,gi 6290<br>1402,gi 949<br>66895              | 24,810.80  | 100.00% | 8  | 13 | 27 | 0.23% | 29.70% | LEDLSES<br>IVNDFA<br>YMK         | 4.07 | 1,889.88 |
| ATP | 6018 | Transmembrane emp24-like traffickin g protein 10 (yeast) | gi 1337781<br>87,gi 59858<br>463,gi 6290<br>1402,gi 949<br>66895              | 24,810.80  | 100.00% | 8  | 13 | 27 | 0.23% | 29.70% | LKPLEV<br>ELR                    | 3.43 | 1,096.67 |
| ATP | 6018 | Transmembrane emp24-like traffickin g protein 10 (yeast) | gi 1337781<br>87,gi 59858<br>463,gi 6290<br>1402,gi 949<br>66895              | 24,810.80  | 100.00% | 8  | 13 | 27 | 0.23% | 29.70% | NYEEIA<br>KVEK                   | 3.49 | 1,222.63 |

|     |      |                                                                     |                                                  |            |         |   |    |    |       |        |                                                            |          |
|-----|------|---------------------------------------------------------------------|--------------------------------------------------|------------|---------|---|----|----|-------|--------|------------------------------------------------------------|----------|
| ATP | 6018 | Transmembrane emp24-like traffickin g protein 10 (yeast)            | gi 133778187,gi 59858463,gi 62901402,gi 94966895 | 24,810.80  | 100.00% | 8 | 13 | 27 | 0.23% | 29.70% | RLEDLSE 4.3<br>SIVNDFA<br>YMK                              | 2,045.99 |
| ATP | 6018 | Transmembrane emp24-like traffickin g protein 10 (yeast)            | gi 133778187,gi 59858463,gi 62901402,gi 94966895 | 24,810.80  | 100.00% | 8 | 13 | 27 | 0.23% | 29.70% | RLEDLSE 5.74<br>SIVNDFA<br>YMKK                            | 2,174.08 |
| ATP | 6018 | signal recognition particle receptor                                | gi 115497558,gi 122139924,gi 75773717            | 69,879.80  | 100.00% | 4 | 4  | 5  | 0.04% | 10.00% | LIDGIVL 3.71<br>TK                                         | 971.6138 |
| ATP | 6018 | signal recognition particle receptor                                | gi 115497558,gi 122139924,gi 75773717            | 69,879.80  | 100.00% | 4 | 4  | 5  | 0.04% | 10.00% | LITVNTPT 3.23<br>DLVLFV<br>GEALVG<br>NEAVDQ<br>LVK         | 2,966.65 |
| ATP | 6018 | signal recognition particle receptor                                | gi 115497558,gi 122139924,gi 75773717            | 69,879.80  | 100.00% | 4 | 4  | 5  | 0.04% | 10.00% | NQGFVDV 4.64<br>VLVDTA<br>GR                               | 1,490.76 |
| ATP | 6018 | signal recognition particle receptor                                | gi 115497558,gi 122139924,gi 75773717            | 69,879.80  | 100.00% | 4 | 4  | 5  | 0.04% | 10.00% | VMGTFS 2.86<br>TVTSTV<br>K                                 | 1,373.70 |
| ATP | 6018 | nitrogen fixation protein [Staphylococcus aureus RF122]             | gi 82656058,gi 82750527                          | 16,998.60  | 99.80%  | 2 | 2  | 2  | 0.02% | 28.60% | EGKAEG 2.16<br>TTEE                                        | 1,179.50 |
| ATP | 6018 | nitrogen fixation protein [Staphylococcus aureus RF122]             | gi 82656058,gi 82750527                          | 16,998.60  | 99.80%  | 2 | 2  | 2  | 0.02% | 28.60% | GVLDNG 3.03<br>SMTVD<br>MNNPTC<br>GDRIRLT<br>FDIEDGII<br>K | 3,609.74 |
| ATP | 6018 | solute carrier family 4, sodium bicarbonate cotransporter, member 7 | gi 219282724                                     | 135,822.00 | 100.00% | 4 | 4  | 4  | 0.03% | 5.34%  | FLFLLG 2.94<br>PAGK                                        | 1,175.72 |
| ATP | 6018 | solute carrier family 4, sodium bicarbonate cotransporter, member 7 | gi 219282724                                     | 135,822.00 | 100.00% | 4 | 4  | 4  | 0.03% | 5.34%  | GPDEEA 3.16<br>VVDLGK                                      | 1,228.61 |

|     |      |                                                                     |                                                  |            |         |   |   |   |       |        |                                             |      |          |
|-----|------|---------------------------------------------------------------------|--------------------------------------------------|------------|---------|---|---|---|-------|--------|---------------------------------------------|------|----------|
| ATP | 6018 | solute carrier family 4, sodium bicarbonate cotransporter, member 7 | gi 219282724                                     | 135,822.00 | 100.00% | 4 | 4 | 4 | 0.03% | 5.34%  | LAPAVL<br>LSGLTE<br>VPVPTR                  | 3.29 | 1,833.08 |
| ATP | 6018 | solute carrier family 4, sodium bicarbonate cotransporter, member 7 | gi 219282724                                     | 135,822.00 | 100.00% | 4 | 4 | 4 | 0.03% | 5.34%  | MLQAGE<br>DTVHLP<br>FEGGSLL<br>QIPVK        | 4    | 2,595.35 |
| ATP | 6018 | Stromal interaction molecule 1                                      | gi 154426132,gi 61555683,gi 75057528,gi 78369570 | 77,134.40  | 100.00% | 3 | 3 | 3 | 0.03% | 7.47%  | ALDTV<br>FGPPLLR                            | 3.47 | 1,512.88 |
| ATP | 6018 | Stromal interaction molecule 1                                      | gi 154426132,gi 61555683,gi 75057528,gi 78369570 | 77,134.40  | 100.00% | 3 | 3 | 3 | 0.03% | 7.47%  | DLTHSD<br>SESSLH<br>MSDR                    | 3.09 | 1,832.77 |
| ATP | 6018 | Stromal interaction molecule 1                                      | gi 154426132,gi 61555683,gi 75057528,gi 78369570 | 77,134.40  | 100.00% | 3 | 3 | 3 | 0.03% | 7.47%  | KAAAE<br>DNGSIG<br>ETDSSPGR                 | 4.03 | 2,119.94 |
| ATP | 6018 | emerin                                                              | gi 37781186,gi 42733600,gi 74356375              | 29,454.80  | 100.00% | 5 | 6 | 7 | 0.06% | 27.20% | FSDLDS<br>ASVDS<br>MYDLPK                   | 3.67 | 2,020.87 |
| ATP | 6018 | emerin                                                              | gi 37781186,gi 42733600,gi 74356375              | 29,454.80  | 100.00% | 5 | 6 | 7 | 0.06% | 27.20% | FSDLDS<br>ASVDS<br>MYDLPK<br>KEDALL<br>YQSK | 4.44 | 3,196.49 |
| ATP | 6018 | emerin                                                              | gi 37781186,gi 42733600,gi 74356375              | 29,454.80  | 100.00% | 5 | 6 | 7 | 0.06% | 27.20% | GYND<br>YEESYL<br>TTR                       | 3.57 | 1,888.79 |
| ATP | 6018 | emerin                                                              | gi 37781186,gi 42733600,gi 74356375              | 29,454.80  | 100.00% | 5 | 6 | 7 | 0.06% | 27.20% | LSPPSS<br>ASSFSYR                           | 2.25 | 1,472.70 |
| ATP | 6018 | emerin                                                              | gi 37781186,gi 42733600,gi 74356375              | 29,454.80  | 100.00% | 5 | 6 | 7 | 0.06% | 27.20% | QYNIPH<br>GPVVGSTR                          | 2.84 | 1,524.79 |
| ATP | 6018 | alpha S1 casein                                                     | gi 159793209,gi 195973860,gi 30794348            | 24,425.40  | 99.80%  | 2 | 2 | 2 | 0.02% | 10.30% | FFVAFP<br>EVFGK                             | 2.97 | 1,384.73 |
| ATP | 6018 | alpha S1 casein                                                     | gi 159793209,gi 195973860,gi 30794348            | 24,425.40  | 99.80%  | 2 | 2 | 2 | 0.02% | 10.30% | YLGYLE<br>QLLR                              | 2.99 | 1,267.70 |
| ATP | 6018 | PREDICTED: nestin                                                   | gi 76612380                                      | 175,609.70 | 99.80%  | 2 | 2 | 2 | 0.02% | 2.85%  | GPPAPAP<br>EVEELAQ<br>R                     | 3.56 | 1,560.80 |

|     |      |                                              |                                                              |            |         |   |   |   |       |        |                                                      |          |
|-----|------|----------------------------------------------|--------------------------------------------------------------|------------|---------|---|---|---|-------|--------|------------------------------------------------------|----------|
| ATP | 6018 | PREDIC TED:<br>nestin                        | gi 7661238<br>0                                              | 175,609.70 | 99.80%  | 2 | 2 | 2 | 0.02% | 2.85%  | RPGPLLS 2.84<br>VLSPTPL<br>SSPLPGT<br>LETPVPT<br>FLK | 3,211.83 |
| ATP | 6018 | PREDIC TED:<br>similar to Rab5B isoform 3    | gi 7661873<br>2                                              | 23,703.00  | 99.80%  | 2 | 2 | 2 | 0.02% | 22.80% | LVLLGE 3.81<br>SAVGK                                 | 1,085.66 |
| ATP | 6018 | PREDIC TED:<br>similar to Rab5B isoform 3    | gi 7661873<br>2                                              | 23,703.00  | 99.80%  | 2 | 2 | 2 | 0.02% | 22.80% | QASPSIV 2.99<br>IALAGN<br>K                          | 1,368.78 |
| ATP | 6018 | PREDIC TED:<br>similar to Rab5B isoform 3    | gi 7661873<br>2                                              | 23,703.00  | 99.80%  | 2 | 2 | 2 | 0.02% | 22.80% | TAMNVN 2.96<br>DLFLAIA<br>K                          | 1,536.81 |
| ATP | 6018 | PREDIC TED:<br>similar to Rab5B isoform 3    | gi 7661873<br>2                                              | 23,703.00  | 99.80%  | 2 | 2 | 2 | 0.02% | 22.80% | YHSLAP 2.6<br>MYR                                    | 1,316.61 |
| ATP | 6018 | RAP2C, member of RAS oncogene family         | gi 1153050<br>20,gi 11549<br>6672,gi 122<br>132271           | 20,726.50  | 99.80%  | 2 | 2 | 2 | 0.02% | 33.90% | EIEVDSS 5.29<br>PSVLEIL<br>DTAGTE<br>QFASMR          | 2,840.35 |
| ATP | 6018 | RAP2C, member of RAS oncogene family         | gi 1153050<br>20,gi 11549<br>6672,gi 122<br>132271           | 20,726.50  | 99.80%  | 2 | 2 | 2 | 0.02% | 33.90% | SMVDEL 2.88<br>FAEIVR                                | 1,424.71 |
| ATP | 6018 | RAP2C, member of RAS oncogene family         | gi 1153050<br>20,gi 11549<br>6672,gi 122<br>132271           | 20,726.50  | 99.80%  | 2 | 2 | 2 | 0.02% | 33.90% | VPLILVG 3.51<br>NKVDLE<br>PEREVM<br>SSEGR            | 2,682.41 |
| ATP | 6018 | Lu-ECAM-1                                    | gi 2623763,<br>gi 2623765,<br>gi 2623767,<br>gi 3079432<br>6 | 100,991.10 | 100.00% | 3 | 3 | 3 | 0.03% | 4.53%  | QESYDQ 4.39<br>ADVIVA<br>NPYLK                       | 1,952.96 |
| ATP | 6018 | Lu-ECAM-1                                    | gi 2623763,<br>gi 2623765,<br>gi 2623767,<br>gi 3079432<br>6 | 100,991.10 | 100.00% | 3 | 3 | 3 | 0.03% | 4.53%  | TSDFKE 3.15<br>DKLNIR                                | 1,465.76 |
| ATP | 6018 | Lu-ECAM-1                                    | gi 2623763,<br>gi 2623765,<br>gi 2623767,<br>gi 3079432<br>6 | 100,991.10 | 100.00% | 3 | 3 | 3 | 0.03% | 4.53%  | YGDDPY 3.59<br>TLQYGR                                | 1,447.65 |
| ATP | 6018 | RecName :<br>Full=Ras-related protein Rab-7a | gi 1088609<br>19,gi 74354<br>082,gi 7804<br>5539             | 23,526.10  | 100.00% | 4 | 4 | 6 | 0.05% | 21.30% | ATIGADF 2.9<br>LTK                                   | 1,036.57 |
| ATP | 6018 | RecName :<br>Full=Ras-related protein Rab-7a | gi 1088609<br>19,gi 74354<br>082,gi 7804<br>5539             | 23,526.10  | 100.00% | 4 | 4 | 6 | 0.05% | 21.30% | DPENFPF 4.85<br>VVLGNK                               | 1,475.75 |

|     |      |                                                                                               |                              |         |    |    |    |       |        |                                     |      |          |
|-----|------|-----------------------------------------------------------------------------------------------|------------------------------|---------|----|----|----|-------|--------|-------------------------------------|------|----------|
| ATP | 6018 | RecName gi1088609<br>: 19,gi74354<br>Full=Ras-082,gi7804<br>related 5539<br>protein<br>Rab-7a | 23,526.10                    | 100.00% | 4  | 4  | 6  | 0.05% | 21.30% | FQSLGV<br>AFYR                      | 3.06 | 1,187.62 |
| ATP | 6018 | RecName gi1088609<br>: 19,gi74354<br>Full=Ras-082,gi7804<br>related 5539<br>protein<br>Rab-7a | 23,526.10                    | 100.00% | 4  | 4  | 6  | 0.05% | 21.30% | VIILGDS<br>GVGK                     | 2.63 | 1,057.63 |
| ATP | 6018 | heat shock<br>70kDa<br>protein 8                                                              | gi1462317<br>04<br>71,224.20 | 100.00% | 13 | 16 | 20 | 0.17% | 28.80% | ARFEEL<br>NADLFR                    | 4.08 | 1,480.75 |
| ATP | 6018 | heat shock<br>70kDa<br>protein 8                                                              | gi1462317<br>04<br>71,224.20 | 100.00% | 13 | 16 | 20 | 0.17% | 28.80% | DAGTIA<br>GLNVLR                    | 2.87 | 1,199.67 |
| ATP | 6018 | heat shock<br>70kDa<br>protein 8                                                              | gi1462317<br>04<br>71,224.20 | 100.00% | 13 | 16 | 20 | 0.17% | 28.80% | IINEPTA<br>AAIAYG<br>LDK            | 4.25 | 1,659.90 |
| ATP | 6018 | heat shock<br>70kDa<br>protein 8                                                              | gi1462317<br>04<br>71,224.20 | 100.00% | 13 | 16 | 20 | 0.17% | 28.80% | IINEPTA<br>AAIAYG<br>LDKK           | 2.93 | 1,787.99 |
| ATP | 6018 | heat shock<br>70kDa<br>protein 8                                                              | gi1462317<br>04<br>71,224.20 | 100.00% | 13 | 16 | 20 | 0.17% | 28.80% | LDKSQIH<br>DIVLVG<br>GSTR           | 3.96 | 1,838.01 |
| ATP | 6018 | heat shock<br>70kDa<br>protein 8                                                              | gi1462317<br>04<br>71,224.20 | 100.00% | 13 | 16 | 20 | 0.17% | 28.80% | LLQDFD<br>NGK                       | 2.75 | 1,081.57 |
| ATP | 6018 | heat shock<br>70kDa<br>protein 8                                                              | gi1462317<br>04<br>71,224.20 | 100.00% | 13 | 16 | 20 | 0.17% | 28.80% | MVNHFI<br>AEFK                      | 2.64 | 1,251.62 |
| ATP | 6018 | heat shock<br>70kDa<br>protein 8                                                              | gi1462317<br>04<br>71,224.20 | 100.00% | 13 | 16 | 20 | 0.17% | 28.80% | NQVAM<br>NPTNTV<br>FDAQ             | 4.7  | 1,665.79 |
| ATP | 6018 | heat shock<br>70kDa<br>protein 8                                                              | gi1462317<br>04<br>71,224.20 | 100.00% | 13 | 16 | 20 | 0.17% | 28.80% | NSLESY<br>AFNMK                     | 2.77 | 1,319.59 |
| ATP | 6018 | heat shock<br>70kDa<br>protein 8                                                              | gi1462317<br>04<br>71,224.20 | 100.00% | 13 | 16 | 20 | 0.17% | 28.80% | SFYPEEV<br>SSMVL<br>TK              | 2.63 | 1,632.78 |
| ATP | 6018 | heat shock<br>70kDa<br>protein 8                                                              | gi1462317<br>04<br>71,224.20 | 100.00% | 13 | 16 | 20 | 0.17% | 28.80% | SINPDEA<br>VAYGAA<br>VQAAILS<br>GDK | 2.78 | 2,260.15 |
| ATP | 6018 | heat shock<br>70kDa<br>protein 8                                                              | gi1462317<br>04<br>71,224.20 | 100.00% | 13 | 16 | 20 | 0.17% | 28.80% | STAGDT<br>HLGGED<br>FDNR            | 2.93 | 1,691.73 |
| ATP | 6018 | heat shock<br>70kDa<br>protein 8                                                              | gi1462317<br>04<br>71,224.20 | 100.00% | 13 | 16 | 20 | 0.17% | 28.80% | TTPSYV<br>AFTDTE<br>R               | 3.42 | 1,487.70 |
| ATP | 6018 | heat shock<br>70kDa<br>protein 8                                                              | gi1462317<br>04<br>71,224.20 | 100.00% | 13 | 16 | 20 | 0.17% | 28.80% | TVTNAV<br>VTVPAY<br>FNDSQR          | 3.18 | 1,982.00 |

|     |      |                                                  |                                       |            |         |   |   |    |       |        |                                     |      |          |
|-----|------|--------------------------------------------------|---------------------------------------|------------|---------|---|---|----|-------|--------|-------------------------------------|------|----------|
| ATP | 6018 | ras homolog gene family, member G                | gi 122692461.gi 92096969              | 21,261.90  | 99.80%  | 2 | 2 | 2  | 0.02% | 19.90% | EYIPTVF<br>DNYSAQ<br>SAVDGR         | 4.39 | 2,131.99 |
| ATP | 6018 | ras homolog gene family, member G                | gi 122692461.gi 92096969              | 21,261.90  | 99.80%  | 2 | 2 | 2  | 0.02% | 19.90% | LKEQQQ<br>APITPQQ<br>GQALAK         | 4.28 | 2,006.10 |
| ATP | 6018 | solute carrier family 25, member A6              | gi 119936593.gi 151557097.gi 32189336 | 32,860.40  | 100.00% | 7 | 8 | 53 | 0.45% | 21.50% | AAAYFGI<br>YDTAK                    | 3.86 | 1,219.60 |
| ATP | 6018 | solute carrier family 25, member A6              | gi 119936593.gi 151557097.gi 32189336 | 32,860.40  | 100.00% | 7 | 8 | 53 | 0.45% | 21.50% | DFLAGGI<br>AAAISK                   | 4.8  | 1,233.68 |
| ATP | 6018 | solute carrier family 25, member A6              | gi 119936593.gi 151557097.gi 32189336 | 32,860.40  | 100.00% | 7 | 8 | 53 | 0.45% | 21.50% | GMGGAF<br>VLVLYD<br>ELK             | 5.1  | 1,627.84 |
| ATP | 6018 | solute carrier family 25, member A6              | gi 119936593.gi 151557097.gi 32189336 | 32,860.40  | 100.00% | 7 | 8 | 53 | 0.45% | 21.50% | GMGGAF<br>VLVLYD<br>ELKK            | 3.07 | 1,755.94 |
| ATP | 6018 | solute carrier family 25, member A6              | gi 119936593.gi 151557097.gi 32189336 | 32,860.40  | 100.00% | 7 | 8 | 53 | 0.45% | 21.50% | LLLQVQ<br>HASK                      | 2.98 | 1,136.68 |
| ATP | 6018 | solute carrier family 25, member A6              | gi 119936593.gi 151557097.gi 32189336 | 32,860.40  | 100.00% | 7 | 8 | 53 | 0.45% | 21.50% | YFPTQA<br>LNFAFK                    | 3.9  | 1,446.74 |
| ATP | 6018 | solute carrier family 25, member A6              | gi 119936593.gi 151557097.gi 32189336 | 32,860.40  | 100.00% | 7 | 8 | 53 | 0.45% | 21.50% | YFPTQA<br>LNFAFK<br>DK              | 4.15 | 1,689.86 |
| ATP | 6018 | PREDICTED: insulin-like growth factor 1 receptor | gi 119913553                          | 135,693.80 | 99.90%  | 2 | 3 | 3  | 0.03% | 3.24%  | ELGQGS<br>FGMVYE<br>GVAK            | 3.26 | 1,687.80 |
| ATP | 6018 | PREDICTED: insulin-like growth factor 1 receptor | gi 119913553                          | 135,693.80 | 99.90%  | 2 | 3 | 3  | 0.03% | 3.24%  | GNNIASE<br>LENFMG<br>LIEVVTG<br>YVK | 3.55 | 2,513.26 |

|     |      |                                                                                                         |                  |            |         |    |    |    |       |        |                                 |          |
|-----|------|---------------------------------------------------------------------------------------------------------|------------------|------------|---------|----|----|----|-------|--------|---------------------------------|----------|
| ATP | 6018 | PREDIC<br>TED:<br>similar to<br>filamin<br>B, beta<br>(actin<br>binding<br>protein<br>278)<br>isoform 7 | gi 1946772<br>96 | 277,977.20 | 100.00% | 27 | 31 | 35 | 0.30% | 17.30% | APLNVQ 4.1<br>FSSPGPG<br>DAVK   | 1,683.87 |
| ATP | 6018 | PREDIC<br>TED:<br>similar to<br>filamin<br>B, beta<br>(actin<br>binding<br>protein<br>278)<br>isoform 7 | gi 1946772<br>96 | 277,977.20 | 100.00% | 27 | 31 | 35 | 0.30% | 17.30% | DLDIIDN 2.92<br>YDYSHT<br>VK    | 1,810.85 |
| ATP | 6018 | PREDIC<br>TED:<br>similar to<br>filamin<br>B, beta<br>(actin<br>binding<br>protein<br>278)<br>isoform 7 | gi 1946772<br>96 | 277,977.20 | 100.00% | 27 | 31 | 35 | 0.30% | 17.30% | EAFNFK 2.76<br>PNVFTV<br>VTR    | 1,722.92 |
| ATP | 6018 | PREDIC<br>TED:<br>similar to<br>filamin<br>B, beta<br>(actin<br>binding<br>protein<br>278)<br>isoform 7 | gi 1946772<br>96 | 277,977.20 | 100.00% | 27 | 31 | 35 | 0.30% | 17.30% | FADEHV 2.65<br>PGSPFTV<br>K     | 1,530.76 |
| ATP | 6018 | PREDIC<br>TED:<br>similar to<br>filamin<br>B, beta<br>(actin<br>binding<br>protein<br>278)<br>isoform 7 | gi 1946772<br>96 | 277,977.20 | 100.00% | 27 | 31 | 35 | 0.30% | 17.30% | GAGIGG 3.35<br>LGITVEG<br>PSESK | 1,628.85 |
| ATP | 6018 | PREDIC<br>TED:<br>similar to<br>filamin<br>B, beta<br>(actin<br>binding<br>protein<br>278)<br>isoform 7 | gi 1946772<br>96 | 277,977.20 | 100.00% | 27 | 31 | 35 | 0.30% | 17.30% | GFQDGV 3.35<br>YAFEYY<br>PSTQGK | 2,056.93 |
| ATP | 6018 | PREDIC<br>TED:<br>similar to<br>filamin<br>B, beta<br>(actin<br>binding<br>protein<br>278)<br>isoform 7 | gi 1946772<br>96 | 277,977.20 | 100.00% | 27 | 31 | 35 | 0.30% | 17.30% | GGLVGK 2.56<br>PAEFTID<br>TK    | 1,532.83 |



|     |      |                                                                                                         |                  |            |         |    |    |    |       |        |                                                            |          |
|-----|------|---------------------------------------------------------------------------------------------------------|------------------|------------|---------|----|----|----|-------|--------|------------------------------------------------------------|----------|
| ATP | 6018 | PREDIC<br>TED:<br>similar to<br>filamin<br>B, beta<br>(actin<br>binding<br>protein<br>278)<br>isoform 7 | gi 1946772<br>96 | 277,977.20 | 100.00% | 27 | 31 | 35 | 0.30% | 17.30% | GLVEPV 6.44<br>NVVDNG<br>DGTHTV<br>TYTPSQ<br>EGPYMV<br>SVK | 3,505.68 |
| ATP | 6018 | PREDIC<br>TED:<br>similar to<br>filamin<br>B, beta<br>(actin<br>binding<br>protein<br>278)<br>isoform 7 | gi 1946772<br>96 | 277,977.20 | 100.00% | 27 | 31 | 35 | 0.30% | 17.30% | GQHVTG 3.9<br>SPFQTV<br>GPLGEG<br>GAHK                     | 2,308.15 |
| ATP | 6018 | PREDIC<br>TED:<br>similar to<br>filamin<br>B, beta<br>(actin<br>binding<br>protein<br>278)<br>isoform 7 | gi 1946772<br>96 | 277,977.20 | 100.00% | 27 | 31 | 35 | 0.30% | 17.30% | IFAQDG 4.1<br>DGQPIDI<br>QMK                               | 1,791.86 |
| ATP | 6018 | PREDIC<br>TED:<br>similar to<br>filamin<br>B, beta<br>(actin<br>binding<br>protein<br>278)<br>isoform 7 | gi 1946772<br>96 | 277,977.20 | 100.00% | 27 | 31 | 35 | 0.30% | 17.30% | IPEIDSSD 3.83<br>MSAHVT<br>SPSGR                           | 2,001.92 |
| ATP | 6018 | PREDIC<br>TED:<br>similar to<br>filamin<br>B, beta<br>(actin<br>binding<br>protein<br>278)<br>isoform 7 | gi 1946772<br>96 | 277,977.20 | 100.00% | 27 | 31 | 35 | 0.30% | 17.30% | IVGPGLG 2.61<br>SGVR                                       | 1,011.59 |
| ATP | 6018 | PREDIC<br>TED:<br>similar to<br>filamin<br>B, beta<br>(actin<br>binding<br>protein<br>278)<br>isoform 7 | gi 1946772<br>96 | 277,977.20 | 100.00% | 27 | 31 | 35 | 0.30% | 17.30% | LDVTILS 3.07<br>PSR                                        | 1,100.63 |
| ATP | 6018 | PREDIC<br>TED:<br>similar to<br>filamin<br>B, beta<br>(actin<br>binding<br>protein<br>278)<br>isoform 7 | gi 1946772<br>96 | 277,977.20 | 100.00% | 27 | 31 | 35 | 0.30% | 17.30% | LIALLEV 2.93<br>LSQK                                       | 1,226.77 |

|     |      |                                                                                                         |                  |            |         |    |    |    |       |        |                                            |      |          |
|-----|------|---------------------------------------------------------------------------------------------------------|------------------|------------|---------|----|----|----|-------|--------|--------------------------------------------|------|----------|
| ATP | 6018 | PREDIC<br>TED:<br>similar to<br>filamin<br>B, beta<br>(actin<br>binding<br>protein<br>278)<br>isoform 7 | gi 1946772<br>96 | 277,977.20 | 100.00% | 27 | 31 | 35 | 0.30% | 17.30% | LTVLSL<br>QESGLK                           | 3.19 | 1,287.75 |
| ATP | 6018 | PREDIC<br>TED:<br>similar to<br>filamin<br>B, beta<br>(actin<br>binding<br>protein<br>278)<br>isoform 7 | gi 1946772<br>96 | 277,977.20 | 100.00% | 27 | 31 | 35 | 0.30% | 17.30% | LVSPGS<br>ANETSSI<br>LVESVT<br>R           | 4.4  | 2,046.07 |
| ATP | 6018 | PREDIC<br>TED:<br>similar to<br>filamin<br>B, beta<br>(actin<br>binding<br>protein<br>278)<br>isoform 7 | gi 1946772<br>96 | 277,977.20 | 100.00% | 27 | 31 | 35 | 0.30% | 17.30% | RLTVLSL<br>QESGLK                          | 3.63 | 1,443.85 |
| ATP | 6018 | PREDIC<br>TED:<br>similar to<br>filamin<br>B, beta<br>(actin<br>binding<br>protein<br>278)<br>isoform 7 | gi 1946772<br>96 | 277,977.20 | 100.00% | 27 | 31 | 35 | 0.30% | 17.30% | SPFEVQ<br>VGPEAG<br>MQK                    | 4.37 | 1,619.77 |
| ATP | 6018 | PREDIC<br>TED:<br>similar to<br>filamin<br>B, beta<br>(actin<br>binding<br>protein<br>278)<br>isoform 7 | gi 1946772<br>96 | 277,977.20 | 100.00% | 27 | 31 | 35 | 0.30% | 17.30% | SPFTVG<br>VAAPLD<br>LSR                    | 4.33 | 1,529.83 |
| ATP | 6018 | PREDIC<br>TED:<br>similar to<br>filamin<br>B, beta<br>(actin<br>binding<br>protein<br>278)<br>isoform 7 | gi 1946772<br>96 | 277,977.20 | 100.00% | 27 | 31 | 35 | 0.30% | 17.30% | VLFAQS<br>EIPTSFP<br>R                     | 3.62 | 1,591.85 |
| ATP | 6018 | PREDIC<br>TED:<br>similar to<br>filamin<br>B, beta<br>(actin<br>binding<br>protein<br>278)<br>isoform 7 | gi 1946772<br>96 | 277,977.20 | 100.00% | 27 | 31 | 35 | 0.30% | 17.30% | VTASGP<br>GLSTYG<br>VPASLP<br>VEFAIDA<br>R | 4.69 | 2,575.34 |

|     |      |                                                                                                     |                           |            |         |    |    |    |       |        |                                                                |          |
|-----|------|-----------------------------------------------------------------------------------------------------|---------------------------|------------|---------|----|----|----|-------|--------|----------------------------------------------------------------|----------|
| ATP | 6018 | PREDICTED:<br>similar to<br>filamin<br>B, beta<br>(actin<br>binding<br>protein<br>278)<br>isoform 7 | gi 1946772<br>96          | 277,977.20 | 100.00% | 27 | 31 | 35 | 0.30% | 17.30% | VTEAEIV 3.5<br>PVGK                                            | 1,141.65 |
| ATP | 6018 | PREDICTED:<br>similar to<br>filamin<br>B, beta<br>(actin<br>binding<br>protein<br>278)<br>isoform 7 | gi 1946772<br>96          | 277,977.20 | 100.00% | 27 | 31 | 35 | 0.30% | 17.30% | VTVLFA 3.57<br>GQHISK                                          | 1,299.74 |
| ATP | 6018 | PREDICTED:<br>similar to<br>filamin<br>B, beta<br>(actin<br>binding<br>protein<br>278)<br>isoform 7 | gi 1946772<br>96          | 277,977.20 | 100.00% | 27 | 31 | 35 | 0.30% | 17.30% | YGGELV 2.5<br>PHFPTR                                           | 1,372.70 |
| ATP | 6018 | PREDICTED:<br>similar to<br>filamin<br>B, beta<br>(actin<br>binding<br>protein<br>278)<br>isoform 7 | gi 1946772<br>96          | 277,977.20 | 100.00% | 27 | 31 | 35 | 0.30% | 17.30% | YMGSHI 6.03<br>PESPLQF<br>YVNYPN<br>SGSVSA<br>YGPGLV<br>YGVANK | 3,978.90 |
| ATP | 6018 | PREDICTED:<br>similar to<br>filamin<br>B, beta<br>(actin<br>binding<br>protein<br>278)<br>isoform 7 | gi 1946772<br>96          | 277,977.20 | 100.00% | 27 | 31 | 35 | 0.30% | 17.30% | YMIGVT 4.6<br>YGGDDI<br>PLSPYR                                 | 2,032.97 |
| ATP | 6018 | PREDICTED:<br>similar to<br>filamin<br>B, beta<br>(actin<br>binding<br>protein<br>278)<br>isoform 7 | gi 1946772<br>96          | 277,977.20 | 100.00% | 27 | 31 | 35 | 0.30% | 17.30% | YTPTQQ 4.65<br>GNMQVL<br>VTYGGD<br>PIPK                        | 2,423.19 |
| ATP | 6018 | plasma membrane calcium-55 transporting ATPase                                                      | gi 1458276<br>2,gi 278072 | 134,738.10 | 100.00% | 4  | 5  | 5  | 0.04% | 13.20% | ADVGF 3.91<br>MGIAGT<br>DVAK                                   | 1,538.75 |

|     |      |                                                                                                      |                           |            |         |   |   |    |       |        |                                                |      |          |
|-----|------|------------------------------------------------------------------------------------------------------|---------------------------|------------|---------|---|---|----|-------|--------|------------------------------------------------|------|----------|
| ATP | 6018 | plasma<br>membran<br>e calcium-55<br>transporti<br>ng<br>ATPase                                      | gi 1458276<br>2,gi 278072 | 134,738.10 | 100.00% | 4 | 5 | 5  | 0.04% | 13.20% | EAGHGT<br>QKEEIP<br>EELAED<br>VEEIDH<br>AER    | 2.68 | 3,189.45 |
| ATP | 6018 | plasma<br>membran<br>e calcium-55<br>transporti<br>ng<br>ATPase                                      | gi 1458276<br>2,gi 278072 | 134,738.10 | 100.00% | 4 | 5 | 5  | 0.04% | 13.20% | EANHDG<br>DFGITLA<br>ELR                       | 3.66 | 1,757.85 |
| ATP | 6018 | plasma<br>membran<br>e calcium-55<br>transporti<br>ng<br>ATPase                                      | gi 1458276<br>2,gi 278072 | 134,738.10 | 100.00% | 4 | 5 | 5  | 0.04% | 13.20% | EASDIL<br>TDDNFT<br>SIVK                       | 4.1  | 1,880.95 |
| ATP | 6018 | plasma<br>membran<br>e calcium-55<br>transporti<br>ng<br>ATPase                                      | gi 1458276<br>2,gi 278072 | 134,738.10 | 100.00% | 4 | 5 | 5  | 0.04% | 13.20% | IDESSLT<br>GESDHV<br>KK                        | 4.05 | 1,644.81 |
| ATP | 6018 | plasma<br>membran<br>e calcium-55<br>transporti<br>ng<br>ATPase                                      | gi 1458276<br>2,gi 278072 | 134,738.10 | 100.00% | 4 | 5 | 5  | 0.04% | 13.20% | KADVGF<br>AMGIAG<br>TDVAK                      | 5.33 | 1,666.85 |
| ATP | 6018 | plasma<br>membran<br>e calcium-55<br>transporti<br>ng<br>ATPase                                      | gi 1458276<br>2,gi 278072 | 134,738.10 | 100.00% | 4 | 5 | 5  | 0.04% | 13.20% | QVVAVT<br>GDGTND<br>GPALK                      | 5.19 | 1,641.84 |
| ATP | 6018 | plasma<br>membran<br>e calcium-55<br>transporti<br>ng<br>ATPase                                      | gi 1458276<br>2,gi 278072 | 134,738.10 | 100.00% | 4 | 5 | 5  | 0.04% | 13.20% | QVVAVT<br>GDGTND<br>GPALKK                     | 3.73 | 1,769.94 |
| ATP | 6018 | plasma<br>membran<br>e calcium-55<br>transporti<br>ng<br>ATPase                                      | gi 1458276<br>2,gi 278072 | 134,738.10 | 100.00% | 4 | 5 | 5  | 0.04% | 13.20% | SLDKDP<br>LLLSGT<br>HVMEGS<br>GR               | 3.87 | 2,128.07 |
| ATP | 6018 | plasma<br>membran<br>e calcium-55<br>transporti<br>ng<br>ATPase                                      | gi 1458276<br>2,gi 278072 | 134,738.10 | 100.00% | 4 | 5 | 5  | 0.04% | 13.20% | SSIHFM<br>THPEFR                               | 3.86 | 1,618.74 |
| ATP | 6018 | plasma<br>membran<br>e calcium-55<br>transporti<br>ng<br>ATPase                                      | gi 1458276<br>2,gi 278072 | 134,738.10 | 100.00% | 4 | 5 | 5  | 0.04% | 13.20% | YGDLLP<br>ADGILIQ<br>GNDLK                     | 3.86 | 1,915.02 |
| ATP | 6018 | PREDIC<br>TED:<br>similar to<br>Ras<br>GTPase-<br>activating-<br>like<br>protein<br>IQGAP1<br>(p195) | gi 1946767<br>12          | 182,771.10 | 100.00% | 9 | 9 | 10 | 0.09% | 9.00%  | IGGILAN<br>ELSVDE<br>AALHAA<br>VIAINEA<br>IDHR | 3.13 | 3,095.65 |

|     |      |                                                                               |            |            |         |   |   |    |       |       |                                           |          |
|-----|------|-------------------------------------------------------------------------------|------------|------------|---------|---|---|----|-------|-------|-------------------------------------------|----------|
| ATP | 6018 | PREDIC TED: 12<br>similar to Ras GTPase-activating-like protein IQGAP1 (p195) | gi 1946767 | 182,771.10 | 100.00% | 9 | 9 | 10 | 0.09% | 9.00% | IIGNLLY 2.89<br>YR                        | 1,124.65 |
| ATP | 6018 | PREDIC TED: 12<br>similar to Ras GTPase-activating-like protein IQGAP1 (p195) | gi 1946767 | 182,771.10 | 100.00% | 9 | 9 | 10 | 0.09% | 9.00% | ILAIGLIN 4.09<br>EALDEG<br>DAQK           | 1,883.01 |
| ATP | 6018 | PREDIC TED: 12<br>similar to Ras GTPase-activating-like protein IQGAP1 (p195) | gi 1946767 | 182,771.10 | 100.00% | 9 | 9 | 10 | 0.09% | 9.00% | ILQSPAL 2.72<br>GLR                       | 1,067.66 |
| ATP | 6018 | PREDIC TED: 12<br>similar to Ras GTPase-activating-like protein IQGAP1 (p195) | gi 1946767 | 182,771.10 | 100.00% | 9 | 9 | 10 | 0.09% | 9.00% | NVIFEISP 2.72<br>TEEVGD<br>FEVK           | 2,052.02 |
| ATP | 6018 | PREDIC TED: 12<br>similar to Ras GTPase-activating-like protein IQGAP1 (p195) | gi 1946767 | 182,771.10 | 100.00% | 9 | 9 | 10 | 0.09% | 9.00% | TLINAED 4.03<br>PPMIVV<br>R               | 1,583.85 |
| ATP | 6018 | PREDIC TED: 12<br>similar to Ras GTPase-activating-like protein IQGAP1 (p195) | gi 1946767 | 182,771.10 | 100.00% | 9 | 9 | 10 | 0.09% | 9.00% | TLQALQI 3.6<br>PAAK                       | 1,153.69 |
| ATP | 6018 | PREDIC TED: 12<br>similar to Ras GTPase-activating-like protein IQGAP1 (p195) | gi 1946767 | 182,771.10 | 100.00% | 9 | 9 | 10 | 0.09% | 9.00% | VNLLAA 5.07<br>LTNIDLA<br>LEQGSA<br>PALFK | 2,482.39 |

|     |      |                                                                                                                         |                                                   |            |         |   |   |    |       |        |                            |      |          |
|-----|------|-------------------------------------------------------------------------------------------------------------------------|---------------------------------------------------|------------|---------|---|---|----|-------|--------|----------------------------|------|----------|
| ATP | 6018 | PREDIC TED:<br>similar to<br>Ras<br>GTPase-<br>activating-<br>like<br>protein<br>IQGAP1<br>(p195)                       | gi 1946767<br>12                                  | 182,771.10 | 100.00% | 9 | 9 | 10 | 0.09% | 9.00%  | YQELIN<br>DIAR             | 2.75 | 1,234.64 |
| ATP | 6018 | RecName :<br>Full=Vesicle<br>transport<br>protein<br>GOT1B;<br>AltName:<br>Full=Golgi<br>transport<br>1<br>homolog<br>B | gi 1099397<br>23,gi 11405<br>3223,gi 825<br>71709 | 15,408.60  | 100.00% | 3 | 3 | 3  | 0.03% | 20.30% | RVPVLG<br>SLLNLPG<br>IR    | 3.36 | 1,604.00 |
| ATP | 6018 | RecName :<br>Full=Vesicle<br>transport<br>protein<br>GOT1B;<br>AltName:<br>Full=Golgi<br>transport<br>1<br>homolog<br>B | gi 1099397<br>23,gi 11405<br>3223,gi 825<br>71709 | 15,408.60  | 100.00% | 3 | 3 | 3  | 0.03% | 20.30% | SFVDKV<br>GESNNM<br>V      | 3.98 | 1,441.66 |
| ATP | 6018 | RecName :<br>Full=Vesicle<br>transport<br>protein<br>GOT1B;<br>AltName:<br>Full=Golgi<br>transport<br>1<br>homolog<br>B | gi 1099397<br>23,gi 11405<br>3223,gi 825<br>71709 | 15,408.60  | 100.00% | 3 | 3 | 3  | 0.03% | 20.30% | VPVLGS<br>LLNLPGI<br>R     | 3.96 | 1,447.90 |
| ATP | 6018 | UNC84B protein                                                                                                          | gi 1515539<br>17,gi 15612<br>1283                 | 81,429.80  | 100.00% | 4 | 4 | 4  | 0.03% | 6.04%  | IRPTAVT<br>LEHVPK          | 3.23 | 1,460.86 |
| ATP | 6018 | UNC84B protein                                                                                                          | gi 1515539<br>17,gi 15612<br>1283                 | 81,429.80  | 100.00% | 4 | 4 | 4  | 0.03% | 6.04%  | LEGQLA<br>GLR              | 2.73 | 956.5525 |
| ATP | 6018 | UNC84B protein                                                                                                          | gi 1515539<br>17,gi 15612<br>1283                 | 81,429.80  | 100.00% | 4 | 4 | 4  | 0.03% | 6.04%  | LEGQLA<br>GLRQEL<br>AALTLK | 2.96 | 1,924.12 |
| ATP | 6018 | UNC84B protein                                                                                                          | gi 1515539<br>17,gi 15612<br>1283                 | 81,429.80  | 100.00% | 4 | 4 | 4  | 0.03% | 6.04%  | SEHQQD<br>SEDLFK<br>K      | 3.83 | 1,590.74 |

|     |      |                                                           |                                                 |           |         |   |   |   |       |        |                                       |      |          |
|-----|------|-----------------------------------------------------------|-------------------------------------------------|-----------|---------|---|---|---|-------|--------|---------------------------------------|------|----------|
| ATP | 6018 | heat shock protein beta-1                                 | gi 71037405,gi 74354863,gi 85542053             | 22,375.10 | 99.80%  | 2 | 2 | 2 | 0.02% | 12.40% | LFDQAF<br>GLPR                        | 3.66 | 1,163.62 |
| ATP | 6018 | heat shock protein beta-1                                 | gi 71037405,gi 74354863,gi 85542053             | 22,375.10 | 99.80%  | 2 | 2 | 2 | 0.02% | 12.40% | QLSSGV<br>SEIQTA<br>DR                | 5.09 | 1,618.80 |
| ATP | 6018 | FBL protein                                               | gi 151553842                                    | 37,159.30 | 99.80%  | 2 | 2 | 2 | 0.02% | 9.32%  | DHAVVV<br>GVYRPP<br>PK                | 2.75 | 1,533.85 |
| ATP | 6018 | FBL protein                                               | gi 151553842                                    | 37,159.30 | 99.80%  | 2 | 2 | 2 | 0.02% | 9.32%  | LAAAILG<br>GVDQIHI<br>KPGAK           | 2.57 | 1,872.11 |
| ATP | 6018 | ribosomal protein L4                                      | gi 61553010,gi 62460480,gi 73917531,gi 74267758 | 47,395.70 | 100.00% | 3 | 4 | 4 | 0.03% | 11.40% | APIRPDI<br>VNFVHT<br>NLR              | 4.68 | 1,862.04 |
| ATP | 6018 | ribosomal protein L4                                      | gi 61553010,gi 62460480,gi 73917531,gi 74267758 | 47,395.70 | 100.00% | 3 | 4 | 4 | 0.03% | 11.40% | IEEVP<br>PLVVED<br>KVEGYK<br>K        | 2.69 | 2,313.26 |
| ATP | 6018 | ribosomal protein L4                                      | gi 61553010,gi 62460480,gi 73917531,gi 74267758 | 47,395.70 | 100.00% | 3 | 4 | 4 | 0.03% | 11.40% | NIPGITL<br>LNVSK                      | 2.09 | 1,268.76 |
| ATP | 6018 | PREDIC TED: similar to carnitine palmitoyl transferase 1C | gi 194679924                                    | 80,680.30 | 100.00% | 3 | 3 | 3 | 0.03% | 5.23%  | LPVPAV<br>QDTVNR                      | 3.24 | 1,308.73 |
| ATP | 6018 | PREDIC TED: similar to carnitine palmitoyl transferase 1C | gi 194679924                                    | 80,680.30 | 100.00% | 3 | 3 | 3 | 0.03% | 5.23%  | MTALAQ<br>DFAVNL<br>GPR               | 5.26 | 1,619.82 |
| ATP | 6018 | PREDIC TED: similar to carnitine palmitoyl transferase 1C | gi 194679924                                    | 80,680.30 | 100.00% | 3 | 3 | 3 | 0.03% | 5.23%  | YLAVDS<br>PFLK                        | 2.36 | 1,152.63 |
| ATP | 6018 | PREDIC TED: similar to UDP-glucuronate decarboxylase 1    | gi 76673441                                     | 47,730.90 | 99.80%  | 2 | 2 | 2 | 0.02% | 11.00% | NLVGSG<br>SEIQFLS<br>EAQDDP<br>QK     | 3.57 | 2,262.09 |
| ATP | 6018 | PREDIC TED: similar to UDP-glucuronate decarboxylase 1    | gi 76673441                                     | 47,730.90 | 99.80%  | 2 | 2 | 2 | 0.02% | 11.00% | VVSNFIL<br>QALQGE<br>PLTVYG<br>SGSQTR | 3.04 | 2,664.40 |

|     |      |                                                           |                                                 |            |         |   |   |   |       |       |                                            |      |          |
|-----|------|-----------------------------------------------------------|-------------------------------------------------|------------|---------|---|---|---|-------|-------|--------------------------------------------|------|----------|
| ATP | 6018 | MYO1C protein                                             | gi 146186525,gi 147906576,gi 397403,gi 90109868 | 118,133.10 | 100.00% | 6 | 6 | 6 | 0.05% | 8.27% | GAPVGG<br>HILSYLL<br>EK                    | 1.99 | 1,553.87 |
| ATP | 6018 | MYO1C protein                                             | gi 146186525,gi 147906576,gi 397403,gi 90109868 | 118,133.10 | 100.00% | 6 | 6 | 6 | 0.05% | 8.27% | LLGVEG<br>STLR                             | 2.54 | 1,044.60 |
| ATP | 6018 | MYO1C protein                                             | gi 146186525,gi 147906576,gi 397403,gi 90109868 | 118,133.10 | 100.00% | 6 | 6 | 6 | 0.05% | 8.27% | LLQSNP<br>VLEAFG<br>NAK                    | 4.51 | 1,600.87 |
| ATP | 6018 | MYO1C protein                                             | gi 146186525,gi 147906576,gi 397403,gi 90109868 | 118,133.10 | 100.00% | 6 | 6 | 6 | 0.05% | 8.27% | MSLLEL<br>VEILK                            | 3.3  | 1,303.75 |
| ATP | 6018 | MYO1C protein                                             | gi 146186525,gi 147906576,gi 397403,gi 90109868 | 118,133.10 | 100.00% | 6 | 6 | 6 | 0.05% | 8.27% | QLLLTP<br>NAVIV<br>EDAK                    | 2.62 | 1,723.00 |
| ATP | 6018 | MYO1C protein                                             | gi 146186525,gi 147906576,gi 397403,gi 90109868 | 118,133.10 | 100.00% | 6 | 6 | 6 | 0.05% | 8.27% | VLQALG<br>SEPIQYA<br>VPVVK                 | 3.34 | 1,911.10 |
| ATP | 6018 | PREDICTED: similar to Ras-interacting protein 1 isoform 2 | gi 76642189                                     | 103,383.20 | 100.00% | 3 | 4 | 4 | 0.03% | 6.85% | AASGGA<br>ALASPG<br>PGSGSG<br>TPAGSG<br>GK | 4.91 | 2,026.98 |
| ATP | 6018 | PREDICTED: similar to Ras-interacting protein 1 isoform 2 | gi 76642189                                     | 103,383.20 | 100.00% | 3 | 4 | 4 | 0.03% | 6.85% | DAVDTG<br>DIFESFS<br>SHPPLIL<br>PLGSSR     | 2.3  | 2,757.37 |
| ATP | 6018 | PREDICTED: similar to Ras-interacting protein 1 isoform 2 | gi 76642189                                     | 103,383.20 | 100.00% | 3 | 4 | 4 | 0.03% | 6.85% | LSLTGPV<br>TDDALH<br>R                     | 2.3  | 1,494.79 |



|     |      |                                                                                                         |            |            |         |   |   |    |       |        |                                    |      |          |
|-----|------|---------------------------------------------------------------------------------------------------------|------------|------------|---------|---|---|----|-------|--------|------------------------------------|------|----------|
| ATP | 6018 | RecName : Full=Aspartyl-tRNA synthetase, cytoplasmic; AltName: Full=Aspartate--tRNA ligase; Short=AspRS | gi 1102879 | 57,018.30  | 99.80%  | 2 | 2 | 2  | 0.02% | 7.58%  | EAGIEM<br>GDEEDL<br>STPNEK         | 2.25 | 1,979.84 |
| ATP | 6018 | RecName : Full=Aspartyl-tRNA synthetase, cytoplasmic; AltName: Full=Aspartate--tRNA ligase; Short=AspRS | gi 1102879 | 57,018.30  | 99.80%  | 2 | 2 | 2  | 0.02% | 7.58%  | LPLQLD<br>DAVRPE<br>VEGEEE<br>GR   | 4.1  | 2,251.12 |
| ATP | 6018 | PREDICTED: NOMO3-like protein isoform 2                                                                 | gi 1199167 | 134,079.40 | 100.00% | 5 | 5 | 5  | 0.04% | 5.81%  | EDGSFSF<br>YSLPSG<br>GYTVIPF<br>YR | 3.58 | 2,489.17 |
| ATP | 6018 | PREDICTED: NOMO3-like protein isoform 2                                                                 | gi 1199167 | 134,079.40 | 100.00% | 5 | 5 | 5  | 0.04% | 5.81%  | GQPLGP<br>AGVQVS<br>LR             | 3.59 | 1,378.78 |
| ATP | 6018 | PREDICTED: NOMO3-like protein isoform 2                                                                 | gi 1199167 | 134,079.40 | 100.00% | 5 | 5 | 5  | 0.04% | 5.81%  | ITFDVAP<br>SR                      | 3.02 | 1,005.54 |
| ATP | 6018 | PREDICTED: NOMO3-like protein isoform 2                                                                 | gi 1199167 | 134,079.40 | 100.00% | 5 | 5 | 5  | 0.04% | 5.81%  | SSIDSEP<br>ALVLGP<br>LK            | 2.8  | 1,525.85 |
| ATP | 6018 | PREDICTED: NOMO3-like protein isoform 2                                                                 | gi 1199167 | 134,079.40 | 100.00% | 5 | 5 | 5  | 0.04% | 5.81%  | VQVMVP<br>EAETR                    | 2.79 | 1,274.64 |
| ATP | 6018 | vesicle-associated membrane protein 3                                                                   | gi 1140523 | 11,517.30  | 100.00% | 4 | 8 | 10 | 0.09% | 39.40% | ADALQA<br>GASQFE<br>TSAAK          | 5.13 | 1,665.81 |

|     |      |                                                                              |                                                                 |           |         |   |   |    |       |        |                                             |      |          |
|-----|------|------------------------------------------------------------------------------|-----------------------------------------------------------------|-----------|---------|---|---|----|-------|--------|---------------------------------------------|------|----------|
| ATP | 6018 | vesicle-associate<br>d<br>membrane<br>protein<br>3                           | gi 1140523<br>42,gi 12213<br>6203,gi 868<br>22282               | 11,517.30 | 100.00% | 4 | 8 | 10 | 0.09% | 39.40% | LQQTQN<br>QVDEVV<br>DIMR                    | 4.46 | 1,931.95 |
| ATP | 6018 | vesicle-associate<br>d<br>membrane<br>protein<br>3                           | gi 1140523<br>42,gi 12213<br>6203,gi 868<br>22282               | 11,517.30 | 100.00% | 4 | 8 | 10 | 0.09% | 39.40% | LSELDD<br>RADALQ<br>AGASQF<br>ETSAAK        | 7.21 | 2,494.21 |
| ATP | 6018 | vesicle-associate<br>d<br>membrane<br>protein<br>3                           | gi 1140523<br>42,gi 12213<br>6203,gi 868<br>22282               | 11,517.30 | 100.00% | 4 | 8 | 10 | 0.09% | 39.40% | RLQQTQ<br>NQVDEV<br>VDIMR                   | 3.65 | 2,072.06 |
| ATP | 6018 | transmembrane<br>emp24<br>protein<br>transport<br>domain<br>containin<br>g 9 | gi 5985849<br>1,gi 742679<br>97,gi 77736<br>600,gi 8117<br>5032 | 27,280.40 | 100.00% | 6 | 6 | 13 | 0.11% | 33.60% | DKLSEL<br>QLR                               | 2.92 | 1,101.63 |
| ATP | 6018 | transmembrane<br>emp24<br>protein<br>transport<br>domain<br>containin<br>g 9 | gi 5985849<br>1,gi 742679<br>97,gi 77736<br>600,gi 8117<br>5032 | 27,280.40 | 100.00% | 6 | 6 | 13 | 0.11% | 33.60% | EEYQPA<br>TPGLGM<br>FVEVKD<br>PEDKVIL<br>AR | 2.38 | 3,047.54 |
| ATP | 6018 | transmembrane<br>emp24<br>protein<br>transport<br>domain<br>containin<br>g 9 | gi 5985849<br>1,gi 742679<br>97,gi 77736<br>600,gi 8117<br>5032 | 27,280.40 | 100.00% | 6 | 6 | 13 | 0.11% | 33.60% | FSLFAG<br>GMLR                              | 3.18 | 1,114.57 |
| ATP | 6018 | transmembrane<br>emp24<br>protein<br>transport<br>domain<br>containin<br>g 9 | gi 5985849<br>1,gi 742679<br>97,gi 77736<br>600,gi 8117<br>5032 | 27,280.40 | 100.00% | 6 | 6 | 13 | 0.11% | 33.60% | QLVEQV<br>EQIQK                             | 3.93 | 1,341.74 |
| ATP | 6018 | transmembrane<br>emp24<br>protein<br>transport<br>domain<br>containin<br>g 9 | gi 5985849<br>1,gi 742679<br>97,gi 77736<br>600,gi 8117<br>5032 | 27,280.40 | 100.00% | 6 | 6 | 13 | 0.11% | 33.60% | QREEYQ<br>PATPGL<br>GMFVEV<br>KDPEDK        | 4.56 | 2,779.32 |
| ATP | 6018 | transmembrane<br>emp24<br>protein<br>transport<br>domain<br>containin<br>g 9 | gi 5985849<br>1,gi 742679<br>97,gi 77736<br>600,gi 8117<br>5032 | 27,280.40 | 100.00% | 6 | 6 | 13 | 0.11% | 33.60% | VHLDIQ<br>VGEHAN<br>DYAEIA<br>AK            | 3.56 | 2,193.09 |

|     |      |                                         |                                   |           |         |    |    |    |       |        |                                                     |          |
|-----|------|-----------------------------------------|-----------------------------------|-----------|---------|----|----|----|-------|--------|-----------------------------------------------------|----------|
| ATP | 6018 | RAB1A, member 48<br>RAS oncogene family | gi 1204194                        | 22,660.40 | 100.00% | 5  | 7  | 13 | 0.11% | 36.10% | EFADSL 3.74<br>GIPFLET<br>SAK                       | 1,724.87 |
| ATP | 6018 | RAB1A, member 48<br>RAS oncogene family | gi 1204194                        | 22,660.40 | 100.00% | 5  | 7  | 13 | 0.11% | 36.10% | GAHGIIV 2.77<br>VYDVTD<br>QESFNN<br>VK              | 2,305.15 |
| ATP | 6018 | RAB1A, member 48<br>RAS oncogene family | gi 1204194                        | 22,660.40 | 100.00% | 5  | 7  | 13 | 0.11% | 36.10% | KVVDYT 3.81<br>TAKEFA<br>DSLGIPI<br>LETSAK          | 2,730.42 |
| ATP | 6018 | RAB1A, member 48<br>RAS oncogene family | gi 1204194                        | 22,660.40 | 100.00% | 5  | 7  | 13 | 0.11% | 36.10% | LLLIGDS 3.07<br>GVGK                                | 1,071.64 |
| ATP | 6018 | RAB1A, member 48<br>RAS oncogene family | gi 1204194                        | 22,660.40 | 100.00% | 5  | 7  | 13 | 0.11% | 36.10% | NATNVE 3.67<br>QSFMTM<br>AAEIK                      | 1,900.88 |
| ATP | 6018 | LMNB1 protein                           | gi 1544256<br>05,gi 15707<br>4106 | 66,404.60 | 100.00% | 12 | 19 | 32 | 0.27% | 31.40% | ALYETE 2.82<br>LADAR                                | 1,251.62 |
| ATP | 6018 | LMNB1 protein                           | gi 1544256<br>05,gi 15707<br>4106 | 66,404.60 | 100.00% | 12 | 19 | 32 | 0.27% | 31.40% | DQMQQ 4<br>QLNDYE<br>QLLDVK                         | 2,123.99 |
| ATP | 6018 | LMNB1 protein                           | gi 1544256<br>05,gi 15707<br>4106 | 66,404.60 | 100.00% | 12 | 19 | 32 | 0.27% | 31.40% | IQELEDL 3.38<br>LAK                                 | 1,171.66 |
| ATP | 6018 | LMNB1 protein                           | gi 1544256<br>05,gi 15707<br>4106 | 66,404.60 | 100.00% | 12 | 19 | 32 | 0.27% | 31.40% | LALDME 2.29<br>ISAYR                                | 1,297.65 |
| ATP | 6018 | LMNB1 protein                           | gi 1544256<br>05,gi 15707<br>4106 | 66,404.60 | 100.00% | 12 | 19 | 32 | 0.27% | 31.40% | LAQALH 2.67<br>EMREQH<br>DAQVK                      | 2,020.00 |
| ATP | 6018 | LMNB1 protein                           | gi 1544256<br>05,gi 15707<br>4106 | 66,404.60 | 100.00% | 12 | 19 | 32 | 0.27% | 31.40% | LREYEA 3.24<br>ALNSK                                | 1,293.68 |
| ATP | 6018 | LMNB1 protein                           | gi 1544256<br>05,gi 15707<br>4106 | 66,404.60 | 100.00% | 12 | 19 | 32 | 0.27% | 31.40% | LSSEMNI 4.24<br>TSTVNS<br>AR                        | 1,496.70 |
| ATP | 6018 | LMNB1 protein                           | gi 1544256<br>05,gi 15707<br>4106 | 66,404.60 | 100.00% | 12 | 19 | 32 | 0.27% | 31.40% | LYKEEL 2.94<br>EQTYHA<br>K                          | 1,651.83 |
| ATP | 6018 | LMNB1 protein                           | gi 1544256<br>05,gi 15707<br>4106 | 66,404.60 | 100.00% | 12 | 19 | 32 | 0.27% | 31.40% | MRIESLS 4.14<br>SQLSNL<br>QK                        | 1,749.92 |
| ATP | 6018 | LMNB1 protein                           | gi 1544256<br>05,gi 15707<br>4106 | 66,404.60 | 100.00% | 12 | 19 | 32 | 0.27% | 31.40% | NMYEEE 3.64<br>INETR                                | 1,443.61 |
| ATP | 6018 | LMNB1 protein                           | gi 1544256<br>05,gi 15707<br>4106 | 66,404.60 | 100.00% | 12 | 19 | 32 | 0.27% | 31.40% | SLESdle 5.78<br>DLKDQI<br>AQLEAS<br>LAAAK           | 2,558.32 |
| ATP | 6018 | LMNB1 protein                           | gi 1544256<br>05,gi 15707<br>4106 | 66,404.60 | 100.00% | 12 | 19 | 32 | 0.27% | 31.40% | TTIPEEE 5.28<br>EEEEEA<br>AEVAVE<br>EELFHQ<br>QGAPR | 3,425.55 |

|     |      |                                                              |                                                                                                                                                           |           |         |   |   |   |       |        |                                     |      |          |
|-----|------|--------------------------------------------------------------|-----------------------------------------------------------------------------------------------------------------------------------------------------------|-----------|---------|---|---|---|-------|--------|-------------------------------------|------|----------|
| ATP | 6018 | RecName<br>:<br>Full=40S<br>ribosomal<br>protein<br>S20      | gi 1088609<br>55,gi 61822<br>677,gi 7358<br>7131,gi 777<br>35823                                                                                          | 13,395.10 | 100.00% | 3 | 4 | 4 | 0.03% | 22.70% | DTGKTP<br>VEPEVAI<br>HR             | 4.22 | 1,648.87 |
| ATP | 6018 | RecName<br>:<br>Full=40S<br>ribosomal<br>protein<br>S20      | gi 1088609<br>55,gi 61822<br>677,gi 7358<br>7131,gi 777<br>35823                                                                                          | 13,395.10 | 100.00% | 3 | 4 | 4 | 0.03% | 22.70% | LIDLHSP<br>SEIVK                    | 2.21 | 1,350.76 |
| ATP | 6018 | RecName<br>:<br>Full=40S<br>ribosomal<br>protein<br>S20      | gi 1088609<br>55,gi 61822<br>677,gi 7358<br>7131,gi 777<br>35823                                                                                          | 13,395.10 | 100.00% | 3 | 4 | 4 | 0.03% | 22.70% | TPVEPE<br>VAIHR                     | 4.15 | 1,247.67 |
| ATP | 6018 | SACM1L<br>protein                                            | gi 1515543<br>72,gi 15612<br>0909,gi 167<br>016544                                                                                                        | 67,077.30 | 99.80%  | 2 | 2 | 2 | 0.02% | 4.43%  | LSNTSPE<br>FQEMSL<br>LER            | 3.38 | 1,896.90 |
| ATP | 6018 | SACM1L<br>protein                                            | gi 1515543<br>72,gi 15612<br>0909,gi 167<br>016544                                                                                                        | 67,077.30 | 99.80%  | 2 | 2 | 2 | 0.02% | 4.43%  | TNVIQSL<br>LAR                      | 2.92 | 1,114.66 |
| ATP | 6018 | Interleuki<br>n<br>enhancer<br>binding<br>factor 2,<br>45kDa | gi 8340544<br>2,gi 840003<br>47                                                                                                                           | 43,068.60 | 100.00% | 3 | 4 | 4 | 0.03% | 14.60% | ILPTLEA<br>VAALGN<br>K              | 3.35 | 1,409.84 |
| ATP | 6018 | Interleuki<br>n<br>enhancer<br>binding<br>factor 2,<br>45kDa | gi 8340544<br>2,gi 840003<br>47                                                                                                                           | 43,068.60 | 100.00% | 3 | 4 | 4 | 0.03% | 14.60% | INNVIDN<br>LIVAPGT<br>FEVQIEE<br>VR | 3.51 | 2,582.38 |
| ATP | 6018 | Interleuki<br>n<br>enhancer<br>binding<br>factor 2,<br>45kDa | gi 8340544<br>2,gi 840003<br>47                                                                                                                           | 43,068.60 | 100.00% | 3 | 4 | 4 | 0.03% | 14.60% | NQDLAP<br>NSAEQA<br>SILSLVT<br>K    | 3.92 | 2,099.10 |
| ATP | 6018 | CALM3<br>protein                                             | gi 1113085<br>39,gi 11405<br>3089,gi 115<br>305083,gi 1<br>57831834,g<br>i 15787966<br>9,gi 194671<br>098,gi 2818<br>9857,gi 490<br>37473,gi 86<br>822265 | 19,973.60 | 99.80%  | 2 | 4 | 4 | 0.03% | 18.10% | EAFSLFD<br>KDG DGT<br>ITTK          | 4.41 | 1,844.89 |
| ATP | 6018 | CALM3<br>protein                                             | gi 1113085<br>39,gi 11405<br>3089,gi 115<br>305083,gi 1<br>57831834,g<br>i 15787966<br>9,gi 194671<br>098,gi 2818<br>9857,gi 490<br>37473,gi 86<br>822265 | 19,973.60 | 99.80%  | 2 | 4 | 4 | 0.03% | 18.10% | VFDKDG<br>NGYISA<br>AELR            | 5.02 | 1,754.87 |

|     |      |                                                                                                                                                                                                                                                                                                   |                                                         |           |        |   |   |   |       |        |                                     |      |          |
|-----|------|---------------------------------------------------------------------------------------------------------------------------------------------------------------------------------------------------------------------------------------------------------------------------------------------------|---------------------------------------------------------|-----------|--------|---|---|---|-------|--------|-------------------------------------|------|----------|
| ATP | 6018 | RecName<br>:<br>Full=Cyt<br>ochrome<br>c oxidase<br>polypepti<br>de 7A2,<br>mitochon<br>drial;<br>AltName:<br>Full=Cyt<br>ochrome<br>c oxidase<br>polypepti<br>de VIIa-<br>liver/hear<br>t;<br>Short=Cy<br>tochrome<br>c oxidase<br>subunit<br>VIIa-L;<br>Short=VI<br>IIC;<br>Flags:<br>Precursor | gi 117120.g<br>i 28461241,<br>gi 488158.g<br>i 74354141 | 9,305.40  | 99.80% | 2 | 2 | 2 | 0.02% | 27.70% | GGIADA<br>LLYR                      | 3.26 | 1,048.58 |
| ATP | 6018 | RecName<br>:<br>Full=Cyt<br>ochrome<br>c oxidase<br>polypepti<br>de 7A2,<br>mitochon<br>drial;<br>AltName:<br>Full=Cyt<br>ochrome<br>c oxidase<br>polypepti<br>de VIIa-<br>liver/hear<br>t;<br>Short=Cy<br>tochrome<br>c oxidase<br>subunit<br>VIIa-L;<br>Short=VI<br>IIC;<br>Flags:<br>Precursor | gi 117120.g<br>i 28461241,<br>gi 488158.g<br>i 74354141 | 9,305.40  | 99.80% | 2 | 2 | 2 | 0.02% | 27.70% | LFQEDN<br>GIPVHLK                   | 3.72 | 1,509.81 |
| ATP | 6018 | SLC25A<br>24<br>protein                                                                                                                                                                                                                                                                           | gi 1487454<br>86,gi 14964<br>2721,gi 167<br>016553      | 53,268.40 | 99.80% | 2 | 3 | 6 | 0.05% | 8.39%  | GYVPNL<br>LGIPYA<br>GIDLAV<br>YELLK | 5.69 | 2,604.47 |
| ATP | 6018 | SLC25A<br>24<br>protein                                                                                                                                                                                                                                                                           | gi 1487454<br>86,gi 14964<br>2721,gi 167<br>016553      | 53,268.40 | 99.80% | 2 | 3 | 6 | 0.05% | 8.39%  | VLPVGI<br>SYVVYE<br>NMK             | 2.68 | 1,797.95 |

|     |      |                                                                                                                |                                                                   |           |         |   |   |   |       |        |                                      |      |          |
|-----|------|----------------------------------------------------------------------------------------------------------------|-------------------------------------------------------------------|-----------|---------|---|---|---|-------|--------|--------------------------------------|------|----------|
| ATP | 6018 | RecName<br>:<br>Full=NA<br>DPH--<br>cytochro<br>me P450<br>reductase<br>;<br>Short=CP<br>R;<br>Short=P4<br>50R | gi 1102876<br>86,gi 14623<br>1834,gi 742<br>68199,gi 78<br>369374 | 77,249.90 | 100.00% | 6 | 8 | 8 | 0.07% | 15.10% | ATTPVI<br>MVGPGT<br>GVAPFIG<br>FIQER | 4.27 | 2,474.31 |
| ATP | 6018 | RecName<br>:<br>Full=NA<br>DPH--<br>cytochro<br>me P450<br>reductase<br>;<br>Short=CP<br>R;<br>Short=P4<br>50R | gi 1102876<br>86,gi 14623<br>1834,gi 742<br>68199,gi 78<br>369374 | 77,249.90 | 100.00% | 6 | 8 | 8 | 0.07% | 15.10% | GMAADP<br>EEYDLA<br>DLSSLPE<br>IEK   | 5.14 | 2,409.10 |
| ATP | 6018 | RecName<br>:<br>Full=NA<br>DPH--<br>cytochro<br>me P450<br>reductase<br>;<br>Short=CP<br>R;<br>Short=P4<br>50R | gi 1102876<br>86,gi 14623<br>1834,gi 742<br>68199,gi 78<br>369374 | 77,249.90 | 100.00% | 6 | 8 | 8 | 0.07% | 15.10% | NIIVFYG<br>SQTGTA<br>EEFANR          | 3.16 | 2,117.03 |
| ATP | 6018 | RecName<br>:<br>Full=NA<br>DPH--<br>cytochro<br>me P450<br>reductase<br>;<br>Short=CP<br>R;<br>Short=P4<br>50R | gi 1102876<br>86,gi 14623<br>1834,gi 742<br>68199,gi 78<br>369374 | 77,249.90 | 100.00% | 6 | 8 | 8 | 0.07% | 15.10% | RSDEDY<br>LYREEL<br>AGFHK            | 3.39 | 2,128.01 |
| ATP | 6018 | RecName<br>:<br>Full=NA<br>DPH--<br>cytochro<br>me P450<br>reductase<br>;<br>Short=CP<br>R;<br>Short=P4<br>50R | gi 1102876<br>86,gi 14623<br>1834,gi 742<br>68199,gi 78<br>369374 | 77,249.90 | 100.00% | 6 | 8 | 8 | 0.07% | 15.10% | SYENQK<br>PPFDAK                     | 3.58 | 1,423.69 |

|     |      |                                                                                                                |                                                                                                                                  |            |         |   |   |   |       |        |                                                    |          |
|-----|------|----------------------------------------------------------------------------------------------------------------|----------------------------------------------------------------------------------------------------------------------------------|------------|---------|---|---|---|-------|--------|----------------------------------------------------|----------|
| ATP | 6018 | RecName<br>:<br>Full=NA<br>DPH--<br>cytochro<br>me P450<br>reductase<br>;<br>Short=CP<br>R;<br>Short=P4<br>50R | gi 1102876<br>86,gi 14623<br>1834,gi 742<br>68199,gi 78<br>369374                                                                | 77,249.90  | 100.00% | 6 | 8 | 8 | 0.07% | 15.10% | YAVFAL 2.85<br>GNK                                 | 982.5356 |
| ATP | 6018 | TXNDC1<br>0 protein                                                                                            | gi 1515540<br>48,gi 15612<br>1223                                                                                                | 51,713.50  | 100.00% | 3 | 4 | 5 | 0.04% | 10.40% | FQNYLT 4.44<br>MDGFLL<br>YELGDT<br>GK              | 2,341.11 |
| ATP | 6018 | TXNDC1<br>0 protein                                                                                            | gi 1515540<br>48,gi 15612<br>1223                                                                                                | 51,713.50  | 100.00% | 3 | 4 | 5 | 0.04% | 10.40% | MDATSY 3.48<br>SSIASEF<br>GVR                      | 1,736.78 |
| ATP | 6018 | TXNDC1<br>0 protein                                                                                            | gi 1515540<br>48,gi 15612<br>1223                                                                                                | 51,713.50  | 100.00% | 3 | 4 | 5 | 0.04% | 10.40% | TKDDIII 3.74<br>FAHR                               | 1,344.69 |
| ATP | 6018 | MTCH1<br>protein                                                                                               | gi 1544261<br>80,gi 15707<br>4126                                                                                                | 41,499.70  | 100.00% | 3 | 3 | 4 | 0.03% | 11.30% | LLIQVGH 2.72<br>EPMPPTI<br>GTNVLG<br>R             | 2,258.23 |
| ATP | 6018 | MTCH1<br>protein                                                                                               | gi 1544261<br>80,gi 15707<br>4126                                                                                                | 41,499.70  | 100.00% | 3 | 3 | 4 | 0.03% | 11.30% | LMSNAL 3.24<br>STVTR                               | 1,208.63 |
| ATP | 6018 | MTCH1<br>protein                                                                                               | gi 1544261<br>80,gi 15707<br>4126                                                                                                | 41,499.70  | 100.00% | 3 | 3 | 4 | 0.03% | 11.30% | VLYLPSF 3.21<br>FTYAK                              | 1,448.78 |
| ATP | 6018 | collagen,<br>type II,<br>alpha 1<br>isoform 2                                                                  | gi 1644144<br>27                                                                                                                 | 134,410.60 | 99.80%  | 2 | 2 | 2 | 0.02% | 3.53%  | GANGEP 2.58<br>GKAGEK<br>GLPGAP<br>GLR             | 1,933.03 |
| ATP | 6018 | collagen,<br>type II,<br>alpha 1<br>isoform 2                                                                  | gi 1644144<br>27                                                                                                                 | 134,410.60 | 99.80%  | 2 | 2 | 2 | 0.02% | 3.53%  | MIRLGA 2.77<br>PQTLVL<br>LTLIVA<br>AVLRCH<br>GQDVR | 3,172.82 |
| ATP | 6018 | RecName<br>:<br>Full=Hist<br>one<br>H2A.V;<br>AltName:<br>Full=H2<br>A.F/Z                                     | gi 1099400<br>32,gi 16315<br>0,gi 278073<br>73,gi 410,gi<br> 81674301,<br>gi 8167475<br>5,gi 832884<br>07,gi 84000<br>371        | 13,535.20  | 99.80%  | 2 | 5 | 5 | 0.04% | 33.60% | ATIAGG 4.61<br>GVIPHIH<br>K                        | 1,370.79 |
| ATP | 6018 | RecName<br>:<br>Full=Hist<br>one<br>H2A.V;<br>AltName:<br>Full=H2<br>A.F/Z                                     | gi 1099400<br>32,gi 16315<br>0,gi 278073<br>73,gi 410,gi<br> 81674301,<br>gi 8167475<br>5,gi 832884<br>07,gi 84000<br>371        | 13,535.20  | 99.80%  | 2 | 5 | 5 | 0.04% | 33.60% | VGATAA 3.93<br>VYSAAIL<br>EYLTAE<br>VLELAG<br>NASK | 2,895.54 |
| ATP | 6018 | CD14<br>protein                                                                                                | gi 1515556<br>47,gi 15770<br>3512,gi 157<br>703514,gi 1<br>57703516,g<br>i 2274810,g<br>i 3913217,g<br>i 41386760,<br>gi 4887170 | 39,649.70  | 99.80%  | 2 | 2 | 2 | 0.02% | 8.04%  | LGAAQV 4.11<br>PAQLLV<br>AVLR                      | 1,619.00 |

|     |      |                               |                                                                                                |            |         |    |    |    |       |        |                                             |      |          |
|-----|------|-------------------------------|------------------------------------------------------------------------------------------------|------------|---------|----|----|----|-------|--------|---------------------------------------------|------|----------|
| ATP | 6018 | CD14 protein                  | gi 151555647,gi 157703512,gi 1703514,gi 157703516,gi 2274810,gi 3913217,gi 41386760,gi 4887170 | 39,649.70  | 99.80%  | 2  | 2  | 2  | 0.02% | 8.04%  | VQPQSL<br>DLSHNS<br>LR                      | 2.72 | 1,593.83 |
| ATP | 6018 | PREDICTED: vinculin isoform 1 | gi 194679457,gi 194679459                                                                      | 123,848.10 | 99.90%  | 2  | 2  | 2  | 0.02% | 3.79%  | AIPDLTA<br>PVAAVQ<br>AAVSNL<br>VR           | 2.65 | 2,076.18 |
| ATP | 6018 | PREDICTED: vinculin isoform 1 | gi 194679457,gi 194679459                                                                      | 123,848.10 | 99.90%  | 2  | 2  | 2  | 0.02% | 3.79%  | LLAVAA<br>TAPPDA<br>PNREEV<br>FDER          | 2.97 | 2,381.21 |
| ATP | 6018 | non-muscle myosin heavy chain | gi 3205211                                                                                     | 72,354.70  | 100.00% | 15 | 18 | 26 | 0.22% | 33.40% | ALEEAM<br>EQKAEL<br>ER                      | 2.77 | 1,662.80 |
| ATP | 6018 | non-muscle myosin heavy chain | gi 3205211                                                                                     | 72,354.70  | 100.00% | 15 | 18 | 26 | 0.22% | 33.40% | ALEQQV<br>EEMKTQ<br>LEELEDE<br>LQATED<br>AK | 4.87 | 3,163.48 |
| ATP | 6018 | non-muscle myosin heavy chain | gi 3205211                                                                                     | 72,354.70  | 100.00% | 15 | 18 | 26 | 0.22% | 33.40% | ANLQID<br>QLNTDL<br>NLER                    | 5    | 1,869.97 |
| ATP | 6018 | non-muscle myosin heavy chain | gi 3205211                                                                                     | 72,354.70  | 100.00% | 15 | 18 | 26 | 0.22% | 33.40% | ELEDAT<br>ETADAM<br>NR                      | 3.34 | 1,581.67 |
| ATP | 6018 | non-muscle myosin heavy chain | gi 3205211                                                                                     | 72,354.70  | 100.00% | 15 | 18 | 26 | 0.22% | 33.40% | IAQLEEE<br>LEEEQG<br>NTELVN<br>DR           | 4.97 | 2,458.16 |
| ATP | 6018 | non-muscle myosin heavy chain | gi 3205211                                                                                     | 72,354.70  | 100.00% | 15 | 18 | 26 | 0.22% | 33.40% | IAQLEEE<br>LEEEQG<br>NTELVN<br>DRLK         | 4.37 | 2,699.34 |
| ATP | 6018 | non-muscle myosin heavy chain | gi 3205211                                                                                     | 72,354.70  | 100.00% | 15 | 18 | 26 | 0.22% | 33.40% | IAQLEEQ<br>LDNETK<br>ER                     | 3.64 | 1,815.91 |
| ATP | 6018 | non-muscle myosin heavy chain | gi 3205211                                                                                     | 72,354.70  | 100.00% | 15 | 18 | 26 | 0.22% | 33.40% | KANLQI<br>DQLNTD<br>LNLER                   | 2.59 | 1,998.06 |
| ATP | 6018 | non-muscle myosin heavy chain | gi 3205211                                                                                     | 72,354.70  | 100.00% | 15 | 18 | 26 | 0.22% | 33.40% | KFDQLL<br>AEEK                              | 3.02 | 1,220.65 |
| ATP | 6018 | non-muscle myosin heavy chain | gi 3205211                                                                                     | 72,354.70  | 100.00% | 15 | 18 | 26 | 0.22% | 33.40% | LKDVLL<br>QVDDER<br>R                       | 2.26 | 1,598.89 |



|     |      |                               |                                   |           |         |    |    |    |       |        |                                           |      |          |
|-----|------|-------------------------------|-----------------------------------|-----------|---------|----|----|----|-------|--------|-------------------------------------------|------|----------|
| ATP | 6018 | non-muscle myosin heavy chain | gi 3205211                        | 72,354.70 | 100.00% | 15 | 18 | 26 | 0.22% | 33.40% | LQQELD<br>DLLVDL<br>DHQR                  | 2.36 | 1,949.99 |
| ATP | 6018 | non-muscle myosin heavy chain | gi 3205211                        | 72,354.70 | 100.00% | 15 | 18 | 26 | 0.22% | 33.40% | NAEQYK<br>DQADKA<br>STR                   | 4.44 | 1,724.82 |
| ATP | 6018 | non-muscle myosin heavy chain | gi 3205211                        | 72,354.70 | 100.00% | 15 | 18 | 26 | 0.22% | 33.40% | QAQQR<br>DELADEI<br>ANSSGK                | 4.07 | 2,088.98 |
| ATP | 6018 | non-muscle myosin heavy chain | gi 3205211                        | 72,354.70 | 100.00% | 15 | 18 | 26 | 0.22% | 33.40% | QISTLHA<br>QVTDNR<br>K                    | 2.58 | 1,643.85 |
| ATP | 6018 | non-muscle myosin heavy chain | gi 3205211                        | 72,354.70 | 100.00% | 15 | 18 | 26 | 0.22% | 33.40% | RQLEEA<br>EEEEQR                          | 3.69 | 1,487.71 |
| ATP | 6018 | RPN1 protein                  | gi 1267173<br>91.gi 12927<br>7520 | 68,335.00 | 100.00% | 15 | 22 | 38 | 0.33% | 38.10% | AASFLL<br>ALEPELE<br>AR                   | 4.47 | 1,629.88 |
| ATP | 6018 | RPN1 protein                  | gi 1267173<br>91.gi 12927<br>7520 | 68,335.00 | 100.00% | 15 | 22 | 38 | 0.33% | 38.10% | ENLVEQ<br>HIQDIVV<br>HYTFNK               | 3.97 | 2,326.18 |
| ATP | 6018 | RPN1 protein                  | gi 1267173<br>91.gi 12927<br>7520 | 68,335.00 | 100.00% | 15 | 22 | 38 | 0.33% | 38.10% | IDHILDA<br>L                              | 2.47 | 909.5042 |
| ATP | 6018 | RPN1 protein                  | gi 1267173<br>91.gi 12927<br>7520 | 68,335.00 | 100.00% | 15 | 22 | 38 | 0.33% | 38.10% | ISVIVEA<br>VYTHVL<br>QPYPYQI<br>TQSEK     | 3.61 | 2,843.52 |
| ATP | 6018 | RPN1 protein                  | gi 1267173<br>91.gi 12927<br>7520 | 68,335.00 | 100.00% | 15 | 22 | 38 | 0.33% | 38.10% | LPVALD<br>PGAK                            | 2.13 | 980.5777 |
| ATP | 6018 | RPN1 protein                  | gi 1267173<br>91.gi 12927<br>7520 | 68,335.00 | 100.00% | 15 | 22 | 38 | 0.33% | 38.10% | LVDHVF<br>DEQVIDS<br>LTVK                 | 5.45 | 1,957.03 |
| ATP | 6018 | RPN1 protein                  | gi 1267173<br>91.gi 12927<br>7520 | 68,335.00 | 100.00% | 15 | 22 | 38 | 0.33% | 38.10% | NIQVDSP<br>YEISR                          | 3.8  | 1,420.71 |
| ATP | 6018 | RPN1 protein                  | gi 1267173<br>91.gi 12927<br>7520 | 68,335.00 | 100.00% | 15 | 22 | 38 | 0.33% | 38.10% | QFVVFE<br>GNHYFY<br>SPYPTK                | 3.55 | 2,223.05 |
| ATP | 6018 | RPN1 protein                  | gi 1267173<br>91.gi 12927<br>7520 | 68,335.00 | 100.00% | 15 | 22 | 38 | 0.33% | 38.10% | SEDLLD<br>YGPFR                           | 4.11 | 1,311.62 |
| ATP | 6018 | RPN1 protein                  | gi 1267173<br>91.gi 12927<br>7520 | 68,335.00 | 100.00% | 15 | 22 | 38 | 0.33% | 38.10% | THYIVG<br>YNLPSY<br>EYLYNL<br>GDQYAL<br>K | 3.55 | 2,997.47 |
| ATP | 6018 | RPN1 protein                  | gi 1267173<br>91.gi 12927<br>7520 | 68,335.00 | 100.00% | 15 | 22 | 38 | 0.33% | 38.10% | TILPAAA<br>QDVYYR                         | 2.77 | 1,480.78 |
| ATP | 6018 | RPN1 protein                  | gi 1267173<br>91.gi 12927<br>7520 | 68,335.00 | 100.00% | 15 | 22 | 38 | 0.33% | 38.10% | TVDLSS<br>HLAK                            | 3.2  | 1,070.58 |
| ATP | 6018 | RPN1 protein                  | gi 1267173<br>91.gi 12927<br>7520 | 68,335.00 | 100.00% | 15 | 22 | 38 | 0.33% | 38.10% | VHSENN<br>SPFLTIT<br>SMTR                 | 5.12 | 1,949.94 |

|     |      |                                                                      |                                                             |           |         |    |    |    |       |        |                                                     |          |
|-----|------|----------------------------------------------------------------------|-------------------------------------------------------------|-----------|---------|----|----|----|-------|--------|-----------------------------------------------------|----------|
| ATP | 6018 | RPN1 protein                                                         | gi 126717391.gi 129277520                                   | 68,335.00 | 100.00% | 15 | 22 | 38 | 0.33% | 38.10% | VTAEVV 6.37<br>LAHAGS<br>GSSPR                      | 1,637.86 |
| ATP | 6018 | RPN1 protein                                                         | gi 126717391.gi 129277520                                   | 68,335.00 | 100.00% | 15 | 22 | 38 | 0.33% | 38.10% | YDYQRQ 4<br>PDSGVS<br>SVR                           | 1,756.82 |
| ATP | 6018 | acyl-Coenzym e A dehydrog enase, very long chain isoform 1 precursor | gi 146231822.gi 160332360.gi 27806205.gi 74267810.gi 930358 | 70,632.20 | 99.80%  | 2  | 2  | 2  | 0.02% | 5.95%  | GQLTTD 2.96<br>QVFPYP<br>SVLNED<br>QTQFLK           | 2,768.38 |
| ATP | 6018 | acyl-Coenzym e A dehydrog enase, very long chain isoform 1 precursor | gi 146231822.gi 160332360.gi 27806205.gi 74267810.gi 930358 | 70,632.20 | 99.80%  | 2  | 2  | 2  | 0.02% | 5.95%  | VPAENV 4.09<br>LGEVGG<br>GFK                        | 1,472.77 |
| ATP | 6018 | RecName : Full=60S ribosomal protein L8                              | gi 108860941.gi 154426156.gi 74267654.gi 77736197           | 28,006.80 | 100.00% | 3  | 3  | 3  | 0.03% | 18.30% | AQLNIG 3.66<br>NVLPVG<br>TMPEGTI<br>VCCLEE<br>KPGDR | 3,169.57 |
| ATP | 6018 | RecName : Full=60S ribosomal protein L8                              | gi 108860941.gi 154426156.gi 74267654.gi 77736197           | 28,006.80 | 100.00% | 3  | 3  | 3  | 0.03% | 18.30% | ASGNYA 4.34<br>TVISHNP<br>ETK                       | 1,688.82 |
| ATP | 6018 | RecName : Full=60S ribosomal protein L8                              | gi 108860941.gi 154426156.gi 74267654.gi 77736197           | 28,006.80 | 100.00% | 3  | 3  | 3  | 0.03% | 18.30% | ASGNYA 2.45<br>TVISHNP<br>ETKK                      | 1,816.92 |
| ATP | 6018 | Karyopherin alpha 2 (RAG cohort 1, importin alpha 1)                 | gi 74354742.gi 77735853                                     | 57,908.80 | 100.00% | 5  | 5  | 5  | 0.04% | 17.40% | GINSNNL 3.1<br>ESQLQA<br>TQAAR                      | 1,914.96 |
| ATP | 6018 | Karyopherin alpha 2 (RAG cohort 1, importin alpha 1)                 | gi 74354742.gi 77735853                                     | 57,908.80 | 100.00% | 5  | 5  | 5  | 0.04% | 17.40% | LLGATE 3<br>LPIVTPA<br>LR                           | 1,563.95 |
| ATP | 6018 | Karyopherin alpha 2 (RAG cohort 1, importin alpha 1)                 | gi 74354742.gi 77735853                                     | 57,908.80 | 100.00% | 5  | 5  | 5  | 0.04% | 17.40% | NKNPAP 3<br>PLEAIEQ<br>ILPTLVR                      | 2,213.27 |

|     |      |                                                                     |                           |            |         |   |   |   |       |        |                                    |      |          |
|-----|------|---------------------------------------------------------------------|---------------------------|------------|---------|---|---|---|-------|--------|------------------------------------|------|----------|
| ATP | 6018 | Karyopherin alpha 2 (RAG 53 cohort 1, importin alpha 1)             | gi 7435474.2,gi 77735853  | 57,908.80  | 100.00% | 5 | 5 | 5 | 0.04% | 17.40% | NVSSFP<br>DDATSP<br>LQENR          | 3.75 | 1,876.87 |
| ATP | 6018 | Karyopherin alpha 2 (RAG 53 cohort 1, importin alpha 1)             | gi 7435474.2,gi 77735853  | 57,908.80  | 100.00% | 5 | 5 | 5 | 0.04% | 17.40% | QDQIQQ<br>VVNHGL<br>VPFLVG<br>LLSK | 4.24 | 2,432.37 |
| ATP | 6018 | Family with sequence similarity 62 (C2 domain containing), member A | gi 117306190,gi 118150984 | 123,012.90 | 100.00% | 5 | 6 | 7 | 0.06% | 7.41%  | ALTLGA<br>LTLPLAR                  | 3.11 | 1,309.82 |
| ATP | 6018 | Family with sequence similarity 62 (C2 domain containing), member A | gi 117306190,gi 118150984 | 123,012.90 | 100.00% | 5 | 6 | 7 | 0.06% | 7.41%  | GEGSGT<br>LGSLSLP<br>LSELLVA<br>DR | 4.11 | 2,171.16 |
| ATP | 6018 | Family with sequence similarity 62 (C2 domain containing), member A | gi 117306190,gi 118150984 | 123,012.90 | 100.00% | 5 | 6 | 7 | 0.06% | 7.41%  | LHVLEA<br>QDLIAK                   | 3.94 | 1,349.78 |
| ATP | 6018 | Family with sequence similarity 62 (C2 domain containing), member A | gi 117306190,gi 118150984 | 123,012.90 | 100.00% | 5 | 6 | 7 | 0.06% | 7.41%  | LLVPLVP<br>DLQDVA<br>QLR           | 3.51 | 1,789.06 |
| ATP | 6018 | Family with sequence similarity 62 (C2 domain containing), member A | gi 117306190,gi 118150984 | 123,012.90 | 100.00% | 5 | 6 | 7 | 0.06% | 7.41%  | LTHSDSP<br>PEAPAG<br>PLGQVK        | 3.74 | 1,900.98 |
| ATP | 6018 | GANAB protein                                                       | gi 151553519,gi 194679898 | 109,455.80 | 100.00% | 7 | 8 | 9 | 0.08% | 11.20% | LKVTEG<br>GEPYR                    | 2.75 | 1,248.66 |
| ATP | 6018 | GANAB protein                                                       | gi 151553519,gi 194679898 | 109,455.80 | 100.00% | 7 | 8 | 9 | 0.08% | 11.20% | LSFQHD<br>PETSVDI<br>LR            | 3.32 | 1,754.94 |

|     |      |                                                                                                                 |                                        |            |         |   |   |   |       |        |                                        |          |
|-----|------|-----------------------------------------------------------------------------------------------------------------|----------------------------------------|------------|---------|---|---|---|-------|--------|----------------------------------------|----------|
| ATP | 6018 | GANAB protein                                                                                                   | gi 151553519,gi 194679898              | 109,455.80 | 100.00% | 7 | 8 | 9 | 0.08% | 11.20% | LVAIVDP 2.1<br>HIK                     | 1,104.68 |
| ATP | 6018 | GANAB protein                                                                                                   | gi 151553519,gi 194679898              | 109,455.80 | 100.00% | 7 | 8 | 9 | 0.08% | 11.20% | MALYGS 2.87<br>VPVLLA<br>HSPLR         | 1,840.02 |
| ATP | 6018 | GANAB protein                                                                                                   | gi 151553519,gi 194679898              | 109,455.80 | 100.00% | 7 | 8 | 9 | 0.08% | 11.20% | MLDYLQ 4.3<br>GSGETP<br>QTDVR          | 1,925.89 |
| ATP | 6018 | GANAB protein                                                                                                   | gi 151553519,gi 194679898              | 109,455.80 | 100.00% | 7 | 8 | 9 | 0.08% | 11.20% | VVIIGAG 4.78<br>KPATVV<br>LQTK         | 1,694.06 |
| ATP | 6018 | GANAB protein                                                                                                   | gi 151553519,gi 194679898              | 109,455.80 | 100.00% | 7 | 8 | 9 | 0.08% | 11.20% | YHGPQT 3.02<br>LYLPVT<br>LSSIPVF<br>QR | 2,416.30 |
| ATP | 6018 | Myosin ID                                                                                                       | gi 109659303,gi 115497786,gi 122145769 | 115,924.40 | 100.00% | 4 | 4 | 4 | 0.03% | 5.86%  | DVIDKQ 4.14<br>HTEQEA<br>SYGR          | 1,875.88 |
| ATP | 6018 | Myosin ID                                                                                                       | gi 109659303,gi 115497786,gi 122145769 | 115,924.40 | 100.00% | 4 | 4 | 4 | 0.03% | 5.86%  | LVSIAE 2.99<br>LLSTK                   | 1,286.79 |
| ATP | 6018 | Myosin ID                                                                                                       | gi 109659303,gi 115497786,gi 122145769 | 115,924.40 | 100.00% | 4 | 4 | 4 | 0.03% | 5.86%  | SFHSFYQ 4.92<br>LLQGGG<br>DQMLR        | 2,130.01 |
| ATP | 6018 | Myosin ID                                                                                                       | gi 109659303,gi 115497786,gi 122145769 | 115,924.40 | 100.00% | 4 | 4 | 4 | 0.03% | 5.86%  | VTDEMF 3.7<br>LEALNS<br>K              | 1,512.73 |
| ATP | 6018 | Chromosome 20 open reading frame 3 ortholog                                                                     | gi 74268319,gi 78369434                | 46,074.40  | 100.00% | 3 | 4 | 4 | 0.03% | 9.95%  | GGADV 3.33<br>VENLPG<br>FPDNIR         | 1,916.95 |
| ATP | 6018 | Chromosome 20 open reading frame 3 ortholog                                                                     | gi 74268319,gi 78369434                | 46,074.40  | 100.00% | 3 | 4 | 4 | 0.03% | 9.95%  | LLLSSET 2.59<br>PIEGR                  | 1,314.73 |
| ATP | 6018 | Chromosome 20 open reading frame 3 ortholog                                                                     | gi 74268319,gi 78369434                | 46,074.40  | 100.00% | 3 | 4 | 4 | 0.03% | 9.95%  | MSFLND 3.23<br>LTVTR                   | 1,312.66 |
| ATP | 6018 | RecName: Full=Pyruvate dehydrogenase E1 component subunit beta, mitochondrial; Short=P DHE1-B; Flags: Precursor | gi 116242689,gi 151556071,gi 164420789 | 39,108.20  | 99.80%  | 2 | 2 | 2 | 0.02% | 7.52%  | ILEDNSV 2.81<br>PQVK                   | 1,241.67 |

|     |      |                                                                                                                                                                                                   |            |            |         |   |   |   |       |       |                               |          |
|-----|------|---------------------------------------------------------------------------------------------------------------------------------------------------------------------------------------------------|------------|------------|---------|---|---|---|-------|-------|-------------------------------|----------|
| ATP | 6018 | RecName : Full=Pyr uvate dehydrog enase E1 compone nt subunit beta, mitochon drial; Short=P DHE1-B; Flags: Precursor                                                                              | gi 1162426 | 39,108.20  | 99.80%  | 2 | 2 | 2 | 0.02% | 7.52% | IMEGPAF 3.25<br>NFLDAP<br>AVR | 1,763.88 |
| ATP | 6018 | PREDIC TED: similar to Alpha-mannosid ase 2 (Alpha-mannosid ase II) (Mannos yl- oligosacc haride 1,3-1,6- alpha-mannosid ase) (MAN II) (Golgi alpha-mannosid ase II) (Mannosi dase alpha class 2A | gi 1198960 | 130,855.40 | 100.00% | 3 | 3 | 4 | 0.03% | 4.19% | IQFGTLS 3.97<br>DYFDAL<br>EK  | 1,746.86 |
| ATP | 6018 | PREDIC TED: similar to Alpha-mannosid ase 2 (Alpha-mannosid ase II) (Mannos yl- oligosacc haride 1,3-1,6- alpha-mannosid ase) (MAN II) (Golgi alpha-mannosid ase II) (Mannosi dase alpha class 2A | gi 1198960 | 130,855.40 | 100.00% | 3 | 3 | 4 | 0.03% | 4.19% | TTVVLA 2.73<br>PLGDDF<br>R    | 1,403.75 |

|     |      |                                                                                                                                                                                                   |                                                                                                                                       |            |         |   |   |    |       |        |                                        |      |          |
|-----|------|---------------------------------------------------------------------------------------------------------------------------------------------------------------------------------------------------|---------------------------------------------------------------------------------------------------------------------------------------|------------|---------|---|---|----|-------|--------|----------------------------------------|------|----------|
| ATP | 6018 | PREDICTED: similar to Alpha-mannosidase 2 (Alpha-mannosidase II) (Mannosyl-oligosaccharide 1,3-1,6-alpha-mannosidase) (MAN II) (Golgi alpha-mannosidase II) (Mannosidase alpha class 2A           | gi 119896006                                                                                                                          | 130,855.40 | 100.00% | 3 | 3 | 4  | 0.03% | 4.19%  | YDLYNG<br>NIANEGI<br>FNMNNI<br>K       | 3.19 | 2,333.09 |
| ATP | 6018 | RecName: Full=Mitochondrial fission factor                                                                                                                                                        | gi 122140919,gi 148744119,gi 73586594,gi 77735489                                                                                     | 25,042.40  | 99.90%  | 2 | 2 | 2  | 0.02% | 17.90% | RLQLLE<br>EENKER                       | 3.79 | 1,556.84 |
| ATP | 6018 | RecName: Full=Mitochondrial fission factor                                                                                                                                                        | gi 122140919,gi 148744119,gi 73586594,gi 77735489                                                                                     | 25,042.40  | 99.90%  | 2 | 2 | 2  | 0.02% | 17.90% | VLTLSE<br>PLDFLDL<br>ERPAPTP<br>QNEEIR | 4.73 | 3,148.66 |
| ATP | 6018 | RecName: Full=Cytochrome c oxidase subunit 4 isoform 1, mitochondrial; AltName: Full=Cytochrome c oxidase subunit IV isoform 1; Short=CX IV-1; AltName: Full=Cytochrome c oxidase polypeptide IV; | gi 117085,gi 149241539,gi 149241552,gi 149241569,gi 149241582,gi 149241599,gi 149241612,gi 47824862,gi 506389,gi 59858423,gi 74354123 | 19,554.00  | 100.00% | 4 | 5 | 13 | 0.11% | 20.10% | DYPLPD<br>VAHVK                        | 3.07 | 1,253.65 |

|     |      |                                                                                                                                                                                                                                                                                                                                                                                                                                        |           |         |   |   |    |       |        |                       |          |
|-----|------|----------------------------------------------------------------------------------------------------------------------------------------------------------------------------------------------------------------------------------------------------------------------------------------------------------------------------------------------------------------------------------------------------------------------------------------|-----------|---------|---|---|----|-------|--------|-----------------------|----------|
| ATP | 6018 | RecName gi 117085.g<br>: i 14924153<br>Full=Cyt 9,gi 149241<br>ochrome 552,gi 1492<br>c oxidase 41569,gi 14<br>subunit 4 9241582,gi <br>isoform 149241599,<br>1, gi 1492416<br>mitochon 12,gi 47824<br>drial; 862,gi 5063<br>AltName: 89,gi 59858<br>Full=Cyt 423,gi 7435<br>ochrome 4123<br>c oxidase<br>subunit<br>IV<br>isoform<br>1;<br>Short=C<br>OX IV-1;<br>AltName:<br>Full=Cyt<br>ochrome<br>c oxidase<br>polypepti<br>de IV; | 19,554.00 | 100.00% | 4 | 5 | 13 | 0.11% | 20.10% | FKESFAE 3.47<br>MNR   | 1,274.58 |
| ATP | 6018 | RecName gi 117085.g<br>: i 14924153<br>Full=Cyt 9,gi 149241<br>ochrome 552,gi 1492<br>c oxidase 41569,gi 14<br>subunit 4 9241582,gi <br>isoform 149241599,<br>1, gi 1492416<br>mitochon 12,gi 47824<br>drial; 862,gi 5063<br>AltName: 89,gi 59858<br>Full=Cyt 423,gi 7435<br>ochrome 4123<br>c oxidase<br>subunit<br>IV<br>isoform<br>1;<br>Short=C<br>OX IV-1;<br>AltName:<br>Full=Cyt<br>ochrome<br>c oxidase<br>polypepti<br>de IV; | 19,554.00 | 100.00% | 4 | 5 | 13 | 0.11% | 20.10% | SEDYAL 2.88<br>PSYVDR | 1,414.65 |

|     |      |                                                                                                                                                                                                         |                                      |           |         |   |    |    |       |        |                                        |          |
|-----|------|---------------------------------------------------------------------------------------------------------------------------------------------------------------------------------------------------------|--------------------------------------|-----------|---------|---|----|----|-------|--------|----------------------------------------|----------|
| ATP | 6018 | RecName : Full=Cyt ochrome c oxidase subunit 4 isoform 1, mitochondrial; AltName: Full=Cyt ochrome c oxidase subunit IV isoform 1; Short=C OX IV-1; AltName: Full=Cyt ochrome c oxidase polypeptide IV; | gi 117085,gi 14924153                | 19,554.00 | 100.00% | 4 | 5  | 13 | 0.11% | 20.10% | SEDYAL 2.22<br>PSYVDR<br>R             | 1,570.75 |
| ATP | 6018 | Canx protein                                                                                                                                                                                            | gi 1572791,gi 157785567              | 67,759.10 | 100.00% | 8 | 11 | 27 | 0.23% | 14.30% | APVPTG 4.39<br>EVYFAD<br>SFDR          | 1,770.83 |
| ATP | 6018 | Canx protein                                                                                                                                                                                            | gi 1572791,gi 157785567              | 67,759.10 | 100.00% | 8 | 11 | 27 | 0.23% | 14.30% | IPNPdff 3.76<br>EDLEPFK                | 1,707.83 |
| ATP | 6018 | Canx protein                                                                                                                                                                                            | gi 1572791,gi 157785567              | 67,759.10 | 100.00% | 8 | 11 | 27 | 0.23% | 14.30% | KIPNPdf 5.36<br>FEDLEPF<br>K           | 1,835.92 |
| ATP | 6018 | Canx protein                                                                                                                                                                                            | gi 1572791,gi 157785567              | 67,759.10 | 100.00% | 8 | 11 | 27 | 0.23% | 14.30% | LPgDKG 2.06<br>LVLMSR                  | 1,301.72 |
| ATP | 6018 | Canx protein                                                                                                                                                                                            | gi 1572791,gi 157785567              | 67,759.10 | 100.00% | 8 | 11 | 27 | 0.23% | 14.30% | TDAPQP 3.66<br>DVKEDE<br>EEKEEE<br>K   | 2,245.00 |
| ATP | 6018 | Canx protein                                                                                                                                                                                            | gi 1572791,gi 157785567              | 67,759.10 | 100.00% | 8 | 11 | 27 | 0.23% | 14.30% | TPELNL 4.62<br>DQFHDK                  | 1,456.71 |
| ATP | 6018 | Canx protein                                                                                                                                                                                            | gi 1572791,gi 157785567              | 67,759.10 | 100.00% | 8 | 11 | 27 | 0.23% | 14.30% | TPELNL 5.1<br>DQFHDK<br>TPYTIMF<br>GPK | 2,723.30 |
| ATP | 6018 | Canx protein                                                                                                                                                                                            | gi 1572791,gi 157785567              | 67,759.10 | 100.00% | 8 | 11 | 27 | 0.23% | 14.30% | TPYTIMF 3.38<br>GPK                    | 1,285.61 |
| ATP | 6018 | Nucleobindin 1                                                                                                                                                                                          | gi 1123621,gi 115497814,gi 122142168 | 54,964.80 | 100.00% | 7 | 8  | 16 | 0.14% | 21.50% | AKMDA 4.49<br>QQEPNIQ<br>LDHLNL<br>LK  | 2,335.21 |
| ATP | 6018 | Nucleobindin 1                                                                                                                                                                                          | gi 1123621,gi 115497814,gi 122142168 | 54,964.80 | 100.00% | 7 | 8  | 16 | 0.14% | 21.50% | DLELLIQ 2.84<br>TATR                   | 1,272.72 |
| ATP | 6018 | Nucleobindin 1                                                                                                                                                                                          | gi 1123621,gi 115497814,gi 122142168 | 54,964.80 | 100.00% | 7 | 8  | 16 | 0.14% | 21.50% | ELQQAV 2.53<br>LQMEQR                  | 1,488.75 |
| ATP | 6018 | Nucleobindin 1                                                                                                                                                                                          | gi 1123621,gi 115497814,gi 122142168 | 54,964.80 | 100.00% | 7 | 8  | 16 | 0.14% | 21.50% | KQQQQS 3.97<br>HNNPAP<br>GPEGQL<br>K   | 2,086.04 |



|     |      |                                                  |                                        |            |         |    |    |    |       |        |                                      |      |          |
|-----|------|--------------------------------------------------|----------------------------------------|------------|---------|----|----|----|-------|--------|--------------------------------------|------|----------|
| ATP | 6018 | Nucleobindin 1                                   | gi 112362164,gi 115497814,gi 122142168 | 54,964.80  | 100.00% | 7  | 8  | 16 | 0.14% | 21.50% | LVTLEEF<br>LASTQR                    | 3.28 | 1,506.82 |
| ATP | 6018 | Nucleobindin 1                                   | gi 112362164,gi 115497814,gi 122142168 | 54,964.80  | 100.00% | 7  | 8  | 16 | 0.14% | 21.50% | VNVPGS<br>QAQLK                      | 2.76 | 1,140.64 |
| ATP | 6018 | Nucleobindin 1                                   | gi 112362164,gi 115497814,gi 122142168 | 54,964.80  | 100.00% | 7  | 8  | 16 | 0.14% | 21.50% | YLQEVI<br>NVLETD<br>GHFR             | 2.75 | 1,932.98 |
| ATP | 6018 | embryo-specific fibronectin 1 transcript variant | gi 220028657,gi 76610126               | 262,401.30 | 100.00% | 22 | 30 | 38 | 0.33% | 16.20% | DDKESV<br>PISDTIIP<br>AVPPPT<br>DLR  | 3.95 | 2,475.30 |
| ATP | 6018 | embryo-specific fibronectin 1 transcript variant | gi 220028657,gi 76610126               | 262,401.30 | 100.00% | 22 | 30 | 38 | 0.33% | 16.20% | DLQFVE<br>VTDVK                      | 3.69 | 1,292.67 |
| ATP | 6018 | embryo-specific fibronectin 1 transcript variant | gi 220028657,gi 76610126               | 262,401.30 | 100.00% | 22 | 30 | 38 | 0.33% | 16.20% | EINLAPD<br>SSSVVV<br>SGLMVA<br>TK    | 4.22 | 2,133.11 |
| ATP | 6018 | embryo-specific fibronectin 1 transcript variant | gi 220028657,gi 76610126               | 262,401.30 | 100.00% | 22 | 30 | 38 | 0.33% | 16.20% | GATYNII<br>VEAVK                     | 3.24 | 1,277.71 |
| ATP | 6018 | embryo-specific fibronectin 1 transcript variant | gi 220028657,gi 76610126               | 262,401.30 | 100.00% | 22 | 30 | 38 | 0.33% | 16.20% | GDSPAS<br>SKPVSIN<br>YR              | 3.85 | 1,577.79 |
| ATP | 6018 | embryo-specific fibronectin 1 transcript variant | gi 220028657,gi 76610126               | 262,401.30 | 100.00% | 22 | 30 | 38 | 0.33% | 16.20% | GFNCES<br>KPEPEET<br>CFDKYT<br>GNTYR | 2.83 | 2,815.20 |
| ATP | 6018 | embryo-specific fibronectin 1 transcript variant | gi 220028657,gi 76610126               | 262,401.30 | 100.00% | 22 | 30 | 38 | 0.33% | 16.20% | GLRPGV<br>VYEGQL<br>ISVQHY<br>GQR    | 5.73 | 2,356.25 |
| ATP | 6018 | embryo-specific fibronectin 1 transcript variant | gi 220028657,gi 76610126               | 262,401.30 | 100.00% | 22 | 30 | 38 | 0.33% | 16.20% | LGVRPS<br>QGGEAP<br>R                | 3.38 | 1,323.71 |
| ATP | 6018 | embryo-specific fibronectin 1 transcript variant | gi 220028657,gi 76610126               | 262,401.30 | 100.00% | 22 | 30 | 38 | 0.33% | 16.20% | NLQPGS<br>EYAVSL<br>VAVK             | 4.96 | 1,674.91 |

|     |      |                                                  |                          |            |         |    |    |    |       |        |                                      |      |          |
|-----|------|--------------------------------------------------|--------------------------|------------|---------|----|----|----|-------|--------|--------------------------------------|------|----------|
| ATP | 6018 | embryo-specific fibronectin 1 transcript variant | gi 220028657,gi 76610126 | 262,401.30 | 100.00% | 22 | 30 | 38 | 0.33% | 16.20% | NSITLTN<br>LNPGTE<br>YVVSIV<br>ALNSK | 4.39 | 2,547.37 |
| ATP | 6018 | embryo-specific fibronectin 1 transcript variant | gi 220028657,gi 76610126 | 262,401.30 | 100.00% | 22 | 30 | 38 | 0.33% | 16.20% | NTFAEV<br>TGLSPG<br>VTYHFK           | 5.73 | 1,967.99 |
| ATP | 6018 | embryo-specific fibronectin 1 transcript variant | gi 220028657,gi 76610126 | 262,401.30 | 100.00% | 22 | 30 | 38 | 0.33% | 16.20% | QYNVGP<br>AASQYP<br>LR               | 3.7  | 1,563.79 |
| ATP | 6018 | embryo-specific fibronectin 1 transcript variant | gi 220028657,gi 76610126 | 262,401.30 | 100.00% | 22 | 30 | 38 | 0.33% | 16.20% | RPGAEP<br>GNEGST<br>AHSYNQ<br>YSQR   | 5.5  | 2,406.08 |
| ATP | 6018 | embryo-specific fibronectin 1 transcript variant | gi 220028657,gi 76610126 | 262,401.30 | 100.00% | 22 | 30 | 38 | 0.33% | 16.20% | SSPVVID<br>ASTAIDA<br>PSNLR          | 5.06 | 1,913.00 |
| ATP | 6018 | embryo-specific fibronectin 1 transcript variant | gi 220028657,gi 76610126 | 262,401.30 | 100.00% | 22 | 30 | 38 | 0.33% | 16.20% | STTPDIT<br>GYR                       | 2.7  | 1,110.54 |
| ATP | 6018 | embryo-specific fibronectin 1 transcript variant | gi 220028657,gi 76610126 | 262,401.30 | 100.00% | 22 | 30 | 38 | 0.33% | 16.20% | SYTITGL<br>QPGTDY<br>K               | 4.19 | 1,543.76 |
| ATP | 6018 | embryo-specific fibronectin 1 transcript variant | gi 220028657,gi 76610126 | 262,401.30 | 100.00% | 22 | 30 | 38 | 0.33% | 16.20% | TEIDKPS<br>QMQVT<br>DVQDNS<br>ISVR   | 5.9  | 2,506.21 |
| ATP | 6018 | embryo-specific fibronectin 1 transcript variant | gi 220028657,gi 76610126 | 262,401.30 | 100.00% | 22 | 30 | 38 | 0.33% | 16.20% | TETITGF<br>QVDAIP<br>ANGQTPI<br>QR   | 3.8  | 2,357.21 |
| ATP | 6018 | embryo-specific fibronectin 1 transcript variant | gi 220028657,gi 76610126 | 262,401.30 | 100.00% | 22 | 30 | 38 | 0.33% | 16.20% | TKTETIT<br>GFQVDA<br>IPANGQT<br>PIQR | 3.35 | 2,586.35 |
| ATP | 6018 | embryo-specific fibronectin 1 transcript variant | gi 220028657,gi 76610126 | 262,401.30 | 100.00% | 22 | 30 | 38 | 0.33% | 16.20% | VDVIPV<br>NLPGEH<br>GQR              | 3.24 | 1,629.87 |

|     |      |                                                                  |                                       |            |         |    |    |    |       |        |                                                        |      |          |
|-----|------|------------------------------------------------------------------|---------------------------------------|------------|---------|----|----|----|-------|--------|--------------------------------------------------------|------|----------|
| ATP | 6018 | embryo-specific fibronectin 1 transcript variant                 | gi 220028657,gi 76610126              | 262,401.30 | 100.00% | 22 | 30 | 38 | 0.33% | 16.20% | VEYELS<br>EEGDEP<br>QYLDLP<br>STATSV<br>NIPDLLP<br>GRK | 3.68 | 3,774.86 |
| ATP | 6018 | embryo-specific fibronectin 1 transcript variant                 | gi 220028657,gi 76610126              | 262,401.30 | 100.00% | 22 | 30 | 38 | 0.33% | 16.20% | VPGTSA<br>SATLTG<br>LTR                                | 4.52 | 1,431.78 |
| ATP | 6018 | nicalin                                                          | gi 115494944,gi 94534903              | 63,091.10  | 100.00% | 4  | 4  | 5  | 0.04% | 10.30% | AAQLVD<br>KDGTF<br>STLEHY<br>LSR                       | 6.19 | 2,364.22 |
| ATP | 6018 | nicalin                                                          | gi 115494944,gi 94534903              | 63,091.10  | 100.00% | 4  | 4  | 5  | 0.04% | 10.30% | ELETVA<br>AHQFPE<br>VR                                 | 3.64 | 1,625.83 |
| ATP | 6018 | nicalin                                                          | gi 115494944,gi 94534903              | 63,091.10  | 100.00% | 4  | 4  | 5  | 0.04% | 10.30% | MQQYDL<br>QGQPYG<br>TR                                 | 3.77 | 1,700.77 |
| ATP | 6018 | nicalin                                                          | gi 115494944,gi 94534903              | 63,091.10  | 100.00% | 4  | 4  | 5  | 0.04% | 10.30% | TIDADV<br>LSR                                          | 2.61 | 989.5263 |
| ATP | 6018 | translocation of outer mitochondrial membrane 40                 | gi 115495635,gi 122134275,gi 94534905 | 37,707.00  | 100.00% | 5  | 7  | 11 | 0.09% | 22.70% | KLPLPL<br>TLALGA<br>FLNHR                              | 2.86 | 1,971.19 |
| ATP | 6018 | translocation of outer mitochondrial membrane 40                 | gi 115495635,gi 122134275,gi 94534905 | 37,707.00  | 100.00% | 5  | 7  | 11 | 0.09% | 22.70% | LPPLPL<br>LALGAF<br>LNHR                               | 1.31 | 1,843.10 |
| ATP | 6018 | translocation of outer mitochondrial membrane 40                 | gi 115495635,gi 122134275,gi 94534905 | 37,707.00  | 100.00% | 5  | 7  | 11 | 0.09% | 22.70% | MQDTSV<br>SFGYQL<br>DLPK                               | 4.07 | 1,844.87 |
| ATP | 6018 | translocation of outer mitochondrial membrane 40                 | gi 115495635,gi 122134275,gi 94534905 | 37,707.00  | 100.00% | 5  | 7  | 11 | 0.09% | 22.70% | QLSPTEA<br>FPVLVG<br>DMDNSG<br>SLNAQVI<br>HQLGPG<br>LR | 3.74 | 3,576.81 |
| ATP | 6018 | translocation of outer mitochondrial membrane 40                 | gi 115495635,gi 122134275,gi 94534905 | 37,707.00  | 100.00% | 5  | 7  | 11 | 0.09% | 22.70% | RPGEEG<br>AVMSLA<br>GK                                 | 3.63 | 1,417.71 |
| ATP | 6018 | PREDICTED: ATPase, Ca++ transporter, plasma membrane 4 isoform 5 | gi 119908026                          | 133,777.70 | 100.00% | 13 | 14 | 14 | 0.12% | 14.50% | ADVGF<br>MGIAGT<br>DVAK                                | 3.91 | 1,538.75 |

|     |      |                                                                   |              |            |         |    |    |    |       |        |                                    |      |          |
|-----|------|-------------------------------------------------------------------|--------------|------------|---------|----|----|----|-------|--------|------------------------------------|------|----------|
| ATP | 6018 | PREDICTED: ATPase, Ca++ transporting, plasma membrane 4 isoform 5 | gi 119908026 | 133,777.70 | 100.00% | 13 | 14 | 14 | 0.12% | 14.50% | EASDIIL<br>TDDNFT<br>SIVK          | 4.1  | 1,880.95 |
| ATP | 6018 | PREDICTED: ATPase, Ca++ transporting, plasma membrane 4 isoform 5 | gi 119908026 | 133,777.70 | 100.00% | 13 | 14 | 14 | 0.12% | 14.50% | GIIDSTV<br>GDQR                    | 3.43 | 1,160.59 |
| ATP | 6018 | PREDICTED: ATPase, Ca++ transporting, plasma membrane 4 isoform 5 | gi 119908026 | 133,777.70 | 100.00% | 13 | 14 | 14 | 0.12% | 14.50% | IDESSLT<br>GESDHV<br>KK            | 4.05 | 1,644.81 |
| ATP | 6018 | PREDICTED: ATPase, Ca++ transporting, plasma membrane 4 isoform 5 | gi 119908026 | 133,777.70 | 100.00% | 13 | 14 | 14 | 0.12% | 14.50% | KADVGF<br>AMGIAG<br>TDVAK          | 5.33 | 1,666.85 |
| ATP | 6018 | PREDICTED: ATPase, Ca++ transporting, plasma membrane 4 isoform 5 | gi 119908026 | 133,777.70 | 100.00% | 13 | 14 | 14 | 0.12% | 14.50% | LKTNPV<br>EGLSGN<br>PADLEK         | 4.88 | 1,881.99 |
| ATP | 6018 | PREDICTED: ATPase, Ca++ transporting, plasma membrane 4 isoform 5 | gi 119908026 | 133,777.70 | 100.00% | 13 | 14 | 14 | 0.12% | 14.50% | NQNSIH<br>NFMTHP<br>EFTIDEE<br>GPR | 3.14 | 2,629.17 |
| ATP | 6018 | PREDICTED: ATPase, Ca++ transporting, plasma membrane 4 isoform 5 | gi 119908026 | 133,777.70 | 100.00% | 13 | 14 | 14 | 0.12% | 14.50% | QVAVT<br>GDGTND<br>GPALK           | 5.19 | 1,641.84 |

|     |      |                                                                                                |                                                                                                     |            |         |    |    |    |       |        |                               |      |          |
|-----|------|------------------------------------------------------------------------------------------------|-----------------------------------------------------------------------------------------------------|------------|---------|----|----|----|-------|--------|-------------------------------|------|----------|
| ATP | 6018 | PREDIC TED: ATPase, Ca++ transporting, plasma membrane 4 isoform 5                             | gi 119908026                                                                                        | 133,777.70 | 100.00% | 13 | 14 | 14 | 0.12% | 14.50% | QVVAVT GDGTND GPALKK          | 3.73 | 1,769.94 |
| ATP | 6018 | PREDIC TED: ATPase, Ca++ transporting, plasma membrane 4 isoform 5                             | gi 119908026                                                                                        | 133,777.70 | 100.00% | 13 | 14 | 14 | 0.12% | 14.50% | TNPVEG LSGNPA DLEK            | 4.09 | 1,640.81 |
| ATP | 6018 | PREDIC TED: ATPase, Ca++ transporting, plasma membrane 4 isoform 5                             | gi 119908026                                                                                        | 133,777.70 | 100.00% | 13 | 14 | 14 | 0.12% | 14.50% | TPLLDE QEEEIFE K              | 4.91 | 1,719.83 |
| ATP | 6018 | PREDIC TED: ATPase, Ca++ transporting, plasma membrane 4 isoform 5                             | gi 119908026                                                                                        | 133,777.70 | 100.00% | 13 | 14 | 14 | 0.12% | 14.50% | TQDQVA LEIQPLN SQEGIDS EEKEKK | 3.98 | 2,885.44 |
| ATP | 6018 | PREDIC TED: ATPase, Ca++ transporting, plasma membrane 4 isoform 5                             | gi 119908026                                                                                        | 133,777.70 | 100.00% | 13 | 14 | 14 | 0.12% | 14.50% | YGDLLP ADGILIQ GNDLK          | 3.86 | 1,915.02 |
| ATP | 6018 | PREDIC TED: similar to histone H2aj cluster 1, 98282091, gi 76619954, gi 76631269, gi 76633542 | gi 119915559, gi 119915725, gi 11991939855, gi 1199198282091, gi 76619954, gi 76631269, gi 76633542 | 14,074.00  | 100.00% | 5  | 8  | 27 | 0.23% | 57.70% | AGLQFP VGR                    | 3.43 | 944.5313 |
| ATP | 6018 | PREDIC TED: similar to histone H2aj cluster 1, 98282091, gi 76619954, gi 76631269, gi 76633542 | gi 119915559, gi 119915725, gi 11991939855, gi 1199198282091, gi 76619954, gi 76631269, gi 76633542 | 14,074.00  | 100.00% | 5  | 8  | 27 | 0.23% | 57.70% | HLQLAIR                       | 2.29 | 850.5258 |

|     |      |                                                              |                                                                                                                         |           |         |   |   |    |       |        |                                                |      |          |
|-----|------|--------------------------------------------------------------|-------------------------------------------------------------------------------------------------------------------------|-----------|---------|---|---|----|-------|--------|------------------------------------------------|------|----------|
| ATP | 6018 | PREDIC TED:<br>similar to<br>histone<br>cluster 1,<br>H2aj   | gi 1199155<br>59,gi 11991<br>5725,gi 119<br>939855,gi 1<br>98282091,g<br>i 76619954,<br>gi 7663126<br>9,gi 766335<br>42 | 14,074.00 | 100.00% | 5 | 8 | 27 | 0.23% | 57.70% | NDEELN<br>KLLGK                                | 3.7  | 1,272.68 |
| ATP | 6018 | PREDIC TED:<br>similar to<br>histone<br>cluster 1,<br>H2aj   | gi 1199155<br>59,gi 11991<br>5725,gi 119<br>939855,gi 1<br>98282091,g<br>i 76619954,<br>gi 7663126<br>9,gi 766335<br>42 | 14,074.00 | 100.00% | 5 | 8 | 27 | 0.23% | 57.70% | VGAGAP<br>VYLA AV<br>LEYLTA<br>EILELAG<br>NAAR | 5.71 | 2,915.59 |
| ATP | 6018 | PREDIC TED:<br>similar to<br>histone<br>cluster 1,<br>H2aj   | gi 1199155<br>59,gi 11991<br>5725,gi 119<br>939855,gi 1<br>98282091,g<br>i 76619954,<br>gi 7663126<br>9,gi 766335<br>42 | 14,074.00 | 100.00% | 5 | 8 | 27 | 0.23% | 57.70% | VTIAQG<br>GVL PNIQ<br>AVLLPK                   | 4.42 | 1,931.17 |
| ATP | 6018 | cpn10<br>protein                                             | gi 1167,gi 2<br>7805927,gi <br>47606334,g<br>i 74354139                                                                 | 10,913.70 | 99.90%  | 2 | 2 | 2  | 0.02% | 25.50% | VLQATV<br>VAVGSG<br>SK                         | 3.41 | 1,315.76 |
| ATP | 6018 | cpn10<br>protein                                             | gi 1167,gi 2<br>7805927,gi <br>47606334,g<br>i 74354139                                                                 | 10,913.70 | 99.90%  | 2 | 2 | 2  | 0.02% | 25.50% | VVLDDK<br>DYFLFR                               | 2.69 | 1,529.80 |
| ATP | 6018 | RecName<br>:<br>Full=Nuc<br>leophosm<br>in;<br>Short=N<br>PM | gi 1162485<br>56,gi 74353<br>960,gi 7836<br>9456                                                                        | 32,685.20 | 99.80%  | 2 | 3 | 5  | 0.04% | 11.60% | MSVQPT<br>VSLGGF<br>EITPPVV<br>LR              | 5.58 | 2,243.21 |
| ATP | 6018 | RecName<br>:<br>Full=Nuc<br>leophosm<br>in;<br>Short=N<br>PM | gi 1162485<br>56,gi 74353<br>960,gi 7836<br>9456                                                                        | 32,685.20 | 99.80%  | 2 | 3 | 5  | 0.04% | 11.60% | VDNDEN<br>EHQLSL<br>R                          | 4.08 | 1,568.73 |
| ATP | 6018 | Plexin<br>domain<br>containin<br>g 2                         | gi 1173066<br>39,gi 11815<br>0958                                                                                       | 59,450.20 | 100.00% | 3 | 3 | 3  | 0.03% | 8.29%  | EIPVLVT<br>QISSTNH<br>PVK                      | 4.46 | 1,862.04 |
| ATP | 6018 | Plexin<br>domain<br>containin<br>g 2                         | gi 1173066<br>39,gi 11815<br>0958                                                                                       | 59,450.20 | 100.00% | 3 | 3 | 3  | 0.03% | 8.29%  | VGLSDA<br>FVVVHR                               | 3.71 | 1,298.72 |
| ATP | 6018 | Plexin<br>domain<br>containin<br>g 2                         | gi 1173066<br>39,gi 11815<br>0958                                                                                       | 59,450.20 | 100.00% | 3 | 3 | 3  | 0.03% | 8.29%  | VNLSFD<br>FPFYGHF<br>LR                        | 3.2  | 1,858.93 |

|     |      |                                                                                                                                                                                                                                                                                                                                                            |           |         |    |    |    |       |        |                                                 |      |          |
|-----|------|------------------------------------------------------------------------------------------------------------------------------------------------------------------------------------------------------------------------------------------------------------------------------------------------------------------------------------------------------------|-----------|---------|----|----|----|-------|--------|-------------------------------------------------|------|----------|
| ATP | 6018 | RecName gi 1221401 : 46,gi 74353<br>Full=OCI 966,gi 7773<br>A domain-5471<br>containin<br>g protein<br>2                                                                                                                                                                                                                                                   | 16,827.50 | 99.80%  | 2  | 2  | 2  | 0.02% | 14.30% | FHSFEG<br>QLR                                   | 2.9  | 1,120.55 |
| ATP | 6018 | RecName gi 1221401 : 46,gi 74353<br>Full=OCI 966,gi 7773<br>A domain-5471<br>containin<br>g protein<br>2                                                                                                                                                                                                                                                   | 16,827.50 | 99.80%  | 2  | 2  | 2  | 0.02% | 14.30% | VALAGIL<br>GFGLGK                               | 4    | 1,215.75 |
| ATP | 6018 | RecName gi 1363791 : 4,gi 194679<br>Full=Cat 949,gi 2995<br>hepsin D; 22<br>Flags:<br>Precursor                                                                                                                                                                                                                                                            | 37,693.30 | 100.00% | 2  | 2  | 2  | 0.02% | 9.54%  | AQPGGE<br>LMLGGT<br>DSK                         | 2.46 | 1,476.70 |
| ATP | 6018 | RecName gi 1363791 : 4,gi 194679<br>Full=Cat 949,gi 2995<br>hepsin D; 22<br>Flags:<br>Precursor                                                                                                                                                                                                                                                            | 37,693.30 | 100.00% | 2  | 2  | 2  | 0.02% | 9.54%  | QTFGEAI<br>KQPGVV<br>FIAAK                      | 2.87 | 1,904.06 |
| ATP | 6018 | RecName gi 1221402 : 31,gi 14623<br>Full=Doli 1756,gi 742<br>chyl- 67729,gi 77<br>diphosph 736155<br>ooligosac<br>charide--<br>protein<br>glycosyltr<br>ansferase<br>subunit<br>2;<br>AltName:<br>Full=Doli<br>chyl-<br>diphosph<br>ooligosac<br>charide--<br>protein<br>glycosyltr<br>ansferase<br>63 kDa<br>subunit;<br>AltName:<br>Full=Rib<br>ophorin- | 69,197.20 | 100.00% | 18 | 25 | 39 | 0.33% | 51.70% | ASLDRPF<br>TSLESAF<br>YSIVGLS<br>SLGAQV<br>PDVK | 4.66 | 3,254.69 |

|     |      |                                                                                                                                                                                                                                                                                                                 |                                                                   |           |         |    |    |    |       |        |                                                                         |          |
|-----|------|-----------------------------------------------------------------------------------------------------------------------------------------------------------------------------------------------------------------------------------------------------------------------------------------------------------------|-------------------------------------------------------------------|-----------|---------|----|----|----|-------|--------|-------------------------------------------------------------------------|----------|
| ATP | 6018 | RecName gi 1221402 :<br>Full=Doli<br>chyl-<br>diphosph<br>ooligosac<br>charide--<br>protein<br>glycosyltr<br>ansferase<br>subunit<br>2;<br>AltName:<br>Full=Doli<br>chyl-<br>diphosph<br>ooligosac<br>charide--<br>protein<br>glycosyltr<br>ansferase<br>63 kDa<br>subunit;<br>AltName:<br>Full=Rib<br>ophorin- | gi 1221402<br>31.gi 14623<br>1756.gi 742<br>67729.gi 77<br>736155 | 69,197.20 | 100.00% | 18 | 25 | 39 | 0.33% | 51.70% | ASLDRPF 4.71<br>TSLESFAF<br>YSIVGLS<br>SLGAQV<br>PDVKK                  | 3,382.79 |
| ATP | 6018 | RecName gi 1221402 :<br>Full=Doli<br>chyl-<br>diphosph<br>ooligosac<br>charide--<br>protein<br>glycosyltr<br>ansferase<br>subunit<br>2;<br>AltName:<br>Full=Doli<br>chyl-<br>diphosph<br>ooligosac<br>charide--<br>protein<br>glycosyltr<br>ansferase<br>63 kDa<br>subunit;<br>AltName:<br>Full=Rib<br>ophorin- | gi 1221402<br>31.gi 14623<br>1756.gi 742<br>67729.gi 77<br>736155 | 69,197.20 | 100.00% | 18 | 25 | 39 | 0.33% | 51.70% | DLLLAA 4.34<br>VSEDSS<br>VAQIYH<br>AVAALS<br>GFGLPL<br>ASQEAL<br>GALTAR | 4,196.22 |



|     |      |                                                                                                                                                                                                                                                                                                                                                               |           |         |    |    |    |       |        |                                           |          |
|-----|------|---------------------------------------------------------------------------------------------------------------------------------------------------------------------------------------------------------------------------------------------------------------------------------------------------------------------------------------------------------------|-----------|---------|----|----|----|-------|--------|-------------------------------------------|----------|
| ATP | 6018 | RecName gi 1221402<br>: 31.gi 14623<br>Full=Doli 1756.gi 742<br>chyl- 67729.gi 77<br>diphosph 736155<br>ooligosac<br>charide--<br>protein<br>glycosyltr<br>ansferase<br>subunit<br>2;<br>AltName:<br>Full=Doli<br>chyl-<br>diphosph<br>ooligosac<br>charide--<br>protein<br>glycosyltr<br>ansferase<br>63 kDa<br>subunit;<br>AltName:<br>Full=Rib<br>ophorin- | 69,197.20 | 100.00% | 18 | 25 | 39 | 0.33% | 51.70% | EETVLA 3.35<br>TVQALQ<br>TASYLS<br>QQADLR | 2,635.36 |
| ATP | 6018 | RecName gi 1221402<br>: 31.gi 14623<br>Full=Doli 1756.gi 742<br>chyl- 67729.gi 77<br>diphosph 736155<br>ooligosac<br>charide--<br>protein<br>glycosyltr<br>ansferase<br>subunit<br>2;<br>AltName:<br>Full=Doli<br>chyl-<br>diphosph<br>ooligosac<br>charide--<br>protein<br>glycosyltr<br>ansferase<br>63 kDa<br>subunit;<br>AltName:<br>Full=Rib<br>ophorin- | 69,197.20 | 100.00% | 18 | 25 | 39 | 0.33% | 51.70% | FSSGYY 2.99<br>DFSVK                      | 1,299.59 |

|     |      |                                                                                                                                                                                                                                                                                                                    |                                                                   |           |         |    |    |    |       |        |                                                              |          |
|-----|------|--------------------------------------------------------------------------------------------------------------------------------------------------------------------------------------------------------------------------------------------------------------------------------------------------------------------|-------------------------------------------------------------------|-----------|---------|----|----|----|-------|--------|--------------------------------------------------------------|----------|
| ATP | 6018 | RecName gi 1221402<br>:<br>Full=Doli<br>chyl-<br>diphosph<br>ooligosac<br>charide--<br>protein<br>glycosyltr<br>ansferase<br>subunit<br>2;<br>AltName:<br>Full=Doli<br>chyl-<br>diphosph<br>ooligosac<br>charide--<br>protein<br>glycosyltr<br>ansferase<br>63 kDa<br>subunit;<br>AltName:<br>Full=Rib<br>ophorin- | gi 1221402<br>31.gi 14623<br>1756.gi 742<br>67729.gi 77<br>736155 | 69,197.20 | 100.00% | 18 | 25 | 39 | 0.33% | 51.70% | GTFIADS 3.35<br>HQNFBAL<br>FFQLVD<br>VNTGAE<br>LTPHQT<br>FVR | 3,820.91 |
| ATP | 6018 | RecName gi 1221402<br>:<br>Full=Doli<br>chyl-<br>diphosph<br>ooligosac<br>charide--<br>protein<br>glycosyltr<br>ansferase<br>subunit<br>2;<br>AltName:<br>Full=Doli<br>chyl-<br>diphosph<br>ooligosac<br>charide--<br>protein<br>glycosyltr<br>ansferase<br>63 kDa<br>subunit;<br>AltName:<br>Full=Rib<br>ophorin- | gi 1221402<br>31.gi 14623<br>1756.gi 742<br>67729.gi 77<br>736155 | 69,197.20 | 100.00% | 18 | 25 | 39 | 0.33% | 51.70% | ISTEVGI 5.36<br>TNVDLS<br>TVDKDQ<br>SIAPK                    | 2,530.33 |

|     |      |                                                                                                                                                                                                                                                                                                                    |                                                                   |           |         |    |    |    |       |        |                                          |          |
|-----|------|--------------------------------------------------------------------------------------------------------------------------------------------------------------------------------------------------------------------------------------------------------------------------------------------------------------------|-------------------------------------------------------------------|-----------|---------|----|----|----|-------|--------|------------------------------------------|----------|
| ATP | 6018 | RecName gi 1221402<br>:<br>Full=Doli<br>chyl-<br>diphosph<br>ooligosac<br>charide--<br>protein<br>glycosyltr<br>ansferase<br>subunit<br>2;<br>AltName:<br>Full=Doli<br>chyl-<br>diphosph<br>ooligosac<br>charide--<br>protein<br>glycosyltr<br>ansferase<br>63 kDa<br>subunit;<br>AltName:<br>Full=Rib<br>ophorin- | gi 1221402<br>31.gi 14623<br>1756.gi 742<br>67729.gi 77<br>736155 | 69,197.20 | 100.00% | 18 | 25 | 39 | 0.33% | 51.70% | KLEFDS 3.24<br>ASGTYT<br>LYLIIGD<br>ATLK | 2,519.33 |
| ATP | 6018 | RecName gi 1221402<br>:<br>Full=Doli<br>chyl-<br>diphosph<br>ooligosac<br>charide--<br>protein<br>glycosyltr<br>ansferase<br>subunit<br>2;<br>AltName:<br>Full=Doli<br>chyl-<br>diphosph<br>ooligosac<br>charide--<br>protein<br>glycosyltr<br>ansferase<br>63 kDa<br>subunit;<br>AltName:<br>Full=Rib<br>ophorin- | gi 1221402<br>31.gi 14623<br>1756.gi 742<br>67729.gi 77<br>736155 | 69,197.20 | 100.00% | 18 | 25 | 39 | 0.33% | 51.70% | KNFESLS 3.85<br>EAFSVA<br>SAAAAL<br>SENR | 2,399.18 |

|     |      |                                                                                                                                                                                                                                                                                                                 |                                                                   |           |         |    |    |    |       |        |                                             |      |          |
|-----|------|-----------------------------------------------------------------------------------------------------------------------------------------------------------------------------------------------------------------------------------------------------------------------------------------------------------------|-------------------------------------------------------------------|-----------|---------|----|----|----|-------|--------|---------------------------------------------|------|----------|
| ATP | 6018 | RecName gi 1221402 :<br>Full=Doli<br>chyl-<br>diphosph<br>ooligosac<br>charide--<br>protein<br>glycosyltr<br>ansferase<br>subunit<br>2;<br>AltName:<br>Full=Doli<br>chyl-<br>diphosph<br>ooligosac<br>charide--<br>protein<br>glycosyltr<br>ansferase<br>63 kDa<br>subunit;<br>AltName:<br>Full=Rib<br>ophorin- | gi 1221402<br>31.gi 14623<br>1756.gi 742<br>67729.gi 77<br>736155 | 69,197.20 | 100.00% | 18 | 25 | 39 | 0.33% | 51.70% | LDELGG<br>VYLQFE<br>EGLETT<br>ALFVAA<br>TYK | 4.59 | 2,977.51 |
| ATP | 6018 | RecName gi 1221402 :<br>Full=Doli<br>chyl-<br>diphosph<br>ooligosac<br>charide--<br>protein<br>glycosyltr<br>ansferase<br>subunit<br>2;<br>AltName:<br>Full=Doli<br>chyl-<br>diphosph<br>ooligosac<br>charide--<br>protein<br>glycosyltr<br>ansferase<br>63 kDa<br>subunit;<br>AltName:<br>Full=Rib<br>ophorin- | gi 1221402<br>31.gi 14623<br>1756.gi 742<br>67729.gi 77<br>736155 | 69,197.20 | 100.00% | 18 | 25 | 39 | 0.33% | 51.70% | LMDHVG<br>TEPSIKE<br>DQVIQL<br>MNAIFS<br>K  | 5.72 | 2,959.49 |

|     |      |                                                                                                                                                                                                                                                                                                                    |            |           |         |    |    |    |       |        |                                         |          |
|-----|------|--------------------------------------------------------------------------------------------------------------------------------------------------------------------------------------------------------------------------------------------------------------------------------------------------------------------|------------|-----------|---------|----|----|----|-------|--------|-----------------------------------------|----------|
| ATP | 6018 | RecName gi 1221402<br>:<br>Full=Doli<br>chyl-<br>diphosph<br>ooligosac<br>charide--<br>protein<br>glycosyltr<br>ansferase<br>subunit<br>2;<br>AltName:<br>Full=Doli<br>chyl-<br>diphosph<br>ooligosac<br>charide--<br>protein<br>glycosyltr<br>ansferase<br>63 kDa<br>subunit;<br>AltName:<br>Full=Rib<br>ophorin- | gi 1221402 | 69,197.20 | 100.00% | 18 | 25 | 39 | 0.33% | 51.70% | LQVTNV 4.78<br>LSQPLTQ<br>ATVK          | 1,840.05 |
| ATP | 6018 | RecName gi 1221402<br>:<br>Full=Doli<br>chyl-<br>diphosph<br>ooligosac<br>charide--<br>protein<br>glycosyltr<br>ansferase<br>subunit<br>2;<br>AltName:<br>Full=Doli<br>chyl-<br>diphosph<br>ooligosac<br>charide--<br>protein<br>glycosyltr<br>ansferase<br>63 kDa<br>subunit;<br>AltName:<br>Full=Rib<br>ophorin- | gi 1221402 | 69,197.20 | 100.00% | 18 | 25 | 39 | 0.33% | 51.70% | LQVTNV 2.77<br>LSQPLTQ<br>ATVKLE<br>HAK | 2,418.37 |

|     |      |                                                                                                                                                                                                                                                                                                                                                            |           |         |    |    |    |       |        |                                                  |          |
|-----|------|------------------------------------------------------------------------------------------------------------------------------------------------------------------------------------------------------------------------------------------------------------------------------------------------------------------------------------------------------------|-----------|---------|----|----|----|-------|--------|--------------------------------------------------|----------|
| ATP | 6018 | RecName gi 1221402 : 31.gi 14623<br>Full=Doli 1756.gi 742<br>chyl- 67729.gi 77<br>diphosph 736155<br>ooligosac<br>charide--<br>protein<br>glycosyltr<br>ansferase<br>subunit<br>2;<br>AltName:<br>Full=Doli<br>chyl-<br>diphosph<br>ooligosac<br>charide--<br>protein<br>glycosyltr<br>ansferase<br>63 kDa<br>subunit;<br>AltName:<br>Full=Rib<br>ophorin- | 69,197.20 | 100.00% | 18 | 25 | 39 | 0.33% | 51.70% | LSKEET 5.89<br>VLATVQ<br>ALQTAS<br>YLSQQA<br>DLR | 2,963.57 |
| ATP | 6018 | RecName gi 1221402 : 31.gi 14623<br>Full=Doli 1756.gi 742<br>chyl- 67729.gi 77<br>diphosph 736155<br>ooligosac<br>charide--<br>protein<br>glycosyltr<br>ansferase<br>subunit<br>2;<br>AltName:<br>Full=Doli<br>chyl-<br>diphosph<br>ooligosac<br>charide--<br>protein<br>glycosyltr<br>ansferase<br>63 kDa<br>subunit;<br>AltName:<br>Full=Rib<br>ophorin- | 69,197.20 | 100.00% | 18 | 25 | 39 | 0.33% | 51.70% | NFESLSE 4.08<br>AFSVAS<br>AAAALS<br>ENR          | 2,271.09 |

|     |      |                                                                                                                                                                                                                                                                                                                    |           |         |    |    |    |       |        |                        |      |          |
|-----|------|--------------------------------------------------------------------------------------------------------------------------------------------------------------------------------------------------------------------------------------------------------------------------------------------------------------------|-----------|---------|----|----|----|-------|--------|------------------------|------|----------|
| ATP | 6018 | RecName gi 1221402<br>:<br>Full=Doli<br>chyl-<br>diphosph<br>ooligosac<br>charide--<br>protein<br>glycosyltr<br>ansferase<br>subunit<br>2;<br>AltName:<br>Full=Doli<br>chyl-<br>diphosph<br>ooligosac<br>charide--<br>protein<br>glycosyltr<br>ansferase<br>63 kDa<br>subunit;<br>AltName:<br>Full=Rib<br>ophorin- | 69,197.20 | 100.00% | 18 | 25 | 39 | 0.33% | 51.70% | SIVEEIE<br>DLVAR       | 4.64 | 1,372.73 |
| ATP | 6018 | RecName gi 1221402<br>:<br>Full=Doli<br>chyl-<br>diphosph<br>ooligosac<br>charide--<br>protein<br>glycosyltr<br>ansferase<br>subunit<br>2;<br>AltName:<br>Full=Doli<br>chyl-<br>diphosph<br>ooligosac<br>charide--<br>protein<br>glycosyltr<br>ansferase<br>63 kDa<br>subunit;<br>AltName:<br>Full=Rib<br>ophorin- | 69,197.20 | 100.00% | 18 | 25 | 39 | 0.33% | 51.70% | TGQEVV<br>FVAEPD<br>SK | 3.87 | 1,505.75 |

|     |      |                                                                                                                                                                                                                              |           |         |    |    |    |       |        |                                             |      |          |
|-----|------|------------------------------------------------------------------------------------------------------------------------------------------------------------------------------------------------------------------------------|-----------|---------|----|----|----|-------|--------|---------------------------------------------|------|----------|
| ATP | 6018 | RecName : gi 1221402 : Full=Doli chyl-diphosph oligosac charide-- protein glycosyltr ansferase subunit 2; AltName: Full=Doli chyl-diphosph oligosac charide-- protein glycosyltr ansferase 63 kDa subunit; AltName: Full=Rib | 69,197.20 | 100.00% | 18 | 25 | 39 | 0.33% | 51.70% | YIANTV ELR                                  | 3.18 | 1,078.59 |
| ATP | 6018 | RecName : gi 1173072 : Full=60S acidic ribosomal protein P2                                                                                                                                                                  | 11,684.40 | 100.00% | 3  | 3  | 3  | 0.03% | 56.50% | ILDSVGI EADDDR LNK                          | 4.12 | 1,772.90 |
| ATP | 6018 | RecName : gi 1173072 : Full=60S acidic ribosomal protein P2                                                                                                                                                                  | 11,684.40 | 100.00% | 3  | 3  | 3  | 0.03% | 56.50% | LASVPA GGAVAV SAAPGS AAPAAG SAPAAA EEKKEE K | 3.31 | 3,288.71 |
| ATP | 6018 | RecName : gi 1173072 : Full=60S acidic ribosomal protein P2                                                                                                                                                                  | 11,684.40 | 100.00% | 3  | 3  | 3  | 0.03% | 56.50% | NIEDVIA QGIGK                               | 2.7  | 1,256.68 |
| ATP | 6018 | PREDIC TED: gi 1198907 : similar to Calcium-binding mitochondrial carrier protein Aralar2 (Mitochondrial aspartate glutamate carrier 2) (Solute carrier family 25 member 13) (Citrin)                                        | 74,177.70 | 100.00% | 3  | 4  | 4  | 0.03% | 9.78%  | FGQVTP MEVDIL FQLADL YEPR                   | 3.13 | 2,597.30 |



|     |      |                                                                                                                                                                                                                                           |                  |           |         |   |   |   |       |       |                                 |          |
|-----|------|-------------------------------------------------------------------------------------------------------------------------------------------------------------------------------------------------------------------------------------------|------------------|-----------|---------|---|---|---|-------|-------|---------------------------------|----------|
| ATP | 6018 | PREDIC<br>TED:<br>similar to<br>Calcium-<br>binding<br>mitochon-<br>drial<br>carrier<br>protein<br>Aralar2<br>(Mitochon-<br>drial<br>aspartate<br>glutamate<br>carrier 2)<br>(Solute<br>carrier<br>family 25<br>member<br>13)<br>(Citrin) | gi 1198907<br>34 | 74,177.70 | 100.00% | 3 | 4 | 4 | 0.03% | 9.78% | GLLPQLL 2.52<br>GVAPEK          | 1,334.80 |
| ATP | 6018 | PREDIC<br>TED:<br>similar to<br>Calcium-<br>binding<br>mitochon-<br>drial<br>carrier<br>protein<br>Aralar2<br>(Mitochon-<br>drial<br>aspartate<br>glutamate<br>carrier 2)<br>(Solute<br>carrier<br>family 25<br>member<br>13)<br>(Citrin) | gi 1198907<br>34 | 74,177.70 | 100.00% | 3 | 4 | 4 | 0.03% | 9.78% | IAPLEEG 5.27<br>TLPFNLA<br>EAQR | 1,969.04 |
| ATP | 6018 | PREDIC<br>TED:<br>similar to<br>Calcium-<br>binding<br>mitochon-<br>drial<br>carrier<br>protein<br>Aralar2<br>(Mitochon-<br>drial<br>aspartate<br>glutamate<br>carrier 2)<br>(Solute<br>carrier<br>family 25<br>member<br>13)<br>(Citrin) | gi 1198907<br>34 | 74,177.70 | 100.00% | 3 | 4 | 4 | 0.03% | 9.78% | YLNIFGE 3.34<br>SQPNPK          | 1,506.76 |

|     |      |                                                                                                                                                                                                                                                                                                                   |           |        |   |   |   |       |        |                                               |          |
|-----|------|-------------------------------------------------------------------------------------------------------------------------------------------------------------------------------------------------------------------------------------------------------------------------------------------------------------------|-----------|--------|---|---|---|-------|--------|-----------------------------------------------|----------|
| ATP | 6018 | RecName gi 1221407 :<br>49,gi 73587<br>Full=Dna 163,gi 7773<br>J 5491<br>homolog<br>subfamily<br>B<br>member<br>11;<br>AltName:<br>Full=ER-<br>associate<br>d dnaJ<br>protein 3;<br>AltName:<br>Full=ERj<br>3p;<br>AltName:<br>Full=ERd<br>j3;<br>AltName:<br>Full=ER-<br>associate<br>d Hsp40<br>co-<br>chaperon | 40,486.60 | 99.80% | 2 | 2 | 2 | 0.02% | 4.75%  | FQDLGA 3.28<br>AYEVL<br>DSEK                  | 1,771.84 |
| ATP | 6018 | RecName gi 1221407 :<br>49,gi 73587<br>Full=Dna 163,gi 7773<br>J 5491<br>homolog<br>subfamily<br>B<br>member<br>11;<br>AltName:<br>Full=ER-<br>associate<br>d dnaJ<br>protein 3;<br>AltName:<br>Full=ERj<br>3p;<br>AltName:<br>Full=ERd<br>j3;<br>AltName:<br>Full=ER-<br>associate<br>d Hsp40<br>co-<br>chaperon | 40,486.60 | 99.80% | 2 | 2 | 2 | 0.02% | 4.75%  | FQDLGA 2.81<br>AYEVL<br>DSEKR                 | 1,927.94 |
| ATP | 6018 | FXDYD gi 7577507 :<br>0,gi 777357<br>containin 53,gi 91206<br>g ion 665<br>transport<br>regulator<br>6                                                                                                                                                                                                            | 10,447.10 | 99.80% | 2 | 2 | 2 | 0.02% | 26.30% | APGDEE 3.39<br>AQVENL<br>VTANAT<br>EPQK       | 2,311.11 |
| ATP | 6018 | FXDYD gi 7577507 :<br>0,gi 777357<br>containin 53,gi 91206<br>g ion 665<br>transport<br>regulator<br>6                                                                                                                                                                                                            | 10,447.10 | 99.80% | 2 | 2 | 2 | 0.02% | 26.30% | APGDEE 5.1<br>AQVENL<br>VTANAT<br>EPQKAE<br>N | 2,625.23 |

|     |      |                                                                                      |                                        |            |         |    |    |    |       |        |                                                                  |      |          |
|-----|------|--------------------------------------------------------------------------------------|----------------------------------------|------------|---------|----|----|----|-------|--------|------------------------------------------------------------------|------|----------|
| ATP | 6018 | STT3B protein                                                                        | gi 146186621,gi 148235371              | 93,202.50  | 100.00% | 3  | 3  | 4  | 0.03% | 5.96%  | ENPPVE<br>DSSDED<br>DKRNPG<br>NLYDK                              | 2.55 | 2,633.16 |
| ATP | 6018 | STT3B protein                                                                        | gi 146186621,gi 148235371              | 93,202.50  | 100.00% | 3  | 3  | 4  | 0.03% | 5.96%  | FGEMQL<br>DFR                                                    | 2.46 | 1,158.53 |
| ATP | 6018 | STT3B protein                                                                        | gi 146186621,gi 148235371              | 93,202.50  | 100.00% | 3  | 3  | 4  | 0.03% | 5.96%  | HVTEQE<br>KTEEGL<br>GPNIK                                        | 3.74 | 1,908.97 |
| ATP | 6018 | PREDICTED: similar to Leucine-rich repeat protein SHOC-2 (Ras-binding protein Sur-8) | gi 119890707                           | 98,503.20  | 99.80%  | 2  | 2  | 2  | 0.02% | 6.84%  | DQLTRA<br>LTMIGA<br>YEIMDKI<br>TALK                              | 3.26 | 2,611.38 |
| ATP | 6018 | PREDICTED: similar to Leucine-rich repeat protein SHOC-2 (Ras-binding protein Sur-8) | gi 119890707                           | 98,503.20  | 99.80%  | 2  | 2  | 2  | 0.02% | 6.84%  | KIPPSISN<br>MVSLHV<br>LILCYNK<br>LETFPTE<br>VCTLDN<br>LR         | 2.59 | 4,117.15 |
| ATP | 6018 | Synaptotagmin 2 binding protein                                                      | gi 74354054,gi 78369420                | 15,792.00  | 99.80%  | 2  | 4  | 6  | 0.05% | 19.30% | LQEGDK<br>ILSVNGQ<br>DLK                                         | 3.62 | 1,756.94 |
| ATP | 6018 | Synaptotagmin 2 binding protein                                                      | gi 74354054,gi 78369420                | 15,792.00  | 99.80%  | 2  | 4  | 6  | 0.05% | 19.30% | NLLHQD<br>AVDLFR                                                 | 3.46 | 1,440.76 |
| ATP | 6018 | UBA1 protein                                                                         | gi 126717459,gi 156523068,gi 182702190 | 117,813.30 | 100.00% | 4  | 5  | 5  | 0.04% | 8.51%  | IYDDDDFF<br>QNLDGV<br>TNALDN<br>VDAR                             | 3.79 | 2,630.20 |
| ATP | 6018 | UBA1 protein                                                                         | gi 126717459,gi 156523068,gi 182702190 | 117,813.30 | 100.00% | 4  | 5  | 5  | 0.04% | 8.51%  | KPLLESG<br>TLGTK                                                 | 2.73 | 1,243.73 |
| ATP | 6018 | UBA1 protein                                                                         | gi 126717459,gi 156523068,gi 182702190 | 117,813.30 | 100.00% | 4  | 5  | 5  | 0.04% | 8.51%  | LAELNS<br>YVPVSA<br>YTGPLV<br>EDFLSDF<br>QVVVLT<br>NSPLED<br>QLR | 4.38 | 4,438.27 |
| ATP | 6018 | UBA1 protein                                                                         | gi 126717459,gi 156523068,gi 182702190 | 117,813.30 | 100.00% | 4  | 5  | 5  | 0.04% | 8.51%  | LAGTQP<br>LEVLEA<br>VQR                                          | 3.45 | 1,623.91 |
| ATP | 6018 | integrin alpha-V subunit                                                             | gi 11596385,gi 124056464               | 116,117.20 | 100.00% | 14 | 17 | 34 | 0.29% | 19.70% | DYAKDD<br>PLEFK                                                  | 2.1  | 1,340.64 |
| ATP | 6018 | integrin alpha-V subunit                                                             | gi 11596385,gi 124056464               | 116,117.20 | 100.00% | 14 | 17 | 34 | 0.29% | 19.70% | ENPETEE<br>DVGPPV<br>QHIELR                                      | 2.54 | 2,353.13 |

|     |      |                                                     |                                                                |            |         |    |    |    |       |        |                                                  |      |          |
|-----|------|-----------------------------------------------------|----------------------------------------------------------------|------------|---------|----|----|----|-------|--------|--------------------------------------------------|------|----------|
| ATP | 6018 | integrin<br>alpha-V<br>subunit                      | gi 1159638<br>5,gi 124056<br>464                               | 116,117.20 | 100.00% | 14 | 17 | 34 | 0.29% | 19.70% | FDLQIQS<br>SNLFDK                                | 4.16 | 1,554.78 |
| ATP | 6018 | integrin<br>alpha-V<br>subunit                      | gi 1159638<br>5,gi 124056<br>464                               | 116,117.20 | 100.00% | 14 | 17 | 34 | 0.29% | 19.70% | FDLQIQS<br>SNLFDK<br>VSPVVS<br>YK                | 4.03 | 2,414.26 |
| ATP | 6018 | integrin<br>alpha-V<br>subunit                      | gi 1159638<br>5,gi 124056<br>464                               | 116,117.20 | 100.00% | 14 | 17 | 34 | 0.29% | 19.70% | FGSAIAP<br>LGDLLDQ<br>DGFNDI<br>AIAAPY<br>GGEDK  | 3.26 | 3,037.44 |
| ATP | 6018 | integrin<br>alpha-V<br>subunit                      | gi 1159638<br>5,gi 124056<br>464                               | 116,117.20 | 100.00% | 14 | 17 | 34 | 0.29% | 19.70% | FGSAIAP<br>LGDLLDQ<br>DGFNDI<br>AIAAPY<br>GGEDKK | 6.27 | 3,165.54 |
| ATP | 6018 | integrin<br>alpha-V<br>subunit                      | gi 1159638<br>5,gi 124056<br>464                               | 116,117.20 | 100.00% | 14 | 17 | 34 | 0.29% | 19.70% | FSVHQQ<br>SEMDTS<br>VK                           | 3.98 | 1,638.74 |
| ATP | 6018 | integrin<br>alpha-V<br>subunit                      | gi 1159638<br>5,gi 124056<br>464                               | 116,117.20 | 100.00% | 14 | 17 | 34 | 0.29% | 19.70% | GATDID<br>KNGYPD<br>LIVGAFG<br>VDR               | 5.48 | 2,293.15 |
| ATP | 6018 | integrin<br>alpha-V<br>subunit                      | gi 1159638<br>5,gi 124056<br>464                               | 116,117.20 | 100.00% | 14 | 17 | 34 | 0.29% | 19.70% | GIVYIFN<br>GRPTGL<br>NAVPSQI<br>LEGK             | 3.73 | 2,543.40 |
| ATP | 6018 | integrin<br>alpha-V<br>subunit                      | gi 1159638<br>5,gi 124056<br>464                               | 116,117.20 | 100.00% | 14 | 17 | 34 | 0.29% | 19.70% | IYIGDDN<br>PLTLIVK                               | 4.53 | 1,573.88 |
| ATP | 6018 | integrin<br>alpha-V<br>subunit                      | gi 1159638<br>5,gi 124056<br>464                               | 116,117.20 | 100.00% | 14 | 17 | 34 | 0.29% | 19.70% | MFLLVG<br>APK                                    | 3.28 | 991.5647 |
| ATP | 6018 | integrin<br>alpha-V<br>subunit                      | gi 1159638<br>5,gi 124056<br>464                               | 116,117.20 | 100.00% | 14 | 17 | 34 | 0.29% | 19.70% | SSASFNV<br>IEFPYK                                | 3.64 | 1,488.74 |
| ATP | 6018 | integrin<br>alpha-V<br>subunit                      | gi 1159638<br>5,gi 124056<br>464                               | 116,117.20 | 100.00% | 14 | 17 | 34 | 0.29% | 19.70% | VRPPQE<br>EQEREQ<br>LQPHEN<br>GEGNSE<br>T        | 2.34 | 2,917.33 |
| ATP | 6018 | integrin<br>alpha-V<br>subunit                      | gi 1159638<br>5,gi 124056<br>464                               | 116,117.20 | 100.00% | 14 | 17 | 34 | 0.29% | 19.70% | YKENPE<br>TEEDVG<br>PVVQHI<br>YELR               | 4.35 | 2,644.29 |
| ATP | 6018 | RecName<br>:<br>Full=Tra<br>nsaldolas<br>e          | gi 1108164<br>39,gi 16442<br>0731,gi 836<br>38723              | 37,668.70  | 99.80%  | 2  | 2  | 2  | 0.02% | 12.20% | LSFDKD<br>AMVAR                                  | 2.25 | 1,268.63 |
| ATP | 6018 | RecName<br>:<br>Full=Tra<br>nsaldolas<br>e          | gi 1108164<br>39,gi 16442<br>0731,gi 836<br>38723              | 37,668.70  | 99.80%  | 2  | 2  | 2  | 0.02% | 12.20% | NTGEIK<br>ALAGCD<br>FLTISPQ<br>LLGELL<br>KDHSK   | 3.38 | 3,211.70 |
| ATP | 6018 | poly(A)<br>binding<br>protein,<br>cytoplas<br>mic 1 | gi 4138679<br>8,gi 471170<br>93,gi 74268<br>035,gi 8979<br>741 | 70,653.30  | 100.00% | 3  | 3  | 3  | 0.03% | 6.60%  | ALDTMN<br>FDVIK                                  | 2.65 | 1,282.64 |
| ATP | 6018 | poly(A)<br>binding<br>protein,<br>cytoplas<br>mic 1 | gi 4138679<br>8,gi 471170<br>93,gi 74268<br>035,gi 8979<br>741 | 70,653.30  | 100.00% | 3  | 3  | 3  | 0.03% | 6.60%  | IVATKPL<br>YVALAQ<br>R                           | 3.28 | 1,542.94 |

|     |      |                                                                                                            |                                                |           |         |   |   |   |       |       |                      |      |          |
|-----|------|------------------------------------------------------------------------------------------------------------|------------------------------------------------|-----------|---------|---|---|---|-------|-------|----------------------|------|----------|
| ATP | 6018 | poly(A) binding protein, cytoplasmic 1                                                                     | gi 41386798,gi 47117093,gi 74268035,gi 8979741 | 70,653.30 | 100.00% | 3 | 3 | 3 | 0.03% | 6.60% | SLGYAY VNFQQP ADAER  | 2.42 | 1,928.91 |
| ATP | 6018 | RecName: Full=Monocarboxylate transporter 1; Short=MCCT 1; AltName: Full=Solute carrier family 16 member 1 | gi 122139973,gi 77567740,gi 82617542           | 54,281.70 | 100.00% | 4 | 5 | 5 | 0.04% | 6.99% | ESKDEE TNVDVA EKPK   | 2.32 | 1,817.88 |
| ATP | 6018 | RecName: Full=Monocarboxylate transporter 1; Short=MCCT 1; AltName: Full=Solute carrier family 16 member 1 | gi 122139973,gi 77567740,gi 82617542           | 54,281.70 | 100.00% | 4 | 5 | 5 | 0.04% | 6.99% | GASDAN TDLIGG NPK    | 4.18 | 1,429.69 |
| ATP | 6018 | RecName: Full=Monocarboxylate transporter 1; Short=MCCT 1; AltName: Full=Solute carrier family 16 member 1 | gi 122139973,gi 77567740,gi 82617542           | 54,281.70 | 100.00% | 4 | 5 | 5 | 0.04% | 6.99% | GASDAN TDLIGG NPKEEK | 4.62 | 1,815.87 |

|     |      |                                                                                                                                                                      |                                                                                                                   |           |         |   |   |       |       |                                      |                                                    |          |
|-----|------|----------------------------------------------------------------------------------------------------------------------------------------------------------------------|-------------------------------------------------------------------------------------------------------------------|-----------|---------|---|---|-------|-------|--------------------------------------|----------------------------------------------------|----------|
| ATP | 6018 | RecName<br>: gi 1221399<br>Full=Mo<br>nocarbox<br>ylate<br>transport<br>er 1;<br>Short=M<br>CT 1;<br>AltName:<br>Full=Solu<br>te carrier<br>family 16<br>member<br>1 | 54,281.70                                                                                                         | 100.00%   | 4       | 5 | 5 | 0.04% | 6.99% | GASDAN 2.16<br>TDLIGG<br>NPKEEK<br>K | 1,943.97                                           |          |
| ATP | 6018 | RecName<br>: Full=L-<br>lactate<br>dehydrog<br>enase B<br>chain;<br>Short=L<br>DH-B                                                                                  | gi 1185726<br>66,gi 14874<br>4825,gi 154<br>425698,gi 2<br>7806561,gi <br>59858383,g<br>i 74353944,<br>gi 8979739 | 36,606.70 | 100.00% | 2 | 3 | 3     | 0.03% | 7.49%                                | IVADKD 4.58<br>YSVTAN<br>SK                        | 1,510.77 |
| ATP | 6018 | RecName<br>: Full=L-<br>lactate<br>dehydrog<br>enase B<br>chain;<br>Short=L<br>DH-B                                                                                  | gi 1185726<br>66,gi 14874<br>4825,gi 154<br>425698,gi 2<br>7806561,gi <br>59858383,g<br>i 74353944,<br>gi 8979739 | 36,606.70 | 100.00% | 2 | 3 | 3     | 0.03% | 7.49%                                | MVVESA 2.81<br>YEVIK                               | 1,283.66 |
| ATP | 6018 | PREDIC<br>TED:<br>similar to<br>program<br>med cell<br>death 6<br>interactin<br>g protein<br>isoform 1                                                               | gi 1199142<br>74                                                                                                  | 96,862.00 | 100.00% | 4 | 4 | 4     | 0.03% | 7.54%                                | EPSAPSI 1.87<br>PTPTYQS<br>SPAGGH<br>APTPTP<br>APR | 2,966.46 |
| ATP | 6018 | PREDIC<br>TED:<br>similar to<br>program<br>med cell<br>death 6<br>interactin<br>g protein<br>isoform 1                                                               | gi 1199142<br>74                                                                                                  | 96,862.00 | 100.00% | 4 | 4 | 4     | 0.03% | 7.54%                                | LLDEEE 3.87<br>ATDNDL<br>R                         | 1,532.71 |
| ATP | 6018 | PREDIC<br>TED:<br>similar to<br>program<br>med cell<br>death 6<br>interactin<br>g protein<br>isoform 1                                                               | gi 1199142<br>74                                                                                                  | 96,862.00 | 100.00% | 4 | 4 | 4     | 0.03% | 7.54%                                | NIQVSH 3.48<br>QEFSK                               | 1,316.66 |

|     |      |                                                                                                    |                                                                                                             |           |         |    |    |    |       |        |                                               |      |          |
|-----|------|----------------------------------------------------------------------------------------------------|-------------------------------------------------------------------------------------------------------------|-----------|---------|----|----|----|-------|--------|-----------------------------------------------|------|----------|
| ATP | 6018 | PREDICTED:<br>similar to<br>program<br>med cell<br>death 6<br>interactin<br>g protein<br>isoform 1 | gi 119914274                                                                                                | 96,862.00 | 100.00% | 4  | 4  | 4  | 0.03% | 7.54%  | TMQGSE<br>VVNVLK                              | 3.65 | 1,320.68 |
| ATP | 6018 | ACTR2<br>protein                                                                                   | gi 154425680,gi 156121073,gi 17943200,gi 182627520,gi 56966173,gi 56966193                                  | 44,743.70 | 99.80%  | 2  | 2  | 2  | 0.02% | 6.09%  | DLMVGD<br>EASELR                              | 3.01 | 1,350.62 |
| ATP | 6018 | ACTR2<br>protein                                                                                   | gi 154425680,gi 156121073,gi 17943200,gi 182627520,gi 56966173,gi 56966193                                  | 44,743.70 | 99.80%  | 2  | 2  | 2  | 0.02% | 6.09%  | ILLTEPP<br>MNPTK                              | 3.14 | 1,369.74 |
| ATP | 6018 | Sec61<br>alpha 1<br>subunit<br>(S.<br>cerevisiae<br>)                                              | gi 154426140,gi 59857767,gi 75060961,gi 94966817                                                            | 52,208.90 | 100.00% | 4  | 6  | 15 | 0.13% | 17.40% | GMEFEG<br>AIALFH<br>LLATR                     | 4.63 | 2,005.06 |
| ATP | 6018 | Sec61<br>alpha 1<br>subunit<br>(S.<br>cerevisiae<br>)                                              | gi 154426140,gi 59857767,gi 75060961,gi 94966817                                                            | 52,208.90 | 100.00% | 4  | 6  | 15 | 0.13% | 17.40% | GTLMEL<br>GISPIVTS<br>GLIMQL<br>LAGAK         | 4.06 | 2,529.40 |
| ATP | 6018 | Sec61<br>alpha 1<br>subunit<br>(S.<br>cerevisiae<br>)                                              | gi 154426140,gi 59857767,gi 75060961,gi 94966817                                                            | 52,208.90 | 100.00% | 4  | 6  | 15 | 0.13% | 17.40% | LFYTSNI<br>PIILQSAL<br>VSNLYVI<br>SQMLSA<br>R | 4.82 | 3,270.78 |
| ATP | 6018 | Sec61<br>alpha 1<br>subunit<br>(S.<br>cerevisiae<br>)                                              | gi 154426140,gi 59857767,gi 75060961,gi 94966817                                                            | 52,208.90 | 100.00% | 4  | 6  | 15 | 0.13% | 17.40% | YRGQYN<br>TYPIK                               | 2.79 | 1,402.71 |
| ATP | 6018 | H(+)-<br>transportin<br>g ATP<br>synthase                                                          | gi 102,gi 114402,gi 158429020,gi 158429022,gi 158431066,gi 158431067,gi 158431068,gi 158431069,gi 158431070 | 55,248.00 | 100.00% | 15 | 18 | 27 | 0.23% | 35.50% | AVDSL<br>PIGR                                 | 3.2  | 1,026.59 |

|     |      |                                           |                                                                                                                                                |           |         |    |    |    |       |        |                                         |          |
|-----|------|-------------------------------------------|------------------------------------------------------------------------------------------------------------------------------------------------|-----------|---------|----|----|----|-------|--------|-----------------------------------------|----------|
| ATP | 6018 | H(+)-<br>transporti<br>ng ATP<br>synthase | gi 102,gi 11<br>4402,gi 158<br>429020,gi 1<br>58429021,g<br>i 15842902<br>2,gi 158431<br>066,gi 1584<br>31067,gi 15<br>8431068,gi <br>27807237 | 55,248.00 | 100.00% | 15 | 18 | 27 | 0.23% | 35.50% | EVAafa 4.27<br>QFGSDL<br>DAATQQ<br>LLSR | 2,338.17 |
| ATP | 6018 | H(+)-<br>transporti<br>ng ATP<br>synthase | gi 102,gi 11<br>4402,gi 158<br>429020,gi 1<br>58429021,g<br>i 15842902<br>2,gi 158431<br>066,gi 1584<br>31067,gi 15<br>8431068,gi <br>27807237 | 55,248.00 | 100.00% | 15 | 18 | 27 | 0.23% | 35.50% | FENaFLS 2.94<br>HVISQH<br>QALLSK        | 2,169.15 |
| ATP | 6018 | H(+)-<br>transporti<br>ng ATP<br>synthase | gi 102,gi 11<br>4402,gi 158<br>429020,gi 1<br>58429021,g<br>i 15842902<br>2,gi 158431<br>066,gi 1584<br>31067,gi 15<br>8431068,gi <br>27807237 | 55,248.00 | 100.00% | 15 | 18 | 27 | 0.23% | 35.50% | GIRPAIN 2.62<br>VGLSVS<br>R             | 1,438.85 |
| ATP | 6018 | H(+)-<br>transporti<br>ng ATP<br>synthase | gi 102,gi 11<br>4402,gi 158<br>429020,gi 1<br>58429021,g<br>i 15842902<br>2,gi 158431<br>066,gi 1584<br>31067,gi 15<br>8431068,gi <br>27807237 | 55,248.00 | 100.00% | 15 | 18 | 27 | 0.23% | 35.50% | GMSLNL 4.9<br>EPDNVG<br>VVVFGN<br>DK    | 2,120.03 |
| ATP | 6018 | H(+)-<br>transporti<br>ng ATP<br>synthase | gi 102,gi 11<br>4402,gi 158<br>429020,gi 1<br>58429021,g<br>i 15842902<br>2,gi 158431<br>066,gi 1584<br>31067,gi 15<br>8431068,gi <br>27807237 | 55,248.00 | 100.00% | 15 | 18 | 27 | 0.23% | 35.50% | GYLDKL 1.94<br>EPSK                     | 1,149.62 |
| ATP | 6018 | H(+)-<br>transporti<br>ng ATP<br>synthase | gi 102,gi 11<br>4402,gi 158<br>429020,gi 1<br>58429021,g<br>i 15842902<br>2,gi 158431<br>066,gi 1584<br>31067,gi 15<br>8431068,gi <br>27807237 | 55,248.00 | 100.00% | 15 | 18 | 27 | 0.23% | 35.50% | HALIIYD 3.44<br>DLSK                    | 1,287.69 |



|     |      |                                           |                                                                                                                                                |           |         |    |    |    |       |        |                                        |          |
|-----|------|-------------------------------------------|------------------------------------------------------------------------------------------------------------------------------------------------|-----------|---------|----|----|----|-------|--------|----------------------------------------|----------|
| ATP | 6018 | H(+)-<br>transporti<br>ng ATP<br>synthase | gi 102,gi 11<br>4402,gi 158<br>429020,gi 1<br>58429021,g<br>i 15842902<br>2,gi 158431<br>066,gi 1584<br>31067,gi 15<br>8431068,gi <br>27807237 | 55,248.00 | 100.00% | 15 | 18 | 27 | 0.23% | 35.50% | ILGADTS 4.42<br>VDLEET<br>GR           | 1,575.79 |
| ATP | 6018 | H(+)-<br>transporti<br>ng ATP<br>synthase | gi 102,gi 11<br>4402,gi 158<br>429020,gi 1<br>58429021,g<br>i 15842902<br>2,gi 158431<br>066,gi 1584<br>31067,gi 15<br>8431068,gi <br>27807237 | 55,248.00 | 100.00% | 15 | 18 | 27 | 0.23% | 35.50% | ITKFENA 4.5<br>FLSHVIS<br>QHQALL<br>SK | 2,511.37 |
| ATP | 6018 | H(+)-<br>transporti<br>ng ATP<br>synthase | gi 102,gi 11<br>4402,gi 158<br>429020,gi 1<br>58429021,g<br>i 15842902<br>2,gi 158431<br>066,gi 1584<br>31067,gi 15<br>8431068,gi <br>27807237 | 55,248.00 | 100.00% | 15 | 18 | 27 | 0.23% | 35.50% | RTGAIV 2.74<br>DVPVGE<br>ELLGR         | 1,780.99 |
| ATP | 6018 | H(+)-<br>transporti<br>ng ATP<br>synthase | gi 102,gi 11<br>4402,gi 158<br>429020,gi 1<br>58429021,g<br>i 15842902<br>2,gi 158431<br>066,gi 1584<br>31067,gi 15<br>8431068,gi <br>27807237 | 55,248.00 | 100.00% | 15 | 18 | 27 | 0.23% | 35.50% | TGAIVD 4.19<br>VPVGEE<br>LLGR          | 1,624.89 |
| ATP | 6018 | H(+)-<br>transporti<br>ng ATP<br>synthase | gi 102,gi 11<br>4402,gi 158<br>429020,gi 1<br>58429021,g<br>i 15842902<br>2,gi 158431<br>066,gi 1584<br>31067,gi 15<br>8431068,gi <br>27807237 | 55,248.00 | 100.00% | 15 | 18 | 27 | 0.23% | 35.50% | TSIAIDTI 3.28<br>INQK                  | 1,316.74 |
| ATP | 6018 | H(+)-<br>transporti<br>ng ATP<br>synthase | gi 102,gi 11<br>4402,gi 158<br>429020,gi 1<br>58429021,g<br>i 15842902<br>2,gi 158431<br>066,gi 1584<br>31067,gi 15<br>8431068,gi <br>27807237 | 55,248.00 | 100.00% | 15 | 18 | 27 | 0.23% | 35.50% | VLSIGDG 2.25<br>IAR                    | 1,000.58 |

|     |      |                                                                       |                                                                                                                                                                                                   |           |         |    |    |    |       |        |                                 |          |
|-----|------|-----------------------------------------------------------------------|---------------------------------------------------------------------------------------------------------------------------------------------------------------------------------------------------|-----------|---------|----|----|----|-------|--------|---------------------------------|----------|
| ATP | 6018 | H(+)-<br>transporti<br>ng ATP<br>synthase                             | gi 102,gi 11<br>4402,gi 158<br>429020,gi 1<br>58429021,g<br>i 15842902<br>2,gi 158431<br>066,gi 1584<br>31067,gi 15<br>8431068,gi <br>27807237                                                    | 55,248.00 | 100.00% | 15 | 18 | 27 | 0.23% | 35.50% | VVDALG 3.97<br>NAIDGK           | 1,171.63 |
| ATP | 6018 | H(+)-<br>transporti<br>ng ATP<br>synthase                             | gi 102,gi 11<br>4402,gi 158<br>429020,gi 1<br>58429021,g<br>i 15842902<br>2,gi 158431<br>066,gi 1584<br>31067,gi 15<br>8431068,gi <br>27807237                                                    | 55,248.00 | 100.00% | 15 | 18 | 27 | 0.23% | 35.50% | VVDALG 4.58<br>NAIDGK<br>GPIGSK | 1,710.94 |
| ATP | 6018 | PREDIC<br>TED:<br>similar to<br>60S<br>ribosomal<br>protein<br>L9     | gi 1199043<br>84,gi 11990<br>5715,gi 164<br>420694,gi 7<br>6607197,gi <br>91207745                                                                                                                | 21,858.70 | 99.80%  | 2  | 2  | 2  | 0.02% | 15.10% | FLDGIYV 2.73<br>SEK             | 1,170.60 |
| ATP | 6018 | PREDIC<br>TED:<br>similar to<br>60S<br>ribosomal<br>protein<br>L9     | gi 1199043<br>84,gi 11990<br>5715,gi 164<br>420694,gi 7<br>6607197,gi <br>91207745                                                                                                                | 21,858.70 | 99.80%  | 2  | 2  | 2  | 0.02% | 15.10% | TILSNQT 3.4<br>VDIPENV<br>DINLK | 2,126.13 |
| ATP | 6018 | Actin<br>related<br>protein<br>2/3<br>complex,<br>subunit 4,<br>20kDa | gi 1099399<br>45,gi 11549<br>5705,gi 119<br>361249,gi 1<br>49243014,g<br>i 14924302<br>9,gi 149243<br>036,gi 1492<br>43043,gi 14<br>9243050,gi <br>149243057,<br>gi 1492430<br>64,gi 56966<br>197 | 19,649.40 | 99.80%  | 2  | 2  | 2  | 0.02% | 11.30% | AENFFIL 2.41<br>R               | 1,009.55 |
| ATP | 6018 | Actin<br>related<br>protein<br>2/3<br>complex,<br>subunit 4,<br>20kDa | gi 1099399<br>45,gi 11549<br>5705,gi 119<br>361249,gi 1<br>49243014,g<br>i 14924302<br>9,gi 149243<br>036,gi 1492<br>43043,gi 14<br>9243050,gi <br>149243057,<br>gi 1492430<br>64,gi 56966<br>197 | 19,649.40 | 99.80%  | 2  | 2  | 2  | 0.02% | 11.30% | VLIEGSI 2.98<br>NSVR            | 1,186.68 |

|     |      |                                              |                                              |           |         |   |   |    |       |        |                                                   |          |
|-----|------|----------------------------------------------|----------------------------------------------|-----------|---------|---|---|----|-------|--------|---------------------------------------------------|----------|
| ATP | 6018 | SEC22 vesicle traffickin g protein homolog B | gi 115496488,gi 74354583                     | 28,710.00 | 100.00% | 6 | 7 | 14 | 0.12% | 30.30% | IMVANIE 4.13<br>EVLQR                             | 1,430.77 |
| ATP | 6018 | SEC22 vesicle traffickin g protein homolog B | gi 115496488,gi 74354583                     | 28,710.00 | 100.00% | 6 | 7 | 14 | 0.12% | 30.30% | KLAFAY 3.58<br>LEDLHS<br>EFDEQH<br>GK             | 2,377.15 |
| ATP | 6018 | SEC22 vesicle traffickin g protein homolog B | gi 115496488,gi 74354583                     | 28,710.00 | 100.00% | 6 | 7 | 14 | 0.12% | 30.30% | NLGSINT 5.31<br>ELQDVQ<br>R                       | 1,586.81 |
| ATP | 6018 | SEC22 vesicle traffickin g protein homolog B | gi 115496488,gi 74354583                     | 28,710.00 | 100.00% | 6 | 7 | 14 | 0.12% | 30.30% | RNLGSIN 4.24<br>TELQDV<br>QR                      | 1,742.91 |
| ATP | 6018 | SEC22 vesicle traffickin g protein homolog B | gi 115496488,gi 74354583                     | 28,710.00 | 100.00% | 6 | 7 | 14 | 0.12% | 30.30% | VADGLP 4.33<br>LAASMQ<br>EDEQSG<br>R              | 1,989.92 |
| ATP | 6018 | SEC22 vesicle traffickin g protein homolog B | gi 115496488,gi 74354583                     | 28,710.00 | 100.00% | 6 | 7 | 14 | 0.12% | 30.30% | VADGLP 4.05<br>LAASMQ<br>EDEQSG<br>RDLQY<br>QSQAK | 3,179.49 |
| ATP | 6018 | GTP-binding protein (smg p21B)               | gi 163722,gi 28461271,gi 4711772,gi 74354581 | 20,806.90 | 100.00% | 5 | 7 | 10 | 0.09% | 27.70% | INVNEIF 3.89<br>YDLVR                             | 1,494.80 |
| ATP | 6018 | GTP-binding protein (smg p21B)               | gi 163722,gi 28461271,gi 4711772,gi 74354581 | 20,806.90 | 100.00% | 5 | 7 | 10 | 0.09% | 27.70% | LVVLGS 2.86<br>GGVGK                              | 985.6042 |
| ATP | 6018 | GTP-binding protein (smg p21B)               | gi 163722,gi 28461271,gi 4711772,gi 74354581 | 20,806.90 | 100.00% | 5 | 7 | 10 | 0.09% | 27.70% | SKINVNE 3.46<br>IFYDLVR                           | 1,709.92 |
| ATP | 6018 | GTP-binding protein (smg p21B)               | gi 163722,gi 28461271,gi 4711772,gi 74354581 | 20,806.90 | 100.00% | 5 | 7 | 10 | 0.09% | 27.70% | VKDTDD 4<br>VPMILV<br>GNK                         | 1,659.86 |
| ATP | 6018 | GTP-binding protein (smg p21B)               | gi 163722,gi 28461271,gi 4711772,gi 74354581 | 20,806.90 | 100.00% | 5 | 7 | 10 | 0.09% | 27.70% | YDPTIED 2.94<br>SYRK                              | 1,386.65 |
| ATP | 6018 | metadherin                                   | gi 114051299,gi 89994114                     | 64,037.90 | 100.00% | 7 | 8 | 9  | 0.08% | 14.60% | EEAAAA 3.6<br>APAPAA<br>DDQGV<br>K                | 1,794.89 |
| ATP | 6018 | metadherin                                   | gi 114051299,gi 89994114                     | 64,037.90 | 100.00% | 7 | 8 | 9  | 0.08% | 14.60% | KREEAA 3.82<br>AAAPAP<br>AADDQ<br>VLK             | 2,079.08 |

|     |      |                                                                                                                                                        |                                                             |           |         |   |   |   |       |        |                          |      |          |
|-----|------|--------------------------------------------------------------------------------------------------------------------------------------------------------|-------------------------------------------------------------|-----------|---------|---|---|---|-------|--------|--------------------------|------|----------|
| ATP | 6018 | metadherin                                                                                                                                             | gi 114051299,gi 89994114                                    | 64,037.90 | 100.00% | 7 | 8 | 9 | 0.08% | 14.60% | LQEMLS<br>VGLGFL<br>R    | 3.16 | 1,478.80 |
| ATP | 6018 | metadherin                                                                                                                                             | gi 114051299,gi 89994114                                    | 64,037.90 | 100.00% | 7 | 8 | 9 | 0.08% | 14.60% | NKGDSH<br>LNVQVS<br>NFK  | 3.87 | 1,686.86 |
| ATP | 6018 | metadherin                                                                                                                                             | gi 114051299,gi 89994114                                    | 64,037.90 | 100.00% | 7 | 8 | 9 | 0.08% | 14.60% | TELGLED<br>LGLEPK        | 3.32 | 1,284.70 |
| ATP | 6018 | metadherin                                                                                                                                             | gi 114051299,gi 89994114                                    | 64,037.90 | 100.00% | 7 | 8 | 9 | 0.08% | 14.60% | TIEVAEE<br>EVVR          | 2.82 | 1,273.66 |
| ATP | 6018 | metadherin                                                                                                                                             | gi 114051299,gi 89994114                                    | 64,037.90 | 100.00% | 7 | 8 | 9 | 0.08% | 14.60% | TISTSDP<br>ADALIK        | 3.2  | 1,331.71 |
| ATP | 6018 | RecName<br>:<br>Full=Aconitate<br>hydratase<br>,<br>mitochondrial;<br>Short=Acconitate;<br>AltName:<br>Full=Citrate hydrolyase;<br>Flags:<br>Precursor | gi 110282935,gi 1364216,gi 27806769,gi 74268076,gi 90970312 | 85,342.00 | 99.80%  | 2 | 2 | 2 | 0.02% | 3.72%  | FKLEAP<br>DADELP<br>R    | 3.27 | 1,500.77 |
| ATP | 6018 | RecName<br>:<br>Full=Aconitate<br>hydratase<br>,<br>mitochondrial;<br>Short=Acconitate;<br>AltName:<br>Full=Citrate hydrolyase;<br>Flags:<br>Precursor | gi 110282935,gi 1364216,gi 27806769,gi 74268076,gi 90970312 | 85,342.00 | 99.80%  | 2 | 2 | 2 | 0.02% | 3.72%  | IVYGHL<br>DDPANQ<br>EIER | 4.75 | 1,868.91 |
| ATP | 6018 | RecName<br>:<br>Full=ATP<br>synthase<br>subunit g,<br>mitochondrial;<br>Short=ATPase<br>subunit g                                                      | gi 2493093,gi 74354012,gi 7579922,gi 94400870               | 11,604.00 | 100.00% | 3 | 4 | 5 | 0.04% | 37.50% | APALVN<br>AAVTYS<br>KPR  | 3.8  | 1,557.87 |

|     |      |                                                                               |                       |         |   |   |   |       |        |                          |      |          |
|-----|------|-------------------------------------------------------------------------------|-----------------------|---------|---|---|---|-------|--------|--------------------------|------|----------|
| ATP | 6018 | RecName : Full=ATP synthase subunit g, mitochondrial; Short=A TPase subunit g | gi 2493093, 11,604.00 | 100.00% | 3 | 4 | 5 | 0.04% | 37.50% | NLAEKA PALVNA AVTYSK PR  | 4.87 | 2,113.18 |
| ATP | 6018 | RecName : Full=ATP synthase subunit g, mitochondrial; Short=A TPase subunit g | gi 2493093, 11,604.00 | 100.00% | 3 | 4 | 5 | 0.04% | 37.50% | VELVPP TPAEIPT AIQSLK    | 2.62 | 2,003.14 |
| ATP | 6018 | RecName : Full=ATP synthase subunit g, mitochondrial; Short=A TPase subunit g | gi 1585085, 42,125.60 | 100.00% | 4 | 4 | 4 | 0.03% | 19.20% | DTILQLN LK               | 2.48 | 1,057.63 |
| ATP | 6018 | RecName : Full=ATP synthase subunit g, mitochondrial; Short=A TPase subunit g | gi 1585085, 42,125.60 | 100.00% | 4 | 4 | 4 | 0.03% | 19.20% | LLLLGT GESGK             | 3.11 | 1,087.64 |
| ATP | 6018 | RecName : Full=ATP synthase subunit g, mitochondrial; Short=A TPase subunit g | gi 1585085, 42,125.60 | 100.00% | 4 | 4 | 4 | 0.03% | 19.20% | VADPAY LPTQQD VLR        | 3.86 | 1,685.89 |
| ATP | 6018 | RecName : Full=ATP synthase subunit g, mitochondrial; Short=A TPase subunit g | gi 1585085, 42,125.60 | 100.00% | 4 | 4 | 4 | 0.03% | 19.20% | VPTTGII EYPFDL QSVIFR    | 4.59 | 2,195.17 |
| ATP | 6018 | RecName : Full=ATP synthase subunit g, mitochondrial; Short=A TPase subunit g | gi 1585085, 42,125.60 | 100.00% | 4 | 4 | 4 | 0.03% | 19.20% | VRVPTT GII EYPFDL QSVIFR | 4.31 | 2,450.34 |

|     |      |                                                                                                                                         |            |           |         |   |   |   |       |        |                           |      |          |
|-----|------|-----------------------------------------------------------------------------------------------------------------------------------------|------------|-----------|---------|---|---|---|-------|--------|---------------------------|------|----------|
| ATP | 6018 | guanine nucleotide binding protein (G protein), q polypeptide                                                                           | gi 1585085 | 42,125.60 | 100.00% | 4 | 4 | 4 | 0.03% | 19.20% | VSAFEN<br>PYVDAI<br>K     | 3.17 | 1,452.74 |
| ATP | 6018 | PREDICTED: similar to CDW92 antigen isoform 1                                                                                           | gi 1199009 | 72,875.80 | 100.00% | 4 | 4 | 4 | 0.03% | 8.23%  | LPVPAS<br>APIPFFH<br>R    | 3.47 | 1,548.87 |
| ATP | 6018 | PREDICTED: similar to CDW92 antigen isoform 1                                                                                           | gi 1199009 | 72,875.80 | 100.00% | 4 | 4 | 4 | 0.03% | 8.23%  | NAELEAI<br>PNSGMD<br>HTHR | 2.7  | 1,907.87 |
| ATP | 6018 | PREDICTED: similar to CDW92 antigen isoform 1                                                                                           | gi 1199009 | 72,875.80 | 100.00% | 4 | 4 | 4 | 0.03% | 8.23%  | NLPFTPI<br>LASVNR         | 3.03 | 1,441.82 |
| ATP | 6018 | PREDICTED: similar to CDW92 antigen isoform 1                                                                                           | gi 1199009 | 72,875.80 | 100.00% | 4 | 4 | 4 | 0.03% | 8.23%  | VLMEFV<br>ENSR            | 3.58 | 1,239.60 |
| ATP | 6018 | RecName: Full=60S ribosomal protein L7a                                                                                                 | gi 1088609 | 30,008.40 | 99.80%  | 2 | 2 | 3 | 0.03% | 10.20% | LKVPPAI<br>NQFTQA<br>LDR  | 4.91 | 1,811.02 |
| ATP | 6018 | RecName: Full=60S ribosomal protein L7a                                                                                                 | gi 1088609 | 30,008.40 | 99.80%  | 2 | 2 | 3 | 0.03% | 10.20% | NFGIGQ<br>DIQPK           | 2.7  | 1,216.63 |
| ATP | 6018 | RecName: Full=Tra nsgelin; AltName: Full=Smoth muscle protein 22-alpha; Short=S M22-alpha; AltName: Full=25 kDa F-actin-binding protein | gi 1099403 | 22,580.80 | 100.00% | 4 | 5 | 5 | 0.04% | 27.90% | EFTESQL<br>QEGK           | 2.49 | 1,295.61 |

|     |      |                                                                                                                                                                                                                                         |           |         |   |   |   |       |        |                                               |          |
|-----|------|-----------------------------------------------------------------------------------------------------------------------------------------------------------------------------------------------------------------------------------------|-----------|---------|---|---|---|-------|--------|-----------------------------------------------|----------|
| ATP | 6018 | RecName gi 1099403 :<br>20,gi 11405<br>Full=Tra 1586,gi 868<br>nsgelin; 23808<br>AltName:<br>Full=Smoth<br>muscle<br>protein<br>22-alpha;<br>Short=S<br>M22-<br>alpha;<br>AltName:<br>Full=25<br>kDa F-<br>actin-<br>binding<br>protein | 22,580.80 | 100.00% | 4 | 5 | 5 | 0.04% | 27.90% | LVNSLY 3.9<br>PDGSKP<br>VKVPEN<br>PPSMVF<br>K | 2,758.45 |
| ATP | 6018 | RecName gi 1099403 :<br>20,gi 11405<br>Full=Tra 1586,gi 868<br>nsgelin; 23808<br>AltName:<br>Full=Smoth<br>muscle<br>protein<br>22-alpha;<br>Short=S<br>M22-<br>alpha;<br>AltName:<br>Full=25<br>kDa F-<br>actin-<br>binding<br>protein | 22,580.80 | 100.00% | 4 | 5 | 5 | 0.04% | 27.90% | TDMFQT 2.67<br>VDLFEG<br>K                    | 1,546.71 |
| ATP | 6018 | RecName gi 1099403 :<br>20,gi 11405<br>Full=Tra 1586,gi 868<br>nsgelin; 23808<br>AltName:<br>Full=Smoth<br>muscle<br>protein<br>22-alpha;<br>Short=S<br>M22-<br>alpha;<br>AltName:<br>Full=25<br>kDa F-<br>actin-<br>binding<br>protein | 22,580.80 | 100.00% | 4 | 5 | 5 | 0.04% | 27.90% | TDMFQT 2.89<br>VDLFEG<br>KDAAV<br>QR          | 2,300.12 |

|     |      |                                                                                                                                                                                             |                                                  |           |         |   |   |   |       |        |                          |      |          |
|-----|------|---------------------------------------------------------------------------------------------------------------------------------------------------------------------------------------------|--------------------------------------------------|-----------|---------|---|---|---|-------|--------|--------------------------|------|----------|
| ATP | 6018 | RecName<br>:<br>Full=Euk<br>aryotic<br>initiation<br>factor 4A-<br>I;<br>Short=el<br>F-4A-I;<br>Short=el<br>F4A-I;<br>AltName:<br>Full=AT<br>P-<br>dependen<br>t RNA<br>helicase<br>eIF4A-1 | gi 1098924<br>71.gi 74268<br>155.gi 7773<br>5407 | 46,137.30 | 100.00% | 6 | 8 | 8 | 0.07% | 22.20% | GFKDQI<br>YDIFQK         | 4.17 | 1,501.77 |
| ATP | 6018 | RecName<br>:<br>Full=Euk<br>aryotic<br>initiation<br>factor 4A-<br>I;<br>Short=el<br>F-4A-I;<br>Short=el<br>F4A-I;<br>AltName:<br>Full=AT<br>P-<br>dependen<br>t RNA<br>helicase<br>eIF4A-1 | gi 1098924<br>71.gi 74268<br>155.gi 7773<br>5407 | 46,137.30 | 100.00% | 6 | 8 | 8 | 0.07% | 22.20% | GIYAYG<br>FEKPSAI<br>QQR | 5.13 | 1,827.94 |
| ATP | 6018 | RecName<br>:<br>Full=Euk<br>aryotic<br>initiation<br>factor 4A-<br>I;<br>Short=el<br>F-4A-I;<br>Short=el<br>F4A-I;<br>AltName:<br>Full=AT<br>P-<br>dependen<br>t RNA<br>helicase<br>eIF4A-1 | gi 1098924<br>71.gi 74268<br>155.gi 7773<br>5407 | 46,137.30 | 100.00% | 6 | 8 | 8 | 0.07% | 22.20% | GYDVIA<br>QAQSGT<br>GK   | 4.05 | 1,394.69 |



|     |      |                                                                                                                                                                                             |                                                    |           |         |   |   |   |       |        |                                     |      |          |
|-----|------|---------------------------------------------------------------------------------------------------------------------------------------------------------------------------------------------|----------------------------------------------------|-----------|---------|---|---|---|-------|--------|-------------------------------------|------|----------|
| ATP | 6018 | RecName<br>:<br>Full=Euk<br>aryotic<br>initiation<br>factor 4A-<br>I;<br>Short=el<br>F-4A-I;<br>Short=el<br>F4A-I;<br>AltName:<br>Full=AT<br>P-<br>dependen<br>t RNA<br>helicase<br>eIF4A-1 | gi 1098924<br>71.gi 74268<br>155.gi 7773<br>5407   | 46,137.30 | 100.00% | 6 | 8 | 8 | 0.07% | 22.20% | LNSNTQ<br>VVLLSA<br>TMPSDV<br>LEVTK | 3.78 | 2,475.30 |
| ATP | 6018 | RecName<br>:<br>Full=Euk<br>aryotic<br>initiation<br>factor 4A-<br>I;<br>Short=el<br>F-4A-I;<br>Short=el<br>F4A-I;<br>AltName:<br>Full=AT<br>P-<br>dependen<br>t RNA<br>helicase<br>eIF4A-1 | gi 1098924<br>71.gi 74268<br>155.gi 7773<br>5407   | 46,137.30 | 100.00% | 6 | 8 | 8 | 0.07% | 22.20% | LQMEAP<br>HIIVGTP<br>GR             | 3.24 | 1,634.87 |
| ATP | 6018 | RecName<br>:<br>Full=Euk<br>aryotic<br>initiation<br>factor 4A-<br>I;<br>Short=el<br>F-4A-I;<br>Short=el<br>F4A-I;<br>AltName:<br>Full=AT<br>P-<br>dependen<br>t RNA<br>helicase<br>eIF4A-1 | gi 1098924<br>71.gi 74268<br>155.gi 7773<br>5407   | 46,137.30 | 100.00% | 6 | 8 | 8 | 0.07% | 22.20% | VLITTDL<br>LAR                      | 3.12 | 1,114.68 |
| ATP | 6018 | CDGSH<br>iron<br>sulfur<br>domain 2                                                                                                                                                         | gi 1155454<br>22.gi 12213<br>1734.gi 122<br>692399 | 15,260.70 | 99.80%  | 2 | 2 | 2 | 0.02% | 9.63%  | LPVPESI<br>TGFAR                    | 2.29 | 1,286.71 |
| ATP | 6018 | CDGSH<br>iron<br>sulfur<br>domain 2                                                                                                                                                         | gi 1155454<br>22.gi 12213<br>1734.gi 122<br>692399 | 15,260.70 | 99.80%  | 2 | 2 | 2 | 0.02% | 9.63%  | RLVPES<br>ITGFAR                    | 2.73 | 1,442.81 |

|     |      |                                                                                                                                                          |                                                   |           |         |   |    |    |       |        |                                                        |          |
|-----|------|----------------------------------------------------------------------------------------------------------------------------------------------------------|---------------------------------------------------|-----------|---------|---|----|----|-------|--------|--------------------------------------------------------|----------|
| ATP | 6018 | RecName<br>:<br>Full=Mit<br>ochondri<br>al Rho<br>GTPase<br>I;<br>Short=MI<br>RO-1;<br>AltName:<br>Full=Ras<br>homolog<br>gene<br>family<br>member<br>T1 | gi 1088607<br>95,gi 11405<br>1724,gi 886<br>82961 | 72,061.70 | 100.00% | 3 | 4  | 4  | 0.03% | 10.10% | ISDQDN 4.4<br>DGTLND<br>AELNFF<br>QR                   | 2,312.04 |
| ATP | 6018 | RecName<br>:<br>Full=Mit<br>ochondri<br>al Rho<br>GTPase<br>I;<br>Short=MI<br>RO-1;<br>AltName:<br>Full=Ras<br>homolog<br>gene<br>family<br>member<br>T1 | gi 1088607<br>95,gi 11405<br>1724,gi 886<br>82961 | 72,061.70 | 100.00% | 3 | 4  | 4  | 0.03% | 10.10% | NISELFY 3.32<br>YAQK                                   | 1,375.69 |
| ATP | 6018 | RecName<br>:<br>Full=Mit<br>ochondri<br>al Rho<br>GTPase<br>I;<br>Short=MI<br>RO-1;<br>AltName:<br>Full=Ras<br>homolog<br>gene<br>family<br>member<br>T1 | gi 1088607<br>95,gi 11405<br>1724,gi 886<br>82961 | 72,061.70 | 100.00% | 3 | 4  | 4  | 0.03% | 10.10% | TSLIMSL 2.96<br>VSEEFPE<br>EVPPRA<br>EEDITPA<br>DVTPER | 3,697.85 |
| ATP | 6018 | TMPO<br>protein                                                                                                                                          | gi 1461868<br>41,gi 14790<br>2328                 | 42,927.20 | 100.00% | 8 | 12 | 15 | 0.13% | 27.20% | DVYVQL 3.74<br>YLQHLT<br>AR                            | 1,718.92 |
| ATP | 6018 | TMPO<br>protein                                                                                                                                          | gi 1461868<br>41,gi 14790<br>2328                 | 42,927.20 | 100.00% | 8 | 12 | 15 | 0.13% | 27.20% | GAAGRPL 2.06<br>LELSDFR                                | 1,388.73 |
| ATP | 6018 | TMPO<br>protein                                                                                                                                          | gi 1461868<br>41,gi 14790<br>2328                 | 42,927.20 | 100.00% | 8 | 12 | 15 | 0.13% | 27.20% | GPPDFSS 5.6<br>DEEREP<br>TPVLGS<br>GAAVAG<br>R         | 2,598.24 |
| ATP | 6018 | TMPO<br>protein                                                                                                                                          | gi 1461868<br>41,gi 14790<br>2328                 | 42,927.20 | 100.00% | 8 | 12 | 15 | 0.13% | 27.20% | HAAPILP 3.36<br>ITEFSDIP<br>R                          | 1,776.96 |
| ATP | 6018 | TMPO<br>protein                                                                                                                                          | gi 1461868<br>41,gi 14790<br>2328                 | 42,927.20 | 100.00% | 8 | 12 | 15 | 0.13% | 27.20% | LKSELV 6.01<br>ANNVTL<br>PAGEQR                        | 1,939.06 |

|     |      |                           |                                   |            |         |    |    |    |       |        |                                                 |          |
|-----|------|---------------------------|-----------------------------------|------------|---------|----|----|----|-------|--------|-------------------------------------------------|----------|
| ATP | 6018 | TMPO<br>protein           | gi 1461868<br>41.gi 14790<br>2328 | 42,927.20  | 100.00% | 8  | 12 | 15 | 0.13% | 27.20% | LKSELV 4.17<br>ANNVTL<br>PAGEQR<br>K            | 2,067.16 |
| ATP | 6018 | TMPO<br>protein           | gi 1461868<br>41.gi 14790<br>2328 | 42,927.20  | 100.00% | 8  | 12 | 15 | 0.13% | 27.20% | SELVAN 3.96<br>NVTLPA<br>GEQR                   | 1,697.88 |
| ATP | 6018 | TMPO<br>protein           | gi 1461868<br>41.gi 14790<br>2328 | 42,927.20  | 100.00% | 8  | 12 | 15 | 0.13% | 27.20% | SSTPLPT 3.64<br>ISSSVEN<br>TR                   | 1,675.85 |
| ATP | 6018 | PREDIC<br>TED:<br>talin 1 | gi 1199005<br>17                  | 269,759.80 | 100.00% | 15 | 17 | 17 | 0.15% | 9.92%  | AVSSAIA 5.77<br>QLLGEV<br>AQGNEN<br>YAGIAA<br>R | 2,573.33 |
| ATP | 6018 | PREDIC<br>TED:<br>talin 1 | gi 1199005<br>17                  | 269,759.80 | 100.00% | 15 | 17 | 17 | 0.15% | 9.92%  | GISMSSS 3.29<br>KLLLAA<br>KALSTD<br>PAAPTL<br>K | 2,571.44 |
| ATP | 6018 | PREDIC<br>TED:<br>talin 1 | gi 1199005<br>17                  | 269,759.80 | 100.00% | 15 | 17 | 17 | 0.15% | 9.92%  | GLAGAV 3.8<br>SELLR                             | 1,085.63 |
| ATP | 6018 | PREDIC<br>TED:<br>talin 1 | gi 1199005<br>17                  | 269,759.80 | 100.00% | 15 | 17 | 17 | 0.15% | 9.92%  | GVGAAA 3.72<br>TAVTQA<br>LNELLQ<br>HVR          | 2,119.16 |
| ATP | 6018 | PREDIC<br>TED:<br>talin 1 | gi 1199005<br>17                  | 269,759.80 | 100.00% | 15 | 17 | 17 | 0.15% | 9.92%  | ILAQATS 4.19<br>DLVNAI<br>K                     | 1,456.84 |
| ATP | 6018 | PREDIC<br>TED:<br>talin 1 | gi 1199005<br>17                  | 269,759.80 | 100.00% | 15 | 17 | 17 | 0.15% | 9.92%  | LAQAAQ 3.71<br>SSVATIT<br>R                     | 1,416.78 |
| ATP | 6018 | PREDIC<br>TED:<br>talin 1 | gi 1199005<br>17                  | 269,759.80 | 100.00% | 15 | 17 | 17 | 0.15% | 9.92%  | LLAALL 3.8<br>EDEGGS<br>GRPLLQ<br>AAK           | 2,122.19 |
| ATP | 6018 | PREDIC<br>TED:<br>talin 1 | gi 1199005<br>17                  | 269,759.80 | 100.00% | 15 | 17 | 17 | 0.15% | 9.92%  | LNEAAA 5.12<br>GLNQAA<br>TELVQA<br>SR           | 2,027.05 |
| ATP | 6018 | PREDIC<br>TED:<br>talin 1 | gi 1199005<br>17                  | 269,759.80 | 100.00% | 15 | 17 | 17 | 0.15% | 9.92%  | NLGTAL 2.49<br>AELR                             | 1,057.60 |
| ATP | 6018 | PREDIC<br>TED:<br>talin 1 | gi 1199005<br>17                  | 269,759.80 | 100.00% | 15 | 17 | 17 | 0.15% | 9.92%  | TLAESA 3.24<br>LQLLYT<br>AK                     | 1,521.85 |
| ATP | 6018 | PREDIC<br>TED:<br>talin 1 | gi 1199005<br>17                  | 269,759.80 | 100.00% | 15 | 17 | 17 | 0.15% | 9.92%  | TLSHQP 3.99<br>QMALLD<br>QTK                    | 1,726.88 |
| ATP | 6018 | PREDIC<br>TED:<br>talin 1 | gi 1199005<br>17                  | 269,759.80 | 100.00% | 15 | 17 | 17 | 0.15% | 9.92%  | TMLESA 3.81<br>GGLIQT<br>AR                     | 1,463.75 |
| ATP | 6018 | PREDIC<br>TED:<br>talin 1 | gi 1199005<br>17                  | 269,759.80 | 100.00% | 15 | 17 | 17 | 0.15% | 9.92%  | VLGEAM 4.08<br>TGISQNA<br>K                     | 1,434.73 |
| ATP | 6018 | PREDIC<br>TED:<br>talin 1 | gi 1199005<br>17                  | 269,759.80 | 100.00% | 15 | 17 | 17 | 0.15% | 9.92%  | VMVTN 2.5<br>VTSLLK                             | 1,220.69 |
| ATP | 6018 | PREDIC<br>TED:<br>talin 1 | gi 1199005<br>17                  | 269,759.80 | 100.00% | 15 | 17 | 17 | 0.15% | 9.92%  | VSQMAQ 4.7<br>YFEPLTL<br>AAVGAA<br>SK           | 2,198.12 |
| ATP | 6018 | SLC25A<br>12<br>protein   | gi 1515561<br>33.gi 15537<br>2111 | 74,513.90  | 100.00% | 10 | 11 | 12 | 0.10% | 21.80% | DLGLFG 2.48<br>LYK                              | 1,025.57 |
| ATP | 6018 | SLC25A<br>12<br>protein   | gi 1515561<br>33.gi 15537<br>2111 | 74,513.90  | 100.00% | 10 | 11 | 12 | 0.10% | 21.80% | FGLYLP 2.77<br>K                                | 837.487  |

|     |      |                              |                                                               |           |         |    |    |    |       |        |                                            |          |
|-----|------|------------------------------|---------------------------------------------------------------|-----------|---------|----|----|----|-------|--------|--------------------------------------------|----------|
| ATP | 6018 | SLC25A12 protein             | gi 151556133,gi 155372111                                     | 74,513.90 | 100.00% | 10 | 11 | 12 | 0.10% | 21.80% | FKPPSVA 2.86<br>VVQPK                      | 1,296.77 |
| ATP | 6018 | SLC25A12 protein             | gi 151556133,gi 155372111                                     | 74,513.90 | 100.00% | 10 | 11 | 12 | 0.10% | 21.80% | FTLGSV 3.68<br>AGAVGA<br>TAVYPID<br>LVK    | 2,149.19 |
| ATP | 6018 | SLC25A12 protein             | gi 151556133,gi 155372111                                     | 74,513.90 | 100.00% | 10 | 11 | 12 | 0.10% | 21.80% | GLIPQLI 2.52<br>GVAPEK                     | 1,334.80 |
| ATP | 6018 | SLC25A12 protein             | gi 151556133,gi 155372111                                     | 74,513.90 | 100.00% | 10 | 11 | 12 | 0.10% | 21.80% | HLNYTE 5<br>FTQFLQE<br>LQLEHA<br>R         | 2,517.25 |
| ATP | 6018 | SLC25A12 protein             | gi 151556133,gi 155372111                                     | 74,513.90 | 100.00% | 10 | 11 | 12 | 0.10% | 21.80% | IAPLAEG 3.34<br>ALPYNL<br>AELQR            | 1,939.06 |
| ATP | 6018 | SLC25A12 protein             | gi 151556133,gi 155372111                                     | 74,513.90 | 100.00% | 10 | 11 | 12 | 0.10% | 21.80% | LTLADIE 2.33<br>R                          | 930.5256 |
| ATP | 6018 | SLC25A12 protein             | gi 151556133,gi 155372111                                     | 74,513.90 | 100.00% | 10 | 11 | 12 | 0.10% | 21.80% | NIFLQYA 3.59<br>STEVDG<br>EHYMTP<br>EDFVQR | 3,005.36 |
| ATP | 6018 | SLC25A12 protein             | gi 151556133,gi 155372111                                     | 74,513.90 | 100.00% | 10 | 11 | 12 | 0.10% | 21.80% | YLGLYN 4.26<br>DPNSNP<br>K                 | 1,494.72 |
| ATP | 6018 | RecName : Full=Cytochrome b5 | gi 117806,gi 1372997,gi 15783077,gi 278066,gi 298,gi 79160196 | 15,311.60 | 100.00% | 3  | 3  | 4  | 0.03% | 34.30% | EQAGGD 2.85<br>ATENFE<br>DVGHST<br>DAR     | 2,205.93 |
| ATP | 6018 | RecName : Full=Cytochrome b5 | gi 117806,gi 1372997,gi 15783077,gi 278066,gi 298,gi 79160196 | 15,311.60 | 100.00% | 3  | 3  | 4  | 0.03% | 34.30% | FLEEHPG 2.48<br>GEEVLR                     | 1,511.75 |
| ATP | 6018 | RecName : Full=Cytochrome b5 | gi 117806,gi 1372997,gi 15783077,gi 278066,gi 298,gi 79160196 | 15,311.60 | 100.00% | 3  | 3  | 4  | 0.03% | 34.30% | TFIIGEL 3.56<br>HPDDR                      | 1,412.72 |
| ATP | 6018 | IKK interacting protein      | gi 126010633,gi 126165284,gi 193806036                        | 39,199.60 | 100.00% | 3  | 3  | 3  | 0.03% | 10.00% | LEPLVN 2.56<br>DLTLR                       | 1,282.74 |
| ATP | 6018 | IKK interacting protein      | gi 126010633,gi 126165284,gi 193806036                        | 39,199.60 | 100.00% | 3  | 3  | 3  | 0.03% | 10.00% | METSEF 3.46<br>QGLQSK                      | 1,400.64 |
| ATP | 6018 | IKK interacting protein      | gi 126010633,gi 126165284,gi 193806036                        | 39,199.60 | 100.00% | 3  | 3  | 3  | 0.03% | 10.00% | NIGDLLS 3.98<br>SSIDR                      | 1,289.67 |
| ATP | 6018 | ALDH3A2 protein              | gi 151557095,gi 156120617                                     | 54,059.30 | 100.00% | 3  | 3  | 3  | 0.03% | 7.84%  | EKDILAA 2.41<br>IGADLSK                    | 1,443.81 |
| ATP | 6018 | ALDH3A2 protein              | gi 151557095,gi 156120617                                     | 54,059.30 | 100.00% | 3  | 3  | 3  | 0.03% | 7.84%  | IAFGGE 3.01<br>MDEATR                      | 1,312.58 |
| ATP | 6018 | ALDH3A2 protein              | gi 151557095,gi 156120617                                     | 54,059.30 | 100.00% | 3  | 3  | 3  | 0.03% | 7.84%  | NADEAI 3.22<br>QFINER                      | 1,419.69 |

|     |      |                                                                     |                                                                                 |            |         |   |   |   |       |        |                                    |      |          |
|-----|------|---------------------------------------------------------------------|---------------------------------------------------------------------------------|------------|---------|---|---|---|-------|--------|------------------------------------|------|----------|
| ATP | 6018 | defender<br>against<br>cell death<br>1                              | gi 5985836<br>1,gi 739189<br>63,gi 74354<br>770,gi 7773<br>6467,gi 832<br>86811 | 12,477.50  | 99.80%  | 2 | 2 | 5 | 0.04% | 19.50% | ADFQGIS<br>PER                     | 3.07 | 1,119.54 |
| ATP | 6018 | defender<br>against<br>cell death<br>1                              | gi 5985836<br>1,gi 739189<br>63,gi 74354<br>770,gi 7773<br>6467,gi 832<br>86811 | 12,477.50  | 99.80%  | 2 | 2 | 5 | 0.04% | 19.50% | FLEEYLS<br>ATPQR                   | 3.65 | 1,453.73 |
| ATP | 6018 | heterogen<br>eous<br>nuclear<br>ribonucle<br>oprotein<br>A1         | gi 1140523<br>84,gi 17204<br>6785,gi 868<br>23844                               | 34,178.40  | 100.00% | 3 | 4 | 4 | 0.03% | 13.10% | IEVIEIM<br>TDR                     | 2.72 | 1,234.64 |
| ATP | 6018 | heterogen<br>eous<br>nuclear<br>ribonucle<br>oprotein<br>A1         | gi 1140523<br>84,gi 17204<br>6785,gi 868<br>23844                               | 34,178.40  | 100.00% | 3 | 4 | 4 | 0.03% | 13.10% | LFIGGLS<br>FETTDES<br>LR           | 4.55 | 1,784.91 |
| ATP | 6018 | heterogen<br>eous<br>nuclear<br>ribonucle<br>oprotein<br>A1         | gi 1140523<br>84,gi 17204<br>6785,gi 868<br>23844                               | 34,178.40  | 100.00% | 3 | 4 | 4 | 0.03% | 13.10% | SSGPYG<br>GGGQYF<br>AKPR           | 4.25 | 1,628.78 |
| ATP | 6018 | PREDIC<br>TED:<br>similar to<br>optic<br>atrophy 1<br>isoform<br>16 | gi 1946636<br>97                                                                | 115,574.20 | 100.00% | 6 | 6 | 6 | 0.05% | 10.60% | DFFTTGS<br>PGETAF<br>R             | 3.21 | 1,532.70 |
| ATP | 6018 | PREDIC<br>TED:<br>similar to<br>optic<br>atrophy 1<br>isoform<br>16 | gi 1946636<br>97                                                                | 115,574.20 | 100.00% | 6 | 6 | 6 | 0.05% | 10.60% | EFDLTK<br>EEDLAA<br>LRHEIEL<br>R   | 2.69 | 2,427.25 |
| ATP | 6018 | PREDIC<br>TED:<br>similar to<br>optic<br>atrophy 1<br>isoform<br>16 | gi 1946636<br>97                                                                | 115,574.20 | 100.00% | 6 | 6 | 6 | 0.05% | 10.60% | EVLEDF<br>AEDSEK                   | 2.65 | 1,410.63 |
| ATP | 6018 | PREDIC<br>TED:<br>similar to<br>optic<br>atrophy 1<br>isoform<br>16 | gi 1946636<br>97                                                                | 115,574.20 | 100.00% | 6 | 6 | 6 | 0.05% | 10.60% | GNSSESI<br>EAIRDYE<br>EEFFQNS<br>K | 4.72 | 2,579.15 |
| ATP | 6018 | PREDIC<br>TED:<br>similar to<br>optic<br>atrophy 1<br>isoform<br>16 | gi 1946636<br>97                                                                | 115,574.20 | 100.00% | 6 | 6 | 6 | 0.05% | 10.60% | MLAITA<br>NTLR                     | 2.97 | 1,119.62 |

|     |      |                                                                       |                                                         |            |         |   |   |    |       |        |                                                                |          |
|-----|------|-----------------------------------------------------------------------|---------------------------------------------------------|------------|---------|---|---|----|-------|--------|----------------------------------------------------------------|----------|
| ATP | 6018 | PREDIC TED: 97<br>similar to optic atrophy 1 isoform 16               | gi 1946636                                              | 115,574.20 | 100.00% | 6 | 6 | 6  | 0.05% | 10.60% | SLIDMYS 4.69<br>EVLDVL<br>SDYDAS<br>YNTQDH<br>LPR              | 3,275.51 |
| ATP | 6018 | PREDIC TED: 63<br>heterogeneous nuclear ribonucleoprotein M isoform 2 | gi 1198948                                              | 77,466.20  | 100.00% | 4 | 4 | 4  | 0.03% | 12.50% | AFITNIPF 3.25<br>DVK                                           | 1,264.69 |
| ATP | 6018 | PREDIC TED: 63<br>heterogeneous nuclear ribonucleoprotein M isoform 2 | gi 1198948                                              | 77,466.20  | 100.00% | 4 | 4 | 4  | 0.03% | 12.50% | GDFFPPE 3.32<br>RPQQLP<br>HGLGGI<br>GMGLGP<br>GGQPID<br>ANHNLK | 3,834.91 |
| ATP | 6018 | PREDIC TED: 63<br>heterogeneous nuclear ribonucleoprotein M isoform 2 | gi 1198948                                              | 77,466.20  | 100.00% | 4 | 4 | 4  | 0.03% | 12.50% | GNFSGS 3.15<br>FAGSFG<br>GAGGHA<br>PGVAR                       | 2,034.95 |
| ATP | 6018 | PREDIC TED: 63<br>heterogeneous nuclear ribonucleoprotein M isoform 2 | gi 1198948                                              | 77,466.20  | 100.00% | 4 | 4 | 4  | 0.03% | 12.50% | MEEESG 2.81<br>APGVPS<br>GNGAPG<br>PK                          | 1,883.84 |
| ATP | 6018 | Prostaglandin I2 (prostanoid) synthase 23                             | gi 1123623<br>85,gi 24933<br>72,gi 27806<br>107,gi 5385 | 56,613.60  | 100.00% | 7 | 9 | 13 | 0.11% | 18.40% | ELQALT 2.95<br>DAMYTN<br>LR                                    | 1,654.81 |
| ATP | 6018 | Prostaglandin I2 (prostanoid) synthase 23                             | gi 1123623<br>85,gi 24933<br>72,gi 27806<br>107,gi 5385 | 56,613.60  | 100.00% | 7 | 9 | 13 | 0.11% | 18.40% | EVVADL 3.81<br>ALPMAD<br>GR                                    | 1,472.74 |
| ATP | 6018 | Prostaglandin I2 (prostanoid) synthase 23                             | gi 1123623<br>85,gi 24933<br>72,gi 27806<br>107,gi 5385 | 56,613.60  | 100.00% | 7 | 9 | 13 | 0.11% | 18.40% | LLLFPFL 2.83<br>SPQK                                           | 1,302.78 |
| ATP | 6018 | Prostaglandin I2 (prostanoid) synthase 23                             | gi 1123623<br>85,gi 24933<br>72,gi 27806<br>107,gi 5385 | 56,613.60  | 100.00% | 7 | 9 | 13 | 0.11% | 18.40% | LLLFPFL 5.3<br>SPQKDP<br>EIYTDPE<br>VFK                        | 2,736.45 |
| ATP | 6018 | Prostaglandin I2 (prostanoid) synthase 23                             | gi 1123623<br>85,gi 24933<br>72,gi 27806<br>107,gi 5385 | 56,613.60  | 100.00% | 7 | 9 | 13 | 0.11% | 18.40% | LTAAPFI 2.67<br>TR                                             | 989.5779 |

|     |      |                                                        |                                                               |           |         |   |   |    |       |        |                                                                 |      |          |
|-----|------|--------------------------------------------------------|---------------------------------------------------------------|-----------|---------|---|---|----|-------|--------|-----------------------------------------------------------------|------|----------|
| ATP | 6018 | Prostagla<br>ndin I2<br>(prostacy<br>clin)<br>synthase | gi 1123623<br>85,gi 24933<br>72,gi 27806<br>107,gi 5385<br>23 | 56,613.60 | 100.00% | 7 | 9 | 13 | 0.11% | 18.40% | VLDSMP<br>VLDSVL<br>SESLR                                       | 3.79 | 1,875.97 |
| ATP | 6018 | Prostagla<br>ndin I2<br>(prostacy<br>clin)<br>synthase | gi 1123623<br>85,gi 24933<br>72,gi 27806<br>107,gi 5385<br>23 | 56,613.60 | 100.00% | 7 | 9 | 13 | 0.11% | 18.40% | YGFGLM<br>QPEHDV<br>PVR                                         | 2.26 | 1,760.84 |
| ATP | 6018 | tubulin,<br>beta                                       | gi 1140527<br>31,gi 14623<br>1774,gi 868<br>23832             | 49,652.60 | 100.00% | 3 | 5 | 6  | 0.05% | 39.20% | AILVDLE<br>PGTMDS<br>VR                                         | 4.42 | 1,631.83 |
| ATP | 6018 | tubulin,<br>beta                                       | gi 1140527<br>31,gi 14623<br>1774,gi 868<br>23832             | 49,652.60 | 100.00% | 3 | 5 | 6  | 0.05% | 39.20% | ALTVPE<br>LTQQVF<br>DAK                                         | 3.52 | 1,659.90 |
| ATP | 6018 | tubulin,<br>beta                                       | gi 1140527<br>31,gi 14623<br>1774,gi 868<br>23832             | 49,652.60 | 100.00% | 3 | 5 | 6  | 0.05% | 39.20% | FPGQLN<br>ADLR                                                  | 2.72 | 1,130.60 |
| ATP | 6018 | tubulin,<br>beta                                       | gi 1140527<br>31,gi 14623<br>1774,gi 868<br>23832             | 49,652.60 | 100.00% | 3 | 5 | 6  | 0.05% | 39.20% | FPGQLN<br>ADLRK                                                 | 2.7  | 1,258.69 |
| ATP | 6018 | tubulin,<br>beta                                       | gi 1140527<br>31,gi 14623<br>1774,gi 868<br>23832             | 49,652.60 | 100.00% | 3 | 5 | 6  | 0.05% | 39.20% | GHYTEG<br>AELVDS<br>VLDVVR                                      | 4.05 | 1,958.98 |
| ATP | 6018 | tubulin,<br>beta                                       | gi 1140527<br>31,gi 14623<br>1774,gi 868<br>23832             | 49,652.60 | 100.00% | 3 | 5 | 6  | 0.05% | 39.20% | GHYTEG<br>AELVDS<br>VLDVVR<br>K                                 | 4.32 | 2,087.08 |
| ATP | 6018 | tubulin,<br>beta                                       | gi 1140527<br>31,gi 14623<br>1774,gi 868<br>23832             | 49,652.60 | 100.00% | 3 | 5 | 6  | 0.05% | 39.20% | IMNTFSV<br>VPSPK                                                | 3.92 | 1,335.70 |
| ATP | 6018 | tubulin,<br>beta                                       | gi 1140527<br>31,gi 14623<br>1774,gi 868<br>23832             | 49,652.60 | 100.00% | 3 | 5 | 6  | 0.05% | 39.20% | IREEYPD<br>RIMNTFS<br>VVVSPK                                    | 2.87 | 2,394.21 |
| ATP | 6018 | tubulin,<br>beta                                       | gi 1140527<br>31,gi 14623<br>1774,gi 868<br>23832             | 49,652.60 | 100.00% | 3 | 5 | 6  | 0.05% | 39.20% | ISEQFTA<br>MFR                                                  | 2.79 | 1,245.59 |
| ATP | 6018 | tubulin,<br>beta                                       | gi 1140527<br>31,gi 14623<br>1774,gi 868<br>23832             | 49,652.60 | 100.00% | 3 | 5 | 6  | 0.05% | 39.20% | ISVYYNE<br>ATGGK                                                | 2.7  | 1,301.64 |
| ATP | 6018 | tubulin,<br>beta                                       | gi 1140527<br>31,gi 14623<br>1774,gi 868<br>23832             | 49,652.60 | 100.00% | 3 | 5 | 6  | 0.05% | 39.20% | LAVNMV<br>PFPR                                                  | 4.05 | 1,159.63 |
| ATP | 6018 | tubulin,<br>beta                                       | gi 1140527<br>31,gi 14623<br>1774,gi 868<br>23832             | 49,652.60 | 100.00% | 3 | 5 | 6  | 0.05% | 39.20% | LHFFMP<br>GFAPLTS<br>R                                          | 3.36 | 1,636.83 |
| ATP | 6018 | tubulin,<br>beta                                       | gi 1140527<br>31,gi 14623<br>1774,gi 868<br>23832             | 49,652.60 | 100.00% | 3 | 5 | 6  | 0.05% | 39.20% | VSDTVV<br>EPYNAT<br>LSVHQL<br>VENTDE<br>TYCIDNE<br>ALYDICF<br>R | 4.3  | 4,479.06 |
| ATP | 6018 | tubulin,<br>beta                                       | gi 1140527<br>31,gi 14623<br>1774,gi 868<br>23832             | 49,652.60 | 100.00% | 3 | 5 | 6  | 0.05% | 39.20% | YLTVAA<br>VFR                                                   | 2.97 | 1,039.59 |

|     |      |                                                                                                                                                                                   |                                                                             |           |         |   |   |   |       |        |                                                              |          |
|-----|------|-----------------------------------------------------------------------------------------------------------------------------------------------------------------------------------|-----------------------------------------------------------------------------|-----------|---------|---|---|---|-------|--------|--------------------------------------------------------------|----------|
| ATP | 6018 | melanom<br>a cell<br>adhesion<br>molecule                                                                                                                                         | gi 2323281                                                                  | 9,468.30  | 99.80%  | 2 | 5 | 9 | 0.08% | 22.10% | SDKLPEE 4.92<br>MGLLQG<br>SSGDK                              | 1,906.91 |
| ATP | 6018 | melanom<br>a cell<br>adhesion<br>molecule                                                                                                                                         | gi 2323281                                                                  | 9,468.30  | 99.80%  | 2 | 5 | 9 | 0.08% | 22.10% | SDKLPEE 4.21<br>MGLLQG<br>SSGDKR                             | 2,063.01 |
| ATP | 6018 | RecName<br>:<br>Full=Orni<br>thine<br>aminotra<br>nsferase,<br>mitochon<br>drial;<br>AltName:<br>Full=Orni<br>thine--<br>oxo-acid<br>aminotra<br>nsferase;<br>Flags:<br>Precursor | gi 1221409<br>:<br>25,gi 73586<br>Full=Orni<br>966,gi 7773<br>thine<br>5431 | 48,058.30 | 100.00% | 4 | 4 | 4 | 0.03% | 16.20% | GLLNAIV 2.83<br>IR                                           | 968.6252 |
| ATP | 6018 | RecName<br>:<br>Full=Orni<br>thine<br>aminotra<br>nsferase,<br>mitochon<br>drial;<br>AltName:<br>Full=Orni<br>thine--<br>oxo-acid<br>aminotra<br>nsferase;<br>Flags:<br>Precursor | gi 1221409<br>:<br>25,gi 73586<br>Full=Orni<br>966,gi 7773<br>thine<br>5431 | 48,058.30 | 100.00% | 4 | 4 | 4 | 0.03% | 16.20% | SQVDKL 2.88<br>TLTSR                                         | 1,247.70 |
| ATP | 6018 | RecName<br>:<br>Full=Orni<br>thine<br>aminotra<br>nsferase,<br>mitochon<br>drial;<br>AltName:<br>Full=Orni<br>thine--<br>oxo-acid<br>aminotra<br>nsferase;<br>Flags:<br>Precursor | gi 1221409<br>:<br>25,gi 73586<br>Full=Orni<br>966,gi 7773<br>thine<br>5431 | 48,058.30 | 100.00% | 4 | 4 | 4 | 0.03% | 16.20% | TLSAISS 3.26<br>STDPTS<br>DGFGPF<br>MPGFEE<br>PYNDLP<br>ALER | 4,021.91 |



|     |      |                                                                                                                                                                                   |                                                                |           |         |   |   |    |       |        |                                             |      |          |
|-----|------|-----------------------------------------------------------------------------------------------------------------------------------------------------------------------------------|----------------------------------------------------------------|-----------|---------|---|---|----|-------|--------|---------------------------------------------|------|----------|
| ATP | 6018 | RecName<br>:<br>Full=Orni<br>thine<br>aminotra<br>nsferase,<br>mitochon<br>drial;<br>AltName:<br>Full=Orni<br>thine--<br>oxo-acid<br>aminotra<br>nsferase;<br>Flags:<br>Precursor | gi 1221409<br>25,gi 73586<br>966,gi 7773<br>5431               | 48,058.30 | 100.00% | 4 | 4 | 4  | 0.03% | 16.20% | TVQGPP<br>SSDYIFE<br>R                      | 2.48 | 1,595.77 |
| ATP | 6018 | dihydro<br>yrimidina<br>se-like 2                                                                                                                                                 | gi 1154964<br>00,gi 19162<br>27,gi 31220<br>18,gi 88954<br>346 | 62,259.90 | 99.80%  | 2 | 2 | 2  | 0.02% | 11.00% | ILLDGIT<br>GPEGHV<br>LSRPEEV<br>EAEAVN<br>R | 3.24 | 2,900.51 |
| ATP | 6018 | dihydro<br>yrimidina<br>se-like 2                                                                                                                                                 | gi 1154964<br>00,gi 19162<br>27,gi 31220<br>18,gi 88954<br>346 | 62,259.90 | 99.80%  | 2 | 2 | 2  | 0.02% | 11.00% | MDENQF<br>VAVTST<br>NAAK                    | 3.45 | 1,741.81 |
| ATP | 6018 | dihydro<br>yrimidina<br>se-like 2                                                                                                                                                 | gi 1154964<br>00,gi 19162<br>27,gi 31220<br>18,gi 88954<br>346 | 62,259.90 | 99.80%  | 2 | 2 | 2  | 0.02% | 11.00% | NLHQSG<br>FSLSGA<br>QIDDNIP<br>R            | 3.27 | 2,169.07 |
| ATP | 6018 | RAP2B<br>protein                                                                                                                                                                  | gi 1340251<br>88,gi 15442<br>5870,gi 156<br>523174             | 20,470.40 | 99.80%  | 2 | 3 | 3  | 0.03% | 20.80% | ASVDEL<br>FAEIVR                            | 2.95 | 1,348.71 |
| ATP | 6018 | RAP2B<br>protein                                                                                                                                                                  | gi 1340251<br>88,gi 15442<br>5870,gi 156<br>523174             | 20,470.40 | 99.80%  | 2 | 3 | 3  | 0.03% | 20.80% | EIEVDSS<br>PSVLEIL<br>DTAGTE<br>QFASMR      | 5.29 | 2,840.35 |
| ATP | 6018 | RecName<br>:<br>Full=Tra<br>nsmembr<br>ane<br>protein<br>111                                                                                                                      | gi 1153118<br>72,gi 73587<br>331,gi 7805<br>0079               | 29,903.00 | 99.80%  | 2 | 2 | 2  | 0.02% | 8.43%  | LTQEQV<br>SDSQVLI<br>R                      | 3.86 | 1,615.87 |
| ATP | 6018 | RecName<br>:<br>Full=Tra<br>nsmembr<br>ane<br>protein<br>111                                                                                                                      | gi 1153118<br>72,gi 73587<br>331,gi 7805<br>0079               | 29,903.00 | 99.80%  | 2 | 2 | 2  | 0.02% | 8.43%  | VPFPLTL<br>R                                | 2.37 | 942.5772 |
| ATP | 6018 | Hemoglo<br>bin,<br>gamma 2                                                                                                                                                        | gi 1584550<br>08,gi 16033<br>3301,gi 393<br>,gi 6246049<br>4   | 15,841.20 | 100.00% | 3 | 3 | 85 | 0.73% | 30.30% | FFESFGD<br>LSSADAI<br>LGNPK                 | 2.71 | 2,014.98 |
| ATP | 6018 | Hemoglo<br>bin,<br>gamma 2                                                                                                                                                        | gi 1584550<br>08,gi 16033<br>3301,gi 393<br>,gi 6246049<br>4   | 15,841.20 | 100.00% | 3 | 3 | 85 | 0.73% | 30.30% | LLGNVL<br>VVVLAR                            | 4.3  | 1,265.83 |

|     |      |                                                         |                                                                          |            |         |    |    |    |       |        |                          |      |          |
|-----|------|---------------------------------------------------------|--------------------------------------------------------------------------|------------|---------|----|----|----|-------|--------|--------------------------|------|----------|
| ATP | 6018 | Hemoglobin, gamma 2                                     | gi 158455008,gi 160333301,gi 393,gi 62460494                             | 15,841.20  | 100.00% | 3  | 3  | 85 | 0.73% | 30.30% | VKVDEV<br>GGEALGR        | 4.01 | 1,328.72 |
| ATP | 6018 | vesicle-associated membrane protein 5                   | gi 114050717,gi 122135927,gi 86826577                                    | 12,760.30  | 99.80%  | 2  | 2  | 3  | 0.03% | 24.10% | QADEVTEIMLNN<br>FDK      | 3.61 | 1,782.82 |
| ATP | 6018 | vesicle-associated membrane protein 5                   | gi 114050717,gi 122135927,gi 86826577                                    | 12,760.30  | 99.80%  | 2  | 2  | 3  | 0.03% | 24.10% | SDQLLDMSSAFSK            | 3.53 | 1,444.66 |
| ATP | 6018 | Ribosomal protein L6                                    | gi 126717393,gi 58760432,gi 61553343,gi 61553350,gi 67461090,gi 72534798 | 32,672.90  | 99.80%  | 2  | 2  | 2  | 0.02% | 11.10% | ASITPGTILILTGR           | 3.91 | 1,525.93 |
| ATP | 6018 | Ribosomal protein L6                                    | gi 126717393,gi 58760432,gi 61553343,gi 61553350,gi 67461090,gi 72534798 | 32,672.90  | 99.80%  | 2  | 2  | 2  | 0.02% | 11.10% | QLGSGLLVLTGPLSLNR        | 3.28 | 1,738.02 |
| ATP | 6018 | PREDICTED: filamin A, alpha (actin binding protein 280) | gi 194680254                                                             | 276,424.10 | 100.00% | 20 | 22 | 23 | 0.20% | 12.40% | AFGPGLQGSAGSPAR          | 4.15 | 1,429.72 |
| ATP | 6018 | PREDICTED: filamin A, alpha (actin binding protein 280) | gi 194680254                                                             | 276,424.10 | 100.00% | 20 | 22 | 23 | 0.20% | 12.40% | ANLPQSFQVDTSK            | 3    | 1,434.72 |
| ATP | 6018 | PREDICTED: filamin A, alpha (actin binding protein 280) | gi 194680254                                                             | 276,424.10 | 100.00% | 20 | 22 | 23 | 0.20% | 12.40% | ASGPGLNTTGVPASLPVEFTIDAK | 3.9  | 2,342.22 |
| ATP | 6018 | PREDICTED: filamin A, alpha (actin binding protein 280) | gi 194680254                                                             | 276,424.10 | 100.00% | 20 | 22 | 23 | 0.20% | 12.40% | AYGPGIEPTGNMVK           | 3.27 | 1,449.70 |

|     |      |                                                                               |                  |            |         |    |    |    |       |        |                                |          |
|-----|------|-------------------------------------------------------------------------------|------------------|------------|---------|----|----|----|-------|--------|--------------------------------|----------|
| ATP | 6018 | PREDIC<br>TED:<br>filamin<br>A, alpha<br>(actin<br>binding<br>protein<br>280) | gi 1946802<br>54 | 276,424.10 | 100.00% | 20 | 22 | 23 | 0.20% | 12.40% | DVDIIDH 2.6<br>HDNTYT<br>VK    | 1,784.85 |
| ATP | 6018 | PREDIC<br>TED:<br>filamin<br>A, alpha<br>(actin<br>binding<br>protein<br>280) | gi 1946802<br>54 | 276,424.10 | 100.00% | 20 | 22 | 23 | 0.20% | 12.40% | EGPYSIS 3.44<br>VLYGDE<br>EVPR | 1,909.92 |
| ATP | 6018 | PREDIC<br>TED:<br>filamin<br>A, alpha<br>(actin<br>binding<br>protein<br>280) | gi 1946802<br>54 | 276,424.10 | 100.00% | 20 | 22 | 23 | 0.20% | 12.40% | FADQHV 3.56<br>PGSPFSV<br>K    | 1,515.76 |
| ATP | 6018 | PREDIC<br>TED:<br>filamin<br>A, alpha<br>(actin<br>binding<br>protein<br>280) | gi 1946802<br>54 | 276,424.10 | 100.00% | 20 | 22 | 23 | 0.20% | 12.40% | GAGTGG 4.5<br>LGLAVE<br>GPSEAK | 1,570.81 |
| ATP | 6018 | PREDIC<br>TED:<br>filamin<br>A, alpha<br>(actin<br>binding<br>protein<br>280) | gi 1946802<br>54 | 276,424.10 | 100.00% | 20 | 22 | 23 | 0.20% | 12.40% | IANLQT 3.49<br>DLSDGL<br>R     | 1,415.75 |
| ATP | 6018 | PREDIC<br>TED:<br>filamin<br>A, alpha<br>(actin<br>binding<br>protein<br>280) | gi 1946802<br>54 | 276,424.10 | 100.00% | 20 | 22 | 23 | 0.20% | 12.40% | LIALLEV 2.93<br>LSQK           | 1,226.77 |
| ATP | 6018 | PREDIC<br>TED:<br>filamin<br>A, alpha<br>(actin<br>binding<br>protein<br>280) | gi 1946802<br>54 | 276,424.10 | 100.00% | 20 | 22 | 23 | 0.20% | 12.40% | LPQLPIT 2.42<br>NFSR           | 1,285.73 |
| ATP | 6018 | PREDIC<br>TED:<br>filamin<br>A, alpha<br>(actin<br>binding<br>protein<br>280) | gi 1946802<br>54 | 276,424.10 | 100.00% | 20 | 22 | 23 | 0.20% | 12.40% | LTVSSLQ 3.52<br>ESGLK          | 1,261.70 |

|     |      |                                                                               |                  |            |         |    |    |    |       |        |                                           |          |
|-----|------|-------------------------------------------------------------------------------|------------------|------------|---------|----|----|----|-------|--------|-------------------------------------------|----------|
| ATP | 6018 | PREDIC<br>TED:<br>filamin<br>A, alpha<br>(actin<br>binding<br>protein<br>280) | gi 1946802<br>54 | 276,424.10 | 100.00% | 20 | 22 | 23 | 0.20% | 12.40% | RLTVSSL 3.55<br>QESGLK                    | 1,417.80 |
| ATP | 6018 | PREDIC<br>TED:<br>filamin<br>A, alpha<br>(actin<br>binding<br>protein<br>280) | gi 1946802<br>54 | 276,424.10 | 100.00% | 20 | 22 | 23 | 0.20% | 12.40% | VAQPAIT 4.5<br>DNKDG<br>VTVR              | 1,784.95 |
| ATP | 6018 | PREDIC<br>TED:<br>filamin<br>A, alpha<br>(actin<br>binding<br>protein<br>280) | gi 1946802<br>54 | 276,424.10 | 100.00% | 20 | 22 | 23 | 0.20% | 12.40% | VSGQGL 2.74<br>HEGHTF<br>EPAEFIID<br>TR   | 2,440.19 |
| ATP | 6018 | PREDIC<br>TED:<br>filamin<br>A, alpha<br>(actin<br>binding<br>protein<br>280) | gi 1946802<br>54 | 276,424.10 | 100.00% | 20 | 22 | 23 | 0.20% | 12.40% | VTAQGP 4.69<br>GLEPSG<br>NIANK            | 1,652.86 |
| ATP | 6018 | PREDIC<br>TED:<br>filamin<br>A, alpha<br>(actin<br>binding<br>protein<br>280) | gi 1946802<br>54 | 276,424.10 | 100.00% | 20 | 22 | 23 | 0.20% | 12.40% | VTVLFA 3.94<br>GQHIAK                     | 1,283.75 |
| ATP | 6018 | PREDIC<br>TED:<br>filamin<br>A, alpha<br>(actin<br>binding<br>protein<br>280) | gi 1946802<br>54 | 276,424.10 | 100.00% | 20 | 22 | 23 | 0.20% | 12.40% | VTYTPM 2.77<br>APGSYLI<br>SIK             | 1,756.92 |
| ATP | 6018 | PREDIC<br>TED:<br>filamin<br>A, alpha<br>(actin<br>binding<br>protein<br>280) | gi 1946802<br>54 | 276,424.10 | 100.00% | 20 | 22 | 23 | 0.20% | 12.40% | YGGPYH 2.76<br>IAGSPFK                    | 1,393.69 |
| ATP | 6018 | PREDIC<br>TED:<br>filamin<br>A, alpha<br>(actin<br>binding<br>protein<br>280) | gi 1946802<br>54 | 276,424.10 | 100.00% | 20 | 22 | 23 | 0.20% | 12.40% | YKGQHV 2.4<br>PGSPFQF<br>TVGPLG<br>EGGAHK | 2,595.31 |

|     |      |                                                            |                                       |            |         |    |    |    |       |        |                                        |      |          |
|-----|------|------------------------------------------------------------|---------------------------------------|------------|---------|----|----|----|-------|--------|----------------------------------------|------|----------|
| ATP | 6018 | PREDICTED:<br>filamin A, alpha (actin binding protein 280) | gi 194680254                          | 276,424.10 | 100.00% | 20 | 22 | 23 | 0.20% | 12.40% | YTPVQQ<br>GPVGIN<br>VTYGGD<br>AIPK     | 5.63 | 2,274.18 |
| ATP | 6018 | NRAS protein                                               | gi 146186548,gi 148226664             | 21,211.30  | 100.00% | 3  | 3  | 3  | 0.03% | 24.90% | QGVEDA<br>FYTLVR                       | 2.52 | 1,397.71 |
| ATP | 6018 | NRAS protein                                               | gi 146186548,gi 148226664             | 21,211.30  | 100.00% | 3  | 3  | 3  | 0.03% | 24.90% | SALTIQL<br>IQNHFV<br>DEYDPTI<br>EDSYRK | 5.09 | 3,095.53 |
| ATP | 6018 | NRAS protein                                               | gi 146186548,gi 148226664             | 21,211.30  | 100.00% | 3  | 3  | 3  | 0.03% | 24.90% | SFADINL<br>YR                          | 2.29 | 1,098.56 |
| ATP | 6018 | PI4K2A protein                                             | gi 151554868,gi 154152033             | 54,067.10  | 100.00% | 3  | 3  | 4  | 0.03% | 9.19%  | ERNEFPE<br>DPEFEA<br>VVR               | 3.95 | 1,962.92 |
| ATP | 6018 | PI4K2A protein                                             | gi 151554868,gi 154152033             | 54,067.10  | 100.00% | 3  | 3  | 4  | 0.03% | 9.19%  | ISDPNFV<br>KDLEED<br>LYELFK            | 4.32 | 2,314.15 |
| ATP | 6018 | PI4K2A protein                                             | gi 151554868,gi 154152033             | 54,067.10  | 100.00% | 3  | 3  | 4  | 0.03% | 9.19%  | LVVLDYI<br>IR                          | 2.45 | 1,103.68 |
| ATP | 6018 | synaptosomal-associated protein 23                         | gi 115496868,gi 152941114,gi 83405332 | 23,209.50  | 100.00% | 8  | 11 | 19 | 0.16% | 41.70% | ANQVTD<br>ESLESTR                      | 4.26 | 1,449.68 |
| ATP | 6018 | synaptosomal-associated protein 23                         | gi 115496868,gi 152941114,gi 83405332 | 23,209.50  | 100.00% | 8  | 11 | 19 | 0.16% | 41.70% | ANQVTD<br>ESLESTR<br>R                 | 2.9  | 1,605.78 |
| ATP | 6018 | synaptosomal-associated protein 23                         | gi 115496868,gi 152941114,gi 83405332 | 23,209.50  | 100.00% | 8  | 11 | 19 | 0.16% | 41.70% | ILGLAIE<br>SQDAGI<br>K                 | 3.5  | 1,427.81 |
| ATP | 6018 | synaptosomal-associated protein 23                         | gi 115496868,gi 152941114,gi 83405332 | 23,209.50  | 100.00% | 8  | 11 | 19 | 0.16% | 41.70% | ITNDARE<br>DEMEDN<br>LTQVGS<br>LGNLK   | 3.56 | 2,791.34 |
| ATP | 6018 | synaptosomal-associated protein 23                         | gi 115496868,gi 152941114,gi 83405332 | 23,209.50  | 100.00% | 8  | 11 | 19 | 0.16% | 41.70% | TITMLDE<br>QGEQLK                      | 3.74 | 1,521.75 |
| ATP | 6018 | synaptosomal-associated protein 23                         | gi 115496868,gi 152941114,gi 83405332 | 23,209.50  | 100.00% | 8  | 11 | 19 | 0.16% | 41.70% | TITMLDE<br>QGEQLK<br>R                 | 2.65 | 1,677.85 |
| ATP | 6018 | synaptosomal-associated protein 23                         | gi 115496868,gi 152941114,gi 83405332 | 23,209.50  | 100.00% | 8  | 11 | 19 | 0.16% | 41.70% | VTNGQP<br>QQATAG<br>AASGGY<br>IK       | 4.45 | 1,918.96 |
| ATP | 6018 | synaptosomal-associated protein 23                         | gi 115496868,gi 152941114,gi 83405332 | 23,209.50  | 100.00% | 8  | 11 | 19 | 0.16% | 41.70% | VTNGQP<br>QQATAG<br>AASGGY<br>IKR      | 4.43 | 2,075.06 |

|     |      |                                                                              |                                        |           |         |   |   |    |       |       |                                       |      |          |
|-----|------|------------------------------------------------------------------------------|----------------------------------------|-----------|---------|---|---|----|-------|-------|---------------------------------------|------|----------|
| ATP | 6018 | LBR protein                                                                  | gi 151557087,gi 154152031              | 71,240.40 | 99.80%  | 2 | 3 | 3  | 0.03% | 6.28% | APQDEL<br>SPASSG<br>NAIYDFF<br>IGR    | 4.67 | 2,355.13 |
| ATP | 6018 | LBR protein                                                                  | gi 151557087,gi 154152031              | 71,240.40 | 99.80%  | 2 | 3 | 3  | 0.03% | 6.28% | FHLSQES<br>SYIPTQY<br>SLR             | 2.61 | 2,056.01 |
| ATP | 6018 | Solute carrier family 1 (glutamate/neutral amino acid transporter), member 4 | gi 124828540,gi 126158903,gi 145566947 | 55,991.00 | 99.80%  | 2 | 2 | 2  | 0.02% | 7.17% | NLFPSNL<br>VVAAFR                     | 2.51 | 1,447.81 |
| ATP | 6018 | Solute carrier family 1 (glutamate/neutral amino acid transporter), member 4 | gi 124828540,gi 126158903,gi 145566947 | 55,991.00 | 99.80%  | 2 | 2 | 2  | 0.02% | 7.17% | SEEETSP<br>LVTHPN<br>PTGPAA<br>STPESK | 4.08 | 2,563.22 |
| ATP | 6018 | PREDICTED: ubiquitin C isoform 12                                            | gi 76638716                            | 77,556.00 | 100.00% | 4 | 7 | 26 | 0.22% | 8.12% | ESTLHL<br>VLR                         | 3.01 | 1,067.62 |
| ATP | 6018 | PREDICTED: ubiquitin C isoform 12                                            | gi 76638716                            | 77,556.00 | 100.00% | 4 | 7 | 26 | 0.22% | 8.12% | IQDKEGI<br>PPDQQR                     | 3.69 | 1,523.78 |
| ATP | 6018 | PREDICTED: ubiquitin C isoform 12                                            | gi 76638716                            | 77,556.00 | 100.00% | 4 | 7 | 26 | 0.22% | 8.12% | TITLEVE<br>PSDTIEN<br>VK              | 4.23 | 1,787.93 |
| ATP | 6018 | PREDICTED: ubiquitin C isoform 12                                            | gi 76638716                            | 77,556.00 | 100.00% | 4 | 7 | 26 | 0.22% | 8.12% | TITLEVE<br>PSDTIEN<br>VKAK            | 2.29 | 1,987.06 |
| ATP | 6018 | TPA: predicted NADPH oxidase-5                                               | gi 151427572,gi 155372001              | 86,454.40 | 100.00% | 4 | 5 | 8  | 0.07% | 8.74% | AIGLQM<br>ALDLLA<br>K                 | 4.02 | 1,372.79 |
| ATP | 6018 | TPA: predicted NADPH oxidase-5                                               | gi 151427572,gi 155372001              | 86,454.40 | 100.00% | 4 | 5 | 8  | 0.07% | 8.74% | MAALHI<br>VEVNLL<br>PSK               | 4.27 | 1,650.92 |
| ATP | 6018 | TPA: predicted NADPH oxidase-5                                               | gi 151427572,gi 155372001              | 86,454.40 | 100.00% | 4 | 5 | 8  | 0.07% | 8.74% | RPPLFHY<br>RPGDYL<br>YLNIPSI<br>AR    | 1.98 | 2,658.43 |

|     |      |                                                                                                                                                                                           |            |         |    |    |    |       |        |                                             |      |          |
|-----|------|-------------------------------------------------------------------------------------------------------------------------------------------------------------------------------------------|------------|---------|----|----|----|-------|--------|---------------------------------------------|------|----------|
| ATP | 6018 | TPA: gi 1514275<br>predicted 72.gi 15537<br>NADPH 2001<br>oxidase-5                                                                                                                       | 86,454.40  | 100.00% | 4  | 5  | 8  | 0.07% | 8.74%  | TIAGED<br>GEINLQ<br>DFKK                    | 3.81 | 1,777.90 |
| ATP | 6018 | RecName gi 1098948<br>: 69.gi 73586<br>Full=Sma 929.gi 7805<br>ll nuclear 0059<br>ribonucle<br>oprotein<br>Sm D1;<br>Short=S<br>m-D1;<br>AltName:<br>Full=snR<br>NP core<br>protein<br>D1 | 13,263.90  | 99.80%  | 2  | 4  | 6  | 0.05% | 27.70% | NREPVQ<br>LETLSIR                           | 4    | 1,554.86 |
| ATP | 6018 | RecName gi 1098948<br>: 69.gi 73586<br>Full=Sma 929.gi 7805<br>ll nuclear 0059<br>ribonucle<br>oprotein<br>Sm D1;<br>Short=S<br>m-D1;<br>AltName:<br>Full=snR<br>NP core<br>protein<br>D1 | 13,263.90  | 99.80%  | 2  | 4  | 6  | 0.05% | 27.70% | YFILPDS<br>LPLDTLL<br>VDVEPK                | 5.21 | 2,287.25 |
| ATP | 6018 | RecName gi 1221400<br>: 85.gi 74356<br>Full=Synt 383.gi 7805<br>axin-4 0061                                                                                                               | 34,382.50  | 100.00% | 3  | 3  | 5  | 0.04% | 19.20% | AIEPQKE<br>EADENY<br>NSVNTR                 | 4.84 | 2,207.02 |
| ATP | 6018 | RecName gi 1221400<br>: 85.gi 74356<br>Full=Synt 383.gi 7805<br>axin-4 0061                                                                                                               | 34,382.50  | 100.00% | 3  | 3  | 5  | 0.04% | 19.20% | QQVTIL<br>ATPLPEE<br>SMKQDL<br>QNLRDEI<br>K | 2.51 | 3,153.65 |
| ATP | 6018 | RecName gi 1221400<br>: 85.gi 74356<br>Full=Synt 383.gi 7805<br>axin-4 0061                                                                                                               | 34,382.50  | 100.00% | 3  | 3  | 5  | 0.04% | 19.20% | VALVVH<br>PGTAR                             | 2.34 | 1,119.66 |
| ATP | 6018 | PREDIC gi 7663901<br>TED: 9<br>ATPase,<br>Ca++<br>transporti<br>ng,<br>cardiac<br>muscle,<br>slow<br>twitch 2<br>isoform 1                                                                | 109,762.30 | 100.00% | 12 | 15 | 24 | 0.21% | 15.30% | AKDIVP<br>GDIVEIA<br>VGDKVP<br>ADIR         | 4.24 | 2,390.33 |

|     |      |                                                                               |            |            |         |    |    |    |       |        |                                   |      |          |
|-----|------|-------------------------------------------------------------------------------|------------|------------|---------|----|----|----|-------|--------|-----------------------------------|------|----------|
| ATP | 6018 | PREDICTED: ATPase, Ca++ transporting, cardiac muscle, slow twitch 2 isoform 1 | gi 7663901 | 109,762.30 | 100.00% | 12 | 15 | 24 | 0.21% | 15.30% | DIVPGDI<br>VEIAVG<br>DKVPAD<br>IR | 3.73 | 2,191.20 |
| ATP | 6018 | PREDICTED: ATPase, Ca++ transporting, cardiac muscle, slow twitch 2 isoform 1 | gi 7663901 | 109,762.30 | 100.00% | 12 | 15 | 24 | 0.21% | 15.30% | EEMNLE<br>DSANFIK                 | 2.4  | 1,555.69 |
| ATP | 6018 | PREDICTED: ATPase, Ca++ transporting, cardiac muscle, slow twitch 2 isoform 1 | gi 7663901 | 109,762.30 | 100.00% | 12 | 15 | 24 | 0.21% | 15.30% | ISLPVIL<br>MDETLK                 | 3.5  | 1,487.84 |
| ATP | 6018 | PREDICTED: ATPase, Ca++ transporting, cardiac muscle, slow twitch 2 isoform 1 | gi 7663901 | 109,762.30 | 100.00% | 12 | 15 | 24 | 0.21% | 15.30% | KSEIGIA<br>MGSGTA<br>VAK          | 5.25 | 1,535.81 |
| ATP | 6018 | PREDICTED: ATPase, Ca++ transporting, cardiac muscle, slow twitch 2 isoform 1 | gi 7663901 | 109,762.30 | 100.00% | 12 | 15 | 24 | 0.21% | 15.30% | LDEFGE<br>QLSK                    | 3.12 | 1,165.57 |
| ATP | 6018 | PREDICTED: ATPase, Ca++ transporting, cardiac muscle, slow twitch 2 isoform 1 | gi 7663901 | 109,762.30 | 100.00% | 12 | 15 | 24 | 0.21% | 15.30% | MNVFDT<br>ELK                     | 2.95 | 1,112.53 |



|     |      |                                                                                                                |            |            |         |    |    |    |       |        |                                          |          |
|-----|------|----------------------------------------------------------------------------------------------------------------|------------|------------|---------|----|----|----|-------|--------|------------------------------------------|----------|
| ATP | 6018 | PREDICTED: ATPase, Ca++ transporting, cardiac muscle, slow twitch 2 isoform 1                                  | gi 7663901 | 109,762.30 | 100.00% | 12 | 15 | 24 | 0.21% | 15.30% | NAENAIE 3.77<br>ALKEYE<br>PEMGK          | 2,051.96 |
| ATP | 6018 | PREDICTED: ATPase, Ca++ transporting, cardiac muscle, slow twitch 2 isoform 1                                  | gi 7663901 | 109,762.30 | 100.00% | 12 | 15 | 24 | 0.21% | 15.30% | NMLFSG 3.22<br>TNIAAG<br>K               | 1,339.67 |
| ATP | 6018 | PREDICTED: ATPase, Ca++ transporting, cardiac muscle, slow twitch 2 isoform 1                                  | gi 7663901 | 109,762.30 | 100.00% | 12 | 15 | 24 | 0.21% | 15.30% | SEIGIAM 5.34<br>GSGTAV<br>AK             | 1,407.72 |
| ATP | 6018 | PREDICTED: ATPase, Ca++ transporting, cardiac muscle, slow twitch 2 isoform 1                                  | gi 7663901 | 109,762.30 | 100.00% | 12 | 15 | 24 | 0.21% | 15.30% | TASEMV 4.32<br>LADDNF<br>STIVAAY<br>EEGR | 2,441.15 |
| ATP | 6018 | PREDICTED: ATPase, Ca++ transporting, cardiac muscle, slow twitch 2 isoform 1                                  | gi 7663901 | 109,762.30 | 100.00% | 12 | 15 | 24 | 0.21% | 15.30% | VDQSILT 3.53<br>GESVSVI<br>K             | 1,574.86 |
| ATP | 6018 | PREDICTED: similar to solute carrier family 7 (cationic amino acid transporter, y+ system), member 2 isoform 2 | gi 1946791 | 71,681.50  | 100.00% | 3  | 5  | 5  | 0.04% | 6.08%  | DEEDDD 5.41<br>EDMYSD<br>NINAAT<br>EEK   | 2,463.91 |

|     |      |                                                                                                                       |                                   |            |         |   |   |   |       |       |                                               |      |          |
|-----|------|-----------------------------------------------------------------------------------------------------------------------|-----------------------------------|------------|---------|---|---|---|-------|-------|-----------------------------------------------|------|----------|
| ATP | 6018 | PREDIC TED: 97<br>similar to solute carrier family 7 (cationic amino acid transporter, y+ system), member 2 isoform 2 | gi 1946791                        | 71,681.50  | 100.00% | 3 | 5 | 5 | 0.04% | 6.08% | HSLEGN<br>PRDEED<br>DDEDMY<br>SDNINA<br>ATEEK | 7.71 | 3,354.35 |
| ATP | 6018 | PREDIC TED: 97<br>similar to solute carrier family 7 (cationic amino acid transporter, y+ system), member 2 isoform 2 | gi 1946791                        | 71,681.50  | 100.00% | 3 | 5 | 5 | 0.04% | 6.08% | NLSLPFI<br>FHEK                               | 2.36 | 1,344.73 |
| ATP | 6018 | ENDOD 1 protein                                                                                                       | gi 1544255<br>75,gi 15652<br>3150 | 54,851.30  | 100.00% | 3 | 4 | 4 | 0.03% | 6.20% | FATLYST<br>QHR                                | 3.34 | 1,223.62 |
| ATP | 6018 | ENDOD 1 protein                                                                                                       | gi 1544255<br>75,gi 15652<br>3150 | 54,851.30  | 100.00% | 3 | 4 | 4 | 0.03% | 6.20% | ILEVVN<br>QVQDEE<br>R                         | 4.77 | 1,570.81 |
| ATP | 6018 | ENDOD 1 protein                                                                                                       | gi 1544255<br>75,gi 15652<br>3150 | 54,851.30  | 100.00% | 3 | 4 | 4 | 0.03% | 6.20% | IPVYSAF<br>R                                  | 2.17 | 952.525  |
| ATP | 6018 | PREDIC TED: 45<br>similar to hCG1980 844                                                                              | gi 1946749                        | 298,419.90 | 99.90%  | 2 | 2 | 2 | 0.02% | 0.87% | QLQPNE<br>EADYLG<br>VR                        | 3.03 | 1,631.80 |
| ATP | 6018 | PREDIC TED: 45<br>similar to hCG1980 844                                                                              | gi 1946749                        | 298,419.90 | 99.90%  | 2 | 2 | 2 | 0.02% | 0.87% | YLLTQE<br>LLR                                 | 2.76 | 1,148.67 |
| ATP | 6018 | PREDIC TED: 4<br>similar to karyopherin beta 1 isoform 2                                                              | gi 7664462                        | 97,210.30  | 100.00% | 3 | 3 | 4 | 0.03% | 5.25% | AAVENL<br>PTFLVEL<br>SR                       | 3.96 | 1,658.91 |
| ATP | 6018 | PREDIC TED: 4<br>similar to karyopherin beta 1 isoform 2                                                              | gi 7664462                        | 97,210.30  | 100.00% | 3 | 3 | 4 | 0.03% | 5.25% | LAATNA<br>LLNSLEF<br>TK                       | 4.49 | 1,605.88 |
| ATP | 6018 | PREDIC TED: 4<br>similar to karyopherin beta 1 isoform 2                                                              | gi 7664462                        | 97,210.30  | 100.00% | 3 | 3 | 4 | 0.03% | 5.25% | LLETTD<br>RPDGHQ<br>NNLR                      | 2.77 | 1,878.94 |

|     |      |                                                                  |                                                  |            |         |   |   |   |       |        |                            |      |          |
|-----|------|------------------------------------------------------------------|--------------------------------------------------|------------|---------|---|---|---|-------|--------|----------------------------|------|----------|
| ATP | 6018 | PREDIC TED: 65<br>similar to coiled-coil domain containin g 109A | gi 1199185                                       | 39,876.70  | 100.00% | 4 | 5 | 5 | 0.04% | 14.20% | DLLSHE<br>NAATLN<br>DVK    | 4.84 | 1,639.83 |
| ATP | 6018 | PREDIC TED: 65<br>similar to coiled-coil domain containin g 109A | gi 1199185                                       | 39,876.70  | 100.00% | 4 | 5 | 5 | 0.04% | 14.20% | LEDLKE<br>QLAPLE<br>K      | 4.93 | 1,525.85 |
| ATP | 6018 | PREDIC TED: 65<br>similar to coiled-coil domain containin g 109A | gi 1199185                                       | 39,876.70  | 100.00% | 4 | 5 | 5 | 0.04% | 14.20% | LRDPLQ<br>VHLPLR           | 2.21 | 1,456.87 |
| ATP | 6018 | PREDIC TED: 65<br>similar to coiled-coil domain containin g 109A | gi 1199185                                       | 39,876.70  | 100.00% | 4 | 5 | 5 | 0.04% | 14.20% | VAIYSPD<br>GVR             | 2.57 | 1,076.57 |
| ATP | 6018 | sorting and assembly machiner y compone nt 50 homolog            | gi 1140510<br>51,gi 87578<br>317,gi 9576<br>9210 | 52,025.30  | 99.80%  | 2 | 3 | 3 | 0.03% | 5.33%  | ETSYGL<br>SFFKPQP<br>GNFDR | 2.97 | 2,090.00 |
| ATP | 6018 | sorting and assembly machiner y compone nt 50 homolog            | gi 1140510<br>51,gi 87578<br>317,gi 9576<br>9210 | 52,025.30  | 99.80%  | 2 | 3 | 3 | 0.03% | 5.33%  | LPNLLG<br>R                | 2.15 | 782.4884 |
| ATP | 6018 | PREDIC TED: 53<br>similar to ephrin receptor EphA2               | gi 1198889                                       | 107,900.50 | 100.00% | 6 | 6 | 6 | 0.05% | 7.59%  | EKDGEF<br>SVLQLV<br>GMLR   | 4.16 | 1,836.95 |
| ATP | 6018 | PREDIC TED: 53<br>similar to ephrin receptor EphA2               | gi 1198889                                       | 107,900.50 | 100.00% | 6 | 6 | 6 | 0.05% | 7.59%  | FADIVSI<br>LDK             | 2.82 | 1,120.63 |
| ATP | 6018 | PREDIC TED: 53<br>similar to ephrin receptor EphA2               | gi 1198889                                       | 107,900.50 | 100.00% | 6 | 6 | 6 | 0.05% | 7.59%  | IAYSLLG<br>LK              | 2.54 | 977.6031 |

|     |      |                                             |                                                                     |            |         |   |   |   |       |        |                                    |      |          |
|-----|------|---------------------------------------------|---------------------------------------------------------------------|------------|---------|---|---|---|-------|--------|------------------------------------|------|----------|
| ATP | 6018 | PREDICTED: similar to ephrin receptor EphA2 | gi 1198889                                                          | 107,900.50 | 100.00% | 6 | 6 | 6 | 0.05% | 7.59%  | TYVDPH<br>TYEDPN<br>QAVLK          | 3.04 | 1,989.96 |
| ATP | 6018 | PREDICTED: similar to ephrin receptor EphA2 | gi 1198889                                                          | 107,900.50 | 100.00% | 6 | 6 | 6 | 0.05% | 7.59%  | VIGAGEF<br>GEVYK                   | 3.38 | 1,268.65 |
| ATP | 6018 | PREDICTED: similar to ephrin receptor EphA2 | gi 1198889                                                          | 107,900.50 | 100.00% | 6 | 6 | 6 | 0.05% | 7.59%  | YSEPPLG<br>LTR                     | 2.55 | 1,132.60 |
| ATP | 6018 | phospholipase D2                            | gi 1103318<br>71,gi 11530<br>4867,gi 115<br>496504,gi 1<br>16248582 | 105,751.20 | 99.80%  | 2 | 2 | 2 | 0.02% | 3.00%  | FAVASSP<br>APEGDS<br>R             | 3.17 | 1,390.66 |
| ATP | 6018 | phospholipase D2                            | gi 1103318<br>71,gi 11530<br>4867,gi 115<br>496504,gi 1<br>16248582 | 105,751.20 | 99.80%  | 2 | 2 | 2 | 0.02% | 3.00%  | FLEDEY<br>LLPSLGS<br>K             | 3.28 | 1,610.83 |
| ATP | 6018 | Progesterone receptor membrane component 1  | gi 1096593<br>85,gi 11549<br>5221,gi 116<br>248575,gi 7<br>689365   | 21,605.30  | 100.00% | 5 | 5 | 9 | 0.08% | 23.70% | FYGPEG<br>PYGVFA<br>GR             | 3.91 | 1,516.72 |
| ATP | 6018 | Progesterone receptor membrane component 1  | gi 1096593<br>85,gi 11549<br>5221,gi 116<br>248575,gi 7<br>689365   | 21,605.30  | 100.00% | 5 | 5 | 9 | 0.08% | 23.70% | GDQPAA<br>SDSDDD<br>EPPPLPR        | 4.28 | 1,978.86 |
| ATP | 6018 | Progesterone receptor membrane component 1  | gi 1096593<br>85,gi 11549<br>5221,gi 116<br>248575,gi 7<br>689365   | 21,605.30  | 100.00% | 5 | 5 | 9 | 0.08% | 23.70% | IVRGDQ<br>PAASDS<br>DDDEPP<br>PLPR | 3.54 | 2,347.12 |
| ATP | 6018 | Progesterone receptor membrane component 1  | gi 1096593<br>85,gi 11549<br>5221,gi 116<br>248575,gi 7<br>689365   | 21,605.30  | 100.00% | 5 | 5 | 9 | 0.08% | 23.70% | KFYGPE<br>GPYGVF<br>AGR            | 4.3  | 1,644.82 |
| ATP | 6018 | Progesterone receptor membrane component 1  | gi 1096593<br>85,gi 11549<br>5221,gi 116<br>248575,gi 7<br>689365   | 21,605.30  | 100.00% | 5 | 5 | 9 | 0.08% | 23.70% | RDFTPA<br>ELR                      | 2.95 | 1,104.58 |
| ATP | 6018 | similar to ribosomal protein L27            | gi 2818971<br>7,gi 471170<br>99,gi 74268<br>027,gi 7740<br>4275     | 15,780.40  | 100.00% | 3 | 3 | 3 | 0.03% | 24.30% | NIDDGTS<br>DRPYSH<br>ALVAGI<br>DR  | 4.31 | 2,272.10 |

|     |      |                                                                           |                                                                 |           |         |   |   |   |       |        |                                                |          |
|-----|------|---------------------------------------------------------------------------|-----------------------------------------------------------------|-----------|---------|---|---|---|-------|--------|------------------------------------------------|----------|
| ATP | 6018 | similar to<br>ribosomal<br>protein<br>L27                                 | gi 2818971<br>7,gi 471170<br>99,gi 74268<br>027,gi 7740<br>4275 | 15,780.40 | 100.00% | 3 | 3 | 3 | 0.03% | 24.30% | NIDDGTS 2.89<br>DRPYSH<br>ALVAGI<br>DRYPR      | 2,688.31 |
| ATP | 6018 | similar to<br>ribosomal<br>protein<br>L27                                 | gi 2818971<br>7,gi 471170<br>99,gi 74268<br>027,gi 7740<br>4275 | 15,780.40 | 100.00% | 3 | 3 | 3 | 0.03% | 24.30% | YSVDIPL 2.42<br>DK                             | 1,049.55 |
| ATP | 6018 | PREDIC<br>TED:<br>heat<br>shock<br>60kDa<br>protein 1<br>(chaperon<br>in) | gi 1198882<br>28                                                | 75,015.00 | 100.00% | 5 | 8 | 9 | 0.08% | 11.80% | GVMLAV 2.08<br>DAVIAEL<br>KK                   | 1,572.90 |
| ATP | 6018 | PREDIC<br>TED:<br>heat<br>shock<br>60kDa<br>protein 1<br>(chaperon<br>in) | gi 1198882<br>28                                                | 75,015.00 | 100.00% | 5 | 8 | 9 | 0.08% | 11.80% | ISSVQSI 2.99<br>VPALEIA<br>NAHR                | 1,905.06 |
| ATP | 6018 | PREDIC<br>TED:<br>heat<br>shock<br>60kDa<br>protein 1<br>(chaperon<br>in) | gi 1198882<br>28                                                | 75,015.00 | 100.00% | 5 | 8 | 9 | 0.08% | 11.80% | LVQDVA 5.97<br>NNTNEE<br>AGDGTT<br>TATVLA<br>R | 2,560.25 |
| ATP | 6018 | PREDIC<br>TED:<br>heat<br>shock<br>60kDa<br>protein 1<br>(chaperon<br>in) | gi 1198882<br>28                                                | 75,015.00 | 100.00% | 5 | 8 | 9 | 0.08% | 11.80% | TLNDEL 2.21<br>EIIEGMK<br>FDR                  | 1,938.95 |
| ATP | 6018 | PREDIC<br>TED:<br>heat<br>shock<br>60kDa<br>protein 1<br>(chaperon<br>in) | gi 1198882<br>28                                                | 75,015.00 | 100.00% | 5 | 8 | 9 | 0.08% | 11.80% | VGLQVV 2.73<br>AVK                             | 912.5877 |
| ATP | 6018 | LOC535<br>277<br>protein<br>2051                                          | gi 1515546<br>71,gi 15537                                       | 32,806.80 | 99.90%  | 2 | 2 | 3 | 0.03% | 19.40% | IQLVEEE 3.08<br>LDR                            | 1,243.65 |
| ATP | 6018 | LOC535<br>277<br>protein<br>2051                                          | gi 1515546<br>71,gi 15537                                       | 32,806.80 | 99.90%  | 2 | 2 | 3 | 0.03% | 19.40% | IQLVEEE 3.79<br>LDRAQE<br>R                    | 1,727.89 |
| ATP | 6018 | LOC535<br>277<br>protein<br>2051                                          | gi 1515546<br>71,gi 15537                                       | 32,806.80 | 99.90%  | 2 | 2 | 3 | 0.03% | 19.40% | KLVILEG 4.51<br>ELER                           | 1,298.77 |
| ATP | 6018 | LOC535<br>277<br>protein<br>2051                                          | gi 1515546<br>71,gi 15537                                       | 32,806.80 | 99.90%  | 2 | 2 | 3 | 0.03% | 19.40% | LEEAEK 3.77<br>AADESE<br>RGMK                  | 1,808.83 |
| ATP | 6018 | LOC535<br>277<br>protein<br>2051                                          | gi 1515546<br>71,gi 15537                                       | 32,806.80 | 99.90%  | 2 | 2 | 3 | 0.03% | 19.40% | RIQLVEE 2.56<br>ELDRAQ<br>ER                   | 1,883.99 |
| ATP | 6018 | LOC535<br>277<br>protein<br>2051                                          | gi 1515546<br>71,gi 15537                                       | 32,806.80 | 99.90%  | 2 | 2 | 3 | 0.03% | 19.40% | YSEKED 3.56<br>KYEEEEK                         | 1,689.79 |

|     |      |                                           |                                                                |            |         |   |    |    |       |        |                                             |      |          |
|-----|------|-------------------------------------------|----------------------------------------------------------------|------------|---------|---|----|----|-------|--------|---------------------------------------------|------|----------|
| ATP | 6018 | CYB5R3 protein                            | gi 1488774<br>41.gi 15715<br>1718.gi 162<br>941.gi 1709<br>233 | 33,973.70  | 100.00% | 9 | 14 | 30 | 0.26% | 39.30% | FALPSPE<br>HILGLPV<br>GQHIYLS<br>AR         | 4.65 | 2,515.38 |
| ATP | 6018 | CYB5R3 protein                            | gi 1488774<br>41.gi 15715<br>1718.gi 162<br>941.gi 1709<br>233 | 33,973.70  | 100.00% | 9 | 14 | 30 | 0.26% | 39.30% | GPNGLL<br>VYQ GK                            | 4.09 | 1,145.63 |
| ATP | 6018 | CYB5R3 protein                            | gi 1488774<br>41.gi 15715<br>1718.gi 162<br>941.gi 1709<br>233 | 33,973.70  | 100.00% | 9 | 14 | 30 | 0.26% | 39.30% | IDGNLVI<br>RPYTPV<br>SSDDDK<br>GFVDLVI<br>K | 5.71 | 2,975.57 |
| ATP | 6018 | CYB5R3 protein                            | gi 1488774<br>41.gi 15715<br>1718.gi 162<br>941.gi 1709<br>233 | 33,973.70  | 100.00% | 9 | 14 | 30 | 0.26% | 39.30% | IGDTIEF<br>R                                | 2.68 | 950.4943 |
| ATP | 6018 | CYB5R3 protein                            | gi 1488774<br>41.gi 15715<br>1718.gi 162<br>941.gi 1709<br>233 | 33,973.70  | 100.00% | 9 | 14 | 30 | 0.26% | 39.30% | LIDKEVI<br>SHDTR                            | 3.14 | 1,425.77 |
| ATP | 6018 | CYB5R3 protein                            | gi 1488774<br>41.gi 15715<br>1718.gi 162<br>941.gi 1709<br>233 | 33,973.70  | 100.00% | 9 | 14 | 30 | 0.26% | 39.30% | LIDKEVI<br>SHDTRR                           | 2.41 | 1,581.87 |
| ATP | 6018 | CYB5R3 protein                            | gi 1488774<br>41.gi 15715<br>1718.gi 162<br>941.gi 1709<br>233 | 33,973.70  | 100.00% | 9 | 14 | 30 | 0.26% | 39.30% | STPAITL<br>ENPDIK                           | 3.32 | 1,398.75 |
| ATP | 6018 | CYB5R3 protein                            | gi 1488774<br>41.gi 15715<br>1718.gi 162<br>941.gi 1709<br>233 | 33,973.70  | 100.00% | 9 | 14 | 30 | 0.26% | 39.30% | STPAITL<br>ENPDIKY<br>PLR                   | 4.98 | 1,928.05 |
| ATP | 6018 | CYB5R3 protein                            | gi 1488774<br>41.gi 15715<br>1718.gi 162<br>941.gi 1709<br>233 | 33,973.70  | 100.00% | 9 | 14 | 30 | 0.26% | 39.30% | SVG MIA<br>GGTGITP<br>MLQVIR                | 5.02 | 1,917.03 |
| ATP | 6018 | endothelial cell adhesion molecule        | gi 1181512<br>18.gi 11991<br>9027.gi 868<br>23868              | 41,779.80  | 100.00% | 3 | 3  | 4  | 0.03% | 14.90% | ALEEPA<br>NDIKED<br>AIAPR                   | 4.61 | 1,851.94 |
| ATP | 6018 | endothelial cell adhesion molecule        | gi 1181512<br>18.gi 11991<br>9027.gi 868<br>23868              | 41,779.80  | 100.00% | 3 | 3  | 4  | 0.03% | 14.90% | LGALTP<br>TPSLSSQ<br>VLPSPR                 | 3.16 | 1,921.08 |
| ATP | 6018 | endothelial cell adhesion molecule        | gi 1181512<br>18.gi 11991<br>9027.gi 868<br>23868              | 41,779.80  | 100.00% | 3 | 3  | 4  | 0.03% | 14.90% | SPPSSQV<br>FFAPVL<br>DAIHGSL<br>SLK         | 4.48 | 2,397.28 |
| ATP | 6018 | PREDICTED: heparan sulfate proteoglycan 2 | gi 1198889<br>79                                               | 467,987.40 | 100.00% | 9 | 10 | 11 | 0.09% | 3.17%  | FAPGDF<br>QGFALV<br>NPQR                    | 3.87 | 1,763.89 |
| ATP | 6018 | PREDICTED: heparan sulfate proteoglycan 2 | gi 1198889<br>79                                               | 467,987.40 | 100.00% | 9 | 10 | 11 | 0.09% | 3.17%  | GTLEPV<br>QRPDVV<br>LVGAGH<br>R             | 3.16 | 2,000.10 |

|     |      |                                             |                                              |            |         |   |    |    |       |        |                                    |      |          |
|-----|------|---------------------------------------------|----------------------------------------------|------------|---------|---|----|----|-------|--------|------------------------------------|------|----------|
| ATP | 6018 | PREDIC TED: heparan sulfate proteogly can 2 | gi 1198889 79                                | 467,987.40 | 100.00% | 9 | 10 | 11 | 0.09% | 3.17%  | IPGDQV VSVVFIK                     | 3.76 | 1,400.81 |
| ATP | 6018 | PREDIC TED: heparan sulfate proteogly can 2 | gi 1198889 79                                | 467,987.40 | 100.00% | 9 | 10 | 11 | 0.09% | 3.17%  | IQVVVLP GATTPP VR                  | 3.67 | 1,546.93 |
| ATP | 6018 | PREDIC TED: heparan sulfate proteogly can 2 | gi 1198889 79                                | 467,987.40 | 100.00% | 9 | 10 | 11 | 0.09% | 3.17%  | LDVEFK PLAPDG VLLFSG GK            | 4.17 | 2,102.15 |
| ATP | 6018 | PREDIC TED: heparan sulfate proteogly can 2 | gi 1198889 79                                | 467,987.40 | 100.00% | 9 | 10 | 11 | 0.09% | 3.17%  | LRPGIVQ SGGIVR                     | 3.97 | 1,351.82 |
| ATP | 6018 | PREDIC TED: heparan sulfate proteogly can 2 | gi 1198889 79                                | 467,987.40 | 100.00% | 9 | 10 | 11 | 0.09% | 3.17%  | LRSPVISI DPPSSTV QQGQDA SFK        | 6.54 | 2,557.33 |
| ATP | 6018 | PREDIC TED: heparan sulfate proteogly can 2 | gi 1198889 79                                | 467,987.40 | 100.00% | 9 | 10 | 11 | 0.09% | 3.17%  | SPVISIDP PSSTVQ QGQDAS FK          | 4.51 | 2,288.14 |
| ATP | 6018 | PREDIC TED: heparan sulfate proteogly can 2 | gi 1198889 79                                | 467,987.40 | 100.00% | 9 | 10 | 11 | 0.09% | 3.17%  | VVPYFT QTPYSFL PLPTIK              | 3.05 | 2,211.21 |
| ATP | 6018 | PREDIC TED: keratin 19 isoform 8            | gi 1946761 68                                | 51,863.50  | 99.80%  | 2 | 2  | 3  | 0.03% | 3.77%  | LASYLD KVR                         | 2.98 | 1,064.61 |
| ATP | 6018 | PREDIC TED: keratin 19 isoform 8            | gi 1946761 68                                | 51,863.50  | 99.80%  | 2 | 2  | 3  | 0.03% | 3.77%  | VLDELT LAR                         | 3.28 | 1,029.59 |
| ATP | 6018 | PTBP1 protein                               | gi 1584549 83                                | 47,010.90  | 99.80%  | 2 | 2  | 3  | 0.03% | 9.87%  | IAIPGLA GAGNSV LLVSNL NPER         | 3.5  | 2,275.28 |
| ATP | 6018 | PTBP1 protein                               | gi 1584549 83                                | 47,010.90  | 99.80%  | 2 | 2  | 3  | 0.03% | 9.87%  | IIVENLF YPVTLD VLHQIFS K           | 3.76 | 2,488.39 |
| ATP | 6018 | Transmembrane protein                       | gi 1113070 60,gi 11549 6266,gi 122 49 133514 | 46,165.40  | 99.80%  | 2 | 2  | 7  | 0.06% | 11.30% | EQYNGN FTDPSSV NEK                 | 4.06 | 1,828.80 |
| ATP | 6018 | Transmembrane protein                       | gi 1113070 60,gi 11549 6266,gi 122 49 133514 | 46,165.40  | 99.80%  | 2 | 2  | 7  | 0.06% | 11.30% | LSGAEP DDEEYQ EFEEML EHAETA QDFASR | 5.75 | 3,489.46 |

|     |      |                                                         |                                  |            |         |   |   |    |       |        |                                                 |          |
|-----|------|---------------------------------------------------------|----------------------------------|------------|---------|---|---|----|-------|--------|-------------------------------------------------|----------|
| ATP | 6018 | KRT5<br>protein                                         | gi 1461868<br>87,gi 56710<br>317 | 62,920.60  | 100.00% | 4 | 5 | 19 | 0.16% | 6.82%  | FASFIDK 1.87<br>VR                              | 1,082.60 |
| ATP | 6018 | KRT5<br>protein                                         | gi 1461868<br>87,gi 56710<br>317 | 62,920.60  | 100.00% | 4 | 5 | 19 | 0.16% | 6.82%  | LRSEIDN 3.11<br>VKK                             | 1,201.69 |
| ATP | 6018 | KRT5<br>protein                                         | gi 1461868<br>87,gi 56710<br>317 | 62,920.60  | 100.00% | 4 | 5 | 19 | 0.16% | 6.82%  | NKYEDE 3.05<br>INKR                             | 1,308.65 |
| ATP | 6018 | KRT5<br>protein                                         | gi 1461868<br>87,gi 56710<br>317 | 62,920.60  | 100.00% | 4 | 5 | 19 | 0.16% | 6.82%  | SLDLDSII 3.81<br>AEVK                           | 1,302.72 |
| ATP | 6018 | MHC<br>class I<br>antigen                               | gi 7253691<br>9                  | 40,523.80  | 99.80%  | 2 | 3 | 9  | 0.08% | 20.90% | GFMQFG 3.35<br>YDGR                             | 1,193.50 |
| ATP | 6018 | MHC<br>class I<br>antigen                               | gi 7253691<br>9                  | 40,523.80  | 99.80%  | 2 | 3 | 9  | 0.08% | 20.90% | NGEDQT 3.05<br>QDMELV<br>ETRPSG<br>DGTFAQ       | 2,698.19 |
| ATP | 6018 | MHC<br>class I<br>antigen                               | gi 7253691<br>9                  | 40,523.80  | 99.80%  | 2 | 3 | 9  | 0.08% | 20.90% | SWTAAD 4.15<br>TAAQIT<br>K                      | 1,363.69 |
| ATP | 6018 | MHC<br>class I<br>antigen                               | gi 7253691<br>9                  | 40,523.80  | 99.80%  | 2 | 3 | 9  | 0.08% | 20.90% | VQHEGL 3.86<br>QEPLTLR                          | 1,519.82 |
| ATP | 6018 | MHC<br>class I<br>antigen                               | gi 7253691<br>9                  | 40,523.80  | 99.80%  | 2 | 3 | 9  | 0.08% | 20.90% | YFSTAV 2.55<br>SRPGLG<br>EPR                    | 1,636.84 |
| ATP | 6018 | PREDIC<br>TED:<br>similar to<br>CG2943<br>CG2943-<br>PA | gi 1198889<br>13                 | 115,925.80 | 100.00% | 7 | 8 | 8  | 0.07% | 12.50% | ALVQTE 3.69<br>DHLLFL<br>QQLAGR                 | 2,165.21 |
| ATP | 6018 | PREDIC<br>TED:<br>similar to<br>CG2943<br>CG2943-<br>PA | gi 1198889<br>13                 | 115,925.80 | 100.00% | 7 | 8 | 8  | 0.07% | 12.50% | FNVEDG 2.94<br>EIVQQV<br>R                      | 1,532.77 |
| ATP | 6018 | PREDIC<br>TED:<br>similar to<br>CG2943<br>CG2943-<br>PA | gi 1198889<br>13                 | 115,925.80 | 100.00% | 7 | 8 | 8  | 0.07% | 12.50% | HLLVGL 3.9<br>PSGAILS<br>LPK                    | 1,614.99 |
| ATP | 6018 | PREDIC<br>TED:<br>similar to<br>CG2943<br>CG2943-<br>PA | gi 1198889<br>13                 | 115,925.80 | 100.00% | 7 | 8 | 8  | 0.07% | 12.50% | NFPQAA 4.81<br>LVSFATT<br>GEK                   | 1,680.86 |
| ATP | 6018 | PREDIC<br>TED:<br>similar to<br>CG2943<br>CG2943-<br>PA | gi 1198889<br>13                 | 115,925.80 | 100.00% | 7 | 8 | 8  | 0.07% | 12.50% | QLHELA 3.28<br>PSIFFYL<br>VDADQG<br>R           | 2,319.18 |
| ATP | 6018 | PREDIC<br>TED:<br>similar to<br>CG2943<br>CG2943-<br>PA | gi 1198889<br>13                 | 115,925.80 | 100.00% | 7 | 8 | 8  | 0.07% | 12.50% | RPEIPT 3.62<br>QSREEN<br>LIPYSPD<br>VQIHAE<br>R | 3,203.61 |



|     |      |                                                                                                                                                          |                                        |            |         |   |   |   |       |        |                                    |      |          |
|-----|------|----------------------------------------------------------------------------------------------------------------------------------------------------------|----------------------------------------|------------|---------|---|---|---|-------|--------|------------------------------------|------|----------|
| ATP | 6018 | PREDICTED:<br>similar to<br>CG2943-<br>CG2943-<br>PA                                                                                                     | gi 119888913                           | 115,925.80 | 100.00% | 7 | 8 | 8 | 0.07% | 12.50% | RPVLQS<br>LLLPIMD<br>QDYAK         | 3.07 | 2,116.15 |
| ATP | 6018 | SFXN3<br>protein                                                                                                                                         | gi 151554123,gi 156120541,gi 206558262 | 35,690.00  | 100.00% | 3 | 3 | 3 | 0.03% | 14.00% | AQIQEQ<br>NPSIEVV<br>YYNK          | 4.18 | 2,023.01 |
| ATP | 6018 | SFXN3<br>protein                                                                                                                                         | gi 151554123,gi 156120541,gi 206558262 | 35,690.00  | 100.00% | 3 | 3 | 3 | 0.03% | 14.00% | ELQVGIP<br>VTNEQG<br>QR            | 2.62 | 1,667.87 |
| ATP | 6018 | SFXN3<br>protein                                                                                                                                         | gi 151554123,gi 156120541,gi 206558262 | 35,690.00  | 100.00% | 3 | 3 | 3 | 0.03% | 14.00% | NLLLSG<br>AQLEAS<br>R              | 4.87 | 1,371.76 |
| ATP | 6018 | 2',5'-<br>oligoadenylate<br>synthetase 1,<br>40/46kDa                                                                                                    | gi 158454990,gi 37953332,gi 94967004   | 45,118.40  | 100.00% | 4 | 5 | 8 | 0.07% | 11.10% | LNQAVE<br>FDVLP<br>FDALGQ<br>LTK   | 5.36 | 2,289.21 |
| ATP | 6018 | 2',5'-<br>oligoadenylate<br>synthetase 1,<br>40/46kDa                                                                                                    | gi 158454990,gi 37953332,gi 94967004   | 45,118.40  | 100.00% | 4 | 5 | 8 | 0.07% | 11.10% | PRPVILD<br>PADPTG<br>NVAGK         | 2.56 | 1,816.99 |
| ATP | 6018 | 2',5'-<br>oligoadenylate<br>synthetase 1,<br>40/46kDa                                                                                                    | gi 158454990,gi 37953332,gi 94967004   | 45,118.40  | 100.00% | 4 | 5 | 8 | 0.07% | 11.10% | PVILDPA<br>DPTGNV<br>AGK           | 4.12 | 1,563.84 |
| ATP | 6018 | 2',5'-<br>oligoadenylate<br>synthetase 1,<br>40/46kDa                                                                                                    | gi 158454990,gi 37953332,gi 94967004   | 45,118.40  | 100.00% | 4 | 5 | 8 | 0.07% | 11.10% | QLAKPR<br>PVILDPA<br>DPTGNV<br>AGK | 2.79 | 2,257.27 |
| ATP | 6018 | RecName :<br>Full=Chloride<br>intracellular<br>channel<br>protein 4;<br>AltName:<br>Full=Intracellular<br>chloride<br>ion<br>channel<br>protein<br>p64H1 | gi 109877271,gi 122692293,gi 73587123  | 28,710.60  | 99.80%  | 2 | 2 | 2 | 0.02% | 14.20% | HPESNT<br>AGMDIF<br>AK             | 2.26 | 1,533.70 |

|     |      |                                                                                                                         |                                            |           |         |    |    |    |       |        |                                                     |          |
|-----|------|-------------------------------------------------------------------------------------------------------------------------|--------------------------------------------|-----------|---------|----|----|----|-------|--------|-----------------------------------------------------|----------|
| ATP | 6018 | RecName : Full=Chloride intracellular channel protein 4; AltName: Full=Intracellular chloride ion channel protein p64H1 | gi 1098772 : 71.gi 12269 2293,gi 735 87123 | 28,710.60 | 99.80%  | 2  | 2  | 2  | 0.02% | 14.20% | LDEYLN 2.74<br>SPLPDEI<br>DENSME<br>DIK             | 2,595.17 |
| ATP | 6018 | Actin, gamma 1                                                                                                          | gi 1515543 60.gi 74354 242.gi 7581 2932    | 41,775.90 | 100.00% | 14 | 24 | 76 | 0.65% | 49.60% | AVFPSIV 2.88<br>GRPR                                | 1,198.71 |
| ATP | 6018 | Actin, gamma 1                                                                                                          | gi 1515543 60.gi 74354 242.gi 7581 2932    | 41,775.90 | 100.00% | 14 | 24 | 76 | 0.65% | 49.60% | DLTDYL 2.57<br>MK                                   | 1,014.48 |
| ATP | 6018 | Actin, gamma 1                                                                                                          | gi 1515543 60.gi 74354 242.gi 7581 2932    | 41,775.90 | 100.00% | 14 | 24 | 76 | 0.65% | 49.60% | DLYANT 5.85<br>VLSGGT<br>TMYPGI<br>ADR              | 2,231.07 |
| ATP | 6018 | Actin, gamma 1                                                                                                          | gi 1515543 60.gi 74354 242.gi 7581 2932    | 41,775.90 | 100.00% | 14 | 24 | 76 | 0.65% | 49.60% | EITALAP 2.84<br>STMK                                | 1,161.62 |
| ATP | 6018 | Actin, gamma 1                                                                                                          | gi 1515543 60.gi 74354 242.gi 7581 2932    | 41,775.90 | 100.00% | 14 | 24 | 76 | 0.65% | 49.60% | FRCPEAL 3.36<br>FQPSFLG<br>MESCGI<br>HETTFN<br>SIMK | 3,436.58 |
| ATP | 6018 | Actin, gamma 1                                                                                                          | gi 1515543 60.gi 74354 242.gi 7581 2932    | 41,775.90 | 100.00% | 14 | 24 | 76 | 0.65% | 49.60% | GYSFTT 3.25<br>TAER                                 | 1,132.53 |
| ATP | 6018 | Actin, gamma 1                                                                                                          | gi 1515543 60.gi 74354 242.gi 7581 2932    | 41,775.90 | 100.00% | 14 | 24 | 76 | 0.65% | 49.60% | IKIAPPE 3.12<br>RK                                  | 1,164.75 |
| ATP | 6018 | Actin, gamma 1                                                                                                          | gi 1515543 60.gi 74354 242.gi 7581 2932    | 41,775.90 | 100.00% | 14 | 24 | 76 | 0.65% | 49.60% | KDLYAN 5.4<br>TVLSGG<br>TTMYPG<br>IADR              | 2,359.16 |
| ATP | 6018 | Actin, gamma 1                                                                                                          | gi 1515543 60.gi 74354 242.gi 7581 2932    | 41,775.90 | 100.00% | 14 | 24 | 76 | 0.65% | 49.60% | LDLAGR 3.35<br>DLTDYL<br>MK                         | 1,639.84 |
| ATP | 6018 | Actin, gamma 1                                                                                                          | gi 1515543 60.gi 74354 242.gi 7581 2932    | 41,775.90 | 100.00% | 14 | 24 | 76 | 0.65% | 49.60% | QEYDES 2.49<br>GPSIVHR                              | 1,516.70 |
| ATP | 6018 | Actin, gamma 1                                                                                                          | gi 1515543 60.gi 74354 242.gi 7581 2932    | 41,775.90 | 100.00% | 14 | 24 | 76 | 0.65% | 49.60% | QEYDES 2.32<br>GPSIVHR<br>K                         | 1,644.80 |
| ATP | 6018 | Actin, gamma 1                                                                                                          | gi 1515543 60.gi 74354 242.gi 7581 2932    | 41,775.90 | 100.00% | 14 | 24 | 76 | 0.65% | 49.60% | SYELPD 3.84<br>QVITIG<br>NER                        | 1,790.89 |

|     |      |                                                                                                                                                                                                       |                                                                                   |           |         |    |    |    |       |        |                                                |      |          |
|-----|------|-------------------------------------------------------------------------------------------------------------------------------------------------------------------------------------------------------|-----------------------------------------------------------------------------------|-----------|---------|----|----|----|-------|--------|------------------------------------------------|------|----------|
| ATP | 6018 | Actin,<br>gamma 1                                                                                                                                                                                     | gi 1515543<br>60,gi 74354<br>242,gi 7581<br>2932                                  | 41,775.90 | 100.00% | 14 | 24 | 76 | 0.65% | 49.60% | TTGIVM<br>DSGDGV<br>THTVPIY<br>EGYALP<br>HAILR | 6.77 | 3,199.61 |
| ATP | 6018 | Actin,<br>gamma 1                                                                                                                                                                                     | gi 1515543<br>60,gi 74354<br>242,gi 7581<br>2932                                  | 41,775.90 | 100.00% | 14 | 24 | 76 | 0.65% | 49.60% | VAPEEH<br>PVLLTE<br>APLNPK                     | 4.61 | 1,954.06 |
| ATP | 6018 | RecName<br>:<br>Full=40S<br>ribosomal<br>protein<br>S2                                                                                                                                                | gi 1089358<br>89,gi 22935<br>79,gi 74267<br>604,gi 7581<br>2930                   | 31,218.00 | 99.80%  | 2  | 3  | 3  | 0.03% | 8.53%  | SLEEIYL<br>FSLPIK                              | 2.87 | 1,551.87 |
| ATP | 6018 | RecName<br>:<br>Full=40S<br>ribosomal<br>protein<br>S2                                                                                                                                                | gi 1089358<br>89,gi 22935<br>79,gi 74267<br>604,gi 7581<br>2930                   | 31,218.00 | 99.80%  | 2  | 3  | 3  | 0.03% | 8.53%  | SPYQEFT<br>DHLVK                               | 3.43 | 1,463.72 |
| ATP | 6018 | RecName<br>:<br>Full=Pept<br>idyl-<br>tRNA<br>hydrolase<br>2,<br>mitochon<br>drial;<br>Short=PT<br>H 2;<br>AltName:<br>Full=Bcl-<br>2<br>inhibitor<br>of<br>transcript<br>ion;<br>Flags:<br>Precursor | gi 1098928<br>83,gi 11629<br>2141,gi 606<br>50282,gi 73<br>587109,gi 7<br>7735985 | 19,272.70 | 99.80%  | 2  | 2  | 2  | 0.02% | 16.20% | APDEET<br>LVLLT<br>HAK                         | 3.61 | 1,665.87 |
| ATP | 6018 | RecName<br>:<br>Full=Pept<br>idyl-<br>tRNA<br>hydrolase<br>2,<br>mitochon<br>drial;<br>Short=PT<br>H 2;<br>AltName:<br>Full=Bcl-<br>2<br>inhibitor<br>of<br>transcript<br>ion;<br>Flags:<br>Precursor | gi 1098928<br>83,gi 11629<br>2141,gi 606<br>50282,gi 73<br>587109,gi 7<br>7735985 | 19,272.70 | 99.80%  | 2  | 2  | 2  | 0.02% | 16.20% | VLGLTV<br>SLIQDAG<br>R                         | 3.31 | 1,441.84 |
| ATP | 6018 | PDIA3<br>protein                                                                                                                                                                                      | gi 1461869<br>33,gi 14823<br>0374                                                 | 56,913.80 | 100.00% | 16 | 16 | 28 | 0.24% | 37.00% | DLFSEA<br>HSEFLK                               | 4.06 | 1,422.69 |

|     |      |                   |                                   |           |         |    |    |    |       |        |                                          |          |
|-----|------|-------------------|-----------------------------------|-----------|---------|----|----|----|-------|--------|------------------------------------------|----------|
| ATP | 6018 | PDIA3<br>protein  | gi 1461869<br>33,gi 14823<br>0374 | 56,913.80 | 100.00% | 16 | 16 | 28 | 0.24% | 37.00% | EATNPP 3.64<br>VIQEEKP<br>K              | 1,579.83 |
| ATP | 6018 | PDIA3<br>protein  | gi 1461869<br>33,gi 14823<br>0374 | 56,913.80 | 100.00% | 16 | 16 | 28 | 0.24% | 37.00% | ELSDFIS 1.79<br>YLK                      | 1,214.63 |
| ATP | 6018 | PDIA3<br>protein  | gi 1461869<br>33,gi 14823<br>0374 | 56,913.80 | 100.00% | 16 | 16 | 28 | 0.24% | 37.00% | ELSDFIS 2.47<br>YLKR                     | 1,370.73 |
| ATP | 6018 | PDIA3<br>protein  | gi 1461869<br>33,gi 14823<br>0374 | 56,913.80 | 100.00% | 16 | 16 | 28 | 0.24% | 37.00% | FLEDYF 3.46<br>DGNLKR                    | 1,516.74 |
| ATP | 6018 | PDIA3<br>protein  | gi 1461869<br>33,gi 14823<br>0374 | 56,913.80 | 100.00% | 16 | 16 | 28 | 0.24% | 37.00% | FVMQEE 2.8<br>FSR                        | 1,188.54 |
| ATP | 6018 | PDIA3<br>protein  | gi 1461869<br>33,gi 14823<br>0374 | 56,913.80 | 100.00% | 16 | 16 | 28 | 0.24% | 37.00% | GFPTIYF 2.99<br>SPANKK                   | 1,469.78 |
| ATP | 6018 | PDIA3<br>protein  | gi 1461869<br>33,gi 14823<br>0374 | 56,913.80 | 100.00% | 16 | 16 | 28 | 0.24% | 37.00% | IFRDGEE 4.5<br>SGAYDG<br>PR              | 1,668.76 |
| ATP | 6018 | PDIA3<br>protein  | gi 1461869<br>33,gi 14823<br>0374 | 56,913.80 | 100.00% | 16 | 16 | 28 | 0.24% | 37.00% | LRKDPNI 3.14<br>VIK                      | 1,266.79 |
| ATP | 6018 | PDIA3<br>protein  | gi 1461869<br>33,gi 14823<br>0374 | 56,913.80 | 100.00% | 16 | 16 | 28 | 0.24% | 37.00% | MDATAN 4.09<br>DVPSPY<br>EVR             | 1,680.75 |
| ATP | 6018 | PDIA3<br>protein  | gi 1461869<br>33,gi 14823<br>0374 | 56,913.80 | 100.00% | 16 | 16 | 28 | 0.24% | 37.00% | QAGPAS 4.05<br>VPLKSEE<br>EFEK           | 1,845.92 |
| ATP | 6018 | PDIA3<br>protein  | gi 1461869<br>33,gi 14823<br>0374 | 56,913.80 | 100.00% | 16 | 16 | 28 | 0.24% | 37.00% | REATNP 4.33<br>PVIQEEK<br>PK             | 1,735.93 |
| ATP | 6018 | PDIA3<br>protein  | gi 1461869<br>33,gi 14823<br>0374 | 56,913.80 | 100.00% | 16 | 16 | 28 | 0.24% | 37.00% | SEPIPES 2.35<br>NDGPVK                   | 1,368.66 |
| ATP | 6018 | PDIA3<br>protein  | gi 1461869<br>33,gi 14823<br>0374 | 56,913.80 | 100.00% | 16 | 16 | 28 | 0.24% | 37.00% | TADGIVS 2.16<br>HLKK                     | 1,168.67 |
| ATP | 6018 | PDIA3<br>protein  | gi 1461869<br>33,gi 14823<br>0374 | 56,913.80 | 100.00% | 16 | 16 | 28 | 0.24% | 37.00% | TFSHEL 3.42<br>DFGLEST<br>TGEIPVV<br>AVR | 2,591.30 |
| ATP | 6018 | PDIA3<br>protein  | gi 1461869<br>33,gi 14823<br>0374 | 56,913.80 | 100.00% | 16 | 16 | 28 | 0.24% | 37.00% | YGVSGY 2.81<br>PTLK                      | 1,084.57 |
| ATP | 6018 | MCAM<br>protein   | gi 1584550<br>45,gi 15851<br>9851 | 48,983.20 | 99.90%  | 2  | 3  | 5  | 0.04% | 4.55%  | EMEEER 4.13<br>TDDNGV<br>LVLDP<br>QK     | 2,304.07 |
| ATP | 6018 | MCAM<br>protein   | gi 1584550<br>45,gi 15851<br>9851 | 48,983.20 | 99.90%  | 2  | 3  | 5  | 0.04% | 4.55%  | TDDNGV 3.2<br>LVLDP<br>QK                | 1,484.76 |
| ATP | 6018 | PECAM1<br>protein | gi 1113085<br>31                  | 82,597.50 | 100.00% | 7  | 10 | 30 | 0.26% | 11.80% | APVHFTI 2.75<br>EK                       | 1,041.57 |
| ATP | 6018 | PECAM1<br>protein | gi 1113085<br>31                  | 82,597.50 | 100.00% | 7  | 10 | 30 | 0.26% | 11.80% | CTVQVT 4.91<br>HQAQSF<br>PEIIIQK         | 2,170.13 |
| ATP | 6018 | PECAM1<br>protein | gi 1113085<br>31                  | 82,597.50 | 100.00% | 7  | 10 | 30 | 0.26% | 11.80% | EKTSQN 3.05<br>QNFVTL<br>EFTVEE<br>QDR   | 2,542.21 |
| ATP | 6018 | PECAM1<br>protein | gi 1113085<br>31                  | 82,597.50 | 100.00% | 7  | 10 | 30 | 0.26% | 11.80% | FHIPEG 2.85<br>K                         | 940.5252 |
| ATP | 6018 | PECAM1<br>protein | gi 1113085<br>31                  | 82,597.50 | 100.00% | 7  | 10 | 30 | 0.26% | 11.80% | GTETVY 2.82<br>SEIR                      | 1,154.57 |
| ATP | 6018 | PECAM1<br>protein | gi 1113085<br>31                  | 82,597.50 | 100.00% | 7  | 10 | 30 | 0.26% | 11.80% | PAVPLL 2.27<br>NSNNEK                    | 1,295.70 |

|     |      |                                                  |                                      |           |         |    |    |     |       |        |                                    |      |          |
|-----|------|--------------------------------------------------|--------------------------------------|-----------|---------|----|----|-----|-------|--------|------------------------------------|------|----------|
| ATP | 6018 | PECAM1 protein                                   | gi 111308531                         | 82,597.50 | 100.00% | 7  | 10 | 30  | 0.26% | 11.80% | QMPVE<br>MSRPAV<br>PLLNSN<br>NEK   | 4.17 | 2,270.13 |
| ATP | 6018 | PREDICTED: DEAD                                  | gi 119912544,gi 74354729             | 69,131.70 | 99.90%  | 2  | 2  | 3   | 0.03% | 3.58%  | APILIAT<br>DVASR                   | 3.24 | 1,226.71 |
|     |      | (Asp-Glu-Ala-Asp) box polypeptide of 5 isoform 1 |                                      |           |         |    |    |     |       |        |                                    |      |          |
| ATP | 6018 | PREDICTED: DEAD                                  | gi 119912544,gi 74354729             | 69,131.70 | 99.90%  | 2  | 2  | 3   | 0.03% | 3.58%  | QVSDLIS<br>VLR                     | 2.32 | 1,129.66 |
|     |      | (Asp-Glu-Ala-Asp) box polypeptide of 5 isoform 1 |                                      |           |         |    |    |     |       |        |                                    |      |          |
| ATP | 6018 | RecName: Full=40S ribosomal protein S16          | gi 108860953,gi 74354274,gi 75812950 | 16,427.90 | 100.00% | 3  | 3  | 3   | 0.03% | 21.90% | EIKDILIQ<br>YDR                    | 2.59 | 1,405.77 |
| ATP | 6018 | RecName: Full=40S ribosomal protein S16          | gi 108860953,gi 74354274,gi 75812950 | 16,427.90 | 100.00% | 3  | 3  | 3   | 0.03% | 21.90% | GPLQSV<br>QVFGR                    | 3.17 | 1,187.65 |
| ATP | 6018 | RecName: Full=40S ribosomal protein S16          | gi 108860953,gi 74354274,gi 75812950 | 16,427.90 | 100.00% | 3  | 3  | 3   | 0.03% | 21.90% | LLEPVLL<br>LGK                     | 2.31 | 1,094.72 |
| ATP | 6018 | PREDICTED: nucleolin isoform 1                   | gi 76682880                          | 77,835.80 | 100.00% | 3  | 4  | 4   | 0.03% | 6.67%  | NDLAVV<br>DVR                      | 2.74 | 1,000.54 |
| ATP | 6018 | PREDICTED: nucleolin isoform 1                   | gi 76682880                          | 77,835.80 | 100.00% | 3  | 4  | 4   | 0.03% | 6.67%  | TLVLSN<br>LSYSATE<br>ETLQEV<br>FEK | 4.41 | 2,501.27 |
| ATP | 6018 | PREDICTED: nucleolin isoform 1                   | gi 76682880                          | 77,835.80 | 100.00% | 3  | 4  | 4   | 0.03% | 6.67%  | VTQDEL<br>KEVFED<br>AVEIR          | 3.41 | 2,020.02 |
| ATP | 6018 | vimentin 70                                      | gi 110347570                         | 53,710.80 | 100.00% | 29 | 43 | 110 | 0.94% | 64.20% | DGQVIN<br>ETSQHH<br>DDLE           | 2.9  | 1,836.80 |
| ATP | 6018 | vimentin 70                                      | gi 110347570                         | 53,710.80 | 100.00% | 29 | 43 | 110 | 0.94% | 64.20% | DNLAEDI<br>MR                      | 2.6  | 1,092.50 |
| ATP | 6018 | vimentin 70                                      | gi 110347570                         | 53,710.80 | 100.00% | 29 | 43 | 110 | 0.94% | 64.20% | EEAESTL<br>QEFR                    | 2.87 | 1,296.61 |
| ATP | 6018 | vimentin 70                                      | gi 110347570                         | 53,710.80 | 100.00% | 29 | 43 | 110 | 0.94% | 64.20% | EEAESTL<br>QSFRQD<br>VDNASL<br>AR  | 4.19 | 2,366.12 |
| ATP | 6018 | vimentin 70                                      | gi 110347570                         | 53,710.80 | 100.00% | 29 | 43 | 110 | 0.94% | 64.20% | EKLQEE<br>MLQREE<br>AESTLQS<br>FR  | 4.41 | 2,597.25 |

|     |      |          |                  |           |         |    |    |     |       |        |                                                      |      |          |
|-----|------|----------|------------------|-----------|---------|----|----|-----|-------|--------|------------------------------------------------------|------|----------|
| ATP | 6018 | vimentin | gi 1103475<br>70 | 53,710.80 | 100.00% | 29 | 43 | 110 | 0.94% | 64.20% | EMEENF<br>SVEAAN<br>YQDTIG<br>R                      | 3.92 | 2,218.96 |
| ATP | 6018 | vimentin | gi 1103475<br>70 | 53,710.80 | 100.00% | 29 | 43 | 110 | 0.94% | 64.20% | ETNLDS<br>LPLVDT<br>HSK                              | 3.83 | 1,668.84 |
| ATP | 6018 | vimentin | gi 1103475<br>70 | 53,710.80 | 100.00% | 29 | 43 | 110 | 0.94% | 64.20% | ETNLDS<br>LPLVDT<br>HSKR                             | 3.69 | 1,824.95 |
| ATP | 6018 | vimentin | gi 1103475<br>70 | 53,710.80 | 100.00% | 29 | 43 | 110 | 0.94% | 64.20% | EYQDLL<br>NVK                                        | 2.18 | 1,121.58 |
| ATP | 6018 | vimentin | gi 1103475<br>70 | 53,710.80 | 100.00% | 29 | 43 | 110 | 0.94% | 64.20% | FADLSE<br>AANR                                       | 4.37 | 1,093.53 |
| ATP | 6018 | vimentin | gi 1103475<br>70 | 53,710.80 | 100.00% | 29 | 43 | 110 | 0.94% | 64.20% | FANYID<br>KVR                                        | 2.54 | 1,125.61 |
| ATP | 6018 | vimentin | gi 1103475<br>70 | 53,710.80 | 100.00% | 29 | 43 | 110 | 0.94% | 64.20% | ILLAELE<br>QLK                                       | 4.39 | 1,169.71 |
| ATP | 6018 | vimentin | gi 1103475<br>70 | 53,710.80 | 100.00% | 29 | 43 | 110 | 0.94% | 64.20% | ILLAELE<br>QLKGQG<br>K                               | 1.85 | 1,539.91 |
| ATP | 6018 | vimentin | gi 1103475<br>70 | 53,710.80 | 100.00% | 29 | 43 | 110 | 0.94% | 64.20% | ISLPLPN<br>FSSLNLR                                   | 4.53 | 1,570.90 |
| ATP | 6018 | vimentin | gi 1103475<br>70 | 53,710.80 | 100.00% | 29 | 43 | 110 | 0.94% | 64.20% | KLHDEEI<br>QELQAI<br>QEHVQ<br>IDMDVS<br>KPDLT<br>ALR | 4.18 | 4,085.06 |
| ATP | 6018 | vimentin | gi 1103475<br>70 | 53,710.80 | 100.00% | 29 | 43 | 110 | 0.94% | 64.20% | KVESLQ<br>EEIAFLK                                    | 5.31 | 1,533.85 |
| ATP | 6018 | vimentin | gi 1103475<br>70 | 53,710.80 | 100.00% | 29 | 43 | 110 | 0.94% | 64.20% | KVESLQ<br>EEIAFLK<br>K                               | 4.34 | 1,661.95 |
| ATP | 6018 | vimentin | gi 1103475<br>70 | 53,710.80 | 100.00% | 29 | 43 | 110 | 0.94% | 64.20% | LHDEEI<br>ELQAIQ<br>EQHVQI<br>DMDVSK<br>PDLTAA<br>LR | 5.81 | 3,956.97 |
| ATP | 6018 | vimentin | gi 1103475<br>70 | 53,710.80 | 100.00% | 29 | 43 | 110 | 0.94% | 64.20% | LLQDSV<br>DFSLAD<br>AINTEFK                          | 4.63 | 2,126.07 |
| ATP | 6018 | vimentin | gi 1103475<br>70 | 53,710.80 | 100.00% | 29 | 43 | 110 | 0.94% | 64.20% | LQDEIQ<br>NMKEE<br>MAR                               | 2.04 | 1,750.81 |
| ATP | 6018 | vimentin | gi 1103475<br>70 | 53,710.80 | 100.00% | 29 | 43 | 110 | 0.94% | 64.20% | LQEEML<br>QREEAE<br>STLQSFR                          | 4.57 | 2,340.11 |
| ATP | 6018 | vimentin | gi 1103475<br>70 | 53,710.80 | 100.00% | 29 | 43 | 110 | 0.94% | 64.20% | LQEEML<br>QREEAE<br>STLQSFR<br>QDVDNA<br>SLAR        | 3.25 | 3,409.63 |
| ATP | 6018 | vimentin | gi 1103475<br>70 | 53,710.80 | 100.00% | 29 | 43 | 110 | 0.94% | 64.20% | MALDIEI<br>ATYR                                      | 3.73 | 1,311.66 |
| ATP | 6018 | vimentin | gi 1103475<br>70 | 53,710.80 | 100.00% | 29 | 43 | 110 | 0.94% | 64.20% | RMFGGP<br>GTASRP<br>SSTR                             | 1.68 | 1,680.82 |
| ATP | 6018 | vimentin | gi 1103475<br>70 | 53,710.80 | 100.00% | 29 | 43 | 110 | 0.94% | 64.20% | SRLGDL<br>YEEEMR                                     | 2.74 | 1,513.70 |
| ATP | 6018 | vimentin | gi 1103475<br>70 | 53,710.80 | 100.00% | 29 | 43 | 110 | 0.94% | 64.20% | TLYTSSP<br>GGVYAT<br>R                               | 4.2  | 1,472.74 |

|     |      |                                                                                                                                                 |                                                                                    |           |         |    |    |     |       |        |                           |      |          |
|-----|------|-------------------------------------------------------------------------------------------------------------------------------------------------|------------------------------------------------------------------------------------|-----------|---------|----|----|-----|-------|--------|---------------------------|------|----------|
| ATP | 6018 | vimentin                                                                                                                                        | gi 1103475<br>70                                                                   | 53,710.80 | 100.00% | 29 | 43 | 110 | 0.94% | 64.20% | TNEKVE<br>LQELND<br>R     | 4.88 | 1,587.80 |
| ATP | 6018 | vimentin                                                                                                                                        | gi 1103475<br>70                                                                   | 53,710.80 | 100.00% | 29 | 43 | 110 | 0.94% | 64.20% | VELQEL<br>NDR             | 3.31 | 1,115.57 |
| ATP | 6018 | vimentin                                                                                                                                        | gi 1103475<br>70                                                                   | 53,710.80 | 100.00% | 29 | 43 | 110 | 0.94% | 64.20% | VEVERD<br>NLAEDI<br>MR    | 4.29 | 1,704.82 |
| ATP | 6018 | PREDIC<br>TED:<br>similar to<br>Rho GDP-<br>dissociati<br>on<br>inhibitor<br>1 (Rho<br>GDI 1)<br>(Rho-<br>GDI<br>alpha)<br>(GDI-1)<br>isoform 1 | gi 1199383<br>19,gi 12110<br>7,gi 286037<br>74,gi 714,gi<br>7245833,gi<br>73587159 | 23,403.80 | 100.00% | 4  | 4  | 4   | 0.03% | 30.40% | AEEYEF<br>LTPMEE<br>APK   | 3.14 | 1,799.80 |
| ATP | 6018 | PREDIC<br>TED:<br>similar to<br>Rho GDP-<br>dissociati<br>on<br>inhibitor<br>1 (Rho<br>GDI 1)<br>(Rho-<br>GDI<br>alpha)<br>(GDI-1)<br>isoform 1 | gi 1199383<br>19,gi 12110<br>7,gi 286037<br>74,gi 714,gi<br>7245833,gi<br>73587159 | 23,403.80 | 100.00% | 4  | 4  | 4   | 0.03% | 30.40% | IDKTDY<br>MVGSYG<br>PR    | 2.77 | 1,617.76 |
| ATP | 6018 | PREDIC<br>TED:<br>similar to<br>Rho GDP-<br>dissociati<br>on<br>inhibitor<br>1 (Rho<br>GDI 1)<br>(Rho-<br>GDI<br>alpha)<br>(GDI-1)<br>isoform 1 | gi 1199383<br>19,gi 12110<br>7,gi 286037<br>74,gi 714,gi<br>7245833,gi<br>73587159 | 23,403.80 | 100.00% | 4  | 4  | 4   | 0.03% | 30.40% | SIQEIQE<br>LDKDDE<br>SLRK | 3.64 | 2,046.04 |
| ATP | 6018 | PREDIC<br>TED:<br>similar to<br>Rho GDP-<br>dissociati<br>on<br>inhibitor<br>1 (Rho<br>GDI 1)<br>(Rho-<br>GDI<br>alpha)<br>(GDI-1)<br>isoform 1 | gi 1199383<br>19,gi 12110<br>7,gi 286037<br>74,gi 714,gi<br>7245833,gi<br>73587159 | 23,403.80 | 100.00% | 4  | 4  | 4   | 0.03% | 30.40% | VAVSAD<br>PNVNV<br>VVTR   | 4.18 | 1,636.90 |

|     |      |                                                                                          |                                                      |           |         |   |   |    |       |        |                                                   |          |
|-----|------|------------------------------------------------------------------------------------------|------------------------------------------------------|-----------|---------|---|---|----|-------|--------|---------------------------------------------------|----------|
| ATP | 6018 | Leucine rich repeat containin g 59                                                       | gi 1096593 25,gi 59857 957,gi 7507 0060,gi 777 36103 | 34,862.40 | 100.00% | 6 | 9 | 17 | 0.15% | 17.30% | DKLDGN 6.66<br>ELDLSLS<br>DLNEVP<br>VK            | 2,313.18 |
| ATP | 6018 | Leucine rich repeat containin g 59                                                       | gi 1096593 25,gi 59857 957,gi 7507 0060,gi 777 36103 | 34,862.40 | 100.00% | 6 | 9 | 17 | 0.15% | 17.30% | DKLDGN 5.62<br>ELDLSLS<br>DLNEVP<br>VKELAA<br>LPK | 3,035.62 |
| ATP | 6018 | Leucine rich repeat containin g 59                                                       | gi 1096593 25,gi 59857 957,gi 7507 0060,gi 777 36103 | 34,862.40 | 100.00% | 6 | 9 | 17 | 0.15% | 17.30% | LDGNEL 4.41<br>DLSLSDL<br>NEVPVK                  | 2,070.06 |
| ATP | 6018 | Leucine rich repeat containin g 59                                                       | gi 1096593 25,gi 59857 957,gi 7507 0060,gi 777 36103 | 34,862.40 | 100.00% | 6 | 9 | 17 | 0.15% | 17.30% | LDGNEL 3.91<br>DLSLSDL<br>NEVPVK<br>ELAALP<br>K   | 2,792.49 |
| ATP | 6018 | Leucine rich repeat containin g 59                                                       | gi 1096593 25,gi 59857 957,gi 7507 0060,gi 777 36103 | 34,862.40 | 100.00% | 6 | 9 | 17 | 0.15% | 17.30% | LVNLQH 2.73<br>LDLLNN<br>R                        | 1,561.88 |
| ATP | 6018 | Leucine rich repeat containin g 59                                                       | gi 1096593 25,gi 59857 957,gi 7507 0060,gi 777 36103 | 34,862.40 | 100.00% | 6 | 9 | 17 | 0.15% | 17.30% | LVTLPVS 3.67<br>FAQLK                             | 1,315.80 |
| ATP | 6018 | RecName : Full=CD GSH iron sulfur domain- containin g protein 1; AltName: Full=Mit oNEET | gi 1108257 57,gi 73587 067,gi 7740 4223              | 11,964.80 | 99.80%  | 2 | 2 | 3  | 0.03% | 26.40% | HNEETG 5.04<br>DNVGPLI<br>IK                      | 1,635.83 |
| ATP | 6018 | RecName : Full=CD GSH iron sulfur domain- containin g protein 1; AltName: Full=Mit oNEET | gi 1108257 57,gi 73587 067,gi 7740 4223              | 11,964.80 | 99.80%  | 2 | 2 | 3  | 0.03% | 26.40% | VVHAFD 3.5<br>MEDLGD<br>K                         | 1,491.68 |
| ATP | 6018 | 17,000 dalton myosin light chain                                                         | gi 578,gi 74 268209                                  | 16,942.80 | 100.00% | 5 | 5 | 5  | 0.04% | 45.00% | ALGQNP 2.83<br>TNAEVL<br>K                        | 1,354.73 |
| ATP | 6018 | 17,000 dalton myosin light chain                                                         | gi 578,gi 74 268209                                  | 16,942.80 | 100.00% | 5 | 5 | 5  | 0.04% | 45.00% | EAFQLF 2.17<br>DR                                 | 1,025.51 |



|     |      |                                                                                                                                                                                                                                                        |                                                       |           |         |   |   |    |       |        |                                    |      |          |
|-----|------|--------------------------------------------------------------------------------------------------------------------------------------------------------------------------------------------------------------------------------------------------------|-------------------------------------------------------|-----------|---------|---|---|----|-------|--------|------------------------------------|------|----------|
| ATP | 6018 | 17,000 dalton                                                                                                                                                                                                                                          | gi 578,gi 74 268209                                   | 16,942.80 | 100.00% | 5 | 5 | 5  | 0.04% | 45.00% | NKDQGT<br>YEDYVE<br>GLR            | 3.31 | 1,786.82 |
| ATP | 6018 | 17,000 dalton                                                                                                                                                                                                                                          | gi 578,gi 74 268209                                   | 16,942.80 | 100.00% | 5 | 5 | 5  | 0.04% | 45.00% | VFDKEG<br>NGTVM<br>GAEIR           | 3.02 | 1,738.84 |
| ATP | 6018 | 17,000 dalton                                                                                                                                                                                                                                          | gi 578,gi 74 268209                                   | 16,942.80 | 100.00% | 5 | 5 | 5  | 0.04% | 45.00% | VLDFEH<br>FLPMLQ<br>TVAK           | 2.48 | 1,904.00 |
| ATP | 6018 | RecName :<br>Full=Stre<br>ss-70<br>protein,<br>mitochon<br>drial;<br>AltName:<br>Full=75<br>kDa<br>glucose-<br>regulated<br>protein;<br>AltName:<br>Full=GR<br>P 75;<br>AltName:<br>Full=Hea<br>t shock<br>70 kDa<br>protein 9;<br>Flags:<br>Precursor | gi 1221440 79,gi 14623 1780,gi 735 86960,gi 77 735995 | 73,724.40 | 100.00% | 9 | 9 | 11 | 0.09% | 20.80% | DAGQIS<br>GLNVLR                   | 3.07 | 1,242.68 |
| ATP | 6018 | RecName :<br>Full=Stre<br>ss-70<br>protein,<br>mitochon<br>drial;<br>AltName:<br>Full=75<br>kDa<br>glucose-<br>regulated<br>protein;<br>AltName:<br>Full=GR<br>P 75;<br>AltName:<br>Full=Hea<br>t shock<br>70 kDa<br>protein 9;<br>Flags:<br>Precursor | gi 1221440 79,gi 14623 1780,gi 735 86960,gi 77 735995 | 73,724.40 | 100.00% | 9 | 9 | 11 | 0.09% | 20.80% | EQQIVIQ<br>SSGGLS<br>KDDIEN<br>MVK | 2.25 | 2,434.21 |

|     |      |                                                                                                                                                                                                                                                                                                                 |           |         |   |   |    |       |        |                              |          |
|-----|------|-----------------------------------------------------------------------------------------------------------------------------------------------------------------------------------------------------------------------------------------------------------------------------------------------------------------|-----------|---------|---|---|----|-------|--------|------------------------------|----------|
| ATP | 6018 | RecName gi 1221440<br>: 79,gi 14623<br>Full=Stre 1780,gi 735<br>ss-70 86960,gi 77<br>protein, 735995<br>mitochon<br>drial;<br>AltName:<br>Full=75<br>kDa<br>glucose-<br>regulated<br>protein;<br>AltName:<br>Full=GR<br>P 75;<br>AltName:<br>Full=Hea<br>t shock<br>70 kDa<br>protein 9;<br>Flags:<br>Precursor | 73,724.40 | 100.00% | 9 | 9 | 11 | 0.09% | 20.80% | ETGVDL 2.44<br>TKDNMA<br>LQR | 1,706.84 |
| ATP | 6018 | RecName gi 1221440<br>: 79,gi 14623<br>Full=Stre 1780,gi 735<br>ss-70 86960,gi 77<br>protein, 735995<br>mitochon<br>drial;<br>AltName:<br>Full=75<br>kDa<br>glucose-<br>regulated<br>protein;<br>AltName:<br>Full=GR<br>P 75;<br>AltName:<br>Full=Hea<br>t shock<br>70 kDa<br>protein 9;<br>Flags:<br>Precursor | 73,724.40 | 100.00% | 9 | 9 | 11 | 0.09% | 20.80% | MKETAE 3.78<br>NYLGHT<br>AK  | 1,608.77 |

|     |      |                                                                                                                                                                                                                                                                                                                 |           |         |   |   |    |       |        |                              |          |
|-----|------|-----------------------------------------------------------------------------------------------------------------------------------------------------------------------------------------------------------------------------------------------------------------------------------------------------------------|-----------|---------|---|---|----|-------|--------|------------------------------|----------|
| ATP | 6018 | RecName gi 1221440 :<br>79,gi 14623<br>Full=Stre 1780,gi 735<br>ss-70 86960,gi 77<br>protein, 735995<br>mitochon<br>drial;<br>AltName:<br>Full=75<br>kDa<br>glucose-<br>regulated<br>protein;<br>AltName:<br>Full=GR<br>P 75;<br>AltName:<br>Full=Hea<br>t shock<br>70 kDa<br>protein 9;<br>Flags:<br>Precursor | 73,724.40 | 100.00% | 9 | 9 | 11 | 0.09% | 20.80% | NAVITVP 2.69<br>AYFNDS<br>QR | 1,694.85 |
| ATP | 6018 | RecName gi 1221440 :<br>79,gi 14623<br>Full=Stre 1780,gi 735<br>ss-70 86960,gi 77<br>protein, 735995<br>mitochon<br>drial;<br>AltName:<br>Full=75<br>kDa<br>glucose-<br>regulated<br>protein;<br>AltName:<br>Full=GR<br>P 75;<br>AltName:<br>Full=Hea<br>t shock<br>70 kDa<br>protein 9;<br>Flags:<br>Precursor | 73,724.40 | 100.00% | 9 | 9 | 11 | 0.09% | 20.80% | QAVTNP 3.17<br>NNTFYA<br>TK  | 1,568.77 |

|     |      |                                                                                                                                                                                                                                                                                                                 |           |         |   |   |    |       |        |                                      |          |
|-----|------|-----------------------------------------------------------------------------------------------------------------------------------------------------------------------------------------------------------------------------------------------------------------------------------------------------------------|-----------|---------|---|---|----|-------|--------|--------------------------------------|----------|
| ATP | 6018 | RecName gi 1221440<br>: 79,gi 14623<br>Full=Stre 1780,gi 735<br>ss-70 86960,gi 77<br>protein, 735995<br>mitochon<br>drial;<br>AltName:<br>Full=75<br>kDa<br>glucose-<br>regulated<br>protein;<br>AltName:<br>Full=GR<br>P 75;<br>AltName:<br>Full=Hea<br>t shock<br>70 kDa<br>protein 9;<br>Flags:<br>Precursor | 73,724.40 | 100.00% | 9 | 9 | 11 | 0.09% | 20.80% | STNGDT 4.12<br>FLGGED<br>FDQALL<br>R | 2,055.96 |
| ATP | 6018 | RecName gi 1221440<br>: 79,gi 14623<br>Full=Stre 1780,gi 735<br>ss-70 86960,gi 77<br>protein, 735995<br>mitochon<br>drial;<br>AltName:<br>Full=75<br>kDa<br>glucose-<br>regulated<br>protein;<br>AltName:<br>Full=GR<br>P 75;<br>AltName:<br>Full=Hea<br>t shock<br>70 kDa<br>protein 9;<br>Flags:<br>Precursor | 73,724.40 | 100.00% | 9 | 9 | 11 | 0.09% | 20.80% | TTPSVV 3.69<br>AFTADG<br>ER          | 1,450.72 |

|     |      |                                                                                                                                                                                                                                                        |                                                                   |           |         |   |   |    |       |        |                                         |          |
|-----|------|--------------------------------------------------------------------------------------------------------------------------------------------------------------------------------------------------------------------------------------------------------|-------------------------------------------------------------------|-----------|---------|---|---|----|-------|--------|-----------------------------------------|----------|
| ATP | 6018 | RecName :<br>Full=Stre<br>ss-70<br>protein,<br>mitochon<br>drial;<br>AltName:<br>Full=75<br>kDa<br>glucose-<br>regulated<br>protein;<br>AltName:<br>Full=GR<br>P 75;<br>AltName:<br>Full=Hea<br>t shock<br>70 kDa<br>protein 9;<br>Flags:<br>Precursor | gi 1221440<br>79,gi 14623<br>1780,gi 735<br>86960,gi 77<br>735995 | 73,724.40 | 100.00% | 9 | 9 | 11 | 0.09% | 20.80% | VINEPTA 3.94<br>AALAYG<br>LDK           | 1,645.88 |
| ATP | 6018 | Actin,<br>alpha,<br>cardiac<br>muscle 1                                                                                                                                                                                                                | gi 7358703<br>9,gi 777361<br>17                                   | 42,002.10 | 100.00% | 7 | 9 | 13 | 0.11% | 45.40% | AVFPSIV 2.88<br>GRPR                    | 1,198.71 |
| ATP | 6018 | Actin,<br>alpha,<br>cardiac<br>muscle 1                                                                                                                                                                                                                | gi 7358703<br>9,gi 777361<br>17                                   | 42,002.10 | 100.00% | 7 | 9 | 13 | 0.11% | 45.40% | DLTDYL 2.57<br>MK                       | 1,014.48 |
| ATP | 6018 | Actin,<br>alpha,<br>cardiac<br>muscle 1                                                                                                                                                                                                                | gi 7358703<br>9,gi 777361<br>17                                   | 42,002.10 | 100.00% | 7 | 9 | 13 | 0.11% | 45.40% | DLYANN 4.13<br>VLSGGT<br>TMYPGI<br>ADR  | 2,244.06 |
| ATP | 6018 | Actin,<br>alpha,<br>cardiac<br>muscle 1                                                                                                                                                                                                                | gi 7358703<br>9,gi 777361<br>17                                   | 42,002.10 | 100.00% | 7 | 9 | 13 | 0.11% | 45.40% | EITALAP 2.84<br>STMK                    | 1,161.62 |
| ATP | 6018 | Actin,<br>alpha,<br>cardiac<br>muscle 1                                                                                                                                                                                                                | gi 7358703<br>9,gi 777361<br>17                                   | 42,002.10 | 100.00% | 7 | 9 | 13 | 0.11% | 45.40% | GYSFVT 3.62<br>TAER                     | 1,130.55 |
| ATP | 6018 | Actin,<br>alpha,<br>cardiac<br>muscle 1                                                                                                                                                                                                                | gi 7358703<br>9,gi 777361<br>17                                   | 42,002.10 | 100.00% | 7 | 9 | 13 | 0.11% | 45.40% | IKIAPPE 3.12<br>RK                      | 1,164.75 |
| ATP | 6018 | Actin,<br>alpha,<br>cardiac<br>muscle 1                                                                                                                                                                                                                | gi 7358703<br>9,gi 777361<br>17                                   | 42,002.10 | 100.00% | 7 | 9 | 13 | 0.11% | 45.40% | KDLYAN 5.25<br>NVLSGG<br>TTMYPG<br>IADR | 2,372.16 |
| ATP | 6018 | Actin,<br>alpha,<br>cardiac<br>muscle 1                                                                                                                                                                                                                | gi 7358703<br>9,gi 777361<br>17                                   | 42,002.10 | 100.00% | 7 | 9 | 13 | 0.11% | 45.40% | LDLAGR 3.35<br>DLTDYL<br>MK             | 1,639.84 |
| ATP | 6018 | Actin,<br>alpha,<br>cardiac<br>muscle 1                                                                                                                                                                                                                | gi 7358703<br>9,gi 777361<br>17                                   | 42,002.10 | 100.00% | 7 | 9 | 13 | 0.11% | 45.40% | QEYDEA 3.4<br>GPSIVHR                   | 1,500.71 |
| ATP | 6018 | Actin,<br>alpha,<br>cardiac<br>muscle 1                                                                                                                                                                                                                | gi 7358703<br>9,gi 777361<br>17                                   | 42,002.10 | 100.00% | 7 | 9 | 13 | 0.11% | 45.40% | SYELPD 3.84<br>GQVITIG<br>NER           | 1,790.89 |

|     |      |                                          |                                                  |           |         |   |   |    |       |        |                                                      |          |
|-----|------|------------------------------------------|--------------------------------------------------|-----------|---------|---|---|----|-------|--------|------------------------------------------------------|----------|
| ATP | 6018 | Actin, alpha, cardiac muscle 1           | gi 7358703<br>9,gi 777361<br>17                  | 42,002.10 | 100.00% | 7 | 9 | 13 | 0.11% | 45.40% | TTGIVLD 5.69<br>SGDGVT<br>HNVPIYE<br>GYALPH<br>AIMR  | 3,212.60 |
| ATP | 6018 | Actin, alpha, cardiac muscle 1           | gi 7358703<br>9,gi 777361<br>17                  | 42,002.10 | 100.00% | 7 | 9 | 13 | 0.11% | 45.40% | VAPEEH 4.11<br>PTLLTEA<br>PLNPK                      | 1,956.04 |
| ATP | 6018 | Actin, alpha, cardiac muscle 1           | gi 7358703<br>9,gi 777361<br>17                  | 42,002.10 | 100.00% | 7 | 9 | 13 | 0.11% | 45.40% | YPIEHGII 4.08<br>TNWDD<br>MEK                        | 1,976.91 |
| ATP | 6018 | RAB14 protein                            | gi 1584550<br>25,gi 19553<br>9521                | 23,879.60 | 100.00% | 6 | 8 | 11 | 0.09% | 34.00% | GAAGAL 4.66<br>MVYDIT<br>R                           | 1,353.68 |
| ATP | 6018 | RAB14 protein                            | gi 1584550<br>25,gi 19553<br>9521                | 23,879.60 | 100.00% | 6 | 8 | 11 | 0.09% | 34.00% | IYQNIQD 5.06<br>GSLDLN<br>AAESGV<br>QHKPSA<br>PQGGR  | 3,150.56 |
| ATP | 6018 | RAB14 protein                            | gi 1584550<br>25,gi 19553<br>9521                | 23,879.60 | 100.00% | 6 | 8 | 11 | 0.09% | 34.00% | KIYQNIQ 5.65<br>DGSLDL<br>NAAESG<br>VQHKPS<br>APQGGR | 3,278.65 |
| ATP | 6018 | RAB14 protein                            | gi 1584550<br>25,gi 19553<br>9521                | 23,879.60 | 100.00% | 6 | 8 | 11 | 0.09% | 34.00% | NLTNPN 4.55<br>TVIILIGN<br>K                         | 1,623.94 |
| ATP | 6018 | RAB14 protein                            | gi 1584550<br>25,gi 19553<br>9521                | 23,879.60 | 100.00% | 6 | 8 | 11 | 0.09% | 34.00% | TGENVE 3.38<br>DAFLEA<br>AK                          | 1,493.71 |
| ATP | 6018 | RAB14 protein                            | gi 1584550<br>25,gi 19553<br>9521                | 23,879.60 | 100.00% | 6 | 8 | 11 | 0.09% | 34.00% | TGENVE 2.83<br>DAFLEA<br>AKK                         | 1,621.81 |
| ATP | 6018 | RAB2A, member RAS oncogene family        | gi 1099399<br>03,gi 11673<br>4835                | 20,833.10 | 100.00% | 3 | 4 | 7  | 0.06% | 19.00% | EHGLIF 2.73<br>METSAC                                | 1,378.67 |
| ATP | 6018 | RAB2A, member RAS oncogene family        | gi 1099399<br>03,gi 11673<br>4835                | 20,833.10 | 100.00% | 3 | 4 | 7  | 0.06% | 19.00% | GAAGAL 3.05<br>LVYDITR                               | 1,319.73 |
| ATP | 6018 | RAB2A, member RAS oncogene family        | gi 1099399<br>03,gi 11673<br>4835                | 20,833.10 | 100.00% | 3 | 4 | 7  | 0.06% | 19.00% | YIIIGDT 2.6<br>GVGK                                  | 1,135.64 |
| ATP | 6018 | RecName : Full=Phosphoglycerate kinase 1 | gi 1088608<br>85,gi 74353<br>972,gi 7773<br>5551 | 44,520.20 | 100.00% | 4 | 6 | 6  | 0.05% | 15.30% | AHSSMV 3.14<br>GVNLPK                                | 1,255.65 |
| ATP | 6018 | RecName : Full=Phosphoglycerate kinase 1 | gi 1088608<br>85,gi 74353<br>972,gi 7773<br>5551 | 44,520.20 | 100.00% | 4 | 6 | 6  | 0.05% | 15.30% | ALESPER 4.21<br>PFLAILG<br>GAK                       | 1,769.00 |

|     |      |                                                                                                                                                   |                                                                                                                                                                                            |           |         |   |   |    |       |        |                                                     |          |
|-----|------|---------------------------------------------------------------------------------------------------------------------------------------------------|--------------------------------------------------------------------------------------------------------------------------------------------------------------------------------------------|-----------|---------|---|---|----|-------|--------|-----------------------------------------------------|----------|
| ATP | 6018 | RecName<br>:<br>Full=Pho<br>sphoglyc<br>erate<br>kinase 1                                                                                         | gi 1088608<br>85,gi 74353<br>972,gi 7773<br>5551                                                                                                                                           | 44,520.20 | 100.00% | 4 | 6 | 6  | 0.05% | 15.30% | VDFNVP 3.63<br>MKNNQI<br>TNNQR                      | 2,048.00 |
| ATP | 6018 | RecName<br>:<br>Full=Pho<br>sphoglyc<br>erate<br>kinase 1                                                                                         | gi 1088608<br>85,gi 74353<br>972,gi 7773<br>5551                                                                                                                                           | 44,520.20 | 100.00% | 4 | 6 | 6  | 0.05% | 15.30% | VLNNME 3.61<br>IGTSLFD<br>EEGSK                     | 1,998.93 |
| ATP | 6018 | RAB5A,<br>member<br>RAS<br>oncogene<br>family                                                                                                     | gi 1139118<br>76,gi 11549<br>5947,gi 122<br>144200                                                                                                                                         | 23,670.90 | 99.80%  | 2 | 2 | 4  | 0.03% | 21.90% | GVDLTE 2.7<br>PTQPTR                                | 1,313.67 |
| ATP | 6018 | RAB5A,<br>member<br>RAS<br>oncogene<br>family                                                                                                     | gi 1139118<br>76,gi 11549<br>5947,gi 122<br>144200                                                                                                                                         | 23,670.90 | 99.80%  | 2 | 2 | 4  | 0.03% | 21.90% | LVLLGE 3.81<br>SAVGK                                | 1,085.66 |
| ATP | 6018 | RAB5A,<br>member<br>RAS<br>oncogene<br>family                                                                                                     | gi 1139118<br>76,gi 11549<br>5947,gi 122<br>144200                                                                                                                                         | 23,670.90 | 99.80%  | 2 | 2 | 4  | 0.03% | 21.90% | TSMNVN 3.9<br>EIFMAIA<br>K                          | 1,584.78 |
| ATP | 6018 | RAB5A,<br>member<br>RAS<br>oncogene<br>family                                                                                                     | gi 1139118<br>76,gi 11549<br>5947,gi 122<br>144200                                                                                                                                         | 23,670.90 | 99.80%  | 2 | 2 | 4  | 0.03% | 21.90% | YHSLAP 2.6<br>MYR                                   | 1,316.61 |
| ATP | 6018 | FAP<br>protein                                                                                                                                    | gi 1461864<br>88,gi 14823<br>3352                                                                                                                                                          | 87,719.00 | 99.80%  | 2 | 2 | 2  | 0.02% | 3.55%  | FMGLPT 2.7<br>KDDNLK                                | 1,394.70 |
| ATP | 6018 | FAP<br>protein                                                                                                                                    | gi 1461864<br>88,gi 14823<br>3352                                                                                                                                                          | 87,719.00 | 99.80%  | 2 | 2 | 2  | 0.02% | 3.55%  | IFIIDATY 3.4<br>PEHIGPR                             | 1,741.93 |
| ATP | 6018 | Chain R,<br>Cadmium<br>Ion<br>Binding<br>Structure<br>Of<br>Bovine<br>Heart<br>Cytochro<br>me C<br>Oxidase<br>In The<br>Fully<br>Reduced<br>State | gi 1492415<br>23,gi 14924<br>1540,gi 149<br>241553,gi 1<br>49241570,g<br>i 14924158<br>3,gi 149241<br>600,gi 1492<br>41613,gi 42<br>564216,gi 5<br>0872151,gi <br>60391934,g<br>i 81674705 | 16,717.40 | 100.00% | 3 | 4 | 10 | 0.09% | 35.50% | EIYPYVI 6.92<br>QELRPTL<br>NELGIST<br>PEELGL<br>DKV | 3,428.82 |
| ATP | 6018 | Chain R,<br>Cadmium<br>Ion<br>Binding<br>Structure<br>Of<br>Bovine<br>Heart<br>Cytochro<br>me C<br>Oxidase<br>In The<br>Fully<br>Reduced<br>State | gi 1492415<br>23,gi 14924<br>1540,gi 149<br>241553,gi 1<br>49241570,g<br>i 14924158<br>3,gi 149241<br>600,gi 1492<br>41613,gi 42<br>564216,gi 5<br>0872151,gi <br>60391934,g<br>i 81674705 | 16,717.40 | 100.00% | 3 | 4 | 10 | 0.09% | 35.50% | GMNTLV 4.47<br>GYDLVP<br>EPK                        | 1,648.83 |

|     |      |                                                                                                        |                                                                                                                                                                                       |           |         |   |   |    |       |        |                       |      |          |
|-----|------|--------------------------------------------------------------------------------------------------------|---------------------------------------------------------------------------------------------------------------------------------------------------------------------------------------|-----------|---------|---|---|----|-------|--------|-----------------------|------|----------|
| ATP | 6018 | Chain R, Cadmium Ion Binding Structure Of Bovine Heart Cytochrome C Oxidase In The Fully Reduced State | gi 149241523,gi 149241540,gi 149241553,gi 149241570,gi 149241583,gi 149241600,gi 149241613,gi 149241621,gi 149241635,gi 149241642,gi 149241655,gi 149241682,gi 149241694,gi 149241705 | 16,717.40 | 100.00% | 3 | 4 | 10 | 0.09% | 35.50% | LNFASAVR              | 2.42 | 992.5159 |
| ATP | 6018 | nucleoside diphosphate kinase NBR-A                                                                    | gi 1064897,gi 1153118,gi 1154923,gi 1196892,gi 1224069,gi 151556410,gi 169658382,gi 169658384,gi 1709243,gi 74354800                                                                  | 17,307.40 | 99.80%  | 2 | 2 | 2  | 0.02% | 19.10% | TFIAIKPDGVQR          | 1.82 | 1,344.76 |
| ATP | 6018 | nucleoside diphosphate kinase NBR-A                                                                    | gi 1064897,gi 1153118,gi 1154923,gi 1196892,gi 1224069,gi 151556410,gi 169658382,gi 169658384,gi 1709243,gi 74354800                                                                  | 17,307.40 | 99.80%  | 2 | 2 | 2  | 0.02% | 19.10% | VMLGETNPADSKPGTIR     | 3.85 | 1,801.91 |
| ATP | 6018 | YME1L1 protein                                                                                         | gi 151557121,gi 156120349                                                                                                                                                             | 80,044.00 | 100.00% | 4 | 4 | 4  | 0.03% | 8.79%  | GTVGFSGAELN LVNQAA LK | 4.69 | 2,018.06 |
| ATP | 6018 | YME1L1 protein                                                                                         | gi 151557121,gi 156120349                                                                                                                                                             | 80,044.00 | 100.00% | 4 | 4 | 4  | 0.03% | 8.79%  | IKFDQSV DPEIAR        | 2.97 | 1,630.88 |
| ATP | 6018 | YME1L1 protein                                                                                         | gi 151557121,gi 156120349                                                                                                                                                             | 80,044.00 | 100.00% | 4 | 4 | 4  | 0.03% | 8.79%  | LSPETQS AIEQEIR       | 3.06 | 1,600.82 |
| ATP | 6018 | YME1L1 protein                                                                                         | gi 151557121,gi 156120349                                                                                                                                                             | 80,044.00 | 100.00% | 4 | 4 | 4  | 0.03% | 8.79%  | TTTGLD SAVDPV QMK     | 4.08 | 1,578.77 |
| ATP | 6018 | RecName: Full=Vesicle-associated membrane protein 8; Short=VAMP-8                                      | gi 122140420,gi 74353894,gi 77735533                                                                                                                                                  | 11,339.40 | 99.80%  | 2 | 2 | 3  | 0.03% | 24.00% | NKTEDL EATSEHF K      | 4.82 | 1,648.78 |



|     |      |                                                                                                                                                                                                                                                                                                                          |           |         |   |   |   |       |        |                                 |      |          |
|-----|------|--------------------------------------------------------------------------------------------------------------------------------------------------------------------------------------------------------------------------------------------------------------------------------------------------------------------------|-----------|---------|---|---|---|-------|--------|---------------------------------|------|----------|
| ATP | 6018 | RecName gi 1221404 :<br>20,gi 74353<br>Full=Vesicle-associated<br>membrane protein 8;<br>Short=VAMP-8                                                                                                                                                                                                                    | 11,339.40 | 99.80%  | 2 | 2 | 3 | 0.03% | 24.00% | NLRDEV<br>EGVK                  | 3.24 | 1,158.61 |
| ATP | 6018 | RecName gi 1185973 :<br>73,gi 26418<br>Full=Annexin A1;<br>85,gi 73587<br>AltName: 269,gi 7385<br>Full=Annexin-1;<br>AltName:<br>Full=Annexin I;<br>AltName:<br>Full=Lipocortin I;<br>AltName:<br>Full=Calcipactin II;<br>AltName:<br>Full=Chromobindin-9;<br>AltName:<br>Full=p35;<br>AltName:<br>Full=Phospholipase A2 | 38,881.20 | 100.00% | 3 | 3 | 3 | 0.03% | 13.30% | GDRSEE<br>LAVNDD<br>LADSDA<br>R | 5.49 | 2,047.92 |
| ATP | 6018 | RecName gi 1185973 :<br>73,gi 26418<br>Full=Annexin A1;<br>85,gi 73587<br>AltName: 269,gi 7385<br>Full=Annexin-1;<br>AltName:<br>Full=Annexin I;<br>AltName:<br>Full=Lipocortin I;<br>AltName:<br>Full=Calcipactin II;<br>AltName:<br>Full=Chromobindin-9;<br>AltName:<br>Full=p35;<br>AltName:<br>Full=Phospholipase A2 | 38,881.20 | 100.00% | 3 | 3 | 3 | 0.03% | 13.30% | GLGTDE<br>DTLNEIL<br>ASR        | 3.87 | 1,703.84 |

|     |      |                                                                                                                                                                                                                                                                                                                                                                                |            |         |   |    |    |       |        |                                       |      |          |
|-----|------|--------------------------------------------------------------------------------------------------------------------------------------------------------------------------------------------------------------------------------------------------------------------------------------------------------------------------------------------------------------------------------|------------|---------|---|----|----|-------|--------|---------------------------------------|------|----------|
| ATP | 6018 | RecName gi 1185973 :<br>73.gi 26418<br>Full=Ann 2.gi 615530<br>exin A1; 85.gi 73587<br>AltName: 269.gi 7385<br>Full=Ann 3762.gi 74<br>exin-1;<br>AltName:<br>Full=Ann<br>exin I;<br>AltName:<br>Full=Lip<br>ocortin I;<br>AltName:<br>Full=Cal<br>pactin II;<br>AltName:<br>Full=Chr<br>omobindi<br>n-9;<br>AltName:<br>Full=p35;<br>AltName:<br>Full=Pho<br>spholipas<br>e A2 | 38,881.20  | 100.00% | 3 | 3  | 3  | 0.03% | 13.30% | TPAQFD<br>AEELR                       | 3.57 | 1,276.62 |
| ATP | 6018 | LRRRC8C gi 1487452<br>protein 86.gi 14964<br>2813                                                                                                                                                                                                                                                                                                                              | 92,305.20  | 100.00% | 7 | 10 | 11 | 0.09% | 13.60% | IEHFISIL<br>GK                        | 4.04 | 1,156.67 |
| ATP | 6018 | LRRRC8C gi 1487452<br>protein 86.gi 14964<br>2813                                                                                                                                                                                                                                                                                                                              | 92,305.20  | 100.00% | 7 | 10 | 11 | 0.09% | 13.60% | IPQAVV<br>DVSSHL<br>QK                | 4.49 | 1,520.84 |
| ATP | 6018 | LRRRC8C gi 1487452<br>protein 86.gi 14964<br>2813                                                                                                                                                                                                                                                                                                                              | 92,305.20  | 100.00% | 7 | 10 | 11 | 0.09% | 13.60% | LELPLIM<br>LSGLPDT<br>VFEITEL<br>QSLK | 5.12 | 2,815.54 |
| ATP | 6018 | LRRRC8C gi 1487452<br>protein 86.gi 14964<br>2813                                                                                                                                                                                                                                                                                                                              | 92,305.20  | 100.00% | 7 | 10 | 11 | 0.09% | 13.60% | NLEELY<br>LVGSL<br>HDIR               | 3.16 | 1,945.00 |
| ATP | 6018 | LRRRC8C gi 1487452<br>protein 86.gi 14964<br>2813                                                                                                                                                                                                                                                                                                                              | 92,305.20  | 100.00% | 7 | 10 | 11 | 0.09% | 13.60% | QETGID<br>DIPDVK                      | 3.24 | 1,329.65 |
| ATP | 6018 | LRRRC8C gi 1487452<br>protein 86.gi 14964<br>2813                                                                                                                                                                                                                                                                                                                              | 92,305.20  | 100.00% | 7 | 10 | 11 | 0.09% | 13.60% | SIEEIVSF<br>QHLR                      | 2.71 | 1,457.77 |
| ATP | 6018 | LRRRC8C gi 1487452<br>protein 86.gi 14964<br>2813                                                                                                                                                                                                                                                                                                                              | 92,305.20  | 100.00% | 7 | 10 | 11 | 0.09% | 13.60% | SNTTQS<br>GPEGSL<br>VNSQSL<br>K       | 5.24 | 1,933.95 |
| ATP | 6018 | PREDIC gi 1199117<br>TED: 77<br>similar to<br>MYB<br>binding<br>protein<br>1a                                                                                                                                                                                                                                                                                                  | 151,796.60 | 100.00% | 3 | 3  | 3  | 0.03% | 3.48%  | LMGPVN<br>LFSDENI<br>PR               | 3.28 | 1,717.86 |
| ATP | 6018 | PREDIC gi 1199117<br>TED: 77<br>similar to<br>MYB<br>binding<br>protein<br>1a                                                                                                                                                                                                                                                                                                  | 151,796.60 | 100.00% | 3 | 3  | 3  | 0.03% | 3.48%  | NVAPLT<br>AFTTQQ<br>R                 | 3.5  | 1,446.77 |
| ATP | 6018 | PREDIC gi 1199117<br>TED: 77<br>similar to<br>MYB<br>binding<br>protein<br>1a                                                                                                                                                                                                                                                                                                  | 151,796.60 | 100.00% | 3 | 3  | 3  | 0.03% | 3.48%  | QPENPL<br>VLELLEP<br>LLL VIR          | 2.83 | 2,198.32 |

|     |      |                                                                                                                                                         |                                      |           |         |   |   |   |       |        |                                 |          |
|-----|------|---------------------------------------------------------------------------------------------------------------------------------------------------------|--------------------------------------|-----------|---------|---|---|---|-------|--------|---------------------------------|----------|
| ATP | 6018 | MGAT1 protein                                                                                                                                           | gi 154426138,gi 59858237,gi 62751783 | 51,684.70 | 100.00% | 4 | 4 | 4 | 0.03% | 11.60% | GIVSFLY 2.49 R                  | 954.5407 |
| ATP | 6018 | MGAT1 protein                                                                                                                                           | gi 154426138,gi 59858237,gi 62751783 | 51,684.70 | 100.00% | 4 | 4 | 4 | 0.03% | 11.60% | LNQHFV 4.28 PFTQLDL SYLR        | 2,091.10 |
| ATP | 6018 | MGAT1 protein                                                                                                                                           | gi 154426138,gi 59858237,gi 62751783 | 51,684.70 | 100.00% | 4 | 4 | 4 | 0.03% | 11.60% | LPSDSAL 4.86 DDDPAS LTR         | 1,672.80 |
| ATP | 6018 | MGAT1 protein                                                                                                                                           | gi 154426138,gi 59858237,gi 62751783 | 51,684.70 | 100.00% | 4 | 4 | 4 | 0.03% | 11.60% | VYGAPL 2.42 LQVEK               | 1,216.69 |
| ATP | 6018 | ribosomal protein S14                                                                                                                                   | gi 118150778,gi 28189929,gi 74268249 | 16,758.50 | 99.80%  | 2 | 3 | 3 | 0.03% | 14.60% | ADRDES 3.41 SPYAAM LAAQDV AQR   | 2,281.05 |
| ATP | 6018 | ribosomal protein S14                                                                                                                                   | gi 118150778,gi 28189929,gi 74268249 | 16,758.50 | 99.80%  | 2 | 3 | 3 | 0.03% | 14.60% | VKADRD 3.84 ESSPYA AMLAAQ DVAQR | 2,508.21 |
| ATP | 6018 | PREDIC TED: similar to Thioredoxin domain-containing protein 5 precursor (Thioredoxin-like protein p46) (Endoplasmic reticulum protein ERp46) isoform 1 | gi 119915902                         | 45,792.10 | 100.00% | 3 | 3 | 5 | 0.04% | 8.37%  | FFKPGQ 3.22 EAVK                | 1,150.63 |
| ATP | 6018 | PREDIC TED: similar to Thioredoxin domain-containing protein 5 precursor (Thioredoxin-like protein p46) (Endoplasmic reticulum protein ERp46) isoform 1 | gi 119915902                         | 45,792.10 | 100.00% | 3 | 3 | 5 | 0.04% | 8.37%  | GYPTLL 2.63 LFR                 | 1,079.62 |

|     |      |                                                                                                                                                                                                                             |                                            |           |         |   |   |    |       |        |                               |          |
|-----|------|-----------------------------------------------------------------------------------------------------------------------------------------------------------------------------------------------------------------------------|--------------------------------------------|-----------|---------|---|---|----|-------|--------|-------------------------------|----------|
| ATP | 6018 | PREDICTED:<br>similar to<br>Thioredoxin<br>domain-<br>containing<br>protein<br>5<br>precursor<br>(Thioredoxin-like<br>protein<br>p46)<br>(Endoplasmic<br>reticulum<br>protein<br>ERp46)<br>isoform 1                        | gi 1199159                                 | 45,792.10 | 100.00% | 3 | 3 | 5  | 0.04% | 8.37%  | VDCTQH 3.25<br>YELCSG<br>NQVR | 1,851.81 |
| ATP | 6018 | RecName:<br>Full=Translocator<br>associated<br>protein<br>subunit<br>delta;<br>Short=TRAP-<br>delta;<br>AltName:<br>Full=Signal<br>sequence<br>receptor<br>subunit<br>delta;<br>Short=SSR-<br>delta;<br>Flags:<br>Precursor | gi 1221371<br>: 13,gi 83638<br>548,gi 8437 | 18,796.20 | 100.00% | 3 | 4 | 16 | 0.14% | 25.00% | FFDEESY 3.59<br>SLLR          | 1,405.66 |

|     |      |                                                                                                                                                                                                                                                        |         |           |         |   |   |    |       |        |                                  |          |
|-----|------|--------------------------------------------------------------------------------------------------------------------------------------------------------------------------------------------------------------------------------------------------------|---------|-----------|---------|---|---|----|-------|--------|----------------------------------|----------|
| ATP | 6018 | RecName gi 1221371<br>:<br>Full=Tra<br>nslocon-<br>associate<br>d protein<br>subunit<br>delta;<br>Short=T<br>RAP-<br>delta;<br>AltName:<br>Full=Sig<br>nal<br>sequence<br>receptor<br>subunit<br>delta;<br>Short=SS<br>R-delta;<br>Flags:<br>Precursor | 1221371 | 18,796.20 | 100.00% | 3 | 4 | 16 | 0.14% | 25.00% | NNEDVS 4.94<br>VIPPLFT<br>VSVDHR | 2,138.09 |
| ATP | 6018 | RecName gi 1221371<br>:<br>Full=Tra<br>nslocon-<br>associate<br>d protein<br>subunit<br>delta;<br>Short=T<br>RAP-<br>delta;<br>AltName:<br>Full=Sig<br>nal<br>sequence<br>receptor<br>subunit<br>delta;<br>Short=SS<br>R-delta;<br>Flags:<br>Precursor | 1221371 | 18,796.20 | 100.00% | 3 | 4 | 16 | 0.14% | 25.00% | VQNMAL 4.85<br>YADVSG<br>K       | 1,411.69 |

|     |      |                                                                                                                                                                                                                                                                                         |           |         |   |   |   |       |       |                                 |          |
|-----|------|-----------------------------------------------------------------------------------------------------------------------------------------------------------------------------------------------------------------------------------------------------------------------------------------|-----------|---------|---|---|---|-------|-------|---------------------------------|----------|
| ATP | 6018 | RecName gi 1089359 :<br>97.gi 74268<br>Full=Seri 173.gi 7773<br>ne 5519<br>hydroxy<br>methyltra<br>nsferase,<br>mitochon<br>drial;<br>Short=S<br>HMT;<br>Short=Se<br>rine<br>methylas<br>e;<br>AltName:<br>Full=Gly<br>cine<br>hydroxy<br>methyltra<br>nsferase;<br>Flags:<br>Precursor | 55,589.20 | 100.00% | 3 | 3 | 3 | 0.03% | 7.94% | LIIAGTS 3.06<br>AYAR            | 1,135.65 |
| ATP | 6018 | RecName gi 1089359 :<br>97.gi 74268<br>Full=Seri 173.gi 7773<br>ne 5519<br>hydroxy<br>methyltra<br>nsferase,<br>mitochon<br>drial;<br>Short=S<br>HMT;<br>Short=Se<br>rine<br>methylas<br>e;<br>AltName:<br>Full=Gly<br>cine<br>hydroxy<br>methyltra<br>nsferase;<br>Flags:<br>Precursor | 55,589.20 | 100.00% | 3 | 3 | 3 | 0.03% | 7.94% | LNPQTG 4.04<br>LIDYDQL<br>ALTAR | 2,002.06 |

|     |      |                                                                                                                                                                                                                                                                                         |           |         |   |   |   |       |        |                                           |          |
|-----|------|-----------------------------------------------------------------------------------------------------------------------------------------------------------------------------------------------------------------------------------------------------------------------------------------|-----------|---------|---|---|---|-------|--------|-------------------------------------------|----------|
| ATP | 6018 | RecName gi 1089359 :<br>97.gi 74268<br>Full=Seri 173.gi 7773<br>ne 5519<br>hydroxy<br>methyltra<br>nsferase,<br>mitochon<br>drial;<br>Short=S<br>HMT;<br>Short=Se<br>rine<br>methylas<br>e;<br>AltName:<br>Full=Gly<br>cine<br>hydroxy<br>methyltra<br>nsferase;<br>Flags:<br>Precursor | 55,589.20 | 100.00% | 3 | 3 | 3 | 0.03% | 7.94%  | VLELVSI 4.42<br>TANK                      | 1,186.70 |
| ATP | 6018 | Translocase of gi 1153050<br>42.gi 11549<br>outer 6634<br>mitochon<br>drial<br>membran<br>e 70<br>homolog<br>A (S.<br>cerevisiae<br>)                                                                                                                                                   | 67,553.40 | 100.00% | 6 | 7 | 8 | 0.07% | 14.40% | ASPAPGS 2.64<br>GHPDGP<br>GTHLEM<br>NSLDR | 2,416.10 |
| ATP | 6018 | Translocase of gi 1153050<br>42.gi 11549<br>outer 6634<br>mitochon<br>drial<br>membran<br>e 70<br>homolog<br>A (S.<br>cerevisiae<br>)                                                                                                                                                   | 67,553.40 | 100.00% | 6 | 7 | 8 | 0.07% | 14.40% | LRPESAL 3.39<br>AQAQK                     | 1,311.74 |
| ATP | 6018 | Translocase of gi 1153050<br>42.gi 11549<br>outer 6634<br>mitochon<br>drial<br>membran<br>e 70<br>homolog<br>A (S.<br>cerevisiae<br>)                                                                                                                                                   | 67,553.40 | 100.00% | 6 | 7 | 8 | 0.07% | 14.40% | NVDLST 3.13<br>FYQNR                      | 1,356.65 |
| ATP | 6018 | Translocase of gi 1153050<br>42.gi 11549<br>outer 6634<br>mitochon<br>drial<br>membran<br>e 70<br>homolog<br>A (S.<br>cerevisiae<br>)                                                                                                                                                   | 67,553.40 | 100.00% | 6 | 7 | 8 | 0.07% | 14.40% | SDEKDK 3.71<br>KEGEAL<br>EVK              | 1,691.80 |

|     |      |                                                                          |                                      |           |         |   |   |   |       |        |                                                                  |      |          |
|-----|------|--------------------------------------------------------------------------|--------------------------------------|-----------|---------|---|---|---|-------|--------|------------------------------------------------------------------|------|----------|
| ATP | 6018 | Translocase of outer mitochondrial membrane 70 homolog A (S. cerevisiae) | gi 115305042,gi 115496634            | 67,553.40 | 100.00% | 6 | 7 | 8 | 0.07% | 14.40% | SYFSSFT<br>DDIISQP<br>MLK                                        | 2.19 | 1,994.94 |
| ATP | 6018 | Translocase of outer mitochondrial membrane 70 homolog A (S. cerevisiae) | gi 115305042,gi 115496634            | 67,553.40 | 100.00% | 6 | 7 | 8 | 0.07% | 14.40% | YMAEAL<br>LLR                                                    | 2.54 | 1,095.59 |
| ATP | 6018 | RecName : Full=Protable saccharopine dehydrogenase                       | gi 122140337,gi 74354153,gi 77735529 | 47,302.40 | 99.80%  | 2 | 2 | 2 | 0.02% | 13.30% | LGRPTLS<br>SEVGIIC<br>DITNPAS<br>LDEMAK<br>QATVVV<br>NCVGPY<br>R | 3.46 | 4,360.24 |
| ATP | 6018 | RecName : Full=Protable saccharopine dehydrogenase                       | gi 122140337,gi 74354153,gi 77735529 | 47,302.40 | 99.80%  | 2 | 2 | 2 | 0.02% | 13.30% | LRNESD<br>MKPVPI<br>VGPK                                         | 2.42 | 1,795.97 |
| ATP | 6018 | lysosomal-associated membrane protein 2 isoform 1                        | gi 164420738,gi 74353978,gi 77736087 | 44,524.90 | 100.00% | 3 | 3 | 5 | 0.04% | 5.16%  | IPLNDIF<br>R                                                     | 3.28 | 987.5623 |
| ATP | 6018 | lysosomal-associated membrane protein 2 isoform 1                        | gi 164420738,gi 74353978,gi 77736087 | 44,524.90 | 100.00% | 3 | 3 | 5 | 0.04% | 5.16%  | VALKIPL<br>NDIFR                                                 | 3.61 | 1,398.85 |
| ATP | 6018 | lysosomal-associated membrane protein 2 isoform 1                        | gi 164420738,gi 74353978,gi 77736087 | 44,524.90 | 100.00% | 3 | 3 | 5 | 0.04% | 5.16%  | YLDFVF<br>AVK                                                    | 2.8  | 1,101.60 |
| ATP | 6018 | Nicastrin                                                                | gi 74267600,gi 77735901              | 79,055.00 | 99.80%  | 2 | 2 | 2 | 0.02% | 2.65%  | ALAGVA<br>TVLAR                                                  | 3.36 | 1,041.64 |
| ATP | 6018 | Nicastrin                                                                | gi 74267600,gi 77735901              | 79,055.00 | 99.80%  | 2 | 2 | 2 | 0.02% | 2.65%  | LLYGFL<br>VR                                                     | 2.18 | 980.5928 |



|     |      |                                                                                                                                                                                                          |                                                                                                                  |           |         |   |   |   |       |        |                                       |          |
|-----|------|----------------------------------------------------------------------------------------------------------------------------------------------------------------------------------------------------------|------------------------------------------------------------------------------------------------------------------|-----------|---------|---|---|---|-------|--------|---------------------------------------|----------|
| ATP | 6018 | RecName<br>:<br>Full=AT<br>P<br>synthase<br>subunit<br>O,<br>mitochon<br>drial;<br>AltName:<br>Full=Olig<br>omycin<br>sensitivit<br>y<br>conferral<br>protein;<br>Short=O<br>SCP;<br>Flags:<br>Precursor | gi 1438113<br>65,gi 15788<br>1386,gi 159<br>164706,gi 1<br>63451,gi 27<br>806307,gi 2<br>8189911,gi <br>74268299 | 13,204.80 | 99.80%  | 2 | 2 | 3 | 0.03% | 25.80% | FSPLTSN 2.76<br>LINLLAE<br>NGR        | 1,859.00 |
| ATP | 6018 | RecName<br>:<br>Full=AT<br>P<br>synthase<br>subunit<br>O,<br>mitochon<br>drial;<br>AltName:<br>Full=Olig<br>omycin<br>sensitivit<br>y<br>conferral<br>protein;<br>Short=O<br>SCP;<br>Flags:<br>Precursor | gi 1438113<br>65,gi 15788<br>1386,gi 159<br>164706,gi 1<br>63451,gi 27<br>806307,gi 2<br>8189911,gi <br>74268299 | 13,204.80 | 99.80%  | 2 | 2 | 3 | 0.03% | 25.80% | LVRPPV 3.68<br>QIYGIEG<br>R           | 1,596.92 |
| ATP | 6018 | G-protein<br>gamma-<br>12<br>subunit                                                                                                                                                                     | gi 1109682,<br>gi 1487439<br>56,gi 15866<br>81,gi 24949<br>18,gi 27807<br>509                                    | 8,039.60  | 99.80%  | 2 | 2 | 2 | 0.02% | 26.40% | NDPLLM 3.09<br>GIPTSEN<br>PFK         | 1,788.88 |
| ATP | 6018 | G-protein<br>gamma-<br>12<br>subunit                                                                                                                                                                     | gi 1109682,<br>gi 1487439<br>56,gi 15866<br>81,gi 24949<br>18,gi 27807<br>509                                    | 8,039.60  | 99.80%  | 2 | 2 | 2 | 0.02% | 26.40% | NDPLLM 2.07<br>GIPTSEN<br>PFKDKK      | 2,160.10 |
| ATP | 6018 | PGRMC<br>2 protein                                                                                                                                                                                       | gi 1487449<br>19,gi 14964<br>2895                                                                                | 23,693.20 | 100.00% | 4 | 4 | 9 | 0.08% | 18.80% | DFSLEQL 2.5<br>R                      | 1,007.52 |
| ATP | 6018 | PGRMC<br>2 protein                                                                                                                                                                                       | gi 1487449<br>19,gi 14964<br>2895                                                                                | 23,693.20 | 100.00% | 4 | 4 | 9 | 0.08% | 18.80% | FYGPAG 3.64<br>PYGIFAG<br>R           | 1,472.73 |
| ATP | 6018 | PGRMC<br>2 protein                                                                                                                                                                                       | gi 1487449<br>19,gi 14964<br>2895                                                                                | 23,693.20 | 100.00% | 4 | 4 | 9 | 0.08% | 18.80% | GLGAGA 4.68<br>GAGEES<br>PAASLPR      | 1,667.83 |
| ATP | 6018 | PGRMC<br>2 protein                                                                                                                                                                                       | gi 1487449<br>19,gi 14964<br>2895                                                                                | 23,693.20 | 100.00% | 4 | 4 | 9 | 0.08% | 18.80% | RGLGAG 4.29<br>AGAGEE<br>SPAASLP<br>R | 1,823.94 |

|     |      |                                                            |                  |            |         |    |    |    |       |        |                                               |      |          |
|-----|------|------------------------------------------------------------|------------------|------------|---------|----|----|----|-------|--------|-----------------------------------------------|------|----------|
| ATP | 6018 | PREDIC<br>TED:<br>similar to<br>myoferlin<br>isoform<br>12 | gi 1946789<br>41 | 234,648.00 | 100.00% | 25 | 33 | 45 | 0.38% | 19.90% | AEDIPQ<br>MDDAFS<br>QTVK                      | 2.72 | 1,810.82 |
| ATP | 6018 | PREDIC<br>TED:<br>similar to<br>myoferlin<br>isoform<br>12 | gi 1946789<br>41 | 234,648.00 | 100.00% | 25 | 33 | 45 | 0.38% | 19.90% | ALSQIHE<br>AAVR                               | 4.09 | 1,194.66 |
| ATP | 6018 | PREDIC<br>TED:<br>similar to<br>myoferlin<br>isoform<br>12 | gi 1946789<br>41 | 234,648.00 | 100.00% | 25 | 33 | 45 | 0.38% | 19.90% | DQLKPT<br>QLLQNV<br>AR                        | 3.99 | 1,623.92 |
| ATP | 6018 | PREDIC<br>TED:<br>similar to<br>myoferlin<br>isoform<br>12 | gi 1946789<br>41 | 234,648.00 | 100.00% | 25 | 33 | 45 | 0.38% | 19.90% | FGKPDPI<br>VSVIFKD<br>EK                      | 3.63 | 1,819.00 |
| ATP | 6018 | PREDIC<br>TED:<br>similar to<br>myoferlin<br>isoform<br>12 | gi 1946789<br>41 | 234,648.00 | 100.00% | 25 | 33 | 45 | 0.38% | 19.90% | GKSDEN<br>EDPSVV<br>GEFK                      | 3.68 | 1,736.80 |
| ATP | 6018 | PREDIC<br>TED:<br>similar to<br>myoferlin<br>isoform<br>12 | gi 1946789<br>41 | 234,648.00 | 100.00% | 25 | 33 | 45 | 0.38% | 19.90% | GNNPFF<br>DELFFY<br>NVHLTP<br>SELMDEI<br>ISIR | 5    | 3,473.67 |
| ATP | 6018 | PREDIC<br>TED:<br>similar to<br>myoferlin<br>isoform<br>12 | gi 1946789<br>41 | 234,648.00 | 100.00% | 25 | 33 | 45 | 0.38% | 19.90% | IDVGFV<br>YDEPGH<br>AVMR                      | 4.13 | 1,820.86 |
| ATP | 6018 | PREDIC<br>TED:<br>similar to<br>myoferlin<br>isoform<br>12 | gi 1946789<br>41 | 234,648.00 | 100.00% | 25 | 33 | 45 | 0.38% | 19.90% | ILHQHLG<br>PPEER                              | 3.39 | 1,425.76 |
| ATP | 6018 | PREDIC<br>TED:<br>similar to<br>myoferlin<br>isoform<br>12 | gi 1946789<br>41 | 234,648.00 | 100.00% | 25 | 33 | 45 | 0.38% | 19.90% | ILVELST<br>LLEK                               | 3.72 | 1,257.77 |
| ATP | 6018 | PREDIC<br>TED:<br>similar to<br>myoferlin<br>isoform<br>12 | gi 1946789<br>41 | 234,648.00 | 100.00% | 25 | 33 | 45 | 0.38% | 19.90% | IPAHQVL<br>YSTSGG<br>DASGK                    | 5.31 | 1,787.89 |
| ATP | 6018 | PREDIC<br>TED:<br>similar to<br>myoferlin<br>isoform<br>12 | gi 1946789<br>41 | 234,648.00 | 100.00% | 25 | 33 | 45 | 0.38% | 19.90% | IYRAEDI<br>PQMDDA<br>FSQTVK                   | 3.81 | 2,243.07 |

|     |      |                                                            |                  |            |         |    |    |    |       |        |                                     |      |          |
|-----|------|------------------------------------------------------------|------------------|------------|---------|----|----|----|-------|--------|-------------------------------------|------|----------|
| ATP | 6018 | PREDIC<br>TED:<br>similar to<br>myoferlin<br>isoform<br>12 | gi 1946789<br>41 | 234,648.00 | 100.00% | 25 | 33 | 45 | 0.38% | 19.90% | LDVANT<br>LLVMAE<br>R               | 3.94 | 1,460.78 |
| ATP | 6018 | PREDIC<br>TED:<br>similar to<br>myoferlin<br>isoform<br>12 | gi 1946789<br>41 | 234,648.00 | 100.00% | 25 | 33 | 45 | 0.38% | 19.90% | NDVVG<br>TYLHLS<br>K                | 3.98 | 1,446.76 |
| ATP | 6018 | PREDIC<br>TED:<br>similar to<br>myoferlin<br>isoform<br>12 | gi 1946789<br>41 | 234,648.00 | 100.00% | 25 | 33 | 45 | 0.38% | 19.90% | NLGPPG<br>PPFNITP<br>R              | 3.22 | 1,476.80 |
| ATP | 6018 | PREDIC<br>TED:<br>similar to<br>myoferlin<br>isoform<br>12 | gi 1946789<br>41 | 234,648.00 | 100.00% | 25 | 33 | 45 | 0.38% | 19.90% | NLMALD<br>KDSFSD<br>PYAHVS<br>FLHR  | 3.75 | 2,579.23 |
| ATP | 6018 | PREDIC<br>TED:<br>similar to<br>myoferlin<br>isoform<br>12 | gi 1946789<br>41 | 234,648.00 | 100.00% | 25 | 33 | 45 | 0.38% | 19.90% | NLVDPF<br>VEVSFA<br>GK              | 3.37 | 1,521.79 |
| ATP | 6018 | PREDIC<br>TED:<br>similar to<br>myoferlin<br>isoform<br>12 | gi 1946789<br>41 | 234,648.00 | 100.00% | 25 | 33 | 45 | 0.38% | 19.90% | SLLTEA<br>DAGHTE<br>FTDEVY<br>QNESR | 6.04 | 2,612.17 |
| ATP | 6018 | PREDIC<br>TED:<br>similar to<br>myoferlin<br>isoform<br>12 | gi 1946789<br>41 | 234,648.00 | 100.00% | 25 | 33 | 45 | 0.38% | 19.90% | TLHSSFQ<br>PNISQGR                  | 3.93 | 1,571.79 |
| ATP | 6018 | PREDIC<br>TED:<br>similar to<br>myoferlin<br>isoform<br>12 | gi 1946789<br>41 | 234,648.00 | 100.00% | 25 | 33 | 45 | 0.38% | 19.90% | TQGLVP<br>EHVETR                    | 2.68 | 1,365.71 |
| ATP | 6018 | PREDIC<br>TED:<br>similar to<br>myoferlin<br>isoform<br>12 | gi 1946789<br>41 | 234,648.00 | 100.00% | 25 | 33 | 45 | 0.38% | 19.90% | VENTLE<br>VLNEKE<br>ADERPA<br>GK    | 4.4  | 2,274.13 |
| ATP | 6018 | PREDIC<br>TED:<br>similar to<br>myoferlin<br>isoform<br>12 | gi 1946789<br>41 | 234,648.00 | 100.00% | 25 | 33 | 45 | 0.38% | 19.90% | VFLPKEE<br>LYMPPL<br>VIK            | 3.93 | 1,932.09 |
| ATP | 6018 | PREDIC<br>TED:<br>similar to<br>myoferlin<br>isoform<br>12 | gi 1946789<br>41 | 234,648.00 | 100.00% | 25 | 33 | 45 | 0.38% | 19.90% | VIEDRD<br>NYIPNTL<br>NPVFGR         | 3.03 | 2,232.14 |

|     |      |                                                                                                                                                                                    |                                                 |            |         |    |    |    |       |        |                                                                 |      |          |
|-----|------|------------------------------------------------------------------------------------------------------------------------------------------------------------------------------------|-------------------------------------------------|------------|---------|----|----|----|-------|--------|-----------------------------------------------------------------|------|----------|
| ATP | 6018 | PREDICTED:<br>similar to myoferlin isoform 12                                                                                                                                      | gi 1946789<br>41                                | 234,648.00 | 100.00% | 25 | 33 | 45 | 0.38% | 19.90% | VIIELFD<br>NDQVGK<br>DEFLGR                                     | 5.77 | 2,207.13 |
| ATP | 6018 | PREDICTED:<br>similar to myoferlin isoform 12                                                                                                                                      | gi 1946789<br>41                                | 234,648.00 | 100.00% | 25 | 33 | 45 | 0.38% | 19.90% | VIVESAS<br>NIPK                                                 | 3.22 | 1,156.66 |
| ATP | 6018 | PREDICTED:<br>similar to myoferlin isoform 12                                                                                                                                      | gi 1946789<br>41                                | 234,648.00 | 100.00% | 25 | 33 | 45 | 0.38% | 19.90% | VSMFVL<br>GTGDEP<br>PPEKQD<br>RDNDSD<br>DVESNL<br>LLPAGIA<br>LR | 4.06 | 4,226.06 |
| ATP | 6018 | TXNDC1 3 protein                                                                                                                                                                   | gi 1488784<br>48,gi 14964<br>2897               | 38,865.40  | 100.00% | 3  | 3  | 3  | 0.03% | 12.10% | FFVTTLTP<br>AFFHAK                                              | 2.93 | 1,525.82 |
| ATP | 6018 | TXNDC1 3 protein                                                                                                                                                                   | gi 1488784<br>48,gi 14964<br>2897               | 38,865.40  | 100.00% | 3  | 3  | 3  | 0.03% | 12.10% | VDVIQEP<br>GLSGR                                                | 3.47 | 1,269.68 |
| ATP | 6018 | TXNDC1 3 protein                                                                                                                                                                   | gi 1488784<br>48,gi 14964<br>2897               | 38,865.40  | 100.00% | 3  | 3  | 3  | 0.03% | 12.10% | YRGPV<br>YEDLQN<br>YILEK                                        | 5.05 | 2,057.03 |
| ATP | 6018 | OCTD1 domain containing 1                                                                                                                                                          | gi 5985850<br>9,gi 627518<br>43,gi 75040<br>205 | 27,811.90  | 100.00% | 3  | 4  | 5  | 0.04% | 23.50% | ADFREP<br>NAEVPR<br>PIPHGA<br>DYIPTTE<br>ER                     | 3.25 | 3,218.59 |
| ATP | 6018 | OCTD1 domain containing 1                                                                                                                                                          | gi 5985850<br>9,gi 627518<br>43,gi 75040<br>205 | 27,811.90  | 100.00% | 3  | 4  | 5  | 0.04% | 23.50% | NRESYE<br>VTLTHK                                                | 3.27 | 1,476.74 |
| ATP | 6018 | OCTD1 domain containing 1                                                                                                                                                          | gi 5985850<br>9,gi 627518<br>43,gi 75040<br>205 | 27,811.90  | 100.00% | 3  | 4  | 5  | 0.04% | 23.50% | SVPLAA<br>TSMLITQ<br>GLISK                                      | 3.5  | 1,846.04 |
| ATP | 6018 | RecName: Full=Myosin-10; AltName: Full=Myosin heavy chain 10; AltName: Full=Myosin heavy chain, non-muscle IIb; AltName: Full=Non-muscle myosin heavy chain IIb; Short=NMMHC II-b; | gi 1343170<br>6,gi 278073<br>25,gi 41157<br>48  | 229,087.40 | 100.00% | 3  | 3  | 3  | 0.03% | 3.59%  | KFDQLL<br>AEEK                                                  | 3.02 | 1,220.65 |

|     |      |                                                                                                                                                                                                                                                                      |            |            |         |   |   |   |       |       |                          |      |          |
|-----|------|----------------------------------------------------------------------------------------------------------------------------------------------------------------------------------------------------------------------------------------------------------------------|------------|------------|---------|---|---|---|-------|-------|--------------------------|------|----------|
| ATP | 6018 | RecName<br>:<br>Full=My<br>osin-10;<br>AltName:<br>Full=My<br>osin<br>heavy<br>chain 10;<br>AltName:<br>Full=My<br>osin<br>heavy<br>chain,<br>non-<br>muscle<br>IIb;<br>AltName:<br>Full=Non-<br>muscle<br>myosin<br>heavy<br>chain IIb;<br>Short=N<br>MMHC<br>II-b; | gij1343170 | 229,087.40 | 100.00% | 3 | 3 | 3 | 0.03% | 3.59% | LDPHLV<br>LDQLR          | 2.29 | 1,318.75 |
| ATP | 6018 | RecName<br>:<br>Full=My<br>osin-10;<br>AltName:<br>Full=My<br>osin<br>heavy<br>chain 10;<br>AltName:<br>Full=My<br>osin<br>heavy<br>chain,<br>non-<br>muscle<br>IIb;<br>AltName:<br>Full=Non-<br>muscle<br>myosin<br>heavy<br>chain IIb;<br>Short=N<br>MMHC<br>II-b; | gij1343170 | 229,087.40 | 100.00% | 3 | 3 | 3 | 0.03% | 3.59% | LQQELD<br>DLLVDL<br>DHQR | 2.36 | 1,949.99 |

|     |      |                                                                                                                                                                                                                                                                      |                                          |            |         |   |   |   |       |        |                                    |      |          |
|-----|------|----------------------------------------------------------------------------------------------------------------------------------------------------------------------------------------------------------------------------------------------------------------------|------------------------------------------|------------|---------|---|---|---|-------|--------|------------------------------------|------|----------|
| ATP | 6018 | RecName<br>:<br>Full=My<br>osin-10;<br>AltName:<br>Full=My<br>osin<br>heavy<br>chain 10;<br>AltName:<br>Full=My<br>osin<br>heavy<br>chain,<br>non-<br>muscle<br>IIb;<br>AltName:<br>Full=Non-<br>muscle<br>myosin<br>heavy<br>chain IIb;<br>Short=N<br>MMHC<br>II-b; | gi 1343170<br>6,gi 278073<br>25,gi 41157 | 229,087.40 | 100.00% | 3 | 3 | 3 | 0.03% | 3.59%  | LQQLFN<br>HTMFILE<br>QEYQR         | 3.03 | 2,483.20 |
| ATP | 6018 | RecName<br>:<br>Full=My<br>osin-10;<br>AltName:<br>Full=My<br>osin<br>heavy<br>chain 10;<br>AltName:<br>Full=My<br>osin<br>heavy<br>chain,<br>non-<br>muscle<br>IIb;<br>AltName:<br>Full=Non-<br>muscle<br>myosin<br>heavy<br>chain IIb;<br>Short=N<br>MMHC<br>II-b; | gi 1343170<br>6,gi 278073<br>25,gi 41157 | 229,087.40 | 100.00% | 3 | 3 | 3 | 0.03% | 3.59%  | SSLQEQ<br>QEEEE<br>ARR             | 1.96 | 1,847.84 |
| ATP | 6018 | Na-K-Cl<br>cotranspo<br>rter                                                                                                                                                                                                                                         | gi 2264408,<br>gi 2780751                | 130,380.80 | 99.80%  | 2 | 2 | 2 | 0.02% | 2.83%  | LQEGLDI<br>SHLQGQ<br>EELLSSQ<br>EK | 4.36 | 2,481.25 |
| ATP | 6018 | Na-K-Cl<br>cotranspo<br>rter                                                                                                                                                                                                                                         | gi 2264408,<br>gi 2780751                | 130,380.80 | 99.80%  | 2 | 2 | 2 | 0.02% | 2.83%  | TFGHNT<br>MDAVPR                   | 2.51 | 1,361.63 |
| ATP | 6018 | RecName<br>:<br>Full=Het<br>erogeneo<br>us<br>nuclear<br>ribonucle<br>oprotein<br>K;<br>Short=hn<br>RNP K                                                                                                                                                            | gi 1088607<br>77,gi 74354<br>615,gi 7773 | 51,003.40  | 100.00% | 5 | 5 | 8 | 0.07% | 20.70% | GSYGDL<br>GGPIITT<br>QVTIPK        | 5.56 | 1,917.03 |

|     |      |                                                                                                           |                                                                 |           |         |   |   |   |       |        |                                                         |      |          |
|-----|------|-----------------------------------------------------------------------------------------------------------|-----------------------------------------------------------------|-----------|---------|---|---|---|-------|--------|---------------------------------------------------------|------|----------|
| ATP | 6018 | RecName<br>:<br>Full=Het<br>erogeneo<br>us<br>nuclear<br>ribonucle<br>oprotein<br>K;<br>Short=hn<br>RNP K | gi 1088607<br>77,gi 74354<br>615,gi 7773<br>6071                | 51,003.40 | 100.00% | 5 | 5 | 8 | 0.07% | 20.70% | IDEPLEG<br>SEDRIITI<br>TGTQDQ<br>IQNAQY<br>LLQNSV<br>K  | 6.05 | 3,829.95 |
| ATP | 6018 | RecName<br>:<br>Full=Het<br>erogeneo<br>us<br>nuclear<br>ribonucle<br>oprotein<br>K;<br>Short=hn<br>RNP K | gi 1088607<br>77,gi 74354<br>615,gi 7773<br>6071                | 51,003.40 | 100.00% | 5 | 5 | 8 | 0.07% | 20.70% | IILDLISE<br>SPIK                                        | 3.89 | 1,340.80 |
| ATP | 6018 | RecName<br>:<br>Full=Het<br>erogeneo<br>us<br>nuclear<br>ribonucle<br>oprotein<br>K;<br>Short=hn<br>RNP K | gi 1088607<br>77,gi 74354<br>615,gi 7773<br>6071                | 51,003.40 | 100.00% | 5 | 5 | 8 | 0.07% | 20.70% | RPAEDM<br>EEEQAF<br>KR                                  | 4.48 | 1,751.80 |
| ATP | 6018 | RecName<br>:<br>Full=Het<br>erogeneo<br>us<br>nuclear<br>ribonucle<br>oprotein<br>K;<br>Short=hn<br>RNP K | gi 1088607<br>77,gi 74354<br>615,gi 7773<br>6071                | 51,003.40 | 100.00% | 5 | 5 | 8 | 0.07% | 20.70% | TDYNAS<br>VSVPS<br>SGPER                                | 2.76 | 1,780.80 |
| ATP | 6018 | myristoyl<br>ated<br>alanine-<br>rich<br>protein<br>kinase C<br>substrate                                 | gi 1154954<br>97,gi 14887<br>2484,gi 163<br>340,gi 9453<br>4743 | 31,960.80 | 99.80%  | 2 | 3 | 4 | 0.03% | 6.87%  | GEATAE<br>RPGEAA<br>VASSPS<br>K                         | 4.59 | 1,814.89 |
| ATP | 6018 | myristoyl<br>ated<br>alanine-<br>rich<br>protein<br>kinase C<br>substrate                                 | gi 1154954<br>97,gi 14887<br>2484,gi 163<br>340,gi 9453<br>4743 | 31,960.80 | 99.80%  | 2 | 3 | 4 | 0.03% | 6.87%  | TAAKGE<br>ATAERP<br>GEAAVA<br>SSPSK                     | 3.92 | 2,186.10 |
| ATP | 6018 | RecName<br>:<br>Full=Dna<br>J<br>homolog<br>subfamily<br>C<br>member<br>11                                | gi 1108081<br>98,gi 11405<br>0887,gi 847<br>08894               | 63,220.40 | 100.00% | 3 | 3 | 3 | 0.03% | 12.20% | GTISVGI<br>DATDLF<br>DRYEEE<br>YEDVSG<br>SGFPQIEI<br>NK | 4.72 | 3,893.82 |

|     |      |                                                                            |                                                   |           |         |    |    |    |       |        |                                 |          |
|-----|------|----------------------------------------------------------------------------|---------------------------------------------------|-----------|---------|----|----|----|-------|--------|---------------------------------|----------|
| ATP | 6018 | RecName<br>:<br>Full=Dna<br>J<br>homolog<br>subfamily<br>C<br>member<br>11 | gi 1108081<br>98,gi 11405<br>0887,gi 847<br>08894 | 63,220.40 | 100.00% | 3  | 3  | 3  | 0.03% | 12.20% | GVLHQV 3.38<br>MALDSE<br>ALR    | 1,654.86 |
| ATP | 6018 | RecName<br>:<br>Full=Dna<br>J<br>homolog<br>subfamily<br>C<br>member<br>11 | gi 1108081<br>98,gi 11405<br>0887,gi 847<br>08894 | 63,220.40 | 100.00% | 3  | 3  | 3  | 0.03% | 12.20% | LFNLVH 4.32<br>QAYEVL<br>SDPQTR | 2,130.10 |
| ATP | 6018 | vascular<br>endotheli<br>al<br>cadherin<br>precursor                       | gi 3430529<br>9,gi 486753<br>81,gi 75071<br>940   | 87,450.60 | 100.00% | 11 | 16 | 24 | 0.21% | 14.20% | FKMLAE 3.09<br>LYGSDP<br>QEELVY | 2,148.02 |
| ATP | 6018 | vascular<br>endotheli<br>al<br>cadherin<br>precursor                       | gi 3430529<br>9,gi 486753<br>81,gi 75071<br>940   | 87,450.60 | 100.00% | 11 | 16 | 24 | 0.21% | 14.20% | KPLIGSV 2.7<br>LAK              | 1,025.67 |
| ATP | 6018 | vascular<br>endotheli<br>al<br>cadherin<br>precursor                       | gi 3430529<br>9,gi 486753<br>81,gi 75071<br>940   | 87,450.60 | 100.00% | 11 | 16 | 24 | 0.21% | 14.20% | KPLIGSV 4.71<br>LAKDPD<br>AAQR  | 1,779.01 |
| ATP | 6018 | vascular<br>endotheli<br>al<br>cadherin<br>precursor                       | gi 3430529<br>9,gi 486753<br>81,gi 75071<br>940   | 87,450.60 | 100.00% | 11 | 16 | 24 | 0.21% | 14.20% | MLAELY 2.6<br>GSDPQE<br>ELVY    | 1,872.86 |
| ATP | 6018 | vascular<br>endotheli<br>al<br>cadherin<br>precursor                       | gi 3430529<br>9,gi 486753<br>81,gi 75071<br>940   | 87,450.60 | 100.00% | 11 | 16 | 24 | 0.21% | 14.20% | NLESPTS 2.42<br>FTIK            | 1,222.63 |
| ATP | 6018 | vascular<br>endotheli<br>al<br>cadherin<br>precursor                       | gi 3430529<br>9,gi 486753<br>81,gi 75071<br>940   | 87,450.60 | 100.00% | 11 | 16 | 24 | 0.21% | 14.20% | NTGDVY 2.8<br>ALER              | 1,137.55 |
| ATP | 6018 | vascular<br>endotheli<br>al<br>cadherin<br>precursor                       | gi 3430529<br>9,gi 486753<br>81,gi 75071<br>940   | 87,450.60 | 100.00% | 11 | 16 | 24 | 0.21% | 14.20% | PSLYAQ 3.13<br>VQKPPR           | 1,383.77 |
| ATP | 6018 | vascular<br>endotheli<br>al<br>cadherin<br>precursor                       | gi 3430529<br>9,gi 486753<br>81,gi 75071<br>940   | 87,450.60 | 100.00% | 11 | 16 | 24 | 0.21% | 14.20% | TSDKGQ 2.72<br>FFGITK           | 1,328.68 |



|     |      |                                                    |                                                               |           |         |    |    |    |       |        |                                                          |          |
|-----|------|----------------------------------------------------|---------------------------------------------------------------|-----------|---------|----|----|----|-------|--------|----------------------------------------------------------|----------|
| ATP | 6018 | vascular endothelial cadherin precursor            | gi 34305299,gi 48675381,gi 75071940                           | 87,450.60 | 100.00% | 11 | 16 | 24 | 0.21% | 14.20% | VDKNTG 4.01<br>DVYALE R                                  | 1,479.74 |
| ATP | 6018 | vascular endothelial cadherin precursor            | gi 34305299,gi 48675381,gi 75071940                           | 87,450.60 | 100.00% | 11 | 16 | 24 | 0.21% | 14.20% | VGSPPLG 4.69<br>SLFVEDP<br>DEPQNR                        | 2,056.00 |
| ATP | 6018 | vascular endothelial cadherin precursor            | gi 34305299,gi 48675381,gi 75071940                           | 87,450.60 | 100.00% | 11 | 16 | 24 | 0.21% | 14.20% | YSFVQG 2.85<br>EYR                                       | 1,148.54 |
| ATP | 6018 | EH-domain containing 1                             | gi 110331767,gi 158455084,gi 59858079,gi 62751751,gi 75070053 | 60,666.10 | 100.00% | 3  | 3  | 3  | 0.03% | 13.70% | IGPEPTT 3.56<br>DSFIAY<br>MHGPT<br>GVVPGN<br>ALVVDP<br>R | 3,288.66 |
| ATP | 6018 | EH-domain containing 1                             | gi 110331767,gi 158455084,gi 59858079,gi 62751751,gi 75070053 | 60,666.10 | 100.00% | 3  | 3  | 3  | 0.03% | 13.70% | LADVDR 2.8<br>DGLLDD<br>EEFALA<br>NHLIK                  | 2,582.31 |
| ATP | 6018 | EH-domain containing 1                             | gi 110331767,gi 158455084,gi 59858079,gi 62751751,gi 75070053 | 60,666.10 | 100.00% | 3  | 3  | 3  | 0.03% | 13.70% | LFEAEE 4.01<br>QDLFKDI<br>QSLPR                          | 2,178.11 |
| ATP | 6018 | LOC515309 protein                                  | gi 148878460,gi 149773584                                     | 31,548.40 | 99.80%  | 2  | 3  | 3  | 0.03% | 11.00% | KEEEEEEE 4.63<br>EEYDEG<br>SNLKR                         | 2,241.96 |
| ATP | 6018 | LOC515309 protein                                  | gi 148878460,gi 149773584                                     | 31,548.40 | 99.80%  | 2  | 3  | 3  | 0.03% | 11.00% | SNPEDQI 3.8<br>LYQTER                                    | 1,592.76 |
| ATP | 6018 | SCO cytochrome oxidase deficient homolog 1 (yeast) | gi 119223914,gi 122692513,gi 134035032                        | 33,641.50 | 99.80%  | 2  | 3  | 3  | 0.03% | 12.10% | LIGLTGT 3.81<br>KEEIDQ<br>VAR                            | 1,742.97 |
| ATP | 6018 | SCO cytochrome oxidase deficient homolog 1 (yeast) | gi 119223914,gi 122692513,gi 134035032                        | 33,641.50 | 99.80%  | 2  | 3  | 3  | 0.03% | 12.10% | SIGKPLL 4.12<br>GGPFSLT<br>THTGEP<br>K                   | 2,137.17 |
| ATP | 6018 | LMAN1 protein                                      | gi 148744096,gi 149773586                                     | 58,038.50 | 100.00% | 4  | 4  | 5  | 0.04% | 10.40% | GAGAPG 2.78<br>QQGQTF<br>QQELDT<br>VVNTQH<br>EILR        | 3,022.50 |
| ATP | 6018 | LMAN1 protein                                      | gi 148744096,gi 149773586                                     | 58,038.50 | 100.00% | 4  | 4  | 5  | 0.04% | 10.40% | YQEEFE 1.92<br>HFQQEL<br>DK                              | 1,869.83 |
| ATP | 6018 | LMAN1 protein                                      | gi 148744096,gi 149773586                                     | 58,038.50 | 100.00% | 4  | 4  | 5  | 0.04% | 10.40% | YVSSLT 3.39<br>EEISK                                     | 1,255.64 |

|     |      |                                                          |                                                  |           |         |   |   |   |       |        |                                      |      |          |
|-----|------|----------------------------------------------------------|--------------------------------------------------|-----------|---------|---|---|---|-------|--------|--------------------------------------|------|----------|
| ATP | 6018 | LMAN1 protein                                            | gi 148744096,gi 149773586                        | 58,038.50 | 100.00% | 4 | 4 | 5 | 0.04% | 10.40% | YVSSLT<br>EEISKR                     | 2.77 | 1,411.74 |
| ATP | 6018 | acyl-CoA synthetase long-chain family member 5           | gi 115497154,gi 152941112,gi 94534758            | 76,013.10 | 100.00% | 3 | 4 | 4 | 0.03% | 5.86%  | ALVLISN<br>VEK                       | 2.35 | 1,085.66 |
| ATP | 6018 | acyl-CoA synthetase long-chain family member 5           | gi 115497154,gi 152941112,gi 94534758            | 76,013.10 | 100.00% | 3 | 4 | 4 | 0.03% | 5.86%  | GAMLTH<br>ANIVSN<br>ASGFLK           | 3.66 | 1,846.95 |
| ATP | 6018 | acyl-CoA synthetase long-chain family member 5           | gi 115497154,gi 152941112,gi 94534758            | 76,013.10 | 100.00% | 3 | 4 | 4 | 0.03% | 5.86%  | TLKPTLF<br>PTVPR                     | 2.29 | 1,369.82 |
| ATP | 6018 | PREDICTED: similar to ER lipid raft associated isoform 2 | gi 194678978                                     | 39,049.70 | 100.00% | 3 | 3 | 3 | 0.03% | 18.70% | DLNVMA<br>PGLTIQA<br>VR              | 3.48 | 1,613.87 |
| ATP | 6018 | PREDICTED: similar to ER lipid raft associated isoform 2 | gi 194678978                                     | 39,049.70 | 100.00% | 3 | 3 | 3 | 0.03% | 18.70% | EALEPSG<br>ESPIQNK                   | 3.66 | 1,498.74 |
| ATP | 6018 | PREDICTED: similar to ER lipid raft associated isoform 2 | gi 194678978                                     | 39,049.70 | 100.00% | 3 | 3 | 3 | 0.03% | 18.70% | GGALLT<br>SPSGPG<br>YHIMLPF<br>ITTFR | 2.59 | 2,549.32 |
| ATP | 6018 | PREDICTED: similar to ER lipid raft associated isoform 2 | gi 194678978                                     | 39,049.70 | 100.00% | 3 | 3 | 3 | 0.03% | 18.70% | SVQTTL<br>QTDEVK                     | 3.43 | 1,348.70 |
| ATP | 6018 | transporter 2, ATP-binding cassette, sub-family B        | gi 114051053,gi 19171652,gi 27806345,gi 63169160 | 79,287.60 | 100.00% | 3 | 3 | 3 | 0.03% | 10.20% | LQTVQS<br>ADQVLV<br>LR               | 4.01 | 1,569.90 |

|     |      |                                                                                                                                                  |                                                  |           |         |   |   |   |       |        |                                                                          |          |
|-----|------|--------------------------------------------------------------------------------------------------------------------------------------------------|--------------------------------------------------|-----------|---------|---|---|---|-------|--------|--------------------------------------------------------------------------|----------|
| ATP | 6018 | transporter 2, ATP-binding cassette, sub-family B                                                                                                | gi 114051053,gi 19171652,gi 27806345,gi 63169160 | 79,287.60 | 100.00% | 3 | 3 | 3 | 0.03% | 10.20% | QVVLVG 4.67<br>QEPVLFS<br>GSVR                                           | 1,814.02 |
| ATP | 6018 | transporter 2, ATP-binding cassette, sub-family B                                                                                                | gi 114051053,gi 19171652,gi 27806345,gi 63169160 | 79,287.60 | 100.00% | 3 | 3 | 3 | 0.03% | 10.20% | VNFQNV 3.69<br>SFA YPSR<br>PDQPAL<br>QGLTFT<br>LSPGQM<br>TALVGP<br>NGSGK | 4,408.20 |
| ATP | 6018 | PREDICTED: similar to Heterogeneous nuclear ribonucleoprotein G (hnRNP G) (RNA-binding motif protein, X chromosome) (Glycoprotein p43) isoform 5 | gi 119919689                                     | 42,296.60 | 100.00% | 3 | 3 | 3 | 0.03% | 11.00% | AIKVEQ 2.88<br>ATKPSFE<br>SGR                                            | 1,747.93 |
| ATP | 6018 | PREDICTED: similar to Heterogeneous nuclear ribonucleoprotein G (hnRNP G) (RNA-binding motif protein, X chromosome) (Glycoprotein p43) isoform 5 | gi 119919689                                     | 42,296.60 | 100.00% | 3 | 3 | 3 | 0.03% | 11.00% | GFAFVT 2.91<br>FESPAD<br>AK                                              | 1,486.72 |

|     |      |                                                                                                                                                                                             |                                                    |           |         |   |    |    |       |        |                                 |      |          |
|-----|------|---------------------------------------------------------------------------------------------------------------------------------------------------------------------------------------------|----------------------------------------------------|-----------|---------|---|----|----|-------|--------|---------------------------------|------|----------|
| ATP | 6018 | PREDICTED:<br>similar to<br>Heterogeneous<br>nuclear<br>ribonucleoprotein<br>G (hnRNP<br>G) (RNA-<br>binding<br>motif<br>protein,<br>X<br>chromosome)<br>(Glycoprotein<br>p43)<br>isoform 5 | gi 119919689                                       | 42,296.60 | 100.00% | 3 | 3  | 3  | 0.03% | 11.00% | LFIGGLN<br>TETNEK               | 3.59 | 1,435.74 |
| ATP | 6018 | Solute carrier<br>family 39<br>(zinc<br>transporter),<br>member<br>7                                                                                                                        | gi 112362085,gi 115749633,gi 146231764,gi 63169171 | 42,835.10 | 99.80%  | 2 | 2  | 2  | 0.02% | 8.77%  | DGPVRR<br>QNAEEE<br>KAGSDL<br>R | 3.23 | 2,068.01 |
| ATP | 6018 | Solute carrier<br>family 39<br>(zinc<br>transporter),<br>member<br>7                                                                                                                        | gi 112362085,gi 115749633,gi 146231764,gi 63169171 | 42,835.10 | 99.80%  | 2 | 2  | 2  | 0.02% | 8.77%  | EKQSSE<br>EEEKEA<br>GALR        | 2.72 | 1,819.87 |
| ATP | 6018 | RecName :<br>Full=Malate<br>dehydrogenase,<br>mitochondrial;<br>Flags:<br>Precursor                                                                                                         | gi 118572778,gi 81674781                           | 35,651.00 | 100.00% | 7 | 10 | 13 | 0.11% | 35.50% | AGAGSA<br>TLSMAY<br>AGAR        | 3.93 | 1,470.70 |
| ATP | 6018 | RecName :<br>Full=Malate<br>dehydrogenase,<br>mitochondrial;<br>Flags:<br>Precursor                                                                                                         | gi 118572778,gi 81674781                           | 35,651.00 | 100.00% | 7 | 10 | 13 | 0.11% | 35.50% | ANAFVA<br>ELKDLD<br>PAR         | 2.78 | 1,629.86 |

|     |      |                                                                                                                                           |           |         |   |    |    |       |        |                                           |      |          |
|-----|------|-------------------------------------------------------------------------------------------------------------------------------------------|-----------|---------|---|----|----|-------|--------|-------------------------------------------|------|----------|
| ATP | 6018 | RecName gi 1185727 :<br>78,gi 81674<br>Full=Mal 781<br>ate<br>dehydrog<br>enase,<br>mitochon<br>drial;<br>Flags:<br>Precursor             | 35,651.00 | 100.00% | 7 | 10 | 13 | 0.11% | 35.50% | GYLGP<br>QLPDCL<br>KGCDVV<br>VIPAGVP<br>R | 3.75 | 2,695.40 |
| ATP | 6018 | RecName gi 1185727 :<br>78,gi 81674<br>Full=Mal 781<br>ate<br>dehydrog<br>enase,<br>mitochon<br>drial;<br>Flags:<br>Precursor             | 35,651.00 | 100.00% | 7 | 10 | 13 | 0.11% | 35.50% | LTLYDIA<br>HTPGVA<br>ADLSHIE<br>TR        | 5.5  | 2,393.25 |
| ATP | 6018 | RecName gi 1185727 :<br>78,gi 81674<br>Full=Mal 781<br>ate<br>dehydrog<br>enase,<br>mitochon<br>drial;<br>Flags:<br>Precursor             | 35,651.00 | 100.00% | 7 | 10 | 13 | 0.11% | 35.50% | MIAEAIP<br>ELK                            | 3.02 | 1,130.61 |
| ATP | 6018 | RecName gi 1185727 :<br>78,gi 81674<br>Full=Mal 781<br>ate<br>dehydrog<br>enase,<br>mitochon<br>drial;<br>Flags:<br>Precursor             | 35,651.00 | 100.00% | 7 | 10 | 13 | 0.11% | 35.50% | VAVLGA<br>SGGIGQP<br>LSLLLK               | 7.17 | 1,793.09 |
| ATP | 6018 | RecName gi 1185727 :<br>78,gi 81674<br>Full=Mal 781<br>ate<br>dehydrog<br>enase,<br>mitochon<br>drial;<br>Flags:<br>Precursor             | 35,651.00 | 100.00% | 7 | 10 | 13 | 0.11% | 35.50% | VNVPVI<br>GGHAGK                          | 3.25 | 1,147.66 |
| ATP | 6018 | Chain A, gi 1105910 :<br>Subcomp 26,gi 11059<br>lex Of 1029,gi 602<br>The 033<br>Stator Of<br>Bovine<br>Mitochon<br>drial Atp<br>Synthase | 24,651.00 | 100.00% | 4 | 4  | 16 | 0.14% | 21.50% | FGLIPEE<br>FFQFLYP<br>K                   | 2.91 | 1,874.97 |

|     |      |                                                                                            |                                                                                                  |           |         |    |    |    |       |        |                                        |          |
|-----|------|--------------------------------------------------------------------------------------------|--------------------------------------------------------------------------------------------------|-----------|---------|----|----|----|-------|--------|----------------------------------------|----------|
| ATP | 6018 | Chain A, Subcomp<br>lex Of The<br>Stator Of<br>Bovine<br>Mitochon<br>drial Atp<br>Synthase | gi 1105910<br>26,gi 11059<br>1029,gi 602<br>033                                                  | 24,651.00 | 100.00% | 4  | 4  | 16 | 0.14% | 21.50% | HYLFDV 2.72<br>QR                      | 1,077.55 |
| ATP | 6018 | Chain A, Subcomp<br>lex Of The<br>Stator Of<br>Bovine<br>Mitochon<br>drial Atp<br>Synthase | gi 1105910<br>26,gi 11059<br>1029,gi 602<br>033                                                  | 24,651.00 | 100.00% | 4  | 4  | 16 | 0.14% | 21.50% | NNIAMA 3.76<br>LEVTYR                  | 1,410.70 |
| ATP | 6018 | Chain A, Subcomp<br>lex Of The<br>Stator Of<br>Bovine<br>Mitochon<br>drial Atp<br>Synthase | gi 1105910<br>26,gi 11059<br>1029,gi 602<br>033                                                  | 24,651.00 | 100.00% | 4  | 4  | 16 | 0.14% | 21.50% | PVPPLPE 1.7<br>HGGK                    | 1,127.62 |
| ATP | 6018 | Ribosomal protein<br>S8                                                                    | gi 1192241<br>10,gi 58760<br>384,gi 5985<br>8489,gi 707<br>78956,gi 74<br>268417,gi 7<br>5070020 | 24,188.40 | 99.80%  | 2  | 2  | 3  | 0.03% | 13.50% | IIDVVYN 3.52<br>ASNNEL<br>VR           | 1,718.91 |
| ATP | 6018 | Ribosomal protein<br>S8                                                                    | gi 1192241<br>10,gi 58760<br>384,gi 5985<br>8489,gi 707<br>78956,gi 74<br>268417,gi 7<br>5070020 | 24,188.40 | 99.80%  | 2  | 2  | 3  | 0.03% | 13.50% | ISSLLEE 4.14<br>QFQQGK                 | 1,506.78 |
| ATP | 6018 | PREDICTED:<br>similar to<br>oxysterol<br>7alpha-<br>hydroxylase                            | gi 1946727<br>64                                                                                 | 90,479.20 | 99.80%  | 2  | 3  | 3  | 0.03% | 4.96%  | AMAVLR 4.07<br>DEIDHLL<br>QSTGQK       | 2,141.10 |
| ATP | 6018 | PREDICTED:<br>similar to<br>oxysterol<br>7alpha-<br>hydroxylase                            | gi 1946727<br>64                                                                                 | 90,479.20 | 99.80%  | 2  | 3  | 3  | 0.03% | 4.96%  | MLTDSD 3.45<br>LIDEIHS<br>TYQFLQ<br>GK | 2,470.18 |
| ATP | 6018 | TUBA1B protein                                                                             | gi 1488780<br>19,gi 16880<br>4008                                                                | 50,133.70 | 100.00% | 10 | 15 | 23 | 0.20% | 33.70% | AVFVDL 5.31<br>EPTVIDE<br>VR           | 1,701.91 |
| ATP | 6018 | TUBA1B protein                                                                             | gi 1488780<br>19,gi 16880<br>4008                                                                | 50,133.70 | 100.00% | 10 | 15 | 23 | 0.20% | 33.70% | DVNAAI 3.38<br>ATIK                    | 1,015.58 |
| ATP | 6018 | TUBA1B protein                                                                             | gi 1488780<br>19,gi 16880<br>4008                                                                | 50,133.70 | 100.00% | 10 | 15 | 23 | 0.20% | 33.70% | EIIDLVL 2.44<br>DR                     | 1,085.62 |

|     |      |                                                                    |                                      |           |         |    |    |    |       |        |                                              |          |
|-----|------|--------------------------------------------------------------------|--------------------------------------|-----------|---------|----|----|----|-------|--------|----------------------------------------------|----------|
| ATP | 6018 | TUBA1B protein                                                     | gi 148878019,gi 168804008            | 50,133.70 | 100.00% | 10 | 15 | 23 | 0.20% | 33.70% | FDGALN 4.74<br>VDLTEF<br>QTNLVP<br>YPR       | 2,409.21 |
| ATP | 6018 | TUBA1B protein                                                     | gi 148878019,gi 168804008            | 50,133.70 | 100.00% | 10 | 15 | 23 | 0.20% | 33.70% | IHFPLAT 3.15<br>YAPVISA<br>EK                | 1,756.96 |
| ATP | 6018 | TUBA1B protein                                                     | gi 148878019,gi 168804008            | 50,133.70 | 100.00% | 10 | 15 | 23 | 0.20% | 33.70% | LDHKFD 2.87<br>LMYAK                         | 1,396.69 |
| ATP | 6018 | TUBA1B protein                                                     | gi 148878019,gi 168804008            | 50,133.70 | 100.00% | 10 | 15 | 23 | 0.20% | 33.70% | LISQIVSS 4.7<br>ITASLR                       | 1,487.88 |
| ATP | 6018 | TUBA1B protein                                                     | gi 148878019,gi 168804008            | 50,133.70 | 100.00% | 10 | 15 | 23 | 0.20% | 33.70% | QLFHPE 3.44<br>QLITGKE<br>DAANNY<br>AR       | 2,415.21 |
| ATP | 6018 | TUBA1B protein                                                     | gi 148878019,gi 168804008            | 50,133.70 | 100.00% | 10 | 15 | 23 | 0.20% | 33.70% | RNLDIR 3.26<br>PTYTNL<br>NR                  | 1,874.98 |
| ATP | 6018 | TUBA1B protein                                                     | gi 148878019,gi 168804008            | 50,133.70 | 100.00% | 10 | 15 | 23 | 0.20% | 33.70% | TIGGGD 3.75<br>DSFNTEF<br>SETGAG<br>K        | 2,007.89 |
| ATP | 6018 | PREDICTED: similar to transmembrane protein 165                    | gi 76619924                          | 34,667.10 | 99.80%  | 2  | 3  | 4  | 0.03% | 13.30% | MSPDEG 3.61<br>QEELEE<br>VQAEK               | 2,076.93 |
| ATP | 6018 | PREDICTED: similar to transmembrane protein 165                    | gi 76619924                          | 34,667.10 | 99.80%  | 2  | 3  | 4  | 0.03% | 13.30% | NKEPPA 5.4<br>PAQLQ<br>PQPAAV<br>QGPEPA<br>R | 2,619.36 |
| ATP | 6018 | PREDICTED: proteasome (prosome), macropain) 26S subunit, ATPase, 3 | gi 119907799,gi 74268141,gi 95769198 | 49,300.20 | 100.00% | 3  | 3  | 3  | 0.03% | 12.70% | AMEVDE 4.4<br>RPTEQY<br>SDIGGLD<br>K         | 2,269.03 |
| ATP | 6018 | PREDICTED: proteasome (prosome), macropain) 26S subunit, ATPase, 3 | gi 119907799,gi 74268141,gi 95769198 | 49,300.20 | 100.00% | 3  | 3  | 3  | 0.03% | 12.70% | TMLELL 2.89<br>NQLDGF<br>QPNTQV<br>K         | 2,205.12 |

|     |      |                                                                                                                                                                  |                                                     |            |         |   |   |   |       |        |                                      |      |          |
|-----|------|------------------------------------------------------------------------------------------------------------------------------------------------------------------|-----------------------------------------------------|------------|---------|---|---|---|-------|--------|--------------------------------------|------|----------|
| ATP | 6018 | PREDICTED: proteasome (prosome, macropain) 26S subunit, ATPase, 3                                                                                                | gi 119907799,gi 74268141,gi 95769198                | 49,300.20  | 100.00% | 3 | 3 | 3 | 0.03% | 12.70% | VIAATN RVDILDP ALLR                  | 3.75 | 1,850.09 |
| ATP | 6018 | Adaptor-related protein complex 2, beta 1 subunit                                                                                                                | gi 115304848,gi 115497346,gi 122132354,gi 124028640 | 104,551.20 | 99.80%  | 2 | 2 | 2 | 0.02% | 4.80%  | IDNADEL LESFLEG FHDEST QVQLTL LTAIVK | 3.18 | 3,588.83 |
| ATP | 6018 | Adaptor-related protein complex 2, beta 1 subunit                                                                                                                | gi 115304848,gi 115497346,gi 122132354,gi 124028640 | 104,551.20 | 99.80%  | 2 | 2 | 2 | 0.02% | 4.80%  | NVEGQD MLYQSL K                      | 3.36 | 1,540.73 |
| ATP | 6018 | RecName: Full=NA DH dehydrogenase [ubiquinone] 1 alpha subcomplex 8; AltName: Full=NA DH-ubiquinone oxidoreductase 19 kDa subunit; AltName: Full=Complex I-19kD; | gi 1171870,gi 28461275,gi 599681,gi 86827664        | 20,073.10  | 99.80%  | 2 | 3 | 3 | 0.03% | 18.60% | ARPEPN PEVEGD LKPAR                  | 5.81 | 1,874.97 |



|     |      |                                                                                                                                                                                                                                                                                                              |                       |    |    |    |       |        |                              |          |
|-----|------|--------------------------------------------------------------------------------------------------------------------------------------------------------------------------------------------------------------------------------------------------------------------------------------------------------------|-----------------------|----|----|----|-------|--------|------------------------------|----------|
| ATP | 6018 | RecName gi 1171870, 20,073.10<br>:<br>Full=NA 5,gi 599681<br>DH .gi 8682766<br>dehydrog 4<br>enase<br>[ubiquino<br>ne] 1<br>alpha<br>subcompl<br>ex<br>subunit<br>8;<br>AltName:<br>Full=NA<br>DH-<br>ubiquino<br>ne<br>oxidored<br>uctase 19<br>kDa<br>subunit;<br>AltName:<br>Full=Co<br>mplex I-<br>19kD; | 99.80%                | 2  | 3  | 3  | 0.03% | 18.60% | VKTDRP 2.74<br>LPENPY<br>HSR | 1,808.94 |
| ATP | 6018 | RecName gi 266647<br>:<br>Full=Nitr<br>ic oxide<br>synthase,<br>endotheli<br>al;<br>AltName:<br>Full=End<br>othelial<br>NOS;<br>Short=eN<br>OS;<br>AltName:<br>Full=EC-<br>NOS;<br>AltName:<br>Full=NO<br>S type III;<br>Short=N<br>OSIII;<br>AltName:<br>Full=Con<br>stitutive<br>NOS;<br>Short=cN          | 133,270.00<br>100.00% | 15 | 20 | 30 | 0.26% | 16.10% | AAAQDI 2.82<br>FSPK          | 1,047.55 |













|     |      |                                                                                                                                                                                                                                                  |                                  |           |        |    |    |       |        |                         |                            |          |
|-----|------|--------------------------------------------------------------------------------------------------------------------------------------------------------------------------------------------------------------------------------------------------|----------------------------------|-----------|--------|----|----|-------|--------|-------------------------|----------------------------|----------|
| ATP | 6018 | RecName gi 266647                                                                                                                                                                                                                                | 133,270.00                       | 100.00%   | 15     | 20 | 30 | 0.26% | 16.10% | VLTAFS 2<br>REPDSP<br>K | 1,446.76                   |          |
|     |      | :<br>Full=Nitric<br>oxide synthase,<br>endothelial;<br>AltName:<br>Full=Endothelial<br>NOS;<br>Short=eNOS;<br>AltName:<br>Full=EC-NOS;<br>AltName:<br>Full=NO S type III;<br>Short=NO SIII;<br>AltName:<br>Full=Constitutive<br>NOS;<br>Short=cN |                                  |           |        |    |    |       |        |                         |                            |          |
| ATP | 6018 | RecName gi 266647                                                                                                                                                                                                                                | 133,270.00                       | 100.00%   | 15     | 20 | 30 | 0.26% | 16.10% | YHEDIFG 3.19<br>LTLR    | 1,363.70                   |          |
|     |      | :<br>Full=Nitric<br>oxide synthase,<br>endothelial;<br>AltName:<br>Full=Endothelial<br>NOS;<br>Short=eNOS;<br>AltName:<br>Full=EC-NOS;<br>AltName:<br>Full=NO S type III;<br>Short=NO SIII;<br>AltName:<br>Full=Constitutive<br>NOS;<br>Short=cN |                                  |           |        |    |    |       |        |                         |                            |          |
| ATP | 6018 | solute carrier<br>family 7<br>(cationic amino<br>acid transporter,<br>y+ system),<br>member 1                                                                                                                                                    | gi 2094470<br>36,gi 88954<br>020 | 67,875.80 | 99.80% | 2  | 2  | 2     | 0.02%  | 4.29%                   | VIYAMA 3.61<br>EDGLLF<br>K | 1,485.77 |



|     |      |                                                                                    |                                                   |           |         |   |   |    |       |        |                                                        |      |          |
|-----|------|------------------------------------------------------------------------------------|---------------------------------------------------|-----------|---------|---|---|----|-------|--------|--------------------------------------------------------|------|----------|
| ATP | 6018 | solute carrier family 7 (cationic amino acid transporter, y+ system), member 1     | gi 209447036,gi 88954020                          | 67,875.80 | 99.80%  | 2 | 2 | 2  | 0.02% | 4.29%  | YQPEQP<br>NTVYQ<br>MAR                                 | 3.18 | 1,740.80 |
| ATP | 6018 | PREDICTED: similar to eukaryotic translation elongation factor 1 alpha 1 isoform 1 | gi 119938328,gi 148745492,gi 68299807,gi 86827651 | 50,141.20 | 100.00% | 6 | 9 | 13 | 0.11% | 15.20% | IGGIGTV<br>PVGR                                        | 3.32 | 1,025.61 |
| ATP | 6018 | PREDICTED: similar to eukaryotic translation elongation factor 1 alpha 1 isoform 1 | gi 119938328,gi 148745492,gi 68299807,gi 86827651 | 50,141.20 | 100.00% | 6 | 9 | 13 | 0.11% | 15.20% | IGGIGTV<br>PVGRVE<br>TGVLPK<br>GMVVTF<br>APVNV<br>TEVK | 2.78 | 3,537.97 |
| ATP | 6018 | PREDICTED: similar to eukaryotic translation elongation factor 1 alpha 1 isoform 1 | gi 119938328,gi 148745492,gi 68299807,gi 86827651 | 50,141.20 | 100.00% | 6 | 9 | 13 | 0.11% | 15.20% | LPLQDV<br>YK                                           | 2.52 | 975.5511 |
| ATP | 6018 | PREDICTED: similar to eukaryotic translation elongation factor 1 alpha 1 isoform 1 | gi 119938328,gi 148745492,gi 68299807,gi 86827651 | 50,141.20 | 100.00% | 6 | 9 | 13 | 0.11% | 15.20% | THINIVV<br>IGHVDS<br>GK                                | 2.84 | 1,588.88 |
| ATP | 6018 | PREDICTED: similar to eukaryotic translation elongation factor 1 alpha 1 isoform 1 | gi 119938328,gi 148745492,gi 68299807,gi 86827651 | 50,141.20 | 100.00% | 6 | 9 | 13 | 0.11% | 15.20% | VETGVL<br>KPGMVV<br>TFAPVN<br>VTTEVK                   | 5.02 | 2,531.38 |

|     |      |                                                                                     |                                                   |           |         |   |   |    |       |        |                                           |          |
|-----|------|-------------------------------------------------------------------------------------|---------------------------------------------------|-----------|---------|---|---|----|-------|--------|-------------------------------------------|----------|
| ATP | 6018 | PREDIC TED: similar to eukaryotic translation elongation factor 1 alpha 1 isoform 1 | gi 119938328,gi 148745492,gi 68299807,gi 86827651 | 50,141.20 | 100.00% | 6 | 9 | 13 | 0.11% | 15.20% | YYVTHID 3.56<br>APGHR                     | 1,404.73 |
| ATP | 6018 | cell division cycle 42 (GTP binding protein, 25kDa)                                 | gi 114052486,gi 122063301,gi 86821687             | 21,240.70 | 99.90%  | 2 | 3 | 9  | 0.08% | 19.90% | NVFDEAI 4.85<br>LAALEPP<br>EPK            | 1,852.97 |
| ATP | 6018 | cell division cycle 42 (GTP binding protein, 25kDa)                                 | gi 114052486,gi 122063301,gi 86821687             | 21,240.70 | 99.90%  | 2 | 3 | 9  | 0.08% | 19.90% | TPFLLVG 4.23<br>TQIDLRD<br>DPSTIEK        | 2,358.26 |
| ATP | 6018 | RecName : Full=Golgi SNAP receptor complex member 1                                 | gi 108935998,gi 83638559,gi 84370083              | 28,524.90 | 100.00% | 3 | 3 | 3  | 0.03% | 12.00% | FPAVNS 3.42<br>LIQR                       | 1,144.65 |
| ATP | 6018 | RecName : Full=Golgi SNAP receptor complex member 1                                 | gi 108935998,gi 83638559,gi 84370083              | 28,524.90 | 100.00% | 3 | 3 | 3  | 0.03% | 12.00% | LIEETISI 3.09<br>AMATK                    | 1,435.77 |
| ATP | 6018 | RecName : Full=Golgi SNAP receptor complex member 1                                 | gi 108935998,gi 83638559,gi 84370083              | 28,524.90 | 100.00% | 3 | 3 | 3  | 0.03% | 12.00% | MNTLAN 3.46<br>RFPAVN<br>SLIQR            | 1,961.04 |
| ATP | 6018 | minor histocompatibility antigen 13                                                 | gi 164448616                                      | 41,537.10 | 100.00% | 3 | 3 | 6  | 0.05% | 15.60% | GEVTEM 3.13<br>FSYEESN<br>PKDPAA<br>VTETR | 2,703.21 |
| ATP | 6018 | minor histocompatibility antigen 13                                                 | gi 164448616                                      | 41,537.10 | 100.00% | 3 | 3 | 6  | 0.05% | 15.60% | LVFPQD 2.2<br>LLEK                        | 1,201.68 |
| ATP | 6018 | minor histocompatibility antigen 13                                                 | gi 164448616                                      | 41,537.10 | 100.00% | 3 | 3 | 6  | 0.05% | 15.60% | QYQLLF 4.26<br>TQGSGE<br>NKEEIN<br>YEFDTK | 2,994.44 |
| ATP | 6018 | transcription factor EF1(A)                                                         | gi 162983,gi 27807361,gi 54040030,gi 86821283     | 35,905.70 | 100.00% | 8 | 9 | 12 | 0.10% | 43.20% | AADPPA 2.82<br>ENSSAPE<br>AEQGGAE         | 1,897.80 |

|     |      |                                                                                         |                                                               |           |         |   |   |    |       |        |                                                |      |          |
|-----|------|-----------------------------------------------------------------------------------------|---------------------------------------------------------------|-----------|---------|---|---|----|-------|--------|------------------------------------------------|------|----------|
| ATP | 6018 | transcript<br>ion factor<br>EF1(A)                                                      | gi 162983.g<br>i 27807361,<br>gi 5404003<br>0,gi 868212<br>83 | 35,905.70 | 100.00% | 8 | 9 | 12 | 0.10% | 43.20% | EDGNEE<br>DKENQG<br>DETQGG<br>QPPQR            | 3.54 | 2,628.10 |
| ATP | 6018 | transcript<br>ion factor<br>EF1(A)                                                      | gi 162983.g<br>i 27807361,<br>gi 5404003<br>0,gi 868212<br>83 | 35,905.70 | 100.00% | 8 | 9 | 12 | 0.10% | 43.20% | EDGNEE<br>DKENQG<br>DETQGG<br>QPPQR            | 2.22 | 2,784.21 |
| ATP | 6018 | transcript<br>ion factor<br>EF1(A)                                                      | gi 162983.g<br>i 27807361,<br>gi 5404003<br>0,gi 868212<br>83 | 35,905.70 | 100.00% | 8 | 9 | 12 | 0.10% | 43.20% | GAEAAAN<br>VTGPGG<br>VPVQGS<br>K               | 4.75 | 1,695.87 |
| ATP | 6018 | transcript<br>ion factor<br>EF1(A)                                                      | gi 162983.g<br>i 27807361,<br>gi 5404003<br>0,gi 868212<br>83 | 35,905.70 | 100.00% | 8 | 9 | 12 | 0.10% | 43.20% | NDTKED<br>VFBHQT<br>AIK                        | 3    | 1,744.89 |
| ATP | 6018 | transcript<br>ion factor<br>EF1(A)                                                      | gi 162983.g<br>i 27807361,<br>gi 5404003<br>0,gi 868212<br>83 | 35,905.70 | 100.00% | 8 | 9 | 12 | 0.10% | 43.20% | NYQQNY<br>QNSESG<br>EKNEGS<br>ESAPEG<br>QAQQR  | 6.32 | 3,257.40 |
| ATP | 6018 | transcript<br>ion factor<br>EF1(A)                                                      | gi 162983.g<br>i 27807361,<br>gi 5404003<br>0,gi 868212<br>83 | 35,905.70 | 100.00% | 8 | 9 | 12 | 0.10% | 43.20% | QPREDG<br>NEEDKE<br>NQGDET<br>QGQPP<br>QR      | 2.94 | 3,009.32 |
| ATP | 6018 | transcript<br>ion factor<br>EF1(A)                                                      | gi 162983.g<br>i 27807361,<br>gi 5404003<br>0,gi 868212<br>83 | 35,905.70 | 100.00% | 8 | 9 | 12 | 0.10% | 43.20% | RPQYSN<br>PPVQGE<br>VMEGAD<br>NQGAGE<br>QGRPVR | 4.74 | 3,239.53 |
| ATP | 6018 | PREDIC<br>TED:<br>similar to<br>vesicle<br>amine<br>transport<br>protein 1<br>isoform 1 | gi 7667127<br>8                                               | 42,822.00 | 100.00% | 3 | 3 | 3  | 0.03% | 12.20% | GVDIVM<br>DPLGGS<br>DTAK                       | 4.63 | 1,590.77 |
| ATP | 6018 | PREDIC<br>TED:<br>similar to<br>vesicle<br>amine<br>transport<br>protein 1<br>isoform 1 | gi 7667127<br>8                                               | 42,822.00 | 100.00% | 3 | 3 | 3  | 0.03% | 12.20% | LQTRPA<br>APPAPG<br>TGQLTL<br>R                | 2.71 | 1,945.10 |
| ATP | 6018 | PREDIC<br>TED:<br>similar to<br>vesicle<br>amine<br>transport<br>protein 1<br>isoform 1 | gi 7667127<br>8                                               | 42,822.00 | 100.00% | 3 | 3 | 3  | 0.03% | 12.20% | VVTYG<br>MANLLT<br>GPK                         | 3.2  | 1,479.79 |

|     |      |                                                                                                                                                             |                                                                   |           |         |   |   |   |       |        |                         |      |          |
|-----|------|-------------------------------------------------------------------------------------------------------------------------------------------------------------|-------------------------------------------------------------------|-----------|---------|---|---|---|-------|--------|-------------------------|------|----------|
| ATP | 6018 | RecName<br>:<br>Full=Ade<br>nosylhom<br>ocysteina<br>se;<br>Short=Ad<br>oHcyase;<br>AltName:<br>Full=S-<br>adenosyl-<br>L-<br>homocyst<br>eine<br>hydrolase | gi 1185738<br>56,gi 14623<br>1804,gi 757<br>73598,gi 77<br>735583 | 47,620.90 | 100.00% | 4 | 4 | 5 | 0.04% | 11.30% | GISEETT<br>TGVHNL<br>YK | 3.66 | 1,648.82 |
| ATP | 6018 | RecName<br>:<br>Full=Ade<br>nosylhom<br>ocysteina<br>se;<br>Short=Ad<br>oHcyase;<br>AltName:<br>Full=S-<br>adenosyl-<br>L-<br>homocyst<br>eine<br>hydrolase | gi 1185738<br>56,gi 14623<br>1804,gi 757<br>73598,gi 77<br>735583 | 47,620.90 | 100.00% | 4 | 4 | 5 | 0.04% | 11.30% | KLDEAV<br>AEAHLG<br>K   | 4.76 | 1,380.75 |
| ATP | 6018 | RecName<br>:<br>Full=Ade<br>nosylhom<br>ocysteina<br>se;<br>Short=Ad<br>oHcyase;<br>AltName:<br>Full=S-<br>adenosyl-<br>L-<br>homocyst<br>eine<br>hydrolase | gi 1185738<br>56,gi 14623<br>1804,gi 757<br>73598,gi 77<br>735583 | 47,620.90 | 100.00% | 4 | 4 | 5 | 0.04% | 11.30% | VPAINV<br>NDSVTK        | 3.25 | 1,256.68 |
| ATP | 6018 | RecName<br>:<br>Full=Ade<br>nosylhom<br>ocysteina<br>se;<br>Short=Ad<br>oHcyase;<br>AltName:<br>Full=S-<br>adenosyl-<br>L-<br>homocyst<br>eine<br>hydrolase | gi 1185738<br>56,gi 14623<br>1804,gi 757<br>73598,gi 77<br>735583 | 47,620.90 | 100.00% | 4 | 4 | 5 | 0.04% | 11.30% | YPQLLS<br>GIR           | 3.12 | 1,046.60 |

|     |      |                                                                                                                                                                                         |                                     |           |         |   |   |    |       |        |                                                      |      |          |
|-----|------|-----------------------------------------------------------------------------------------------------------------------------------------------------------------------------------------|-------------------------------------|-----------|---------|---|---|----|-------|--------|------------------------------------------------------|------|----------|
| ATP | 6018 | PREDICTED:<br>similar to<br>Feline<br>leukemia<br>virus<br>subgroup<br>C<br>receptor-<br>related<br>protein 1<br>(Feline<br>leukemia<br>virus<br>subgroup<br>C<br>receptor)<br>(hFLVCR) | gi 194674242                        | 59,731.10 | 99.80%  | 2 | 2 | 2  | 0.02% | 3.60%  | DPGEET<br>PGGEGT<br>LVPR                             | 3.83 | 1,610.77 |
| ATP | 6018 | PREDICTED:<br>similar to<br>Feline<br>leukemia<br>virus<br>subgroup<br>C<br>receptor-<br>related<br>protein 1<br>(Feline<br>leukemia<br>virus<br>subgroup<br>C<br>receptor)<br>(hFLVCR) | gi 194674242                        | 59,731.10 | 99.80%  | 2 | 2 | 2  | 0.02% | 3.60%  | LLPKDP<br>GEETPG<br>GEGTLV<br>PR                     | 2.93 | 2,062.08 |
| ATP | 6018 | l-caldesmon                                                                                                                                                                             | gi 242512179,gi 27806279            | 62,068.20 | 99.80%  | 2 | 2 | 2  | 0.02% | 5.79%  | LEQYTS<br>AIEGTK                                     | 2.94 | 1,339.67 |
| ATP | 6018 | l-caldesmon                                                                                                                                                                             | gi 242512179,gi 27806279            | 62,068.20 | 99.80%  | 2 | 2 | 2  | 0.02% | 5.79%  | TTTTNT<br>QAEGDD<br>EAALLER                          | 4.3  | 2,035.94 |
| ATP | 6018 | H3 histone, family 3A                                                                                                                                                                   | gi 59858289,gi 62177168,gi 95769331 | 15,310.70 | 100.00% | 3 | 5 | 11 | 0.09% | 38.20% | EIAQDFK<br>TDLR                                      | 2.85 | 1,335.69 |
| ATP | 6018 | H3 histone, family 3A                                                                                                                                                                   | gi 59858289,gi 62177168,gi 95769331 | 15,310.70 | 100.00% | 3 | 5 | 11 | 0.09% | 38.20% | FQSAAIG<br>ALQEAS<br>EAYLVG<br>LFEDTN<br>LCAIHA<br>K | 4.63 | 3,380.68 |
| ATP | 6018 | H3 histone, family 3A                                                                                                                                                                   | gi 59858289,gi 62177168,gi 95769331 | 15,310.70 | 100.00% | 3 | 5 | 11 | 0.09% | 38.20% | YRPGTV<br>ALR                                        | 2.56 | 1,032.59 |
| ATP | 6018 | PREDICTED:<br>eukaryotic<br>translation<br>initiation<br>factor 3,<br>subunit A<br>isoform 4                                                                                            | gi 119924055,gi 154757413           | 98,873.80 | 99.80%  | 2 | 2 | 2  | 0.02% | 4.59%  | EQPEKE<br>PELQQY<br>VPQLQN<br>NTILR                  | 3.09 | 2,794.44 |

|     |      |                                                                                                              |                                                               |           |         |   |   |   |       |        |                    |      |          |
|-----|------|--------------------------------------------------------------------------------------------------------------|---------------------------------------------------------------|-----------|---------|---|---|---|-------|--------|--------------------|------|----------|
| ATP | 6018 | PREDIC TED: eukaryotic translation initiation factor 3, subunit A isoform 4                                  | gi 119924055,gi 154757413                                     | 98,873.80 | 99.80%  | 2 | 2 | 2 | 0.02% | 4.59%  | LTSLVPFVDAFQLER    | 3.44 | 1,734.94 |
| ATP | 6018 | dihydroorotate dehydrogenase precursor                                                                       | gi 110665638,gi 112362407,gi 59857979,gi 62751827,gi 75057853 | 42,758.80 | 100.00% | 3 | 3 | 3 | 0.03% | 10.40% | FTSLGLLPR          | 2.52 | 1,003.59 |
| ATP | 6018 | dihydroorotate dehydrogenase precursor                                                                       | gi 110665638,gi 112362407,gi 59857979,gi 62751827,gi 75057853 | 42,758.80 | 100.00% | 3 | 3 | 3 | 0.03% | 10.40% | LTEDGLPLGINLGK     | 4.21 | 1,439.81 |
| ATP | 6018 | dihydroorotate dehydrogenase precursor                                                                       | gi 110665638,gi 112362407,gi 59857979,gi 62751827,gi 75057853 | 42,758.80 | 100.00% | 3 | 3 | 3 | 0.03% | 10.40% | VPIVGVGGVSSGQDALEK | 5.18 | 1,711.92 |
| ATP | 6018 | inositol monophosphatase domain containing 1                                                                 | gi 114052460,gi 122136157,gi 86827736                         | 38,905.90 | 99.80%  | 2 | 2 | 2 | 0.02% | 8.84%  | TREGADDKMTSGDVLSNR | 3.03 | 1,967.91 |
| ATP | 6018 | inositol monophosphatase domain containing 1                                                                 | gi 114052460,gi 122136157,gi 86827736                         | 38,905.90 | 99.80%  | 2 | 2 | 2 | 0.02% | 8.84%  | VLALLDVPDKSQEK     | 2.88 | 1,554.87 |
| ATP | 6018 | PREDIC TED: eukaryotic translation elongation factor 1 delta (guanine nucleotide exchange protein) isoform 1 | gi 119906216,gi 146231746,gi 172047287                        | 32,883.70 | 99.80%  | 2 | 2 | 2 | 0.02% | 8.03%  | GVVQDLQAVSK        | 2.65 | 1,271.70 |

|     |      |                                                                                                              |                                        |            |         |   |   |   |       |       |                        |      |          |
|-----|------|--------------------------------------------------------------------------------------------------------------|----------------------------------------|------------|---------|---|---|---|-------|-------|------------------------|------|----------|
| ATP | 6018 | PREDIC TED: eukaryotic translation elongation factor 1 delta (guanine nucleotide exchange protein) isoform 1 | gi 119906216,gi 146231746,gi 172047287 | 32,883.70  | 99.80%  | 2 | 2 | 2 | 0.02% | 8.03% | IASLEVE NQSLR          | 3.53 | 1,358.73 |
| ATP | 6018 | TM9SF4 protein                                                                                               | gi 146186797,gi 166063945,gi 172047290 | 74,351.10  | 100.00% | 3 | 3 | 6 | 0.05% | 6.54% | AENLGE VLR             | 2.74 | 1,000.54 |
| ATP | 6018 | TM9SF4 protein                                                                                               | gi 146186797,gi 166063945,gi 172047290 | 74,351.10  | 100.00% | 3 | 3 | 6 | 0.05% | 6.54% | ISEDYYV HLIADNL PVATR  | 4.36 | 2,189.12 |
| ATP | 6018 | TM9SF4 protein                                                                                               | gi 146186797,gi 166063945,gi 172047290 | 74,351.10  | 100.00% | 3 | 3 | 6 | 0.05% | 6.54% | IVNTPFQ VLMNSE K       | 3.43 | 1,635.84 |
| ATP | 6018 | PREDIC TED: plexin A2                                                                                        | gi 194674254                           | 210,938.30 | 99.80%  | 2 | 2 | 2 | 0.02% | 1.58% | FVDDL FVDDL ETLFSTV HR | 2.67 | 1,825.91 |
| ATP | 6018 | PREDIC TED: plexin A2                                                                                        | gi 194674254                           | 210,938.30 | 99.80%  | 2 | 2 | 2 | 0.02% | 1.58% | QTSSYNI PASASIS R      | 3.49 | 1,581.79 |
| ATP | 6018 | PREDIC TED: similar to plexin B2 isoform 1                                                                   | gi 194681262                           | 204,931.90 | 100.00% | 5 | 5 | 5 | 0.04% | 4.12% | DTAHNL PEFIVK          | 3.07 | 1,383.73 |
| ATP | 6018 | PREDIC TED: similar to plexin B2 isoform 1                                                                   | gi 194681262                           | 204,931.90 | 100.00% | 5 | 5 | 5 | 0.04% | 4.12% | EAFEAY TDHATY K        | 3.87 | 1,545.69 |
| ATP | 6018 | PREDIC TED: similar to plexin B2 isoform 1                                                                   | gi 194681262                           | 204,931.90 | 100.00% | 5 | 5 | 5 | 0.04% | 4.12% | LQQIAA ALENKV TDL      | 3.68 | 1,626.91 |
| ATP | 6018 | PREDIC TED: similar to plexin B2 isoform 1                                                                   | gi 194681262                           | 204,931.90 | 100.00% | 5 | 5 | 5 | 0.04% | 4.12% | NLDTVQ GSPLL V GSDLLK  | 4.66 | 1,869.03 |
| ATP | 6018 | PREDIC TED: similar to plexin B2 isoform 1                                                                   | gi 194681262                           | 204,931.90 | 100.00% | 5 | 5 | 5 | 0.04% | 4.12% | VGVSQQ PEDSQQ DLPGER   | 4.31 | 1,968.93 |

|     |      |                                                                           |                                                                        |           |         |   |   |   |       |        |                          |      |          |
|-----|------|---------------------------------------------------------------------------|------------------------------------------------------------------------|-----------|---------|---|---|---|-------|--------|--------------------------|------|----------|
| ATP | 6018 | PREDIC TED: similar to Glyceraldehyde-3-phosphate dehydrogenase isoform 2 | gi 119893091.gi 1841758.gi 2285903.gi 73587299.gi 77404273.gi 89573947 | 35,850.00 | 100.00% | 3 | 4 | 7 | 0.06% | 15.90% | AITFQERDPANK             | 3.08 | 1,615.88 |
| ATP | 6018 | PREDIC TED: similar to Glyceraldehyde-3-phosphate dehydrogenase isoform 2 | gi 119893091.gi 1841758.gi 2285903.gi 73587299.gi 77404273.gi 89573947 | 35,850.00 | 100.00% | 3 | 4 | 7 | 0.06% | 15.90% | GAAQNIIIPASTGAK          | 4.61 | 1,369.74 |
| ATP | 6018 | PREDIC TED: similar to Glyceraldehyde-3-phosphate dehydrogenase isoform 2 | gi 119893091.gi 1841758.gi 2285903.gi 73587299.gi 77404273.gi 89573947 | 35,850.00 | 100.00% | 3 | 4 | 7 | 0.06% | 15.90% | VIHDHFGIVEGLMTTVHAITATQK | 3.78 | 2,634.37 |
| ATP | 6018 | v-yes-1 hi sarcoma viral oncogene homolog 1                               | gi 155371851                                                           | 60,580.30 | 100.00% | 3 | 4 | 5 | 0.04% | 7.58%  | GRVPYPGMVNR              | 2.83 | 1,261.65 |
| ATP | 6018 | v-yes-1 hi sarcoma viral oncogene homolog 1                               | gi 155371851                                                           | 60,580.30 | 100.00% | 3 | 4 | 5 | 0.04% | 7.58%  | IADFGLAR                 | 2.03 | 862.4782 |
| ATP | 6018 | v-yes-1 hi sarcoma viral oncogene homolog 1                               | gi 155371851                                                           | 60,580.30 | 100.00% | 3 | 4 | 5 | 0.04% | 7.58%  | LVPLYAVVSEEPIYIVTEFMSK   | 3.52 | 2,543.34 |
| ATP | 6018 | TMEM43 protein                                                            | gi 151556045.gi 156523072                                              | 44,774.20 | 100.00% | 4 | 6 | 6 | 0.05% | 18.00% | FFLSAGLIDKVDNFK          | 4.32 | 1,713.92 |
| ATP | 6018 | TMEM43 protein                                                            | gi 151556045.gi 156523072                                              | 44,774.20 | 100.00% | 4 | 6 | 6 | 0.05% | 18.00% | LEDPHVDIIR               | 2.48 | 1,206.65 |
| ATP | 6018 | TMEM43 protein                                                            | gi 151556045.gi 156523072                                              | 44,774.20 | 100.00% | 4 | 6 | 6 | 0.05% | 18.00% | NPSAMAVESFTATAPFVQIGR    | 3.03 | 2,210.09 |



|     |      |                                           |                                                                                               |           |         |   |   |    |       |        |                                            |      |          |
|-----|------|-------------------------------------------|-----------------------------------------------------------------------------------------------|-----------|---------|---|---|----|-------|--------|--------------------------------------------|------|----------|
| ATP | 6018 | TMEM43 protein                            | gi 151556045,gi 156523072                                                                     | 44,774.20 | 100.00% | 4 | 6 | 6  | 0.05% | 18.00% | VSFSYA<br>GLSSDD<br>PDLGPA<br>HVVTVI<br>AR | 3.66 | 2,673.35 |
| ATP | 6018 | intergral membrane protein 1              | gi 114051696,gi 122136222,gi 152941168,gi 86823970                                            | 80,641.10 | 100.00% | 3 | 3 | 6  | 0.05% | 4.68%  | FESVIHE<br>FDPYFN<br>YR                    | 3.53 | 1,962.90 |
| ATP | 6018 | intergral membrane protein 1              | gi 114051696,gi 122136222,gi 152941168,gi 86823970                                            | 80,641.10 | 100.00% | 3 | 3 | 6  | 0.05% | 4.68%  | FYSLLDP<br>SYAK                            | 3.15 | 1,303.66 |
| ATP | 6018 | intergral membrane protein 1              | gi 114051696,gi 122136222,gi 152941168,gi 86823970                                            | 80,641.10 | 100.00% | 3 | 3 | 6  | 0.05% | 4.68%  | IIFDDFR                                    | 2.54 | 925.4779 |
| ATP | 6018 | Myeloid-associated differentiation marker | gi 111308557,gi 115497460                                                                     | 35,291.10 | 100.00% | 3 | 5 | 11 | 0.09% | 14.60% | ARPGEIT<br>GYMATV<br>PGLLK                 | 3.84 | 1,890.02 |
| ATP | 6018 | Myeloid-associated differentiation marker | gi 111308557,gi 115497460                                                                     | 35,291.10 | 100.00% | 3 | 5 | 11 | 0.09% | 14.60% | LVFVRV                                     | 1.97 | 732.4766 |
| ATP | 6018 | Myeloid-associated differentiation marker | gi 111308557,gi 115497460                                                                     | 35,291.10 | 100.00% | 3 | 5 | 11 | 0.09% | 14.60% | TTVTTT<br>MSSSSG<br>LGSPTIV<br>GSPR        | 5.43 | 2,240.11 |
| ATP | 6018 | ribosomal protein L24                     | gi 27806129,gi 28189314,gi 28189753,gi 2819757,gi 28189765,gi 3132823,gi 41019240,gi 74267598 | 17,630.30 | 99.80%  | 2 | 2 | 2  | 0.02% | 13.50% | AITGASL<br>ADIMAK                          | 3.96 | 1,277.68 |
| ATP | 6018 | ribosomal protein L24                     | gi 27806129,gi 28189314,gi 28189753,gi 2819757,gi 28189765,gi 3132823,gi 41019240,gi 74267598 | 17,630.30 | 99.80%  | 2 | 2 | 2  | 0.02% | 13.50% | VFQFLN<br>AK                               | 2.22 | 966.5407 |

|     |      |                                                                                                                                                                                                                                     |                                                                                                                                           |            |         |   |   |   |       |        |                                  |      |          |
|-----|------|-------------------------------------------------------------------------------------------------------------------------------------------------------------------------------------------------------------------------------------|-------------------------------------------------------------------------------------------------------------------------------------------|------------|---------|---|---|---|-------|--------|----------------------------------|------|----------|
| ATP | 6018 | Myosin<br>regulator<br>y light<br>chain<br>MRCL3                                                                                                                                                                                    | gi 1096593<br>59,gi 13402<br>4635,gi 139<br>948749,gi 1<br>48744185,g<br>i 19467809<br>3,gi 205829<br>192,gi 5985<br>8321,gi 627<br>51407 | 19,848.30  | 100.00% | 3 | 4 | 4 | 0.03% | 22.10% | ATSNVF<br>AMFDQS<br>QIQEFK       | 3.32 | 2,106.98 |
| ATP | 6018 | Myosin<br>regulator<br>y light<br>chain<br>MRCL3                                                                                                                                                                                    | gi 1096593<br>59,gi 13402<br>4635,gi 139<br>948749,gi 1<br>48744185,g<br>i 19467809<br>3,gi 205829<br>192,gi 5985<br>8321,gi 627<br>51407 | 19,848.30  | 100.00% | 3 | 4 | 4 | 0.03% | 22.10% | ELLTMM<br>GDRFTD<br>EEVDEL<br>YR | 3.53 | 2,448.12 |
| ATP | 6018 | Myosin<br>regulator<br>y light<br>chain<br>MRCL3                                                                                                                                                                                    | gi 1096593<br>59,gi 13402<br>4635,gi 139<br>948749,gi 1<br>48744185,g<br>i 19467809<br>3,gi 205829<br>192,gi 5985<br>8321,gi 627<br>51407 | 19,848.30  | 100.00% | 3 | 4 | 4 | 0.03% | 22.10% | FTDEEV<br>DELYR                  | 2.9  | 1,415.63 |
| ATP | 6018 | PREDIC<br>TED:<br>similar to<br>Atrial<br>natriureti<br>c peptide<br>receptor<br>A<br>precursor<br>(ANP-A)<br>(ANPRA<br>) (GC-A)<br>(Guanylat<br>e cyclase)<br>(NPR-A)<br>(Atrial<br>natriureti<br>c peptide<br>A-type<br>receptor) | gi 1946650<br>89                                                                                                                          | 119,021.60 | 100.00% | 3 | 3 | 3 | 0.03% | 3.67%  | IITYKEP<br>DNPEYL<br>EFLQK       | 3.41 | 2,240.15 |

|     |      |                                                                                                                                                                              |            |            |         |   |   |    |       |        |                      |          |
|-----|------|------------------------------------------------------------------------------------------------------------------------------------------------------------------------------|------------|------------|---------|---|---|----|-------|--------|----------------------|----------|
| ATP | 6018 | PREDIC TED: 89<br>similar to Atrial natriuretic peptide receptor A precursor (ANP-A) (ANPRA) (GC-A) (Guanylate cyclase) (NPR-A) (Atrial natriuretic peptide A-type receptor) | gi 1946650 | 119,021.60 | 100.00% | 3 | 3 | 3  | 0.03% | 3.67%  | MALALL 2.73<br>DAVR  | 1,088.61 |
| ATP | 6018 | PREDIC TED: 89<br>similar to Atrial natriuretic peptide receptor A precursor (ANP-A) (ANPRA) (GC-A) (Guanylate cyclase) (NPR-A) (Atrial natriuretic peptide A-type receptor) | gi 1946650 | 119,021.60 | 100.00% | 3 | 3 | 3  | 0.03% | 3.67%  | VGPAVE 3.55<br>LALAR | 1,095.65 |
| ATP | 6018 | PREDIC TED: 81,gi 19468<br>similar to 5483 Keratin 10 (epidermolytic hyperkeratosis; keratosis palmaris et plantaris) isoform 2                                              | gi 1946854 | 54,832.90  | 100.00% | 7 | 9 | 17 | 0.15% | 12.00% | DAEAWF 2.96<br>NEK   | 1,109.49 |

|     |      |                                                                                                                                              |           |         |   |   |    |       |        |                |      |          |
|-----|------|----------------------------------------------------------------------------------------------------------------------------------------------|-----------|---------|---|---|----|-------|--------|----------------|------|----------|
| ATP | 6018 | PREDIC TED: gi 1946854 81.gi 19468 similar to 5483<br>Keratin 10 (epiderm olytic hyperkera tosis; keratosis palmaris et plantaris) isoform 2 | 54,832.90 | 100.00% | 7 | 9 | 17 | 0.15% | 12.00% | IRLENEI QTYR   | 4.35 | 1,434.77 |
| ATP | 6018 | PREDIC TED: gi 1946854 81.gi 19468 similar to 5483<br>Keratin 10 (epiderm olytic hyperkera tosis; keratosis palmaris et plantaris) isoform 2 | 54,832.90 | 100.00% | 7 | 9 | 17 | 0.15% | 12.00% | LASYLD KVR     | 2.98 | 1,064.61 |
| ATP | 6018 | PREDIC TED: gi 1946854 81.gi 19468 similar to 5483<br>Keratin 10 (epiderm olytic hyperkera tosis; keratosis palmaris et plantaris) isoform 2 | 54,832.90 | 100.00% | 7 | 9 | 17 | 0.15% | 12.00% | LENEIQT YR     | 3.63 | 1,165.58 |
| ATP | 6018 | PREDIC TED: gi 1946854 81.gi 19468 similar to 5483<br>Keratin 10 (epiderm olytic hyperkera tosis; keratosis palmaris et plantaris) isoform 2 | 54,832.90 | 100.00% | 7 | 9 | 17 | 0.15% | 12.00% | QSLEASL AETEGR | 4.56 | 1,390.68 |
| ATP | 6018 | PREDIC TED: gi 1946854 81.gi 19468 similar to 5483<br>Keratin 10 (epiderm olytic hyperkera tosis; keratosis palmaris et plantaris) isoform 2 | 54,832.90 | 100.00% | 7 | 9 | 17 | 0.15% | 12.00% | RVLDEL TLTK    | 2.82 | 1,187.70 |

|     |      |                                                                                                               |                                   |            |         |   |   |    |       |        |                                        |      |          |
|-----|------|---------------------------------------------------------------------------------------------------------------|-----------------------------------|------------|---------|---|---|----|-------|--------|----------------------------------------|------|----------|
| ATP | 6018 | PREDIC TED: similar to Keratin 10 (epiderm olytic hyperkera tosis; keratosis palmaris et plantaris) isoform 2 | gi 1946854<br>81.gi 19468<br>5483 | 54,832.90  | 100.00% | 7 | 9 | 17 | 0.15% | 12.00% | SQYEQL<br>AEKNR                        | 4.64 | 1,365.68 |
| ATP | 6018 | PREDIC TED: similar to Keratin 10 (epiderm olytic hyperkera tosis; keratosis palmaris et plantaris) isoform 2 | gi 1946854<br>81.gi 19468<br>5483 | 54,832.90  | 100.00% | 7 | 9 | 17 | 0.15% | 12.00% | VLDELT<br>LTK                          | 3.77 | 1,031.60 |
| ATP | 6018 | PREDIC TED: similar to Laminin subunit gamma-1 precursor (Laminin B2 chain)                                   | gi 1946742<br>74                  | 143,183.80 | 99.80%  | 2 | 2 | 2  | 0.02% | 2.78%  | EAQQAL<br>GNAAAD<br>ATEAR              | 3.12 | 1,686.80 |
| ATP | 6018 | PREDIC TED: similar to Laminin subunit gamma-1 precursor (Laminin B2 chain)                                   | gi 1946742<br>74                  | 143,183.80 | 99.80%  | 2 | 2 | 2  | 0.02% | 2.78%  | VSVPLIA<br>QGNSYP<br>SETTVK            | 4.31 | 1,990.05 |
| ATP | 6018 | MATR3 protein                                                                                                 | gi 1340246<br>43.gi 15652<br>3084 | 93,810.30  | 100.00% | 4 | 6 | 6  | 0.05% | 10.30% | DLDELS<br>RYPEDKI<br>TPENLP<br>QILLQLK | 3.91 | 3,080.65 |
| ATP | 6018 | MATR3 protein                                                                                                 | gi 1340246<br>43.gi 15652<br>3084 | 93,810.30  | 100.00% | 4 | 6 | 6  | 0.05% | 10.30% | DSFDDR<br>GPSLNP<br>VLDYDH<br>GSR      | 4.76 | 2,362.07 |
| ATP | 6018 | MATR3 protein                                                                                                 | gi 1340246<br>43.gi 15652<br>3084 | 93,810.30  | 100.00% | 4 | 6 | 6  | 0.05% | 10.30% | VIHLSNL<br>PHSGYS<br>DSAVLK            | 3.87 | 2,037.08 |
| ATP | 6018 | MATR3 protein                                                                                                 | gi 1340246<br>43.gi 15652<br>3084 | 93,810.30  | 100.00% | 4 | 6 | 6  | 0.05% | 10.30% | YQLLQL<br>VEPFGVI<br>SNHLILN<br>K      | 3.62 | 2,438.38 |

|     |      |                                                                                 |                                                                 |            |         |   |   |   |       |        |                                           |          |
|-----|------|---------------------------------------------------------------------------------|-----------------------------------------------------------------|------------|---------|---|---|---|-------|--------|-------------------------------------------|----------|
| ATP | 6018 | PREDIC TED: 09<br>similar to dynein, cytoplasmic, heavy polypeptide 1 isoform 3 | gi 1946770                                                      | 531,935.00 | 100.00% | 3 | 3 | 3 | 0.03% | 1.38%  | ILDDDTII 2.11<br>TTLENL<br>KR             | 1,873.03 |
| ATP | 6018 | PREDIC TED: 09<br>similar to dynein, cytoplasmic, heavy polypeptide 1 isoform 3 | gi 1946770                                                      | 531,935.00 | 100.00% | 3 | 3 | 3 | 0.03% | 1.38%  | KLVPLLL 3.63<br>EDGGEA<br>PAALEA<br>ALEEK | 2,476.35 |
| ATP | 6018 | PREDIC TED: 09<br>similar to dynein, cytoplasmic, heavy polypeptide 1 isoform 3 | gi 1946770                                                      | 531,935.00 | 100.00% | 3 | 3 | 3 | 0.03% | 1.38%  | VLRPQV 2.79<br>TAVAQQ<br>NQGEVP<br>EPQDMK | 2,678.36 |
| ATP | 6018 | Mannose-6-phosphate receptor (cation dependent)                                 | gi 1113085<br>51.gi 11993<br>6494.gi 127<br>292.gi 2846<br>1185 | 31,183.50  | 100.00% | 4 | 6 | 8 | 0.07% | 23.30% | GKESEK 3.78<br>ELALLK                     | 1,344.77 |
| ATP | 6018 | Mannose-6-phosphate receptor (cation dependent)                                 | gi 1113085<br>51.gi 11993<br>6494.gi 127<br>292.gi 2846<br>1185 | 31,183.50  | 100.00% | 4 | 6 | 8 | 0.07% | 23.30% | GVGDDQ 3.26<br>LGEESSE<br>RDDHLL<br>PM    | 2,357.02 |
| ATP | 6018 | Mannose-6-phosphate receptor (cation dependent)                                 | gi 1113085<br>51.gi 11993<br>6494.gi 127<br>292.gi 2846<br>1185 | 31,183.50  | 100.00% | 4 | 6 | 8 | 0.07% | 23.30% | HTLADN 4.71<br>FNPVSEER                   | 1,628.77 |
| ATP | 6018 | Mannose-6-phosphate receptor (cation dependent)                                 | gi 1113085<br>51.gi 11993<br>6494.gi 127<br>292.gi 2846<br>1185 | 31,183.50  | 100.00% | 4 | 6 | 8 | 0.07% | 23.30% | SFESTVG 4.2<br>QSPDMY<br>SYVFR            | 2,115.93 |

|     |      |                                                                                        |                                                                 |           |         |   |   |   |       |        |                                        |          |
|-----|------|----------------------------------------------------------------------------------------|-----------------------------------------------------------------|-----------|---------|---|---|---|-------|--------|----------------------------------------|----------|
| ATP | 6018 | UDP-<br>Gal:beta<br>GlcNAc<br>beta 1,4-<br>galactosyl<br>transferase,<br>polypeptide 1 | gi 1113086<br>49,gi 11624<br>1263                               | 44,825.80 | 99.90%  | 2 | 2 | 2 | 0.02% | 5.22%  | GMSVSR 2.53<br>PNAVIG<br>K             | 1,331.71 |
| ATP | 6018 | UDP-<br>Gal:beta<br>GlcNAc<br>beta 1,4-<br>galactosyl<br>transferase,<br>polypeptide 1 | gi 1113086<br>49,gi 11624<br>1263                               | 44,825.80 | 99.90%  | 2 | 2 | 2 | 0.02% | 5.22%  | VAIIPFR 2.03                           | 928.5979 |
| ATP | 6018 | ADP-<br>ribosylation-like<br>factor 6<br>interacting protein 5                         | gi 5985816<br>3,gi 624604<br>74,gi 74354<br>855,gi 7505<br>7806 | 21,648.60 | 99.80%  | 2 | 3 | 9 | 0.08% | 13.80% | FARPDF 1.98<br>R                       | 908.4737 |
| ATP | 6018 | ADP-<br>ribosylation-like<br>factor 6<br>interacting protein 5                         | gi 5985816<br>3,gi 624604<br>74,gi 74354<br>855,gi 7505<br>7806 | 21,648.60 | 99.80%  | 2 | 3 | 9 | 0.08% | 13.80% | TPMGIV 5.38<br>LDALEQ<br>QEETITK       | 2,132.08 |
| ATP | 6018 | Ectonucleotide<br>pyrophosphatase/p<br>hosphodiesterase 4<br>(putative<br>function)    | gi 1248290<br>38,gi 12563<br>0707,gi 171<br>769867              | 51,147.90 | 100.00% | 3 | 3 | 4 | 0.03% | 9.27%  | ADYLQN 4.84<br>YEFPHL<br>QNFIK         | 2,140.05 |
| ATP | 6018 | Ectonucleotide<br>pyrophosphatase/p<br>hosphodiesterase 4<br>(putative<br>function)    | gi 1248290<br>38,gi 12563<br>0707,gi 171<br>769867              | 51,147.90 | 100.00% | 3 | 3 | 4 | 0.03% | 9.27%  | LLVVSFD 3.36<br>GFR                    | 1,166.66 |
| ATP | 6018 | Ectonucleotide<br>pyrophosphatase/p<br>hosphodiesterase 4<br>(putative<br>function)    | gi 1248290<br>38,gi 12563<br>0707,gi 171<br>769867              | 51,147.90 | 100.00% | 3 | 3 | 4 | 0.03% | 9.27%  | VLEEIDE 3.02<br>HIGELV<br>HR           | 1,787.93 |
| ATP | 6018 | Heterogeneous<br>nuclear<br>ribonucleoprotein U<br>(scaffold<br>attachment factor A)   | gi 1248289<br>88,gi 12599<br>1756                               | 90,435.30 | 100.00% | 3 | 3 | 5 | 0.04% | 8.36%  | EKPYFPI 4.5<br>PEDYTFI<br>QNVPLE<br>DR | 2,710.34 |

|     |      |                                                                          |                                       |           |         |   |   |   |       |        |                                                      |      |          |
|-----|------|--------------------------------------------------------------------------|---------------------------------------|-----------|---------|---|---|---|-------|--------|------------------------------------------------------|------|----------|
| ATP | 6018 | Heterogeneous nuclear ribonucleoprotein U (scaffold attachment factor A) | gi 124828988,gi 125991756             | 90,435.30 | 100.00% | 3 | 3 | 5 | 0.04% | 8.36%  | LQAALD<br>DEEAGG<br>RPAMEP<br>GNGSLD<br>LGGDSA<br>GR | 6.31 | 3,142.43 |
| ATP | 6018 | Heterogeneous nuclear ribonucleoprotein U (scaffold attachment factor A) | gi 124828988,gi 125991756             | 90,435.30 | 100.00% | 3 | 3 | 5 | 0.04% | 8.36%  | NFILDQT<br>NVSAAA<br>QR                              | 3.52 | 1,647.84 |
| ATP | 6018 | DPYSL3 protein                                                           | gi 154426078,gi 155371867             | 73,970.90 | 100.00% | 5 | 5 | 5 | 0.04% | 10.80% | EESREPA<br>PASPAPA<br>GVEIR                          | 4.31 | 1,962.99 |
| ATP | 6018 | DPYSL3 protein                                                           | gi 154426078,gi 155371867             | 73,970.90 | 100.00% | 5 | 5 | 5 | 0.04% | 10.80% | IFNLYPR                                              | 2.31 | 922.5145 |
| ATP | 6018 | DPYSL3 protein                                                           | gi 154426078,gi 155371867             | 73,970.90 | 100.00% | 5 | 5 | 5 | 0.04% | 10.80% | MDENQF<br>VAVTST<br>NAAK                             | 3.45 | 1,741.81 |
| ATP | 6018 | DPYSL3 protein                                                           | gi 154426078,gi 155371867             | 73,970.90 | 100.00% | 5 | 5 | 5 | 0.04% | 10.80% | NLHQSG<br>FSLSGTQ<br>VDEGVR                          | 3.79 | 2,030.99 |
| ATP | 6018 | DPYSL3 protein                                                           | gi 154426078,gi 155371867             | 73,970.90 | 100.00% | 5 | 5 | 5 | 0.04% | 10.80% | QIGDNLI<br>VPGGVK                                    | 2.67 | 1,309.75 |
| ATP | 6018 | RecName : Full=Receptor expression-enhancing protein 5                   | gi 109892956,gi 114053301,gi 88954091 | 21,400.00 | 99.80%  | 2 | 2 | 2 | 0.02% | 12.20% | HESQVD<br>NVVNDL<br>KDK                              | 3.06 | 1,739.86 |
| ATP | 6018 | RecName : Full=Receptor expression-enhancing protein 5                   | gi 109892956,gi 114053301,gi 88954091 | 21,400.00 | 99.80%  | 2 | 2 | 2 | 0.02% | 12.20% | IIRPFFLK                                             | 2.28 | 1,033.66 |
| ATP | 6018 | TOMM22 protein                                                           | gi 151556851,gi 154152189             | 15,275.00 | 100.00% | 3 | 3 | 4 | 0.03% | 44.30% | GDAEKP<br>EEEEEEE<br>DDEELD<br>ETLSER                | 5.55 | 2,935.23 |
| ATP | 6018 | TOMM22 protein                                                           | gi 151556851,gi 154152189             | 15,275.00 | 100.00% | 3 | 3 | 4 | 0.03% | 44.30% | LQMEQQ<br>QQLQQR                                     | 3.24 | 1,573.78 |
| ATP | 6018 | TOMM22 protein                                                           | gi 151556851,gi 154152189             | 15,275.00 | 100.00% | 3 | 3 | 4 | 0.03% | 44.30% | QILLGPN<br>TGLSGG<br>MPGALP<br>SLPGKI                | 4.45 | 2,404.33 |



|     |      |                                                                                                           |                                                                                                                                                         |           |         |    |    |    |       |        |                                                |      |          |
|-----|------|-----------------------------------------------------------------------------------------------------------|---------------------------------------------------------------------------------------------------------------------------------------------------------|-----------|---------|----|----|----|-------|--------|------------------------------------------------|------|----------|
| ATP | 6018 | RecName<br>:<br>Full=AT<br>P<br>synthase<br>subunit<br>beta,<br>mitochon<br>drial;<br>Flags:<br>Precursor | gi 114543.g<br>i 15842902<br>3,gi 158429<br>024,gi 1584<br>29025,gi 15<br>8431069,gi <br>158431070,<br>gi 1584310<br>71,gi 28461<br>221,gi 9457<br>4271 | 51,687.60 | 100.00% | 15 | 17 | 27 | 0.23% | 53.50% | AIAELGI<br>YPAVDP<br>LDSTSR                    | 4.68 | 1,988.03 |
| ATP | 6018 | RecName<br>:<br>Full=AT<br>P<br>synthase<br>subunit<br>beta,<br>mitochon<br>drial;<br>Flags:<br>Precursor | gi 114543.g<br>i 15842902<br>3,gi 158429<br>024,gi 1584<br>29025,gi 15<br>8431069,gi <br>158431070,<br>gi 1584310<br>71,gi 28461<br>221,gi 9457<br>4271 | 51,687.60 | 100.00% | 15 | 17 | 27 | 0.23% | 53.50% | DQEGQD<br>VLLFIDN<br>IFR                       | 4.51 | 1,921.97 |
| ATP | 6018 | RecName<br>:<br>Full=AT<br>P<br>synthase<br>subunit<br>beta,<br>mitochon<br>drial;<br>Flags:<br>Precursor | gi 114543.g<br>i 15842902<br>3,gi 158429<br>024,gi 1584<br>29025,gi 15<br>8431069,gi <br>158431070,<br>gi 1584310<br>71,gi 28461<br>221,gi 9457<br>4271 | 51,687.60 | 100.00% | 15 | 17 | 27 | 0.23% | 53.50% | GFQQILA<br>GEYDHL<br>PEQAFY<br>MVGPIE<br>EAVAK | 3.63 | 3,350.64 |
| ATP | 6018 | RecName<br>:<br>Full=AT<br>P<br>synthase<br>subunit<br>beta,<br>mitochon<br>drial;<br>Flags:<br>Precursor | gi 114543.g<br>i 15842902<br>3,gi 158429<br>024,gi 1584<br>29025,gi 15<br>8431069,gi <br>158431070,<br>gi 1584310<br>71,gi 28461<br>221,gi 9457<br>4271 | 51,687.60 | 100.00% | 15 | 17 | 27 | 0.23% | 53.50% | IMDPNIV<br>GSEHYD<br>VAR                       | 3.14 | 1,831.86 |
| ATP | 6018 | RecName<br>:<br>Full=AT<br>P<br>synthase<br>subunit<br>beta,<br>mitochon<br>drial;<br>Flags:<br>Precursor | gi 114543.g<br>i 15842902<br>3,gi 158429<br>024,gi 1584<br>29025,gi 15<br>8431069,gi <br>158431070,<br>gi 1584310<br>71,gi 28461<br>221,gi 9457<br>4271 | 51,687.60 | 100.00% | 15 | 17 | 27 | 0.23% | 53.50% | IMNVIGE<br>PIDER                               | 2.69 | 1,401.70 |

|     |      |                                                                                                           |                                                                                                                                                         |           |         |    |    |    |       |        |                                               |      |          |
|-----|------|-----------------------------------------------------------------------------------------------------------|---------------------------------------------------------------------------------------------------------------------------------------------------------|-----------|---------|----|----|----|-------|--------|-----------------------------------------------|------|----------|
| ATP | 6018 | RecName<br>:<br>Full=AT<br>P<br>synthase<br>subunit<br>beta,<br>mitochon<br>drial;<br>Flags:<br>Precursor | gi 114543.g<br>i 15842902<br>3,gi 158429<br>024,gi 1584<br>29025,gi 15<br>8431069,gi <br>158431070,<br>gi 1584310<br>71,gi 28461<br>221,gi 9457<br>4271 | 51,687.60 | 100.00% | 15 | 17 | 27 | 0.23% | 53.50% | IPVGPET<br>LGR                                | 3.14 | 1,038.59 |
| ATP | 6018 | RecName<br>:<br>Full=AT<br>P<br>synthase<br>subunit<br>beta,<br>mitochon<br>drial;<br>Flags:<br>Precursor | gi 114543.g<br>i 15842902<br>3,gi 158429<br>024,gi 1584<br>29025,gi 15<br>8431069,gi <br>158431070,<br>gi 1584310<br>71,gi 28461<br>221,gi 9457<br>4271 | 51,687.60 | 100.00% | 15 | 17 | 27 | 0.23% | 53.50% | IVAVIGA<br>VVDVQF<br>DEGLPPI<br>LNALEV<br>QGR | 3.04 | 3,031.68 |
| ATP | 6018 | RecName<br>:<br>Full=AT<br>P<br>synthase<br>subunit<br>beta,<br>mitochon<br>drial;<br>Flags:<br>Precursor | gi 114543.g<br>i 15842902<br>3,gi 158429<br>024,gi 1584<br>29025,gi 15<br>8431069,gi <br>158431070,<br>gi 1584310<br>71,gi 28461<br>221,gi 9457<br>4271 | 51,687.60 | 100.00% | 15 | 17 | 27 | 0.23% | 53.50% | LVLEVA<br>QHLGES<br>TVR                       | 3.39 | 1,650.92 |
| ATP | 6018 | RecName<br>:<br>Full=AT<br>P<br>synthase<br>subunit<br>beta,<br>mitochon<br>drial;<br>Flags:<br>Precursor | gi 114543.g<br>i 15842902<br>3,gi 158429<br>024,gi 1584<br>29025,gi 15<br>8431069,gi <br>158431070,<br>gi 1584310<br>71,gi 28461<br>221,gi 9457<br>4271 | 51,687.60 | 100.00% | 15 | 17 | 27 | 0.23% | 53.50% | QFAAIH<br>AEAPEF<br>VEMSVE<br>QEILVTG<br>IK   | 3.68 | 3,002.52 |
| ATP | 6018 | RecName<br>:<br>Full=AT<br>P<br>synthase<br>subunit<br>beta,<br>mitochon<br>drial;<br>Flags:<br>Precursor | gi 114543.g<br>i 15842902<br>3,gi 158429<br>024,gi 1584<br>29025,gi 15<br>8431069,gi <br>158431070,<br>gi 1584310<br>71,gi 28461<br>221,gi 9457<br>4271 | 51,687.60 | 100.00% | 15 | 17 | 27 | 0.23% | 53.50% | SLQDIIAI<br>LGMDEL<br>SEEDKL<br>TVSR          | 2.79 | 2,691.38 |

|     |      |                                                                                                           |                                                                                                                                                         |           |         |    |    |    |       |        |                                  |          |
|-----|------|-----------------------------------------------------------------------------------------------------------|---------------------------------------------------------------------------------------------------------------------------------------------------------|-----------|---------|----|----|----|-------|--------|----------------------------------|----------|
| ATP | 6018 | RecName<br>:<br>Full=AT<br>P<br>synthase<br>subunit<br>beta,<br>mitochon<br>drial;<br>Flags:<br>Precursor | gi 114543.g<br>i 15842902<br>3,gi 158429<br>024,gi 1584<br>29025,gi 15<br>8431069,gi <br>158431070,<br>gi 1584310<br>71,gi 28461<br>221,gi 9457<br>4271 | 51,687.60 | 100.00% | 15 | 17 | 27 | 0.23% | 53.50% | TVLIMEL 4.59<br>INNVAK           | 1,473.83 |
| ATP | 6018 | RecName<br>:<br>Full=AT<br>P<br>synthase<br>subunit<br>beta,<br>mitochon<br>drial;<br>Flags:<br>Precursor | gi 114543.g<br>i 15842902<br>3,gi 158429<br>024,gi 1584<br>29025,gi 15<br>8431069,gi <br>158431070,<br>gi 1584310<br>71,gi 28461<br>221,gi 9457<br>4271 | 51,687.60 | 100.00% | 15 | 17 | 27 | 0.23% | 53.50% | VALTGL 3.52<br>TVAEYF<br>R       | 1,439.79 |
| ATP | 6018 | RecName<br>:<br>Full=AT<br>P<br>synthase<br>subunit<br>beta,<br>mitochon<br>drial;<br>Flags:<br>Precursor | gi 114543.g<br>i 15842902<br>3,gi 158429<br>024,gi 1584<br>29025,gi 15<br>8431069,gi <br>158431070,<br>gi 1584310<br>71,gi 28461<br>221,gi 9457<br>4271 | 51,687.60 | 100.00% | 15 | 17 | 27 | 0.23% | 53.50% | VALVYG 4.39<br>QMNEPP<br>GAR     | 1,617.81 |
| ATP | 6018 | RecName<br>:<br>Full=AT<br>P<br>synthase<br>subunit<br>beta,<br>mitochon<br>drial;<br>Flags:<br>Precursor | gi 114543.g<br>i 15842902<br>3,gi 158429<br>024,gi 1584<br>29025,gi 15<br>8431069,gi <br>158431070,<br>gi 1584310<br>71,gi 28461<br>221,gi 9457<br>4271 | 51,687.60 | 100.00% | 15 | 17 | 27 | 0.23% | 53.50% | VLDSGA 4.01<br>PIRIPVG<br>PETLGR | 1,947.10 |
| ATP | 6018 | RecName<br>:<br>Full=AT<br>P<br>synthase<br>subunit<br>beta,<br>mitochon<br>drial;<br>Flags:<br>Precursor | gi 114543.g<br>i 15842902<br>3,gi 158429<br>024,gi 1584<br>29025,gi 15<br>8431069,gi <br>158431070,<br>gi 1584310<br>71,gi 28461<br>221,gi 9457<br>4271 | 51,687.60 | 100.00% | 15 | 17 | 27 | 0.23% | 53.50% | VVDLLA 2.53<br>PYAK              | 1,088.64 |
| ATP | 6018 | RecName<br>:<br>Full=Sto<br>matin-<br>like<br>protein 2;<br>Short=SL<br>P-2                               | gi 1185738<br>93,gi 14874<br>5563,gi 816<br>74229,gi 84<br>000113<br>4271                                                                               | 38,715.70 | 100.00% | 4  | 6  | 7  | 0.06% | 18.80% | AEQINQ 4.05<br>AAGEAS<br>AVLAK   | 1,670.87 |

|     |      |                                                                             |                                                                   |            |         |   |   |    |       |        |                                         |          |
|-----|------|-----------------------------------------------------------------------------|-------------------------------------------------------------------|------------|---------|---|---|----|-------|--------|-----------------------------------------|----------|
| ATP | 6018 | RecName<br>:<br>Full=Sto<br>matin-<br>like<br>protein 2;<br>Short=SL<br>P-2 | gi 1185738<br>93,gi 14874<br>5563,gi 816<br>74229,gi 84<br>000113 | 38,715.70  | 100.00% | 4 | 6 | 7  | 0.06% | 18.80% | ASYGVE 4.34<br>DPEYAV<br>TQLAQT<br>TMR  | 2,346.09 |
| ATP | 6018 | RecName<br>:<br>Full=Sto<br>matin-<br>like<br>protein 2;<br>Short=SL<br>P-2 | gi 1185738<br>93,gi 14874<br>5563,gi 816<br>74229,gi 84<br>000113 | 38,715.70  | 100.00% | 4 | 6 | 7  | 0.06% | 18.80% | ILEPGLN 3.54<br>ILIPVLD<br>R            | 1,675.02 |
| ATP | 6018 | RecName<br>:<br>Full=Sto<br>matin-<br>like<br>protein 2;<br>Short=SL<br>P-2 | gi 1185738<br>93,gi 14874<br>5563,gi 816<br>74229,gi 84<br>000113 | 38,715.70  | 100.00% | 4 | 6 | 7  | 0.06% | 18.80% | STDASL 3.25<br>DEELDR<br>VK             | 1,577.77 |
| ATP | 6018 | PREDIC<br>TED:<br>similar to<br>CD109,<br>partial                           | gi 1199213<br>75                                                  | 142,518.70 | 100.00% | 6 | 7 | 9  | 0.08% | 7.45%  | FVDENE 4.01<br>GYLVDI<br>HDFSLG<br>SSPR | 2,496.17 |
| ATP | 6018 | PREDIC<br>TED:<br>similar to<br>CD109,<br>partial                           | gi 1199213<br>75                                                  | 142,518.70 | 100.00% | 6 | 7 | 9  | 0.08% | 7.45%  | IEFPILDD 3.54<br>SSELQV<br>K            | 1,732.90 |
| ATP | 6018 | PREDIC<br>TED:<br>similar to<br>CD109,<br>partial                           | gi 1199213<br>75                                                  | 142,518.70 | 100.00% | 6 | 7 | 9  | 0.08% | 7.45%  | IPVQLVF 2.71<br>K                       | 943.5976 |
| ATP | 6018 | PREDIC<br>TED:<br>similar to<br>CD109,<br>partial                           | gi 1199213<br>75                                                  | 142,518.70 | 100.00% | 6 | 7 | 9  | 0.08% | 7.45%  | SPVTLT 4.98<br>AYIVTSL<br>LGYK          | 1,826.03 |
| ATP | 6018 | PREDIC<br>TED:<br>similar to<br>CD109,<br>partial                           | gi 1199213<br>75                                                  | 142,518.70 | 100.00% | 6 | 7 | 9  | 0.08% | 7.45%  | SYSQSIL 3.68<br>LDLTDS<br>TLQTTL<br>K   | 2,227.17 |
| ATP | 6018 | PREDIC<br>TED:<br>similar to<br>CD109,<br>partial                           | gi 1199213<br>75                                                  | 142,518.70 | 100.00% | 6 | 7 | 9  | 0.08% | 7.45%  | VGSPFEL 4.19<br>VVIGNK                  | 1,358.77 |
| ATP | 6018 | SSR1<br>protein                                                             | gi 1515536<br>10,gi 15612<br>0891,gi 187<br>611488                | 32,036.80  | 100.00% | 4 | 5 | 16 | 0.14% | 21.70% | FLVGFT 2.52<br>NK                       | 925.5142 |
| ATP | 6018 | SSR1<br>protein                                                             | gi 1515536<br>10,gi 15612<br>0891,gi 187<br>611488                | 32,036.80  | 100.00% | 4 | 5 | 16 | 0.14% | 21.70% | GEDFPA 3.17<br>NNIVK                    | 1,203.60 |
| ATP | 6018 | SSR1<br>protein                                                             | gi 1515536<br>10,gi 15612<br>0891,gi 187<br>611488                | 32,036.80  | 100.00% | 4 | 5 | 16 | 0.14% | 21.70% | GTEDFIV 4.54<br>ESLDASF<br>R            | 1,685.80 |

|     |      |                                        |                                                 |           |         |   |   |    |       |        |                                                     |          |
|-----|------|----------------------------------------|-------------------------------------------------|-----------|---------|---|---|----|-------|--------|-----------------------------------------------------|----------|
| ATP | 6018 | SSR1 protein                           | gi 151553610,gi 156120891,gi 187611488          | 32,036.80 | 100.00% | 4 | 5 | 16 | 0.14% | 21.70% | QATFEY 2.74<br>SFIPAEP<br>MGGRPF<br>GLVINLN<br>YK   | 3,175.59 |
| ATP | 6018 | EH-domain containin g 2                | gi 114051716,gi 86822020                        | 61,201.30 | 100.00% | 7 | 8 | 9  | 0.08% | 21.40% | FGTFHSP 3.33<br>ALEDAD<br>FDGKPM<br>VLVAGQ<br>YSTGK | 3,201.52 |
| ATP | 6018 | EH-domain containin g 2                | gi 114051716,gi 86822020                        | 61,201.30 | 100.00% | 7 | 8 | 9  | 0.08% | 21.40% | LEGHGL 3.25<br>PTNLPR                               | 1,303.71 |
| ATP | 6018 | EH-domain containin g 2                | gi 114051716,gi 86822020                        | 61,201.30 | 100.00% | 7 | 8 | 9  | 0.08% | 21.40% | LFELEEQ 3.59<br>DLFR                                | 1,438.72 |
| ATP | 6018 | EH-domain containin g 2                | gi 114051716,gi 86822020                        | 61,201.30 | 100.00% | 7 | 8 | 9  | 0.08% | 21.40% | LFELEEQ 4.24<br>DLFRDIQ<br>GLPR                     | 2,218.15 |
| ATP | 6018 | EH-domain containin g 2                | gi 114051716,gi 86822020                        | 61,201.30 | 100.00% | 7 | 8 | 9  | 0.08% | 21.40% | LLEALD 4.51<br>EMLTHD<br>IAK                        | 1,727.89 |
| ATP | 6018 | EH-domain containin g 2                | gi 114051716,gi 86822020                        | 61,201.30 | 100.00% | 7 | 8 | 9  | 0.08% | 21.40% | LSDVDR 4.38<br>DGMLDD<br>EEFALAS<br>HLIEAK          | 2,805.33 |
| ATP | 6018 | EH-domain containin g 2                | gi 114051716,gi 86822020                        | 61,201.30 | 100.00% | 7 | 8 | 9  | 0.08% | 21.40% | SKYDEIF 4.38<br>YNLAPA<br>DGK                       | 1,830.89 |
| ATP | 6018 | GTP-binding protein MX2                | gi 13430404,gi 27806835,gi 75066885             | 81,436.40 | 100.00% | 3 | 4 | 4  | 0.03% | 7.32%  | ALGVEQ 3.85<br>DLALPAI<br>AVIGDQ<br>SSGK            | 2,252.21 |
| ATP | 6018 | GTP-binding protein MX2                | gi 13430404,gi 27806835,gi 75066885             | 81,436.40 | 100.00% | 3 | 4 | 4  | 0.03% | 7.32%  | SSVLEAL 4.63<br>SGVALP<br>R                         | 1,398.80 |
| ATP | 6018 | GTP-binding protein MX2                | gi 13430404,gi 27806835,gi 75066885             | 81,436.40 | 100.00% | 3 | 4 | 4  | 0.03% | 7.32%  | VAVENQ 3.54<br>PQDIGLQ<br>IK                        | 1,651.90 |
| ATP | 6018 | coiled-coil-helix domain containin g 3 | gi 59858339,gi 62510470,gi 74354006,gi 78365273 | 26,082.40 | 100.00% | 5 | 5 | 9  | 0.08% | 18.10% | KQDAFY 3.81<br>KEQLAR                               | 1,496.79 |
| ATP | 6018 | coiled-coil-helix domain containin g 3 | gi 59858339,gi 62510470,gi 74354006,gi 78365273 | 26,082.40 | 100.00% | 5 | 5 | 9  | 0.08% | 18.10% | RVAEEL 4.3<br>ALEQAK<br>K                           | 1,484.84 |
| ATP | 6018 | coiled-coil-helix domain containin g 3 | gi 59858339,gi 62510470,gi 74354006,gi 78365273 | 26,082.40 | 100.00% | 5 | 5 | 9  | 0.08% | 18.10% | RVTFEA 2.83<br>DENENIT<br>VVK                       | 1,863.94 |

|     |      |                                                                                                                                  |           |         |    |    |    |       |        |                                           |      |          |
|-----|------|----------------------------------------------------------------------------------------------------------------------------------|-----------|---------|----|----|----|-------|--------|-------------------------------------------|------|----------|
| ATP | 6018 | coiled-coil-helix-9,gi5985833<br>coiled-coil-helix-70,gi74354<br>coiled-coil-helix-006,gi7836<br>domain 5273<br>containin<br>g 3 | 26,082.40 | 100.00% | 5  | 5  | 9  | 0.08% | 18.10% | VAEELA<br>LEQAK                           | 4.34 | 1,200.65 |
| ATP | 6018 | coiled-coil-helix-9,gi5985833<br>coiled-coil-helix-70,gi74354<br>coiled-coil-helix-006,gi7836<br>domain 5273<br>containin<br>g 3 | 26,082.40 | 100.00% | 5  | 5  | 9  | 0.08% | 18.10% | VAEELA<br>LEQAKK                          | 4.29 | 1,328.74 |
| ATP | 6018 | integrin beta 1<br>gi1111831<br>55,gi21856<br>3327                                                                               | 88,075.70 | 100.00% | 10 | 13 | 36 | 0.31% | 18.90% | AEDYPID<br>LYYLM<br>LSYSMK<br>DDLENV<br>K | 3.45 | 3,159.44 |
| ATP | 6018 | integrin beta 1<br>gi1111831<br>55,gi21856<br>3327                                                                               | 88,075.70 | 100.00% | 10 | 13 | 36 | 0.31% | 18.90% | LLVFSTD<br>AGFHFA<br>GDGK                 | 2.07 | 1,781.89 |
| ATP | 6018 | integrin beta 1<br>gi1111831<br>55,gi21856<br>3327                                                                               | 88,075.70 | 100.00% | 10 | 13 | 36 | 0.31% | 18.90% | LPEGVTI<br>NYK                            | 3.14 | 1,133.62 |
| ATP | 6018 | integrin beta 1<br>gi1111831<br>55,gi21856<br>3327                                                                               | 88,075.70 | 100.00% | 10 | 13 | 36 | 0.31% | 18.90% | LQPEDIT<br>QIQPQQ<br>VLQLR                | 5.85 | 2,260.27 |
| ATP | 6018 | integrin beta 1<br>gi1111831<br>55,gi21856<br>3327                                                                               | 88,075.70 | 100.00% | 10 | 13 | 36 | 0.31% | 18.90% | LSENNIQ<br>TIFAVTE<br>EFQPVY<br>K         | 5.04 | 2,470.25 |
| ATP | 6018 | integrin beta 1<br>gi1111831<br>55,gi21856<br>3327                                                                               | 88,075.70 | 100.00% | 10 | 13 | 36 | 0.31% | 18.90% | NVLST<br>DKGEVF<br>NELVGK                 | 4.35 | 1,962.05 |
| ATP | 6018 | integrin beta 1<br>gi1111831<br>55,gi21856<br>3327                                                                               | 88,075.70 | 100.00% | 10 | 13 | 36 | 0.31% | 18.90% | SGEPQTF<br>TLK                            | 2.51 | 1,107.57 |
| ATP | 6018 | integrin beta 1<br>gi1111831<br>55,gi21856<br>3327                                                                               | 88,075.70 | 100.00% | 10 | 13 | 36 | 0.31% | 18.90% | SKGTAE<br>KLQPEDI<br>TQIQPQQ<br>LVLQLR    | 2.69 | 2,961.64 |
| ATP | 6018 | integrin beta 1<br>gi1111831<br>55,gi21856<br>3327                                                                               | 88,075.70 | 100.00% | 10 | 13 | 36 | 0.31% | 18.90% | SLGTDL<br>MNEMR                           | 3.05 | 1,282.58 |
| ATP | 6018 | integrin beta 1<br>gi1111831<br>55,gi21856<br>3327                                                                               | 88,075.70 | 100.00% | 10 | 13 | 36 | 0.31% | 18.90% | TVMPYI<br>STTPAK                          | 3.26 | 1,324.68 |
| ATP | 6018 | TPM3 protein 2<br>gi7915347                                                                                                      | 29,015.30 | 100.00% | 7  | 8  | 9  | 0.08% | 31.50% | ALKDEE<br>KMELQE<br>IQLK                  | 3.27 | 1,961.03 |
| ATP | 6018 | TPM3 protein 2<br>gi7915347                                                                                                      | 29,015.30 | 100.00% | 7  | 8  | 9  | 0.08% | 31.50% | IQLVEEE<br>LDR                            | 3.08 | 1,243.65 |
| ATP | 6018 | TPM3 protein 2<br>gi7915347                                                                                                      | 29,015.30 | 100.00% | 7  | 8  | 9  | 0.08% | 31.50% | IQLVEEE<br>LDRAQE<br>R                    | 3.79 | 1,727.89 |
| ATP | 6018 | TPM3 protein 2<br>gi7915347                                                                                                      | 29,015.30 | 100.00% | 7  | 8  | 9  | 0.08% | 31.50% | KIQVLQ<br>QQADDA<br>EERAER                | 3.11 | 2,127.08 |
| ATP | 6018 | TPM3 protein 2<br>gi7915347                                                                                                      | 29,015.30 | 100.00% | 7  | 8  | 9  | 0.08% | 31.50% | LEEAEK<br>AADESE<br>RGMK                  | 3.77 | 1,808.83 |
| ATP | 6018 | TPM3 protein 2<br>gi7915347                                                                                                      | 29,015.30 | 100.00% | 7  | 8  | 9  | 0.08% | 31.50% | RIQLVEE<br>ELDRAQ<br>ER                   | 2.56 | 1,883.99 |

|     |      |                                                                                                                                              |                          |           |         |   |   |   |       |        |                  |      |          |
|-----|------|----------------------------------------------------------------------------------------------------------------------------------------------|--------------------------|-----------|---------|---|---|---|-------|--------|------------------|------|----------|
| ATP | 6018 | TPM3 protein 2                                                                                                                               | gi 7915347               | 29,015.30 | 100.00% | 7 | 8 | 9 | 0.08% | 31.50% | YSQKED KYEEEEIK  | 3.54 | 1,688.80 |
| ATP | 6018 | RecName : Full=Voltage-dependent anion-selective channel protein 3; Short=VDAC-3; AltName: Full=Outer mitochondrial membrane protein porin 3 | gi 1312445 : 2,gi 148878 | 30,853.30 | 100.00% | 4 | 5 | 7 | 0.06% | 19.40% | LSQNNF ALGYK     | 3.77 | 1,254.65 |
| ATP | 6018 | RecName : Full=Voltage-dependent anion-selective channel protein 3; Short=VDAC-3; AltName: Full=Outer mitochondrial membrane protein porin 3 | gi 1312445 : 2,gi 148878 | 30,853.30 | 100.00% | 4 | 5 | 7 | 0.06% | 19.40% | LTLDTIF VPNTGK   | 4.65 | 1,418.79 |
| ATP | 6018 | RecName : Full=Voltage-dependent anion-selective channel protein 3; Short=VDAC-3; AltName: Full=Outer mitochondrial membrane protein porin 3 | gi 1312445 : 2,gi 148878 | 30,853.30 | 100.00% | 4 | 5 | 7 | 0.06% | 19.40% | LTLDTIF VPNTGK K | 2.39 | 1,546.88 |

|     |      |                                                                                                                                                                                                                                                                |           |         |   |   |    |       |        |                                       |          |
|-----|------|----------------------------------------------------------------------------------------------------------------------------------------------------------------------------------------------------------------------------------------------------------------|-----------|---------|---|---|----|-------|--------|---------------------------------------|----------|
| ATP | 6018 | RecName gi 1312445<br>: 2,gi 148878<br>Full=Volt 077,gi 2780<br>age- 7415,gi 881<br>dependen 0224<br>t anion-<br>selective<br>channel<br>protein 3;<br>Short=V<br>DAC-3;<br>AltName:<br>Full=Out<br>er<br>mitochon<br>drial<br>membran<br>e protein<br>porin 3 | 30,853.30 | 100.00% | 4 | 5 | 7  | 0.06% | 19.40% | LTLSALI 3.89<br>DGK                   | 1,030.61 |
| ATP | 6018 | RecName gi 1312445<br>: 2,gi 148878<br>Full=Volt 077,gi 2780<br>age- 7415,gi 881<br>dependen 0224<br>t anion-<br>selective<br>channel<br>protein 3;<br>Short=V<br>DAC-3;<br>AltName:<br>Full=Out<br>er<br>mitochon<br>drial<br>membran<br>e protein<br>porin 3 | 30,853.30 | 100.00% | 4 | 5 | 7  | 0.06% | 19.40% | VNNASLI 4.34<br>GLGYTQ<br>TLRPGV<br>K | 2,101.18 |
| ATP | 6018 | SLC25A gi 1515560<br>3 protein 64                                                                                                                                                                                                                              | 39,986.50 | 100.00% | 4 | 6 | 14 | 0.12% | 9.70%  | FGFYEV 2.02<br>FK                     | 1,036.51 |
| ATP | 6018 | SLC25A gi 1515560<br>3 protein 64                                                                                                                                                                                                                              | 39,986.50 | 100.00% | 4 | 6 | 14 | 0.12% | 9.70%  | IQTQPGY 3.9<br>ANTLR                  | 1,361.72 |
| ATP | 6018 | SLC25A gi 1515560<br>3 protein 64                                                                                                                                                                                                                              | 39,986.50 | 100.00% | 4 | 6 | 14 | 0.12% | 9.70%  | LPRPPPP 4.55<br>EMPESL<br>K           | 1,603.85 |
| ATP | 6018 | SLC25A gi 1515560<br>3 protein 64                                                                                                                                                                                                                              | 39,986.50 | 100.00% | 4 | 6 | 14 | 0.12% | 9.70%  | LPRPPPP 4.24<br>EMPESL<br>KK          | 1,731.95 |
| ATP | 6018 | ALCAM/ gi 1311130<br>CD166 4,gi 413867<br>84,gi 47605<br>539                                                                                                                                                                                                   | 64,749.10 | 100.00% | 3 | 4 | 4  | 0.03% | 4.63%  | KSVQYD 2.91<br>DVPEYK<br>DR           | 1,741.84 |
| ATP | 6018 | ALCAM/ gi 1311130<br>CD166 4,gi 413867<br>84,gi 47605<br>539                                                                                                                                                                                                   | 64,749.10 | 100.00% | 3 | 4 | 4  | 0.03% | 4.63%  | SVQYDD 2.56<br>VPEYKD<br>R            | 1,613.74 |
| ATP | 6018 | ALCAM/ gi 1311130<br>CD166 4,gi 413867<br>84,gi 47605<br>539                                                                                                                                                                                                   | 64,749.10 | 100.00% | 3 | 4 | 4  | 0.03% | 4.63%  | VFKQPS 2.71<br>KPEIVSK                | 1,486.86 |



|     |      |                                                                                                                                                                       |                                                                                                                |           |         |   |   |   |       |        |                                    |      |          |
|-----|------|-----------------------------------------------------------------------------------------------------------------------------------------------------------------------|----------------------------------------------------------------------------------------------------------------|-----------|---------|---|---|---|-------|--------|------------------------------------|------|----------|
| ATP | 6018 | Myxovirus<br>s<br>(influenza<br>virus)<br>resistance<br>1,<br>interferon-<br>inducible<br>protein<br>p78<br>(mouse)                                                   | gi 1096591<br>40,gi 27806<br>841,gi 2837<br>2116,gi 292<br>0652,gi 304<br>6232,gi 331<br>11880,gi 68<br>067472 | 74,789.50 | 99.90%  | 2 | 2 | 2 | 0.02% | 7.72%  | IEDIRLE<br>QENEAE<br>K             | 2.88 | 1,715.84 |
| ATP | 6018 | Myxovirus<br>s<br>(influenza<br>virus)<br>resistance<br>1,<br>interferon-<br>inducible<br>protein<br>p78<br>(mouse)                                                   | gi 1096591<br>40,gi 27806<br>841,gi 2837<br>2116,gi 292<br>0652,gi 304<br>6232,gi 331<br>11880,gi 68<br>067472 | 74,789.50 | 99.90%  | 2 | 2 | 2 | 0.02% | 7.72%  | QETINLV<br>VVPANV<br>DIATTEA<br>LR | 2.92 | 2,366.29 |
| ATP | 6018 | Myxovirus<br>s<br>(influenza<br>virus)<br>resistance<br>1,<br>interferon-<br>inducible<br>protein<br>p78<br>(mouse)                                                   | gi 1096591<br>40,gi 27806<br>841,gi 2837<br>2116,gi 292<br>0652,gi 304<br>6232,gi 331<br>11880,gi 68<br>067472 | 74,789.50 | 99.90%  | 2 | 2 | 2 | 0.02% | 7.72%  | SSVLEAL<br>SGVALP<br>R             | 4.63 | 1,398.80 |
| ATP | 6018 | RecName<br>:<br>Full=40S<br>ribosomal<br>protein<br>SA;<br>AltName:<br>Full=Lam<br>inin<br>receptor<br>I;<br>AltName:<br>Full=p40;<br>AltName:<br>Full=Protein<br>C10 | gi 1220660<br>07,gi 28189<br>773,gi 7358<br>7277                                                               | 18,591.70 | 100.00% | 4 | 4 | 4 | 0.03% | 35.70% | AIVAIEN<br>PADVSVI<br>SSR          | 3.72 | 1,740.95 |

|     |      |                                                                                                                                                |           |         |   |   |   |       |        |                                          |          |
|-----|------|------------------------------------------------------------------------------------------------------------------------------------------------|-----------|---------|---|---|---|-------|--------|------------------------------------------|----------|
| ATP | 6018 | RecName gi 1220660 : 07.gi 28189 Full=40S ribosomal protein SA; AltName: Full=Laminin receptor 1; AltName: Full=p40; AltName: Full=Protein C10 | 18,591.70 | 100.00% | 4 | 4 | 4 | 0.03% | 35.70% | FAAATG 4.82<br>ATPIAGR                   | 1,203.65 |
| ATP | 6018 | RecName gi 1220660 : 07.gi 28189 Full=40S ribosomal protein SA; AltName: Full=Laminin receptor 1; AltName: Full=p40; AltName: Full=Protein C10 | 18,591.70 | 100.00% | 4 | 4 | 4 | 0.03% | 35.70% | FLAAGT 4.73<br>HLGGTN<br>LDFQME<br>QYIYK | 2,633.27 |
| ATP | 6018 | RecName gi 1220660 : 07.gi 28189 Full=40S ribosomal protein SA; AltName: Full=Laminin receptor 1; AltName: Full=p40; AltName: Full=Protein C10 | 18,591.70 | 100.00% | 4 | 4 | 4 | 0.03% | 35.70% | LLVVTD 2.39<br>PR                        | 912.5514 |
| ATP | 6018 | alpha isoform of regulatory subunit A, protein phosphatase 2                                                                                   | 65,273.60 | 99.80%  | 2 | 2 | 2 | 0.02% | 5.43%  | SEIIPMFS 3.88<br>NLASDE<br>QDSVR         | 2,154.00 |

|     |      |                                                                                      |                                                                                                                    |           |         |   |   |    |       |        |                             |      |          |
|-----|------|--------------------------------------------------------------------------------------|--------------------------------------------------------------------------------------------------------------------|-----------|---------|---|---|----|-------|--------|-----------------------------|------|----------|
| ATP | 6018 | alpha isoform of regulatory subunit A, protein phosphatase 2                         | gi 146231714,gi 79153525,gi 82697383                                                                               | 65,273.60 | 99.80%  | 2 | 2 | 2  | 0.02% | 5.43%  | VLAMSG<br>DPNYLH<br>R       | 2.37 | 1,488.73 |
| ATP | 6018 | tyrosine monoxygenase/tryptophan 5-monoxygenase activation protein, zeta polypeptide | 3,gi 27807367,gi 4557908,gi 4557913,gi 4557914,gi 4557915,gi 4557916,gi 4930273,gi 4930274,gi 52000886,gi 73587275 | 27,727.90 | 100.00% | 5 | 7 | 12 | 0.10% | 31.80% | GIVDQS<br>QQAYQE<br>AFEISK  | 3.98 | 2,040.99 |
| ATP | 6018 | tyrosine monoxygenase/tryptophan 5-monoxygenase activation protein, zeta polypeptide | 3,gi 27807367,gi 4557908,gi 4557913,gi 4557914,gi 4557915,gi 4557916,gi 4930273,gi 4930274,gi 52000886,gi 73587275 | 27,727.90 | 100.00% | 5 | 7 | 12 | 0.10% | 31.80% | GIVDQS<br>QQAYQE<br>AFEISKK | 3.08 | 2,169.08 |
| ATP | 6018 | tyrosine monoxygenase/tryptophan 5-monoxygenase activation protein, zeta polypeptide | 3,gi 27807367,gi 4557908,gi 4557913,gi 4557914,gi 4557915,gi 4557916,gi 4930273,gi 4930274,gi 52000886,gi 73587275 | 27,727.90 | 100.00% | 5 | 7 | 12 | 0.10% | 31.80% | LAEQAE<br>RYDDM<br>AACMK    | 3.56 | 1,860.79 |
| ATP | 6018 | tyrosine monoxygenase/tryptophan 5-monoxygenase activation protein, zeta polypeptide | 3,gi 27807367,gi 4557908,gi 4557913,gi 4557914,gi 4557915,gi 4557916,gi 4930273,gi 4930274,gi 52000886,gi 73587275 | 27,727.90 | 100.00% | 5 | 7 | 12 | 0.10% | 31.80% | SVTEQG<br>AELSNE<br>ER      | 4.59 | 1,548.71 |

|     |      |                                                                                                                                                                                                                                                         |           |         |   |   |    |       |        |                                                    |          |
|-----|------|---------------------------------------------------------------------------------------------------------------------------------------------------------------------------------------------------------------------------------------------------------|-----------|---------|---|---|----|-------|--------|----------------------------------------------------|----------|
| ATP | 6018 | tyrosine 3-gi 2780736<br>monoxy 7-gi 455790<br>genase/tr 8-gi 455791<br>yptophan 3-gi 455791<br>5- 4-gi 455791<br>monoxy 5-gi 455791<br>genase 6-gi 493027<br>activation 3-gi 493027<br>protein, 4-gi 520008<br>zeta 86-gi 73587<br>polypepti 275<br>de | 27,727.90 | 100.00% | 5 | 7 | 12 | 0.10% | 31.80% | TAFDEAI 5.38<br>AELDTL<br>SEESYK<br>DSTLIM<br>QLLR | 3,318.63 |
| ATP | 6018 | PREDIC gi 1199199<br>TED: 84-gi 61553<br>similar to 181-gi 6246<br>ribosomal 0552-gi 716<br>protein 49267<br>L7                                                                                                                                         | 29,152.80 | 100.00% | 4 | 4 | 5  | 0.04% | 16.50% | IALTDNA 3.66<br>LIAR                               | 1,170.68 |
| ATP | 6018 | PREDIC gi 1199199<br>TED: 84-gi 61553<br>similar to 181-gi 6246<br>ribosomal 0552-gi 716<br>protein 49267<br>L7                                                                                                                                         | 29,152.80 | 100.00% | 4 | 4 | 5  | 0.04% | 16.50% | KVPAVP 2.51<br>ETLK                                | 1,081.66 |
| ATP | 6018 | PREDIC gi 1199199<br>TED: 84-gi 61553<br>similar to 181-gi 6246<br>ribosomal 0552-gi 716<br>protein 49267<br>L7                                                                                                                                         | 29,152.80 | 100.00% | 4 | 4 | 5  | 0.04% | 16.50% | KVPAVP 3.22<br>ETLKK                               | 1,209.76 |
| ATP | 6018 | PREDIC gi 1199199<br>TED: 84-gi 61553<br>similar to 181-gi 6246<br>ribosomal 0552-gi 716<br>protein 49267<br>L7                                                                                                                                         | 29,152.80 | 100.00% | 4 | 4 | 5  | 0.04% | 16.50% | TTHFVE 2.15<br>GGDAGN<br>REDQIN<br>R               | 2,115.98 |
| ATP | 6018 | 90-kDa gi 3439234<br>heat 3-gi 605927<br>shock 92-gi 75072<br>protein 500<br>alpha                                                                                                                                                                      | 84,716.20 | 100.00% | 5 | 5 | 7  | 0.06% | 13.20% | ADLINNL 2.59<br>GTIAK                              | 1,242.71 |
| ATP | 6018 | 90-kDa gi 3439234<br>heat 3-gi 605927<br>shock 92-gi 75072<br>protein 500<br>alpha                                                                                                                                                                      | 84,716.20 | 100.00% | 5 | 5 | 7  | 0.06% | 13.20% | ELISNSS 2.7<br>DALDK                               | 1,291.64 |
| ATP | 6018 | 90-kDa gi 3439234<br>heat 3-gi 605927<br>shock 92-gi 75072<br>protein 500<br>alpha                                                                                                                                                                      | 84,716.20 | 100.00% | 5 | 5 | 7  | 0.06% | 13.20% | ELISNSS 3.71<br>DALDKI<br>R                        | 1,560.82 |
| ATP | 6018 | 90-kDa gi 3439234<br>heat 3-gi 605927<br>shock 92-gi 75072<br>protein 500<br>alpha                                                                                                                                                                      | 84,716.20 | 100.00% | 5 | 5 | 7  | 0.06% | 13.20% | GVVDSE 4.63<br>DLPLNIS<br>R                        | 1,513.79 |
| ATP | 6018 | 90-kDa gi 3439234<br>heat 3-gi 605927<br>shock 92-gi 75072<br>protein 500<br>alpha                                                                                                                                                                      | 84,716.20 | 100.00% | 5 | 5 | 7  | 0.06% | 13.20% | HLEINPD 3.16<br>HSIIETL<br>R                       | 1,786.94 |
| ATP | 6018 | 90-kDa gi 3439234<br>heat 3-gi 605927<br>shock 92-gi 75072<br>protein 500<br>alpha                                                                                                                                                                      | 84,716.20 | 100.00% | 5 | 5 | 7  | 0.06% | 13.20% | NPDDITN 3.18<br>EEYGEF<br>YK                       | 1,833.78 |

|     |      |                                                                                                                         |                                                                                     |           |         |    |    |    |       |        |                                                  |          |
|-----|------|-------------------------------------------------------------------------------------------------------------------------|-------------------------------------------------------------------------------------|-----------|---------|----|----|----|-------|--------|--------------------------------------------------|----------|
| ATP | 6018 | 90-kDa<br>heat<br>shock<br>protein<br>alpha                                                                             | gi 3439234<br>3,gi 605927<br>92,gi 75072<br>500                                     | 84,716.20 | 100.00% | 5  | 5  | 7  | 0.06% | 13.20% | TLTIVDT 4.41<br>GIGMTK                           | 1,365.73 |
| ATP | 6018 | 90-kDa<br>heat<br>shock<br>protein<br>alpha                                                                             | gi 3439234<br>3,gi 605927<br>92,gi 75072<br>500                                     | 84,716.20 | 100.00% | 5  | 5  | 7  | 0.06% | 13.20% | YESLTD 4.17<br>PSKLDS<br>GK                      | 1,539.75 |
| ATP | 6018 | PREDIC<br>TED:<br>similar to<br>histone<br>cluster 1,<br>H2bd                                                           | gi 1199157<br>07,gi 11991<br>5717,gi 119<br>915727,gi 1<br>19936491,g<br>i 82697375 | 13,888.60 | 100.00% | 3  | 3  | 10 | 0.09% | 19.80% | AMGIMN 4.38<br>SFVNDIF<br>ER                     | 1,759.81 |
| ATP | 6018 | PREDIC<br>TED:<br>similar to<br>histone<br>cluster 1,<br>H2bd                                                           | gi 1199157<br>07,gi 11991<br>5717,gi 119<br>915727,gi 1<br>19936491,g<br>i 82697375 | 13,888.60 | 100.00% | 3  | 3  | 10 | 0.09% | 19.80% | ESYSVY 2.35<br>VYK                               | 1,137.55 |
| ATP | 6018 | PREDIC<br>TED:<br>similar to<br>histone<br>cluster 1,<br>H2bd                                                           | gi 1199157<br>07,gi 11991<br>5717,gi 119<br>915727,gi 1<br>19936491,g<br>i 82697375 | 13,888.60 | 100.00% | 3  | 3  | 10 | 0.09% | 19.80% | KESYSV 2.81<br>YVYK                              | 1,265.64 |
| ATP | 6018 | pyruvate<br>kinase 3                                                                                                    | gi 1462317<br>36,gi 19467<br>0470,gi 735<br>87283                                   | 61,410.20 | 100.00% | 6  | 6  | 7  | 0.06% | 18.60% | EATESFA 4.24<br>SDPLYR<br>PVAVAL<br>DTKGPEI<br>R | 3,045.59 |
| ATP | 6018 | pyruvate<br>kinase 3                                                                                                    | gi 1462317<br>36,gi 19467<br>0470,gi 735<br>87283                                   | 61,410.20 | 100.00% | 6  | 6  | 7  | 0.06% | 18.60% | GDLGIEI 3.44<br>PAEK                             | 1,141.61 |
| ATP | 6018 | pyruvate<br>kinase 3                                                                                                    | gi 1462317<br>36,gi 19467<br>0470,gi 735<br>87283                                   | 61,410.20 | 100.00% | 6  | 6  | 7  | 0.06% | 18.60% | IYVDDG 3.21<br>LISLLVK                           | 1,447.84 |
| ATP | 6018 | pyruvate<br>kinase 3                                                                                                    | gi 1462317<br>36,gi 19467<br>0470,gi 735<br>87283                                   | 61,410.20 | 100.00% | 6  | 6  | 7  | 0.06% | 18.60% | LDIDSPPI 3.07<br>TAR                             | 1,197.65 |
| ATP | 6018 | pyruvate<br>kinase 3                                                                                                    | gi 1462317<br>36,gi 19467<br>0470,gi 735<br>87283                                   | 61,410.20 | 100.00% | 6  | 6  | 7  | 0.06% | 18.60% | LSPITSD 3.82<br>PTEAAA<br>VGAVEA<br>SFK          | 2,161.10 |
| ATP | 6018 | pyruvate<br>kinase 3                                                                                                    | gi 1462317<br>36,gi 19467<br>0470,gi 735<br>87283                                   | 61,410.20 | 100.00% | 6  | 6  | 7  | 0.06% | 18.60% | QKGPDF 3.41<br>LVTEVE<br>NGGSLG<br>SK            | 2,062.05 |
| ATP | 6018 | guanine<br>nucleotid<br>e binding<br>protein<br>(G<br>protein),<br>alpha<br>inhibiting<br>activity<br>polypepti<br>de 2 | gi 1982821<br>35                                                                    | 40,460.10 | 100.00% | 10 | 13 | 30 | 0.26% | 33.20% | AMGNLQ 4.49<br>IDFADPS<br>R                      | 1,550.73 |

|     |      |                                                                                         |            |           |         |    |    |    |       |        |                                  |          |
|-----|------|-----------------------------------------------------------------------------------------|------------|-----------|---------|----|----|----|-------|--------|----------------------------------|----------|
| ATP | 6018 | guanine nucleotide binding protein (G protein), alpha inhibiting activity polypeptide 2 | gi 1982821 | 40,460.10 | 100.00% | 10 | 13 | 30 | 0.26% | 33.20% | AMGNLQ 3.27<br>IDFADPS<br>RADDAR | 2,078.96 |
| ATP | 6018 | guanine nucleotide binding protein (G protein), alpha inhibiting activity polypeptide 2 | gi 1982821 | 40,460.10 | 100.00% | 10 | 13 | 30 | 0.26% | 33.20% | AVVYSN 4.94<br>TIQSIMA<br>IVK    | 1,752.96 |
| ATP | 6018 | guanine nucleotide binding protein (G protein), alpha inhibiting activity polypeptide 2 | gi 1982821 | 40,460.10 | 100.00% | 10 | 13 | 30 | 0.26% | 33.20% | EYQLND 4.21<br>SAAYYL<br>NDLER   | 2,076.95 |
| ATP | 6018 | guanine nucleotide binding protein (G protein), alpha inhibiting activity polypeptide 2 | gi 1982821 | 40,460.10 | 100.00% | 10 | 13 | 30 | 0.26% | 33.20% | IAQSDYI 4.2<br>PTQQDV<br>LR      | 1,746.90 |
| ATP | 6018 | guanine nucleotide binding protein (G protein), alpha inhibiting activity polypeptide 2 | gi 1982821 | 40,460.10 | 100.00% | 10 | 13 | 30 | 0.26% | 33.20% | LLLLGA 3.63<br>GESGK             | 1,057.63 |
| ATP | 6018 | guanine nucleotide binding protein (G protein), alpha inhibiting activity polypeptide 2 | gi 1982821 | 40,460.10 | 100.00% | 10 | 13 | 30 | 0.26% | 33.20% | NVQFVF 2.93<br>DAVTDV<br>IHK     | 1,707.93 |

|     |      |                                                                                         |                                                   |           |         |    |    |    |       |        |                                                             |      |          |
|-----|------|-----------------------------------------------------------------------------------------|---------------------------------------------------|-----------|---------|----|----|----|-------|--------|-------------------------------------------------------------|------|----------|
| ATP | 6018 | guanine nucleotide binding protein (G protein), alpha inhibiting activity polypeptide 2 | gi 198282135                                      | 40,460.10 | 100.00% | 10 | 13 | 30 | 0.26% | 33.20% | SREYQL<br>NDSAAY<br>YLNDLE<br>R                             | 4.66 | 2,320.08 |
| ATP | 6018 | guanine nucleotide binding protein (G protein), alpha inhibiting activity polypeptide 2 | gi 198282135                                      | 40,460.10 | 100.00% | 10 | 13 | 30 | 0.26% | 33.20% | TTGIVET<br>HFTFK                                            | 3.35 | 1,380.72 |
| ATP | 6018 | guanine nucleotide binding protein (G protein), alpha inhibiting activity polypeptide 2 | gi 198282135                                      | 40,460.10 | 100.00% | 10 | 13 | 30 | 0.26% | 33.20% | YDEAAS<br>YIQSK                                             | 3.16 | 1,274.59 |
| ATP | 6018 | Paraoxonase 2                                                                           | gi 109939919,gi 61553203,gi 61888862,gi 71648804  | 39,404.60 | 100.00% | 4  | 6  | 8  | 0.07% | 14.70% | LFVYDP<br>K                                                 | 2.16 | 881.4768 |
| ATP | 6018 | Paraoxonase 2                                                                           | gi 109939919,gi 61553203,gi 61888862,gi 71648804  | 39,404.60 | 100.00% | 4  | 6  | 8  | 0.07% | 14.70% | LLIGTLY<br>HR                                               | 2.46 | 1,085.65 |
| ATP | 6018 | Paraoxonase 2                                                                           | gi 109939919,gi 61553203,gi 61888862,gi 71648804  | 39,404.60 | 100.00% | 4  | 6  | 8  | 0.07% | 14.70% | VVAEGF<br>DSANGI<br>NISPDKK                                 | 4.57 | 1,961.00 |
| ATP | 6018 | Paraoxonase 2                                                                           | gi 109939919,gi 61553203,gi 61888862,gi 71648804  | 39,404.60 | 100.00% | 4  | 6  | 8  | 0.07% | 14.70% | YIYVADI<br>LAHEIHV<br>LEK                                   | 1.97 | 2,026.10 |
| ATP | 6018 | RecName : Full=Ade nylyl cyclase-associate d protein 1; Short=C AP 1                    | gi 122056071,gi 152001126,gi 74267948,gi 78042488 | 51,254.80 | 100.00% | 3  | 4  | 4  | 0.03% | 16.10% | ELSGLPS<br>GPSAGS<br>GPPPPPP<br>GPPPPPV<br>PTSSGSD<br>DSASR | 4.53 | 3,586.73 |

|     |      |                                                                                                                                                   |                                                                   |           |         |   |   |   |       |        |                                                     |          |
|-----|------|---------------------------------------------------------------------------------------------------------------------------------------------------|-------------------------------------------------------------------|-----------|---------|---|---|---|-------|--------|-----------------------------------------------------|----------|
| ATP | 6018 | RecName<br>:<br>Full=Ade<br>nylyl<br>cyclase-<br>associate<br>d protein<br>1;<br>Short=C<br>AP 1                                                  | gi 1220560<br>71,gi 15200<br>1126,gi 742<br>67948,gi 78<br>042488 | 51,254.80 | 100.00% | 3 | 4 | 4 | 0.03% | 16.10% | LSDLLAP 3.43<br>ISEQIQE<br>VVVTR                    | 2,158.18 |
| ATP | 6018 | RecName<br>:<br>Full=Ade<br>nylyl<br>cyclase-<br>associate<br>d protein<br>1;<br>Short=C<br>AP 1                                                  | gi 1220560<br>71,gi 15200<br>1126,gi 742<br>67948,gi 78<br>042488 | 51,254.80 | 100.00% | 3 | 4 | 4 | 0.03% | 16.10% | SALFAQI 2.5<br>NQGESIT<br>HALK                      | 1,928.02 |
| ATP | 6018 | RecName<br>:<br>Full=Co<br>mplement<br>compon<br>ent 1 Q<br>subcomp<br>onent-<br>binding<br>protein,<br>mitochon<br>drial;<br>Flags:<br>Precursor | gi 1153117<br>84,gi 74354<br>078,gi 7773<br>6001                  | 30,588.80 | 99.80%  | 2 | 4 | 8 | 0.07% | 18.00% | AEEQEP 3.81<br>ELTSTPN<br>FVVEVT<br>K               | 2,247.10 |
| ATP | 6018 | RecName<br>:<br>Full=Co<br>mplement<br>compon<br>ent 1 Q<br>subcomp<br>onent-<br>binding<br>protein,<br>mitochon<br>drial;<br>Flags:<br>Precursor | gi 1153117<br>84,gi 74354<br>078,gi 7773<br>6001                  | 30,588.80 | 99.80%  | 2 | 4 | 8 | 0.07% | 18.00% | GVDNTF 5.71<br>ADELVE<br>LSTALE<br>HQEYISF<br>LEDLK | 3,425.66 |
| ATP | 6018 | plastin 3<br>16                                                                                                                                   | gi 1529411<br>16                                                  | 70,782.90 | 100.00% | 4 | 4 | 4 | 0.03% | 8.41%  | AYFHLL 3.63<br>NQIAPK                               | 1,414.78 |
| ATP | 6018 | plastin 3<br>16                                                                                                                                   | gi 1529411<br>16                                                  | 70,782.90 | 100.00% | 4 | 4 | 4 | 0.03% | 8.41%  | IDINMSG 3.16<br>FNETDD<br>LKR                       | 1,883.88 |
| ATP | 6018 | plastin 3<br>16                                                                                                                                   | gi 1529411<br>16                                                  | 70,782.90 | 100.00% | 4 | 4 | 4 | 0.03% | 8.41%  | LNLAFFV 3.76<br>ANLFNK                              | 1,363.77 |
| ATP | 6018 | plastin 3<br>16                                                                                                                                   | gi 1529411<br>16                                                  | 70,782.90 | 100.00% | 4 | 4 | 4 | 0.03% | 8.41%  | MINLSVP 4.21<br>DTIDER                              | 1,518.75 |
| ATP | 6018 | vascular<br>cell<br>adhesion<br>molecule-<br>1 7D<br>variant                                                                                      | gi 1190751<br>1,gi 119904<br>48,gi 41386<br>707                   | 81,381.40 | 99.80%  | 2 | 2 | 2 | 0.02% | 3.25%  | LPIDEME 2.55<br>FELK                                | 1,363.68 |



|     |      |                                                                                  |                                                  |           |         |   |   |   |       |        |                                                |      |          |
|-----|------|----------------------------------------------------------------------------------|--------------------------------------------------|-----------|---------|---|---|---|-------|--------|------------------------------------------------|------|----------|
| ATP | 6018 | vascular cell adhesion molecule-1 7D variant                                     | gi 11907511,gi 11990448,gi 41386707              | 81,381.40 | 99.80%  | 2 | 2 | 2 | 0.02% | 3.25%  | QSTQTL<br>YVNVAP<br>R                          | 2.89 | 1,476.78 |
| ATP | 6018 | ARF1 protein                                                                     | gi 146327384,gi 28603778,gi 59858233,gi 62751462 | 20,583.70 | 100.00% | 3 | 3 | 4 | 0.03% | 24.30% | ILMVGL<br>DAAGK                                | 3.55 | 1,103.61 |
| ATP | 6018 | ARF1 protein                                                                     | gi 146327384,gi 28603778,gi 59858233,gi 62751462 | 20,583.70 | 100.00% | 3 | 3 | 4 | 0.03% | 24.30% | MLAEDE<br>LRDAVL<br>LVFANK                     | 3.63 | 2,063.08 |
| ATP | 6018 | ARF1 protein                                                                     | gi 146327384,gi 28603778,gi 59858233,gi 62751462 | 20,583.70 | 100.00% | 3 | 3 | 4 | 0.03% | 24.30% | QDLPNA<br>MNAAEI<br>TDK                        | 2.94 | 1,646.77 |
| ATP | 6018 | H2A histone family, member X                                                     | gi 109659379,gi 119331192,gi 119889440           | 13,977.80 | 99.80%  | 2 | 3 | 4 | 0.03% | 23.10% | LLGGVTI<br>AQGGVL<br>PNIQAVL<br>LPK            | 4.74 | 2,271.38 |
| ATP | 6018 | H2A histone family, member X                                                     | gi 109659379,gi 119331192,gi 119889440           | 13,977.80 | 99.80%  | 2 | 3 | 4 | 0.03% | 23.10% | NDEELN<br>KLLGGV<br>TIAQGG<br>VLPNIQA<br>VLLPK | 5.75 | 3,113.76 |
| ATP | 6018 | RecName : Full=Ann exin A3; AltName: Full=Ann exin-3; AltName: Full=Ann exin III | gi 115299847,gi 74356332,gi 78369184             | 36,125.00 | 100.00% | 3 | 3 | 3 | 0.03% | 11.10% | GAGTDE<br>FTLNR                                | 3.1  | 1,180.56 |
| ATP | 6018 | RecName : Full=Ann exin A3; AltName: Full=Ann exin-3; AltName: Full=Ann exin III | gi 115299847,gi 74356332,gi 78369184             | 36,125.00 | 100.00% | 3 | 3 | 3 | 0.03% | 11.10% | SEIDLLD<br>IR                                  | 3.46 | 1,073.58 |
| ATP | 6018 | RecName : Full=Ann exin A3; AltName: Full=Ann exin-3; AltName: Full=Ann exin III | gi 115299847,gi 74356332,gi 78369184             | 36,125.00 | 100.00% | 3 | 3 | 3 | 0.03% | 11.10% | SLGDEIS<br>SETSGDF<br>RK                       | 3.68 | 1,727.81 |

|     |      |                                                                                           |            |           |         |   |    |    |       |        |                                            |      |          |
|-----|------|-------------------------------------------------------------------------------------------|------------|-----------|---------|---|----|----|-------|--------|--------------------------------------------|------|----------|
| ATP | 6018 | Catenin (cadherin-24,gi 11549 associate 7488,gi 122 d 145603,gi 1 protein), beta 1, 88kDa | gi 1113046 | 85,493.00 | 100.00% | 7 | 10 | 16 | 0.14% | 15.00% | GLNTIPL<br>FVQLLY<br>SPIENIQ<br>R          | 4.81 | 2,428.36 |
| ATP | 6018 | Catenin (cadherin-24,gi 11549 associate 7488,gi 122 d 145603,gi 1 protein), beta 1, 88kDa | gi 1113046 | 85,493.00 | 100.00% | 7 | 10 | 16 | 0.14% | 15.00% | LHYGLP<br>VVVK                             | 3.28 | 1,124.68 |
| ATP | 6018 | Catenin (cadherin-24,gi 11549 associate 7488,gi 122 d 145603,gi 1 protein), beta 1, 88kDa | gi 1113046 | 85,493.00 | 100.00% | 7 | 10 | 16 | 0.14% | 15.00% | LILASG<br>GPQALV<br>NIMR                   | 4.45 | 1,782.03 |
| ATP | 6018 | Catenin (cadherin-24,gi 11549 associate 7488,gi 122 d 145603,gi 1 protein), beta 1, 88kDa | gi 1113046 | 85,493.00 | 100.00% | 7 | 10 | 16 | 0.14% | 15.00% | LLNDED<br>QVVVVK                           | 3.97 | 1,385.73 |
| ATP | 6018 | Catenin (cadherin-24,gi 11549 associate 7488,gi 122 d 145603,gi 1 protein), beta 1, 88kDa | gi 1113046 | 85,493.00 | 100.00% | 7 | 10 | 16 | 0.14% | 15.00% | MLGSPV<br>DSVLFY<br>AITLHN<br>LLHQE<br>GAK | 4.16 | 3,083.62 |
| ATP | 6018 | Catenin (cadherin-24,gi 11549 associate 7488,gi 122 d 145603,gi 1 protein), beta 1, 88kDa | gi 1113046 | 85,493.00 | 100.00% | 7 | 10 | 16 | 0.14% | 15.00% | NEGVAT<br>YAAAVL<br>FR                     | 4.12 | 1,481.77 |
| ATP | 6018 | Catenin (cadherin-24,gi 11549 associate 7488,gi 122 d 145603,gi 1 protein), beta 1, 88kDa | gi 1113046 | 85,493.00 | 100.00% | 7 | 10 | 16 | 0.14% | 15.00% | TSMGGT<br>QQQFVE<br>GVR                    | 3.42 | 1,640.77 |
| ATP | 6018 | CDP-diacylglycerol synthase (phosphatidate cytidylyltransferase) 2                        | gi 1173065 | 51,340.60 | 100.00% | 2 | 2  | 3  | 0.03% | 7.87%  | SHLTDK<br>GMLTAA<br>TEDK                   | 3.21 | 1,733.84 |
| ATP | 6018 | CDP-diacylglycerol synthase (phosphatidate cytidylyltransferase) 2                        | gi 1173065 | 51,340.60 | 100.00% | 2 | 2  | 3  | 0.03% | 7.87%  | VAREPE<br>APPEDK<br>ESESEAK                | 3.98 | 2,097.99 |

|     |      |                                                                                             |                                          |            |         |    |    |    |       |       |                           |      |          |
|-----|------|---------------------------------------------------------------------------------------------|------------------------------------------|------------|---------|----|----|----|-------|-------|---------------------------|------|----------|
| ATP | 6018 | PREDICTED: similar to Inner nuclear membrane protein Man1 (LEM domain-containing protein 3) | gi 7661851                               | 100,104.80 | 99.80%  | 2  | 2  | 2  | 0.02% | 3.29% | RPAAPE<br>LQSPSG<br>R     | 2.87 | 1,365.72 |
| ATP | 6018 | PREDICTED: similar to Inner nuclear membrane protein Man1 (LEM domain-containing protein 3) | gi 7661851                               | 100,104.80 | 99.80%  | 2  | 2  | 2  | 0.02% | 3.29% | VLLGFSS<br>DESDVE<br>ASPR | 1.66 | 1,807.87 |
| ATP | 6018 | SET translocation (myeloid leukemia-associated)                                             | gi 1529411<br>92,gi 83638<br>675,gi 8437 | 32,099.40  | 99.80%  | 2  | 2  | 2  | 0.02% | 8.66% | IDFYFDE<br>NPYFEN<br>K    | 2.63 | 1,840.81 |
| ATP | 6018 | SET translocation (myeloid leukemia-associated)                                             | gi 1529411<br>92,gi 83638<br>675,gi 8437 | 32,099.40  | 99.80%  | 2  | 2  | 2  | 0.02% | 8.66% | VEVTEF<br>EDIK            | 2.92 | 1,208.60 |
| ATP | 6018 | PREDICTED: collagen, type XII, alpha 1 isoform 1                                            | gi 1946697                               | 351,243.80 | 100.00% | 19 | 19 | 21 | 0.18% | 9.72% | FNQMLN<br>QIPNDY<br>HSSR  | 3.6  | 1,979.90 |
| ATP | 6018 | PREDICTED: collagen, type XII, alpha 1 isoform 1                                            | gi 1946697                               | 351,243.80 | 100.00% | 19 | 19 | 21 | 0.18% | 9.72% | GEVQTV<br>TFDTDE<br>VK    | 3.69 | 1,567.75 |
| ATP | 6018 | PREDICTED: collagen, type XII, alpha 1 isoform 1                                            | gi 1946697                               | 351,243.80 | 100.00% | 19 | 19 | 21 | 0.18% | 9.72% | GGNTLT<br>GMALNF<br>IR    | 2.71 | 1,480.76 |
| ATP | 6018 | PREDICTED: collagen, type XII, alpha 1 isoform 1                                            | gi 1946697                               | 351,243.80 | 100.00% | 19 | 19 | 21 | 0.18% | 9.72% | GLTSSEP<br>VSIMEK         | 3.27 | 1,393.69 |
| ATP | 6018 | PREDICTED: collagen, type XII, alpha 1 isoform 1                                            | gi 1946697                               | 351,243.80 | 100.00% | 19 | 19 | 21 | 0.18% | 9.72% | GPGDLE<br>APSNLV<br>LSER  | 3.91 | 1,653.84 |

|     |      |                                                   |            |            |         |    |    |    |       |       |                                         |      |          |
|-----|------|---------------------------------------------------|------------|------------|---------|----|----|----|-------|-------|-----------------------------------------|------|----------|
| ATP | 6018 | PREDIC TED: collagen, type XII, alpha 1 isoform 1 | gi 1946697 | 351,243.80 | 100.00% | 19 | 19 | 21 | 0.18% | 9.72% | IYSPPTV<br>GDPIDEY<br>TTVPGR            | 3.13 | 2,193.11 |
| ATP | 6018 | PREDIC TED: collagen, type XII, alpha 1 isoform 1 | gi 1946697 | 351,243.80 | 100.00% | 19 | 19 | 21 | 0.18% | 9.72% | ITVDPTT<br>DGPTK                        | 2.7  | 1,244.64 |
| ATP | 6018 | PREDIC TED: collagen, type XII, alpha 1 isoform 1 | gi 1946697 | 351,243.80 | 100.00% | 19 | 19 | 21 | 0.18% | 9.72% | ITYQPST<br>GEGNEQ<br>TTTIGGR            | 5.12 | 2,110.01 |
| ATP | 6018 | PREDIC TED: collagen, type XII, alpha 1 isoform 1 | gi 1946697 | 351,243.80 | 100.00% | 19 | 19 | 21 | 0.18% | 9.72% | IVEVFEI<br>GPK                          | 2.89 | 1,130.65 |
| ATP | 6018 | PREDIC TED: collagen, type XII, alpha 1 isoform 1 | gi 1946697 | 351,243.80 | 100.00% | 19 | 19 | 21 | 0.18% | 9.72% | LFYAPT<br>AGGPEE<br>LVPIPGN<br>TNYAILR  | 4.61 | 2,773.46 |
| ATP | 6018 | PREDIC TED: collagen, type XII, alpha 1 isoform 1 | gi 1946697 | 351,243.80 | 100.00% | 19 | 19 | 21 | 0.18% | 9.72% | LKPDTP<br>YTITVSS<br>LYPDGE<br>GGR      | 3.4  | 2,366.19 |
| ATP | 6018 | PREDIC TED: collagen, type XII, alpha 1 isoform 1 | gi 1946697 | 351,243.80 | 100.00% | 19 | 19 | 21 | 0.18% | 9.72% | LQPQTT<br>YDITVLP<br>VYK                | 2.24 | 1,879.02 |
| ATP | 6018 | PREDIC TED: collagen, type XII, alpha 1 isoform 1 | gi 1946697 | 351,243.80 | 100.00% | 19 | 19 | 21 | 0.18% | 9.72% | NAFVNQ<br>PTVELH<br>PNGLPPS<br>YTHILLFR | 2.32 | 3,050.65 |
| ATP | 6018 | PREDIC TED: collagen, type XII, alpha 1 isoform 1 | gi 1946697 | 351,243.80 | 100.00% | 19 | 19 | 21 | 0.18% | 9.72% | NIGVEVF<br>SLGIK                        | 3.66 | 1,275.73 |
| ATP | 6018 | PREDIC TED: collagen, type XII, alpha 1 isoform 1 | gi 1946697 | 351,243.80 | 100.00% | 19 | 19 | 21 | 0.18% | 9.72% | NNVILQP<br>LQPDTP<br>YK                 | 3.75 | 1,739.93 |
| ATP | 6018 | PREDIC TED: collagen, type XII, alpha 1 isoform 1 | gi 1946697 | 351,243.80 | 100.00% | 19 | 19 | 21 | 0.18% | 9.72% | NVQVYN<br>PTPNSLD<br>VR                 | 3.81 | 1,715.87 |

|     |      |                                                                                   |                                     |            |         |    |    |    |       |        |                             |      |          |
|-----|------|-----------------------------------------------------------------------------------|-------------------------------------|------------|---------|----|----|----|-------|--------|-----------------------------|------|----------|
| ATP | 6018 | PREDICTED: collagen, type XII, alpha 1 isoform 1                                  | gi 194669778                        | 351,243.80 | 100.00% | 19 | 19 | 21 | 0.18% | 9.72%  | SLPADVI<br>HTVIENL<br>QPETK | 2.75 | 2,104.13 |
| ATP | 6018 | PREDICTED: collagen, type XII, alpha 1 isoform 1                                  | gi 194669778                        | 351,243.80 | 100.00% | 19 | 19 | 21 | 0.18% | 9.72%  | VEDIIEAI<br>NTFPYR          | 4.65 | 1,679.86 |
| ATP | 6018 | PREDICTED: collagen, type XII, alpha 1 isoform 1                                  | gi 194669778                        | 351,243.80 | 100.00% | 19 | 19 | 21 | 0.18% | 9.72%  | VQIALA<br>QYSGDP<br>R       | 3.78 | 1,417.74 |
| ATP | 6018 | V-ras simian leukemia viral oncogene homolog A (ras related)                      | gi 73586513,gi 77736231,gi 95768203 | 23,522.20  | 100.00% | 3  | 5  | 6  | 0.05% | 13.10% | ANVDKV<br>FFDLMR            | 4.05 | 1,470.74 |
| ATP | 6018 | V-ras simian leukemia viral oncogene homolog A (ras related)                      | gi 73586513,gi 77736231,gi 95768203 | 23,522.20  | 100.00% | 3  | 5  | 6  | 0.05% | 13.10% | VFFDLM<br>R                 | 2.1  | 943.4707 |
| ATP | 6018 | V-ras simian leukemia viral oncogene homolog A (ras related)                      | gi 73586513,gi 77736231,gi 95768203 | 23,522.20  | 100.00% | 3  | 5  | 6  | 0.05% | 13.10% | VKEDEN<br>VPFLLV<br>GNK     | 4.68 | 1,700.92 |
| ATP | 6018 | ALDOA protein                                                                     | gi 151554749,gi 156120479           | 39,418.80  | 99.80%  | 2  | 2  | 5  | 0.04% | 7.97%  | GILAADE<br>STGSIK           | 3.16 | 1,332.70 |
| ATP | 6018 | ALDOA protein                                                                     | gi 151554749,gi 156120479           | 39,418.80  | 99.80%  | 2  | 2  | 5  | 0.04% | 7.97%  | RLQSIGT<br>ENTEEN<br>RR     | 3.37 | 1,802.91 |
| ATP | 6018 | Small inducible cytokine subfamily E, member 1 (endothelial monocyte-activating ) | gi 86821409,gi 87080799             | 35,394.40  | 99.80%  | 2  | 2  | 2  | 0.02% | 5.59%  | KQQPVA<br>GSADSK<br>PVDVSR  | 3.81 | 1,868.98 |

|     |      |                                                                                   |                                          |           |        |   |   |   |       |        |                                         |          |
|-----|------|-----------------------------------------------------------------------------------|------------------------------------------|-----------|--------|---|---|---|-------|--------|-----------------------------------------|----------|
| ATP | 6018 | Small inducible cytokine subfamily E, member 1 (endothelial monocyte-activating ) | gi 86821409,gi 87080799                  | 35,394.40 | 99.80% | 2 | 2 | 2 | 0.02% | 5.59%  | QQPVAG 2.73<br>SADSKP<br>VDVSR          | 1,740.89 |
| ATP | 6018 | NADH dehydrogenase (ubiquinone) 39 kDa subunit                                    | gi 230,gi 28603782,gi 464254,gi 74267974 | 37,737.50 | 99.80% | 2 | 2 | 2 | 0.02% | 10.60% | LLQYAD 3.23<br>ALEHLLS<br>TGQGVV<br>LER | 2,425.31 |
| ATP | 6018 | NADH dehydrogenase (ubiquinone) 39 kDa subunit                                    | gi 230,gi 28603782,gi 464254,gi 74267974 | 37,737.50 | 99.80% | 2 | 2 | 2 | 0.02% | 10.60% | LQYGPL 3.42<br>AYILGEEK                 | 1,464.81 |
| ATP | 6018 | PREDICTED: similar to small GTP binding protein RAB23                             | gi 194677545                             | 37,951.40 | 99.80% | 2 | 4 | 7 | 0.06% | 9.91%  | LKQQIAE 3.54<br>NPESMH<br>SSSNK         | 2,043.98 |
| ATP | 6018 | PREDICTED: similar to small GTP binding protein RAB23                             | gi 194677545                             | 37,951.40 | 99.80% | 2 | 4 | 7 | 0.06% | 9.91%  | VVAEVG 3.83<br>DIPTALV<br>QNK           | 1,652.92 |
| ATP | 6018 | RecName: Full=Transmembrane domain-containing protein 1; Flags: Precursor         | gi 114152289,gi 83638714,gi 84370158     | 25,119.90 | 99.80% | 2 | 3 | 5 | 0.04% | 11.50% | KADGVH 4.54<br>TVEPTE<br>AGDYK          | 1,816.87 |
| ATP | 6018 | RecName: Full=Transmembrane domain-containing protein 1; Flags: Precursor         | gi 114152289,gi 83638714,gi 84370158     | 25,119.90 | 99.80% | 2 | 3 | 5 | 0.04% | 11.50% | SIQVLT 2.74<br>LR                       | 1,042.66 |

|     |      |                                                                             |                                                 |           |         |    |    |    |       |        |                                                             |          |
|-----|------|-----------------------------------------------------------------------------|-------------------------------------------------|-----------|---------|----|----|----|-------|--------|-------------------------------------------------------------|----------|
| ATP | 6018 | PREDICTED:<br>similar to heterogenous nuclear ribonucleoprotein L isoform 1 | gi 76641417                                     | 64,057.80 | 99.80%  | 2  | 3  | 3  | 0.03% | 10.70% | GLIDGV 4.35<br>VEADLV<br>EALQEF<br>GPISYVV<br>VMPK          | 3,103.63 |
| ATP | 6018 | PREDICTED:<br>similar to heterogenous nuclear ribonucleoprotein L isoform 1 | gi 76641417                                     | 64,057.80 | 99.80%  | 2  | 3  | 3  | 0.03% | 10.70% | TDNAGD 2.38<br>QHGGGG<br>GGGGGA<br>GAAGGG<br>GGENYD<br>DPHK | 2,924.18 |
| ATP | 6018 | NADH:ubiquinone oxidoreductase ASHI subunit [Homo sapiens]                  | gi 33150722                                     | 21,747.60 | 99.80%  | 2  | 2  | 2  | 0.02% | 16.10% | QYPYNN 2.15<br>LYLER                                        | 1,472.72 |
| ATP | 6018 | NADH:ubiquinone oxidoreductase ASHI subunit [Homo sapiens]                  | gi 33150722                                     | 21,747.60 | 99.80%  | 2  | 2  | 2  | 0.02% | 16.10% | VEDYEP 2.9<br>YPDDGM<br>GYGDYP<br>K                         | 2,225.89 |
| ATP | 6018 | proteasome activator subunit 2                                              | gi 59858279,gi 62460470,gi 73921837,gi 74267960 | 27,362.30 | 99.80%  | 2  | 3  | 3  | 0.03% | 14.20% | IYLNQL 5.08<br>LQEDSF<br>NVTDLN<br>SLR                      | 2,608.36 |
| ATP | 6018 | proteasome activator subunit 2                                              | gi 59858279,gi 62460470,gi 73921837,gi 74267960 | 27,362.30 | 99.80%  | 2  | 3  | 3  | 0.03% | 14.20% | TKVEAF 3.05<br>QTTISK                                       | 1,352.74 |
| ATP | 6018 | polymerase I and transcript release factor isoform 2                        | gi 162287374                                    | 43,446.30 | 100.00% | 10 | 12 | 23 | 0.20% | 26.90% | IIGAVDQ 5.7<br>IQLTQA<br>QLEER                              | 2,025.10 |
| ATP | 6018 | polymerase I and transcript release factor isoform 2                        | gi 162287374                                    | 43,446.30 | 100.00% | 10 | 12 | 23 | 0.20% | 26.90% | IREGQVE 3.76<br>VLK                                         | 1,170.68 |
| ATP | 6018 | polymerase I and transcript release factor isoform 2                        | gi 162287374                                    | 43,446.30 | 100.00% | 10 | 12 | 23 | 0.20% | 26.90% | KLEVNE 4.1<br>AELLR                                         | 1,313.74 |

|     |      |                                                      |                                                                                              |           |         |    |    |    |       |        |                                                       |      |          |
|-----|------|------------------------------------------------------|----------------------------------------------------------------------------------------------|-----------|---------|----|----|----|-------|--------|-------------------------------------------------------|------|----------|
| ATP | 6018 | polymerase I and transcript release factor isoform 2 | gi 162287374                                                                                 | 43,446.30 | 100.00% | 10 | 12 | 23 | 0.20% | 26.90% | KSFTPD<br>HVVYAR                                      | 2.67 | 1,419.74 |
| ATP | 6018 | polymerase I and transcript release factor isoform 2 | gi 162287374                                                                                 | 43,446.30 | 100.00% | 10 | 12 | 23 | 0.20% | 26.90% | QAEMEG<br>AVQSIQ<br>GELSK                             | 4.72 | 1,820.87 |
| ATP | 6018 | polymerase I and transcript release factor isoform 2 | gi 162287374                                                                                 | 43,446.30 | 100.00% | 10 | 12 | 23 | 0.20% | 26.90% | SDQVNG<br>VLVLSLL<br>DK                               | 3.81 | 1,599.90 |
| ATP | 6018 | polymerase I and transcript release factor isoform 2 | gi 162287374                                                                                 | 43,446.30 | 100.00% | 10 | 12 | 23 | 0.20% | 26.90% | SDQVNG<br>VLVLSLL<br>DKIIGAV<br>DQIQLT<br>QAQLEE<br>R | 3.89 | 3,605.98 |
| ATP | 6018 | polymerase I and transcript release factor isoform 2 | gi 162287374                                                                                 | 43,446.30 | 100.00% | 10 | 12 | 23 | 0.20% | 26.90% | SFTPDH<br>VVYAR                                       | 3.1  | 1,291.64 |
| ATP | 6018 | polymerase I and transcript release factor isoform 2 | gi 162287374                                                                                 | 43,446.30 | 100.00% | 10 | 12 | 23 | 0.20% | 26.90% | VMIYQD<br>EVKLPA<br>K                                 | 4.04 | 1,549.83 |
| ATP | 6018 | polymerase I and transcript release factor isoform 2 | gi 162287374                                                                                 | 43,446.30 | 100.00% | 10 | 12 | 23 | 0.20% | 26.90% | VPPFTFH<br>VK                                         | 2.32 | 1,071.60 |
| ATP | 6018 | unnamed protein product                              | gi 110292444,gi 1351907,gi 148744077,gi 162648,gi 2190337,gi 23307791,gi 30794280,gi 3336842 | 69,296.20 | 100.00% | 5  | 5  | 9  | 0.08% | 9.72%  | DAFLGS<br>FLYEYS<br>R                                 | 3.32 | 1,567.74 |
| ATP | 6018 | unnamed protein product                              | gi 110292444,gi 1351907,gi 148744077,gi 162648,gi 2190337,gi 23307791,gi 30794280,gi 3336842 | 69,296.20 | 100.00% | 5  | 5  | 9  | 0.08% | 9.72%  | FKDLGE<br>EHFK                                        | 4.15 | 1,249.62 |



|     |      |                                         |                                                                                              |           |         |   |   |    |       |        |                              |      |          |
|-----|------|-----------------------------------------|----------------------------------------------------------------------------------------------|-----------|---------|---|---|----|-------|--------|------------------------------|------|----------|
| ATP | 6018 | unnamed protein product                 | gi 110292444,gi 1351907,gi 148744077,gi 162648,gi 2190337,gi 23307791,gi 30794280,gi 3336842 | 69,296.20 | 100.00% | 5 | 5 | 9  | 0.08% | 9.72%  | HLVDEP<br>QNLIK              | 2.84 | 1,305.72 |
| ATP | 6018 | unnamed protein product                 | gi 110292444,gi 1351907,gi 148744077,gi 162648,gi 2190337,gi 23307791,gi 30794280,gi 3336842 | 69,296.20 | 100.00% | 5 | 5 | 9  | 0.08% | 9.72%  | KVPQVS<br>TPTLVE<br>VSR      | 4.41 | 1,639.94 |
| ATP | 6018 | unnamed protein product                 | gi 110292444,gi 1351907,gi 148744077,gi 162648,gi 2190337,gi 23307791,gi 30794280,gi 3336842 | 69,296.20 | 100.00% | 5 | 5 | 9  | 0.08% | 9.72%  | LVNELT<br>EFAK               | 3.6  | 1,163.63 |
| ATP | 6018 | RNA binding motif (RNP1, RRM) protein 3 | gi 73587236,gi 77735675                                                                      | 9,735.50  | 100.00% | 3 | 3 | 3  | 0.03% | 55.60% | ALEDHF<br>SSFGPIS<br>EVLVVVK | 3.36 | 2,060.07 |
| ATP | 6018 | RNA binding motif (RNP1, RRM) protein 3 | gi 73587236,gi 77735675                                                                      | 9,735.50  | 100.00% | 3 | 3 | 3  | 0.03% | 55.60% | GFGFITF<br>TNPEHA<br>SNAMR   | 3.74 | 2,012.93 |
| ATP | 6018 | RNA binding motif (RNP1, RRM) protein 3 | gi 73587236,gi 77735675                                                                      | 9,735.50  | 100.00% | 3 | 3 | 3  | 0.03% | 55.60% | LFVGGGL<br>NFNTDE<br>R       | 3.44 | 1,481.74 |
| ATP | 6018 | B-cell receptor-associated protein 31   | gi 59858303,gi 62460574,gi 74354925                                                          | 27,884.40 | 100.00% | 3 | 6 | 12 | 0.10% | 16.70% | KYMEEN<br>DLLKK              | 4.34 | 1,426.72 |
| ATP | 6018 | B-cell receptor-associated protein 31   | gi 59858303,gi 62460574,gi 74354925                                                          | 27,884.40 | 100.00% | 3 | 6 | 12 | 0.10% | 16.70% | LQAAVD<br>GPSDKK<br>EE       | 3.18 | 1,486.74 |
| ATP | 6018 | B-cell receptor-associated protein 31   | gi 59858303,gi 62460574,gi 74354925                                                          | 27,884.40 | 100.00% | 3 | 6 | 12 | 0.10% | 16.70% | VNLQNN<br>PGAVEH<br>FHMK     | 4.24 | 1,850.90 |
| ATP | 6018 | ITGA3 protein                           | gi 151556279,gi 156120449                                                                    | 45,035.90 | 99.80%  | 2 | 2 | 2  | 0.02% | 6.34%  | EAGNPG<br>SLFGYS<br>VALHR    | 2.77 | 1,774.89 |
| ATP | 6018 | ITGA3 protein                           | gi 151556279,gi 156120449                                                                    | 45,035.90 | 99.80%  | 2 | 2 | 2  | 0.02% | 6.34%  | YLLLAG<br>APR                | 2.94 | 973.583  |

|     |      |                                       |                                                   |           |         |    |    |    |       |        |                                                  |          |
|-----|------|---------------------------------------|---------------------------------------------------|-----------|---------|----|----|----|-------|--------|--------------------------------------------------|----------|
| ATP | 6018 | RecName<br>:<br>Full=Pro<br>hibitin-2 | gi 1098928<br>20,gi 11405<br>1223,gi 875<br>78149 | 33,340.80 | 100.00% | 13 | 15 | 41 | 0.35% | 54.20% | AKDFSLLI 3.53<br>LDDVAI<br>TELSFSR               | 2,240.18 |
| ATP | 6018 | RecName<br>:<br>Full=Pro<br>hibitin-2 | gi 1098928<br>20,gi 11405<br>1223,gi 875<br>78149 | 33,340.80 | 100.00% | 13 | 15 | 41 | 0.35% | 54.20% | AQVSLLI 2.35<br>R                                | 899.5673 |
| ATP | 6018 | RecName<br>:<br>Full=Pro<br>hibitin-2 | gi 1098928<br>20,gi 11405<br>1223,gi 875<br>78149 | 33,340.80 | 100.00% | 13 | 15 | 41 | 0.35% | 54.20% | DLQMVN 3.6<br>ISLR                               | 1,204.64 |
| ATP | 6018 | RecName<br>:<br>Full=Pro<br>hibitin-2 | gi 1098928<br>20,gi 11405<br>1223,gi 875<br>78149 | 33,340.80 | 100.00% | 13 | 15 | 41 | 0.35% | 54.20% | ESVFTV 2.82<br>EGGHR                             | 1,217.59 |
| ATP | 6018 | RecName<br>:<br>Full=Pro<br>hibitin-2 | gi 1098928<br>20,gi 11405<br>1223,gi 875<br>78149 | 33,340.80 | 100.00% | 13 | 15 | 41 | 0.35% | 54.20% | FNASQLI 4.13<br>TQR                              | 1,177.63 |
| ATP | 6018 | RecName<br>:<br>Full=Pro<br>hibitin-2 | gi 1098928<br>20,gi 11405<br>1223,gi 875<br>78149 | 33,340.80 | 100.00% | 13 | 15 | 41 | 0.35% | 54.20% | IGGVQQ 4.7<br>DTILAEQ<br>LHFR                    | 1,853.99 |
| ATP | 6018 | RecName<br>:<br>Full=Pro<br>hibitin-2 | gi 1098928<br>20,gi 11405<br>1223,gi 875<br>78149 | 33,340.80 | 100.00% | 13 | 15 | 41 | 0.35% | 54.20% | IPWFQYP 3.84<br>IYDIR                            | 1,723.92 |
| ATP | 6018 | RecName<br>:<br>Full=Pro<br>hibitin-2 | gi 1098928<br>20,gi 11405<br>1223,gi 875<br>78149 | 33,340.80 | 100.00% | 13 | 15 | 41 | 0.35% | 54.20% | IVQAEG 3.95<br>EAEAAR                            | 1,243.63 |
| ATP | 6018 | RecName<br>:<br>Full=Pro<br>hibitin-2 | gi 1098928<br>20,gi 11405<br>1223,gi 875<br>78149 | 33,340.80 | 100.00% | 13 | 15 | 41 | 0.35% | 54.20% | IYLTAD 6.07<br>NLVLNL<br>QDESFT<br>R             | 2,225.15 |
| ATP | 6018 | RecName<br>:<br>Full=Pro<br>hibitin-2 | gi 1098928<br>20,gi 11405<br>1223,gi 875<br>78149 | 33,340.80 | 100.00% | 13 | 15 | 41 | 0.35% | 54.20% | LLLGAG 4.84<br>AVAYGI<br>R                       | 1,273.76 |
| ATP | 6018 | RecName<br>:<br>Full=Pro<br>hibitin-2 | gi 1098928<br>20,gi 11405<br>1223,gi 875<br>78149 | 33,340.80 | 100.00% | 13 | 15 | 41 | 0.35% | 54.20% | QKIVQA 4.23<br>EGEAEA<br>AR                      | 1,499.78 |
| ATP | 6018 | RecName<br>:<br>Full=Pro<br>hibitin-2 | gi 1098928<br>20,gi 11405<br>1223,gi 875<br>78149 | 33,340.80 | 100.00% | 13 | 15 | 41 | 0.35% | 54.20% | VLPSIVN 2.77<br>EVLK                             | 1,210.74 |
| ATP | 6018 | RecName<br>:<br>Full=Pro<br>hibitin-2 | gi 1098928<br>20,gi 11405<br>1223,gi 875<br>78149 | 33,340.80 | 100.00% | 13 | 15 | 41 | 0.35% | 54.20% | VLSRPN 3.29<br>AMELPS<br>MYQR                    | 1,907.95 |
| ATP | 6018 | TAP1<br>protein                       | gi 1515570<br>07                                  | 81,933.30 | 100.00% | 6  | 7  | 10 | 0.09% | 10.90% | GVVGAA 2.84<br>LGFR                              | 946.5469 |
| ATP | 6018 | TAP1<br>protein                       | gi 1515570<br>07                                  | 81,933.30 | 100.00% | 6  | 7  | 10 | 0.09% | 10.90% | IFEYLDR 2.2                                      | 955.4884 |
| ATP | 6018 | TAP1<br>protein                       | gi 1515570<br>07                                  | 81,933.30 | 100.00% | 6  | 7  | 10 | 0.09% | 10.90% | QVAAVG 4.52<br>QEPLFLG<br>R                      | 1,484.82 |
| ATP | 6018 | TAP1<br>protein                       | gi 1515570<br>07                                  | 81,933.30 | 100.00% | 6  | 7  | 10 | 0.09% | 10.90% | SSQVAIE 3.31<br>VLSAMP<br>TVR                    | 1,703.90 |
| ATP | 6018 | TAP1<br>protein                       | gi 1515570<br>07                                  | 81,933.30 | 100.00% | 6  | 7  | 10 | 0.09% | 10.90% | STVAAL 5.51<br>LQNLQY<br>PTEGQV<br>LLDGEP<br>LPK | 2,894.55 |
| ATP | 6018 | TAP1<br>protein                       | gi 1515570<br>07                                  | 81,933.30 | 100.00% | 6  | 7  | 10 | 0.09% | 10.90% | SVLFITQ 2.41<br>R                                | 963.5622 |

|     |      |                                   |                                                                                                           |           |        |   |   |   |       |       |                                    |      |          |
|-----|------|-----------------------------------|-----------------------------------------------------------------------------------------------------------|-----------|--------|---|---|---|-------|-------|------------------------------------|------|----------|
| ATP | 6018 | ribosomal protein L3              | gi 1092507, gi 1544261, 64,gi 27807, 287,gi 4504, 99,gi 59858, 389,gi 7159, 574,gi 7305, 64,gi 74267, 942 | 46,006.40 | 99.80% | 2 | 2 | 2 | 0.02% | 9.43% | DDSSKP<br>VHLTAF<br>LGYK           | 4.31 | 1,777.91 |
| ATP | 6018 | ribosomal protein L3              | gi 1092507, gi 1544261, 64,gi 27807, 287,gi 4504, 99,gi 59858, 389,gi 7159, 574,gi 7305, 64,gi 74267, 942 | 46,006.40 | 99.80% | 2 | 2 | 2 | 0.02% | 9.43% | SINPLGG<br>FVHYGE<br>VTNDFV<br>MLK | 3.42 | 2,453.22 |
| ATP | 6018 | PREDIC TED: similar to keratin 6A | gi 1946873, 33,gi 61870, 938,gi 7661, 7862,gi 766, 17868,gi 76, 689949                                    | 60,808.20 | 99.80% | 2 | 2 | 4 | 0.03% | 8.06% | FASFIDK<br>VR                      | 1.87 | 1,082.60 |
| ATP | 6018 | PREDIC TED: similar to keratin 6A | gi 1946873, 33,gi 61870, 938,gi 7661, 7862,gi 766, 17868,gi 76, 689949                                    | 60,808.20 | 99.80% | 2 | 2 | 4 | 0.03% | 8.06% | NKYEDE<br>INKR                     | 3.05 | 1,308.65 |
| ATP | 6018 | PREDIC TED: similar to keratin 6A | gi 1946873, 33,gi 61870, 938,gi 7661, 7862,gi 766, 17868,gi 76, 689949                                    | 60,808.20 | 99.80% | 2 | 2 | 4 | 0.03% | 8.06% | NLDLDSI<br>IAEVK                   | 4.83 | 1,329.73 |
| ATP | 6018 | PREDIC TED: similar to keratin 6A | gi 1946873, 33,gi 61870, 938,gi 7661, 7862,gi 766, 17868,gi 76, 689949                                    | 60,808.20 | 99.80% | 2 | 2 | 4 | 0.03% | 8.06% | QNLEPLF<br>EQYINN<br>LR            | 2.36 | 1,890.97 |

|     |      |                                                                                                                                                                                                                                                                                                                                                           |           |         |   |    |    |       |        |                                  |          |
|-----|------|-----------------------------------------------------------------------------------------------------------------------------------------------------------------------------------------------------------------------------------------------------------------------------------------------------------------------------------------------------------|-----------|---------|---|----|----|-------|--------|----------------------------------|----------|
| ATP | 6018 | RecName gi 113948,g<br>: i 162779,g <br>Full=Ann 27807289,g<br>exin A2; i 59858385,<br>AltName: gi 7358698<br>Full=Ann 2<br>exin-2;<br>AltName:<br>Full=Ann<br>exin II;<br>AltName:<br>Full=Lip<br>ocortin<br>II;<br>AltName:<br>Full=Cal<br>pactin I<br>heavy<br>chain;<br>AltName:<br>Full=Chr<br>omobindi<br>n-8;<br>AltName:<br>Full=p36;<br>AltName: | 38,523.90 | 100.00% | 8 | 12 | 13 | 0.11% | 36.60% | AYTNFD 5.11<br>AERDAL<br>NIETAIK | 2,155.07 |
| ATP | 6018 | RecName gi 113948,g<br>: i 162779,g <br>Full=Ann 27807289,g<br>exin A2; i 59858385,<br>AltName: gi 7358698<br>Full=Ann 2<br>exin-2;<br>AltName:<br>Full=Ann<br>exin II;<br>AltName:<br>Full=Lip<br>ocortin<br>II;<br>AltName:<br>Full=Cal<br>pactin I<br>heavy<br>chain;<br>AltName:<br>Full=Chr<br>omobindi<br>n-8;<br>AltName:<br>Full=p36;<br>AltName: | 38,523.90 | 100.00% | 8 | 12 | 13 | 0.11% | 36.60% | GVDEVT 4.59<br>IVNLTN<br>R       | 1,542.85 |

|     |      |                                                                                                                                                                                                                                                                                                                                                           |           |         |   |    |    |       |        |                                 |          |
|-----|------|-----------------------------------------------------------------------------------------------------------------------------------------------------------------------------------------------------------------------------------------------------------------------------------------------------------------------------------------------------------|-----------|---------|---|----|----|-------|--------|---------------------------------|----------|
| ATP | 6018 | RecName gi 113948,g<br>: i 162779,g <br>Full=Ann 27807289,g<br>exin A2; i 59858385,<br>AltName: gi 7358698<br>Full=Ann 2<br>exin-2;<br>AltName:<br>Full=Ann<br>exin II;<br>AltName:<br>Full=Lip<br>ocortin<br>II;<br>AltName:<br>Full=Cal<br>pactin I<br>heavy<br>chain;<br>AltName:<br>Full=Chr<br>omobindi<br>n-8;<br>AltName:<br>Full=p36;<br>AltName: | 38,523.90 | 100.00% | 8 | 12 | 13 | 0.11% | 36.60% | LSLEGD 4.97<br>HSTPPSA<br>YGSVK | 1,844.90 |
| ATP | 6018 | RecName gi 113948,g<br>: i 162779,g <br>Full=Ann 27807289,g<br>exin A2; i 59858385,<br>AltName: gi 7358698<br>Full=Ann 2<br>exin-2;<br>AltName:<br>Full=Ann<br>exin II;<br>AltName:<br>Full=Lip<br>ocortin<br>II;<br>AltName:<br>Full=Cal<br>pactin I<br>heavy<br>chain;<br>AltName:<br>Full=Chr<br>omobindi<br>n-8;<br>AltName:<br>Full=p36;<br>AltName: | 38,523.90 | 100.00% | 8 | 12 | 13 | 0.11% | 36.60% | QDIAFA 2.85<br>YQR              | 1,111.55 |

|     |      |                                                                                                                                                                                                                                                                                                                                                           |           |         |   |    |    |       |        |                            |      |          |
|-----|------|-----------------------------------------------------------------------------------------------------------------------------------------------------------------------------------------------------------------------------------------------------------------------------------------------------------------------------------------------------------|-----------|---------|---|----|----|-------|--------|----------------------------|------|----------|
| ATP | 6018 | RecName gi 113948,g<br>: i 162779,g <br>Full=Ann 27807289,g<br>exin A2; i 59858385,<br>AltName: gi 7358698<br>Full=Ann 2<br>exin-2;<br>AltName:<br>Full=Ann<br>exin II;<br>AltName:<br>Full=Lip<br>ocortin<br>II;<br>AltName:<br>Full=Cal<br>pactin I<br>heavy<br>chain;<br>AltName:<br>Full=Chr<br>omobindi<br>n-8;<br>AltName:<br>Full=p36;<br>AltName: | 38,523.90 | 100.00% | 8 | 12 | 13 | 0.11% | 36.60% | RAEDGS<br>VIDYELI<br>DQDAR | 4.45 | 2,064.98 |
| ATP | 6018 | RecName gi 113948,g<br>: i 162779,g <br>Full=Ann 27807289,g<br>exin A2; i 59858385,<br>AltName: gi 7358698<br>Full=Ann 2<br>exin-2;<br>AltName:<br>Full=Ann<br>exin II;<br>AltName:<br>Full=Lip<br>ocortin<br>II;<br>AltName:<br>Full=Cal<br>pactin I<br>heavy<br>chain;<br>AltName:<br>Full=Chr<br>omobindi<br>n-8;<br>AltName:<br>Full=p36;<br>AltName: | 38,523.90 | 100.00% | 8 | 12 | 13 | 0.11% | 36.60% | SALSGH<br>LETVILG<br>LLK   | 4.42 | 1,650.98 |

|     |      |                                                                                                                                                                                                                                                                                                                                                           |           |         |   |    |    |       |        |                                |          |
|-----|------|-----------------------------------------------------------------------------------------------------------------------------------------------------------------------------------------------------------------------------------------------------------------------------------------------------------------------------------------------------------|-----------|---------|---|----|----|-------|--------|--------------------------------|----------|
| ATP | 6018 | RecName gi 113948,g<br>: i 162779,g <br>Full=Ann 27807289,g<br>exin A2; i 59858385,<br>AltName: gi 7358698<br>Full=Ann 2<br>exin-2;<br>AltName:<br>Full=Ann<br>exin II;<br>AltName:<br>Full=Lip<br>ocortin<br>II;<br>AltName:<br>Full=Cal<br>pactin I<br>heavy<br>chain;<br>AltName:<br>Full=Chr<br>omobindi<br>n-8;<br>AltName:<br>Full=p36;<br>AltName: | 38,523.90 | 100.00% | 8 | 12 | 13 | 0.11% | 36.60% | SYSPYD 2.7<br>MLESIK<br>K      | 1,576.76 |
| ATP | 6018 | RecName gi 113948,g<br>: i 162779,g <br>Full=Ann 27807289,g<br>exin A2; i 59858385,<br>AltName: gi 7358698<br>Full=Ann 2<br>exin-2;<br>AltName:<br>Full=Ann<br>exin II;<br>AltName:<br>Full=Lip<br>ocortin<br>II;<br>AltName:<br>Full=Cal<br>pactin I<br>heavy<br>chain;<br>AltName:<br>Full=Chr<br>omobindi<br>n-8;<br>AltName:<br>Full=p36;<br>AltName: | 38,523.90 | 100.00% | 8 | 12 | 13 | 0.11% | 36.60% | TDLEKDI 5.57<br>VSDTSG<br>DFRK | 1,925.95 |
| ATP | 6018 | RecName gi 1102830<br>: 11,g 27806<br>Full=Try 353,g 7435<br>ptophanyl-4933,g 825<br>tRNA<br>synthetas<br>e,<br>cytoplas<br>mic;<br>AltName:<br>Full=Try<br>ptophan--<br>tRNA<br>ligase;<br>Short=Tr<br>pRS                                                                                                                                               | 53,712.80 | 100.00% | 7 | 8  | 8  | 0.07% | 24.80% | ELIEVLQ 3.53<br>PLIAEHQ<br>AR  | 1,859.04 |

|     |      |                                                                                                                                                                                                                |           |         |   |   |   |       |        |                                                    |          |
|-----|------|----------------------------------------------------------------------------------------------------------------------------------------------------------------------------------------------------------------|-----------|---------|---|---|---|-------|--------|----------------------------------------------------|----------|
| ATP | 6018 | RecName gi 1102830 :<br>11.gi 27806<br>Full=Try 353.gi 7435<br>ptophanyl:4933.gi 825<br>tRNA<br>synthetas<br>e,<br>cytoplas<br>mic;<br>AltName:<br>Full=Try<br>ptophan--<br>tRNA<br>ligase;<br>Short=Tr<br>pRS | 53,712.80 | 100.00% | 7 | 8 | 8 | 0.07% | 24.80% | IGYPKPA 3.18<br>LLHSTFF<br>PALQGA<br>QTK           | 2,485.36 |
| ATP | 6018 | RecName gi 1102830 :<br>11.gi 27806<br>Full=Try 353.gi 7435<br>ptophanyl:4933.gi 825<br>tRNA<br>synthetas<br>e,<br>cytoplas<br>mic;<br>AltName:<br>Full=Try<br>ptophan--<br>tRNA<br>ligase;<br>Short=Tr<br>pRS | 53,712.80 | 100.00% | 7 | 8 | 8 | 0.07% | 24.80% | ISFPAIQ 3.17<br>AAPSFNS<br>SFPQIFR                 | 2,325.20 |
| ATP | 6018 | RecName gi 1102830 :<br>11.gi 27806<br>Full=Try 353.gi 7435<br>ptophanyl:4933.gi 825<br>tRNA<br>synthetas<br>e,<br>cytoplas<br>mic;<br>AltName:<br>Full=Try<br>ptophan--<br>tRNA<br>ligase;<br>Short=Tr<br>pRS | 53,712.80 | 100.00% | 7 | 8 | 8 | 0.07% | 24.80% | MADMS 1.98<br>NGEQGC<br>GSPLELF<br>HSIAAQ<br>GELVR | 3,047.40 |
| ATP | 6018 | RecName gi 1102830 :<br>11.gi 27806<br>Full=Try 353.gi 7435<br>ptophanyl:4933.gi 825<br>tRNA<br>synthetas<br>e,<br>cytoplas<br>mic;<br>AltName:<br>Full=Try<br>ptophan--<br>tRNA<br>ligase;<br>Short=Tr<br>pRS | 53,712.80 | 100.00% | 7 | 8 | 8 | 0.07% | 24.80% | MSASDP 3.05<br>NSSIFLT<br>DTAK                     | 1,800.83 |



|     |      |                                                                                                                                                                                                                  |            |         |   |   |   |       |        |                                                              |          |
|-----|------|------------------------------------------------------------------------------------------------------------------------------------------------------------------------------------------------------------------|------------|---------|---|---|---|-------|--------|--------------------------------------------------------------|----------|
| ATP | 6018 | RecName gi 1102830 :<br>: 11.gi 27806<br>Full=Try 353.gi 7435<br>ptophanyl:4933.gi 825<br>tRNA<br>synthetas<br>e,<br>cytoplas<br>mic;<br>AltName:<br>Full=Try<br>ptophan--<br>tRNA<br>ligase;<br>Short=Tr<br>pRS | 53,712.80  | 100.00% | 7 | 8 | 8 | 0.07% | 24.80% | NAAKDE 3.32<br>IDSAVK                                        | 1,260.64 |
| ATP | 6018 | RecName gi 1102830 :<br>: 11.gi 27806<br>Full=Try 353.gi 7435<br>ptophanyl:4933.gi 825<br>tRNA<br>synthetas<br>e,<br>cytoplas<br>mic;<br>AltName:<br>Full=Try<br>ptophan--<br>tRNA<br>ligase;<br>Short=Tr<br>pRS | 53,712.80  | 100.00% | 7 | 8 | 8 | 0.07% | 24.80% | PALLHST 3.88<br>FFPALQ<br>GAQTK                              | 1,927.04 |
| ATP | 6018 | PREDIC gi 1198922 TED: 65<br>similar to<br>Transme<br>mbrane<br>protein<br>16F                                                                                                                                   | 106,290.10 | 100.00% | 4 | 4 | 5 | 0.04% | 8.01%  | LLQVDE 3.87<br>SIKPEQ<br>EFFTAPF<br>EK                       | 2,608.35 |
| ATP | 6018 | PREDIC gi 1198922 TED: 65<br>similar to<br>Transme<br>mbrane<br>protein<br>16F                                                                                                                                   | 106,290.10 | 100.00% | 4 | 4 | 5 | 0.04% | 8.01%  | MNDFYI 3.62<br>QDRDTF<br>FNPATR                              | 2,267.02 |
| ATP | 6018 | PREDIC gi 1198922 TED: 65<br>similar to<br>Transme<br>mbrane<br>protein<br>16F                                                                                                                                   | 106,290.10 | 100.00% | 4 | 4 | 5 | 0.04% | 8.01%  | TPEFEEF 3.49<br>NGKPD<br>LYFNDG<br>QR                        | 2,490.12 |
| ATP | 6018 | PREDIC gi 1198922 TED: 65<br>similar to<br>Transme<br>mbrane<br>protein<br>16F                                                                                                                                   | 106,290.10 | 100.00% | 4 | 4 | 5 | 0.04% | 8.01%  | TQTDYE 2.56<br>NSLTMK                                        | 1,446.64 |
| ATP | 6018 | PREDIC gi 1199007 TED: 41<br>similar to<br>AGTPBP<br>1 protein<br>isoform 1                                                                                                                                      | 133,423.40 | 99.80%  | 2 | 2 | 2 | 0.02% | 6.08%  | DYGLPV 2.75<br>TVLTCT<br>KACSHV<br>AACGNV<br>LFEGRT<br>VQLGK | 3,650.85 |

|     |      |                                                          |                                        |            |         |   |    |    |       |        |                                                           |      |          |
|-----|------|----------------------------------------------------------|----------------------------------------|------------|---------|---|----|----|-------|--------|-----------------------------------------------------------|------|----------|
| ATP | 6018 | PREDICTED:<br>similar to<br>AGTPBP1 protein<br>isoform 1 | gi 119900741                           | 133,423.40 | 99.80%  | 2 | 2  | 2  | 0.02% | 6.08%  | IAQDIER<br>LIHQSDII<br>DRVVYD<br>LDNPNY<br>TIPEEAD<br>VLK | 2.34 | 4,323.21 |
| ATP | 6018 | Vesicle-associated membrane protein 7                    | gi 109658341,gi 115495041,gi 122144644 | 24,944.90  | 99.80%  | 2 | 2  | 2  | 0.02% | 9.55%  | AFNFLN<br>EIK                                             | 2.81 | 1,095.58 |
| ATP | 6018 | Vesicle-associated membrane protein 7                    | gi 109658341,gi 115495041,gi 122144644 | 24,944.90  | 99.80%  | 2 | 2  | 2  | 0.02% | 9.55%  | VMETQA<br>QVDELK                                          | 3.76 | 1,406.68 |
| ATP | 6018 | VAPB protein                                             | gi 126010784,gi 129270105,gi 160210887 | 27,140.50  | 100.00% | 4 | 6  | 10 | 0.09% | 16.90% | ALSSSLD<br>DTEVKK                                         | 4.64 | 1,392.72 |
| ATP | 6018 | VAPB protein                                             | gi 126010784,gi 129270105,gi 160210887 | 27,140.50  | 100.00% | 4 | 6  | 10 | 0.09% | 16.90% | FRGPFT<br>DVVTTN<br>LK                                    | 3.63 | 1,594.86 |
| ATP | 6018 | VAPB protein                                             | gi 126010784,gi 129270105,gi 160210887 | 27,140.50  | 100.00% | 4 | 6  | 10 | 0.09% | 16.90% | GPFTDV<br>VTTNLK                                          | 4.12 | 1,291.69 |
| ATP | 6018 | VAPB protein                                             | gi 126010784,gi 129270105,gi 160210887 | 27,140.50  | 100.00% | 4 | 6  | 10 | 0.09% | 16.90% | VEQVLS<br>LEPQHE<br>LK                                    | 5.02 | 1,648.89 |
| ATP | 6018 | moesin                                                   | gi 114050715,gi 118583148,gi 87578169  | 67,959.00  | 100.00% | 8 | 10 | 14 | 0.12% | 20.60% | AKFYPE<br>DVSEELI<br>QDITQR                               | 3.75 | 2,281.13 |
| ATP | 6018 | moesin                                                   | gi 114050715,gi 118583148,gi 87578169  | 67,959.00  | 100.00% | 8 | 10 | 14 | 0.12% | 20.60% | APDFVF<br>YAPR                                            | 3.78 | 1,182.59 |
| ATP | 6018 | moesin                                                   | gi 114050715,gi 118583148,gi 87578169  | 67,959.00  | 100.00% | 8 | 10 | 14 | 0.12% | 20.60% | FYPEDV<br>SEELIQD<br>ITQR                                 | 3.47 | 2,082.00 |
| ATP | 6018 | moesin                                                   | gi 114050715,gi 118583148,gi 87578169  | 67,959.00  | 100.00% | 8 | 10 | 14 | 0.12% | 20.60% | GMLRED<br>AVLEYL<br>K                                     | 4.19 | 1,552.80 |
| ATP | 6018 | moesin                                                   | gi 114050715,gi 118583148,gi 87578169  | 67,959.00  | 100.00% | 8 | 10 | 14 | 0.12% | 20.60% | KAQQEL<br>EEQTRR                                          | 2.17 | 1,515.79 |
| ATP | 6018 | moesin                                                   | gi 114050715,gi 118583148,gi 87578169  | 67,959.00  | 100.00% | 8 | 10 | 14 | 0.12% | 20.60% | TAMSTP<br>HVAEPA<br>ENEQDE<br>QDENG<br>EASAE<br>LR        | 6.82 | 3,342.43 |
| ATP | 6018 | moesin                                                   | gi 114050715,gi 118583148,gi 87578169  | 67,959.00  | 100.00% | 8 | 10 | 14 | 0.12% | 20.60% | TQEQLA<br>LEMAEL<br>TAR                                   | 3.24 | 1,719.86 |
| ATP | 6018 | moesin                                                   | gi 114050715,gi 118583148,gi 87578169  | 67,959.00  | 100.00% | 8 | 10 | 14 | 0.12% | 20.60% | VTTMDA<br>ELEFAIQ<br>PNTTGG                               | 2.6  | 2,082.01 |

|     |      |                                                                                                                                                                                                                                                                          |                                                                 |         |   |   |   |       |        |                                        |          |
|-----|------|--------------------------------------------------------------------------------------------------------------------------------------------------------------------------------------------------------------------------------------------------------------------------|-----------------------------------------------------------------|---------|---|---|---|-------|--------|----------------------------------------|----------|
| ATP | 6018 | RecName<br>:<br>Full=Prot<br>ein-<br>glutamine<br>gamma-<br>glutamylt<br>ransferas<br>e 2;<br>AltName:<br>Full=Tiss<br>ue<br>transgluta<br>minase;<br>AltName:<br>Full=TGa<br>se C;<br>Short=T<br>GC;<br>Short=T<br>G(C);<br>AltName:<br>Full=Tra<br>nsglutami<br>nase-2 | gi 1729922, 77,094.70<br>gi 2913531<br>3,gi 735868<br>66,gi 818 | 99.80%  | 2 | 2 | 2 | 0.02% | 4.51%  | DHHTAD 2.1<br>LCRERL<br>VVR            | 1,819.93 |
| ATP | 6018 | RecName<br>:<br>Full=Prot<br>ein-<br>glutamine<br>gamma-<br>glutamylt<br>ransferas<br>e 2;<br>AltName:<br>Full=Tiss<br>ue<br>transgluta<br>minase;<br>AltName:<br>Full=TGa<br>se C;<br>Short=T<br>GC;<br>Short=T<br>G(C);<br>AltName:<br>Full=Tra<br>nsglutami<br>nase-2 | gi 1729922, 77,094.70<br>gi 2913531<br>3,gi 735868<br>66,gi 818 | 99.80%  | 2 | 2 | 2 | 0.02% | 4.51%  | GLLIEPA 3.43<br>ANSYLL<br>AER          | 1,729.95 |
| ATP | 6018 | PDZ and<br>LIM<br>domain 1                                                                                                                                                                                                                                               | gi 1488774 35,802.30<br>79                                      | 100.00% | 3 | 3 | 3 | 0.03% | 15.90% | ALDHSQ 4.45<br>LPSGLVI<br>DKESEV<br>YK | 2,328.21 |
| ATP | 6018 | PDZ and<br>LIM<br>domain 1                                                                                                                                                                                                                                               | gi 1488774 35,802.30<br>79                                      | 100.00% | 3 | 3 | 3 | 0.03% | 15.90% | LVGGKD 2.75<br>FEQPLAI<br>SR           | 1,629.90 |
| ATP | 6018 | PDZ and<br>LIM<br>domain 1                                                                                                                                                                                                                                               | gi 1488774 35,802.30<br>79                                      | 100.00% | 3 | 3 | 3 | 0.03% | 15.90% | SAVPFT 4.31<br>ASPASSS<br>APR          | 1,532.77 |

|     |      |                                                                                                                |                                                                                    |           |         |   |   |    |       |        |                                                    |          |
|-----|------|----------------------------------------------------------------------------------------------------------------|------------------------------------------------------------------------------------|-----------|---------|---|---|----|-------|--------|----------------------------------------------------|----------|
| ATP | 6018 | PREDIC TED: 09<br>similar to Keratin, type I cytoskeletal 24 (Cytokeratin-24) (Keratin-24) (Type I keratin-24) | gi 194676109                                                                       | 55,111.70 | 99.80%  | 2 | 3 | 5  | 0.04% | 5.33%  | KVLDDL 2.88<br>TMTR                                | 1,207.64 |
| ATP | 6018 | PREDIC TED: 09<br>similar to Keratin, type I cytoskeletal 24 (Cytokeratin-24) (Keratin-24) (Type I keratin-24) | gi 194676109                                                                       | 55,111.70 | 99.80%  | 2 | 3 | 5  | 0.04% | 5.33%  | SDLEMQ 3.84<br>IESLTEE<br>LAYLK                    | 2,112.04 |
| ATP | 6018 | H2A histone family, member Y                                                                                   | gi 114052404,gi 87578157                                                           | 39,516.80 | 99.80%  | 2 | 4 | 8  | 0.07% | 13.70% | AASADS 4.35<br>TTEGTP<br>ADGFTV<br>LSTK            | 2,127.01 |
| ATP | 6018 | H2A histone family, member Y                                                                                   | gi 114052404,gi 87578157                                                           | 39,516.80 | 99.80%  | 2 | 4 | 8  | 0.07% | 13.70% | IGVGAP 4.53<br>VYMAA<br>VLEYLT<br>AEILELA<br>GNAAR | 2,991.59 |
| ATP | 6018 | PREDIC TED: 15,gi 119922774<br>transmembrane protein 33 isoform 2                                              | gi 119893815,gi 119922774                                                          | 27,968.00 | 99.80%  | 2 | 2 | 2  | 0.02% | 8.10%  | ALLANA 3.73<br>LTSALR                              | 1,213.73 |
| ATP | 6018 | PREDIC TED: 15,gi 119922774<br>transmembrane protein 33 isoform 2                                              | gi 119893815,gi 119922774                                                          | 27,968.00 | 99.80%  | 2 | 2 | 2  | 0.02% | 8.10%  | LPHFQLS 2.64<br>R                                  | 997.5578 |
| ATP | 6018 | Chain A, Crystallization And Structure Determination Of Bovine Profilin At 2.0 Angstroms Resolution            | gi 157833536,gi 157878211,gi 576369,gi 59858521,gi 6288870,gi 62751593,gi 73586531 | 15,039.50 | 100.00% | 6 | 7 | 13 | 0.11% | 50.70% | DSLLQD 4.03<br>GEFTMD<br>LR                        | 1,655.76 |

|     |      |                                                                                                                   |                                                                         |           |         |   |   |    |       |        |                                 |          |
|-----|------|-------------------------------------------------------------------------------------------------------------------|-------------------------------------------------------------------------|-----------|---------|---|---|----|-------|--------|---------------------------------|----------|
| ATP | 6018 | Chain A, gi 1578335<br>Crystallization And Structure Determination Of Bovine Profilin At 2.0 Angstroms Resolution | 36,gi 157878211,gi 576369,gi 59858521,gi 628870,gi 62751593,gi 73586531 | 15,039.50 | 100.00% | 6 | 7 | 13 | 0.11% | 50.70% | SSFFVNG 3.46<br>LTLGGQ<br>K     | 1,454.76 |
| ATP | 6018 | Chain A, gi 1578335<br>Crystallization And Structure Determination Of Bovine Profilin At 2.0 Angstroms Resolution | 36,gi 157878211,gi 576369,gi 59858521,gi 628870,gi 62751593,gi 73586531 | 15,039.50 | 100.00% | 6 | 7 | 13 | 0.11% | 50.70% | STGGAP 4.03<br>TFNITVT<br>MTAK  | 1,712.85 |
| ATP | 6018 | Chain A, gi 1578335<br>Crystallization And Structure Determination Of Bovine Profilin At 2.0 Angstroms Resolution | 36,gi 157878211,gi 576369,gi 59858521,gi 628870,gi 62751593,gi 73586531 | 15,039.50 | 100.00% | 6 | 7 | 13 | 0.11% | 50.70% | TFVNITP 4.75<br>AEVGILV<br>GK   | 1,657.95 |
| ATP | 6018 | Chain A, gi 1578335<br>Crystallization And Structure Determination Of Bovine Profilin At 2.0 Angstroms Resolution | 36,gi 157878211,gi 576369,gi 59858521,gi 628870,gi 62751593,gi 73586531 | 15,039.50 | 100.00% | 6 | 7 | 13 | 0.11% | 50.70% | TFVNITP 2.78<br>AEVGILV<br>GKDR | 1,929.08 |
| ATP | 6018 | Chain A, gi 1578335<br>Crystallization And Structure Determination Of Bovine Profilin At 2.0 Angstroms Resolution | 36,gi 157878211,gi 576369,gi 59858521,gi 628870,gi 62751593,gi 73586531 | 15,039.50 | 100.00% | 6 | 7 | 13 | 0.11% | 50.70% | TLVLLM 2.19<br>GK               | 890.5382 |

|     |      |                                                                       |                                                                  |            |         |   |   |   |       |        |                                               |      |          |
|-----|------|-----------------------------------------------------------------------|------------------------------------------------------------------|------------|---------|---|---|---|-------|--------|-----------------------------------------------|------|----------|
| ATP | 6018 | Cell<br>adhesion<br>molecule<br>1                                     | gi 8363879<br>8,gi 843701<br>45                                  | 45,751.20  | 99.80%  | 2 | 3 | 3 | 0.03% | 12.70% | GADDA<br>DADTAI<br>NAEGGQ<br>NNSEK<br>KEYFI   | 6.31 | 3,156.42 |
| ATP | 6018 | Cell<br>adhesion<br>molecule<br>1                                     | gi 8363879<br>8,gi 843701<br>45                                  | 45,751.20  | 99.80%  | 2 | 3 | 3 | 0.03% | 12.70% | YLEVQY<br>KPQVHI<br>QMTYPL<br>QGLTR           | 4.43 | 2,821.47 |
| ATP | 6018 | Brain<br>abundant,<br>membran<br>e<br>attached<br>signal<br>protein 1 | gi 1153047<br>57,gi 19300<br>63,gi 27807<br>507,gi 6686<br>271   | 22,992.60  | 100.00% | 3 | 3 | 4 | 0.03% | 20.30% | AQAPAA<br>PADEVK<br>PAETPA<br>ANSDQT<br>VAVK  | 2.84 | 2,747.38 |
| ATP | 6018 | Brain<br>abundant,<br>membran<br>e<br>attached<br>signal<br>protein 1 | gi 1153047<br>57,gi 19300<br>63,gi 27807<br>507,gi 6686<br>271   | 22,992.60  | 100.00% | 3 | 3 | 4 | 0.03% | 20.30% | AQAPAA<br>PADEVK<br>PAETPA<br>ANSDQT<br>VAVKE | 3.14 | 2,876.43 |
| ATP | 6018 | Brain<br>abundant,<br>membran<br>e<br>attached<br>signal<br>protein 1 | gi 1153047<br>57,gi 19300<br>63,gi 27807<br>507,gi 6686<br>271   | 22,992.60  | 100.00% | 3 | 3 | 4 | 0.03% | 20.30% | ASEAEA<br>AEPAAP<br>TKDDK                     | 2.21 | 1,700.80 |
| ATP | 6018 | Heme<br>oxygenas<br>e<br>(decyclin<br>g) 1                            | gi 1584551<br>52,gi 59858<br>301,gi 6246<br>0520,gi 739<br>19958 | 32,922.40  | 100.00% | 5 | 7 | 8 | 0.07% | 31.10% | ALNLPSS<br>GEGRAF<br>FTFPNIA<br>SATK          | 5.16 | 2,453.27 |
| ATP | 6018 | Heme<br>oxygenas<br>e<br>(decyclin<br>g) 1                            | gi 1584551<br>52,gi 59858<br>301,gi 6246<br>0520,gi 739<br>19958 | 32,922.40  | 100.00% | 5 | 7 | 8 | 0.07% | 31.10% | EATKEV<br>HTQAEN<br>AEFMK                     | 3.1  | 1,978.92 |
| ATP | 6018 | Heme<br>oxygenas<br>e<br>(decyclin<br>g) 1                            | gi 1584551<br>52,gi 59858<br>301,gi 6246<br>0520,gi 739<br>19958 | 32,922.40  | 100.00% | 5 | 7 | 8 | 0.07% | 31.10% | LVMASL<br>YHIYVA<br>LEEEIER                   | 4.28 | 2,294.17 |
| ATP | 6018 | Heme<br>oxygenas<br>e<br>(decyclin<br>g) 1                            | gi 1584551<br>52,gi 59858<br>301,gi 6246<br>0520,gi 739<br>19958 | 32,922.40  | 100.00% | 5 | 7 | 8 | 0.07% | 31.10% | NKENPV<br>YTPLYFP<br>EELHR                    | 5.86 | 2,246.12 |
| ATP | 6018 | Heme<br>oxygenas<br>e<br>(decyclin<br>g) 1                            | gi 1584551<br>52,gi 59858<br>301,gi 6246<br>0520,gi 739<br>19958 | 32,922.40  | 100.00% | 5 | 7 | 8 | 0.07% | 31.10% | YLGDL<br>GGQVLK                               | 2.88 | 1,249.68 |
| ATP | 6018 | RecName<br>:<br>Full=Thr<br>ombospo<br>ndin-1;<br>Flags:<br>Precursor | gi 1264442<br>8,gi 224470<br>7,gi 413866<br>85                   | 129,515.10 | 100.00% | 8 | 8 | 9 | 0.08% | 8.89%  | DTDMD<br>GVGDQC<br>DNCPL<br>HNPDQL<br>DSDSDR  | 4.73 | 3,222.22 |

|     |      |                                                                                    |                                                                          |            |         |   |   |   |       |        |                                                           |      |          |
|-----|------|------------------------------------------------------------------------------------|--------------------------------------------------------------------------|------------|---------|---|---|---|-------|--------|-----------------------------------------------------------|------|----------|
| ATP | 6018 | RecName<br>:<br>Full=Thr<br>ombospo<br>ndin-1;<br>Flags:<br>Precursor              | gi 1264442<br>8,gi 224470<br>7,gi 413866                                 | 129,515.10 | 100.00% | 8 | 8 | 9 | 0.08% | 8.89%  | FQDLVD<br>AVR                                             | 3.02 | 1,062.56 |
| ATP | 6018 | RecName<br>:<br>Full=Thr<br>ombospo<br>ndin-1;<br>Flags:<br>Precursor              | gi 1264442<br>8,gi 224470<br>7,gi 413866                                 | 129,515.10 | 100.00% | 8 | 8 | 9 | 0.08% | 8.89%  | FVFGTTP<br>EDILR                                          | 3.13 | 1,394.73 |
| ATP | 6018 | RecName<br>:<br>Full=Thr<br>ombospo<br>ndin-1;<br>Flags:<br>Precursor              | gi 1264442<br>8,gi 224470<br>7,gi 413866                                 | 129,515.10 | 100.00% | 8 | 8 | 9 | 0.08% | 8.89%  | GGVNDN<br>FQGVLLQ<br>NVR                                  | 3.75 | 1,616.81 |
| ATP | 6018 | RecName<br>:<br>Full=Thr<br>ombospo<br>ndin-1;<br>Flags:<br>Precursor              | gi 1264442<br>8,gi 224470<br>7,gi 413866                                 | 129,515.10 | 100.00% | 8 | 8 | 9 | 0.08% | 8.89%  | IEDANLI<br>PPVPDK<br>K                                    | 2.93 | 1,548.86 |
| ATP | 6018 | RecName<br>:<br>Full=Thr<br>ombospo<br>ndin-1;<br>Flags:<br>Precursor              | gi 1264442<br>8,gi 224470<br>7,gi 413866                                 | 129,515.10 | 100.00% | 8 | 8 | 9 | 0.08% | 8.89%  | KVTEEN<br>KELANE<br>LR                                    | 4.31 | 1,672.89 |
| ATP | 6018 | RecName<br>:<br>Full=Thr<br>ombospo<br>ndin-1;<br>Flags:<br>Precursor              | gi 1264442<br>8,gi 224470<br>7,gi 413866                                 | 129,515.10 | 100.00% | 8 | 8 | 9 | 0.08% | 8.89%  | TIVTTLQ<br>DSIR                                           | 2.28 | 1,246.70 |
| ATP | 6018 | RecName<br>:<br>Full=Thr<br>ombospo<br>ndin-1;<br>Flags:<br>Precursor              | gi 1264442<br>8,gi 224470<br>7,gi 413866                                 | 129,515.10 | 100.00% | 8 | 8 | 9 | 0.08% | 8.89%  | VTEENK<br>ELANEL<br>R                                     | 2.85 | 1,544.79 |
| ATP | 6018 | RecName<br>:<br>Full=CD<br>151<br>antigen;<br>AltName:<br>CD_antig<br>en=CD15<br>1 | gi 1221407<br>84,gi 15294<br>1162,gi 735<br>151<br>87135,gi 78<br>369214 | 27,969.10  | 99.80%  | 2 | 2 | 4 | 0.03% | 20.60% | RNLLRL<br>YFGLLLI<br>IFLLEIIA<br>GALAYI<br>YYQQLN<br>AELK | 3.47 | 4,355.53 |

|     |      |                                                                                                                                                                                         |                                                                                                                                        |           |         |   |   |   |       |        |                                                |      |          |
|-----|------|-----------------------------------------------------------------------------------------------------------------------------------------------------------------------------------------|----------------------------------------------------------------------------------------------------------------------------------------|-----------|---------|---|---|---|-------|--------|------------------------------------------------|------|----------|
| ATP | 6018 | RecName<br>:<br>Full=CD<br>151<br>antigen;<br>AltName:<br>CD_antig<br>en=CD15<br>1                                                                                                      | gi 1221407<br>84,gi 15294<br>1162,gi 735<br>87135,gi 78<br>369214                                                                      | 27,969.10 | 99.80%  | 2 | 2 | 4 | 0.03% | 20.60% | YHQPGH<br>EGV TSA<br>VDK                       | 3.88 | 1,624.77 |
| ATP | 6018 | RecName<br>:<br>Full=Thi<br>oredoxin<br>domain-<br>containin<br>g protein<br>4; Flags:<br>Precursor                                                                                     | gi 1088619<br>17,gi 74354<br>589,gi 7804<br>2524                                                                                       | 46,819.40 | 100.00% | 3 | 4 | 4 | 0.03% | 15.80% | FSQMLH<br>PIFEEAS<br>NVIKEE<br>YPNANQ<br>VVFAR | 6.25 | 3,523.73 |
| ATP | 6018 | RecName<br>:<br>Full=Thi<br>oredoxin<br>domain-<br>containin<br>g protein<br>4; Flags:<br>Precursor                                                                                     | gi 1088619<br>17,gi 74354<br>589,gi 7804<br>2524                                                                                       | 46,819.40 | 100.00% | 3 | 4 | 4 | 0.03% | 15.80% | HMYVFG<br>DFRDVLI<br>PGK                       | 2    | 1,909.96 |
| ATP | 6018 | RecName<br>:<br>Full=Thi<br>oredoxin<br>domain-<br>containin<br>g protein<br>4; Flags:<br>Precursor                                                                                     | gi 1088619<br>17,gi 74354<br>589,gi 7804<br>2524                                                                                       | 46,819.40 | 100.00% | 3 | 4 | 4 | 0.03% | 15.80% | SDPIQEL<br>HDLAELIT<br>TPDR                    | 4.49 | 2,050.01 |
| ATP | 6018 | RecName<br>:<br>Full=Mit<br>ochondri<br>al 2-<br>oxoglutar<br>ate/malat<br>e carrier<br>protein;<br>Short=O<br>GCP;<br>AltName:<br>Full=Solu<br>te carrier<br>family 25<br>member<br>11 | gi 126664,g<br>i 14623167<br>6,gi 148744<br>036,gi 1488<br>78065,gi 16<br>3432,gi 163<br>434,gi 2780<br>7211,gi 32,<br>gi 5985797<br>7 | 33,881.70 | 100.00% | 3 | 4 | 5 | 0.04% | 14.80% | AVVVNA<br>AQLASY<br>SQSK                       | 4.39 | 1,635.87 |



|     |      |                                                                                                                                                                                         |                                                                                                                                        |           |         |   |    |    |       |        |                                     |      |          |
|-----|------|-----------------------------------------------------------------------------------------------------------------------------------------------------------------------------------------|----------------------------------------------------------------------------------------------------------------------------------------|-----------|---------|---|----|----|-------|--------|-------------------------------------|------|----------|
| ATP | 6018 | RecName<br>:<br>Full=Mit<br>ochondri<br>al 2-<br>oxoglutar<br>ate/malat<br>e carrier<br>protein;<br>Short=O<br>GCP;<br>AltName:<br>Full=Solu<br>te carrier<br>family 25<br>member<br>11 | gi 126664.g<br>i 14623167<br>6,gi 148744<br>036,gi 1488<br>78065,gi 16<br>3432,gi 163<br>434,gi 2780<br>7211,gi 32,<br>gi 5985797<br>7 | 33,881.70 | 100.00% | 3 | 4  | 5  | 0.04% | 14.80% | FLFGGL<br>AGMGAT<br>VVFVQPL<br>DLVK | 5.52 | 2,296.24 |
| ATP | 6018 | RecName<br>:<br>Full=Mit<br>ochondri<br>al 2-<br>oxoglutar<br>ate/malat<br>e carrier<br>protein;<br>Short=O<br>GCP;<br>AltName:<br>Full=Solu<br>te carrier<br>family 25<br>member<br>11 | gi 126664.g<br>i 14623167<br>6,gi 148744<br>036,gi 1488<br>78065,gi 16<br>3432,gi 163<br>434,gi 2780<br>7211,gi 32,<br>gi 5985797<br>7 | 33,881.70 | 100.00% | 3 | 4  | 5  | 0.04% | 14.80% | NVFNAL<br>FR                        | 2.11 | 980.5311 |
| ATP | 6018 | prolyl 4-<br>hydroxyla<br>se, alpha<br>I subunit                                                                                                                                        | gi 1154950<br>19,gi 12214<br>4801,gi 151<br>556370,gi 9<br>2097479                                                                     | 60,994.20 | 99.80%  | 2 | 2  | 2  | 0.02% | 3.93%  | LQDTYN<br>LDTDTIS<br>K              | 3.99 | 1,626.79 |
| ATP | 6018 | prolyl 4-<br>hydroxyla<br>se, alpha<br>I subunit                                                                                                                                        | gi 1154950<br>19,gi 12214<br>4801,gi 151<br>556370,gi 9<br>2097479                                                                     | 60,994.20 | 99.80%  | 2 | 2  | 2  | 0.02% | 3.93%  | LQDTYN<br>LDTDTIS<br>KGDLP<br>VK    | 3.45 | 2,293.16 |
| ATP | 6018 | ER lipid<br>raft<br>associate<br>d 2                                                                                                                                                    | gi 1140510<br>93,gi 12213<br>4590,gi 920<br>97476                                                                                      | 37,713.20 | 100.00% | 3 | 3  | 4  | 0.03% | 14.20% | GGALLT<br>STSGPGF<br>HMLPFI<br>TSYK | 3.59 | 2,511.30 |
| ATP | 6018 | ER lipid<br>raft<br>associate<br>d 2                                                                                                                                                    | gi 1140510<br>93,gi 12213<br>4590,gi 920<br>97476                                                                                      | 37,713.20 | 100.00% | 3 | 3  | 4  | 0.03% | 14.20% | SVQTTL<br>QTDEVK                    | 3.43 | 1,348.70 |
| ATP | 6018 | ER lipid<br>raft<br>associate<br>d 2                                                                                                                                                    | gi 1140510<br>93,gi 12213<br>4590,gi 920<br>97476                                                                                      | 37,713.20 | 100.00% | 3 | 3  | 4  | 0.03% | 14.20% | VAQVAE<br>ITFGQK                    | 2.87 | 1,290.71 |
| ATP | 6018 | ATAD3A<br>protein                                                                                                                                                                       | gi 1572788<br>89,gi 15742<br>8048,gi 162<br>416153                                                                                     | 66,090.40 | 100.00% | 8 | 10 | 13 | 0.11% | 17.90% | ATLNAF<br>LHR                       | 2.85 | 1,042.58 |
| ATP | 6018 | ATAD3A<br>protein                                                                                                                                                                       | gi 1572788<br>89,gi 15742<br>8048,gi 162<br>416153                                                                                     | 66,090.40 | 100.00% | 8 | 10 | 13 | 0.11% | 17.90% | ITVLEAL<br>R                        | 2.66 | 914.567  |

|     |      |                                           |                                                 |           |         |   |    |    |       |        |                                    |      |          |
|-----|------|-------------------------------------------|-------------------------------------------------|-----------|---------|---|----|----|-------|--------|------------------------------------|------|----------|
| ATP | 6018 | ATAD3A protein                            | gi 157278889,gi 157428048,gi 162416153          | 66,090.40 | 100.00% | 8 | 10 | 13 | 0.11% | 17.90% | LKEYEA<br>AVEQLK<br>GDQIR          | 4.54 | 1,990.06 |
| ATP | 6018 | ATAD3A protein                            | gi 157278889,gi 157428048,gi 162416153          | 66,090.40 | 100.00% | 8 | 10 | 13 | 0.11% | 17.90% | MYFDKY<br>VLKPAT<br>EGK            | 3.19 | 1,805.91 |
| ATP | 6018 | ATAD3A protein                            | gi 157278889,gi 157428048,gi 162416153          | 66,090.40 | 100.00% | 8 | 10 | 13 | 0.11% | 17.90% | NVLMYG<br>PPGTGK                   | 3.18 | 1,249.62 |
| ATP | 6018 | ATAD3A protein                            | gi 157278889,gi 157428048,gi 162416153          | 66,090.40 | 100.00% | 8 | 10 | 13 | 0.11% | 17.90% | QQQLLN<br>EENLR                    | 2.7  | 1,384.72 |
| ATP | 6018 | ATAD3A protein                            | gi 157278889,gi 157428048,gi 162416153          | 66,090.40 | 100.00% | 8 | 10 | 13 | 0.11% | 17.90% | RLLSKP<br>QDALEG<br>VVLSPSL<br>EAR | 5.04 | 2,378.34 |
| ATP | 6018 | ATAD3A protein                            | gi 157278889,gi 157428048,gi 162416153          | 66,090.40 | 100.00% | 8 | 10 | 13 | 0.11% | 17.90% | TAGTLF<br>GEGFR                    | 3.31 | 1,155.58 |
| ATP | 6018 | glucose-regulated protein GRP94 precursor | gi 16041057,gi 27807263,gi 33301108,gi 75775556 | 92,411.40 | 100.00% | 6 | 7  | 9  | 0.08% | 9.95%  | EEADSY<br>LELDTIK                  | 4.27 | 1,525.73 |
| ATP | 6018 | glucose-regulated protein GRP94 precursor | gi 16041057,gi 27807263,gi 33301108,gi 75775556 | 92,411.40 | 100.00% | 6 | 7  | 9  | 0.08% | 9.95%  | ELISNAS<br>DALDKI<br>R             | 3.84 | 1,544.83 |
| ATP | 6018 | glucose-regulated protein GRP94 precursor | gi 16041057,gi 27807263,gi 33301108,gi 75775556 | 92,411.40 | 100.00% | 6 | 7  | 9  | 0.08% | 9.95%  | FQSSH<br>PSDMTS<br>LDQYVE<br>R     | 4.77 | 2,280.00 |
| ATP | 6018 | glucose-regulated protein GRP94 precursor | gi 16041057,gi 27807263,gi 33301108,gi 75775556 | 92,411.40 | 100.00% | 6 | 7  | 9  | 0.08% | 9.95%  | GLFDEY<br>GSK                      | 2.2  | 1,015.47 |
| ATP | 6018 | glucose-regulated protein GRP94 precursor | gi 16041057,gi 27807263,gi 33301108,gi 75775556 | 92,411.40 | 100.00% | 6 | 7  | 9  | 0.08% | 9.95%  | NLLHVT<br>DTGVG<br>MTR             | 4.62 | 1,529.77 |
| ATP | 6018 | glucose-regulated protein GRP94 precursor | gi 16041057,gi 27807263,gi 33301108,gi 75775556 | 92,411.40 | 100.00% | 6 | 7  | 9  | 0.08% | 9.95%  | SILFVPT<br>SAPR                    | 3.66 | 1,187.68 |

|     |      |                                                                                                              |                  |            |         |    |    |    |       |        |                            |      |          |
|-----|------|--------------------------------------------------------------------------------------------------------------|------------------|------------|---------|----|----|----|-------|--------|----------------------------|------|----------|
| ATP | 6018 | PREDICTED:<br>similar to<br>FXFD<br>domain-<br>containing<br>ion<br>transport<br>regulator<br>5 isoform<br>1 | gi 7664118<br>6  | 18,921.80  | 99.80%  | 2  | 2  | 2  | 0.02% | 10.40% | EDDPFF<br>YDETL<br>R       | 3.19 | 1,661.70 |
| ATP | 6018 | PREDICTED:<br>similar to<br>FXFD<br>domain-<br>containing<br>ion<br>transport<br>regulator<br>5 isoform<br>1 | gi 7664118<br>6  | 18,921.80  | 99.80%  | 2  | 2  | 2  | 0.02% | 10.40% | QPGSKE<br>DDPFFY<br>DETLR  | 3.51 | 2,158.96 |
| ATP | 6018 | PREDICTED:<br>similar to<br>catenin,<br>delta 1                                                              | gi 1946735<br>32 | 106,846.20 | 100.00% | 11 | 12 | 15 | 0.13% | 12.20% | ALSAIAD<br>LLTNEH<br>ER    | 4.7  | 1,652.86 |
| ATP | 6018 | PREDICTED:<br>similar to<br>catenin,<br>delta 1                                                              | gi 1946735<br>32 | 106,846.20 | 100.00% | 11 | 12 | 15 | 0.13% | 12.20% | APSRQD<br>VYGPQP<br>QVR    | 4.39 | 1,697.87 |
| ATP | 6018 | PREDICTED:<br>similar to<br>catenin,<br>delta 1                                                              | gi 1946735<br>32 | 106,846.20 | 100.00% | 11 | 12 | 15 | 0.13% | 12.20% | FHPEPY<br>GLEDDQ<br>R      | 3.16 | 1,602.72 |
| ATP | 6018 | PREDICTED:<br>similar to<br>catenin,<br>delta 1                                                              | gi 1946735<br>32 | 106,846.20 | 100.00% | 11 | 12 | 15 | 0.13% | 12.20% | FVGDAD<br>LER              | 2.83 | 1,021.50 |
| ATP | 6018 | PREDICTED:<br>similar to<br>catenin,<br>delta 1                                                              | gi 1946735<br>32 | 106,846.20 | 100.00% | 11 | 12 | 15 | 0.13% | 12.20% | GKKPTE<br>DPTNDT<br>VDFPK  | 3.9  | 1,888.93 |
| ATP | 6018 | PREDICTED:<br>similar to<br>catenin,<br>delta 1                                                              | gi 1946735<br>32 | 106,846.20 | 100.00% | 11 | 12 | 15 | 0.13% | 12.20% | HYEDGY<br>PGSGDN<br>YGSLSR | 3.87 | 1,973.83 |
| ATP | 6018 | PREDICTED:<br>similar to<br>catenin,<br>delta 1                                                              | gi 1946735<br>32 | 106,846.20 | 100.00% | 11 | 12 | 15 | 0.13% | 12.20% | KPTEDP<br>TNDTVD<br>FPK    | 3.19 | 1,703.81 |
| ATP | 6018 | PREDICTED:<br>similar to<br>catenin,<br>delta 1                                                              | gi 1946735<br>32 | 106,846.20 | 100.00% | 11 | 12 | 15 | 0.13% | 12.20% | KPTEDP<br>TNDTVD<br>FPKR   | 4.66 | 1,859.91 |
| ATP | 6018 | PREDICTED:<br>similar to<br>catenin,<br>delta 1                                                              | gi 1946735<br>32 | 106,846.20 | 100.00% | 11 | 12 | 15 | 0.13% | 12.20% | QDVYGP<br>QPQVR            | 2.72 | 1,286.65 |

|     |      |                                             |                                       |            |         |    |    |    |       |        |                                                 |      |          |
|-----|------|---------------------------------------------|---------------------------------------|------------|---------|----|----|----|-------|--------|-------------------------------------------------|------|----------|
| ATP | 6018 | PREDIC TED:<br>similar to catenin, delta 1  | gi 194673532                          | 106,846.20 | 100.00% | 11 | 12 | 15 | 0.13% | 12.20% | SLDNNY<br>STLNER                                | 3.72 | 1,425.66 |
| ATP | 6018 | PREDIC TED:<br>similar to catenin, delta 1  | gi 194673532                          | 106,846.20 | 100.00% | 11 | 12 | 15 | 0.13% | 12.20% | VSPQDA<br>SPLLAN<br>GTLTR                       | 5.54 | 1,739.93 |
| ATP | 6018 | FK506 binding protein 11, 19 kDa            | gi 114053349,gi 122138212,gi 82571590 | 22,457.80  | 100.00% | 5  | 6  | 12 | 0.10% | 15.30% | DPLVIEL<br>GQK                                  | 3.5  | 1,111.64 |
| ATP | 6018 | FK506 binding protein 11, 19 kDa            | gi 114053349,gi 122138212,gi 82571590 | 22,457.80  | 100.00% | 5  | 6  | 12 | 0.10% | 15.30% | IFDTSLT<br>RDPLVIE<br>LGQK                      | 4.75 | 2,045.13 |
| ATP | 6018 | FK506 binding protein 11, 19 kDa            | gi 114053349,gi 122138212,gi 82571590 | 22,457.80  | 100.00% | 5  | 6  | 12 | 0.10% | 15.30% | RVIIPSH<br>LAYGK                                | 3.94 | 1,353.80 |
| ATP | 6018 | FK506 binding protein 11, 19 kDa            | gi 114053349,gi 122138212,gi 82571590 | 22,457.80  | 100.00% | 5  | 6  | 12 | 0.10% | 15.30% | VIIPSHL<br>AYGK                                 | 2.82 | 1,197.70 |
| ATP | 6018 | FK506 binding protein 11, 19 kDa            | gi 114053349,gi 122138212,gi 82571590 | 22,457.80  | 100.00% | 5  | 6  | 12 | 0.10% | 15.30% | VIIPSHL<br>AYGKR                                | 1.76 | 1,353.80 |
| ATP | 6018 | SPTLC2 protein                              | gi 148745525,gi 149642795             | 62,871.50  | 100.00% | 4  | 4  | 6  | 0.05% | 16.40% | EEQKDF<br>VSLYQD<br>FENFYT<br>R                 | 4.04 | 2,458.12 |
| ATP | 6018 | SPTLC2 protein                              | gi 148745525,gi 149642795             | 62,871.50  | 100.00% | 4  | 4  | 6  | 0.05% | 16.40% | LVANFL<br>GVEAAM<br>AYGMGF<br>ATNSMN<br>IPALVSK | 3.11 | 3,203.59 |
| ATP | 6018 | SPTLC2 protein                              | gi 148745525,gi 149642795             | 62,871.50  | 100.00% | 4  | 4  | 6  | 0.05% | 16.40% | NIGVVV<br>VGFPAT<br>PIESR                       | 5.54 | 1,868.06 |
| ATP | 6018 | SPTLC2 protein                              | gi 148745525,gi 149642795             | 62,871.50  | 100.00% | 4  | 4  | 6  | 0.05% | 16.40% | SSAAAA<br>AAAAGQ<br>IHHVTE<br>NGGLYK            | 3.97 | 2,295.15 |
| ATP | 6018 | endoglin                                    | gi 115497110,gi 92097469              | 69,885.10  | 99.90%  | 2  | 3  | 5  | 0.04% | 3.25%  | FSLLR                                           | 1.7  | 782.4559 |
| ATP | 6018 | endoglin                                    | gi 115497110,gi 92097469              | 69,885.10  | 99.90%  | 2  | 3  | 5  | 0.04% | 3.25%  | LQAPGIP<br>LQLAYD<br>SK                         | 3.99 | 1,613.89 |
| ATP | 6018 | non-POU domain containin g, octamer-binding | gi 114053303,gi 86821913              | 54,103.50  | 99.80%  | 2  | 2  | 2  | 0.02% | 7.45%  | GIVEFSG<br>KPAAR                                | 2.88 | 1,231.68 |

|     |      |                                              |                           |            |         |   |   |   |       |        |                                     |      |          |
|-----|------|----------------------------------------------|---------------------------|------------|---------|---|---|---|-------|--------|-------------------------------------|------|----------|
| ATP | 6018 | non-POU domain containin g, octamer-binding  | gi 114053303,gi 86821913  | 54,103.50  | 99.80%  | 2 | 2 | 2 | 0.02% | 7.45%  | NLPQYV<br>SNELLE<br>AFSVFG<br>QVER  | 4.39 | 2,668.33 |
| ATP | 6018 | PREDICTED: similar to neuropilin-1 isoform 1 | gi 76632212,gi 76632226   | 102,993.80 | 100.00% | 4 | 5 | 6 | 0.05% | 7.04%  | DKLNPQ<br>STYSEA                    | 2.97 | 1,352.63 |
| ATP | 6018 | PREDICTED: similar to neuropilin-1 isoform 1 | gi 76632212,gi 76632226   | 102,993.80 | 100.00% | 4 | 5 | 6 | 0.05% | 7.04%  | IAPSSFV<br>SSGPFLF<br>IK            | 3.55 | 1,696.93 |
| ATP | 6018 | PREDICTED: similar to neuropilin-1 isoform 1 | gi 76632212,gi 76632226   | 102,993.80 | 100.00% | 4 | 5 | 6 | 0.05% | 7.04%  | SFEGNN<br>NYDTPE<br>LR              | 3.62 | 1,655.73 |
| ATP | 6018 | PREDICTED: similar to neuropilin-1 isoform 1 | gi 76632212,gi 76632226   | 102,993.80 | 100.00% | 4 | 5 | 6 | 0.05% | 7.04%  | TGPIQDH<br>TGDGNFI<br>YSQADE<br>NQK | 4.52 | 2,535.14 |
| ATP | 6018 | PREDICTED: similar to pincher isoform 1      | gi 76627466               | 61,009.90  | 100.00% | 6 | 6 | 6 | 0.05% | 13.90% | GGTGAD<br>PVQTVT<br>GGLR            | 3.94 | 1,485.77 |
| ATP | 6018 | PREDICTED: similar to pincher isoform 1      | gi 76627466               | 61,009.90  | 100.00% | 6 | 6 | 6 | 0.05% | 13.90% | LFEAEA<br>QDLFR                     | 3.28 | 1,338.67 |
| ATP | 6018 | PREDICTED: similar to pincher isoform 1      | gi 76627466               | 61,009.90  | 100.00% | 6 | 6 | 6 | 0.05% | 13.90% | LIEAVDN<br>MLTNK                    | 3.33 | 1,376.71 |
| ATP | 6018 | PREDICTED: similar to pincher isoform 1      | gi 76627466               | 61,009.90  | 100.00% | 6 | 6 | 6 | 0.05% | 13.90% | LPEIYIQ<br>LQR                      | 3.19 | 1,272.73 |
| ATP | 6018 | PREDICTED: similar to pincher isoform 1      | gi 76627466               | 61,009.90  | 100.00% | 6 | 6 | 6 | 0.05% | 13.90% | SISIIDSP<br>GILSGEK                 | 4.32 | 1,515.83 |
| ATP | 6018 | PREDICTED: similar to pincher isoform 1      | gi 76627466               | 61,009.90  | 100.00% | 6 | 6 | 6 | 0.05% | 13.90% | YLLEQD<br>FPGMR                     | 2.91 | 1,384.66 |
| ATP | 6018 | RRAS2 protein                                | gi 148743916,gi 149944707 | 23,381.60  | 99.80%  | 2 | 2 | 2 | 0.02% | 13.70% | LDILDTA<br>GQEEFG<br>AMR            | 4.99 | 1,781.84 |
| ATP | 6018 | RRAS2 protein                                | gi 148743916,gi 149944707 | 23,381.60  | 99.80%  | 2 | 2 | 2 | 0.02% | 13.70% | MNVQD<br>AFHELV<br>R                | 2.96 | 1,474.71 |
| ATP | 6018 | STX6 protein                                 | gi 126010683,gi 126723527 | 29,055.10  | 99.80%  | 2 | 2 | 2 | 0.02% | 9.41%  | AVNTAQ<br>GLFQR                     | 3.27 | 1,204.64 |

|     |      |                                                                         |                                                                                   |           |         |   |   |   |       |        |                                                |      |          |
|-----|------|-------------------------------------------------------------------------|-----------------------------------------------------------------------------------|-----------|---------|---|---|---|-------|--------|------------------------------------------------|------|----------|
| ATP | 6018 | STX6 protein                                                            | gi 126010683,gi 126723527                                                         | 29,055.10 | 99.80%  | 2 | 2 | 2 | 0.02% | 9.41%  | KFNLDA<br>TELSIRK                              | 3.32 | 1,534.86 |
| ATP | 6018 | ERGIC and golgi 2                                                       | gi 113912114,gi 115497448                                                         | 42,596.10 | 100.00% | 2 | 2 | 2 | 0.02% | 9.28%  | IDHLSFG<br>ELVPGII<br>NPLDGT<br>EK             | 2.98 | 2,364.25 |
| ATP | 6018 | ERGIC and golgi 2                                                       | gi 113912114,gi 115497448                                                         | 42,596.10 | 100.00% | 2 | 2 | 2 | 0.02% | 9.28%  | ISADTHQ<br>FAVTER                              | 3.01 | 1,474.73 |
| ATP | 6018 | heme oxygenase (decyclin g) 2                                           | gi 164448721                                                                      | 37,538.70 | 99.80%  | 2 | 2 | 2 | 0.02% | 10.20% | AFEFNM<br>QVFNEL<br>DQAGSL<br>LAK              | 2.88 | 2,388.15 |
| ATP | 6018 | heme oxygenase (decyclin g) 2                                           | gi 164448721                                                                      | 37,538.70 | 99.80%  | 2 | 2 | 2 | 0.02% | 10.20% | YMGDLS<br>GGQVLK<br>K                          | 3.24 | 1,411.73 |
| ATP | 6018 | ATPase, Na+/K+ transporting, beta 3 polypeptide                         | gi 74354619,gi 78369424,gi 90111969                                               | 31,504.70 | 99.80%  | 2 | 3 | 3 | 0.03% | 8.60%  | DQIPSPG<br>LMVFPK                              | 2.49 | 1,444.75 |
| ATP | 6018 | ATPase, Na+/K+ transporting, beta 3 polypeptide                         | gi 74354619,gi 78369424,gi 90111969                                               | 31,504.70 | 99.80%  | 2 | 3 | 3 | 0.03% | 8.60%  | IIGLKPQ<br>GEPR                                | 3    | 1,207.72 |
| ATP | 6018 | endothelial differentiation, sphingolipid G-protein-coupled receptor, 1 | gi 59858119,gi 60650208,gi 6188268,gi 61889066,gi 7509066,gi 75070049,gi 88954151 | 42,933.90 | 100.00% | 3 | 3 | 3 | 0.03% | 11.30% | FTRPIIA<br>GMEFSR                              | 4.43 | 1,540.79 |
| ATP | 6018 | endothelial differentiation, sphingolipid G-protein-coupled receptor, 1 | gi 59858119,gi 60650208,gi 6188268,gi 61889066,gi 7509066,gi 75070049,gi 88954151 | 42,933.90 | 100.00% | 3 | 3 | 3 | 0.03% | 11.30% | SDNSSH<br>PQKDDG<br>DNPETI<br>MSSGNV<br>NSSS   | 4.96 | 2,922.19 |
| ATP | 6018 | endothelial differentiation, sphingolipid G-protein-coupled receptor, 1 | gi 59858119,gi 60650208,gi 6188268,gi 61889066,gi 7509066,gi 75070049,gi 88954151 | 42,933.90 | 100.00% | 3 | 3 | 3 | 0.03% | 11.30% | SKSDNS<br>SHPQKD<br>DGDNPE<br>TIMSSG<br>NVNSSS | 3.18 | 3,137.32 |

|     |      |                                                                                                         |                           |           |         |   |   |    |       |        |                               |      |          |
|-----|------|---------------------------------------------------------------------------------------------------------|---------------------------|-----------|---------|---|---|----|-------|--------|-------------------------------|------|----------|
| ATP | 6018 | Chromosome 20 open reading frame 108 ortholog                                                           | gi 119224079,gi 122692571 | 20,430.00 | 99.80%  | 2 | 2 | 2  | 0.02% | 12.50% | ISITLVS VPLIVR                | 3.46 | 1,409.91 |
| ATP | 6018 | Chromosome 20 open reading frame 108 ortholog                                                           | gi 119224079,gi 122692571 | 20,430.00 | 99.80%  | 2 | 2 | 2  | 0.02% | 12.50% | VGIFKPP AAKP                  | 2.58 | 1,124.68 |
| ATP | 6018 | PREDICTED: similar to mKIAA4036 protein isoform 2                                                       | gi 119917518              | 67,513.30 | 100.00% | 3 | 4 | 6  | 0.05% | 8.01%  | SISHYHE TLGEAL QGVELE FSGLDIK | 4.32 | 2,872.44 |
| ATP | 6018 | PREDICTED: similar to mKIAA4036 protein isoform 2                                                       | gi 119917518              | 67,513.30 | 100.00% | 3 | 4 | 6  | 0.05% | 8.01%  | VNAVPR PIPEK                  | 2.19 | 1,219.72 |
| ATP | 6018 | PREDICTED: similar to mKIAA4036 protein isoform 2                                                       | gi 119917518              | 67,513.30 | 100.00% | 3 | 4 | 6  | 0.05% | 8.01%  | YLDPSFF QHR                   | 2.43 | 1,309.63 |
| ATP | 6018 | PREDICTED: similar to Transmembrane emp24 domain-containing protein 2 precursor (Membrane protein p24A) | gi 194674620              | 22,715.40 | 99.80%  | 2 | 2 | 10 | 0.09% | 12.40% | IVMFTID IGEAPK                | 3.87 | 1,449.77 |
| ATP | 6018 | PREDICTED: similar to Transmembrane emp24 domain-containing protein 2 precursor (Membrane protein p24A) | gi 194674620              | 22,715.40 | 99.80%  | 2 | 2 | 10 | 0.09% | 12.40% | YTFAAH MDGTY K                | 3.72 | 1,420.62 |

|     |      |                                                                                                    |                                                         |           |         |   |   |    |       |        |                                       |      |          |
|-----|------|----------------------------------------------------------------------------------------------------|---------------------------------------------------------|-----------|---------|---|---|----|-------|--------|---------------------------------------|------|----------|
| ATP | 6018 | PREDICTED:<br>integrin,<br>beta 3<br>(platelet<br>glycoprotein IIIa,<br>antigen CD61)<br>isoform 1 | gi 7667065<br>7                                         | 86,518.30 | 100.00% | 5 | 6 | 9  | 0.08% | 6.12%  | EATSTFT<br>NITYR                      | 3.78 | 1,403.68 |
| ATP | 6018 | PREDICTED:<br>integrin,<br>beta 3<br>(platelet<br>glycoprotein IIIa,<br>antigen CD61)<br>isoform 1 | gi 7667065<br>7                                         | 86,518.30 | 100.00% | 5 | 6 | 9  | 0.08% | 6.12%  | GTGDSS<br>QITQVSP<br>QR               | 4.37 | 1,560.76 |
| ATP | 6018 | PREDICTED:<br>integrin,<br>beta 3<br>(platelet<br>glycoprotein IIIa,<br>antigen CD61)<br>isoform 1 | gi 7667065<br>7                                         | 86,518.30 | 100.00% | 5 | 6 | 9  | 0.08% | 6.12%  | HVLTLT<br>DQVTR                       | 2.91 | 1,282.71 |
| ATP | 6018 | PREDICTED:<br>integrin,<br>beta 3<br>(platelet<br>glycoprotein IIIa,<br>antigen CD61)<br>isoform 1 | gi 7667065<br>7                                         | 86,518.30 | 100.00% | 5 | 6 | 9  | 0.08% | 6.12%  | ILEARPL<br>SDKGTG<br>DSSQITQ<br>VSPQR | 6.05 | 2,683.40 |
| ATP | 6018 | PREDICTED:<br>integrin,<br>beta 3<br>(platelet<br>glycoprotein IIIa,<br>antigen CD61)<br>isoform 1 | gi 7667065<br>7                                         | 86,518.30 | 100.00% | 5 | 6 | 9  | 0.08% | 6.12%  | PLSDKG<br>TGDSSQI<br>TQVSPQ<br>R      | 5.61 | 2,101.05 |
| ATP | 6018 | heat shock<br>90kDa<br>protein 1,<br>beta 67684                                                    | gi 1186018<br>68,gi 34392<br>345,gi 7507<br>2499,gi 957 | 83,238.20 | 100.00% | 6 | 6 | 10 | 0.09% | 13.30% | ELISNAS<br>DALDKI<br>R                | 3.84 | 1,544.83 |
| ATP | 6018 | heat shock<br>90kDa<br>protein 1,<br>beta 67684                                                    | gi 1186018<br>68,gi 34392<br>345,gi 7507<br>2499,gi 957 | 83,238.20 | 100.00% | 6 | 6 | 10 | 0.09% | 13.30% | EQVANS<br>AFVER                       | 2.1  | 1,249.62 |
| ATP | 6018 | heat shock<br>90kDa<br>protein 1,<br>beta 67684                                                    | gi 1186018<br>68,gi 34392<br>345,gi 7507<br>2499,gi 957 | 83,238.20 | 100.00% | 6 | 6 | 10 | 0.09% | 13.30% | GVVDSE<br>DLPLNIS<br>R                | 4.63 | 1,513.79 |
| ATP | 6018 | heat shock<br>90kDa<br>protein 1,<br>beta 67684                                                    | gi 1186018<br>68,gi 34392<br>345,gi 7507<br>2499,gi 957 | 83,238.20 | 100.00% | 6 | 6 | 10 | 0.09% | 13.30% | HSQFIGY<br>PITLYLE<br>K               | 3.13 | 1,808.96 |



|     |      |                                                                                                                                      |                                                      |           |         |   |   |    |       |        |                              |          |
|-----|------|--------------------------------------------------------------------------------------------------------------------------------------|------------------------------------------------------|-----------|---------|---|---|----|-------|--------|------------------------------|----------|
| ATP | 6018 | heat shock 90kDa protein 1, beta                                                                                                     | gi 1186018 68,gi 34392 345,gi 7507 2499,gi 957 67684 | 83,238.20 | 100.00% | 6 | 6 | 10 | 0.09% | 13.30% | NPDDITQ 3.72<br>EEYGEF<br>YK | 1,847.80 |
| ATP | 6018 | heat shock 90kDa protein 1, beta                                                                                                     | gi 1186018 68,gi 34392 345,gi 7507 2499,gi 957 67684 | 83,238.20 | 100.00% | 6 | 6 | 10 | 0.09% | 13.30% | TLTLVD 4.41<br>TGIGMT<br>K   | 1,365.73 |
| ATP | 6018 | heat shock 90kDa protein 1, beta                                                                                                     | gi 1186018 68,gi 34392 345,gi 7507 2499,gi 957 67684 | 83,238.20 | 100.00% | 6 | 6 | 10 | 0.09% | 13.30% | YESLTD 4.17<br>PSKLDS<br>GK  | 1,539.75 |
| ATP | 6018 | RecName : Full=Adiponectin; AltName: Full=Adipocyte complement-related protein; AltName: Full=30 kDa adipocyte complement-related 30 | gi 1141585 76,gi 14618 6777,gi 736 97558             | 26,115.60 | 100.00% | 3 | 3 | 3  | 0.03% | 15.00% | ALLFTH 3.09<br>DQFQDK        | 1,462.73 |
| ATP | 6018 | RecName : Full=Adiponectin; AltName: Full=Adipocyte complement-related 30                                                            | gi 1141585 76,gi 14618 6777,gi 736 97558             | 26,115.60 | 100.00% | 3 | 3 | 3  | 0.03% | 15.00% | IFYNQQ 3.62<br>NHYDGT<br>TGK | 1,785.82 |

|     |      |                                                                                                                                                                                                                                                                                                                                        |           |         |   |   |   |       |        |                                     |      |          |
|-----|------|----------------------------------------------------------------------------------------------------------------------------------------------------------------------------------------------------------------------------------------------------------------------------------------------------------------------------------------|-----------|---------|---|---|---|-------|--------|-------------------------------------|------|----------|
| ATP | 6018 | RecName gi 1141585 :<br>76,gi 14618<br>Full=Adi 6777,gi 736<br>ponectin; 97558<br>AltName:<br>Full=Adi<br>pocyte,<br>C1q and<br>collagen<br>domain-<br>containin<br>g protein;<br>AltName:<br>Full=30<br>kDa<br>adipocyte<br>complem<br>ent-<br>related<br>protein;<br>AltName:<br>Full=Adi<br>pocyte<br>complem<br>ent-<br>related 30 | 26,115.60 | 100.00% | 3 | 3 | 3 | 0.03% | 15.00% | SAFSVG<br>LER                       | 2.17 | 965.505  |
| ATP | 6018 | Solute carrier family 1 (neutral amino acid transporter), member 5<br>gi 1153052<br>16,gi 15145<br>909,gi 2154<br>1958,gi 278<br>07087                                                                                                                                                                                                 | 56,431.20 | 99.80%  | 2 | 2 | 4 | 0.03% | 4.45%  | EVLDSFL<br>DLVR                     | 3.02 | 1,305.71 |
| ATP | 6018 | Solute carrier family 1 (neutral amino acid transporter), member 5<br>gi 1153052<br>16,gi 15145<br>909,gi 2154<br>1958,gi 278<br>07087                                                                                                                                                                                                 | 56,431.20 | 99.80%  | 2 | 2 | 4 | 0.03% | 4.45%  | NIFPSNL<br>VSAAFR                   | 3.06 | 1,435.77 |
| ATP | 6018 | PREDICTED: protein disulfide isomerase family A, member 6 isoform 7<br>gi 1199039<br>61,gi 15155<br>3573                                                                                                                                                                                                                               | 64,497.70 | 100.00% | 5 | 5 | 6 | 0.05% | 14.10% | ALDLFS<br>DNAPPP<br>ELLEINE<br>DVAK | 4.37 | 2,623.35 |
| ATP | 6018 | PREDICTED: protein disulfide isomerase family A, member 6 isoform 7<br>gi 1199039<br>61,gi 15155<br>3573                                                                                                                                                                                                                               | 64,497.70 | 100.00% | 5 | 5 | 6 | 0.05% | 14.10% | GSFSEQ<br>GINEFLR                   | 4.06 | 1,483.72 |

|     |      |                                                                      |                             |           |         |   |   |   |       |        |                                |          |
|-----|------|----------------------------------------------------------------------|-----------------------------|-----------|---------|---|---|---|-------|--------|--------------------------------|----------|
| ATP | 6018 | PREDIC TED: protein disulfide isomerase family A, member 6 isoform 7 | gi 1199039 61.gi 15155 3573 | 64,497.70 | 100.00% | 5 | 5 | 6 | 0.05% | 14.10% | GSTAPV 4.14<br>GGGAFP<br>TISTR | 1,575.81 |
| ATP | 6018 | PREDIC TED: protein disulfide isomerase family A, member 6 isoform 7 | gi 1199039 61.gi 15155 3573 | 64,497.70 | 100.00% | 5 | 5 | 6 | 0.05% | 14.10% | LAAVDA 4.79<br>TVNQVL<br>ASR   | 1,527.85 |
| ATP | 6018 | PREDIC TED: protein disulfide isomerase family A, member 6 isoform 7 | gi 1199039 61.gi 15155 3573 | 64,497.70 | 100.00% | 5 | 5 | 6 | 0.05% | 14.10% | TGEAIV 3.3<br>DAALSA<br>LR     | 1,386.76 |
| ATP | 6018 | Deoxyribonuclease I-like 1                                           | gi 1515535 71               | 35,175.30 | 100.00% | 3 | 4 | 4 | 0.03% | 9.49%  | IVLHGE 2.65<br>HLQSL<br>R      | 1,514.88 |
| ATP | 6018 | Deoxyribonuclease I-like 1                                           | gi 1515535 71               | 35,175.30 | 100.00% | 3 | 4 | 4 | 0.03% | 9.49%  | SKVLPSL 3.41<br>VLVPLH<br>TTPK | 1,829.13 |
| ATP | 6018 | Deoxyribonuclease I-like 1                                           | gi 1515535 71               | 35,175.30 | 100.00% | 3 | 4 | 4 | 0.03% | 9.49%  | VLPSLVL 3.34<br>VPLHTT<br>PK   | 1,614.00 |

TABLE S1: Detailed peptide report showing treatment group, subject, protein name, protein accession numbers, protein molecular weight, protein identification probability, number (#) of unique peptides, # of unique spectra, # of total spectra, % total spectra, % sequence coverage, peptide sequence, best Sequest cross (X) correlation score, and calculated 1+H peptide mass (AMU).
